# Supplementary material for: Genomic alterations caused by HPV integration in a cohort of Chinese endocervical adenocarcinomas
Source: PubMed Central journal article supplement (PMC8636260; doi:10.1038/s41417-020-00283-4), 2021-01-04
Supplement: 41417_2020_283_MOESM5_ESM.pdf [file 41417_2020_283_MOESM5_ESM.pdf]

**Supplementary Table 4**

**Detail of somatic SNV detected in each case by whole genome sequencing.**

| Patient | CHRO | POS      | ID        | REF | ALT | QU | FILTER | Gene     | Transcript | Gen       | Ge | Exonic | Func     |
|---------|------|----------|-----------|-----|-----|----|--------|----------|------------|-----------|----|--------|----------|
| ACa01   | 1    | 135040   | rs6264213 | T   | C   | .  | PASS   | LINC0111 | ncR        | NR_111111 | .  | .      | .        |
| ACa01   | 1    | 137263   | rs8798212 | A   | G   | .  | PASS   | LINC0111 | ncR        | NR_111111 | .  | .      | .        |
| ACa01   | 1    | 934378   | .         | C   | T   | .  | PASS   | HES4     | UTR        | NM_001111 | .  | .      | .        |
| ACa01   | 1    | 8126760  | rs2011489 | C   | T   | .  | PASS   | .        | intra      | NM_dis    | .  | .      | .        |
| ACa01   | 1    | 11589972 | rs7706792 | G   | A   | .  | PASS   | PTCHD1   | exon       | NM_001111 | .  | .      | missense |
| ACa01   | 1    | 11856167 | .         | C   | T   | .  | PASS   | MTHFR    | intra      | NM_001111 | .  | .      | .        |
| ACa01   | 1    | 13036141 | rs7573447 | A   | G   | .  | PASS   | PRAME    | intra      | NM_001111 | .  | .      | .        |
| ACa01   | 1    | 16891786 | .         | G   | T   | .  | PASS   | NBPF1    | intra      | NM_001111 | .  | .      | .        |
| ACa01   | 1    | 16911827 | rs643011  | C   | G   | .  | PASS   | NBPF1    | intra      | NM_001111 | .  | .      | .        |
| ACa01   | 1    | 17007664 | rs1891369 | T   | C   | .  | PASS   | .        | ups        | NR_111111 | .  | .      | .        |
| ACa01   | 1    | 19071199 | rs7967920 | G   | A   | .  | PASS   | PAX7     | intra      | NM_001111 | .  | .      | .        |
| ACa01   | 1    | 28930226 | .         | A   | C   | .  | PASS   | TAF12    | intra      | NM_001111 | .  | .      | .        |
| ACa01   | 1    | 38433845 | rs3699237 | G   | A   | .  | PASS   | SF3A3    | intra      | NM_001111 | .  | .      | .        |
| ACa01   | 1    | 56673667 | .         | G   | A   | .  | PASS   | .        | intra      | NR_dis    | .  | .      | .        |
| ACa01   | 1    | 60381458 | .         | A   | C   | .  | PASS   | CYP2J2   | intra      | NM_001111 | .  | .      | .        |
| ACa01   | 1    | 1.12E+08 | .         | G   | A   | .  | PASS   | CEPT1    | intra      | NM_001111 | .  | .      | .        |
| ACa01   | 1    | 1.21E+08 | .         | A   | T   | .  | PASS   | .        | intra      | NR_dis    | .  | .      | .        |
| ACa01   | 1    | 1.43E+08 | rs1809861 | G   | A   | .  | PASS   | .        | intra      | NON_dis   | .  | .      | .        |
| ACa01   | 1    | 1.43E+08 | rs3742168 | A   | C   | .  | PASS   | .        | intra      | NR_dis    | .  | .      | .        |
| ACa01   | 1    | 1.43E+08 | rs1409433 | T   | C   | .  | PASS   | .        | intra      | NR_dis    | .  | .      | .        |
| ACa01   | 1    | 1.43E+08 | rs7967822 | G   | A   | .  | PASS   | .        | ncR        | NR_111111 | .  | .      | .        |
| ACa01   | 1    | 1.43E+08 | rs7763460 | C   | G   | .  | PASS   | .        | ncR        | NR_111111 | .  | .      | .        |
| ACa01   | 1    | 1.43E+08 | .         | A   | T   | .  | PASS   | .        | intra      | NR_dis    | .  | .      | .        |
| ACa01   | 1    | 1.43E+08 | rs1694653 | C   | G   | .  | PASS   | .        | intra      | NR_dis    | .  | .      | .        |
| ACa01   | 1    | 1.45E+08 | rs1129555 | G   | A   | .  | PASS   | NBPF8    | intra      | NM_001111 | .  | .      | .        |
| ACa01   | 1    | 1.45E+08 | rs3732644 | C   | T   | .  | PASS   | NBPF8    | intra      | NM_001111 | .  | .      | .        |
| ACa01   | 1    | 1.45E+08 | .         | T   | C   | .  | PASS   | PDE4D    | exon       | NM_001111 | .  | .      | missense |
| ACa01   | 1    | 1.45E+08 | rs2691756 | T   | C   | .  | PASS   | NBPF9    | intra      | NM_001111 | .  | .      | .        |
| ACa01   | 1    | 1.45E+08 | .         | A   | G   | .  | PASS   | NBPF2    | ncR        | NR_111111 | .  | .      | .        |
| ACa01   | 1    | 1.45E+08 | .         | G   | T   | .  | PASS   | NBPF2    | ncR        | NR_111111 | .  | .      | .        |
| ACa01   | 1    | 1.46E+08 | .         | G   | A   | .  | PASS   | NBPF2    | ncR        | NR_111111 | .  | .      | .        |
| ACa01   | 1    | 1.47E+08 | rs1932337 | C   | T   | .  | PASS   | .        | intra      | NR_dis    | .  | .      | .        |
| ACa01   | 1    | 1.48E+08 | .         | C   | G   | .  | PASS   | NBPF8    | intra      | NM_001111 | .  | .      | .        |
| ACa01   | 1    | 1.48E+08 | rs2837929 | G   | A   | .  | PASS   | NBPF8    | intra      | NM_001111 | .  | .      | .        |
| ACa01   | 1    | 1.49E+08 | rs2983273 | A   | C   | .  | PASS   | .        | intra      | NR_dis    | .  | .      | .        |
| ACa01   | 1    | 1.53E+08 | rs3740307 | C   | T   | .  | PASS   | PGLYR1   | exon       | NM_001111 | .  | .      | synonym  |
| ACa01   | 1    | 1.62E+08 | rs1674785 | C   | T   | .  | PASS   | .        | UTR        | NM_001111 | .  | .      | .        |
| ACa01   | 1    | 1.62E+08 | rs1485348 | T   | G   | .  | PASS   | FCGR2    | exon       | NM_001111 | .  | .      | missense |
| ACa01   | 1    | 1.67E+08 | rs7598068 | G   | A   | .  | PASS   | POU2F1   | exon       | NM_001111 | .  | .      | missense |
| ACa01   | 1    | 2.1E+08  | .         | G   | T   | .  | PASS   | DIEXF    | intra      | NM_001111 | .  | .      | .        |
| ACa01   | 1    | 2.26E+08 | .         | A   | C   | .  | PASS   | LBR      | intra      | NM_001111 | .  | .      | .        |
| ACa01   | 1    | 2.38E+08 | .         | A   | C   | .  | PASS   | LOC100   | ncR        | NR_111111 | .  | .      | .        |
| ACa01   | 1    | 2.43E+08 | rs2006447 | A   | G   | .  | PASS   | CEP170   | exon       | NM_001111 | .  | .      | synonym  |
| ACa01   | 1    | 2.49E+08 | rs3739868 | A   | G   | .  | PASS   | .        | ups        | NM_001111 | .  | .      | .        |
| ACa01   | 1    | 2.49E+08 | rs1782199 | G   | T   | .  | PASS   | .        | ups        | NM_001111 | .  | .      | .        |
| ACa01   | 2    | 83738306 | rs3461159 | C   | A   | .  | PASS   | .        | intra      | NR_dis    | .  | .      | .        |
| ACa01   | 2    | 91744332 | rs8689209 | G   | A   | .  | PASS   | .        | intra      | NON_dis   | .  | .      | .        |
| ACa01   | 2    | 91837965 | .         | C   | T   | .  | PASS   | LOC654   | ncR        | NR_111111 | .  | .      | .        |
| ACa01   | 2    | 1.03E+08 | .         | A   | G   | .  | PASS   | IL1R1    | exon       | NM_001111 | .  | .      | missense |
| ACa01   | 2    | 1.14E+08 | rs3877497 | T   | G   | .  | PASS   | FAM13C   | ncR        | NR_111111 | .  | .      | .        |

|       |   |          |           |   |   |   |      |         |       |     |     |         |
|-------|---|----------|-----------|---|---|---|------|---------|-------|-----|-----|---------|
| ACa01 | 2 | 1.25E+08 | rs1037863 | A | G | . | PASS | CNTNA1  | intrc | NM_ | .   | .       |
| ACa01 | 2 | 1.31E+08 | rs1839843 | T | C | . | PASS | POTEF   | exo   | NM_ | .   | synonyr |
| ACa01 | 2 | 1.31E+08 | .         | C | A | . | PASS | POTEF   | exo   | NM_ | .   | missens |
| ACa01 | 2 | 1.35E+08 | .         | C | T | . | PASS | MGAT5   | intrc | NM_ | .   | .       |
| ACa01 | 2 | 1.45E+08 | .         | A | T | . | PASS | ZEB2    | exo   | NM_ | .   | missens |
| ACa01 | 2 | 1.74E+08 | .         | T | G | . | PASS | CDCA7   | intrc | NM_ | .   | .       |
| ACa01 | 2 | 1.99E+08 | .         | C | T | . | PASS | MARS2   | exo   | NM_ | .   | missens |
| ACa01 | 2 | 2.09E+08 | .         | T | G | . | PASS | PLEKH1  | exo   | NM_ | .   | missens |
| ACa01 | 2 | 2.09E+08 | rs7812258 | C | T | . | PASS | PTH2R   | intrc | NM_ | .   | .       |
| ACa01 | 2 | 2.2E+08  | rs1010785 | C | T | . | PASS | DNAJB2  | intrc | NM_ | .   | .       |
| ACa01 | 2 | 2.34E+08 | rs7526847 | A | C | . | PASS | .       | inte  | NM_ | dis | .       |
| ACa01 | 3 | 15070036 | .         | T | G | . | PASS | NR2C2   | intrc | NM_ | .   | .       |
| ACa01 | 3 | 15275297 | .         | T | G | . | PASS | CAPN7   | intrc | NM_ | .   | .       |
| ACa01 | 3 | 20153132 | .         | C | G | . | PASS | KAT2B   | exo   | NM_ | .   | missens |
| ACa01 | 3 | 38050749 | .         | G | A | . | PASS | PLCD1   | intrc | NM_ | .   | .       |
| ACa01 | 3 | 38753882 | rs1450320 | C | T | . | PASS | SCN10A  | exo   | NM_ | .   | missens |
| ACa01 | 3 | 38770232 | rs1398610 | C | T | . | PASS | SCN10A  | exo   | NM_ | .   | missens |
| ACa01 | 3 | 73673407 | .         | G | A | . | PASS | PDZRN1  | exo   | NM_ | .   | synonyr |
| ACa01 | 3 | 97868559 | rs1126455 | G | T | . | PASS | OR5H1A  | exo   | NM_ | .   | synonyr |
| ACa01 | 3 | 1.02E+08 | .         | C | G | . | PASS | NFKBIZ  | intrc | NM_ | .   | .       |
| ACa01 | 3 | 1.02E+08 | rs7541975 | C | T | . | PASS | NFKBIZ  | intrc | NM_ | .   | .       |
| ACa01 | 3 | 1.08E+08 | rs3757741 | G | A | . | PASS | IFT57   | exo   | NM_ | .   | missens |
| ACa01 | 3 | 1.92E+08 | .         | C | T | . | PASS | .       | inte  | NR_ | dis | .       |
| ACa01 | 3 | 1.95E+08 | rs6228513 | T | C | . | PASS | .       | inte  | NM_ | dis | .       |
| ACa01 | 3 | 1.95E+08 | .         | C | T | . | PASS | .       | inte  | NM_ | dis | .       |
| ACa01 | 4 | 49846    | rs4970287 | C | T | . | PASS | .       | inte  | NOI | dis | .       |
| ACa01 | 4 | 84398700 | .         | T | G | . | PASS | FAM175B | intrc | NM_ | .   | .       |
| ACa01 | 4 | 1.21E+08 | rs3764069 | C | T | . | PASS | .       | inte  | NR_ | dis | .       |
| ACa01 | 4 | 1.33E+08 | rs7963572 | G | A | . | PASS | .       | inte  | NR_ | dis | .       |
| ACa01 | 4 | 1.45E+08 | rs9542709 | C | T | . | PASS | FREM3   | exo   | NM_ | .   | missens |
| ACa01 | 4 | 1.59E+08 | rs3721454 | C | T | . | PASS | FAM19E  | intrc | NM_ | .   | .       |
| ACa01 | 4 | 1.89E+08 | .         | C | T | . | PASS | TRIML1  | exo   | NM_ | .   | synonyr |
| ACa01 | 5 | 840233   | rs649883  | T | C | . | PASS | ZDHHC1  | intrc | NM_ | .   | .       |
| ACa01 | 5 | 1593082  | rs1467072 | G | A | . | PASS | SDHAP1  | ncR   | NR_ | .   | .       |
| ACa01 | 5 | 21196870 | .         | C | A | . | PASS | .       | inte  | NM_ | dis | .       |
| ACa01 | 5 | 21492197 | rs1500138 | A | G | . | PASS | GUSBP   | ncR   | NR_ | .   | .       |
| ACa01 | 5 | 37299166 | .         | T | G | . | PASS | NUP155  | intrc | NM_ | .   | .       |
| ACa01 | 5 | 65028907 | rs7962294 | T | C | . | PASS | NLN     | intrc | NM_ | .   | .       |
| ACa01 | 5 | 69784758 | .         | C | G | . | PASS | LOC441  | ncR   | NR_ | .   | .       |
| ACa01 | 5 | 1.02E+08 | .         | A | G | . | PASS | PIIP5K  | intrc | NM_ | .   | .       |
| ACa01 | 5 | 1.11E+08 | rs7609290 | C | T | . | PASS | CAMK4   | exo   | NM_ | .   | synonyr |
| ACa01 | 5 | 1.34E+08 | .         | C | T | . | PASS | PPP2C7  | intrc | NM_ | .   | .       |
| ACa01 | 5 | 1.41E+08 | rs7647428 | C | T | . | PASS | PCDHG   | exo   | NM_ | .   | missens |
| ACa01 | 5 | 1.76E+08 | rs1407436 | A | C | . | PASS | .       | inte  | NR_ | dis | .       |
| ACa01 | 5 | 1.81E+08 | rs7380674 | G | C | . | PASS | .       | inte  | NR_ | dis | .       |
| ACa01 | 6 | 7517870  | rs5568001 | G | A | . | PASS | .       | inte  | NM_ | dis | .       |
| ACa01 | 6 | 52656696 | rs3977792 | T | G | . | PASS | GSTA1   | exo   | NM_ | .   | missens |
| ACa01 | 6 | 57841232 | .         | T | C | . | PASS | .       | inte  | NM_ | dis | .       |
| ACa01 | 6 | 79724810 | .         | A | G | . | PASS | PHIP    | exo   | NM_ | .   | missens |
| ACa01 | 6 | 80663139 | rs9844362 | C | T | . | PASS | .       | inte  | NM_ | dis | .       |
| ACa01 | 6 | 1.01E+08 | .         | T | A | . | PASS | .       | inte  | NM_ | dis | .       |
| ACa01 | 6 | 1.08E+08 | rs9992807 | T | C | . | PASS | PDSS2   | intrc | NM_ | .   | .       |
| ACa01 | 6 | 1.09E+08 | .         | C | T | . | PASS | ARMC2   | exo   | NM_ | .   | missens |
| ACa01 | 6 | 1.34E+08 | rs7554849 | G | A | . | PASS | SLC2A1  | exo   | NM_ | .   | synonyr |

|       |    |          |           |   |   |   |      |        |       |         |   |         |
|-------|----|----------|-----------|---|---|---|------|--------|-------|---------|---|---------|
| ACa01 | 6  | 1.45E+08 | .         | G | A | . | PASS | UTRN   | intrc | NM_     | . | .       |
| ACa01 | 6  | 1.47E+08 | rs7747387 | C | T | . | PASS | ADGB   | exo   | NM_     | . | synonyr |
| ACa01 | 6  | 1.5E+08  | rs1467177 | C | T | . | PASS | RAET1L | intrc | NM_     | . | .       |
| ACa01 | 7  | 2418057  | .         | G | T | . | PASS | EIF3B  | intrc | NM_     | . | .       |
| ACa01 | 7  | 17904468 | rs7308136 | G | C | . | PASS | SNX13  | intrc | NM_     | . | .       |
| ACa01 | 7  | 44149192 | .         | G | A | . | PASS | AEBP1  | intrc | NM_     | . | .       |
| ACa01 | 7  | 56439839 | .         | C | T | . | PASS | .      | inte  | NM_ dis | . | .       |
| ACa01 | 7  | 56891402 | rs7911953 | C | T | . | PASS | .      | inte  | NR_ dis | . | .       |
| ACa01 | 7  | 56891487 | .         | G | C | . | PASS | .      | inte  | NR_ dis | . | .       |
| ACa01 | 7  | 57008817 | .         | C | T | . | PASS | .      | inte  | NR_ dis | . | .       |
| ACa01 | 7  | 57529608 | .         | A | C | . | PASS | ZNF716 | exo   | NM_     | . | missens |
| ACa01 | 7  | 61970351 | rs4311554 | G | T | . | PASS | .      | inte  | NOI dis | . | .       |
| ACa01 | 7  | 63019476 | .         | G | T | . | PASS | .      | inte  | NR_ dis | . | .       |
| ACa01 | 7  | 63096227 | .         | G | A | . | PASS | .      | inte  | NR_ dis | . | .       |
| ACa01 | 7  | 63210059 | rs5467260 | G | A | . | PASS | .      | inte  | NR_ dis | . | .       |
| ACa01 | 7  | 63210067 | .         | C | G | . | PASS | .      | inte  | NR_ dis | . | .       |
| ACa01 | 7  | 63213633 | rs8688020 | G | A | . | PASS | .      | inte  | NR_ dis | . | .       |
| ACa01 | 7  | 74237397 | rs8799757 | G | T | . | PASS | GTF2IR | intrc | NM_     | . | .       |
| ACa01 | 7  | 92845041 | rs7686126 | G | A | . | PASS | HEPAC  | intrc | NM_     | . | .       |
| ACa01 | 7  | 1.02E+08 | rs3727203 | G | C | . | PASS | POLR2  | intrc | NM_     | . | .       |
| ACa01 | 7  | 1.25E+08 | rs7809364 | G | A | . | PASS | POT1   | exo   | NM_     | . | missens |
| ACa01 | 7  | 1.3E+08  | .         | G | A | . | PASS | SSMEM  | exo   | NM_     | . | synonyr |
| ACa01 | 7  | 1.52E+08 | rs7754267 | A | G | . | PASS | KMT2C  | exo   | NM_     | . | synonyr |
| ACa01 | 7  | 1.52E+08 | rs1499922 | C | T | . | PASS | KMT2C  | exo   | NM_     | . | missens |
| ACa01 | 7  | 1.52E+08 | .         | C | T | . | PASS | KMT2C  | UTF   | NM_ NM_ | . | .       |
| ACa01 | 7  | 1.59E+08 | rs1407758 | C | T | . | PASS | .      | inte  | NM_ dis | . | .       |
| ACa01 | 7  | 1.59E+08 | rs1482637 | T | C | . | PASS | .      | inte  | NM_ dis | . | .       |
| ACa01 | 8  | 7877648  | .         | C | A | . | PASS | .      | inte  | NR_ dis | . | .       |
| ACa01 | 8  | 17570524 | .         | A | G | . | PASS | MTUS1  | intrc | NM_     | . | .       |
| ACa01 | 8  | 21859882 | .         | A | C | . | PASS | XPO7   | intrc | NM_     | . | .       |
| ACa01 | 8  | 25296822 | .         | T | G | . | PASS | KCTD9  | exo   | NM_     | . | missens |
| ACa01 | 8  | 39742519 | rs1813428 | G | A | . | PASS | .      | inte  | NM_ dis | . | .       |
| ACa01 | 8  | 43822531 | rs2022368 | A | G | . | PASS | .      | inte  | NM_ dis | . | .       |
| ACa01 | 8  | 73137623 | .         | T | C | . | PASS | LOC392 | ncR   | NR_     | . | .       |
| ACa01 | 8  | 82588523 | rs1837720 | A | T | . | PASS | IMPA1  | intrc | NM_     | . | .       |
| ACa01 | 9  | 39174437 | rs1329860 | T | C | . | PASS | CNTNA  | intrc | NM_     | . | .       |
| ACa01 | 9  | 65602674 | rs2954515 | T | C | . | PASS | .      | inte  | NM_ dis | . | .       |
| ACa01 | 9  | 66500520 | rs1968548 | C | A | . | PASS | PTGER  | ncR   | NR_     | . | .       |
| ACa01 | 9  | 66501146 | rs2019611 | G | A | . | PASS | PTGER  | ncR   | NR_     | . | .       |
| ACa01 | 9  | 68415282 | rs4928839 | A | C | . | PASS | .      | inte  | NM_ dis | . | .       |
| ACa01 | 9  | 96051030 | .         | G | A | . | PASS | WNK2   | intrc | NM_     | . | .       |
| ACa01 | 9  | 1.16E+08 | rs2868900 | G | A | . | PASS | .      | inte  | NM_ dis | . | .       |
| ACa01 | 9  | 1.31E+08 | .         | C | T | . | PASS | ENG    | exo   | NM_     | . | synonyr |
| ACa01 | 9  | 1.33E+08 | .         | T | G | . | PASS | FNBP1  | exo   | NM_     | . | synonyr |
| ACa01 | 9  | 1.36E+08 | .         | A | G | . | PASS | ADAMT  | intrc | NM_     | . | .       |
| ACa01 | 9  | 1.37E+08 | rs7694907 | C | T | . | PASS | DBH    | exo   | NM_     | . | synonyr |
| ACa01 | 10 | 14909181 | .         | G | A | . | PASS | HSPA14 | exo   | NM_     | . | missens |
| ACa01 | 10 | 15177202 | rs1051909 | T | G | . | PASS | NMT2   | intrc | NM_     | . | .       |
| ACa01 | 10 | 26443696 | .         | C | T | . | PASS | MYO3A  | exo   | NM_     | . | missens |
| ACa01 | 10 | 26491918 | .         | G | A | . | PASS | MYO3A  | exo   | NM_     | . | missens |
| ACa01 | 10 | 28260161 | rs7531795 | G | A | . | PASS | ARMC4  | exo   | NM_     | . | unknow  |
| ACa01 | 10 | 29822153 | rs5566342 | C | T | . | PASS | SVIL   | exo   | NM_     | . | synonyr |
| ACa01 | 10 | 37442619 | rs1759036 | G | T | . | PASS | ANKRD  | intrc | NM_     | . | .       |
| ACa01 | 10 | 38356181 | .         | C | T | . | PASS | .      | inte  | NM_ dis | . | .       |

|       |    |          |           |   |   |   |      |                        |              |
|-------|----|----------|-----------|---|---|---|------|------------------------|--------------|
| ACa01 | 10 | 38938279 | rs1494650 | A | C | . | PASS | .                      | inte NR_dis. |
| ACa01 | 10 | 38990567 | rs5524339 | C | T | . | PASS | ACTR3 ncR NR_.         |              |
| ACa01 | 10 | 47207765 | rs7827248 | T | A | . | PASS | AGAP9 intrc NM_.       |              |
| ACa01 | 10 | 48389068 | rs7821206 | C | T | . | PASS | RBP3 exo NM_ missens   |              |
| ACa01 | 10 | 62498154 | .         | C | A | . | PASS | .                      |              |
| ACa01 | 10 | 69991321 | .         | C | T | . | PASS | ATOH7 exo NM_ synonymr |              |
| ACa01 | 10 | 70451076 | rs1810812 | C | T | . | PASS | TET1 exo NM_ synonymr  |              |
| ACa01 | 10 | 70646055 | rs1852770 | G | A | . | PASS | STOX1 exo NM_ missens  |              |
| ACa01 | 10 | 75457579 | .         | G | T | . | PASS | .                      |              |
| ACa01 | 10 | 90983620 | .         | A | C | . | PASS | LIPA intrc NM_.        |              |
| ACa01 | 10 | 98510422 | rs9002476 | C | T | . | PASS | .                      |              |
| ACa01 | 10 | 1.06E+08 | .         | A | G | . | PASS | COL17 intrc NM_.       |              |
| ACa01 | 10 | 1.17E+08 | rs1028763 | G | A | . | PASS | TRUB1 intrc NM_.       |              |
| ACa01 | 11 | 4880803  | .         | G | T | . | PASS | .                      |              |
| ACa01 | 11 | 28332552 | rs7615769 | A | T | . | PASS | METTL intrc NM_.       |              |
| ACa01 | 11 | 36514292 | .         | G | A | . | PASS | TRAF6 intrc NM_.       |              |
| ACa01 | 11 | 49071349 | .         | T | G | . | PASS | .                      |              |
| ACa01 | 11 | 60539049 | .         | G | A | . | PASS | MS4A1 intrc NM_.       |              |
| ACa01 | 11 | 76062520 | .         | T | A | . | PASS | PRKRIF exo NM_ missens |              |
| ACa01 | 11 | 77614843 | .         | T | G | . | PASS | INTS4 intrc NM_.       |              |
| ACa01 | 11 | 77614844 | .         | T | G | . | PASS | INTS4 intrc NM_.       |              |
| ACa01 | 11 | 77916959 | rs7614089 | C | T | . | PASS | USP35 exo NM_ synonymr |              |
| ACa01 | 11 | 93778909 | rs1438612 | C | T | . | PASS | HEPHE exo NM_ missens  |              |
| ACa01 | 11 | 1.12E+08 | .         | G | T | . | PASS | SIK2 exo NM_ synonymr  |              |
| ACa01 | 11 | 1.24E+08 | rs7757345 | C | T | . | PASS | OR10S exo NM_ missens  |              |
| ACa01 | 11 | 1.24E+08 | rs2512286 | T | C | . | PASS | .                      |              |
| ACa01 | 12 | 68657    | rs5382343 | T | C | . | PASS | .                      |              |
| ACa01 | 12 | 88453    | rs8799828 | C | G | . | PASS | LOC10 ncR NR_.         |              |
| ACa01 | 12 | 330603   | .         | A | C | . | PASS | SLC6A1 exo NM_ missens |              |
| ACa01 | 12 | 1100428  | rs8681434 | T | C | . | PASS | ERC1 UTF NM_NV.        |              |
| ACa01 | 12 | 31353627 | rs2575282 | A | G | . | PASS | .                      |              |
| ACa01 | 12 | 41871792 | .         | G | A | . | PASS | PDZRN intrc NM_.       |              |
| ACa01 | 12 | 46589903 | .         | G | C | . | PASS | SLC38A UTF NM_NV.      |              |
| ACa01 | 12 | 51693046 | .         | C | T | . | PASS | BIN2 exo NM_ synonymr  |              |
| ACa01 | 12 | 68946858 | .         | A | C | . | PASS | .                      |              |
| ACa01 | 12 | 75700028 | .         | G | A | . | PASS | CAPS2 intrc NM_.       |              |
| ACa01 | 12 | 1.05E+08 | rs1043870 | C | T | . | PASS | CHST1 exo NM_ synonymr |              |
| ACa01 | 12 | 1.11E+08 | .         | C | T | . | PASS | CCDC6 intrc NM_.       |              |
| ACa01 | 12 | 1.2E+08  | .         | C | T | . | PASS | CIT intrc NM_.         |              |
| ACa01 | 13 | 58299300 | .         | C | A | . | PASS | PCDH1 exo NM_ missens  |              |
| ACa01 | 14 | 19475264 | .         | G | A | . | PASS | .                      |              |
| ACa01 | 14 | 19475298 | rs2014705 | C | T | . | PASS | .                      |              |
| ACa01 | 14 | 19720608 | rs8794601 | G | A | . | PASS | .                      |              |
| ACa01 | 14 | 19962075 | .         | C | T | . | PASS | .                      |              |
| ACa01 | 14 | 20145911 | rs8674109 | G | T | . | PASS | .                      |              |
| ACa01 | 14 | 20897283 | .         | C | T | . | PASS | KLHL33 exo NM_ missens |              |
| ACa01 | 14 | 22958314 | .         | A | C | . | PASS | .                      |              |
| ACa01 | 14 | 22958315 | .         | A | C | . | PASS | .                      |              |
| ACa01 | 14 | 39628570 | .         | G | A | . | PASS | TRAPP intrc NM_.       |              |
| ACa01 | 14 | 53173723 | .         | G | A | . | PASS | .                      |              |
| ACa01 | 14 | 58917202 | .         | T | G | . | PASS | KIAA05 intrc NM_.      |              |
| ACa01 | 14 | 64687233 | rs7732738 | G | A | . | PASS | SYNE2 exo NM_ missens  |              |
| ACa01 | 14 | 1.01E+08 | .         | G | T | . | PASS | WDR25 intrc NM_.       |              |
| ACa01 | 14 | 1.06E+08 | rs2897118 | C | T | . | PASS | .                      |              |

|       |    |          |           |   |   |      |                       |
|-------|----|----------|-----------|---|---|------|-----------------------|
| ACa01 | 14 | 1.06E+08 | rs3681255 | T | A | PASS | ups  NR_ . .          |
| ACa01 | 14 | 1.07E+08 | rs6199969 | T | C | PASS | inte  NR_dis .        |
| ACa01 | 15 | 20433937 | .         | C | A | PASS | inte  NON_dis .       |
| ACa01 | 15 | 20446879 | .         | T | G | PASS | inte  NON_dis .       |
| ACa01 | 15 | 20832999 | rs3749240 | G | A | PASS | inte  NR_dis .        |
| ACa01 | 15 | 21009303 | .         | C | T | PASS | inte  NR_dis .        |
| ACa01 | 15 | 22015966 | .         | C | T | PASS | CXADR ncR NR_ . .     |
| ACa01 | 15 | 22705227 | .         | C | T | PASS | GOLGA ncR NR_ . .     |
| ACa01 | 15 | 23377558 | rs7964394 | T | C | PASS | HERC2  ncR NR_ . .    |
| ACa01 | 15 | 23402623 | .         | A | G | PASS | inte  NR_dis .        |
| ACa01 | 15 | 23512812 | rs7126232 | C | T | PASS | intrc NM_ . .         |
| ACa01 | 15 | 24922007 | .         | G | A | PASS | NPAP1 exo  NM_ . .    |
| ACa01 | 15 | 25958879 | .         | G | A | PASS | ATP10A exo  NM_ . .   |
| ACa01 | 15 | 28952979 | rs7695754 | C | T | PASS | GOLGA exo  NM_ . .    |
| ACa01 | 15 | 29367166 | .         | G | A | PASS | APBA2 exo  NM_ . .    |
| ACa01 | 15 | 30874998 | .         | T | C | PASS | ULK4P2 ncR NR_ . .    |
| ACa01 | 15 | 31092738 | .         | C | A | PASS | inte  NR_dis .        |
| ACa01 | 15 | 32738450 | rs8658676 | G | A | PASS | GOLGA intrc NM_ . .   |
| ACa01 | 15 | 32738540 | .         | G | T | PASS | GOLGA intrc NM_ . .   |
| ACa01 | 15 | 40650467 | rs3683923 | G | A | PASS | DISP2 UTF NM_ NM_ . . |
| ACa01 | 15 | 62315589 | rs3741666 | G | A | PASS | VPS13C intrc NM_ . .  |
| ACa01 | 15 | 80050960 | .         | C | T | PASS | inte  NM_dis .        |
| ACa01 | 15 | 84859986 | rs5743805 | G | A | PASS | ups  NR_ . .          |
| ACa01 | 15 | 84908877 | rs1998088 | A | G | PASS | GOLGA exo  NM_ . .    |
| ACa01 | 15 | 84909416 | rs3775649 | A | G | PASS | GOLGA exo  NM_ . .    |
| ACa01 | 15 | 1.03E+08 | rs6202866 | A | G | PASS | WASH3 ncR NR_ . .     |
| ACa01 | 16 | 319032   | rs7561426 | G | A | PASS | RGS11 UTF NM_ NM_ . . |
| ACa01 | 16 | 21732577 | .         | C | T | PASS | OTOA intrc NM_ . .    |
| ACa01 | 16 | 30196569 | rs7464587 | C | T | PASS | CORO1 exo  NM_ . .    |
| ACa01 | 16 | 31091068 | .         | G | A | PASS | ZNF646 exo  NM_ . .   |
| ACa01 | 16 | 32437180 | rs2018870 | C | T | PASS | inte  NR_dis .        |
| ACa01 | 16 | 46388675 | rs4643347 | T | C | PASS | inte  NON_dis .       |
| ACa01 | 16 | 46392276 | rs4535017 | T | C | PASS | inte  NON_dis .       |
| ACa01 | 16 | 46393953 | rs2128471 | T | C | PASS | inte  NON_dis .       |
| ACa01 | 16 | 46394039 | rs2888787 | C | G | PASS | inte  NON_dis .       |
| ACa01 | 16 | 46395236 | rs4355081 | T | A | PASS | inte  NON_dis .       |
| ACa01 | 16 | 46395893 | rs4249097 | T | C | PASS | inte  NON_dis .       |
| ACa01 | 16 | 46399631 | rs4232920 | C | T | PASS | inte  NON_dis .       |
| ACa01 | 16 | 46401781 | rs7970299 | T | G | PASS | inte  NON_dis .       |
| ACa01 | 16 | 46401891 | rs1483332 | A | T | PASS | inte  NON_dis .       |
| ACa01 | 16 | 46402061 | rs9972801 | A | G | PASS | inte  NON_dis .       |
| ACa01 | 16 | 46402155 | rs2878607 | A | T | PASS | inte  NON_dis .       |
| ACa01 | 16 | 46402193 | rs4249050 | C | G | PASS | inte  NON_dis .       |
| ACa01 | 16 | 46405336 | rs4250282 | T | C | PASS | inte  NON_dis .       |
| ACa01 | 16 | 46405873 | rs7198709 | T | C | PASS | inte  NON_dis .       |
| ACa01 | 16 | 46407028 | rs4445923 | A | T | PASS | inte  NON_dis .       |
| ACa01 | 16 | 46407951 | rs4450416 | A | G | PASS | inte  NON_dis .       |
| ACa01 | 16 | 46408218 | .         | G | A | PASS | inte  NON_dis .       |
| ACa01 | 16 | 46408282 | rs8056404 | C | G | PASS | inte  NON_dis .       |
| ACa01 | 16 | 46420425 | rs8056672 | A | C | PASS | inte  NON_dis .       |
| ACa01 | 16 | 46421747 | rs6152895 | G | A | PASS | inte  NON_dis .       |
| ACa01 | 16 | 46421915 | rs2884801 | T | C | PASS | inte  NON_dis .       |
| ACa01 | 16 | 53844261 | .         | A | C | PASS | FTO intrc NM_ . .     |
| ACa01 | 16 | 67063672 | .         | C | T | PASS | CBFB exo  NM_ . .     |

|       |    |          |           |   |   |   |      |        |               |         |
|-------|----|----------|-----------|---|---|---|------|--------|---------------|---------|
| ACa01 | 16 | 70237719 | .         | C | G | . | PASS | .      | inter NM_dis  | .       |
| ACa01 | 16 | 88493891 | .         | C | T | . | PASS | ZNF469 | exon NM_      | missens |
| ACa01 | 17 | 1578542  | rs7801100 | G | A | . | PASS | PRPF8  | exon NM_      | synonym |
| ACa01 | 17 | 3343563  | .         | T | C | . | PASS | SPATA2 | exon NM_      | missens |
| ACa01 | 17 | 7814784  | rs3687584 | G | A | . | PASS | CHD3   | exon NM_      | missens |
| ACa01 | 17 | 11778655 | .         | A | C | . | PASS | DNAH9  | intron NM_    | .       |
| ACa01 | 17 | 15690511 | rs1845094 | C | T | . | PASS | MEIS3P | ncR NR_       | .       |
| ACa01 | 17 | 18045131 | .         | G | A | . | PASS | MYO15  | intron NM_    | .       |
| ACa01 | 17 | 21904565 | .         | G | T | . | PASS | FLJ360 | ncR NR_       | .       |
| ACa01 | 17 | 21906266 | .         | C | G | . | PASS | FLJ360 | ncR NR_       | .       |
| ACa01 | 17 | 21906963 | rs4503851 | G | T | . | PASS | FLJ360 | ncR NR_       | .       |
| ACa01 | 17 | 22252147 | rs1462263 | C | A | . | PASS | .      | inter NM_dis  | .       |
| ACa01 | 17 | 22253154 | rs4362423 | T | G | . | PASS | .      | inter NM_dis  | .       |
| ACa01 | 17 | 22253158 | rs6565430 | T | G | . | PASS | .      | inter NM_dis  | .       |
| ACa01 | 17 | 22253167 | rs1434103 | G | A | . | PASS | .      | inter NM_dis  | .       |
| ACa01 | 17 | 22254209 | .         | G | C | . | PASS | .      | inter NM_dis  | .       |
| ACa01 | 17 | 26348946 | rs8916657 | T | A | . | PASS | .      | inter NM_dis  | .       |
| ACa01 | 17 | 37426807 | rs1167082 | A | T | . | PASS | FBXL20 | intron NM_    | .       |
| ACa01 | 17 | 40123777 | .         | T | G | . | PASS | CNP    | intron NM_    | .       |
| ACa01 | 17 | 40762339 | rs1459625 | G | A | . | PASS | TUBG1  | intron NM_    | .       |
| ACa01 | 17 | 43663933 | rs1724395 | T | C | . | PASS | .      | inter NR_dis  | .       |
| ACa01 | 17 | 56690735 | .         | G | A | . | PASS | TEX14  | intron NM_    | .       |
| ACa01 | 17 | 66535309 | .         | T | G | . | PASS | FAM20  | intron NM_    | .       |
| ACa01 | 17 | 72522246 | .         | A | C | . | PASS | CD300L | intron NM_    | .       |
| ACa01 | 18 | 5397057  | .         | C | T | . | PASS | EPB41L | exon NM_      | synonym |
| ACa01 | 18 | 11633266 | rs5374020 | T | C | . | PASS | .      | inter NM_dis  | .       |
| ACa01 | 18 | 11644538 | rs2012257 | C | G | . | PASS | .      | inter NM_dis  | .       |
| ACa01 | 19 | 36759691 | .         | G | A | . | PASS | .      | inter NM_dis  | .       |
| ACa01 | 19 | 37785301 | rs7125437 | C | G | . | PASS | .      | inter NR_dis  | .       |
| ACa01 | 19 | 37785451 | .         | C | T | . | PASS | .      | inter NR_dis  | .       |
| ACa01 | 19 | 41631873 | .         | A | G | . | PASS | CYP2F1 | intron NM_    | .       |
| ACa01 | 19 | 42012297 | .         | G | T | . | PASS | .      | inter NR_dis  | .       |
| ACa01 | 19 | 42620764 | .         | G | A | . | PASS | POU2F2 | intron NM_    | .       |
| ACa01 | 19 | 43858238 | .         | G | A | . | PASS | CD177  | intron NM_    | .       |
| ACa01 | 19 | 49439523 | .         | G | T | . | PASS | DHDH   | intron NM_    | .       |
| ACa01 | 19 | 56538348 | .         | G | A | . | PASS | NLRP5  | exon NM_      | missens |
| ACa01 | 19 | 57522507 | rs8677343 | T | C | . | PASS | .      | inter NR_dis  | .       |
| ACa01 | 20 | 34568263 | .         | G | A | . | PASS | CNBD2  | intron NM_    | .       |
| ACa01 | 20 | 36770283 | .         | C | T | . | PASS | TGM2   | intron NM_    | .       |
| ACa01 | 21 | 9752424  | rs8795581 | C | T | . | PASS | .      | inter NON_dis | .       |
| ACa01 | 21 | 9907668  | rs8661396 | G | A | . | PASS | TEKT4F | ncR NR_       | .       |
| ACa01 | 21 | 10624265 | .         | G | T | . | PASS | .      | inter NR_dis  | .       |
| ACa01 | 21 | 11040737 | rs7532385 | G | A | . | PASS | BAGE2  | intron NM_    | .       |
| ACa01 | 21 | 11047253 | rs3737231 | A | T | . | PASS | BAGE2  | intron NM_    | .       |
| ACa01 | 21 | 11114884 | .         | G | A | . | PASS | .      | inter NM_dis  | .       |
| ACa01 | 22 | 16272032 | rs2003402 | C | A | . | PASS | POTEH  | intron NM_    | .       |
| ACa01 | 22 | 16352391 | rs2818474 | G | A | . | PASS | .      | inter NM_dis  | .       |
| ACa01 | 22 | 17976597 | rs5464921 | C | T | . | PASS | CECR2  | exon NM_      | unknown |
| ACa01 | 22 | 24621744 | rs9350299 | A | G | . | PASS | GGT5   | intron NM_    | .       |
| ACa01 | 22 | 24644673 | rs4050109 | C | G | . | PASS | .      | inter NM_dis  | .       |
| ACa01 | 22 | 24644674 | .         | T | G | . | PASS | .      | inter NM_dis  | .       |
| ACa01 | 22 | 25054076 | .         | A | C | . | PASS | POM12  | ncR NR_       | .       |
| ACa01 | 22 | 26294165 | .         | C | T | . | PASS | MYO18l | intron NM_    | .       |
| ACa01 | 22 | 29907312 | .         | A | C | . | PASS | THOC5  | intron NM_    | .       |

|       |    |          |           |   |   |   |      |                            |
|-------|----|----------|-----------|---|---|---|------|----------------------------|
| ACa01 | 22 | 30782805 | .         | G | A | . | PASS | RNF21E intrc NM_ . .       |
| ACa01 | 22 | 42536924 | rs1425675 | C | T | . | PASS | CYP2D7 ncR NR_ . .         |
| ACa01 | 22 | 46761386 | rs1054069 | G | A | . | PASS | CELSR1 intrc NM_ . .       |
| ACa01 | 22 | 46858756 | .         | G | A | . | PASS | CELSR1 intrc NM_ . .       |
| ACa01 | X  | 7811224  | rs7661994 | C | T | . | PASS | VCX UTF NM_NM_ .           |
| ACa01 | X  | 9377823  | .         | C | T | . | PASS | . inte  NM_ dis .          |
| ACa01 | X  | 25087714 | .         | T | C | . | PASS | . inte  NM_ dis .          |
| ACa01 | X  | 48888030 | .         | G | A | . | PASS | TFE3 exo  NM_ . missens    |
| ACa01 | X  | 48890958 | .         | G | A | . | PASS | TFE3 intrc NM_ . .         |
| ACa01 | X  | 49084983 | .         | C | T | . | PASS | CACNA intrc NM_ . .        |
| ACa01 | X  | 50653733 | rs7822715 | C | T | . | PASS | . ups  NM_ . .             |
| ACa01 | X  | 53112190 | rs7821690 | C | T | . | PASS | TSPYL2 exo  NM_ . synonymr |
| ACa01 | X  | 61718822 | .         | A | T | . | PASS | . inte  NO  dis .          |
| ACa01 | X  | 66789118 | .         | T | G | . | PASS | AR intrc NM_ . .           |
| ACa01 | X  | 76712110 | .         | C | T | . | PASS | . dow NM_ . .              |
| ACa01 | X  | 80064380 | .         | C | T | . | PASS | BRWD3 intrc NM_ . .        |
| ACa01 | X  | 92477284 | .         | C | T | . | PASS | . inte  NM_ dis .          |
| ACa01 | X  | 1E+08    | .         | G | A | . | PASS | CSTF2 exo  NM_ . synonymr  |
| ACa01 | X  | 1.03E+08 | rs7818697 | G | A | . | PASS | ZCCHC exo  NM_ . missens   |
| ACa01 | X  | 1.32E+08 | .         | C | T | . | PASS | HS6ST2 exo  NM_ . missens  |
| ACa01 | X  | 1.39E+08 | .         | C | T | . | PASS | MCF2 exo  NM_ . missens    |
| ACa01 | X  | 1.5E+08  | .         | C | T | . | PASS | CD99L2 intrc NM_ . .       |
| ACa01 | MT | 7830     | rs8788971 | G | A | . | PASS | . inte  NO  dis .          |
| ACa02 | 1  | 11317067 | .         | C | T | . | PASS | MTOR exo  NM_ . missens    |
| ACa02 | 1  | 11317177 | .         | C | T | . | PASS | MTOR exo  NM_ . missens    |
| ACa02 | 1  | 12898846 | rs5506852 | G | A | . | PASS | . inte  NM_ dis .          |
| ACa02 | 1  | 12921642 | rs2994093 | G | A | . | PASS | PRAME UTF NM_NM_ .         |
| ACa02 | 1  | 13413890 | .         | C | T | . | PASS | . intrc NM_ . .            |
| ACa02 | 1  | 17024409 | rs1390932 | C | T | . | PASS | ESPNP ncR NR_ . .          |
| ACa02 | 1  | 20992955 | .         | A | C | . | PASS | KIF17 intrc NM_ . .        |
| ACa02 | 1  | 52867128 | rs3686746 | G | A | . | PASS | ORC1 exo  NM_ . synonymr   |
| ACa02 | 1  | 70625174 | .         | T | C | . | PASS | LRRC4 intrc NM_ . .        |
| ACa02 | 1  | 91384072 | .         | T | C | . | PASS | ZNF644 intrc NM_ . .       |
| ACa02 | 1  | 1.11E+08 | .         | C | T | . | PASS | KCNA2 exo  NM_ . synonymr  |
| ACa02 | 1  | 1.43E+08 | rs2010827 | G | C | . | PASS | . inte  NO  dis .          |
| ACa02 | 1  | 1.43E+08 | .         | C | A | . | PASS | . inte  NO  dis .          |
| ACa02 | 1  | 1.43E+08 | rs2018849 | T | G | . | PASS | . inte  NO  dis .          |
| ACa02 | 1  | 1.43E+08 | rs3724010 | A | T | . | PASS | . inte  NR_ dis .          |
| ACa02 | 1  | 1.43E+08 | .         | T | C | . | PASS | . inte  NR_ dis .          |
| ACa02 | 1  | 1.43E+08 | rs3772379 | G | C | . | PASS | . inte  NR_ dis .          |
| ACa02 | 1  | 1.44E+08 | rs8799699 | G | A | . | PASS | NBPF2C intrc NM_ . .       |
| ACa02 | 1  | 1.45E+08 | .         | C | A | . | PASS | NBPF9 intrc NM_ . .        |
| ACa02 | 1  | 1.45E+08 | .         | A | C | . | PASS | NBPF8 intrc NM_ . .        |
| ACa02 | 1  | 1.45E+08 | rs4649849 | A | G | . | PASS | NBPF9 intrc NM_ . .        |
| ACa02 | 1  | 1.45E+08 | rs8799650 | A | C | . | PASS | NBPF2E ncR NR_ . .         |
| ACa02 | 1  | 1.45E+08 | rs7668601 | C | G | . | PASS | NBPF2E ncR NR_ . .         |
| ACa02 | 1  | 1.45E+08 | rs7823737 | C | T | . | PASS | NBPF2E ncR NR_ . .         |
| ACa02 | 1  | 1.48E+08 | .         | C | T | . | PASS | NBPF8 intrc NM_ . .        |
| ACa02 | 1  | 1.48E+08 | rs2003436 | G | A | . | PASS | NBPF8 intrc NM_ . .        |
| ACa02 | 1  | 1.48E+08 | rs6181174 | G | A | . | PASS | NBPF8 intrc NM_ . .        |
| ACa02 | 1  | 1.48E+08 | rs6181174 | G | A | . | PASS | NBPF8 intrc NM_ . .        |
| ACa02 | 1  | 1.73E+08 | .         | A | C | . | PASS | LOC10C ncR NR_ . .         |
| ACa02 | 1  | 1.75E+08 | rs7494818 | C | T | . | PASS | TNR exo  NM_ . missens     |
| ACa02 | 1  | 1.79E+08 | .         | C | T | . | PASS | SOAT1 intrc NM_ . .        |

|       |   |          |           |   |   |   |      |                         |
|-------|---|----------|-----------|---|---|---|------|-------------------------|
| ACa02 | 1 | 1.79E+08 | rs8790889 | C | A | . | PASS | AXDND intrc NM_ . .     |
| ACa02 | 1 | 2.2E+08  | .         | G | T | . | PASS | RNU5F- ncR NR_ . .      |
| ACa02 | 1 | 2.28E+08 | .         | G | A | . | PASS | ZNF678 intrc NM_ . .    |
| ACa02 | 1 | 2.28E+08 | .         | A | G | . | PASS | . inte  NM_ dis .       |
| ACa02 | 1 | 2.41E+08 | .         | C | A | . | PASS | RGS7 intrc NM_ . .      |
| ACa02 | 2 | 24920686 | .         | A | G | . | PASS | NCOA1 intrc NM_ . .     |
| ACa02 | 2 | 87581132 | rs1020943 | C | A | . | PASS | . inte  NR_ dis .       |
| ACa02 | 2 | 91836143 | .         | C | T | . | PASS | LOC654 ncR NR_ . .      |
| ACa02 | 2 | 91896050 | rs2004118 | A | T | . | PASS | . inte  NR_ dis .       |
| ACa02 | 2 | 96561474 | rs2021466 | A | T | . | PASS | . inte  NR_ dis .       |
| ACa02 | 2 | 97875309 | rs3694799 | T | C | . | PASS | ANKRD intrc NM_ . .     |
| ACa02 | 2 | 1.08E+08 | rs5416674 | G | A | . | PASS | RGPD4 exo  NM_ missens  |
| ACa02 | 2 | 1.09E+08 | rs1053772 | A | C | . | PASS | LIMS1 intrc NM_ . .     |
| ACa02 | 2 | 1.14E+08 | .         | C | T | . | PASS | WASH2 ncR NR_ . .       |
| ACa02 | 2 | 1.32E+08 | rs5382277 | C | T | . | PASS | RNU6-8 ncR NR_ . .      |
| ACa02 | 2 | 1.61E+08 | .         | G | C | . | PASS | 7-Mar intrc NM_ . .     |
| ACa02 | 2 | 1.7E+08  | rs1875087 | G | A | . | PASS | BBS5 intrc NM_ . .      |
| ACa02 | 2 | 1.8E+08  | .         | G | T | . | PASS | TTN exo  NM_ missens    |
| ACa02 | 2 | 2.04E+08 | .         | A | G | . | PASS | CARF intrc NM_ . .      |
| ACa02 | 2 | 2.16E+08 | .         | T | C | . | PASS | ATIC UTF NM_ NM .       |
| ACa02 | 2 | 2.28E+08 | rs1509794 | C | T | . | PASS | COL4A2 exo  NM_ missens |
| ACa02 | 2 | 2.34E+08 | .         | C | T | . | PASS | NGEF exo  NM_ missens   |
| ACa02 | 2 | 2.43E+08 | rs7970263 | T | C | . | PASS | . inte  NR_ dis .       |
| ACa02 | 3 | 4733029  | .         | G | A | . | PASS | ITPR1 spli  NM_ NM .    |
| ACa02 | 3 | 31677754 | .         | G | A | . | PASS | . UTF NM_ NM .          |
| ACa02 | 3 | 49723881 | rs6777426 | G | C | . | PASS | MST1 exo  NM_ missens   |
| ACa02 | 3 | 49724014 | rs6779963 | G | A | . | PASS | MST1 intrc NM_ . .      |
| ACa02 | 3 | 69225746 | rs5472981 | G | A | . | PASS | FRMD4  exo  NM_ unknow  |
| ACa02 | 3 | 69988398 | .         | C | T | . | PASS | MITF intrc NM_ . .      |
| ACa02 | 3 | 1.25E+08 | .         | C | G | . | PASS | . inte  NM_ dis .       |
| ACa02 | 3 | 1.79E+08 | rs1219132 | G | A | . | PASS | PIK3CA exo  NM_ missens |
| ACa02 | 3 | 1.79E+08 | .         | C | G | . | PASS | MFN1 intrc NM_ . .      |
| ACa02 | 3 | 1.91E+08 | .         | A | G | . | PASS | GMNC exo  NM_ synonymr  |
| ACa02 | 3 | 1.95E+08 | .         | G | T | . | PASS | . ncR NR_ . .           |
| ACa02 | 3 | 1.97E+08 | rs4857535 | A | G | . | PASS | LOC22C ncR NR_ . .      |
| ACa02 | 4 | 1230342  | .         | C | T | . | PASS | CTBP1 intrc NM_ . .     |
| ACa02 | 4 | 9212542  | .         | G | T | . | PASS | USP17L exo  NM_ missens |
| ACa02 | 4 | 9241015  | .         | G | T | . | PASS | . inte  NM_ dis .       |
| ACa02 | 4 | 9245326  | rs7961122 | C | G | . | PASS | . ups  NM_ . .          |
| ACa02 | 4 | 39328028 | .         | C | T | . | PASS | MIR127 ncR NR_ . .      |
| ACa02 | 4 | 49539207 | .         | A | G | . | PASS | . inte  NM_ dis .       |
| ACa02 | 4 | 54794073 | .         | G | A | . | PASS | . inte  NR_ dis .       |
| ACa02 | 4 | 81123234 | rs3705413 | C | T | . | PASS | PRDM8 exo  NM_ synonymr |
| ACa02 | 4 | 1E+08    | .         | C | T | . | PASS | ADH1C exo  NM_ unknow   |
| ACa02 | 4 | 1.04E+08 | .         | T | C | . | PASS | SLC9B2 UTF NM_ NM .     |
| ACa02 | 4 | 1.14E+08 | .         | G | A | . | PASS | ANK2 intrc NM_ . .      |
| ACa02 | 4 | 1.45E+08 | rs2016625 | T | G | . | PASS | GYPB exo  NM_ missens   |
| ACa02 | 4 | 1.77E+08 | .         | G | A | . | PASS | WDR17 intrc NM_ . .     |
| ACa02 | 4 | 1.89E+08 | rs7619626 | C | T | . | PASS | ZFP42 exo  NM_ synonymr |
| ACa02 | 5 | 7301667  | rs8684061 | C | G | . | PASS | LOC442 ncR NR_ . .      |
| ACa02 | 5 | 14692852 | .         | C | T | . | PASS | OTULIN intrc NM_ . .    |
| ACa02 | 5 | 17527667 | .         | G | A | . | PASS | . inte  NR_ dis .       |
| ACa02 | 5 | 34182503 | .         | G | A | . | PASS | . inte  NR_ dis .       |
| ACa02 | 5 | 49410264 | rs8659304 | A | G | . | PASS | . inte  NO  dis .       |



|       |   |          |           |   |   |   |      |        |                    |
|-------|---|----------|-----------|---|---|---|------|--------|--------------------|
| ACa02 | 5 | 49437291 | rs1335780 | A | C | . | PASS | .      | inte NON dis.      |
| ACa02 | 5 | 49440809 | rs1483787 | G | C | . | PASS | .      | inte NON dis.      |
| ACa02 | 5 | 63802402 | .         | C | A | . | PASS | RGS7BI | UTF NM_ NV.        |
| ACa02 | 5 | 79598356 | rs1416874 | T | G | . | PASS | .      | inte NR_ dis.      |
| ACa02 | 5 | 1.48E+08 | .         | G | A | . | PASS | SH3TC2 | intrc NM_ .        |
| ACa02 | 5 | 1.69E+08 | rs7284112 | G | A | . | PASS | DOCK2  | intrc NM_ .        |
| ACa02 | 5 | 1.79E+08 | rs1829546 | C | A | . | PASS | MAML1  | intrc NM_ .        |
| ACa02 | 6 | 31948477 | rs7743469 | A | G | . | PASS | STK19  | exo NM_ . synonymr |
| ACa02 | 6 | 31973462 | rs1403232 | T | C | . | PASS | CYP21A | ncR NR_ .          |
| ACa02 | 6 | 39278875 | rs7596914 | C | T | . | PASS | KCNK17 | intrc NM_ .        |
| ACa02 | 6 | 58778766 | rs4928651 | T | A | . | PASS | .      | inte NR_ dis.      |
| ACa02 | 6 | 1.17E+08 | .         | G | T | . | PASS | DSE    | exo NM_ . stopgair |
| ACa02 | 7 | 1518653  | .         | A | C | . | PASS | INTS1  | intrc NM_ .        |
| ACa02 | 7 | 37890219 | rs7467237 | A | G | . | PASS | NME8   | intrc NM_ .        |
| ACa02 | 7 | 45123761 | rs7762925 | C | T | . | PASS | NACAD  | exo NM_ . missens  |
| ACa02 | 7 | 55826532 | .         | G | T | . | PASS | .      | inte NR_ dis.      |
| ACa02 | 7 | 56887905 | .         | A | G | . | PASS | .      | inte NR_ dis.      |
| ACa02 | 7 | 57082051 | rs1422600 | C | T | . | PASS | .      | inte NR_ dis.      |
| ACa02 | 7 | 61969020 | rs4460255 | G | C | . | PASS | .      | inte NON dis.      |
| ACa02 | 7 | 63210111 | .         | C | A | . | PASS | .      | inte NR_ dis.      |
| ACa02 | 7 | 63212664 | rs3740384 | G | A | . | PASS | .      | inte NR_ dis.      |
| ACa02 | 7 | 63213718 | rs8672068 | G | A | . | PASS | .      | inte NR_ dis.      |
| ACa02 | 7 | 63214682 | .         | C | G | . | PASS | .      | inte NR_ dis.      |
| ACa02 | 7 | 63219127 | .         | G | A | . | PASS | .      | inte NR_ dis.      |
| ACa02 | 7 | 63222486 | .         | G | T | . | PASS | .      | inte NR_ dis.      |
| ACa02 | 7 | 72604281 | rs5541523 | C | T | . | PASS | GTF2IP | ncR NR_ .          |
| ACa02 | 7 | 1.02E+08 | rs3757000 | T | C | . | PASS | .      | inte NM_ dis.      |
| ACa02 | 7 | 1.13E+08 | .         | A | G | . | PASS | GPR85  | exo NM_ . synonymr |
| ACa02 | 7 | 1.51E+08 | .         | T | G | . | PASS | SLC4A2 | intrc NM_ .        |
| ACa02 | 7 | 1.51E+08 | .         | T | G | . | PASS | ABCF2  | intrc NM_ .        |
| ACa02 | 7 | 1.51E+08 | .         | T | G | . | PASS | ABCF2  | intrc NM_ .        |
| ACa02 | 7 | 1.58E+08 | rs8681384 | G | C | . | PASS | PTPRN  | intrc NM_ .        |
| ACa02 | 8 | 1678575  | .         | C | T | . | PASS | .      | inte NM_ dis.      |
| ACa02 | 8 | 7461251  | rs3989791 | C | G | . | PASS | .      | inte NR_ dis.      |
| ACa02 | 8 | 7468906  | .         | G | A | . | PASS | .      | inte NR_ dis.      |
| ACa02 | 8 | 10467390 | rs7469289 | G | A | . | PASS | RP1L1  | exo NM_ . synonymr |
| ACa02 | 8 | 12272503 | rs7595500 | C | G | . | PASS | FAM907 | ncR NR_ .          |
| ACa02 | 8 | 12584753 | .         | G | A | . | PASS | MIR392 | ncR NR_ .          |
| ACa02 | 8 | 17125921 | .         | G | T | . | PASS | VPS37A | intrc NM_ .        |
| ACa02 | 8 | 46841804 | .         | G | C | . | PASS | .      | inte NON dis.      |
| ACa02 | 8 | 46849744 | rs4440644 | C | T | . | PASS | .      | inte NON dis.      |
| ACa02 | 8 | 81599998 | .         | G | T | . | PASS | ZNF704 | intrc NM_ .        |
| ACa02 | 8 | 1.14E+08 | .         | G | A | . | PASS | CSMD3  | intrc NM_ .        |
| ACa02 | 8 | 1.44E+08 | .         | C | T | . | PASS | LY6H   | intrc NM_ .        |
| ACa02 | 9 | 19596939 | rs5356927 | G | A | . | PASS | SLC24A | intrc NM_ .        |
| ACa02 | 9 | 37015284 | rs5620843 | C | T | . | PASS | PAX5   | intrc NM_ .        |
| ACa02 | 9 | 39085808 | rs1412360 | T | C | . | PASS | CNTNA  | exo NM_ . missens  |
| ACa02 | 9 | 41954395 | rs3755065 | C | A | . | PASS | GLIDR  | ncR NR_ .          |
| ACa02 | 9 | 41955952 | rs5368523 | T | A | . | PASS | .      | ups NR_ .          |
| ACa02 | 9 | 66499856 | rs7792676 | G | T | . | PASS | PTGER  | ncR NR_ .          |
| ACa02 | 9 | 66500520 | rs1968548 | C | A | . | PASS | PTGER  | ncR NR_ .          |
| ACa02 | 9 | 68438589 | rs6254382 | A | G | . | PASS | LOC642 | ncR NR_ .          |
| ACa02 | 9 | 92995229 | .         | G | T | . | PASS | .      | inte NR_ dis.      |
| ACa02 | 9 | 1.23E+08 | rs5781745 | G | A | . | PASS | .      | inte NM_ dis.      |

|       |    |          |           |   |   |   |      |        |       |        |   |          |
|-------|----|----------|-----------|---|---|---|------|--------|-------|--------|---|----------|
| ACa02 | 9  | 1.36E+08 | .         | G | A | . | PASS | RALGD  | intrc | NM_    | . | .        |
| ACa02 | 9  | 1.41E+08 | .         | G | A | . | PASS | CACNA  | exo   | NM_    | . | missens  |
| ACa02 | 10 | 16962027 | rs7660547 | C | T | . | PASS | CUBN   | exo   | NM_    | . | synonyr  |
| ACa02 | 10 | 22006660 | rs1930137 | C | T | . | PASS | MLLT1C | intrc | NM_    | . | .        |
| ACa02 | 10 | 43326310 | .         | T | G | . | PASS | BMS1   | splic | NM_NM  | . | .        |
| ACa02 | 10 | 47405478 | rs7819664 | T | A | . | PASS | FAM35L | ncR   | NR_    | . | .        |
| ACa02 | 10 | 51470151 | rs6185008 | G | C | . | PASS | TIMM23 | intrc | NM_    | . | .        |
| ACa02 | 10 | 75451923 | .         | T | A | . | PASS | AGAP5  | intrc | NM_    | . | .        |
| ACa02 | 10 | 81606558 | .         | G | A | . | PASS | .      | inte  | NR_dis | . | .        |
| ACa02 | 10 | 1.02E+08 | .         | C | T | . | PASS | PKD2L1 | intrc | NM_    | . | .        |
| ACa02 | 10 | 1.2E+08  | rs2928119 | C | G | . | PASS | RAB11F | intrc | NM_    | . | .        |
| ACa02 | 10 | 1.3E+08  | .         | C | G | . | PASS | .      | inte  | NR_dis | . | .        |
| ACa02 | 10 | 1.35E+08 | rs1021891 | C | T | . | PASS | SCART  | ncR   | NR_    | . | .        |
| ACa02 | 11 | 1092858  | rs6263724 | A | C | . | PASS | MUC2   | exo   | NM_    | . | synonyr  |
| ACa02 | 11 | 1277292  | rs1494932 | T | C | . | PASS | MUC5B  | intrc | NM_    | . | .        |
| ACa02 | 11 | 8715859  | .         | T | G | . | PASS | ST5    | intrc | NM_    | . | .        |
| ACa02 | 11 | 9406464  | .         | G | A | . | PASS | IPO7   | intrc | NM_    | . | .        |
| ACa02 | 11 | 44125218 | .         | G | A | . | PASS | EXT2   | intrc | NM_    | . | .        |
| ACa02 | 11 | 61310123 | .         | G | A | . | PASS | SYT7   | intrc | NM_    | . | .        |
| ACa02 | 11 | 64006105 | rs9265024 | G | C | . | PASS | VEGFB  | UTF   | NM_NM  | . | .        |
| ACa02 | 11 | 64899489 | .         | T | C | . | PASS | SYVN1  | intrc | NM_    | . | .        |
| ACa02 | 11 | 66034763 | .         | C | T | . | PASS | KLC2   | UTF   | NM_NM  | . | .        |
| ACa02 | 11 | 67140900 | .         | G | A | . | PASS | LOC10C | ncR   | NR_    | . | .        |
| ACa02 | 11 | 72406877 | rs3679844 | G | A | . | PASS | ARAP1  | exo   | NM_    | . | synonyr  |
| ACa02 | 11 | 72409035 | .         | G | A | . | PASS | ARAP1  | exo   | NM_    | . | synonyr  |
| ACa02 | 11 | 75154422 | .         | C | A | . | PASS | GDPD5  | intrc | NM_    | . | .        |
| ACa02 | 11 | 76901624 | rs3831451 | A | G | . | PASS | MYO7A  | intrc | NM_    | . | .        |
| ACa02 | 11 | 77698429 | .         | A | T | . | PASS | INTS4  | intrc | NM_    | . | .        |
| ACa02 | 11 | 1.05E+08 | .         | C | T | . | PASS | .      | inte  | NM_dis | . | .        |
| ACa02 | 11 | 1.17E+08 | rs1441056 | C | T | . | PASS | BACE1  | intrc | NM_    | . | .        |
| ACa02 | 11 | 1.24E+08 | rs5379167 | G | T | . | PASS | OR8B8  | exo   | NM_    | . | missens  |
| ACa02 | 11 | 1.34E+08 | .         | T | C | . | PASS | .      | inte  | NM_dis | . | .        |
| ACa02 | 12 | 93080    | rs1482401 | C | G | . | PASS | .      | inte  | NR_dis | . | .        |
| ACa02 | 12 | 3047379  | .         | T | A | . | PASS | TULP3  | exo   | NM_    | . | missens  |
| ACa02 | 12 | 9707317  | rs2005141 | T | C | . | PASS | .      | inte  | NR_dis | . | .        |
| ACa02 | 12 | 27066602 | .         | G | A | . | PASS | ASUN   | exo   | NM_    | . | synonyr  |
| ACa02 | 12 | 57011270 | .         | T | C | . | PASS | BAZ2A  | exo   | NM_    | . | synonyr  |
| ACa02 | 12 | 57396918 | rs3737629 | G | A | . | PASS | ZBTB39 | exo   | NM_    | . | missens  |
| ACa02 | 12 | 80604519 | .         | C | T | . | PASS | OTOGL  | intrc | NM_    | . | .        |
| ACa02 | 12 | 82147793 | .         | G | A | . | PASS | PPFIA2 | exo   | NM_    | . | stopgair |
| ACa02 | 12 | 1.02E+08 | .         | C | G | . | PASS | .      | inte  | NM_dis | . | .        |
| ACa02 | 12 | 1.08E+08 | .         | C | T | . | PASS | BTBD11 | exo   | NM_    | . | missens  |
| ACa02 | 12 | 1.11E+08 | .         | G | A | . | PASS | PPTC7  | intrc | NM_    | . | .        |
| ACa02 | 12 | 1.11E+08 | rs3495666 | A | G | . | PASS | PPTC7  | intrc | NM_    | . | .        |
| ACa02 | 12 | 1.18E+08 | .         | G | C | . | PASS | NOS1   | intrc | NM_    | . | .        |
| ACa02 | 12 | 1.25E+08 | .         | C | G | . | PASS | NCOR2  | exo   | NM_    | . | missens  |
| ACa02 | 13 | 31035409 | .         | A | G | . | PASS | HMGB1  | UTF   | NM_NM  | . | .        |
| ACa02 | 13 | 42352245 | .         | A | C | . | PASS | VWA8   | intrc | NM_    | . | .        |
| ACa02 | 13 | 44621118 | rs3772091 | T | C | . | PASS | .      | inte  | NR_dis | . | .        |
| ACa02 | 13 | 78236166 | .         | G | T | . | PASS | .      | inte  | NM_dis | . | .        |
| ACa02 | 13 | 1.03E+08 | .         | C | G | . | PASS | TPP2   | intrc | NM_    | . | .        |
| ACa02 | 14 | 19806361 | rs2259899 | C | A | . | PASS | .      | inte  | NR_dis | . | .        |
| ACa02 | 14 | 20444114 | rs7532438 | G | A | . | PASS | OR4K1  | exo   | NM_    | . | missens  |
| ACa02 | 14 | 22386739 | .         | T | A | . | PASS | .      | inte  | NM_dis | . | .        |

|       |    |          |           |   |   |   |      |                    |              |
|-------|----|----------|-----------|---|---|---|------|--------------------|--------------|
| ACa02 | 14 | 23573949 | .         | G | T | . | PASS | .                  | inte NM_dis. |
| ACa02 | 14 | 50559357 | .         | T | C | . | PASS | C14orf1 exo NM_.   | missens      |
| ACa02 | 14 | 73572961 | .         | G | C | . | PASS | RBM25 exo NM_.     | missens      |
| ACa02 | 14 | 75052544 | .         | G | A | . | PASS | LTBP2 intrc NM_.   | .            |
| ACa02 | 14 | 1.01E+08 | .         | A | C | . | PASS | SLC25A intrc NM_.  | .            |
| ACa02 | 14 | 1.01E+08 | rs9310230 | C | T | . | PASS | MEG3 ncR NR_.      | .            |
| ACa02 | 14 | 1.04E+08 | .         | C | T | . | PASS | TRMT6 intrc NM_.   | .            |
| ACa02 | 15 | 21195945 | rs2259724 | A | G | . | PASS | LINC01 ncR NR_NR_. | .            |
| ACa02 | 15 | 30850293 | rs2648130 | G | T | . | PASS | .                  | inte NM_dis. |
| ACa02 | 15 | 31089768 | rs2015085 | C | A | . | PASS | .                  | inte NR_dis. |
| ACa02 | 15 | 32607256 | rs2007357 | A | G | . | PASS | .                  | inte NM_dis. |
| ACa02 | 15 | 33927852 | .         | C | A | . | PASS | RYR3 exo NM_.      | unknow       |
| ACa02 | 15 | 41193053 | .         | A | G | . | PASS | VPS18 exo NM_.     | synonyr      |
| ACa02 | 15 | 48529260 | .         | G | A | . | PASS | SLC12A intrc NM_.  | .            |
| ACa02 | 15 | 63481764 | .         | C | T | . | PASS | RAB8B UTF NM_NV_.  | .            |
| ACa02 | 15 | 72493057 | .         | C | T | . | PASS | PKM intrc NM_.     | .            |
| ACa02 | 15 | 73418657 | .         | C | A | . | PASS | NEO1 intrc NM_.    | .            |
| ACa02 | 15 | 75561115 | .         | C | T | . | PASS | GOLGA intrc NM_.   | .            |
| ACa02 | 15 | 76077724 | rs1401448 | T | C | . | PASS | .                  | inte NR_dis. |
| ACa02 | 15 | 76763454 | rs8788873 | C | A | . | PASS | SCAPE1 intrc NM_.  | .            |
| ACa02 | 15 | 84859111 | rs2870850 | G | A | . | PASS | .                  | inte NM_dis. |
| ACa02 | 15 | 92397621 | .         | C | T | . | PASS | SLCO3 intrc NM_.   | .            |
| ACa02 | 15 | 1.01E+08 | rs7724699 | C | T | . | PASS | ADAMT exo NM_.     | synonyr      |
| ACa02 | 15 | 1.03E+08 | .         | G | A | . | PASS | WASH3 ncR NR_.     | .            |
| ACa02 | 16 | 15032227 | rs7760391 | C | T | . | PASS | NPIPA1 intrc NM_.  | .            |
| ACa02 | 16 | 15744027 | .         | C | G | . | PASS | NDE1 intrc NM_.    | .            |
| ACa02 | 16 | 30674106 | .         | G | A | . | PASS | .                  | inte NM_dis. |
| ACa02 | 16 | 30750888 | .         | C | T | . | PASS | SRCAP exo NM_.     | missens      |
| ACa02 | 16 | 32265903 | rs2111615 | A | G | . | PASS | TP53TC intrc NM_.  | .            |
| ACa02 | 16 | 32265931 | rs1123661 | T | C | . | PASS | TP53TC intrc NM_.  | .            |
| ACa02 | 16 | 34569998 | .         | C | A | . | PASS | .                  | inte NR_dis. |
| ACa02 | 16 | 34877417 | rs5547762 | C | T | . | PASS | .                  | inte NR_dis. |
| ACa02 | 16 | 35141389 | rs3718897 | C | T | . | PASS | .                  | inte NR_dis. |
| ACa02 | 16 | 46388964 | rs4967312 | G | T | . | PASS | .                  | inte NO dis. |
| ACa02 | 16 | 46391668 | rs4270195 | G | C | . | PASS | .                  | inte NO dis. |
| ACa02 | 16 | 46391690 | rs4347658 | A | T | . | PASS | .                  | inte NO dis. |
| ACa02 | 16 | 46393134 | rs4246399 | T | C | . | PASS | .                  | inte NO dis. |
| ACa02 | 16 | 46398753 | rs5908263 | A | G | . | PASS | .                  | inte NO dis. |
| ACa02 | 16 | 46401863 | rs4249045 | T | C | . | PASS | .                  | inte NO dis. |
| ACa02 | 16 | 46401949 | rs7188365 | G | T | . | PASS | .                  | inte NO dis. |
| ACa02 | 16 | 46402193 | rs4249050 | C | G | . | PASS | .                  | inte NO dis. |
| ACa02 | 16 | 46404687 | rs4505355 | C | T | . | PASS | .                  | inte NO dis. |
| ACa02 | 16 | 46404715 | rs1244825 | T | G | . | PASS | .                  | inte NO dis. |
| ACa02 | 16 | 46405534 | rs1393031 | A | G | . | PASS | .                  | inte NO dis. |
| ACa02 | 16 | 46405934 | rs5614462 | A | C | . | PASS | .                  | inte NO dis. |
| ACa02 | 16 | 46407482 | rs4967197 | T | G | . | PASS | .                  | inte NO dis. |
| ACa02 | 16 | 46407951 | rs4450416 | A | G | . | PASS | .                  | inte NO dis. |
| ACa02 | 16 | 46408282 | rs8056404 | C | G | . | PASS | .                  | inte NO dis. |
| ACa02 | 16 | 46408483 | rs4246356 | C | T | . | PASS | .                  | inte NO dis. |
| ACa02 | 16 | 46408518 | rs8052624 | G | T | . | PASS | .                  | inte NO dis. |
| ACa02 | 16 | 46408534 | rs4249654 | A | T | . | PASS | .                  | inte NO dis. |
| ACa02 | 16 | 46413328 | rs2885782 | G | T | . | PASS | .                  | inte NO dis. |
| ACa02 | 16 | 46413340 | rs6153388 | C | T | . | PASS | .                  | inte NO dis. |
| ACa02 | 16 | 46413364 | .         | G | C | . | PASS | .                  | inte NO dis. |

|       |    |          |           |   |   |   |      |        |          |         |
|-------|----|----------|-----------|---|---|---|------|--------|----------|---------|
| ACa02 | 16 | 46420361 | rs2875315 | T | C | . | PASS | .      | inte NON | dis.    |
| ACa02 | 16 | 46423135 | .         | G | A | . | PASS | .      | inte NON | dis.    |
| ACa02 | 16 | 46433334 | rs1479181 | C | G | . | PASS | .      | inte NON | dis.    |
| ACa02 | 16 | 46433422 | rs8677676 | C | T | . | PASS | .      | inte NON | dis.    |
| ACa02 | 16 | 70917747 | .         | C | G | . | PASS | HYDIN  | intrc    | NM_.    |
| ACa02 | 16 | 72094757 | rs1891151 | G | C | . | PASS | HP     | exo NM_. | missens |
| ACa02 | 16 | 72097225 | rs1291890 | T | C | . | PASS | HPR    | intrc    | NM_.    |
| ACa02 | 16 | 76389509 | .         | G | T | . | PASS | CNTNA  | intrc    | NM_.    |
| ACa02 | 16 | 89167385 | .         | C | A | . | PASS | ACSF3  | exo NM_. | missens |
| ACa02 | 16 | 89167409 | rs7697160 | C | T | . | PASS | ACSF3  | exo NM_. | missens |
| ACa02 | 16 | 90229186 | rs7945920 | C | A | . | PASS | .      | ncR      | NR_.    |
| ACa02 | 16 | 90234858 | rs3697515 | C | A | . | PASS | .      | ncR      | NR_.    |
| ACa02 | 16 | 90234879 | rs5596034 | A | G | . | PASS | .      | ncR      | NR_.    |
| ACa02 | 17 | 6663752  | .         | G | A | . | PASS | XAF1   | exo NM_. | missens |
| ACa02 | 17 | 7164992  | .         | A | C | . | PASS | CLDN7  | intrc    | NM_.    |
| ACa02 | 17 | 7818722  | .         | C | T | . | PASS | LOC284 | ncR      | NR_.    |
| ACa02 | 17 | 10263519 | .         | G | A | . | PASS | MYH13  | intrc    | NM_.    |
| ACa02 | 17 | 11584352 | rs9806119 | C | T | . | PASS | DNAH9  | intrc    | NM_.    |
| ACa02 | 17 | 11725588 | rs7571703 | C | T | . | PASS | DNAH9  | intrc    | NM_.    |
| ACa02 | 17 | 16649883 | rs1460005 | T | A | . | PASS | CCDC1  | intrc    | NM_.    |
| ACa02 | 17 | 18365605 | rs2168782 | A | G | . | PASS | .      | inte NR_ | dis.    |
| ACa02 | 17 | 21906266 | .         | C | G | . | PASS | FLJ360 | (ncR     | NR_.    |
| ACa02 | 17 | 22253154 | rs4362423 | T | G | . | PASS | .      | inte NM_ | dis.    |
| ACa02 | 17 | 22253204 | rs4283255 | A | G | . | PASS | .      | inte NM_ | dis.    |
| ACa02 | 17 | 22260691 | rs1403689 | T | G | . | PASS | .      | inte NM_ | dis.    |
| ACa02 | 17 | 22260798 | rs1405621 | C | T | . | PASS | .      | inte NM_ | dis.    |
| ACa02 | 17 | 25982780 | .         | G | C | . | PASS | .      | inte NM_ | dis.    |
| ACa02 | 17 | 34585231 | rs7126069 | C | T | . | PASS | TBC1D  | intrc    | NM_.    |
| ACa02 | 17 | 36349205 | rs573849  | T | C | . | PASS | .      | ups NM_. | .       |
| ACa02 | 17 | 36350145 | rs9693530 | T | A | . | PASS | .      | inte NM_ | dis.    |
| ACa02 | 17 | 36371573 | .         | T | A | . | PASS | LOC44  | ncR      | NR_.    |
| ACa02 | 17 | 36498855 | .         | C | G | . | PASS | GPR17  | intrc    | NM_.    |
| ACa02 | 17 | 50235479 | .         | G | A | . | PASS | CA10   | UTF      | NM_NM.  |
| ACa02 | 17 | 60347096 | rs7516213 | G | T | . | PASS | TBC1D  | ncR      | NR_.    |
| ACa02 | 17 | 63533091 | rs7607356 | G | A | . | PASS | AXIN2  | exo NM_. | synonyr |
| ACa02 | 17 | 75187303 | .         | C | T | . | PASS | SEC14L | exo NM_. | missens |
| ACa02 | 17 | 77166111 | .         | G | A | . | PASS | RBFOX  | intrc    | NM_.    |
| ACa02 | 17 | 79005358 | rs1138327 | C | T | . | PASS | BAIAP2 | ncR      | NR_.    |
| ACa02 | 17 | 80735912 | rs8791354 | A | T | . | PASS | TBCD   | intrc    | NM_.    |
| ACa02 | 18 | 99943    | .         | G | C | . | PASS | .      | inte NR_ | dis.    |
| ACa02 | 18 | 14143809 | rs8658406 | G | A | . | PASS | .      | inte NM_ | dis.    |
| ACa02 | 18 | 14143811 | rs8676712 | C | T | . | PASS | .      | inte NM_ | dis.    |
| ACa02 | 19 | 1397560  | .         | C | A | . | PASS | GAMT   | intrc    | NM_.    |
| ACa02 | 19 | 2389762  | rs3756184 | G | A | . | PASS | .      | ups NM_. | .       |
| ACa02 | 19 | 2785626  | .         | G | A | . | PASS | THOP1  | UTF      | NM_NM.  |
| ACa02 | 19 | 2785627  | .         | G | T | . | PASS | THOP1  | UTF      | NM_NM.  |
| ACa02 | 19 | 7621418  | rs5460066 | G | A | . | PASS | PNPLA  | exo NM_. | missens |
| ACa02 | 19 | 15063677 | .         | T | C | . | PASS | SLC1A  | intrc    | NM_.    |
| ACa02 | 19 | 33870095 | .         | C | T | . | PASS | CEBPG  | UTF      | NM_NM.  |
| ACa02 | 19 | 36270883 | .         | G | A | . | PASS | ARHGA  | intrc    | NM_.    |
| ACa02 | 19 | 37772012 | rs2385185 | G | C | . | PASS | .      | inte NR_ | dis.    |
| ACa02 | 19 | 37785301 | rs7125437 | C | G | . | PASS | .      | inte NR_ | dis.    |
| ACa02 | 19 | 39026511 | .         | G | C | . | PASS | RYR1   | intrc    | NM_.    |
| ACa02 | 19 | 41531320 | rs1390553 | T | A | . | PASS | .      | inte NM_ | dis.    |

|       |    |          |           |   |   |   |      |        |         |     |          |
|-------|----|----------|-----------|---|---|---|------|--------|---------|-----|----------|
| ACa02 | 19 | 52249443 | rs7714460 | G | A | . | PASS | FPR1   | exon    | NM_ | missens  |
| ACa02 | 19 | 53945837 | rs1785512 | T | C | . | PASS | TPM3P1 | ncR     | NR_ | .        |
| ACa02 | 19 | 55032858 | rs9207323 | G | A | . | PASS | .      | intron  | NM_ | dis.     |
| ACa02 | 20 | 17605301 | .         | T | G | . | PASS | RRBP1  | exon    | NM_ | missens  |
| ACa02 | 20 | 23168959 | .         | G | A | . | PASS | .      | intron  | NR_ | dis.     |
| ACa02 | 20 | 25003624 | rs7787265 | G | A | . | PASS | ACSS1  | exon    | NM_ | synonym  |
| ACa02 | 20 | 25003759 | rs3775467 | G | A | . | PASS | ACSS1  | intron  | NM_ | .        |
| ACa02 | 20 | 29612803 | .         | C | T | . | PASS | FRG1B  | ncR     | NR_ | .        |
| ACa02 | 20 | 42144110 | .         | C | A | . | PASS | L3MBTL | intron  | NM_ | .        |
| ACa02 | 20 | 44511079 | .         | G | A | . | PASS | ZSWIM1 | intron  | NM_ | .        |
| ACa02 | 20 | 61870764 | .         | G | A | . | PASS | BIRC7  | exon    | NM_ | missens  |
| ACa02 | 21 | 9674240  | rs3747993 | C | G | . | PASS | .      | intron  | NON | dis.     |
| ACa02 | 21 | 9723335  | rs3730978 | G | A | . | PASS | .      | intron  | NON | dis.     |
| ACa02 | 21 | 10139840 | rs2927801 | G | A | . | PASS | .      | intron  | NR_ | dis.     |
| ACa02 | 21 | 11026580 | rs1996169 | T | C | . | PASS | BAGE2  | intron  | NM_ | .        |
| ACa02 | 21 | 11047309 | rs8789866 | G | T | . | PASS | BAGE4  | intron  | NM_ | .        |
| ACa02 | 21 | 11114478 | rs4358221 | G | A | . | PASS | .      | intron  | NM_ | dis.     |
| ACa02 | 21 | 11123779 | .         | T | A | . | PASS | .      | intron  | NM_ | dis.     |
| ACa02 | 21 | 34144206 | rs8664333 | A | C | . | PASS | .      | upsilon | NM_ | .        |
| ACa02 | 21 | 37443162 | rs7967544 | T | G | . | PASS | LOC100 | ncR     | NR_ | .        |
| ACa02 | 21 | 45504131 | .         | G | A | . | PASS | TRAPP1 | exon    | NM_ | synonym  |
| ACa02 | 21 | 47976176 | .         | G | A | . | PASS | DIP2A  | intron  | NM_ | .        |
| ACa02 | 21 | 48103323 | .         | C | T | . | PASS | .      | intron  | NM_ | dis.     |
| ACa02 | 22 | 19748622 | .         | G | A | . | PASS | TBX1   | exon    | NM_ | missens  |
| ACa02 | 22 | 20502354 | rs3702204 | C | T | . | PASS | .      | intron  | NM_ | dis.     |
| ACa02 | 22 | 20502806 | rs1119554 | G | T | . | PASS | .      | intron  | NM_ | dis.     |
| ACa02 | 22 | 21044704 | rs1880252 | C | T | . | PASS | POM121 | ncR     | NR_ | .        |
| ACa02 | 22 | 21663503 | .         | G | A | . | PASS | .      | intron  | NR_ | dis.     |
| ACa02 | X  | 7811824  | rs1637792 | G | C | . | PASS | VCX    | exon    | NM_ | missens  |
| ACa02 | X  | 10450722 | .         | G | A | . | PASS | MID1   | intron  | NM_ | .        |
| ACa02 | X  | 27765544 | .         | G | A | . | PASS | DCAF8  | exon    | NM_ | missens  |
| ACa02 | X  | 30035259 | .         | C | A | . | PASS | .      | intron  | NM_ | dis.     |
| ACa02 | X  | 34150216 | rs7740495 | G | A | . | PASS | FAM47A | exon    | NM_ | synonym  |
| ACa02 | X  | 47082411 | .         | G | C | . | PASS | CDK16  | intron  | NM_ | .        |
| ACa02 | X  | 47082419 | .         | G | T | . | PASS | CDK16  | UTR     | NM_ | NM_      |
| ACa02 | X  | 61685369 | .         | G | T | . | PASS | .      | intron  | NON | dis.     |
| ACa02 | X  | 61696571 | rs8686279 | A | C | . | PASS | .      | intron  | NON | dis.     |
| ACa02 | X  | 61718935 | .         | C | T | . | PASS | .      | intron  | NON | dis.     |
| ACa02 | X  | 61718971 | .         | G | C | . | PASS | .      | intron  | NON | dis.     |
| ACa02 | X  | 70357408 | .         | C | T | . | PASS | MED12  | exon    | NM_ | stopgain |
| ACa02 | X  | 1.02E+08 | .         | T | A | . | PASS | GPRAS  | exon    | NM_ | synonym  |
| ACa02 | X  | 1.03E+08 | .         | G | A | . | PASS | .      | intron  | NM_ | dis.     |
| ACa02 | X  | 1.11E+08 | .         | A | G | . | PASS | DCX    | intron  | NM_ | .        |
| ACa02 | X  | 1.29E+08 | .         | C | A | . | PASS | OCRL   | UTR     | NM_ | NM_      |
| ACa02 | X  | 1.3E+08  | .         | C | T | . | PASS | IGSF1  | intron  | NM_ | .        |
| ACa02 | X  | 1.35E+08 | rs9883463 | T | G | . | PASS | MAP7D1 | intron  | NM_ | .        |
| ACa02 | X  | 1.38E+08 | .         | G | C | . | PASS | FGF13  | intron  | NM_ | .        |
| ACa02 | X  | 1.46E+08 | rs7821231 | G | A | . | PASS | .      | upsilon | NR_ | .        |
| ACa02 | X  | 1.54E+08 | .         | G | A | . | PASS | FLNA   | intron  | NM_ | .        |
| ACa02 | Y  | 59015673 | rs3769023 | C | A | . | PASS | .      | intron  | NON | dis.     |
| ACa02 | MT | 759      | .         | C | T | . | PASS | .      | intron  | NON | dis.     |
| ACa02 | MT | 14563    | rs1057516 | C | T | . | PASS | .      | intron  | NON | dis.     |
| ACa03 | 1  | 674109   | .         | A | G | . | PASS | .      | intron  | NR_ | dis.     |
| ACa03 | 1  | 1644945  | .         | G | A | . | PASS | CDK11A | intron  | NM_ | .        |

|       |   |          |           |   |   |   |      |        |       |        |         |
|-------|---|----------|-----------|---|---|---|------|--------|-------|--------|---------|
| ACa03 | 1 | 3644226  | .         | C | T | . | PASS | TP73   | exon  | NM_    | missens |
| ACa03 | 1 | 12423089 | rs7579432 | C | T | . | PASS | VPS13E | intrc | NM_    | .       |
| ACa03 | 1 | 16890922 | rs5565927 | T | C | . | PASS | NBPF1  | intrc | NM_    | .       |
| ACa03 | 1 | 16891696 | rs7619917 | T | C | . | PASS | NBPF1  | intrc | NM_    | .       |
| ACa03 | 1 | 16893407 | rs663828  | T | C | . | PASS | NBPF1  | intrc | NM_    | .       |
| ACa03 | 1 | 16908275 | rs646524  | T | G | . | PASS | NBPF1  | intrc | NM_    | .       |
| ACa03 | 1 | 16931160 | rs4596945 | G | C | . | PASS | NBPF1  | intrc | NM_    | .       |
| ACa03 | 1 | 16957414 | rs2296161 | C | T | . | PASS | .      | ups   | NR_    | .       |
| ACa03 | 1 | 19549286 | rs5616387 | C | T | . | PASS | EMC1   | exon  | NM_    | missens |
| ACa03 | 1 | 37947479 | .         | G | A | . | PASS | ZC3H12 | intrc | NM_    | .       |
| ACa03 | 1 | 45472818 | rs9490484 | G | T | . | PASS | HECTD1 | intrc | NM_    | .       |
| ACa03 | 1 | 63070550 | .         | T | G | . | PASS | ANGPT1 | UTF   | NM_NM  | .       |
| ACa03 | 1 | 75097583 | .         | G | T | . | PASS | ERICH3 | exon  | NM_    | missens |
| ACa03 | 1 | 76252058 | .         | C | T | . | PASS | RABGG  | intrc | NM_    | .       |
| ACa03 | 1 | 1.16E+08 | .         | G | A | . | PASS | NHLH2  | exon  | NM_    | missens |
| ACa03 | 1 | 1.43E+08 | rs1409433 | T | C | . | PASS | .      | inte  | NR_dis | .       |
| ACa03 | 1 | 1.43E+08 | rs2022010 | G | A | . | PASS | .      | inte  | NR_dis | .       |
| ACa03 | 1 | 1.43E+08 | rs7763460 | C | G | . | PASS | .      | ncR   | NR_    | .       |
| ACa03 | 1 | 1.43E+08 | rs1457064 | G | A | . | PASS | .      | inte  | NR_dis | .       |
| ACa03 | 1 | 1.44E+08 | .         | C | G | . | PASS | NBPF2C | intrc | NM_    | .       |
| ACa03 | 1 | 1.45E+08 | rs1148852 | G | C | . | PASS | NBPF9, | intrc | NM_    | .       |
| ACa03 | 1 | 1.45E+08 | rs3746294 | A | G | . | PASS | NBPF2C | intrc | NM_    | .       |
| ACa03 | 1 | 1.45E+08 | rs3675661 | C | G | . | PASS | NBPF2E | ncR   | NR_    | .       |
| ACa03 | 1 | 1.48E+08 | rs7986155 | T | A | . | PASS | NBPF8  | intrc | NM_    | .       |
| ACa03 | 1 | 1.56E+08 | rs7593611 | G | A | . | PASS | MEX3A  | exon  | NM_    | synonyr |
| ACa03 | 1 | 1.59E+08 | .         | G | T | . | PASS | OR6P1  | exon  | NM_    | missens |
| ACa03 | 1 | 2.01E+08 | .         | G | C | . | PASS | LAD1   | intrc | NM_    | .       |
| ACa03 | 1 | 2.03E+08 | rs7508890 | G | A | . | PASS | PPFIA4 | exon  | NM_    | missens |
| ACa03 | 1 | 2.26E+08 | rs1454313 | A | G | . | PASS | LEFTY1 | exon  | NM_    | missens |
| ACa03 | 1 | 2.48E+08 | rs3720052 | C | T | . | PASS | OR6F1  | exon  | NM_    | missens |
| ACa03 | 1 | 2.49E+08 | rs8789457 | A | G | . | PASS | .      | ups   | NM_    | .       |
| ACa03 | 2 | 17773489 | .         | C | A | . | PASS | VSNL1  | exon  | NM_    | missens |
| ACa03 | 2 | 77749254 | .         | T | A | . | PASS | LRRTM1 | UTF   | NM_NM  | .       |
| ACa03 | 2 | 80530489 | .         | G | A | . | PASS | LRRTM1 | exon  | NM_    | synonyr |
| ACa03 | 2 | 87131091 | rs2013675 | G | A | . | PASS | .      | inte  | NR_dis | .       |
| ACa03 | 2 | 88071329 | .         | G | C | . | PASS | RGPD1  | intrc | NM_    | .       |
| ACa03 | 2 | 1.38E+08 | .         | T | C | . | PASS | .      | inte  | NM_dis | .       |
| ACa03 | 2 | 1.71E+08 | rs1473449 | G | T | . | PASS | UBR3   | intrc | NM_    | .       |
| ACa03 | 2 | 1.82E+08 | .         | C | T | . | PASS | ITGA4  | exon  | NM_    | missens |
| ACa03 | 2 | 2.16E+08 | .         | C | T | . | PASS | ATIC   | splic | NM_NM  | .       |
| ACa03 | 2 | 2.43E+08 | .         | C | A | . | PASS | .      | inte  | NR_dis | .       |
| ACa03 | 3 | 47297292 | rs1050893 | G | C | . | PASS | KIF9   | intrc | NM_    | .       |
| ACa03 | 3 | 47297297 | .         | C | T | . | PASS | KIF9   | intrc | NM_    | .       |
| ACa03 | 3 | 55108112 | rs1178604 | G | A | . | PASS | CACNA  | intrc | NM_    | .       |
| ACa03 | 3 | 74663610 | rs3744125 | G | A | . | PASS | .      | inte  | NM_dis | .       |
| ACa03 | 3 | 77459682 | rs1451899 | C | T | . | PASS | ROBO2  | intrc | NM_    | .       |
| ACa03 | 3 | 1.27E+08 | .         | G | A | . | PASS | MGLL   | intrc | NM_    | .       |
| ACa03 | 3 | 1.31E+08 | .         | A | C | . | PASS | NUDT1E | UTF   | NM_NM  | .       |
| ACa03 | 3 | 1.37E+08 | .         | A | C | . | PASS | IL20RB | intrc | NM_    | .       |
| ACa03 | 3 | 1.38E+08 | .         | T | G | . | PASS | ARMC8  | exon  | NM_    | synonyr |
| ACa03 | 3 | 1.79E+08 | rs1057519 | G | A | . | PASS | PIK3CA | exon  | NM_    | missens |
| ACa03 | 3 | 1.79E+08 | rs1048860 | G | A | . | PASS | PIK3CA | exon  | NM_    | missens |
| ACa03 | 3 | 1.97E+08 | .         | C | A | . | PASS | FYTDD1 | intrc | NM_    | .       |
| ACa03 | 4 | 2306307  | rs3725657 | G | A | . | PASS | ZFYVE2 | exon  | NM_    | missens |

|       |   |          |           |   |   |   |      |         |        |        |         |
|-------|---|----------|-----------|---|---|---|------|---------|--------|--------|---------|
| ACa03 | 4 | 6080728  | .         | A | G | . | PASS | JAKMIP  | splinc | NM_NV  | .       |
| ACa03 | 4 | 9245302  | rs8796734 | A | G | . | PASS | .       | ups    | NM_    | .       |
| ACa03 | 4 | 49261257 | rs5941177 | C | T | . | PASS | .       | intrc  | NM_dis | .       |
| ACa03 | 4 | 73013446 | .         | C | T | . | PASS | NPFFR2  | exo    | NM_    | missens |
| ACa03 | 4 | 1.68E+08 | .         | A | C | . | PASS | SPOCK   | intrc  | NM_    | .       |
| ACa03 | 5 | 34180054 | rs4288119 | G | A | . | PASS | .       | intrc  | NR_dis | .       |
| ACa03 | 5 | 34183130 | rs8669155 | C | T | . | PASS | .       | intrc  | NR_dis | .       |
| ACa03 | 5 | 1.34E+08 | rs7765625 | G | A | . | PASS | JADE2   | exo    | NM_    | missens |
| ACa03 | 5 | 1.71E+08 | rs5593800 | C | T | . | PASS | .       | intrc  | NM_dis | .       |
| ACa03 | 5 | 1.77E+08 | .         | G | A | . | PASS | .       | intrc  | NR_dis | .       |
| ACa03 | 6 | 3138322  | .         | A | C | . | PASS | BPHL    | intrc  | NM_    | .       |
| ACa03 | 6 | 31324628 | rs1513411 | G | C | . | PASS | HLA-B   | exo    | NM_    | missens |
| ACa03 | 6 | 31852180 | .         | C | A | . | PASS | EHMT2   | exo    | NM_    | missens |
| ACa03 | 6 | 35391921 | rs7668272 | C | T | . | PASS | PPARD   | exo    | NM_    | missens |
| ACa03 | 6 | 47251575 | .         | G | A | . | PASS | TNFRSF  | intrc  | NM_    | .       |
| ACa03 | 6 | 52617512 | .         | T | A | . | PASS | GSTA2   | intrc  | NM_    | .       |
| ACa03 | 6 | 75904503 | .         | T | G | . | PASS | COL12A  | intrc  | NM_    | .       |
| ACa03 | 7 | 11860631 | .         | C | T | . | PASS | THSD7B  | intrc  | NM_    | .       |
| ACa03 | 7 | 25208115 | .         | C | T | . | PASS | C7orf31 | intrc  | NM_    | .       |
| ACa03 | 7 | 43590116 | .         | G | A | . | PASS | HECW1   | exo    | NM_    | missens |
| ACa03 | 7 | 44191820 | .         | T | G | . | PASS | GCK     | intrc  | NM_    | .       |
| ACa03 | 7 | 56439590 | .         | C | T | . | PASS | .       | intrc  | NM_dis | .       |
| ACa03 | 7 | 56871105 | rs1439657 | G | A | . | PASS | .       | intrc  | NR_dis | .       |
| ACa03 | 7 | 56886784 | .         | C | T | . | PASS | .       | intrc  | NR_dis | .       |
| ACa03 | 7 | 56888186 | rs8799634 | G | T | . | PASS | .       | intrc  | NR_dis | .       |
| ACa03 | 7 | 56891058 | .         | A | G | . | PASS | .       | intrc  | NR_dis | .       |
| ACa03 | 7 | 56891160 | rs2002309 | C | G | . | PASS | .       | intrc  | NR_dis | .       |
| ACa03 | 7 | 56891593 | .         | C | A | . | PASS | .       | intrc  | NR_dis | .       |
| ACa03 | 7 | 62956286 | rs2018986 | T | C | . | PASS | .       | intrc  | NR_dis | .       |
| ACa03 | 7 | 75128472 | .         | C | T | . | PASS | SPDYE1  | intrc  | NM_    | .       |
| ACa03 | 7 | 75128489 | .         | C | T | . | PASS | SPDYE1  | intrc  | NM_    | .       |
| ACa03 | 7 | 76166588 | .         | G | A | . | PASS | .       | intrc  | NM_dis | .       |
| ACa03 | 7 | 79842137 | .         | G | A | . | PASS | GNAI1   | exo    | NM_    | missens |
| ACa03 | 7 | 92731585 | .         | C | T | . | PASS | SAMD9   | exo    | NM_    | missens |
| ACa03 | 7 | 95216347 | rs2676016 | C | T | . | PASS | PDK4    | exo    | NM_    | missens |
| ACa03 | 7 | 1E+08    | rs1826826 | G | A | . | PASS | NYAP1   | intrc  | NM_    | .       |
| ACa03 | 7 | 1.17E+08 | rs1409779 | C | T | . | PASS | ST7     | intrc  | NM_    | .       |
| ACa03 | 7 | 1.44E+08 | .         | A | C | . | PASS | NOBOX   | intrc  | NM_    | .       |
| ACa03 | 7 | 1.52E+08 | .         | G | C | . | PASS | KMT2C   | intrc  | NM_    | .       |
| ACa03 | 7 | 1.59E+08 | rs7962502 | C | T | . | PASS | .       | intrc  | NM_dis | .       |
| ACa03 | 8 | 6371222  | .         | G | C | . | PASS | ANGPT1  | exo    | NM_    | synonym |
| ACa03 | 8 | 7468654  | rs3763515 | G | A | . | PASS | .       | intrc  | NR_dis | .       |
| ACa03 | 8 | 7885536  | rs5673338 | T | A | . | PASS | .       | intrc  | NR_dis | .       |
| ACa03 | 8 | 17942458 | .         | C | G | . | PASS | LOC101  | ncR    | NR_    | .       |
| ACa03 | 8 | 92346512 | .         | C | T | . | PASS | SLC26A  | intrc  | NM_    | .       |
| ACa03 | 8 | 1.01E+08 | .         | G | A | . | PASS | VPS13E  | intrc  | NM_    | .       |
| ACa03 | 8 | 1.33E+08 | rs5609552 | T | C | . | PASS | KCNQ3   | intrc  | NM_    | .       |
| ACa03 | 9 | 20978329 | .         | G | A | . | PASS | FOCAD   | intrc  | NM_    | .       |
| ACa03 | 9 | 34658334 | rs1463382 | C | T | . | PASS | IL11RA  | intrc  | NM_    | .       |
| ACa03 | 9 | 46843601 | rs7495042 | G | A | . | PASS | .       | ups    | NR_    | .       |
| ACa03 | 9 | 66516655 | .         | C | T | . | PASS | .       | ncR    | NR_    | .       |
| ACa03 | 9 | 67274240 | rs7714176 | G | A | . | PASS | AQP7P   | ncR    | NR_    | .       |
| ACa03 | 9 | 68415355 | rs4452915 | C | T | . | PASS | .       | intrc  | NM_dis | .       |
| ACa03 | 9 | 68415359 | rs7492487 | T | C | . | PASS | .       | intrc  | NM_dis | .       |

|       |    |          |           |   |   |   |      |         |       |     |     |          |
|-------|----|----------|-----------|---|---|---|------|---------|-------|-----|-----|----------|
| ACa03 | 9  | 70993081 | rs391727  | G | C | . | PASS | PGM5    | intrc | NM_ | .   | .        |
| ACa03 | 9  | 74622718 | .         | G | A | . | PASS | .       | inte  | NM_ | dis | .        |
| ACa03 | 9  | 86900782 | .         | G | T | . | PASS | SLC28A  | intrc | NM_ | .   | .        |
| ACa03 | 9  | 1.36E+08 | rs2855049 | T | C | . | PASS | CEL     | intrc | NM_ | .   | .        |
| ACa03 | 9  | 1.39E+08 | rs7771119 | G | A | . | PASS | NOTCH   | exo   | NM_ | .   | synonyr  |
| ACa03 | 10 | 12802960 | .         | G | A | . | PASS | CAMK1   | exo   | NM_ | .   | missens  |
| ACa03 | 10 | 18430225 | .         | G | A | . | PASS | CACNB   | intrc | NM_ | .   | .        |
| ACa03 | 10 | 35858114 | rs7747854 | G | A | . | PASS | CCNY    | UTF   | NM_ | NM_ | .        |
| ACa03 | 10 | 37442393 | rs1759035 | A | G | . | PASS | ANKRD   | intrc | NM_ | .   | .        |
| ACa03 | 10 | 49200211 | rs3125109 | G | A | . | PASS | .       | inte  | NR_ | dis | .        |
| ACa03 | 10 | 72539624 | .         | G | A | . | PASS | TBATA   | intrc | NM_ | .   | .        |
| ACa03 | 10 | 75854181 | rs2018088 | G | A | . | PASS | VCL     | exo   | NM_ | .   | missens  |
| ACa03 | 10 | 85841351 | .         | A | G | . | PASS | .       | inte  | NM_ | dis | .        |
| ACa03 | 10 | 88988731 | rs3128226 | C | G | . | PASS | NUTM2   | intrc | NM_ | .   | .        |
| ACa03 | 10 | 98510597 | .         | G | A | . | PASS | .       | inte  | NM_ | dis | .        |
| ACa03 | 10 | 1.2E+08  | .         | C | G | . | PASS | RAB11F  | UTF   | NM_ | NM_ | .        |
| ACa03 | 10 | 1.24E+08 | rs5495128 | C | T | . | PASS | .       | inte  | NM_ | dis | .        |
| ACa03 | 10 | 1.26E+08 | .         | C | A | . | PASS | CPXM2   | exo   | NM_ | .   | missens  |
| ACa03 | 11 | 44950537 | .         | G | T | . | PASS | TSPAN   | intrc | NM_ | .   | .        |
| ACa03 | 11 | 66512484 | .         | C | T | . | PASS | C11orf8 | intrc | NM_ | .   | .        |
| ACa03 | 11 | 89665513 | .         | A | T | . | PASS | MIR569  | ncR   | NR_ | .   | .        |
| ACa03 | 12 | 89716    | rs7827727 | T | C | . | PASS | LOC10C  | ncR   | NR_ | .   | .        |
| ACa03 | 12 | 4758160  | .         | C | A | . | PASS | AKAP3   | UTF   | NM_ | NM_ | .        |
| ACa03 | 12 | 6709098  | .         | G | C | . | PASS | CHD4    | exo   | NM_ | .   | missens  |
| ACa03 | 12 | 6778145  | .         | G | C | . | PASS | ZNF384  | intrc | NM_ | .   | .        |
| ACa03 | 12 | 8327717  | .         | C | A | . | PASS | ZNF705  | intrc | NM_ | .   | .        |
| ACa03 | 12 | 25398284 | rs1219135 | C | T | . | PASS | KRAS    | exo   | NM_ | .   | missens  |
| ACa03 | 12 | 26848567 | rs3731379 | C | T | . | PASS | ITPR2   | exo   | NM_ | .   | missens  |
| ACa03 | 12 | 31242433 | rs4031316 | T | C | . | PASS | DDX11   | intrc | NM_ | .   | .        |
| ACa03 | 12 | 44124214 | rs5661873 | C | T | . | PASS | PUS7L   | exo   | NM_ | .   | missens  |
| ACa03 | 12 | 50790087 | rs9815586 | G | A | . | PASS | FAM18E  | exo   | NM_ | .   | stopgair |
| ACa03 | 12 | 56231265 | rs1409167 | G | A | . | PASS | MMP19   | intrc | NM_ | .   | .        |
| ACa03 | 12 | 1.23E+08 | .         | C | A | . | PASS | HIP1R   | intrc | NM_ | .   | .        |
| ACa03 | 12 | 1.24E+08 | .         | G | A | . | PASS | DNAH1   | intrc | NM_ | .   | .        |
| ACa03 | 12 | 1.31E+08 | rs1707911 | T | C | . | PASS | .       | inte  | NM_ | dis | .        |
| ACa03 | 12 | 1.33E+08 | rs7662808 | G | A | . | PASS | DDX51   | exo   | NM_ | .   | missens  |
| ACa03 | 13 | 19539354 | rs9079318 | C | T | . | PASS | .       | inte  | NR_ | dis | .        |
| ACa03 | 13 | 28367362 | .         | A | C | . | PASS | GSX1    | intrc | NM_ | .   | .        |
| ACa03 | 13 | 28623894 | rs7666774 | G | A | . | PASS | FLT3    | exo   | NM_ | .   | stopgair |
| ACa03 | 13 | 36410222 | .         | C | T | . | PASS | DCLK1   | exo   | NM_ | .   | missens  |
| ACa03 | 13 | 1.13E+08 | .         | C | T | . | PASS | SPACA   | intrc | NM_ | .   | .        |
| ACa03 | 14 | 19563657 | rs2018046 | T | G | . | PASS | LOC101  | ncR   | NR_ | .   | .        |
| ACa03 | 14 | 19624885 | rs4982820 | G | A | . | PASS | .       | inte  | NM_ | dis | .        |
| ACa03 | 14 | 19644287 | rs2005137 | C | T | . | PASS | .       | inte  | NM_ | dis | .        |
| ACa03 | 14 | 19694665 | .         | T | G | . | PASS | .       | inte  | NR_ | dis | .        |
| ACa03 | 14 | 20106847 | .         | T | C | . | PASS | .       | inte  | NM_ | dis | .        |
| ACa03 | 14 | 20148329 | rs3763109 | C | T | . | PASS | .       | inte  | NM_ | dis | .        |
| ACa03 | 14 | 22434146 | .         | G | T | . | PASS | .       | inte  | NM_ | dis | .        |
| ACa03 | 14 | 24523589 | rs7592315 | G | A | . | PASS | LRRC1   | intrc | NM_ | .   | .        |
| ACa03 | 14 | 1.06E+08 | .         | T | A | . | PASS | .       | inte  | NM_ | dis | .        |
| ACa03 | 14 | 1.06E+08 | rs7473295 | G | A | . | PASS | .       | inte  | NR_ | dis | .        |
| ACa03 | 15 | 20216196 | rs5686085 | C | T | . | PASS | .       | inte  | NON | dis | .        |
| ACa03 | 15 | 20448387 | rs5761409 | G | C | . | PASS | .       | inte  | NON | dis | .        |
| ACa03 | 15 | 20756984 | rs3684417 | G | T | . | PASS | .       | inte  | NM_ | dis | .        |



|       |    |          |           |   |   |   |      |        |              |         |
|-------|----|----------|-----------|---|---|---|------|--------|--------------|---------|
| ACa03 | 15 | 21137759 | rs1130343 | A | C | . | PASS | .      | inte NR_dis  | .       |
| ACa03 | 15 | 21370826 | rs1995519 | C | G | . | PASS | .      | inte NR_dis  | .       |
| ACa03 | 15 | 22546388 | rs1836337 | A | G | . | PASS | .      | ups NR_      | .       |
| ACa03 | 15 | 23478648 | rs3700524 | G | A | . | PASS | .      | intrc NM_    | .       |
| ACa03 | 15 | 23606350 | rs3766397 | G | A | . | PASS | GOLGA  | ncR NR_      | .       |
| ACa03 | 15 | 30659755 | .         | G | A | . | PASS | CHRFA  | intrc NM_    | .       |
| ACa03 | 15 | 41136788 | rs5573362 | C | T | . | PASS | SPINT1 | exo NM_      | synonyr |
| ACa03 | 15 | 42646731 | .         | C | T | . | PASS | .      | dow NM_      | .       |
| ACa03 | 15 | 72954595 | rs7443087 | A | G | . | PASS | GOLGA  | exo NM_      | missens |
| ACa03 | 15 | 82636965 | .         | G | A | . | PASS | GOLGA  | intrc NM_    | .       |
| ACa03 | 16 | 1614158  | .         | T | C | . | PASS | IFT140 | exo NM_      | missens |
| ACa03 | 16 | 3119290  | .         | A | T | . | PASS | IL32   | exo NM_      | synonyr |
| ACa03 | 16 | 12571730 | .         | C | T | . | PASS | SNX29  | intrc NM_    | .       |
| ACa03 | 16 | 29115328 | .         | G | A | . | PASS | RRN3P' | ncR NR_      | .       |
| ACa03 | 16 | 46387441 | rs2887413 | C | G | . | PASS | .      | inte NON dis | .       |
| ACa03 | 16 | 46388702 | rs4966607 | C | T | . | PASS | .      | inte NON dis | .       |
| ACa03 | 16 | 46389631 | rs4359628 | T | G | . | PASS | .      | inte NON dis | .       |
| ACa03 | 16 | 46391941 | rs4249500 | G | A | . | PASS | .      | inte NON dis | .       |
| ACa03 | 16 | 46392009 | rs4372866 | C | T | . | PASS | .      | inte NON dis | .       |
| ACa03 | 16 | 46392046 | rs4396558 | T | A | . | PASS | .      | inte NON dis | .       |
| ACa03 | 16 | 46392187 | rs4249160 | C | T | . | PASS | .      | inte NON dis | .       |
| ACa03 | 16 | 46394150 | rs4967780 | G | C | . | PASS | .      | inte NON dis | .       |
| ACa03 | 16 | 46394809 | rs7203681 | C | T | . | PASS | .      | inte NON dis | .       |
| ACa03 | 16 | 46400019 | rs7826866 | G | A | . | PASS | .      | inte NON dis | .       |
| ACa03 | 16 | 46401863 | rs4249045 | T | C | . | PASS | .      | inte NON dis | .       |
| ACa03 | 16 | 46401949 | rs7188365 | G | T | . | PASS | .      | inte NON dis | .       |
| ACa03 | 16 | 46402061 | rs9972801 | A | G | . | PASS | .      | inte NON dis | .       |
| ACa03 | 16 | 46402080 | rs4249048 | G | C | . | PASS | .      | inte NON dis | .       |
| ACa03 | 16 | 46402947 | rs7823469 | C | A | . | PASS | .      | inte NON dis | .       |
| ACa03 | 16 | 46405534 | rs1393031 | A | G | . | PASS | .      | inte NON dis | .       |
| ACa03 | 16 | 46406765 | rs4090116 | C | T | . | PASS | .      | inte NON dis | .       |
| ACa03 | 16 | 46406884 | rs4090115 | C | T | . | PASS | .      | inte NON dis | .       |
| ACa03 | 16 | 46407723 | rs4459567 | C | T | . | PASS | .      | inte NON dis | .       |
| ACa03 | 16 | 46407894 | rs6133865 | A | T | . | PASS | .      | inte NON dis | .       |
| ACa03 | 16 | 46408354 | rs4341908 | A | C | . | PASS | .      | inte NON dis | .       |
| ACa03 | 16 | 46408513 | rs4451975 | A | C | . | PASS | .      | inte NON dis | .       |
| ACa03 | 16 | 46420402 | rs7187636 | T | C | . | PASS | .      | inte NON dis | .       |
| ACa03 | 16 | 70020483 | .         | C | A | . | PASS | PDXDC  | ncR NR_      | .       |
| ACa03 | 16 | 70154480 | rs2004697 | A | G | . | PASS | PDPR   | exo NM_      | missens |
| ACa03 | 16 | 70473074 | .         | A | C | . | PASS | .      | ups NM_      | .       |
| ACa03 | 16 | 89858338 | .         | C | G | . | PASS | FANCA  | exo NM_      | missens |
| ACa03 | 16 | 89902722 | .         | C | A | . | PASS | SPIRE2 | intrc NM_    | .       |
| ACa03 | 17 | 1715169  | .         | T | G | . | PASS | SMYD4  | intrc NM_    | .       |
| ACa03 | 17 | 9862686  | .         | G | A | . | PASS | GAS7   | UTF NM_NV    | .       |
| ACa03 | 17 | 17942355 | .         | G | T | . | PASS | ATPAF2 | UTF NM_NV    | .       |
| ACa03 | 17 | 22253129 | rs1440233 | G | A | . | PASS | .      | inte NM_dis  | .       |
| ACa03 | 17 | 22253154 | rs4362423 | T | G | . | PASS | .      | inte NM_dis  | .       |
| ACa03 | 17 | 34813271 | rs1409172 | A | G | . | PASS | .      | inte NM_dis  | .       |
| ACa03 | 17 | 36281954 | rs3737234 | C | A | . | PASS | .      | inte NR_dis  | .       |
| ACa03 | 17 | 36636008 | .         | C | T | . | PASS | ARHGA  | exo NM_      | missens |
| ACa03 | 17 | 36646848 | .         | A | G | . | PASS | ARHGA  | intrc NM_    | .       |
| ACa03 | 17 | 38126930 | rs8679073 | A | T | . | PASS | GSDMA  | intrc NM_    | .       |
| ACa03 | 17 | 42646434 | .         | G | A | . | PASS | .      | inte NM_dis  | .       |
| ACa03 | 17 | 44144162 | .         | G | A | . | PASS | KANSL1 | intrc NM_    | .       |

|       |    |          |           |   |   |   |      |         |             |         |
|-------|----|----------|-----------|---|---|---|------|---------|-------------|---------|
| ACa03 | 17 | 64881187 | rs7651139 | C | T | . | PASS | CACNG   | exo NM_     | missens |
| ACa03 | 17 | 73592837 | rs7754213 | G | A | . | PASS | MYO15l  | ncR NR_     | .       |
| ACa03 | 17 | 74898771 | .         | G | A | . | PASS | MGAT5l  | intrc NM_   | .       |
| ACa03 | 17 | 75303430 | rs5408783 | C | T | . | PASS | 9-Sep   | intrc NM_   | .       |
| ACa03 | 17 | 79639149 | .         | G | A | . | PASS | CCDC1   | exo NM_     | synonyr |
| ACa03 | 17 | 79769449 | .         | C | T | . | PASS | GCGR    | intrc NM_   | .       |
| ACa03 | 17 | 80039454 | rs3732207 | C | T | . | PASS | FASN    | intrc NM_   | .       |
| ACa03 | 18 | 12264368 | .         | C | T | . | PASS | CIDEA   | exo NM_     | synonyr |
| ACa03 | 19 | 4544051  | rs7575217 | C | T | . | PASS | SEMA6l  | exo NM_     | synonyr |
| ACa03 | 19 | 6415948  | .         | G | A | . | PASS | KHSRP   | intrc NM_   | .       |
| ACa03 | 19 | 7685588  | .         | G | T | . | PASS | XAB2    | intrc NM_   | .       |
| ACa03 | 19 | 7999266  | .         | G | T | . | PASS | TIMM44  | intrc NM_   | .       |
| ACa03 | 19 | 8173984  | .         | C | A | . | PASS | FBN3    | intrc NM_   | .       |
| ACa03 | 19 | 8880680  | rs1492924 | G | A | . | PASS | .       | inte NM_dis | .       |
| ACa03 | 19 | 33418071 | rs1999730 | T | C | . | PASS | CEP89   | intrc NM_   | .       |
| ACa03 | 19 | 37780243 | rs3762437 | G | T | . | PASS | .       | inte NR_dis | .       |
| ACa03 | 19 | 37785301 | rs7125437 | C | G | . | PASS | .       | inte NR_dis | .       |
| ACa03 | 19 | 41018712 | .         | C | T | . | PASS | SPTBN2  | exo NM_     | synonyr |
| ACa03 | 19 | 41893613 | .         | A | C | . | PASS | EXOSC   | intrc NM_   | .       |
| ACa03 | 19 | 43787795 | .         | C | G | . | PASS | .       | inte NM_dis | .       |
| ACa03 | 19 | 48558299 | .         | C | A | . | PASS | PLA2G4  | exo NM_     | missens |
| ACa03 | 19 | 49551897 | rs6212787 | C | A | . | PASS | CGB8    | intrc NM_   | .       |
| ACa03 | 19 | 51331278 | .         | A | C | . | PASS | KLK15   | intrc NM_   | .       |
| ACa03 | 19 | 53945648 | rs5492748 | T | C | . | PASS | TPM3P1  | ncR NR_     | .       |
| ACa03 | 19 | 54225561 | .         | T | C | . | PASS | .       | dow NR_     | .       |
| ACa03 | 19 | 54404000 | rs7600928 | G | A | . | PASS | PRKCG   | exo NM_     | synonyr |
| ACa03 | 19 | 58151254 | .         | G | T | . | PASS | ZNF211  | intrc NM_   | .       |
| ACa03 | 19 | 58385467 | rs7704038 | T | G | . | PASS | ZNF814  | exo NM_     | missens |
| ACa03 | 19 | 59083815 | .         | C | T | . | PASS | MZF1-A  | ncR NR_     | .       |
| ACa03 | 20 | 2380513  | .         | C | T | . | PASS | TGM6    | intrc NM_   | .       |
| ACa03 | 20 | 5909667  | .         | G | T | . | PASS | .       | inte NM_dis | .       |
| ACa03 | 20 | 26174148 | .         | C | A | . | PASS | MIR663  | ncR NR_     | .       |
| ACa03 | 20 | 29628491 | rs9569348 | A | G | . | PASS | FRG1B   | ncR NR_     | .       |
| ACa03 | 20 | 44099904 | .         | C | A | . | PASS | WFDC2   | intrc NM_   | .       |
| ACa03 | 21 | 10535397 | rs3772733 | C | T | . | PASS | .       | inte NR_dis | .       |
| ACa03 | 21 | 11059912 | rs9184726 | C | T | . | PASS | BAGE1E  | intrc NM_   | .       |
| ACa03 | 21 | 11114515 | rs9266067 | A | G | . | PASS | .       | inte NM_dis | .       |
| ACa03 | 21 | 11164201 | .         | G | A | . | PASS | .       | inte NM_dis | .       |
| ACa03 | 21 | 34954231 | .         | C | T | . | PASS | DONSO   | intrc NM_   | .       |
| ACa03 | 21 | 37443162 | rs7967544 | T | G | . | PASS | LOC10C  | ncR NR_     | .       |
| ACa03 | 22 | 16405002 | rs2019683 | C | T | . | PASS | .       | inte NM_dis | .       |
| ACa03 | 22 | 21349411 | rs7543647 | C | T | . | PASS | LZTR1   | intrc NM_   | .       |
| ACa03 | 22 | 28392112 | rs5711604 | G | A | . | PASS | TTC28-  | ncR NR_     | .       |
| ACa03 | 22 | 29804684 | rs1856371 | C | T | . | PASS | .       | inte NM_dis | .       |
| ACa03 | 22 | 35811911 | rs3713772 | C | T | . | PASS | MCM5    | exo NM_     | synonyr |
| ACa03 | 22 | 38621350 | .         | G | A | . | PASS | TMEM1   | intrc NM_   | .       |
| ACa03 | 22 | 39218542 | .         | G | A | . | PASS | NPTXR   | UTF NM_NM   | .       |
| ACa03 | 22 | 48023174 | .         | C | A | . | PASS | LINC001 | ncR NR_     | .       |
| ACa03 | X  | 1010738  | rs6644312 | G | T | . | PASS | .       | inte NM_dis | .       |
| ACa03 | X  | 9791221  | rs2010857 | T | C | . | PASS | SHROC   | intrc NM_   | .       |
| ACa03 | X  | 10062212 | .         | C | T | . | PASS | WWC3    | exo NM_     | missens |
| ACa03 | X  | 38008990 | rs7457127 | C | T | . | PASS | SRPX    | exo NM_     | missens |
| ACa03 | X  | 48544044 | .         | G | A | . | PASS | WAS     | intrc NM_   | .       |
| ACa03 | X  | 49069162 | rs7825308 | G | A | . | PASS | CACNA   | exo NM_     | missens |

|       |    |          |           |   |   |   |      |         |       |              |
|-------|----|----------|-----------|---|---|---|------|---------|-------|--------------|
| ACa03 | X  | 61687463 | .         | G | C | . | PASS | .       | inter | NON dis.     |
| ACa03 | X  | 61712615 | .         | T | C | . | PASS | .       | inter | NON dis.     |
| ACa03 | X  | 61712692 | rs7756689 | A | G | . | PASS | .       | inter | NON dis.     |
| ACa03 | X  | 72797180 | rs2486782 | A | T | . | PASS | CHIC1   | intrc | NM_.         |
| ACa03 | X  | 1.12E+08 | .         | G | A | . | PASS | AMOT    | exo   | NM_ missens  |
| ACa03 | X  | 1.2E+08  | .         | T | C | . | PASS | C1GAL1  | exo   | NM_ missens  |
| ACa03 | X  | 1.24E+08 | .         | C | T | . | PASS | .       | ups   | NM_.         |
| ACa03 | X  | 1.39E+08 | rs1016097 | C | A | . | PASS | MCF2    | intrc | NM_.         |
| ACa03 | X  | 1.52E+08 | .         | G | A | . | PASS | NSDHL   | intrc | NM_.         |
| ACa03 | X  | 1.55E+08 | rs7802961 | G | A | . | PASS | .       | inter | NM_dis.      |
| ACa03 | MT | 4451     | .         | T | C | . | PASS | .       | inter | NON dis.     |
| ACa03 | MT | 5777     | rs3868289 | G | A | . | PASS | .       | inter | NON dis.     |
| ACa03 | MT | 12474    | .         | C | A | . | PASS | .       | inter | NON dis.     |
| ACa04 | 1  | 1396169  | rs7466465 | C | T | . | PASS | ATAD3C  | exo   | NM_ synonymr |
| ACa04 | 1  | 1582548  | .         | C | G | . | PASS | CDK11E  | intrc | NM_.         |
| ACa04 | 1  | 11710616 | rs1454709 | C | T | . | PASS | FBXO2   | exo   | NM_ missens  |
| ACa04 | 1  | 11740656 | .         | C | T | . | PASS | MAD2L2  | exo   | NM_ missens  |
| ACa04 | 1  | 12921635 | rs1440990 | G | A | . | PASS | PRAME   | UTF   | NM_NM.       |
| ACa04 | 1  | 12936256 | rs1157686 | G | C | . | PASS | .       | inter | NM_dis.      |
| ACa04 | 1  | 17007400 | .         | T | A | . | PASS | .       | ups   | NR_.         |
| ACa04 | 1  | 17183526 | rs7511577 | C | T | . | PASS | .       | inter | NM_dis.      |
| ACa04 | 1  | 21048338 | .         | G | C | . | PASS | SH2D5   | exo   | NM_ missens  |
| ACa04 | 1  | 23743493 | rs5551428 | C | T | . | PASS | TCEA3   | intrc | NM_.         |
| ACa04 | 1  | 24657930 | rs1422489 | G | A | . | PASS | GRHL3   | exo   | NM_ missens  |
| ACa04 | 1  | 25616915 | .         | G | A | . | PASS | RHD     | intrc | NM_.         |
| ACa04 | 1  | 32160745 | .         | G | A | . | PASS | COL16A1 | intrc | NM_.         |
| ACa04 | 1  | 33402492 | rs7753177 | G | A | . | PASS | RNF19E  | exo   | NM_ unknow   |
| ACa04 | 1  | 38003606 | .         | C | T | . | PASS | SNIP1   | exo   | NM_ missens  |
| ACa04 | 1  | 39906714 | .         | G | C | . | PASS | MACF1   | exo   | NM_ missens  |
| ACa04 | 1  | 39906811 | .         | G | T | . | PASS | MACF1   | intrc | NM_.         |
| ACa04 | 1  | 39907024 | .         | G | T | . | PASS | MACF1   | intrc | NM_.         |
| ACa04 | 1  | 39908309 | .         | G | C | . | PASS | MACF1   | intrc | NM_.         |
| ACa04 | 1  | 41583066 | .         | A | G | . | PASS | SCMH1   | intrc | NM_.         |
| ACa04 | 1  | 44595584 | rs7580073 | C | T | . | PASS | KLF17   | exo   | NM_ missens  |
| ACa04 | 1  | 46707594 | rs8662033 | C | A | . | PASS | .       | inter | NM_dis.      |
| ACa04 | 1  | 54656279 | .         | C | T | . | PASS | CYB5R1  | intrc | NM_.         |
| ACa04 | 1  | 62503734 | .         | C | G | . | PASS | INADL   | intrc | NM_.         |
| ACa04 | 1  | 70144225 | .         | G | A | . | PASS | .       | inter | NR_dis.      |
| ACa04 | 1  | 74790728 | .         | G | A | . | PASS | FPGT-T  | intrc | NM_.         |
| ACa04 | 1  | 93222477 | .         | G | A | . | PASS | EVI5    | intrc | NM_.         |
| ACa04 | 1  | 94484293 | .         | C | A | . | PASS | ABCA4   | intrc | NM_.         |
| ACa04 | 1  | 99225562 | .         | G | A | . | PASS | SNX7    | intrc | NM_.         |
| ACa04 | 1  | 1.11E+08 | rs7598590 | G | A | . | PASS | CD53    | intrc | NM_.         |
| ACa04 | 1  | 1.13E+08 | .         | G | A | . | PASS | LOC643  | exo   | NM_ synonymr |
| ACa04 | 1  | 1.21E+08 | rs2004173 | G | A | . | PASS | FCGR11  | UTF   | NM_NM.       |
| ACa04 | 1  | 1.43E+08 | rs1043712 | C | T | . | PASS | .       | inter | NON dis.     |
| ACa04 | 1  | 1.43E+08 | .         | C | T | . | PASS | .       | inter | NR_dis.      |
| ACa04 | 1  | 1.43E+08 | rs2002777 | G | A | . | PASS | .       | inter | NR_dis.      |
| ACa04 | 1  | 1.43E+08 | rs7506054 | A | G | . | PASS | .       | inter | NR_dis.      |
| ACa04 | 1  | 1.43E+08 | rs1694653 | C | G | . | PASS | .       | inter | NR_dis.      |
| ACa04 | 1  | 1.45E+08 | rs4125366 | A | T | . | PASS | NBPF2C  | intrc | NM_.         |
| ACa04 | 1  | 1.45E+08 | .         | T | G | . | PASS | NBPF2f  | ncR   | NR_.         |
| ACa04 | 1  | 1.46E+08 | .         | A | G | . | PASS | NBPF2f  | ncR   | NR_.         |
| ACa04 | 1  | 1.48E+08 | rs6181199 | G | A | . | PASS | NBPF11  | intrc | NM_.         |

|       |   |          |           |   |   |   |      |                  |       |        |         |   |
|-------|---|----------|-----------|---|---|---|------|------------------|-------|--------|---------|---|
| ACa04 | 1 | 1.48E+08 | rs8799948 | C | A | . | PASS | NBPF8            | intrc | NM_    | .       | . |
| ACa04 | 1 | 1.48E+08 | rs482979  | C | T | . | PASS | NBPF2 $\epsilon$ | ncR   | NR_    | .       | . |
| ACa04 | 1 | 1.49E+08 | rs2021032 | T | G | . | PASS | NBPF2 $\epsilon$ | ncR   | NR_    | .       | . |
| ACa04 | 1 | 1.49E+08 | rs2009700 | C | G | . | PASS | NBPF2 $\epsilon$ | ncR   | NR_    | .       | . |
| ACa04 | 1 | 1.49E+08 | rs2003739 | G | A | . | PASS | NBPF2 $\epsilon$ | ncR   | NR_    | .       | . |
| ACa04 | 1 | 1.49E+08 | rs3705433 | G | A | . | PASS | NBPF2 $\epsilon$ | ncR   | NR_    | .       | . |
| ACa04 | 1 | 1.49E+08 | rs226753  | G | C | . | PASS | NBPF2 $\epsilon$ | ncR   | NR_    | .       | . |
| ACa04 | 1 | 1.49E+08 | .         | G | A | . | PASS | NBPF2 $\epsilon$ | ncR   | NR_    | .       | . |
| ACa04 | 1 | 1.49E+08 | rs2787777 | C | T | . | PASS | .                | inte  | NR_dis | .       | . |
| ACa04 | 1 | 1.53E+08 | rs3750007 | T | A | . | PASS | .                | dow   | NM_    | .       | . |
| ACa04 | 1 | 1.54E+08 | .         | C | T | . | PASS | .                | inte  | NM_dis | .       | . |
| ACa04 | 1 | 1.54E+08 | .         | C | G | . | PASS | INTS3            | intrc | NM_    | .       | . |
| ACa04 | 1 | 1.54E+08 | .         | C | A | . | PASS | SLC27A           | intrc | NM_    | .       | . |
| ACa04 | 1 | 1.55E+08 | .         | A | T | . | PASS | SLC50A           | exo   | NM_    | synonyr | . |
| ACa04 | 1 | 1.56E+08 | .         | G | T | . | PASS | ARHGE            | intrc | NM_    | .       | . |
| ACa04 | 1 | 1.57E+08 | .         | C | T | . | PASS | PEAR1            | intrc | NM_    | .       | . |
| ACa04 | 1 | 1.57E+08 | .         | C | T | . | PASS | PEAR1            | exo   | NM_    | synonyr | . |
| ACa04 | 1 | 1.73E+08 | .         | C | T | . | PASS | TNFSF $\zeta$    | intrc | NM_    | .       | . |
| ACa04 | 1 | 1.97E+08 | .         | C | G | . | PASS | ASPM             | exo   | NM_    | missens | . |
| ACa04 | 1 | 2.01E+08 | rs1997462 | G | A | . | PASS | KIF21B           | intrc | NM_    | .       | . |
| ACa04 | 1 | 2.04E+08 | rs3692540 | G | A | . | PASS | PLEKH $\gamma$   | exo   | NM_    | missens | . |
| ACa04 | 1 | 2.21E+08 | .         | G | A | . | PASS | C1orf11          | exo   | NM_    | missens | . |
| ACa04 | 1 | 2.24E+08 | .         | C | T | . | PASS | CAPN2            | exo   | NM_    | missens | . |
| ACa04 | 1 | 2.24E+08 | .         | G | A | . | PASS | .                | inte  | NM_dis | .       | . |
| ACa04 | 1 | 2.29E+08 | rs7793949 | G | A | . | PASS | OBSCN            | intrc | NM_    | .       | . |
| ACa04 | 2 | 9347094  | .         | C | T | . | PASS | ASAP2            | UTF   | NM_NV  | .       | . |
| ACa04 | 2 | 9991574  | .         | C | G | . | PASS | TAF1B            | intrc | NM_    | .       | . |
| ACa04 | 2 | 24290671 | .         | G | C | . | PASS | SF3B6            | exo   | NM_    | synonyr | . |
| ACa04 | 2 | 27445559 | .         | G | C | . | PASS | CAD              | intrc | NM_    | .       | . |
| ACa04 | 2 | 27763222 | .         | C | A | . | PASS | .                | inte  | NM_dis | .       | . |
| ACa04 | 2 | 44547496 | .         | C | T | . | PASS | SLC3A1           | exo   | NM_    | synonyr | . |
| ACa04 | 2 | 44547872 | .         | C | T | . | PASS | SLC3A1           | UTF   | NM_NV  | .       | . |
| ACa04 | 2 | 46787755 | .         | A | G | . | PASS | RHOQ             | intrc | NM_    | .       | . |
| ACa04 | 2 | 65729306 | .         | C | G | . | PASS | .                | inte  | NM_dis | .       | . |
| ACa04 | 2 | 69009288 | .         | C | G | . | PASS | ARHGA            | intrc | NM_    | .       | . |
| ACa04 | 2 | 71839619 | .         | C | T | . | PASS | DYSF             | intrc | NM_    | .       | . |
| ACa04 | 2 | 85570645 | rs3764475 | C | T | . | PASS | RETSA            | intrc | NM_    | .       | . |
| ACa04 | 2 | 86362060 | rs1425097 | C | T | . | PASS | PTCD3            | exo   | NM_    | synonyr | . |
| ACa04 | 2 | 86440603 | .         | C | T | . | PASS | .                | dow   | NM_    | .       | . |
| ACa04 | 2 | 86851036 | .         | G | A | . | PASS | RNF10 $\beta$    | intrc | NM_    | .       | . |
| ACa04 | 2 | 87211799 | rs8671368 | A | G | . | PASS | RGPD2            | intrc | NM_    | .       | . |
| ACa04 | 2 | 87211809 | rs8674281 | C | A | . | PASS | RGPD1            | intrc | NM_    | .       | . |
| ACa04 | 2 | 87276887 | .         | C | T | . | PASS | LOC28 $\epsilon$ | ncR   | NR_    | .       | . |
| ACa04 | 2 | 90473577 | rs1210470 | G | A | . | PASS | .                | inte  | NR_dis | .       | . |
| ACa04 | 2 | 95858692 | rs2015850 | T | C | . | PASS | .                | inte  | NM_dis | .       | . |
| ACa04 | 2 | 1.03E+08 | .         | C | T | . | PASS | SLC9A2           | exo   | NM_    | synonyr | . |
| ACa04 | 2 | 1.12E+08 | .         | G | A | . | PASS | ACOXL            | intrc | NM_    | .       | . |
| ACa04 | 2 | 1.13E+08 | .         | G | C | . | PASS | POLR1 $\beta$    | intrc | NM_    | .       | . |
| ACa04 | 2 | 1.19E+08 | rs6216365 | A | T | . | PASS | INSIG2           | intrc | NM_    | .       | . |
| ACa04 | 2 | 1.28E+08 | .         | C | T | . | PASS | IWS1             | UTF   | NM_NV  | .       | . |
| ACa04 | 2 | 1.31E+08 | .         | C | T | . | PASS | POTEF            | intrc | NM_    | .       | . |
| ACa04 | 2 | 1.31E+08 | rs1839843 | T | C | . | PASS | POTEF            | exo   | NM_    | synonyr | . |
| ACa04 | 2 | 1.32E+08 | rs2001821 | A | G | . | PASS | POTEE            | intrc | NM_    | .       | . |
| ACa04 | 2 | 1.32E+08 | .         | C | T | . | PASS | LOC401           | ncR   | NR_    | .       | . |

|       |   |          |           |   |      |         |        |        |          |         |
|-------|---|----------|-----------|---|------|---------|--------|--------|----------|---------|
| ACa04 | 2 | 1.54E+08 | G         | T | PASS | RPRM    | UTF    | NM_NV  | .        |         |
| ACa04 | 2 | 1.6E+08  | G         | C | PASS | WDSUE   | intrc  | NM_    | .        |         |
| ACa04 | 2 | 1.78E+08 | T         | G | PASS | .       | inte   | NM_dis | .        |         |
| ACa04 | 2 | 1.8E+08  | C         | T | PASS | CCDC1   | exo    | NM_    | missens  |         |
| ACa04 | 2 | 1.98E+08 | T         | G | PASS | GTF3C   | intrc  | NM_    | .        |         |
| ACa04 | 2 | 2.11E+08 | T         | C | PASS | CPS1    | intrc  | NM_    | .        |         |
| ACa04 | 2 | 2.17E+08 | C         | T | PASS | TMEM1   | intrc  | NM_    | .        |         |
| ACa04 | 2 | 2.31E+08 | G         | A | PASS | SP140   | exo    | NM_    | missens  |         |
| ACa04 | 2 | 2.31E+08 | G         | A | PASS | SP140   | intrc  | NM_    | .        |         |
| ACa04 | 2 | 2.4E+08  | C         | T | PASS | HDAC4   | intrc  | NM_    | .        |         |
| ACa04 | 3 | 12892058 | G         | A | PASS | .       | inte   | NM_dis | .        |         |
| ACa04 | 3 | 15117322 | G         | A | PASS | ZFYVE2  | intrc  | NM_    | .        |         |
| ACa04 | 3 | 15286887 | G         | A | PASS | CAPN7   | intrc  | NM_    | .        |         |
| ACa04 | 3 | 31837795 | G         | T | PASS | OSBPL   | intrc  | NM_    | .        |         |
| ACa04 | 3 | 32586427 | C         | G | PASS | DYNC11  | exo    | NM_    | missens  |         |
| ACa04 | 3 | 47038617 | C         | T | PASS | NBEAL2  | intrc  | NM_    | .        |         |
| ACa04 | 3 | 47270077 | G         | A | PASS | KIF9-A5 | ncR    | NR_    | .        |         |
| ACa04 | 3 | 49060155 | C         | T | PASS | NDUFA   | exo    | NM_    | synonyr  |         |
| ACa04 | 3 | 50386165 | C         | T | PASS | NPRL2   | exo    | NM_    | missens  |         |
| ACa04 | 3 | 50413184 | G         | A | PASS | CACNA   | intrc  | NM_    | .        |         |
| ACa04 | 3 | 52552723 | rs7801345 | C | T    | PASS    | STAB1  | intrc  | NM_      | .       |
| ACa04 | 3 | 52836359 | rs3677973 | G | A    | PASS    | ITIH3  | exo    | NM_      | missens |
| ACa04 | 3 | 55508349 | rs7454520 | G | A    | PASS    | WNT5A  | intrc  | NM_      | .       |
| ACa04 | 3 | 97439031 | A         | T | PASS | EPHA6   | intrc  | NM_    | .        |         |
| ACa04 | 3 | 99643257 | rs1911937 | G | A    | PASS    | MIR548 | ncR    | NR_      | .       |
| ACa04 | 3 | 1.14E+08 | C         | T | PASS | ZNF80   | exo    | NM_    | missens  |         |
| ACa04 | 3 | 1.2E+08  | C         | G | PASS | GPR15   | exo    | NM_    | missens  |         |
| ACa04 | 3 | 1.23E+08 | C         | T | PASS | SEMA5   | intrc  | NM_    | .        |         |
| ACa04 | 3 | 1.29E+08 | C         | T | PASS | H1FX    | exo    | NM_    | missens  |         |
| ACa04 | 3 | 1.29E+08 | C         | T | PASS | RPL32F  | ncR    | NR_    | .        |         |
| ACa04 | 3 | 1.29E+08 | C         | T | PASS | MBD4    | exo    | NM_    | missens  |         |
| ACa04 | 3 | 1.29E+08 | C         | T | PASS | MBD4    | intrc  | NM_    | .        |         |
| ACa04 | 3 | 1.3E+08  | G         | A | PASS | COL6A   | exo    | NM_    | synonyr  |         |
| ACa04 | 3 | 1.31E+08 | C         | T | PASS | ATP2C   | exo    | NM_    | synonyr  |         |
| ACa04 | 3 | 1.38E+08 | rs1469630 | G | A    | PASS    | NME9   | intrc  | NM_      | .       |
| ACa04 | 3 | 1.39E+08 | C         | A | PASS | FOXL2   | exo    | NM_    | stopgair |         |
| ACa04 | 3 | 1.41E+08 | G         | A | PASS | GRK7    | exo    | NM_    | synonyr  |         |
| ACa04 | 3 | 1.42E+08 | T         | G | PASS | ATR     | intrc  | NM_    | .        |         |
| ACa04 | 3 | 1.51E+08 | rs7613736 | G | C    | PASS    | P2RY12 | intrc  | NM_      | .       |
| ACa04 | 3 | 1.58E+08 | C         | T | PASS | MLF1    | intrc  | NM_    | .        |         |
| ACa04 | 3 | 1.67E+08 | G         | A | PASS | ZBBX    | intrc  | NM_    | .        |         |
| ACa04 | 3 | 1.71E+08 | G         | C | PASS | SLC2A2  | exo    | NM_    | synonyr  |         |
| ACa04 | 3 | 1.72E+08 | C         | T | PASS | FNDC3   | exo    | NM_    | synonyr  |         |
| ACa04 | 3 | 1.84E+08 | C         | G | PASS | HTR3E   | exo    | NM_    | missens  |         |
| ACa04 | 3 | 1.85E+08 | G         | A | PASS | SEN2    | intrc  | NM_    | .        |         |
| ACa04 | 3 | 1.87E+08 | G         | A | PASS | RFC4    | intrc  | NM_    | .        |         |
| ACa04 | 3 | 1.93E+08 | C         | T | PASS | HRASL   | intrc  | NM_    | .        |         |
| ACa04 | 3 | 1.95E+08 | rs8795450 | C | T    | PASS    | .      | inte   | NM_dis   | .       |
| ACa04 | 3 | 1.95E+08 | C         | T | PASS | .       | inte   | NM_dis | .        |         |
| ACa04 | 3 | 1.96E+08 | rs4927838 | G | A    | PASS    | SDHAP  | ncR    | NR_      | .       |
| ACa04 | 3 | 1.96E+08 | rs1739998 | C | T    | PASS    | SDHAP  | ncR    | NR_      | .       |
| ACa04 | 4 | 67919    | rs4022005 | C | T    | PASS    | ZNF595 | intrc  | NM_      | .       |
| ACa04 | 4 | 983923   | rs7518089 | C | T    | PASS    | SLC26A | exo    | NM_      | synonyr |
| ACa04 | 4 | 23814675 | rs7529426 | G | A    | PASS    | PPARG  | exo    | NM_      | missens |

|       |   |          |           |   |   |   |      |           |              |          |
|-------|---|----------|-----------|---|---|---|------|-----------|--------------|----------|
| ACa04 | 4 | 28824738 | .         | G | A | . | PASS | .         | inter NR_dis |          |
| ACa04 | 4 | 40099192 | .         | G | A | . | PASS | N4BP2     | splice NM_NV |          |
| ACa04 | 4 | 41608010 | .         | C | G | . | PASS | LIMCH1    | exon NM_     | missense |
| ACa04 | 4 | 49237957 | rs7541707 | G | T | . | PASS | .         | inter NM_dis |          |
| ACa04 | 4 | 57220835 | .         | G | A | . | PASS | AASDH     | intron NM_   | .        |
| ACa04 | 4 | 75067120 | rs5423520 | C | T | . | PASS | MTHFD1    | intron NM_   | .        |
| ACa04 | 4 | 79507362 | .         | G | C | . | PASS | ANXA3     | intron NM_   | .        |
| ACa04 | 4 | 1.04E+08 | rs8789415 | C | A | . | PASS | CISD2     | UTR NM_NV    | .        |
| ACa04 | 4 | 1.1E+08  | rs8900187 | C | T | . | PASS | COL25A1   | intron NM_   | .        |
| ACa04 | 4 | 1.19E+08 | .         | G | A | . | PASS | SNHG8     | ncR NR_      | .        |
| ACa04 | 4 | 1.29E+08 | rs1378897 | A | T | . | PASS | MFSD8     | intron NM_   | .        |
| ACa04 | 4 | 1.34E+08 | .         | G | C | . | PASS | PCDH10    | exon NM_     | missense |
| ACa04 | 4 | 1.45E+08 | rs3676041 | A | G | . | PASS | GYPB      | intron NM_   | .        |
| ACa04 | 4 | 1.57E+08 | .         | T | G | . | PASS | GUCY1B3   | intron NM_   | .        |
| ACa04 | 4 | 1.7E+08  | .         | T | C | . | PASS | NEK1      | intron NM_   | .        |
| ACa04 | 4 | 1.88E+08 | .         | G | C | . | PASS | .         | upsilon NR_  | .        |
| ACa04 | 5 | 311434   | .         | G | A | . | PASS | PDCD6     | exon NM_     | missense |
| ACa04 | 5 | 12795084 | .         | C | T | . | PASS | LINC01033 | ncR NR_      | .        |
| ACa04 | 5 | 42467975 | .         | G | A | . | PASS | GHR       | intron NM_   | .        |
| ACa04 | 5 | 55439821 | .         | A | C | . | PASS | ANKRD18   | intron NM_   | .        |
| ACa04 | 5 | 56718954 | .         | G | A | . | PASS | .         | inter NM_dis |          |
| ACa04 | 5 | 66085342 | .         | T | A | . | PASS | MAST4     | intron NM_   | .        |
| ACa04 | 5 | 67861845 | .         | C | T | . | PASS | .         | inter NM_dis |          |
| ACa04 | 5 | 69716102 | .         | G | C | . | PASS | GTF2H2    | ncR NR_      | .        |
| ACa04 | 5 | 70503586 | rs2848141 | C | T | . | PASS | .         | inter NR_dis |          |
| ACa04 | 5 | 74011331 | .         | C | T | . | PASS | HEXB      | splice NM_NV |          |
| ACa04 | 5 | 74012431 | .         | C | T | . | PASS | HEXB      | exon NM_     | stopgain |
| ACa04 | 5 | 1.19E+08 | .         | C | T | . | PASS | HSD17E1   | exon NM_     | missense |
| ACa04 | 5 | 1.4E+08  | .         | C | A | . | PASS | HARS      | intron NM_   | .        |
| ACa04 | 5 | 1.4E+08  | .         | C | A | . | PASS | HARS      | intron NM_   | .        |
| ACa04 | 5 | 1.51E+08 | rs1024566 | A | C | . | PASS | G3BP1     | intron NM_   | .        |
| ACa04 | 5 | 1.51E+08 | .         | C | T | . | PASS | GLRA1     | intron NM_   | .        |
| ACa04 | 5 | 1.57E+08 | .         | G | C | . | PASS | ADAM10    | intron NM_   | .        |
| ACa04 | 5 | 1.58E+08 | .         | G | A | . | PASS | EBF1      | intron NM_   | .        |
| ACa04 | 5 | 1.68E+08 | rs5341551 | G | A | . | PASS | TENM2     | intron NM_   | .        |
| ACa04 | 5 | 1.76E+08 | .         | C | T | . | PASS | EIF4E1L   | intron NM_   | .        |
| ACa04 | 5 | 1.79E+08 | .         | G | C | . | PASS | CBY3      | exon NM_     | synonym  |
| ACa04 | 6 | 335156   | rs2013466 | C | G | . | PASS | DUSP2     | exon NM_     | missense |
| ACa04 | 6 | 3138326  | .         | C | G | . | PASS | BPHL      | intron NM_   | .        |
| ACa04 | 6 | 4892397  | .         | C | G | . | PASS | CDYL      | exon NM_     | missense |
| ACa04 | 6 | 26158679 | rs7489137 | G | A | . | PASS | HIST1H1A  | exon NM_     | synonym  |
| ACa04 | 6 | 27279024 | .         | C | T | . | PASS | POM121    | exon NM_     | missense |
| ACa04 | 6 | 27279395 | .         | C | G | . | PASS | POM121    | exon NM_     | missense |
| ACa04 | 6 | 28255115 | rs9402071 | C | T | . | PASS | PGBD1     | intron NM_   | .        |
| ACa04 | 6 | 30627926 | .         | G | C | . | PASS | DHX16     | exon NM_     | synonym  |
| ACa04 | 6 | 30629422 | .         | G | C | . | PASS | DHX16     | intron NM_   | .        |
| ACa04 | 6 | 31239998 | .         | G | A | . | PASS | .         | upsilon NM_  | .        |
| ACa04 | 6 | 31544686 | .         | G | A | . | PASS | TNF       | intron NM_   | .        |
| ACa04 | 6 | 31868501 | .         | G | A | . | PASS | ZBTB12    | exon NM_     | synonym  |
| ACa04 | 6 | 31948488 | .         | C | T | . | PASS | STK19     | exon NM_     | missense |
| ACa04 | 6 | 31973995 | rs5421901 | C | T | . | PASS | CYP21A2   | ncR NR_      | .        |
| ACa04 | 6 | 31974685 | .         | C | T | . | PASS | CYP21A2   | exon NM_     | unknown  |
| ACa04 | 6 | 31974901 | .         | C | T | . | PASS | CYP21A2   | ncR NR_      | .        |
| ACa04 | 6 | 36341267 | .         | C | A | . | PASS | ETV7      | exon NM_     | synonym  |

|       |   |          |           |   |   |   |      |                   |               |   |
|-------|---|----------|-----------|---|---|---|------|-------------------|---------------|---|
| ACa04 | 6 | 37420800 | .         | T | G | . | PASS | CMTR1 intrc NM_   | .             | . |
| ACa04 | 6 | 44279287 | rs3746609 | A | C | . | PASS | AARS2 intrc NM_   | .             | . |
| ACa04 | 6 | 46826299 | rs5482384 | C | T | . | PASS | GPR116 exo  NM_   | missens       |   |
| ACa04 | 6 | 50011361 | rs1442276 | G | A | . | PASS | DEFB11 exo  NM_   | missens       |   |
| ACa04 | 6 | 80737801 | rs9008212 | C | G | . | PASS | TTK intrc NM_     | .             | . |
| ACa04 | 6 | 90562798 | .         | C | T | . | PASS | CASP8 intrc NM_   | .             | . |
| ACa04 | 6 | 1.1E+08  | rs7466151 | C | T | . | PASS | AK9 intrc NM_     | .             | . |
| ACa04 | 6 | 1.19E+08 | .         | C | T | . | PASS | CEP85L exo  NM_   | missens       |   |
| ACa04 | 6 | 1.54E+08 | rs5411063 | G | A | . | PASS | .                 | inte  NM_ dis | . |
| ACa04 | 6 | 1.6E+08  | .         | G | C | . | PASS | LOC100 ncR NR_    | .             | . |
| ACa04 | 7 | 1513164  | rs3695415 | G | A | . | PASS | INTS1 intrc NM_   | .             | . |
| ACa04 | 7 | 4829784  | rs9183664 | C | T | . | PASS | AP5Z1 intrc NM_   | .             | . |
| ACa04 | 7 | 7106766  | .         | G | T | . | PASS | .                 | inte  NM_ dis | . |
| ACa04 | 7 | 29742438 | .         | C | T | . | PASS | .                 | inte  NR_ dis | . |
| ACa04 | 7 | 45016694 | rs1485954 | C | T | . | PASS | MYO1G intrc NM_   | .             | . |
| ACa04 | 7 | 56881682 | rs3677059 | G | A | . | PASS | .                 | inte  NR_ dis | . |
| ACa04 | 7 | 56886709 | .         | C | G | . | PASS | .                 | inte  NR_ dis | . |
| ACa04 | 7 | 56886816 | .         | A | T | . | PASS | .                 | inte  NR_ dis | . |
| ACa04 | 7 | 56891472 | .         | T | C | . | PASS | .                 | inte  NR_ dis | . |
| ACa04 | 7 | 62956286 | rs2018986 | T | C | . | PASS | .                 | inte  NR_ dis | . |
| ACa04 | 7 | 63040357 | rs1860492 | C | T | . | PASS | .                 | inte  NR_ dis | . |
| ACa04 | 7 | 63216281 | .         | C | A | . | PASS | .                 | inte  NR_ dis | . |
| ACa04 | 7 | 63219061 | .         | G | C | . | PASS | .                 | inte  NR_ dis | . |
| ACa04 | 7 | 66648249 | rs2687038 | T | C | . | PASS | TYW1 intrc NM_    | .             | . |
| ACa04 | 7 | 70881071 | .         | A | C | . | PASS | WBSCF intrc NM_   | .             | . |
| ACa04 | 7 | 75240989 | .         | G | T | . | PASS | HIP1 intrc NM_    | .             | . |
| ACa04 | 7 | 97558116 | .         | A | G | . | PASS | .                 | inte  NM_ dis | . |
| ACa04 | 7 | 1E+08    | rs3730249 | G | A | . | PASS | SRRT intrc NM_    | .             | . |
| ACa04 | 7 | 1.28E+08 | rs3721622 | G | A | . | PASS | RBM28 exo  NM_    | missens       |   |
| ACa04 | 7 | 1.28E+08 | .         | G | C | . | PASS | RBM28 exo  NM_    | missens       |   |
| ACa04 | 7 | 1.29E+08 | rs1030263 | C | T | . | PASS | KCP intrc NM_     | .             | . |
| ACa04 | 7 | 1.42E+08 | .         | C | T | . | PASS | .                 | inte  NM_ dis | . |
| ACa04 | 7 | 1.49E+08 | .         | G | C | . | PASS | EZH2 intrc NM_    | .             | . |
| ACa04 | 7 | 1.52E+08 | rs8678229 | G | T | . | PASS | KMT2C intrc NM_   | .             | . |
| ACa04 | 8 | 7438248  | .         | G | A | . | PASS | .                 | inte  NR_ dis | . |
| ACa04 | 8 | 7468775  | rs6264068 | C | T | . | PASS | .                 | inte  NR_ dis | . |
| ACa04 | 8 | 11410882 | .         | G | A | . | PASS | BLK intrc NM_     | .             | . |
| ACa04 | 8 | 12045755 | .         | A | G | . | PASS | FAM86E intrc NM_  | .             | . |
| ACa04 | 8 | 12293612 | .         | G | A | . | PASS | FAM86E intrc NM_  | .             | . |
| ACa04 | 8 | 23104273 | rs7607907 | C | T | . | PASS | CHMP7 exo  NM_    | missens       |   |
| ACa04 | 8 | 32406297 | .         | G | A | . | PASS | NRG1 exo  NM_     | missens       |   |
| ACa04 | 8 | 37732570 | rs3736343 | G | A | . | PASS | RAB11F exo  NM_   | missens       |   |
| ACa04 | 8 | 54628641 | .         | C | T | . | PASS | ATP6V1 intrc NM_  | .             | . |
| ACa04 | 8 | 73937164 | .         | G | A | . | PASS | TERF1 exo  NM_    | synonym       |   |
| ACa04 | 8 | 80677293 | rs9872967 | T | A | . | PASS | HEY1 UTF NM_ NM_  | .             | . |
| ACa04 | 8 | 89497390 | .         | G | A | . | PASS | .                 | inte  NM_ dis | . |
| ACa04 | 8 | 90426559 | .         | G | A | . | PASS | .                 | inte  NM_ dis | . |
| ACa04 | 8 | 91586038 | .         | T | A | . | PASS | .                 | inte  NR_ dis | . |
| ACa04 | 8 | 1.01E+08 | .         | G | C | . | PASS | RGS22 intrc NM_   | .             | . |
| ACa04 | 8 | 1.14E+08 | .         | G | A | . | PASS | CSMD3 intrc NM_   | .             | . |
| ACa04 | 8 | 1.21E+08 | .         | G | T | . | PASS | TAF2 exo  NM_     | missens       |   |
| ACa04 | 8 | 1.24E+08 | .         | G | A | . | PASS | .                 | inte  NR_ dis | . |
| ACa04 | 8 | 1.26E+08 | rs1436548 | G | C | . | PASS | KIAA019 exo  NM_  | missens       |   |
| ACa04 | 8 | 1.26E+08 | .         | G | C | . | PASS | KIAA019 intrc NM_ | .             | . |

|       |    |          |           |   |   |   |      |        |       |     |          |   |
|-------|----|----------|-----------|---|---|---|------|--------|-------|-----|----------|---|
| ACa04 | 8  | 1.41E+08 | .         | G | A | . | PASS | TRAPP6 | intrc | NM_ | .        | . |
| ACa04 | 9  | 14997152 | .         | C | T | . | PASS | LOC389 | ncR   | NR_ | .        | . |
| ACa04 | 9  | 19078284 | rs7682516 | C | T | . | PASS | HAUS6  | exo   | NM_ | missens  |   |
| ACa04 | 9  | 21077312 | .         | C | T | . | PASS | IFNB1  | exo   | NM_ | missens  |   |
| ACa04 | 9  | 33923025 | .         | G | C | . | PASS | UBAP2  | exo   | NM_ | stopgair |   |
| ACa04 | 9  | 39144453 | rs3764507 | T | C | . | PASS | CNTNA  | intrc | NM_ | .        | . |
| ACa04 | 9  | 45733695 | .         | C | G | . | PASS | LOC102 | inte  | NR_ | dis      | . |
| ACa04 | 9  | 67786147 | .         | G | C | . | PASS | FAM27E | ncR   | NR_ | .        | . |
| ACa04 | 9  | 69452504 | .         | G | A | . | PASS | .      | inte  | NM_ | dis      | . |
| ACa04 | 9  | 72832084 | .         | C | G | . | PASS | SMC5-A | ncR   | NR_ | .        | . |
| ACa04 | 9  | 79946883 | .         | C | G | . | PASS | VPS13A | intrc | NM_ | .        | . |
| ACa04 | 9  | 82336825 | .         | T | G | . | PASS | TLE4   | intrc | NM_ | .        | . |
| ACa04 | 9  | 98678009 | .         | G | C | . | PASS | ERCC6l | exo   | NM_ | missens  |   |
| ACa04 | 9  | 1.15E+08 | rs9619494 | C | T | . | PASS | HSDL2  | splie | NM_ | NM_      | . |
| ACa04 | 9  | 1.25E+08 | .         | C | T | . | PASS | DAB2IP | exo   | NM_ | synonyr  |   |
| ACa04 | 9  | 1.29E+08 | .         | G | A | . | PASS | LMX1B  | exo   | NM_ | synonyr  |   |
| ACa04 | 9  | 1.31E+08 | .         | G | A | . | PASS | CERCA  | intrc | NM_ | .        | . |
| ACa04 | 9  | 1.32E+08 | rs7589091 | C | T | . | PASS | IER5L  | UTF   | NM_ | NM_      | . |
| ACa04 | 9  | 1.33E+08 | .         | C | A | . | PASS | GPR107 | splie | NM_ | NM_      | . |
| ACa04 | 9  | 1.34E+08 | .         | G | T | . | PASS | RAPGE  | intrc | NM_ | .        | . |
| ACa04 | 9  | 1.4E+08  | .         | C | T | . | PASS | .      | inte  | NM_ | dis      | . |
| ACa04 | 9  | 1.4E+08  | .         | C | T | . | PASS | PNPLA7 | exo   | NM_ | unknow   |   |
| ACa04 | 10 | 11971934 | .         | C | A | . | PASS | UPF2   | exo   | NM_ | stopgair |   |
| ACa04 | 10 | 21805480 | rs2018361 | T | C | . | PASS | SKIDA1 | exo   | NM_ | synonyr  |   |
| ACa04 | 10 | 45487624 | .         | T | G | . | PASS | RASSF4 | intrc | NM_ | .        | . |
| ACa04 | 10 | 45487625 | .         | T | G | . | PASS | RASSF4 | intrc | NM_ | .        | . |
| ACa04 | 10 | 71025668 | .         | G | T | . | PASS | HKDC1  | intrc | NM_ | .        | . |
| ACa04 | 10 | 71026465 | rs3760330 | G | A | . | PASS | HKDC1  | exo   | NM_ | synonyr  |   |
| ACa04 | 10 | 71027074 | .         | G | A | . | PASS | HKDC1  | UTF   | NM_ | NM_      | . |
| ACa04 | 10 | 73039805 | .         | G | C | . | PASS | UNC5B  | splie | NM_ | NM_      | . |
| ACa04 | 10 | 73053568 | rs7593379 | G | A | . | PASS | UNC5B  | exo   | NM_ | missens  |   |
| ACa04 | 10 | 73330675 | rs7698966 | G | A | . | PASS | CDH23  | exo   | NM_ | synonyr  |   |
| ACa04 | 10 | 81292524 | .         | C | T | . | PASS | .      | inte  | NM_ | dis      | . |
| ACa04 | 10 | 81292525 | .         | A | G | . | PASS | .      | inte  | NM_ | dis      | . |
| ACa04 | 10 | 94409977 | .         | C | G | . | PASS | KIF11  | intrc | NM_ | .        | . |
| ACa04 | 10 | 1.05E+08 | .         | G | A | . | PASS | PDCD1  | intrc | NM_ | .        | . |
| ACa04 | 10 | 1.24E+08 | .         | G | A | . | PASS | PLEKH7 | intrc | NM_ | .        | . |
| ACa04 | 10 | 1.35E+08 | rs7966467 | A | G | . | PASS | .      | inte  | NM_ | dis      | . |
| ACa04 | 11 | 1026075  | rs7657851 | G | A | . | PASS | MUC6   | exo   | NM_ | synonyr  |   |
| ACa04 | 11 | 4351281  | rs8667539 | C | G | . | PASS | .      | inte  | NR_ | dis      | . |
| ACa04 | 11 | 9990085  | .         | G | A | . | PASS | SBF2   | exo   | NM_ | missens  |   |
| ACa04 | 11 | 25004735 | .         | C | T | . | PASS | LUZP2  | exo   | NM_ | stopgair |   |
| ACa04 | 11 | 32456855 | .         | C | T | . | PASS | WT1    | exo   | NM_ | missens  |   |
| ACa04 | 11 | 46397105 | .         | A | G | . | PASS | DGKZ   | exo   | NM_ | missens  |   |
| ACa04 | 11 | 47194231 | .         | G | T | . | PASS | ARFGA1 | intrc | NM_ | .        | . |
| ACa04 | 11 | 56229791 | .         | C | A | . | PASS | .      | dow   | NM_ | .        | . |
| ACa04 | 11 | 61249334 | rs7463740 | C | T | . | PASS | PPP1R3 | exo   | NM_ | missens  |   |
| ACa04 | 11 | 61687361 | .         | T | G | . | PASS | RAB3IL | intrc | NM_ | .        | . |
| ACa04 | 11 | 63033390 | .         | C | T | . | PASS | MIR368 | ncR   | NR_ | .        | . |
| ACa04 | 11 | 63681628 | rs3704854 | C | T | . | PASS | RCOR2  | exo   | NM_ | missens  |   |
| ACa04 | 11 | 63992577 | .         | C | G | . | PASS | TRPT1  | intrc | NM_ | .        | . |
| ACa04 | 11 | 63995110 | .         | C | G | . | PASS | NUDT2  | exo   | NM_ | missens  |   |
| ACa04 | 11 | 64004869 | .         | G | T | . | PASS | VEGFB  | intrc | NM_ | .        | . |
| ACa04 | 11 | 64010930 | .         | G | A | . | PASS | FKBP2  | exo   | NM_ | missens  |   |



|       |    |          |           |   |   |   |      |         |       |     |          |         |
|-------|----|----------|-----------|---|---|---|------|---------|-------|-----|----------|---------|
| ACa04 | 11 | 64011526 | .         | G | A | . | PASS | FKBP2   | UTF   | NM_ | NM_      | .       |
| ACa04 | 11 | 64119499 | .         | C | T | . | PASS | CCDC8   | intrc | NM_ | .        | .       |
| ACa04 | 11 | 65315334 | rs7459229 | C | T | . | PASS | LTBP3   | intrc | NM_ | .        | .       |
| ACa04 | 11 | 73997380 | .         | C | G | . | PASS | P4HA3   | exo   | NM_ | missens  | .       |
| ACa04 | 11 | 1.13E+08 | .         | G | A | . | PASS | NCAM1   | intrc | NM_ | .        | .       |
| ACa04 | 11 | 1.17E+08 | rs3521580 | T | C | . | PASS | PCSK7   | intrc | NM_ | .        | .       |
| ACa04 | 11 | 1.17E+08 | rs3580670 | C | T | . | PASS | PCSK7   | intrc | NM_ | .        | .       |
| ACa04 | 11 | 1.25E+08 | rs9203240 | C | T | . | PASS | HEPAC   | UTF   | NM_ | NM_      | .       |
| ACa04 | 11 | 1.3E+08  | .         | C | T | . | PASS | ZBTB44  | exo   | NM_ | missens  | .       |
| ACa04 | 12 | 7031400  | .         | C | G | . | PASS | ENO2    | intrc | NM_ | .        | .       |
| ACa04 | 12 | 7031852  | .         | C | T | . | PASS | ENO2    | intrc | NM_ | .        | .       |
| ACa04 | 12 | 8234860  | .         | C | T | . | PASS | NECAP   | UTF   | NM_ | NM_      | .       |
| ACa04 | 12 | 31242999 | rs7123030 | G | A | . | PASS | DDX11   | exo   | NM_ | missens  | .       |
| ACa04 | 12 | 32135759 | .         | G | A | . | PASS | KIAA15  | !     | exo | NM_      | missens |
| ACa04 | 12 | 41585427 | .         | G | C | . | PASS | PDZRN   | intrc | NM_ | .        | .       |
| ACa04 | 12 | 46321767 | .         | C | G | . | PASS | SCAF11  | exo   | NM_ | missens  | .       |
| ACa04 | 12 | 58158669 | .         | C | T | . | PASS | CYP27E  | exo   | NM_ | missens  | .       |
| ACa04 | 12 | 58160118 | .         | C | G | . | PASS | CYP27E  | intrc | NM_ | .        | .       |
| ACa04 | 12 | 63153019 | rs8674713 | G | A | . | PASS | PPM1H   | intrc | NM_ | .        | .       |
| ACa04 | 12 | 68709753 | rs9109827 | C | T | . | PASS | MDM1    | intrc | NM_ | .        | .       |
| ACa04 | 12 | 80848802 | rs9642294 | C | T | . | PASS | PTPRQ   | intrc | NM_ | .        | .       |
| ACa04 | 12 | 88429683 | .         | T | G | . | PASS | C12orf2 | intrc | NM_ | .        | .       |
| ACa04 | 12 | 94132221 | .         | C | A | . | PASS | CRADD   | intrc | NM_ | .        | .       |
| ACa04 | 12 | 1.02E+08 | .         | G | C | . | PASS | MYBPC   | exo   | NM_ | missens  | .       |
| ACa04 | 12 | 1.14E+08 | .         | C | T | . | PASS | RBM19   | intrc | NM_ | .        | .       |
| ACa04 | 12 | 1.16E+08 | .         | C | T | . | PASS | MED13l  | exo   | NM_ | synonyr  | .       |
| ACa04 | 12 | 1.21E+08 | .         | G | A | . | PASS | GCN1L   | intrc | NM_ | .        | .       |
| ACa04 | 12 | 1.21E+08 | rs7540482 | G | A | . | PASS | PLA2G1  | intrc | NM_ | .        | .       |
| ACa04 | 12 | 1.24E+08 | .         | G | A | . | PASS | SBNO1   | intrc | NM_ | .        | .       |
| ACa04 | 12 | 1.33E+08 | .         | C | G | . | PASS | EP400   | intrc | NM_ | .        | .       |
| ACa04 | 13 | 21244946 | .         | A | C | . | PASS | IFT88   | intrc | NM_ | .        | .       |
| ACa04 | 13 | 35716455 | .         | G | C | . | PASS | NBEA    | exo   | NM_ | missens  | .       |
| ACa04 | 13 | 43462522 | .         | G | C | . | PASS | EPSTI1  | exo   | NM_ | stopgair | .       |
| ACa04 | 13 | 99554177 | .         | C | A | . | PASS | DOCK9   | intrc | NM_ | .        | .       |
| ACa04 | 13 | 1.03E+08 | rs7720033 | G | T | . | PASS | FGF14   | exo   | NM_ | synonyr  | .       |
| ACa04 | 14 | 19750514 | rs1450473 | C | T | . | PASS | .       | inte  | NR_ | dis      | .       |
| ACa04 | 14 | 22237385 | .         | A | C | . | PASS | .       | inte  | NM_ | dis      | .       |
| ACa04 | 14 | 24422863 | .         | G | A | . | PASS | DHRS4   | ncR   | NR_ | .        | .       |
| ACa04 | 14 | 24423433 | .         | G | A | . | PASS | DHRS4   | ncR   | NR_ | .        | .       |
| ACa04 | 14 | 38218126 | .         | C | T | . | PASS | .       | inte  | NM_ | dis      | .       |
| ACa04 | 14 | 50033101 | .         | G | C | . | PASS | .       | inte  | NR_ | dis      | .       |
| ACa04 | 14 | 55326401 | rs1501582 | C | T | . | PASS | GCH1    | exo   | NM_ | synonyr  | .       |
| ACa04 | 14 | 60427856 | .         | C | A | . | PASS | LRRC9   | ncR   | NR_ | .        | .       |
| ACa04 | 14 | 65488560 | .         | C | A | . | PASS | MAX,Ct  | intrc | NM_ | .        | .       |
| ACa04 | 14 | 65488830 | .         | C | A | . | PASS | MAX,Ct  | intrc | NM_ | .        | .       |
| ACa04 | 14 | 70346418 | rs7676169 | G | A | . | PASS | SMOC1   | exo   | NM_ | missens  | .       |
| ACa04 | 14 | 73718454 | .         | C | T | . | PASS | PAPLN   | exo   | NM_ | synonyr  | .       |
| ACa04 | 14 | 77257611 | .         | G | A | . | PASS | ANGEL   | intrc | NM_ | .        | .       |
| ACa04 | 14 | 89591578 | .         | G | C | . | PASS | .       | inte  | NM_ | dis      | .       |
| ACa04 | 14 | 93177988 | .         | G | A | . | PASS | LGMN    | intrc | NM_ | .        | .       |
| ACa04 | 14 | 95111247 | rs3756754 | G | A | . | PASS | SERPIN  | ncR   | NR_ | .        | .       |
| ACa04 | 14 | 1.06E+08 | .         | T | G | . | PASS | MTA1    | intrc | NM_ | .        | .       |
| ACa04 | 14 | 1.06E+08 | rs5537870 | G | A | . | PASS | .       | inte  | NR_ | dis      | .       |
| ACa04 | 14 | 1.07E+08 | rs1289410 | G | A | . | PASS | .       | inte  | NR_ | dis      | .       |

|       |    |          |           |   |   |   |      |        |              |
|-------|----|----------|-----------|---|---|---|------|--------|--------------|
| ACa04 | 15 | 21021529 | .         | C | T | . | PASS | .      | inte NR_dis. |
| ACa04 | 15 | 23105942 | .         | C | A | . | PASS | LOC283 | ncR NR_.     |
| ACa04 | 15 | 28408339 | rs5409237 | C | T | . | PASS | HERC2  | exo NM_.     |
| ACa04 | 15 | 28649661 | .         | T | G | . | PASS | .      | inte NR_dis. |
| ACa04 | 15 | 29064347 | .         | T | G | . | PASS | PDCD6l | ncR NR_.     |
| ACa04 | 15 | 30874998 | .         | T | C | . | PASS | ULK4P1 | ncR NR_.     |
| ACa04 | 15 | 31089768 | rs2015085 | C | A | . | PASS | .      | inte NR_dis. |
| ACa04 | 15 | 41822216 | rs7481072 | C | T | . | PASS | RPAP1  | intrc NM_.   |
| ACa04 | 15 | 41827886 | .         | C | T | . | PASS | RPAP1  | intrc NM_.   |
| ACa04 | 15 | 41828755 | .         | C | G | . | PASS | RPAP1  | exo NM_.     |
| ACa04 | 15 | 42154421 | rs7754448 | G | A | . | PASS | SPTBN1 | exo NM_.     |
| ACa04 | 15 | 43927718 | .         | G | T | . | PASS | CATSP1 | intrc NM_.   |
| ACa04 | 15 | 44100887 | rs1922871 | C | T | . | PASS | MFAP1  | intrc NM_.   |
| ACa04 | 15 | 44849933 | .         | C | T | . | PASS | EIF3J  | intrc NM_.   |
| ACa04 | 15 | 45120967 | rs6202600 | G | A | . | PASS | .      | inte NM_dis. |
| ACa04 | 15 | 45697652 | .         | G | A | . | PASS | SPATA1 | exo NM_.     |
| ACa04 | 15 | 56390588 | .         | G | A | . | PASS | RFX7   | intrc NM_.   |
| ACa04 | 15 | 60678134 | .         | C | T | . | PASS | ANXA2  | intrc NM_.   |
| ACa04 | 15 | 65041446 | rs5478938 | C | T | . | PASS | RBPMS  | intrc NM_.   |
| ACa04 | 15 | 66774038 | .         | C | A | . | PASS | MAP2K1 | intrc NM_.   |
| ACa04 | 15 | 67920461 | .         | G | C | . | PASS | MAP2K1 | intrc NM_.   |
| ACa04 | 15 | 74468572 | .         | G | A | . | PASS | ISLR   | UTF NM_NV.   |
| ACa04 | 15 | 75518573 | .         | C | T | . | PASS | .      | inte NM_dis. |
| ACa04 | 15 | 78922067 | .         | C | T | . | PASS | CHRNA2 | exo NM_.     |
| ACa04 | 15 | 79586294 | .         | C | G | . | PASS | ANKRD  | exo NM_.     |
| ACa04 | 15 | 84924696 | rs2401418 | T | C | . | PASS | .      | inte NM_dis. |
| ACa04 | 15 | 89828324 | .         | C | T | . | PASS | FANCI  | splic NM_NV. |
| ACa04 | 15 | 91551123 | .         | C | G | . | PASS | VPS33E | exo NM_.     |
| ACa04 | 15 | 94884003 | .         | C | G | . | PASS | MCTP2  | intrc NM_.   |
| ACa04 | 15 | 1E+08    | .         | C | T | . | PASS | MEF2A  | intrc NM_.   |
| ACa04 | 15 | 1.02E+08 | rs7510253 | C | T | . | PASS | TARSL2 | exo NM_.     |
| ACa04 | 16 | 138813   | rs7504825 | G | A | . | PASS | NPRL3  | exo NM_.     |
| ACa04 | 16 | 1498194  | .         | C | T | . | PASS | CLCN7  | intrc NM_.   |
| ACa04 | 16 | 7703685  | .         | G | A | . | PASS | RBFOX  | intrc NM_.   |
| ACa04 | 16 | 10775977 | .         | G | A | . | PASS | TEKT5  | exo NM_.     |
| ACa04 | 16 | 12061615 | .         | C | T | . | PASS | TNFRSF | exo NM_.     |
| ACa04 | 16 | 14932478 | .         | G | A | . | PASS | NOMO1  | intrc NM_.   |
| ACa04 | 16 | 15460754 | rs5522924 | C | T | . | PASS | NPIPA5 | intrc NM_.   |
| ACa04 | 16 | 16465395 | rs6203288 | T | C | . | PASS | .      | inte NR_dis. |
| ACa04 | 16 | 18840681 | rs7654396 | C | T | . | PASS | SMG1   | exo NM_.     |
| ACa04 | 16 | 22274612 | .         | G | A | . | PASS | EEF2K  | intrc NM_.   |
| ACa04 | 16 | 22314516 | .         | C | T | . | PASS | POLR3f | intrc NM_.   |
| ACa04 | 16 | 22492403 | .         | A | G | . | PASS | SMG1P  | ncR NR_.     |
| ACa04 | 16 | 28181173 | .         | C | G | . | PASS | XPO6   | exo NM_.     |
| ACa04 | 16 | 28188845 | .         | G | A | . | PASS | XPO6   | intrc NM_.   |
| ACa04 | 16 | 29634159 | .         | G | A | . | PASS | .      | inte NR_dis. |
| ACa04 | 16 | 30777461 | .         | T | A | . | PASS | RNF40  | intrc NM_.   |
| ACa04 | 16 | 31283023 | .         | C | T | . | PASS | ITGAM  | intrc NM_.   |
| ACa04 | 16 | 33393614 | rs7896651 | A | C | . | PASS | .      | inte NR_dis. |
| ACa04 | 16 | 48311245 | rs7515102 | C | G | . | PASS | LONP2  | splic NM_NV. |
| ACa04 | 16 | 58571009 | .         | C | T | . | PASS | CNOT1  | exo NM_.     |
| ACa04 | 16 | 67650756 | .         | C | G | . | PASS | CTCF   | exo NM_.     |
| ACa04 | 16 | 71917174 | .         | T | A | . | PASS | ZNF821 | UTF NM_NV.   |
| ACa04 | 16 | 74366694 | rs2911030 | A | G | . | PASS | LOC283 | ncR NR_.     |

|       |    |          |           |   |   |   |      |        |                    |
|-------|----|----------|-----------|---|---|---|------|--------|--------------------|
| ACa04 | 16 | 89748999 | .         | G | A | . | PASS | .      | inte  NM_ dis.     |
| ACa04 | 16 | 90239923 | .         | C | T | . | PASS | .      | ncR NR_ .          |
| ACa04 | 17 | 3819296  | rs7805194 | C | T | . | PASS | P2RX1  | intrc NM_ .        |
| ACa04 | 17 | 6905777  | .         | C | T | . | PASS | ALOX12 | ncR NR_ .          |
| ACa04 | 17 | 7452538  | .         | C | G | . | PASS | TNFSF1 | exo  NM_ missens   |
| ACa04 | 17 | 7644304  | .         | C | T | . | PASS | DNAH2  | exo  NM_ synonymr  |
| ACa04 | 17 | 10261063 | .         | A | G | . | PASS | MYH13  | exo  NM_ missens   |
| ACa04 | 17 | 11502002 | .         | G | C | . | PASS | DNAH9  | exo  NM_ missens   |
| ACa04 | 17 | 15905433 | rs5595610 | G | A | . | PASS | TTC19  | intrc NM_ .        |
| ACa04 | 17 | 17715857 | .         | C | G | . | PASS | SREBF  | UTF NM_ NM.        |
| ACa04 | 17 | 18580745 | .         | G | C | . | PASS | ZNF286 | intrc NM_ .        |
| ACa04 | 17 | 20239326 | .         | C | T | . | PASS | CCDC1  | ncR NR_ .          |
| ACa04 | 17 | 20361478 | .         | G | A | . | PASS | LGALS  | intrc NM_ .        |
| ACa04 | 17 | 21904546 | rs7841783 | G | A | . | PASS | FLJ360 | (ncR NR_ .         |
| ACa04 | 17 | 27051414 | .         | C | T | . | PASS | TLCD1  | UTF NM_ NM.        |
| ACa04 | 17 | 27186144 | .         | G | C | . | PASS | ERAL1  | intrc NM_ .        |
| ACa04 | 17 | 27188767 | .         | G | A | . | PASS | .      | ups  NR_ .         |
| ACa04 | 17 | 30267462 | .         | C | G | . | PASS | SUZ12  | exo  NM_ missens   |
| ACa04 | 17 | 30267521 | .         | C | A | . | PASS | SUZ12  | intrc NM_ .        |
| ACa04 | 17 | 30509668 | .         | G | C | . | PASS | RHOT1  | intrc NM_ .        |
| ACa04 | 17 | 34585113 | .         | G | T | . | PASS | LOC101 | intrc NM_ .        |
| ACa04 | 17 | 34585273 | rs8795183 | C | T | . | PASS | TBC1D  | intrc NM_ .        |
| ACa04 | 17 | 34959090 | .         | G | A | . | PASS | MRM1   | intrc NM_ .        |
| ACa04 | 17 | 35696532 | .         | G | C | . | PASS | ACACA  | intrc NM_ .        |
| ACa04 | 17 | 35879278 | .         | G | A | . | PASS | SYNRG  | intrc NM_ .        |
| ACa04 | 17 | 36349424 | .         | C | A | . | PASS | .      | ups  NM_ .         |
| ACa04 | 17 | 37564752 | .         | G | C | . | PASS | MED1   | exo  NM_ missens   |
| ACa04 | 17 | 39563642 | rs1035039 | C | T | . | PASS | LOC10  | ncR NR_ .          |
| ACa04 | 17 | 40189689 | .         | G | A | . | PASS | ZNF385 | intrc NM_ .        |
| ACa04 | 17 | 42336474 | .         | C | T | . | PASS | SLC4A1 | intrc NM_ .        |
| ACa04 | 17 | 48456415 | .         | C | T | . | PASS | EME1   | intrc NM_ .        |
| ACa04 | 17 | 48695858 | .         | C | T | . | PASS | CACNA  | intrc NM_ .        |
| ACa04 | 17 | 56382745 | .         | C | G | . | PASS | BZRAP  | ' splic NM_ NM.    |
| ACa04 | 17 | 61875411 | .         | G | C | . | PASS | DDX42  | exo  NM_ missens   |
| ACa04 | 17 | 61875421 | .         | G | T | . | PASS | DDX42  | exo  NM_ missens   |
| ACa04 | 17 | 63685153 | .         | T | G | . | PASS | CEP112 | intrc NM_ .        |
| ACa04 | 17 | 73830621 | .         | G | C | . | PASS | UNC13I | intrc NM_ .        |
| ACa04 | 17 | 78210752 | rs1405528 | C | T | . | PASS | SLC26A | exo  NM_ synonymr  |
| ACa04 | 17 | 79077457 | .         | C | T | . | PASS | BAIAP2 | exo  NM_ synonymr  |
| ACa04 | 17 | 81180181 | rs3677917 | A | G | . | PASS | FLJ436 | (ncR NR_ .         |
| ACa04 | 18 | 6241463  | .         | G | C | . | PASS | L3MBTL | intrc NM_ .        |
| ACa04 | 18 | 7231454  | .         | G | A | . | PASS | LRRC3  | (exo  NM_ synonymr |
| ACa04 | 18 | 9561991  | .         | C | G | . | PASS | PPP4R  | ' exo  NM_ missens |
| ACa04 | 18 | 9885754  | .         | G | C | . | PASS | TXNDC  | UTF NM_ NM.        |
| ACa04 | 18 | 10682288 | .         | C | G | . | PASS | PIEZO2 | exo  NM_ missens   |
| ACa04 | 18 | 13734582 | .         | G | A | . | PASS | RNMT   | exo  NM_ missens   |
| ACa04 | 18 | 14186351 | .         | C | T | . | PASS | ANKRD  | ncR NR_ .          |
| ACa04 | 18 | 24173671 | .         | G | T | . | PASS | KCTD1  | intrc NM_ .        |
| ACa04 | 18 | 44773328 | .         | C | T | . | PASS | SKOR2  | exo  NM_ missens   |
| ACa04 | 18 | 53252369 | .         | G | A | . | PASS | TCF4   | intrc NM_ .        |
| ACa04 | 18 | 53695975 | .         | C | T | . | PASS | .      | inte  NR_ dis.     |
| ACa04 | 18 | 60027077 | rs7468202 | C | T | . | PASS | TNFRS1 | intrc NM_ .        |
| ACa04 | 18 | 66564563 | .         | G | A | . | PASS | CCDC1  | (exo  NM_ synonymr |
| ACa04 | 18 | 77132914 | .         | A | G | . | PASS | ATP9B  | intrc NM_ .        |

|       |    |          |           |   |   |   |      |        |                   |     |          |
|-------|----|----------|-----------|---|---|---|------|--------|-------------------|-----|----------|
| ACa04 | 19 | 544031   | rs9545783 | C | T | . | PASS | .      | ups <sup>i</sup>  | NM_ | .        |
| ACa04 | 19 | 1067640  | .         | G | A | . | PASS | HMHA1  | intrc             | NM_ | .        |
| ACa04 | 19 | 1068927  | .         | G | C | . | PASS | HMHA1  | intrc             | NM_ | .        |
| ACa04 | 19 | 1625821  | .         | G | T | . | PASS | TCF3   | intrc             | NM_ | .        |
| ACa04 | 19 | 1627347  | rs3742787 | G | A | . | PASS | TCF3   | intrc             | NM_ | .        |
| ACa04 | 19 | 1923847  | rs1418930 | A | T | . | PASS | SCAMP  | intrc             | NM_ | .        |
| ACa04 | 19 | 2805172  | .         | G | T | . | PASS | THOP1  | exo <sup>i</sup>  | NM_ | stopgair |
| ACa04 | 19 | 2806807  | rs7627736 | G | A | . | PASS | THOP1  | intrc             | NM_ | .        |
| ACa04 | 19 | 3359586  | .         | C | T | . | PASS | NFIC   | UTF               | NM_ | NM_      |
| ACa04 | 19 | 4423978  | .         | G | C | . | PASS | CHAF17 | intrc             | NM_ | .        |
| ACa04 | 19 | 6161470  | .         | G | A | . | PASS | ACSBG  | intrc             | NM_ | .        |
| ACa04 | 19 | 7707610  | .         | T | A | . | PASS | STXBP2 | intrc             | NM_ | .        |
| ACa04 | 19 | 8430554  | .         | A | G | . | PASS | ANGPT1 | intrc             | NM_ | .        |
| ACa04 | 19 | 8444864  | .         | G | C | . | PASS | RAB11E | ncR               | NR_ | .        |
| ACa04 | 19 | 8604992  | .         | C | G | . | PASS | MYO1F  | intrc             | NM_ | .        |
| ACa04 | 19 | 9049466  | .         | G | T | . | PASS | MUC16  | exo <sup>i</sup>  | NM_ | stopgair |
| ACa04 | 19 | 9049499  | .         | G | A | . | PASS | MUC16  | exo <sup>i</sup>  | NM_ | missens  |
| ACa04 | 19 | 9071765  | .         | G | A | . | PASS | MUC16  | exo <sup>i</sup>  | NM_ | synonyr  |
| ACa04 | 19 | 9072600  | rs7741875 | G | A | . | PASS | MUC16  | exo <sup>i</sup>  | NM_ | missens  |
| ACa04 | 19 | 10812558 | .         | C | T | . | PASS | QTRT1  | intrc             | NM_ | .        |
| ACa04 | 19 | 12460871 | .         | G | C | . | PASS | ZNF442 | exo <sup>i</sup>  | NM_ | missens  |
| ACa04 | 19 | 12876605 | .         | G | A | . | PASS | HOOK2  | intrc             | NM_ | .        |
| ACa04 | 19 | 12902551 | .         | G | T | . | PASS | JUNB   | UTF               | NM_ | NM_      |
| ACa04 | 19 | 16890254 | .         | C | G | . | PASS | NWD1   | exo <sup>i</sup>  | NM_ | missens  |
| ACa04 | 19 | 17657528 | rs7797020 | G | A | . | PASS | FAM12C | exo <sup>i</sup>  | NM_ | missens  |
| ACa04 | 19 | 17989080 | .         | G | A | . | PASS | SLC5A5 | intrc             | NM_ | .        |
| ACa04 | 19 | 19643635 | .         | A | T | . | PASS | YJEFN3 | intrc             | NM_ | .        |
| ACa04 | 19 | 20002691 | .         | C | T | . | PASS | ZNF253 | exo <sup>i</sup>  | NM_ | missens  |
| ACa04 | 19 | 22379589 | .         | G | A | . | PASS | ZNF676 | UTF               | NM_ | NM_      |
| ACa04 | 19 | 30156809 | .         | C | G | . | PASS | PLEKHf | intrc             | NM_ | .        |
| ACa04 | 19 | 33302189 | .         | G | A | . | PASS | .      | inte <sup>i</sup> | NM_ | dis.     |
| ACa04 | 19 | 36108349 | .         | G | C | . | PASS | HAUS5  | intrc             | NM_ | .        |
| ACa04 | 19 | 36759849 | rs8683521 | T | G | . | PASS | .      | inte <sup>i</sup> | NM_ | dis.     |
| ACa04 | 19 | 36759850 | rs8793125 | T | C | . | PASS | .      | inte <sup>i</sup> | NM_ | dis.     |
| ACa04 | 19 | 37240872 | rs7653982 | C | T | . | PASS | ZNF850 | exo <sup>i</sup>  | NM_ | missens  |
| ACa04 | 19 | 39869313 | rs9896621 | C | T | . | PASS | SAMD4  | intrc             | NM_ | .        |
| ACa04 | 19 | 40370173 | .         | G | A | . | PASS | FCGBP  | intrc             | NM_ | .        |
| ACa04 | 19 | 42406617 | rs1408143 | C | T | . | PASS | ARHGE  | intrc             | NM_ | .        |
| ACa04 | 19 | 42558106 | .         | G | C | . | PASS | GRIK5  | intrc             | NM_ | .        |
| ACa04 | 19 | 42569637 | rs1444115 | C | T | . | PASS | GRIK5  | intrc             | NM_ | .        |
| ACa04 | 19 | 43349628 | .         | G | A | . | PASS | PSG10f | ncR               | NR_ | .        |
| ACa04 | 19 | 44156138 | .         | G | C | . | PASS | PLAUR  | intrc             | NM_ | .        |
| ACa04 | 19 | 44156387 | rs4251912 | G | A | . | PASS | PLAUR  | exo <sup>i</sup>  | NM_ | synonyr  |
| ACa04 | 19 | 46417852 | .         | C | G | . | PASS | NANOS  | exo <sup>i</sup>  | NM_ | missens  |
| ACa04 | 19 | 47545927 | .         | G | T | . | PASS | NPAS1  | intrc             | NM_ | .        |
| ACa04 | 19 | 50160962 | .         | C | A | . | PASS | SCAF1  | intrc             | NM_ | .        |
| ACa04 | 19 | 52496934 | .         | G | A | . | PASS | ZNF615 | exo <sup>i</sup>  | NM_ | synonyr  |
| ACa04 | 19 | 53059406 | .         | T | G | . | PASS | .      | dow               | NM_ | .        |
| ACa04 | 19 | 55344025 | .         | G | A | . | PASS | .      | ups <sup>i</sup>  | NM_ | .        |
| ACa04 | 19 | 55421386 | .         | G | C | . | PASS | NCR1   | exo <sup>i</sup>  | NM_ | missens  |
| ACa04 | 19 | 57641484 | .         | G | C | . | PASS | USP29  | exo <sup>i</sup>  | NM_ | missens  |
| ACa04 | 19 | 57641504 | .         | G | C | . | PASS | USP29  | exo <sup>i</sup>  | NM_ | missens  |
| ACa04 | 20 | 1569372  | .         | C | T | . | PASS | SIRPB1 | intrc             | NM_ | .        |
| ACa04 | 20 | 2378367  | .         | T | G | . | PASS | TGM6   | intrc             | NM_ | .        |

|       |    |          |           |   |   |   |      |        |       |     |          |
|-------|----|----------|-----------|---|---|---|------|--------|-------|-----|----------|
| ACa04 | 20 | 2575258  | .         | G | A | . | PASS | TMC2   | intrc | NM_ | .        |
| ACa04 | 20 | 3674136  | .         | G | A | . | PASS | SIGLEC | exo   | NM_ | missens  |
| ACa04 | 20 | 8722139  | rs7610831 | C | G | . | PASS | PLCB1  | exo   | NM_ | missens  |
| ACa04 | 20 | 17705827 | .         | C | G | . | PASS | BANF2  | intrc | NM_ | .        |
| ACa04 | 20 | 17943516 | .         | G | A | . | PASS | SNORD  | ncR   | NR_ | .        |
| ACa04 | 20 | 29623957 | rs8120738 | C | G | . | PASS | FRG1B  | ncR   | NR_ | .        |
| ACa04 | 20 | 29624070 | rs7791580 | G | A | . | PASS | FRG1B  | ncR   | NR_ | .        |
| ACa04 | 20 | 30640006 | .         | C | T | . | PASS | HCK    | UTF   | NM_ | NM_      |
| ACa04 | 20 | 33328131 | .         | C | G | . | PASS | NCOA6  | intrc | NM_ | .        |
| ACa04 | 20 | 33328684 | rs1904867 | C | T | . | PASS | NCOA6  | exo   | NM_ | missens  |
| ACa04 | 20 | 48562018 | .         | C | T | . | PASS | RNF114 | exo   | NM_ | stopgair |
| ACa04 | 20 | 53226961 | .         | C | T | . | PASS | DOK5   | exo   | NM_ | unknow   |
| ACa04 | 20 | 57767593 | .         | C | T | . | PASS | ZNF831 | exo   | NM_ | synonyr  |
| ACa04 | 20 | 60859560 | .         | G | T | . | PASS | OSBPL  | intrc | NM_ | .        |
| ACa04 | 20 | 61942626 | .         | G | A | . | PASS | COL20A | intrc | NM_ | .        |
| ACa04 | 20 | 62843563 | rs1874434 | G | A | . | PASS | MYT1   | intrc | NM_ | .        |
| ACa04 | 21 | 9873531  | .         | C | T | . | PASS | .      | inte  | NR_ | dis.     |
| ACa04 | 21 | 9892201  | .         | A | C | . | PASS | .      | inte  | NR_ | dis.     |
| ACa04 | 21 | 10139683 | .         | T | G | . | PASS | .      | inte  | NR_ | dis.     |
| ACa04 | 21 | 10624133 | rs3707796 | G | A | . | PASS | .      | inte  | NR_ | dis.     |
| ACa04 | 21 | 11058377 | rs7469658 | C | T | . | PASS | BAGE2, | intrc | NM_ | .        |
| ACa04 | 21 | 11119368 | rs4638882 | C | A | . | PASS | .      | inte  | NM_ | dis.     |
| ACa04 | 21 | 37510089 | .         | T | C | . | PASS | CBR3-A | ncR   | NR_ | .        |
| ACa04 | 21 | 39325007 | .         | G | A | . | PASS | .      | inte  | NM_ | dis.     |
| ACa04 | 21 | 43833080 | .         | G | A | . | PASS | UBASH  | intrc | NM_ | .        |
| ACa04 | 21 | 44485591 | .         | G | C | . | PASS | CBS    | exo   | NM_ | missens  |
| ACa04 | 21 | 46392916 | rs7276130 | G | A | . | PASS | FAM207 | intrc | NM_ | .        |
| ACa04 | 21 | 46931982 | .         | C | G | . | PASS | COL18A | intrc | NM_ | .        |
| ACa04 | 22 | 16123397 | .         | C | T | . | PASS | .      | inte  | NON | dis.     |
| ACa04 | 22 | 16350457 | .         | T | A | . | PASS | .      | inte  | NM_ | dis.     |
| ACa04 | 22 | 16402051 | .         | G | C | . | PASS | .      | inte  | NM_ | dis.     |
| ACa04 | 22 | 18769491 | rs3769174 | G | T | . | PASS | GGT3P  | ncR   | NR_ | .        |
| ACa04 | 22 | 18905842 | rs2870983 | C | T | . | PASS | PRODH  | exo   | NM_ | missens  |
| ACa04 | 22 | 20946316 | .         | G | A | . | PASS | .      | inte  | NM_ | dis.     |
| ACa04 | 22 | 21680779 | rs1389774 | C | G | . | PASS | .      | inte  | NR_ | dis.     |
| ACa04 | 22 | 25043098 | rs3731564 | G | C | . | PASS | POM12  | ncR   | NR_ | .        |
| ACa04 | 22 | 29804684 | rs1856371 | C | T | . | PASS | .      | inte  | NM_ | dis.     |
| ACa04 | 22 | 30772838 | .         | C | G | . | PASS | KIAA16 | ncR   | NR_ | .        |
| ACa04 | 22 | 30975994 | rs5669283 | G | A | . | PASS | PES1   | intrc | NM_ | .        |
| ACa04 | 22 | 35729221 | .         | G | T | . | PASS | TOM1   | intrc | NM_ | .        |
| ACa04 | 22 | 37868474 | rs7606577 | G | A | . | PASS | MFNG   | intrc | NM_ | .        |
| ACa04 | 22 | 39387762 | .         | G | C | . | PASS | APOBE  | ncR   | NR_ | .        |
| ACa04 | 22 | 39760283 | .         | G | C | . | PASS | SYNGR  | exo   | NM_ | missens  |
| ACa04 | 22 | 41278055 | rs1409901 | C | T | . | PASS | XPNPE  | exo   | NM_ | missens  |
| ACa04 | 22 | 41574519 | .         | G | C | . | PASS | EP300  | exo   | NM_ | missens  |
| ACa04 | 22 | 42263232 | rs3731131 | G | A | . | PASS | SREBF  | exo   | NM_ | synonyr  |
| ACa04 | 22 | 45754721 | .         | C | G | . | PASS | SMC1B  | intrc | NM_ | .        |
| ACa04 | 22 | 49834699 | .         | C | T | . | PASS | .      | inte  | NR_ | dis.     |
| ACa04 | 22 | 50582294 | .         | G | A | . | PASS | MOV10l | intrc | NM_ | .        |
| ACa04 | 22 | 50727449 | rs7711497 | G | A | . | PASS | PLXNB  | exo   | NM_ | synonyr  |
| ACa04 | X  | 1584248  | .         | C | T | . | PASS | P2RY8  | UTF   | NM_ | NM_      |
| ACa04 | X  | 2132123  | rs8673094 | G | A | . | PASS | .      | inte  | NM_ | dis.     |
| ACa04 | X  | 8433469  | rs7643909 | T | C | . | PASS | VCX3B  | UTF   | NM_ | NM_      |
| ACa04 | X  | 9373412  | rs6640384 | G | A | . | PASS | .      | inte  | NM_ | dis.     |

|       |   |          |           |   |   |   |      |         |            |          |
|-------|---|----------|-----------|---|---|---|------|---------|------------|----------|
| ACa04 | X | 12903684 | .         | C | G | . | PASS | TLR7    | exon NM_   | missens  |
| ACa04 | X | 12938436 | .         | C | A | . | PASS | TLR8    | exon NM_   | stopgain |
| ACa04 | X | 32834767 | .         | G | T | . | PASS | DMD     | intron NM_ | .        |
| ACa04 | X | 43591975 | .         | G | A | . | PASS | MAOA    | exon NM_   | missens  |
| ACa04 | X | 48123486 | .         | G | A | . | PASS | SSX1    | intron NM_ | .        |
| ACa04 | X | 48690443 | .         | G | A | . | PASS | PCSK1   | exon NM_   | synonym  |
| ACa04 | X | 49643021 | .         | C | G | . | PASS | USP27   | ncR NR_    | .        |
| ACa04 | X | 54099413 | .         | G | A | . | PASS | FAM12C  | UTR NM_    | NM_      |
| ACa04 | X | 54184236 | .         | A | G | . | PASS | FAM12C  | intron NM_ | .        |
| ACa04 | X | 54577415 | .         | G | A | . | PASS | GNL3L   | exon NM_   | synonym  |
| ACa04 | X | 56763695 | .         | C | T | . | PASS | UQCRB   | ncR NR_    | .        |
| ACa04 | X | 69898849 | .         | T | C | . | PASS | TEX11   | intron NM_ | .        |
| ACa04 | X | 70348196 | .         | C | G | . | PASS | MED12   | exon NM_   | stopgain |
| ACa04 | X | 70367605 | .         | G | A | . | PASS | NLGN3   | exon NM_   | stopgain |
| ACa04 | X | 70814750 | .         | C | G | . | PASS | BCYRN   | ncR NR_    | .        |
| ACa04 | X | 1.17E+08 | .         | G | A | . | PASS | .       | intron NM_ | dis.     |
| ACa04 | X | 1.29E+08 | .         | C | T | . | PASS | SASH3   | exon NM_   | stopgain |
| ACa04 | X | 1.29E+08 | .         | G | C | . | PASS | UTP14A  | exon NM_   | missens  |
| ACa04 | X | 1.29E+08 | .         | G | A | . | PASS | BCORL   | exon NM_   | missens  |
| ACa04 | X | 1.31E+08 | .         | G | A | . | PASS | FIRRE   | ncR NR_    | .        |
| ACa04 | X | 1.36E+08 | .         | C | T | . | PASS | ARHGE   | exon NM_   | missens  |
| ACa04 | X | 1.5E+08  | .         | G | A | . | PASS | HMGB3   | exon NM_   | unknown  |
| ACa04 | X | 1.53E+08 | rs7824625 | G | A | . | PASS | TREX2   | exon NM_   | missens  |
| ACa04 | X | 1.53E+08 | .         | A | C | . | PASS | BCAP31  | intron NM_ | .        |
| ACa06 | 1 | 674136   | .         | T | C | . | PASS | .       | intron NR_ | dis.     |
| ACa06 | 1 | 674146   | rs7810569 | G | A | . | PASS | .       | intron NR_ | dis.     |
| ACa06 | 1 | 1454505  | rs1149269 | C | T | . | PASS | ATAD3B  | intron NM_ | .        |
| ACa06 | 1 | 2518366  | .         | G | T | . | PASS | FAM213  | exon NM_   | synonym  |
| ACa06 | 1 | 3410162  | .         | G | A | . | PASS | MEGF6   | intron NM_ | .        |
| ACa06 | 1 | 9165837  | .         | A | C | . | PASS | GPR157  | intron NM_ | .        |
| ACa06 | 1 | 16363042 | rs2008876 | C | T | . | PASS | .       | intron NM_ | dis.     |
| ACa06 | 1 | 16890922 | rs5565927 | T | C | . | PASS | NBPF1   | intron NM_ | .        |
| ACa06 | 1 | 16904073 | rs6177234 | C | A | . | PASS | NBPF1   | intron NM_ | .        |
| ACa06 | 1 | 16957316 | rs1008195 | C | G | . | PASS | CROCC   | ncR NR_    | .        |
| ACa06 | 1 | 17044324 | rs5388409 | G | A | . | PASS | ESPNP   | ncR NR_    | .        |
| ACa06 | 1 | 17280821 | rs6669627 | G | C | . | PASS | CROCC   | exon NM_   | missens  |
| ACa06 | 1 | 18962986 | .         | A | C | . | PASS | PAX7    | intron NM_ | .        |
| ACa06 | 1 | 27994920 | rs7661411 | C | T | . | PASS | IFI6    | intron NM_ | .        |
| ACa06 | 1 | 42049019 | rs7802118 | C | T | . | PASS | HIVEP3  | exon NM_   | missens  |
| ACa06 | 1 | 46707738 | rs8664767 | C | T | . | PASS | .       | intron NM_ | dis.     |
| ACa06 | 1 | 51525497 | .         | G | C | . | PASS | .       | intron NM_ | dis.     |
| ACa06 | 1 | 1.43E+08 | rs7581372 | T | C | . | PASS | .       | intron NR_ | dis.     |
| ACa06 | 1 | 1.43E+08 | rs7697846 | A | C | . | PASS | .       | intron NR_ | dis.     |
| ACa06 | 1 | 1.43E+08 | rs2016919 | T | A | . | PASS | .       | intron NR_ | dis.     |
| ACa06 | 1 | 1.43E+08 | .         | C | A | . | PASS | .       | intron NR_ | dis.     |
| ACa06 | 1 | 1.43E+08 | rs3703375 | C | A | . | PASS | .       | intron NR_ | dis.     |
| ACa06 | 1 | 1.43E+08 | rs1996515 | T | A | . | PASS | .       | intron NR_ | dis.     |
| ACa06 | 1 | 1.43E+08 | .         | A | T | . | PASS | .       | intron NR_ | dis.     |
| ACa06 | 1 | 1.43E+08 | .         | C | G | . | PASS | .       | intron NR_ | dis.     |
| ACa06 | 1 | 1.44E+08 | .         | G | A | . | PASS | LINC017 | ncR NR_    | .        |
| ACa06 | 1 | 1.45E+08 | .         | T | A | . | PASS | NBPF9   | intron NM_ | .        |
| ACa06 | 1 | 1.45E+08 | .         | G | T | . | PASS | NBPF25  | ncR NR_    | .        |
| ACa06 | 1 | 1.48E+08 | rs8799960 | G | C | . | PASS | NBPF8   | intron NM_ | .        |
| ACa06 | 1 | 1.49E+08 | rs2003739 | G | A | . | PASS | NBPF25  | ncR NR_    | .        |

|       |   |          |           |   |   |   |      |        |                     |
|-------|---|----------|-----------|---|---|---|------|--------|---------------------|
| ACa06 | 1 | 1.49E+08 | rs3705433 | G | A | . | PASS | NBPF25 | ncR NR_ . .         |
| ACa06 | 1 | 1.58E+08 | .         | T | G | . | PASS | FCRL4  | intrc NM_ . .       |
| ACa06 | 1 | 2.23E+08 | rs1839036 | T | A | . | PASS | .      | inte  NR_ dis .     |
| ACa06 | 1 | 2.24E+08 | .         | T | C | . | PASS | .      | inte  NM_ dis .     |
| ACa06 | 1 | 2.24E+08 | .         | A | G | . | PASS | .      | inte  NM_ dis .     |
| ACa06 | 1 | 2.26E+08 | .         | A | C | . | PASS | ENAH   | intrc NM_ . .       |
| ACa06 | 1 | 2.28E+08 | rs1828179 | T | C | . | PASS | .      | inte  NM_ dis .     |
| ACa06 | 2 | 87581867 | rs4096246 | A | C | . | PASS | .      | inte  NR_ dis .     |
| ACa06 | 2 | 88071329 | .         | G | C | . | PASS | RGPD1  | intrc NM_ . .       |
| ACa06 | 2 | 91692625 | .         | G | A | . | PASS | .      | inte  NON dis .     |
| ACa06 | 2 | 91894128 | .         | G | T | . | PASS | .      | inte  NR_ dis .     |
| ACa06 | 2 | 1.13E+08 | rs2011280 | G | A | . | PASS | ANAPC  | exo  NM_ . missens  |
| ACa06 | 2 | 1.14E+08 | rs8685337 | G | A | . | PASS | .      | ups  NR_ . .        |
| ACa06 | 2 | 1.14E+08 | rs2747968 | A | G | . | PASS | WASH2  | ncR NR_ . .         |
| ACa06 | 2 | 1.19E+08 | rs1029282 | G | T | . | PASS | INSIG2 | intrc NM_ . .       |
| ACa06 | 2 | 1.32E+08 | rs2001821 | A | G | . | PASS | POTEE  | intrc NM_ . .       |
| ACa06 | 2 | 1.33E+08 | rs7800646 | C | T | . | PASS | .      | inte  NM_ dis .     |
| ACa06 | 2 | 1.7E+08  | .         | T | C | . | PASS | DHRS9  | intrc NM_ . .       |
| ACa06 | 2 | 1.73E+08 | .         | A | T | . | PASS | SLC25A | intrc NM_ . .       |
| ACa06 | 2 | 1.82E+08 | rs1875561 | C | T | . | PASS | UBE2E3 | intrc NM_ . .       |
| ACa06 | 2 | 2.14E+08 | rs8671576 | C | G | . | PASS | IKZF2  | intrc NM_ . .       |
| ACa06 | 3 | 47384995 | .         | T | G | . | PASS | KLHL18 | intrc NM_ . .       |
| ACa06 | 3 | 1.48E+08 | .         | G | A | . | PASS | AGTR1  | exo  NM_ . synonymr |
| ACa06 | 3 | 1.49E+08 | .         | T | G | . | PASS | CP     | intrc NM_ . .       |
| ACa06 | 3 | 1.49E+08 | .         | T | G | . | PASS | CP     | intrc NM_ . .       |
| ACa06 | 3 | 1.95E+08 | rs3760511 | G | A | . | PASS | .      | inte  NM_ dis .     |
| ACa06 | 3 | 1.96E+08 | rs8677455 | A | G | . | PASS | LINC00 | ncR NR_ . .         |
| ACa06 | 3 | 1.97E+08 | rs1128840 | A | G | . | PASS | .      | inte  NR_ dis .     |
| ACa06 | 4 | 60459    | .         | C | T | . | PASS | ZNF595 | intrc NM_ . .       |
| ACa06 | 4 | 20568852 | rs1443656 | G | A | . | PASS | SLIT2  | intrc NM_ . .       |
| ACa06 | 5 | 16483589 | .         | G | A | . | PASS | FAM134 | intrc NM_ . .       |
| ACa06 | 5 | 34179578 | .         | C | T | . | PASS | .      | inte  NR_ dis .     |
| ACa06 | 5 | 69206624 | rs3759258 | G | T | . | PASS | .      | inte  NR_ dis .     |
| ACa06 | 5 | 85581332 | rs8790446 | T | C | . | PASS | NBPF25 | ncR NR_ . .         |
| ACa06 | 5 | 99715839 | .         | G | A | . | PASS | LOC10C | ncR NR_ . .         |
| ACa06 | 5 | 1.51E+08 | .         | A | C | . | PASS | SLC36A | intrc NM_ . .       |
| ACa06 | 5 | 1.63E+08 | .         | A | G | . | PASS | CCNG1  | intrc NM_ . .       |
| ACa06 | 5 | 1.78E+08 | .         | C | A | . | PASS | COL23A | exo  NM_ . missens  |
| ACa06 | 5 | 1.79E+08 | .         | C | A | . | PASS | ADAMT  | intrc NM_ . .       |
| ACa06 | 6 | 26020676 | rs3719775 | T | C | . | PASS | .      | ups  NM_ . .        |
| ACa06 | 6 | 26104023 | rs9202904 | C | G | . | PASS | .      | ups  NM_ . .        |
| ACa06 | 6 | 58776826 | rs4292554 | A | G | . | PASS | .      | inte  NR_ dis .     |
| ACa06 | 6 | 58779162 | rs4437505 | G | T | . | PASS | .      | inte  NR_ dis .     |
| ACa06 | 6 | 1.39E+08 | rs7508774 | C | T | . | PASS | KIAA12 | intrc NM_ . .       |
| ACa06 | 6 | 1.52E+08 | .         | A | C | . | PASS | SYNE1  | intrc NM_ . .       |
| ACa06 | 6 | 1.68E+08 | rs1436754 | G | A | . | PASS | TCP10L | intrc NM_ . .       |
| ACa06 | 6 | 1.7E+08  | .         | A | G | . | PASS | WDR27  | intrc NM_ . .       |
| ACa06 | 7 | 4153191  | .         | A | C | . | PASS | SDK1   | intrc NM_ . .       |
| ACa06 | 7 | 6005457  | rs2016650 | T | A | . | PASS | RSPH1C | intrc NM_ . .       |
| ACa06 | 7 | 36543628 | .         | T | G | . | PASS | .      | inte  NM_ dis .     |
| ACa06 | 7 | 56881190 | .         | C | G | . | PASS | .      | inte  NR_ dis .     |
| ACa06 | 7 | 56883751 | .         | C | G | . | PASS | .      | inte  NR_ dis .     |
| ACa06 | 7 | 56887007 | .         | C | G | . | PASS | .      | inte  NR_ dis .     |
| ACa06 | 7 | 56887955 | .         | C | A | . | PASS | .      | inte  NR_ dis .     |

|       |    |          |           |   |   |   |      |        |             |         |
|-------|----|----------|-----------|---|---|---|------|--------|-------------|---------|
| ACa06 | 7  | 56888086 | .         | G | T | . | PASS | .      | inte NR_dis | .       |
| ACa06 | 7  | 56888134 | .         | C | T | . | PASS | .      | inte NR_dis | .       |
| ACa06 | 7  | 56902845 | .         | A | C | . | PASS | .      | inte NR_dis | .       |
| ACa06 | 7  | 61969095 | rs4596537 | C | A | . | PASS | .      | inte NO dis | .       |
| ACa06 | 7  | 61970255 | rs2167825 | A | C | . | PASS | .      | inte NO dis | .       |
| ACa06 | 7  | 62956351 | rs586765  | G | T | . | PASS | .      | inte NR_dis | .       |
| ACa06 | 7  | 63213633 | rs8688020 | G | A | . | PASS | .      | inte NR_dis | .       |
| ACa06 | 7  | 76130717 | rs2462259 | C | T | . | PASS | DTX2   | intrc NM_   | .       |
| ACa06 | 7  | 1.02E+08 | rs6248349 | G | A | . | PASS | POLR2  | intrc NM_   | .       |
| ACa06 | 7  | 1.28E+08 | rs3741264 | C | G | . | PASS | LINC01 | (ncR NR_    | .       |
| ACa06 | 7  | 1.52E+08 | .         | T | C | . | PASS | KMT2C  | intrc NM_   | .       |
| ACa06 | 8  | 7386635  | rs2077351 | A | C | . | PASS | .      | inte NM_dis | .       |
| ACa06 | 8  | 38123857 | .         | T | G | . | PASS | PPAPD  | (intrc NM_  | .       |
| ACa06 | 8  | 43828037 | rs7503847 | T | G | . | PASS | .      | inte NM_dis | .       |
| ACa06 | 8  | 43838571 | rs7967153 | G | A | . | PASS | .      | inte NM_dis | .       |
| ACa06 | 8  | 43838646 | .         | A | G | . | PASS | .      | inte NM_dis | .       |
| ACa06 | 8  | 46844372 | rs4363208 | C | G | . | PASS | .      | inte NO dis | .       |
| ACa06 | 8  | 46849129 | rs3740584 | G | C | . | PASS | .      | inte NO dis | .       |
| ACa06 | 8  | 1.12E+08 | .         | C | T | . | PASS | .      | ncR NR_     | .       |
| ACa06 | 8  | 1.44E+08 | .         | G | A | . | PASS | ARC    | exo NM_     | missens |
| ACa06 | 8  | 1.45E+08 | rs7821104 | T | G | . | PASS | OPLAH  | intrc NM_   | .       |
| ACa06 | 9  | 46843601 | rs7495042 | G | A | . | PASS | .      | ups NR_     | .       |
| ACa06 | 9  | 68415282 | rs4928839 | A | C | . | PASS | .      | inte NM_dis | .       |
| ACa06 | 9  | 68427877 | rs4568707 | G | A | . | PASS | LOC642 | ncR NR_     | .       |
| ACa06 | 9  | 70731624 | rs1435617 | T | C | . | PASS | .      | inte NM_dis | .       |
| ACa06 | 9  | 70731789 | rs3773733 | T | C | . | PASS | .      | inte NM_dis | .       |
| ACa06 | 9  | 91150674 | .         | C | G | . | PASS | NXNL2  | intrc NM_   | .       |
| ACa06 | 9  | 1.27E+08 | .         | T | G | . | PASS | .      | inte NM_dis | .       |
| ACa06 | 9  | 1.28E+08 | .         | C | T | . | PASS | MAPKA  | intrc NM_   | .       |
| ACa06 | 10 | 23639834 | rs1397322 | T | C | . | PASS | .      | inte NM_dis | .       |
| ACa06 | 10 | 24564647 | .         | G | T | . | PASS | MIR603 | ncR NR_     | .       |
| ACa06 | 10 | 33338230 | rs9631413 | T | C | . | PASS | .      | inte NM_dis | .       |
| ACa06 | 10 | 35437448 | .         | T | C | . | PASS | CREM   | intrc NM_   | .       |
| ACa06 | 10 | 46952565 | rs694157  | A | G | . | PASS | .      | inte NR_dis | .       |
| ACa06 | 10 | 79540724 | rs5275172 | G | A | . | PASS | .      | inte NM_dis | .       |
| ACa06 | 10 | 79603188 | rs1888127 | G | A | . | PASS | DLG5   | intrc NM_   | .       |
| ACa06 | 10 | 81270971 | rs2573327 | T | C | . | PASS | .      | inte NM_dis | .       |
| ACa06 | 10 | 88988731 | rs3128226 | C | G | . | PASS | NUTM2  | intrc NM_   | .       |
| ACa06 | 11 | 49896522 | .         | T | C | . | PASS | .      | inte NR_dis | .       |
| ACa06 | 11 | 49896523 | .         | G | A | . | PASS | .      | inte NR_dis | .       |
| ACa06 | 11 | 67386723 | rs9035709 | C | T | . | PASS | .      | inte NR_dis | .       |
| ACa06 | 11 | 71373513 | rs1874489 | T | C | . | PASS | .      | inte NM_dis | .       |
| ACa06 | 11 | 76062600 | rs9666739 | G | T | . | PASS | PRKRIF | exo NM_     | missens |
| ACa06 | 11 | 76320147 | rs5688517 | G | A | . | PASS | .      | inte NM_dis | .       |
| ACa06 | 11 | 1.24E+08 | .         | G | A | . | PASS | OR8G5  | exo NM_     | missens |
| ACa06 | 11 | 1.32E+08 | .         | T | G | . | PASS | NTM    | intrc NM_   | .       |
| ACa06 | 12 | 52883962 | rs7606061 | T | C | . | PASS | KRT6A  | intrc NM_   | .       |
| ACa06 | 12 | 56481671 | .         | T | C | . | PASS | ERBB3  | exo NM_     | missens |
| ACa06 | 12 | 1.04E+08 | rs7597010 | C | T | . | PASS | TDG    | UTF NM_NM   | .       |
| ACa06 | 13 | 64320876 | rs2004528 | C | T | . | PASS | .      | inte NR_dis | .       |
| ACa06 | 13 | 1.1E+08  | rs1510074 | G | A | . | PASS | MYO16  | exo NM_     | synonym |
| ACa06 | 14 | 19890942 | rs7446578 | T | C | . | PASS | DUXAP  | ncR NR_     | .       |
| ACa06 | 14 | 19962107 | .         | C | T | . | PASS | .      | inte NR_dis | .       |
| ACa06 | 14 | 20073097 | rs2006543 | C | T | . | PASS | .      | inte NM_dis | .       |



|       |    |          |           |   |   |   |      |        |                    |
|-------|----|----------|-----------|---|---|---|------|--------|--------------------|
| ACa06 | 14 | 20073103 | rs2020426 | T | C | . | PASS | .      | inte NM_dis.       |
| ACa06 | 14 | 20158519 | rs7704695 | G | T | . | PASS | .      | inte NM_dis.       |
| ACa06 | 14 | 62014518 | .         | G | A | . | PASS | PRKCH  | exo NM_ . unknow   |
| ACa06 | 14 | 77794476 | .         | A | T | . | PASS | GSTZ1  | intrc NM_ . .      |
| ACa06 | 14 | 1.06E+08 | .         | C | T | . | PASS | .      | inte NR_dis.       |
| ACa06 | 15 | 20358726 | rs6200967 | C | T | . | PASS | .      | inte NON_dis.      |
| ACa06 | 15 | 23265062 | .         | C | T | . | PASS | .      | inte NR_dis.       |
| ACa06 | 15 | 25304994 | .         | A | C | . | PASS | .      | dow NR_ . .        |
| ACa06 | 15 | 30433484 | rs7751825 | G | C | . | PASS | GOLGA  | ncR NR_ . .        |
| ACa06 | 15 | 31048067 | rs2449652 | T | C | . | PASS | LOC10C | ncR NR_ . .        |
| ACa06 | 15 | 31048088 | rs2449653 | T | C | . | PASS | LOC10C | ncR NR_ . .        |
| ACa06 | 15 | 32685477 | .         | G | A | . | PASS | GOLGA  | intrc NM_ . .      |
| ACa06 | 15 | 32695794 | .         | G | A | . | PASS | .      | ups  NM_ . .       |
| ACa06 | 15 | 45120967 | rs6202600 | G | A | . | PASS | .      | inte NM_dis.       |
| ACa06 | 15 | 50521102 | .         | A | C | . | PASS | SLC27A | intrc NM_ . .      |
| ACa06 | 15 | 64388133 | .         | T | A | . | PASS | SNX1   | UTF NM_ NM_ .      |
| ACa06 | 15 | 84909514 | .         | C | T | . | PASS | GOLGA  | exo NM_ . missens  |
| ACa06 | 15 | 84917347 | rs3743150 | T | G | . | PASS | .      | inte NM_dis.       |
| ACa06 | 15 | 85053791 | rs9700260 | C | G | . | PASS | GOLGA  | ncR NR_ . .        |
| ACa06 | 15 | 85060248 | rs364085  | T | C | . | PASS | .      | ups  NR_ . .       |
| ACa06 | 16 | 16456691 | rs2009400 | G | A | . | PASS | .      | inte NR_dis.       |
| ACa06 | 16 | 16456731 | rs2016432 | C | T | . | PASS | .      | inte NR_dis.       |
| ACa06 | 16 | 18478257 | .         | C | T | . | PASS | .      | inte NR_dis.       |
| ACa06 | 16 | 21844945 | rs5667377 | T | C | . | PASS | .      | inte NR_dis.       |
| ACa06 | 16 | 29110458 | rs5618411 | T | C | . | PASS | RRN3P1 | ncR NR_ . .        |
| ACa06 | 16 | 29538827 | rs8792106 | A | T | . | PASS | .      | dow NR_ . .        |
| ACa06 | 16 | 46392004 | rs4319791 | C | T | . | PASS | .      | inte NON_dis.      |
| ACa06 | 16 | 46395310 | rs4349321 | G | A | . | PASS | .      | inte NON_dis.      |
| ACa06 | 16 | 46395945 | rs4246344 | G | A | . | PASS | .      | inte NON_dis.      |
| ACa06 | 16 | 46399446 | .         | A | T | . | PASS | .      | inte NON_dis.      |
| ACa06 | 16 | 46399518 | rs8799648 | A | G | . | PASS | .      | inte NON_dis.      |
| ACa06 | 16 | 46402061 | rs9972801 | A | G | . | PASS | .      | inte NON_dis.      |
| ACa06 | 16 | 46403685 | rs4324300 | G | A | . | PASS | .      | inte NON_dis.      |
| ACa06 | 16 | 46405090 | rs9328621 | T | C | . | PASS | .      | inte NON_dis.      |
| ACa06 | 16 | 46405110 | rs4380209 | C | T | . | PASS | .      | inte NON_dis.      |
| ACa06 | 16 | 46405469 | rs4291933 | A | G | . | PASS | .      | inte NON_dis.      |
| ACa06 | 16 | 46405548 | rs4011858 | G | C | . | PASS | .      | inte NON_dis.      |
| ACa06 | 16 | 46406714 | .         | G | C | . | PASS | .      | inte NON_dis.      |
| ACa06 | 16 | 46406854 | rs7205231 | T | A | . | PASS | .      | inte NON_dis.      |
| ACa06 | 16 | 46408278 | rs4093117 | C | A | . | PASS | .      | inte NON_dis.      |
| ACa06 | 16 | 46408358 | rs4249029 | G | A | . | PASS | .      | inte NON_dis.      |
| ACa06 | 16 | 46409112 | .         | C | T | . | PASS | .      | inte NON_dis.      |
| ACa06 | 16 | 90224905 | rs6205366 | G | A | . | PASS | .      | ncR NR_ . .        |
| ACa06 | 17 | 20254635 | rs2543804 | G | A | . | PASS | CCDC1  | ncR NR_ . .        |
| ACa06 | 17 | 20319816 | rs7126379 | T | C | . | PASS | .      | ups  NR_ . .       |
| ACa06 | 17 | 20319971 | rs7126379 | G | A | . | PASS | .      | ups  NR_ . .       |
| ACa06 | 17 | 21904546 | rs7841783 | G | A | . | PASS | FLJ360 | (ncR NR_ . .       |
| ACa06 | 17 | 22251757 | .         | T | A | . | PASS | .      | inte NM_dis.       |
| ACa06 | 17 | 22258648 | rs1437650 | T | G | . | PASS | .      | inte NM_dis.       |
| ACa06 | 17 | 22258694 | .         | G | A | . | PASS | .      | inte NM_dis.       |
| ACa06 | 17 | 34795273 | rs6207957 | C | T | . | PASS | .      | intrc NM_ . .      |
| ACa06 | 17 | 39432066 | rs7482024 | G | T | . | PASS | KRTAP5 | exo NM_ . synonymr |
| ACa06 | 17 | 40762339 | rs1459625 | G | A | . | PASS | TUBG1  | intrc NM_ . .      |
| ACa06 | 17 | 43663697 | .         | A | T | . | PASS | .      | inte NR_dis.       |

|       |    |          |           |   |   |   |      |         |              |
|-------|----|----------|-----------|---|---|---|------|---------|--------------|
| ACa06 | 18 | 11644538 | rs2012257 | C | G | . | PASS | .       | inte NM_dis. |
| ACa06 | 18 | 11644705 | rs3734996 | A | T | . | PASS | .       | inte NM_dis. |
| ACa06 | 18 | 61256074 | rs7520640 | G | A | . | PASS | SERPIN  | intrc NM_.   |
| ACa06 | 19 | 4902496  | .         | A | C | . | PASS | ARRDC   | intrc NM_.   |
| ACa06 | 19 | 35828631 | .         | T | A | . | PASS | CD22    | intrc NM_.   |
| ACa06 | 19 | 37780300 | rs7641371 | G | T | . | PASS | .       | inte NR_dis. |
| ACa06 | 19 | 37784701 | .         | G | A | . | PASS | .       | inte NR_dis. |
| ACa06 | 19 | 43422207 | .         | C | A | . | PASS | .       | ups NM_.     |
| ACa06 | 19 | 46118992 | .         | T | A | . | PASS | EML2    | intrc NM_.   |
| ACa06 | 19 | 53788121 | rs3499068 | A | G | . | PASS | .       | dow NR_.     |
| ACa06 | 19 | 53788159 | rs5615613 | C | T | . | PASS | .       | dow NR_.     |
| ACa06 | 19 | 54745775 | rs1334652 | G | A | . | PASS | LILRA6, | intrc NM_.   |
| ACa06 | 19 | 56755845 | rs3751555 | G | A | . | PASS | .       | inte NM_dis. |
| ACa06 | 20 | 33345744 | .         | C | T | . | PASS | NCOA6   | exo NM_.     |
| ACa06 | 21 | 9649976  | rs7984422 | A | G | . | PASS | .       | inte NO dis. |
| ACa06 | 21 | 11124384 | rs2017188 | T | C | . | PASS | .       | inte NM_dis. |
| ACa06 | 22 | 16350628 | rs3753995 | G | A | . | PASS | .       | inte NM_dis. |
| ACa06 | 22 | 16400056 | .         | A | T | . | PASS | .       | inte NM_dis. |
| ACa06 | 22 | 16401857 | rs2021509 | A | G | . | PASS | .       | inte NM_dis. |
| ACa06 | 22 | 20339179 | .         | T | G | . | PASS | DGCR6   | inte NM_dis. |
| ACa06 | 22 | 20715169 | rs6221896 | C | T | . | PASS | .       | inte NM_dis. |
| ACa06 | 22 | 21579897 | rs2016329 | G | T | . | PASS | .       | inte NR_dis. |
| ACa06 | 22 | 25045452 | rs6223125 | C | T | . | PASS | POM12   | ncR NR_.     |
| ACa06 | 22 | 29818992 | rs367416  | T | C | . | PASS | .       | inte NM_dis. |
| ACa06 | 22 | 42538399 | rs3609392 | C | T | . | PASS | CYP2D7  | ncR NR_.     |
| ACa06 | 22 | 42910604 | .         | C | A | . | PASS | RRP7A   | intrc NM_.   |
| ACa06 | 22 | 44579135 | .         | G | A | . | PASS | PARVG   | intrc NM_.   |
| ACa06 | X  | 53254115 | .         | C | T | . | PASS | KDM5C   | UTF NM_NV.   |
| ACa06 | X  | 61687463 | .         | G | C | . | PASS | .       | inte NO dis. |
| ACa06 | X  | 61712648 | .         | C | T | . | PASS | .       | inte NO dis. |
| ACa06 | X  | 61712657 | rs7520049 | T | C | . | PASS | .       | inte NO dis. |
| ACa06 | X  | 61712692 | rs7756689 | A | G | . | PASS | .       | inte NO dis. |
| ACa06 | X  | 61718950 | .         | A | C | . | PASS | .       | inte NO dis. |
| ACa06 | X  | 70280889 | rs1048883 | C | T | . | PASS | SNX12   | exo NM_.     |
| ACa06 | X  | 71091139 | .         | T | A | . | PASS | .       | inte NM_dis. |
| ACa06 | X  | 71358615 | .         | G | A | . | PASS | NHSL2   | exo NM_.     |
| ACa06 | X  | 1.39E+08 | rs1423249 | G | A | . | PASS | .       | inte NM_dis. |
| ACa06 | X  | 1.52E+08 | .         | C | T | . | PASS | .       | inte NM_dis. |
| ACa07 | 1  | 135163   | rs3744991 | C | T | . | PASS | LINC01  | ncR NR_.     |
| ACa07 | 1  | 888176   | .         | C | T | . | PASS | NOC2L   | intrc NM_.   |
| ACa07 | 1  | 897337   | rs1159856 | C | T | . | PASS | KLHL17  | exo NM_.     |
| ACa07 | 1  | 915454   | .         | G | A | . | PASS | PERM1   | exo NM_.     |
| ACa07 | 1  | 949634   | .         | C | T | . | PASS | ISG15   | exo NM_.     |
| ACa07 | 1  | 1177864  | rs5413521 | C | T | . | PASS | FAM132  | UTF NM_NV.   |
| ACa07 | 1  | 1192565  | rs7680451 | C | T | . | PASS | UBE2J2  | intrc NM_.   |
| ACa07 | 1  | 1262554  | .         | G | A | . | PASS | CPTP    | intrc NM_.   |
| ACa07 | 1  | 1290074  | .         | C | T | . | PASS | MXRA8   | exo NM_.     |
| ACa07 | 1  | 1323140  | rs7800811 | C | T | . | PASS | CCNL2   | intrc NM_.   |
| ACa07 | 1  | 1559099  | .         | G | A | . | PASS | MIB2    | intrc NM_.   |
| ACa07 | 1  | 1573264  | rs2014492 | C | T | . | PASS | CDK11E  | intrc NM_.   |
| ACa07 | 1  | 1575704  | rs7463384 | G | A | . | PASS | CDK11E  | exo NM_.     |
| ACa07 | 1  | 1580887  | .         | C | T | . | PASS | CDK11E  | intrc NM_.   |
| ACa07 | 1  | 1581607  | .         | C | T | . | PASS | CDK11E  | intrc NM_.   |
| ACa07 | 1  | 1961685  | .         | C | A | . | PASS | GABRD   | exo NM_.     |

|       |   |          |           |   |   |   |      |        |       |     |   |         |
|-------|---|----------|-----------|---|---|---|------|--------|-------|-----|---|---------|
| ACa07 | 1 | 1987788  | .         | G | A | . | PASS | PRKCZ  | intrc | NM_ | . | .       |
| ACa07 | 1 | 2341796  | .         | G | A | . | PASS | PEX10  | intrc | NM_ | . | .       |
| ACa07 | 1 | 3410459  | .         | A | G | . | PASS | MEGF6  | exo   | NM_ | . | synonyr |
| ACa07 | 1 | 3777167  | .         | C | A | . | PASS | DFFB   | intrc | NM_ | . | .       |
| ACa07 | 1 | 5947402  | .         | G | T | . | PASS | NPHP4  | exo   | NM_ | . | unknow  |
| ACa07 | 1 | 6008389  | .         | G | A | . | PASS | NPHP4  | intrc | NM_ | . | .       |
| ACa07 | 1 | 6183992  | rs9430027 | C | T | . | PASS | CHD5   | intrc | NM_ | . | .       |
| ACa07 | 1 | 6185193  | .         | C | T | . | PASS | CHD5   | exo   | NM_ | . | missens |
| ACa07 | 1 | 6190317  | .         | C | T | . | PASS | CHD5   | exo   | NM_ | . | missens |
| ACa07 | 1 | 6272914  | rs9864160 | G | A | . | PASS | RNF207 | intrc | NM_ | . | .       |
| ACa07 | 1 | 6647232  | rs7562596 | C | T | . | PASS | ZBTB48 | intrc | NM_ | . | .       |
| ACa07 | 1 | 7724209  | rs1431018 | C | T | . | PASS | CAMTA  | exo   | NM_ | . | synonyr |
| ACa07 | 1 | 7731947  | .         | T | A | . | PASS | CAMTA  | intrc | NM_ | . | .       |
| ACa07 | 1 | 7811261  | rs7748471 | C | T | . | PASS | CAMTA  | exo   | NM_ | . | synonyr |
| ACa07 | 1 | 9085255  | rs9446685 | C | T | . | PASS | SLC2A7 | intrc | NM_ | . | .       |
| ACa07 | 1 | 9165694  | rs1476580 | G | A | . | PASS | GPR157 | exo   | NM_ | . | missens |
| ACa07 | 1 | 9642260  | .         | C | T | . | PASS | SLC25A | intrc | NM_ | . | .       |
| ACa07 | 1 | 11896347 | .         | C | T | . | PASS | CLCN6  | intrc | NM_ | . | .       |
| ACa07 | 1 | 11939929 | .         | A | G | . | PASS | .      | inte  | NM_ | . | dis.    |
| ACa07 | 1 | 12018717 | rs7934532 | C | T | . | PASS | PLOD1  | intrc | NM_ | . | .       |
| ACa07 | 1 | 12123731 | .         | C | T | . | PASS | TNFRSF | intrc | NM_ | . | .       |
| ACa07 | 1 | 12372069 | .         | G | T | . | PASS | VPS13E | intrc | NM_ | . | .       |
| ACa07 | 1 | 12520438 | .         | C | T | . | PASS | VPS13E | exo   | NM_ | . | missens |
| ACa07 | 1 | 12942392 | rs2021163 | G | C | . | PASS | PRAME  | intrc | NM_ | . | .       |
| ACa07 | 1 | 13497520 | rs5876978 | C | T | . | PASS | PRAME  | intrc | NM_ | . | .       |
| ACa07 | 1 | 15844727 | rs4646008 | G | A | . | PASS | CASP9  | exo   | NM_ | . | missens |
| ACa07 | 1 | 16451683 | rs3745685 | C | T | . | PASS | EPHA2  | UTF   | NM_ | . | NM.     |
| ACa07 | 1 | 16534709 | .         | G | A | . | PASS | ARHGE  | exo   | NM_ | . | missens |
| ACa07 | 1 | 16895623 | rs3734377 | G | A | . | PASS | NBPF1  | exo   | NM_ | . | unknow  |
| ACa07 | 1 | 16904073 | rs6177234 | C | A | . | PASS | NBPF1  | intrc | NM_ | . | .       |
| ACa07 | 1 | 16916702 | rs4112521 | T | C | . | PASS | NBPF1  | intrc | NM_ | . | .       |
| ACa07 | 1 | 16918693 | rs1213433 | A | T | . | PASS | NBPF1  | UTF   | NM_ | . | NM.     |
| ACa07 | 1 | 17007589 | rs3930814 | G | A | . | PASS | .      | ups   | NR_ | . | .       |
| ACa07 | 1 | 17318448 | rs5780915 | G | A | . | PASS | ATP13A | intrc | NM_ | . | .       |
| ACa07 | 1 | 18618364 | rs3774826 | C | T | . | PASS | IGSF21 | exo   | NM_ | . | missens |
| ACa07 | 1 | 19180811 | rs3766882 | C | T | . | PASS | TAS1R2 | exo   | NM_ | . | missens |
| ACa07 | 1 | 19447882 | rs3471023 | G | A | . | PASS | UBR4   | exo   | NM_ | . | synonyr |
| ACa07 | 1 | 19465611 | .         | G | A | . | PASS | UBR4   | exo   | NM_ | . | synonyr |
| ACa07 | 1 | 19582577 | .         | A | G | . | PASS | MRT04  | intrc | NM_ | . | .       |
| ACa07 | 1 | 19665997 | rs3712996 | C | T | . | PASS | CAPZB  | UTF   | NM_ | . | NM.     |
| ACa07 | 1 | 20027202 | .         | G | A | . | PASS | TMCO4  | intrc | NM_ | . | .       |
| ACa07 | 1 | 21928363 | rs1001195 | G | A | . | PASS | RAP1G  | intrc | NM_ | . | .       |
| ACa07 | 1 | 22201078 | .         | C | T | . | PASS | HSPG2  | intrc | NM_ | . | .       |
| ACa07 | 1 | 22207859 | .         | A | G | . | PASS | HSPG2  | exo   | NM_ | . | unknow  |
| ACa07 | 1 | 22303276 | rs7584776 | C | T | . | PASS | .      | ups   | NM_ | . | .       |
| ACa07 | 1 | 22332199 | .         | C | A | . | PASS | CELA3  | exo   | NM_ | . | missens |
| ACa07 | 1 | 23285608 | .         | G | A | . | PASS | .      | intrc | NM_ | . | .       |
| ACa07 | 1 | 24122428 | .         | G | T | . | PASS | GALE   | UTF   | NM_ | . | NM.     |
| ACa07 | 1 | 24133341 | rs1391690 | C | T | . | PASS | HMGCL  | intrc | NM_ | . | .       |
| ACa07 | 1 | 25228982 | rs7518873 | G | A | . | PASS | RUNX3  | exo   | NM_ | . | synonyr |
| ACa07 | 1 | 25725774 | .         | G | T | . | PASS | RHCE   | intrc | NM_ | . | .       |
| ACa07 | 1 | 26104493 | .         | G | A | . | PASS | MAN1C  | intrc | NM_ | . | .       |
| ACa07 | 1 | 26232774 | .         | G | A | . | PASS | STMN1  | intrc | NM_ | . | .       |
| ACa07 | 1 | 26487992 | .         | C | T | . | PASS | FAM11C | exo   | NM_ | . | synonyr |

|       |   |          |           |   |   |   |      |         |        |        |          |
|-------|---|----------|-----------|---|---|---|------|---------|--------|--------|----------|
| ACa07 | 1 | 26510587 | rs7737670 | C | T | . | PASS | CNKSR   | exon   | NM_    | missens  |
| ACa07 | 1 | 26612349 | rs7767332 | C | T | . | PASS | UBXN1   | exon   | NM_    | missens  |
| ACa07 | 1 | 26881685 | .         | G | A | . | PASS | RPS6K7  | exon   | NM_    | missens  |
| ACa07 | 1 | 27106354 | rs8792552 | C | T | . | PASS | ARID1A  | exon   | NM_    | stopgain |
| ACa07 | 1 | 27158954 | .         | C | T | . | PASS | ZDHHC   | exon   | NM_    | missens  |
| ACa07 | 1 | 27432696 | rs1003250 | G | A | . | PASS | SLC9A1  | intron | NM_    | .        |
| ACa07 | 1 | 27440796 | rs7625790 | C | T | . | PASS | SLC9A1  | intron | NM_    | .        |
| ACa07 | 1 | 27629951 | rs9468364 | G | A | . | PASS | WDTC1   | intron | NM_    | .        |
| ACa07 | 1 | 27652113 | .         | C | T | . | PASS | LOC644  | ncR    | NR_    | .        |
| ACa07 | 1 | 28315229 | .         | G | A | . | PASS | EYA3    | intron | NM_    | .        |
| ACa07 | 1 | 29063869 | .         | G | C | . | PASS | YTHDF2  | intron | NM_    | .        |
| ACa07 | 1 | 31845811 | rs7596455 | G | A | . | PASS | FABP3   | exon   | NM_    | synonym  |
| ACa07 | 1 | 32280661 | rs9232513 | G | A | . | PASS | SPOCD   | exon   | NM_    | missens  |
| ACa07 | 1 | 32542285 | .         | G | A | . | PASS | TMEM3   | intron | NM_    | .        |
| ACa07 | 1 | 32751255 | .         | C | A | . | PASS | LCK     | exon   | NM_    | missens  |
| ACa07 | 1 | 32914631 | .         | G | A | . | PASS | .       | intron | NM_dis | .        |
| ACa07 | 1 | 33318809 | .         | C | T | . | PASS | S100PB  | intron | NM_    | .        |
| ACa07 | 1 | 35865003 | rs9651423 | A | G | . | PASS | ZMYM4   | intron | NM_    | .        |
| ACa07 | 1 | 38082341 | rs7723940 | G | A | . | PASS | RSPO1   | exon   | NM_    | missens  |
| ACa07 | 1 | 38155909 | .         | G | A | . | PASS | C1orf10 | intron | NM_    | .        |
| ACa07 | 1 | 38200891 | rs1814745 | C | T | . | PASS | EPHA1   | intron | NM_    | .        |
| ACa07 | 1 | 39923930 | .         | C | T | . | PASS | MACF1   | intron | NM_    | .        |
| ACa07 | 1 | 39930863 | .         | G | A | . | PASS | MACF1   | intron | NM_    | .        |
| ACa07 | 1 | 39951571 | .         | A | C | . | PASS | MACF1   | UTR    | NM_NM  | .        |
| ACa07 | 1 | 39989003 | rs5523408 | C | T | . | PASS | PPIEL   | ncR    | NR_    | .        |
| ACa07 | 1 | 40030304 | .         | G | T | . | PASS | PABPC2  | intron | NM_    | .        |
| ACa07 | 1 | 40562796 | .         | G | A | . | PASS | PPT1    | exon   | NM_    | missens  |
| ACa07 | 1 | 40705849 | .         | T | C | . | PASS | RLF     | exon   | NM_    | synonym  |
| ACa07 | 1 | 40706184 | .         | G | A | . | PASS | RLF     | UTR    | NM_NM  | .        |
| ACa07 | 1 | 41283715 | rs9093579 | G | T | . | PASS | KCNQ4   | intron | NM_    | .        |
| ACa07 | 1 | 41303941 | .         | T | A | . | PASS | KCNQ4   | intron | NM_    | .        |
| ACa07 | 1 | 42654359 | rs1179985 | C | T | . | PASS | FOXJ3   | intron | NM_    | .        |
| ACa07 | 1 | 43166550 | rs7456140 | G | A | . | PASS | YBX1    | exon   | NM_    | missens  |
| ACa07 | 1 | 43852750 | .         | G | A | . | PASS | MED8    | intron | NM_    | .        |
| ACa07 | 1 | 44166300 | .         | C | T | . | PASS | KDM4A   | ncR    | NR_    | .        |
| ACa07 | 1 | 45267625 | .         | C | T | . | PASS | PLK3    | intron | NM_    | .        |
| ACa07 | 1 | 46088738 | .         | C | A | . | PASS | CCDC1   | exon   | NM_    | missens  |
| ACa07 | 1 | 46726082 | rs7290104 | C | T | . | PASS | RAD54L  | intron | NM_    | .        |
| ACa07 | 1 | 46874979 | .         | A | G | . | PASS | FAAH    | intron | NM_    | .        |
| ACa07 | 1 | 47025920 | rs5508458 | C | T | . | PASS | MKNK1   | exon   | NM_    | synonym  |
| ACa07 | 1 | 47358142 | .         | C | T | . | PASS | CYP4Z2  | ncR    | NR_    | .        |
| ACa07 | 1 | 50307777 | .         | G | T | . | PASS | AGBL4   | intron | NM_    | .        |
| ACa07 | 1 | 51808840 | rs7570389 | C | T | . | PASS | TTC39A  | intron | NM_    | .        |
| ACa07 | 1 | 53720726 | rs9512571 | C | T | . | PASS | LRP8    | intron | NM_    | .        |
| ACa07 | 1 | 53990329 | rs7759188 | C | T | . | PASS | GLIS1   | intron | NM_    | .        |
| ACa07 | 1 | 54661138 | .         | G | A | . | PASS | CYB5R1  | exon   | NM_    | missens  |
| ACa07 | 1 | 55518417 | rs3769455 | G | A | . | PASS | PCSK9   | exon   | NM_    | missens  |
| ACa07 | 1 | 57157158 | rs7815069 | C | T | . | PASS | PRKAA2  | exon   | NM_    | missens  |
| ACa07 | 1 | 58522063 | .         | C | T | . | PASS | DAB1    | intron | NM_    | .        |
| ACa07 | 1 | 65312146 | .         | T | A | . | PASS | JAK1    | intron | NM_    | .        |
| ACa07 | 1 | 67390207 | .         | C | T | . | PASS | WDR78   | intron | NM_    | .        |
| ACa07 | 1 | 74667202 | .         | C | A | . | PASS | FPGT,F  | intron | NM_    | .        |
| ACa07 | 1 | 77661094 | .         | A | G | . | PASS | PIGK    | intron | NM_    | .        |
| ACa07 | 1 | 79383715 | rs1785229 | G | A | . | PASS | ELTD1   | exon   | NM_    | synonym  |

|       |   |          |           |   |   |   |      |         |             |          |
|-------|---|----------|-----------|---|---|---|------|---------|-------------|----------|
| ACa07 | 1 | 79521735 | .         | G | A | . | PASS | .       | inte NM_dis | .        |
| ACa07 | 1 | 82431836 | rs1394863 | C | T | . | PASS | LPHN2   | exo NM_     | synonyr  |
| ACa07 | 1 | 85279635 | rs7636045 | C | T | . | PASS | LPAR3   | exo NM_     | missens  |
| ACa07 | 1 | 86119846 | .         | C | A | . | PASS | ZNHIT6  | intrc NM_   | .        |
| ACa07 | 1 | 92251861 | .         | G | T | . | PASS | TGFBR1  | intrc NM_   | .        |
| ACa07 | 1 | 94485309 | .         | G | C | . | PASS | ABCA4   | exo NM_     | synonyr  |
| ACa07 | 1 | 94520782 | rs6174943 | G | A | . | PASS | ABCA4   | exo NM_     | synonyr  |
| ACa07 | 1 | 1.01E+08 | .         | T | A | . | PASS | LRRC3   | intrc NM_   | .        |
| ACa07 | 1 | 1.03E+08 | .         | A | T | . | PASS | COL11A1 | intrc NM_   | .        |
| ACa07 | 1 | 1.09E+08 | .         | A | C | . | PASS | PRPF38  | exo NM_     | missens  |
| ACa07 | 1 | 1.1E+08  | rs9363214 | C | T | . | PASS | CELSR2  | intrc NM_   | .        |
| ACa07 | 1 | 1.11E+08 | rs7774328 | G | A | . | PASS | STRIP1  | intrc NM_   | .        |
| ACa07 | 1 | 1.11E+08 | .         | C | T | . | PASS | RBM15   | exo NM_     | missens  |
| ACa07 | 1 | 1.12E+08 | .         | T | C | . | PASS | CHIA    | UTF NM_NV   | .        |
| ACa07 | 1 | 1.12E+08 | .         | C | T | . | PASS | C1orf16 | exo NM_     | unknow   |
| ACa07 | 1 | 1.12E+08 | .         | T | C | . | PASS | FAM212  | UTF NM_NV   | .        |
| ACa07 | 1 | 1.13E+08 | rs7556469 | C | T | . | PASS | MOV10   | exo NM_     | missens  |
| ACa07 | 1 | 1.13E+08 | .         | G | A | . | PASS | RHOC    | exo NM_     | synonyr  |
| ACa07 | 1 | 1.14E+08 | .         | G | T | . | PASS | MAGI3   | exo NM_     | missens  |
| ACa07 | 1 | 1.15E+08 | .         | T | G | . | PASS | AMPD1   | intrc NM_   | .        |
| ACa07 | 1 | 1.15E+08 | rs3724512 | C | T | . | PASS | AMPD1   | exo NM_     | missens  |
| ACa07 | 1 | 1.18E+08 | .         | G | A | . | PASS | TTF2    | intrc NM_   | .        |
| ACa07 | 1 | 1.18E+08 | .         | G | T | . | PASS | SPAG17  | intrc NM_   | .        |
| ACa07 | 1 | 1.2E+08  | .         | C | T | . | PASS | NBPF7   | intrc NM_   | .        |
| ACa07 | 1 | 1.2E+08  | rs1041798 | C | T | . | PASS | NOTCH   | intrc NM_   | .        |
| ACa07 | 1 | 1.2E+08  | .         | A | G | . | PASS | NOTCH   | spl c NM_NV | .        |
| ACa07 | 1 | 1.43E+08 | .         | T | G | . | PASS | ANKRD   | ncR NR_     | .        |
| ACa07 | 1 | 1.45E+08 | rs9441133 | T | G | . | PASS | NBPF9   | exo NM_     | unknow   |
| ACa07 | 1 | 1.45E+08 | rs4067693 | G | C | . | PASS | NBPF20  | intrc NM_   | .        |
| ACa07 | 1 | 1.45E+08 | .         | A | G | . | PASS | NBPF9   | exo NM_     | unknow   |
| ACa07 | 1 | 1.45E+08 | rs7819390 | C | T | . | PASS | SEC22E  | exo NM_     | unknow   |
| ACa07 | 1 | 1.45E+08 | rs7515424 | T | A | . | PASS | NBPF28  | ncR NR_     | .        |
| ACa07 | 1 | 1.45E+08 | .         | C | T | . | PASS | NBPF28  | ncR NR_     | .        |
| ACa07 | 1 | 1.46E+08 | .         | C | T | . | PASS | POLR3C  | exo NM_     | missens  |
| ACa07 | 1 | 1.46E+08 | .         | G | A | . | PASS | NBPF28  | ncR NR_     | .        |
| ACa07 | 1 | 1.49E+08 | .         | G | A | . | PASS | LOC101  | ncR NR_     | .        |
| ACa07 | 1 | 1.49E+08 | .         | C | T | . | PASS | NBPF28  | ncR NR_     | .        |
| ACa07 | 1 | 1.5E+08  | .         | C | T | . | PASS | TARS2   | intrc NM_   | .        |
| ACa07 | 1 | 1.51E+08 | .         | G | A | . | PASS | PI4KB   | exo NM_     | stopgair |
| ACa07 | 1 | 1.51E+08 | .         | T | C | . | PASS | POGZ    | exo NM_     | missens  |
| ACa07 | 1 | 1.52E+08 | .         | G | A | . | PASS | FLG2    | exo NM_     | synonyr  |
| ACa07 | 1 | 1.53E+08 | rs9479104 | C | T | . | PASS | PGLYR1  | intrc NM_   | .        |
| ACa07 | 1 | 1.54E+08 | .         | C | T | . | PASS | S100A1  | intrc NM_   | .        |
| ACa07 | 1 | 1.54E+08 | .         | A | G | . | PASS | INTS3   | intrc NM_   | .        |
| ACa07 | 1 | 1.54E+08 | rs7704251 | G | A | . | PASS | DENND   | exo NM_     | missens  |
| ACa07 | 1 | 1.55E+08 | .         | C | A | . | PASS | UBE2Q   | spl c NM_NV | .        |
| ACa07 | 1 | 1.55E+08 | .         | C | T | . | PASS | MTX1    | intrc NM_   | .        |
| ACa07 | 1 | 1.55E+08 | .         | C | A | . | PASS | ASH1L   | exo NM_     | missens  |
| ACa07 | 1 | 1.56E+08 | .         | C | A | . | PASS | YY1AP1  | intrc NM_   | .        |
| ACa07 | 1 | 1.56E+08 | rs9321901 | C | T | . | PASS | PMF1    | UTF NM_NV   | .        |
| ACa07 | 1 | 1.57E+08 | .         | T | C | . | PASS | ARHGE   | intrc NM_   | .        |
| ACa07 | 1 | 1.57E+08 | rs3718046 | C | T | . | PASS | ETV3L   | exo NM_     | missens  |
| ACa07 | 1 | 1.58E+08 | rs2000983 | A | G | . | PASS | .       | inte NM_dis | .        |
| ACa07 | 1 | 1.58E+08 | rs7734794 | G | A | . | PASS | CD1B    | exo NM_     | synonyr  |

|       |   |          |           |   |   |   |      |         |       |        |          |
|-------|---|----------|-----------|---|---|---|------|---------|-------|--------|----------|
| ACa07 | 1 | 1.6E+08  | rs7622475 | C | T | . | PASS | CRP     | intrc | NM_    | .        |
| ACa07 | 1 | 1.61E+08 | .         | G | A | . | PASS | ADAMT   | exo   | NM_    | missens  |
| ACa07 | 1 | 1.62E+08 | rs2010794 | C | T | . | PASS | C1orf22 | exo   | NM_    | synonyr  |
| ACa07 | 1 | 1.63E+08 | .         | C | A | . | PASS | RGS4    | exo   | NM_    | missens  |
| ACa07 | 1 | 1.65E+08 | .         | A | G | . | PASS | PBX1    | exo   | NM_    | missens  |
| ACa07 | 1 | 1.67E+08 | .         | C | T | . | PASS | POU2F   | exo   | NM_    | synonyr  |
| ACa07 | 1 | 1.69E+08 | .         | G | A | . | PASS | CCDC1   | intrc | NM_    | .        |
| ACa07 | 1 | 1.7E+08  | .         | A | G | . | PASS | SELP    | intrc | NM_    | .        |
| ACa07 | 1 | 1.7E+08  | .         | C | T | . | PASS | SCYL3   | intrc | NM_    | .        |
| ACa07 | 1 | 1.74E+08 | .         | G | A | . | PASS | RABGA   | intrc | NM_    | .        |
| ACa07 | 1 | 1.77E+08 | .         | T | G | . | PASS | PAPPA2  | intrc | NM_    | .        |
| ACa07 | 1 | 1.77E+08 | rs7763360 | C | T | . | PASS | ASTN1   | exo   | NM_    | synonyr  |
| ACa07 | 1 | 1.79E+08 | .         | C | A | . | PASS | ABL2    | exo   | NM_    | stopgair |
| ACa07 | 1 | 1.8E+08  | rs1014592 | C | T | . | PASS | NPHS2   | UTF   | NM_NM  | .        |
| ACa07 | 1 | 1.8E+08  | .         | C | T | . | PASS | CEP35C  | intrc | NM_    | .        |
| ACa07 | 1 | 1.82E+08 | rs7733795 | C | A | . | PASS | CACNA   | exo   | NM_    | missens  |
| ACa07 | 1 | 1.82E+08 | rs7640679 | G | A | . | PASS | ZNF648  | exo   | NM_    | missens  |
| ACa07 | 1 | 1.82E+08 | .         | G | A | . | PASS | TEDDM   | exo   | NM_    | missens  |
| ACa07 | 1 | 1.83E+08 | rs7702036 | C | T | . | PASS | NPL     | exo   | NM_    | missens  |
| ACa07 | 1 | 1.86E+08 | .         | C | A | . | PASS | TPR     | exo   | NM_    | missens  |
| ACa07 | 1 | 1.97E+08 | .         | C | T | . | PASS | CRB1    | intrc | NM_    | .        |
| ACa07 | 1 | 2.01E+08 | .         | A | G | . | PASS | CAMSA   | intrc | NM_    | .        |
| ACa07 | 1 | 2.01E+08 | rs3712350 | G | A | . | PASS | KIF21B  | exo   | NM_    | missens  |
| ACa07 | 1 | 2.01E+08 | rs3723002 | C | T | . | PASS | CACNA   | intrc | NM_    | .        |
| ACa07 | 1 | 2.02E+08 | rs3694010 | G | A | . | PASS | NAV1    | exo   | NM_    | missens  |
| ACa07 | 1 | 2.02E+08 | .         | G | T | . | PASS | TIMM17  | intrc | NM_    | .        |
| ACa07 | 1 | 2.04E+08 | rs1044866 | C | T | . | PASS | ETNK2   | intrc | NM_    | .        |
| ACa07 | 1 | 2.05E+08 | .         | C | T | . | PASS | CNTN2   | intrc | NM_    | .        |
| ACa07 | 1 | 2.07E+08 | .         | T | G | . | PASS | C4BPA   | exo   | NM_    | synonyr  |
| ACa07 | 1 | 2.08E+08 | .         | G | A | . | PASS | CR1L    | intrc | NM_    | .        |
| ACa07 | 1 | 2.08E+08 | .         | T | C | . | PASS | PLXNA2  | intrc | NM_    | .        |
| ACa07 | 1 | 2.1E+08  | .         | C | G | . | PASS | HSD11E  | intrc | NM_    | .        |
| ACa07 | 1 | 2.11E+08 | .         | T | C | . | PASS | RCOR3   | intrc | NM_    | .        |
| ACa07 | 1 | 2.13E+08 | rs9188348 | C | T | . | PASS | TATDN   | intrc | NM_    | .        |
| ACa07 | 1 | 2.13E+08 | .         | C | T | . | PASS | FLVCR1  | exo   | NM_    | missens  |
| ACa07 | 1 | 2.13E+08 | .         | G | T | . | PASS | RPS6K   | exo   | NM_    | missens  |
| ACa07 | 1 | 2.15E+08 | .         | A | G | . | PASS | PTPN14  | intrc | NM_    | .        |
| ACa07 | 1 | 2.15E+08 | .         | G | A | . | PASS | PTPN14  | intrc | NM_    | .        |
| ACa07 | 1 | 2.16E+08 | rs9106912 | T | C | . | PASS | USH2A   | exo   | NM_    | missens  |
| ACa07 | 1 | 2.16E+08 | .         | G | T | . | PASS | USH2A   | intrc | NM_    | .        |
| ACa07 | 1 | 2.16E+08 | rs7564262 | C | T | . | PASS | USH2A   | exo   | NM_    | missens  |
| ACa07 | 1 | 2.17E+08 | rs1909372 | C | T | . | PASS | ESRRG   | UTF   | NM_NM  | .        |
| ACa07 | 1 | 2.2E+08  | .         | C | T | . | PASS | SLC30A  | splie | NM_NM  | .        |
| ACa07 | 1 | 2.2E+08  | .         | C | T | . | PASS | IARS2   | exo   | NM_    | synonyr  |
| ACa07 | 1 | 2.2E+08  | rs7799500 | C | T | . | PASS | IARS2   | exo   | NM_    | missens  |
| ACa07 | 1 | 2.21E+08 | .         | C | A | . | PASS | 2-Mar   | exo   | NM_    | missens  |
| ACa07 | 1 | 2.23E+08 | .         | T | G | . | PASS | DISP1   | exo   | NM_    | missens  |
| ACa07 | 1 | 2.24E+08 | .         | C | T | . | PASS | NVL     | intrc | NM_    | .        |
| ACa07 | 1 | 2.26E+08 | .         | G | A | . | PASS | TMEM6   | intrc | NM_    | .        |
| ACa07 | 1 | 2.26E+08 | .         | G | A | . | PASS | LEFTY2  | exo   | NM_    | missens  |
| ACa07 | 1 | 2.27E+08 | rs9303868 | C | T | . | PASS | .       | inte  | NM_dis | .        |
| ACa07 | 1 | 2.27E+08 | .         | G | A | . | PASS | ADCK3   | intrc | NM_    | .        |
| ACa07 | 1 | 2.29E+08 | .         | A | T | . | PASS | OBSCN   | exo   | NM_    | missens  |
| ACa07 | 1 | 2.31E+08 | .         | G | A | . | PASS | TRIM67  | exo   | NM_    | missens  |

|       |   |          |           |   |   |   |      |         |       |        |   |         |
|-------|---|----------|-----------|---|---|---|------|---------|-------|--------|---|---------|
| ACa07 | 1 | 2.33E+08 | .         | C | T | . | PASS | KIAA181 | intrc | NM_    | . | .       |
| ACa07 | 1 | 2.34E+08 | rs1006991 | C | T | . | PASS | KCNK1   | exo   | NM_    | . | synonyr |
| ACa07 | 1 | 2.38E+08 | rs3676265 | C | T | . | PASS | RYR2    | intrc | NM_    | . | .       |
| ACa07 | 1 | 2.43E+08 | .         | C | T | . | PASS | PLD5    | intrc | NM_    | . | .       |
| ACa07 | 1 | 2.44E+08 | .         | C | T | . | PASS | AKT3    | splic | NM_NM  | . | .       |
| ACa07 | 1 | 2.47E+08 | rs1000082 | G | A | . | PASS | .       | inte  | NM_dis | . | .       |
| ACa07 | 1 | 2.47E+08 | rs1825931 | C | T | . | PASS | ZNF496  | intrc | NM_    | . | .       |
| ACa07 | 1 | 2.49E+08 | rs7580154 | C | T | . | PASS | ZNF692  | exo   | NM_    | . | missens |
| ACa07 | 2 | 1426925  | rs3724090 | G | A | . | PASS | TPO     | intrc | NM_    | . | .       |
| ACa07 | 2 | 3212531  | rs7778730 | G | A | . | PASS | TSSC1   | intrc | NM_    | . | .       |
| ACa07 | 2 | 3391996  | .         | A | G | . | PASS | TRAPP   | exo   | NM_    | . | missens |
| ACa07 | 2 | 3428371  | rs5690508 | G | A | . | PASS | TRAPP   | exo   | NM_    | . | missens |
| ACa07 | 2 | 7594616  | .         | T | C | . | PASS | .       | inte  | NR_dis | . | .       |
| ACa07 | 2 | 9002811  | rs7490370 | G | A | . | PASS | MBOAT   | exo   | NM_    | . | missens |
| ACa07 | 2 | 9630641  | rs3691590 | C | T | . | PASS | ADAM1   | exo   | NM_    | . | missens |
| ACa07 | 2 | 11311984 | rs9653906 | G | A | . | PASS | PQLC3   | intrc | NM_    | . | .       |
| ACa07 | 2 | 16736197 | .         | C | T | . | PASS | FAM497  | intrc | NM_    | . | .       |
| ACa07 | 2 | 16740691 | rs3765736 | C | T | . | PASS | FAM497  | intrc | NM_    | . | .       |
| ACa07 | 2 | 17830745 | rs3680831 | C | T | . | PASS | VSNL1   | exo   | NM_    | . | synonyr |
| ACa07 | 2 | 18112529 | rs7556987 | C | T | . | PASS | KCNS3   | exo   | NM_    | . | missens |
| ACa07 | 2 | 23916391 | .         | G | A | . | PASS | KLHL29  | exo   | NM_    | . | missens |
| ACa07 | 2 | 24432146 | rs5650507 | G | A | . | PASS | ITSN2   | intrc | NM_    | . | .       |
| ACa07 | 2 | 24980875 | rs7736455 | G | A | . | PASS | NCOA1   | exo   | NM_    | . | synonyr |
| ACa07 | 2 | 27305031 | rs1479767 | G | A | . | PASS | EMILIN  | exo   | NM_    | . | missens |
| ACa07 | 2 | 27456909 | .         | G | A | . | PASS | CAD     | exo   | NM_    | . | missens |
| ACa07 | 2 | 27462259 | .         | A | T | . | PASS | CAD     | exo   | NM_    | . | missens |
| ACa07 | 2 | 27716532 | .         | G | A | . | PASS | FNDC4   | intrc | NM_    | . | .       |
| ACa07 | 2 | 30142703 | .         | G | A | . | PASS | ALK     | intrc | NM_    | . | .       |
| ACa07 | 2 | 32750576 | rs7664313 | G | A | . | PASS | BIRC6   | exo   | NM_    | . | missens |
| ACa07 | 2 | 32929615 | rs1047800 | G | A | . | PASS | TTC27   | intrc | NM_    | . | .       |
| ACa07 | 2 | 33127368 | .         | A | G | . | PASS | LINC00  | ncR   | NR_    | . | .       |
| ACa07 | 2 | 37085088 | .         | C | T | . | PASS | STRN    | exo   | NM_    | . | missens |
| ACa07 | 2 | 40655592 | rs7725290 | C | T | . | PASS | SLC8A1  | intrc | NM_    | . | .       |
| ACa07 | 2 | 44204020 | .         | T | G | . | PASS | LRPPR   | intrc | NM_    | . | .       |
| ACa07 | 2 | 48741989 | .         | T | C | . | PASS | PPP1R2  | UTF   | NM_NM  | . | .       |
| ACa07 | 2 | 49003359 | .         | C | A | . | PASS | STON1   | intrc | NM_    | . | .       |
| ACa07 | 2 | 54875965 | .         | C | T | . | PASS | SPTBN   | intrc | NM_    | . | .       |
| ACa07 | 2 | 54876819 | .         | C | A | . | PASS | SPTBN   | exo   | NM_    | . | missens |
| ACa07 | 2 | 55237295 | .         | T | C | . | PASS | RTN4    | UTF   | NM_NM  | . | .       |
| ACa07 | 2 | 56103922 | rs7787019 | T | C | . | PASS | EFEMP   | intrc | NM_    | . | .       |
| ACa07 | 2 | 56420574 | rs7608139 | C | T | . | PASS | CCDC8   | exo   | NM_    | . | synonyr |
| ACa07 | 2 | 60679661 | .         | T | C | . | PASS | BCL11A  | UTF   | NM_NM  | . | .       |
| ACa07 | 2 | 63660799 | .         | C | T | . | PASS | WDPCF   | intrc | NM_    | . | .       |
| ACa07 | 2 | 64114789 | .         | A | T | . | PASS | UGP2    | intrc | NM_    | . | .       |
| ACa07 | 2 | 64321781 | .         | A | C | . | PASS | PEL1    | UTF   | NM_NM  | . | .       |
| ACa07 | 2 | 69040538 | .         | C | T | . | PASS | ARHGA   | exo   | NM_    | . | missens |
| ACa07 | 2 | 69420334 | .         | A | G | . | PASS | ANTXR   | intrc | NM_    | . | .       |
| ACa07 | 2 | 70905828 | .         | C | A | . | PASS | ADD2    | intrc | NM_    | . | .       |
| ACa07 | 2 | 71304538 | .         | C | T | . | PASS | NAGK    | intrc | NM_    | . | .       |
| ACa07 | 2 | 71795020 | .         | C | A | . | PASS | DYSF    | intrc | NM_    | . | .       |
| ACa07 | 2 | 75745201 | rs7670256 | C | T | . | PASS | EVA1A   | exo   | NM_    | . | synonyr |
| ACa07 | 2 | 84811352 | .         | A | G | . | PASS | DNAH6   | exo   | NM_    | . | missens |
| ACa07 | 2 | 85262073 | rs1883943 | G | A | . | PASS | KCMF1   | intrc | NM_    | . | .       |
| ACa07 | 2 | 85578699 | .         | G | A | . | PASS | RETSA   | intrc | NM_    | . | .       |

|       |   |          |           |   |   |   |      |         |             |         |
|-------|---|----------|-----------|---|---|---|------|---------|-------------|---------|
| ACa07 | 2 | 85781324 | .         | G | T | . | PASS | GGCX    | exo NM_     | synonyr |
| ACa07 | 2 | 85819135 | .         | T | C | . | PASS | VAMP5   | intrc NM_   | .       |
| ACa07 | 2 | 87169353 | .         | C | T | . | PASS | RGPD2   | intrc NM_   | .       |
| ACa07 | 2 | 87357125 | .         | A | C | . | PASS | .       | inte NR_dis | .       |
| ACa07 | 2 | 87373787 | rs1915368 | G | A | . | PASS | .       | inte NR_dis | .       |
| ACa07 | 2 | 87580866 | rs7778874 | G | A | . | PASS | .       | inte NR_dis | .       |
| ACa07 | 2 | 87580910 | rs2923588 | G | A | . | PASS | .       | inte NR_dis | .       |
| ACa07 | 2 | 89292023 | rs3763447 | C | T | . | PASS | .       | inte NR_dis | .       |
| ACa07 | 2 | 89399384 | .         | T | G | . | PASS | .       | inte NR_dis | .       |
| ACa07 | 2 | 90048195 | .         | T | C | . | PASS | .       | inte NR_dis | .       |
| ACa07 | 2 | 91744332 | rs8689209 | G | A | . | PASS | .       | inte NO dis | .       |
| ACa07 | 2 | 91746820 | rs3759446 | C | A | . | PASS | .       | inte NO dis | .       |
| ACa07 | 2 | 91812093 | rs1210521 | G | A | . | PASS | .       | inte NO dis | .       |
| ACa07 | 2 | 95482920 | rs2931782 | G | A | . | PASS | ANKRD   | ncR NR_     | .       |
| ACa07 | 2 | 96148540 | .         | A | G | . | PASS | TRIM43  | intrc NM_   | .       |
| ACa07 | 2 | 96798403 | rs7784367 | C | T | . | PASS | ASTL    | exo NM_     | synonyr |
| ACa07 | 2 | 96964625 | .         | C | T | . | PASS | SNRNP   | exo NM_     | synonyr |
| ACa07 | 2 | 97311987 | rs5704884 | G | A | . | PASS | FER1L5  | intrc NM_   | .       |
| ACa07 | 2 | 97494583 | .         | T | C | . | PASS | CNNM3   | intrc NM_   | .       |
| ACa07 | 2 | 97784149 | rs5571075 | G | A | . | PASS | ANKRD   | exo NM_     | synonyr |
| ACa07 | 2 | 98128563 | .         | T | C | . | PASS | ANKRD   | intrc NM_   | .       |
| ACa07 | 2 | 98373844 | .         | C | A | . | PASS | TMEM1   | exo NM_     | synonyr |
| ACa07 | 2 | 1E+08    | rs7682782 | C | T | . | PASS | AFF3    | exo NM_     | missens |
| ACa07 | 2 | 1.03E+08 | .         | G | A | . | PASS | IL18R1  | exo NM_     | missens |
| ACa07 | 2 | 1.06E+08 | rs7516119 | G | A | . | PASS | TGFBR1  | exo NM_     | synonyr |
| ACa07 | 2 | 1.07E+08 | rs2018112 | C | T | . | PASS | RGPD3   | exo NM_     | missens |
| ACa07 | 2 | 1.11E+08 | rs7589510 | C | T | . | PASS | BUB1    | exo NM_     | missens |
| ACa07 | 2 | 1.13E+08 | .         | G | A | . | PASS | .       | inte NM_dis | .       |
| ACa07 | 2 | 1.14E+08 | .         | A | G | . | PASS | .       | dow NM_     | .       |
| ACa07 | 2 | 1.14E+08 | .         | A | G | . | PASS | IL36A   | exo NM_     | missens |
| ACa07 | 2 | 1.14E+08 | .         | G | A | . | PASS | .       | inte NM_dis | .       |
| ACa07 | 2 | 1.17E+08 | .         | T | C | . | PASS | DPP10   | intrc NM_   | .       |
| ACa07 | 2 | 1.21E+08 | rs7642264 | C | T | . | PASS | RALB    | exo NM_     | synonyr |
| ACa07 | 2 | 1.28E+08 | .         | T | A | . | PASS | PROC    | intrc NM_   | .       |
| ACa07 | 2 | 1.28E+08 | .         | G | A | . | PASS | MYO7B   | intrc NM_   | .       |
| ACa07 | 2 | 1.31E+08 | rs7817298 | C | T | . | PASS | SMPD4   | intrc NM_   | .       |
| ACa07 | 2 | 1.31E+08 | rs1340756 | G | C | . | PASS | .       | inte NM_dis | .       |
| ACa07 | 2 | 1.33E+08 | rs1820004 | C | T | . | PASS | .       | inte NM_dis | .       |
| ACa07 | 2 | 1.33E+08 | .         | A | G | . | PASS | GPR39   | intrc NM_   | .       |
| ACa07 | 2 | 1.34E+08 | .         | C | T | . | PASS | MIR785  | ncR NR_     | .       |
| ACa07 | 2 | 1.42E+08 | .         | C | A | . | PASS | LRP1B   | intrc NM_   | .       |
| ACa07 | 2 | 1.52E+08 | .         | G | A | . | PASS | NEB     | exo NM_     | missens |
| ACa07 | 2 | 1.53E+08 | .         | G | T | . | PASS | STAM2   | intrc NM_   | .       |
| ACa07 | 2 | 1.53E+08 | .         | G | A | . | PASS | FMNL2   | intrc NM_   | .       |
| ACa07 | 2 | 1.54E+08 | rs1012824 | C | T | . | PASS | PRPF4C  | intrc NM_   | .       |
| ACa07 | 2 | 1.54E+08 | rs9859742 | A | C | . | PASS | ARL6IP1 | intrc NM_   | .       |
| ACa07 | 2 | 1.6E+08  | rs2003571 | C | T | . | PASS | TANC1   | exo NM_     | missens |
| ACa07 | 2 | 1.63E+08 | rs3721419 | G | A | . | PASS | SLC4A1  | exo NM_     | missens |
| ACa07 | 2 | 1.63E+08 | .         | G | T | . | PASS | DPP4    | intrc NM_   | .       |
| ACa07 | 2 | 1.63E+08 | rs1029714 | C | T | . | PASS | DPP4    | intrc NM_   | .       |
| ACa07 | 2 | 1.66E+08 | .         | G | A | . | PASS | SCN3A   | intrc NM_   | .       |
| ACa07 | 2 | 1.7E+08  | .         | T | G | . | PASS | ABCB11  | intrc NM_   | .       |
| ACa07 | 2 | 1.7E+08  | .         | G | T | . | PASS | BBS5    | UTF NM_NM   | .       |
| ACa07 | 2 | 1.72E+08 | .         | A | G | . | PASS | LOC101  | ncR NR_     | .       |



|       |   |          |           |   |   |   |      |         |         |       |          |         |
|-------|---|----------|-----------|---|---|---|------|---------|---------|-------|----------|---------|
| ACa07 | 2 | 1.72E+08 | rs9215367 | C | T | . | PASS | GORAS   | exon    | NM_   | stopgain |         |
| ACa07 | 2 | 1.73E+08 | .         |   | T | A | .    | PASS    | DYNC11  | intrc | NM_      | .       |
| ACa07 | 2 | 1.74E+08 | rs9638533 | G | A | . | PASS | RAPGE   | intrc   | NM_   | .        |         |
| ACa07 | 2 | 1.75E+08 | .         |   | T | C | .    | PASS    | WIPF1   | intrc | NM_      | .       |
| ACa07 | 2 | 1.76E+08 | .         |   | T | C | .    | PASS    | CHRNA   | intrc | NM_      | .       |
| ACa07 | 2 | 1.76E+08 | .         |   | G | A | .    | PASS    | .       | inte  | NM_dis   | .       |
| ACa07 | 2 | 1.78E+08 | .         |   | A | T | .    | PASS    | AGPS    | intrc | NM_      | .       |
| ACa07 | 2 | 1.79E+08 | .         |   | G | A | .    | PASS    | PDE11A  | intrc | NM_      | .       |
| ACa07 | 2 | 1.8E+08  | rs9603080 | T | A | . | PASS | TTN     | intrc   | NM_   | .        |         |
| ACa07 | 2 | 1.84E+08 | rs3772721 | C | T | . | PASS | DNAJC7  | exon    | NM_   | missens  |         |
| ACa07 | 2 | 1.87E+08 | rs3766275 | T | C | . | PASS | FSIP2   | exon    | NM_   | missens  |         |
| ACa07 | 2 | 1.87E+08 | .         |   | A | G | .    | PASS    | FSIP2   | exon  | NM_      | missens |
| ACa07 | 2 | 1.88E+08 | .         |   | T | C | .    | PASS    | ITGAV   | intrc | NM_      | .       |
| ACa07 | 2 | 1.9E+08  | rs3768239 | G | A | . | PASS | COL5A2  | intrc   | NM_   | .        |         |
| ACa07 | 2 | 1.9E+08  | rs7715235 | C | T | . | PASS | WDR75   | intrc   | NM_   | .        |         |
| ACa07 | 2 | 1.92E+08 | .         |   | G | A | .    | PASS    | STAT1   | intrc | NM_      | .       |
| ACa07 | 2 | 1.93E+08 | .         |   | G | A | .    | PASS    | SDPR    | exon  | NM_      | missens |
| ACa07 | 2 | 1.97E+08 | .         |   | T | A | .    | PASS    | STK17E  | exon  | NM_      | missens |
| ACa07 | 2 | 2.01E+08 | .         |   | C | T | .    | PASS    | KCTD18  | exon  | NM_      | missens |
| ACa07 | 2 | 2.02E+08 | .         |   | T | C | .    | PASS    | CLK1    | exon  | NM_      | missens |
| ACa07 | 2 | 2.03E+08 | rs5481928 | G | A | . | PASS | KIAA207 | exon    | NM_   | synonyr  |         |
| ACa07 | 2 | 2.04E+08 | rs1901033 | T | A | . | PASS | NBEAL1  | intrc   | NM_   | .        |         |
| ACa07 | 2 | 2.04E+08 | rs7778048 | A | G | . | PASS | RAPH1   | exon    | NM_   | synonyr  |         |
| ACa07 | 2 | 2.07E+08 | rs1477917 | G | A | . | PASS | EEF1B2  | exon    | NM_   | synonyr  |         |
| ACa07 | 2 | 2.07E+08 | rs5379398 | G | A | . | PASS | ADAM2   | intrc   | NM_   | .        |         |
| ACa07 | 2 | 2.09E+08 | .         |   | G | C | .    | PASS    | CRYGD   | exon  | NM_      | missens |
| ACa07 | 2 | 2.1E+08  | .         |   | C | A | .    | PASS    | .       | inte  | NM_dis   | .       |
| ACa07 | 2 | 2.11E+08 | .         |   | G | A | .    | PASS    | UNC80   | exon  | NM_      | missens |
| ACa07 | 2 | 2.11E+08 | .         |   | C | T | .    | PASS    | UNC80   | intrc | NM_      | .       |
| ACa07 | 2 | 2.11E+08 | .         |   | A | G | .    | PASS    | UNC80   | intrc | NM_      | .       |
| ACa07 | 2 | 2.11E+08 | .         |   | T | C | .    | PASS    | CPS1    | intrc | NM_      | .       |
| ACa07 | 2 | 2.19E+08 | .         |   | G | T | .    | PASS    | TNS1    | intrc | NM_      | .       |
| ACa07 | 2 | 2.19E+08 | .         |   | A | T | .    | PASS    | .       | inte  | NM_dis   | .       |
| ACa07 | 2 | 2.19E+08 | .         |   | C | A | .    | PASS    | CATIP-1 | ncR   | NR_      | .       |
| ACa07 | 2 | 2.19E+08 | .         |   | G | T | .    | PASS    | SLC11A  | splic | NM_NM    | .       |
| ACa07 | 2 | 2.19E+08 | rs5756405 | G | A | . | PASS | VIL1    | intrc   | NM_   | .        |         |
| ACa07 | 2 | 2.2E+08  | .         |   | G | T | .    | PASS    | TTLL4   | intrc | NM_      | .       |
| ACa07 | 2 | 2.2E+08  | rs3732211 | G | A | . | PASS | CCDC10  | intrc   | NM_   | .        |         |
| ACa07 | 2 | 2.2E+08  | .         |   | G | A | .    | PASS    | DNAJB2  | exon  | NM_      | synonyr |
| ACa07 | 2 | 2.2E+08  | rs7469670 | C | T | . | PASS | DES     | intrc   | NM_   | .        |         |
| ACa07 | 2 | 2.2E+08  | rs5290584 | C | T | . | PASS | SPEG    | splic   | NM_NM | .        |         |
| ACa07 | 2 | 2.22E+08 | .         |   | T | A | .    | PASS    | EPHA4   | exon  | NM_      | missens |
| ACa07 | 2 | 2.28E+08 | .         |   | C | T | .    | PASS    | IRS1    | exon  | NM_      | synonyr |
| ACa07 | 2 | 2.28E+08 | .         |   | A | T | .    | PASS    | LOC654  | ncR   | NR_      | .       |
| ACa07 | 2 | 2.31E+08 | rs499449  | C | T | . | PASS | FBXO3f  | intrc   | NM_   | .        |         |
| ACa07 | 2 | 2.32E+08 | rs7533248 | G | A | . | PASS | NMUR1   | exon    | NM_   | missens  |         |
| ACa07 | 2 | 2.33E+08 | .         |   | C | A | .    | PASS    | DIS3L2  | splic | NM_NM    | .       |
| ACa07 | 2 | 2.33E+08 | .         |   | G | T | .    | PASS    | DIS3L2  | intrc | NM_      | .       |
| ACa07 | 2 | 2.33E+08 | .         |   | G | A | .    | PASS    | ALPPL2  | intrc | NM_      | .       |
| ACa07 | 2 | 2.34E+08 | rs2020267 | G | A | . | PASS | INPP5D  | exon    | NM_   | unknow   |         |
| ACa07 | 2 | 2.35E+08 | rs1053770 | C | T | . | PASS | MROH2   | intrc   | NM_   | .        |         |
| ACa07 | 2 | 2.35E+08 | .         |   | C | T | .    | PASS    | MROH2   | exon  | NM_      | synonyr |
| ACa07 | 2 | 2.37E+08 | .         |   | C | T | .    | PASS    | IQCA1   | intrc | NM_      | .       |
| ACa07 | 2 | 2.39E+08 | rs7483373 | C | T | . | PASS | PER2    | exon    | NM_   | missens  |         |

|       |   |          |           |   |   |   |      |         |           |          |   |
|-------|---|----------|-----------|---|---|---|------|---------|-----------|----------|---|
| ACa07 | 2 | 2.41E+08 | .         | C | T | . | PASS | LOC150  | ncR NR_   | .        | . |
| ACa07 | 2 | 2.42E+08 | rs3776284 | G | A | . | PASS | KIF1A   | exo NM_   | synonyr  |   |
| ACa07 | 2 | 2.42E+08 | rs1500761 | C | T | . | PASS | KIF1A   | intrc NM_ | .        | . |
| ACa07 | 2 | 2.42E+08 | .         | G | T | . | PASS | .       | ups  NM_  | .        | . |
| ACa07 | 2 | 2.42E+08 | .         | C | T | . | PASS | .       | inte  NR_ | dis      | . |
| ACa07 | 2 | 2.42E+08 | .         | G | A | . | PASS | SNED1   | intrc NM_ | .        | . |
| ACa07 | 3 | 439920   | rs3731564 | C | T | . | PASS | CHL1    | exo NM_   | synonyr  |   |
| ACa07 | 3 | 1363137  | rs5694312 | C | T | . | PASS | CNTN6   | intrc NM_ | .        | . |
| ACa07 | 3 | 8574667  | .         | C | T | . | PASS | LMCD1   | intrc NM_ | .        | . |
| ACa07 | 3 | 9594406  | .         | G | A | . | PASS | LHFPL4  | UTF NM_   | NM_      | . |
| ACa07 | 3 | 9895229  | rs7502023 | C | T | . | PASS | .       | inte  NM_ | dis      | . |
| ACa07 | 3 | 9972567  | .         | T | C | . | PASS | IL17RC  | intrc NM_ | .        | . |
| ACa07 | 3 | 9979307  | rs7567892 | C | T | . | PASS | CRELD1  | exo NM_   | missens  |   |
| ACa07 | 3 | 10102136 | .         | C | T | . | PASS | FANCD1  | intrc NM_ | .        | . |
| ACa07 | 3 | 10953794 | .         | C | T | . | PASS | SLC6A1  | exo NM_   | missens  |   |
| ACa07 | 3 | 11832172 | .         | G | A | . | PASS | TAMM4   | intrc NM_ | .        | . |
| ACa07 | 3 | 12510284 | .         | G | A | . | PASS | .       | inte  NM_ | dis      | . |
| ACa07 | 3 | 12572765 | rs9925095 | C | T | . | PASS | TSEN2   | intrc NM_ | .        | . |
| ACa07 | 3 | 12632551 | .         | G | T | . | PASS | RAF1    | intrc NM_ | .        | . |
| ACa07 | 3 | 12957408 | .         | C | A | . | PASS | IQSEC1  | intrc NM_ | .        | . |
| ACa07 | 3 | 15281998 | .         | T | A | . | PASS | CAPN7   | exo NM_   | missens  |   |
| ACa07 | 3 | 17209148 | .         | T | C | . | PASS | TBC1D1  | intrc NM_ | .        | . |
| ACa07 | 3 | 19556925 | .         | G | T | . | PASS | KCNH8   | intrc NM_ | .        | . |
| ACa07 | 3 | 24003631 | .         | G | A | . | PASS | NR1D2   | exo NM_   | synonyr  |   |
| ACa07 | 3 | 25654229 | .         | C | T | . | PASS | TOP2B   | intrc NM_ | .        | . |
| ACa07 | 3 | 27047435 | .         | A | G | . | PASS | .       | inte  NM_ | dis      | . |
| ACa07 | 3 | 27478853 | rs8972401 | A | G | . | PASS | SLC4A7  | intrc NM_ | .        | . |
| ACa07 | 3 | 30713346 | rs1124655 | G | A | . | PASS | TGFBR1  | exo NM_   | missens  |   |
| ACa07 | 3 | 31203246 | .         | C | T | . | PASS | .       | inte  NM_ | dis      | . |
| ACa07 | 3 | 31621381 | rs7802104 | C | T | . | PASS | STT3B   | exo NM_   | unknow   |   |
| ACa07 | 3 | 36526355 | .         | G | T | . | PASS | STAC    | intrc NM_ | .        | . |
| ACa07 | 3 | 36779885 | rs5407838 | G | A | . | PASS | DCLK3   | exo NM_   | missens  |   |
| ACa07 | 3 | 37045772 | rs5599017 | G | A | . | PASS | MLH1    | intrc NM_ | .        | . |
| ACa07 | 3 | 37340490 | .         | T | C | . | PASS | GOLGA   | exo NM_   | synonyr  |   |
| ACa07 | 3 | 38153245 | rs3732183 | G | A | . | PASS | DLEC1   | intrc NM_ | .        | . |
| ACa07 | 3 | 38540225 | .         | C | T | . | PASS | EXOGL   | intrc NM_ | .        | . |
| ACa07 | 3 | 38753883 | rs7485706 | G | A | . | PASS | SCN10A  | exo NM_   | synonyr  |   |
| ACa07 | 3 | 44621509 | .         | G | A | . | PASS | ZKSCAN1 | intrc NM_ | .        | . |
| ACa07 | 3 | 45943055 | rs7745693 | G | A | . | PASS | CCR9    | exo NM_   | missens  |   |
| ACa07 | 3 | 46786468 | .         | G | A | . | PASS | .       | ups  NM_  | .        | . |
| ACa07 | 3 | 47058834 | .         | G | A | . | PASS | SETD2   | intrc NM_ | .        | . |
| ACa07 | 3 | 48476363 | rs7512571 | C | T | . | PASS | CCDC5   | exo NM_   | missens  |   |
| ACa07 | 3 | 48613210 | rs5304720 | G | A | . | PASS | COL7A1  | intrc NM_ | .        | . |
| ACa07 | 3 | 48716575 | rs3713830 | C | T | . | PASS | NCKIP5  | exo NM_   | missens  |   |
| ACa07 | 3 | 49050939 | .         | C | T | . | PASS | WDR6    | exo NM_   | missens  |   |
| ACa07 | 3 | 49095171 | rs2001906 | C | T | . | PASS | QRICH1  | exo NM_   | synonyr  |   |
| ACa07 | 3 | 49362425 | .         | G | A | . | PASS | USP4    | exo NM_   | missens  |   |
| ACa07 | 3 | 49689519 | .         | C | T | . | PASS | BSN     | exo NM_   | stopgair |   |
| ACa07 | 3 | 49897525 | .         | G | T | . | PASS | CAMKV   | intrc NM_ | .        | . |
| ACa07 | 3 | 50416564 | rs7596904 | C | T | . | PASS | CACNA   | exo NM_   | unknow   |   |
| ACa07 | 3 | 51909508 | rs1821535 | G | A | . | PASS | IQCF5-1 | ncR NR_   | .        | . |
| ACa07 | 3 | 51993350 | .         | A | G | . | PASS | PCBP4   | intrc NM_ | .        | . |
| ACa07 | 3 | 51995196 | rs7780907 | G | A | . | PASS | PCBP4   | exo NM_   | missens  |   |
| ACa07 | 3 | 52242097 | .         | A | G | . | PASS | ALAS1   | splis NM_ | NM_      | . |

|       |   |          |           |   |   |   |      |         |       |     |     |         |
|-------|---|----------|-----------|---|---|---|------|---------|-------|-----|-----|---------|
| ACa07 | 3 | 52412482 | .         | G | A | . | PASS | DNAH1   | intrc | NM_ | .   | .       |
| ACa07 | 3 | 52415487 | .         | A | G | . | PASS | DNAH1   | intrc | NM_ | .   | .       |
| ACa07 | 3 | 52425181 | .         | C | T | . | PASS | DNAH1   | intrc | NM_ | .   | .       |
| ACa07 | 3 | 52476458 | rs9624625 | C | T | . | PASS | SEMA3f  | intrc | NM_ | .   | .       |
| ACa07 | 3 | 52675780 | .         | A | T | . | PASS | PBRM1   | intrc | NM_ | .   | .       |
| ACa07 | 3 | 52713682 | .         | T | G | . | PASS | PBRM1   | exo   | NM_ | .   | missens |
| ACa07 | 3 | 53766890 | .         | C | T | . | PASS | CACNA   | exo   | NM_ | .   | missens |
| ACa07 | 3 | 53910929 | rs2000990 | C | T | . | PASS | ACTR8   | intrc | NM_ | .   | .       |
| ACa07 | 3 | 54952366 | rs9858893 | T | C | . | PASS | CACNA   | intrc | NM_ | .   | .       |
| ACa07 | 3 | 54952367 | rs1042360 | T | C | . | PASS | CACNA   | intrc | NM_ | .   | .       |
| ACa07 | 3 | 57168155 | .         | G | A | . | PASS | IL17RD  | intrc | NM_ | .   | .       |
| ACa07 | 3 | 57269719 | .         | C | A | . | PASS | APPL1   | intrc | NM_ | .   | .       |
| ACa07 | 3 | 57613858 | .         | G | T | . | PASS | DENND   | UTF   | NM_ | NM_ | .       |
| ACa07 | 3 | 58383459 | .         | G | T | . | PASS | PXK     | intrc | NM_ | .   | .       |
| ACa07 | 3 | 64547317 | rs7458693 | C | T | . | PASS | ADAMT   | exo   | NM_ | .   | synonyr |
| ACa07 | 3 | 69168127 | .         | A | G | . | PASS | LMOD3   | exo   | NM_ | .   | missens |
| ACa07 | 3 | 69987019 | .         | C | T | . | PASS | MITF    | exo   | NM_ | .   | missens |
| ACa07 | 3 | 75478300 | rs7794528 | C | T | . | PASS | FAM86I  | ncR   | NR_ | .   | .       |
| ACa07 | 3 | 97666222 | .         | G | A | . | PASS | MINA    | exo   | NM_ | .   | missens |
| ACa07 | 3 | 1.04E+08 | .         | A | G | . | PASS | .       | inte  | NR_ | dis | .       |
| ACa07 | 3 | 1.08E+08 | .         | G | T | . | PASS | KIAA15i | intrc | NM_ | .   | .       |
| ACa07 | 3 | 1.09E+08 | .         | C | T | . | PASS | MORC1   | intrc | NM_ | .   | .       |
| ACa07 | 3 | 1.13E+08 | .         | G | T | . | PASS | CFAP44  | exo   | NM_ | .   | synonyr |
| ACa07 | 3 | 1.19E+08 | .         | A | C | . | PASS | TMEM3   | splic | NM_ | NM_ | .       |
| ACa07 | 3 | 1.19E+08 | .         | C | A | . | PASS | TMEM3   | intrc | NM_ | .   | .       |
| ACa07 | 3 | 1.21E+08 | rs3684939 | G | A | . | PASS | STXBPf  | exo   | NM_ | .   | missens |
| ACa07 | 3 | 1.23E+08 | rs1001693 | G | A | . | PASS | SEMA5l  | intrc | NM_ | .   | .       |
| ACa07 | 3 | 1.25E+08 | rs1465223 | G | A | . | PASS | .       | inte  | NM_ | dis | .       |
| ACa07 | 3 | 1.26E+08 | .         | C | A | . | PASS | UROC1   | intrc | NM_ | .   | .       |
| ACa07 | 3 | 1.27E+08 | rs5528272 | G | A | . | PASS | PLXNA1  | exo   | NM_ | .   | synonyr |
| ACa07 | 3 | 1.27E+08 | rs7511092 | G | A | . | PASS | TPRA1   | exo   | NM_ | .   | synonyr |
| ACa07 | 3 | 1.28E+08 | .         | A | G | . | PASS | .       | inte  | NR_ | dis | .       |
| ACa07 | 3 | 1.29E+08 | rs5631647 | C | T | . | PASS | LOC65c  | ncR   | NR_ | .   | .       |
| ACa07 | 3 | 1.29E+08 | .         | A | G | . | PASS | RPL32F  | ncR   | NR_ | .   | .       |
| ACa07 | 3 | 1.31E+08 | .         | G | A | . | PASS | NUDT1f  | exo   | NM_ | .   | missens |
| ACa07 | 3 | 1.32E+08 | .         | C | A | . | PASS | ACPP    | UTF   | NM_ | NM_ | .       |
| ACa07 | 3 | 1.39E+08 | .         | G | A | . | PASS | PRR23f  | exo   | NM_ | .   | missens |
| ACa07 | 3 | 1.39E+08 | .         | C | T | . | PASS | PRR23C  | exo   | NM_ | .   | synonyr |
| ACa07 | 3 | 1.4E+08  | rs1408440 | C | T | . | PASS | CLSTN2  | exo   | NM_ | .   | synonyr |
| ACa07 | 3 | 1.41E+08 | .         | G | A | . | PASS | RASA2   | exo   | NM_ | .   | synonyr |
| ACa07 | 3 | 1.42E+08 | .         | C | T | . | PASS | TFDP2   | intrc | NM_ | .   | .       |
| ACa07 | 3 | 1.42E+08 | rs7685217 | A | T | . | PASS | ATR     | intrc | NM_ | .   | .       |
| ACa07 | 3 | 1.43E+08 | rs7705095 | C | T | . | PASS | PCOLC   | exo   | NM_ | .   | missens |
| ACa07 | 3 | 1.45E+08 | .         | G | A | . | PASS | .       | inte  | NM_ | dis | .       |
| ACa07 | 3 | 1.5E+08  | .         | C | T | . | PASS | .       | inte  | NR_ | dis | .       |
| ACa07 | 3 | 1.5E+08  | rs7605662 | C | T | . | PASS | EIF2A   | exo   | NM_ | .   | synonyr |
| ACa07 | 3 | 1.58E+08 | .         | C | A | . | PASS | GFM1    | intrc | NM_ | .   | .       |
| ACa07 | 3 | 1.6E+08  | .         | G | A | . | PASS | MIR16-2 | ncR   | NR_ | .   | .       |
| ACa07 | 3 | 1.67E+08 | .         | G | A | . | PASS | .       | inte  | NM_ | dis | .       |
| ACa07 | 3 | 1.7E+08  | .         | G | C | . | PASS | .       | inte  | NM_ | dis | .       |
| ACa07 | 3 | 1.7E+08  | rs5388049 | C | T | . | PASS | SKIL    | exo   | NM_ | .   | missens |
| ACa07 | 3 | 1.77E+08 | rs9368630 | G | A | . | PASS | .       | inte  | NM_ | dis | .       |
| ACa07 | 3 | 1.79E+08 | .         | G | T | . | PASS | KCNMB   | UTF   | NM_ | NM_ | .       |
| ACa07 | 3 | 1.79E+08 | rs7652687 | C | T | . | PASS | USP13   | exo   | NM_ | .   | synonyr |

|       |   |          |           |   |   |   |      |           |          |          |
|-------|---|----------|-----------|---|---|---|------|-----------|----------|----------|
| ACa07 | 3 | 1.81E+08 | rs5714458 | C | T | . | PASS | LOC101ncR | NR_      | .        |
| ACa07 | 3 | 1.83E+08 | .         | T | G | . | PASS | MCCC1     | exo NM_  | missens  |
| ACa07 | 3 | 1.83E+08 | .         | C | T | . | PASS | KLHL6     | exo NM_  | missens  |
| ACa07 | 3 | 1.84E+08 | rs9015268 | C | T | . | PASS | HTR3D     | intrc    | NM_      |
| ACa07 | 3 | 1.84E+08 | .         | T | C | . | PASS | VWA5B     | intrc    | NM_      |
| ACa07 | 3 | 1.84E+08 | rs3748943 | G | A | . | PASS | ECE2      | exo NM_  | missens  |
| ACa07 | 3 | 1.87E+08 | .         | T | A | . | PASS | SST       | intrc    | NM_      |
| ACa07 | 3 | 1.88E+08 | rs7531929 | C | T | . | PASS | LPP       | exo NM_  | synonyr  |
| ACa07 | 3 | 1.94E+08 | rs7777314 | G | A | . | PASS | TMEM4     | intrc    | NM_      |
| ACa07 | 3 | 1.95E+08 | .         | C | T | . | PASS | .         | inte NM_ | dis      |
| ACa07 | 3 | 1.95E+08 | .         | C | T | . | PASS | .         | inte NM_ | dis      |
| ACa07 | 3 | 1.95E+08 | .         | C | T | . | PASS | MUC4      | intrc    | NM_      |
| ACa07 | 3 | 1.96E+08 | .         | C | T | . | PASS | .         | inte NM_ | dis      |
| ACa07 | 3 | 1.96E+08 | rs8866852 | G | A | . | PASS | NRROS     | intrc    | NM_      |
| ACa07 | 3 | 1.98E+08 | rs7637750 | A | G | . | PASS | .         | inte NR_ | dis      |
| ACa07 | 4 | 429436   | .         | G | T | . | PASS | ABCA1     | ncR      | NR_      |
| ACa07 | 4 | 952132   | rs7620115 | G | A | . | PASS | TMEM1     | exo NM_  | unknow   |
| ACa07 | 4 | 1215618  | .         | C | A | . | PASS | CTBP1     | intrc    | NM_      |
| ACa07 | 4 | 1646117  | rs9125004 | C | T | . | PASS | FAM53     | intrc    | NM_      |
| ACa07 | 4 | 1739773  | .         | C | T | . | PASS | TACC3     | intrc    | NM_      |
| ACa07 | 4 | 1834370  | .         | G | A | . | PASS | LETM1     | intrc    | NM_      |
| ACa07 | 4 | 1953047  | rs5508099 | G | A | . | PASS | WHSC1     | intrc    | NM_      |
| ACa07 | 4 | 2260660  | .         | T | C | . | PASS | MXD4      | intrc    | NM_      |
| ACa07 | 4 | 3478009  | .         | G | A | . | PASS | DOK7      | intrc    | NM_      |
| ACa07 | 4 | 3498489  | rs9333127 | G | A | . | PASS | .         | intrc    | NM_      |
| ACa07 | 4 | 3769294  | .         | C | T | . | PASS | ADRA2     | exo NM_  | stopgair |
| ACa07 | 4 | 6303946  | rs5603533 | C | T | . | PASS | WFS1      | exo NM_  | synonyr  |
| ACa07 | 4 | 6415457  | .         | G | A | . | PASS | PPP2R2    | intrc    | NM_      |
| ACa07 | 4 | 7663381  | .         | G | A | . | PASS | SORCS     | intrc    | NM_      |
| ACa07 | 4 | 7783107  | rs3763511 | G | A | . | PASS | AFAP1     | exo NM_  | missens  |
| ACa07 | 4 | 8099021  | rs2006520 | C | T | . | PASS | ABLIM2    | intrc    | NM_      |
| ACa07 | 4 | 8218865  | rs7521101 | C | T | . | PASS | SH3TC     | exo NM_  | synonyr  |
| ACa07 | 4 | 10447435 | rs7804064 | G | A | . | PASS | ZNF518    | exo NM_  | missens  |
| ACa07 | 4 | 13615962 | .         | C | A | . | PASS | BOD1L     | exo NM_  | missens  |
| ACa07 | 4 | 15581724 | .         | G | A | . | PASS | CC2D2     | exo NM_  | missens  |
| ACa07 | 4 | 20728844 | .         | A | T | . | PASS | PACRG     | intrc    | NM_      |
| ACa07 | 4 | 24854707 | .         | T | C | . | PASS | CCDC1     | exo NM_  | missens  |
| ACa07 | 4 | 33744074 | rs1420745 | A | G | . | PASS | .         | inte NR_ | dis      |
| ACa07 | 4 | 39739166 | rs5344165 | C | T | . | PASS | UBE2K     | intrc    | NM_      |
| ACa07 | 4 | 39771917 | .         | C | T | . | PASS | UBE2K     | intrc    | NM_      |
| ACa07 | 4 | 40022163 | .         | G | T | . | PASS | .         | inte NM_ | dis      |
| ACa07 | 4 | 40245476 | rs7759148 | G | A | . | PASS | RHOH      | exo NM_  | missens  |
| ACa07 | 4 | 40776896 | .         | A | T | . | PASS | NSUN7     | exo NM_  | missens  |
| ACa07 | 4 | 47033791 | rs2856467 | C | T | . | PASS | GABRB     | intrc    | NM_      |
| ACa07 | 4 | 49244763 | rs1451863 | C | T | . | PASS | .         | inte NM_ | dis      |
| ACa07 | 4 | 49261257 | rs5941177 | C | T | . | PASS | .         | inte NM_ | dis      |
| ACa07 | 4 | 52861933 | .         | C | T | . | PASS | LRRC6     | exo NM_  | missens  |
| ACa07 | 4 | 53578826 | .         | C | T | . | PASS | DANCR     | ncR      | NR_      |
| ACa07 | 4 | 56738008 | .         | G | C | . | PASS | EXOC1     | intrc    | NM_      |
| ACa07 | 4 | 57460905 | .         | C | A | . | PASS | THEGL     | intrc    | NM_      |
| ACa07 | 4 | 68693318 | .         | G | A | . | PASS | TMPRS     | intrc    | NM_      |
| ACa07 | 4 | 70361565 | .         | C | T | . | PASS | UGT2B     | exo NM_  | stopgair |
| ACa07 | 4 | 70803516 | .         | A | T | . | PASS | CSN1S     | splc     | NM_NM    |
| ACa07 | 4 | 72412020 | rs7619680 | C | T | . | PASS | SLC4A4    | intrc    | NM_      |

|       |   |          |           |   |   |   |      |         |          |       |            |
|-------|---|----------|-----------|---|---|---|------|---------|----------|-------|------------|
| ACa07 | 4 | 73169633 | .         | C | T | . | PASS | ADAMT   | splice   | NM_NM | .          |
| ACa07 | 4 | 74365007 | rs1194702 | T | A | . | PASS | AFM     | intronic | NM    | .          |
| ACa07 | 4 | 74477637 | .         | G | T | . | PASS | RASSF1  | intronic | NM    | .          |
| ACa07 | 4 | 76804222 | rs3691209 | C | T | . | PASS | PPEF2   | exonic   | NM    | missense   |
| ACa07 | 4 | 77290615 | .         | G | T | . | PASS | CCDC1   | exonic   | NM    | synonymous |
| ACa07 | 4 | 77651986 | rs7609961 | C | T | . | PASS | SHROCK  | exonic   | NM    | missense   |
| ACa07 | 4 | 79291009 | .         | G | T | . | PASS | FRAS1   | exonic   | NM    | stopgain   |
| ACa07 | 4 | 83931968 | .         | A | G | . | PASS | LIN54   | UTR      | NM_NM | .          |
| ACa07 | 4 | 85660018 | rs8867538 | T | C | . | PASS | WDFY3   | intronic | NM    | .          |
| ACa07 | 4 | 89671588 | .         | G | T | . | PASS | FAM137  | exonic   | NM    | missense   |
| ACa07 | 4 | 1.04E+08 | .         | C | A | . | PASS | NFKB1   | intronic | NM    | .          |
| ACa07 | 4 | 1.06E+08 | .         | G | A | . | PASS | TET2    | exonic   | NM    | missense   |
| ACa07 | 4 | 1.07E+08 | rs3719859 | C | T | . | PASS | TBCK    | exonic   | NM    | unknown    |
| ACa07 | 4 | 1.11E+08 | .         | C | T | . | PASS | ENPEP   | exonic   | NM    | synonymous |
| ACa07 | 4 | 1.13E+08 | .         | A | G | . | PASS | .       | intronic | NM    | disrupt    |
| ACa07 | 4 | 1.19E+08 | .         | A | G | . | PASS | NDST3   | intronic | NM    | .          |
| ACa07 | 4 | 1.2E+08  | .         | A | G | . | PASS | LOC729  | ncRNA    | NR    | .          |
| ACa07 | 4 | 1.2E+08  | .         | G | T | . | PASS | METTL7  | exonic   | NM    | stopgain   |
| ACa07 | 4 | 1.22E+08 | .         | C | A | . | PASS | NDNF    | exonic   | NM    | missense   |
| ACa07 | 4 | 1.26E+08 | rs7744530 | T | C | . | PASS | ANKRD   | exonic   | NM    | missense   |
| ACa07 | 4 | 1.29E+08 | .         | G | T | . | PASS | C4orf29 | exonic   | NM    | missense   |
| ACa07 | 4 | 1.29E+08 | rs7741072 | A | G | . | PASS | C4orf29 | exonic   | NM    | missense   |
| ACa07 | 4 | 1.33E+08 | .         | C | A | . | PASS | .       | intronic | NR    | disrupt    |
| ACa07 | 4 | 1.39E+08 | .         | G | A | . | PASS | .       | intronic | NR    | disrupt    |
| ACa07 | 4 | 1.42E+08 | .         | G | T | . | PASS | TBC1D9  | exonic   | NM    | synonymous |
| ACa07 | 4 | 1.42E+08 | .         | G | A | . | PASS | TBC1D9  | exonic   | NM    | synonymous |
| ACa07 | 4 | 1.43E+08 | .         | A | G | . | PASS | IL15    | exonic   | NM    | synonymous |
| ACa07 | 4 | 1.45E+08 | .         | C | A | . | PASS | GYPB    | intronic | NM    | .          |
| ACa07 | 4 | 1.54E+08 | rs8661228 | T | C | . | PASS | TRIM2   | intronic | NM    | .          |
| ACa07 | 4 | 1.66E+08 | rs4095550 | G | A | . | PASS | KLHL2   | intronic | NM    | .          |
| ACa07 | 4 | 1.73E+08 | .         | G | A | . | PASS | GALNT1  | intronic | NM    | .          |
| ACa07 | 4 | 1.84E+08 | .         | A | G | . | PASS | TENM3   | exonic   | NM    | missense   |
| ACa07 | 4 | 1.86E+08 | rs9420962 | C | T | . | PASS | CCDC1   | intronic | NM    | .          |
| ACa07 | 4 | 1.87E+08 | .         | G | A | . | PASS | SORBS   | exonic   | NM    | synonymous |
| ACa07 | 4 | 1.87E+08 | rs7781796 | G | A | . | PASS | F11-AS1 | ncRNA    | NR    | .          |
| ACa07 | 5 | 482582   | .         | A | G | . | PASS | SLC9A3  | intronic | NM    | .          |
| ACa07 | 5 | 620233   | .         | G | A | . | PASS | CEP72   | exonic   | NM    | missense   |
| ACa07 | 5 | 833995   | rs412221  | G | C | . | PASS | ZDHHC   | intronic | NM    | .          |
| ACa07 | 5 | 1089337  | rs1006578 | C | T | . | PASS | SLC12A  | intronic | NM    | .          |
| ACa07 | 5 | 1879655  | .         | C | A | . | PASS | IRX4    | exonic   | NM    | missense   |
| ACa07 | 5 | 4420496  | rs9030458 | G | A | . | PASS | .       | intronic | NM    | disrupt    |
| ACa07 | 5 | 5461158  | rs7491497 | G | A | . | PASS | ICE1    | exonic   | NM    | missense   |
| ACa07 | 5 | 6491435  | .         | G | T | . | PASS | UBE2Q1  | exonic   | NM    | missense   |
| ACa07 | 5 | 6748634  | .         | A | G | . | PASS | PAPD7   | exonic   | NM    | missense   |
| ACa07 | 5 | 11159846 | rs1497666 | G | A | . | PASS | CTNND   | exonic   | NM    | synonymous |
| ACa07 | 5 | 13820656 | rs6554817 | G | A | . | PASS | DNAH5   | intronic | NM    | .          |
| ACa07 | 5 | 14145003 | rs9140889 | G | C | . | PASS | TRIO    | intronic | NM    | .          |
| ACa07 | 5 | 14461080 | rs7661668 | G | A | . | PASS | TRIO    | intronic | NM    | .          |
| ACa07 | 5 | 32522898 | rs9251299 | G | A | . | PASS | .       | intronic | NM    | disrupt    |
| ACa07 | 5 | 33642089 | rs5697598 | G | A | . | PASS | ADAMT   | intronic | NM    | .          |
| ACa07 | 5 | 34182050 | rs8799835 | G | C | . | PASS | .       | intronic | NR    | disrupt    |
| ACa07 | 5 | 34182071 | rs9765292 | G | T | . | PASS | .       | intronic | NR    | disrupt    |
| ACa07 | 5 | 34182201 | rs9765293 | C | T | . | PASS | .       | intronic | NR    | disrupt    |
| ACa07 | 5 | 38557659 | .         | C | A | . | PASS | MIR365  | ncRNA    | NR    | .          |

|       |                        |   |   |        |                            |
|-------|------------------------|---|---|--------|----------------------------|
| ACa07 | 5 40762835 .           | T | A | . PASS | PRKAA1 UTF NM_ NM_ .       |
| ACa07 | 5 41794029 .           | A | G | . PASS | OXCT1 intrc NM_ . .        |
| ACa07 | 5 43296059 .           | G | T | . PASS | HMGCS intrc NM_ . .        |
| ACa07 | 5 49410188 .           | T | C | . PASS | . inte  NR_ dis .          |
| ACa07 | 5 49410224 rs4327635 T | T | C | . PASS | . inte  NR_ dis .          |
| ACa07 | 5 49410231 .           | A | G | . PASS | . inte  NR_ dis .          |
| ACa07 | 5 56778002 rs2005764 C | C | T | . PASS | ACTBL2 exo  NM_ . missens  |
| ACa07 | 5 59189136 .           | C | T | . PASS | PDE4D exo  NM_ . missens   |
| ACa07 | 5 62073158 rs5582099 C | C | T | . PASS | . inte  NM_ dis .          |
| ACa07 | 5 64817356 .           | C | A | . PASS | CENPK spli c NM_ NM_ .     |
| ACa07 | 5 65324199 .           | G | A | . PASS | ERBB2I intrc NM_ . .       |
| ACa07 | 5 66430158 rs5672287 G | G | A | . PASS | MAST4 intrc NM_ . .        |
| ACa07 | 5 66461072 .           | A | G | . PASS | MAST4 exo  NM_ . missens   |
| ACa07 | 5 66461884 rs2016310 C | C | T | . PASS | MAST4 exo  NM_ . missens   |
| ACa07 | 5 67592074 .           | C | T | . PASS | PIK3R1 exo  NM_ . synonymr |
| ACa07 | 5 68670689 .           | A | G | . PASS | RAD17 intrc NM_ . .        |
| ACa07 | 5 69826392 .           | C | G | . PASS | GUSBP ncR NR_ . .          |
| ACa07 | 5 71482425 .           | C | A | . PASS | MAP1B intrc NM_ . .        |
| ACa07 | 5 74948776 .           | A | G | . PASS | ANKDD intrc NM_ . .        |
| ACa07 | 5 78808788 .           | C | T | . PASS | HOMER UTF NM_ NM_ .        |
| ACa07 | 5 80626348 .           | G | A | . PASS | ACOT12 exo  NM_ . synonymr |
| ACa07 | 5 82352890 .           | G | A | . PASS | TMEM1 UTF NM_ NM_ .        |
| ACa07 | 5 82868186 rs3717547 C | C | T | . PASS | VCAN intrc NM_ . .         |
| ACa07 | 5 86811590 rs7815826 C | C | T | . PASS | . inte  NM_ dis .          |
| ACa07 | 5 89989950 .           | G | T | . PASS | GPR98 exo  NM_ . missens   |
| ACa07 | 5 93809079 .           | G | A | . PASS | KIAA082 exo  NM_ . missens |
| ACa07 | 5 94936743 rs7633968 C | C | T | . PASS | ARSK exo  NM_ . missens    |
| ACa07 | 5 99401916 .           | C | T | . PASS | . inte  NR_ dis .          |
| ACa07 | 5 1.02E+08 .           | A | C | . PASS | PAM exo  NM_ . missens     |
| ACa07 | 5 1.02E+08 rs1114874 C | C | T | . PASS | PAM intrc NM_ . .          |
| ACa07 | 5 1.1E+08 .            | G | T | . PASS | . ups  NM_ . .             |
| ACa07 | 5 1.12E+08 .           | A | G | . PASS | EPB41L exo  NM_ . synonymr |
| ACa07 | 5 1.16E+08 .           | C | T | . PASS | SEMA6 exo  NM_ . synonymr  |
| ACa07 | 5 1.19E+08 .           | G | T | . PASS | TNFAIP intrc NM_ . .       |
| ACa07 | 5 1.32E+08 rs9346631 G | G | A | . PASS | SOWAF exo  NM_ . unknow    |
| ACa07 | 5 1.32E+08 .           | A | T | . PASS | AFF4 intrc NM_ . .         |
| ACa07 | 5 1.33E+08 rs7465490 C | C | T | . PASS | FSTL4 exo  NM_ . synonymr  |
| ACa07 | 5 1.34E+08 .           | C | T | . PASS | . ups  NM_ . .             |
| ACa07 | 5 1.34E+08 rs7470418 T | T | C | . PASS | DDX46 intrc NM_ . .        |
| ACa07 | 5 1.38E+08 rs7665720 C | C | T | . PASS | CDC25C exo  NM_ . missens  |
| ACa07 | 5 1.38E+08 .           | A | G | . PASS | CDC25C exo  NM_ . missens  |
| ACa07 | 5 1.38E+08 .           | A | G | . PASS | EGR1 exo  NM_ . missens    |
| ACa07 | 5 1.38E+08 rs7721589 G | G | A | . PASS | EGR1 exo  NM_ . missens    |
| ACa07 | 5 1.4E+08 .            | T | C | . PASS | ANKHD exo  NM_ . missens   |
| ACa07 | 5 1.4E+08 .            | G | A | . PASS | PCDHA exo  NM_ . synonymr  |
| ACa07 | 5 1.4E+08 .            | C | T | . PASS | PCDHA exo  NM_ . synonymr  |
| ACa07 | 5 1.4E+08 rs7823690 G  | G | A | . PASS | PCDHA exo  NM_ . synonymr  |
| ACa07 | 5 1.41E+08 .           | G | A | . PASS | PCDHB exo  NM_ . missens   |
| ACa07 | 5 1.41E+08 .           | C | T | . PASS | PCDHB exo  NM_ . missens   |
| ACa07 | 5 1.41E+08 .           | C | T | . PASS | PCDHG exo  NM_ . synonymr  |
| ACa07 | 5 1.41E+08 rs9814581 C | C | T | . PASS | PCDHG exo  NM_ . missens   |
| ACa07 | 5 1.41E+08 rs5446331 C | C | T | . PASS | PCDHG exo  NM_ . synonymr  |
| ACa07 | 5 1.41E+08 rs3769527 C | C | T | . PASS | PCDHG exo  NM_ . synonymr  |
| ACa07 | 5 1.41E+08 rs7719463 G | G | A | . PASS | PCDHG exo  NM_ . missens   |

|       |   |          |           |   |   |   |      |         |             |         |
|-------|---|----------|-----------|---|---|---|------|---------|-------------|---------|
| ACa07 | 5 | 1.41E+08 | rs2018026 | G | A | . | PASS | KIAA014 | exo NM_     | missens |
| ACa07 | 5 | 1.47E+08 | rs1000063 | A | G | . | PASS | JAKMIP  | UTF NM_NM_  |         |
| ACa07 | 5 | 1.49E+08 | .         | T | C | . | PASS | CSNK1I  | intrc NM_   | .       |
| ACa07 | 5 | 1.49E+08 | .         | A | T | . | PASS | PDE6A   | intrc NM_   | .       |
| ACa07 | 5 | 1.5E+08  | .         | G | A | . | PASS | SYNPO   | exo NM_     | missens |
| ACa07 | 5 | 1.51E+08 | .         | C | A | . | PASS | G3BP1   | exo NM_     | missens |
| ACa07 | 5 | 1.57E+08 | rs5492040 | G | A | . | PASS | CYFIP2  | intrc NM_   | .       |
| ACa07 | 5 | 1.59E+08 | rs5611223 | C | T | . | PASS | RNF145  | exo NM_     | missens |
| ACa07 | 5 | 1.67E+08 | .         | G | A | . | PASS | TENM2   | exo NM_     | missens |
| ACa07 | 5 | 1.68E+08 | .         | C | A | . | PASS | TENM2   | exo NM_     | missens |
| ACa07 | 5 | 1.68E+08 | rs1491693 | C | T | . | PASS | WWC1    | exo NM_     | missens |
| ACa07 | 5 | 1.68E+08 | rs7577825 | C | T | . | PASS | RARS    | exo NM_     | missens |
| ACa07 | 5 | 1.68E+08 | .         | G | T | . | PASS | SLIT3   | intrc NM_   | .       |
| ACa07 | 5 | 1.72E+08 | .         | T | C | . | PASS | SH3PXI  | exo NM_     | missens |
| ACa07 | 5 | 1.72E+08 | rs1822272 | C | T | . | PASS | NEURL   | intrc NM_   | .       |
| ACa07 | 5 | 1.73E+08 | .         | C | A | . | PASS | CREBR   | intrc NM_   | .       |
| ACa07 | 5 | 1.76E+08 | .         | T | C | . | PASS | FAF2    | intrc NM_   | .       |
| ACa07 | 5 | 1.77E+08 | .         | G | A | . | PASS | FGFR4   | intrc NM_   | .       |
| ACa07 | 5 | 1.77E+08 | rs4551119 | G | A | . | PASS | FGFR4   | intrc NM_   | .       |
| ACa07 | 5 | 1.77E+08 | rs5582208 | C | T | . | PASS | FGFR4   | exo NM_     | missens |
| ACa07 | 5 | 1.77E+08 | .         | C | A | . | PASS | LOC202  | ncR NR_     | .       |
| ACa07 | 5 | 1.77E+08 | .         | C | T | . | PASS | FAM155  | intrc NM_   | .       |
| ACa07 | 5 | 1.78E+08 | .         | G | A | . | PASS | GRM6    | UTF NM_NM_  |         |
| ACa07 | 5 | 1.79E+08 | rs1025870 | G | A | . | PASS | .       | inte NM_dis | .       |
| ACa07 | 5 | 1.79E+08 | .         | G | A | . | PASS | MGAT4I  | UTF NM_NM_  |         |
| ACa07 | 5 | 1.8E+08  | .         | G | T | . | PASS | GFPT2   | intrc NM_   | .       |
| ACa07 | 6 | 4996642  | rs7651293 | G | A | . | PASS | RPP40   | exo NM_     | missens |
| ACa07 | 6 | 5001178  | rs1023580 | A | T | . | PASS | RPP40   | intrc NM_   | .       |
| ACa07 | 6 | 7269296  | rs1864505 | G | A | . | PASS | .       | inte NM_dis | .       |
| ACa07 | 6 | 7481383  | .         | A | G | . | PASS | .       | inte NM_dis | .       |
| ACa07 | 6 | 7883534  | rs2004302 | C | T | . | PASS | BLOC15  | ncR NR_     | .       |
| ACa07 | 6 | 10084993 | .         | T | A | . | PASS | .       | inte NR_dis | .       |
| ACa07 | 6 | 10557615 | rs3692600 | G | A | . | PASS | GCNT2   | intrc NM_   | .       |
| ACa07 | 6 | 12122025 | rs7468362 | G | A | . | PASS | HIVEP1  | exo NM_     | missens |
| ACa07 | 6 | 15523454 | rs7674897 | C | T | . | PASS | DTNBP   | splc NM_NM_ |         |
| ACa07 | 6 | 22147112 | .         | T | G | . | PASS | CASC15  | ncR NR_     | .       |
| ACa07 | 6 | 23854521 | .         | C | T | . | PASS | .       | inte NM_dis | .       |
| ACa07 | 6 | 25023988 | .         | G | A | . | PASS | FAM65E  | intrc NM_   | .       |
| ACa07 | 6 | 26865005 | .         | T | C | . | PASS | GUSBP   | ncR NR_     | .       |
| ACa07 | 6 | 27179321 | .         | G | A | . | PASS | .       | inte NR_dis | .       |
| ACa07 | 6 | 28058830 | .         | C | T | . | PASS | ZSCAN   | ncR NR_     | .       |
| ACa07 | 6 | 28321550 | .         | G | A | . | PASS | ZKSCAN  | intrc NM_   | .       |
| ACa07 | 6 | 28569767 | .         | T | C | . | PASS | .       | inte NM_dis | .       |
| ACa07 | 6 | 29643881 | rs7653588 | G | A | . | PASS | ZFP57   | intrc NM_   | .       |
| ACa07 | 6 | 29856132 | .         | A | G | . | PASS | HLA-H   | ncR NR_     | .       |
| ACa07 | 6 | 30530100 | rs7511377 | C | T | . | PASS | PRR3    | intrc NM_   | .       |
| ACa07 | 6 | 30679176 | .         | G | T | . | PASS | MDC1    | intrc NM_   | .       |
| ACa07 | 6 | 31429977 | .         | G | A | . | PASS | .       | ups NR_     | .       |
| ACa07 | 6 | 31487246 | .         | A | G | . | PASS | .       | inte NM_dis | .       |
| ACa07 | 6 | 31594834 | rs7792598 | C | T | . | PASS | PRRC2   | exo NM_     | synonyr |
| ACa07 | 6 | 31750447 | .         | G | A | . | PASS | VARS    | intrc NM_   | .       |
| ACa07 | 6 | 32412629 | .         | T | C | . | PASS | HLA-DR  | UTF NM_NM_  |         |
| ACa07 | 6 | 33144803 | rs1119219 | C | T | . | PASS | COL11F  | exo NM_     | missens |
| ACa07 | 6 | 33147259 | rs7759216 | C | T | . | PASS | COL11F  | exo NM_     | synonyr |

|       |                      |   |   |        |        |             |         |
|-------|----------------------|---|---|--------|--------|-------------|---------|
| ACa07 | 6 33658820 .         | G | A | . PASS | ITPR3  | exo NM_     | missens |
| ACa07 | 6 34498074 .         | G | T | . PASS | PAC3IN | exo NM_     | missens |
| ACa07 | 6 35378846 rs7740360 | C | T | . PASS | PPARD  | UTF NM_NM_  |         |
| ACa07 | 6 35387747 .         | C | T | . PASS | PPARD  | intrc NM_   | .       |
| ACa07 | 6 35392381 rs7715433 | C | T | . PASS | PPARD  | exo NM_     | synonyr |
| ACa07 | 6 35436310 .         | G | A | . PASS | RPL10A | intrc NM_   | .       |
| ACa07 | 6 35927609 .         | G | C | . PASS | SLC26A | intrc NM_   | .       |
| ACa07 | 6 36710079 rs1007644 | G | A | . PASS | CPNE5  | exo NM_     | missens |
| ACa07 | 6 39843088 .         | A | G | . PASS | DAAM2  | intrc NM_   | .       |
| ACa07 | 6 41217331 rs3751257 | C | T | . PASS | .      | dow NR_     | .       |
| ACa07 | 6 41617431 rs7778285 | G | A | . PASS | MDF1   | exo NM_     | missens |
| ACa07 | 6 41738534 .         | C | A | . PASS | FRS3   | exo NM_     | missens |
| ACa07 | 6 42153585 rs8008274 | C | A | . PASS | GUCA11 | intrc NM_   | .       |
| ACa07 | 6 42227276 rs7806884 | C | T | . PASS | TRERF  | exo NM_     | unknow  |
| ACa07 | 6 42689635 .         | G | T | . PASS | PRPH2  | exo NM_     | synonyr |
| ACa07 | 6 43100271 rs1434417 | C | T | . PASS | PTK7   | exo NM_     | synonyr |
| ACa07 | 6 43126633 .         | C | T | . PASS | PTK7   | exo NM_     | missens |
| ACa07 | 6 43325659 .         | G | T | . PASS | ZNF318 | intrc NM_   | .       |
| ACa07 | 6 43484278 .         | A | G | . PASS | YIPF3  | intrc NM_   | .       |
| ACa07 | 6 43499264 rs1496900 | G | A | . PASS | XPO5   | exo NM_     | synonyr |
| ACa07 | 6 44255388 rs1435325 | G | A | . PASS | TCTE1  | exo NM_     | missens |
| ACa07 | 6 52715113 .         | G | A | . PASS | .      | inte NM_dis | .       |
| ACa07 | 6 56323987 .         | C | A | . PASS | DST    | exo NM_     | missens |
| ACa07 | 6 63939195 .         | C | G | . PASS | .      | inte NM_dis | .       |
| ACa07 | 6 70890361 .         | A | G | . PASS | COL19A | exo NM_     | synonyr |
| ACa07 | 6 71571705 rs2021606 | A | G | . PASS | SMAP1  | UTF NM_NM_  |         |
| ACa07 | 6 74073122 .         | A | T | . PASS | KHDC31 | intrc NM_   | .       |
| ACa07 | 6 74432967 .         | C | A | . PASS | CD109  | intrc NM_   | .       |
| ACa07 | 6 79651030 rs7761622 | C | T | . PASS | PHIP   | exo NM_     | missens |
| ACa07 | 6 80878661 rs1497660 | C | T | . PASS | BCKDH  | exo NM_     | missens |
| ACa07 | 6 84629075 rs1002475 | T | C | . PASS | CYB5R2 | intrc NM_   | .       |
| ACa07 | 6 88218841 rs7619979 | G | A | . PASS | SLC35A | exo NM_     | synonyr |
| ACa07 | 6 90497830 rs1015787 | G | A | . PASS | MDN1   | intrc NM_   | .       |
| ACa07 | 6 90605889 .         | C | T | . PASS | .      | dow NM_     | .       |
| ACa07 | 6 99283939 .         | T | C | . PASS | POU3F2 | exo NM_     | missens |
| ACa07 | 6 1.07E+08 rs5581466 | A | C | . PASS | LOC100 | ncR NR_     | .       |
| ACa07 | 6 1.09E+08 .         | T | C | . PASS | NR2E1  | intrc NM_   | .       |
| ACa07 | 6 1.09E+08 .         | T | C | . PASS | SESN1  | intrc NM_   | .       |
| ACa07 | 6 1.1E+08 .          | T | C | . PASS | PPIL6  | UTF NM_NM_  |         |
| ACa07 | 6 1.1E+08 .          | G | T | . PASS | MICAL1 | intrc NM_   | .       |
| ACa07 | 6 1.12E+08 .         | G | T | . PASS | REV3L  | exo NM_     | missens |
| ACa07 | 6 1.22E+08 .         | C | T | . PASS | .      | inte NM_dis | .       |
| ACa07 | 6 1.22E+08 .         | G | A | . PASS | .      | inte NM_dis | .       |
| ACa07 | 6 1.26E+08 .         | T | C | . PASS | TRMT1  | intrc NM_   | .       |
| ACa07 | 6 1.3E+08 rs3754749  | C | T | . PASS | LAMA2  | intrc NM_   | .       |
| ACa07 | 6 1.3E+08 .          | A | C | . PASS | LAMA2  | intrc NM_   | .       |
| ACa07 | 6 1.34E+08 rs7606036 | G | A | . PASS | EYA4   | exo NM_     | missens |
| ACa07 | 6 1.35E+08 rs5279151 | G | A | . PASS | ALDH8  | intrc NM_   | .       |
| ACa07 | 6 1.37E+08 rs1006659 | T | C | . PASS | IL20RA | intrc NM_   | .       |
| ACa07 | 6 1.39E+08 .         | T | C | . PASS | KIAA12 | intrc NM_   | .       |
| ACa07 | 6 1.39E+08 .         | C | T | . PASS | KIAA12 | intrc NM_   | .       |
| ACa07 | 6 1.43E+08 rs1910958 | G | A | . PASS | GPR12  | intrc NM_   | .       |
| ACa07 | 6 1.45E+08 rs1401901 | G | A | . PASS | STX11  | exo NM_     | missens |
| ACa07 | 6 1.47E+08 .         | A | G | . PASS | ADGB   | exo NM_     | missens |



|       |   |          |           |   |   |   |      |         |       |        |          |
|-------|---|----------|-----------|---|---|---|------|---------|-------|--------|----------|
| ACa07 | 6 | 1.49E+08 | rs7737449 | C | T | . | PASS | UST     | exon  | NM_    | missens  |
| ACa07 | 6 | 1.5E+08  | rs7774557 | A | G | . | PASS | GINM1   | exon  | NM_    | missens  |
| ACa07 | 6 | 1.5E+08  | .         | T | C | . | PASS | KATNA1  | exon  | NM_    | missens  |
| ACa07 | 6 | 1.5E+08  | .         | T | C | . | PASS | RAET1E  | ncR   | NR_    | .        |
| ACa07 | 6 | 1.52E+08 | .         | C | T | . | PASS | AKAP12  | intrc | NM_    | .        |
| ACa07 | 6 | 1.52E+08 | .         | C | T | . | PASS | SYNE1   | intrc | NM_    | .        |
| ACa07 | 6 | 1.53E+08 | rs5290225 | G | A | . | PASS | SYNE1   | intrc | NM_    | .        |
| ACa07 | 6 | 1.53E+08 | .         | T | C | . | PASS | SYNE1   | intrc | NM_    | .        |
| ACa07 | 6 | 1.55E+08 | .         | T | C | . | PASS | IPCEF1  | exon  | NM_    | missens  |
| ACa07 | 6 | 1.55E+08 | .         | G | A | . | PASS | SCAF8   | exon  | NM_    | missens  |
| ACa07 | 6 | 1.58E+08 | .         | C | T | . | PASS | ARID1B  | exon  | NM_    | stopgain |
| ACa07 | 6 | 1.59E+08 | rs1015839 | G | A | . | PASS | TMEM1   | intrc | NM_    | .        |
| ACa07 | 6 | 1.6E+08  | .         | C | T | . | PASS | SOD2    | exon  | NM_    | missens  |
| ACa07 | 6 | 1.6E+08  | .         | G | A | . | PASS | .       | inte  | NM_dis | .        |
| ACa07 | 6 | 1.61E+08 | .         | C | T | . | PASS | LOC729  | ncR   | NR_    | .        |
| ACa07 | 6 | 1.61E+08 | .         | C | T | . | PASS | LPA     | intrc | NM_    | .        |
| ACa07 | 6 | 1.61E+08 | .         | C | T | . | PASS | MAP3K1  | intrc | NM_    | .        |
| ACa07 | 6 | 1.62E+08 | .         | T | C | . | PASS | PARK2   | exon  | NM_    | missens  |
| ACa07 | 6 | 1.64E+08 | rs7739962 | C | T | . | PASS | QKI     | exon  | NM_    | synonym  |
| ACa07 | 6 | 1.66E+08 | rs2008105 | G | A | . | PASS | C6orf11 | exon  | NM_    | missens  |
| ACa07 | 6 | 1.68E+08 | rs7558449 | C | T | . | PASS | TCP10   | intrc | NM_    | .        |
| ACa07 | 6 | 1.7E+08  | .         | A | G | . | PASS | WDR27   | UTF   | NM_NM  | .        |
| ACa07 | 7 | 296714   | .         | T | A | . | PASS | FAM20C  | exon  | NM_    | missens  |
| ACa07 | 7 | 1458899  | .         | C | T | . | PASS | .       | inte  | NM_dis | .        |
| ACa07 | 7 | 1482145  | .         | G | T | . | PASS | MICALL  | intrc | NM_    | .        |
| ACa07 | 7 | 1515597  | .         | C | T | . | PASS | INTS1   | exon  | NM_    | missens  |
| ACa07 | 7 | 1519120  | .         | C | T | . | PASS | INTS1   | exon  | NM_    | missens  |
| ACa07 | 7 | 1526597  | rs7786995 | G | A | . | PASS | INTS1   | exon  | NM_    | synonym  |
| ACa07 | 7 | 1589844  | .         | A | G | . | PASS | TMEM1   | intrc | NM_    | .        |
| ACa07 | 7 | 2282801  | .         | G | A | . | PASS | NUDT1   | intrc | NM_    | .        |
| ACa07 | 7 | 2472403  | rs5612232 | G | A | . | PASS | CHST12  | exon  | NM_    | synonym  |
| ACa07 | 7 | 2958116  | .         | C | T | . | PASS | CARD1   | intrc | NM_    | .        |
| ACa07 | 7 | 4009076  | rs3699321 | C | T | . | PASS | SDK1    | intrc | NM_    | .        |
| ACa07 | 7 | 4150245  | .         | C | A | . | PASS | SDK1    | intrc | NM_    | .        |
| ACa07 | 7 | 4822805  | rs5413152 | C | T | . | PASS | AP5Z1   | intrc | NM_    | .        |
| ACa07 | 7 | 5963539  | .         | C | T | . | PASS | CCZ1    | exon  | NM_    | missens  |
| ACa07 | 7 | 6205433  | .         | C | A | . | PASS | CYTH3   | exon  | NM_    | missens  |
| ACa07 | 7 | 6464401  | rs7747652 | C | A | . | PASS | DAGLB   | exon  | NM_    | missens  |
| ACa07 | 7 | 6548610  | .         | G | T | . | PASS | GRID2II | exon  | NM_    | synonym  |
| ACa07 | 7 | 6639930  | .         | C | T | . | PASS | C7orf26 | exon  | NM_    | missens  |
| ACa07 | 7 | 6693528  | .         | C | T | . | PASS | ZNF316  | exon  | NM_    | synonym  |
| ACa07 | 7 | 6845627  | rs7800175 | G | A | . | PASS | CCZ1B   | intrc | NM_    | .        |
| ACa07 | 7 | 6862125  | rs8790524 | A | G | . | PASS | CCZ1B   | intrc | NM_    | .        |
| ACa07 | 7 | 6862133  | rs3726603 | G | A | . | PASS | CCZ1B   | intrc | NM_    | .        |
| ACa07 | 7 | 7398413  | .         | T | C | . | PASS | COL28A1 | exon  | NM_    | missens  |
| ACa07 | 7 | 7612747  | .         | G | A | . | PASS | MIOS    | exon  | NM_    | missens  |
| ACa07 | 7 | 10516161 | .         | G | A | . | PASS | .       | inte  | NR_dis | .        |
| ACa07 | 7 | 11675991 | .         | C | A | . | PASS | THSD7A  | exon  | NM_    | missens  |
| ACa07 | 7 | 20762859 | .         | T | C | . | PASS | ABCB5   | intrc | NM_    | .        |
| ACa07 | 7 | 21788267 | rs3710375 | C | T | . | PASS | DNAH1   | exon  | NM_    | synonym  |
| ACa07 | 7 | 22459357 | .         | T | C | . | PASS | STEAP1  | UTF   | NM_NM  | .        |
| ACa07 | 7 | 23651273 | .         | A | T | . | PASS | CCDC1   | intrc | NM_    | .        |
| ACa07 | 7 | 27689124 | rs1427054 | C | T | . | PASS | HIBADH  | exon  | NM_    | missens  |
| ACa07 | 7 | 30475623 | .         | T | C | . | PASS | NOD1    | exon  | NM_    | missens  |

|       |                      |   |   |        |                           |
|-------|----------------------|---|---|--------|---------------------------|
| ACa07 | 7 32511099 .         | C | T | . PASS | . inte  NR_ dis .         |
| ACa07 | 7 32660665 .         | G | T | . PASS | DPY19L ncR NR_ . .        |
| ACa07 | 7 33014358 rs7507081 | C | T | . PASS | FKBP9 exo  NM_ . synonymr |
| ACa07 | 7 33644928 .         | C | T | . PASS | BBS9 UTF NM_ NM_ .        |
| ACa07 | 7 35006340 .         | G | A | . PASS | DPY19L intrc NM_ . .      |
| ACa07 | 7 35130022 rs7696767 | C | T | . PASS | DPY19L ncR NR_ . .        |
| ACa07 | 7 38289110 .         | G | A | . PASS | . inte  NM_ dis .         |
| ACa07 | 7 43484829 rs7755650 | G | A | . PASS | HECW1 exo  NM_ . synonymr |
| ACa07 | 7 43508353 .         | G | A | . PASS | HECW1 intrc NM_ . .       |
| ACa07 | 7 43918365 .         | G | A | . PASS | URGCP exo  NM_ . unknow   |
| ACa07 | 7 44178934 rs1113701 | G | A | . PASS | MYL7 intrc NM_ . .        |
| ACa07 | 7 44619296 .         | G | A | . PASS | TMED4 intrc NM_ . .       |
| ACa07 | 7 44747033 .         | G | T | . PASS | OGDH intrc NM_ . .        |
| ACa07 | 7 45701804 rs7476235 | C | T | . PASS | ADCY1 exo  NM_ . synonymr |
| ACa07 | 7 45954730 rs1024757 | G | A | . PASS | IGFBP3 intrc NM_ . .      |
| ACa07 | 7 47385996 .         | A | C | . PASS | TNS3 intrc NM_ . .        |
| ACa07 | 7 47853147 .         | T | C | . PASS | C7orf69 exo  NM_ . unknow |
| ACa07 | 7 56183779 .         | G | A | . PASS | NUPR1  exo  NM_ . missens |
| ACa07 | 7 56439590 .         | C | T | . PASS | . inte  NM_ dis .         |
| ACa07 | 7 56754394 .         | G | T | . PASS | . inte  NR_ dis .         |
| ACa07 | 7 56884079 .         | C | T | . PASS | . inte  NR_ dis .         |
| ACa07 | 7 56886881 rs3749762 | T | G | . PASS | . inte  NR_ dis .         |
| ACa07 | 7 56888099 .         | C | T | . PASS | . inte  NR_ dis .         |
| ACa07 | 7 56888183 rs8799601 | C | T | . PASS | . inte  NR_ dis .         |
| ACa07 | 7 57082082 .         | G | A | . PASS | . inte  NR_ dis .         |
| ACa07 | 7 63022876 .         | C | T | . PASS | . inte  NR_ dis .         |
| ACa07 | 7 63022930 .         | C | T | . PASS | . inte  NR_ dis .         |
| ACa07 | 7 63219077 .         | G | T | . PASS | . inte  NR_ dis .         |
| ACa07 | 7 63219280 .         | G | A | . PASS | . inte  NR_ dis .         |
| ACa07 | 7 64639495 rs6156381 | C | T | . PASS | . ncR NR_ . .             |
| ACa07 | 7 65222986 .         | G | T | . PASS | CCT6P' ncR NR_ . .        |
| ACa07 | 7 65223001 .         | G | A | . PASS | CCT6P' ncR NR_ . .        |
| ACa07 | 7 66520742 rs5480693 | T | A | . PASS | TYW1 intrc NM_ . .        |
| ACa07 | 7 71175845 rs7706902 | C | T | . PASS | WBSCR exo  NM_ . missens  |
| ACa07 | 7 72336710 rs5574064 | C | T | . PASS | SPDYE' ncR NR_ . .        |
| ACa07 | 7 72640092 .         | T | C | . PASS | NCF1B ncR NR_ . .         |
| ACa07 | 7 72742252 .         | G | A | . PASS | FKBP6 UTF NM_ NM_ .       |
| ACa07 | 7 72849745 .         | C | T | . PASS | FZD9 exo  NM_ . missens   |
| ACa07 | 7 72856782 rs7822351 | C | T | . PASS | BAZ1B exo  NM_ . missens  |
| ACa07 | 7 73151034 .         | G | T | . PASS | ABHD1' intrc NM_ . .      |
| ACa07 | 7 73634643 .         | G | A | . PASS | LAT2 intrc NM_ . .        |
| ACa07 | 7 73935595 rs7822129 | G | A | . PASS | GTF2IR exo  NM_ . missens |
| ACa07 | 7 74193774 rs3705131 | T | C | . PASS | NCF1 intrc NM_ . .        |
| ACa07 | 7 74608537 rs8799812 | T | C | . PASS | GTF2IP ncR NR_ . .        |
| ACa07 | 7 76099560 rs1493360 | T | C | . PASS | FDPSP' ncR NR_ . .        |
| ACa07 | 7 76133994 rs1403890 | T | A | . PASS | DTX2 intrc NM_ . .        |
| ACa07 | 7 81613821 .         | G | A | . PASS | CACNA intrc NM_ . .       |
| ACa07 | 7 82219933 .         | A | G | . PASS | . inte  NM_ dis .         |
| ACa07 | 7 82457265 .         | C | A | . PASS | PCLO exo  NM_ . missens   |
| ACa07 | 7 90747485 rs1413343 | G | A | . PASS | CDK14 exo  NM_ . missens  |
| ACa07 | 7 93633731 rs9879024 | G | T | . PASS | . ups  NM_ . .            |
| ACa07 | 7 94039078 rs7641741 | G | A | . PASS | COL1A2 exo  NM_ . missens |
| ACa07 | 7 94268607 .         | T | G | . PASS | SGCE intrc NM_ . .        |
| ACa07 | 7 95166840 .         | G | A | . PASS | ASB4 intrc NM_ . .        |

|       |   |          |           |   |   |   |      |         |          |        |            |
|-------|---|----------|-----------|---|---|---|------|---------|----------|--------|------------|
| ACa07 | 7 | 97820925 | .         | G | T | . | PASS | LMTK2   | splice   | NM_NM  | .          |
| ACa07 | 7 | 98551092 | rs7821462 | C | T | . | PASS | TRRAP   | intronic | NM     | .          |
| ACa07 | 7 | 98563456 | rs7752142 | C | T | . | PASS | TRRAP   | exonic   | NM     | missense   |
| ACa07 | 7 | 98877074 | .         | C | T | . | PASS | MYH16   | ncRNA    | NR     | .          |
| ACa07 | 7 | 98877268 | rs9034524 | G | A | . | PASS | MYH16   | ncRNA    | NR     | .          |
| ACa07 | 7 | 1E+08    | rs5767320 | G | A | . | PASS | PCOLCE  | exonic   | NM     | missense   |
| ACa07 | 7 | 1E+08    | .         | C | T | . | PASS | ACTL6E  | exonic   | NM     | synonymous |
| ACa07 | 7 | 1.01E+08 | rs7641678 | C | T | . | PASS | MUC12   | exonic   | NM     | stopgain   |
| ACa07 | 7 | 1.01E+08 | .         | G | A | . | PASS | MOGAT1  | intronic | NM     | .          |
| ACa07 | 7 | 1.02E+08 | .         | G | A | . | PASS | CUX1    | exonic   | NM     | missense   |
| ACa07 | 7 | 1.02E+08 | rs7590335 | C | T | . | PASS | RASA4E  | exonic   | NM     | synonymous |
| ACa07 | 7 | 1.02E+08 | rs4729845 | T | C | . | PASS | SPDYE2  | intronic | NM     | .          |
| ACa07 | 7 | 1.03E+08 | .         | C | T | . | PASS | PSMC2   | exonic   | NM     | missense   |
| ACa07 | 7 | 1.04E+08 | .         | G | A | . | PASS | ORC5    | exonic   | NM     | missense   |
| ACa07 | 7 | 1.11E+08 | .         | T | C | . | PASS | LRRN3   | exonic   | NM     | synonymous |
| ACa07 | 7 | 1.12E+08 | .         | G | A | . | PASS | IFRD1   | intronic | NM     | .          |
| ACa07 | 7 | 1.17E+08 | .         | G | A | . | PASS | ASZ1    | intronic | NM     | .          |
| ACa07 | 7 | 1.22E+08 | rs1457073 | C | T | . | PASS | AASS    | intronic | NM     | .          |
| ACa07 | 7 | 1.24E+08 | .         | G | A | . | PASS | .       | intronic | NR_dis | .          |
| ACa07 | 7 | 1.24E+08 | rs3755434 | C | T | . | PASS | GPR37   | exonic   | NM     | missense   |
| ACa07 | 7 | 1.28E+08 | .         | T | A | . | PASS | .       | intronic | NM_dis | .          |
| ACa07 | 7 | 1.28E+08 | .         | G | T | . | PASS | FLNC    | exonic   | NM     | missense   |
| ACa07 | 7 | 1.29E+08 | rs2006779 | C | T | . | PASS | SMO     | exonic   | NM     | synonymous |
| ACa07 | 7 | 1.29E+08 | .         | G | T | . | PASS | .       | upstream | NM     | .          |
| ACa07 | 7 | 1.32E+08 | rs3679590 | G | A | . | PASS | PLXNA2  | exonic   | NM     | missense   |
| ACa07 | 7 | 1.35E+08 | .         | C | A | . | PASS | .       | intronic | NM_dis | .          |
| ACa07 | 7 | 1.37E+08 | .         | G | A | . | PASS | DGKI    | intronic | NM     | .          |
| ACa07 | 7 | 1.37E+08 | .         | A | G | . | PASS | DGKI    | exonic   | NM     | missense   |
| ACa07 | 7 | 1.38E+08 | .         | C | T | . | PASS | CREB3L1 | exonic   | NM     | missense   |
| ACa07 | 7 | 1.38E+08 | rs1825415 | G | A | . | PASS | ATP6V1C | intronic | NM     | .          |
| ACa07 | 7 | 1.4E+08  | .         | T | C | . | PASS | SLC37A1 | intronic | NM     | .          |
| ACa07 | 7 | 1.41E+08 | .         | C | T | . | PASS | .       | intronic | NM_dis | .          |
| ACa07 | 7 | 1.41E+08 | .         | C | T | . | PASS | AGK     | intronic | NM     | .          |
| ACa07 | 7 | 1.42E+08 | rs7825497 | C | T | . | PASS | MGAM    | exonic   | NM     | missense   |
| ACa07 | 7 | 1.42E+08 | .         | C | T | . | PASS | .       | exonic   | NM     | unknown    |
| ACa07 | 7 | 1.42E+08 | .         | C | A | . | PASS | .       | intronic | NR_dis | .          |
| ACa07 | 7 | 1.42E+08 | .         | C | T | . | PASS | .       | intronic | NR_dis | .          |
| ACa07 | 7 | 1.42E+08 | .         | C | T | . | PASS | .       | intronic | NR_dis | .          |
| ACa07 | 7 | 1.42E+08 | rs7663697 | C | T | . | PASS | .       | intronic | NR_dis | .          |
| ACa07 | 7 | 1.43E+08 | .         | G | A | . | PASS | GSTK1   | intronic | NM     | .          |
| ACa07 | 7 | 1.43E+08 | rs3733853 | G | A | . | PASS | FAM131A | intronic | NM     | .          |
| ACa07 | 7 | 1.48E+08 | rs7598872 | C | T | . | PASS | CNTNA1  | exonic   | NM     | synonymous |
| ACa07 | 7 | 1.49E+08 | rs8019707 | C | T | . | PASS | KRBA1   | intronic | NM     | .          |
| ACa07 | 7 | 1.5E+08  | rs1447568 | G | A | . | PASS | SSPO    | exonic   | NM     | missense   |
| ACa07 | 7 | 1.5E+08  | .         | T | G | . | PASS | ZNF775  | UTR      | NM_NM  | .          |
| ACa07 | 7 | 1.51E+08 | .         | A | G | . | PASS | NOS3    | intronic | NM     | .          |
| ACa07 | 7 | 1.51E+08 | .         | C | T | . | PASS | ATG9B   | exonic   | NM     | unknown    |
| ACa07 | 7 | 1.51E+08 | .         | C | T | . | PASS | CDK5    | exonic   | NM     | missense   |
| ACa07 | 7 | 1.51E+08 | .         | C | T | . | PASS | TMUB1   | exonic   | NM     | missense   |
| ACa07 | 7 | 1.51E+08 | .         | C | T | . | PASS | PRKAG1  | intronic | NM     | .          |
| ACa07 | 7 | 1.52E+08 | .         | C | T | . | PASS | PRKAG1  | intronic | NM     | .          |
| ACa07 | 7 | 1.52E+08 | rs3761181 | C | T | . | PASS | KMT2C   | exonic   | NM     | missense   |
| ACa07 | 7 | 1.52E+08 | .         | G | C | . | PASS | ACTR3L  | intronic | NM     | .          |
| ACa07 | 7 | 1.54E+08 | rs9367654 | G | A | . | PASS | DPP6    | intronic | NM     | .          |

|       |   |          |           |   |   |   |      |           |       |     |     |          |
|-------|---|----------|-----------|---|---|---|------|-----------|-------|-----|-----|----------|
| ACa07 | 7 | 1.57E+08 | .         | G | T | . | PASS | UBE3C     | intrc | NM_ | .   | .        |
| ACa07 | 7 | 1.58E+08 | rs1056749 | G | A | . | PASS | PTPRN     | intrc | NM_ | .   | .        |
| ACa07 | 7 | 1.58E+08 | rs3696336 | T | A | . | PASS | PTPRN     | intrc | NM_ | .   | .        |
| ACa07 | 7 | 1.59E+08 | .         | C | T | . | PASS | .         | inte  | NM_ | dis | .        |
| ACa07 | 8 | 328564   | .         | C | T | . | PASS | FAM87     | ncR   | NR_ | .   | .        |
| ACa07 | 8 | 1728466  | .         | T | A | . | PASS | CLN8      | exo   | NM_ | .   | synonyr  |
| ACa07 | 8 | 6668771  | rs1995647 | G | A | . | PASS | XKR5      | exo   | NM_ | .   | missens  |
| ACa07 | 8 | 6794236  | .         | C | A | . | PASS | DEFA4     | intrc | NM_ | .   | .        |
| ACa07 | 8 | 7191342  | rs7692119 | T | C | . | PASS | USP17L    | exo   | NM_ | .   | synonyr  |
| ACa07 | 8 | 7915727  | rs2946428 | C | T | . | PASS | .         | inte  | NR_ | dis | .        |
| ACa07 | 8 | 8560334  | rs7810476 | C | T | . | PASS | CLDN2     | exo   | NM_ | .   | synonyr  |
| ACa07 | 8 | 10469012 | rs7606573 | G | A | . | PASS | RP1L1     | exo   | NM_ | .   | missens  |
| ACa07 | 8 | 10530224 | .         | G | A | . | PASS | C8orf74   | splix | NM_ | NM_ | .        |
| ACa07 | 8 | 10584255 | rs7511375 | C | T | . | PASS | SOX7      | intrc | NM_ | .   | .        |
| ACa07 | 8 | 11189479 | rs7626017 | C | T | . | PASS | SLC35C    | exo   | NM_ | .   | synonyr  |
| ACa07 | 8 | 11204044 | .         | C | T | . | PASS | TDH       | ncR   | NR_ | .   | .        |
| ACa07 | 8 | 12237303 | .         | C | T | . | PASS | FAM66     | ncR   | NR_ | .   | .        |
| ACa07 | 8 | 12293333 | rs3988723 | A | G | . | PASS | FAM86E    | intrc | NM_ | .   | .        |
| ACa07 | 8 | 12459464 | rs3713666 | A | T | . | PASS | LOC72     | ncR   | NR_ | .   | .        |
| ACa07 | 8 | 12944087 | rs1036449 | G | A | . | PASS | DLC1      | intrc | NM_ | .   | .        |
| ACa07 | 8 | 15480640 | .         | T | C | . | PASS | TUSC3     | exo   | NM_ | .   | missens  |
| ACa07 | 8 | 20231256 | rs1470216 | A | G | . | PASS | .         | inte  | NR_ | dis | .        |
| ACa07 | 8 | 20231262 | rs1394112 | G | A | . | PASS | .         | inte  | NR_ | dis | .        |
| ACa07 | 8 | 21981390 | .         | C | T | . | PASS | HR        | intrc | NM_ | .   | .        |
| ACa07 | 8 | 23049182 | .         | G | T | . | PASS | TNFRSF10F | NM_   | NM_ | .   | .        |
| ACa07 | 8 | 23152173 | .         | C | A | . | PASS | R3HCC     | intrc | NM_ | .   | .        |
| ACa07 | 8 | 23560117 | .         | G | T | . | PASS | NKX2-6    | exo   | NM_ | .   | synonyr  |
| ACa07 | 8 | 25267590 | rs7690910 | C | T | . | PASS | DOCK5     | intrc | NM_ | .   | .        |
| ACa07 | 8 | 25293068 | rs2013688 | G | A | . | PASS | KCTD9     | intrc | NM_ | .   | .        |
| ACa07 | 8 | 26363068 | .         | G | A | . | PASS | PNMA2     | UTF   | NM_ | NM_ | .        |
| ACa07 | 8 | 27369366 | rs7247582 | C | T | . | PASS | EPHX2     | exo   | NM_ | .   | missens  |
| ACa07 | 8 | 28929051 | .         | G | A | . | PASS | KIF13B    | intrc | NM_ | .   | .        |
| ACa07 | 8 | 30703725 | rs1419780 | G | A | . | PASS | TEX15     | exo   | NM_ | .   | stopgair |
| ACa07 | 8 | 33451130 | rs1198970 | G | A | . | PASS | DUSP2     | exo   | NM_ | .   | synonyr  |
| ACa07 | 8 | 36768413 | rs5320288 | C | T | . | PASS | KCNU1     | intrc | NM_ | .   | .        |
| ACa07 | 8 | 37598127 | .         | C | T | . | PASS | ERLIN2    | intrc | NM_ | .   | .        |
| ACa07 | 8 | 38272450 | rs7612284 | G | A | . | PASS | FGFR1     | intrc | NM_ | .   | .        |
| ACa07 | 8 | 38287473 | .         | C | T | . | PASS | FGFR1     | intrc | NM_ | .   | .        |
| ACa07 | 8 | 38684698 | rs7608102 | G | A | . | PASS | TACC1     | exo   | NM_ | .   | missens  |
| ACa07 | 8 | 39464012 | .         | T | C | . | PASS | ADAM1     | intrc | NM_ | .   | .        |
| ACa07 | 8 | 41507533 | .         | C | T | . | PASS | .         | inte  | NM_ | dis | .        |
| ACa07 | 8 | 41814697 | rs3705628 | G | A | . | PASS | KAT6A     | intrc | NM_ | .   | .        |
| ACa07 | 8 | 42227706 | rs7605197 | G | A | . | PASS | POLB      | intrc | NM_ | .   | .        |
| ACa07 | 8 | 43821054 | .         | G | A | . | PASS | .         | inte  | NM_ | dis | .        |
| ACa07 | 8 | 43821150 | rs3733322 | T | G | . | PASS | .         | inte  | NM_ | dis | .        |
| ACa07 | 8 | 43822425 | rs2003364 | T | C | . | PASS | .         | inte  | NM_ | dis | .        |
| ACa07 | 8 | 43831173 | .         | A | C | . | PASS | .         | inte  | NM_ | dis | .        |
| ACa07 | 8 | 46844208 | rs4498566 | A | C | . | PASS | .         | inte  | NON | dis | .        |
| ACa07 | 8 | 46844794 | .         | G | A | . | PASS | .         | inte  | NON | dis | .        |
| ACa07 | 8 | 46849434 | rs4401873 | C | G | . | PASS | .         | inte  | NON | dis | .        |
| ACa07 | 8 | 49641620 | .         | G | T | . | PASS | EFCAB     | exo   | NM_ | .   | missens  |
| ACa07 | 8 | 51415308 | .         | T | C | . | PASS | SNTG1     | intrc | NM_ | .   | .        |
| ACa07 | 8 | 53853631 | .         | A | G | . | PASS | .         | dow   | NM_ | .   | .        |
| ACa07 | 8 | 55591073 | rs1871956 | C | T | . | PASS | .         | inte  | NM_ | dis | .        |

|       |   |          |           |   |   |   |      |         |             |         |
|-------|---|----------|-----------|---|---|---|------|---------|-------------|---------|
| ACa07 | 8 | 55638925 | .         | G | A | . | PASS | .       | inte NM_dis | .       |
| ACa07 | 8 | 59548131 | .         | T | A | . | PASS | NSMAF   | intrc NM_   | .       |
| ACa07 | 8 | 61178562 | rs7793713 | G | A | . | PASS | CA8     | exo NM_     | synonyr |
| ACa07 | 8 | 61761171 | rs1513224 | C | T | . | PASS | CHD7    | intrc NM_   | .       |
| ACa07 | 8 | 66695246 | rs8897899 | G | A | . | PASS | PDE7A   | intrc NM_   | .       |
| ACa07 | 8 | 68070822 | .         | A | G | . | PASS | CSPP1   | exo NM_     | synonyr |
| ACa07 | 8 | 68105600 | .         | G | T | . | PASS | CSPP1   | intrc NM_   | .       |
| ACa07 | 8 | 69032380 | rs7454376 | G | A | . | PASS | PREX2   | intrc NM_   | .       |
| ACa07 | 8 | 74169239 | .         | G | A | . | PASS | C8orf89 | exo NM_     | missens |
| ACa07 | 8 | 76577776 | .         | C | T | . | PASS | .       | inte NM_dis | .       |
| ACa07 | 8 | 82392876 | .         | T | C | . | PASS | FABP4   | intrc NM_   | .       |
| ACa07 | 8 | 87670124 | .         | T | C | . | PASS | CNGB3   | intrc NM_   | .       |
| ACa07 | 8 | 87671445 | .         | G | A | . | PASS | CNGB3   | intrc NM_   | .       |
| ACa07 | 8 | 88395019 | rs1030919 | C | T | . | PASS | .       | dow NM_     | .       |
| ACa07 | 8 | 91057147 | rs7559645 | G | A | . | PASS | DECR1   | exo NM_     | missens |
| ACa07 | 8 | 91057203 | .         | G | A | . | PASS | DECR1   | exo NM_     | missens |
| ACa07 | 8 | 93074699 | .         | T | C | . | PASS | RUNX1   | intrc NM_   | .       |
| ACa07 | 8 | 95365674 | .         | G | A | . | PASS | .       | inte NM_dis | .       |
| ACa07 | 8 | 96087740 | rs1000299 | T | C | . | PASS | .       | inte NR_dis | .       |
| ACa07 | 8 | 98954359 | .         | T | A | . | PASS | MATN2   | intrc NM_   | .       |
| ACa07 | 8 | 1.02E+08 | .         | G | A | . | PASS | .       | ups NR_     | .       |
| ACa07 | 8 | 1.04E+08 | .         | G | A | . | PASS | .       | inte NM_dis | .       |
| ACa07 | 8 | 1.08E+08 | .         | C | T | . | PASS | OXR1    | UTF NM_NM   | .       |
| ACa07 | 8 | 1.11E+08 | .         | C | T | . | PASS | KCNV1   | exo NM_     | missens |
| ACa07 | 8 | 1.24E+08 | rs1493710 | C | T | . | PASS | ATAD2   | exo NM_     | missens |
| ACa07 | 8 | 1.25E+08 | .         | A | G | . | PASS | FER1L6  | exo NM_     | synonyr |
| ACa07 | 8 | 1.26E+08 | rs7626895 | C | T | . | PASS | .       | inte NM_dis | .       |
| ACa07 | 8 | 1.28E+08 | .         | C | T | . | PASS | PRNCR   | ncR NR_     | .       |
| ACa07 | 8 | 1.34E+08 | rs3595615 | G | A | . | PASS | LRRC6   | exo NM_     | synonyr |
| ACa07 | 8 | 1.34E+08 | rs1689333 | G | A | . | PASS | TG      | exo NM_     | missens |
| ACa07 | 8 | 1.41E+08 | .         | G | T | . | PASS | KCNK9   | UTF NM_NM   | .       |
| ACa07 | 8 | 1.41E+08 | .         | C | T | . | PASS | TRAPP   | (intrc NM_  | .       |
| ACa07 | 8 | 1.42E+08 | .         | C | A | . | PASS | DENND   | exo NM_     | synonyr |
| ACa07 | 8 | 1.42E+08 | .         | C | A | . | PASS | MROH5   | intrc NM_   | .       |
| ACa07 | 8 | 1.44E+08 | .         | C | T | . | PASS | BAI1    | intrc NM_   | .       |
| ACa07 | 8 | 1.44E+08 | .         | G | T | . | PASS | LY6H    | intrc NM_   | .       |
| ACa07 | 8 | 1.44E+08 | rs7598006 | C | T | . | PASS | ZFP41   | exo NM_     | missens |
| ACa07 | 8 | 1.45E+08 | rs5644139 | G | A | . | PASS | FAM83f  | exo NM_     | synonyr |
| ACa07 | 8 | 1.45E+08 | .         | G | T | . | PASS | FAM83f  | exo NM_     | missens |
| ACa07 | 8 | 1.45E+08 | rs7819090 | C | T | . | PASS | SCRIB   | exo NM_     | missens |
| ACa07 | 8 | 1.45E+08 | .         | C | T | . | PASS | NRBP2   | exo NM_     | missens |
| ACa07 | 8 | 1.45E+08 | .         | G | A | . | PASS | EPPK1   | exo NM_     | missens |
| ACa07 | 8 | 1.45E+08 | rs2000607 | G | A | . | PASS | PLEC    | exo NM_     | missens |
| ACa07 | 8 | 1.46E+08 | rs5565117 | C | T | . | PASS | HSF1    | intrc NM_   | .       |
| ACa07 | 8 | 1.46E+08 | .         | C | T | . | PASS | HSF1    | intrc NM_   | .       |
| ACa07 | 8 | 1.46E+08 | .         | G | A | . | PASS | CYHR1   | exo NM_     | missens |
| ACa07 | 8 | 1.46E+08 | rs7468927 | G | A | . | PASS | KIFC2   | exo NM_     | missens |
| ACa07 | 9 | 15883    | rs7123526 | A | G | . | PASS | WASH1   | intrc NM_   | .       |
| ACa07 | 9 | 4576210  | rs8987908 | C | T | . | PASS | SLC1A1  | intrc NM_   | .       |
| ACa07 | 9 | 13143465 | .         | C | A | . | PASS | MPDZ    | exo NM_     | missens |
| ACa07 | 9 | 14125770 | rs7591887 | G | A | . | PASS | NFIB    | intrc NM_   | .       |
| ACa07 | 9 | 14819391 | .         | C | T | . | PASS | FREM1   | exo NM_     | missens |
| ACa07 | 9 | 14851329 | rs7554261 | C | T | . | PASS | FREM1   | exo NM_     | missens |
| ACa07 | 9 | 15214070 | .         | C | T | . | PASS | TTC39E  | intrc NM_   | .       |

|       |                      |   |   |        |         |               |          |
|-------|----------------------|---|---|--------|---------|---------------|----------|
| ACa07 | 9 16436706 .         | G | A | . PASS | BNC2    | exon NM_      | missens  |
| ACa07 | 9 17143320 rs7717080 | G | A | . PASS | CNTLN   | exon NM_      | missens  |
| ACa07 | 9 19528050 .         | G | A | . PASS | SLC24A  | exon NM_      | synonym  |
| ACa07 | 9 20944746 rs7552126 | C | T | . PASS | FOCAD   | exon NM_      | unknown  |
| ACa07 | 9 21011377 rs8986502 | G | A | . PASS | PTPLA   | intron NM_    | .        |
| ACa07 | 9 32567140 rs7703822 | C | T | . PASS | NDUFB   | intron NM_    | .        |
| ACa07 | 9 34398403 .         | G | A | . PASS | FAM21   | UTR NM_NM     | .        |
| ACa07 | 9 35608407 .         | C | T | . PASS | TESK1   | exon NM_      | missens  |
| ACa07 | 9 37541389 .         | G | A | . PASS | FBXO1   | exon NM_      | missens  |
| ACa07 | 9 37746388 .         | G | A | . PASS | FRMPD   | exon NM_      | stopgain |
| ACa07 | 9 39078288 rs1616872 | A | G | . PASS | CNTNA   | intron NM_    | .        |
| ACa07 | 9 43915558 rs7820531 | G | C | . PASS | CNTNA   | exon NM_      | missens  |
| ACa07 | 9 47236563 rs6255281 | C | T | . PASS | .       | intron NR_dis | .        |
| ACa07 | 9 65602736 .         | C | T | . PASS | .       | intron NM_dis | .        |
| ACa07 | 9 66553866 rs2003121 | C | T | . PASS | .       | ncR NR_       | .        |
| ACa07 | 9 67867765 rs2016275 | G | A | . PASS | .       | intron NR_dis | .        |
| ACa07 | 9 68315458 rs2013763 | G | C | . PASS | .       | intron NM_dis | .        |
| ACa07 | 9 68371780 rs3764322 | A | G | . PASS | .       | intron NM_dis | .        |
| ACa07 | 9 68433386 .         | A | C | . PASS | LOC642  | ncR NR_       | .        |
| ACa07 | 9 70177694 .         | G | A | . PASS | FOXD4   | exon NM_      | missens  |
| ACa07 | 9 70177946 rs7506128 | G | A | . PASS | FOXD4   | exon NM_      | missens  |
| ACa07 | 9 73946728 .         | G | T | . PASS | .       | intron NM_dis | .        |
| ACa07 | 9 74365113 .         | G | T | . PASS | TMEM2   | exon NM_      | synonym  |
| ACa07 | 9 77692282 .         | C | A | . PASS | NMRK1   | intron NM_    | .        |
| ACa07 | 9 79239583 rs9660777 | T | C | . PASS | PRUNE   | intron NM_    | .        |
| ACa07 | 9 82006224 rs5294239 | G | A | . PASS | .       | intron NR_dis | .        |
| ACa07 | 9 82465778 .         | A | G | . PASS | .       | ncR NR_       | .        |
| ACa07 | 9 84608680 rs5696558 | G | A | . PASS | SPATA   | exon NM_      | missens  |
| ACa07 | 9 84676646 .         | G | A | . PASS | .       | intron NM_dis | .        |
| ACa07 | 9 86153164 rs7749802 | A | G | . PASS | FRMD3   | UTR NM_NM     | .        |
| ACa07 | 9 87635048 .         | G | A | . PASS | NTRK2   | intron NM_    | .        |
| ACa07 | 9 88923463 .         | C | T | . PASS | ZCCHC   | exon NM_      | missens  |
| ACa07 | 9 90473759 rs9367277 | C | T | . PASS | LOC392  | ncR NR_       | .        |
| ACa07 | 9 91686190 rs1447929 | C | T | . PASS | SHC3    | intron NM_    | .        |
| ACa07 | 9 95033689 .         | C | T | . PASS | IARS    | intron NM_    | .        |
| ACa07 | 9 95874687 .         | A | G | . PASS | C9orf89 | intron NM_    | .        |
| ACa07 | 9 96080176 rs5352400 | G | A | . PASS | WNK2    | exon NM_      | missens  |
| ACa07 | 9 96434042 .         | A | G | . PASS | PHF2    | intron NM_    | .        |
| ACa07 | 9 96441396 .         | A | G | . PASS | PHF2    | UTR NM_NM     | .        |
| ACa07 | 9 99150692 .         | C | T | . PASS | ZNF367  | exon NM_      | missens  |
| ACa07 | 9 99327874 rs5750212 | C | T | . PASS | CDC14   | intron NM_    | .        |
| ACa07 | 9 99580381 rs5664919 | C | T | . PASS | ZNF782  | exon NM_      | missens  |
| ACa07 | 9 1.01E+08 rs5346016 | G | A | . PASS | TBC1D2  | intron NM_    | .        |
| ACa07 | 9 1.08E+08 rs5275568 | G | A | . PASS | FSD1L   | intron NM_    | .        |
| ACa07 | 9 1.13E+08 .         | A | G | . PASS | SVEP1   | intron NM_    | .        |
| ACa07 | 9 1.15E+08 rs9418280 | C | T | . PASS | KIAA19  | exon NM_      | missens  |
| ACa07 | 9 1.15E+08 rs7534529 | C | T | . PASS | KIAA19  | exon NM_      | missens  |
| ACa07 | 9 1.16E+08 .         | G | T | . PASS | .       | dow NM_       | .        |
| ACa07 | 9 1.16E+08 .         | G | T | . PASS | ALAD    | intron NM_    | .        |
| ACa07 | 9 1.17E+08 rs1017044 | C | T | . PASS | COL27   | intron NM_    | .        |
| ACa07 | 9 1.17E+08 .         | C | T | . PASS | COL27   | intron NM_    | .        |
| ACa07 | 9 1.17E+08 rs5296296 | C | T | . PASS | COL27   | intron NM_    | .        |
| ACa07 | 9 1.17E+08 .         | C | A | . PASS | AKNA    | intron NM_    | .        |
| ACa07 | 9 1.19E+08 rs5393503 | G | A | . PASS | PAPPA   | exon NM_      | missens  |

|       |   |          |           |   |   |   |      |                     |       |     |   |         |
|-------|---|----------|-----------|---|---|---|------|---------------------|-------|-----|---|---------|
| ACa07 | 9 | 1.23E+08 | rs5770416 | C | T | . | PASS | CDK5R <sub>1</sub>  | intrc | NM_ | . | .       |
| ACa07 | 9 | 1.24E+08 | rs7765588 | C | T | . | PASS | PHF19               | intrc | NM_ | . | .       |
| ACa07 | 9 | 1.24E+08 | .         | A | G | . | PASS | PHF19               | intrc | NM_ | . | .       |
| ACa07 | 9 | 1.25E+08 | rs7817163 | C | T | . | PASS | DAB2IP              | exo   | NM_ | . | synonyr |
| ACa07 | 9 | 1.25E+08 | .         | G | T | . | PASS | DAB2IP              | exo   | NM_ | . | missens |
| ACa07 | 9 | 1.26E+08 | .         | C | A | . | PASS | STRBP               | intrc | NM_ | . | .       |
| ACa07 | 9 | 1.27E+08 | rs7671231 | C | T | . | PASS | NEK6                | intrc | NM_ | . | .       |
| ACa07 | 9 | 1.28E+08 | .         | T | C | . | PASS | MAPKA               | intrc | NM_ | . | .       |
| ACa07 | 9 | 1.3E+08  | .         | C | T | . | PASS | RALGP <sub>1</sub>  | intrc | NM_ | . | .       |
| ACa07 | 9 | 1.3E+08  | rs7704105 | C | T | . | PASS | LRSAM               | exo   | NM_ | . | synonyr |
| ACa07 | 9 | 1.3E+08  | rs7514371 | G | A | . | PASS | STXBP <sub>1</sub>  | exo   | NM_ | . | missens |
| ACa07 | 9 | 1.3E+08  | .         | C | A | . | PASS | TTC16               | intrc | NM_ | . | .       |
| ACa07 | 9 | 1.31E+08 | rs7724303 | C | T | . | PASS | FPGS                | exo   | NM_ | . | missens |
| ACa07 | 9 | 1.31E+08 | rs3755590 | C | T | . | PASS | ENG                 | intrc | NM_ | . | .       |
| ACa07 | 9 | 1.31E+08 | rs7704197 | C | T | . | PASS | ODF2                | exo   | NM_ | . | synonyr |
| ACa07 | 9 | 1.31E+08 | rs3700623 | G | A | . | PASS | SPTAN <sub>1</sub>  | exo   | NM_ | . | missens |
| ACa07 | 9 | 1.31E+08 | rs1020109 | C | T | . | PASS | SPTAN <sub>1</sub>  | exo   | NM_ | . | missens |
| ACa07 | 9 | 1.31E+08 | .         | T | C | . | PASS | SPTAN <sub>1</sub>  | intrc | NM_ | . | .       |
| ACa07 | 9 | 1.31E+08 | .         | C | T | . | PASS | SPTAN <sub>1</sub>  | intrc | NM_ | . | .       |
| ACa07 | 9 | 1.32E+08 | rs1200306 | C | T | . | PASS | ZER1                | intrc | NM_ | . | .       |
| ACa07 | 9 | 1.32E+08 | rs4837317 | T | C | . | PASS | CCBL1               | intrc | NM_ | . | .       |
| ACa07 | 9 | 1.32E+08 | rs4837318 | C | T | . | PASS | CCBL1               | intrc | NM_ | . | .       |
| ACa07 | 9 | 1.32E+08 | rs7690702 | G | A | . | PASS | DOLPP <sub>1</sub>  | exo   | NM_ | . | missens |
| ACa07 | 9 | 1.32E+08 | .         | G | A | . | PASS | CRAT                | intrc | NM_ | . | .       |
| ACa07 | 9 | 1.32E+08 | .         | G | A | . | PASS | CRAT                | exo   | NM_ | . | missens |
| ACa07 | 9 | 1.34E+08 | rs9375934 | C | T | . | PASS | RAPGE               | exo   | NM_ | . | synonyr |
| ACa07 | 9 | 1.35E+08 | .         | C | T | . | PASS | NTNG2               | intrc | NM_ | . | .       |
| ACa07 | 9 | 1.35E+08 | .         | C | T | . | PASS | SETX                | exo   | NM_ | . | missens |
| ACa07 | 9 | 1.36E+08 | rs4498679 | G | A | . | PASS | DDX31               | intrc | NM_ | . | .       |
| ACa07 | 9 | 1.36E+08 | .         | G | A | . | PASS | GTF3C <sub>1</sub>  | ncR   | NM_ | . | NM_     |
| ACa07 | 9 | 1.36E+08 | .         | C | T | . | PASS | RALGD <sub>1</sub>  | exo   | NM_ | . | missens |
| ACa07 | 9 | 1.36E+08 | .         | A | G | . | PASS | GBGT1               | exo   | NM_ | . | missens |
| ACa07 | 9 | 1.36E+08 | .         | G | T | . | PASS | SURF4               | intrc | NM_ | . | .       |
| ACa07 | 9 | 1.36E+08 | rs7823594 | G | A | . | PASS | STKLD1              | exo   | NM_ | . | missens |
| ACa07 | 9 | 1.36E+08 | rs7806069 | C | T | . | PASS | TMEM8               | exo   | NM_ | . | missens |
| ACa07 | 9 | 1.37E+08 | .         | G | T | . | PASS | DBH                 | exo   | NM_ | . | missens |
| ACa07 | 9 | 1.38E+08 | .         | C | T | . | PASS | COL5A <sub>1</sub>  | exo   | NM_ | . | missens |
| ACa07 | 9 | 1.38E+08 | rs6173790 | C | T | . | PASS | COL5A <sub>1</sub>  | exo   | NM_ | . | synonyr |
| ACa07 | 9 | 1.38E+08 | .         | G | A | . | PASS | COL5A <sub>1</sub>  | intrc | NM_ | . | .       |
| ACa07 | 9 | 1.39E+08 | rs7478355 | C | T | . | PASS | CAMSA               | exo   | NM_ | . | missens |
| ACa07 | 9 | 1.39E+08 | .         | C | A | . | PASS | GPSM1               | intrc | NM_ | . | .       |
| ACa07 | 9 | 1.39E+08 | rs9942197 | C | T | . | PASS | NOTCH               | intrc | NM_ | . | .       |
| ACa07 | 9 | 1.39E+08 | .         | C | A | . | PASS | NOTCH               | exo   | NM_ | . | missens |
| ACa07 | 9 | 1.39E+08 | .         | C | T | . | PASS | NOTCH               | intrc | NM_ | . | .       |
| ACa07 | 9 | 1.4E+08  | .         | G | A | . | PASS | FAM69E              | exo   | NM_ | . | missens |
| ACa07 | 9 | 1.4E+08  | .         | T | C | . | PASS | CCDC1 <sub>1</sub>  | ncR   | NR_ | . | .       |
| ACa07 | 9 | 1.4E+08  | rs1399152 | C | T | . | PASS | TRAF2               | exo   | NM_ | . | synonyr |
| ACa07 | 9 | 1.4E+08  | rs5651517 | C | T | . | PASS | MAN1B               | intrc | NM_ | . | .       |
| ACa07 | 9 | 1.4E+08  | rs7788028 | G | A | . | PASS | SLC34A <sub>1</sub> | intrc | NM_ | . | .       |
| ACa07 | 9 | 1.4E+08  | .         | C | A | . | PASS | FAM16C              | exo   | NM_ | . | missens |
| ACa07 | 9 | 1.4E+08  | rs7776402 | G | A | . | PASS | TOR4A               | exo   | NM_ | . | synonyr |
| ACa07 | 9 | 1.4E+08  | rs1126228 | C | T | . | PASS | PNPLA <sub>1</sub>  | intrc | NM_ | . | .       |
| ACa07 | 9 | 1.41E+08 | .         | G | A | . | PASS | EHMT1               | intrc | NM_ | . | .       |
| ACa07 | 9 | 1.41E+08 | rs3707879 | C | T | . | PASS | TUBBP <sub>1</sub>  | ncR   | NR_ | . | .       |

|       |    |          |           |   |   |   |      |         |       |        |         |   |
|-------|----|----------|-----------|---|---|---|------|---------|-------|--------|---------|---|
| ACa07 | 10 | 1053091  | rs7547454 | C | T | . | PASS | GTPBP1  | intrc | NM_    | .       | . |
| ACa07 | 10 | 1599286  | .         | C | A | . | PASS | ADARB1  | intrc | NM_    | .       | . |
| ACa07 | 10 | 3193659  | rs5680149 | C | T | . | PASS | PITRM1  | intrc | NM_    | .       | . |
| ACa07 | 10 | 5927584  | .         | A | T | . | PASS | ANKRD1  | intrc | NM_    | .       | . |
| ACa07 | 10 | 7262397  | rs2019140 | G | A | . | PASS | SFMBT1  | exo   | NM_    | missens |   |
| ACa07 | 10 | 7608771  | rs7961144 | G | A | . | PASS | ITIH5   | intrc | NM_    | .       | . |
| ACa07 | 10 | 7621760  | rs3708927 | C | T | . | PASS | ITIH5   | exo   | NM_    | missens |   |
| ACa07 | 10 | 8007776  | .         | C | A | . | PASS | TAF3    | intrc | NM_    | .       | . |
| ACa07 | 10 | 8055842  | .         | G | A | . | PASS | TAF3    | intrc | NM_    | .       | . |
| ACa07 | 10 | 9444396  | .         | C | A | . | PASS | .       | inte  | NR_dis | .       | . |
| ACa07 | 10 | 12110841 | .         | C | A | . | PASS | .       | ups   | NM_    | .       | . |
| ACa07 | 10 | 15027024 | rs1919845 | C | T | . | PASS | .       | inte  | NM_dis | .       | . |
| ACa07 | 10 | 17086956 | rs7658069 | G | A | . | PASS | CUBN    | intrc | NM_    | .       | . |
| ACa07 | 10 | 17142108 | .         | G | T | . | PASS | CUBN    | exo   | NM_    | missens |   |
| ACa07 | 10 | 20436609 | .         | C | T | . | PASS | PLXDC2  | intrc | NM_    | .       | . |
| ACa07 | 10 | 22193634 | rs9652901 | T | C | . | PASS | DNAJC1  | intrc | NM_    | .       | . |
| ACa07 | 10 | 24832764 | .         | A | T | . | PASS | KIAA127 | exo   | NM_    | missens |   |
| ACa07 | 10 | 24874959 | rs7647799 | T | C | . | PASS | ARHGA   | exo   | NM_    | missens |   |
| ACa07 | 10 | 24884596 | rs1999030 | A | G | . | PASS | ARHGA   | intrc | NM_    | .       | . |
| ACa07 | 10 | 26482239 | .         | A | G | . | PASS | MYO3A   | exo   | NM_    | missens |   |
| ACa07 | 10 | 26851385 | .         | A | G | . | PASS | APBB1   | intrc | NM_    | .       | . |
| ACa07 | 10 | 27324093 | rs3678495 | G | A | . | PASS | ANKRD1  | exo   | NM_    | missens |   |
| ACa07 | 10 | 27326015 | .         | G | T | . | PASS | ANKRD1  | intrc | NM_    | .       | . |
| ACa07 | 10 | 27539503 | .         | G | A | . | PASS | LRRC37  | ncR   | NR_    | .       | . |
| ACa07 | 10 | 29801633 | rs7766630 | G | A | . | PASS | SVIL    | intrc | NM_    | .       | . |
| ACa07 | 10 | 30915215 | rs5733337 | C | T | . | PASS | LYZL2   | intrc | NM_    | .       | . |
| ACa07 | 10 | 35819163 | .         | G | A | . | PASS | CCNY    | exo   | NM_    | missens |   |
| ACa07 | 10 | 44283476 | .         | G | A | . | PASS | HNRNP   | ncR   | NR_    | .       | . |
| ACa07 | 10 | 46204293 | .         | G | A | . | PASS | .       | inte  | NM_dis | .       | . |
| ACa07 | 10 | 47714165 | .         | A | G | . | PASS | .       | inte  | NM_dis | .       | . |
| ACa07 | 10 | 48919803 | .         | C | T | . | PASS | .       | inte  | NR_dis | .       | . |
| ACa07 | 10 | 48930140 | .         | G | A | . | PASS | BMS1P1  | ncR   | NR_    | .       | . |
| ACa07 | 10 | 49999086 | .         | G | A | . | PASS | WDFY4   | intrc | NM_    | .       | . |
| ACa07 | 10 | 50028381 | rs9040575 | G | A | . | PASS | WDFY4   | exo   | NM_    | missens |   |
| ACa07 | 10 | 50824107 | rs3745238 | G | A | . | PASS | CHAT    | exo   | NM_    | synonym |   |
| ACa07 | 10 | 52444579 | .         | C | A | . | PASS | .       | inte  | NR_dis | .       | . |
| ACa07 | 10 | 55664967 | rs7512474 | G | A | . | PASS | PCDH11  | intrc | NM_    | .       | . |
| ACa07 | 10 | 58583274 | .         | C | A | . | PASS | .       | inte  | NM_dis | .       | . |
| ACa07 | 10 | 61028449 | rs1389134 | G | A | . | PASS | FAM13C  | exo   | NM_    | missens |   |
| ACa07 | 10 | 61612621 | rs5737945 | A | G | . | PASS | CCDC6   | intrc | NM_    | .       | . |
| ACa07 | 10 | 70056519 | .         | G | A | . | PASS | PBLD    | intrc | NM_    | .       | . |
| ACa07 | 10 | 70958717 | .         | A | G | . | PASS | SUPV3L  | intrc | NM_    | .       | . |
| ACa07 | 10 | 71690164 | rs7548920 | C | T | . | PASS | COL13A1 | exo   | NM_    | synonym |   |
| ACa07 | 10 | 71880912 | .         | C | T | . | PASS | AIFM2   | exo   | NM_    | missens |   |
| ACa07 | 10 | 72358965 | rs3744653 | G | A | . | PASS | PRF1    | intrc | NM_    | .       | . |
| ACa07 | 10 | 73574769 | rs2017279 | C | T | . | PASS | CDH23   | exo   | NM_    | missens |   |
| ACa07 | 10 | 74790029 | .         | C | A | . | PASS | P4HA1   | exo   | NM_    | missens |   |
| ACa07 | 10 | 74994864 | .         | C | A | . | PASS | FAM14C  | intrc | NM_    | .       | . |
| ACa07 | 10 | 75238410 | rs7759506 | A | G | . | PASS | PPP3C1  | intrc | NM_    | .       | . |
| ACa07 | 10 | 75451768 | rs7802380 | A | G | . | PASS | AGAP5   | intrc | NM_    | .       | . |
| ACa07 | 10 | 75464614 | rs8789174 | A | G | . | PASS | BMS1P2  | ncR   | NR_    | .       | . |
| ACa07 | 10 | 75480330 | .         | C | T | . | PASS | BMS1P2  | ncR   | NR_    | .       | . |
| ACa07 | 10 | 78708754 | .         | A | G | . | PASS | KCNMA   | ncR   | NR_    | .       | . |
| ACa07 | 10 | 81701987 | .         | A | G | . | PASS | SFTPD   | intrc | NM_    | .       | . |



|       |    |          |           |   |   |   |      |          |       |     |           |
|-------|----|----------|-----------|---|---|---|------|----------|-------|-----|-----------|
| ACa07 | 10 | 82348450 | rs5681324 | C | T | . | PASS | SH2D4E   | exon  | NM_ | missens   |
| ACa07 | 10 | 85965536 | .         | C | T | . | PASS | CDHR1    | intrc | NM_ | .         |
| ACa07 | 10 | 85997052 | .         | C | T | . | PASS | LRIT1    | exon  | NM_ | synonyr   |
| ACa07 | 10 | 87898527 | .         | C | T | . | PASS | GRID1    | intrc | NM_ | .         |
| ACa07 | 10 | 93380017 | rs5296587 | C | T | . | PASS | .        | inte  | NR_ | dis.      |
| ACa07 | 10 | 94821012 | .         | G | A | . | PASS | .        | ups   | NM_ | .         |
| ACa07 | 10 | 95093021 | rs3696055 | G | A | . | PASS | MYOF     | exon  | NM_ | stopgair  |
| ACa07 | 10 | 95276988 | rs7535868 | G | A | . | PASS | CEP55    | exon  | NM_ | missens   |
| ACa07 | 10 | 96824534 | .         | G | T | . | PASS | CYP2C8   | intrc | NM_ | .         |
| ACa07 | 10 | 97712313 | rs9047130 | T | G | . | PASS | ENTPD1   | ncR   | NR_ | .         |
| ACa07 | 10 | 97987175 | rs7826084 | C | T | . | PASS | BLNK     | exon  | NM_ | NVmissens |
| ACa07 | 10 | 98510597 | .         | G | A | . | PASS | .        | inte  | NM_ | dis.      |
| ACa07 | 10 | 99514368 | rs3769880 | G | A | . | PASS | ZFYVE2   | intrc | NM_ | .         |
| ACa07 | 10 | 99661203 | rs9945308 | C | T | . | PASS | CRTAC    | intrc | NM_ | .         |
| ACa07 | 10 | 1.01E+08 | rs5392081 | G | A | . | PASS | HPSE2    | exon  | NM_ | missens   |
| ACa07 | 10 | 1.02E+08 | rs3692674 | C | T | . | PASS | CUTC     | exon  | NM_ | missens   |
| ACa07 | 10 | 1.02E+08 | rs9441434 | C | T | . | PASS | SEC31E   | intrc | NM_ | .         |
| ACa07 | 10 | 1.04E+08 | .         | G | A | . | PASS | PPRC1    | exon  | NM_ | missens   |
| ACa07 | 10 | 1.04E+08 | .         | A | G | . | PASS | PSD      | intrc | NM_ | .         |
| ACa07 | 10 | 1.04E+08 | .         | C | T | . | PASS | TRIM8    | intrc | NM_ | .         |
| ACa07 | 10 | 1.06E+08 | .         | C | A | . | PASS | COL17A1  | intrc | NM_ | .         |
| ACa07 | 10 | 1.06E+08 | .         | G | A | . | PASS | CFAP5E   | intrc | NM_ | .         |
| ACa07 | 10 | 1.07E+08 | .         | T | G | . | PASS | SORCS3   | intrc | NM_ | .         |
| ACa07 | 10 | 1.18E+08 | .         | C | T | . | PASS | GFRA1    | intrc | NM_ | .         |
| ACa07 | 10 | 1.19E+08 | .         | C | T | . | PASS | PDZD8    | exon  | NM_ | missens   |
| ACa07 | 10 | 1.21E+08 | .         | T | A | . | PASS | TIAL1    | intrc | NM_ | .         |
| ACa07 | 10 | 1.24E+08 | .         | A | G | . | PASS | BTBD16   | intrc | NM_ | .         |
| ACa07 | 10 | 1.27E+08 | rs7503782 | G | A | . | PASS | FAM171B  | exon  | NM_ | synonyr   |
| ACa07 | 10 | 1.29E+08 | .         | C | T | . | PASS | DOCK1    | exon  | NM_ | unknow    |
| ACa07 | 10 | 1.29E+08 | rs3765225 | C | T | . | PASS | DOCK1    | intrc | NM_ | .         |
| ACa07 | 10 | 1.3E+08  | .         | C | T | . | PASS | FOXJ2    | exon  | NM_ | missens   |
| ACa07 | 10 | 1.34E+08 | rs5455183 | G | A | . | PASS | PPP2R2   | intrc | NM_ | .         |
| ACa07 | 10 | 1.35E+08 | .         | G | T | . | PASS | NKX6-2   | exon  | NM_ | synonyr   |
| ACa07 | 10 | 1.35E+08 | .         | C | T | . | PASS | CFAP4C   | intrc | NM_ | .         |
| ACa07 | 10 | 1.35E+08 | rs5396027 | C | T | . | PASS | CFAP4C   | intrc | NM_ | .         |
| ACa07 | 10 | 1.35E+08 | .         | G | T | . | PASS | PRAP1    | exon  | NM_ | missens   |
| ACa07 | 10 | 1.35E+08 | .         | G | A | . | PASS | PAOX     | exon  | NM_ | synonyr   |
| ACa07 | 10 | 1.35E+08 | rs7793478 | G | A | . | PASS | PAOX     | intrc | NM_ | .         |
| ACa07 | 10 | 1.35E+08 | .         | G | A | . | PASS | PAOX     | intrc | NM_ | .         |
| ACa07 | 10 | 1.35E+08 | .         | T | C | . | PASS | MTG1     | intrc | NM_ | .         |
| ACa07 | 11 | 130618   | .         | G | T | . | PASS | LINC0101 | ncR   | NR_ | .         |
| ACa07 | 11 | 196075   | rs2003509 | C | A | . | PASS | .        | ups   | NM_ | .         |
| ACa07 | 11 | 237236   | .         | G | T | . | PASS | PSMD1    | intrc | NM_ | .         |
| ACa07 | 11 | 500049   | rs1008718 | G | A | . | PASS | RNH1     | intrc | NM_ | .         |
| ACa07 | 11 | 551871   | rs7793525 | C | T | . | PASS | LRRC5    | intrc | NM_ | .         |
| ACa07 | 11 | 556906   | rs3741463 | G | A | . | PASS | LMNTD1   | exon  | NM_ | missens   |
| ACa07 | 11 | 605299   | .         | A | G | . | PASS | PHRF1    | exon  | NM_ | missens   |
| ACa07 | 11 | 793447   | .         | G | T | . | PASS | SLC25A1  | intrc | NM_ | .         |
| ACa07 | 11 | 994418   | rs8960121 | G | A | . | PASS | AP2A2    | intrc | NM_ | .         |
| ACa07 | 11 | 1220701  | rs7582346 | G | A | . | PASS | .        | inte  | NM_ | dis.      |
| ACa07 | 11 | 1244666  | rs7514641 | G | A | . | PASS | MUC5B    | intrc | NM_ | .         |
| ACa07 | 11 | 1251120  | .         | T | C | . | PASS | MUC5B    | intrc | NM_ | .         |
| ACa07 | 11 | 1255481  | .         | G | A | . | PASS | MUC5B    | exon  | NM_ | synonyr   |
| ACa07 | 11 | 1257694  | .         | C | T | . | PASS | MUC5B    | exon  | NM_ | missens   |

|       |    |          |           |   |   |   |      |        |      |     |          |
|-------|----|----------|-----------|---|---|---|------|--------|------|-----|----------|
| ACa07 | 11 | 1281905  | rs3689865 | C | T | . | PASS | MUC5B  | exon | NM_ | synonym  |
| ACa07 | 11 | 2191119  | .         | A | G | . | PASS | TH     | intr | NM_ | .        |
| ACa07 | 11 | 2194374  | rs1019902 | C | T | . | PASS | .      | dow  | NR_ | .        |
| ACa07 | 11 | 2407268  | rs7724812 | G | A | . | PASS | CD81   | intr | NM_ | .        |
| ACa07 | 11 | 2431892  | .         | G | T | . | PASS | TRPM5  | intr | NM_ | .        |
| ACa07 | 11 | 2436853  | .         | G | A | . | PASS | TRPM5  | intr | NM_ | .        |
| ACa07 | 11 | 4254500  | rs5592355 | T | C | . | PASS | .      | inte | NR_ | dis.     |
| ACa07 | 11 | 4389369  | .         | T | C | . | PASS | OR52B2 | exon | NM_ | missens  |
| ACa07 | 11 | 5142343  | .         | G | A | . | PASS | .      | inte | NM_ | dis.     |
| ACa07 | 11 | 5655758  | rs8669468 | C | T | . | PASS | TRIM6  | intr | NM_ | .        |
| ACa07 | 11 | 6340358  | .         | G | A | . | PASS | PRKCD  | UTF  | NM_ | NM_      |
| ACa07 | 11 | 6417299  | rs7289628 | C | T | . | PASS | APBB1  | intr | NM_ | .        |
| ACa07 | 11 | 6644893  | .         | G | A | . | PASS | DCHS1  | exon | NM_ | stopgair |
| ACa07 | 11 | 6650772  | .         | C | T | . | PASS | DCHS1  | exon | NM_ | missens  |
| ACa07 | 11 | 12315642 | rs7595225 | C | T | . | PASS | MICALC | exon | NM_ | missens  |
| ACa07 | 11 | 13408180 | rs7811107 | C | T | . | PASS | ARNTL  | exon | NM_ | unknow   |
| ACa07 | 11 | 14277316 | .         | G | A | . | PASS | SPON1  | exon | NM_ | unknow   |
| ACa07 | 11 | 14316397 | rs7824579 | C | T | . | PASS | RRAS2  | exon | NM_ | missens  |
| ACa07 | 11 | 14865528 | .         | C | A | . | PASS | PDE3B  | exon | NM_ | missens  |
| ACa07 | 11 | 14913494 | .         | G | A | . | PASS | CYP2R1 | intr | NM_ | .        |
| ACa07 | 11 | 16838236 | .         | G | A | . | PASS | PLEKH7 | intr | NM_ | .        |
| ACa07 | 11 | 16847770 | rs7785451 | G | A | . | PASS | PLEKH7 | exon | NM_ | missens  |
| ACa07 | 11 | 17598431 | .         | G | A | . | PASS | OTOG   | exon | NM_ | missens  |
| ACa07 | 11 | 18062208 | .         | G | T | . | PASS | TPH1   | exon | NM_ | synonym  |
| ACa07 | 11 | 18210492 | .         | C | T | . | PASS | .      | inte | NM_ | dis.     |
| ACa07 | 11 | 18291106 | .         | G | T | . | PASS | SAA1   | intr | NM_ | .        |
| ACa07 | 11 | 18426449 | .         | C | A | . | PASS | LDHA   | intr | NM_ | .        |
| ACa07 | 11 | 20652143 | .         | A | C | . | PASS | SLC6A5 | intr | NM_ | .        |
| ACa07 | 11 | 21250898 | rs1146385 | G | A | . | PASS | NELL1  | exon | NM_ | missens  |
| ACa07 | 11 | 22777485 | .         | A | G | . | PASS | GAS2   | exon | NM_ | missens  |
| ACa07 | 11 | 23427305 | .         | A | T | . | PASS | .      | inte | NM_ | dis.     |
| ACa07 | 11 | 33743791 | .         | C | A | . | PASS | CD59   | intr | NM_ | .        |
| ACa07 | 11 | 34194650 | .         | C | T | . | PASS | ABTB2  | intr | NM_ | .        |
| ACa07 | 11 | 43876386 | .         | C | T | . | PASS | HSD17E | exon | NM_ | missens  |
| ACa07 | 11 | 46726773 | .         | G | A | . | PASS | ZNF408 | exon | NM_ | missens  |
| ACa07 | 11 | 46765806 | .         | G | A | . | PASS | CKAP5  | exon | NM_ | stopgair |
| ACa07 | 11 | 47193789 | rs7731977 | C | T | . | PASS | ARFGA1 | intr | NM_ | .        |
| ACa07 | 11 | 55135745 | .         | T | C | . | PASS | OR4A1  | exon | NM_ | missens  |
| ACa07 | 11 | 55371921 | rs7783566 | T | C | . | PASS | .      | ups  | NM_ | .        |
| ACa07 | 11 | 57314032 | .         | T | G | . | PASS | SMTNL  | exon | NM_ | missens  |
| ACa07 | 11 | 57983012 | rs7556226 | G | A | . | PASS | OR1S1  | exon | NM_ | missens  |
| ACa07 | 11 | 57995755 | rs3705153 | C | T | . | PASS | OR10Q  | exon | NM_ | missens  |
| ACa07 | 11 | 59420105 | rs7461600 | C | T | . | PASS | PATL1  | intr | NM_ | .        |
| ACa07 | 11 | 61249827 | rs7613895 | G | A | . | PASS | PPP1R3 | exon | NM_ | missens  |
| ACa07 | 11 | 61253132 | .         | C | A | . | PASS | PPP1R3 | intr | NM_ | .        |
| ACa07 | 11 | 61578304 | .         | G | T | . | PASS | FADS1  | exon | NM_ | synonym  |
| ACa07 | 11 | 62291713 | rs7506613 | G | A | . | PASS | AHNAK  | exon | NM_ | synonym  |
| ACa07 | 11 | 62361821 | rs3688014 | C | T | . | PASS | MTA2   | exon | NM_ | missens  |
| ACa07 | 11 | 62416338 | rs3734262 | C | T | . | PASS | INTS5  | exon | NM_ | missens  |
| ACa07 | 11 | 62566179 | .         | T | G | . | PASS | NXF1   | UTF  | NM_ | NM_      |
| ACa07 | 11 | 63721515 | rs7551956 | C | T | . | PASS | NAA40  | exon | NM_ | missens  |
| ACa07 | 11 | 63763957 | rs320149  | G | A | . | PASS | OTUB1  | intr | NM_ | .        |
| ACa07 | 11 | 64039354 | .         | T | A | . | PASS | BAD    | intr | NM_ | .        |
| ACa07 | 11 | 64521078 | rs7694797 | C | T | . | PASS | PYGM   | exon | NM_ | missens  |

|       |    |          |           |   |   |   |      |         |             |         |
|-------|----|----------|-----------|---|---|---|------|---------|-------------|---------|
| ACa07 | 11 | 64899776 | rs7599871 | G | A | . | PASS | SYVN1   | exo NM_     | synonyr |
| ACa07 | 11 | 64937741 | rs2009796 | C | T | . | PASS | SPDYC   | intrc NM_   | .       |
| ACa07 | 11 | 65036017 | .         | G | A | . | PASS | POLA2   | intrc NM_   | .       |
| ACa07 | 11 | 65360827 | .         | G | A | . | PASS | KCNK7   | exo NM_     | missens |
| ACa07 | 11 | 65381195 | .         | G | A | . | PASS | MAP3K   | exo NM_     | synonyr |
| ACa07 | 11 | 65389786 | rs3731576 | G | A | . | PASS | PCNXL   | exo NM_     | missens |
| ACa07 | 11 | 65414066 | .         | G | A | . | PASS | SIPA1   | exo NM_     | missens |
| ACa07 | 11 | 65414716 | .         | T | G | . | PASS | SIPA1   | intrc NM_   | .       |
| ACa07 | 11 | 65487375 | .         | G | A | . | PASS | RNASEI  | intrc NM_   | .       |
| ACa07 | 11 | 65810662 | .         | C | T | . | PASS | GAL3S1  | exo NM_     | synonyr |
| ACa07 | 11 | 66033554 | .         | C | T | . | PASS | KLC2    | intrc NM_   | .       |
| ACa07 | 11 | 66082361 | .         | C | T | . | PASS | CD248   | exo NM_     | missens |
| ACa07 | 11 | 66108304 | .         | T | C | . | PASS | BRMS1   | exo NM_     | missens |
| ACa07 | 11 | 67166750 | .         | G | A | . | PASS | PPP1C   | intrc NM_   | .       |
| ACa07 | 11 | 67378750 | rs8917540 | C | T | . | PASS | NDUFV   | intrc NM_   | .       |
| ACa07 | 11 | 67815194 | rs1432324 | C | T | . | PASS | TCIRG1  | exo NM_     | synonyr |
| ACa07 | 11 | 68822725 | rs7621382 | C | T | . | PASS | TPCN2   | exo NM_     | missens |
| ACa07 | 11 | 68851602 | .         | G | A | . | PASS | TPCN2   | intrc NM_   | .       |
| ACa07 | 11 | 70194192 | .         | A | G | . | PASS | PPFIA1  | intrc NM_   | .       |
| ACa07 | 11 | 71149990 | rs7726393 | C | T | . | PASS | DHCR7   | exo NM_     | missens |
| ACa07 | 11 | 71820226 | rs1917587 | G | A | . | PASS | LRTOM   | UTF NM_NM   | .       |
| ACa07 | 11 | 71931865 | .         | G | C | . | PASS | FOLR2   | intrc NM_   | .       |
| ACa07 | 11 | 72040728 | .         | C | A | . | PASS | CLPB    | intrc NM_   | .       |
| ACa07 | 11 | 72070285 | .         | A | G | . | PASS | CLPB    | intrc NM_   | .       |
| ACa07 | 11 | 72396522 | .         | C | A | . | PASS | ARAP1   | UTF NM_NM   | .       |
| ACa07 | 11 | 72651947 | .         | T | C | . | PASS | FCHSD   | intrc NM_   | .       |
| ACa07 | 11 | 73964648 | .         | G | A | . | PASS | PPME1   | UTF NM_NM   | .       |
| ACa07 | 11 | 74706128 | .         | C | T | . | PASS | NEU3    | intrc NM_   | .       |
| ACa07 | 11 | 74873801 | rs7806415 | G | A | . | PASS | SLCO2E  | exo NM_     | missens |
| ACa07 | 11 | 75316988 | rs7805688 | G | A | . | PASS | MAP6    | exo NM_     | missens |
| ACa07 | 11 | 75694576 | rs7453149 | C | T | . | PASS | UVRAG   | intrc NM_   | .       |
| ACa07 | 11 | 77918543 | .         | G | A | . | PASS | USP35   | intrc NM_   | .       |
| ACa07 | 11 | 80037592 | rs3722049 | G | C | . | PASS | .       | inte NM_dis | .       |
| ACa07 | 11 | 83501466 | .         | G | A | . | PASS | DLG2    | intrc NM_   | .       |
| ACa07 | 11 | 88300512 | .         | G | A | . | PASS | GRM5    | exo NM_     | missens |
| ACa07 | 11 | 89402770 | .         | G | A | . | PASS | FOLH1E  | intrc NM_   | .       |
| ACa07 | 11 | 93148372 | rs7912478 | G | A | . | PASS | CCDC6   | intrc NM_   | .       |
| ACa07 | 11 | 1.03E+08 | rs1913813 | G | A | . | PASS | DYNC2I  | exo NM_     | missens |
| ACa07 | 11 | 1.07E+08 | rs7548668 | G | A | . | PASS | GUCY1   | intrc NM_   | .       |
| ACa07 | 11 | 1.08E+08 | rs7639430 | C | T | . | PASS | ELMOD   | exo NM_     | missens |
| ACa07 | 11 | 1.08E+08 | .         | A | G | . | PASS | CUL5    | intrc NM_   | .       |
| ACa07 | 11 | 1.08E+08 | .         | T | C | . | PASS | ACAT1   | exo NM_     | synonyr |
| ACa07 | 11 | 1.08E+08 | .         | A | G | . | PASS | ATM     | intrc NM_   | .       |
| ACa07 | 11 | 1.11E+08 | rs5746434 | C | T | . | PASS | C11orf5 | UTF NM_NM   | .       |
| ACa07 | 11 | 1.11E+08 | rs1042921 | G | A | . | PASS | COLCA   | ncR NR_     | .       |
| ACa07 | 11 | 1.12E+08 | rs9738553 | C | T | . | PASS | SIK2    | intrc NM_   | .       |
| ACa07 | 11 | 1.14E+08 | rs7711773 | G | A | . | PASS | ZW10    | exo NM_     | synonyr |
| ACa07 | 11 | 1.15E+08 | rs7553780 | T | G | . | PASS | CADM1   | intrc NM_   | .       |
| ACa07 | 11 | 1.17E+08 | .         | C | T | . | PASS | SIK3    | exo NM_     | synonyr |
| ACa07 | 11 | 1.18E+08 | rs3706451 | C | A | . | PASS | TMPRS   | exo NM_     | synonyr |
| ACa07 | 11 | 1.18E+08 | .         | C | T | . | PASS | SCN2B   | exo NM_     | missens |
| ACa07 | 11 | 1.18E+08 | .         | G | T | . | PASS | MPZL3   | intrc NM_   | .       |
| ACa07 | 11 | 1.18E+08 | .         | C | A | . | PASS | ARCN1   | intrc NM_   | .       |
| ACa07 | 11 | 1.19E+08 | .         | G | A | . | PASS | DDX6    | exo NM_     | synonyr |

|       |    |          |           |   |   |   |      |         |             |              |          |
|-------|----|----------|-----------|---|---|---|------|---------|-------------|--------------|----------|
| ACa07 | 11 | 1.2E+08  | rs5761141 | T | C | . | PASS | ARHGE   | exo NM_     | synonyr      |          |
| ACa07 | 11 | 1.2E+08  | .         |   | C | A | .    | PASS    | ARHGE       | exo NM_      | missens  |
| ACa07 | 11 | 1.21E+08 | rs1424863 | C | T | . | PASS | TECTA   | exo NM_     | missens      |          |
| ACa07 | 11 | 1.24E+08 | rs1464053 | C | T | . | PASS | OR10G   | exo NM_     | missens      |          |
| ACa07 | 11 | 1.24E+08 | rs1866274 | C | T | . | PASS | OR8G2   | exo NM_     | unknow       |          |
| ACa07 | 11 | 1.25E+08 | .         |   | C | A | .    | PASS    | ROBO4       | intrc NM_    | .        |
| ACa07 | 11 | 1.25E+08 | .         |   | C | T | .    | PASS    | PKNOX       | exo NM_      | missens  |
| ACa07 | 11 | 1.26E+08 | rs1036245 | G | A | . | PASS | FOXRE   | exo NM_     | missens      |          |
| ACa07 | 11 | 1.29E+08 | rs1499597 | C | T | . | PASS | TP53Al1 | intrc NM_   | .            |          |
| ACa07 | 11 | 1.3E+08  | rs1160026 | G | T | . | PASS | PRDM1   | exo NM_     | synonyr      |          |
| ACa07 | 11 | 1.3E+08  | rs7501981 | G | A | . | PASS | ADAMT   | exo NM_     | missens      |          |
| ACa07 | 11 | 1.33E+08 | .         |   | G | T | .    | PASS    | OPCML       | exo NM_      | missens  |
| ACa07 | 11 | 1.34E+08 | rs9612999 | G | A | . | PASS | .       | inte NM_dis | .            |          |
| ACa07 | 11 | 1.34E+08 | .         |   | G | A | .    | PASS    | GLB1L3      | intrc NM_    | .        |
| ACa07 | 12 | 542634   | rs1492134 | C | T | . | PASS | CCDC7   | intrc NM_   | .            |          |
| ACa07 | 12 | 569498   | .         |   | G | A | .    | PASS    | .           | ups NM_      | .        |
| ACa07 | 12 | 663146   | rs7477402 | G | A | . | PASS | B4GAL1  | exo NM_     | missens      |          |
| ACa07 | 12 | 923046   | .         |   | G | T | .    | PASS    | WNK1        | intrc NM_    | .        |
| ACa07 | 12 | 2711100  | .         |   | C | T | .    | PASS    | CACNA       | exo NM_      | synonyr  |
| ACa07 | 12 | 2719715  | rs2020589 | C | T | . | PASS | CACNA   | exo NM_     | synonyr      |          |
| ACa07 | 12 | 2750942  | rs1044570 | G | A | . | PASS | CACNA   | intrc NM_   | .            |          |
| ACa07 | 12 | 3765346  | .         |   | C | T | .    | PASS    | CRACR       | intrc NM_    | .        |
| ACa07 | 12 | 4398171  | .         |   | C | A | .    | PASS    | CCND2       | intrc NM_    | .        |
| ACa07 | 12 | 4648013  | .         |   | G | T | .    | PASS    | RAD51/      | UTF NM_NV    | .        |
| ACa07 | 12 | 4919704  | .         |   | A | G | .    | PASS    | KCNA6       | exo NM_      | missens  |
| ACa07 | 12 | 6438497  | .         |   | G | A | .    | PASS    | TNFRSF      | exo NM_      | missens  |
| ACa07 | 12 | 6781789  | rs7522876 | C | T | . | PASS | ZNF384  | intrc NM_   | .            |          |
| ACa07 | 12 | 6923187  | .         |   | C | T | .    | PASS    | CD4         | intrc NM_    | .        |
| ACa07 | 12 | 7286388  | .         |   | C | A | .    | PASS    | CLSTN2      | intrc NM_    | .        |
| ACa07 | 12 | 7635360  | .         |   | T | C | .    | PASS    | CD163       | splix NM_NV  | .        |
| ACa07 | 12 | 8618152  | .         |   | T | A | .    | PASS    | CLEC6/      | exo NM_      | missens  |
| ACa07 | 12 | 8807044  | .         |   | G | A | .    | PASS    | MFAP5       | exo NM_      | unknow   |
| ACa07 | 12 | 9709589  | .         |   | A | G | .    | PASS    | .           | inte NR_dis  | .        |
| ACa07 | 12 | 9713438  | rs7607645 | T | C | . | PASS | .       | inte NR_dis | .            |          |
| ACa07 | 12 | 10131539 | .         |   | C | A | .    | PASS    | CLEC12      | intrc NM_    | .        |
| ACa07 | 12 | 11036605 | .         |   | G | A | .    | PASS    | PRH1-P      | ncR NR_      | .        |
| ACa07 | 12 | 11905325 | .         |   | C | A | .    | PASS    | ETV6        | intrc NM_    | .        |
| ACa07 | 12 | 12514214 | rs7520863 | C | T | . | PASS | LOH12C  | exo NM_     | unknow       |          |
| ACa07 | 12 | 12514275 | .         |   | T | C | .    | PASS    | LOH12C      | exo NM_      | unknow   |
| ACa07 | 12 | 13028428 | rs7558438 | C | T | . | PASS | RPL13A  | ncR NR_     | .            |          |
| ACa07 | 12 | 18644464 | .         |   | C | T | .    | PASS    | PIK3C2      | exo NM_      | missens  |
| ACa07 | 12 | 18656280 | .         |   | G | T | .    | PASS    | PIK3C2      | exo NM_      | stopgair |
| ACa07 | 12 | 19260709 | rs9411424 | A | C | . | PASS | .       | inte NM_dis | .            |          |
| ACa07 | 12 | 21377691 | .         |   | A | G | .    | PASS    | SLCO1F      | exo NM_      | missens  |
| ACa07 | 12 | 27840344 | .         |   | A | G | .    | PASS    | PPFIBP      | exo NM_      | synonyr  |
| ACa07 | 12 | 29493982 | .         |   | C | T | .    | PASS    | ERGIC2      | UTF NM_NV    | .        |
| ACa07 | 12 | 31116725 | rs3715564 | C | T | . | PASS | TSPAN1  | intrc NM_   | .            |          |
| ACa07 | 12 | 31144980 | .         |   | C | T | .    | PASS    | TSPAN1      | UTF NM_NV    | .        |
| ACa07 | 12 | 33139537 | .         |   | G | A | .    | PASS    | .           | inte NM_dis  | .        |
| ACa07 | 12 | 38596398 | .         |   | C | T | .    | PASS    | .           | inte NOI_dis | .        |
| ACa07 | 12 | 40858460 | .         |   | C | T | .    | PASS    | MUC19       | intrc NM_    | .        |
| ACa07 | 12 | 40894116 | .         |   | C | T | .    | PASS    | MUC19       | intrc NM_    | .        |
| ACa07 | 12 | 44132686 | .         |   | A | T | .    | PASS    | PUS7L       | intrc NM_    | .        |
| ACa07 | 12 | 48888693 | .         |   | A | C | .    | PASS    | C12orf5     | exo NM_      | missens  |

|       |    |          |           |   |   |   |      |         |       |        |         |
|-------|----|----------|-----------|---|---|---|------|---------|-------|--------|---------|
| ACa07 | 12 | 49165248 | .         | C | T | . | PASS | ADCY6   | intrc | NM_    | .       |
| ACa07 | 12 | 49725168 | .         | T | C | . | PASS | TROAP   | exo   | NM_    | missens |
| ACa07 | 12 | 50026472 | rs5557374 | G | A | . | PASS | PRPF4C  | intrc | NM_    | .       |
| ACa07 | 12 | 50036070 | rs7778437 | G | A | . | PASS | PRPF4C  | exo   | NM_    | missens |
| ACa07 | 12 | 50195577 | .         | A | G | . | PASS | NCKAP1  | intrc | NM_    | .       |
| ACa07 | 12 | 50471384 | rs7903986 | G | A | . | PASS | ASIC1   | intrc | NM_    | .       |
| ACa07 | 12 | 50854873 | .         | G | A | . | PASS | LARP4   | intrc | NM_    | .       |
| ACa07 | 12 | 51512439 | .         | T | C | . | PASS | TFCP2   | exo   | NM_    | missens |
| ACa07 | 12 | 52599942 | .         | A | G | . | PASS | C12orf8 | exo   | NM_    | missens |
| ACa07 | 12 | 52946871 | .         | G | T | . | PASS | KRT71   | UTF   | NM_NM  | .       |
| ACa07 | 12 | 53002235 | rs3777629 | C | T | . | PASS | KRT73   | exo   | NM_    | synonyr |
| ACa07 | 12 | 53045563 | rs5301800 | G | A | . | PASS | KRT2    | exo   | NM_    | missens |
| ACa07 | 12 | 53201610 | .         | C | T | . | PASS | KRT4    | exo   | NM_    | synonyr |
| ACa07 | 12 | 53459846 | .         | G | A | . | PASS | SPRYD1  | intrc | NM_    | .       |
| ACa07 | 12 | 53593996 | .         | C | T | . | PASS | ITGB7   | intrc | NM_    | .       |
| ACa07 | 12 | 53877615 | rs9039120 | G | A | . | PASS | MAP3K1  | intrc | NM_    | .       |
| ACa07 | 12 | 54426698 | .         | G | T | . | PASS | HOXC4   | intrc | NM_    | .       |
| ACa07 | 12 | 56645817 | rs3688610 | C | T | . | PASS | ANKRD1  | exo   | NM_    | missens |
| ACa07 | 12 | 57432280 | rs7688629 | C | T | . | PASS | MYO1A   | exo   | NM_    | missens |
| ACa07 | 12 | 57458056 | rs1929543 | T | A | . | PASS | TMEM1   | intrc | NM_    | .       |
| ACa07 | 12 | 57523017 | rs9453696 | G | C | . | PASS | LRP1    | intrc | NM_    | .       |
| ACa07 | 12 | 57567098 | .         | G | A | . | PASS | LRP1    | exo   | NM_    | missens |
| ACa07 | 12 | 57577325 | rs3702872 | G | A | . | PASS | LRP1    | intrc | NM_    | .       |
| ACa07 | 12 | 57584906 | .         | T | C | . | PASS | LRP1    | intrc | NM_    | .       |
| ACa07 | 12 | 57628071 | rs5363943 | G | A | . | PASS | SHMT2   | exo   | NM_    | missens |
| ACa07 | 12 | 63954420 | .         | T | G | . | PASS | DPY19L  | exo   | NM_    | missens |
| ACa07 | 12 | 64812712 | rs1809265 | C | T | . | PASS | XPOT    | exo   | NM_    | synonyr |
| ACa07 | 12 | 64825337 | .         | A | G | . | PASS | XPOT    | exo   | NM_    | missens |
| ACa07 | 12 | 69764543 | .         | A | G | . | PASS | YEATS2  | exo   | NM_    | unknow  |
| ACa07 | 12 | 69995116 | .         | G | A | . | PASS | CCT2    | UTF   | NM_NM  | .       |
| ACa07 | 12 | 70037457 | rs5319845 | C | T | . | PASS | BEST3   | UTF   | NM_NM  | .       |
| ACa07 | 12 | 72080578 | .         | A | C | . | PASS | TMEM1   | exo   | NM_    | missens |
| ACa07 | 12 | 76752585 | rs3675929 | C | T | . | PASS | OSBPL1  | exo   | NM_    | missens |
| ACa07 | 12 | 77260115 | .         | G | T | . | PASS | CSRP2   | intrc | NM_    | .       |
| ACa07 | 12 | 78582518 | .         | C | A | . | PASS | NAV3    | exo   | NM_    | missens |
| ACa07 | 12 | 78593259 | .         | G | T | . | PASS | NAV3    | exo   | NM_    | missens |
| ACa07 | 12 | 80672808 | rs7672581 | C | T | . | PASS | OTOGL   | exo   | NM_    | synonyr |
| ACa07 | 12 | 80760258 | rs9382701 | A | G | . | PASS | OTOGL   | intrc | NM_    | .       |
| ACa07 | 12 | 82828501 | .         | G | T | . | PASS | METTL2  | exo   | NM_    | missens |
| ACa07 | 12 | 94034649 | .         | C | T | . | PASS | .       | inte  | NM_dis | .       |
| ACa07 | 12 | 95918387 | .         | G | A | . | PASS | USP44   | intrc | NM_    | .       |
| ACa07 | 12 | 96717860 | rs5750458 | G | A | . | PASS | CDK17   | exo   | NM_    | missens |
| ACa07 | 12 | 97078469 | rs1491955 | G | A | . | PASS | .       | inte  | NM_dis | .       |
| ACa07 | 12 | 97222775 | .         | T | C | . | PASS | .       | inte  | NM_dis | .       |
| ACa07 | 12 | 1.01E+08 | rs7594794 | C | T | . | PASS | NR1H4   | exo   | NM_    | missens |
| ACa07 | 12 | 1.01E+08 | .         | C | T | . | PASS | ANO4    | intrc | NM_    | .       |
| ACa07 | 12 | 1.02E+08 | .         | A | G | . | PASS | ARL1    | intrc | NM_    | .       |
| ACa07 | 12 | 1.02E+08 | .         | G | T | . | PASS | MYBPC1  | intrc | NM_    | .       |
| ACa07 | 12 | 1.04E+08 | .         | G | T | . | PASS | STAB2   | exo   | NM_    | missens |
| ACa07 | 12 | 1.04E+08 | .         | G | A | . | PASS | TDG     | intrc | NM_    | .       |
| ACa07 | 12 | 1.09E+08 | .         | C | T | . | PASS | WSCD2   | intrc | NM_    | .       |
| ACa07 | 12 | 1.09E+08 | .         | C | T | . | PASS | SART3   | exo   | NM_    | missens |
| ACa07 | 12 | 1.1E+08  | .         | T | C | . | PASS | ALKBH2  | intrc | NM_    | .       |
| ACa07 | 12 | 1.1E+08  | .         | C | T | . | PASS | MYO1H   | intrc | NM_    | .       |

|       |    |          |           |   |   |   |      |        |              |         |
|-------|----|----------|-----------|---|---|---|------|--------|--------------|---------|
| ACa07 | 12 | 1.12E+08 | .         | G | T | . | PASS | .      | inte NM_dis. |         |
| ACa07 | 12 | 1.12E+08 | .         | C | A | . | PASS | BRAP   | UTF NM_NV.   |         |
| ACa07 | 12 | 1.13E+08 | rs3699442 | G | A | . | PASS | HECTD  | exo NM_.     | synonyr |
| ACa07 | 12 | 1.16E+08 | rs7648934 | C | T | . | PASS | MED13l | intrc NM_.   | .       |
| ACa07 | 12 | 1.18E+08 | .         | T | G | . | PASS | NOS1   | intrc NM_.   | .       |
| ACa07 | 12 | 1.19E+08 | .         | A | G | . | PASS | TAOK3  | intrc NM_.   | .       |
| ACa07 | 12 | 1.2E+08  | .         | G | T | . | PASS | TMEM2  | UTF NM_NV.   | .       |
| ACa07 | 12 | 1.21E+08 | rs9094398 | C | T | . | PASS | MLEC   | UTF NM_NV.   | .       |
| ACa07 | 12 | 1.21E+08 | rs7629138 | C | T | . | PASS | SPPL3  | UTF NM_NV.   | .       |
| ACa07 | 12 | 1.21E+08 | .         | A | T | . | PASS | OASL   | exo NM_.     | missens |
| ACa07 | 12 | 1.22E+08 | rs1000013 | G | A | . | PASS | P2RX4  | intrc NM_.   | .       |
| ACa07 | 12 | 1.22E+08 | .         | C | T | . | PASS | KDM2B  | intrc NM_.   | .       |
| ACa07 | 12 | 1.23E+08 | .         | G | T | . | PASS | CLIP1  | intrc NM_.   | .       |
| ACa07 | 12 | 1.23E+08 | .         | G | A | . | PASS | KNTC1  | intrc NM_.   | .       |
| ACa07 | 12 | 1.23E+08 | rs5485859 | G | A | . | PASS | HIP1R  | intrc NM_.   | .       |
| ACa07 | 12 | 1.24E+08 | .         | C | A | . | PASS | SBNO1  | intrc NM_.   | .       |
| ACa07 | 12 | 1.24E+08 | .         | G | A | . | PASS | SBNO1  | intrc NM_.   | .       |
| ACa07 | 12 | 1.24E+08 | .         | T | C | . | PASS | SETD8  | intrc NM_.   | .       |
| ACa07 | 12 | 1.24E+08 | rs3682772 | C | T | . | PASS | DNAH1  | (intrc NM_.  | .       |
| ACa07 | 12 | 1.24E+08 | .         | T | C | . | PASS | DNAH1  | (exo NM_.    | synonyr |
| ACa07 | 12 | 1.24E+08 | rs1861196 | G | A | . | PASS | DNAH1  | (intrc NM_.  | .       |
| ACa07 | 12 | 1.26E+08 | .         | T | G | . | PASS | TMEM1  | intrc NM_.   | .       |
| ACa07 | 12 | 1.29E+08 | .         | C | T | . | PASS | .      | inte NR_dis. | .       |
| ACa07 | 12 | 1.29E+08 | rs7758291 | C | T | . | PASS | TMEM1  | exo NM_.     | synonyr |
| ACa07 | 12 | 1.29E+08 | rs8685914 | G | A | . | PASS | GLT1D1 | intrc NM_.   | .       |
| ACa07 | 12 | 1.32E+08 | .         | G | T | . | PASS | EP400  | intrc NM_.   | .       |
| ACa07 | 12 | 1.33E+08 | .         | T | C | . | PASS | DDX51  | intrc NM_.   | .       |
| ACa07 | 12 | 1.33E+08 | .         | C | T | . | PASS | GALNT  | (intrc NM_.  | .       |
| ACa07 | 12 | 1.33E+08 | .         | C | T | . | PASS | CHFR   | exo NM_.     | missens |
| ACa07 | 13 | 20356757 | .         | C | T | . | PASS | PSPC1  | exo NM_.     | synonyr |
| ACa07 | 13 | 20656960 | .         | G | T | . | PASS | ZMYM2  | exo NM_.     | missens |
| ACa07 | 13 | 21974513 | rs7650516 | G | A | . | PASS | ZDHC   | exo NM_.     | missens |
| ACa07 | 13 | 23808767 | .         | G | A | . | PASS | SGCG   | exo NM_.     | synonyr |
| ACa07 | 13 | 27260004 | rs7609687 | G | A | . | PASS | WASF3  | UTF NM_NV.   | .       |
| ACa07 | 13 | 29233178 | .         | T | C | . | PASS | POMP   | UTF NM_NV.   | .       |
| ACa07 | 13 | 32813486 | .         | G | T | . | PASS | FRY    | exo NM_.     | missens |
| ACa07 | 13 | 34398037 | .         | T | G | . | PASS | RFC3   | intrc NM_.   | .       |
| ACa07 | 13 | 36445225 | .         | C | T | . | PASS | MIR548 | ncR NR_.     | .       |
| ACa07 | 13 | 36827965 | .         | C | T | . | PASS | CCDC1  | (exo NM_.    | missens |
| ACa07 | 13 | 37427588 | .         | T | C | . | PASS | SMAD9  | exo NM_.     | missens |
| ACa07 | 13 | 41797402 | rs1133145 | C | T | . | PASS | MTRF1  | exo NM_.     | missens |
| ACa07 | 13 | 43134008 | rs9269682 | G | A | . | PASS | .      | inte NM_dis. | .       |
| ACa07 | 13 | 46127182 | .         | G | A | . | PASS | ERICH6 | intrc NM_.   | .       |
| ACa07 | 13 | 46154301 | rs5302300 | C | T | . | PASS | ERICH6 | intrc NM_.   | .       |
| ACa07 | 13 | 47361123 | rs7755432 | C | T | . | PASS | ESD    | intrc NM_.   | .       |
| ACa07 | 13 | 71872859 | rs5354767 | C | T | . | PASS | .      | inte NR_dis. | .       |
| ACa07 | 13 | 72038778 | .         | A | C | . | PASS | DACH1  | intrc NM_.   | .       |
| ACa07 | 13 | 75911047 | .         | G | A | . | PASS | TBC1D  | (intrc NM_.  | .       |
| ACa07 | 13 | 90883912 | rs5371791 | C | T | . | PASS | .      | dow NR_.     | .       |
| ACa07 | 13 | 96240011 | .         | C | T | . | PASS | DZIP1  | intrc NM_.   | .       |
| ACa07 | 13 | 97999160 | rs1492005 | G | A | . | PASS | MBNL2  | exo NM_.     | missens |
| ACa07 | 13 | 1E+08    | rs3733851 | G | A | . | PASS | TM9SF  | (exo NM_.    | synonyr |
| ACa07 | 13 | 1.01E+08 | rs3731740 | C | T | . | PASS | PCCA   | intrc NM_.   | .       |
| ACa07 | 13 | 1.09E+08 | .         | T | C | . | PASS | ABHD1  | (exo NM_.    | missens |

|       |    |          |           |   |   |   |      |         |       |        |          |
|-------|----|----------|-----------|---|---|---|------|---------|-------|--------|----------|
| ACa07 | 13 | 1.09E+08 | rs7567578 | G | A | . | PASS | MYO16   | exon  | NM_    | missens  |
| ACa07 | 13 | 1.11E+08 | rs1488011 | G | A | . | PASS | COL4A1  | exon  | NM_    | missens  |
| ACa07 | 13 | 1.11E+08 | rs7563035 | G | A | . | PASS | CARS2   | exon  | NM_    | synonyr  |
| ACa07 | 13 | 1.11E+08 | .         | G | A | . | PASS | .       | ups   | NM_    | .        |
| ACa07 | 13 | 1.12E+08 | rs1000744 | C | T | . | PASS | ANKRD   | UTF   | NM_NM_ | .        |
| ACa07 | 13 | 1.14E+08 | rs7522048 | G | A | . | PASS | .       | inte  | NM_dis | .        |
| ACa07 | 13 | 1.14E+08 | rs7502995 | G | A | . | PASS | MCF2L   | exon  | NM_    | missens  |
| ACa07 | 13 | 1.15E+08 | rs7709821 | C | T | . | PASS | GAS6    | exon  | NM_    | missens  |
| ACa07 | 14 | 19501000 | rs8791117 | C | T | . | PASS | .       | inte  | NR_dis | .        |
| ACa07 | 14 | 19502175 | .         | G | T | . | PASS | .       | inte  | NR_dis | .        |
| ACa07 | 14 | 19720452 | rs7445485 | C | T | . | PASS | .       | inte  | NR_dis | .        |
| ACa07 | 14 | 20470724 | .         | A | G | . | PASS | .       | inte  | NM_dis | .        |
| ACa07 | 14 | 20869728 | rs1453568 | C | A | . | PASS | TEP1    | exon  | NM_    | missens  |
| ACa07 | 14 | 20897523 | rs5497679 | C | T | . | PASS | KLHL33  | exon  | NM_    | missens  |
| ACa07 | 14 | 21851762 | .         | C | T | . | PASS | SUPT16  | intrc | NM_    | .        |
| ACa07 | 14 | 22748944 | .         | T | C | . | PASS | .       | inte  | NM_dis | .        |
| ACa07 | 14 | 23244794 | rs3745810 | G | A | . | PASS | SLC7A7  | intrc | NM_    | .        |
| ACa07 | 14 | 23417206 | rs7576169 | G | A | . | PASS | HAUS4   | exon  | NM_    | synonyr  |
| ACa07 | 14 | 24032908 | .         | A | G | . | PASS | LOC102  | ncR   | NR_    | .        |
| ACa07 | 14 | 35557135 | rs7777607 | G | A | . | PASS | LOC101  | ncR   | NR_    | .        |
| ACa07 | 14 | 35564107 | rs9241538 | C | T | . | PASS | LOC101  | ncR   | NR_    | .        |
| ACa07 | 14 | 36123534 | .         | T | A | . | PASS | RALGAI  | ncR   | NR_    | .        |
| ACa07 | 14 | 36207787 | .         | C | A | . | PASS | RALGAI  | exon  | NM_    | missens  |
| ACa07 | 14 | 36645564 | .         | C | A | . | PASS | PTCSC1  | ncR   | NR_    | .        |
| ACa07 | 14 | 36840760 | rs5673369 | G | A | . | PASS | .       | inte  | NM_dis | .        |
| ACa07 | 14 | 38170628 | .         | C | T | . | PASS | .       | inte  | NM_dis | .        |
| ACa07 | 14 | 42361109 | rs8659367 | G | A | . | PASS | LRFN5   | exon  | NM_    | missens  |
| ACa07 | 14 | 45650729 | .         | T | C | . | PASS | FANCM   | splic | NM_NM_ | .        |
| ACa07 | 14 | 50459445 | .         | G | T | . | PASS | C14orf1 | intrc | NM_    | .        |
| ACa07 | 14 | 52536381 | .         | G | T | . | PASS | .       | ups   | NM_    | .        |
| ACa07 | 14 | 52782046 | rs7462395 | G | A | . | PASS | PTGER1  | exon  | NM_    | synonyr  |
| ACa07 | 14 | 58690314 | .         | A | T | . | PASS | ACTR1C  | intrc | NM_    | .        |
| ACa07 | 14 | 59757839 | .         | T | C | . | PASS | DAAM1   | intrc | NM_    | .        |
| ACa07 | 14 | 59792389 | .         | G | T | . | PASS | DAAM1   | exon  | NM_    | missens  |
| ACa07 | 14 | 59942751 | .         | T | C | . | PASS | L3HYP1  | intrc | NM_    | .        |
| ACa07 | 14 | 60619792 | rs1401803 | C | T | . | PASS | DHRS7   | exon  | NM_    | synonyr  |
| ACa07 | 14 | 64060705 | .         | A | G | . | PASS | .       | inte  | NM_dis | .        |
| ACa07 | 14 | 64905889 | rs5401543 | C | T | . | PASS | MTHFD   | exon  | NM_    | missens  |
| ACa07 | 14 | 66723885 | rs1404421 | C | T | . | PASS | .       | inte  | NM_dis | .        |
| ACa07 | 14 | 67432208 | .         | A | G | . | PASS | GPHN    | intrc | NM_    | .        |
| ACa07 | 14 | 69345661 | .         | C | T | . | PASS | ACTN1   | intrc | NM_    | .        |
| ACa07 | 14 | 74225682 | .         | C | T | . | PASS | ELMSA1  | intrc | NM_    | .        |
| ACa07 | 14 | 74371771 | rs7545827 | C | T | . | PASS | ZNF410  | exon  | NM_    | missens  |
| ACa07 | 14 | 74387833 | rs3764591 | C | T | . | PASS | ZNF410  | intrc | NM_    | .        |
| ACa07 | 14 | 75019057 | .         | A | G | . | PASS | LTBP2   | exon  | NM_    | missens  |
| ACa07 | 14 | 75231119 | .         | C | T | . | PASS | YLPM1   | intrc | NM_    | .        |
| ACa07 | 14 | 75320856 | .         | G | T | . | PASS | PROX2   | UTF   | NM_NM_ | .        |
| ACa07 | 14 | 75373816 | rs1413435 | G | A | . | PASS | RPS6K1  | exon  | NM_    | synonyr  |
| ACa07 | 14 | 90459861 | .         | C | A | . | PASS | TDP1    | intrc | NM_    | .        |
| ACa07 | 14 | 90759404 | .         | G | T | . | PASS | NRDE2   | intrc | NM_    | .        |
| ACa07 | 14 | 91161849 | rs7511076 | G | A | . | PASS | TTC7B   | exon  | NM_    | stopgair |
| ACa07 | 14 | 91701455 | rs7632995 | G | A | . | PASS | GPR68   | UTF   | NM_NM_ | .        |
| ACa07 | 14 | 91752050 | .         | G | A | . | PASS | CCDC8   | intrc | NM_    | .        |
| ACa07 | 14 | 94471264 | .         | G | A | . | PASS | LINC00  | ncR   | NR_    | .        |

|       |    |          |           |   |   |   |      |        |       |     |          |   |
|-------|----|----------|-----------|---|---|---|------|--------|-------|-----|----------|---|
| ACa07 | 14 | 94581845 | .         | C | T | . | PASS | IFI27  | intrc | NM_ | .        | . |
| ACa07 | 14 | 95560026 | .         | G | A | . | PASS | DICER1 | intrc | NM_ | .        | . |
| ACa07 | 14 | 99641990 | .         | A | G | . | PASS | BCL11E | exo   | NM_ | missens  | . |
| ACa07 | 14 | 99697789 | .         | G | T | . | PASS | BCL11E | exo   | NM_ | missens  | . |
| ACa07 | 14 | 1.01E+08 | .         | C | T | . | PASS | DLK1   | exo   | NM_ | synonyr  | . |
| ACa07 | 14 | 1.01E+08 | .         | T | C | . | PASS | MIR411 | ncR   | NR_ | .        | . |
| ACa07 | 14 | 1.02E+08 | .         | G | A | . | PASS | MIR381 | ncR   | NR_ | .        | . |
| ACa07 | 14 | 1.03E+08 | rs7571156 | G | A | . | PASS | MOK    | exo   | NM_ | synonyr  | . |
| ACa07 | 14 | 1.03E+08 | rs9721368 | C | T | . | PASS | CDC42E | intrc | NM_ | .        | . |
| ACa07 | 14 | 1.04E+08 | rs1043142 | C | T | . | PASS | TRMT6  | intrc | NM_ | .        | . |
| ACa07 | 14 | 1.05E+08 | .         | C | T | . | PASS | KIF26A | exo   | NM_ | missens  | . |
| ACa07 | 14 | 1.05E+08 | .         | G | T | . | PASS | TMEM1  | exo   | NM_ | missens  | . |
| ACa07 | 14 | 1.05E+08 | .         | C | T | . | PASS | SIVA1  | intrc | NM_ | .        | . |
| ACa07 | 14 | 1.05E+08 | rs7564163 | C | T | . | PASS | AKT1   | intrc | NM_ | .        | . |
| ACa07 | 14 | 1.05E+08 | .         | G | T | . | PASS | CEP17C | intrc | NM_ | .        | . |
| ACa07 | 14 | 1.06E+08 | rs7689001 | G | A | . | PASS | JAG2   | intrc | NM_ | .        | . |
| ACa07 | 14 | 1.06E+08 | .         | C | A | . | PASS | BRF1   | intrc | NM_ | .        | . |
| ACa07 | 14 | 1.06E+08 | rs7822187 | G | A | . | PASS | PACS2  | exo   | NM_ | missens  | . |
| ACa07 | 14 | 1.06E+08 | rs7820214 | C | T | . | PASS | .      | inte  | NR_ | dis      | . |
| ACa07 | 14 | 1.06E+08 | .         | G | A | . | PASS | ADAM6  | ncR   | NR_ | .        | . |
| ACa07 | 14 | 1.07E+08 | .         | C | T | . | PASS | .      | inte  | NR_ | dis      | . |
| ACa07 | 15 | 20511974 | rs2005484 | G | A | . | PASS | .      | inte  | NR_ | dis      | . |
| ACa07 | 15 | 21071136 | .         | C | T | . | PASS | POTEB  | intrc | NM_ | .        | . |
| ACa07 | 15 | 21324830 | .         | A | G | . | PASS | .      | inte  | NR_ | dis      | . |
| ACa07 | 15 | 22297633 | .         | A | G | . | PASS | LOC101 | ncR   | NR_ | .        | . |
| ACa07 | 15 | 22956666 | .         | C | T | . | PASS | CYFIP1 | intrc | NM_ | .        | . |
| ACa07 | 15 | 23099573 | .         | G | A | . | PASS | LOC283 | ncR   | NR_ | .        | . |
| ACa07 | 15 | 23419634 | .         | G | A | . | PASS | .      | intrc | NM_ | .        | . |
| ACa07 | 15 | 23467145 | .         | C | T | . | PASS | .      | intrc | NM_ | .        | . |
| ACa07 | 15 | 23686244 | rs7605191 | G | A | . | PASS | .      | inte  | NR_ | dis      | . |
| ACa07 | 15 | 25337269 | rs9195421 | G | A | . | PASS | .      | dow   | NR_ | .        | . |
| ACa07 | 15 | 25431213 | .         | G | A | . | PASS | .      | dow   | NR_ | .        | . |
| ACa07 | 15 | 25444465 | rs7485099 | T | C | . | PASS | .      | ups   | NR_ | .        | . |
| ACa07 | 15 | 25477642 | .         | A | G | . | PASS | .      | dow   | NR_ | .        | . |
| ACa07 | 15 | 26107216 | rs9209119 | G | A | . | PASS | ATP10A | intrc | NM_ | .        | . |
| ACa07 | 15 | 28358433 | rs3718584 | C | T | . | PASS | HERC2  | splic | NM_ | NM_      | . |
| ACa07 | 15 | 28478423 | .         | A | G | . | PASS | HERC2  | exo   | NM_ | missens  | . |
| ACa07 | 15 | 28949022 | rs2021672 | C | T | . | PASS | GOLGA  | exo   | NM_ | synonyr  | . |
| ACa07 | 15 | 29526740 | .         | G | T | . | PASS | FAM18E | intrc | NM_ | .        | . |
| ACa07 | 15 | 30382020 | .         | G | A | . | PASS | GOLGA  | exo   | NM_ | missens  | . |
| ACa07 | 15 | 30663208 | .         | C | T | . | PASS | CHRFAL | intrc | NM_ | .        | . |
| ACa07 | 15 | 30846509 | rs1995696 | A | G | . | PASS | .      | inte  | NM_ | dis      | . |
| ACa07 | 15 | 30874998 | .         | T | C | . | PASS | ULK4P1 | ncR   | NR_ | .        | . |
| ACa07 | 15 | 31776610 | .         | C | T | . | PASS | OTUD7  | exo   | NM_ | synonyr  | . |
| ACa07 | 15 | 32635938 | rs1127716 | A | T | . | PASS | .      | inte  | NM_ | dis      | . |
| ACa07 | 15 | 34040248 | .         | C | T | . | PASS | RYR3   | intrc | NM_ | .        | . |
| ACa07 | 15 | 35385280 | .         | G | A | . | PASS | .      | inte  | NM_ | dis      | . |
| ACa07 | 15 | 40568144 | .         | G | A | . | PASS | PAK6   | exo   | NM_ | missens  | . |
| ACa07 | 15 | 40589993 | .         | G | T | . | PASS | PLCB2  | intrc | NM_ | .        | . |
| ACa07 | 15 | 42158532 | rs3704110 | C | T | . | PASS | SPTBN1 | intrc | NM_ | .        | . |
| ACa07 | 15 | 42170858 | .         | G | A | . | PASS | SPTBN1 | intrc | NM_ | .        | . |
| ACa07 | 15 | 43109245 | rs5310947 | G | A | . | PASS | TTBK2  | exo   | NM_ | synonyr  | . |
| ACa07 | 15 | 43678043 | rs7551745 | C | T | . | PASS | TUBGC  | exo   | NM_ | stopgair | . |
| ACa07 | 15 | 43891133 | rs5360360 | C | T | . | PASS | CKMT1L | exo   | NM_ | stopgair | . |



|       |    |          |           |   |   |   |      |         |       |     |     |         |
|-------|----|----------|-----------|---|---|---|------|---------|-------|-----|-----|---------|
| ACa07 | 15 | 43901655 | .         | G | A | . | PASS | STRC    | intrc | NM_ | .   | .       |
| ACa07 | 15 | 44003289 | rs5322560 | G | A | . | PASS | .       | inte  | NM_ | dis | .       |
| ACa07 | 15 | 45328596 | .         | G | A | . | PASS | SORD    | intrc | NM_ | .   | .       |
| ACa07 | 15 | 45455872 | .         | G | T | . | PASS | DUOX1   | exo   | NM_ | .   | missens |
| ACa07 | 15 | 48054299 | .         | A | G | . | PASS | SEMA6I  | intrc | NM_ | .   | .       |
| ACa07 | 15 | 48720650 | rs7737859 | G | A | . | PASS | FBN1    | exo   | NM_ | .   | missens |
| ACa07 | 15 | 48782203 | rs1409544 | C | T | . | PASS | FBN1    | exo   | NM_ | .   | missens |
| ACa07 | 15 | 49264890 | .         | G | T | . | PASS | .       | inte  | NM_ | dis | .       |
| ACa07 | 15 | 49869190 | .         | A | G | . | PASS | FAM227  | intrc | NM_ | .   | .       |
| ACa07 | 15 | 50331173 | .         | G | T | . | PASS | ATP8B4  | intrc | NM_ | .   | .       |
| ACa07 | 15 | 50835793 | .         | A | G | . | PASS | USP50   | splie | NM_ | NM_ | .       |
| ACa07 | 15 | 52571126 | rs3686733 | G | A | . | PASS | MYO5C   | exo   | NM_ | .   | synonyr |
| ACa07 | 15 | 52680198 | .         | G | T | . | PASS | MYO5A   | intrc | NM_ | .   | .       |
| ACa07 | 15 | 58465302 | .         | T | C | . | PASS | AQP9    | exo   | NM_ | .   | missens |
| ACa07 | 15 | 63132757 | rs7793599 | G | A | . | PASS | TLN2    | exo   | NM_ | .   | missens |
| ACa07 | 15 | 65308790 | rs7518805 | C | T | . | PASS | MTFMT   | exo   | NM_ | .   | missens |
| ACa07 | 15 | 65678326 | .         | C | G | . | PASS | IGDCC2  | exo   | NM_ | .   | missens |
| ACa07 | 15 | 65686840 | rs5369412 | C | T | . | PASS | IGDCC2  | exo   | NM_ | .   | synonyr |
| ACa07 | 15 | 66223005 | .         | G | A | . | PASS | MEGF1   | intrc | NM_ | .   | .       |
| ACa07 | 15 | 67286477 | .         | T | C | . | PASS | .       | inte  | NM_ | dis | .       |
| ACa07 | 15 | 67652167 | .         | T | C | . | PASS | IQCH    | intrc | NM_ | .   | .       |
| ACa07 | 15 | 68502136 | rs7568129 | C | T | . | PASS | CLN6    | intrc | NM_ | .   | .       |
| ACa07 | 15 | 68624562 | .         | C | T | . | PASS | ITGA11  | intrc | NM_ | .   | .       |
| ACa07 | 15 | 72039013 | rs5460720 | C | T | . | PASS | THSD4   | intrc | NM_ | .   | .       |
| ACa07 | 15 | 72069450 | .         | C | A | . | PASS | THSD4   | intrc | NM_ | .   | .       |
| ACa07 | 15 | 72608191 | .         | G | A | . | PASS | CELF6   | exo   | NM_ | .   | missens |
| ACa07 | 15 | 72978799 | rs1043159 | C | A | . | PASS | BBS4    | intrc | NM_ | .   | .       |
| ACa07 | 15 | 74640093 | .         | G | A | . | PASS | CYP11A  | intrc | NM_ | .   | .       |
| ACa07 | 15 | 75551094 | .         | C | T | . | PASS | GOLGA   | intrc | NM_ | .   | .       |
| ACa07 | 15 | 75551112 | .         | C | T | . | PASS | GOLGA   | intrc | NM_ | .   | .       |
| ACa07 | 15 | 76643759 | rs9744245 | G | A | . | PASS | SCAPE1  | intrc | NM_ | .   | .       |
| ACa07 | 15 | 76643778 | rs1047518 | C | T | . | PASS | SCAPE1  | intrc | NM_ | .   | .       |
| ACa07 | 15 | 78217296 | rs8789048 | A | G | . | PASS | LOC645  | ncR   | NR_ | .   | .       |
| ACa07 | 15 | 78276624 | .         | G | T | . | PASS | .       | inte  | NR_ | dis | .       |
| ACa07 | 15 | 79065578 | .         | C | T | . | PASS | ADAMT   | intrc | NM_ | .   | .       |
| ACa07 | 15 | 79750037 | rs1471333 | C | T | . | PASS | KIAA10  | exo   | NM_ | .   | synonyr |
| ACa07 | 15 | 80445547 | .         | G | A | . | PASS | FAH     | intrc | NM_ | .   | .       |
| ACa07 | 15 | 81179994 | rs5292517 | G | A | . | PASS | CEMIP   | intrc | NM_ | .   | .       |
| ACa07 | 15 | 81427559 | .         | T | C | . | PASS | C15orf2 | intrc | NM_ | .   | .       |
| ACa07 | 15 | 84611197 | rs9410184 | C | T | . | PASS | ADAMT   | intrc | NM_ | .   | .       |
| ACa07 | 15 | 84908921 | rs7920451 | A | G | . | PASS | GOLGA   | exo   | NM_ | .   | missens |
| ACa07 | 15 | 86284204 | .         | G | A | . | PASS | AKAP13  | intrc | NM_ | .   | .       |
| ACa07 | 15 | 86311985 | rs3718116 | C | T | . | PASS | KLHL25  | exo   | NM_ | .   | missens |
| ACa07 | 15 | 89876682 | .         | G | A | . | PASS | POLG    | exo   | NM_ | .   | missens |
| ACa07 | 15 | 90029782 | .         | A | T | . | PASS | RHCG    | intrc | NM_ | .   | .       |
| ACa07 | 15 | 90188260 | rs2012804 | G | A | . | PASS | KIF7    | exo   | NM_ | .   | synonyr |
| ACa07 | 15 | 90192513 | .         | C | T | . | PASS | KIF7    | exo   | NM_ | .   | synonyr |
| ACa07 | 15 | 90610456 | rs1475111 | C | T | . | PASS | ZNF710  | exo   | NM_ | .   | unknow  |
| ACa07 | 15 | 1E+08    | rs5584446 | T | C | . | PASS | .       | ups   | NM_ | .   | .       |
| ACa07 | 15 | 1.01E+08 | .         | T | C | . | PASS | ADAMT   | exo   | NM_ | .   | synonyr |
| ACa07 | 15 | 1.01E+08 | .         | C | T | . | PASS | PRKXP   | ncR   | NR_ | .   | .       |
| ACa07 | 15 | 1.02E+08 | .         | G | T | . | PASS | LRRK1   | intrc | NM_ | .   | .       |
| ACa07 | 15 | 1.02E+08 | rs7764234 | G | A | . | PASS | PCSK6   | exo   | NM_ | .   | unknow  |
| ACa07 | 15 | 1.02E+08 | .         | C | A | . | PASS | TARSL2  | intrc | NM_ | .   | .       |

|       |    |          |           |   |   |   |      |         |             |         |
|-------|----|----------|-----------|---|---|---|------|---------|-------------|---------|
| ACa07 | 15 | 1.02E+08 | .         | G | A | . | PASS | .       | inte NM_dis | .       |
| ACa07 | 15 | 1.02E+08 | rs3682087 | G | A | . | PASS | .       | inte NM_dis | .       |
| ACa07 | 15 | 1.02E+08 | .         | C | T | . | PASS | .       | inte NM_dis | .       |
| ACa07 | 15 | 1.03E+08 | .         | A | G | . | PASS | DDX11L  | ncR NR_     | .       |
| ACa07 | 16 | 150424   | rs7613665 | G | A | . | PASS | NPRL3   | exo NM_     | unknow  |
| ACa07 | 16 | 314957   | .         | G | T | . | PASS | ITFG3   | exo NM_     | missens |
| ACa07 | 16 | 324844   | .         | G | A | . | PASS | RGS11   | intrc NM_   | .       |
| ACa07 | 16 | 544795   | rs8927038 | G | C | . | PASS | RAB11F  | intrc NM_   | .       |
| ACa07 | 16 | 682922   | rs1998911 | C | T | . | PASS | WFIKK1  | exo NM_     | missens |
| ACa07 | 16 | 721815   | rs2010028 | C | T | . | PASS | RHOT2   | intrc NM_   | .       |
| ACa07 | 16 | 734141   | rs7767345 | G | A | . | PASS | JMJD8   | exo NM_     | missens |
| ACa07 | 16 | 746934   | rs1466306 | C | T | . | PASS | FBXL16  | exo NM_     | missens |
| ACa07 | 16 | 780555   | rs3681933 | C | T | . | PASS | NARFL   | exo NM_     | synonyr |
| ACa07 | 16 | 847840   | .         | G | T | . | PASS | CHTF1f  | exo NM_     | synonyr |
| ACa07 | 16 | 960853   | .         | C | A | . | PASS | LMF1    | intrc NM_   | .       |
| ACa07 | 16 | 1129064  | rs1506415 | C | T | . | PASS | SSTR5   | exo NM_     | synonyr |
| ACa07 | 16 | 1365820  | rs9971019 | G | A | . | PASS | UBE2I   | intrc NM_   | .       |
| ACa07 | 16 | 1388641  | .         | A | T | . | PASS | BAIAP3  | exo NM_     | missens |
| ACa07 | 16 | 1390640  | rs3710800 | C | T | . | PASS | BAIAP3  | intrc NM_   | .       |
| ACa07 | 16 | 1391397  | .         | G | A | . | PASS | BAIAP3  | exo NM_     | missens |
| ACa07 | 16 | 1393987  | rs7592188 | C | T | . | PASS | BAIAP3  | intrc NM_   | .       |
| ACa07 | 16 | 1397792  | .         | G | A | . | PASS | BAIAP3  | exo NM_     | missens |
| ACa07 | 16 | 1479447  | rs5365360 | G | A | . | PASS | .       | inte NM_dis | .       |
| ACa07 | 16 | 1497508  | rs7601714 | C | T | . | PASS | CLCN7   | exo NM_     | missens |
| ACa07 | 16 | 1741777  | .         | C | T | . | PASS | HN1L    | intrc NM_   | .       |
| ACa07 | 16 | 1748934  | rs1450874 | C | T | . | PASS | HN1L    | exo NM_     | missens |
| ACa07 | 16 | 1798630  | .         | T | A | . | PASS | MAPK8l  | exo NM_     | synonyr |
| ACa07 | 16 | 2004033  | rs3749279 | G | A | . | PASS | RPL3L   | exo NM_     | synonyr |
| ACa07 | 16 | 2034966  | .         | C | A | . | PASS | GFER    | intrc NM_   | .       |
| ACa07 | 16 | 2049733  | rs7634894 | G | A | . | PASS | ZNF598  | exo NM_     | missens |
| ACa07 | 16 | 2215749  | .         | G | A | . | PASS | TRAF7   | intrc NM_   | .       |
| ACa07 | 16 | 2523602  | .         | T | C | . | PASS | NTN3    | intrc NM_   | .       |
| ACa07 | 16 | 3078076  | .         | G | A | . | PASS | CCDC6   | UTF NM_ NV  | .       |
| ACa07 | 16 | 3445074  | rs1416929 | C | T | . | PASS | ZSCAN1  | intrc NM_   | .       |
| ACa07 | 16 | 3487003  | .         | A | G | . | PASS | ZNF597  | exo NM_     | synonyr |
| ACa07 | 16 | 3580692  | rs7525617 | C | T | . | PASS | CLUAP1  | intrc NM_   | .       |
| ACa07 | 16 | 3646372  | rs5345285 | G | A | . | PASS | SLX4    | exo NM_     | missens |
| ACa07 | 16 | 3820858  | .         | C | A | . | PASS | CREBB1  | exo NM_     | missens |
| ACa07 | 16 | 3821078  | rs5502446 | T | A | . | PASS | CREBB1  | intrc NM_   | .       |
| ACa07 | 16 | 3843244  | rs1894802 | G | A | . | PASS | CREBB1  | intrc NM_   | .       |
| ACa07 | 16 | 4016487  | rs3711593 | C | T | . | PASS | ADCY9   | exo NM_     | synonyr |
| ACa07 | 16 | 4432151  | rs2013575 | C | T | . | PASS | VASN    | exo NM_     | missens |
| ACa07 | 16 | 4935715  | .         | G | T | . | PASS | PPL     | exo NM_     | missens |
| ACa07 | 16 | 10996015 | rs5632991 | G | A | . | PASS | CIITA   | exo NM_     | missens |
| ACa07 | 16 | 11008860 | rs7679436 | T | C | . | PASS | CIITA   | intrc NM_   | .       |
| ACa07 | 16 | 11554808 | rs9184234 | G | A | . | PASS | .       | inte NM_dis | .       |
| ACa07 | 16 | 14743630 | rs7800288 | A | G | . | PASS | BFAR    | intrc NM_   | .       |
| ACa07 | 16 | 15104125 | rs5668064 | G | A | . | PASS | PDXDC   | intrc NM_   | .       |
| ACa07 | 16 | 15474800 | rs7507758 | G | A | . | PASS | .       | inte NM_dis | .       |
| ACa07 | 16 | 15733133 | .         | C | T | . | PASS | KIAA041 | UTF NM_ NV  | .       |
| ACa07 | 16 | 15787881 | .         | C | T | . | PASS | NDE1    | intrc NM_   | .       |
| ACa07 | 16 | 16065490 | .         | G | A | . | PASS | ABCC1   | intrc NM_   | .       |
| ACa07 | 16 | 16459820 | .         | T | C | . | PASS | .       | inte NR_dis | .       |
| ACa07 | 16 | 18887501 | rs1784261 | A | T | . | PASS | SMG1    | exo NM_     | missens |

|       |    |          |           |   |   |   |      |         |        |     |         |
|-------|----|----------|-----------|---|---|---|------|---------|--------|-----|---------|
| ACa07 | 16 | 19194909 | rs7575963 | G | A | . | PASS | SYT17   | exon   | NM_ | missens |
| ACa07 | 16 | 20352562 | rs7647908 | G | A | . | PASS | UMOD    | exon   | NM_ | synonym |
| ACa07 | 16 | 21208820 | .         | C | A | . | PASS | ZP2     | exon   | NM_ | unknown |
| ACa07 | 16 | 22268950 | rs1829590 | C | T | . | PASS | EEF2K   | intron | NM_ | .       |
| ACa07 | 16 | 23494295 | .         | G | A | . | PASS | GGA2    | exon   | NM_ | missens |
| ACa07 | 16 | 23703312 | .         | C | T | . | PASS | ERN2    | exon   | NM_ | missens |
| ACa07 | 16 | 25180293 | rs9722593 | C | T | . | PASS | LCMT1   | intron | NM_ | .       |
| ACa07 | 16 | 26922879 | .         | G | T | . | PASS | .       | intron | NM_ | dis.    |
| ACa07 | 16 | 27549562 | .         | G | A | . | PASS | GTF3C   | exon   | NM_ | missens |
| ACa07 | 16 | 27732801 | .         | C | T | . | PASS | KIAA051 | intron | NM_ | .       |
| ACa07 | 16 | 27761369 | rs1412530 | G | A | . | PASS | KIAA051 | exon   | NM_ | missens |
| ACa07 | 16 | 28167926 | rs1909424 | A | T | . | PASS | XPO6    | intron | NM_ | .       |
| ACa07 | 16 | 28659481 | .         | G | A | . | PASS | .       | intron | NM_ | dis.    |
| ACa07 | 16 | 28846949 | rs7491998 | C | T | . | PASS | ATXN2L  | exon   | NM_ | missens |
| ACa07 | 16 | 28857656 | .         | T | C | . | PASS | TUFM    | UTR    | NM_ | NM_     |
| ACa07 | 16 | 28912047 | rs1820846 | G | A | . | PASS | ATP2A1  | exon   | NM_ | missens |
| ACa07 | 16 | 29140948 | .         | G | T | . | PASS | .       | intron | NR_ | dis.    |
| ACa07 | 16 | 29910712 | .         | G | T | . | PASS | .       | ups    | NM_ | .       |
| ACa07 | 16 | 29918302 | rs7813295 | C | T | . | PASS | KCTD13  | exon   | NM_ | missens |
| ACa07 | 16 | 31122275 | rs9659529 | G | A | . | PASS | BCKDK   | intron | NM_ | .       |
| ACa07 | 16 | 31160723 | .         | T | C | . | PASS | PRSS3f  | intron | NM_ | .       |
| ACa07 | 16 | 31374102 | .         | G | T | . | PASS | ITGAX   | intron | NM_ | .       |
| ACa07 | 16 | 31895845 | .         | C | A | . | PASS | ZNF267  | exon   | NM_ | synonym |
| ACa07 | 16 | 32487025 | rs7477221 | C | T | . | PASS | .       | intron | NR_ | dis.    |
| ACa07 | 16 | 33106981 | rs460256  | A | G | . | PASS | .       | intron | NR_ | dis.    |
| ACa07 | 16 | 33379986 | .         | A | G | . | PASS | .       | intron | NR_ | dis.    |
| ACa07 | 16 | 33393640 | .         | A | G | . | PASS | .       | intron | NR_ | dis.    |
| ACa07 | 16 | 33406888 | rs3744640 | G | C | . | PASS | .       | intron | NR_ | dis.    |
| ACa07 | 16 | 33516019 | .         | C | A | . | PASS | RNU6-7  | ncR    | NR_ | .       |
| ACa07 | 16 | 33738959 | .         | A | C | . | PASS | .       | intron | NR_ | dis.    |
| ACa07 | 16 | 34303978 | .         | C | G | . | PASS | .       | intron | NR_ | dis.    |
| ACa07 | 16 | 46386672 | rs1333894 | A | C | . | PASS | .       | intron | NON | dis.    |
| ACa07 | 16 | 46387429 | rs2885478 | C | T | . | PASS | .       | intron | NON | dis.    |
| ACa07 | 16 | 46391232 | rs4249087 | T | G | . | PASS | .       | intron | NON | dis.    |
| ACa07 | 16 | 46394845 | rs5591122 | C | T | . | PASS | .       | intron | NON | dis.    |
| ACa07 | 16 | 46395166 | rs4246405 | G | C | . | PASS | .       | intron | NON | dis.    |
| ACa07 | 16 | 46395251 | rs4292070 | G | C | . | PASS | .       | intron | NON | dis.    |
| ACa07 | 16 | 46399518 | rs8799648 | A | G | . | PASS | .       | intron | NON | dis.    |
| ACa07 | 16 | 46401894 | rs8799977 | A | C | . | PASS | .       | intron | NON | dis.    |
| ACa07 | 16 | 46405469 | rs4291933 | A | G | . | PASS | .       | intron | NON | dis.    |
| ACa07 | 16 | 46406401 | rs4375682 | A | G | . | PASS | .       | intron | NON | dis.    |
| ACa07 | 16 | 46406551 | rs7200104 | T | G | . | PASS | .       | intron | NON | dis.    |
| ACa07 | 16 | 46406785 | rs7188643 | A | G | . | PASS | .       | intron | NON | dis.    |
| ACa07 | 16 | 46406828 | rs9328642 | G | C | . | PASS | .       | intron | NON | dis.    |
| ACa07 | 16 | 46406854 | rs7205231 | T | A | . | PASS | .       | intron | NON | dis.    |
| ACa07 | 16 | 46407028 | rs4445923 | A | T | . | PASS | .       | intron | NON | dis.    |
| ACa07 | 16 | 46407752 | rs2887500 | T | G | . | PASS | .       | intron | NON | dis.    |
| ACa07 | 16 | 46408061 | rs2888543 | G | T | . | PASS | .       | intron | NON | dis.    |
| ACa07 | 16 | 46420322 | rs7664258 | G | A | . | PASS | .       | intron | NON | dis.    |
| ACa07 | 16 | 46421742 | rs4249076 | T | C | . | PASS | .       | intron | NON | dis.    |
| ACa07 | 16 | 46428673 | .         | T | C | . | PASS | .       | intron | NON | dis.    |
| ACa07 | 16 | 46781878 | rs3683497 | G | A | . | PASS | MYLK3   | exon   | NM_ | synonym |
| ACa07 | 16 | 47537111 | .         | C | A | . | PASS | PHKB    | intron | NM_ | .       |
| ACa07 | 16 | 56660201 | .         | C | A | . | PASS | MT1E    | intron | NM_ | .       |

|       |    |          |           |   |   |   |      |        |             |          |
|-------|----|----------|-----------|---|---|---|------|--------|-------------|----------|
| ACa07 | 16 | 56864520 | .         | G | T | . | PASS | NUP93  | exon NM_    | missense |
| ACa07 | 16 | 56871737 | .         | A | C | . | PASS | NUP93  | intron NM_  | .        |
| ACa07 | 16 | 57003671 | .         | G | A | . | PASS | CETP   | intron NM_  | .        |
| ACa07 | 16 | 57180194 | rs1471990 | C | T | . | PASS | CPNE2  | exon NM_    | synonym  |
| ACa07 | 16 | 57760660 | .         | T | C | . | PASS | DRC7   | intron NM_  | .        |
| ACa07 | 16 | 58019162 | .         | G | T | . | PASS | TEPP   | exon NM_    | missense |
| ACa07 | 16 | 58313479 | .         | A | G | . | PASS | CCDC1  | intron NM_  | .        |
| ACa07 | 16 | 64597212 | rs1499903 | A | G | . | PASS | .      | intron NM_  | dis.     |
| ACa07 | 16 | 67218882 | .         | C | T | . | PASS | EXOC3l | exon NM_    | missense |
| ACa07 | 16 | 67223187 | rs1054074 | A | G | . | PASS | EXOC3l | intron NM_  | .        |
| ACa07 | 16 | 67236430 | rs7715372 | C | T | . | PASS | ELMO3  | exon NM_    | synonym  |
| ACa07 | 16 | 67298343 | rs5618721 | G | A | . | PASS | SLC9A5 | exon NM_    | missense |
| ACa07 | 16 | 67324912 | .         | G | T | . | PASS | KCTD1f | intron NM_  | .        |
| ACa07 | 16 | 67404993 | rs7545456 | C | T | . | PASS | LRRC3f | exon NM_    | missense |
| ACa07 | 16 | 67432256 | rs3696380 | G | A | . | PASS | ZDHHC  | intron NM_  | .        |
| ACa07 | 16 | 67654782 | .         | C | A | . | PASS | CTCF   | intron NM_  | .        |
| ACa07 | 16 | 67964672 | rs7584347 | C | T | . | PASS | CTRL   | exon NM_    | missense |
| ACa07 | 16 | 67979591 | .         | C | A | . | PASS | SLC12A | intron NM_  | .        |
| ACa07 | 16 | 68056074 | .         | G | A | . | PASS | DDX28  | exon NM_    | synonym  |
| ACa07 | 16 | 69418494 | .         | C | T | . | PASS | TERF2  | exon NM_    | missense |
| ACa07 | 16 | 70363143 | rs8670174 | A | G | . | PASS | LOC10C | ncR NR_     | .        |
| ACa07 | 16 | 71464866 | rs9278778 | C | T | . | PASS | .      | intron NM_  | dis.     |
| ACa07 | 16 | 71465222 | rs1485518 | C | T | . | PASS | .      | intron NM_  | dis.     |
| ACa07 | 16 | 71976819 | rs3776990 | G | A | . | PASS | PKD1L3 | exon NM_    | unknown  |
| ACa07 | 16 | 74446298 | rs7502787 | G | T | . | PASS | CLEC1f | intron NM_  | .        |
| ACa07 | 16 | 74709365 | .         | C | T | . | PASS | MLKL   | intron NM_  | .        |
| ACa07 | 16 | 75300714 | .         | C | T | . | PASS | BCAR1  | intron NM_  | .        |
| ACa07 | 16 | 79781104 | rs1469198 | A | G | . | PASS | LOC102 | ncR NR_     | .        |
| ACa07 | 16 | 81157276 | rs7733922 | G | A | . | PASS | PKD1L2 | exon NM_    | unknown  |
| ACa07 | 16 | 81931297 | .         | T | C | . | PASS | PLCG2  | intron NM_  | .        |
| ACa07 | 16 | 83949765 | rs7483034 | C | T | . | PASS | MLYCD  | UTF NM_ NM_ | .        |
| ACa07 | 16 | 84193350 | rs1407517 | G | A | . | PASS | DNAAF  | exon NM_    | missense |
| ACa07 | 16 | 84213850 | rs7647118 | G | A | . | PASS | TAF1C  | exon NM_    | missense |
| ACa07 | 16 | 85690052 | rs9336865 | C | T | . | PASS | GSE1   | exon NM_    | missense |
| ACa07 | 16 | 86601246 | .         | T | A | . | PASS | FOXC2  | exon NM_    | missense |
| ACa07 | 16 | 87367554 | rs3681305 | C | T | . | PASS | FBXO3' | exon NM_    | synonym  |
| ACa07 | 16 | 87638598 | rs9665470 | T | C | . | PASS | JPH3   | intron NM_  | .        |
| ACa07 | 16 | 88500698 | rs5606502 | G | A | . | PASS | ZNF469 | exon NM_    | missense |
| ACa07 | 16 | 88721965 | rs9646181 | C | T | . | PASS | MVD    | intron NM_  | .        |
| ACa07 | 16 | 88945815 | .         | C | T | . | PASS | CBFA2l | exon NM_    | missense |
| ACa07 | 16 | 89758073 | .         | C | A | . | PASS | CDK10  | intron NM_  | .        |
| ACa07 | 16 | 89799935 | rs2017315 | G | A | . | PASS | ZNF276 | exon NM_    | synonym  |
| ACa07 | 16 | 89805198 | rs7530482 | G | A | . | PASS | ZNF276 | UTF NM_ NM_ | .        |
| ACa07 | 17 | 1375434  | rs7627705 | T | C | . | PASS | MYO1C  | exon NM_    | missense |
| ACa07 | 17 | 1562751  | .         | C | T | . | PASS | PRPF8  | exon NM_    | missense |
| ACa07 | 17 | 1610814  | .         | A | G | . | PASS | TLCD2  | UTF NM_ NM_ | .        |
| ACa07 | 17 | 1961007  | .         | T | C | . | PASS | HIC1   | exon NM_    | synonym  |
| ACa07 | 17 | 1988923  | .         | C | A | . | PASS | SMG6   | intron NM_  | .        |
| ACa07 | 17 | 2203721  | .         | G | T | . | PASS | SMG6   | exon NM_    | missense |
| ACa07 | 17 | 2290401  | rs7803486 | C | T | . | PASS | MNT    | exon NM_    | missense |
| ACa07 | 17 | 2323768  | .         | A | G | . | PASS | METTL' | exon NM_    | synonym  |
| ACa07 | 17 | 3765488  | .         | T | C | . | PASS | CAMKK  | UTF NM_ NM_ | .        |
| ACa07 | 17 | 4145515  | .         | A | C | . | PASS | ANKFY' | intron NM_  | .        |
| ACa07 | 17 | 4192509  | rs5506079 | C | T | . | PASS | UBE2G' | intron NM_  | .        |

|       |    |          |           |   |   |   |      |         |        |        |          |
|-------|----|----------|-----------|---|---|---|------|---------|--------|--------|----------|
| ACa07 | 17 | 4575748  | rs3764321 | C | T | . | PASS | PELP1   | exon   | NM_    | synonym  |
| ACa07 | 17 | 4926810  | rs2008227 | G | A | . | PASS | KIF1C   | exon   | NM_    | synonym  |
| ACa07 | 17 | 5085969  | rs2013516 | C | T | . | PASS | ZNF594  | exon   | NM_    | missense |
| ACa07 | 17 | 5367081  | .         | C | T | . | PASS | DHX33   | intron | NM_    | .        |
| ACa07 | 17 | 6493860  | .         | T | C | . | PASS | KIAA071 | exon   | NM_    | missense |
| ACa07 | 17 | 6599019  | .         | C | T | . | PASS | SLC13A1 | intron | NM_    | .        |
| ACa07 | 17 | 6980456  | .         | A | G | . | PASS | CLEC1E  | intron | NM_    | .        |
| ACa07 | 17 | 7226101  | rs2000463 | G | A | . | PASS | NEURL1  | exon   | NM_    | missense |
| ACa07 | 17 | 7401521  | rs7455911 | G | A | . | PASS | POLR2J  | exon   | NM_    | missense |
| ACa07 | 17 | 8638873  | rs1473707 | G | A | . | PASS | CCDC4   | exon   | NM_    | synonym  |
| ACa07 | 17 | 8732222  | .         | C | T | . | PASS | PIK3R6  | exon   | NM_    | unknown  |
| ACa07 | 17 | 9873083  | .         | C | T | . | PASS | GAS7    | splice | NM_NM  | .        |
| ACa07 | 17 | 11556040 | rs7534759 | A | G | . | PASS | DNAH9   | intron | NM_    | .        |
| ACa07 | 17 | 11835436 | .         | G | T | . | PASS | DNAH9   | exon   | NM_    | stopgain |
| ACa07 | 17 | 14205156 | .         | C | T | . | PASS | HS3ST3  | exon   | NM_    | synonym  |
| ACa07 | 17 | 15207385 | rs7633797 | C | T | . | PASS | TEKT3   | exon   | NM_    | synonym  |
| ACa07 | 17 | 15638786 | rs6207237 | G | A | . | PASS | TBC1D2  | intron | NM_    | .        |
| ACa07 | 17 | 15938128 | .         | G | A | . | PASS | NCOR1   | exon   | NM_    | synonym  |
| ACa07 | 17 | 15961112 | .         | T | C | . | PASS | NCOR1   | intron | NM_    | .        |
| ACa07 | 17 | 17030234 | .         | C | T | . | PASS | MPRIP   | intron | NM_    | .        |
| ACa07 | 17 | 17034866 | .         | G | A | . | PASS | MPRIP   | intron | NM_    | .        |
| ACa07 | 17 | 18058365 | rs1157965 | G | A | . | PASS | MYO15B  | intron | NM_    | .        |
| ACa07 | 17 | 18060466 | .         | A | G | . | PASS | MYO15B  | splice | NM_NM  | .        |
| ACa07 | 17 | 18286697 | .         | G | A | . | PASS | EVPL1   | intron | NM_    | .        |
| ACa07 | 17 | 20361613 | .         | C | A | . | PASS | LGALS3  | exon   | NM_    | synonym  |
| ACa07 | 17 | 20370796 | rs2869918 | T | C | . | PASS | LGALS3  | UTR    | NM_NM  | .        |
| ACa07 | 17 | 20916264 | rs7529523 | G | A | . | PASS | USP22   | intron | NM_    | .        |
| ACa07 | 17 | 21207962 | .         | G | A | . | PASS | MAP2K1  | intron | NM_    | .        |
| ACa07 | 17 | 26084555 | .         | C | T | . | PASS | NOS2    | intron | NM_    | .        |
| ACa07 | 17 | 26816533 | .         | A | T | . | PASS | SLC13A1 | intron | NM_    | .        |
| ACa07 | 17 | 26820830 | .         | G | T | . | PASS | SLC13A1 | intron | NM_    | .        |
| ACa07 | 17 | 26850910 | .         | C | T | . | PASS | .       | ups    | NM_    | .        |
| ACa07 | 17 | 26932168 | .         | C | T | . | PASS | SPAG5   | ncR    | NR_    | .        |
| ACa07 | 17 | 26940926 | rs1051245 | C | T | . | PASS | SPAG5   | ncR    | NR_    | .        |
| ACa07 | 17 | 26962672 | .         | A | G | . | PASS | KIAA011 | intron | NM_    | .        |
| ACa07 | 17 | 27308994 | .         | C | T | . | PASS | SEZ6    | exon   | NM_    | missense |
| ACa07 | 17 | 27436897 | .         | C | T | . | PASS | MYO18B  | exon   | NM_    | missense |
| ACa07 | 17 | 28557113 | rs7968757 | A | G | . | PASS | SLC6A4  | intron | NM_    | .        |
| ACa07 | 17 | 29645931 | rs5324904 | C | T | . | PASS | EVI2A   | exon   | NM_    | missense |
| ACa07 | 17 | 29848139 | .         | G | T | . | PASS | RAB11F  | intron | NM_    | .        |
| ACa07 | 17 | 30192707 | .         | A | G | . | PASS | UTP6    | intron | NM_    | .        |
| ACa07 | 17 | 30211542 | .         | G | T | . | PASS | UTP6    | intron | NM_    | .        |
| ACa07 | 17 | 32905761 | .         | G | T | . | PASS | C17orf1 | intron | NM_    | .        |
| ACa07 | 17 | 33462347 | .         | G | A | . | PASS | NLE1    | exon   | NM_    | missense |
| ACa07 | 17 | 33679688 | rs7610872 | C | T | . | PASS | SLFN11  | exon   | NM_    | missense |
| ACa07 | 17 | 33818178 | .         | G | T | . | PASS | .       | inte   | NM_dis | .        |
| ACa07 | 17 | 34036160 | .         | C | A | . | PASS | AP2B1   | intron | NM_    | .        |
| ACa07 | 17 | 34797287 | rs3702689 | T | G | . | PASS | TBC1D3  | UTR    | NM_NM  | .        |
| ACa07 | 17 | 36349473 | rs3720623 | T | C | . | PASS | .       | ups    | NM_    | .        |
| ACa07 | 17 | 36646848 | .         | A | G | . | PASS | ARHGA   | intron | NM_    | .        |
| ACa07 | 17 | 36895087 | rs7545869 | C | T | . | PASS | PCGF2   | exon   | NM_    | missense |
| ACa07 | 17 | 37243776 | .         | G | T | . | PASS | PLXDC1  | intron | NM_    | .        |
| ACa07 | 17 | 37351190 | rs7807350 | G | A | . | PASS | CACNB   | exon   | NM_    | missense |
| ACa07 | 17 | 37359163 | .         | C | T | . | PASS | RPL19   | intron | NM_    | .        |

|       |    |          |           |   |   |   |      |         |       |     |         |
|-------|----|----------|-----------|---|---|---|------|---------|-------|-----|---------|
| ACa07 | 17 | 37371354 | .         | C | T | . | PASS | STAC2   | intrc | NM_ | .       |
| ACa07 | 17 | 37881332 | rs1057519 | G | A | . | PASS | ERBB2   | exo   | NM_ | missens |
| ACa07 | 17 | 38711777 | rs1996216 | C | T | . | PASS | CCR7    | exo   | NM_ | synonyr |
| ACa07 | 17 | 39535402 | rs1488746 | C | T | . | PASS | KRT34   | exo   | NM_ | synonyr |
| ACa07 | 17 | 39959567 | rs7824576 | C | T | . | PASS | LEPREL  | exo   | NM_ | synonyr |
| ACa07 | 17 | 40094785 | rs7827568 | G | A | . | PASS | TTC25   | intrc | NM_ | .       |
| ACa07 | 17 | 40107195 | .         | A | G | . | PASS | TTC25   | intrc | NM_ | .       |
| ACa07 | 17 | 40477116 | .         | G | T | . | PASS | STAT3   | intrc | NM_ | .       |
| ACa07 | 17 | 40485855 | rs9065729 | G | A | . | PASS | STAT3   | intrc | NM_ | .       |
| ACa07 | 17 | 40491207 | rs5769204 | G | A | . | PASS | STAT3   | intrc | NM_ | .       |
| ACa07 | 17 | 40715885 | .         | G | T | . | PASS | COASY   | intrc | NM_ | .       |
| ACa07 | 17 | 40940950 | rs1042659 | C | T | . | PASS | WNK4    | intrc | NM_ | .       |
| ACa07 | 17 | 41296281 | rs9984123 | C | T | . | PASS | NBR2    | ncR   | NR_ | .       |
| ACa07 | 17 | 41341298 | .         | A | G | . | PASS | NBR1    | intrc | NM_ | .       |
| ACa07 | 17 | 41455004 | .         | G | A | . | PASS | LINC009 | ncR   | NR_ | .       |
| ACa07 | 17 | 41893443 | .         | G | T | . | PASS | MPP3    | exo   | NM_ | synonyr |
| ACa07 | 17 | 41893978 | .         | C | A | . | PASS | MPP3    | intrc | NM_ | .       |
| ACa07 | 17 | 41898415 | rs7617924 | G | A | . | PASS | MPP3    | exo   | NM_ | synonyr |
| ACa07 | 17 | 42745490 | .         | T | G | . | PASS | C17orf1 | exo   | NM_ | synonyr |
| ACa07 | 17 | 43004248 | rs9135110 | C | T | . | PASS | KIF18B  | intrc | NM_ | .       |
| ACa07 | 17 | 43215415 | .         | G | T | . | PASS | ACBD4   | intrc | NM_ | .       |
| ACa07 | 17 | 43322422 | rs7805429 | C | T | . | PASS | FMNL1   | exo   | NM_ | missens |
| ACa07 | 17 | 43531652 | .         | C | T | . | PASS | PLEKH   | intrc | NM_ | .       |
| ACa07 | 17 | 43585815 | .         | C | T | . | PASS | LRRC37  | ncR   | NR_ | .       |
| ACa07 | 17 | 44363438 | .         | G | A | . | PASS | .       | inte  | NR_ | dis.    |
| ACa07 | 17 | 44806355 | rs1002396 | G | A | . | PASS | NSF     | intrc | NM_ | .       |
| ACa07 | 17 | 45128939 | rs1056060 | A | G | . | PASS | .       | inte  | NM_ | dis.    |
| ACa07 | 17 | 45664593 | rs2644320 | C | T | . | PASS | NPEPP   | splc  | NM_ | NM_     |
| ACa07 | 17 | 45886991 | .         | A | G | . | PASS | OSBPL   | intrc | NM_ | .       |
| ACa07 | 17 | 47294019 | rs3749157 | G | A | . | PASS | ABI3    | exo   | NM_ | missens |
| ACa07 | 17 | 47376105 | rs9379553 | G | A | . | PASS | ZNF652  | exo   | NM_ | synonyr |
| ACa07 | 17 | 48051439 | .         | G | T | . | PASS | DLX4    | UTF   | NM_ | NM_     |
| ACa07 | 17 | 48195592 | rs7784106 | C | T | . | PASS | SAMD1   | exo   | NM_ | missens |
| ACa07 | 17 | 48218827 | .         | C | A | . | PASS | PPP1R   | intrc | NM_ | .       |
| ACa07 | 17 | 48227017 | .         | G | A | . | PASS | PPP1R   | exo   | NM_ | unknow  |
| ACa07 | 17 | 48267799 | rs1029268 | C | T | . | PASS | COL1A   | intrc | NM_ | .       |
| ACa07 | 17 | 48432555 | .         | G | T | . | PASS | XYLT2   | intrc | NM_ | .       |
| ACa07 | 17 | 48602100 | rs3894278 | A | T | . | PASS | MYCBP   | intrc | NM_ | .       |
| ACa07 | 17 | 53344988 | .         | C | T | . | PASS | HLF     | intrc | NM_ | .       |
| ACa07 | 17 | 56770941 | .         | G | A | . | PASS | RAD51   | intrc | NM_ | .       |
| ACa07 | 17 | 58733825 | rs3677870 | A | G | . | PASS | PPM1D   | intrc | NM_ | .       |
| ACa07 | 17 | 61994969 | .         | G | T | . | PASS | GH1     | intrc | NM_ | .       |
| ACa07 | 17 | 62045564 | rs7637250 | C | T | . | PASS | SCN4A   | exo   | NM_ | synonyr |
| ACa07 | 17 | 62796399 | .         | C | A | . | PASS | PLEKH   | ncR   | NR_ | .       |
| ACa07 | 17 | 65141955 | .         | C | T | . | PASS | HELZ    | exo   | NM_ | synonyr |
| ACa07 | 17 | 67133640 | .         | T | C | . | PASS | ABCA6   | exo   | NM_ | missens |
| ACa07 | 17 | 72206149 | .         | C | T | . | PASS | MGC16   | ncR   | NR_ | .       |
| ACa07 | 17 | 72352246 | .         | C | T | . | PASS | .       | dow   | NM_ | .       |
| ACa07 | 17 | 72859354 | rs5610655 | C | T | . | PASS | FDXR    | exo   | NM_ | missens |
| ACa07 | 17 | 73486703 | rs1018051 | G | C | . | PASS | KIAA01  | intrc | NM_ | .       |
| ACa07 | 17 | 73501559 | rs3777274 | G | A | . | PASS | CASKIN  | intrc | NM_ | .       |
| ACa07 | 17 | 73503825 | .         | C | T | . | PASS | CASKIN  | intrc | NM_ | .       |
| ACa07 | 17 | 73611950 | .         | G | T | . | PASS | MYO15   | ncR   | NR_ | .       |
| ACa07 | 17 | 73624543 | .         | G | T | . | PASS | RECQL   | intrc | NM_ | .       |

|       |    |          |           |   |   |   |      |        |        |        |          |
|-------|----|----------|-----------|---|---|---|------|--------|--------|--------|----------|
| ACa07 | 17 | 73625597 | .         | G | C | . | PASS | RECQL1 | intrc  | NM_    | .        |
| ACa07 | 17 | 74527640 | rs3697050 | C | T | . | PASS | CYGB   | exo    | NM_    | missens  |
| ACa07 | 17 | 74559126 | .         | A | G | . | PASS | SNHG1  | ncR    | NR_    | .        |
| ACa07 | 17 | 74899523 | .         | C | A | . | PASS | MGAT5  | intrc  | NM_    | .        |
| ACa07 | 17 | 75191119 | rs7670774 | G | A | . | PASS | SEC14L | intrc  | NM_    | .        |
| ACa07 | 17 | 76454501 | .         | C | A | . | PASS | DNAH1  | intrc  | NM_    | .        |
| ACa07 | 17 | 76499024 | rs7521502 | C | T | . | PASS | DNAH1  | exo    | NM_    | missens  |
| ACa07 | 17 | 77100166 | .         | G | A | . | PASS | RBFOX1 | exo    | NM_    | missens  |
| ACa07 | 17 | 77808213 | .         | G | A | . | PASS | CBX4   | exo    | NM_    | missens  |
| ACa07 | 17 | 78032382 | rs5354610 | G | A | . | PASS | CCDC4  | exo    | NM_    | missens  |
| ACa07 | 17 | 78156663 | rs7737952 | G | A | . | PASS | CARD1  | intrc  | NM_    | .        |
| ACa07 | 17 | 78179400 | rs3676544 | C | T | . | PASS | CARD1  | exo    | NM_    | synonym  |
| ACa07 | 17 | 78324327 | .         | G | A | . | PASS | RNF213 | intrc  | NM_    | .        |
| ACa07 | 17 | 78937995 | .         | G | A | . | PASS | RPTOR  | intrc  | NM_    | .        |
| ACa07 | 17 | 79027499 | .         | G | A | . | PASS | BAIAP2 | exo    | NM_    | missens  |
| ACa07 | 17 | 79180303 | .         | C | A | . | PASS | CEP131 | intrc  | NM_    | .        |
| ACa07 | 17 | 79279159 | rs3678800 | C | T | . | PASS | LINC00 | ncR    | NR_    | .        |
| ACa07 | 17 | 79390607 | .         | G | A | . | PASS | BAHCC  | intrc  | NM_    | .        |
| ACa07 | 17 | 79632417 | .         | C | T | . | PASS | OXLD1  | exo    | NM_    | synonym  |
| ACa07 | 17 | 79916537 | .         | C | A | . | PASS | NOTUM  | intrc  | NM_    | .        |
| ACa07 | 17 | 79974405 | .         | T | C | . | PASS | ASPSCI | splice | NM_NM  | .        |
| ACa07 | 17 | 80041663 | .         | G | A | . | PASS | FASN   | exo    | NM_    | missens  |
| ACa07 | 17 | 80047200 | rs7594547 | G | A | . | PASS | FASN   | exo    | NM_    | missens  |
| ACa07 | 17 | 80085557 | .         | C | T | . | PASS | CCDC5  | intrc  | NM_    | .        |
| ACa07 | 17 | 80575231 | rs1452537 | G | A | . | PASS | WDR45  | exo    | NM_    | synonym  |
| ACa07 | 17 | 80789716 | .         | G | A | . | PASS | ZNF750 | exo    | NM_    | synonym  |
| ACa07 | 18 | 909466   | .         | G | A | . | PASS | ADCYA1 | exo    | NM_    | missens  |
| ACa07 | 18 | 2578185  | .         | A | G | . | PASS | NDC80  | intrc  | NM_    | .        |
| ACa07 | 18 | 12353187 | .         | A | G | . | PASS | AFG3L2 | intrc  | NM_    | .        |
| ACa07 | 18 | 13024458 | .         | G | A | . | PASS | CEP192 | intrc  | NM_    | .        |
| ACa07 | 18 | 13885013 | .         | A | T | . | PASS | MC2R   | exo    | NM_    | missens  |
| ACa07 | 18 | 14890007 | .         | C | A | . | PASS | .      | inte   | NM_dis | .        |
| ACa07 | 18 | 15004074 | .         | G | A | . | PASS | .      | inte   | NR_dis | .        |
| ACa07 | 18 | 19093947 | .         | G | T | . | PASS | GREB1  | exo    | NM_    | missens  |
| ACa07 | 18 | 19115949 | rs1390032 | C | T | . | PASS | ESCO1  | intrc  | NM_    | .        |
| ACa07 | 18 | 20948481 | .         | G | T | . | PASS | TMEM2  | intrc  | NM_    | .        |
| ACa07 | 18 | 21402267 | rs5453420 | C | T | . | PASS | LAMA3  | exo    | NM_    | missens  |
| ACa07 | 18 | 29847791 | rs7793765 | C | T | . | PASS | GAREM  | UTF    | NM_NM  | .        |
| ACa07 | 18 | 33719560 | .         | A | G | . | PASS | ELP2   | exo    | NM_    | synonym  |
| ACa07 | 18 | 43495988 | .         | A | G | . | PASS | EPG5   | exo    | NM_    | missens  |
| ACa07 | 18 | 44656708 | rs7789211 | G | A | . | PASS | HDHD2  | intrc  | NM_    | .        |
| ACa07 | 18 | 44656742 | .         | A | G | . | PASS | HDHD2  | intrc  | NM_    | .        |
| ACa07 | 18 | 47421391 | rs7710491 | G | A | . | PASS | MYO5B  | exo    | NM_    | missens  |
| ACa07 | 18 | 47778202 | .         | C | T | . | PASS | CFAP5  | intrc  | NM_    | .        |
| ACa07 | 18 | 57677257 | .         | G | A | . | PASS | .      | inte   | NM_dis | .        |
| ACa07 | 18 | 60225951 | .         | G | T | . | PASS | ZCCHC  | exo    | NM_    | missens  |
| ACa07 | 18 | 61234143 | rs1417032 | C | T | . | PASS | SERPIN | exo    | NM_    | stopgain |
| ACa07 | 18 | 61309094 | .         | T | C | . | PASS | SERPIN | exo    | NM_    | missens  |
| ACa07 | 18 | 67871371 | .         | A | G | . | PASS | RTTN   | exo    | NM_    | synonym  |
| ACa07 | 18 | 72346490 | .         | C | A | . | PASS | ZNF407 | exo    | NM_    | missens  |
| ACa07 | 18 | 77067295 | .         | G | T | . | PASS | ATP9B  | intrc  | NM_    | .        |
| ACa07 | 19 | 312348   | rs1020066 | C | T | . | PASS | MIER2  | intrc  | NM_    | .        |
| ACa07 | 19 | 572542   | .         | C | T | . | PASS | BSG    | UTF    | NM_NM  | .        |
| ACa07 | 19 | 619791   | rs3749392 | C | T | . | PASS | POLRM  | intrc  | NM_    | .        |

|       |    |          |           |   |   |   |      |         |       |     |          |
|-------|----|----------|-----------|---|---|---|------|---------|-------|-----|----------|
| ACa07 | 19 | 629937   | rs7789396 | G | A | . | PASS | POLRM   | exon  | NM_ | missens  |
| ACa07 | 19 | 736057   | .         | G | A | . | PASS | PALM    | exon  | NM_ | missens  |
| ACa07 | 19 | 805209   | rs3777310 | C | T | . | PASS | PTBP1   | intrc | NM_ | .        |
| ACa07 | 19 | 1012501  | .         | G | T | . | PASS | TMEM2   | exon  | NM_ | missens  |
| ACa07 | 19 | 1079821  | rs9456811 | C | T | . | PASS | HMHA1   | exon  | NM_ | synonyr  |
| ACa07 | 19 | 1091690  | .         | C | T | . | PASS | POLR2f  | intrc | NM_ | .        |
| ACa07 | 19 | 1105690  | rs7620114 | G | A | . | PASS | GPX4    | exon  | NM_ | unknow   |
| ACa07 | 19 | 1109709  | rs2022226 | C | T | . | PASS | SBNO2   | exon  | NM_ | synonyr  |
| ACa07 | 19 | 1112702  | .         | C | T | . | PASS | SBNO2   | intrc | NM_ | .        |
| ACa07 | 19 | 1122606  | rs7799382 | G | A | . | PASS | SBNO2   | intrc | NM_ | .        |
| ACa07 | 19 | 1149369  | .         | G | A | . | PASS | SBNO2   | exon  | NM_ | missens  |
| ACa07 | 19 | 1255409  | .         | C | A | . | PASS | MIDN    | intrc | NM_ | .        |
| ACa07 | 19 | 1271445  | rs3753640 | C | T | . | PASS | CIRBP   | exon  | NM_ | missens  |
| ACa07 | 19 | 1407859  | .         | G | A | . | PASS | DAZAP   | intrc | NM_ | .        |
| ACa07 | 19 | 1434018  | .         | G | A | . | PASS | DAZAP   | intrc | NM_ | .        |
| ACa07 | 19 | 1531834  | rs1007918 | C | T | . | PASS | PLK5    | exon  | NM_ | synonyr  |
| ACa07 | 19 | 2211189  | rs3694032 | G | A | . | PASS | DOT1L   | exon  | NM_ | synonyr  |
| ACa07 | 19 | 2341270  | rs7522031 | G | A | . | PASS | SPPL2E  | intrc | NM_ | .        |
| ACa07 | 19 | 2757710  | .         | G | T | . | PASS | SGTA    | exon  | NM_ | missens  |
| ACa07 | 19 | 2767039  | .         | C | A | . | PASS | SGTA    | intrc | NM_ | .        |
| ACa07 | 19 | 3179096  | rs3763485 | C | T | . | PASS | S1PR4   | exon  | NM_ | synonyr  |
| ACa07 | 19 | 3457098  | rs7773785 | C | T | . | PASS | NFIC    | intrc | NM_ | .        |
| ACa07 | 19 | 3816988  | .         | G | A | . | PASS | ZFR2    | intrc | NM_ | .        |
| ACa07 | 19 | 4210478  | .         | C | T | . | PASS | ANKRD   | intrc | NM_ | .        |
| ACa07 | 19 | 4217198  | rs7591374 | G | A | . | PASS | ANKRD   | exon  | NM_ | missens  |
| ACa07 | 19 | 4362368  | .         | G | A | . | PASS | SH3GL   | exon  | NM_ | stopgair |
| ACa07 | 19 | 4538218  | rs1503658 | G | A | . | PASS | LRG1    | exon  | NM_ | missens  |
| ACa07 | 19 | 4544276  | .         | G | A | . | PASS | SEMA6l  | exon  | NM_ | synonyr  |
| ACa07 | 19 | 5039983  | .         | T | C | . | PASS | KDM4B   | exon  | NM_ | missens  |
| ACa07 | 19 | 5641967  | .         | C | T | . | PASS | SAFB    | intrc | NM_ | .        |
| ACa07 | 19 | 5785310  | rs1018214 | G | A | . | PASS | DUS3L   | intrc | NM_ | .        |
| ACa07 | 19 | 6477127  | rs7632840 | G | A | . | PASS | DENND   | exon  | NM_ | unknow   |
| ACa07 | 19 | 6826394  | .         | T | C | . | PASS | VAV1    | intrc | NM_ | .        |
| ACa07 | 19 | 7527157  | rs1390681 | C | T | . | PASS | ARHGE   | exon  | NM_ | missens  |
| ACa07 | 19 | 7607845  | rs3770694 | C | T | . | PASS | PNPLA   | intrc | NM_ | .        |
| ACa07 | 19 | 7687484  | rs3745730 | G | A | . | PASS | XAB2    | exon  | NM_ | missens  |
| ACa07 | 19 | 7688095  | rs7516930 | C | T | . | PASS | XAB2    | exon  | NM_ | synonyr  |
| ACa07 | 19 | 7704641  | rs1417170 | G | A | . | PASS | STXBP2  | exon  | NM_ | missens  |
| ACa07 | 19 | 7806726  | .         | G | T | . | PASS | CD209   | UTF   | NM_ | NM_      |
| ACa07 | 19 | 7808878  | .         | C | A | . | PASS | CD209   | intrc | NM_ | .        |
| ACa07 | 19 | 7920858  | rs7595385 | C | T | . | PASS | EVI5L   | intrc | NM_ | .        |
| ACa07 | 19 | 8201121  | rs3527749 | C | T | . | PASS | FBN3    | exon  | NM_ | missens  |
| ACa07 | 19 | 8367325  | rs7615602 | C | T | . | PASS | CD320   | UTF   | NM_ | NM_      |
| ACa07 | 19 | 8503622  | rs5308100 | T | G | . | PASS | 2-Mar   | UTF   | NM_ | NM_      |
| ACa07 | 19 | 8808742  | .         | C | T | . | PASS | ACTL9   | exon  | NM_ | missens  |
| ACa07 | 19 | 8893064  | rs3694972 | C | T | . | PASS | .       | inte  | NM_ | dis.     |
| ACa07 | 19 | 8893178  | rs3751712 | C | G | . | PASS | .       | inte  | NM_ | dis.     |
| ACa07 | 19 | 9014701  | rs5686926 | G | A | . | PASS | MUC16   | exon  | NM_ | synonyr  |
| ACa07 | 19 | 9063844  | rs7801357 | C | T | . | PASS | MUC16   | exon  | NM_ | missens  |
| ACa07 | 19 | 9064124  | .         | C | T | . | PASS | MUC16   | exon  | NM_ | synonyr  |
| ACa07 | 19 | 9922558  | .         | A | G | . | PASS | FBXL12  | intrc | NM_ | .        |
| ACa07 | 19 | 9949144  | rs7564749 | G | A | . | PASS | PIN1    | exon  | NM_ | missens  |
| ACa07 | 19 | 9965347  | rs7814402 | G | A | . | PASS | OLFM2   | exon  | NM_ | missens  |
| ACa07 | 19 | 10201938 | .         | C | T | . | PASS | C19orf6 | exon  | NM_ | missens  |



|       |    |          |           |   |   |   |      |        |       |        |         |
|-------|----|----------|-----------|---|---|---|------|--------|-------|--------|---------|
| ACa07 | 19 | 10218498 | .         | G | A | . | PASS | PPAN-F | exon  | NM_    | missens |
| ACa07 | 19 | 10225883 | .         | G | A | . | PASS | P2RY11 | UTF   | NM_NM  | .       |
| ACa07 | 19 | 10394233 | .         | G | T | . | PASS | ICAM1  | exon  | NM_    | missens |
| ACa07 | 19 | 10405808 | .         | G | A | . | PASS | ICAM5  | intrc | NM_    | .       |
| ACa07 | 19 | 10475409 | rs1383503 | G | A | . | PASS | TYK2   | exon  | NM_    | synonyr |
| ACa07 | 19 | 10577703 | rs2009930 | G | A | . | PASS | PDE4A  | exon  | NM_    | synonyr |
| ACa07 | 19 | 10662385 | .         | A | G | . | PASS | ATG4D  | intrc | NM_    | .       |
| ACa07 | 19 | 10676669 | .         | C | T | . | PASS | KRI1   | exon  | NM_    | missens |
| ACa07 | 19 | 11224018 | rs7634492 | C | T | . | PASS | LDLR   | exon  | NM_    | synonyr |
| ACa07 | 19 | 11240383 | rs3737274 | G | A | . | PASS | LDLR   | intrc | NM_    | .       |
| ACa07 | 19 | 11348936 | rs3721772 | C | T | . | PASS | DOCK6  | exon  | NM_    | missens |
| ACa07 | 19 | 11541352 | .         | A | G | . | PASS | CCDC1  | intrc | NM_    | .       |
| ACa07 | 19 | 11660011 | rs5385135 | A | T | . | PASS | CNN1   | intrc | NM_    | .       |
| ACa07 | 19 | 12766435 | .         | G | T | . | PASS | MAN2B  | intrc | NM_    | .       |
| ACa07 | 19 | 13084339 | rs3710318 | G | A | . | PASS | DAND5  | exon  | NM_    | missens |
| ACa07 | 19 | 14076450 | .         | G | A | . | PASS | RFX1   | exon  | NM_    | missens |
| ACa07 | 19 | 14208252 | .         | A | C | . | PASS | PRKAC  | exon  | NM_    | missens |
| ACa07 | 19 | 15540664 | .         | C | G | . | PASS | WIZ    | intrc | NM_    | .       |
| ACa07 | 19 | 15839060 | .         | C | T | . | PASS | OR10H  | exon  | NM_    | synonyr |
| ACa07 | 19 | 16437736 | .         | G | A | . | PASS | KLF2   | exon  | NM_    | missens |
| ACa07 | 19 | 16495865 | rs1015670 | G | A | . | PASS | EPS15L | intrc | NM_    | .       |
| ACa07 | 19 | 17108172 | .         | C | T | . | PASS | CPAMD  | intrc | NM_    | .       |
| ACa07 | 19 | 17278658 | rs1138422 | G | A | . | PASS | MYO9B  | intrc | NM_    | .       |
| ACa07 | 19 | 17338512 | .         | T | C | . | PASS | OCEL1  | intrc | NM_    | .       |
| ACa07 | 19 | 17366376 | rs9290443 | G | A | . | PASS | USHBP  | exon  | NM_    | missens |
| ACa07 | 19 | 17452078 | rs7698270 | G | A | . | PASS | GTPBP  | exon  | NM_    | synonyr |
| ACa07 | 19 | 17767088 | rs1043222 | C | T | . | PASS | UNC13  | exon  | NM_    | missens |
| ACa07 | 19 | 17783446 | .         | T | C | . | PASS | UNC13  | intrc | NM_    | .       |
| ACa07 | 19 | 18258237 | .         | G | T | . | PASS | MAST3  | intrc | NM_    | .       |
| ACa07 | 19 | 18333024 | .         | C | T | . | PASS | PDE4C  | exon  | NM_    | missens |
| ACa07 | 19 | 18967718 | rs3719294 | C | T | . | PASS | UPF1   | exon  | NM_    | synonyr |
| ACa07 | 19 | 19452210 | rs2012753 | C | T | . | PASS | MAU2   | exon  | NM_    | synonyr |
| ACa07 | 19 | 20229551 | .         | C | A | . | PASS | ZNF90  | exon  | NM_    | synonyr |
| ACa07 | 19 | 21838755 | .         | T | C | . | PASS | .      | inte  | NM_dis | .       |
| ACa07 | 19 | 22836286 | .         | T | C | . | PASS | ZNF492 | intrc | NM_    | .       |
| ACa07 | 19 | 30164554 | .         | C | T | . | PASS | PLEKHf | intrc | NM_    | .       |
| ACa07 | 19 | 31767776 | rs7540203 | C | T | . | PASS | TSHZ3  | exon  | NM_    | missens |
| ACa07 | 19 | 34811007 | rs3754283 | C | T | . | PASS | KIAA03 | exon  | NM_    | missens |
| ACa07 | 19 | 34868527 | .         | C | G | . | PASS | GPI    | intrc | NM_    | .       |
| ACa07 | 19 | 35836331 | .         | A | C | . | PASS | CD22   | intrc | NM_    | .       |
| ACa07 | 19 | 36124878 | rs7656023 | G | A | . | PASS | RBM42  | exon  | NM_    | missens |
| ACa07 | 19 | 36581331 | .         | G | A | . | PASS | WDR62  | intrc | NM_    | .       |
| ACa07 | 19 | 36727209 | .         | T | C | . | PASS | ZNF146 | UTF   | NM_NM  | .       |
| ACa07 | 19 | 37037627 | rs5581240 | C | T | . | PASS | ZNF529 | UTF   | NM_NM  | .       |
| ACa07 | 19 | 37780303 | .         | C | T | . | PASS | .      | inte  | NR_dis | .       |
| ACa07 | 19 | 37784554 | rs4806419 | C | A | . | PASS | .      | inte  | NR_dis | .       |
| ACa07 | 19 | 37785301 | rs7125437 | C | G | . | PASS | .      | inte  | NR_dis | .       |
| ACa07 | 19 | 37785451 | .         | C | T | . | PASS | .      | inte  | NR_dis | .       |
| ACa07 | 19 | 38375409 | rs7728313 | G | A | . | PASS | .      | dow   | NM_    | .       |
| ACa07 | 19 | 38684347 | .         | G | T | . | PASS | SIPA1L | exon  | NM_    | unknow  |
| ACa07 | 19 | 38861397 | rs1476199 | C | T | . | PASS | CATSP  | exon  | NM_    | missens |
| ACa07 | 19 | 38904308 | .         | C | T | . | PASS | RASGR  | intrc | NM_    | .       |
| ACa07 | 19 | 39003154 | rs3756003 | G | A | . | PASS | RYR1   | intrc | NM_    | .       |
| ACa07 | 19 | 39051696 | rs5371432 | A | G | . | PASS | RYR1   | intrc | NM_    | .       |

|       |    |          |           |   |   |   |      |         |       |        |          |   |
|-------|----|----------|-----------|---|---|---|------|---------|-------|--------|----------|---|
| ACa07 | 19 | 39098907 | .         | G | A | . | PASS | MAP4K   | intrc | NM_    | .        | . |
| ACa07 | 19 | 39329428 | .         | C | A | . | PASS | HNRNP   | intrc | NM_    | .        | . |
| ACa07 | 19 | 39381353 | rs5721273 | A | G | . | PASS | SIRT2   | intrc | NM_    | .        | . |
| ACa07 | 19 | 39739143 | rs8917290 | G | A | . | PASS | IFNL4   | exo   | NM_    | unknow   |   |
| ACa07 | 19 | 40025388 | .         | T | C | . | PASS | .       | inte  | NM_dis | .        | . |
| ACa07 | 19 | 40221984 | rs7564368 | G | A | . | PASS | CLC     | UTF   | NM_NM  | .        | . |
| ACa07 | 19 | 40316434 | rs7738579 | G | A | . | PASS | DYRK1f  | exo   | NM_    | unknow   |   |
| ACa07 | 19 | 40376264 | .         | G | A | . | PASS | FCGBP   | intrc | NM_    | .        | . |
| ACa07 | 19 | 41083493 | rs7469641 | G | A | . | PASS | SHKBP   | exo   | NM_    | missens  |   |
| ACa07 | 19 | 41083673 | .         | C | T | . | PASS | SHKBP   | intrc | NM_    | .        | . |
| ACa07 | 19 | 41099064 | .         | G | A | . | PASS | .       | ups   | NM_    | .        | . |
| ACa07 | 19 | 41119079 | .         | C | T | . | PASS | LTBP4   | exo   | NM_    | unknow   |   |
| ACa07 | 19 | 41119905 | .         | C | T | . | PASS | LTBP4   | exo   | NM_    | unknow   |   |
| ACa07 | 19 | 41193028 | .         | C | A | . | PASS | NUMBL   | intrc | NM_    | .        | . |
| ACa07 | 19 | 41255546 | rs1045293 | G | C | . | PASS | C19orf5 | exo   | NM_    | missens  |   |
| ACa07 | 19 | 41808836 | .         | G | T | . | PASS | HNRNP   | exo   | NM_    | unknow   |   |
| ACa07 | 19 | 41854288 | .         | G | T | . | PASS | TGFB1   | exo   | NM_    | missens  |   |
| ACa07 | 19 | 42398329 | .         | C | T | . | PASS | ARHGE   | exo   | NM_    | missens  |   |
| ACa07 | 19 | 42880770 | .         | C | A | . | PASS | MEGF8   | exo   | NM_    | missens  |   |
| ACa07 | 19 | 43097765 | .         | C | A | . | PASS | CEACA   | exo   | NM_    | stopgair |   |
| ACa07 | 19 | 43244381 | .         | T | C | . | PASS | PSG3    | intrc | NM_    | .        | . |
| ACa07 | 19 | 43290727 | .         | C | T | . | PASS | .       | inte  | NM_dis | .        | . |
| ACa07 | 19 | 44096856 | .         | G | A | . | PASS | IRGQ    | exo   | NM_    | synonyr  |   |
| ACa07 | 19 | 44492772 | .         | T | G | . | PASS | ZNF155  | intrc | NM_    | .        | . |
| ACa07 | 19 | 44892038 | .         | G | T | . | PASS | ZNF285  | exo   | NM_    | missens  |   |
| ACa07 | 19 | 44932620 | rs7737032 | C | T | . | PASS | ZNF229  | exo   | NM_    | unknow   |   |
| ACa07 | 19 | 45121644 | rs9075637 | C | T | . | PASS | IGSF23  | intrc | NM_    | .        | . |
| ACa07 | 19 | 45183512 | .         | C | T | . | PASS | CEACA   | intrc | NM_    | .        | . |
| ACa07 | 19 | 45207659 | rs5632226 | C | T | . | PASS | CEACA   | intrc | NM_    | .        | . |
| ACa07 | 19 | 45254635 | .         | C | T | . | PASS | BCL3    | exo   | NM_    | synonyr  |   |
| ACa07 | 19 | 45315761 | .         | C | A | . | PASS | BCAM    | exo   | NM_    | missens  |   |
| ACa07 | 19 | 45395763 | .         | T | C | . | PASS | TOMM4   | intrc | NM_    | .        | . |
| ACa07 | 19 | 46094263 | .         | G | T | . | PASS | GPR4    | exo   | NM_    | missens  |   |
| ACa07 | 19 | 47207795 | rs1026645 | C | T | . | PASS | PRKD2   | exo   | NM_    | missens  |   |
| ACa07 | 19 | 47236438 | rs3697415 | C | T | . | PASS | STRN4   | exo   | NM_    | missens  |   |
| ACa07 | 19 | 47940535 | .         | G | A | . | PASS | SLC8A2  | intrc | NM_    | .        | . |
| ACa07 | 19 | 48325475 | .         | G | A | . | PASS | CRX     | intrc | NM_    | .        | . |
| ACa07 | 19 | 48364154 | .         | C | T | . | PASS | .       | inte  | NM_dis | .        | . |
| ACa07 | 19 | 48423499 | rs6213000 | C | G | . | PASS | .       | inte  | NR_dis | .        | . |
| ACa07 | 19 | 49132107 | .         | G | A | . | PASS | SPHK2   | exo   | NM_    | missens  |   |
| ACa07 | 19 | 49355406 | rs1012379 | G | A | . | PASS | PLEKH7  | intrc | NM_    | .        | . |
| ACa07 | 19 | 49601618 | .         | G | A | . | PASS | SNRNP   | intrc | NM_    | .        | . |
| ACa07 | 19 | 49605507 | .         | A | G | . | PASS | SNRNP   | intrc | NM_    | .        | . |
| ACa07 | 19 | 49867782 | rs5626072 | C | T | . | PASS | DKKL1   | intrc | NM_    | .        | . |
| ACa07 | 19 | 49918087 | .         | C | T | . | PASS | CCDC1f  | intrc | NM_    | .        | . |
| ACa07 | 19 | 50046324 | .         | G | T | . | PASS | RCN3    | intrc | NM_    | .        | . |
| ACa07 | 19 | 50208142 | rs7508901 | C | T | . | PASS | CPT1C   | intrc | NM_    | .        | . |
| ACa07 | 19 | 50775820 | rs3749564 | G | A | . | PASS | MYH14   | exo   | NM_    | missens  |   |
| ACa07 | 19 | 50880852 | rs2001122 | G | A | . | PASS | NR1H2   | UTF   | NM_NM  | .        | . |
| ACa07 | 19 | 50910470 | .         | G | A | . | PASS | POLD1   | intrc | NM_    | .        | . |
| ACa07 | 19 | 50915997 | rs5643823 | T | G | . | PASS | POLD1   | intrc | NM_    | .        | . |
| ACa07 | 19 | 50920365 | rs3695357 | C | T | . | PASS | POLD1   | intrc | NM_    | .        | . |
| ACa07 | 19 | 50922148 | .         | G | A | . | PASS | .       | ups   | NM_    | .        | . |
| ACa07 | 19 | 50944153 | rs7738602 | G | A | . | PASS | MYBPC   | exo   | NM_    | missens  |   |

|       |    |          |           |   |   |   |      |         |        |        |          |
|-------|----|----------|-----------|---|---|---|------|---------|--------|--------|----------|
| ACa07 | 19 | 50969451 | .         | G | A | . | PASS | MYBPC   | splice | NM_NM  | .        |
| ACa07 | 19 | 51273989 | .         | A | G | . | PASS | GPR32   | exon   | NM     | synonym  |
| ACa07 | 19 | 53453763 | .         | T | C | . | PASS | ZNF816  | exon   | NM     | missense |
| ACa07 | 19 | 53553611 | .         | A | G | . | PASS | ERVV-2  | exon   | NM     | synonym  |
| ACa07 | 19 | 53770304 | rs1420234 | T | G | . | PASS | VN1R4   | exon   | NM     | synonym  |
| ACa07 | 19 | 54257306 | .         | G | A | . | PASS | MIR527  | ncR    | NR     | .        |
| ACa07 | 19 | 54483198 | .         | T | G | . | PASS | CACNG   | exon   | NM     | missense |
| ACa07 | 19 | 54634642 | .         | T | C | . | PASS | PRPF31  | intron | NM     | .        |
| ACa07 | 19 | 54660450 | .         | G | A | . | PASS | LENG1   | intron | NM     | .        |
| ACa07 | 19 | 54745439 | rs3704562 | G | A | . | PASS | LILRA6, | intron | NM     | .        |
| ACa07 | 19 | 54941633 | .         | C | A | . | PASS | TTYH1   | intron | NM     | .        |
| ACa07 | 19 | 55045145 | rs7529171 | G | A | . | PASS | KIR3DX  | ncR    | NR     | .        |
| ACa07 | 19 | 55685191 | .         | G | T | . | PASS | SYT5    | intron | NM     | .        |
| ACa07 | 19 | 55889387 | rs3707427 | C | T | . | PASS | TMEM1   | exon   | NM     | missense |
| ACa07 | 19 | 56424219 | rs2000514 | G | A | . | PASS | NLRP13  | exon   | NM     | missense |
| ACa07 | 19 | 57327563 | rs7704358 | C | T | . | PASS | PEG3    | exon   | NM     | synonym  |
| ACa07 | 19 | 58011532 | .         | G | A | . | PASS | ZNF773  | intron | NM     | .        |
| ACa07 | 19 | 58099851 | .         | G | A | . | PASS | ZIK1    | intron | NM     | .        |
| ACa07 | 19 | 58499615 | rs1474253 | C | T | . | PASS | ZNF606  | exon   | NM     | synonym  |
| ACa07 | 19 | 58571417 | .         | C | T | . | PASS | ZNF135  | UTF    | NM_NM  | .        |
| ACa07 | 19 | 58858404 | rs3733248 | C | T | . | PASS | A1BG    | intron | NM     | .        |
| ACa07 | 20 | 1903097  | rs1021538 | C | T | . | PASS | SIRPA   | exon   | NM     | missense |
| ACa07 | 20 | 2413101  | rs7627114 | T | C | . | PASS | TGM6    | intron | NM     | .        |
| ACa07 | 20 | 2635601  | .         | G | A | . | PASS | NOP56   | intron | NM     | .        |
| ACa07 | 20 | 3245239  | rs8672082 | C | T | . | PASS | C20orf1 | intron | NM     | .        |
| ACa07 | 20 | 3642095  | .         | C | T | . | PASS | GFRA4   | intron | NM     | .        |
| ACa07 | 20 | 3651693  | rs7638624 | G | A | . | PASS | ADAM3   | exon   | NM     | stopgain |
| ACa07 | 20 | 4705860  | .         | C | T | . | PASS | PRND    | UTF    | NM_NM  | .        |
| ACa07 | 20 | 11009666 | rs1032256 | G | A | . | PASS | .       | intron | NR_dis | .        |
| ACa07 | 20 | 16385687 | .         | T | C | . | PASS | KIF16B  | intron | NM     | .        |
| ACa07 | 20 | 18139741 | .         | A | G | . | PASS | CSRP2   | exon   | NM     | missense |
| ACa07 | 20 | 18362090 | .         | T | C | . | PASS | LINC00  | ncR    | NR     | .        |
| ACa07 | 20 | 23669411 | rs1509219 | G | A | . | PASS | CST4    | exon   | NM     | missense |
| ACa07 | 20 | 25289014 | .         | T | C | . | PASS | ABHD12  | intron | NM     | .        |
| ACa07 | 20 | 25745477 | .         | C | T | . | PASS | FAM182  | ncR    | NR     | .        |
| ACa07 | 20 | 29612803 | .         | C | T | . | PASS | FRG1B   | ncR    | NR     | .        |
| ACa07 | 20 | 29612810 | .         | G | A | . | PASS | FRG1B   | ncR    | NR     | .        |
| ACa07 | 20 | 31043958 | rs1845841 | C | T | . | PASS | NOL4L   | exon   | NM     | missense |
| ACa07 | 20 | 31654608 | .         | C | A | . | PASS | BPIFB3  | intron | NM     | .        |
| ACa07 | 20 | 32354938 | .         | G | T | . | PASS | ZNF341  | intron | NM     | .        |
| ACa07 | 20 | 33247126 | .         | G | A | . | PASS | PIGU    | intron | NM     | .        |
| ACa07 | 20 | 33657227 | rs7460506 | A | T | . | PASS | TRPC4   | intron | NM     | .        |
| ACa07 | 20 | 34099484 | .         | A | C | . | PASS | CEP25C  | UTF    | NM_NM  | .        |
| ACa07 | 20 | 34263091 | rs1480471 | C | T | . | PASS | NFS1    | exon   | NM     | missense |
| ACa07 | 20 | 34329931 | rs5431099 | T | C | . | PASS | RBM39   | UTF    | NM_NM  | .        |
| ACa07 | 20 | 34806760 | .         | G | A | . | PASS | EPB41L  | intron | NM     | .        |
| ACa07 | 20 | 35064896 | .         | G | A | . | PASS | DLGAP2  | intron | NM     | .        |
| ACa07 | 20 | 35374485 | rs8798536 | G | A | . | PASS | NDRG3   | UTF    | NM_NM  | .        |
| ACa07 | 20 | 35736905 | .         | G | T | . | PASS | MROH8   | intron | NM     | .        |
| ACa07 | 20 | 36718044 | rs9848856 | C | T | . | PASS | RPRD11  | intron | NM     | .        |
| ACa07 | 20 | 37591014 | rs9460302 | G | A | . | PASS | DHX35   | exon   | NM     | missense |
| ACa07 | 20 | 37667223 | rs3711048 | G | A | . | PASS | DHX35   | UTF    | NM_NM  | .        |
| ACa07 | 20 | 39713106 | .         | G | A | . | PASS | TOP1    | exon   | NM     | missense |
| ACa07 | 20 | 39794835 | .         | C | T | . | PASS | PLCG1   | exon   | NM     | missense |

|       |    |          |           |   |   |   |      |         |        |         |          |
|-------|----|----------|-----------|---|---|---|------|---------|--------|---------|----------|
| ACa07 | 20 | 41100948 | .         | G | A | . | PASS | PTPRT   | exon   | NM_     | stopgain |
| ACa07 | 20 | 41101120 | rs3761522 | G | A | . | PASS | PTPRT   | exon   | NM_     | synonym  |
| ACa07 | 20 | 43349104 | .         | T | C | . | PASS | WISP2   | intron | NM_     | .        |
| ACa07 | 20 | 43752926 | .         | G | T | . | PASS | WFDC1   | intron | NM_     | .        |
| ACa07 | 20 | 44666942 | .         | C | A | . | PASS | SLC12A  | intron | NM_     | .        |
| ACa07 | 20 | 45004077 | .         | G | T | . | PASS | ELMO2   | intron | NM_     | .        |
| ACa07 | 20 | 45212380 | .         | G | T | . | PASS | SLC13A  | intron | NM_     | .        |
| ACa07 | 20 | 45905430 | .         | C | T | . | PASS | ZMYND   | exon   | NM_     | missense |
| ACa07 | 20 | 49621024 | .         | G | A | . | PASS | KCNG1   | exon   | NM_     | missense |
| ACa07 | 20 | 50234189 | .         | C | T | . | PASS | ATP9A   | intron | NM_     | .        |
| ACa07 | 20 | 50721612 | .         | G | A | . | PASS | ZFP64   | intron | NM_     | .        |
| ACa07 | 20 | 52193647 | rs8891302 | C | T | . | PASS | ZNF217  | exon   | NM_     | synonym  |
| ACa07 | 20 | 52454373 | rs8669651 | T | C | . | PASS | .       | intron | NM_dis  | .        |
| ACa07 | 20 | 57429095 | .         | G | A | . | PASS | GNAS    | exon   | NM_     | missense |
| ACa07 | 20 | 57429831 | .         | C | T | . | PASS | GNAS    | exon   | NM_     | missense |
| ACa07 | 20 | 58486765 | .         | G | A | . | PASS | SYCP2   | intron | NM_     | .        |
| ACa07 | 20 | 60705624 | rs7702464 | C | T | . | PASS | LSM14E  | exon   | NM_     | missense |
| ACa07 | 20 | 61468410 | rs7787907 | C | T | . | PASS | COL9A3  | intron | NM_     | .        |
| ACa07 | 20 | 61468733 | rs1813756 | G | A | . | PASS | COL9A3  | intron | NM_     | .        |
| ACa07 | 20 | 61909505 | rs1435421 | G | A | . | PASS | ARFGAP3 | exon   | NM_     | synonym  |
| ACa07 | 20 | 62153550 | .         | C | T | . | PASS | .       | down   | NM_     | .        |
| ACa07 | 20 | 62174036 | .         | A | G | . | PASS | SRMS    | intron | NM_     | .        |
| ACa07 | 20 | 62493372 | rs5462318 | G | A | . | PASS | ABHD16  | exon   | NM_     | missense |
| ACa07 | 21 | 9755905  | rs7962225 | A | G | . | PASS | .       | intron | NON_dis | .        |
| ACa07 | 21 | 9826731  | .         | C | T | . | PASS | .       | down   | NR_     | .        |
| ACa07 | 21 | 10087796 | .         | G | A | . | PASS | .       | intron | NR_dis  | .        |
| ACa07 | 21 | 10139755 | .         | C | A | . | PASS | .       | intron | NR_dis  | .        |
| ACa07 | 21 | 10535504 | rs8680295 | G | A | . | PASS | .       | intron | NR_dis  | .        |
| ACa07 | 21 | 10535526 | rs3711086 | C | A | . | PASS | .       | intron | NR_dis  | .        |
| ACa07 | 21 | 10614100 | rs3775054 | C | T | . | PASS | .       | intron | NR_dis  | .        |
| ACa07 | 21 | 10969870 | .         | G | A | . | PASS | TPTE    | intron | NM_     | .        |
| ACa07 | 21 | 10970029 | .         | C | A | . | PASS | TPTE    | exon   | NM_     | unknown  |
| ACa07 | 21 | 11058391 | rs5282430 | G | C | . | PASS | BAGE5   | intron | NM_     | .        |
| ACa07 | 21 | 11107313 | .         | C | T | . | PASS | .       | intron | NM_dis  | .        |
| ACa07 | 21 | 11116113 | rs665796  | T | C | . | PASS | .       | intron | NM_dis  | .        |
| ACa07 | 21 | 11116122 | rs6582845 | C | T | . | PASS | .       | intron | NM_dis  | .        |
| ACa07 | 21 | 11181417 | rs915519  | G | C | . | PASS | .       | intron | NM_dis  | .        |
| ACa07 | 21 | 14424309 | .         | C | T | . | PASS | ANKRD   | ncR    | NR_     | .        |
| ACa07 | 21 | 14721665 | .         | T | C | . | PASS | .       | intron | NR_dis  | .        |
| ACa07 | 21 | 22643653 | .         | A | G | . | PASS | NCAM2   | intron | NM_     | .        |
| ACa07 | 21 | 27083858 | .         | C | G | . | PASS | JAM2    | intron | NM_     | .        |
| ACa07 | 21 | 27348250 | .         | A | G | . | PASS | APP     | intron | NM_     | .        |
| ACa07 | 21 | 28792752 | rs9172671 | C | T | . | PASS | MIR500  | ncR    | NR_     | .        |
| ACa07 | 21 | 31720848 | .         | C | T | . | PASS | KRTAP2  | exon   | NM_     | missense |
| ACa07 | 21 | 33330766 | .         | A | G | . | PASS | HUNK    | intron | NM_     | .        |
| ACa07 | 21 | 33340425 | .         | G | T | . | PASS | HUNK    | intron | NM_     | .        |
| ACa07 | 21 | 34017987 | rs1034062 | C | T | . | PASS | SYNJ1   | exon   | NM_     | synonym  |
| ACa07 | 21 | 34443159 | .         | C | T | . | PASS | OLIG1   | exon   | NM_     | synonym  |
| ACa07 | 21 | 34713283 | rs7587939 | A | G | . | PASS | IFNAR1  | intron | NM_     | .        |
| ACa07 | 21 | 35190531 | .         | C | T | . | PASS | ITSN1   | intron | NM_     | .        |
| ACa07 | 21 | 37443165 | .         | T | G | . | PASS | LOC100  | ncR    | NR_     | .        |
| ACa07 | 21 | 38367015 | .         | C | T | . | PASS | .       | intron | NM_dis  | .        |
| ACa07 | 21 | 38470307 | rs5585229 | C | T | . | PASS | TTC3    | intron | NM_     | .        |
| ACa07 | 21 | 40555352 | rs7591033 | G | A | . | PASS | PSMG1   | UTF    | NM_NV   | .        |

|       |    |          |           |   |   |   |      |         |             |         |
|-------|----|----------|-----------|---|---|---|------|---------|-------------|---------|
| ACa07 | 21 | 40627700 | rs7585989 | C | T | . | PASS | BRWD1   | exo NM_     | missens |
| ACa07 | 21 | 41165725 | .         | C | A | . | PASS | IGSF5   | intrc NM_   | .       |
| ACa07 | 21 | 41414479 | .         | C | A | . | PASS | DSCAM   | exo NM_     | synonyr |
| ACa07 | 21 | 41416012 | .         | T | C | . | PASS | DSCAM   | exo NM_     | synonyr |
| ACa07 | 21 | 41452118 | .         | G | A | . | PASS | DSCAM   | exo NM_     | missens |
| ACa07 | 21 | 41710096 | .         | T | C | . | PASS | DSCAM   | exo NM_     | missens |
| ACa07 | 21 | 42716350 | .         | C | T | . | PASS | FAM3B   | intrc NM_   | .       |
| ACa07 | 21 | 43230856 | .         | T | C | . | PASS | PRDM1   | intrc NM_   | .       |
| ACa07 | 21 | 43325674 | rs9464977 | G | A | . | PASS | C2CD2   | intrc NM_   | .       |
| ACa07 | 21 | 43411857 | .         | G | A | . | PASS | ZBTB21  | exo NM_     | missens |
| ACa07 | 21 | 43959597 | .         | T | C | . | PASS | SLC37A  | intrc NM_   | .       |
| ACa07 | 21 | 44514959 | rs1014361 | C | A | . | PASS | U2AF1   | intrc NM_   | .       |
| ACa07 | 21 | 45220931 | rs7806447 | G | A | . | PASS | RRP1    | intrc NM_   | .       |
| ACa07 | 21 | 45547974 | rs5662670 | C | T | . | PASS | PWP2    | exo NM_     | missens |
| ACa07 | 21 | 45856886 | rs9852755 | C | T | . | PASS | TRPM2   | intrc NM_   | .       |
| ACa07 | 21 | 46320365 | rs7565454 | G | A | . | PASS | ITGB2   | exo NM_     | missens |
| ACa07 | 21 | 46935755 | rs7582548 | C | T | . | PASS | SLC19A  | exo NM_     | synonyr |
| ACa07 | 21 | 47409750 | rs3771590 | C | T | . | PASS | COL6A1  | intrc NM_   | .       |
| ACa07 | 21 | 47572651 | .         | G | A | . | PASS | FTCD    | intrc NM_   | .       |
| ACa07 | 21 | 47722647 | .         | G | A | . | PASS | C21orf5 | intrc NM_   | .       |
| ACa07 | 21 | 47817386 | rs7517144 | G | A | . | PASS | PCNT    | exo NM_     | missens |
| ACa07 | 21 | 47965145 | .         | G | A | . | PASS | DIP2A   | exo NM_     | missens |
| ACa07 | 22 | 16229834 | rs2845112 | A | G | . | PASS | .       | inte NR_dis | .       |
| ACa07 | 22 | 16256800 | rs8790424 | C | G | . | PASS | POTEH   | intrc NM_   | .       |
| ACa07 | 22 | 16287159 | .         | A | G | . | PASS | POTEH   | intrc NM_   | .       |
| ACa07 | 22 | 16347994 | rs1248470 | C | A | . | PASS | .       | inte NM_dis | .       |
| ACa07 | 22 | 17445828 | .         | G | A | . | PASS | GAB4    | intrc NM_   | .       |
| ACa07 | 22 | 19028635 | rs5555078 | G | A | . | PASS | DGCR2   | exo NM_     | synonyr |
| ACa07 | 22 | 19109530 | .         | T | A | . | PASS | DGCR2   | intrc NM_   | .       |
| ACa07 | 22 | 20709550 | rs1899538 | G | A | . | PASS | .       | inte NM_dis | .       |
| ACa07 | 22 | 20711723 | .         | C | A | . | PASS | .       | inte NM_dis | .       |
| ACa07 | 22 | 20795769 | .         | G | A | . | PASS | .       | dow NM_     | .       |
| ACa07 | 22 | 21066804 | rs3714923 | G | A | . | PASS | PI4KA   | exo NM_     | synonyr |
| ACa07 | 22 | 21800936 | rs7724279 | G | A | . | PASS | HIC2    | exo NM_     | synonyr |
| ACa07 | 22 | 22681696 | .         | G | A | . | PASS | .       | inte NR_dis | .       |
| ACa07 | 22 | 23264876 | rs3777336 | G | A | . | PASS | .       | inte NM_dis | .       |
| ACa07 | 22 | 24145443 | rs3681295 | C | T | . | PASS | SMARC   | intrc NM_   | .       |
| ACa07 | 22 | 24584287 | .         | G | T | . | PASS | SUSD2   | exo NM_     | missens |
| ACa07 | 22 | 24837284 | .         | C | T | . | PASS | ADORA   | exo NM_     | missens |
| ACa07 | 22 | 24911361 | .         | G | T | . | PASS | UPB1    | intrc NM_   | .       |
| ACa07 | 22 | 25019124 | rs7723316 | G | A | . | PASS | GGT1    | exo NM_     | missens |
| ACa07 | 22 | 25041478 | .         | C | T | . | PASS | POM12   | ncR NR_     | .       |
| ACa07 | 22 | 27282917 | .         | C | T | . | PASS | .       | inte NR_dis | .       |
| ACa07 | 22 | 29628179 | rs1925641 | C | T | . | PASS | EMID1   | intrc NM_   | .       |
| ACa07 | 22 | 30885889 | .         | T | C | . | PASS | SEC14L  | UTF NM_NV   | .       |
| ACa07 | 22 | 31287084 | .         | G | A | . | PASS | OSBP2   | intrc NM_   | .       |
| ACa07 | 22 | 31489439 | rs5710568 | G | A | . | PASS | SMTN    | intrc NM_   | .       |
| ACa07 | 22 | 31685923 | rs1015431 | C | T | . | PASS | PIK3IP1 | intrc NM_   | .       |
| ACa07 | 22 | 32003934 | .         | G | A | . | PASS | SFI1    | exo NM_     | synonyr |
| ACa07 | 22 | 32532909 | .         | T | C | . | PASS | .       | inte NR_dis | .       |
| ACa07 | 22 | 32795806 | .         | T | C | . | PASS | RTCB    | intrc NM_   | .       |
| ACa07 | 22 | 33672966 | .         | G | A | . | PASS | LARGE   | intrc NM_   | .       |
| ACa07 | 22 | 35812391 | rs1379196 | C | T | . | PASS | MCM5    | exo NM_     | synonyr |
| ACa07 | 22 | 36678570 | .         | C | T | . | PASS | MYH9    | UTF NM_NV   | .       |

|       |    |          |           |   |   |   |      |         |              |          |
|-------|----|----------|-----------|---|---|---|------|---------|--------------|----------|
| ACa07 | 22 | 37326821 | rs3682304 | G | A | . | PASS | CSF2Rf  | exo NM_      | missens  |
| ACa07 | 22 | 37400169 | rs5367410 | C | T | . | PASS | TEX33   | intrc NM_    | .        |
| ACa07 | 22 | 38511635 | .         | G | A | . | PASS | PLA2Gf  | exo NM_      | stopgain |
| ACa07 | 22 | 38610282 | .         | C | A | . | PASS | MAFF    | intrc NM_    | .        |
| ACa07 | 22 | 38622889 | rs7523833 | A | G | . | PASS | TMEM1   | intrc NM_    | .        |
| ACa07 | 22 | 38823720 | .         | G | A | . | PASS | KCNJ4   | exo NM_      | missens  |
| ACa07 | 22 | 38824095 | .         | G | A | . | PASS | KCNJ4   | exo NM_      | missens  |
| ACa07 | 22 | 39126505 | rs5714435 | C | T | . | PASS | GTPBP   | intrc NM_    | .        |
| ACa07 | 22 | 39448270 | .         | C | T | . | PASS | APOBE1  | exo NM_      | synonym  |
| ACa07 | 22 | 40053731 | rs3719126 | C | T | . | PASS | CACNA   | intrc NM_    | .        |
| ACa07 | 22 | 40708930 | .         | C | T | . | PASS | TNRC6f  | exo NM_      | missens  |
| ACa07 | 22 | 41075625 | rs2016059 | G | A | . | PASS | MCHR1   | exo NM_      | missens  |
| ACa07 | 22 | 41926891 | .         | C | T | . | PASS | POLR3f  | exo NM_      | missens  |
| ACa07 | 22 | 41928740 | rs1838128 | C | T | . | PASS | POLR3f  | exo NM_      | missens  |
| ACa07 | 22 | 42335257 | .         | C | A | . | PASS | CENPM   | intrc NM_    | .        |
| ACa07 | 22 | 42910976 | .         | G | A | . | PASS | RRP7A   | intrc NM_    | .        |
| ACa07 | 22 | 44178231 | rs1916812 | C | T | . | PASS | EFCABf  | intrc NM_    | .        |
| ACa07 | 22 | 44341889 | .         | G | A | . | PASS | PNPLA3  | intrc NM_    | .        |
| ACa07 | 22 | 45597019 | rs5584935 | C | T | . | PASS | KIAA09f | intrc NM_    | .        |
| ACa07 | 22 | 45724214 | rs1305515 | C | T | . | PASS | FAM11f  | intrc NM_    | .        |
| ACa07 | 22 | 45809290 | .         | C | T | . | PASS | SMC1B   | intrc NM_    | .        |
| ACa07 | 22 | 45931221 | .         | A | G | . | PASS | FBLN1   | splice NM_NV | .        |
| ACa07 | 22 | 46130150 | .         | T | C | . | PASS | ATXN1C  | intrc NM_    | .        |
| ACa07 | 22 | 46657939 | .         | G | A | . | PASS | PKDRE   | exo NM_      | synonym  |
| ACa07 | 22 | 46760606 | .         | G | A | . | PASS | CELSR7  | exo NM_      | missens  |
| ACa07 | 22 | 50436009 | .         | C | A | . | PASS | IL17REL | intrc NM_    | .        |
| ACa07 | 22 | 50553197 | .         | C | A | . | PASS | MOV10l  | intrc NM_    | .        |
| ACa07 | 22 | 50591485 | rs5595729 | G | A | . | PASS | MOV10l  | exo NM_      | synonym  |
| ACa07 | 22 | 50615116 | .         | G | A | . | PASS | PANX2   | intrc NM_    | .        |
| ACa07 | 22 | 50615684 | .         | G | A | . | PASS | PANX2   | exo NM_      | synonym  |
| ACa07 | 22 | 50724661 | rs3705843 | C | T | . | PASS | PLXNB2  | exo NM_      | synonym  |
| ACa07 | 22 | 50876480 | .         | G | A | . | PASS | PPP6R2  | intrc NM_    | .        |
| ACa07 | 22 | 50961677 | .         | C | T | . | PASS | NCAPH   | exo NM_      | missens  |
| ACa07 | 22 | 51048083 | rs9805300 | C | T | . | PASS | MAPK8l  | intrc NM_    | .        |
| ACa07 | X  | 1743038  | .         | A | G | . | PASS | ASMT    | intrc NM_    | .        |
| ACa07 | X  | 2659015  | .         | T | G | . | PASS | CD99    | UTF NM_NV    | .        |
| ACa07 | X  | 2856352  | .         | A | C | . | PASS | ARSE    | intrc NM_    | .        |
| ACa07 | X  | 5810797  | .         | T | C | . | PASS | NLGN4   | UTF NM_NV    | .        |
| ACa07 | X  | 9935829  | .         | T | C | . | PASS | LOC10C  | exo NM_      | synonym  |
| ACa07 | X  | 12737015 | .         | G | T | . | PASS | FRMPD   | intrc NM_    | .        |
| ACa07 | X  | 13607566 | .         | C | T | . | PASS | EGFL6   | intrc NM_    | .        |
| ACa07 | X  | 17750225 | .         | C | T | . | PASS | NHS     | exo NM_      | missens  |
| ACa07 | X  | 21393119 | .         | G | A | . | PASS | CNKSR   | intrc NM_    | .        |
| ACa07 | X  | 23876770 | rs3730298 | C | T | . | PASS | APOO    | exo NM_      | missens  |
| ACa07 | X  | 25031167 | .         | C | T | . | PASS | ARX     | exo NM_      | synonym  |
| ACa07 | X  | 27650692 | .         | T | C | . | PASS | .       | inte NR_dis  | .        |
| ACa07 | X  | 27830696 | .         | C | T | . | PASS | MAGEB   | intrc NM_    | .        |
| ACa07 | X  | 29414654 | .         | T | A | . | PASS | IL1RAPl | intrc NM_    | .        |
| ACa07 | X  | 30268937 | .         | C | A | . | PASS | MAGEB   | exo NM_      | synonym  |
| ACa07 | X  | 30671533 | .         | G | A | . | PASS | GK      | UTF NM_NV    | .        |
| ACa07 | X  | 30714907 | .         | T | C | . | PASS | GK      | intrc NM_    | .        |
| ACa07 | X  | 32659702 | .         | A | C | . | PASS | DMD     | intrc NM_    | .        |
| ACa07 | X  | 35077818 | .         | A | C | . | PASS | .       | inte NM_dis  | .        |
| ACa07 | X  | 38037524 | .         | A | C | . | PASS | SRPX    | intrc NM_    | .        |

|       |   |          |           |   |   |   |      |         |       |     |     |          |
|-------|---|----------|-----------|---|---|---|------|---------|-------|-----|-----|----------|
| ACa07 | X | 40506680 | .         | G | A | . | PASS | CXorf38 | exon  | NM_ | .   | synonym  |
| ACa07 | X | 44169469 | .         | G | A | . | PASS | EFHC2   | intr  | NM_ | .   | .        |
| ACa07 | X | 47663162 | .         | C | T | . | PASS | .       | inte  | NR_ | dis | .        |
| ACa07 | X | 48047195 | .         | G | T | . | PASS | SSX5    | intr  | NM_ | .   | .        |
| ACa07 | X | 48760101 | rs7825839 | C | T | . | PASS | PQBP1   | intr  | NM_ | .   | .        |
| ACa07 | X | 48781133 | rs3679315 | G | A | . | PASS | OTUD5   | exon  | NM_ | .   | missens  |
| ACa07 | X | 48935556 | rs1871040 | C | T | . | PASS | WDR45   | exon  | NM_ | .   | missens  |
| ACa07 | X | 49021149 | .         | G | T | . | PASS | MAGIX   | intr  | NM_ | .   | .        |
| ACa07 | X | 49034293 | .         | G | A | . | PASS | PRICKL  | intr  | NM_ | .   | .        |
| ACa07 | X | 49061747 | rs7822715 | C | T | . | PASS | CACNA   | exon  | NM_ | .   | synonym  |
| ACa07 | X | 49962195 | .         | C | T | . | PASS | AKAP4   | exon  | NM_ | .   | synonym  |
| ACa07 | X | 51638837 | .         | G | A | . | PASS | MAGED   | exon  | NM_ | .   | missens  |
| ACa07 | X | 52632804 | .         | G | A | . | PASS | .       | inte  | NM_ | dis | .        |
| ACa07 | X | 53222424 | rs7825371 | C | T | . | PASS | KDM5C   | exon  | NM_ | .   | missens  |
| ACa07 | X | 53270791 | .         | G | T | . | PASS | IQSEC2  | intr  | NM_ | .   | .        |
| ACa07 | X | 53430792 | .         | A | C | . | PASS | SMC1A   | exon  | NM_ | .   | missens  |
| ACa07 | X | 53575150 | .         | G | T | . | PASS | HUWE1   | exon  | NM_ | .   | missens  |
| ACa07 | X | 54186095 | .         | T | C | . | PASS | FAM12C  | intr  | NM_ | .   | .        |
| ACa07 | X | 54495310 | .         | C | T | . | PASS | FGD1    | splic | NM_ | NM_ | .        |
| ACa07 | X | 54580986 | .         | G | A | . | PASS | GNL3L   | intr  | NM_ | .   | .        |
| ACa07 | X | 54800884 | rs9617788 | A | G | . | PASS | ITIH6   | intr  | NM_ | .   | .        |
| ACa07 | X | 61685261 | .         | T | G | . | PASS | .       | inte  | NOI | dis | .        |
| ACa07 | X | 61687523 | .         | G | C | . | PASS | .       | inte  | NOI | dis | .        |
| ACa07 | X | 61691656 | .         | A | G | . | PASS | .       | inte  | NOI | dis | .        |
| ACa07 | X | 61691693 | rs7124105 | C | A | . | PASS | .       | inte  | NOI | dis | .        |
| ACa07 | X | 61710635 | .         | A | G | . | PASS | .       | inte  | NOI | dis | .        |
| ACa07 | X | 61712534 | rs3765099 | T | G | . | PASS | .       | inte  | NOI | dis | .        |
| ACa07 | X | 61717326 | .         | T | C | . | PASS | .       | inte  | NOI | dis | .        |
| ACa07 | X | 61717473 | .         | T | G | . | PASS | .       | inte  | NOI | dis | .        |
| ACa07 | X | 61717952 | .         | A | C | . | PASS | .       | inte  | NOI | dis | .        |
| ACa07 | X | 61719733 | .         | G | A | . | PASS | .       | inte  | NOI | dis | .        |
| ACa07 | X | 63653978 | .         | C | A | . | PASS | .       | inte  | NM_ | dis | .        |
| ACa07 | X | 67944001 | .         | C | A | . | PASS | STARD1  | intr  | NM_ | .   | .        |
| ACa07 | X | 67991777 | rs7687527 | G | A | . | PASS | .       | inte  | NM_ | dis | .        |
| ACa07 | X | 69497114 | .         | G | C | . | PASS | ARR3    | intr  | NM_ | .   | .        |
| ACa07 | X | 70345997 | rs7507300 | C | T | . | PASS | MED12   | exon  | NM_ | .   | missens  |
| ACa07 | X | 70443876 | rs8632249 | C | T | . | PASS | GJB1    | exon  | NM_ | .   | missens  |
| ACa07 | X | 70613114 | rs7685308 | G | A | . | PASS | BCYRN   | ncR   | NR_ | .   | .        |
| ACa07 | X | 70628064 | .         | C | A | . | PASS | BCYRN   | ncR   | NR_ | .   | .        |
| ACa07 | X | 71792574 | .         | G | A | . | PASS | HDAC8   | exon  | NM_ | .   | missens  |
| ACa07 | X | 71932644 | .         | C | T | . | PASS | PHKA1   | exon  | NM_ | .   | missens  |
| ACa07 | X | 72674385 | .         | A | G | . | PASS | CDX4    | exon  | NM_ | .   | synonym  |
| ACa07 | X | 72989914 | .         | G | A | . | PASS | .       | inte  | NM_ | dis | .        |
| ACa07 | X | 73619356 | .         | G | T | . | PASS | .       | inte  | NM_ | dis | .        |
| ACa07 | X | 73963938 | .         | C | A | . | PASS | KIAA202 | exon  | NM_ | .   | stopgain |
| ACa07 | X | 79816293 | .         | A | G | . | PASS | .       | inte  | NM_ | dis | .        |
| ACa07 | X | 80064940 | .         | C | T | . | PASS | BRWD3   | exon  | NM_ | .   | missens  |
| ACa07 | X | 91131885 | .         | G | A | . | PASS | PCDH1   | exon  | NM_ | .   | missens  |
| ACa07 | X | 91134064 | .         | C | A | . | PASS | PCDH1   | exon  | NM_ | .   | missens  |
| ACa07 | X | 91714781 | .         | C | T | . | PASS | PCDH1   | intr  | NM_ | .   | .        |
| ACa07 | X | 91751081 | .         | T | C | . | PASS | PCDH1   | intr  | NM_ | .   | .        |
| ACa07 | X | 95788407 | rs9672698 | G | A | . | PASS | .       | inte  | NR_ | dis | .        |
| ACa07 | X | 1E+08    | .         | G | A | . | PASS | NOX1    | exon  | NM_ | .   | missens  |
| ACa07 | X | 1.01E+08 | .         | C | A | . | PASS | NXF5    | exon  | NM_ | .   | missens  |

|        |    |          |           |           |   |   |      |                         |                         |
|--------|----|----------|-----------|-----------|---|---|------|-------------------------|-------------------------|
| ACa07  | X  | 1.01E+08 | .         | C         | T | . | PASS | TCEAL2 intrc NM_ . .    |                         |
| ACa07  | X  | 1.04E+08 | rs1507941 | C         | T | . | PASS | IL1RAP intrc NM_ . .    |                         |
| ACa07  | X  | 1.09E+08 | .         | G         | A | . | PASS | ACSL4 UTF NM_ NM.       |                         |
| ACa07  | X  | 1.18E+08 | .         | C         | A | . | PASS | LINC017 ncR NR_ . .     |                         |
| ACa07  | X  | 1.18E+08 | rs8664003 | T         | C | . | PASS | . intrc NR_ dis .       |                         |
| ACa07  | X  | 1.19E+08 | .         | C         | T | . | PASS | SLC25A ncR NR_ . .      |                         |
| ACa07  | X  | 1.2E+08  | .         | C         | T | . | PASS | CUL4B intrc NM_ . .     |                         |
| ACa07  | X  | 1.24E+08 | .         | G         | A | . | PASS | . intrc NM_ dis .       |                         |
| ACa07  | X  | 1.27E+08 | rs1387255 | C         | T | . | PASS | ACTRT exo NM_ missens   |                         |
| ACa07  | X  | 1.29E+08 | .         | A         | G | . | PASS | ZNF280 intrc NM_ . .    |                         |
| ACa07  | X  | 1.33E+08 | .         | C         | A | . | PASS | GPC3 intrc NM_ . .      |                         |
| ACa07  | X  | 1.35E+08 | .         | C         | T | . | PASS | SLC9A6 intrc NM_ . .    |                         |
| ACa07  | X  | 1.35E+08 | .         | G         | T | . | PASS | GPR112 intrc NM_ . .    |                         |
| ACa07  | X  | 1.39E+08 | .         | A         | G | . | PASS | ATP11C exo NM_ synonymr |                         |
| ACa07  | X  | 1.4E+08  | .         | G         | A | . | PASS | LDOC1, intrc NM_ dis .  |                         |
| ACa07  | X  | 1.49E+08 | .         | C         | T | . | PASS | MAGEA exo NM_ synonymr  |                         |
| ACa07  | X  | 1.49E+08 | rs7823749 | C         | T | . | PASS | CXorf4C UTF NM_ NM.     |                         |
| ACa07  | X  | 1.51E+08 | .         | G         | A | . | PASS | CNGA2 exo NM_ missens   |                         |
| ACa07  | X  | 1.53E+08 | rs3712627 | C         | T | . | PASS | . intrc NM_ dis .       |                         |
| ACa07  | X  | 1.53E+08 | .         | G         | T | . | PASS | BGN exo NM_ missens     |                         |
| ACa07  | X  | 1.53E+08 | .         | G         | A | . | PASS | ATP2B3 intrc NM_ . .    |                         |
| ACa07  | X  | 1.53E+08 | rs7825278 | G         | A | . | PASS | SSR4 intrc NM_ . .      |                         |
| ACa07  | X  | 1.53E+08 | .         | G         | A | . | PASS | L1CAM intrc NM_ . .     |                         |
| ACa07  | X  | 1.53E+08 | .         | G         | A | . | PASS | L1CAM intrc NM_ . .     |                         |
| ACa07  | X  | 1.53E+08 | .         | G         | A | . | PASS | RENBP splic NM_ NM.     |                         |
| ACa07  | X  | 1.53E+08 | .         | C         | T | . | PASS | HCFC1 intrc NM_ . .     |                         |
| ACa07  | X  | 1.54E+08 | .         | G         | A | . | PASS | SLC10A exo NM_ synonymr |                         |
| ACa07  | X  | 1.54E+08 | rs7819487 | C         | T | . | PASS | G6PD exo NM_ missens    |                         |
| ACa07  | X  | 1.54E+08 | .         | C         | T | . | PASS | DKC1 intrc NM_ . .      |                         |
| ACa07  | X  | 1.54E+08 | .         | G         | A | . | PASS | MPP1 UTF NM_ NM.        |                         |
| ACa07  | X  | 1.54E+08 | .         | G         | A | . | PASS | SMIM9 UTF NM_ NM.       |                         |
| ACa07  | X  | 1.55E+08 | .         | A         | G | . | PASS | TMLHE exo NM_ missens   |                         |
| ACa07  | Y  | 13323970 | .         | C         | T | . | PASS | . intrc NON dis .       |                         |
| ACa07  | MT | 9459     | rs8791767 | C         | T | . | PASS | . intrc NON dis .       |                         |
| ACa07  | MT | 11376    | .         | A         | T | . | PASS | . intrc NON dis .       |                         |
| ACa07  | MT | 15312    | .         | T         | C | . | PASS | . intrc NON dis .       |                         |
| ACaP01 |    | 1        | 16778593  | rs5750552 | C | T | .    | PASS                    | NECAP1 intrc NM_ . .    |
| ACaP01 |    | 1        | 16899877  | rs4101081 | C | T | .    | PASS                    | NBPF1 intrc NM_ . .     |
| ACaP01 |    | 1        | 16914515  | rs7629862 | A | C | .    | PASS                    | NBPF1 intrc NM_ . .     |
| ACaP01 |    | 1        | 16960070  | .         | T | C | .    | PASS                    | . intrc NR_ dis .       |
| ACaP01 |    | 1        | 21324110  | .         | C | A | .    | PASS                    | EIF4G3 exo NM_ missens  |
| ACaP01 |    | 1        | 1.43E+08  | rs3772379 | G | C | .    | PASS                    | . intrc NR_ dis .       |
| ACaP01 |    | 1        | 1.43E+08  | rs3720400 | G | T | .    | PASS                    | . intrc NR_ dis .       |
| ACaP01 |    | 1        | 1.45E+08  | rs6181337 | T | C | .    | PASS                    | NBPF2 ncR NR_ . .       |
| ACaP01 |    | 1        | 2.48E+08  | .         | G | T | .    | PASS                    | . ups NM_ . .           |
| ACaP01 |    | 2        | 85596991  | .         | G | T | .    | PASS                    | ELMOD intrc NM_ . .     |
| ACaP01 |    | 2        | 91692533  | rs1649505 | G | C | .    | PASS                    | . intrc NON dis .       |
| ACaP01 |    | 3        | 97311535  | rs7933313 | G | A | .    | PASS                    | EPHA6 exo NM_ synonymr  |
| ACaP01 |    | 3        | 1.3E+08   | rs7480655 | C | T | .    | PASS                    | COL6A6 exo NM_ synonymr |
| ACaP01 |    | 3        | 1.33E+08  | .         | C | A | .    | PASS                    | TOPBP1 exo NM_ missens  |
| ACaP01 |    | 4        | 9232841   | .         | C | T | .    | PASS                    | . intrc NM_ dis .       |
| ACaP01 |    | 5        | 734072    | rs671688  | A | G | .    | PASS                    | . intrc NM_ dis .       |
| ACaP01 |    | 5        | 34179550  | rs8681576 | G | T | .    | PASS                    | . intrc NR_ dis .       |
| ACaP01 |    | 5        | 1.78E+08  | .         | T | C | .    | PASS                    | CLK4 exo NM_ synonymr   |



|        |    |          |           |   |   |   |      |         |       |     |     |          |
|--------|----|----------|-----------|---|---|---|------|---------|-------|-----|-----|----------|
| ACaP01 | 6  | 1.49E+08 | .         | A | G | . | PASS | SASH1   | intrc | NM_ | .   | .        |
| ACaP01 | 7  | 38503768 | .         | T | C | . | PASS | AMPH    | intrc | NM_ | .   | .        |
| ACaP01 | 7  | 44060096 | .         | C | T | . | PASS | .       | inte  | NR_ | dis | .        |
| ACaP01 | 7  | 1.16E+08 | .         | C | T | . | PASS | TFEC    | splic | NM_ | NM  | .        |
| ACaP01 | 7  | 1.5E+08  | rs1471823 | G | A | . | PASS | GIMAP5  | exo   | NM_ | .   | missens  |
| ACaP01 | 8  | 21840110 | rs7496607 | G | A | . | PASS | XPO7    | intrc | NM_ | .   | .        |
| ACaP01 | 8  | 22168690 | .         | C | T | . | PASS | PIWIL2  | exo   | NM_ | .   | synonyr  |
| ACaP01 | 9  | 69449944 | rs1482733 | G | T | . | PASS | .       | inte  | NM_ | dis | .        |
| ACaP01 | 9  | 1.31E+08 | .         | G | T | . | PASS | WDR34   | intrc | NM_ | .   | .        |
| ACaP01 | 10 | 47207813 | rs2020143 | T | C | . | PASS | AGAP9   | exo   | NM_ | .   | missens  |
| ACaP01 | 10 | 1E+08    | .         | A | C | . | PASS | HPSE2   | exo   | NM_ | .   | missens  |
| ACaP01 | 11 | 46797908 | rs7731324 | G | A | . | PASS | CKAP5   | exo   | NM_ | .   | missens  |
| ACaP01 | 11 | 57157532 | .         | A | T | . | PASS | PRG2    | intrc | NM_ | .   | .        |
| ACaP01 | 12 | 49433687 | rs7734351 | G | A | . | PASS | KMT2D   | exo   | NM_ | .   | synonyr  |
| ACaP01 | 12 | 52642506 | rs7769669 | C | T | . | PASS | KRT7    | exo   | NM_ | .   | missens  |
| ACaP01 | 14 | 1.06E+08 | .         | G | A | . | PASS | JAG2    | exo   | NM_ | .   | synonyr  |
| ACaP01 | 14 | 1.06E+08 | rs7157981 | C | T | . | PASS | .       | inte  | NR_ | dis | .        |
| ACaP01 | 15 | 20740075 | rs2019940 | T | G | . | PASS | GOLGA   | exo   | NM_ | .   | missens  |
| ACaP01 | 15 | 20740088 | rs3731461 | A | G | . | PASS | GOLGA   | exo   | NM_ | .   | synonyr  |
| ACaP01 | 15 | 25416142 | .         | C | A | . | PASS | .       | dow   | NR_ | .   | .        |
| ACaP01 | 15 | 30771144 | .         | A | G | . | PASS | .       | inte  | NM_ | dis | .        |
| ACaP01 | 15 | 69706957 | .         | C | A | . | PASS | KIF23   | intrc | NM_ | .   | .        |
| ACaP01 | 16 | 27457419 | .         | C | T | . | PASS | IL21R   | intrc | NM_ | .   | .        |
| ACaP01 | 17 | 5328662  | rs7781206 | T | C | . | PASS | RPAIN   | intrc | NM_ | .   | .        |
| ACaP01 | 17 | 36333536 | rs3725436 | A | C | . | PASS | .       | inte  | NM_ | dis | .        |
| ACaP01 | 19 | 33490585 | rs7861545 | G | A | . | PASS | RHPN2   | exo   | NM_ | .   | stopgair |
| ACaP01 | 19 | 40411685 | .         | C | T | . | PASS | FCGBP   | exo   | NM_ | .   | missens  |
| ACaP01 | 19 | 41763678 | .         | C | G | . | PASS | AXL     | intrc | NM_ | .   | .        |
| ACaP01 | 20 | 35152507 | .         | A | T | . | PASS | RP5-97  | ncR   | NR_ | .   | .        |
| ACaP01 | 21 | 11114515 | rs9266067 | A | G | . | PASS | .       | inte  | NM_ | dis | .        |
| ACaP01 | X  | 32380995 | rs7663121 | G | A | . | PASS | DMD     | exo   | NM_ | .   | synonyr  |
| ACaP01 | X  | 70636506 | rs3397828 | A | G | . | PASS | BCYRN   | ncR   | NR_ | .   | .        |
| ACaP02 | 1  | 16265634 | .         | G | A | . | PASS | SPEN    | intrc | NM_ | .   | .        |
| ACaP02 | 1  | 16931257 | rs436293  | C | T | . | PASS | NBPF1   | intrc | NM_ | .   | .        |
| ACaP02 | 1  | 32128301 | .         | G | T | . | PASS | COL16A1 | intrc | NM_ | .   | .        |
| ACaP02 | 1  | 32670897 | .         | G | C | . | PASS | CCDC2   | UTF   | NM_ | NM  | .        |
| ACaP02 | 1  | 1.01E+08 | rs3721234 | C | T | . | PASS | SASS6   | intrc | NM_ | .   | .        |
| ACaP02 | 1  | 1.09E+08 | .         | G | A | . | PASS | FNDC7   | intrc | NM_ | .   | .        |
| ACaP02 | 1  | 1.45E+08 | rs2007574 | G | C | . | PASS | NBPF2   | intrc | NM_ | .   | .        |
| ACaP02 | 1  | 1.45E+08 | rs9424724 | G | C | . | PASS | NBPF2   | ncR   | NR_ | .   | .        |
| ACaP02 | 1  | 1.52E+08 | .         | T | G | . | PASS | .       | inte  | NM_ | dis | .        |
| ACaP02 | 1  | 1.56E+08 | .         | G | A | . | PASS | TMEM7   | exo   | NM_ | .   | synonyr  |
| ACaP02 | 1  | 1.56E+08 | .         | G | C | . | PASS | C1orf85 | exo   | NM_ | .   | missens  |
| ACaP02 | 1  | 1.59E+08 | .         | C | G | . | PASS | SPTA1   | intrc | NM_ | .   | .        |
| ACaP02 | 1  | 1.59E+08 | .         | G | C | . | PASS | DARC    | UTF   | NM_ | NM  | .        |
| ACaP02 | 1  | 1.6E+08  | .         | C | T | . | PASS | DCAF8   | exo   | NM_ | .   | missens  |
| ACaP02 | 1  | 1.62E+08 | .         | G | C | . | PASS | FCRLB   | intrc | NM_ | .   | .        |
| ACaP02 | 1  | 1.83E+08 | .         | C | T | . | PASS | SHCBP   | exo   | NM_ | .   | missens  |
| ACaP02 | 1  | 1.97E+08 | rs9662955 | G | A | . | PASS | CFHR5   | intrc | NM_ | .   | .        |
| ACaP02 | 1  | 2.28E+08 | rs7570105 | G | A | . | PASS | WNT3A   | exo   | NM_ | .   | missens  |
| ACaP02 | 1  | 2.33E+08 | .         | C | G | . | PASS | KIAA181 | exo   | NM_ | .   | synonyr  |
| ACaP02 | 1  | 2.37E+08 | .         | G | A | . | PASS | MTR     | intrc | NM_ | .   | .        |
| ACaP02 | 1  | 2.41E+08 | .         | C | T | . | PASS | FMN2    | UTF   | NM_ | NM  | .        |
| ACaP02 | 2  | 38925391 | .         | C | T | . | PASS | GALM    | intrc | NM_ | .   | .        |

|        |   |          |           |   |   |   |      |        |       |        |          |
|--------|---|----------|-----------|---|---|---|------|--------|-------|--------|----------|
| ACaP02 | 2 | 44053534 | rs1420196 | G | A | . | PASS | ABCG5  | exon  | NM_    | missens  |
| ACaP02 | 2 | 1.5E+08  | .         | T | C | . | PASS | LYPD6E | intrc | NM_    | .        |
| ACaP02 | 2 | 1.6E+08  | .         | C | T | . | PASS | TANC1  | exon  | NM_    | missens  |
| ACaP02 | 2 | 1.97E+08 | .         | C | G | . | PASS | SLC39A | exon  | NM_    | missens  |
| ACaP02 | 2 | 1.98E+08 | rs1857895 | C | T | . | PASS | HSPD1  | intrc | NM_    | .        |
| ACaP02 | 2 | 2.08E+08 | .         | G | C | . | PASS | KLF7   | intrc | NM_    | .        |
| ACaP02 | 2 | 2.25E+08 | .         | G | T | . | PASS | WDFY1  | intrc | NM_    | .        |
| ACaP02 | 2 | 2.35E+08 | .         | G | C | . | PASS | MROH2  | exon  | NM_    | missens  |
| ACaP02 | 2 | 2.42E+08 | rs7784676 | G | A | . | PASS | STK25  | exon  | NM_    | missens  |
| ACaP02 | 3 | 33434142 | .         | G | C | . | PASS | UBP1   | intrc | NM_    | .        |
| ACaP02 | 3 | 97652428 | .         | A | G | . | PASS | CRYBG  | intrc | NM_    | .        |
| ACaP02 | 3 | 1.34E+08 | .         | G | T | . | PASS | CEP63  | exon  | NM_    | missens  |
| ACaP02 | 3 | 1.34E+08 | .         | G | A | . | PASS | CEP63  | exon  | NM_    | missens  |
| ACaP02 | 3 | 1.38E+08 | .         | G | C | . | PASS | ARMC8  | intrc | NM_    | .        |
| ACaP02 | 3 | 1.68E+08 | rs7462149 | G | A | . | PASS | GOLIM2 | exon  | NM_    | stopgain |
| ACaP02 | 3 | 1.72E+08 | .         | G | C | . | PASS | TNFSF1 | UTF   | NM_NM  | .        |
| ACaP02 | 3 | 1.79E+08 | rs1048860 | G | A | . | PASS | PIK3CA | exon  | NM_    | missens  |
| ACaP02 | 3 | 1.84E+08 | .         | A | C | . | PASS | YEATS2 | exon  | NM_    | missens  |
| ACaP02 | 4 | 944346   | .         | C | T | . | PASS | TMEM1  | intrc | NM_    | .        |
| ACaP02 | 4 | 95173994 | .         | G | A | . | PASS | SMARC  | exon  | NM_    | missens  |
| ACaP02 | 4 | 1.09E+08 | .         | C | T | . | PASS | CYP2U  | intrc | NM_    | .        |
| ACaP02 | 4 | 1.4E+08  | .         | C | T | . | PASS | NAA15  | exon  | NM_    | missens  |
| ACaP02 | 4 | 1.43E+08 | .         | C | G | . | PASS | INPP4B | exon  | NM_    | missens  |
| ACaP02 | 4 | 1.72E+08 | .         | C | T | . | PASS | .      | dow   | NR_    | .        |
| ACaP02 | 5 | 33969172 | rs1876921 | G | C | . | PASS | SLC45A | intrc | NM_    | .        |
| ACaP02 | 5 | 63665546 | .         | G | C | . | PASS | RNF18C | exon  | NM_    | missens  |
| ACaP02 | 5 | 76029074 | .         | C | T | . | PASS | F2R    | exon  | NM_    | missens  |
| ACaP02 | 5 | 1.34E+08 | rs7956159 | C | T | . | PASS | SEC24L | exon  | NM_    | missens  |
| ACaP02 | 5 | 1.57E+08 | .         | C | G | . | PASS | FAM71E | exon  | NM_    | missens  |
| ACaP02 | 5 | 1.63E+08 | .         | G | A | . | PASS | HMMR   | exon  | NM_    | synonym  |
| ACaP02 | 5 | 1.7E+08  | .         | G | A | . | PASS | KCNIP1 | exon  | NM_    | missens  |
| ACaP02 | 6 | 2692903  | .         | C | A | . | PASS | MYLK4  | intrc | NM_    | .        |
| ACaP02 | 6 | 10894173 | .         | A | G | . | PASS | SYCP2L | exon  | NM_    | missens  |
| ACaP02 | 6 | 26501806 | .         | G | A | . | PASS | BTN1A1 | intrc | NM_    | .        |
| ACaP02 | 6 | 29911685 | rs1787910 | C | T | . | PASS | HLA-A  | intrc | NM_    | .        |
| ACaP02 | 6 | 30231416 | rs5364899 | A | G | . | PASS | HLA-L  | ncR   | NR_    | .        |
| ACaP02 | 6 | 64694337 | .         | C | G | . | PASS | EYS    | exon  | NM_    | missens  |
| ACaP02 | 6 | 65301337 | .         | C | T | . | PASS | EYS    | exon  | NM_    | missens  |
| ACaP02 | 6 | 1.49E+08 | .         | C | T | . | PASS | .      | inte  | NM_dis | .        |
| ACaP02 | 6 | 1.68E+08 | .         | C | G | . | PASS | KIF25  | intrc | NM_    | .        |
| ACaP02 | 7 | 5347198  | .         | G | C | . | PASS | TNRC18 | UTF   | NM_NM  | .        |
| ACaP02 | 7 | 63210111 | .         | C | A | . | PASS | .      | inte  | NR_dis | .        |
| ACaP02 | 7 | 88956826 | .         | C | A | . | PASS | ZNF804 | intrc | NM_    | .        |
| ACaP02 | 7 | 1.31E+08 | .         | C | T | . | PASS | .      | dow   | NR_    | .        |
| ACaP02 | 7 | 1.38E+08 | rs3685111 | G | C | . | PASS | CREB3L | intrc | NM_    | .        |
| ACaP02 | 8 | 29120432 | .         | G | A | . | PASS | KIF13B | intrc | NM_    | .        |
| ACaP02 | 8 | 69009261 | .         | A | T | . | PASS | PREX2  | exon  | NM_    | missens  |
| ACaP02 | 8 | 1.22E+08 | .         | G | A | . | PASS | SNTB1  | UTF   | NM_NM  | .        |
| ACaP02 | 8 | 1.45E+08 | .         | C | T | . | PASS | NAPRT  | exon  | NM_    | missens  |
| ACaP02 | 8 | 1.45E+08 | rs3743103 | C | T | . | PASS | PLEC   | exon  | NM_    | missens  |
| ACaP02 | 9 | 68415292 | rs4928838 | C | T | . | PASS | .      | inte  | NM_dis | .        |
| ACaP02 | 9 | 89876064 | .         | G | A | . | PASS | .      | inte  | NM_dis | .        |
| ACaP02 | 9 | 96398757 | .         | G | A | . | PASS | PHF2   | exon  | NM_    | synonym  |
| ACaP02 | 9 | 1.17E+08 | .         | C | T | . | PASS | AKNA   | intrc | NM_    | .        |

|        |    |          |           |   |   |   |      |         |       |         |   |         |
|--------|----|----------|-----------|---|---|---|------|---------|-------|---------|---|---------|
| ACaP02 | 9  | 1.36E+08 | .         | T | A | . | PASS | DDX31   | intrc | NM_     | . | .       |
| ACaP02 | 10 | 323462   | .         | C | T | . | PASS | DIP2C   | exo   | NM_     | . | missens |
| ACaP02 | 10 | 3150111  | .         | G | A | . | PASS | PFKP    | intrc | NM_     | . | .       |
| ACaP02 | 10 | 88988731 | rs3128226 | C | G | . | PASS | NUTM2   | intrc | NM_     | . | .       |
| ACaP02 | 10 | 1.35E+08 | .         | G | C | . | PASS | KNDC1   | intrc | NM_     | . | .       |
| ACaP02 | 11 | 4744416  | .         | C | T | . | PASS | .       | inte  | NM_dis  | . | .       |
| ACaP02 | 11 | 19864378 | .         | C | G | . | PASS | NAV2    | intrc | NM_     | . | .       |
| ACaP02 | 11 | 45948953 | .         | C | T | . | PASS | GYLTL1  | exo   | NM_     | . | synonyr |
| ACaP02 | 11 | 61735932 | .         | G | A | . | PASS | .       | ups   | NM_     | . | .       |
| ACaP02 | 11 | 78399235 | .         | G | A | . | PASS | TENM4   | exo   | NM_     | . | synonyr |
| ACaP02 | 11 | 1.17E+08 | .         | G | A | . | PASS | SIK3    | intrc | NM_     | . | .       |
| ACaP02 | 11 | 1.23E+08 | .         | G | A | . | PASS | .       | ups   | NM_     | . | .       |
| ACaP02 | 12 | 68657    | rs5382343 | T | C | . | PASS | .       | inte  | NON_dis | . | .       |
| ACaP02 | 12 | 14650790 | .         | A | G | . | PASS | ATF7IP  | exo   | NM_     | . | missens |
| ACaP02 | 12 | 27641424 | .         | C | G | . | PASS | SMCO2   | exo   | NM_     | . | missens |
| ACaP02 | 12 | 64838770 | rs8658204 | T | A | . | PASS | XPOT    | intrc | NM_     | . | .       |
| ACaP02 | 12 | 80840657 | .         | C | T | . | PASS | PTPRQ   | intrc | NM_     | . | .       |
| ACaP02 | 12 | 1.13E+08 | .         | G | A | . | PASS | NAA25   | exo   | NM_     | . | synonyr |
| ACaP02 | 12 | 1.18E+08 | rs7707492 | G | A | . | PASS | NOS1    | exo   | NM_     | . | missens |
| ACaP02 | 13 | 30353182 | .         | T | A | . | PASS | UBL3    | intrc | NM_     | . | .       |
| ACaP02 | 13 | 32811934 | rs3702294 | G | A | . | PASS | FRY     | exo   | NM_     | . | missens |
| ACaP02 | 13 | 39263609 | rs4129275 | C | T | . | PASS | FREM2   | exo   | NM_     | . | missens |
| ACaP02 | 13 | 39264019 | .         | C | G | . | PASS | FREM2   | exo   | NM_     | . | missens |
| ACaP02 | 13 | 61987109 | .         | C | T | . | PASS | PCDH2   | (exo  | NM_     | . | missens |
| ACaP02 | 13 | 78337257 | .         | C | G | . | PASS | SLAIN1  | intrc | NM_     | . | .       |
| ACaP02 | 13 | 78337320 | .         | C | G | . | PASS | SLAIN1  | exo   | NM_     | . | missens |
| ACaP02 | 13 | 1.03E+08 | .         | G | A | . | PASS | CCDC1   | (exo  | NM_     | . | missens |
| ACaP02 | 14 | 22265543 | rs3699116 | C | T | . | PASS | .       | inte  | NM_dis  | . | .       |
| ACaP02 | 14 | 36240320 | rs7660001 | C | T | . | PASS | RALGAI  | ncR   | NR_     | . | .       |
| ACaP02 | 14 | 93762356 | .         | C | T | . | PASS | BTBD7   | exo   | NM_     | . | synonyr |
| ACaP02 | 14 | 95677219 | .         | G | A | . | PASS | CLMN    | splic | NM_NV   | . | .       |
| ACaP02 | 14 | 1.05E+08 | rs1214345 | C | T | . | PASS | AKT1    | exo   | NM_     | . | missens |
| ACaP02 | 14 | 1.07E+08 | .         | G | A | . | PASS | .       | inte  | NR_dis  | . | .       |
| ACaP02 | 15 | 20644362 | rs4932010 | G | A | . | PASS | HERC2   | ncR   | NR_     | . | .       |
| ACaP02 | 15 | 21036908 | rs7494426 | C | G | . | PASS | .       | inte  | NR_dis  | . | .       |
| ACaP02 | 15 | 22016259 | rs1079463 | T | C | . | PASS | CXADR   | ncR   | NR_     | . | .       |
| ACaP02 | 15 | 22058425 | rs1823548 | G | C | . | PASS | LOC33   | intrc | NM_     | . | .       |
| ACaP02 | 15 | 25313171 | .         | G | A | . | PASS | .       | dow   | NR_     | . | .       |
| ACaP02 | 15 | 40681418 | rs1861770 | C | T | . | PASS | KNSTR   | intrc | NM_     | . | .       |
| ACaP02 | 15 | 44962225 | rs9953164 | G | A | . | PASS | PATL2   | exo   | NM_     | . | missens |
| ACaP02 | 15 | 45839258 | .         | G | C | . | PASS | HMG     | ncR   | NR_     | . | .       |
| ACaP02 | 15 | 72461122 | .         | G | A | . | PASS | GRAM    | intrc | NM_     | . | .       |
| ACaP02 | 15 | 78501642 | .         | G | A | . | PASS | ACSBG   | intrc | NM_     | . | .       |
| ACaP02 | 15 | 81410105 | .         | C | T | . | PASS | .       | inte  | NM_dis  | . | .       |
| ACaP02 | 16 | 3081097  | .         | C | T | . | PASS | CCDC6   | exo   | NM_     | . | missens |
| ACaP02 | 16 | 32214205 | .         | G | A | . | PASS | .       | inte  | NR_dis  | . | .       |
| ACaP02 | 16 | 56485604 | rs7759203 | C | T | . | PASS | OGFOD   | exo   | NM_     | . | missens |
| ACaP02 | 16 | 70802734 | .         | C | T | . | PASS | VAC14-  | ncR   | NR_     | . | .       |
| ACaP02 | 17 | 4803555  | .         | G | C | . | PASS | C17orf1 | exo   | NM_     | . | missens |
| ACaP02 | 17 | 36486118 | rs7810711 | C | T | . | PASS | GPR17   | exo   | NM_     | . | missens |
| ACaP02 | 17 | 42828228 | rs1509595 | G | A | . | PASS | DBF4B   | exo   | NM_     | . | synonyr |
| ACaP02 | 17 | 46691740 | .         | G | A | . | PASS | HOXB8   | exo   | NM_     | . | synonyr |
| ACaP02 | 17 | 76166892 | rs3742496 | C | T | . | PASS | SYNGR   | intrc | NM_     | . | .       |
| ACaP02 | 17 | 78356929 | rs5611679 | C | T | . | PASS | LOC10   | ncR   | NR_     | . | .       |

|        |    |          |           |   |   |   |      |        |       |        |          |
|--------|----|----------|-----------|---|---|---|------|--------|-------|--------|----------|
| ACaP02 | 17 | 79917411 | rs5502840 | G | A | . | PASS | NOTUM  | exon  | NM_    | synonym  |
| ACaP02 | 18 | 14186389 | rs1996954 | C | T | . | PASS | ANKRD  | ncR   | NR_    | .        |
| ACaP02 | 18 | 56149006 | .         | G | C | . | PASS | ALPK2  | UTF   | NM_NM_ | .        |
| ACaP02 | 19 | 9376928  | .         | C | G | . | PASS | .      | inte  | NM_dis | .        |
| ACaP02 | 19 | 18426987 | .         | G | A | . | PASS | LSM4   | intrc | NM_    | .        |
| ACaP02 | 19 | 19389565 | .         | G | T | . | PASS | SUGP1  | exon  | NM_    | missens  |
| ACaP02 | 19 | 19906197 | .         | C | T | . | PASS | ZNF506 | exon  | NM_    | missens  |
| ACaP02 | 19 | 36135341 | .         | C | T | . | PASS | ETV2   | intrc | NM_    | .        |
| ACaP02 | 19 | 37441599 | .         | C | G | . | PASS | ZNF568 | exon  | NM_    | stopgair |
| ACaP02 | 19 | 40724034 | .         | G | A | . | PASS | TTC9B  | exon  | NM_    | synonym  |
| ACaP02 | 19 | 43576796 | .         | G | C | . | PASS | PSG2   | intrc | NM_    | .        |
| ACaP02 | 19 | 55556685 | .         | C | G | . | PASS | RDH13  | intrc | NM_    | .        |
| ACaP02 | 20 | 1162284  | .         | G | C | . | PASS | TMEM7  | intrc | NM_    | .        |
| ACaP02 | 20 | 2411210  | .         | G | A | . | PASS | TGM6   | exon  | NM_    | synonym  |
| ACaP02 | 20 | 5170828  | rs1438597 | G | A | . | PASS | CDS2   | exon  | NM_    | missens  |
| ACaP02 | 20 | 30534404 | .         | G | C | . | PASS | PDRG1  | intrc | NM_    | .        |
| ACaP02 | 20 | 36759941 | .         | T | C | . | PASS | TGM2   | intrc | NM_    | .        |
| ACaP02 | 21 | 11026667 | rs1170118 | T | C | . | PASS | BAGE4, | intrc | NM_    | .        |
| ACaP02 | 21 | 17214771 | .         | C | G | . | PASS | USP25  | exon  | NM_    | stopgair |
| ACaP02 | 22 | 19959033 | .         | G | C | . | PASS | ARVCF  | intrc | NM_    | .        |
| ACaP02 | 22 | 31090253 | .         | C | T | . | PASS | OSBP2  | exon  | NM_    | missens  |
| ACaP02 | 22 | 38271958 | .         | C | A | . | PASS | EIF3L  | exon  | NM_    | synonym  |
| ACaP02 | X  | 3021841  | rs7509188 | G | A | . | PASS | ARSF   | exon  | NM_    | missens  |
| ACaP02 | X  | 25031637 | .         | G | A | . | PASS | ARX    | exon  | NM_    | missens  |
| ACaP02 | X  | 46299761 | .         | T | A | . | PASS | .      | inte  | NR_dis | .        |
| ACaP02 | X  | 69573529 | .         | G | A | . | PASS | KIF4A  | exon  | NM_    | missens  |
| ACaP02 | X  | 1.19E+08 | .         | G | C | . | PASS | NKAP   | exon  | NM_    | missens  |
| ACaP02 | X  | 1.39E+08 | .         | T | A | . | PASS | SRD5A' | ncR   | NR_    | .        |
| ACaP02 | X  | 1.39E+08 | .         | T | A | . | PASS | SRD5A' | ncR   | NR_    | .        |
| ACaP02 | X  | 1.51E+08 | .         | G | C | . | PASS | GABRA  | intrc | NM_    | .        |
| ACaP02 | X  | 1.53E+08 | .         | C | T | . | PASS | IRAK1  | UTF   | NM_NM_ | .        |
| ACaP02 | MT | 13324    | .         | T | C | . | PASS | .      | inte  | NON    | dis      |
| ACaP03 | 1  | 1666303  | rs1149286 | T | C | . | PASS | SLC35E | intrc | NM_    | .        |
| ACaP03 | 1  | 25784928 | .         | C | A | . | PASS | TMEM5  | exon  | NM_    | missens  |
| ACaP03 | 1  | 74835045 | .         | C | T | . | PASS | FPGT-T | intrc | NM_    | .        |
| ACaP03 | 1  | 86482866 | .         | G | A | . | PASS | COL24A | exon  | NM_    | missens  |
| ACaP03 | 1  | 1.21E+08 | rs1998147 | T | C | . | PASS | FCGR1I | UTF   | NM_NM_ | .        |
| ACaP03 | 1  | 1.43E+08 | rs8662584 | G | T | . | PASS | .      | inte  | NR_dis | .        |
| ACaP03 | 2  | 54850869 | .         | T | A | . | PASS | SPTBN' | intrc | NM_    | .        |
| ACaP03 | 2  | 67630477 | .         | G | A | . | PASS | ETAA1  | exon  | NM_    | missens  |
| ACaP03 | 2  | 85133304 | .         | C | G | . | PASS | TMSB1C | intrc | NM_    | .        |
| ACaP03 | 2  | 1.22E+08 | rs3708851 | C | T | . | PASS | GLI2   | exon  | NM_    | synonym  |
| ACaP03 | 2  | 1.36E+08 | rs2008806 | T | A | . | PASS | R3HDM  | intrc | NM_    | .        |
| ACaP03 | 2  | 1.69E+08 | rs9042902 | C | T | . | PASS | STK39  | intrc | NM_    | .        |
| ACaP03 | 2  | 2.18E+08 | rs3702772 | C | T | . | PASS | IGFBP5 | intrc | NM_    | .        |
| ACaP03 | 2  | 2.35E+08 | rs5574456 | G | A | . | PASS | TRPM8  | intrc | NM_    | .        |
| ACaP03 | 3  | 23499994 | rs1446637 | C | T | . | PASS | MIR548 | ncR   | NR_    | .        |
| ACaP03 | 3  | 37018036 | .         | G | T | . | PASS | .      | inte  | NM_dis | .        |
| ACaP03 | 3  | 1.14E+08 | .         | C | T | . | PASS | GRAMC  | exon  | NM_    | synonym  |
| ACaP03 | 3  | 1.14E+08 | rs2015548 | C | T | . | PASS | DRD3   | exon  | NM_    | missens  |
| ACaP03 | 4  | 13475825 | rs1163261 | C | T | . | PASS | RAB28  | intrc | NM_    | .        |
| ACaP03 | 4  | 49165624 | rs4695484 | C | G | . | PASS | .      | inte  | NM_dis | .        |
| ACaP03 | 4  | 49165647 | rs4695485 | G | T | . | PASS | .      | inte  | NM_dis | .        |
| ACaP03 | 4  | 71255517 | rs7496227 | C | T | . | PASS | SMR3B  | exon  | NM_    | synonym  |

|        |    |          |           |   |   |   |      |         |       |         |         |
|--------|----|----------|-----------|---|---|---|------|---------|-------|---------|---------|
| ACaP03 | 4  | 1.86E+08 | rs7758415 | G | A | . | PASS | PDLIM3  | exon  | NM_     | missens |
| ACaP03 | 5  | 1.4E+08  | .         | C | T | . | PASS | PCDHA   | exon  | NM_     | synonyr |
| ACaP03 | 6  | 31850912 | rs1161907 | C | T | . | PASS | EHMT2   | intrc | NM_     | .       |
| ACaP03 | 6  | 76423203 | .         | G | T | . | PASS | SENP6   | intrc | NM_     | .       |
| ACaP03 | 6  | 80778603 | .         | T | A | . | PASS | .       | inte  | NM_dis  | .       |
| ACaP03 | 6  | 1.11E+08 | rs7577542 | C | T | . | PASS | CDK19   | UTF   | NM_NM   | .       |
| ACaP03 | 7  | 5112643  | .         | G | A | . | PASS | RBAKD1  | ncR   | NR_     | .       |
| ACaP03 | 7  | 87145947 | .         | C | A | . | PASS | ABCB1   | exon  | NM_     | missens |
| ACaP03 | 7  | 1.02E+08 | .         | T | C | . | PASS | FAM18E  | intrc | NM_     | .       |
| ACaP03 | 8  | 17849058 | rs7722351 | C | T | . | PASS | PCM1    | exon  | NM_     | synonyr |
| ACaP03 | 8  | 1.42E+08 | .         | G | T | . | PASS | PTK2    | intrc | NM_     | .       |
| ACaP03 | 9  | 1.4E+08  | rs7507213 | G | A | . | PASS | TRAF2   | exon  | NM_     | missens |
| ACaP03 | 10 | 10989346 | .         | T | A | . | PASS | LINC007 | ncR   | NR_     | .       |
| ACaP03 | 10 | 15649742 | rs7571508 | G | A | . | PASS | ITGA8   | exon  | NM_     | synonyr |
| ACaP03 | 10 | 38896297 | rs5655237 | C | T | . | PASS | .       | inte  | NR_dis  | .       |
| ACaP03 | 10 | 74452957 | rs7905448 | T | A | . | PASS | MCU     | intrc | NM_     | .       |
| ACaP03 | 10 | 91597898 | .         | G | A | . | PASS | LINC008 | ncR   | NR_     | .       |
| ACaP03 | 10 | 1.04E+08 | rs9706750 | C | T | . | PASS | LOC100  | ncR   | NR_     | .       |
| ACaP03 | 10 | 1.04E+08 | rs7723659 | A | G | . | PASS | SFXN2   | intrc | NM_     | .       |
| ACaP03 | 10 | 1.05E+08 | .         | G | A | . | PASS | INA     | exon  | NM_     | synonyr |
| ACaP03 | 10 | 1.23E+08 | rs1219134 | A | G | . | PASS | FGFR2   | exon  | NM_     | missens |
| ACaP03 | 11 | 688411   | .         | G | A | . | PASS | DEAF1   | exon  | NM_     | missens |
| ACaP03 | 11 | 17517143 | rs5453728 | G | A | . | PASS | USH1C   | exon  | NM_     | synonyr |
| ACaP03 | 11 | 17565822 | .         | A | G | . | PASS | USH1C   | exon  | NM_     | synonyr |
| ACaP03 | 11 | 1.2E+08  | .         | T | C | . | PASS | ARHGE   | intrc | NM_     | .       |
| ACaP03 | 12 | 1.13E+08 | rs1030864 | T | C | . | PASS | OAS1    | exon  | NM_     | missens |
| ACaP03 | 13 | 49027224 | .         | G | A | . | PASS | RB1     | exon  | NM_     | synonyr |
| ACaP03 | 13 | 78236783 | rs9145408 | C | T | . | PASS | .       | inte  | NM_dis  | .       |
| ACaP03 | 13 | 79233446 | rs9816818 | A | G | . | PASS | .       | ups   | NM_     | .       |
| ACaP03 | 14 | 23066954 | .         | G | T | . | PASS | .       | ups   | NM_     | .       |
| ACaP03 | 14 | 33525230 | .         | C | A | . | PASS | NPAS3   | intrc | NM_     | .       |
| ACaP03 | 14 | 45571879 | rs5634662 | G | A | . | PASS | PRPF3E  | exon  | NM_     | synonyr |
| ACaP03 | 14 | 53130502 | .         | G | A | . | PASS | ERO1L   | intrc | NM_     | .       |
| ACaP03 | 14 | 89151457 | .         | G | A | . | PASS | EML5    | exon  | NM_     | missens |
| ACaP03 | 14 | 1E+08    | .         | C | A | . | PASS | HHIPL1  | exon  | NM_     | missens |
| ACaP03 | 15 | 20481082 | .         | G | T | . | PASS | .       | inte  | NON_dis | .       |
| ACaP03 | 15 | 23388408 | rs7780894 | G | A | . | PASS | .       | inte  | NR_dis  | .       |
| ACaP03 | 15 | 42042562 | .         | T | C | . | PASS | MGA     | exon  | NM_     | missens |
| ACaP03 | 15 | 43075621 | .         | C | A | . | PASS | TTBK2   | exon  | NM_     | missens |
| ACaP03 | 16 | 67304885 | .         | C | T | . | PASS | SLC9A5  | exon  | NM_     | synonyr |
| ACaP03 | 17 | 8638951  | .         | A | T | . | PASS | CCDC4   | intrc | NM_     | .       |
| ACaP03 | 17 | 21905146 | rs5864828 | G | C | . | PASS | FLJ360  | ncR   | NR_     | .       |
| ACaP03 | 17 | 46874382 | rs7798230 | G | A | . | PASS | TTLL6   | intrc | NM_     | .       |
| ACaP03 | 18 | 5395522  | .         | C | A | . | PASS | EPB41L  | intrc | NM_     | .       |
| ACaP03 | 19 | 13418632 | rs7477304 | G | A | . | PASS | CACNA   | exon  | NM_     | synonyr |
| ACaP03 | 19 | 14952045 | .         | C | A | . | PASS | OR7A1   | exon  | NM_     | synonyr |
| ACaP03 | 19 | 35226977 | rs9472013 | T | C | . | PASS | ZNF181  | intrc | NM_     | .       |
| ACaP03 | 19 | 36368719 | .         | C | T | . | PASS | APLP1   | exon  | NM_     | missens |
| ACaP03 | 19 | 44272930 | .         | C | A | . | PASS | KCNN4   | intrc | NM_     | .       |
| ACaP03 | 19 | 51525990 | rs3718581 | C | T | . | PASS | KLK11   | intrc | NM_     | .       |
| ACaP03 | 19 | 53802903 | rs1056285 | C | T | . | PASS | .       | inte  | NM_dis  | .       |
| ACaP03 | 20 | 2552806  | rs5584781 | T | A | . | PASS | TMC2    | intrc | NM_     | .       |
| ACaP03 | 20 | 25900162 | rs6037279 | C | A | . | PASS | .       | inte  | NR_dis  | .       |
| ACaP03 | 20 | 34061552 | .         | G | C | . | PASS | CEP25C  | intrc | NM_     | .       |

|        |    |          |           |   |   |   |      |        |                   |
|--------|----|----------|-----------|---|---|---|------|--------|-------------------|
| ACaP03 | 20 | 44657935 | .         | G | A | . | PASS | SLC12A | UTF NM_ NV.       |
| ACaP03 | 21 | 10920253 | rs2013315 | C | T | . | PASS | TPTE   | intrc NM_ .       |
| ACaP03 | 21 | 10920295 | rs2001788 | G | A | . | PASS | TPTE   | intrc NM_ .       |
| ACaP03 | 22 | 46655190 | .         | G | A | . | PASS | PKDRE  | exo  NM_ missens  |
| ACaP03 | X  | 1.53E+08 | .         | G | T | . | PASS | IRAK1  | exo  NM_ stopgair |
| ACaP03 | MT | 8177     | .         | G | A | . | PASS | .      | inte  NO  dis .   |
| ACaP03 | MT | 15761    | .         | G | A | . | PASS | .      | inte  NO  dis .   |
| ACaP04 | 1  | 237272   | rs6263527 | T | A | . | PASS | .      | inte  NR_ dis .   |
| ACaP04 | 1  | 53540057 | .         | C | A | . | PASS | PODN   | intrc NM_ .       |
| ACaP04 | 1  | 1.43E+08 | rs7457471 | C | G | . | PASS | .      | inte  NR_ dis .   |
| ACaP04 | 1  | 1.67E+08 | .         | T | C | . | PASS | POU2F  | intrc NM_ .       |
| ACaP04 | 1  | 2.36E+08 | .         | C | A | . | PASS | NID1   | intrc NM_ .       |
| ACaP04 | 2  | 87580821 | .         | G | C | . | PASS | .      | inte  NR_ dis .   |
| ACaP04 | 2  | 90465003 | rs3711404 | G | A | . | PASS | .      | inte  NR_ dis .   |
| ACaP04 | 2  | 1.82E+08 | .         | A | T | . | PASS | ITGA4  | intrc NM_ .       |
| ACaP04 | 3  | 1.96E+08 | rs7758373 | T | C | . | PASS | SDHAP  | ncR NR_ .         |
| ACaP04 | 4  | 2251695  | .         | T | A | . | PASS | MXD4   | UTF NM_ NV.       |
| ACaP04 | 4  | 49211467 | rs4694947 | T | G | . | PASS | .      | inte  NM_ dis .   |
| ACaP04 | 9  | 73191428 | .         | T | C | . | PASS | TRPM3  | intrc NM_ .       |
| ACaP04 | 10 | 38939588 | rs4070334 | G | A | . | PASS | .      | inte  NR_ dis .   |
| ACaP04 | 12 | 76854256 | rs9213947 | C | A | . | PASS | OSBPL  | intrc NM_ .       |
| ACaP04 | 14 | 50623669 | rs1125033 | G | A | . | PASS | SOS2   | intrc NM_ .       |
| ACaP04 | 14 | 75474251 | .         | A | C | . | PASS | EIF2B2 | intrc NM_ .       |
| ACaP04 | 15 | 20739825 | rs2859043 | G | A | . | PASS | GOLGA  | exo  NM_ missens  |
| ACaP04 | 15 | 23097357 | .         | G | T | . | PASS | LOC28  | ncR NR_ .         |
| ACaP04 | 18 | 31463134 | .         | G | A | . | PASS | NOL4   | intrc NM_ .       |
| ACaP05 | 1  | 1.43E+08 | .         | A | C | . | PASS | .      | inte  NR_ dis .   |
| ACaP05 | 1  | 1.49E+08 | rs2787778 | G | T | . | PASS | .      | inte  NR_ dis .   |
| ACaP05 | 1  | 1.49E+08 | rs2787777 | C | T | . | PASS | .      | inte  NR_ dis .   |
| ACaP05 | 2  | 90465003 | rs3711404 | G | A | . | PASS | .      | inte  NR_ dis .   |
| ACaP05 | 5  | 21751735 | rs1997973 | G | T | . | PASS | CDH12  | UTF NM_ NV.       |
| ACaP05 | 7  | 62956286 | rs2018986 | T | C | . | PASS | .      | inte  NR_ dis .   |
| ACaP05 | 7  | 63219077 | .         | G | T | . | PASS | .      | inte  NR_ dis .   |
| ACaP05 | 7  | 1.02E+08 | rs1390499 | G | C | . | PASS | POLR2  | exo  NM_ missens  |
| ACaP05 | 8  | 7386635  | rs2077351 | A | C | . | PASS | .      | inte  NM_ dis .   |
| ACaP05 | 9  | 66500662 | rs1136487 | C | A | . | PASS | PTGER  | ncR NR_ .         |
| ACaP05 | 9  | 69083093 | rs7648362 | A | G | . | PASS | PGM5P  | ncR NR_ .         |
| ACaP05 | 9  | 74979191 | .         | G | C | . | PASS | ZFAND  | intrc NM_ .       |
| ACaP05 | 10 | 51853633 | rs1995206 | C | T | . | PASS | FAM21  | exo  NM_ missens  |
| ACaP05 | 11 | 135046   | rs3713518 | C | G | . | PASS | .      | inte  NR_ dis .   |
| ACaP05 | 11 | 45927418 | rs8790394 | A | T | . | PASS | MAPK8I | UTF NM_ NV.       |
| ACaP05 | 17 | 21906860 | rs1155611 | C | A | . | PASS | FLJ360 | ncR NR_ .         |
| ACaP05 | 18 | 11610531 | rs2018600 | G | A | . | PASS | SLC35C | exo  NM_ missens  |
| ACaP05 | 21 | 10139726 | .         | G | A | . | PASS | .      | inte  NR_ dis .   |
| ACaP05 | 21 | 10139851 | rs8792017 | A | G | . | PASS | .      | inte  NR_ dis .   |
| ACaP05 | 21 | 11097497 | rs1043983 | A | T | . | PASS | BAGE2  | intrc NM_ .       |
| ACaP05 | X  | 1.39E+08 | rs1444677 | G | C | . | PASS | .      | inte  NM_ dis .   |
| ACaP06 | 1  | 803964   | .         | G | A | . | PASS | FAM41  | ncR NR_ .         |
| ACaP06 | 1  | 5924273  | .         | A | G | . | PASS | NPHP4  | intrc NM_ .       |
| ACaP06 | 1  | 5993482  | .         | C | A | . | PASS | NPHP4  | intrc NM_ .       |
| ACaP06 | 1  | 9662320  | .         | C | T | . | PASS | TMEM2  | exo  NM_ missens  |
| ACaP06 | 1  | 12888733 | .         | C | T | . | PASS | PRAME  | intrc NM_ .       |
| ACaP06 | 1  | 12888735 | .         | G | T | . | PASS | PRAME  | intrc NM_ .       |
| ACaP06 | 1  | 1E+08    | .         | T | G | . | PASS | PALMD  | UTF NM_ NV.       |

|        |   |          |           |   |   |   |      |                    |              |
|--------|---|----------|-----------|---|---|---|------|--------------------|--------------|
| ACaP06 | 1 | 1.43E+08 | rs3894786 | T | C | . | PASS | .                  | inte NR_dis. |
| ACaP06 | 1 | 1.43E+08 | rs1112760 | G | A | . | PASS | .                  | inte NR_dis. |
| ACaP06 | 1 | 1.44E+08 | rs2017985 | G | A | . | PASS | NBPF2C intrc NM_.  | .            |
| ACaP06 | 1 | 1.45E+08 | rs3713084 | T | C | . | PASS | NBPF2C intrc NM_.  | .            |
| ACaP06 | 1 | 1.45E+08 | rs8799710 | G | C | . | PASS | NBPF8, intrc NM_.  | .            |
| ACaP06 | 1 | 1.46E+08 | rs6699421 | A | G | . | PASS | NBPF2f ncR NR_.    | .            |
| ACaP06 | 1 | 1.49E+08 | rs8799669 | C | A | . | PASS | NBPF2f ncR NR_.    | .            |
| ACaP06 | 1 | 1.5E+08  | .         | C | G | . | PASS | OTUD7 exo NM_.     | missens      |
| ACaP06 | 1 | 1.54E+08 | .         | C | G | . | PASS | C1orf18 intrc NM_. | .            |
| ACaP06 | 1 | 1.56E+08 | rs4833528 | C | T | . | PASS | RIT1 exo NM_.      | missens      |
| ACaP06 | 1 | 1.75E+08 | rs8940723 | G | A | . | PASS | RABGA intrc NM_.   | .            |
| ACaP06 | 1 | 1.82E+08 | rs7731705 | C | T | . | PASS | CACNA intrc NM_.   | .            |
| ACaP06 | 2 | 88272597 | .         | G | C | . | PASS | RGPD1 intrc NM_.   | .            |
| ACaP06 | 2 | 89185488 | rs7781962 | G | T | . | PASS | .                  | inte NR_dis. |
| ACaP06 | 2 | 99861764 | rs2018517 | G | A | . | PASS | LYG2 exo NM_.      | synonyr      |
| ACaP06 | 2 | 1.03E+08 | .         | A | C | . | PASS | SLC9A2 exo NM_.    | missens      |
| ACaP06 | 2 | 1.77E+08 | rs7685255 | G | A | . | PASS | EVX2 exo NM_.      | missens      |
| ACaP06 | 2 | 1.81E+08 | rs7551300 | C | T | . | PASS | CWC22 exo NM_.     | missens      |
| ACaP06 | 3 | 39453515 | rs6224264 | A | G | . | PASS | RPSA exo NM_.      | synonyr      |
| ACaP06 | 3 | 1.83E+08 | .         | C | G | . | PASS | ATP11E intrc NM_.  | .            |
| ACaP06 | 3 | 1.84E+08 | .         | G | A | . | PASS | ABCC5 exo NM_.     | synonyr      |
| ACaP06 | 3 | 1.84E+08 | .         | G | A | . | PASS | HTR3C exo NM_.     | missens      |
| ACaP06 | 3 | 1.85E+08 | .         | T | G | . | PASS | VPS8 intrc NM_.    | .            |
| ACaP06 | 4 | 1.09E+08 | .         | C | G | . | PASS | LEF1 intrc NM_.    | .            |
| ACaP06 | 4 | 1.18E+08 | rs5742217 | T | C | . | PASS | .                  | inte NM_dis. |
| ACaP06 | 4 | 1.78E+08 | rs5549088 | G | A | . | PASS | VEGFC exo NM_.     | missens      |
| ACaP06 | 5 | 34180243 | .         | G | A | . | PASS | .                  | inte NR_dis. |
| ACaP06 | 5 | 69206624 | rs3759258 | G | T | . | PASS | .                  | inte NR_dis. |
| ACaP06 | 5 | 71648514 | .         | C | T | . | PASS | PTCD2 exo NM_.     | missens      |
| ACaP06 | 5 | 1.31E+08 | .         | G | C | . | PASS | ACSL6 intrc NM_.   | .            |
| ACaP06 | 5 | 1.32E+08 | .         | G | A | . | PASS | LEAP2 intrc NM_.   | .            |
| ACaP06 | 5 | 1.76E+08 | .         | C | T | . | PASS | EIF4E1f intrc NM_. | .            |
| ACaP06 | 5 | 1.76E+08 | .         | T | G | . | PASS | UNC5A intrc NM_.   | .            |
| ACaP06 | 6 | 13792301 | rs7580301 | C | T | . | PASS | MCUR1 intrc NM_.   | .            |
| ACaP06 | 6 | 15504951 | rs7598672 | G | A | . | PASS | JARID2 intrc NM_.  | .            |
| ACaP06 | 6 | 24667377 | .         | G | A | . | PASS | ACOT1; UTF NM_NM.  | .            |
| ACaP06 | 6 | 29797317 | .         | C | A | . | PASS | HLA-G exo NM_.     | missens      |
| ACaP06 | 6 | 31721280 | .         | G | C | . | PASS | MSH5-ξ ncR NR_.    | .            |
| ACaP06 | 6 | 33137752 | .         | C | T | . | PASS | COL11f intrc NM_.  | .            |
| ACaP06 | 6 | 43196698 | .         | C | T | . | PASS | DNPH1 intrc NM_.   | .            |
| ACaP06 | 6 | 62407056 | .         | A | G | . | PASS | KHDRB intrc NM_.   | .            |
| ACaP06 | 6 | 66013918 | .         | A | T | . | PASS | LOC441 exo NM_.    | missens      |
| ACaP06 | 6 | 1.58E+08 | .         | G | T | . | PASS | SYNJ2 intrc NM_.   | .            |
| ACaP06 | 7 | 1588922  | .         | G | A | . | PASS | TMEM1 intrc NM_.   | .            |
| ACaP06 | 7 | 62956286 | rs2018986 | T | C | . | PASS | .                  | inte NR_dis. |
| ACaP06 | 7 | 87594053 | rs9803140 | C | G | . | PASS | ADAM2; intrc NM_.  | .            |
| ACaP06 | 7 | 1.44E+08 | rs1208357 | G | A | . | PASS | .                  | inte NM_dis. |
| ACaP06 | 7 | 1.44E+08 | rs6248378 | G | A | . | PASS | .                  | inte NM_dis. |
| ACaP06 | 7 | 1.5E+08  | .         | G | A | . | PASS | GIMAP1 exo NM_.    | missens      |
| ACaP06 | 7 | 1.52E+08 | .         | G | A | . | PASS | .                  | inte NR_dis. |
| ACaP06 | 8 | 28695333 | .         | G | A | . | PASS | INTS9 intrc NM_.   | .            |
| ACaP06 | 8 | 43822531 | rs2022368 | A | G | . | PASS | .                  | inte NM_dis. |
| ACaP06 | 8 | 1.45E+08 | .         | T | G | . | PASS | SCRIB intrc NM_.   | .            |
| ACaP06 | 9 | 85863034 | .         | G | C | . | PASS | FRMD3 exo NM_.     | synonyr      |

|        |    |          |           |   |   |   |      |         |       |         |   |          |
|--------|----|----------|-----------|---|---|---|------|---------|-------|---------|---|----------|
| ACaP06 | 9  | 94518550 | .         | C | G | . | PASS | ROR2    | intrc | NM_     | . | .        |
| ACaP06 | 9  | 98908654 | .         | T | C | . | PASS | .       | inte  | NM_dis  | . | .        |
| ACaP06 | 9  | 1.4E+08  | rs7729568 | G | A | . | PASS | MAN1B   | exo   | NM_     | . | synonyr  |
| ACaP06 | 10 | 44869797 | rs5354201 | C | T | . | PASS | CXCL12  | intrc | NM_     | . | .        |
| ACaP06 | 10 | 1.06E+08 | .         | A | T | . | PASS | .       | ups   | NM_     | . | .        |
| ACaP06 | 10 | 1.06E+08 | .         | G | T | . | PASS | CCDC1   | exo   | NM_     | . | stopgair |
| ACaP06 | 10 | 1.19E+08 | .         | C | T | . | PASS | KCNK11  | exo   | NM_     | . | missens  |
| ACaP06 | 11 | 802749   | rs1474222 | G | A | . | PASS | PIDD    | exo   | NM_     | . | synonyr  |
| ACaP06 | 11 | 3394898  | .         | G | C | . | PASS | ZNF195  | UTF   | NM_NM   | . | .        |
| ACaP06 | 11 | 6453188  | .         | G | A | . | PASS | HPX     | exo   | NM_     | . | missens  |
| ACaP06 | 11 | 10440314 | .         | G | A | . | PASS | CAND1   | ncR   | NR_     | . | .        |
| ACaP06 | 11 | 17409674 | rs7776543 | C | T | . | PASS | KCNJ11  | UTF   | NM_NM   | . | .        |
| ACaP06 | 11 | 44956486 | rs7802181 | G | A | . | PASS | TP53I11 | exo   | NM_     | . | synonyr  |
| ACaP06 | 11 | 58962592 | .         | C | G | . | PASS | DTX4    | intrc | NM_     | . | .        |
| ACaP06 | 11 | 65143804 | .         | C | T | . | PASS | SLC25A  | UTF   | NM_NM   | . | .        |
| ACaP06 | 11 | 1.2E+08  | rs1009016 | G | A | . | PASS | TRIM29  | intrc | NM_     | . | .        |
| ACaP06 | 11 | 1.26E+08 | .         | G | A | . | PASS | DDX25   | intrc | NM_     | . | .        |
| ACaP06 | 12 | 57114257 | .         | G | C | . | PASS | NACA    | exo   | NM_     | . | missens  |
| ACaP06 | 12 | 1.13E+08 | rs8683709 | T | C | . | PASS | HECTD   | intrc | NM_     | . | .        |
| ACaP06 | 12 | 1.22E+08 | .         | G | T | . | PASS | KDM2B   | intrc | NM_     | . | .        |
| ACaP06 | 12 | 1.22E+08 | .         | G | T | . | PASS | HPD     | intrc | NM_     | . | .        |
| ACaP06 | 13 | 19956998 | .         | G | A | . | PASS | .       | inte  | NR_dis  | . | .        |
| ACaP06 | 13 | 19957240 | .         | G | A | . | PASS | .       | inte  | NR_dis  | . | .        |
| ACaP06 | 13 | 25373510 | rs7603455 | G | A | . | PASS | RNF17   | intrc | NM_     | . | .        |
| ACaP06 | 13 | 25826058 | .         | G | A | . | PASS | MTMR6   | exo   | NM_     | . | missens  |
| ACaP06 | 13 | 36167439 | .         | A | T | . | PASS | MIR548  | ncR   | NR_     | . | .        |
| ACaP06 | 13 | 39450585 | .         | A | T | . | PASS | FREM2   | intrc | NM_     | . | .        |
| ACaP06 | 13 | 75876520 | rs1847802 | G | A | . | PASS | TBC1D2  | exo   | NM_     | . | stopgair |
| ACaP06 | 14 | 20145911 | rs8674109 | G | T | . | PASS | .       | inte  | NM_dis  | . | .        |
| ACaP06 | 14 | 30095729 | .         | C | T | . | PASS | PRKD1   | exo   | NM_     | . | missens  |
| ACaP06 | 14 | 35183710 | .         | C | T | . | PASS | CFL2    | UTF   | NM_NM   | . | .        |
| ACaP06 | 14 | 45583374 | .         | C | G | . | PASS | PRPF3   | intrc | NM_     | . | .        |
| ACaP06 | 14 | 57949844 | rs7590859 | C | T | . | PASS | C14orf1 | exo   | NM_     | . | missens  |
| ACaP06 | 14 | 63848931 | .         | G | A | . | PASS | PPP2R   | intrc | NM_     | . | .        |
| ACaP06 | 14 | 70714300 | rs1126070 | A | G | . | PASS | ADAM2   | ncR   | NR_     | . | .        |
| ACaP06 | 14 | 1.04E+08 | .         | C | G | . | PASS | TDRD9   | intrc | NM_     | . | .        |
| ACaP06 | 14 | 1.04E+08 | .         | C | T | . | PASS | TDRD9   | intrc | NM_     | . | .        |
| ACaP06 | 14 | 1.04E+08 | .         | C | T | . | PASS | TDRD9   | splc  | NM_NM   | . | .        |
| ACaP06 | 15 | 62547818 | .         | C | T | . | PASS | .       | inte  | NM_dis  | . | .        |
| ACaP06 | 15 | 71433874 | .         | C | A | . | PASS | THSD4   | exo   | NM_     | . | missens  |
| ACaP06 | 16 | 1394469  | .         | G | A | . | PASS | BAIAP3  | splc  | NM_NM   | . | .        |
| ACaP06 | 16 | 1440797  | .         | G | A | . | PASS | UNKL    | intrc | NM_     | . | .        |
| ACaP06 | 16 | 4787945  | rs7488576 | G | A | . | PASS | C16orf7 | exo   | NM_     | . | missens  |
| ACaP06 | 16 | 5080595  | .         | G | C | . | PASS | NAGPA   | intrc | NM_     | . | .        |
| ACaP06 | 16 | 20432607 | .         | G | A | . | PASS | ACSM5   | exo   | NM_     | . | missens  |
| ACaP06 | 16 | 28123150 | .         | G | A | . | PASS | XPO6    | exo   | NM_     | . | missens  |
| ACaP06 | 16 | 30080816 | .         | C | A | . | PASS | ALDOA   | splc  | NM_NM   | . | .        |
| ACaP06 | 16 | 46388298 | rs7501178 | C | T | . | PASS | .       | inte  | NOI_dis | . | .        |
| ACaP06 | 16 | 46393135 | rs2128450 | T | A | . | PASS | .       | inte  | NOI_dis | . | .        |
| ACaP06 | 16 | 46407013 | rs4436803 | T | G | . | PASS | .       | inte  | NOI_dis | . | .        |
| ACaP06 | 16 | 46407752 | rs2887500 | T | G | . | PASS | .       | inte  | NOI_dis | . | .        |
| ACaP06 | 16 | 70867025 | .         | C | A | . | PASS | HYDIN   | intrc | NM_     | . | .        |
| ACaP06 | 16 | 89789052 | .         | T | C | . | PASS | ZNF276  | exo   | NM_     | . | missens  |
| ACaP06 | 17 | 25936412 | .         | G | C | . | PASS | KSR1    | intrc | NM_     | . | .        |



|        |    |          |           |   |   |   |      |           |       |         |         |
|--------|----|----------|-----------|---|---|---|------|-----------|-------|---------|---------|
| ACaP06 | 17 | 28419118 | .         | C | G | . | PASS | EFCAB1    | exon  | NM_     | missens |
| ACaP06 | 17 | 38065416 | .         | G | A | . | PASS | GSDMB     | intrc | NM_     | .       |
| ACaP06 | 17 | 40125572 | rs1996882 | G | T | . | PASS | CNP       | exon  | NM_     | missens |
| ACaP06 | 17 | 40870998 | .         | C | G | . | PASS | EZH1      | intrc | NM_     | .       |
| ACaP06 | 17 | 42945543 | rs1022498 | A | T | . | PASS | EFTUD2    | intrc | NM_     | .       |
| ACaP06 | 17 | 62122809 | .         | C | T | . | PASS | ERN1      | exon  | NM_     | missens |
| ACaP06 | 17 | 65021082 | rs3720728 | C | T | . | PASS | CACNG     | exon  | NM_     | synonym |
| ACaP06 | 17 | 80534231 | .         | G | A | . | PASS | FOXK2     | intrc | NM_     | .       |
| ACaP06 | 18 | 10532779 | .         | G | A | . | PASS | NAPG      | exon  | NM_     | missens |
| ACaP06 | 18 | 12254798 | .         | C | T | . | PASS | CIDEA     | intrc | NM_     | .       |
| ACaP06 | 18 | 14999128 | .         | G | C | . | PASS | .         | inte  | NR_dis  | .       |
| ACaP06 | 18 | 51888195 | rs7558958 | C | T | . | PASS | C18orf5   | exon  | NM_     | missens |
| ACaP06 | 19 | 38573136 | rs9952243 | G | A | . | PASS | SIPA1L1   | exon  | NM_     | missens |
| ACaP06 | 19 | 49100155 | .         | C | T | . | PASS | SULT2E1   | exon  | NM_     | missens |
| ACaP06 | 20 | 13201803 | .         | G | T | . | PASS | .         | ups   | NM_     | .       |
| ACaP06 | 20 | 36952898 | .         | T | G | . | PASS | BPI       | intrc | NM_     | .       |
| ACaP06 | 21 | 10204134 | rs3697472 | C | A | . | PASS | .         | inte  | NR_dis  | .       |
| ACaP06 | 21 | 10204188 | rs7969899 | C | T | . | PASS | .         | inte  | NR_dis  | .       |
| ACaP06 | 21 | 44579674 | .         | C | T | . | PASS | .         | inte  | NM_dis  | .       |
| ACaP06 | 21 | 45479544 | .         | C | G | . | PASS | TRAPP1    | intrc | NM_     | .       |
| ACaP06 | 22 | 16277923 | rs2212142 | T | G | . | PASS | POTEH     | intrc | NM_     | .       |
| ACaP06 | 22 | 20194161 | .         | G | T | . | PASS | LINC00161 | ncR   | NR_     | .       |
| ACaP06 | 22 | 20715963 | rs2015076 | G | C | . | PASS | .         | inte  | NM_dis  | .       |
| ACaP06 | 22 | 37771552 | rs7611606 | G | A | . | PASS | ELFN2     | exon  | NM_     | missens |
| ACaP06 | 22 | 38469859 | .         | T | A | . | PASS | PICK1     | intrc | NM_     | .       |
| ACaP06 | X  | 70636506 | rs3397828 | A | G | . | PASS | BCYRN1    | ncR   | NR_     | .       |
| ACaP06 | X  | 88008631 | .         | C | T | . | PASS | CPXCR1    | exon  | NM_     | synonym |
| ACaP06 | MT | 215      | rs8792192 | A | G | . | PASS | .         | inte  | NON_dis | .       |
| ACaP07 | 1  | 16767275 | .         | G | A | . | PASS | NECAP1    | exon  | NM_     | missens |
| ACaP07 | 1  | 16894795 | rs1996890 | T | C | . | PASS | NBPF1     | intrc | NM_     | .       |
| ACaP07 | 1  | 35370332 | .         | C | A | . | PASS | DLGAP1    | exon  | NM_     | missens |
| ACaP07 | 1  | 1.1E+08  | .         | A | G | . | PASS | GNAI3     | exon  | NM_     | missens |
| ACaP07 | 1  | 1.43E+08 | .         | T | C | . | PASS | .         | inte  | NR_dis  | .       |
| ACaP07 | 1  | 1.43E+08 | rs1694653 | C | G | . | PASS | .         | inte  | NR_dis  | .       |
| ACaP07 | 1  | 1.45E+08 | rs9441133 | T | G | . | PASS | NBPF9     | exon  | NM_     | unknow  |
| ACaP07 | 1  | 1.45E+08 | rs7819708 | C | G | . | PASS | NBPF9     | exon  | NM_     | unknow  |
| ACaP07 | 1  | 1.48E+08 | rs2022445 | T | A | . | PASS | NBPF8     | intrc | NM_     | .       |
| ACaP07 | 1  | 1.5E+08  | .         | C | T | . | PASS | .         | inte  | NM_dis  | .       |
| ACaP07 | 1  | 1.51E+08 | .         | C | T | . | PASS | ANXA9     | intrc | NM_     | .       |
| ACaP07 | 1  | 1.58E+08 | .         | C | G | . | PASS | .         | inte  | NM_dis  | .       |
| ACaP07 | 1  | 1.83E+08 | rs1494980 | T | C | . | PASS | RNASEH1   | exon  | NM_     | missens |
| ACaP07 | 1  | 1.86E+08 | .         | C | A | . | PASS | HMCN1     | exon  | NM_     | missens |
| ACaP07 | 1  | 2.15E+08 | rs7630457 | C | T | . | PASS | CENPF     | exon  | NM_     | missens |
| ACaP07 | 1  | 2.33E+08 | rs3725088 | G | T | . | PASS | KIAA181   | intrc | NM_     | .       |
| ACaP07 | 2  | 42588301 | .         | T | C | . | PASS | COX7A1    | exon  | NM_     | missens |
| ACaP07 | 2  | 91894137 | rs6214568 | A | G | . | PASS | .         | inte  | NR_dis  | .       |
| ACaP07 | 2  | 1.12E+08 | .         | C | G | . | PASS | ACOXL     | intrc | NM_     | .       |
| ACaP07 | 2  | 1.13E+08 | rs1476846 | C | T | . | PASS | ANAPC     | exon  | NM_     | missens |
| ACaP07 | 2  | 2.31E+08 | .         | C | G | . | PASS | SP140L    | intrc | NM_     | .       |
| ACaP07 | 3  | 42907168 | .         | G | A | . | PASS | ACKR2     | UTR   | NM_NV   | .       |
| ACaP07 | 3  | 48692539 | .         | C | A | . | PASS | CELSR3    | exon  | NM_     | missens |
| ACaP07 | 3  | 1.09E+08 | .         | G | T | . | PASS | DPPA2     | intrc | NM_     | .       |
| ACaP07 | 3  | 1.13E+08 | rs1428044 | G | A | . | PASS | SPICE1    | exon  | NM_     | synonym |
| ACaP07 | 3  | 1.55E+08 | .         | T | C | . | PASS | MME       | intrc | NM_     | .       |

|        |    |          |           |   |   |   |      |         |          |              |
|--------|----|----------|-----------|---|---|---|------|---------|----------|--------------|
| ACaP07 | 4  | 49846    | rs4970287 | C | T | . | PASS | .       | inte NON | dis.         |
| ACaP07 | 4  | 1.02E+08 | .         | T | C | . | PASS | PPP3C   | /spli    | NM_NM.       |
| ACaP07 | 4  | 1.06E+08 | .         | G | A | . | PASS | TET2    | exo      | NM_ missens  |
| ACaP07 | 5  | 36976324 | .         | C | T | . | PASS | NIPBL   | exo      | NM_ stopgair |
| ACaP07 | 5  | 1.4E+08  | .         | C | A | . | PASS | SLC4A   | intrc    | NM_ .        |
| ACaP07 | 7  | 37961124 | rs9642790 | C | T | . | PASS | EPDR1   | intrc    | NM_ .        |
| ACaP07 | 7  | 56884371 | rs6246184 | G | A | . | PASS | .       | inte     | NR_ dis.     |
| ACaP07 | 7  | 56887911 | .         | C | A | . | PASS | .       | inte     | NR_ dis.     |
| ACaP07 | 7  | 1E+08    | .         | C | T | . | PASS | LRCH4,  | exo      | NM_ missens  |
| ACaP07 | 7  | 1.22E+08 | .         | C | A | . | PASS | PTPRZ'  | exo      | NM_ missens  |
| ACaP07 | 7  | 1.49E+08 | rs8915428 | C | T | . | PASS | SSPO    | intrc    | NM_ .        |
| ACaP07 | 7  | 1.55E+08 | .         | A | T | . | PASS | PAXIP1  | ncR      | NR_ .        |
| ACaP07 | 8  | 28670032 | .         | G | A | . | PASS | INTS9   | intrc    | NM_ .        |
| ACaP07 | 8  | 37555820 | .         | C | G | . | PASS | ZNF703  | exo      | NM_ missens  |
| ACaP07 | 8  | 67590502 | .         | G | A | . | PASS | C8orf44 | intrc    | NM_ .        |
| ACaP07 | 9  | 5041997  | .         | G | A | . | PASS | JAK2    | intrc    | NM_ .        |
| ACaP07 | 9  | 1.4E+08  | .         | G | A | . | PASS | NDOR1   | intrc    | NM_ .        |
| ACaP07 | 10 | 75563305 | .         | C | G | . | PASS | NDST2   | intrc    | NM_ .        |
| ACaP07 | 10 | 87898673 | .         | G | C | . | PASS | GRID1   | exo      | NM_ missens  |
| ACaP07 | 10 | 1.04E+08 | .         | G | T | . | PASS | NOLC1   | exo      | NM_ synonymr |
| ACaP07 | 10 | 1.05E+08 | .         | G | C | . | PASS | PDCD1   | intrc    | NM_ .        |
| ACaP07 | 10 | 1.35E+08 | .         | G | A | . | PASS | KNDC1   | spli     | NM_NM.       |
| ACaP07 | 11 | 5686420  | .         | C | A | . | PASS | TRIM5   | exo      | NM_ missens  |
| ACaP07 | 11 | 7981551  | .         | T | C | . | PASS | NLRP1   | (exo     | NM_ synonymr |
| ACaP07 | 11 | 30953503 | .         | C | T | . | PASS | DCDC5   | spli     | NM_NM.       |
| ACaP07 | 11 | 36511665 | .         | C | T | . | PASS | TRAF6   | exo      | NM_ missens  |
| ACaP07 | 11 | 94703114 | .         | T | C | . | PASS | CWC15   | intrc    | NM_ .        |
| ACaP07 | 11 | 1.17E+08 | rs7580622 | C | T | . | PASS | DSCAM   | exo      | NM_ synonymr |
| ACaP07 | 12 | 7639196  | .         | A | G | . | PASS | CD163   | exo      | NM_ missens  |
| ACaP07 | 12 | 49725662 | .         | G | A | . | PASS | .       | dow      | NM_ .        |
| ACaP07 | 12 | 50498477 | .         | C | G | . | PASS | GPD1    | exo      | NM_ missens  |
| ACaP07 | 12 | 54757465 | .         | C | T | . | PASS | GPR84   | exo      | NM_ synonymr |
| ACaP07 | 12 | 58014656 | .         | G | C | . | PASS | SLC26A  | intrc    | NM_ .        |
| ACaP07 | 12 | 1.23E+08 | .         | C | A | . | PASS | HCAR3   | exo      | NM_ missens  |
| ACaP07 | 13 | 93518634 | .         | C | A | . | PASS | GPC5    | exo      | NM_ missens  |
| ACaP07 | 14 | 20134633 | rs7149806 | A | G | . | PASS | .       | inte     | NM_ dis.     |
| ACaP07 | 14 | 1.04E+08 | .         | G | T | . | PASS | .       | inte     | NR_ dis.     |
| ACaP07 | 15 | 23931763 | .         | T | G | . | PASS | NDN     | exo      | NM_ missens  |
| ACaP07 | 15 | 30846509 | rs1995696 | A | G | . | PASS | .       | inte     | NM_ dis.     |
| ACaP07 | 15 | 33359832 | .         | G | T | . | PASS | FMN1    | exo      | NM_ missens  |
| ACaP07 | 15 | 57953573 | .         | C | G | . | PASS | GCOM1   | intrc    | NM_ .        |
| ACaP07 | 15 | 72534134 | .         | C | A | . | PASS | PARP6   | intrc    | NM_ .        |
| ACaP07 | 15 | 90346511 | .         | G | C | . | PASS | ANPEP   | exo      | NM_ missens  |
| ACaP07 | 16 | 6069942  | .         | G | A | . | PASS | RBFOX   | UTF      | NM_NM.       |
| ACaP07 | 16 | 75538587 | .         | G | T | . | PASS | .       | inte     | NM_ dis.     |
| ACaP07 | 17 | 10205074 | .         | G | C | . | PASS | MYH13   | intrc    | NM_ .        |
| ACaP07 | 17 | 58092326 | .         | T | C | . | PASS | TBC1D   | ncR      | NR_ .        |
| ACaP07 | 18 | 14629932 | rs8790150 | G | A | . | PASS | .       | inte     | NM_ dis.     |
| ACaP07 | 19 | 3811459  | rs8673654 | T | C | . | PASS | ZFR2    | intrc    | NM_ .        |
| ACaP07 | 19 | 12776320 | rs7668108 | G | A | . | PASS | MAN2B   | exo      | NM_ synonymr |
| ACaP07 | 19 | 18707522 | rs7683037 | G | A | . | PASS | CRLF1   | exo      | NM_ missens  |
| ACaP07 | 19 | 22362334 | .         | T | A | . | PASS | ZNF676  | UTF      | NM_NM.       |
| ACaP07 | 19 | 37383903 | .         | T | G | . | PASS | ZNF829  | intrc    | NM_ .        |
| ACaP07 | 19 | 39098806 | .         | C | T | . | PASS | MAP4K'  | exo      | NM_ synonymr |

|        |    |          |           |   |   |   |      |                   |               |   |
|--------|----|----------|-----------|---|---|---|------|-------------------|---------------|---|
| ACaP07 | 19 | 46320344 | .         | T | G | . | PASS | SYMPK intrc NM_   | .             | . |
| ACaP07 | 19 | 47996617 | .         | G | C | . | PASS | NAPA-A ncR NR_    | .             | . |
| ACaP07 | 19 | 49400716 | .         | C | G | . | PASS | TULP2 intrc NM_   | .             | . |
| ACaP07 | 19 | 49400795 | .         | G | A | . | PASS | TULP2 intrc NM_   | .             | . |
| ACaP07 | 19 | 51107811 | .         | A | G | . | PASS | .                 | ups  NR_      | . |
| ACaP07 | 19 | 56244717 | .         | G | A | . | PASS | NLRP9 exo  NM_    | synonyr       |   |
| ACaP07 | 20 | 42249604 | .         | G | C | . | PASS | IFT52 intrc NM_   | .             | . |
| ACaP07 | 20 | 50407956 | .         | A | G | . | PASS | SALL4 exo  NM_    | missens       |   |
| ACaP07 | 21 | 11186426 | rs1118412 | G | A | . | PASS | .                 | inte  NM_dis  | . |
| ACaP07 | 21 | 28315813 | .         | C | A | . | PASS | ADAMT exo  NM_    | missens       |   |
| ACaP07 | 21 | 33746030 | .         | C | T | . | PASS | URB1 exo  NM_     | missens       |   |
| ACaP07 | 22 | 23029846 | rs2006656 | T | C | . | PASS | .                 | inte  NM_dis  | . |
| ACaP07 | 22 | 44496060 | rs9392199 | G | A | . | PASS | PARVB intrc NM_   | .             | . |
| ACaP07 | X  | 46320101 | rs734038  | T | G | . | PASS | KRBOX intrc NM_   | .             | . |
| ACaP07 | X  | 89368426 | rs1826904 | G | C | . | PASS | .                 | inte  NM_dis  | . |
| ACaP07 | X  | 1.29E+08 | .         | T | A | . | PASS | OCRL exo  NM_     | missens       |   |
| ACaP07 | X  | 1.35E+08 | .         | C | T | . | PASS | GPR112 exo  NM_   | missens       |   |
| ACaP07 | X  | 1.45E+08 | .         | C | A | . | PASS | SLITRK exo  NM_   | missens       |   |
| ACaP07 | X  | 1.54E+08 | .         | G | A | . | PASS | F8 exo  NM_       | missens       |   |
| ACaP07 | MT | 13597    | .         | G | A | . | PASS | .                 | inte  NON dis | . |
| ACaP07 | MT | 15976    | .         | T | C | . | PASS | .                 | inte  NON dis | . |
| ACaP08 | 1  | 16984574 | rs1810443 | G | A | . | PASS | .                 | inte  NR_dis  | . |
| ACaP08 | 1  | 1.43E+08 | rs3698413 | G | A | . | PASS | .                 | inte  NR_dis  | . |
| ACaP08 | 1  | 1.43E+08 | rs3774960 | G | A | . | PASS | .                 | inte  NR_dis  | . |
| ACaP08 | 1  | 1.45E+08 | rs2596327 | T | A | . | PASS | NBPF9 intrc NM_   | .             | . |
| ACaP08 | 1  | 1.48E+08 | rs2020368 | T | A | . | PASS | NBPF8 intrc NM_   | .             | . |
| ACaP08 | 1  | 1.49E+08 | .         | C | A | . | PASS | NBPF25 ncR NR_    | .             | . |
| ACaP08 | 2  | 84816179 | .         | G | C | . | PASS | DNAH6 intrc NM_   | .             | . |
| ACaP08 | 2  | 91777902 | rs2647769 | C | T | . | PASS | .                 | inte  NON dis | . |
| ACaP08 | 2  | 1.05E+08 | .         | C | T | . | PASS | .                 | dow NM_       | . |
| ACaP08 | 2  | 1.13E+08 | .         | C | A | . | PASS | FBLN7 intrc NM_   | .             | . |
| ACaP08 | 2  | 1.13E+08 | .         | C | G | . | PASS | FBLN7 intrc NM_   | .             | . |
| ACaP08 | 2  | 1.31E+08 | rs6216494 | T | A | . | PASS | POTEJ intrc NM_   | .             | . |
| ACaP08 | 3  | 1.42E+08 | .         | G | T | . | PASS | TFDP2 intrc NM_   | .             | . |
| ACaP08 | 4  | 5020763  | .         | C | A | . | PASS | CYTL1 intrc NM_   | .             | . |
| ACaP08 | 4  | 69981142 | rs1429725 | C | T | . | PASS | .                 | inte  NM_dis  | . |
| ACaP08 | 5  | 21491760 | rs2871612 | T | C | . | PASS | GUSBP ncR NR_     | .             | . |
| ACaP08 | 7  | 56898132 | rs6246206 | T | C | . | PASS | .                 | inte  NR_dis  | . |
| ACaP08 | 7  | 65228263 | rs3680944 | T | C | . | PASS | CCT6P' ncR NR_    | .             | . |
| ACaP08 | 8  | 58124209 | rs1499905 | G | C | . | PASS | .                 | inte  NM_dis  | . |
| ACaP08 | 10 | 73570873 | .         | T | A | . | PASS | CDH23 intrc NM_   | .             | . |
| ACaP08 | 10 | 77732782 | rs7710236 | G | A | . | PASS | C10orf1 intrc NM_ | .             | . |
| ACaP08 | 10 | 81317406 | rs1788433 | A | G | . | PASS | SFTPA2 intrc NM_  | .             | . |
| ACaP08 | 10 | 1.24E+08 | .         | T | G | . | PASS | DMBT1 intrc NM_   | .             | . |
| ACaP08 | 11 | 1.25E+08 | .         | T | A | . | PASS | PKNOX intrc NM_   | .             | . |
| ACaP08 | 12 | 9549738  | rs1063873 | T | G | . | PASS | .                 | inte  NR_dis  | . |
| ACaP08 | 14 | 19509337 | rs4247513 | T | C | . | PASS | .                 | inte  NR_dis  | . |
| ACaP08 | 14 | 19720452 | rs7445485 | C | T | . | PASS | .                 | inte  NR_dis  | . |
| ACaP08 | 14 | 20107085 | rs8678279 | G | A | . | PASS | .                 | inte  NM_dis  | . |
| ACaP08 | 14 | 23292000 | .         | A | T | . | PASS | .                 | inte  NM_dis  | . |
| ACaP08 | 17 | 36349252 | rs3930170 | G | T | . | PASS | .                 | ups  NM_      | . |
| ACaP08 | 17 | 48602100 | rs3894278 | A | T | . | PASS | MYCBP intrc NM_   | .             | . |
| ACaP08 | 21 | 9873564  | rs1963041 | G | A | . | PASS | .                 | inte  NR_dis  | . |
| ACaP08 | 22 | 16346025 | rs3716554 | G | T | . | PASS | .                 | inte  NM_dis  | . |

|        |    |          |           |   |   |   |      |         |                     |
|--------|----|----------|-----------|---|---|---|------|---------|---------------------|
| ACaP08 | 22 | 20711723 | .         | C | A | . | PASS | .       | inte  NM_dis .      |
| ACaP08 | X  | 1.35E+08 | rs7819787 | C | A | . | PASS | CT45A1  | UTF NM_NM .         |
| ACaP09 | 1  | 1453062  | .         | T | G | . | PASS | ATAD3f  | intrc NM_ . .       |
| ACaP09 | 1  | 16899903 | rs453347  | G | C | . | PASS | NBPF1   | intrc NM_ . .       |
| ACaP09 | 1  | 45278512 | .         | G | T | . | PASS | BTBD1f  | intrc NM_ . .       |
| ACaP09 | 1  | 1.43E+08 | rs1812127 | C | G | . | PASS | .       | inte  NR_dis .      |
| ACaP09 | 1  | 1.45E+08 | .         | C | G | . | PASS | NOTCH   | intrc NM_ . .       |
| ACaP09 | 1  | 1.45E+08 | rs8799607 | G | T | . | PASS | NBPF2f  | ncR NR_ . .         |
| ACaP09 | 1  | 1.48E+08 | rs1451754 | C | A | . | PASS | NBPF8   | intrc NM_ . .       |
| ACaP09 | 1  | 1.48E+08 | rs2003945 | G | T | . | PASS | NBPF8   | intrc NM_ . .       |
| ACaP09 | 1  | 1.48E+08 | rs7970322 | T | G | . | PASS | NBPF8   | intrc NM_ . .       |
| ACaP09 | 1  | 2.06E+08 | .         | G | T | . | PASS | NUCKS   | intrc NM_ . .       |
| ACaP09 | 2  | 2.43E+08 | rs1996199 | C | T | . | PASS | NEU4    | intrc NM_ . .       |
| ACaP09 | 3  | 48327615 | .         | G | T | . | PASS | .       | inte  NM_dis .      |
| ACaP09 | 3  | 1.7E+08  | rs1873413 | C | T | . | PASS | PRKCI   | intrc NM_ . .       |
| ACaP09 | 3  | 1.95E+08 | rs3723871 | A | G | . | PASS | .       | inte  NM_dis .      |
| ACaP09 | 3  | 1.95E+08 | .         | T | C | . | PASS | MUC20   | intrc NM_ . .       |
| ACaP09 | 3  | 1.96E+08 | rs2006820 | G | A | . | PASS | SDHAP   | ncR NR_ . .         |
| ACaP09 | 4  | 9245235  | .         | T | A | . | PASS | .       | ups  NM_ . .        |
| ACaP09 | 5  | 1.34E+08 | .         | C | A | . | PASS | CAMLG   | UTF NM_NM .         |
| ACaP09 | 6  | 1.6E+08  | .         | C | T | . | PASS | .       | inte  NM_dis .      |
| ACaP09 | 6  | 1.61E+08 | rs7746421 | C | G | . | PASS | LPA     | intrc NM_ . .       |
| ACaP09 | 6  | 1.71E+08 | rs3759780 | G | C | . | PASS | .       | inte  NM_dis .      |
| ACaP09 | 7  | 63215333 | .         | C | G | . | PASS | .       | inte  NR_dis .      |
| ACaP09 | 7  | 63215356 | .         | T | A | . | PASS | .       | inte  NR_dis .      |
| ACaP09 | 7  | 70229814 | .         | T | G | . | PASS | AUTS2   | exo  NM_ . missens  |
| ACaP09 | 9  | 44990618 | rs2803685 | G | T | . | PASS | FAM27f  | ncR NR_ . .         |
| ACaP09 | 10 | 47736243 | rs1996770 | C | T | . | PASS | .       | inte  NM_dis .      |
| ACaP09 | 10 | 47736338 | rs1456597 | C | A | . | PASS | .       | inte  NM_dis .      |
| ACaP09 | 11 | 6459067  | .         | A | C | . | PASS | HPX     | intrc NM_ . .       |
| ACaP09 | 11 | 57281775 | .         | T | C | . | PASS | SLC43A  | intrc NM_ . .       |
| ACaP09 | 12 | 88227    | rs3718339 | T | G | . | PASS | LOC10f  | ncR NR_ . .         |
| ACaP09 | 12 | 89912    | rs3767721 | C | T | . | PASS | LOC10f  | ncR NR_ . .         |
| ACaP09 | 12 | 64838771 | rs5604999 | A | T | . | PASS | XPOT    | intrc NM_ . .       |
| ACaP09 | 14 | 19560932 | rs7755744 | G | A | . | PASS | POTEG   | intrc NM_ . .       |
| ACaP09 | 14 | 20097348 | rs1018908 | C | T | . | PASS | .       | inte  NM_dis .      |
| ACaP09 | 15 | 23436112 | .         | G | A | . | PASS | GOLGA   | ncR NR_ . .         |
| ACaP09 | 15 | 35162992 | rs7568595 | T | C | . | PASS | AQR     | exo  NM_ . synonymr |
| ACaP09 | 16 | 22497030 | rs3739171 | C | T | . | PASS | SMG1P   | ncR NR_ . .         |
| ACaP09 | 16 | 55803763 | rs7137409 | G | A | . | PASS | CES1P1  | ncR NR_ . .         |
| ACaP09 | 17 | 18402736 | rs7124761 | G | A | . | PASS | .       | inte  NM_dis .      |
| ACaP09 | 17 | 21906848 | rs6149181 | G | T | . | PASS | FLJ360f | ncR NR_ . .         |
| ACaP09 | 17 | 58288284 | rs2870408 | T | C | . | PASS | USP32   | intrc NM_ . .       |
| ACaP09 | 17 | 58288310 | rs2848380 | C | T | . | PASS | USP32   | intrc NM_ . .       |
| ACaP09 | 17 | 79977953 | .         | G | C | . | PASS | STRA1f  | intrc NM_ . .       |
| ACaP09 | 18 | 61637184 | .         | C | A | . | PASS | .       | ups  NM_ . .        |
| ACaP09 | 19 | 9043665  | .         | A | G | . | PASS | MUC16   | intrc NM_ . .       |
| ACaP09 | 21 | 9842077  | .         | G | T | . | PASS | .       | inte  NR_dis .      |
| ACaP09 | 22 | 21538112 | .         | A | T | . | PASS | FAM23f  | ncR NR_ . .         |
| ACaP09 | 22 | 42538399 | rs3609392 | C | T | . | PASS | CYP2Df  | ncR NR_ . .         |
| ACaP09 | X  | 57475295 | .         | C | A | . | PASS | FAAH2   | intrc NM_ . .       |
| ACaP10 | 1  | 1290218  | rs7558529 | C | T | . | PASS | MXRA8   | exo  NM_ . missens  |
| ACaP10 | 1  | 1407731  | .         | C | T | . | PASS | ATAD3E  | intrc NM_ . .       |
| ACaP10 | 1  | 36228102 | .         | G | C | . | PASS | CLSPN   | intrc NM_ . .       |

|        |   |          |           |   |   |   |      |        |       |         |          |   |
|--------|---|----------|-----------|---|---|---|------|--------|-------|---------|----------|---|
| ACaP10 | 1 | 36291134 | .         | G | C | . | PASS | AGO4   | intrc | NM_     | .        | . |
| ACaP10 | 1 | 38186581 | .         | C | T | . | PASS | EPHA1C | intrc | NM_     | .        | . |
| ACaP10 | 1 | 41827744 | .         | G | A | . | PASS | .      | inte  | NM_ dis | .        | . |
| ACaP10 | 1 | 41827857 | .         | G | T | . | PASS | .      | inte  | NM_ dis | .        | . |
| ACaP10 | 1 | 87329181 | .         | C | T | . | PASS | 15-Sep | exo   | NM_     | unknow   |   |
| ACaP10 | 1 | 90049401 | .         | C | T | . | PASS | LRRC8f | exo   | NM_     | stopgair |   |
| ACaP10 | 1 | 1.15E+08 | rs1430207 | T | C | . | PASS | SYCP1  | intrc | NM_     | .        | . |
| ACaP10 | 1 | 1.21E+08 | .         | G | A | . | PASS | NOTCH  | intrc | NM_     | .        | . |
| ACaP10 | 1 | 1.43E+08 | rs1996428 | C | T | . | PASS | .      | inte  | NR_ dis | .        | . |
| ACaP10 | 1 | 1.45E+08 | .         | G | C | . | PASS | NBPF9, | intrc | NM_     | .        | . |
| ACaP10 | 1 | 1.45E+08 | rs3755029 | A | T | . | PASS | NBPF2f | ncR   | NR_     | .        | . |
| ACaP10 | 1 | 1.48E+08 | rs2849511 | G | A | . | PASS | LINC01 | ncR   | NR_     | .        | . |
| ACaP10 | 1 | 1.48E+08 | rs7824596 | A | C | . | PASS | NBPF8  | intrc | NM_     | .        | . |
| ACaP10 | 1 | 1.48E+08 | rs3765099 | T | G | . | PASS | NBPF8  | intrc | NM_     | .        | . |
| ACaP10 | 1 | 1.52E+08 | rs9099303 | C | T | . | PASS | TCHH   | exo   | NM_     | missens  |   |
| ACaP10 | 1 | 1.54E+08 | .         | G | C | . | PASS | ATP8B2 | intrc | NM_     | .        | . |
| ACaP10 | 1 | 1.78E+08 | .         | G | A | . | PASS | RASAL2 | intrc | NM_     | .        | . |
| ACaP10 | 1 | 2.04E+08 | .         | A | G | . | PASS | PLEKH7 | intrc | NM_     | .        | . |
| ACaP10 | 1 | 2.07E+08 | .         | C | T | . | PASS | C4BPB  | intrc | NM_     | .        | . |
| ACaP10 | 2 | 1.79E+08 | .         | G | T | . | PASS | TTN    | splie | NM_ NM_ | .        | . |
| ACaP10 | 2 | 2.19E+08 | .         | G | C | . | PASS | TNS1   | intrc | NM_     | .        | . |
| ACaP10 | 3 | 4836817  | rs7793139 | G | A | . | PASS | ITPR1  | exo   | NM_     | missens  |   |
| ACaP10 | 3 | 8983527  | .         | C | T | . | PASS | RAD18  | intrc | NM_     | .        | . |
| ACaP10 | 3 | 13678138 | .         | G | C | . | PASS | FBLN2  | intrc | NM_     | .        | . |
| ACaP10 | 3 | 52529448 | .         | C | T | . | PASS | STAB1  | exo   | NM_     | missens  |   |
| ACaP10 | 4 | 1986605  | rs7785731 | C | T | . | PASS | NELFA  | exo   | NM_     | synonyr  |   |
| ACaP10 | 4 | 88901517 | rs7749410 | G | A | . | PASS | SPP1   | intrc | NM_     | .        | . |
| ACaP10 | 5 | 14652335 | rs2382048 | A | G | . | PASS | .      | inte  | NM_ dis | .        | . |
| ACaP10 | 5 | 79933788 | rs7817278 | C | G | . | PASS | DHFR   | exo   | NM_     | missens  |   |
| ACaP10 | 5 | 1.15E+08 | .         | A | G | . | PASS | COMME  | UTF   | NM_ NM_ | .        | . |
| ACaP10 | 5 | 1.21E+08 | rs1140023 | G | A | . | PASS | ZNF474 | exo   | NM_     | missens  |   |
| ACaP10 | 5 | 1.51E+08 | .         | C | T | . | PASS | SLC36A | intrc | NM_     | .        | . |
| ACaP10 | 5 | 1.61E+08 | .         | G | A | . | PASS | GABRB  | exo   | NM_     | stopgair |   |
| ACaP10 | 6 | 2784638  | .         | G | C | . | PASS | WRNIP  | splie | NM_ NM_ | .        | . |
| ACaP10 | 6 | 31833291 | .         | C | T | . | PASS | SLC44A | exo   | NM_     | missens  |   |
| ACaP10 | 6 | 47220921 | .         | T | C | . | PASS | TNFRSF | intrc | NM_     | .        | . |
| ACaP10 | 6 | 1.29E+08 | rs9907394 | C | T | . | PASS | LAMA2  | intrc | NM_     | .        | . |
| ACaP10 | 6 | 1.58E+08 | .         | G | A | . | PASS | ARID1B | exo   | NM_     | missens  |   |
| ACaP10 | 6 | 1.68E+08 | .         | G | A | . | PASS | MLLT4  | exo   | NM_     | missens  |   |
| ACaP10 | 6 | 1.71E+08 | .         | G | A | . | PASS | TBP    | intrc | NM_     | .        | . |
| ACaP10 | 7 | 2701347  | .         | C | G | . | PASS | TTYH3  | exo   | NM_     | missens  |   |
| ACaP10 | 7 | 6045510  | .         | C | G | . | PASS | PMS2   | intrc | NM_     | .        | . |
| ACaP10 | 7 | 16255796 | rs7468373 | T | C | . | PASS | ISPD   | exo   | NM_     | synonyr  |   |
| ACaP10 | 7 | 43540300 | .         | A | T | . | PASS | HECW1  | exo   | NM_     | missens  |   |
| ACaP10 | 7 | 47622236 | .         | G | A | . | PASS | .      | ups   | NM_     | .        | . |
| ACaP10 | 7 | 1.44E+08 | rs5705914 | T | G | . | PASS | .      | inte  | NM_ dis | .        | . |
| ACaP10 | 7 | 1.5E+08  | rs1481871 | C | T | . | PASS | GIMAP6 | exo   | NM_     | missens  |   |
| ACaP10 | 8 | 1624682  | rs7588073 | G | A | . | PASS | DLGAP2 | intrc | NM_     | .        | . |
| ACaP10 | 8 | 11403517 | rs7479925 | G | A | . | PASS | BLK    | intrc | NM_     | .        | . |
| ACaP10 | 8 | 43828041 | .         | T | G | . | PASS | .      | inte  | NM_ dis | .        | . |
| ACaP10 | 8 | 1.12E+08 | rs5327262 | C | T | . | PASS | .      | inte  | NM_ dis | .        | . |
| ACaP10 | 8 | 1.45E+08 | rs5696070 | G | A | . | PASS | CYC1   | intrc | NM_     | .        | . |
| ACaP10 | 9 | 80144019 | rs3682437 | G | A | . | PASS | GNA14  | exo   | NM_     | missens  |   |
| ACaP10 | 9 | 1.07E+08 | rs3746457 | G | A | . | PASS | OR13C3 | exo   | NM_     | synonyr  |   |

|        |    |          |           |   |   |   |      |         |       |     |          |         |
|--------|----|----------|-----------|---|---|---|------|---------|-------|-----|----------|---------|
| ACaP10 | 9  | 1.31E+08 | rs7528554 | G | A | . | PASS | ZER1    | intrc | NM_ | .        |         |
| ACaP10 | 9  | 1.4E+08  | rs5640471 | G | A | . | PASS | PHPT1   | exo   | NM_ | missens  |         |
| ACaP10 | 9  | 1.41E+08 | rs5505690 | C | T | . | PASS | CACNA   | intrc | NM_ | .        |         |
| ACaP10 | 10 | 1.13E+08 | .         | G | A | . | PASS | RBM20   | exo   | NM_ | missens  |         |
| ACaP10 | 11 | 28332552 | rs7615769 | A | T | . | PASS | METTL1  | intrc | NM_ | .        |         |
| ACaP10 | 11 | 30953473 | .         | C | T | . | PASS | DCDC5   | exo   | NM_ | synonyr  |         |
| ACaP10 | 11 | 46369302 | rs7817387 | C | G | . | PASS | DGKZ    | exo   | NM_ | synonyr  |         |
| ACaP10 | 11 | 62414303 | .         | T | C | . | PASS | .       | ups   | NM_ | .        |         |
| ACaP10 | 11 | 63581174 | rs7525419 | G | A | . | PASS | C11orf8 | exo   | NM_ | missens  |         |
| ACaP10 | 11 | 64976886 | .         | G | C | . | PASS | CAPN1   | intrc | NM_ | .        |         |
| ACaP10 | 11 | 1.34E+08 | .         | G | A | . | PASS | GLB1L2  | intrc | NM_ | .        |         |
| ACaP10 | 12 | 1.14E+08 | .         | C | G | . | PASS | RASAL1  | exo   | NM_ | missens  |         |
| ACaP10 | 12 | 1.22E+08 | rs1409770 | G | A | . | PASS | WDR66   | exo   | NM_ | missens  |         |
| ACaP10 | 13 | 37541814 | .         | T | C | . | PASS | ALG5    | intrc | NM_ | .        |         |
| ACaP10 | 13 | 76445122 | .         | G | T | . | PASS | .       | ups   | NM_ | .        |         |
| ACaP10 | 14 | 19425348 | .         | C | G | . | PASS | .       | inte  | NR_ | dis.     |         |
| ACaP10 | 14 | 52508802 | .         | C | A | . | PASS | NID2    | intrc | NM_ | .        |         |
| ACaP10 | 14 | 68257498 | .         | A | C | . | PASS | ZFYVE2  | intrc | NM_ | .        |         |
| ACaP10 | 14 | 74375999 | .         | C | T | . | PASS | ZNF410  | intrc | NM_ | .        |         |
| ACaP10 | 14 | 74376028 | .         | C | T | . | PASS | ZNF410  | intrc | NM_ | .        |         |
| ACaP10 | 16 | 312533   | rs7663922 | C | T | . | PASS | ITFG3   | exo   | NM_ | missens  |         |
| ACaP10 | 16 | 843324   | rs5750779 | C | T | . | PASS | CHTF1f  | intrc | NM_ | .        |         |
| ACaP10 | 16 | 5046192  | .         | C | T | . | PASS | SEC14L  | intrc | NM_ | .        |         |
| ACaP10 | 16 | 23445193 | .         | T | C | . | PASS | COG7    | intrc | NM_ | .        |         |
| ACaP10 | 16 | 33544403 | rs7569695 | A | G | . | PASS | RNU6-7  | ncR   | NR_ | .        |         |
| ACaP10 | 16 | 33544406 | rs7520038 | G | A | . | PASS | RNU6-7  | ncR   | NR_ | .        |         |
| ACaP10 | 17 | 29171141 | .         | T | C | . | PASS | ATAD5   | intrc | NM_ | .        |         |
| ACaP10 | 17 | 34432681 | rs3713755 | C | T | . | PASS | CCL4    | exo   | NM_ | synonyr  |         |
| ACaP10 | 17 | 38857404 | rs7744485 | C | T | . | PASS | KRT24   | exo   | NM_ | synonyr  |         |
| ACaP10 | 17 | 48538137 | rs7460185 | G | A | . | PASS | ACSF2   | exo   | NM_ | synonyr  |         |
| ACaP10 | 17 | 57719367 | rs8668152 | T | G | . | PASS | CLTC    | intrc | NM_ | .        |         |
| ACaP10 | 17 | 60345769 | rs8665784 | T | G | . | PASS | TBC1D1  | ncR   | NR_ | .        |         |
| ACaP10 | 17 | 75471673 | .         | G | C | . | PASS | .       | 9-Sep | exo | NM_      | missens |
| ACaP10 | 17 | 77758598 | rs1995663 | G | A | . | PASS | CBX2    | exo   | NM_ | synonyr  |         |
| ACaP10 | 17 | 80709957 | .         | G | T | . | PASS | TBCD    | UTF   | NM_ | NM_      |         |
| ACaP10 | 19 | 37784499 | rs3865492 | C | G | . | PASS | .       | inte  | NR_ | dis.     |         |
| ACaP10 | 19 | 37794112 | .         | T | C | . | PASS | .       | inte  | NR_ | dis.     |         |
| ACaP10 | 19 | 42546812 | rs7571526 | G | A | . | PASS | GRIK5   | exo   | NM_ | synonyr  |         |
| ACaP10 | 19 | 45448463 | rs7565559 | G | A | . | PASS | APOC4   | exo   | NM_ | synonyr  |         |
| ACaP10 | 20 | 1559096  | .         | G | A | . | PASS | SIRPB1  | exo   | NM_ | synonyr  |         |
| ACaP10 | 20 | 30231173 | .         | C | T | . | PASS | COX4I2  | intrc | NM_ | .        |         |
| ACaP10 | 20 | 35783518 | rs3774092 | G | A | . | PASS | MROH8   | exo   | NM_ | unknow   |         |
| ACaP10 | 21 | 46841517 | .         | C | A | . | PASS | COL18A1 | ncR   | NR_ | .        |         |
| ACaP10 | 22 | 16290842 | rs6197100 | A | G | . | PASS | .       | inte  | NM_ | dis.     |         |
| ACaP10 | 22 | 21537446 | .         | A | G | . | PASS | FAM23C  | ncR   | NR_ | .        |         |
| ACaP10 | 22 | 25045815 | rs5662423 | G | C | . | PASS | POM12   | ncR   | NR_ | .        |         |
| ACaP10 | 22 | 42761191 | .         | C | G | . | PASS | .       | inte  | NR_ | dis.     |         |
| ACaP10 | 22 | 45603891 | rs1007675 | G | A | . | PASS | KIAA09  | intrc | NM_ | .        |         |
| ACaP10 | X  | 48675681 | .         | G | C | . | PASS | HDAC6   | intrc | NM_ | .        |         |
| ACaP10 | X  | 48976038 | .         | G | A | . | PASS | GPKOV   | intrc | NM_ | .        |         |
| ACaP10 | X  | 49853406 | rs7970448 | C | T | . | PASS | CLCN5   | exo   | NM_ | stopgair |         |
| ACaP10 | X  | 54824610 | .         | A | G | . | PASS | ITIH6   | exo   | NM_ | missens  |         |
| ACaP10 | X  | 1.52E+08 | .         | C | T | . | PASS | CSAG1   | UTF   | NM_ | NM_      |         |
| ACaP11 | 1  | 17092158 | rs4634900 | A | G | . | PASS | .       | inte  | NM_ | dis.     |         |

|        |    |          |           |   |   |   |      |                          |
|--------|----|----------|-----------|---|---|---|------|--------------------------|
| ACaP11 | 1  | 34238488 | .         | G | A | . | PASS | CSMD2 intrc NM_ . .      |
| ACaP11 | 1  | 1.43E+08 | rs7450506 | G | T | . | PASS | . inte  NR_ dis .        |
| ACaP11 | 1  | 1.43E+08 | rs2016919 | T | A | . | PASS | . inte  NR_ dis .        |
| ACaP11 | 1  | 1.43E+08 | .         | A | T | . | PASS | . inte  NR_ dis .        |
| ACaP11 | 1  | 1.43E+08 | rs8662584 | G | T | . | PASS | . inte  NR_ dis .        |
| ACaP11 | 1  | 1.45E+08 | rs4143495 | G | A | . | PASS | NBPF2f ncR NR_ . .       |
| ACaP11 | 1  | 1.48E+08 | rs6181077 | C | T | . | PASS | NBPF8 intrc NM_ . .      |
| ACaP11 | 1  | 1.58E+08 | .         | G | T | . | PASS | CD1D UTF NM_ NM .        |
| ACaP11 | 1  | 2.06E+08 | rs2003501 | G | A | . | PASS | SLC26A intrc NM_ . .     |
| ACaP11 | 2  | 61468669 | .         | G | A | . | PASS | USP34 intrc NM_ . .      |
| ACaP11 | 2  | 71776472 | rs1834895 | C | T | . | PASS | DYSF intrc NM_ . .       |
| ACaP11 | 2  | 71909724 | rs2009908 | C | T | . | PASS | DYSF exo  NM_ missens    |
| ACaP11 | 2  | 74687101 | .         | G | C | . | PASS | WBP1 exo  NM_ missens    |
| ACaP11 | 2  | 98444405 | rs9528    | T | C | . | PASS | TMEM1 intrc NM_ . .      |
| ACaP11 | 2  | 1.5E+08  | .         | A | G | . | PASS | EPC2 UTF NM_ NM .        |
| ACaP11 | 2  | 2.41E+08 | rs3739748 | G | A | . | PASS | GPC1 exo  NM_ missens    |
| ACaP11 | 3  | 27161284 | rs5683253 | C | T | . | PASS | . inte  NM_ dis .        |
| ACaP11 | 3  | 50224219 | rs1474450 | C | T | . | PASS | SEMA3l intrc NM_ . .     |
| ACaP11 | 3  | 52014898 | rs2004359 | G | A | . | PASS | ABHD14 exo  NM_ missens  |
| ACaP11 | 3  | 1.19E+08 | .         | C | T | . | PASS | ARHGA exo  NM_ stopgair  |
| ACaP11 | 4  | 3516405  | .         | T | G | . | PASS | LRPAP1 intrc NM_ . .     |
| ACaP11 | 4  | 6080805  | .         | T | C | . | PASS | JAKMIP intrc NM_ . .     |
| ACaP11 | 4  | 8230040  | .         | G | A | . | PASS | SH3TC' exo  NM_ synonymr |
| ACaP11 | 4  | 41631469 | .         | G | A | . | PASS | LIMCH1 intrc NM_ . .     |
| ACaP11 | 4  | 49165445 | rs2932367 | A | T | . | PASS | . inte  NM_ dis .        |
| ACaP11 | 4  | 49235403 | .         | T | C | . | PASS | . inte  NM_ dis .        |
| ACaP11 | 4  | 53463959 | .         | G | A | . | PASS | USP46 intrc NM_ . .      |
| ACaP11 | 4  | 80328488 | rs7669673 | C | T | . | PASS | GK2 exo  NM_ synonymr    |
| ACaP11 | 5  | 60188960 | .         | C | T | . | PASS | ERCC8 intrc NM_ . .      |
| ACaP11 | 5  | 60628079 | .         | C | A | . | PASS | . ups  NM_ . .           |
| ACaP11 | 5  | 1.02E+08 | .         | G | A | . | PASS | SLCO4( exo  NM_ missens  |
| ACaP11 | 5  | 1.44E+08 | .         | G | A | . | PASS | YIPF5 UTF NM_ NM .       |
| ACaP11 | 5  | 1.49E+08 | rs5319092 | G | A | . | PASS | ABLIM3 UTF NM_ NM .      |
| ACaP11 | 6  | 10926514 | rs5661365 | A | T | . | PASS | SYCP2L intrc NM_ . .     |
| ACaP11 | 6  | 29797493 | .         | C | T | . | PASS | HLA-G intrc NM_ . .      |
| ACaP11 | 6  | 32053837 | .         | C | A | . | PASS | TNXB exo  NM_ synonymr   |
| ACaP11 | 7  | 1539158  | rs1814105 | G | A | . | PASS | INTS1 exo  NM_ synonymr  |
| ACaP11 | 7  | 56870145 | rs7827655 | G | A | . | PASS | . inte  NR_ dis .        |
| ACaP11 | 7  | 87323300 | rs1484992 | G | A | . | PASS | RUNDC intrc NM_ . .      |
| ACaP11 | 7  | 1E+08    | rs5523938 | A | T | . | PASS | EPHB4 intrc NM_ . .      |
| ACaP11 | 7  | 1.37E+08 | .         | G | T | . | PASS | DGKI exo  NM_ synonymr   |
| ACaP11 | 7  | 1.37E+08 | rs3737114 | G | A | . | PASS | DGKI intrc NM_ . .       |
| ACaP11 | 7  | 1.44E+08 | .         | C | T | . | PASS | OR2A2f exo  NM_ synonymr |
| ACaP11 | 8  | 51675009 | rs9982298 | G | A | . | PASS | SNTG1 intrc NM_ . .      |
| ACaP11 | 8  | 92092953 | .         | C | T | . | PASS | OTUD6l exo  NM_ missens  |
| ACaP11 | 9  | 3937164  | .         | G | A | . | PASS | GLIS3 exo  NM_ missens   |
| ACaP11 | 9  | 31254421 | .         | G | A | . | PASS | . inte  NR_ dis .        |
| ACaP11 | 9  | 67334841 | rs9330412 | T | C | . | PASS | . inte  NR_ dis .        |
| ACaP11 | 9  | 95858738 | .         | G | A | . | PASS | C9orf89 intrc NM_ . .    |
| ACaP11 | 9  | 1.16E+08 | .         | C | A | . | PASS | . inte  NM_ dis .        |
| ACaP11 | 9  | 1.39E+08 | rs9459874 | G | A | . | PASS | GPSM1 exo  NM_ missens   |
| ACaP11 | 9  | 1.41E+08 | rs9494422 | C | T | . | PASS | CACNA intrc NM_ . .      |
| ACaP11 | 10 | 25465126 | .         | C | G | . | PASS | GPR15f exo  NM_ missens  |
| ACaP11 | 10 | 38344467 | .         | T | A | . | PASS | ZNF33A exo  NM_ missens  |

|        |    |          |           |   |   |   |      |         |                    |
|--------|----|----------|-----------|---|---|---|------|---------|--------------------|
| ACaP11 | 10 | 49200349 | rs2996811 | G | A | . | PASS | .       | inte NR_dis.       |
| ACaP11 | 10 | 51754214 | .         | G | C | . | PASS | AGAP6   | intrc NM_ . .      |
| ACaP11 | 10 | 97725811 | .         | G | C | . | PASS | ENTPD1  | ncR NR_ . .        |
| ACaP11 | 10 | 99426911 | rs7792060 | G | A | . | PASS | PI4K2A  | intrc NM_ . .      |
| ACaP11 | 11 | 12539367 | .         | T | A | . | PASS | PARVA   | intrc NM_ . .      |
| ACaP11 | 11 | 1.08E+08 | .         | C | A | . | PASS | ATM     | intrc NM_ . .      |
| ACaP11 | 11 | 1.19E+08 | .         | T | G | . | PASS | HYOU1   | exo NM_ . missens  |
| ACaP11 | 11 | 1.34E+08 | .         | T | C | . | PASS | GLB1L2  | intrc NM_ . .      |
| ACaP11 | 12 | 7894149  | .         | T | C | . | PASS | CLEC4E  | intrc NM_ . .      |
| ACaP11 | 12 | 12038881 | .         | G | A | . | PASS | ETV6    | exo NM_ . missens  |
| ACaP11 | 12 | 25398284 | rs1219135 | C | T | . | PASS | KRAS    | exo NM_ . missens  |
| ACaP11 | 12 | 57975211 | rs3522560 | G | A | . | PASS | KIF5A   | exo NM_ . synonymr |
| ACaP11 | 12 | 75435988 | .         | T | A | . | PASS | KCNC2   | UTF NM_NM_ .       |
| ACaP11 | 12 | 1.04E+08 | rs5396169 | G | A | . | PASS | GNN     | ncR NR_ . .        |
| ACaP11 | 13 | 84480908 | .         | G | A | . | PASS | .       | inte NM_dis.       |
| ACaP11 | 14 | 54907897 | .         | C | T | . | PASS | CNIH1   | intrc NM_ . .      |
| ACaP11 | 14 | 99439761 | rs8791962 | G | A | . | PASS | .       | inte NM_dis.       |
| ACaP11 | 15 | 22319705 | .         | G | A | . | PASS | LOC727  | ncR NR_ . .        |
| ACaP11 | 15 | 23931877 | .         | A | G | . | PASS | NDN     | exo NM_ . missens  |
| ACaP11 | 15 | 27128535 | .         | C | T | . | PASS | GABRA   | exo NM_ . missens  |
| ACaP11 | 15 | 32778129 | rs7831577 | A | C | . | PASS | .       | inte NM_dis.       |
| ACaP11 | 15 | 84839208 | rs2010114 | T | A | . | PASS | .       | inte NR_dis.       |
| ACaP11 | 16 | 25266886 | .         | G | A | . | PASS | ZKSCAN1 | intrc NM_ . .      |
| ACaP11 | 16 | 33500640 | .         | T | C | . | PASS | RNU6-7  | ncR NR_ . .        |
| ACaP11 | 16 | 49313530 | .         | C | A | . | PASS | CBLN1   | intrc NM_ . .      |
| ACaP11 | 16 | 70013113 | rs2001829 | A | C | . | PASS | PDXDC   | ncR NR_ . .        |
| ACaP11 | 16 | 81941457 | .         | C | A | . | PASS | PLCG2   | intrc NM_ . .      |
| ACaP11 | 17 | 33353396 | .         | C | T | . | PASS | RFFL    | exo NM_ . synonymr |
| ACaP11 | 17 | 36349253 | .         | C | T | . | PASS | .       | ups NM_ . .        |
| ACaP11 | 17 | 37395078 | .         | C | A | . | PASS | .       | inte NM_dis.       |
| ACaP11 | 17 | 79424399 | .         | C | G | . | PASS | BAHCC   | intrc NM_ . .      |
| ACaP11 | 18 | 61323506 | .         | T | A | . | PASS | SERPIN  | intrc NM_ . .      |
| ACaP11 | 19 | 3811459  | rs8673654 | T | C | . | PASS | ZFR2    | intrc NM_ . .      |
| ACaP11 | 19 | 7935901  | .         | A | T | . | PASS | FLJ2211 | exo NM_ . unknow   |
| ACaP11 | 19 | 11319376 | rs7680686 | C | T | . | PASS | DOCK6   | exo NM_ . missens  |
| ACaP11 | 19 | 36431190 | .         | A | T | . | PASS | LRFN3   | exo NM_ . missens  |
| ACaP11 | 19 | 40025280 | .         | G | A | . | PASS | .       | inte NM_dis.       |
| ACaP11 | 19 | 44635910 | .         | C | T | . | PASS | ZNF225  | exo NM_ . synonymr |
| ACaP11 | 19 | 54818898 | .         | G | A | . | PASS | LILRA5  | intrc NM_ . .      |
| ACaP11 | 19 | 55481747 | .         | G | A | . | PASS | NLRP2   | intrc NM_ . .      |
| ACaP11 | 19 | 58385069 | rs7705940 | G | A | . | PASS | ZNF814  | exo NM_ . synonymr |
| ACaP11 | 20 | 2083840  | .         | G | A | . | PASS | STK35   | exo NM_ . missens  |
| ACaP11 | 20 | 23432566 | rs2002254 | G | A | . | PASS | CST11   | intrc NM_ . .      |
| ACaP11 | 20 | 37581121 | .         | G | T | . | PASS | FAM83C  | exo NM_ . missens  |
| ACaP11 | 20 | 53968515 | .         | C | T | . | PASS | .       | inte NM_dis.       |
| ACaP11 | 21 | 22881344 | .         | T | G | . | PASS | NCAM2   | exo NM_ . missens  |
| ACaP11 | 22 | 33402489 | .         | G | A | . | PASS | SYN3    | exo NM_ . synonymr |
| ACaP11 | X  | 48136636 | .         | C | G | . | PASS | .       | inte NM_dis.       |
| ACaP11 | X  | 1.01E+08 | .         | G | A | . | PASS | ARMCX   | exo NM_ . synonymr |
| ACaP11 | X  | 1.04E+08 | .         | C | T | . | PASS | TEX13A  | exo NM_ . missens  |
| ACaP11 | X  | 1.05E+08 | rs7533837 | C | T | . | PASS | NRK     | exo NM_ . synonymr |
| ACaP11 | X  | 1.23E+08 | .         | C | T | . | PASS | SH2D1   | /intrc NM_ . .     |
| ACaP11 | X  | 1.35E+08 | rs7767123 | C | T | . | PASS | MAP7D1  | /intrc NM_ . .     |
| ACaP11 | X  | 1.45E+08 | .         | C | A | . | PASS | .       | inte NM_dis.       |



|        |    |          |           |   |   |   |      |         |        |       |          |
|--------|----|----------|-----------|---|---|---|------|---------|--------|-------|----------|
| ACaP11 | X  | 1.54E+08 | rs3981235 | G | A | . | PASS | G6PD    | exon   | NM_   | missens  |
| ACaP11 | MT | 12641    | .         | A | G | . | PASS | .       | intron | NON   | dis.     |
| ACaP12 | 1  | 10478868 | .         | C | T | . | PASS | PGD     | intron | NM_   | .        |
| ACaP12 | 1  | 16954895 | rs1015792 | T | C | . | PASS | CROCC   | ncR    | NR_   | .        |
| ACaP12 | 1  | 19176042 | .         | C | T | . | PASS | TAS1R2  | exon   | NM_   | synonym  |
| ACaP12 | 1  | 21945544 | rs1453424 | G | A | . | PASS | RAP1G   | exon   | NM_   | missens  |
| ACaP12 | 1  | 92595302 | .         | G | T | . | PASS | BTBD8   | exon   | NM_   | stopgain |
| ACaP12 | 1  | 1.43E+08 | rs7704066 | T | C | . | PASS | .       | intron | NR_   | dis.     |
| ACaP12 | 1  | 1.43E+08 | rs1415172 | A | G | . | PASS | .       | intron | NR_   | dis.     |
| ACaP12 | 1  | 1.43E+08 | rs1256214 | A | G | . | PASS | .       | intron | NR_   | dis.     |
| ACaP12 | 1  | 1.46E+08 | rs3721624 | C | T | . | PASS | NBPF2   | ncR    | NR_   | .        |
| ACaP12 | 1  | 1.46E+08 | rs5876752 | C | T | . | PASS | NBPF2   | ncR    | NR_   | .        |
| ACaP12 | 1  | 1.49E+08 | .         | A | G | . | PASS | NBPF2   | ncR    | NR_   | .        |
| ACaP12 | 1  | 1.5E+08  | rs3730063 | C | T | . | PASS | CA14    | exon   | NM_   | synonym  |
| ACaP12 | 1  | 1.84E+08 | .         | G | C | . | PASS | NCF2    | intron | NM_   | .        |
| ACaP12 | 1  | 2.11E+08 | .         | C | G | . | PASS | KCNH1   | exon   | NM_   | missens  |
| ACaP12 | 2  | 47748923 | .         | G | A | . | PASS | KCNK12  | exon   | NM_   | missens  |
| ACaP12 | 2  | 90154277 | rs7540104 | G | A | . | PASS | .       | intron | NR_   | dis.     |
| ACaP12 | 2  | 1.55E+08 | .         | G | A | . | PASS | GALNT1  | intron | NM_   | .        |
| ACaP12 | 2  | 1.79E+08 | .         | C | A | . | PASS | MIR548  | ncR    | NR_   | .        |
| ACaP12 | 2  | 1.98E+08 | .         | G | T | . | PASS | HSPD1   | intron | NM_   | .        |
| ACaP12 | 2  | 2.36E+08 | rs9825331 | G | A | . | PASS | SH3BP2  | intron | NM_   | .        |
| ACaP12 | 3  | 4459126  | .         | A | G | . | PASS | SUMF1   | intron | NM_   | .        |
| ACaP12 | 3  | 5025541  | rs1309395 | A | G | . | PASS | BHLHE40 | UTF    | NM_NM | .        |
| ACaP12 | 3  | 32493464 | .         | A | C | . | PASS | CMTM7   | intron | NM_   | .        |
| ACaP12 | 3  | 39142000 | rs3710999 | G | A | . | PASS | GORAS   | intron | NM_   | .        |
| ACaP12 | 3  | 40232079 | .         | G | T | . | PASS | EIF1B-A | ncR    | NR_   | .        |
| ACaP12 | 3  | 49094476 | .         | G | A | . | PASS | QRICH1  | exon   | NM_   | missens  |
| ACaP12 | 3  | 49695410 | .         | G | A | . | PASS | BSN     | exon   | NM_   | synonym  |
| ACaP12 | 3  | 49695411 | .         | G | T | . | PASS | BSN     | exon   | NM_   | missens  |
| ACaP12 | 3  | 50402763 | .         | C | T | . | PASS | CACNA   | intron | NM_   | .        |
| ACaP12 | 3  | 1.14E+08 | .         | T | C | . | PASS | .       | intron | NM_   | dis.     |
| ACaP12 | 3  | 1.26E+08 | rs5729372 | T | C | . | PASS | ALDH1L1 | ncR    | NR_   | .        |
| ACaP12 | 4  | 49846    | rs4970287 | C | T | . | PASS | .       | intron | NON   | dis.     |
| ACaP12 | 4  | 72675845 | rs1456513 | C | T | . | PASS | .       | intron | NM_   | dis.     |
| ACaP12 | 4  | 88056744 | .         | G | A | . | PASS | AFF1    | exon   | NM_   | missens  |
| ACaP12 | 4  | 1.19E+08 | .         | A | G | . | PASS | SNHG8   | ncR    | NR_   | .        |
| ACaP12 | 4  | 1.26E+08 | rs3727861 | C | T | . | PASS | FAT4    | exon   | NM_   | missens  |
| ACaP12 | 4  | 1.74E+08 | .         | C | T | . | PASS | GALNT1  | exon   | NM_   | missens  |
| ACaP12 | 4  | 1.89E+08 | .         | A | G | . | PASS | TRIML2  | intron | NM_   | .        |
| ACaP12 | 5  | 1.49E+08 | .         | G | C | . | PASS | ABLIM3  | UTF    | NM_NM | .        |
| ACaP12 | 5  | 1.56E+08 | .         | C | A | . | PASS | HAVCR   | intron | NM_   | .        |
| ACaP12 | 6  | 29640133 | .         | C | G | . | PASS | MOG     | UTF    | NM_NM | .        |
| ACaP12 | 6  | 38704724 | .         | C | G | . | PASS | DNAH8   | intron | NM_   | .        |
| ACaP12 | 6  | 98472367 | rs9010911 | C | T | . | PASS | .       | ups    | NR_   | .        |
| ACaP12 | 6  | 1.19E+08 | .         | A | T | . | PASS | CEP85L  | intron | NM_   | .        |
| ACaP12 | 7  | 5160948  | rs1544467 | G | C | . | PASS | ZNF890  | ncR    | NR_   | .        |
| ACaP12 | 7  | 6194972  | .         | G | C | . | PASS | USP42   | intron | NM_   | .        |
| ACaP12 | 7  | 23775541 | .         | C | G | . | PASS | STK31   | intron | NM_   | .        |
| ACaP12 | 7  | 27211839 | .         | C | A | . | PASS | HOXA10  | ncR    | NR_   | .        |
| ACaP12 | 7  | 45145116 | .         | T | C | . | PASS | TBRG4   | exon   | NM_   | missens  |
| ACaP12 | 7  | 48886013 | rs1929995 | G | A | . | PASS | .       | intron | NM_   | dis.     |
| ACaP12 | 7  | 66532216 | .         | T | G | . | PASS | TYW1    | intron | NM_   | .        |
| ACaP12 | 7  | 75192365 | .         | G | A | . | PASS | HIP1    | exon   | NM_   | synonym  |

|        |    |          |           |   |   |   |      |         |                   |
|--------|----|----------|-----------|---|---|---|------|---------|-------------------|
| ACaP12 | 7  | 95040962 | .         | T | A | . | PASS | PON2    | splice NM_NV.     |
| ACaP12 | 7  | 98552820 | .         | G | C | . | PASS | TRRAP   | exon NM_ missense |
| ACaP12 | 7  | 1.33E+08 | rs5753233 | C | T | . | PASS | CHCHD   | intron NM_ .      |
| ACaP12 | 7  | 1.35E+08 | .         | G | A | . | PASS | NUP205  | intron NM_ .      |
| ACaP12 | 8  | 47697282 | .         | G | A | . | PASS | .       | intron NON-dis.   |
| ACaP12 | 8  | 71581321 | .         | G | C | . | PASS | LACTB2  | exon NM_ missense |
| ACaP12 | 8  | 73150309 | rs5472481 | T | C | . | PASS | LOC392  | ncR NR_ .         |
| ACaP12 | 8  | 87111441 | .         | G | C | . | PASS | ATP6V   | intron NM_ .      |
| ACaP12 | 9  | 28149024 | rs3746546 | C | T | . | PASS | LINGO2  | intron NM_ .      |
| ACaP12 | 9  | 34372554 | .         | C | T | . | PASS | KIAA111 | exon NM_ unknown  |
| ACaP12 | 9  | 72131055 | .         | C | T | . | PASS | APBA1   | exon NM_ missense |
| ACaP12 | 9  | 78686669 | .         | C | T | . | PASS | PCSK5   | exon NM_ missense |
| ACaP12 | 9  | 1.16E+08 | rs2868900 | G | A | . | PASS | .       | intron NM_dis.    |
| ACaP12 | 9  | 1.17E+08 | rs3719801 | C | T | . | PASS | MIR455  | ncR NR_ .         |
| ACaP12 | 9  | 1.39E+08 | rs9976753 | G | A | . | PASS | CARD9   | intron NM_ .      |
| ACaP12 | 9  | 1.39E+08 | rs3763504 | C | T | . | PASS | SEC16A  | exon NM_ missense |
| ACaP12 | 10 | 3184061  | rs9266937 | C | T | . | PASS | PITRM1  | ncR NR_ .         |
| ACaP12 | 10 | 34624952 | .         | A | T | . | PASS | PARD3   | intron NM_ .      |
| ACaP12 | 10 | 46968906 | .         | A | G | . | PASS | SYT15   | intron NM_ .      |
| ACaP12 | 10 | 75290252 | .         | T | A | . | PASS | USP54   | exon NM_ stopgain |
| ACaP12 | 10 | 94274858 | .         | T | G | . | PASS | IDE     | intron NM_ .      |
| ACaP12 | 10 | 1.29E+08 | .         | A | C | . | PASS | DOCK1   | intron NM_ .      |
| ACaP12 | 11 | 5021198  | .         | A | C | . | PASS | .       | down NM_ .        |
| ACaP12 | 11 | 18057716 | .         | C | T | . | PASS | TPH1    | intron NM_ .      |
| ACaP12 | 11 | 18333062 | .         | T | A | . | PASS | HPS5    | intron NM_ .      |
| ACaP12 | 11 | 55234524 | .         | C | T | . | PASS | .       | intron NM_dis.    |
| ACaP12 | 11 | 57184188 | rs3696017 | C | T | . | PASS | SLC43A  | intron NM_ .      |
| ACaP12 | 11 | 66743255 | .         | C | T | . | PASS | C11orf8 | intron NM_ .      |
| ACaP12 | 11 | 1.07E+08 | .         | G | A | . | PASS | CWF19   | exon NM_ stopgain |
| ACaP12 | 11 | 1.19E+08 | .         | G | A | . | PASS | USP2-A  | ncR NR_ .         |
| ACaP12 | 12 | 48387872 | .         | A | C | . | PASS | COL2A1  | intron NM_ .      |
| ACaP12 | 12 | 1.01E+08 | .         | G | C | . | PASS | DEPDC   | exon NM_ missense |
| ACaP12 | 12 | 1.13E+08 | rs8683709 | T | C | . | PASS | HECTD   | intron NM_ .      |
| ACaP12 | 12 | 1.17E+08 | .         | G | A | . | PASS | MED13L  | intron NM_ .      |
| ACaP12 | 12 | 1.21E+08 | rs5681239 | C | T | . | PASS | HNF1A   | exon NM_ missense |
| ACaP12 | 13 | 99554177 | rs7528858 | C | T | . | PASS | DOCK9   | intron NM_ .      |
| ACaP12 | 14 | 23394231 | .         | T | C | . | PASS | PRMT5   | exon NM_ missense |
| ACaP12 | 14 | 23574113 | rs1288039 | A | G | . | PASS | .       | intron NM_dis.    |
| ACaP12 | 14 | 1.02E+08 | rs5316143 | G | A | . | PASS | .       | ups NR_ .         |
| ACaP12 | 15 | 23931748 | .         | C | G | . | PASS | NDN     | exon NM_ missense |
| ACaP12 | 15 | 30019030 | rs7540721 | C | T | . | PASS | TJP1    | exon NM_ missense |
| ACaP12 | 15 | 30675581 | rs2015691 | A | C | . | PASS | CHRFA   | UTR NM_NV.        |
| ACaP12 | 15 | 30875177 | rs7122570 | C | G | . | PASS | ULK4P1  | ncR NR_ .         |
| ACaP12 | 15 | 34649590 | .         | G | A | . | PASS | NUTM1   | exon NM_ synonymy |
| ACaP12 | 15 | 44828896 | .         | C | T | . | PASS | EIF3J-A | ncR NR_ .         |
| ACaP12 | 15 | 78217260 | rs1869226 | T | A | . | PASS | LOC645  | ncR NR_ .         |
| ACaP12 | 15 | 78217296 | rs8789048 | A | G | . | PASS | LOC645  | ncR NR_ .         |
| ACaP12 | 15 | 78369712 | .         | C | T | . | PASS | TBC1D2  | exon NM_ missense |
| ACaP12 | 15 | 83242000 | .         | A | T | . | PASS | CPEB1   | intron NM_ .      |
| ACaP12 | 16 | 2024786  | rs7655357 | C | T | . | PASS | TBL3    | exon NM_ synonymy |
| ACaP12 | 16 | 3594311  | rs2015706 | G | A | . | PASS | NLRC3   | exon NM_ synonymy |
| ACaP12 | 16 | 5097836  | .         | T | C | . | PASS | C16orf8 | intron NM_ .      |
| ACaP12 | 16 | 71571633 | .         | C | T | . | PASS | CHST4   | exon NM_ synonymy |
| ACaP12 | 17 | 1703092  | .         | C | G | . | PASS | SMYD4   | intron NM_ .      |

|        |    |          |           |   |   |   |      |         |       |     |     |          |
|--------|----|----------|-----------|---|---|---|------|---------|-------|-----|-----|----------|
| ACaP12 | 17 | 3704387  | .         | G | A | . | PASS | ITGAE   | intrc | NM_ | .   | .        |
| ACaP12 | 17 | 5328662  | rs7781206 | T | C | . | PASS | RPAIN   | intrc | NM_ | .   | .        |
| ACaP12 | 17 | 54403491 | .         | C | T | . | PASS | ANKFN   | intrc | NM_ | .   | .        |
| ACaP12 | 17 | 72860511 | rs1134430 | C | T | . | PASS | FDXR    | intrc | NM_ | .   | .        |
| ACaP12 | 17 | 73748472 | .         | G | A | . | PASS | ITGB4   | intrc | NM_ | .   | .        |
| ACaP12 | 17 | 78897302 | rs7648089 | G | A | . | PASS | RPTOR   | exo   | NM_ | .   | synonyr  |
| ACaP12 | 17 | 79804058 | .         | C | T | . | PASS | P4HB    | intrc | NM_ | .   | .        |
| ACaP12 | 17 | 80275317 | rs3729739 | C | T | . | PASS | CD7     | exo   | NM_ | .   | missens  |
| ACaP12 | 17 | 80923509 | .         | C | G | . | PASS | B3GNT1  | intrc | NM_ | .   | .        |
| ACaP12 | 17 | 80923732 | .         | C | G | . | PASS | B3GNT1  | intrc | NM_ | .   | .        |
| ACaP12 | 18 | 671490   | .         | C | T | . | PASS | ENOSF   | UTF   | NM_ | NM_ | .        |
| ACaP12 | 18 | 671523   | .         | C | T | . | PASS | ENOSF   | UTF   | NM_ | NM_ | .        |
| ACaP12 | 18 | 32919698 | .         | A | C | . | PASS | ZNF24   | intrc | NM_ | .   | .        |
| ACaP12 | 19 | 3456537  | rs5282381 | C | T | . | PASS | NFIC    | intrc | NM_ | .   | .        |
| ACaP12 | 19 | 3456645  | .         | G | A | . | PASS | NFIC    | intrc | NM_ | .   | .        |
| ACaP12 | 19 | 3456958  | rs9075262 | G | A | . | PASS | NFIC    | intrc | NM_ | .   | .        |
| ACaP12 | 19 | 3456966  | .         | G | T | . | PASS | NFIC    | intrc | NM_ | .   | .        |
| ACaP12 | 19 | 9722191  | .         | C | A | . | PASS | ZNF561  | intrc | NM_ | .   | .        |
| ACaP12 | 19 | 13925374 | .         | C | T | . | PASS | ZSWIM   | intrc | NM_ | .   | .        |
| ACaP12 | 19 | 38230186 | .         | A | C | . | PASS | ZNF573  | exo   | NM_ | .   | missens  |
| ACaP12 | 19 | 44770644 | .         | C | A | . | PASS | ZNF233  | intrc | NM_ | .   | .        |
| ACaP12 | 19 | 49247486 | .         | G | C | . | PASS | IZUMO1  | intrc | NM_ | .   | .        |
| ACaP12 | 19 | 49254265 | .         | G | A | . | PASS | FUT1    | exo   | NM_ | .   | stopgair |
| ACaP12 | 19 | 49254480 | .         | G | A | . | PASS | FUT1    | exo   | NM_ | .   | missens  |
| ACaP12 | 19 | 51228430 | .         | C | T | . | PASS | CLEC11  | exo   | NM_ | .   | synonyr  |
| ACaP12 | 19 | 53321368 | .         | C | A | . | PASS | ZNF28   | intrc | NM_ | .   | .        |
| ACaP12 | 19 | 54418876 | .         | C | A | . | PASS | CACNG   | intrc | NM_ | .   | .        |
| ACaP12 | 20 | 39987411 | rs7457076 | C | T | . | PASS | LPIN3   | exo   | NM_ | .   | missens  |
| ACaP12 | 21 | 9826941  | .         | G | A | . | PASS | .       | dow   | NR_ | .   | .        |
| ACaP12 | 21 | 10139851 | rs8792017 | A | G | . | PASS | .       | inte  | NR_ | dis | .        |
| ACaP12 | 21 | 10935163 | .         | A | C | . | PASS | TPTE    | intrc | NM_ | .   | .        |
| ACaP12 | 22 | 18121731 | rs1167407 | C | T | . | PASS | BCL2L1  | intrc | NM_ | .   | .        |
| ACaP12 | 22 | 18898908 | rs3760330 | A | G | . | PASS | DGCR6   | intrc | NM_ | .   | .        |
| ACaP12 | 22 | 31487231 | .         | C | T | . | PASS | SMTN    | exo   | NM_ | .   | stopgair |
| ACaP12 | X  | 73811619 | .         | C | T | . | PASS | RLIM    | exo   | NM_ | .   | missens  |
| ACaP12 | X  | 1.39E+08 | .         | G | T | . | PASS | MCF2    | exo   | NM_ | .   | missens  |
| ACaP12 | X  | 1.41E+08 | .         | T | A | . | PASS | MAGEC   | UTF   | NM_ | NM_ | .        |
| ACaP13 | 1  | 1416370  | rs1153096 | T | C | . | PASS | ATAD3E  | intrc | NM_ | .   | .        |
| ACaP13 | 1  | 1960807  | .         | T | G | . | PASS | GABRD   | intrc | NM_ | .   | .        |
| ACaP13 | 1  | 38095397 | .         | G | A | . | PASS | RSPO1   | UTF   | NM_ | NM_ | .        |
| ACaP13 | 1  | 46088944 | rs5317072 | C | T | . | PASS | CCDC1   | exo   | NM_ | .   | synonyr  |
| ACaP13 | 1  | 52761662 | .         | T | A | . | PASS | ZFYVE3  | intrc | NM_ | .   | .        |
| ACaP13 | 1  | 57756744 | rs7787296 | C | T | . | PASS | DAB1    | UTF   | NM_ | NM_ | .        |
| ACaP13 | 1  | 1E+08    | .         | C | T | . | PASS | AGL     | exo   | NM_ | .   | synonyr  |
| ACaP13 | 1  | 1.43E+08 | rs7736232 | A | T | . | PASS | .       | inte  | NR_ | dis | .        |
| ACaP13 | 1  | 1.43E+08 | rs1712174 | A | C | . | PASS | .       | inte  | NR_ | dis | .        |
| ACaP13 | 1  | 1.53E+08 | .         | C | A | . | PASS | LCE2D   | UTF   | NM_ | NM_ | .        |
| ACaP13 | 1  | 1.54E+08 | .         | C | T | . | PASS | UBAP2L  | intrc | NM_ | .   | .        |
| ACaP13 | 1  | 1.61E+08 | .         | C | T | . | PASS | NIT1    | intrc | NM_ | .   | .        |
| ACaP13 | 1  | 1.83E+08 | .         | T | G | . | PASS | LAMC2   | intrc | NM_ | .   | .        |
| ACaP13 | 1  | 1.96E+08 | .         | G | T | . | PASS | KCNT2   | intrc | NM_ | .   | .        |
| ACaP13 | 1  | 1.98E+08 | .         | A | T | . | PASS | C1orf53 | UTF   | NM_ | NM_ | .        |
| ACaP13 | 1  | 2.03E+08 | .         | G | A | . | PASS | KDM5B   | exo   | NM_ | .   | missens  |
| ACaP13 | 1  | 2.44E+08 | .         | G | A | . | PASS | SDCCA   | intrc | NM_ | .   | .        |

|        |   |          |           |   |   |   |      |           |             |          |
|--------|---|----------|-----------|---|---|---|------|-----------|-------------|----------|
| ACaP13 | 2 | 3391528  | .         | C | T | . | PASS | TRAPP1    | exon NM_    | missens  |
| ACaP13 | 2 | 3391529  | .         | C | T | . | PASS | TRAPP1    | exon NM_    | synonym  |
| ACaP13 | 2 | 15467935 | .         | C | A | . | PASS | NBAS      | exon NM_    | missens  |
| ACaP13 | 2 | 32474956 | .         | G | T | . | PASS | NLRC4     | exon NM_    | missens  |
| ACaP13 | 2 | 69300244 | .         | G | A | . | PASS | ANTXR1    | intron NM_  | .        |
| ACaP13 | 2 | 95858692 | rs2015850 | T | C | . | PASS | .         | intron NM_  | dis.     |
| ACaP13 | 2 | 98351736 | .         | A | T | . | PASS | ZAP70     | exon NM_    | missens  |
| ACaP13 | 2 | 1.07E+08 | rs2008974 | G | T | . | PASS | RGPD3     | intron NM_  | .        |
| ACaP13 | 2 | 1.19E+08 | rs7249504 | G | T | . | PASS | INSIG2    | intron NM_  | .        |
| ACaP13 | 2 | 1.19E+08 | .         | A | T | . | PASS | INSIG2    | intron NM_  | .        |
| ACaP13 | 2 | 1.79E+08 | .         | G | A | . | PASS | TTN       | exon NM_    | synonym  |
| ACaP13 | 2 | 2.04E+08 | .         | C | A | . | PASS | ICA1L     | UTR NM_     | NM_      |
| ACaP13 | 2 | 2.04E+08 | rs5520376 | C | T | . | PASS | ABI2      | intron NM_  | .        |
| ACaP13 | 2 | 2.04E+08 | .         | C | G | . | PASS | ABI2      | intron NM_  | .        |
| ACaP13 | 2 | 2.17E+08 | rs1816528 | G | A | . | PASS | LINC00641 | ncR NR_     | .        |
| ACaP13 | 2 | 2.33E+08 | .         | G | A | . | PASS | PRSS5     | exon NM_    | missens  |
| ACaP13 | 3 | 44816983 | .         | C | G | . | PASS | KIF15     | intron NM_  | .        |
| ACaP13 | 3 | 46940375 | rs9185110 | C | G | . | PASS | PTH1R     | intron NM_  | .        |
| ACaP13 | 3 | 52551451 | rs3735896 | C | T | . | PASS | STAB1     | intron NM_  | .        |
| ACaP13 | 3 | 98530296 | .         | T | C | . | PASS | DCBLD2    | intron NM_  | .        |
| ACaP13 | 3 | 98531184 | .         | A | G | . | PASS | DCBLD2    | exon NM_    | missens  |
| ACaP13 | 3 | 1.01E+08 | .         | T | G | . | PASS | RPL24     | intron NM_  | .        |
| ACaP13 | 3 | 1.22E+08 | .         | G | A | . | PASS | ILDR1     | UTR NM_     | NM_      |
| ACaP13 | 3 | 1.3E+08  | rs1456223 | C | T | . | PASS | COL6A3    | exon NM_    | synonym  |
| ACaP13 | 3 | 1.79E+08 | rs1048860 | G | A | . | PASS | PIK3CA    | exon NM_    | missens  |
| ACaP13 | 4 | 3516405  | .         | T | G | . | PASS | LRPAP1    | intron NM_  | .        |
| ACaP13 | 4 | 4158786  | rs4018318 | C | T | . | PASS | .         | intron NR_  | dis.     |
| ACaP13 | 4 | 42466856 | .         | C | T | . | PASS | ATP8A1    | intron NM_  | .        |
| ACaP13 | 4 | 42626770 | .         | G | A | . | PASS | ATP8A1    | intron NM_  | .        |
| ACaP13 | 4 | 74810030 | .         | G | T | . | PASS | .         | intron NM_  | dis.     |
| ACaP13 | 4 | 1.41E+08 | .         | G | C | . | PASS | SCOC      | intron NM_  | .        |
| ACaP13 | 4 | 1.91E+08 | .         | C | G | . | PASS | .         | intron NM_  | dis.     |
| ACaP13 | 5 | 21461937 | .         | C | T | . | PASS | GUSBP     | ncR NR_     | .        |
| ACaP13 | 5 | 54696250 | .         | G | A | . | PASS | SKIV2L    | splice NM_  | NM_      |
| ACaP13 | 5 | 1.2E+08  | .         | G | A | . | PASS | PRR16     | UTR NM_     | NM_      |
| ACaP13 | 5 | 1.31E+08 | .         | A | T | . | PASS | RAPGE     | intron NM_  | .        |
| ACaP13 | 5 | 1.41E+08 | rs7735798 | C | T | . | PASS | PCDHG     | exon NM_    | missens  |
| ACaP13 | 5 | 1.71E+08 | .         | C | T | . | PASS | FGF18     | exon NM_    | synonym  |
| ACaP13 | 5 | 1.79E+08 | .         | G | A | . | PASS | TBC1D9    | exon NM_    | stopgain |
| ACaP13 | 5 | 1.8E+08  | rs3761176 | C | T | . | PASS | BTNL9     | exon NM_    | missens  |
| ACaP13 | 6 | 25279438 | .         | C | T | . | PASS | .         | upsilon NM_ | .        |
| ACaP13 | 6 | 30621054 | rs1419237 | T | G | . | PASS | DHX16     | exon NM_    | missens  |
| ACaP13 | 6 | 1.12E+08 | rs3687466 | C | T | . | PASS | LAMA4     | splice NM_  | NM_      |
| ACaP13 | 6 | 1.5E+08  | .         | G | A | . | PASS | RAET1C    | exon NM_    | synonym  |
| ACaP13 | 6 | 1.54E+08 | .         | G | A | . | PASS | OPRM1     | exon NM_    | synonym  |
| ACaP13 | 6 | 1.56E+08 | rs2014763 | G | A | . | PASS | TIAM2     | exon NM_    | missens  |
| ACaP13 | 6 | 1.71E+08 | rs3759780 | G | C | . | PASS | .         | intron NM_  | dis.     |
| ACaP13 | 7 | 44524932 | rs7676901 | A | G | . | PASS | NUDCD     | intron NM_  | .        |
| ACaP13 | 7 | 44609630 | .         | T | C | . | PASS | DDX56     | exon NM_    | missens  |
| ACaP13 | 7 | 56884371 | rs6246184 | G | A | . | PASS | .         | intron NR_  | dis.     |
| ACaP13 | 7 | 56893786 | rs2013722 | C | T | . | PASS | .         | intron NR_  | dis.     |
| ACaP13 | 7 | 66458446 | .         | C | G | . | PASS | SBDS      | intron NM_  | .        |
| ACaP13 | 7 | 72440173 | .         | C | T | . | PASS | LOC54111  | ncR NR_     | .        |
| ACaP13 | 7 | 1.01E+08 | rs7611895 | G | A | . | PASS | MUC12     | exon NM_    | missens  |

|        |    |          |           |   |   |   |      |         |       |        |   |         |
|--------|----|----------|-----------|---|---|---|------|---------|-------|--------|---|---------|
| ACaP13 | 7  | 1.41E+08 | .         | A | C | . | PASS | KIAA111 | intrc | NM_    | . | .       |
| ACaP13 | 7  | 1.52E+08 | rs1419939 | A | T | . | PASS | KMT2C   | exo   | NM_    | . | synonym |
| ACaP13 | 7  | 1.56E+08 | .         | G | A | . | PASS | .       | inte  | NM_dis | . | .       |
| ACaP13 | 8  | 9593033  | .         | G | A | . | PASS | TNKS    | intrc | NM_    | . | .       |
| ACaP13 | 8  | 12453566 | rs7484521 | C | A | . | PASS | LOC729  | ncR   | NR_    | . | .       |
| ACaP13 | 8  | 21859882 | .         | A | C | . | PASS | XPO7    | intrc | NM_    | . | .       |
| ACaP13 | 8  | 22426860 | .         | T | C | . | PASS | SORBS   | intrc | NM_    | . | .       |
| ACaP13 | 8  | 89131069 | .         | G | A | . | PASS | MMP16   | exo   | NM_    | . | missens |
| ACaP13 | 8  | 1.05E+08 | rs5352633 | G | A | . | PASS | RIMS2   | intrc | NM_    | . | .       |
| ACaP13 | 8  | 1.13E+08 | rs5594625 | A | T | . | PASS | CSMD3   | intrc | NM_    | . | .       |
| ACaP13 | 8  | 1.25E+08 | rs3766154 | C | T | . | PASS | ANXA13  | exo   | NM_    | . | missens |
| ACaP13 | 8  | 1.45E+08 | .         | G | A | . | PASS | CCDC11  | intrc | NM_    | . | .       |
| ACaP13 | 8  | 1.45E+08 | .         | G | A | . | PASS | OPLAH   | exo   | NM_    | . | missens |
| ACaP13 | 9  | 15468835 | .         | G | T | . | PASS | PSIP1   | exo   | NM_    | . | synonym |
| ACaP13 | 9  | 17463175 | .         | T | C | . | PASS | CNTLN   | intrc | NM_    | . | .       |
| ACaP13 | 9  | 44990618 | rs2803685 | G | T | . | PASS | FAM27C  | ncR   | NR_    | . | .       |
| ACaP13 | 9  | 90749743 | rs7553291 | G | A | . | PASS | SPATA3  | exo   | NM_    | . | synonym |
| ACaP13 | 9  | 1.28E+08 | .         | A | G | . | PASS | GAPVD   | exo   | NM_    | . | missens |
| ACaP13 | 10 | 3190592  | rs1901417 | G | A | . | PASS | PITRM1  | ncR   | NR_    | . | .       |
| ACaP13 | 10 | 33196033 | .         | G | T | . | PASS | ITGB1   | exo   | NM_    | . | missens |
| ACaP13 | 10 | 38939588 | rs4070334 | G | A | . | PASS | .       | inte  | NR_dis | . | .       |
| ACaP13 | 10 | 81319598 | .         | C | T | . | PASS | SFTPA2  | intrc | NM_    | . | .       |
| ACaP13 | 10 | 89622388 | .         | G | C | . | PASS | KLLN    | UTF   | NM_NV  | . | .       |
| ACaP13 | 10 | 97824204 | .         | G | A | . | PASS | ENTPD   | ncR   | NR_    | . | .       |
| ACaP13 | 11 | 1024083  | rs7488284 | G | A | . | PASS | MUC6    | exo   | NM_    | . | synonym |
| ACaP13 | 11 | 11952236 | .         | C | T | . | PASS | USP47   | intrc | NM_    | . | .       |
| ACaP13 | 11 | 17416893 | .         | G | A | . | PASS | ABCC8   | intrc | NM_    | . | .       |
| ACaP13 | 11 | 18428563 | .         | T | A | . | PASS | LDHA    | intrc | NM_    | . | .       |
| ACaP13 | 11 | 26559175 | .         | C | T | . | PASS | ANO3    | intrc | NM_    | . | .       |
| ACaP13 | 11 | 28332512 | rs1470918 | G | T | . | PASS | METTL   | intrc | NM_    | . | .       |
| ACaP13 | 11 | 62557597 | .         | A | T | . | PASS | TMEM1   | UTF   | NM_NV  | . | .       |
| ACaP13 | 11 | 63531795 | .         | G | A | . | PASS | C11orf9 | exo   | NM_    | . | missens |
| ACaP13 | 11 | 89510434 | rs2010003 | C | A | . | PASS | .       | inte  | NM_dis | . | .       |
| ACaP13 | 11 | 1.03E+08 | .         | A | T | . | PASS | DYNC2I  | intrc | NM_    | . | .       |
| ACaP13 | 12 | 45270544 | .         | G | C | . | PASS | NELL2   | UTF   | NM_NV  | . | .       |
| ACaP13 | 12 | 51890927 | rs7761498 | A | G | . | PASS | SLC4A8  | intrc | NM_    | . | .       |
| ACaP13 | 12 | 56716439 | .         | G | A | . | PASS | PAN2    | exo   | NM_    | . | missens |
| ACaP13 | 12 | 99145327 | .         | C | G | . | PASS | ANKS1f  | intrc | NM_    | . | .       |
| ACaP13 | 12 | 1.1E+08  | .         | G | A | . | PASS | MMAB    | splic | NM_NV  | . | .       |
| ACaP13 | 13 | 44770472 | .         | C | G | . | PASS | .       | ups   | NR_    | . | .       |
| ACaP13 | 13 | 60849382 | .         | C | A | . | PASS | .       | inte  | NM_dis | . | .       |
| ACaP13 | 13 | 91924856 | .         | G | A | . | PASS | .       | inte  | NR_dis | . | .       |
| ACaP13 | 14 | 19806361 | rs2259899 | C | A | . | PASS | .       | inte  | NR_dis | . | .       |
| ACaP13 | 14 | 20146058 | rs7966403 | C | A | . | PASS | .       | inte  | NM_dis | . | .       |
| ACaP13 | 14 | 23315028 | rs7511166 | C | T | . | PASS | MMP14   | exo   | NM_    | . | missens |
| ACaP13 | 14 | 23874795 | rs1127835 | C | T | . | PASS | MYH6    | intrc | NM_    | . | .       |
| ACaP13 | 14 | 36157747 | .         | C | A | . | PASS | RALGA   | splic | NM_NV  | . | .       |
| ACaP13 | 14 | 1.03E+08 | .         | T | G | . | PASS | CDC42f  | exo   | NM_    | . | missens |
| ACaP13 | 15 | 20487853 | rs7146667 | T | C | . | PASS | .       | ups   | NR_    | . | .       |
| ACaP13 | 15 | 25601103 | .         | T | C | . | PASS | UBE3A   | exo   | NM_    | . | missens |
| ACaP13 | 15 | 29347059 | .         | G | A | . | PASS | APBA2   | intrc | NM_    | . | .       |
| ACaP13 | 15 | 40468780 | .         | G | A | . | PASS | BUB1B   | exo   | NM_    | . | missens |
| ACaP13 | 15 | 76073327 | .         | G | T | . | PASS | .       | inte  | NR_dis | . | .       |
| ACaP13 | 16 | 11051861 | .         | T | C | . | PASS | CLEC1f  | intrc | NM_    | . | .       |

|        |    |          |           |   |   |   |      |        |       |     |     |          |
|--------|----|----------|-----------|---|---|---|------|--------|-------|-----|-----|----------|
| ACaP13 | 16 | 17292440 | .         | A | T | . | PASS | XYLT1  | intrc | NM_ | .   | .        |
| ACaP13 | 16 | 29675597 | .         | C | T | . | PASS | SPN    | exo   | NM_ | .   | missens  |
| ACaP13 | 16 | 31374294 | rs1450253 | C | T | . | PASS | ITGAX  | exo   | NM_ | .   | synonyr  |
| ACaP13 | 16 | 67995561 | .         | C | G | . | PASS | SLC12A | exo   | NM_ | .   | missens  |
| ACaP13 | 16 | 69966926 | rs1135006 | G | A | . | PASS | WWP2   | intrc | NM_ | .   | .        |
| ACaP13 | 17 | 2282453  | rs7673846 | G | A | . | PASS | SGSM2  | exo   | NM_ | .   | missens  |
| ACaP13 | 17 | 9757917  | rs7606360 | C | T | . | PASS | GLP2R  | exo   | NM_ | .   | stopgair |
| ACaP13 | 17 | 10212819 | .         | G | A | . | PASS | MYH13  | intrc | NM_ | .   | .        |
| ACaP13 | 17 | 27031537 | rs5549220 | G | A | . | PASS | PROCA  | intrc | NM_ | .   | .        |
| ACaP13 | 17 | 42988034 | .         | A | G | . | PASS | GFAP   | intrc | NM_ | .   | .        |
| ACaP13 | 17 | 67075243 | .         | G | T | . | PASS | ABCA6  | intrc | NM_ | .   | .        |
| ACaP13 | 17 | 80861278 | rs7400170 | C | T | . | PASS | TBCD   | spl c | NM_ | NM_ | .        |
| ACaP13 | 18 | 14183901 | rs7837587 | T | A | . | PASS | ANKRD  | ncR   | NR_ | .   | .        |
| ACaP13 | 18 | 43328304 | .         | C | G | . | PASS | SLC14A | intrc | NM_ | .   | .        |
| ACaP13 | 18 | 51795778 | .         | G | A | . | PASS | .      | ups   | NM_ | .   | .        |
| ACaP13 | 18 | 57677517 | rs1466769 | G | A | . | PASS | .      | inte  | NM_ | dis | .        |
| ACaP13 | 18 | 65945459 | rs5634889 | C | T | . | PASS | .      | inte  | NR_ | dis | .        |
| ACaP13 | 19 | 1048907  | .         | C | T | . | PASS | ABCA7  | exo   | NM_ | .   | synonyr  |
| ACaP13 | 19 | 8809037  | .         | G | A | . | PASS | ACTL9  | exo   | NM_ | .   | synonyr  |
| ACaP13 | 19 | 12057823 | .         | A | G | . | PASS | ZNF700 | intrc | NM_ | .   | .        |
| ACaP13 | 19 | 14749271 | .         | G | A | . | PASS | EMR3   | intrc | NM_ | .   | .        |
| ACaP13 | 19 | 19971642 | .         | C | G | . | PASS | .      | inte  | NM_ | dis | .        |
| ACaP13 | 19 | 22778387 | .         | G | A | . | PASS | .      | ups   | NR_ | .   | .        |
| ACaP13 | 19 | 22836947 | .         | A | C | . | PASS | ZNF492 | intrc | NM_ | .   | .        |
| ACaP13 | 19 | 36387520 | .         | C | T | . | PASS | NFKBID | intrc | NM_ | .   | .        |
| ACaP13 | 19 | 37785301 | rs7125437 | C | G | . | PASS | .      | inte  | NR_ | dis | .        |
| ACaP13 | 19 | 51646206 | rs1820521 | G | A | . | PASS | SIGLEC | intrc | NM_ | .   | .        |
| ACaP13 | 20 | 3052800  | .         | C | T | . | PASS | OXT    | exo   | NM_ | .   | synonyr  |
| ACaP13 | 20 | 3641469  | .         | G | A | . | PASS | GFRA4  | exo   | NM_ | .   | stopgair |
| ACaP13 | 20 | 8696907  | .         | T | A | . | PASS | PLCB1  | spl c | NM_ | NM_ | .        |
| ACaP13 | 20 | 61050353 | .         | G | A | . | PASS | GATA5  | exo   | NM_ | .   | synonyr  |
| ACaP13 | 21 | 9873828  | rs7964453 | C | G | . | PASS | .      | inte  | NR_ | dis | .        |
| ACaP13 | 21 | 11020702 | rs3735529 | C | A | . | PASS | .      | dow   | NM_ | .   | .        |
| ACaP13 | 21 | 11181987 | rs7280383 | T | C | . | PASS | .      | inte  | NM_ | dis | .        |
| ACaP13 | 21 | 22791110 | .         | G | T | . | PASS | NCAM2  | intrc | NM_ | .   | .        |
| ACaP13 | 21 | 36080332 | rs7738143 | C | T | . | PASS | CLIC6  | exo   | NM_ | .   | synonyr  |
| ACaP13 | 21 | 45432440 | rs5510648 | C | T | . | PASS | TRAPP  | (exo  | NM_ | .   | synonyr  |
| ACaP13 | 21 | 47320950 | .         | G | A | . | PASS | PCBP3  | exo   | NM_ | .   | missens  |
| ACaP13 | 21 | 47419581 | .         | G | A | . | PASS | COL6A1 | exo   | NM_ | .   | missens  |
| ACaP13 | 22 | 16230100 | rs1262847 | G | A | . | PASS | .      | inte  | NR_ | dis | .        |
| ACaP13 | 22 | 22973384 | rs86008   | A | G | . | PASS | .      | dow   | NR_ | .   | .        |
| ACaP13 | 22 | 30783120 | .         | C | A | . | PASS | RNF215 | exo   | NM_ | .   | synonyr  |
| ACaP13 | X  | 10181697 | .         | T | C | . | PASS | CLCN4  | intrc | NM_ | .   | .        |
| ACaP13 | X  | 18189250 | rs7787173 | C | T | . | PASS | BEND2  | exo   | NM_ | .   | missens  |
| ACaP13 | X  | 49962162 | .         | C | T | . | PASS | AKAP4  | intrc | NM_ | .   | .        |
| ACaP13 | X  | 65719566 | .         | C | T | . | PASS | .      | inte  | NM_ | dis | .        |
| ACaP13 | X  | 69898849 | .         | T | C | . | PASS | TEX11  | intrc | NM_ | .   | .        |
| ACaP13 | X  | 70764432 | .         | C | T | . | PASS | OGT    | exo   | NM_ | .   | missens  |
| ACaP13 | X  | 1.01E+08 | .         | G | A | . | PASS | TCEAL6 | intrc | NM_ | .   | .        |
| ACaP13 | X  | 1.01E+08 | .         | C | T | . | PASS | .      | inte  | NM_ | dis | .        |
| ACaP13 | X  | 1.24E+08 | rs9176062 | C | T | . | PASS | .      | inte  | NM_ | dis | .        |
| ACaP13 | X  | 1.51E+08 | rs9279180 | G | A | . | PASS | .      | inte  | NM_ | dis | .        |
| ACaP13 | X  | 1.53E+08 | .         | C | T | . | PASS | IRAK1  | exo   | NM_ | .   | missens  |
| ACaP14 | 1  | 18149614 | rs3718451 | G | A | . | PASS | ACTL8  | exo   | NM_ | .   | synonyr  |

|        |    |          |           |   |   |   |      |         |               |          |
|--------|----|----------|-----------|---|---|---|------|---------|---------------|----------|
| ACaP14 | 1  | 27618712 | .         | T | A | . | PASS | WDTC1   | exon NM_      | stopgain |
| ACaP14 | 1  | 34684254 | rs7678484 | C | T | . | PASS | C1orf94 | intron NM_    | .        |
| ACaP14 | 1  | 35260564 | rs7603609 | G | A | . | PASS | GJA4    | exon NM_      | synonym  |
| ACaP14 | 1  | 44323919 | .         | G | A | . | PASS | ST3GAL1 | intron NM_    | .        |
| ACaP14 | 1  | 45811623 | .         | G | T | . | PASS | TESK2   | exon NM_      | missense |
| ACaP14 | 1  | 64515280 | .         | G | C | . | PASS | ROR1    | intron NM_    | .        |
| ACaP14 | 1  | 65332484 | .         | G | T | . | PASS | JAK1    | intron NM_    | .        |
| ACaP14 | 1  | 1.1E+08  | .         | G | A | . | PASS | AMPD2   | exon NM_      | missense |
| ACaP14 | 1  | 1.12E+08 | rs7547967 | T | G | . | PASS | PIFO    | intron NM_    | .        |
| ACaP14 | 1  | 1.43E+08 | rs7528408 | C | T | . | PASS | .       | intron NR_dis | .        |
| ACaP14 | 1  | 1.45E+08 | rs2009307 | C | T | . | PASS | NBPF2C  | intron NM_    | .        |
| ACaP14 | 1  | 1.45E+08 | rs3726923 | A | G | . | PASS | NBPF2E  | ncR NR_       | .        |
| ACaP14 | 1  | 1.45E+08 | rs8799825 | G | T | . | PASS | NBPF2F  | ncR NR_       | .        |
| ACaP14 | 1  | 2.02E+08 | .         | T | G | . | PASS | PTPN7   | intron NM_    | .        |
| ACaP14 | 1  | 2.28E+08 | rs7756172 | C | T | . | PASS | OBSCN   | intron NM_    | .        |
| ACaP14 | 2  | 1491745  | rs7587514 | C | T | . | PASS | TPO     | exon NM_      | missense |
| ACaP14 | 2  | 1.7E+08  | .         | G | A | . | PASS | LRP2    | UTR NM_NM     | .        |
| ACaP14 | 2  | 1.8E+08  | .         | A | C | . | PASS | MIR548  | ncR NR_       | .        |
| ACaP14 | 2  | 1.97E+08 | rs1411611 | C | T | . | PASS | STK17E  | intron NM_    | .        |
| ACaP14 | 3  | 48677416 | rs1156481 | C | T | . | PASS | CELSR3  | exon NM_      | missense |
| ACaP14 | 3  | 1.12E+08 | .         | A | G | . | PASS | SLC9C1  | intron NM_    | .        |
| ACaP14 | 3  | 1.43E+08 | .         | C | A | . | PASS | PCOLCE  | intron NM_    | .        |
| ACaP14 | 3  | 1.84E+08 | .         | C | T | . | PASS | ABCC5   | exon NM_      | missense |
| ACaP14 | 4  | 628481   | .         | T | A | . | PASS | PDE6B   | exon NM_      | missense |
| ACaP14 | 4  | 875824   | .         | C | T | . | PASS | GAK     | exon NM_      | missense |
| ACaP14 | 4  | 2357633  | rs7307061 | T | C | . | PASS | ZFYVE2  | intron NM_    | .        |
| ACaP14 | 4  | 9245302  | rs8796734 | A | G | . | PASS | .       | upsilon NM_   | .        |
| ACaP14 | 4  | 94128702 | rs7690288 | C | G | . | PASS | GRID2   | intron NM_    | .        |
| ACaP14 | 4  | 1.6E+08  | .         | T | G | . | PASS | RXFP1   | intron NM_    | .        |
| ACaP14 | 4  | 1.68E+08 | rs1003755 | G | A | . | PASS | .       | intron NM_dis | .        |
| ACaP14 | 5  | 9136477  | .         | G | C | . | PASS | SEMA5   | intron NM_    | .        |
| ACaP14 | 5  | 80256656 | .         | G | A | . | PASS | RASGR   | exon NM_      | synonym  |
| ACaP14 | 5  | 1.12E+08 | .         | G | A | . | PASS | APC     | exon NM_      | missense |
| ACaP14 | 5  | 1.41E+08 | .         | G | C | . | PASS | PCDHG   | ncR NR_       | .        |
| ACaP14 | 5  | 1.59E+08 | .         | C | A | . | PASS | EBF1    | intron NM_    | .        |
| ACaP14 | 5  | 1.68E+08 | .         | T | A | . | PASS | WWC1    | exon NM_      | synonym  |
| ACaP14 | 6  | 28295175 | .         | G | T | . | PASS | ZSCAN3  | exon NM_      | missense |
| ACaP14 | 6  | 31138300 | rs7589117 | C | T | . | PASS | POU5F1  | exon NM_      | missense |
| ACaP14 | 6  | 57393271 | .         | T | A | . | PASS | PRIM2   | intron NM_    | .        |
| ACaP14 | 6  | 85472394 | .         | G | A | . | PASS | TBX18   | exon NM_      | missense |
| ACaP14 | 6  | 1.68E+08 | rs441907  | T | C | . | PASS | .       | intron NM_dis | .        |
| ACaP14 | 7  | 83675581 | .         | C | G | . | PASS | SEMA3   | intron NM_    | .        |
| ACaP14 | 7  | 93116217 | .         | G | C | . | PASS | CALCR   | intron NM_    | .        |
| ACaP14 | 7  | 1.13E+08 | .         | C | T | . | PASS | C7orf60 | exon NM_      | synonym  |
| ACaP14 | 8  | 7215692  | .         | A | T | . | PASS | ZNF705  | exon NM_      | missense |
| ACaP14 | 8  | 1.13E+08 | .         | T | C | . | PASS | CSMD3   | exon NM_      | missense |
| ACaP14 | 8  | 1.34E+08 | .         | T | C | . | PASS | NDRG1   | intron NM_    | .        |
| ACaP14 | 9  | 14116261 | .         | G | A | . | PASS | NFIB    | exon NM_      | stopgain |
| ACaP14 | 9  | 1.08E+08 | .         | C | T | . | PASS | FKTN    | exon NM_      | stopgain |
| ACaP14 | 9  | 1.26E+08 | .         | C | T | . | PASS | OR1L6   | exon NM_      | synonym  |
| ACaP14 | 10 | 29770662 | .         | A | C | . | PASS | SVIL    | intron NM_    | .        |
| ACaP14 | 10 | 49200211 | rs3125109 | G | A | . | PASS | .       | intron NR_dis | .        |
| ACaP14 | 10 | 72531001 | .         | G | A | . | PASS | TBATA   | UTR NM_NM     | .        |
| ACaP14 | 10 | 74452957 | rs7905448 | T | A | . | PASS | MCU     | intron NM_    | .        |

|        |    |          |           |   |   |   |      |        |       |         |   |         |
|--------|----|----------|-----------|---|---|---|------|--------|-------|---------|---|---------|
| ACaP14 | 10 | 92678882 | .         | C | A | . | PASS | ANKRD  | intrc | NM_     | . | .       |
| ACaP14 | 10 | 1.12E+08 | rs7646688 | A | G | . | PASS | MXI1   | exo   | NM_     | . | missens |
| ACaP14 | 10 | 1.17E+08 | .         | G | A | . | PASS | ATRNL  | intrc | NM_     | . | .       |
| ACaP14 | 11 | 6588138  | .         | C | T | . | PASS | DNHD1  | exo   | NM_     | . | missens |
| ACaP14 | 11 | 51459427 | .         | C | A | . | PASS | .      | inte  | NM_dis  | . | .       |
| ACaP14 | 11 | 76750853 | rs3775202 | C | T | . | PASS | B3GNT  | exo   | NM_     | . | unknow  |
| ACaP14 | 11 | 89701788 | .         | C | T | . | PASS | TRIM64 | exo   | NM_     | . | synonyr |
| ACaP14 | 11 | 1.08E+08 | rs7690752 | G | A | . | PASS | .      | inte  | NM_dis  | . | .       |
| ACaP14 | 11 | 1.17E+08 | rs7585846 | G | A | . | PASS | SIDT2  | exo   | NM_     | . | missens |
| ACaP14 | 12 | 26809244 | .         | C | T | . | PASS | ITPR2  | exo   | NM_     | . | synonyr |
| ACaP14 | 12 | 49391553 | .         | T | G | . | PASS | DDN    | exo   | NM_     | . | missens |
| ACaP14 | 12 | 54974891 | .         | A | G | . | PASS | PPP1R1 | intrc | NM_     | . | .       |
| ACaP14 | 13 | 28543079 | .         | C | T | . | PASS | CDX2   | exo   | NM_     | . | missens |
| ACaP14 | 14 | 19806361 | rs2259899 | C | A | . | PASS | .      | inte  | NR_dis  | . | .       |
| ACaP14 | 14 | 20132225 | rs2014187 | G | T | . | PASS | .      | inte  | NM_dis  | . | .       |
| ACaP14 | 14 | 69259663 | .         | G | A | . | PASS | ZFP36L | exo   | NM_     | . | missens |
| ACaP14 | 15 | 54793046 | .         | C | G | . | PASS | UNC13C | exo   | NM_     | . | missens |
| ACaP14 | 16 | 1270525  | rs7764738 | C | T | . | PASS | CACNA  | exo   | NM_     | . | missens |
| ACaP14 | 16 | 23702864 | .         | G | C | . | PASS | ERN2   | intrc | NM_     | . | .       |
| ACaP14 | 16 | 74422830 | rs2013540 | C | A | . | PASS | .      | inte  | NR_dis  | . | .       |
| ACaP14 | 18 | 12197920 | rs7502623 | A | C | . | PASS | .      | inte  | NM_dis  | . | .       |
| ACaP14 | 19 | 6963763  | rs7589667 | C | T | . | PASS | EMR4P  | ncR   | NR_     | . | .       |
| ACaP14 | 19 | 10116382 | .         | C | A | . | PASS | COL5A3 | exo   | NM_     | . | missens |
| ACaP14 | 19 | 41285709 | .         | A | T | . | PASS | MIA-RA | ncR   | NR_     | . | .       |
| ACaP14 | 19 | 46521260 | .         | G | T | . | PASS | CCDC6  | intrc | NM_     | . | .       |
| ACaP14 | 19 | 46811870 | .         | G | A | . | PASS | HIF3A  | intrc | NM_     | . | .       |
| ACaP14 | 19 | 56052730 | rs9019919 | G | A | . | PASS | SBK3   | exo   | NM_     | . | missens |
| ACaP14 | 20 | 10036169 | .         | C | G | . | PASS | ANKEF  | exo   | NM_     | . | missens |
| ACaP14 | 20 | 10036179 | rs7770803 | G | C | . | PASS | ANKEF  | exo   | NM_     | . | missens |
| ACaP14 | 20 | 34827993 | rs7792821 | C | T | . | PASS | AAR2   | exo   | NM_     | . | missens |
| ACaP14 | 21 | 34960922 | .         | G | A | . | PASS | DONSO  | exo   | NM_     | . | missens |
| ACaP14 | 22 | 30689936 | .         | C | T | . | PASS | TBC1D1 | exo   | NM_     | . | missens |
| ACaP14 | X  | 20152233 | .         | G | A | . | PASS | EIF1AX | intrc | NM_     | . | .       |
| ACaP14 | X  | 25048192 | .         | G | T | . | PASS | .      | inte  | NM_dis  | . | .       |
| ACaP14 | X  | 47426131 | .         | C | T | . | PASS | ARAF   | exo   | NM_     | . | synonyr |
| ACaP14 | X  | 54011864 | .         | C | A | . | PASS | PHF8   | intrc | NM_     | . | .       |
| ACaP14 | X  | 1.02E+08 | .         | C | G | . | PASS | BEX1   | intrc | NM_     | . | .       |
| ACaP14 | X  | 1.07E+08 | .         | C | T | . | PASS | TSC22E | UTF   | NM_NV   | . | .       |
| ACaP14 | X  | 1.35E+08 | .         | G | C | . | PASS | DDX26E | intrc | NM_     | . | .       |
| ACaP14 | X  | 1.37E+08 | .         | C | T | . | PASS | ZIC3   | exo   | NM_     | . | synonyr |
| ACaP14 | X  | 1.54E+08 | .         | A | G | . | PASS | F8     | intrc | NM_     | . | .       |
| ACaP14 | X  | 1.55E+08 | rs4013617 | G | A | . | PASS | .      | inte  | NM_dis  | . | .       |
| ACaP14 | MT | 11126    | .         | G | A | . | PASS | .      | inte  | NOI_dis | . | .       |



| AAChal  | Genecode  | wgRna | cytc | targ | tfbs        | genomicSt | Repe      | avsnp150  | co        | clinva | gwasCa | 1000g2l | 1000g2l |
|---------|-----------|-------|------|------|-------------|-----------|-----------|-----------|-----------|--------|--------|---------|---------|
| .       | ENST0000. | .     | 1p3. | .    | Score=0.9f. | .         | rs6264213 | ID.       | .         | .      | .      | .       | .       |
| .       | ENST0000. | .     | 1p3. | .    | Score=0.9f. | .         | rs8798212 | ID.       | .         | .      | .      | .       | .       |
| .       | ENST0000. | .     | 1p3. | .    | .           | .         | .         | .         | .         | .      | .      | .       | .       |
| .       | ENST0000. | .     | 1p3. | .    | .           | .         | Score     | rs2011489 | ID.       | .      | .      | .       | .       |
| PTCHC   | ENST0000. | .     | 1p3. | Sc.  | .           | .         | .         | rs7706792 | ID.       | .      | .      | .       | .       |
| .       | ENST0000. | .     | 1p3. | .    | .           | .         | .         | .         | .         | .      | .      | .       | .       |
| .       | ENST0000. | .     | 1p3. | .    | Score=0.9f. | .         | .         | rs7573447 | ID.       | .      | .      | .       | .       |
| .       | ENST0000. | .     | 1p3. | .    | Score=0.9f. | .         | .         | .         | .         | .      | .      | .       | .       |
| .       | ENST0000. | .     | 1p3. | .    | Score=0.9f. | .         | .         | rs643011  | .         | .      | .      | .       | .       |
| .       | .         | .     | 1p3. | .    | Score=0.9f. | .         | .         | rs1891369 | ID.       | .      | .      | .       | .       |
| .       | ENST0000. | .     | 1p3. | .    | .           | .         | .         | Score     | rs7967920 | ID.    | .      | .       | .       |
| .       | ENST0000. | .     | 1p3. | .    | .           | .         | .         | .         | .         | .      | .      | .       | .       |
| .       | ENST0000. | .     | 1p3. | .    | .           | .         | .         | rs3699237 | .         | .      | .      | .       | .       |
| .       | ENST0000. | .     | 1p3. | .    | .           | .         | .         | .         | .         | .      | .      | .       | .       |
| .       | ENST0000. | .     | 1p3. | .    | .           | .         | .         | .         | .         | .      | .      | .       | .       |
| .       | ENST0000. | .     | 1p1. | Sc.  | .           | .         | .         | .         | .         | .      | .      | .       | .       |
| .       | .         | .     | 1p1. | .    | .           | .         | .         | Score.    | .         | .      | .      | .       | .       |
| .       | ENST0000. | .     | 1q2. | .    | Score=0.9f. | .         | .         | rs1809861 | ID.       | .      | .      | .       | .       |
| .       | .         | .     | 1q2. | .    | Score=0.9f. | .         | .         | rs3742168 | ID.       | .      | .      | .       | .       |
| .       | ENST0000. | .     | 1q2. | .    | Score=0.9f. | Score     | rs1409433 | .         | .         | .      | .      | .       | .       |
| .       | ENST0000. | .     | 1q2. | .    | Score=0.9f. | .         | .         | rs7967822 | ID.       | .      | .      | .       | .       |
| .       | ENST0000. | .     | 1q2. | .    | Score=0.9f. | .         | .         | rs7763460 | ID.       | .      | .      | .       | .       |
| .       | .         | .     | 1q2. | .    | Score=0.9f. | .         | .         | .         | .         | .      | .      | .       | .       |
| .       | ENST0000. | .     | 1q2. | .    | Score=0.9f. | .         | .         | rs1694653 | .         | .      | .      | .       | .       |
| .       | ENST0000. | .     | 1q2. | .    | Score=0.9f. | .         | .         | rs1129555 | ID.       | .      | .      | .       | .       |
| .       | .         | .     | 1q2. | .    | Score=0.9f. | Score     | rs3732644 | .         | .         | .      | .      | .       | 0.023   |
| PDE4D   | ENST0000. | .     | 1q2. | Sc   | Score=0.9f. | .         | .         | .         | .         | .      | .      | .       | .       |
| .       | ENST0000. | .     | 1q2. | .    | Score=0.9f. | Score     | rs2691756 | .         | .         | .      | .      | .       | .       |
| .       | ENST0000. | .     | 1q2. | .    | Score=0.9f. | .         | .         | .         | .         | .      | .      | .       | .       |
| .       | ENST0000. | .     | 1q2. | .    | Score=0.9f. | .         | .         | ID.       | .         | .      | .      | .       | .       |
| .       | ENST0000. | .     | 1q2. | .    | Score=0.9f. | .         | .         | ID.       | .         | .      | .      | .       | .       |
| .       | ENST0000. | .     | 1q2. | .    | .           | .         | .         | rs1932337 | .         | .      | .      | .       | .       |
| .       | ENST0000. | .     | 1q2. | .    | Score=0.9f. | .         | .         | .         | .         | .      | .      | .       | .       |
| .       | ENST0000. | .     | 1q2. | .    | Score=0.9f. | .         | .         | rs2837929 | ID.       | .      | .      | .       | .       |
| .       | ENST0000. | .     | 1q2. | .    | Score=0.9f. | .         | .         | rs2983273 | ID.       | .      | .      | .       | 0.002   |
| PGLYR   | ENST0000. | .     | 1q2. | .    | .           | .         | .         | rs3740307 | ID.       | .      | .      | .       | .       |
| .       | ENST0000. | .     | 1q2. | .    | Score=0.9f. | Score     | rs1674785 | ID.       | .         | .      | .      | .       | 0.672   |
| FCGR2   | ENST0000. | .     | 1q2. | .    | Score=0.9f. | .         | .         | rs1485348 | .         | .      | .      | .       | .       |
| POU2F   | ENST0000. | .     | 1q2. | Sc.  | .           | .         | .         | rs7598068 | .         | .      | .      | .       | .       |
| .       | ENST0000. | .     | 1q3. | .    | .           | .         | .         | .         | .         | .      | .      | .       | .       |
| .       | ENST0000. | .     | 1q4. | .    | .           | .         | .         | Score.    | .         | .      | .      | .       | .       |
| .       | ENST0000. | .     | 1q4. | .    | .           | .         | .         | .         | .         | .      | .      | .       | .       |
| CEP17l  | ENST0000. | .     | 1q4. | Sc   | Score=0.9f. | .         | .         | rs2006447 | ID.       | .      | .      | .       | .       |
| .       | .         | .     | 1q4. | .    | Score=0.9f. | .         | .         | rs3739868 | ID.       | .      | .      | .       | .       |
| .       | .         | .     | 1q4. | .    | Score=0.9f. | .         | .         | rs1782199 | ID.       | .      | .      | .       | .       |
| .       | .         | .     | 2p1. | .    | .           | .         | .         | Score     | rs3461159 | ID.    | .      | .       | 0.005   |
| .       | .         | .     | 2p1. | .    | Score=0.9f. | Score     | rs8689209 | ID.       | .         | .      | .      | .       | .       |
| .       | ENST0000. | .     | 2p1. | .    | Score=0.9f. | Score.    | .         | .         | .         | .      | .      | .       | .       |
| IL1R1:† | ENST0000. | .     | 2q1. | .    | .           | .         | .         | .         | .         | .      | .      | .       | .       |
| .       | ENST0000. | .     | 2q1. | .    | Score=0.9f. | Score     | rs3877497 | ID.       | .         | .      | .      | .       | .       |

|                   |      |     |           |                     |        |   |   |       |
|-------------------|------|-----|-----------|---------------------|--------|---|---|-------|
| . ENST0000.       | 2q1. | .   | .         | Score rs1037863.    | .      | . | . | .     |
| POTEF ENST0000.   | 2q2. | .   | Score=0.9 | rs1839843 ID.       | .      | . | . | 0.688 |
| POTEF ENST0000.   | 2q2. | .   | Score=0.9 | ID.                 | .      | . | . | .     |
| . ENST0000.       | 2q2. | .   | .         | .                   | .      | . | . | .     |
| ZEB2:1 ENST0000.  | 2q2. | Sc. | .         | .                   | .      | . | . | .     |
| . ENST0000.       | 2q3. | .   | .         | .                   | .      | . | . | .     |
| MARS2 ENST0000.   | 2q3. | .   | .         | .                   | .      | . | . | .     |
| PLEKH ENST0000.   | 2q3. | Sc. | .         | .                   | .      | . | . | .     |
| . ENST0000.       | 2q3. | .   | .         | rs7812258.          | .      | . | . | .     |
| . ENST0000.       | 2q3. | .   | .         | rs1010785 ID.       | .      | . | . | .     |
| . ENST0000.       | 2q3. | .   | .         | rs7526847.          | .      | . | . | .     |
| . ENST0000.       | 3p2. | .   | .         | .                   | .      | . | . | .     |
| . ENST0000.       | 3p2. | .   | .         | .                   | .      | . | . | .     |
| KAT2B ENST0000.   | 3p2. | .   | .         | .                   | .      | . | . | .     |
| . ENST0000.       | 3p2. | .   | .         | .                   | .      | . | . | .     |
| SCN10 ENST0000.   | 3p2. | .   | .         | rs1450320.          | Uncer. | . | . | .     |
| SCN10 ENST0000.   | 3p2. | .   | .         | rs1398610.          | Uncer. | . | . | .     |
| PDZRN ENST0000.   | 3p1. | Sc. | .         | ID.                 | .      | . | . | .     |
| OR5H1 ENST0000.   | 3q1. | Sc  | Score=0.8 | rs1126455 ID.       | .      | . | . | 0.001 |
| . ENST0000.       | 3q1. | .   | .         | .                   | .      | . | . | .     |
| . ENST0000.       | 3q1. | .   | .         | rs7541975.          | .      | . | . | .     |
| IFT57:1 ENST0000. | 3q1. | .   | .         | rs3757741.          | .      | . | . | .     |
| . ENST0000.       | 3q2. | .   | .         | ID.                 | .      | . | . | .     |
| . ENST0000.       | 3q2. | .   | Score=0.9 | rs6228513 ID.       | .      | . | . | .     |
| . .               | 3q2. | .   | Score=0.9 | Score.              | .      | . | . | .     |
| . ENST0000.       | 4p1. | .   | .         | rs4970287 ID.       | .      | . | . | .     |
| . ENST0000.       | 4q2. | .   | .         | .                   | .      | . | . | .     |
| . .               | 4q2. | .   | .         | Score rs3764069.    | .      | . | . | .     |
| . .               | 4q2. | .   | Score=0.9 | Score rs7963572.    | .      | . | . | .     |
| FREM3 ENST0000.   | 4q3. | .   | .         | rs9542709 ID.       | .      | . | . | .     |
| . ENST0000.       | 4q3. | .   | .         | rs3721454.          | .      | . | . | .     |
| TRIML ENST0000.   | 4q3. | .   | .         | ID.                 | .      | . | . | .     |
| . ENST0000.       | 5p1. | .   | Score=0.9 | Score rs649883.     | .      | . | . | .     |
| . ENST0000.       | 5p1. | .   | Score=0.9 | Score rs1467072.    | .      | . | . | .     |
| . ENST0000.       | 5p1. | .   | .         | .                   | .      | . | . | .     |
| . ENST0000.       | 5p1. | .   | Score=0.9 | Score rs1500138 ID. | .      | . | . | .     |
| . ENST0000.       | 5p1. | .   | .         | .                   | .      | . | . | .     |
| . ENST0000.       | 5q1. | .   | Score=0.9 | rs7962294 ID.       | .      | . | . | .     |
| . ENST0000.       | 5q1. | .   | Score=0.9 | .                   | .      | . | . | .     |
| . ENST0000.       | 5q2. | .   | .         | .                   | .      | . | . | .     |
| CAMK4 ENST0000.   | 5q2. | .   | .         | rs7609290.          | .      | . | . | .     |
| . ENST0000.       | 5q3. | .   | .         | .                   | .      | . | . | .     |
| PCDHC ENST0000.   | 5q3. | .   | .         | rs7647428.          | .      | . | . | .     |
| . ENST0000.       | 5q3. | .   | Score=0.9 | Score rs1407436 ID. | .      | . | . | .     |
| . ENST0000.       | 5q3. | .   | Score=0.9 | rs7380674.          | .      | . | . | .     |
| . ENST0000.       | 6p2. | .   | .         | rs5568001.          | .      | . | . | 0.001 |
| GSTA1 ENST0000.   | 6p1. | .   | Score=0.9 | rs3977792.          | .      | . | . | .     |
| . ENST0000.       | 6p1. | .   | Score=0.9 | .                   | .      | . | . | .     |
| PHIP:1 ENST0000.  | 6q1. | .   | .         | .                   | .      | . | . | .     |
| . ENST0000.       | 6q1. | .   | Score=0.9 | rs9844362.          | .      | . | . | .     |
| . ENST0000.       | 6q1. | .   | Score=0.9 | .                   | .      | . | . | .     |
| . ENST0000.       | 6q2. | .   | .         | Score rs9992807.    | .      | . | . | .     |
| ARMC2 ENST0000.   | 6q2. | .   | .         | .                   | .      | . | . | .     |
| SLC2A ENST0000.   | 6q2. | .   | .         | rs7554849.          | .      | . | . | .     |

|                   |      |     |            |                     |   |   |   |   |       |
|-------------------|------|-----|------------|---------------------|---|---|---|---|-------|
| . ENST0000.       | 6q2. | .   | .          | .                   | . | . | . | . | .     |
| ADGB: ENST0000.   | 6q2. | .   | .          | rs7747387.          | . | . | . | . | .     |
| . ENST0000.       | 6q2. | .   | Score=0.92 | Score rs1467177 ID. | . | . | . | . | .     |
| . ENST0000.       | 7p2. | .   | .          | .                   | . | . | . | . | .     |
| . ENST0000.       | 7p2. | .   | .          | Score rs7308136 ID. | . | . | . | . | .     |
| . ENST0000.       | 7p1. | .   | .          | .                   | . | . | . | . | .     |
| . ENST0000.       | 7p1. | .   | Score=0.91 | .                   | . | . | . | . | .     |
| . ENST0000.       | 7p1. | .   | Score=0.91 | rs7911953.          | . | . | . | . | 0.091 |
| . ENST0000.       | 7p1. | .   | Score=0.91 | ID.                 | . | . | . | . | 0.045 |
| . ENST0000.       | 7p1. | .   | Score=0.91 | .                   | . | . | . | . | .     |
| ZNF71: ENST0000.  | 7p1. | .   | Score=0.81 | .                   | . | . | . | . | .     |
| . ENST0000.       | 7q1. | .   | .          | Score rs4311554 ID. | . | . | . | . | .     |
| . ENST0000.       | 7q1. | .   | Score=0.91 | .                   | . | . | . | . | .     |
| . ENST0000.       | 7q1. | .   | Score=0.91 | .                   | . | . | . | . | .     |
| . ENST0000.       | 7q1. | .   | Score=0.91 | rs5467260.          | . | . | . | . | 0.022 |
| . ENST0000.       | 7q1. | .   | Score=0.91 | ID.                 | . | . | . | . | .     |
| . ENST0000.       | 7q1. | .   | Score=0.91 | rs8688020 ID.       | . | . | . | . | .     |
| . ENST0000.       | 7q1. | .   | Score=0.91 | Score rs8799757 ID. | . | . | . | . | .     |
| . ENST0000.       | 7q2. | .   | .          | rs7686126.          | . | . | . | . | .     |
| . ENST0000.       | 7q2. | .   | Score=0.91 | rs3727203 ID.       | . | . | . | . | .     |
| POT1: ENST0000.   | 7q3. | Sc. | .          | rs7809364.          | . | . | . | . | .     |
| SSME: ENST0000.   | 7q3. | .   | .          | ID.                 | . | . | . | . | .     |
| KMT2C: ENST0000.  | 7q3. | .   | Score=0.91 | rs7754267 ID.       | . | . | . | . | .     |
| KMT2C: ENST0000.  | 7q3. | Sc  | Score=0.91 | rs1499922 ID.       | . | . | . | . | .     |
| . ENST0000.       | 7q3. | .   | Score=0.91 | Score.              | . | . | . | . | .     |
| . ENST0000.       | 7q3. | .   | .          | Score rs1407758 ID. | . | . | . | . | .     |
| . ENST0000.       | 7q3. | .   | .          | Score rs1482637 ID. | . | . | . | . | .     |
| . ENST0000.       | 8p2. | .   | Score=0.91 | .                   | . | . | . | . | .     |
| . ENST0000.       | 8p2. | .   | .          | .                   | . | . | . | . | .     |
| . ENST0000.       | 8p2. | .   | .          | .                   | . | . | . | . | .     |
| KCTD9: ENST0000.  | 8p2. | Sc. | .          | .                   | . | . | . | . | .     |
| . ENST0000.       | 8p1. | .   | .          | Score rs1813428.    | . | . | . | . | .     |
| . ENST0000.       | 8p1. | .   | .          | Score rs2022368 ID. | . | . | . | . | .     |
| . ENST0000.       | 8q1. | .   | .          | .                   | . | . | . | . | .     |
| . ENST0000.       | 8q2. | .   | .          | rs1837720 ID.       | . | . | . | . | .     |
| . ENST0000.       | 9p1. | .   | Score=0.91 | rs1329860 ID.       | . | . | . | . | .     |
| . ENST0000.       | 9q1. | .   | Score=0.91 | rs2954515.          | . | . | . | . | .     |
| . ENST0000.       | 9q1. | .   | Score=0.91 | rs1968548.          | . | . | . | . | .     |
| . ENST0000.       | 9q1. | .   | Score=0.91 | rs2019611 ID.       | . | . | . | . | .     |
| . ENST0000.       | 9q1. | .   | Score=0.81 | Score rs4928839.    | . | . | . | . | .     |
| . ENST0000.       | 9q2. | .   | .          | .                   | . | . | . | . | .     |
| . ENST0000.       | 9q3. | .   | Score=0.91 | rs2868900.          | . | . | . | . | .     |
| ENG: N ENST0000.  | 9q3. | .   | .          | .                   | . | . | . | . | .     |
| FNBP1: ENST0000.  | 9q3. | .   | .          | .                   | . | . | . | . | .     |
| . ENST0000.       | 9q3. | .   | .          | .                   | . | . | . | . | .     |
| DBH: N ENST0000.  | 9q3. | .   | .          | rs7694907.          | . | . | . | . | .     |
| HSPA1: ENST0000.  | 10p. | .   | .          | .                   | . | . | . | . | .     |
| . ENST0000.       | 10p. | .   | .          | Score rs1051909.    | . | . | . | . | .     |
| MYO3A: ENST0000.  | 10p. | .   | .          | ID.                 | . | . | . | . | .     |
| MYO3A: ENST0000.  | 10p. | Sc. | .          | .                   | . | . | . | . | .     |
| UNKNC: ENST0000.  | 10p. | .   | Score=0.91 | rs7531795 ID.       | . | . | . | . | .     |
| SVIL: N ENST0000. | 10p. | .   | .          | rs5566342.          | . | . | . | . | .     |
| . ENST0000.       | 10p. | .   | Score=0.91 | rs1759036 ID.       | . | . | . | . | .     |
| . ENST0000.       | 10p. | .   | Score=0.91 | .                   | . | . | . | . | .     |

|                  |      |               |                     |       |       |
|------------------|------|---------------|---------------------|-------|-------|
| . ENST0000.      | 10p. | . Score=0.97. | rs1494650 ID.       | . . . | . . . |
| . ENST0000.      | 10p. | . Score=0.96. | rs5524339.          | . . . | 0.001 |
| . ENST0000.      | 10q. | . Score=0.96. | rs7827248 ID.       | . . . | . . . |
| RBP3:1 ENST0000. | 10q. | . . .         | rs7821206.          | . . . | . . . |
| . ENST0000.      | 10q. | . . .         | . . .               | . . . | . . . |
| ATOH7 ENST0000.  | 10q. | . . .         | . . .               | . . . | . . . |
| TET1:1 ENST0000. | 10q. | . . .         | rs1810812 ID.       | . . . | . . . |
| STOX1 ENST0000.  | 10q. | . . .         | rs1852770.          | . . . | . . . |
| . ENST0000.      | 10q. | . Score=0.97. | . . .               | . . . | . . . |
| . ENST0000.      | 10q. | Sc.           | . . .               | . . . | . . . |
| . ENST0000.      | 10q. | . . .         | rs9002476 ID.       | . . . | . . . |
| . ENST0000.      | 10q. | . . .         | Score.              | . . . | . . . |
| . ENST0000.      | 10q. | . . .         | rs1028763.          | . . . | . . . |
| . ENST0000.      | 11p. | . . .         | . . .               | . . . | . . . |
| . ENST0000.      | 11p. | . . .         | Score rs7615769 ID. | . . . | . . . |
| . ENST0000.      | 11p. | . . .         | Score.              | . . . | . . . |
| . . .            | 11p. | . Score=0.96. | . . .               | . . . | . . . |
| . ENST0000.      | 11q. | . . .         | . . .               | . . . | . . . |
| PRKR11 ENST0000. | 11q. | . Score=0.96. | . ID.               | . . . | . . . |
| . ENST0000.      | 11q. | . Score=0.97. | . . .               | . . . | . . . |
| . ENST0000.      | 11q. | . Score=0.97. | . . .               | . . . | . . . |
| USP35 ENST0000.  | 11q. | . . .         | rs7614089.          | . . . | . . . |
| HEPHL ENST0000.  | 11q. | Sc.           | rs1438612 ID.       | . . . | . . . |
| SIK2:1 ENST0000. | 11q. | . . .         | . . .               | . . . | . . . |
| OR10S ENST0000.  | 11q. | . . .         | rs7757345 ID.       | . . . | . . . |
| . ENST0000.      | 11q. | . . .         | rs2512286.          | . . . | 0.164 |
| . ENST0000.      | 12p. | . Score=0.96. | rs5382343 ID.       | . . . | 0.375 |
| . ENST0000.      | 12p. | . Score=0.96. | rs8799828.          | . . . | . . . |
| SLC6A ENST0000.  | 12p. | . . .         | . . .               | . . . | . . . |
| . ENST0000.      | 12p. | . . .         | Score rs8681434 ID. | . . . | . . . |
| . ENST0000.      | 12p. | . Score=0.96. | rs2575282.          | . . . | . . . |
| . ENST0000.      | 12q. | . . .         | . . .               | . . . | . . . |
| . ENST0000.      | 12q. | . . .         | Score.              | . . . | . . . |
| BIN2:1 ENST0000. | 12q. | . . .         | . . .               | . . . | . . . |
| . ENST0000.      | 12q. | . Score=0.97. | . . .               | . . . | . . . |
| . ENST0000.      | 12q. | . Score=0.89. | . . .               | . . . | . . . |
| CHST1 ENST0000.  | 12q. | Sc.           | rs1043870 ID.       | . . . | . . . |
| . ENST0000.      | 12q. | . . .         | Score.              | . . . | . . . |
| . ENST0000.      | 12q. | . . .         | . . .               | . . . | . . . |
| PCDH1 ENST0000.  | 13q. | . . .         | . . .               | . . . | . . . |
| . ENST0000.      | 14q. | . Score=0.96. | . ID.               | . . . | . . . |
| . ENST0000.      | 14q. | . Score=0.96. | rs2014705 ID.       | . . . | . . . |
| . . .            | 14q. | . Score=0.96. | rs8794601 ID.       | . . . | . . . |
| . ENST0000.      | 14q. | . Score=0.96. | . . .               | . . . | . . . |
| . ENST0000.      | 14q. | . Score=0.96. | rs8674109.          | . . . | . . . |
| KLHL3: ENST0000. | 14q. | Sc.           | . . .               | . . . | . . . |
| . . .            | 14q. | . . .         | . . .               | . . . | . . . |
| . . .            | 14q. | . . .         | . . .               | . . . | . . . |
| . ENST0000.      | 14q. | . . .         | . . .               | . . . | . . . |
| . . .            | 14q. | . . .         | . . .               | . . . | . . . |
| . ENST0000.      | 14q. | . . .         | . . .               | . . . | . . . |
| SYNE2 ENST0000.  | 14q. | . . .         | rs7732738 ID.       | . . . | . . . |
| . ENST0000.      | 14q. | . Score=0.96. | . . .               | . . . | . . . |
| . . .            | 14q. | . Score=0.96. | Score rs2897118.    | . . . | . . . |

|                 |      |             |                       |             |
|-----------------|------|-------------|-----------------------|-------------|
| . ENST0000.     | 14q. | . Score=0.9 | . rs3681255 ID.       | . . .       |
| . . .           | 14q. | . Score=0.9 | . rs6199969 ID.       | . . .       |
| . ENST0000.     | 15q. | . Score=0.9 | . . . . .             | . . .       |
| . ENST0000.     | 15q. | . Score=0.9 | . Score.              | . . .       |
| . . .           | 15q. | . Score=0.9 | . rs3749240 ID.       | . . .       |
| . ENST0000.     | 15q. | . Score=0.9 | . . . . .             | . . .       |
| . ENST0000.     | 15q. | . Score=0.9 | . . . . .             | . . .       |
| . ENST0000.     | 15q. | . Score=0.9 | . ID.                 | . . .       |
| . . .           | 15q. | . Score=0.9 | . rs7964394.          | . . .       |
| . . .           | 15q. | . Score=0.9 | . . . . .             | . . .       |
| . . .           | 15q. | . Score=0.9 | . rs7126232.          | . . . 0.384 |
| NPAP1 ENST0000. | 15q. | . . . . .   | . ID.                 | . . .       |
| ATP10 ENST0000. | 15q. | Sc.         | . . . . .             | . . .       |
| GOLG ENST0000.  | 15q. | . Score=0.9 | . rs7695754 ID.       | . . .       |
| APBA2 ENST0000. | 15q. | Sc.         | . . . . .             | . . .       |
| . ENST0000.     | 15q. | . Score=0.9 | . ID.                 | . . .       |
| . ENST0000.     | 15q. | . Score=0.9 | . . . . .             | . . .       |
| . ENST0000.     | 15q. | . Score=0.9 | . rs8658676.          | . . .       |
| . ENST0000.     | 15q. | . Score=0.9 | . . . . .             | . . .       |
| . ENST0000.     | 15q. | . . . . .   | . Score rs3683923 ID. | . . .       |
| . ENST0000.     | 15q. | . . . . .   | . rs3741666.          | . . .       |
| . ENST0000.     | 15q. | . Score=0.9 | . . . . .             | . . .       |
| . ENST0000.     | 15q. | . Score=0.9 | . rs5743805.          | . . . 0.002 |
| GOLG ENST0000.  | 15q. | . Score=0.9 | . rs1998088 ID.       | . . .       |
| GOLG ENST0000.  | 15q. | . Score=0.9 | . rs3775649 ID.       | . . .       |
| . ENST0000.     | 15q. | . Score=0.9 | . rs6202866 ID.       | . . .       |
| . ENST0000.     | 16p. | . . . . .   | . rs7561426.          | . . .       |
| . ENST0000.     | 16p. | . . . . .   | . Score. ID.          | . . .       |
| CORO ENST0000.  | 16p. | Sc.         | . rs7464587.          | . . .       |
| ZNF64 ENST0000. | 16p. | . . . . .   | . . . . .             | . . .       |
| . ENST0000.     | 16p. | . Score=0.9 | . rs2018870 ID.       | . . .       |
| . . .           | 16q. | . . . . .   | . Score rs4643347.    | . . .       |
| . . .           | 16q. | . . . . .   | . Score rs4535017.    | . . .       |
| . . .           | 16q. | . . . . .   | . Score rs2128471.    | . . .       |
| . . .           | 16q. | . . . . .   | . Score rs2888787.    | . . .       |
| . . .           | 16q. | . . . . .   | . Score rs4355081.    | . . .       |
| . . .           | 16q. | . . . . .   | . Score rs4249097.    | . . .       |
| . . .           | 16q. | . . . . .   | . Score rs4232920 ID. | . . .       |
| . . .           | 16q. | . . . . .   | . Score rs7970299.    | . . .       |
| . . .           | 16q. | . . . . .   | . Score rs1483332.    | . . .       |
| . . .           | 16q. | . . . . .   | . Score rs9972801.    | . . .       |
| . . .           | 16q. | . . . . .   | . Score rs2878607.    | . . .       |
| . . .           | 16q. | . . . . .   | . Score rs4249050.    | . . .       |
| . . .           | 16q. | . . . . .   | . Score rs4250282.    | . . .       |
| . . .           | 16q. | . . . . .   | . Score rs7198709.    | . . .       |
| . . .           | 16q. | . . . . .   | . Score rs4445923.    | . . .       |
| . . .           | 16q. | . . . . .   | . Score rs4450416 ID. | . . .       |
| . . .           | 16q. | . . . . .   | . Score.              | . . .       |
| . . .           | 16q. | . . . . .   | . Score rs8056404.    | . . .       |
| . . .           | 16q. | . . . . .   | . Score rs8056672 ID. | . . .       |
| . . .           | 16q. | . . . . .   | . Score rs6152895.    | . . .       |
| . . .           | 16q. | . . . . .   | . Score rs2884801.    | . . .       |
| . ENST0000.     | 16q. | . . . . .   | . . . . .             | . . .       |
| CBFB ENST0000.  | 16q. | Sc.         | . . . ID.             | . . .       |

|        |           |      | Score.    | ID.              |     |       |
|--------|-----------|------|-----------|------------------|-----|-------|
| .      | 16q.      | .    | .         | .                | .   | .     |
| ZNF469 | ENST0000. | 16q. | Sc.       | .                | .   | .     |
| PRPF8  | ENST0000. | 17p. | .         | rs7801100.       | .   | .     |
| SPATA  | ENST0000. | 17p. | Sc.       | .                | .   | .     |
| CHD31  | ENST0000. | 17p. | Sc.       | rs3687584.       | .   | .     |
| .      | ENST0000. | 17p. | .         | .                | .   | .     |
| .      | ENST0000. | 17p. | Score=0.9 | rs1845094.       | .   | .     |
| .      | ENST0000. | 17p. | .         | .                | .   | .     |
| .      | ENST0000. | 17p. | Score=0.9 | .                | .   | .     |
| .      | .         | 17p. | Score=0.9 | Score.           | .   | .     |
| .      | ENST0000. | 17p. | Score=0.9 | rs4503851.       | .   | .     |
| .      | .         | 17p. | .         | Score rs1462263  | ID. | .     |
| .      | .         | 17p. | .         | Score rs4362423  | ID. | .     |
| .      | .         | 17p. | .         | Score rs6565430. | .   | .     |
| .      | .         | 17p. | .         | Score rs1434103. | .   | .     |
| .      | .         | 17p. | .         | Score.           | .   | .     |
| .      | ENST0000. | 17q. | .         | Score rs8916657. | .   | .     |
| .      | ENST0000. | 17q. | .         | Score rs1167082. | .   | 0.001 |
| .      | ENST0000. | 17q. | .         | .                | .   | .     |
| .      | ENST0000. | 17q. | .         | rs1459625        | ID. | .     |
| .      | ENST0000. | 17q. | Score=0.9 | rs1724395.       | .   | .     |
| .      | ENST0000. | 17q. | .         | .                | .   | .     |
| .      | ENST0000. | 17q. | .         | Score.           | .   | .     |
| .      | ENST0000. | 17q. | .         | .                | .   | .     |
| EPB411 | ENST0000. | 18p. | .         | .                | .   | .     |
| .      | ENST0000. | 18p. | Score=0.9 | rs5374020        | ID. | .     |
| .      | ENST0000. | 18p. | Score=0.9 | rs2012257        | ID. | .     |
| .      | .         | 19q. | Score=0.9 | Score.           | .   | .     |
| .      | .         | 19q. | Score=0.9 | Score rs7125437. | .   | .     |
| .      | .         | 19q. | Score=0.9 | Score.           | .   | .     |
| .      | ENST0000. | 19q. | Score=0.9 | Score.           | ID. | .     |
| .      | ENST0000. | 19q. | Score=0.9 | .                | .   | .     |
| .      | ENST0000. | 19q. | .         | .                | .   | .     |
| .      | ENST0000. | 19q. | .         | .                | .   | .     |
| .      | ENST0000. | 19q. | .         | .                | .   | .     |
| NLRP5  | ENST0000. | 19q. | .         | .                | .   | .     |
| .      | .         | 19q. | .         | Score rs8677343. | .   | .     |
| .      | ENST0000. | 20q. | .         | .                | .   | .     |
| .      | ENST0000. | 20q. | .         | .                | .   | .     |
| .      | ENST0000. | 21p. | Score=0.9 | Score rs8795581. | .   | .     |
| .      | ENST0000. | 21p. | Score=0.9 | rs8661396        | ID. | .     |
| .      | .         | 21p. | Score=0.9 | .                | .   | .     |
| .      | ENST0000. | 21p. | Score=0.9 | Score rs7532385  | ID. | .     |
| .      | ENST0000. | 21p. | Score=0.9 | Score rs3737231. | .   | .     |
| .      | .         | 21p. | Score=0.9 | .                | .   | .     |
| .      | ENST0000. | 22q. | Score=0.9 | rs2003402.       | .   | .     |
| .      | ENST0000. | 22q. | Score=0.9 | rs2818474        | ID. | 0.103 |
| UNKNC  | ENST0000. | 22q. | .         | rs5464921        | ID. | .     |
| .      | ENST0000. | 22q. | .         | rs9350299.       | .   | .     |
| .      | ENST0000. | 22q. | Score=0.9 | rs4050109.       | .   | .     |
| .      | ENST0000. | 22q. | Score=0.9 | .                | .   | .     |
| .      | ENST0000. | 22q. | Score=0.9 | .                | .   | .     |
| .      | ENST0000. | 22q. | .         | .                | .   | .     |
| .      | ENST0000. | 22q. | .         | .                | .   | .     |



|          |           |      |   |           |                      |         |   |   |       |
|----------|-----------|------|---|-----------|----------------------|---------|---|---|-------|
| .        | ENST0000. | 1q2. | . | .         | rs8790889.           | .       | . | . | .     |
| .        | ENST0000. | 1q4. | . | .         | .                    | .       | . | . | .     |
| .        | ENST0000. | 1q4. | . | Score=0.9 | Score.               | .       | . | . | .     |
| .        | .         | 1q4. | . | Score=0.9 | .                    | .       | . | . | .     |
| .        | ENST0000. | 1q4. | . | .         | .                    | .       | . | . | .     |
| .        | ENST0000. | 2p2. | . | .         | .                    | .       | . | . | .     |
| .        | .         | 2p1. | . | Score=0.9 | Score rs1020943 ID.  | .       | . | . | .     |
| .        | ENST0000. | 2p1. | . | Score=0.9 | Score.               | .       | . | . | .     |
| .        | ENST0000. | 2p1. | . | Score=0.9 | Score rs2004118 ID.  | .       | . | . | .     |
| .        | ENST0000. | 2q1. | . | Score=0.9 | rs2021466 ID.        | .       | . | . | .     |
| .        | ENST0000. | 2q1. | . | Score=0.9 | rs3694799 ID.        | .       | . | . | .     |
| RGPD4    | ENST0000. | 2q1. | . | Score=0.9 | rs5416674 ID.        | .       | . | . | 0.002 |
| .        | ENST0000. | 2q1. | . | Score=0.9 | rs1053772.           | .       | . | . | .     |
| .        | ENST0000. | 2q1. | . | Score=0.9 | ID.                  | .       | . | . | .     |
| .        | .         | 2q2. | . | Score=0.9 | rs5382277.           | .       | . | . | 0.001 |
| .        | ENST0000. | 2q2. | . | .         | .                    | .       | . | . | .     |
| .        | ENST0000. | 2q3. | . | .         | rs1875087.           | .       | . | . | 0.003 |
| TTN:NI   | ENST0000. | 2q3. | . | .         | .                    | .       | . | . | .     |
| .        | ENST0000. | 2q3. | . | .         | .                    | .       | . | . | .     |
| .        | ENST0000. | 2q3. | . | .         | .                    | .       | . | . | .     |
| COL4A    | ENST0000. | 2q3. | . | .         | rs1509794.           | Benigl. | . | . | 0.026 |
| NGEF:II  | ENST0000. | 2q3. | . | .         | ID.                  | .       | . | . | .     |
| .        | .         | 2q3. | . | Score=0.9 | rs7970263.           | .       | . | . | .     |
| .        | ENST0000. | 3p2. | . | .         | .                    | .       | . | . | .     |
| .        | ENST0000. | 3p2. | . | .         | .                    | .       | . | . | .     |
| MST1:II  | ENST0000. | 3p2. | . | Score=0.9 | rs6777426 ID.        | .       | . | . | .     |
| .        | ENST0000. | 3p2. | . | Score=0.9 | rs6779963 ID.        | .       | . | . | .     |
| UNKNC    | ENST0000. | 3p1. | . | .         | rs5472981.           | .       | . | . | .     |
| .        | ENST0000. | 3p1. | . | .         | .                    | .       | . | . | .     |
| .        | ENST0000. | 3q2. | . | Score=0.9 | .                    | .       | . | . | .     |
| PIK3C/I  | ENST0000. | 3q2. | . | Score=0.9 | rs1219132 ID: Patho. | .       | . | . | .     |
| .        | ENST0000. | 3q2. | . | .         | .                    | .       | . | . | .     |
| GMNC:II  | ENST0000. | 3q2. | . | .         | .                    | .       | . | . | .     |
| .        | ENST0000. | 3q2. | . | Score.    | .                    | .       | . | . | .     |
| .        | ENST0000. | 3q2. | . | Score=0.9 | rs4857535.           | .       | . | . | .     |
| .        | ENST0000. | 4p1. | . | .         | .                    | .       | . | . | .     |
| USP17/II | ENST0000. | 4p1. | . | Score=0.9 | .                    | .       | . | . | .     |
| .        | ENST0000. | 4p1. | . | Score=0.9 | .                    | .       | . | . | .     |
| .        | .         | 4p1. | . | Score=0.9 | rs7961122.           | .       | . | . | .     |
| .        | ENST0000. | 4p1. | . | .         | .                    | .       | . | . | .     |
| .        | .         | 4p1. | . | Score=0.9 | Score.               | ID.     | . | . | .     |
| .        | ENST0000. | 4q1. | . | .         | .                    | .       | . | . | .     |
| PRDM8    | ENST0000. | 4q2. | . | .         | Score rs3705413.     | .       | . | . | .     |
| UNKNC    | ENST0000. | 4q2. | . | .         | .                    | .       | . | . | .     |
| .        | ENST0000. | 4q2. | . | .         | .                    | .       | . | . | .     |
| .        | ENST0000. | 4q2. | . | .         | .                    | .       | . | . | .     |
| GYPB:II  | ENST0000. | 4q3. | . | Score=0.9 | rs2016625 ID.        | .       | . | . | .     |
| .        | ENST0000. | 4q3. | . | .         | .                    | .       | . | . | .     |
| ZFP42:II | ENST0000. | 4q3. | . | .         | rs7619626.           | .       | . | . | .     |
| .        | ENST0000. | 5p1. | . | Score=0.9 | rs8684061 ID.        | .       | . | . | .     |
| .        | ENST0000. | 5p1. | . | .         | .                    | .       | . | . | .     |
| .        | .         | 5p1. | . | Score=0.9 | Score.               | .       | . | . | .     |
| .        | ENST0000. | 5p1. | . | Score=0.9 | Score.               | .       | . | . | .     |
| .        | .         | 5q1. | . | .         | Score rs8659304 ID.  | .       | . | . | .     |



|        |           |      |    |                               |   |   |       |
|--------|-----------|------|----|-------------------------------|---|---|-------|
| .      | .         | 5q1. | .  | Score rs1335780 ID:           | . | . | .     |
| .      | .         | 5q1. | .  | Score rs1483787 ID:           | . | . | 0.018 |
| .      | ENST0000. | 5q1. | Sc | Score.                        | . | . | .     |
| .      | ENST0000. | 5q1. | .  | Score rs1416874.              | . | . | 0.425 |
| .      | ENST0000. | 5q3. | .  | .                             | . | . | .     |
| .      | ENST0000. | 5q3. | .  | Score rs7284112.              | . | . | .     |
| .      | ENST0000. | 5q3. | .  | rs1829546.                    | . | . | .     |
| STK19: | ENST0000. | 6p2. | Sc | Score=0.9 rs7743469 ID:       | . | . | 0.027 |
| .      | ENST0000. | 6p2. | .  | Score=0.9 rs1403232.          | . | . | 0.149 |
| .      | ENST0000. | 6p2. | .  | Score rs7596914.              | . | . | .     |
| .      | .         | 6p1. | .  | Score rs4928651 ID:           | . | . | .     |
| DSE:NI | ENST0000. | 6q2. | Sc | Score=0.9.                    | . | . | .     |
| .      | ENST0000. | 7p2. | .  | .                             | . | . | .     |
| .      | ENST0000. | 7p1. | .  | rs7467237.                    | . | . | .     |
| NACAL  | ENST0000. | 7p1. | .  | rs7762925 ID:                 | . | . | .     |
| .      | .         | 7p1. | .  | Score=0.9 Score.              | . | . | .     |
| .      | ENST0000. | 7p1. | .  | Score=0.9.                    | . | . | .     |
| .      | ENST0000. | 7p1. | .  | Score=0.9 rs1422600.          | . | . | .     |
| .      | .         | 7q1. | .  | Score rs4460255.              | . | . | .     |
| .      | .         | 7q1. | .  | Score=0.9.                    | . | . | .     |
| .      | .         | 7q1. | .  | Score=0.9 rs3740384.          | . | . | .     |
| .      | .         | 7q1. | .  | Score=0.9 rs8672068.          | . | . | .     |
| .      | .         | 7q1. | .  | Score=0.9.                    | . | . | .     |
| .      | .         | 7q1. | .  | Score=0.9.                    | . | . | .     |
| .      | .         | 7q1. | .  | Score=0.9.                    | . | . | .     |
| .      | ENST0000. | 7q1. | .  | Score=0.9 Score rs5541523.    | . | . | 0.011 |
| .      | ENST0000. | 7q2. | .  | Score=0.9 Score rs3757000.    | . | . | .     |
| GPR85  | ENST0000. | 7q3. | Sc | .                             | . | . | .     |
| .      | ENST0000. | 7q3. | .  | Score.                        | . | . | .     |
| .      | ENST0000. | 7q3. | .  | .                             | . | . | .     |
| .      | ENST0000. | 7q3. | .  | .                             | . | . | .     |
| .      | ENST0000. | 7q3. | .  | rs8681384 ID:                 | . | . | .     |
| .      | ENST0000. | 8p2. | .  | .                             | . | . | .     |
| .      | .         | 8p2. | .  | Score=0.9 Score rs3989791 ID: | . | . | .     |
| .      | .         | 8p2. | .  | Score=0.9.                    | . | . | .     |
| RP1L1: | ENST0000. | 8p2. | .  | rs7469289 ID:                 | . | . | .     |
| .      | .         | 8p2. | .  | Score=0.9 rs7595500.          | . | . | .     |
| .      | ENST0000. | 8p2. | .  | .                             | . | . | .     |
| .      | ENST0000. | 8p2. | .  | .                             | . | . | .     |
| .      | .         | 8q1. | .  | Score.                        | . | . | .     |
| .      | .         | 8q1. | .  | Score rs4440644.              | . | . | .     |
| .      | ENST0000. | 8q2. | .  | Score.                        | . | . | .     |
| .      | ENST0000. | 8q2. | .  | .                             | . | . | .     |
| .      | ENST0000. | 8q2. | .  | .                             | . | . | .     |
| .      | ENST0000. | 9p2. | .  | rs5356927.                    | . | . | .     |
| .      | ENST0000. | 9p1. | .  | rs5620843.                    | . | . | .     |
| CNTNA  | ENST0000. | 9p1. | Sc | Score=0.9 rs1412360 ID:       | . | . | .     |
| .      | ENST0000. | 9p1. | .  | Score=0.9 rs3755065 ID:       | . | . | .     |
| .      | .         | 9p1. | .  | Score=0.9 Score rs5368523.    | . | . | 0.002 |
| .      | ENST0000. | 9q1. | .  | Score=0.9 rs7792676.          | . | . | .     |
| .      | .         | 9q1. | .  | Score=0.9 rs1968548.          | . | . | .     |
| .      | ENST0000. | 9q1. | Sc | Score=0.9 rs6254382 ID:       | . | . | 0.37  |
| .      | ENST0000. | 9q2. | .  | ID:                           | . | . | .     |
| .      | .         | 9q3. | .  | rs5781745.                    | . | . | .     |



|        |           |      |     |           |                     |   |   |   |   |   |   |
|--------|-----------|------|-----|-----------|---------------------|---|---|---|---|---|---|
| .      | ENST0000. | 14q. | Sc. | .         | .                   | . | . | . | . | . | . |
| C14orf | ENST0000. | 14q. | .   | .         | .                   | . | . | . | . | . | . |
| RBM25  | ENST0000. | 14q. | .   | .         | .                   | . | . | . | . | . | . |
| .      | ENST0000. | 14q. | .   | .         | .                   | . | . | . | . | . | . |
| .      | ENST0000. | 14q. | .   | .         | Score.              | . | . | . | . | . | . |
| .      | ENST0000. | 14q. | .   | .         | rs9310230           | . | . | . | . | . | . |
| .      | ENST0000. | 14q. | .   | .         | .                   | . | . | . | . | . | . |
| .      | ENST0000. | 15q. | .   | Score=0.9 | rs2259724           | . | . | . | . | . | . |
| .      | ENST0000. | 15q. | .   | Score=0.9 | rs2648130           | . | . | . | . | . | . |
| .      | ENST0000. | 15q. | .   | Score=0.9 | rs2015085           | . | . | . | . | . | . |
| .      | ENST0000. | 15q. | .   | Score=0.9 | rs2007357 ID:       | . | . | . | . | . | . |
| UNKNC  | ENST0000. | 15q. | Sc. | .         | .                   | . | . | . | . | . | . |
| VPS18: | ENST0000. | 15q. | Sc. | .         | .                   | . | . | . | . | . | . |
| .      | ENST0000. | 15q. | .   | .         | Score.              | . | . | . | . | . | . |
| .      | ENST0000. | 15q. | .   | .         | .                   | . | . | . | . | . | . |
| .      | ENST0000. | 15q. | .   | .         | .                   | . | . | . | . | . | . |
| .      | ENST0000. | 15q. | .   | Score.    | .                   | . | . | . | . | . | . |
| .      | ENST0000. | 15q. | .   | Score=0.9 | ID:                 | . | . | . | . | . | . |
| .      | ENST0000. | 15q. | .   | Score=0.9 | rs1401448 ID:       | . | . | . | . | . | . |
| .      | ENST0000. | 15q. | .   | .         | Score rs8788873     | . | . | . | . | . | . |
| .      | ENST0000. | 15q. | .   | Score=0.9 | rs2870850 ID:       | . | . | . | . | . | . |
| .      | ENST0000. | 15q. | .   | .         | .                   | . | . | . | . | . | . |
| ADAM1  | ENST0000. | 15q. | .   | .         | rs7724699           | . | . | . | . | . | . |
| .      | ENST0000. | 15q. | .   | Score=0.9 | ID:                 | . | . | . | . | . | . |
| .      | ENST0000. | 16p. | .   | Score=0.9 | rs7760391 ID:       | . | . | . | . | . | . |
| .      | ENST0000. | 16p. | Sc. | .         | .                   | . | . | . | . | . | . |
| .      | ENST0000. | 16p. | Sc. | .         | .                   | . | . | . | . | . | . |
| SRCAF  | ENST0000. | 16p. | Sc. | .         | .                   | . | . | . | . | . | . |
| .      | ENST0000. | 16p. | .   | Score=0.9 | rs2111615           | . | . | . | . | . | . |
| .      | ENST0000. | 16p. | .   | Score=0.9 | rs1123661           | . | . | . | . | . | . |
| .      | ENST0000. | 16p. | .   | .         | .                   | . | . | . | . | . | . |
| .      | ENST0000. | 16p. | .   | .         | rs5547762           | . | . | . | . | . | . |
| .      | .         | 16p. | .   | .         | Score rs3718897     | . | . | . | . | . | . |
| .      | .         | 16q. | .   | .         | Score rs4967312 ID: | . | . | . | . | . | . |
| .      | .         | 16q. | .   | .         | Score rs4270195 ID: | . | . | . | . | . | . |
| .      | .         | 16q. | .   | .         | Score rs4347658     | . | . | . | . | . | . |
| .      | .         | 16q. | .   | .         | Score rs4246399     | . | . | . | . | . | . |
| .      | .         | 16q. | .   | .         | Score rs5908263     | . | . | . | . | . | . |
| .      | .         | 16q. | .   | .         | Score rs4249045     | . | . | . | . | . | . |
| .      | .         | 16q. | .   | .         | Score rs7188365 ID: | . | . | . | . | . | . |
| .      | .         | 16q. | .   | .         | Score rs4249050     | . | . | . | . | . | . |
| .      | .         | 16q. | .   | .         | Score rs4505355     | . | . | . | . | . | . |
| .      | .         | 16q. | .   | .         | Score rs1244825     | . | . | . | . | . | . |
| .      | .         | 16q. | .   | .         | rs1393031 ID:       | . | . | . | . | . | . |
| .      | .         | 16q. | .   | .         | rs5614462           | . | . | . | . | . | . |
| .      | .         | 16q. | .   | .         | Score rs4967197     | . | . | . | . | . | . |
| .      | .         | 16q. | .   | .         | Score rs4450416 ID: | . | . | . | . | . | . |
| .      | .         | 16q. | .   | .         | Score rs8056404     | . | . | . | . | . | . |
| .      | .         | 16q. | .   | .         | Score rs4246356     | . | . | . | . | . | . |
| .      | .         | 16q. | .   | .         | Score rs8052624     | . | . | . | . | . | . |
| .      | .         | 16q. | .   | .         | Score rs4249654     | . | . | . | . | . | . |
| .      | .         | 16q. | .   | .         | Score rs2885782     | . | . | . | . | . | . |
| .      | .         | 16q. | .   | .         | Score rs6153388     | . | . | . | . | . | . |
| .      | .         | 16q. | .   | .         | Score.              | . | . | . | . | . | . |

|        |           |   |      |     |           |                     |        |   |   |       |
|--------|-----------|---|------|-----|-----------|---------------------|--------|---|---|-------|
| .      | .         | . | 16q. | .   | .         | Score rs2875315     | .      | . | . | .     |
| .      | .         | . | 16q. | .   | .         | Score.              | .      | . | . | .     |
| .      | .         | . | 16q. | .   | .         | Score rs1479181     | .      | . | . | .     |
| .      | .         | . | 16q. | .   | .         | Score rs8677676     | .      | . | . | .     |
| .      | ENST0000. | . | 16q. | .   | Score=0.9 | Score.              | .      | . | . | .     |
| HP:NM  | ENST0000. | . | 16q. | .   | Score=0.9 | rs1891151           | .      | . | . | 0.003 |
| .      | ENST0000. | . | 16q. | .   | Score=0.9 | rs1291890 ID:       | .      | . | . | 0.259 |
| .      | ENST0000. | . | 16q. | .   | .         | .                   | .      | . | . | .     |
| ACSF3  | ENST0000. | . | 16q. | .   | .         | .                   | .      | . | . | .     |
| ACSF3  | ENST0000. | . | 16q. | .   | .         | rs7697160           | .      | . | . | .     |
| .      | ENST0000. | . | 16q. | .   | Score=0.9 | rs7945920           | .      | . | . | .     |
| .      | ENST0000. | . | 16q. | .   | Score=0.9 | rs3697515 ID:       | .      | . | . | .     |
| .      | ENST0000. | . | 16q. | .   | Score=0.9 | rs5596034 ID:       | .      | . | . | 0.752 |
| XAF1:1 | ENST0000. | . | 17p. | .   | .         | .                   | .      | . | . | .     |
| .      | ENST0000. | . | 17p. | .   | .         | .                   | .      | . | . | .     |
| .      | ENST0000. | . | 17p. | .   | .         | .                   | .      | . | . | .     |
| .      | ENST0000. | . | 17p. | .   | .         | .                   | .      | . | . | .     |
| .      | ENST0000. | . | 17p. | .   | .         | rs9806119           | .      | . | . | .     |
| .      | ENST0000. | . | 17p. | .   | .         | rs7571703           | .      | . | . | .     |
| .      | ENST0000. | . | 17p. | .   | Score=0.9 | rs1460005 ID:       | .      | . | . | .     |
| .      | ENST0000. | . | 17p. | .   | Score=0.9 | rs2168782 ID:       | .      | . | . | 0.171 |
| .      | .         | . | 17p. | .   | Score=0.9 | Score.              | .      | . | . | .     |
| .      | .         | . | 17p. | .   | .         | Score rs4362423 ID: | .      | . | . | .     |
| .      | .         | . | 17p. | .   | .         | Score rs4283255 ID: | .      | . | . | .     |
| .      | .         | . | 17p. | .   | .         | Score rs1403689     | .      | . | . | .     |
| .      | .         | . | 17p. | .   | .         | Score rs1405621     | .      | . | . | .     |
| .      | ENST0000. | . | 17q. | .   | Score=0.9 | .                   | .      | . | . | .     |
| .      | ENST0000. | . | 17q. | .   | Score=0.9 | rs7126069           | .      | . | . | .     |
| .      | ENST0000. | . | 17q. | .   | Score=0.9 | rs573849            | .      | . | . | .     |
| .      | ENST0000. | . | 17q. | .   | Score=0.9 | rs9693530           | .      | . | . | .     |
| .      | ENST0000. | . | 17q. | .   | Score=0.9 | Score.              | .      | . | . | .     |
| .      | ENST0000. | . | 17q. | .   | .         | .                   | .      | . | . | .     |
| .      | ENST0000. | . | 17q. | .   | Score.    | .                   | .      | . | . | .     |
| .      | ENST0000. | . | 17q. | .   | Score=0.9 | rs7516213           | .      | . | . | .     |
| AXIN2: | ENST0000. | . | 17q. | Sc. | .         | rs7607356           | Likely | . | . | .     |
| SEC14  | ENST0000. | . | 17q. | .   | .         | .                   | .      | . | . | .     |
| .      | ENST0000. | . | 17q. | .   | .         | .                   | .      | . | . | .     |
| .      | ENST0000. | . | 17q. | .   | .         | rs1138327           | .      | . | . | .     |
| .      | ENST0000. | . | 17q. | .   | .         | Score rs8791354     | .      | . | . | .     |
| .      | .         | . | 18p. | .   | Score=0.9 | .                   | .      | . | . | .     |
| .      | ENST0000. | . | 18p. | .   | Score=0.9 | rs8658406 ID:       | .      | . | . | .     |
| .      | ENST0000. | . | 18p. | .   | Score=0.9 | rs8676712           | .      | . | . | .     |
| .      | ENST0000. | . | 19p. | .   | .         | .                   | .      | . | . | .     |
| .      | .         | . | 19p. | .   | .         | rs3756184           | .      | . | . | .     |
| .      | ENST0000. | . | 19p. | .   | .         | .                   | .      | . | . | .     |
| .      | ENST0000. | . | 19p. | .   | .         | .                   | .      | . | . | .     |
| PNPLA  | ENST0000. | . | 19p. | .   | .         | rs5460066           | .      | . | . | .     |
| .      | ENST0000. | . | 19p. | .   | .         | .                   | .      | . | . | .     |
| .      | ENST0000. | . | 19q. | .   | .         | .                   | .      | . | . | .     |
| .      | ENST0000. | . | 19q. | .   | .         | .                   | .      | . | . | .     |
| .      | .         | . | 19q. | .   | Score=0.9 | Score rs2385185     | .      | . | . | .     |
| .      | .         | . | 19q. | .   | Score=0.9 | Score rs7125437     | .      | . | . | .     |
| .      | ENST0000. | . | 19q. | .   | .         | .                   | .      | . | . | .     |
| .      | ENST0000. | . | 19q. | .   | Score=0.8 | rs1390553           | .      | . | . | 0.204 |

|                  |      |     |           |                     |        |   |   |       |
|------------------|------|-----|-----------|---------------------|--------|---|---|-------|
| FPR1:ENST0000.   | 19q. | .   | .         | rs7714460.          | .      | . | . | .     |
| . ENST0000.      | 19q. | .   | Score=0.9 | rs1785512 ID.       | .      | . | . | 0.601 |
| . .              | 19q. | .   | .         | rs9207323.          | .      | . | . | .     |
| RRBP1 ENST0000.  | 20p. | Sc. | .         | .                   | .      | . | . | .     |
| . ENST0000.      | 20p. | .   | Score.    | .                   | .      | . | . | .     |
| ACSS1 ENST0000.  | 20p. | Sc. | .         | rs7787265 ID.       | .      | . | . | .     |
| . ENST0000.      | 20p. | .   | .         | rs3775467.          | .      | . | . | .     |
| . ENST0000.      | 20q. | .   | Score=0.9 | ID.                 | .      | . | . | .     |
| . ENST0000.      | 20q. | .   | .         | .                   | .      | . | . | .     |
| . ENST0000.      | 20q. | .   | Score.    | .                   | .      | . | . | .     |
| BIRC7: ENST0000. | 20q. | .   | .         | .                   | .      | . | . | .     |
| . .              | 21p. | .   | Score=0.9 | Score rs3747993.    | .      | . | . | .     |
| . .              | 21p. | .   | Score=0.9 | Score rs3730978.    | .      | . | . | .     |
| . .              | 21p. | .   | Score=0.9 | Score rs2927801 ID. | .      | . | . | .     |
| . ENST0000.      | 21p. | .   | Score=0.9 | rs1996169.          | .      | . | . | .     |
| . ENST0000.      | 21p. | .   | Score=0.9 | Score rs8789866 ID. | .      | . | . | .     |
| . .              | 21p. | .   | Score=0.9 | rs4358221.          | .      | . | . | .     |
| . .              | 21p. | .   | Score=0.9 | .                   | .      | . | . | .     |
| . .              | 21q. | .   | Score     | rs8664333.          | .      | . | . | .     |
| . ENST0000.      | 21q. | .   | Score     | rs7967544 ID.       | .      | . | . | .     |
| TRAPP ENST0000.  | 21q. | Sc. | .         | .                   | .      | . | . | .     |
| . ENST0000.      | 21q. | .   | .         | .                   | .      | . | . | .     |
| . .              | 21q. | .   | Score=0.9 | .                   | .      | . | . | .     |
| TBX1:ENST0000.   | 22q. | Sc. | Score.    | .                   | .      | . | . | .     |
| . ENST0000.      | 22q. | .   | Score=0.9 | rs3702204.          | .      | . | . | .     |
| . ENST0000.      | 22q. | .   | Score=0.9 | rs1119554.          | .      | . | . | 0.134 |
| . ENST0000.      | 22q. | .   | Score=0.9 | rs1880252.          | .      | . | . | 0.018 |
| . ENST0000.      | 22q. | .   | Score=0.9 | ID.                 | .      | . | . | .     |
| VCX:NI ENST0000. | Xp2. | .   | Score=0.9 | rs1637792 ID.       | .      | . | . | .     |
| . ENST0000.      | Xp2. | .   | .         | .                   | .      | . | . | .     |
| DCAF8 ENST0000.  | Xp2. | .   | Score=0.9 | .                   | .      | . | . | .     |
| . .              | Xp2. | .   | .         | .                   | .      | . | . | .     |
| FAM47 ENST0000.  | Xp2. | .   | .         | rs7740495 ID.       | .      | . | . | .     |
| . ENST0000.      | Xp1. | .   | .         | .                   | .      | . | . | .     |
| . ENST0000.      | Xp1. | .   | .         | .                   | .      | . | . | .     |
| . .              | Xq1. | .   | Score.    | .                   | .      | . | . | .     |
| . .              | Xq1. | .   | Score     | rs8686279.          | .      | . | . | .     |
| . .              | Xq1. | .   | Score.    | .                   | .      | . | . | .     |
| . .              | Xq1. | .   | Score.    | ID.                 | .      | . | . | .     |
| MED12 ENST0000.  | Xq1. | .   | .         | .                   | .      | . | . | .     |
| GPRA5 ENST0000.  | Xq2. | .   | .         | .                   | .      | . | . | .     |
| . .              | Xq2. | .   | Score.    | .                   | .      | . | . | .     |
| . ENST0000.      | Xq2. | .   | .         | .                   | .      | . | . | .     |
| . ENST0000.      | Xq2. | .   | .         | .                   | .      | . | . | .     |
| . ENST0000.      | Xq2. | .   | .         | .                   | .      | . | . | .     |
| . ENST0000.      | Xq2. | .   | .         | rs9883463.          | .      | . | . | .     |
| . ENST0000.      | Xq2. | .   | Score.    | .                   | .      | . | . | .     |
| . ENST0000.      | Xq2. | .   | .         | rs7821231 ID.       | .      | . | . | .     |
| . ENST0000.      | Xq2. | .   | .         | .                   | .      | . | . | .     |
| . .              | Yq1. | .   | Score=0.9 | rs3769023 ID.       | .      | . | . | .     |
| . .              | .    | .   | .         | .                   | .      | . | . | .     |
| . .              | .    | .   | .         | rs1057516).         | Uncer. | . | . | .     |
| . ENST0000.      | 1p3. | .   | Score=0.9 | ID.                 | .      | . | . | .     |
| . ENST0000.      | 1p3. | .   | Score=0.9 | Score.              | .      | . | . | .     |

|         |           |      |             |                  |                       |   |   |   |       |
|---------|-----------|------|-------------|------------------|-----------------------|---|---|---|-------|
| TP73:NE | ENST0000. | 1p3. | Sc.         | .                | .                     | . | . | . | .     |
| .       | ENST0000. | 1p3. | .           | .                | rs7579432.            | . | . | . | .     |
| .       | ENST0000. | 1p3. | Score=0.9f. | .                | rs5565927.            | . | . | . | 0.002 |
| .       | ENST0000. | 1p3. | Score=0.9f. | .                | rs7619917 ID.         | . | . | . | .     |
| .       | ENST0000. | 1p3. | Score=0.9f. | .                | rs663828.             | . | . | . | .     |
| .       | ENST0000. | 1p3. | Score=0.9f. | .                | rs646524 ID.          | . | . | . | .     |
| .       | ENST0000. | 1p3. | Score=0.9f. | .                | rs4596945.            | . | . | . | 0.247 |
| .       | ENST0000. | 1p3. | Score=0.9f. | .                | rs2296161 ID.         | . | . | . | .     |
| EMC1:J  | ENST0000. | 1p3. | .           | .                | rs5616387.            | . | . | . | .     |
| .       | ENST0000. | 1p3. | .           | .                | .                     | . | . | . | .     |
| .       | ENST0000. | 1p3. | .           | .                | Score rs9490484.      | . | . | . | .     |
| .       | ENST0000. | 1p3. | .           | .                | .                     | . | . | . | .     |
| ERICH:  | ENST0000. | 1p3. | .           | .                | .                     | . | . | . | .     |
| .       | ENST0000. | 1p3. | .           | .                | .                     | . | . | . | .     |
| NHLH2   | ENST0000. | 1p1. | .           | .                | .                     | . | . | . | .     |
| .       | ENST0000. | 1q2. | Score=0.9f. | Score rs1409433. | .                     | . | . | . | .     |
| .       | ENST0000. | 1q2. | Score=0.9f. | Score rs2022010. | .                     | . | . | . | .     |
| .       | ENST0000. | 1q2. | Score=0.9f. | .                | rs7763460 ID.         | . | . | . | .     |
| .       | .         | 1q2. | Score=0.9f. | .                | rs1457064.            | . | . | . | .     |
| .       | ENST0000. | 1q2. | Score=0.9f. | .                | .                     | . | . | . | .     |
| .       | .         | 1q2. | Score=0.9f. | .                | rs1148852 ID.         | . | . | . | .     |
| .       | ENST0000. | 1q2. | .           | .                | rs3746294.            | . | . | . | 0.051 |
| .       | ENST0000. | 1q2. | Score=0.9f. | .                | rs3675661 ID.         | . | . | . | .     |
| .       | ENST0000. | 1q2. | Score=0.9f. | .                | rs7986155 ID.         | . | . | . | .     |
| MEX3A   | ENST0000. | 1q2. | .           | .                | rs7593611 ID.         | . | . | . | .     |
| OR6P1   | ENST0000. | 1q2. | Sc.         | .                | .                     | . | . | . | .     |
| .       | ENST0000. | 1q3. | .           | .                | .                     | . | . | . | .     |
| PPFIA4  | ENST0000. | 1q3. | .           | .                | rs7508890.            | . | . | . | .     |
| LEFTY   | ENST0000. | 1q4. | Score=0.9f. | .                | rs1454313 ID.         | . | . | . | 0.216 |
| OR6F1   | ENST0000. | 1q4. | .           | .                | rs3720052 ID.         | . | . | . | .     |
| .       | .         | 1q4. | Score=0.9f. | .                | rs8789457 ID.         | . | . | . | .     |
| VSNL1   | ENST0000. | 2p2. | .           | .                | .                     | . | . | . | .     |
| .       | ENST0000. | 2p1. | .           | .                | .                     | . | . | . | .     |
| LRRTM   | ENST0000. | 2p1. | .           | .                | .                     | . | . | . | .     |
| .       | ENST0000. | 2p1. | Sc          | Score=0.9f.      | rs2013675 ID.         | . | . | . | .     |
| .       | ENST0000. | 2p1. | Score=0.9f. | .                | .                     | . | . | . | .     |
| .       | ENST0000. | 2q2. | .           | .                | Score.                | . | . | . | .     |
| .       | ENST0000. | 2q3. | .           | .                | Score rs1473449 ID.   | . | . | . | .     |
| ITGA4:  | ENST0000. | 2q3. | .           | .                | .                     | . | . | . | .     |
| .       | ENST0000. | 2q3. | .           | .                | .                     | . | . | . | .     |
| .       | .         | 2q3. | Score=0.9f. | Score.           | .                     | . | . | . | .     |
| .       | ENST0000. | 3p2. | .           | .                | Score rs1050893 ID.   | . | . | . | .     |
| .       | ENST0000. | 3p2. | .           | .                | Score.                | . | . | . | .     |
| .       | ENST0000. | 3p1. | .           | .                | rs1178604.            | . | . | . | 0.006 |
| .       | .         | 3p1. | .           | .                | Score rs3744125 ID.   | . | . | . | .     |
| .       | ENST0000. | 3p1. | .           | .                | Score rs1451899.      | . | . | . | 0.081 |
| .       | ENST0000. | 3q2. | .           | .                | .                     | . | . | . | .     |
| .       | ENST0000. | 3q2. | .           | .                | .                     | . | . | . | .     |
| .       | ENST0000. | 3q2. | .           | .                | .                     | . | . | . | .     |
| ARMC8   | ENST0000. | 3q2. | Sc.         | .                | .                     | . | . | . | .     |
| PIK3C7  | ENST0000. | 3q2. | .           | .                | rs1057519 ID: Likely. | . | . | . | .     |
| PIK3C7  | ENST0000. | 3q2. | Score=0.9f. | .                | rs1048860 ID: Patho.  | . | . | . | .     |
| .       | ENST0000. | 3q2. | .           | .                | .                     | . | . | . | .     |
| ZFYVE   | ENST0000. | 4p1. | .           | .                | rs3725657 ID.         | . | . | . | .     |

|        |           |      |     |           |               |     |   |   |       |
|--------|-----------|------|-----|-----------|---------------|-----|---|---|-------|
| .      | ENST0000. | 4p1. | .   | .         | .             | .   | . | . | .     |
| .      | .         | 4p1. | .   | Score=0.9 | rs8796734.    | .   | . | . | .     |
| .      | .         | 4p1. | .   | Score=0.9 | rs5941177.    | .   | . | . | .     |
| NPFFR  | ENST0000. | 4q1. | .   | .         | .             | .   | . | . | .     |
| .      | ENST0000. | 4q3. | .   | Score.    | .             | .   | . | . | .     |
| .      | ENST0000. | 5p1. | .   | Score=0.9 | rs4288119 ID. | .   | . | . | .     |
| .      | ENST0000. | 5p1. | .   | Score=0.9 | rs8669155 ID. | .   | . | . | .     |
| JADE2: | ENST0000. | 5q3. | .   | .         | rs7765625.    | .   | . | . | .     |
| .      | .         | 5q3. | .   | Score     | rs5593800 ID. | .   | . | . | 0.391 |
| .      | ENST0000. | 5q3. | .   | Score=0.9 | .             | .   | . | . | .     |
| .      | ENST0000. | 6p2. | .   | Score.    | .             | .   | . | . | .     |
| HLA-B: | ENST0000. | 6p2. | .   | Score=0.8 | rs1513411.    | .   | . | . | .     |
| EHMT2  | ENST0000. | 6p2. | Sc. | .         | .             | .   | . | . | .     |
| PPARC  | ENST0000. | 6p2. | .   | .         | rs7668272.    | .   | . | . | .     |
| .      | ENST0000. | 6p1. | .   | .         | .             | .   | . | . | .     |
| .      | ENST0000. | 6p1. | .   | Score=0.9 | .             | .   | . | . | .     |
| .      | ENST0000. | 6q1. | .   | .         | .             | .   | . | . | .     |
| .      | ENST0000. | 7p2. | .   | Score=0.8 | .             | .   | . | . | .     |
| .      | ENST0000. | 7p1. | .   | .         | .             | .   | . | . | .     |
| HECW:  | ENST0000. | 7p1. | .   | .         | ID.           | .   | . | . | .     |
| .      | ENST0000. | 7p1. | .   | .         | .             | .   | . | . | .     |
| .      | .         | 7p1. | .   | Score=0.9 | .             | .   | . | . | .     |
| .      | .         | 7p1. | .   | Score=0.9 | rs1439657.    | .   | . | . | 0.189 |
| .      | ENST0000. | 7p1. | .   | Score=0.9 | .             | .   | . | . | .     |
| .      | ENST0000. | 7p1. | .   | Score=0.9 | rs8799634 ID. | .   | . | . | .     |
| .      | ENST0000. | 7p1. | .   | Score=0.9 | .             | .   | . | . | .     |
| .      | ENST0000. | 7p1. | .   | Score=0.9 | rs2002309 ID. | .   | . | . | .     |
| .      | ENST0000. | 7p1. | .   | Score=0.9 | .             | .   | . | . | .     |
| .      | ENST0000. | 7q1. | .   | Score=0.9 | rs2018986 ID. | .   | . | . | .     |
| .      | ENST0000. | 7q1. | .   | Score=0.9 | .             | .   | . | . | .     |
| .      | ENST0000. | 7q1. | .   | Score=0.9 | .             | .   | . | . | .     |
| .      | ENST0000. | 7q1. | .   | Score=0.9 | Score.        | ID. | . | . | .     |
| GNAI1: | ENST0000. | 7q2. | .   | .         | .             | .   | . | . | .     |
| SAMD   | ENST0000. | 7q2. | .   | .         | .             | .   | . | . | .     |
| PDK4:  | ENST0000. | 7q2. | .   | .         | rs2676016.    | .   | . | . | .     |
| .      | ENST0000. | 7q2. | .   | .         | rs1826826.    | .   | . | . | .     |
| .      | ENST0000. | 7q3. | .   | Score     | rs1409779.    | .   | . | . | .     |
| .      | ENST0000. | 7q3. | Sc. | Score.    | .             | .   | . | . | .     |
| .      | ENST0000. | 7q3. | .   | Score=0.9 | .             | .   | . | . | .     |
| .      | .         | 7q3. | .   | Score     | rs7962502.    | .   | . | . | .     |
| ANGPT  | ENST0000. | 8p2. | .   | .         | .             | .   | . | . | .     |
| .      | .         | 8p2. | .   | Score=0.9 | rs3763515 ID. | .   | . | . | .     |
| .      | ENST0000. | 8p2. | .   | Score=0.9 | rs5673338.    | .   | . | . | 0.203 |
| .      | ENST0000. | 8p2. | .   | .         | .             | .   | . | . | .     |
| .      | ENST0000. | 8q2. | .   | .         | .             | .   | . | . | .     |
| .      | ENST0000. | 8q2. | .   | .         | .             | .   | . | . | .     |
| .      | ENST0000. | 8q2. | .   | Score     | rs5609552 ID. | .   | . | . | 0.027 |
| .      | ENST0000. | 9p2. | .   | .         | .             | .   | . | . | .     |
| .      | ENST0000. | 9p1. | .   | Score     | rs1463382 ID. | .   | . | . | 0.003 |
| .      | .         | 9p1. | .   | Score=0.9 | rs7495042 ID. | .   | . | . | .     |
| .      | ENST0000. | 9q1. | .   | Score=0.9 | .             | .   | . | . | .     |
| .      | ENST0000. | 9q1. | .   | Score=0.9 | rs7714176.    | .   | . | . | .     |
| .      | ENST0000. | 9q1. | .   | Score=0.8 | rs4452915 ID. | .   | . | . | .     |
| .      | ENST0000. | 9q1. | .   | Score=0.8 | rs7492487 ID. | .   | . | . | .     |

|                  |      |              |                             |       |
|------------------|------|--------------|-----------------------------|-------|
| . ENST0000.      | 9q2. | . Score=0.9! | rs391727 . . . .            | 0.32  |
| . . . .          | 9q2. | . . . .      | . . . .                     |       |
| . ENST0000.      | 9q2. | . . . .      | . . . .                     |       |
| . ENST0000.      | 9q3. | . Score=0.9! | Score rs2855049 ID: . . . . |       |
| NOTCH1 ENST0000. | 9q3. | . . . .      | rs7771119. Likely . . . .   |       |
| CAMK1 ENST0000.  | 10p. | . . . .      | . . . .                     |       |
| . ENST0000.      | 10p. | . . . .      | . . . .                     |       |
| . ENST0000.      | 10p. | . . . .      | rs7747854 . . . .           |       |
| . ENST0000.      | 10p. | . Score=0.9! | rs1759035 ID: . . . .       |       |
| . . . .          | 10q. | . Score=0.9! | rs3125109 ID: . . . .       |       |
| . ENST0000.      | 10q. | . . . .      | Score. . . .                |       |
| VCL:N ENST0000.  | 10q. | Sc. . . .    | rs2018088. . . .            |       |
| . ENST0000.      | 10q. | . Score=0.9! | . . . .                     |       |
| . ENST0000.      | 10q. | . Score=0.9! | rs3128226 . . . .           | 0.524 |
| . ENST0000.      | 10q. | . . . .      | . . . .                     |       |
| . ENST0000.      | 10q. | . . . .      | Score. . . .                |       |
| . ENST0000.      | 10q. | Sc. . . .    | rs5495128 . . . .           | 0.001 |
| CPXM2 ENST0000.  | 10q. | Sc. . . .    | . . . .                     |       |
| . ENST0000.      | 11p. | . . . .      | . . . .                     |       |
| . ENST0000.      | 11q. | Sc. . . .    | . . . .                     |       |
| . ENST0000.      | 11q. | . Score=0.9! | Score. . . .                |       |
| . ENST0000.      | 12p. | . Score=0.9! | rs7827727 ID: . . . .       |       |
| . ENST0000.      | 12p. | . . . .      | . . . .                     |       |
| CHD4: ENST0000.  | 12p. | Sc. . . .    | . . . .                     |       |
| . ENST0000.      | 12p. | . . . .      | . . . .                     |       |
| . ENST0000.      | 12p. | . Score=0.9! | . . . .                     |       |
| KRAS: ENST0000.  | 12p. | Sc. . . .    | rs1219135 ID: Patho . . . . |       |
| ITPR2: ENST0000. | 12p. | . . . .      | rs3731379 . . . .           |       |
| . ENST0000.      | 12p. | . Score=0.9! | rs4031316 ID: . . . .       |       |
| PUS7L ENST0000.  | 12q. | . . . .      | rs5661873 ID: . . . .       |       |
| FAM18 ENST0000.  | 12q. | . . . .      | rs9815586 ID: . . . .       |       |
| . ENST0000.      | 12q. | . . . .      | rs1409167. . . .            | 0.006 |
| . ENST0000.      | 12q. | . . . .      | . . . .                     |       |
| . ENST0000.      | 12q. | . . . .      | Score rs1707911 . . . .     | 0.268 |
| DDX51 ENST0000.  | 12q. | . . . .      | rs7662808. . . .            |       |
| . ENST0000.      | 13q. | . Score=0.9! | rs9079318. . . .            |       |
| . ENST0000.      | 13q. | . . . .      | . . . .                     |       |
| FLT3:N ENST0000. | 13q. | Sc. . . .    | rs7666774 . . . .           |       |
| DCLK1 ENST0000.  | 13q. | . . . .      | ID: . . . .                 |       |
| . ENST0000.      | 13q. | . Score=0.9! | . . . .                     |       |
| . ENST0000.      | 14q. | . Score=0.9! | rs2018046 ID: . . . .       |       |
| . ENST0000.      | 14q. | . Score=0.9! | rs4982820 . . . .           |       |
| . . . .          | 14q. | . Score=0.9! | Score rs2005137. . . .      |       |
| . ENST0000.      | 14q. | . Score=0.9! | . . . .                     |       |
| . ENST0000.      | 14q. | . Score=0.9! | Score. . . .                |       |
| . ENST0000.      | 14q. | . Score=0.9! | rs3763109. . . .            |       |
| . ENST0000.      | 14q. | . . . .      | . . . .                     |       |
| . ENST0000.      | 14q. | . . . .      | rs7592315 . . . .           |       |
| . . . .          | 14q. | . Score=0.9! | Score. . . .                |       |
| . ENST0000.      | 14q. | . Score=0.9! | rs7473295 ID: . . . .       |       |
| . . . .          | 15q. | . Score=0.9! | rs5686085 . . . .           | 0.001 |
| . ENST0000.      | 15q. | . Score=0.9! | Score rs5761409 ID: . . . . |       |
| . . . .          | 15q. | . Score=0.9! | Score rs3684417. . . .      |       |



|             |           |             |               |               |                      |
|-------------|-----------|-------------|---------------|---------------|----------------------|
| . ENST0000. | 15q.      | . Score=0.9 | rs1130343     | . . . . .     |                      |
| . ENST0000. | 15q.      | . Score=0.9 | rs1995519     | . . . . .     |                      |
| . ENST0000. | 15q.      | . Score=0.9 | rs1836337     | . . . . .     |                      |
| . . . . .   | 15q.      | . Score=0.9 | rs3700524     | . . . . .     |                      |
| . ENST0000. | 15q.      | . Score=0.9 | rs3766397     | . . . . .     |                      |
| . ENST0000. | 15q.      | . Score=0.9 | .             | . . . . .     |                      |
| SPINT1      | ENST0000. | 15q.        | Score         | rs5573362     | . . . . .            |
| . ENST0000. | 15q.      | . . . . .   | Score.        | . . . . .     |                      |
| GOLG/       | ENST0000. | 15q.        | Score=0.9     | rs7443087     | ID: . . . . .        |
| . ENST0000. | 15q.      | . Score=0.9 | .             | . . . . .     |                      |
| IFT140      | ENST0000. | 16p.        | . . . . .     | . . . . .     |                      |
| IL32:NM     | ENST0000. | 16p.        | . . . . .     | . . . . .     |                      |
| . ENST0000. | 16p.      | . . . . .   | . . . . .     | . . . . .     |                      |
| . ENST0000. | 16p.      | . Score=0.9 | .             | . . . . .     |                      |
| . . . . .   | 16q.      | . . . . .   | Score         | rs2887413     | ID: . . . . .        |
| . . . . .   | 16q.      | . . . . .   | Score         | rs4966607     | . . . . .            |
| . . . . .   | 16q.      | . . . . .   | Score         | rs4359628     | . . . . .            |
| . . . . .   | 16q.      | . . . . .   | Score         | rs4249500     | ID: . . . . .        |
| . . . . .   | 16q.      | . . . . .   | Score         | rs4372866     | ID: . . . . .        |
| . . . . .   | 16q.      | . . . . .   | Score         | rs4396558     | ID: . . . . .        |
| . . . . .   | 16q.      | . . . . .   | Score         | rs4249160     | . . . . .            |
| . . . . .   | 16q.      | . . . . .   | Score         | rs4967780     | ID: . . . . .        |
| . . . . .   | 16q.      | . . . . .   | Score         | rs7203681     | . . . . .            |
| . . . . .   | 16q.      | . . . . .   | Score         | rs7826866     | . . . . .            |
| . . . . .   | 16q.      | . . . . .   | Score         | rs4249045     | . . . . .            |
| . . . . .   | 16q.      | . . . . .   | Score         | rs7188365     | ID: . . . . .        |
| . . . . .   | 16q.      | . . . . .   | Score         | rs9972801     | . . . . .            |
| . . . . .   | 16q.      | . . . . .   | Score         | rs4249048     | . . . . .            |
| . . . . .   | 16q.      | . . . . .   | Score         | rs7823469     | ID: . . . . .        |
| . . . . .   | 16q.      | . . . . .   | rs1393031     | ID: . . . . . |                      |
| . . . . .   | 16q.      | . . . . .   | Score         | rs4090116     | . . . . .            |
| . . . . .   | 16q.      | . . . . .   | Score         | rs4090115     | ID: . . . . .        |
| . . . . .   | 16q.      | . . . . .   | Score         | rs4459567     | . . . . .            |
| . . . . .   | 16q.      | . . . . .   | Score         | rs6133865     | . . . . .            |
| . . . . .   | 16q.      | . . . . .   | Score         | rs4341908     | . . . . .            |
| . . . . .   | 16q.      | . . . . .   | Score         | rs4451975     | . . . . .            |
| . . . . .   | 16q.      | . . . . .   | Score         | rs7187636     | ID: . . . . .        |
| . ENST0000. | 16q.      | . Score=0.9 | .             | . . . . .     |                      |
| PDPR:I      | ENST0000. | 16q.        | Score=0.9     | rs2004697     | ID: not pri. . . . . |
| . ENST0000. | 16q.      | . Score     | .             | . . . . .     |                      |
| FANCA       | ENST0000. | 16q.        | . . . . .     | . . . . .     |                      |
| . ENST0000. | 16q.      | . . . . .   | Score.        | . . . . .     |                      |
| . ENST0000. | 17p.      | . . . . .   | Score.        | . . . . .     |                      |
| . ENST0000. | 17p.      | . . . . .   | . . . . .     | . . . . .     |                      |
| . ENST0000. | 17p.      | . . . . .   | . . . . .     | . . . . .     |                      |
| . . . . .   | 17p.      | . . . . .   | Score         | rs1440233     | ID: . . . . .        |
| . . . . .   | 17p.      | . . . . .   | Score         | rs4362423     | ID: . . . . .        |
| . . . . .   | 17q.      | . Score=0.9 | rs1409172     | ID: . . . . . | 0.223                |
| . . . . .   | 17q.      | . Score=0.9 | rs3737234     | . . . . .     | 0.212                |
| ARHG/       | ENST0000. | 17q.        | Score=0.9     | ID: . . . . . | . . . . .            |
| . ENST0000. | 17q.      | . Score=0.9 | ID: . . . . . | . . . . .     | . . . . .            |
| . ENST0000. | 17q.      | . . . . .   | Score         | rs8679073     | ID: . . . . .        |
| . . . . .   | 17q.      | . . . . .   | Score.        | . . . . .     | . . . . .            |
| . ENST0000. | 17q.      | . . . . .   | Score.        | . . . . .     | . . . . .            |

|        |           |      |     |   |                                |   |   |       |
|--------|-----------|------|-----|---|--------------------------------|---|---|-------|
| CACNC  | ENST0000. | 17q. | .   | . | rs7651139 ID.                  | . | . | .     |
| .      | ENST0000. | 17q. | .   | . | rs7754213.                     | . | . | .     |
| .      | ENST0000. | 17q. | .   | . | .                              | . | . | .     |
| .      | ENST0000. | 17q. | .   | . | rs5408783.                     | . | . | .     |
| CCDC1  | ENST0000. | 17q. | .   | . | .                              | . | . | .     |
| .      | ENST0000. | 17q. | .   | . | ID.                            | . | . | .     |
| .      | ENST0000. | 17q. | .   | . | rs3732207.                     | . | . | .     |
| CIDEA: | ENST0000. | 18p. | .   | . | .                              | . | . | .     |
| SEMA6  | ENST0000. | 19p. | .   | . | rs7575217.                     | . | . | .     |
| .      | ENST0000. | 19p. | .   | . | .                              | . | . | .     |
| .      | ENST0000. | 19p. | .   | . | .                              | . | . | .     |
| .      | ENST0000. | 19p. | .   | . | .                              | . | . | .     |
| .      | .         | 19p. | .   | . | Score=0.9† Score rs1492924 ID. | . | . | .     |
| .      | ENST0000. | 19q. | .   | . | Score rs1999730 ID.            | . | . | .     |
| .      | .         | 19q. | .   | . | Score=0.9† Score rs3762437.    | . | . | .     |
| .      | .         | 19q. | .   | . | Score=0.9† Score rs7125437.    | . | . | .     |
| SPTBN  | ENST0000. | 19q. | .   | . | Score.                         | . | . | .     |
| .      | ENST0000. | 19q. | .   | . | Score.                         | . | . | .     |
| .      | ENST0000. | 19q. | .   | . | Score=0.9† ID.                 | . | . | .     |
| PLA2G  | ENST0000. | 19q. | .   | . | .                              | . | . | .     |
| .      | ENST0000. | 19q. | .   | . | Score=0.9† rs6212787 ID.       | . | . | .     |
| .      | ENST0000. | 19q. | .   | . | Score.                         | . | . | .     |
| .      | ENST0000. | 19q. | .   | . | Score=0.9† rs5492748.          | . | . | .     |
| .      | .         | 19q. | .   | . | ID.                            | . | . | .     |
| PRKCC  | ENST0000. | 19q. | .   | . | rs7600928 ID.                  | . | . | .     |
| .      | ENST0000. | 19q. | .   | . | .                              | . | . | .     |
| ZNF814 | ENST0000. | 19q. | .   | . | Score=0.9† rs7704038.          | . | . | .     |
| .      | ENST0000. | 19q. | .   | . | .                              | . | . | .     |
| .      | ENST0000. | 20p. | Sc. | . | .                              | . | . | .     |
| .      | ENST0000. | 20p. | .   | . | .                              | . | . | .     |
| .      | ENST0000. | 20p. | .   | . | Score=0.9†.                    | . | . | .     |
| .      | ENST0000. | 20q. | .   | . | Score=0.9† rs9569348 ID.       | . | . | .     |
| .      | ENST0000. | 20q. | .   | . | .                              | . | . | .     |
| .      | ENST0000. | 21p. | .   | . | Score=0.9† Score rs3772733.    | . | . | .     |
| .      | ENST0000. | 21p. | .   | . | Score=0.9† rs9184726 ID.       | . | . | .     |
| .      | .         | 21p. | .   | . | Score=0.9† rs9266067.          | . | . | .     |
| .      | .         | 21p. | .   | . | Score=0.9† Score.              | . | . | .     |
| .      | ENST0000. | 21q. | .   | . | .                              | . | . | .     |
| .      | ENST0000. | 21q. | .   | . | Score rs7967544 ID.            | . | . | .     |
| .      | ENST0000. | 22q. | .   | . | Score=0.9† rs2019683.          | . | . | .     |
| .      | ENST0000. | 22q. | .   | . | rs7543647.                     | . | . | .     |
| .      | ENST0000. | 22q. | .   | . | rs5711604.                     | . | . | 0.005 |
| .      | ENST0000. | 22q. | .   | . | Score=0.9† rs1856371 ID.       | . | . | 0.016 |
| MCM5:  | ENST0000. | 22q. | Sc. | . | rs3713772 ID.                  | . | . | .     |
| .      | ENST0000. | 22q. | .   | . | .                              | . | . | .     |
| .      | ENST0000. | 22q. | .   | . | .                              | . | . | .     |
| .      | ENST0000. | 22q. | .   | . | .                              | . | . | .     |
| .      | .         | Xp2. | .   | . | Score=0.9† Score rs6644312.    | . | . | .     |
| .      | ENST0000. | Xp2. | .   | . | Score rs2010857.               | . | . | 0.028 |
| WWC3   | ENST0000. | Xp2. | .   | . | ID.                            | . | . | .     |
| SRPX:  | ENST0000. | Xp1. | .   | . | rs7457127 ID.                  | . | . | .     |
| .      | ENST0000. | Xp1. | .   | . | .                              | . | . | .     |
| CACNA  | ENST0000. | Xp1. | .   | . | rs7825308 ID.                  | . | . | .     |

|        |           |      |     |           |                     |     |   |       |
|--------|-----------|------|-----|-----------|---------------------|-----|---|-------|
| .      | .         | Xq1. | .   | Score.    | .                   | .   | . | .     |
| .      | .         | Xq1. | .   | Score.    | ID:                 | .   | . | .     |
| .      | .         | Xq1. | .   | Score     | rs7756689.          | .   | . | .     |
| .      | ENST0000. | Xq1. | .   | .         | rs2486782 ID:       | .   | . | 0.005 |
| AMOT:  | ENST0000. | Xq2. | .   | .         | ID:                 | .   | . | .     |
| C1GAL  | ENST0000. | Xq2. | Sc. | .         | .                   | .   | . | .     |
| .      | .         | Xq2. | .   | .         | .                   | .   | . | .     |
| .      | ENST0000. | Xq2. | .   | .         | rs1016097.          | .   | . | .     |
| .      | ENST0000. | Xq2. | .   | .         | .                   | .   | . | .     |
| .      | ENST0000. | Xq2. | .   | Score=0.9 | rs7802961 ID:       | .   | . | .     |
| .      | .         | .    | .   | .         | .                   | .   | . | .     |
| .      | .         | .    | .   | .         | rs3868289.          | .   | . | .     |
| .      | .         | .    | .   | .         | .                   | .   | . | .     |
| ATAD3  | ENST0000. | 1p3. | Sc. | .         | rs7466465.          | .   | . | .     |
| .      | ENST0000. | 1p3. | .   | Score=0.9 | Score.              | .   | . | .     |
| FBXO2  | ENST0000. | 1p3. | Sc. | .         | rs1454709.          | .   | . | .     |
| MAD2L  | ENST0000. | 1p3. | Sc. | .         | .                   | .   | . | .     |
| .      | ENST0000. | 1p3. | .   | Score=0.9 | rs1440990.          | .   | . | .     |
| .      | .         | 1p3. | .   | Score=0.9 | Score rs1157686 ID: | .   | . | 0.096 |
| .      | .         | 1p3. | .   | Score=0.9 | .                   | .   | . | .     |
| .      | ENST0000. | 1p3. | .   | Score=0.9 | rs7511577 ID:       | .   | . | .     |
| SH2D5  | ENST0000. | 1p3. | .   | .         | ID:                 | .   | . | .     |
| .      | ENST0000. | 1p3. | .   | .         | Score rs5551428.    | .   | . | .     |
| GRHL3  | ENST0000. | 1p3. | .   | .         | rs1422489 ID:       | .   | . | 0.001 |
| .      | ENST0000. | 1p3. | .   | Score=0.9 | Score.              | .   | . | .     |
| .      | ENST0000. | 1p3. | Sc. | .         | .                   | .   | . | .     |
| UNKNC  | ENST0000. | 1p3. | .   | .         | rs7753177 ID:       | .   | . | .     |
| SNIP1: | ENST0000. | 1p3. | .   | .         | .                   | .   | . | .     |
| MACF1  | ENST0000. | 1p3. | .   | .         | .                   | .   | . | .     |
| .      | ENST0000. | 1p3. | .   | .         | .                   | .   | . | .     |
| .      | ENST0000. | 1p3. | .   | .         | .                   | .   | . | .     |
| .      | ENST0000. | 1p3. | .   | .         | .                   | .   | . | .     |
| .      | ENST0000. | 1p3. | .   | .         | Score.              | ID: | . | .     |
| KLF17: | ENST0000. | 1p3. | Sc  | Score=0.9 | rs7580073.          | .   | . | .     |
| .      | .         | 1p3. | .   | Score=0.9 | Score rs8662033 ID: | .   | . | .     |
| .      | ENST0000. | 1p3. | .   | .         | Score.              | .   | . | .     |
| .      | ENST0000. | 1p3. | .   | .         | .                   | .   | . | .     |
| .      | ENST0000. | 1p3. | .   | .         | .                   | .   | . | .     |
| .      | ENST0000. | 1p3. | .   | .         | Score.              | .   | . | .     |
| .      | ENST0000. | 1p2. | .   | .         | .                   | .   | . | .     |
| .      | ENST0000. | 1p2. | .   | .         | .                   | .   | . | .     |
| .      | ENST0000. | 1p2. | .   | .         | .                   | .   | . | .     |
| .      | ENST0000. | 1p1. | .   | .         | rs7598590.          | .   | . | .     |
| LOC64: | ENST0000. | 1p1. | .   | .         | .                   | .   | . | .     |
| .      | ENST0000. | 1p1. | .   | Score=0.9 | rs2004173 ID:       | .   | . | .     |
| .      | ENST0000. | 1q2. | .   | Score=0.9 | rs1043712.          | .   | . | .     |
| .      | .         | 1q2. | .   | Score=0.9 | .                   | .   | . | .     |
| .      | ENST0000. | 1q2. | .   | Score=0.9 | Score rs2002777.    | .   | . | .     |
| .      | ENST0000. | 1q2. | .   | Score=0.9 | rs7506054.          | .   | . | .     |
| .      | ENST0000. | 1q2. | .   | Score=0.9 | rs1694653.          | .   | . | .     |
| .      | ENST0000. | 1q2. | .   | Score=0.9 | rs4125366 ID:       | .   | . | .     |
| .      | ENST0000. | 1q2. | .   | Score=0.9 | .                   | .   | . | .     |
| .      | ENST0000. | 1q2. | .   | Score=0.9 | .                   | .   | . | .     |
| .      | ENST0000. | 1q2. | .   | Score=0.9 | rs6181199 ID:       | .   | . | .     |

|         |           |      |           |                     |               |   |       |
|---------|-----------|------|-----------|---------------------|---------------|---|-------|
| .       | .         | 1q2. | Score=0.9 | rs8799948.          | .             | . | .     |
| .       | ENST0000. | 1q2. | Score=0.9 | rs482979            | .             | . | .     |
| .       | ENST0000. | 1q2. | Score=0.9 | rs2021032.          | .             | . | .     |
| .       | ENST0000. | 1q2. | Score=0.9 | rs2009700 ID.       | .             | . | .     |
| .       | ENST0000. | 1q2. | Score=0.9 | Score rs2003739.    | .             | . | .     |
| .       | ENST0000. | 1q2. | Score=0.9 | Score rs3705433.    | .             | . | .     |
| .       | ENST0000. | 1q2. | Score=0.9 | rs226753 ID.        | .             | . | .     |
| .       | ENST0000. | 1q2. | Score=0.9 | .                   | .             | . | .     |
| .       | ENST0000. | 1q2. | Score=0.9 | rs2787777 ID.       | .             | . | 0.325 |
| .       | .         | 1q2. | Score=0.9 | rs3750007.          | .             | . | .     |
| .       | ENST0000. | 1q2. | .         | .                   | .             | . | .     |
| .       | ENST0000. | 1q2. | .         | .                   | .             | . | .     |
| .       | ENST0000. | 1q2. | .         | .                   | .             | . | .     |
| SLC50/  | ENST0000. | 1q2. | .         | .                   | .             | . | .     |
| .       | ENST0000. | 1q2. | .         | .                   | .             | . | .     |
| .       | ENST0000. | 1q2. | .         | .                   | .             | . | .     |
| PEAR1   | ENST0000. | 1q2. | Sc.       | .                   | .             | . | .     |
| .       | ENST0000. | 1q2. | .         | .                   | .             | . | .     |
| ASPM:   | ENST0000. | 1q3. | .         | .                   | .             | . | .     |
| .       | ENST0000. | 1q3. | .         | Score rs1997462.    | .             | . | .     |
| PLEKH   | ENST0000. | 1q3. | .         | rs3692540.          | .             | . | .     |
| C1orf1' | ENST0000. | 1q4. | .         | .                   | .             | . | .     |
| CAPN2   | ENST0000. | 1q4. | .         | .                   | .             | . | .     |
| .       | ENST0000. | 1q4. | Score=0.9 | .                   | .             | . | .     |
| .       | ENST0000. | 1q4. | .         | rs7793949.          | .             | . | .     |
| .       | ENST0000. | 2p2. | .         | Score.              | .             | . | .     |
| .       | ENST0000. | 2p2. | .         | .                   | .             | . | .     |
| SF3B6:  | ENST0000. | 2p2. | .         | .                   | .             | . | .     |
| .       | ENST0000. | 2p2. | .         | .                   | .             | . | .     |
| .       | ENST0000. | 2p2. | .         | Score.              | .             | . | .     |
| SLC3A   | ENST0000. | 2p2. | .         | .                   | .             | . | .     |
| .       | ENST0000. | 2p2. | .         | .                   | .             | . | .     |
| .       | ENST0000. | 2p2. | .         | .                   | .             | . | .     |
| .       | ENST0000. | 2p1. | .         | .                   | .             | . | .     |
| .       | ENST0000. | 2p1. | .         | .                   | .             | . | .     |
| .       | ENST0000. | 2p1. | .         | .                   | ID.           | . | .     |
| .       | ENST0000. | 2p1. | Score=0.9 | rs3764475.          | .             | . | .     |
| PTCD3   | ENST0000. | 2p1. | .         | rs1425097.          | .             | . | .     |
| .       | ENST0000. | 2p1. | .         | .                   | .             | . | .     |
| .       | ENST0000. | 2p1. | .         | .                   | .             | . | .     |
| .       | ENST0000. | 2p1. | Sc        | Score=0.9           | rs8671368 ID. | . | .     |
| .       | ENST0000. | 2p1. | Score=0.9 | rs8674281 ID.       | .             | . | .     |
| .       | ENST0000. | 2p1. | Score=0.9 | .                   | .             | . | .     |
| .       | .         | 2p1. | Score=0.9 | Score rs1210470 ID. | .             | . | .     |
| .       | .         | 2q1. | .         | Score rs2015850 ID. | .             | . | .     |
| SLC9A:  | ENST0000. | 2q1. | .         | .                   | ID.           | . | .     |
| .       | ENST0000. | 2q1. | .         | .                   | .             | . | .     |
| .       | ENST0000. | 2q1. | .         | .                   | .             | . | .     |
| .       | ENST0000. | 2q1. | .         | rs6216365.          | .             | . | 0.378 |
| .       | ENST0000. | 2q1. | Sc        | Score.              | .             | . | .     |
| .       | ENST0000. | 2q2. | Score=0.9 | .                   | .             | . | .     |
| POTEF   | ENST0000. | 2q2. | Score=0.9 | rs1839843 ID.       | .             | . | 0.688 |
| .       | ENST0000. | 2q2. | Score=0.9 | Score rs2001821.    | .             | . | .     |
| .       | ENST0000. | 2q2. | Score=0.9 | .                   | .             | . | .     |

|                  |      |     |           |                     |   |     |   |   |   |
|------------------|------|-----|-----------|---------------------|---|-----|---|---|---|
| . ENST0000.      | 2q2. | .   | .         | .                   | . | .   | . | . | . |
| . ENST0000.      | 2q2. | .   | .         | .                   | . | .   | . | . | . |
| . ENST0000.      | 2q3. | .   | .         | .                   | . | .   | . | . | . |
| CCDC1 ENST0000.  | 2q3. | .   | .         | .                   | . | ID. | . | . | . |
| . ENST0000.      | 2q3. | .   | .         | .                   | . | .   | . | . | . |
| . ENST0000.      | 2q3. | .   | .         | Score.              | . | .   | . | . | . |
| . ENST0000.      | 2q3. | .   | .         | .                   | . | .   | . | . | . |
| SP140: ENST0000. | 2q3. | .   | .         | .                   | . | .   | . | . | . |
| . ENST0000.      | 2q3. | .   | .         | .                   | . | .   | . | . | . |
| . ENST0000.      | 2q3. | .   | .         | .                   | . | .   | . | . | . |
| . ENST0000.      | 3p2. | .   | Score=0.8 | Score.              | . | .   | . | . | . |
| . ENST0000.      | 3p2. | .   | .         | .                   | . | .   | . | . | . |
| . ENST0000.      | 3p2. | .   | .         | .                   | . | .   | . | . | . |
| . ENST0000.      | 3p2. | .   | .         | .                   | . | .   | . | . | . |
| DYNC1 ENST0000.  | 3p2. | Sc. | .         | .                   | . | .   | . | . | . |
| . ENST0000.      | 3p2. | .   | .         | .                   | . | .   | . | . | . |
| . ENST0000.      | 3p2. | .   | .         | .                   | . | .   | . | . | . |
| NDUFA ENST0000.  | 3p2. | .   | .         | .                   | . | .   | . | . | . |
| NPRL2 ENST0000.  | 3p2. | Sc. | .         | .                   | . | .   | . | . | . |
| . ENST0000.      | 3p2. | Sc. | .         | .                   | . | .   | . | . | . |
| . ENST0000.      | 3p2. | .   | .         | rs7801345.          | . | .   | . | . | . |
| ITIH3: ENST0000. | 3p2. | .   | .         | rs3677973.          | . | .   | . | . | . |
| . ENST0000.      | 3p1. | .   | .         | rs7454520.          | . | .   | . | . | . |
| . ENST0000.      | 3q1. | .   | .         | .                   | . | .   | . | . | . |
| . ENST0000.      | 3q1. | .   | .         | rs1911937.          | . | .   | . | . | . |
| ZNF80: ENST0000. | 3q1. | .   | .         | .                   | . | .   | . | . | . |
| GPR15 ENST0000.  | 3q1. | .   | .         | .                   | . | .   | . | . | . |
| . ENST0000.      | 3q2. | .   | .         | .                   | . | .   | . | . | . |
| H1FX: ENST0000.  | 3q2. | .   | .         | .                   | . | .   | . | . | . |
| . ENST0000.      | 3q2. | .   | .         | .                   | . | .   | . | . | . |
| MBD4: ENST0000.  | 3q2. | .   | .         | .                   | . | .   | . | . | . |
| . ENST0000.      | 3q2. | .   | .         | .                   | . | .   | . | . | . |
| COL6A ENST0000.  | 3q2. | .   | .         | .                   | . | .   | . | . | . |
| ATP2C ENST0000.  | 3q2. | .   | .         | .                   | . | .   | . | . | . |
| . ENST0000.      | 3q2. | .   | .         | rs1469630.          | . | .   | . | . | . |
| FOXL2 ENST0000.  | 3q2. | Sc. | .         | .                   | . | .   | . | . | . |
| GRK7: ENST0000.  | 3q2. | .   | .         | ID.                 | . | .   | . | . | . |
| . ENST0000.      | 3q2. | .   | .         | .                   | . | .   | . | . | . |
| . ENST0000.      | 3q2. | .   | .         | rs7613736.          | . | .   | . | . | . |
| . ENST0000.      | 3q2. | .   | .         | .                   | . | .   | . | . | . |
| . ENST0000.      | 3q2. | .   | .         | .                   | . | .   | . | . | . |
| SLC2A: ENST0000. | 3q2. | .   | .         | .                   | . | .   | . | . | . |
| FNDC3 ENST0000.  | 3q2. | .   | .         | .                   | . | .   | . | . | . |
| HTR3E ENST0000.  | 3q2. | .   | .         | .                   | . | .   | . | . | . |
| . ENST0000.      | 3q2. | .   | .         | Score.              | . | .   | . | . | . |
| . ENST0000.      | 3q2. | .   | .         | .                   | . | .   | . | . | . |
| . ENST0000.      | 3q2. | .   | .         | .                   | . | .   | . | . | . |
| . .              | 3q2. | .   | Score=0.9 | Score rs8795450.    | . | .   | . | . | . |
| . .              | 3q2. | .   | Score=0.9 | Score.              | . | .   | . | . | . |
| . ENST0000.      | 3q2. | .   | Score=0.9 | rs4927838 ID.       | . | .   | . | . | . |
| . ENST0000.      | 3q2. | Sc  | Score=0.9 | rs1739998 ID.       | . | .   | . | . | . |
| . ENST0000.      | 4p1. | .   | .         | Score rs4022005 ID. | . | .   | . | . | . |
| SLC26: ENST0000. | 4p1. | .   | .         | rs7518089.          | . | .   | . | . | . |
| PPARG ENST0000.  | 4p1. | .   | .         | rs7529426.          | . | .   | . | . | . |

|        |           |      |           |                 |           |  |       |
|--------|-----------|------|-----------|-----------------|-----------|--|-------|
|        |           | 4p1. | Score=0.9 |                 |           |  |       |
|        | ENST0000. | 4p1. |           |                 |           |  |       |
| LIMCH  | ENST0000. | 4p1. |           |                 |           |  |       |
|        |           | 4p1. | Score=0.9 | rs7541707       | ID.       |  |       |
|        | ENST0000. | 4q1. |           |                 |           |  |       |
|        | ENST0000. | 4q1. |           | rs5423520       |           |  | 0.001 |
|        | ENST0000. | 4q2. |           |                 |           |  |       |
|        | ENST0000. | 4q2. | Score=0.9 | rs8789415       | ID.       |  |       |
|        | ENST0000. | 4q2. |           | rs8900187       |           |  |       |
|        | ENST0000. | 4q2. |           |                 |           |  |       |
|        | ENST0000. | 4q2. |           | Score rs1378897 |           |  | 0.245 |
| PCDH1  | ENST0000. | 4q2. | Sc        |                 |           |  |       |
|        | ENST0000. | 4q3. | Score=0.9 | rs3676041       |           |  |       |
|        | ENST0000. | 4q3. |           |                 |           |  |       |
|        | ENST0000. | 4q3. |           |                 |           |  |       |
|        |           | 4q3. | Score.    | ID.             |           |  |       |
| PDCD6  | ENST0000. | 5p1. |           |                 |           |  |       |
|        | ENST0000. | 5p1. |           |                 |           |  |       |
|        | ENST0000. | 5p1. | Score=0.9 |                 |           |  |       |
|        | ENST0000. | 5q1. |           |                 |           |  |       |
|        | ENST0000. | 5q1. |           |                 |           |  |       |
|        | ENST0000. | 5q1. |           | Score.          |           |  |       |
|        |           | 5q1. |           | Score.          |           |  |       |
|        | ENST0000. | 5q1. | Score=0.9 |                 |           |  |       |
|        | ENST0000. | 5q1. | Score=0.9 | Score rs2848141 | ID.       |  |       |
|        | ENST0000. | 5q1. | Sc        |                 |           |  |       |
| HEXB:  | ENST0000. | 5q1. |           |                 |           |  |       |
| HSD17  | ENST0000. | 5q2. | Sc        |                 |           |  |       |
|        | ENST0000. | 5q3. |           |                 |           |  |       |
|        | ENST0000. | 5q3. |           |                 |           |  |       |
|        | ENST0000. | 5q3. |           | Score rs1024566 |           |  |       |
|        | ENST0000. | 5q3. |           |                 |           |  |       |
|        | ENST0000. | 5q3. |           | Score.          |           |  |       |
|        | ENST0000. | 5q3. |           |                 |           |  |       |
|        | ENST0000. | 5q3. |           | rs5341551       |           |  |       |
|        | ENST0000. | 5q3. |           |                 |           |  |       |
| CBY3:  | ENST0000. | 5q3. |           |                 |           |  |       |
| DUSP2  | ENST0000. | 6p2. |           | rs2013466       |           |  |       |
|        | ENST0000. | 6p2. |           | Score.          |           |  |       |
| CDYL:  | ENST0000. | 6p2. |           |                 |           |  |       |
| HIST1F | ENST0000. | 6p2. |           | rs7489137       |           |  |       |
| POM12  | ENST0000. | 6p2. |           |                 |           |  |       |
| POM12  | ENST0000. | 6p2. |           |                 |           |  |       |
|        | ENST0000. | 6p2. |           | rs9402071       |           |  |       |
| DHX16  | ENST0000. | 6p2. |           |                 |           |  |       |
|        | ENST0000. | 6p2. |           |                 |           |  |       |
|        | ENST0000. | 6p2. | Score=0.8 |                 |           |  |       |
|        | ENST0000. | 6p2. |           |                 |           |  |       |
| ZBTB1: | ENST0000. | 6p2. | Score=0.9 |                 |           |  |       |
| STK19: | ENST0000. | 6p2. | Sc        | Score=0.9       |           |  |       |
|        | ENST0000. | 6p2. |           | Score=0.9       | rs5421901 |  |       |
| UNKNC  | ENST0000. | 6p2. | Sc        | Score=0.9       |           |  |       |
|        | ENST0000. | 6p2. |           | Score=0.9       |           |  |       |
| ETV7:  | ENST0000. | 6p2. |           |                 |           |  |       |



|                   |      |     |           |        |                     |   |   |   |   |
|-------------------|------|-----|-----------|--------|---------------------|---|---|---|---|
| . ENST0000.       | 8q2. | .   | .         | .      | .                   | . | . | . | . |
| . ENST0000.       | 9p2. | .   | Score=0.9 | .      | .                   | . | . | . | . |
| HAUS6 ENST0000.   | 9p2. | .   | .         | .      | rs7682516.          | . | . | . | . |
| IFNB1:  ENST0000. | 9p2. | .   | .         | .      | .                   | . | . | . | . |
| UBAP2 ENST0000.   | 9p1. | .   | .         | .      | .                   | . | . | . | . |
| . ENST0000.       | 9p1. | .   | Score=0.9 | .      | rs3764507 ID.       | . | . | . | . |
| . ENST0000.       | 9p1. | .   | Score=0.9 | .      | .                   | . | . | . | . |
| . ENST0000.       | 9q1. | .   | Score=0.9 | .      | .                   | . | . | . | . |
| . ENST0000.       | 9q2. | .   | Score=0.9 | .      | .                   | . | . | . | . |
| . ENST0000.       | 9q2. | .   | .         | .      | .                   | . | . | . | . |
| . ENST0000.       | 9q2. | .   | .         | .      | .                   | . | . | . | . |
| . ENST0000.       | 9q2. | .   | .         | .      | .                   | . | . | . | . |
| ERCC6 ENST0000.   | 9q2. | Sc. | .         | .      | .                   | . | . | . | . |
| . ENST0000.       | 9q3. | .   | .         | .      | rs9619494.          | . | . | . | . |
| DAB2IF ENST0000.  | 9q3. | .   | .         | .      | .                   | . | . | . | . |
| LMX1B ENST0000.   | 9q3. | .   | .         | .      | .                   | . | . | . | . |
| . ENST0000.       | 9q3. | .   | .         | .      | .                   | . | . | . | . |
| . ENST0000.       | 9q3. | .   | .         | .      | rs7589091 .         | . | . | . | . |
| . ENST0000.       | 9q3. | .   | .         | .      | .                   | . | . | . | . |
| . ENST0000.       | 9q3. | .   | .         | .      | .                   | . | . | . | . |
| . ENST0000.       | 9q3. | .   | .         | .      | .                   | . | . | . | . |
| UNKN ENST0000.    | 9q3. | .   | .         | .      | .                   | . | . | . | . |
| UPF2:  ENST0000.  | 10p. | .   | .         | .      | .                   | . | . | . | . |
| SKIDA' ENST0000.  | 10p. | .   | .         | .      | Score rs2018361 ID. | . | . | . | . |
| . ENST0000.       | 10q. | .   | .         | .      | .                   | . | . | . | . |
| . ENST0000.       | 10q. | .   | .         | .      | .                   | . | . | . | . |
| . ENST0000.       | 10q. | .   | .         | .      | .                   | . | . | . | . |
| HKDC1 ENST0000.   | 10q. | .   | .         | .      | rs3760330.          | . | . | . | . |
| . ENST0000.       | 10q. | .   | .         | .      | .                   | . | . | . | . |
| . ENST0000.       | 10q. | .   | .         | .      | .                   | . | . | . | . |
| UNC5B ENST0000.   | 10q. | Sc. | .         | .      | rs7593379.          | . | . | . | . |
| CDH23 ENST0000.   | 10q. | .   | .         | .      | rs7698966 ID.       | . | . | . | . |
| . . .             | 10q. | .   | Score=0.9 | Score. | ID.                 | . | . | . | . |
| . . .             | 10q. | .   | Score=0.9 | Score. | ID.                 | . | . | . | . |
| . ENST0000.       | 10q. | .   | .         | .      | .                   | . | . | . | . |
| . ENST0000.       | 10q. | .   | .         | .      | .                   | . | . | . | . |
| . ENST0000.       | 10q. | .   | .         | .      | .                   | . | . | . | . |
| . ENST0000.       | 10q. | .   | Score=0.9 | .      | rs7966467.          | . | . | . | . |
| MUC6:  ENST0000.  | 11p. | .   | .         | .      | rs7657851 ID.       | . | . | . | . |
| . ENST0000.       | 11p. | .   | Score=0.9 | .      | rs8667539 ID.       | . | . | . | . |
| SBF2:  ENST0000.  | 11p. | .   | .         | .      | .                   | . | . | . | . |
| LUZP2: ENST0000.  | 11p. | .   | .         | .      | .                   | . | . | . | . |
| WT1:N ENST0000.   | 11p. | Sc. | .         | .      | .                   | . | . | . | . |
| DGKZ:  ENST0000.  | 11p. | Sc. | .         | .      | .                   | . | . | . | . |
| . ENST0000.       | 11p. | .   | .         | .      | .                   | . | . | . | . |
| . ENST0000.       | 11q. | .   | .         | .      | .                   | . | . | . | . |
| PPP1R ENST0000.   | 11q. | .   | .         | .      | rs7463740 ID.       | . | . | . | . |
| . ENST0000.       | 11q. | Sc. | .         | Score. | .                   | . | . | . | . |
| . ENST0000.       | 11q. | Sc. | .         | .      | .                   | . | . | . | . |
| RCOR2 ENST0000.   | 11q. | Sc. | .         | .      | rs3704854 ID.       | . | . | . | . |
| . ENST0000.       | 11q. | .   | .         | Score. | .                   | . | . | . | . |
| NUDT2 ENST0000.   | 11q. | .   | .         | .      | .                   | . | . | . | . |
| . ENST0000.       | 11q. | .   | .         | .      | .                   | . | . | . | . |
| FKBP2 ENST0000.   | 11q. | Sc. | .         | .      | .                   | . | . | . | . |



|        |           |      |     |             |   |                  |         |   |   |       |
|--------|-----------|------|-----|-------------|---|------------------|---------|---|---|-------|
| .      | ENST0000. | 11q. | .   | .           | . | .                | .       | . | . | .     |
| .      | ENST0000. | 11q. | .   | .           | . | .                | .       | . | . | .     |
| .      | ENST0000. | 11q. | .   | .           | . | rs7459229.       | .       | . | . | .     |
| P4HA3  | ENST0000. | 11q. | .   | .           | . | .                | .       | . | . | .     |
| .      | ENST0000. | 11q. | .   | .           | . | .                | .       | . | . | .     |
| .      | ENST0000. | 11q. | .   | Score=0.9i. | . | rs3521580.       | .       | . | . | .     |
| .      | ENST0000. | 11q. | .   | Score=0.9i. | . | rs3580670 ID.    | .       | . | . | .     |
| .      | ENST0000. | 11q. | .   | .           | . | rs9203240.       | .       | . | . | .     |
| ZBTB4  | ENST0000. | 11q. | Sc. | .           | . | .                | .       | . | . | .     |
| .      | ENST0000. | 12p. | .   | .           | . | .                | .       | . | . | .     |
| .      | ENST0000. | 12p. | .   | .           | . | .                | .       | . | . | .     |
| .      | ENST0000. | 12p. | .   | .           | . | .                | .       | . | . | .     |
| DDX11  | ENST0000. | 12p. | Sc  | Score=0.9i. | . | rs7123030 ID.    | .       | . | . | 0.131 |
| KIAA15 | ENST0000. | 12p. | .   | .           | . | .                | .       | . | . | .     |
| .      | ENST0000. | 12q. | .   | .           | . | .                | .       | . | . | .     |
| SCAF1  | ENST0000. | 12q. | .   | .           | . | .                | .       | . | . | .     |
| CYP27  | ENST0000. | 12q. | .   | .           | . | .                | .       | . | . | .     |
| .      | ENST0000. | 12q. | .   | .           | . | .                | .       | . | . | .     |
| .      | ENST0000. | 12q. | .   | .           | . | Score rs8674713. | .       | . | . | .     |
| .      | ENST0000. | 12q. | .   | .           | . | rs9109827.       | .       | . | . | .     |
| .      | ENST0000. | 12q. | .   | .           | . | Score rs9642294. | .       | . | . | .     |
| .      | ENST0000. | 12q. | .   | .           | . | .                | .       | . | . | .     |
| MYBPC  | ENST0000. | 12q. | .   | .           | . | .                | .       | . | . | .     |
| .      | ENST0000. | 12q. | .   | .           | . | Score.           | .       | . | . | .     |
| MED13  | ENST0000. | 12q. | .   | .           | . | .                | .       | . | . | .     |
| .      | ENST0000. | 12q. | .   | .           | . | .                | .       | . | . | .     |
| .      | ENST0000. | 12q. | .   | .           | . | rs7540482.       | .       | . | . | .     |
| .      | ENST0000. | 12q. | .   | .           | . | .                | .       | . | . | .     |
| .      | ENST0000. | 12q. | .   | .           | . | .                | .       | . | . | .     |
| .      | ENST0000. | 13q. | .   | .           | . | .                | .       | . | . | .     |
| NBEA1  | ENST0000. | 13q. | .   | .           | . | .                | .       | . | . | .     |
| EPST1  | ENST0000. | 13q. | Sc. | .           | . | .                | .       | . | . | .     |
| .      | ENST0000. | 13q. | .   | .           | . | .                | .       | . | . | .     |
| FGF14  | ENST0000. | 13q. | .   | .           | . | rs7720033.       | .       | . | . | .     |
| .      | ENST0000. | 14q. | .   | Score=0.9i. | . | rs1450473.       | .       | . | . | .     |
| .      | .         | 14q. | .   | .           | . | .                | .       | . | . | .     |
| .      | ENST0000. | 14q. | .   | Score=0.9i. | . | .                | .       | . | . | .     |
| .      | ENST0000. | 14q. | .   | Score=0.9i. | . | .                | .       | . | . | .     |
| .      | ENST0000. | 14q. | .   | .           | . | .                | .       | . | . | .     |
| .      | .         | 14q. | .   | .           | . | Score.           | .       | . | . | .     |
| GCH1   | ENST0000. | 14q. | .   | .           | . | rs1501582.       | Likely. | . | . | .     |
| .      | ENST0000. | 14q. | .   | .           | . | .                | .       | . | . | .     |
| .      | ENST0000. | 14q. | .   | .           | . | Score.           | .       | . | . | .     |
| .      | ENST0000. | 14q. | .   | .           | . | .                | .       | . | . | .     |
| SMOC   | ENST0000. | 14q. | .   | .           | . | rs7676169.       | .       | . | . | .     |
| PAPLN  | ENST0000. | 14q. | .   | .           | . | .                | .       | . | . | .     |
| .      | ENST0000. | 14q. | .   | .           | . | .                | .       | . | . | .     |
| .      | ENST0000. | 14q. | .   | .           | . | .                | .       | . | . | .     |
| .      | ENST0000. | 14q. | .   | .           | . | .                | .       | . | . | .     |
| .      | ENST0000. | 14q. | .   | .           | . | rs3756754.       | .       | . | . | .     |
| .      | ENST0000. | 14q. | .   | .           | . | .                | ID.     | . | . | .     |
| .      | ENST0000. | 14q. | .   | .           | . | rs5537870.       | .       | . | . | .     |
| .      | .         | 14q. | .   | Score=0.9i. | . | rs1289410 ID.    | .       | . | . | .     |

|                 |      |             |           |           |     |   |   |       |
|-----------------|------|-------------|-----------|-----------|-----|---|---|-------|
| . ENST0000.     | 15q. | . Score=0.9 | .         | .         | .   | . | . | .     |
| . ENST0000.     | 15q. | . Score=0.9 | Score.    | .         | .   | . | . | .     |
| HERC2 ENST0000. | 15q. | Sc.         | .         | rs5409237 | .   | . | . | .     |
| . ENST0000.     | 15q. | . Score=0.9 | .         | .         | .   | . | . | .     |
| . ENST0000.     | 15q. | . Score=0.9 | .         | .         | .   | . | . | .     |
| . ENST0000.     | 15q. | . Score=0.9 | .         | ID.       | .   | . | . | .     |
| . ENST0000.     | 15q. | . Score=0.9 | .         | rs2015085 | .   | . | . | .     |
| . ENST0000.     | 15q. | .           | .         | rs7481072 | .   | . | . | .     |
| . ENST0000.     | 15q. | .           | .         | .         | .   | . | . | .     |
| RPAP1 ENST0000. | 15q. | .           | .         | .         | .   | . | . | .     |
| SPTBN ENST0000. | 15q. | .           | .         | rs7754448 | .   | . | . | .     |
| . ENST0000.     | 15q. | . Score=0.9 | .         | .         | .   | . | . | .     |
| . ENST0000.     | 15q. | .           | .         | rs1922871 | .   | . | . | .     |
| . ENST0000.     | 15q. | .           | .         | .         | .   | . | . | .     |
| . ENST0000.     | 15q. | . Score=0.9 | .         | rs6202600 | .   | . | . | 0.422 |
| SPATA ENST0000. | 15q. | Sc.         | .         | ID.       | .   | . | . | .     |
| . ENST0000.     | 15q. | Sc.         | .         | .         | .   | . | . | .     |
| . ENST0000.     | 15q. | .           | .         | .         | .   | . | . | .     |
| . ENST0000.     | 15q. | .           | .         | rs5478938 | .   | . | . | .     |
| . ENST0000.     | 15q. | .           | .         | .         | .   | . | . | .     |
| . ENST0000.     | 15q. | . Score=0.9 | .         | .         | .   | . | . | .     |
| . ENST0000.     | 15q. | .           | .         | .         | .   | . | . | .     |
| . ENST0000.     | 15q. | . Score=0.9 | .         | .         | .   | . | . | .     |
| CHRNE ENST0000. | 15q. | Sc.         | .         | .         | .   | . | . | .     |
| ANKRC ENST0000. | 15q. | .           | .         | .         | .   | . | . | .     |
| . ENST0000.     | 15q. | . Score=0.9 | .         | rs2401418 | .   | . | . | .     |
| . ENST0000.     | 15q. | .           | .         | .         | .   | . | . | .     |
| VPS33 ENST0000. | 15q. | .           | .         | .         | .   | . | . | .     |
| . ENST0000.     | 15q. | .           | .         | .         | .   | . | . | .     |
| . ENST0000.     | 15q. | .           | .         | .         | .   | . | . | .     |
| TARSL ENST0000. | 15q. | .           | .         | rs7510253 | ID. | . | . | .     |
| UNKNC ENST0000. | 16p. | Sc.         | .         | rs7504825 | .   | . | . | .     |
| . ENST0000.     | 16p. | .           | .         | .         | .   | . | . | .     |
| . ENST0000.     | 16p. | .           | .         | .         | .   | . | . | .     |
| TEKT5 ENST0000. | 16p. | .           | .         | .         | .   | . | . | .     |
| TNFRS ENST0000. | 16p. | .           | .         | .         | .   | . | . | .     |
| . ENST0000.     | 16p. | . Score=0.9 | .         | .         | .   | . | . | .     |
| . ENST0000.     | 16p. | . Score=0.9 | .         | rs5522924 | .   | . | . | 0.034 |
| . ENST0000.     | 16p. | . Score=0.9 | .         | rs6203288 | ID. | . | . | 0.04  |
| SMG1: ENST0000. | 16p. | .           | .         | rs7654396 | .   | . | . | .     |
| . ENST0000.     | 16p. | .           | .         | Score.    | .   | . | . | .     |
| . ENST0000.     | 16p. | .           | .         | Score.    | .   | . | . | .     |
| . ENST0000.     | 16p. | Sc          | Score=0.9 | .         | .   | . | . | .     |
| XPO6: ENST0000. | 16p. | .           | .         | .         | .   | . | . | .     |
| . ENST0000.     | 16p. | .           | .         | .         | .   | . | . | .     |
| . ENST0000.     | 16p. | . Score=0.9 | .         | .         | .   | . | . | .     |
| . ENST0000.     | 16p. | .           | .         | .         | .   | . | . | .     |
| . ENST0000.     | 16p. | .           | .         | .         | .   | . | . | .     |
| . ENST0000.     | 16p. | . Score=0.9 | Score     | rs7896651 | .   | . | . | .     |
| . ENST0000.     | 16q. | .           | .         | rs7515102 | .   | . | . | .     |
| CNOT1 ENST0000. | 16q. | .           | .         | .         | .   | . | . | .     |
| CTCF: ENST0000. | 16q. | .           | .         | .         | .   | . | . | .     |
| . ENST0000.     | 16q. | .           | .         | .         | .   | . | . | .     |
| . ENST0000.     | 16q. | . Score=0.9 | .         | rs2911030 | ID. | . | . | .     |

|                  |      |     |           |           |     |     |
|------------------|------|-----|-----------|-----------|-----|-----|
| . ENST0000.      | 16q. | . . | Score.    | . .       | . . | . . |
| . ENST0000.      | 16q. | . . | Score=0.9 | . .       | ID. | . . |
| . ENST0000.      | 17p. | . . | . .       | rs7805194 | . . | . . |
| . ENST0000.      | 17p. | . . | . .       | . .       | . . | . . |
| TNFSF ENST0000.  | 17p. | Sc. | . .       | . .       | . . | . . |
| DNAH2 ENST0000.  | 17p. | Sc. | . .       | . .       | . . | . . |
| MYH13 ENST0000.  | 17p. | . . | . .       | . .       | . . | . . |
| DNAH9 ENST0000.  | 17p. | Sc. | . .       | . .       | ID. | . . |
| . ENST0000.      | 17p. | . . | . .       | rs5595610 | . . | . . |
| . ENST0000.      | 17p. | . . | . .       | . .       | . . | . . |
| . ENST0000.      | 17p. | . . | Score=0.9 | . .       | . . | . . |
| . ENST0000.      | 17p. | . . | Score=0.9 | . .       | . . | . . |
| . ENST0000.      | 17p. | . . | Score=0.9 | . .       | . . | . . |
| . ENST0000.      | 17p. | . . | Score=0.9 | rs7841783 | . . | . . |
| . ENST0000.      | 17q. | . . | . .       | . .       | . . | . . |
| . ENST0000.      | 17q. | . . | . .       | . .       | . . | . . |
| . ENST0000.      | 17q. | . . | . .       | . .       | . . | . . |
| SUZ12: ENST0000. | 17q. | . . | Score=0.9 | . .       | . . | . . |
| . ENST0000.      | 17q. | . . | Score=0.9 | . .       | . . | . . |
| . ENST0000.      | 17q. | . . | . .       | . .       | . . | . . |
| . ENST0000.      | 17q. | . . | Score=0.9 | . .       | . . | . . |
| . ENST0000.      | 17q. | . . | Score=0.9 | rs8795183 | . . | . . |
| . ENST0000.      | 17q. | . . | . .       | . .       | . . | . . |
| . ENST0000.      | 17q. | . . | . .       | . .       | . . | . . |
| . ENST0000.      | 17q. | . . | . .       | . .       | . . | . . |
| . ENST0000.      | 17q. | . . | Score=0.9 | . .       | . . | . . |
| MED1: ENST0000.  | 17q. | . . | . .       | . .       | . . | . . |
| . ENST0000.      | 17q. | . . | . .       | rs1035039 | . . | . . |
| . ENST0000.      | 17q. | . . | . .       | . .       | . . | . . |
| . ENST0000.      | 17q. | . . | . .       | . .       | . . | . . |
| . ENST0000.      | 17q. | . . | . .       | . .       | . . | . . |
| . ENST0000.      | 17q. | . . | . .       | . .       | . . | . . |
| . ENST0000.      | 17q. | . . | . .       | . .       | . . | . . |
| DDX42 ENST0000.  | 17q. | . . | . .       | . .       | . . | . . |
| DDX42 ENST0000.  | 17q. | . . | . .       | . .       | . . | . . |
| . ENST0000.      | 17q. | . . | Score.    | . .       | . . | . . |
| . ENST0000.      | 17q. | . . | . .       | . .       | . . | . . |
| SLC26 ENST0000.  | 17q. | . . | . .       | rs1405528 | . . | . . |
| BAIAP2 ENST0000. | 17q. | . . | . .       | . .       | . . | . . |
| . ENST0000.      | 17q. | . . | Score=0.9 | rs3677917 | . . | . . |
| . ENST0000.      | 18p. | . . | . .       | . .       | . . | . . |
| LRR3 ENST0000.   | 18p. | Sc. | . .       | . .       | . . | . . |
| PPP4R ENST0000.  | 18p. | . . | . .       | . .       | . . | . . |
| . ENST0000.      | 18p. | . . | . .       | . .       | . . | . . |
| PIEZO2 ENST0000. | 18p. | Sc. | . .       | . .       | . . | . . |
| RNMT: ENST0000.  | 18p. | Sc. | . .       | . .       | . . | . . |
| . ENST0000.      | 18p. | . . | Score=0.9 | Score.    | ID. | . . |
| . ENST0000.      | 18q. | . . | Score.    | . .       | . . | . . |
| SKOR2 ENST0000.  | 18q. | . . | Score.    | . .       | . . | . . |
| . ENST0000.      | 18q. | . . | . .       | . .       | . . | . . |
| . ENST0000.      | 18q. | . . | Score.    | . .       | . . | . . |
| . ENST0000.      | 18q. | . . | . .       | rs7468202 | . . | . . |
| CCDC1 ENST0000.  | 18q. | . . | . .       | . .       | . . | . . |
| . ENST0000.      | 18q. | . . | . .       | . .       | . . | . . |

|       |           |      |   |                 |                 |   |   |       |
|-------|-----------|------|---|-----------------|-----------------|---|---|-------|
| .     | .         | 19p. | . | rs9545783       | .               | . | . | .     |
| .     | ENST0000. | 19p. | . | .               | .               | . | . | .     |
| .     | ENST0000. | 19p. | . | .               | .               | . | . | .     |
| .     | ENST0000. | 19p. | . | .               | .               | . | . | .     |
| .     | ENST0000. | 19p. | . | rs3742787       | .               | . | . | .     |
| .     | ENST0000. | 19p. | . | Score rs1418930 | .               | . | . | 0.106 |
| THOP1 | ENST0000. | 19p. | . | .               | .               | . | . | .     |
| .     | ENST0000. | 19p. | . | rs7627736       | .               | . | . | .     |
| .     | ENST0000. | 19p. | . | Score.          | .               | . | . | .     |
| .     | ENST0000. | 19p. | . | .               | .               | . | . | .     |
| .     | ENST0000. | 19p. | . | .               | .               | . | . | .     |
| .     | ENST0000. | 19p. | . | .               | .               | . | . | .     |
| .     | ENST0000. | 19p. | . | Score.          | .               | . | . | .     |
| .     | ENST0000. | 19p. | . | Score.          | .               | . | . | .     |
| .     | ENST0000. | 19p. | . | .               | .               | . | . | .     |
| MUC16 | ENST0000. | 19p. | . | .               | .               | . | . | .     |
| MUC16 | ENST0000. | 19p. | . | .               | .               | . | . | .     |
| MUC16 | ENST0000. | 19p. | . | .               | ID.             | . | . | .     |
| MUC16 | ENST0000. | 19p. | . | rs7741875       | .               | . | . | .     |
| .     | ENST0000. | 19p. | . | Score.          | .               | . | . | .     |
| ZNF44 | ENST0000. | 19p. | . | .               | .               | . | . | .     |
| .     | ENST0000. | 19p. | . | .               | .               | . | . | .     |
| .     | ENST0000. | 19p. | . | .               | .               | . | . | .     |
| NWD1  | ENST0000. | 19p. | . | .               | .               | . | . | .     |
| FAM12 | ENST0000. | 19p. | . | rs7797020       | .               | . | . | .     |
| .     | ENST0000. | 19p. | . | Score.          | .               | . | . | .     |
| .     | ENST0000. | 19p. | . | .               | .               | . | . | .     |
| ZNF25 | ENST0000. | 19p. | . | .               | ID.             | . | . | .     |
| .     | ENST0000. | 19p. | . | Score=0.9       | .               | . | . | .     |
| .     | ENST0000. | 19q. | . | .               | .               | . | . | .     |
| .     | ENST0000. | 19q. | . | .               | .               | . | . | .     |
| .     | ENST0000. | 19q. | . | .               | .               | . | . | .     |
| .     | .         | 19q. | . | Score=0.9       | Score rs8683521 | . | . | .     |
| .     | .         | 19q. | . | Score=0.9       | Score rs8793125 | . | . | .     |
| ZNF85 | ENST0000. | 19q. | . | rs7653982       | ID.             | . | . | .     |
| .     | ENST0000. | 19q. | . | Score rs9896621 | .               | . | . | .     |
| .     | ENST0000. | 19q. | . | Score=0.9       | .               | . | . | .     |
| .     | ENST0000. | 19q. | . | rs1408143       | .               | . | . | 0.001 |
| .     | ENST0000. | 19q. | . | .               | .               | . | . | .     |
| .     | ENST0000. | 19q. | . | Score rs1444115 | .               | . | . | .     |
| .     | ENST0000. | 19q. | . | Score=0.9       | .               | . | . | .     |
| .     | ENST0000. | 19q. | . | Score.          | .               | . | . | .     |
| PLAUR | ENST0000. | 19q. | . | rs4251912       | .               | . | . | .     |
| NANO  | ENST0000. | 19q. | . | .               | .               | . | . | .     |
| .     | ENST0000. | 19q. | . | .               | .               | . | . | .     |
| .     | ENST0000. | 19q. | . | .               | .               | . | . | .     |
| ZNF61 | ENST0000. | 19q. | . | .               | .               | . | . | .     |
| .     | ENST0000. | 19q. | . | Score=0.9       | .               | . | . | .     |
| .     | .         | 19q. | . | Score=0.9       | .               | . | . | .     |
| NCR1  | ENST0000. | 19q. | . | .               | .               | . | . | .     |
| USP29 | ENST0000. | 19q. | . | .               | .               | . | . | .     |
| USP29 | ENST0000. | 19q. | . | .               | .               | . | . | .     |
| .     | ENST0000. | 20p. | . | .               | .               | . | . | .     |
| .     | ENST0000. | 20p. | . | .               | .               | . | . | .     |

|                  |      |     |                             |   |               |   |   |   |       |
|------------------|------|-----|-----------------------------|---|---------------|---|---|---|-------|
| . ENST0000.      | 20p. | .   | .                           | . | .             | . | . | . | .     |
| SIGLEC ENST0000. | 20p. | .   | .                           | . | .             | . | . | . | .     |
| PLCB1 ENST0000.  | 20p. | .   | .                           | . | rs7610831.    | . | . | . | .     |
| . ENST0000.      | 20p. | .   | .                           | . | .             | . | . | . | .     |
| . ENST0000HBI-43 | 20p. | .   | .                           | . | .             | . | . | . | .     |
| . ENST0000.      | 20q. | .   | Score=0.9f.                 | . | rs8120738 ID. | . | . | . | .     |
| . ENST0000.      | 20q. | .   | Score=0.9f.                 | . | rs7791580 ID. | . | . | . | 0.001 |
| . ENST0000.      | 20q. | .   | .                           | . | .             | . | . | . | .     |
| . ENST0000.      | 20q. | .   | .                           | . | .             | . | . | . | .     |
| NCOA6 ENST0000.  | 20q. | Sc. | .                           | . | rs1904867.    | . | . | . | 0.001 |
| RNF11 ENST0000.  | 20q. | Sc. | .                           | . | .             | . | . | . | .     |
| UNKNC ENST0000.  | 20q. | Sc. | .                           | . | .             | . | . | . | .     |
| ZNF83 ENST0000.  | 20q. | .   | .                           | . | .             | . | . | . | .     |
| . ENST0000.      | 20q. | .   | Score.                      | . | .             | . | . | . | .     |
| . ENST0000.      | 20q. | .   | .                           | . | .             | . | . | . | .     |
| . ENST0000.      | 20q. | .   | Score rs1874434.            | . | .             | . | . | . | .     |
| . .              | 21p. | .   | Score=0.9f.                 | . | .             | . | . | . | .     |
| . ENST0000.      | 21p. | .   | Score=0.9f.                 | . | .             | . | . | . | .     |
| . .              | 21p. | .   | Score=0.9f Score.           | . | .             | . | . | . | .     |
| . .              | 21p. | .   | Score=0.9f.                 | . | rs3707796 ID. | . | . | . | .     |
| . ENST0000.      | 21p. | .   | Score=0.9f.                 | . | rs7469658 ID. | . | . | . | .     |
| . .              | 21p. | .   | Score=0.9f Score rs4638882. | . | .             | . | . | . | .     |
| . ENST0000.      | 21q. | .   | .                           | . | .             | . | . | . | .     |
| . ENST0000.      | 21q. | .   | .                           | . | .             | . | . | . | .     |
| . ENST0000.      | 21q. | .   | .                           | . | .             | . | . | . | .     |
| CBS:NI ENST0000. | 21q. | Sc. | .                           | . | .             | . | . | . | .     |
| . ENST0000.      | 21q. | .   | .                           | . | rs7276130 ID. | . | . | . | .     |
| . ENST0000.      | 21q. | .   | .                           | . | .             | . | . | . | .     |
| . ENST0000.      | 22q. | .   | Score=0.9f.                 | . | .             | . | . | . | .     |
| . ENST0000.      | 22q. | .   | Score=0.9f.                 | . | .             | . | . | . | .     |
| . ENST0000.      | 22q. | .   | Score=0.9f Score.           | . | .             | . | . | . | .     |
| . ENST0000.      | 22q. | .   | Score=0.9f.                 | . | rs3769174.    | . | . | . | .     |
| PRODH ENST0000.  | 22q. | .   | Score=0.9f.                 | . | rs2870983 ID. | . | . | . | 0.032 |
| . ENST0000.      | 22q. | .   | .                           | . | .             | . | . | . | .     |
| . .              | 22q. | .   | Score=0.9f Score rs1389774. | . | .             | . | . | . | 0.067 |
| . ENST0000.      | 22q. | .   | Score=0.9f.                 | . | rs3731564 ID. | . | . | . | .     |
| . ENST0000.      | 22q. | .   | Score=0.9f.                 | . | rs1856371 ID. | . | . | . | 0.016 |
| . ENST0000.      | 22q. | .   | .                           | . | .             | . | . | . | .     |
| . ENST0000.      | 22q. | .   | .                           | . | rs5669283.    | . | . | . | .     |
| . ENST0000.      | 22q. | .   | .                           | . | .             | . | . | . | .     |
| . ENST0000.      | 22q. | .   | .                           | . | rs7606577.    | . | . | . | .     |
| . ENST0000.      | 22q. | .   | Score=0.9f.                 | . | .             | . | . | . | .     |
| SYNGF ENST0000.  | 22q. | .   | .                           | . | .             | . | . | . | .     |
| XPNPE ENST0000.  | 22q. | .   | .                           | . | rs1409901.    | . | . | . | .     |
| EP300: ENST0000. | 22q. | .   | .                           | . | .             | . | . | . | .     |
| SREBF ENST0000.  | 22q. | .   | .                           | . | rs3731131.    | . | . | . | .     |
| . ENST0000.      | 22q. | .   | Score.                      | . | .             | . | . | . | .     |
| . ENST0000.      | 22q. | .   | Score.                      | . | .             | . | . | . | .     |
| . ENST0000.      | 22q. | .   | Score.                      | . | .             | . | . | . | .     |
| PLXNB ENST0000.  | 22q. | .   | .                           | . | rs7711497 ID. | . | . | . | .     |
| . ENST0000.      | Xp2. | .   | Score=0.9f.                 | . | .             | . | . | . | .     |
| . .              | Xp2. | .   | Score=0.9f Score rs8673094. | . | .             | . | . | . | .     |
| . ENST0000.      | Xp2. | .   | Score=0.9f.                 | . | rs7643909.    | . | . | . | .     |
| . ENST0000.      | Xp2. | .   | Score=0.9f.                 | . | rs6640384.    | . | . | . | .     |

|        |          |     |              |                 |    |  |       |
|--------|----------|-----|--------------|-----------------|----|--|-------|
| TLR7:1 | ENST0000 | Xp2 |              |                 |    |  |       |
| TLR8:1 | ENST0000 | Xp2 |              |                 |    |  |       |
| .      | ENST0000 | Xp2 | Sc           |                 |    |  |       |
| MAOA:  | ENST0000 | Xp1 |              |                 |    |  |       |
| .      | ENST0000 | Xp1 | Score=0.9    |                 |    |  |       |
| PCSK1  | ENST0000 | Xp1 | Score        |                 |    |  |       |
| .      | ENST0000 | Xp1 | Score=0.9    |                 |    |  |       |
| .      | ENST0000 | Xp1 |              |                 |    |  |       |
| .      | ENST0000 | Xp1 |              |                 |    |  |       |
| GNL3L  | ENST0000 | Xp1 |              |                 |    |  |       |
| .      | ENST0000 | Xp1 | Score=0.9    |                 |    |  |       |
| .      | ENST0000 | Xq1 | Score        |                 |    |  |       |
| MED12  | ENST0000 | Xq1 |              |                 |    |  |       |
| NLGN3  | ENST0000 | Xq1 | Sc           |                 |    |  |       |
| .      | ENST0000 | Xq1 | Score=0.9    |                 |    |  |       |
| .      | ENST0000 | Xq2 |              |                 |    |  |       |
| SASH3  | ENST0000 | Xq2 |              |                 |    |  |       |
| UTP14: | ENST0000 | Xq2 | Score        | ID              |    |  |       |
| BCORL  | ENST0000 | Xq2 |              |                 |    |  |       |
| .      | ENST0000 | Xq2 |              |                 |    |  |       |
| ARHGE  | ENST0000 | Xq2 | Sc           |                 |    |  |       |
| UNKN   | ENST0000 | Xq2 | Score=0.9    | Score           |    |  |       |
| TREX2  | ENST0000 | Xq2 | Sc           | rs7824625       |    |  |       |
| .      | ENST0000 | Xq2 | Score        |                 |    |  |       |
| .      | ENST0000 | 1p3 | Score=0.9    |                 |    |  |       |
| .      | ENST0000 | 1p3 | Score=0.9    | Score rs7810569 | ID |  |       |
| .      | ENST0000 | 1p3 | Score=0.9    | rs1149269       |    |  |       |
| FAM21  | ENST0000 | 1p3 |              |                 |    |  |       |
| .      | ENST0000 | 1p3 |              |                 |    |  |       |
| .      | ENST0000 | 1p3 |              |                 |    |  |       |
| .      | ENST0000 | 1p3 | Score=0.9    | rs2008876       | ID |  |       |
| .      | ENST0000 | 1p3 | Score=0.9    | rs5565927       |    |  | 0.002 |
| .      | ENST0000 | 1p3 | Score=0.9    | rs6177234       |    |  |       |
| .      | ENST0000 | 1p3 | Score=0.9    | rs1008195       | ID |  |       |
| .      | ENST0000 | 1p3 | Score=0.9    | rs5388409       | ID |  | 0.025 |
| CROCC  | ENST0000 | 1p3 | Sc Score=0.9 | rs6669627       | ID |  |       |
| .      | ENST0000 | 1p3 |              |                 |    |  |       |
| .      | ENST0000 | 1p3 |              | rs7661411       | ID |  |       |
| HIVEP: | ENST0000 | 1p3 |              | rs7802118       | ID |  |       |
| .      |          | 1p3 | Score=0.9    | Score rs8664767 | ID |  |       |
| .      |          | 1p3 | Score        |                 |    |  |       |
| .      | ENST0000 | 1q2 | Score=0.9    | rs7581372       |    |  |       |
| .      | ENST0000 | 1q2 | Score=0.9    | rs7697846       |    |  |       |
| .      |          | 1q2 | Score=0.9    | rs2016919       |    |  |       |
| .      | ENST0000 | 1q2 | Score=0.9    | ID              |    |  |       |
| .      | ENST0000 | 1q2 | Score=0.9    | rs3703375       |    |  |       |
| .      | ENST0000 | 1q2 | Score=0.9    | rs1996515       | ID |  |       |
| .      |          | 1q2 | Score=0.9    |                 |    |  |       |
| .      |          | 1q2 | Score=0.9    |                 |    |  |       |
| .      | ENST0000 | 1q2 | Score=0.9    | ID              |    |  |       |
| .      | ENST0000 | 1q2 | Score=0.9    | Score           |    |  |       |
| .      | ENST0000 | 1q2 | Score=0.9    | ID              |    |  |       |
| .      | ENST0000 | 1q2 | Score=0.9    | rs8799960       | ID |  |       |
| .      | ENST0000 | 1q2 | Score=0.9    | Score rs2003739 |    |  |       |

|       |           |      |           |                     |   |   |   |       |
|-------|-----------|------|-----------|---------------------|---|---|---|-------|
| .     | ENST0000. | 1q2. | Score=0.9 | Score rs3705433     | . | . | . | .     |
| .     | ENST0000. | 1q2. | .         | .                   | . | . | . | .     |
| .     | ENST0000. | 1q4. | Score=0.9 | rs1839036           | . | . | . | 0.404 |
| .     | ENST0000. | 1q4. | Score=0.9 | Score.              | . | . | . | .     |
| .     | ENST0000. | 1q4. | Score=0.9 | Score.              | . | . | . | .     |
| .     | ENST0000. | 1q4. | .         | .                   | . | . | . | .     |
| .     | .         | 1q4. | Score=0.9 | rs1828179           | . | . | . | .     |
| .     | .         | 2p1. | Score=0.9 | rs4096246 ID:       | . | . | . | 0.026 |
| .     | ENST0000. | 2p1. | Score=0.9 | .                   | . | . | . | .     |
| .     | .         | 2p1. | Score=0.9 | .                   | . | . | . | .     |
| .     | ENST0000. | 2p1. | Score=0.9 | .                   | . | . | . | .     |
| ANAPC | ENST0000. | 2q1. | Score=0.9 | rs2011280 ID:       | . | . | . | .     |
| .     | .         | 2q1. | Score=0.9 | rs8685337 ID:       | . | . | . | .     |
| .     | ENST0000. | 2q1. | Score=0.9 | rs2747968 ID:       | . | . | . | .     |
| .     | ENST0000. | 2q1. | .         | Score rs1029282     | . | . | . | .     |
| .     | ENST0000. | 2q2. | Score=0.9 | Score rs2001821     | . | . | . | .     |
| .     | ENST0000. | 2q2. | Score=0.9 | rs7800646 ID:       | . | . | . | .     |
| .     | ENST0000. | 2q3. | .         | .                   | . | . | . | .     |
| .     | ENST0000. | 2q3. | .         | .                   | . | . | . | .     |
| .     | ENST0000. | 2q3. | .         | rs1875561 ID:       | . | . | . | 0.006 |
| .     | ENST0000. | 2q3. | .         | Score rs8671576 ID: | . | . | . | .     |
| .     | ENST0000. | 3p2. | .         | .                   | . | . | . | .     |
| AGTR1 | ENST0000. | 3q2. | Sc        | .                   | . | . | . | .     |
| .     | ENST0000. | 3q2. | .         | .                   | . | . | . | .     |
| .     | ENST0000. | 3q2. | .         | .                   | . | . | . | .     |
| .     | .         | 3q2. | Score=0.9 | Score rs3760511 ID: | . | . | . | .     |
| .     | ENST0000. | 3q2. | .         | rs8677455           | . | . | . | .     |
| .     | ENST0000. | 3q2. | Score=0.9 | rs1128840 ID:       | . | . | . | .     |
| .     | ENST0000. | 4p1. | .         | .                   | . | . | . | .     |
| .     | ENST0000. | 4p1. | .         | rs1443656 ID:       | . | . | . | .     |
| .     | ENST0000. | 5p1. | .         | .                   | . | . | . | .     |
| .     | ENST0000. | 5p1. | Score=0.9 | Score.              | . | . | . | .     |
| .     | ENST0000. | 5q1. | Score=0.9 | Score rs3759258     | . | . | . | 0.772 |
| .     | ENST0000. | 5q1. | Score=0.9 | Score rs8790446 ID: | . | . | . | .     |
| .     | ENST0000. | 5q2. | Score=0.9 | ID:                 | . | . | . | .     |
| .     | ENST0000. | 5q3. | .         | .                   | . | . | . | .     |
| .     | ENST0000. | 5q3. | .         | .                   | . | . | . | .     |
| COL23 | ENST0000. | 5q3. | .         | .                   | . | . | . | .     |
| .     | ENST0000. | 5q3. | .         | .                   | . | . | . | .     |
| .     | .         | 6p2. | .         | rs3719775           | . | . | . | .     |
| .     | .         | 6p2. | .         | rs9202904           | . | . | . | .     |
| .     | .         | 6p1. | .         | Score rs4292554 ID: | . | . | . | .     |
| .     | .         | 6p1. | .         | Score rs4437505 ID: | . | . | . | .     |
| .     | ENST0000. | 6q2. | .         | rs7508774           | . | . | . | .     |
| .     | ENST0000. | 6q2. | .         | .                   | . | . | . | .     |
| .     | ENST0000. | 6q2. | Score=0.9 | rs1436754           | . | . | . | .     |
| .     | ENST0000. | 6q2. | .         | Score.              | . | . | . | .     |
| .     | ENST0000. | 7p2. | .         | .                   | . | . | . | .     |
| .     | ENST0000. | 7p2. | Score=0.9 | Score rs2016650     | . | . | . | .     |
| .     | ENST0000. | 7p1. | .         | Score.              | . | . | . | .     |
| .     | ENST0000. | 7p1. | Score=0.9 | .                   | . | . | . | .     |
| .     | ENST0000. | 7p1. | Score=0.9 | ID:                 | . | . | . | .     |
| .     | ENST0000. | 7p1. | Score=0.9 | .                   | . | . | . | .     |
| .     | ENST0000. | 7p1. | Score=0.9 | .                   | . | . | . | .     |

|        |           |            |           |                 |           |  |  |  |       |
|--------|-----------|------------|-----------|-----------------|-----------|--|--|--|-------|
|        | ENST0000. | 7p1.       | Score=0.9 |                 |           |  |  |  |       |
|        | ENST0000. | 7p1.       | Score=0.9 |                 |           |  |  |  |       |
|        | ENST0000. | 7p1.       | Score=0.9 | Score.          |           |  |  |  |       |
|        |           | 7q1.       |           | Score rs4596537 |           |  |  |  |       |
|        |           | 7q1.       |           | Score rs2167825 | ID:       |  |  |  |       |
|        | ENST0000. | 7q1.       | Score=0.9 | rs586765        | ID:       |  |  |  |       |
|        |           | 7q1.       | Score=0.9 | rs8688020       | ID:       |  |  |  |       |
|        | ENST0000. | 7q1.       | Score=0.9 | rs2462259       | ID:       |  |  |  |       |
|        | ENST0000. | 7q2.       | Score=0.9 | rs6248349       |           |  |  |  |       |
|        | ENST0000. | 7q3.       | Score=0.9 | rs3741264       |           |  |  |  |       |
|        | ENST0000. | 7q3.       | Score=0.9 |                 |           |  |  |  |       |
|        |           | 8p2.       | Score=0.9 | rs2077351       | ID:       |  |  |  |       |
|        | ENST0000. | 8p1.       |           |                 |           |  |  |  |       |
|        |           | 8p1.       |           | Score rs7503847 |           |  |  |  |       |
|        |           | 8p1.       |           | Score rs7967153 | ID:       |  |  |  |       |
|        |           | 8p1.       |           | Score.          | ID:       |  |  |  |       |
|        |           | 8q1.       |           | Score rs4363208 | ID:       |  |  |  |       |
|        |           | 8q1.       |           | Score rs3740584 |           |  |  |  |       |
|        | ENST0000. | 8q2.       |           | Score.          |           |  |  |  |       |
| ARC:NI | ENST0000. | 8q2.       | Sc        |                 |           |  |  |  |       |
|        | ENST0000. | 8q2.       |           | Score rs7821104 | ID:       |  |  |  |       |
|        |           | 9p1.       | Score=0.9 | Score rs7495042 | ID:       |  |  |  |       |
|        |           | 9q1.       | Score=0.8 | Score rs4928839 |           |  |  |  |       |
|        | ENST0000. | 9q1.       | Sc        | Score=0.9       | rs4568707 |  |  |  |       |
|        | ENST0000. | 9q2.       | Score=0.9 | rs1435617       | ID:       |  |  |  |       |
|        | ENST0000. | 9q2.       | Score=0.9 | rs3773733       |           |  |  |  |       |
|        | ENST0000. | 9q2.       |           | Score.          |           |  |  |  |       |
|        | ENST0000. | 9q3.       |           |                 |           |  |  |  |       |
|        | ENST0000. | 9q3.       |           | Score.          |           |  |  |  |       |
|        |           | 10p.       |           | Score rs1397322 | ID:       |  |  |  |       |
|        | ENST0000  | hsa-mir-60 |           | Score.          |           |  |  |  |       |
|        | ENST0000. | 10p.       |           | Score rs9631413 |           |  |  |  |       |
|        | ENST0000. | 10p.       |           |                 |           |  |  |  |       |
|        | ENST0000. | 10q.       | Score=0.9 | Score rs694157  |           |  |  |  |       |
|        | ENST0000. | 10q.       | Score=0.8 | rs5275172       |           |  |  |  |       |
|        | ENST0000. | 10q.       |           | rs1888127       |           |  |  |  |       |
|        |           | 10q.       | Score=0.9 | rs2573327       | ID:       |  |  |  |       |
|        | ENST0000. | 10q.       | Score=0.9 | rs3128226       |           |  |  |  | 0.524 |
|        | ENST0000. | 11p.       | Score=0.9 |                 | ID:       |  |  |  |       |
|        | ENST0000. | 11p.       | Score=0.9 |                 | ID:       |  |  |  |       |
|        |           | 11q.       |           | Score rs9035709 | ID:       |  |  |  |       |
|        |           | 11q.       | Score=0.9 | rs1874489       | ID:       |  |  |  |       |
| PRKR11 | ENST0000. | 11q.       | Score=0.9 | rs9666739       |           |  |  |  |       |
|        | ENST0000. | 11q.       |           | Score rs5688517 |           |  |  |  |       |
| OR8G5  | ENST0000. | 11q.       |           |                 |           |  |  |  |       |
|        | ENST0000. | 11q.       |           |                 |           |  |  |  |       |
|        | ENST0000. | 12q.       | Score=0.8 | rs7606061       |           |  |  |  |       |
| ERBB3  | ENST0000. | 12q.       |           |                 | ID:       |  |  |  |       |
|        | ENST0000. | 12q.       |           | rs7597010       | ID:       |  |  |  |       |
|        | ENST0000. | 13q.       | Score=0.9 | rs2004528       |           |  |  |  |       |
| MYO16  | ENST0000. | 13q.       | Sc        | rs1510074       | ID:       |  |  |  |       |
|        | ENST0000. | 14q.       | Score=0.9 | rs7446578       | ID:       |  |  |  |       |
|        | ENST0000. | 14q.       | Score=0.9 |                 |           |  |  |  |       |
|        | ENST0000. | 14q.       | Score=0.9 | rs2006543       |           |  |  |  |       |



|                 |      |             |                       |         |         |
|-----------------|------|-------------|-----------------------|---------|---------|
| . ENST0000.     | 14q. | . Score=0.9 | . rs2020426.          | . . .   | . . .   |
| . ENST0000.     | 14q. | . Score=0.9 | . rs7704695 ID:       | . . .   | . . .   |
| UNKNC ENST0000. | 14q. | . . . .     | . . . .               | . . . . | . . . . |
| . ENST0000.     | 14q. | . . . .     | . . . .               | . . . . | . . . . |
| . ENST0000.     | 14q. | . Score=0.9 | . ID:                 | . . . . | . . . . |
| . . . .         | 15q. | . Score=0.9 | . Score rs6200967 ID: | . . . . | . 0.345 |
| . ENST0000.     | 15q. | . Score=0.9 | . . . .               | . . . . | . . . . |
| . ENST0000.     | 15q. | . . . .     | . . . .               | . . . . | . . . . |
| . ENST0000.     | 15q. | . Score=0.9 | . rs7751825           | . . . . | . . . . |
| . ENST0000.     | 15q. | . Score=0.9 | . Score rs2449652 ID: | . . . . | . 0.026 |
| . ENST0000.     | 15q. | . Score=0.9 | . Score rs2449653 ID: | . . . . | . 0.167 |
| . ENST0000.     | 15q. | . Score=0.9 | . . . .               | . . . . | . . . . |
| . ENST0000.     | 15q. | . Score=0.9 | . . . .               | . . . . | . . . . |
| . ENST0000.     | 15q. | . Score=0.9 | . rs6202600.          | . . . . | . 0.422 |
| . ENST0000.     | 15q. | . . . .     | . . . .               | . . . . | . . . . |
| . ENST0000.     | 15q. | . . . .     | . . . .               | . . . . | . . . . |
| GOLG/ ENST0000. | 15q. | . Score=0.9 | . . . .               | . . . . | . . . . |
| . . . .         | 15q. | . Score=0.9 | . rs3743150.          | . . . . | . 0.446 |
| . ENST0000.     | 15q. | . Score=0.9 | . rs9700260.          | . . . . | . . . . |
| . ENST0000.     | 15q. | . Score=0.9 | . rs364085.           | . . . . | . . . . |
| . ENST0000.     | 16p. | . Score=0.9 | . rs2009400.          | . . . . | . . . . |
| . ENST0000.     | 16p. | . Score=0.9 | . rs2016432.          | . . . . | . . . . |
| . ENST0000.     | 16p. | . Score=0.9 | . ID:                 | . . . . | . . . . |
| . . . .         | 16p. | . Score=0.9 | . rs5667377.          | . . . . | . 0.001 |
| . ENST0000.     | 16p. | . Score=0.9 | . rs5618411 ID:       | . . . . | . . . . |
| . . . .         | 16p. | . Score=0.9 | . Score rs8792106.    | . . . . | . . . . |
| . . . .         | 16q. | . . . .     | . Score rs4319791 ID: | . . . . | . . . . |
| . . . .         | 16q. | . . . .     | . Score rs4349321.    | . . . . | . . . . |
| . . . .         | 16q. | . . . .     | . Score rs4246344.    | . . . . | . . . . |
| . . . .         | 16q. | . . . .     | . . . .               | . . . . | . . . . |
| . . . .         | 16q. | . . . .     | . Score rs8799648.    | . . . . | . . . . |
| . . . .         | 16q. | . . . .     | . Score rs9972801.    | . . . . | . . . . |
| . . . .         | 16q. | . . . .     | . Score rs4324300 ID: | . . . . | . . . . |
| . . . .         | 16q. | . . . .     | . Score rs9328621 ID: | . . . . | . . . . |
| . . . .         | 16q. | . . . .     | . Score rs4380209 ID: | . . . . | . . . . |
| . . . .         | 16q. | . . . .     | . Score rs4291933.    | . . . . | . . . . |
| . . . .         | 16q. | . . . .     | . rs4011858 ID:       | . . . . | . . . . |
| . . . .         | 16q. | . . . .     | . Score.              | . . . . | . . . . |
| . . . .         | 16q. | . . . .     | . Score rs7205231.    | . . . . | . . . . |
| . . . .         | 16q. | . . . .     | . Score rs4093117.    | . . . . | . . . . |
| . . . .         | 16q. | . . . .     | . Score rs4249029.    | . . . . | . . . . |
| . . . .         | 16q. | . . . .     | . Score.              | . . . . | . . . . |
| . ENST0000.     | 16q. | . Score=0.9 | . rs6205366.          | . . . . | . . . . |
| . ENST0000.     | 17p. | . Score=0.9 | . rs2543804 ID:       | . . . . | . . . . |
| . ENST0000.     | 17p. | . Score=0.9 | . rs7126379 ID:       | . . . . | . . . . |
| . ENST0000.     | 17p. | . Score=0.9 | . rs7126379 ID:       | . . . . | . . . . |
| . ENST0000.     | 17p. | . Score=0.9 | . rs7841783.          | . . . . | . . . . |
| . . . .         | 17p. | . . . .     | . Score.              | . . . . | . . . . |
| . . . .         | 17p. | . . . .     | . Score rs1437650.    | . . . . | . . . . |
| . . . .         | 17p. | . . . .     | . Score.              | . . . . | . . . . |
| . ENST0000.     | 17q. | . Score=0.9 | . rs6207957.          | . . . . | . . . . |
| KRTAP ENST0000. | 17q. | . Score=0.9 | . rs7482024 ID:       | . . . . | . . . . |
| . ENST0000.     | 17q. | . . . .     | . rs1459625 ID:       | . . . . | . . . . |
| . ENST0000.     | 17q. | . Score=0.9 | . . . .               | . . . . | . . . . |

|         |           |      |           |               |           |   |       |
|---------|-----------|------|-----------|---------------|-----------|---|-------|
| .       | ENST0000. | 18p. | Score=0.9 | rs2012257 ID. | .         | . | .     |
| .       | ENST0000. | 18p. | Score=0.9 | rs3734996     | .         | . | .     |
| .       | ENST0000. | 18q. | .         | rs7520640     | .         | . | .     |
| .       | ENST0000. | 19p. | .         | .             | .         | . | .     |
| .       | ENST0000. | 19q. | .         | .             | .         | . | .     |
| .       | .         | 19q. | Score=0.9 | rs7641371     | .         | . | .     |
| .       | .         | 19q. | Score=0.9 | Score.        | .         | . | .     |
| .       | ENST0000. | 19q. | Score=0.9 | .             | .         | . | .     |
| .       | ENST0000. | 19q. | .         | .             | .         | . | .     |
| .       | ENST0000. | 19q. | .         | rs3499068 ID. | .         | . | .     |
| .       | ENST0000. | 19q. | .         | rs5615613 ID. | .         | . | .     |
| .       | ENST0000. | 19q. | Score=0.9 | rs1334652 ID. | .         | . | .     |
| .       | ENST0000. | 19q. | .         | rs3751555 ID. | .         | . | .     |
| NCOA6   | ENST0000. | 20q. | Score.    | ID.           | .         | . | .     |
| .       | ENST0000. | 21p. | Score=0.9 | rs7984422 ID. | .         | . | .     |
| .       | .         | 21p. | Score=0.9 | rs2017188 ID. | .         | . | .     |
| .       | ENST0000. | 22q. | Score=0.9 | rs3753995 ID. | .         | . | .     |
| .       | ENST0000. | 22q. | Score=0.9 | .             | .         | . | .     |
| .       | ENST0000. | 22q. | Score=0.9 | rs2021509 ID. | .         | . | .     |
| .       | ENST0000. | 22q. | Score=0.9 | .             | .         | . | .     |
| .       | ENST0000. | 22q. | Score=0.9 | rs6221896 ID. | .         | . | .     |
| .       | ENST0000. | 22q. | Score=0.9 | rs2016329 ID. | .         | . | 0.114 |
| .       | ENST0000. | 22q. | Score=0.9 | rs6223125 ID. | .         | . | .     |
| .       | ENST0000. | 22q. | Score=0.9 | rs367416 ID.  | .         | . | .     |
| .       | ENST0000. | 22q. | Score=0.9 | rs3609392     | .         | . | 0.302 |
| .       | ENST0000. | 22q. | Score=0.9 | .             | .         | . | .     |
| .       | ENST0000. | 22q. | .         | .             | .         | . | .     |
| .       | ENST0000. | Xp1. | .         | .             | .         | . | .     |
| .       | .         | Xq1. | Score.    | .             | .         | . | .     |
| .       | .         | Xq1. | Score.    | ID.           | .         | . | .     |
| .       | .         | Xq1. | Score     | rs7520049     | .         | . | .     |
| .       | .         | Xq1. | Score     | rs7756689     | .         | . | .     |
| .       | .         | Xq1. | Score.    | .             | .         | . | .     |
| SNX12   | ENST0000. | Xq1. | Sc.       | rs1048883 ID. | .         | . | .     |
| .       | ENST0000. | Xq1. | .         | .             | .         | . | .     |
| NHSL2   | ENST0000. | Xq1. | .         | .             | .         | . | .     |
| .       | ENST0000. | Xq2. | Score=0.9 | rs1423249 ID. | .         | . | .     |
| .       | .         | Xq2. | .         | .             | .         | . | .     |
| .       | ENST0000. | 1p3. | Score=0.9 | rs3744991 ID. | .         | . | 0.092 |
| .       | ENST0000. | 1p3. | .         | .             | .         | . | .     |
| KLHL17  | ENST0000. | 1p3. | Sc.       | rs1159856     | .         | . | .     |
| UNKNC   | ENST0000. | 1p3. | .         | .             | .         | . | .     |
| ISG15:1 | ENST0000. | 1p3. | .         | .             | .         | . | .     |
| .       | ENST0000. | 1p3. | .         | rs5413521     | .         | . | .     |
| .       | ENST0000. | 1p3. | .         | rs7680451 ID. | .         | . | .     |
| .       | ENST0000. | 1p3. | .         | .             | .         | . | .     |
| MXRA8   | ENST0000. | 1p3. | Sc.       | .             | .         | . | .     |
| .       | ENST0000. | 1p3. | .         | rs7800811     | .         | . | .     |
| .       | ENST0000. | 1p3. | .         | .             | .         | . | .     |
| .       | ENST0000. | 1p3. | Score=0.9 | rs2014492     | .         | . | 0.001 |
| UNKNC   | ENST0000. | 1p3. | Sc        | Score=0.9     | rs7463384 | . | .     |
| .       | ENST0000. | 1p3. | Score=0.9 | Score.        | .         | . | .     |
| .       | ENST0000. | 1p3. | Score=0.9 | Score.        | .         | . | .     |
| GABRI   | ENST0000. | 1p3. | .         | .             | .         | . | .     |

|                  |      |     |             |               |        |   |   |   |       |
|------------------|------|-----|-------------|---------------|--------|---|---|---|-------|
| . ENST0000.      | 1p3. | .   | .           | .             | .      | . | . | . | .     |
| . ENST0000.      | 1p3. | .   | .           | .             | .      | . | . | . | .     |
| MEGF6 ENST0000.  | 1p3. | .   | .           | .             | .      | . | . | . | .     |
| . ENST0000.      | 1p3. | .   | .           | Score.        | .      | . | . | . | .     |
| UNKNC ENST0000.  | 1p3. | Sc. | .           | .             | .      | . | . | . | .     |
| . ENST0000.      | 1p3. | .   | .           | .             | .      | . | . | . | .     |
| . ENST0000.      | 1p3. | .   | .           | rs9430027.    | .      | . | . | . | .     |
| CHD5:1 ENST0000. | 1p3. | Sc. | .           | .             | ID.    | . | . | . | .     |
| CHD5:1 ENST0000. | 1p3. | Sc. | .           | .             | .      | . | . | . | .     |
| . ENST0000.      | 1p3. | .   | .           | rs9864160.    | .      | . | . | . | .     |
| . ENST0000.      | 1p3. | .   | .           | rs7562596.    | .      | . | . | . | .     |
| CAMT1 ENST0000.  | 1p3. | .   | .           | rs1431018.    | .      | . | . | . | .     |
| . ENST0000.      | 1p3. | .   | .           | Score.        | .      | . | . | . | .     |
| CAMT1 ENST0000.  | 1p3. | .   | .           | rs7748471.    | .      | . | . | . | .     |
| . ENST0000.      | 1p3. | .   | .           | rs9446685.    | .      | . | . | . | .     |
| GPR15 ENST0000.  | 1p3. | Sc. | .           | rs1476580.    | .      | . | . | . | .     |
| . ENST0000.      | 1p3. | .   | .           | Score.        | .      | . | . | . | .     |
| . ENST0000.      | 1p3. | .   | .           | .             | .      | . | . | . | .     |
| . ENST0000.      | 1p3. | .   | .           | .             | .      | . | . | . | .     |
| . ENST0000.      | 1p3. | .   | .           | rs7934532.    | Uncer. | . | . | . | .     |
| . ENST0000.      | 1p3. | .   | .           | Score.        | .      | . | . | . | .     |
| VPS131 ENST0000. | 1p3. | .   | .           | .             | .      | . | . | . | .     |
| . ENST0000.      | 1p3. | .   | Score=0.9f. | rs2021163 ID. | .      | . | . | . | .     |
| . ENST0000.      | 1p3. | .   | Score=0.9f. | rs5876978 ID. | .      | . | . | . | 0.307 |
| CASP9 ENST0000.  | 1p3. | .   | .           | rs4646008.    | .      | . | . | . | .     |
| . ENST0000.      | 1p3. | .   | .           | rs3745685.    | .      | . | . | . | .     |
| ARHG1 ENST0000.  | 1p3. | .   | .           | .             | .      | . | . | . | .     |
| UNKNC ENST0000.  | 1p3. | .   | Score=0.9f. | rs3734377 ID. | .      | . | . | . | .     |
| . ENST0000.      | 1p3. | .   | Score=0.9f. | rs6177234.    | .      | . | . | . | .     |
| . ENST0000.      | 1p3. | .   | Score=0.9f. | rs4112521.    | .      | . | . | . | .     |
| . ENST0000.      | 1p3. | .   | Score=0.9f. | rs1213433 ID. | .      | . | . | . | .     |
| . .              | 1p3. | .   | Score=0.9f. | rs3930814 ID. | .      | . | . | . | .     |
| . ENST0000.      | 1p3. | .   | .           | rs5780915.    | .      | . | . | . | 0.019 |
| IGSF21 ENST0000. | 1p3. | .   | .           | rs3774826.    | .      | . | . | . | .     |
| TAS1R ENST0000.  | 1p3. | .   | .           | rs3766882.    | .      | . | . | . | .     |
| UBR4:1 ENST0000. | 1p3. | Sc. | .           | rs3471023.    | .      | . | . | . | .     |
| UBR4:1 ENST0000. | 1p3. | Sc. | .           | .             | .      | . | . | . | .     |
| . ENST0000.      | 1p3. | .   | .           | .             | .      | . | . | . | .     |
| . ENST0000.      | 1p3. | .   | .           | rs3712996.    | .      | . | . | . | .     |
| . ENST0000.      | 1p3. | .   | .           | Score.        | .      | . | . | . | .     |
| . ENST0000.      | 1p3. | .   | .           | rs1001195.    | .      | . | . | . | .     |
| . ENST0000.      | 1p3. | .   | .           | .             | .      | . | . | . | .     |
| UNKNC ENST0000.  | 1p3. | .   | .           | .             | .      | . | . | . | .     |
| . .              | 1p3. | .   | Score=0.9f. | rs7584776 ID. | .      | . | . | . | .     |
| CELA3 ENST0000.  | 1p3. | .   | Score=0.9f. | .             | .      | . | . | . | .     |
| . ENST0000.      | 1p3. | .   | .           | .             | .      | . | . | . | .     |
| . ENST0000.      | 1p3. | .   | .           | .             | .      | . | . | . | .     |
| . ENST0000.      | 1p3. | .   | .           | rs1391690.    | .      | . | . | . | .     |
| RUNX3 ENST0000.  | 1p3. | .   | .           | rs7518873 ID. | .      | . | . | . | .     |
| . ENST0000.      | 1p3. | .   | Score=0.9f. | .             | .      | . | . | . | .     |
| . ENST0000.      | 1p3. | .   | .           | .             | .      | . | . | . | .     |
| . ENST0000.      | 1p3. | .   | .           | .             | .      | . | . | . | .     |
| FAM11 ENST0000.  | 1p3. | Sc. | .           | .             | .      | . | . | . | .     |

|         |           |      |           |   |                      |   |   |   |       |
|---------|-----------|------|-----------|---|----------------------|---|---|---|-------|
| CNKSF   | ENST0000. | 1p3. | .         | . | rs7737670.           | . | . | . | .     |
| UBXN1   | ENST0000. | 1p3. | Sc.       | . | rs7767332.           | . | . | . | .     |
| RPS6K   | ENST0000. | 1p3. | .         | . | .                    | . | . | . | .     |
| ARID1A  | ENST0000. | 1p3. | .         | . | rs8792552 ID: Patho. | . | . | . | .     |
| ZDHC1   | ENST0000. | 1p3. | Sc.       | . | .                    | . | . | . | .     |
| .       | ENST0000. | 1p3. | .         | . | rs1003250.           | . | . | . | .     |
| .       | ENST0000. | 1p3. | Sc.       | . | rs7625790.           | . | . | . | .     |
| .       | ENST0000. | 1p3. | .         | . | rs9468364.           | . | . | . | .     |
| .       | ENST0000. | 1p3. | Score=0.9 | . | .                    | . | . | . | .     |
| .       | ENST0000. | 1p3. | .         | . | ID:                  | . | . | . | .     |
| .       | ENST0000. | 1p3. | .         | . | .                    | . | . | . | .     |
| FABP3   | ENST0000. | 1p3. | .         | . | rs7596455 ID:        | . | . | . | .     |
| SPOC1   | ENST0000. | 1p3. | .         | . | rs9232513.           | . | . | . | .     |
| .       | ENST0000. | 1p3. | .         | . | .                    | . | . | . | .     |
| LCK:NM  | ENST0000. | 1p3. | .         | . | .                    | . | . | . | .     |
| .       | .         | 1p3. | .         | . | Score.               | . | . | . | .     |
| .       | ENST0000. | 1p3. | .         | . | Score.               | . | . | . | .     |
| .       | ENST0000. | 1p3. | .         | . | rs9651423.           | . | . | . | .     |
| RSPO1   | ENST0000. | 1p3. | .         | . | rs7723940.           | . | . | . | .     |
| .       | ENST0000. | 1p3. | .         | . | Score.               | . | . | . | .     |
| .       | ENST0000. | 1p3. | .         | . | rs1814745.           | . | . | . | 0.009 |
| .       | ENST0000. | 1p3. | .         | . | Score.               | . | . | . | .     |
| .       | ENST0000. | 1p3. | .         | . | .                    | . | . | . | .     |
| .       | ENST0000. | 1p3. | .         | . | .                    | . | . | . | .     |
| .       | ENST0000. | 1p3. | Score=0.9 | . | rs5523408.           | . | . | . | .     |
| .       | ENST0000. | 1p3. | .         | . | .                    | . | . | . | .     |
| PPT1:NM | ENST0000. | 1p3. | Sc.       | . | .                    | . | . | . | .     |
| RLF:NM  | ENST0000. | 1p3. | .         | . | .                    | . | . | . | .     |
| .       | ENST0000. | 1p3. | Sc.       | . | .                    | . | . | . | .     |
| .       | ENST0000. | 1p3. | .         | . | rs9093579.           | . | . | . | .     |
| .       | ENST0000. | 1p3. | .         | . | .                    | . | . | . | .     |
| .       | ENST0000. | 1p3. | .         | . | rs1179985.           | . | . | . | .     |
| YBX1:NM | ENST0000. | 1p3. | .         | . | rs7456140.           | . | . | . | .     |
| .       | ENST0000. | 1p3. | .         | . | .                    | . | . | . | .     |
| .       | ENST0000. | 1p3. | .         | . | Score.               | . | . | . | .     |
| .       | ENST0000. | 1p3. | .         | . | .                    | . | . | . | .     |
| CCDC1   | ENST0000. | 1p3. | .         | . | .                    | . | . | . | .     |
| .       | ENST0000. | 1p3. | .         | . | rs7290104.           | . | . | . | 0.009 |
| .       | ENST0000. | 1p3. | .         | . | .                    | . | . | . | .     |
| MKNK1   | ENST0000. | 1p3. | Sc.       | . | rs5508458.           | . | . | . | .     |
| .       | ENST0000. | 1p3. | Score=0.9 | . | .                    | . | . | . | .     |
| .       | ENST0000. | 1p3. | .         | . | .                    | . | . | . | .     |
| .       | ENST0000. | 1p3. | .         | . | Score rs7570389.     | . | . | . | .     |
| .       | ENST0000. | 1p3. | .         | . | rs9512571.           | . | . | . | .     |
| .       | ENST0000. | 1p3. | .         | . | Score rs7759188.     | . | . | . | .     |
| CYB5R   | ENST0000. | 1p3. | Sc.       | . | .                    | . | . | . | .     |
| PCSK9   | ENST0000. | 1p3. | .         | . | rs3769455.           | . | . | . | .     |
| PRKAA   | ENST0000. | 1p3. | .         | . | rs7815069 ID:        | . | . | . | .     |
| .       | ENST0000. | 1p3. | .         | . | .                    | . | . | . | .     |
| .       | ENST0000. | 1p3. | .         | . | .                    | . | . | . | .     |
| .       | ENST0000. | 1p3. | .         | . | .                    | . | . | . | .     |
| .       | ENST0000. | 1p3. | .         | . | .                    | . | . | . | .     |
| ELTD1:  | ENST0000. | 1p3. | .         | . | rs1785229.           | . | . | . | .     |

|        |           |      |            |   |                       |   |   |   |   |
|--------|-----------|------|------------|---|-----------------------|---|---|---|---|
| .      | ENST0000. | 1p3. | Score=0.90 | . | .                     | . | . | . | . |
| LPHN2  | ENST0000. | 1p3. | .          | . | rs1394863 ID:         | . | . | . | . |
| LPAR3  | ENST0000. | 1p2. | Sc.        | . | rs7636045.            | . | . | . | . |
| .      | ENST0000. | 1p2. | .          | . | .                     | . | . | . | . |
| .      | ENST0000. | 1p2. | .          | . | .                     | . | . | . | . |
| ABCA4  | ENST0000. | 1p2. | .          | . | .                     | . | . | . | . |
| ABCA4  | ENST0000. | 1p2. | .          | . | rs6174943 ID: not pr. | . | . | . | . |
| .      | ENST0000. | 1p2. | .          | . | .                     | . | . | . | . |
| .      | ENST0000. | 1p2. | .          | . | .                     | . | . | . | . |
| PRPF3  | ENST0000. | 1p1. | .          | . | .                     | . | . | . | . |
| .      | ENST0000. | 1p1. | .          | . | rs9363214.            | . | . | . | . |
| .      | ENST0000. | 1p1. | .          | . | Score rs7774328       | . | . | . | . |
| RBM15  | ENST0000. | 1p1. | .          | . | .                     | . | . | . | . |
| .      | ENST0000. | 1p1. | .          | . | Score.                | . | . | . | . |
| UNKNC  | ENST0000. | 1p1. | .          | . | ID:                   | . | . | . | . |
| .      | ENST0000. | 1p1. | .          | . | Score.                | . | . | . | . |
| MOV1C  | ENST0000. | 1p1. | Sc.        | . | rs7556469 ID:         | . | . | . | . |
| RHOC:  | ENST0000. | 1p1. | .          | . | .                     | . | . | . | . |
| MAGI3: | ENST0000. | 1p1. | .          | . | .                     | . | . | . | . |
| .      | ENST0000. | 1p1. | .          | . | .                     | . | . | . | . |
| AMPD1  | ENST0000. | 1p1. | .          | . | rs3724512.            | . | . | . | . |
| .      | ENST0000. | 1p1. | .          | . | ID:                   | . | . | . | . |
| .      | ENST0000. | 1p1. | .          | . | .                     | . | . | . | . |
| .      | ENST0000. | 1p1. | Score=0.9  | . | .                     | . | . | . | . |
| .      | ENST0000. | 1p1. | .          | . | rs1041798.            | . | . | . | . |
| .      | ENST0000. | 1p1. | .          | . | .                     | . | . | . | . |
| .      | ENST0000. | 1q2. | Score=0.9  | . | .                     | . | . | . | . |
| UNKNC  | ENST0000. | 1q2. | Score=0.9  | . | rs9441133 ID:         | . | . | . | . |
| .      | ENST0000. | 1q2. | Score=0.9  | . | rs4067693 ID:         | . | . | . | . |
| UNKNC  | ENST0000. | 1q2. | Score=0.9  | . | .                     | . | . | . | . |
| UNKNC  | ENST0000. | 1q2. | Sc.        | . | rs7819390 ID:         | . | . | . | . |
| .      | ENST0000. | 1q2. | Score=0.9  | . | rs7515424.            | . | . | . | . |
| .      | .         | 1q2. | Score=0.9  | . | .                     | . | . | . | . |
| POLR3  | ENST0000. | 1q2. | .          | . | .                     | . | . | . | . |
| .      | ENST0000. | 1q2. | Score=0.9  | . | .                     | . | . | . | . |
| .      | ENST0000. | 1q2. | Score=0.9  | . | .                     | . | . | . | . |
| .      | ENST0000. | 1q2. | Score=0.9  | . | .                     | . | . | . | . |
| .      | ENST0000. | 1q2. | .          | . | .                     | . | . | . | . |
| PI4KB: | ENST0000. | 1q2. | .          | . | .                     | . | . | . | . |
| POGZ:  | ENST0000. | 1q2. | Sc.        | . | .                     | . | . | . | . |
| FLG2:  | ENST0000. | 1q2. | .          | . | .                     | . | . | . | . |
| .      | ENST0000. | 1q2. | .          | . | rs9479104.            | . | . | . | . |
| .      | ENST0000. | 1q2. | .          | . | .                     | . | . | . | . |
| .      | ENST0000. | 1q2. | .          | . | .                     | . | . | . | . |
| DENNI  | ENST0000. | 1q2. | .          | . | rs7704251 ID:         | . | . | . | . |
| .      | ENST0000. | 1q2. | Sc.        | . | .                     | . | . | . | . |
| .      | ENST0000. | 1q2. | .          | . | .                     | . | . | . | . |
| ASH1L  | ENST0000. | 1q2. | .          | . | .                     | . | . | . | . |
| .      | ENST0000. | 1q2. | .          | . | .                     | . | . | . | . |
| .      | ENST0000. | 1q2. | .          | . | rs9321901             | . | . | . | . |
| .      | ENST0000. | 1q2. | .          | . | .                     | . | . | . | . |
| ETV3L: | ENST0000. | 1q2. | .          | . | rs3718046.            | . | . | . | . |
| .      | .         | 1q2. | .          | . | Score rs2000983 ID:   | . | . | . | . |
| CD1B:† | ENST0000. | 1q2. | .          | . | rs7734794             | . | . | . | . |

|                   |      |           |           |           |           |   |   |       |
|-------------------|------|-----------|-----------|-----------|-----------|---|---|-------|
| . ENST0000.       | 1q2. | .         | .         | rs7622475 | .         | . | . | .     |
| ADAM1 ENST0000.   | 1q2. | Sc.       | .         | .         | .         | . | . | .     |
| C1orf22 ENST0000. | 1q2. | .         | .         | rs2010794 | .         | . | . | .     |
| RGS4:1 ENST0000.  | 1q2. | .         | .         | .         | .         | . | . | .     |
| PBX1:1 ENST0000.  | 1q2. | Sc.       | .         | .         | .         | . | . | .     |
| POU2F ENST0000.   | 1q2. | Sc.       | .         | .         | ID.       | . | . | .     |
| . ENST0000.       | 1q2. | .         | .         | .         | .         | . | . | .     |
| . ENST0000.       | 1q2. | .         | .         | .         | .         | . | . | .     |
| . ENST0000.       | 1q2. | .         | .         | .         | .         | . | . | .     |
| . ENST0000.       | 1q2. | .         | .         | .         | .         | . | . | .     |
| . ENST0000.       | 1q2. | .         | .         | .         | .         | . | . | .     |
| ASTN1 ENST0000.   | 1q2. | Sc.       | .         | rs7763360 | ID.       | . | . | .     |
| ABL2:1 ENST0000.  | 1q2. | .         | .         | .         | .         | . | . | .     |
| . ENST0000.       | 1q2. | .         | .         | rs1014592 | .         | . | . | .     |
| . ENST0000.       | 1q2. | .         | .         | Score.    | ID.       | . | . | .     |
| CACNA ENST0000.   | 1q2. | Sc.       | .         | rs7733795 | .         | . | . | .     |
| ZNF641 ENST0000.  | 1q2. | .         | .         | rs7640679 | .         | . | . | .     |
| TEDDM ENST0000.   | 1q2. | .         | .         | .         | .         | . | . | .     |
| NPL:1 ENST0000.   | 1q2. | .         | .         | rs7702036 | .         | . | . | .     |
| TPR:1 ENST0000.   | 1q3. | .         | .         | .         | .         | . | . | .     |
| . ENST0000.       | 1q3. | .         | .         | .         | .         | . | . | .     |
| . ENST0000.       | 1q3. | .         | .         | .         | .         | . | . | .     |
| KIF21B ENST0000.  | 1q3. | Sc.       | .         | rs3712350 | .         | . | . | .     |
| . ENST0000.       | 1q3. | .         | .         | rs3723002 | .         | . | . | .     |
| NAV1:1 ENST0000.  | 1q3. | .         | .         | rs3694010 | ID.       | . | . | .     |
| . ENST0000.       | 1q3. | .         | .         | .         | .         | . | . | .     |
| . ENST0000.       | 1q3. | .         | .         | rs1044866 | .         | . | . | .     |
| . ENST0000.       | 1q3. | .         | .         | .         | .         | . | . | .     |
| C4BPA ENST0000.   | 1q3. | .         | .         | .         | .         | . | . | .     |
| . ENST0000.       | 1q3. | Score=0.9 | .         | .         | .         | . | . | .     |
| . ENST0000.       | 1q3. | .         | .         | .         | .         | . | . | .     |
| . ENST0000.       | 1q3. | .         | .         | .         | .         | . | . | .     |
| . ENST0000.       | 1q3. | .         | .         | .         | .         | . | . | .     |
| . ENST0000.       | 1q3. | .         | .         | rs9188348 | .         | . | . | .     |
| FLVCR ENST0000.   | 1q3. | .         | .         | .         | .         | . | . | .     |
| RPS6K ENST0000.   | 1q3. | Sc.       | .         | .         | .         | . | . | .     |
| . ENST0000.       | 1q4. | .         | .         | .         | .         | . | . | .     |
| . ENST0000.       | 1q4. | .         | .         | .         | .         | . | . | .     |
| USH2A ENST0000.   | 1q4. | .         | .         | rs9106912 | .         | . | . | .     |
| . ENST0000.       | 1q4. | .         | .         | .         | .         | . | . | .     |
| USH2A ENST0000.   | 1q4. | .         | .         | rs7564262 | ID.       | . | . | .     |
| . ENST0000.       | 1q4. | .         | .         | Score     | rs1909372 | . | . | 0.002 |
| . ENST0000.       | 1q4. | Sc.       | .         | .         | .         | . | . | .     |
| IARS2:1 ENST0000. | 1q4. | .         | .         | .         | .         | . | . | .     |
| IARS2:1 ENST0000. | 1q4. | .         | .         | rs7799500 | ID.       | . | . | .     |
| MARC2 ENST0000.   | 1q4. | Sc.       | .         | .         | .         | . | . | .     |
| DISP1:1 ENST0000. | 1q4. | .         | .         | .         | .         | . | . | .     |
| . ENST0000.       | 1q4. | .         | .         | Score.    | .         | . | . | .     |
| . ENST0000.       | 1q4. | .         | .         | .         | .         | . | . | .     |
| LEFTY:1 ENST0000. | 1q4. | Sc        | Score=0.9 | .         | .         | . | . | .     |
| . ENST0000.       | 1q4. | .         | .         | Score     | rs9303868 | . | . | .     |
| . ENST0000.       | 1q4. | .         | .         | .         | .         | . | . | .     |
| OBSC1 ENST0000.   | 1q4. | Sc.       | .         | .         | .         | . | . | .     |
| TRIM6:1 ENST0000. | 1q4. | .         | .         | .         | .         | . | . | .     |

|                  |      |            |   |                     |   |   |   |       |
|------------------|------|------------|---|---------------------|---|---|---|-------|
| . ENST0000.      | 1q4. | .          | . | .                   | . | . | . | .     |
| KCNK1 ENST0000.  | 1q4. | Sc.        | . | rs1006991 ID.       | . | . | . | .     |
| . ENST0000.      | 1q4. | .          | . | rs3676265 ID.       | . | . | . | .     |
| . ENST0000.      | 1q4. | Score=0.9f | . | .                   | . | . | . | .     |
| . ENST0000.      | 1q4. | .          | . | .                   | . | . | . | .     |
| . ENST0000.      | 1q4. | .          | . | Score rs1000082.    | . | . | . | .     |
| . ENST0000.      | 1q4. | .          | . | rs1825931.          | . | . | . | .     |
| ZNF69 ENST0000.  | 1q4. | .          | . | rs7580154.          | . | . | . | .     |
| . ENST0000.      | 2p2. | .          | . | rs3724090.          | . | . | . | .     |
| . ENST0000.      | 2p2. | .          | . | rs7778730.          | . | . | . | .     |
| TRAPP ENST0000.  | 2p2. | .          | . | .                   | . | . | . | .     |
| TRAPP ENST0000.  | 2p2. | .          | . | rs5690508.          | . | . | . | 0.001 |
| . ENST0000.      | 2p2. | .          | . | .                   | . | . | . | .     |
| MBOA1 ENST0000.  | 2p2. | .          | . | rs7490370.          | . | . | . | .     |
| ADAM1 ENST0000.  | 2p2. | .          | . | rs3691590.          | . | . | . | .     |
| . ENST0000.      | 2p2. | .          | . | Score rs9653906.    | . | . | . | .     |
| . ENST0000.      | 2p2. | Sc.        | . | Score.              | . | . | . | .     |
| . ENST0000.      | 2p2. | .          | . | rs3765736.          | . | . | . | .     |
| VSNL1 ENST0000.  | 2p2. | Sc.        | . | rs3680831.          | . | . | . | .     |
| KCNS3 ENST0000.  | 2p2. | .          | . | rs7556987.          | . | . | . | .     |
| KLHL2 ENST0000.  | 2p2. | Sc.        | . | ID.                 | . | . | . | .     |
| . ENST0000.      | 2p2. | .          | . | rs5650507.          | . | . | . | .     |
| NCOA1 ENST0000.  | 2p2. | Sc.        | . | rs7736455.          | . | . | . | .     |
| EMILIN ENST0000. | 2p2. | .          | . | rs1479767.          | . | . | . | .     |
| CAD:NI ENST0000. | 2p2. | .          | . | .                   | . | . | . | .     |
| CAD:NI ENST0000. | 2p2. | .          | . | .                   | . | . | . | .     |
| . ENST0000.      | 2p2. | .          | . | .                   | . | . | . | .     |
| . ENST0000.      | 2p2. | .          | . | .                   | . | . | . | .     |
| BIRC6: ENST0000. | 2p2. | .          | . | rs7664313 ID.       | . | . | . | .     |
| . ENST0000.      | 2p2. | .          | . | Score rs1047800.    | . | . | . | .     |
| . ENST0000.      | 2p2. | .          | . | Score.              | . | . | . | .     |
| STRN: ENST0000.  | 2p2. | .          | . | .                   | . | . | . | .     |
| . ENST0000.      | 2p2. | .          | . | Score rs7725290 ID. | . | . | . | .     |
| . ENST0000.      | 2p2. | .          | . | .                   | . | . | . | .     |
| . ENST0000.      | 2p1. | .          | . | .                   | . | . | . | .     |
| . ENST0000.      | 2p1. | .          | . | .                   | . | . | . | .     |
| . ENST0000.      | 2p1. | .          | . | .                   | . | . | . | .     |
| SPTBN ENST0000.  | 2p1. | Sc.        | . | .                   | . | . | . | .     |
| . ENST0000.      | 2p1. | Sc.        | . | .                   | . | . | . | .     |
| . ENST0000.      | 2p1. | .          | . | Score rs7787019 ID. | . | . | . | .     |
| CCDC ENST0000.   | 2p1. | .          | . | rs7608139.          | . | . | . | .     |
| . ENST0000.      | 2p1. | Sc.        | . | .                   | . | . | . | .     |
| . ENST0000.      | 2p1. | .          | . | .                   | . | . | . | .     |
| . ENST0000.      | 2p1. | .          | . | .                   | . | . | . | .     |
| . ENST0000.      | 2p1. | .          | . | .                   | . | . | . | .     |
| ARHG ENST0000.   | 2p1. | .          | . | ID.                 | . | . | . | .     |
| . ENST0000.      | 2p1. | .          | . | .                   | . | . | . | .     |
| . ENST0000.      | 2p1. | .          | . | .                   | . | . | . | .     |
| . ENST0000.      | 2p1. | .          | . | .                   | . | . | . | .     |
| . ENST0000.      | 2p1. | .          | . | .                   | . | . | . | .     |
| EVA1A ENST0000.  | 2p1. | .          | . | rs7670256 ID.       | . | . | . | .     |
| DNAH ENST0000.   | 2p1. | .          | . | .                   | . | . | . | .     |
| . ENST0000.      | 2p1. | .          | . | rs1883943.          | . | . | . | .     |
| . ENST0000.      | 2p1. | .          | . | .                   | . | . | . | .     |





|        |          |     |    |           |       |           |    |   |   |   |   |       |
|--------|----------|-----|----|-----------|-------|-----------|----|---|---|---|---|-------|
| GORA5  | ENST0000 | 2q3 | .  | .         | .     | rs9215367 | .  | . | . | . | . | .     |
| .      | ENST0000 | 2q3 | .  | .         | Score | .         | .  | . | . | . | . | .     |
| .      | ENST0000 | 2q3 | .  | .         | .     | rs9638533 | .  | . | . | . | . | .     |
| .      | ENST0000 | 2q3 | .  | .         | .     | .         | .  | . | . | . | . | .     |
| .      | ENST0000 | 2q3 | .  | .         | .     | .         | .  | . | . | . | . | .     |
| .      | ENST0000 | 2q3 | .  | .         | Score | .         | .  | . | . | . | . | .     |
| .      | ENST0000 | 2q3 | .  | .         | .     | .         | .  | . | . | . | . | .     |
| .      | ENST0000 | 2q3 | .  | .         | Score | .         | ID | . | . | . | . | .     |
| .      | ENST0000 | 2q3 | .  | .         | .     | rs9603080 | .  | . | . | . | . | .     |
| DNAJC  | ENST0000 | 2q3 | .  | .         | .     | rs3772721 | .  | . | . | . | . | .     |
| FSIP2: | ENST0000 | 2q3 | .  | .         | .     | rs3766275 | .  | . | . | . | . | .     |
| FSIP2: | ENST0000 | 2q3 | .  | .         | .     | .         | .  | . | . | . | . | .     |
| .      | ENST0000 | 2q3 | .  | .         | .     | .         | .  | . | . | . | . | .     |
| .      | ENST0000 | 2q3 | .  | .         | .     | rs3768239 | .  | . | . | . | . | .     |
| .      | ENST0000 | 2q3 | .  | .         | .     | rs7715235 | .  | . | . | . | . | .     |
| .      | ENST0000 | 2q3 | Sc | c         | .     | .         | .  | . | . | . | . | .     |
| SDPR:  | ENST0000 | 2q3 | .  | .         | .     | .         | .  | . | . | . | . | .     |
| STK17  | ENST0000 | 2q3 | .  | .         | .     | .         | .  | . | . | . | . | .     |
| KCTD1  | ENST0000 | 2q3 | Sc | c         | .     | .         | .  | . | . | . | . | .     |
| CLK1:  | ENST0000 | 2q3 | Sc | c         | .     | .         | .  | . | . | . | . | .     |
| KIAA20 | ENST0000 | 2q3 | .  | .         | .     | rs5481928 | .  | . | . | . | . | .     |
| .      | ENST0000 | 2q3 | .  | .         | .     | rs1901033 | .  | . | . | . | . | 0.009 |
| RAPH1  | ENST0000 | 2q3 | .  | .         | Score | rs7778048 | .  | . | . | . | . | .     |
| EEF1B: | ENST0000 | 2q3 | .  | .         | .     | rs1477917 | ID | . | . | . | . | .     |
| .      | ENST0000 | 2q3 | Sc | c         | .     | rs5379398 | .  | . | . | . | . | 0.001 |
| CRYG   | ENST0000 | 2q3 | Sc | c         | .     | .         | .  | . | . | . | . | .     |
| .      | ENST0000 | 2q3 | .  | .         | .     | .         | .  | . | . | . | . | .     |
| UNC80  | ENST0000 | 2q3 | .  | .         | .     | .         | .  | . | . | . | . | .     |
| .      | ENST0000 | 2q3 | .  | .         | .     | .         | .  | . | . | . | . | .     |
| .      | ENST0000 | 2q3 | .  | .         | .     | .         | .  | . | . | . | . | .     |
| .      | ENST0000 | 2q3 | .  | .         | .     | .         | .  | . | . | . | . | .     |
| .      | ENST0000 | 2q3 | .  | .         | .     | .         | .  | . | . | . | . | .     |
| .      | ENST0000 | 2q3 | .  | .         | .     | .         | .  | . | . | . | . | .     |
| .      | ENST0000 | 2q3 | .  | .         | .     | .         | .  | . | . | . | . | .     |
| .      | ENST0000 | 2q3 | .  | .         | .     | .         | .  | . | . | . | . | .     |
| .      | ENST0000 | 2q3 | .  | .         | .     | .         | .  | . | . | . | . | .     |
| .      | ENST0000 | 2q3 | .  | .         | .     | .         | .  | . | . | . | . | .     |
| .      | ENST0000 | 2q3 | .  | .         | .     | .         | .  | . | . | . | . | .     |
| .      | ENST0000 | 2q3 | .  | .         | .     | rs5756405 | .  | . | . | . | . | .     |
| .      | ENST0000 | 2q3 | .  | .         | .     | .         | .  | . | . | . | . | .     |
| .      | ENST0000 | 2q3 | .  | .         | .     | rs3732211 | .  | . | . | . | . | .     |
| DNAJB  | ENST0000 | 2q3 | .  | .         | .     | .         | .  | . | . | . | . | .     |
| .      | ENST0000 | 2q3 | .  | .         | .     | rs7469670 | .  | . | . | . | . | .     |
| .      | ENST0000 | 2q3 | Sc | c         | .     | rs5290584 | .  | . | . | . | . | .     |
| EPHA4  | ENST0000 | 2q3 | .  | .         | .     | .         | .  | . | . | . | . | .     |
| IRS1:N | ENST0000 | 2q3 | .  | .         | .     | .         | .  | . | . | . | . | .     |
| .      | ENST0000 | 2q3 | .  | .         | .     | .         | .  | . | . | . | . | .     |
| .      | ENST0000 | 2q3 | .  | .         | .     | rs499449  | .  | . | . | . | . | 0.426 |
| NMUR'  | ENST0000 | 2q3 | .  | .         | .     | rs7533248 | .  | . | . | . | . | .     |
| .      | ENST0000 | 2q3 | .  | Score=0.9 | .     | .         | .  | . | . | . | . | .     |
| .      | ENST0000 | 2q3 | .  | Score=0.9 | .     | .         | .  | . | . | . | . | .     |
| .      | ENST0000 | 2q3 | .  | Score=0.9 | .     | .         | .  | . | . | . | . | .     |
| UNKN   | ENST0000 | 2q3 | Sc | c         | .     | rs2020267 | .  | . | . | . | . | .     |
| .      | ENST0000 | 2q3 | .  | .         | .     | rs1053770 | .  | . | . | . | . | .     |
| MROH:  | ENST0000 | 2q3 | .  | .         | .     | .         | .  | . | . | . | . | .     |
| .      | ENST0000 | 2q3 | .  | .         | .     | .         | .  | . | . | . | . | .     |
| PER2:  | ENST0000 | 2q3 | .  | .         | .     | rs7483373 | .  | . | . | . | . | .     |

|         |           |            |           |   |                     |   |   |   |       |
|---------|-----------|------------|-----------|---|---------------------|---|---|---|-------|
| .       | ENST0000. | 2q3.       | .         | . | .                   | . | . | . | .     |
| KIF1A:1 | ENST0000. | 2q3.       | .         | . | rs3776284.          | . | . | . | .     |
| .       | ENST0000. | 2q3.       | .         | . | rs1500761.          | . | . | . | 0.001 |
| .       | ENST0000. | 2q3.       | .         | . | .                   | . | . | . | .     |
| .       | ENST0000. | 2q3.       | .         | . | .                   | . | . | . | .     |
| .       | ENST0000. | 2q3.       | .         | . | .                   | . | . | . | .     |
| CHL1:1  | ENST0000. | 3p2.       | .         | . | rs3731564 ID:       | . | . | . | .     |
| .       | ENST0000. | 3p2.       | .         | . | Score rs5694312.    | . | . | . | .     |
| .       | ENST0000. | 3p2.       | .         | . | .                   | . | . | . | .     |
| .       | ENST0000. | 3p2.       | .         | . | Score.              | . | . | . | .     |
| .       | ENST0000. | 3p2.       | .         | . | Score rs7502023.    | . | . | . | .     |
| .       | ENST0000. | 3p2.       | .         | . | .                   | . | . | . | .     |
| CRELD   | ENST0000. | 3p2.       | Sc.       | . | rs7567892.          | . | . | . | .     |
| .       | ENST0000. | 3p2.       | Score=0.9 | . | .                   | . | . | . | .     |
| SLC6A   | ENST0000. | 3p2.       | Sc.       | . | .                   | . | . | . | .     |
| .       | ENST0000. | 3p2.       | .         | . | .                   | . | . | . | .     |
| .       | .         | 3p2.       | .         | . | .                   | . | . | . | .     |
| .       | ENST0000. | 3p2.       | .         | . | Score rs9925095.    | . | . | . | .     |
| .       | ENST0000. | 3p2.       | .         | . | .                   | . | . | . | .     |
| .       | ENST0000. | 3p2.       | .         | . | .                   | . | . | . | .     |
| CAPN7   | ENST0000. | 3p2.       | .         | . | .                   | . | . | . | .     |
| .       | ENST0000. | 3p2.       | .         | . | .                   | . | . | . | .     |
| .       | ENST0000. | 3p2.       | .         | . | .                   | . | . | . | .     |
| NR1D2   | ENST0000. | 3p2.       | .         | . | .                   | . | . | . | .     |
| .       | ENST0000. | 3p2.       | .         | . | .                   | . | . | . | .     |
| .       | .         | 3p2.       | .         | . | Score.              | . | . | . | .     |
| .       | ENST0000. | 3p2.       | .         | . | Score rs8972401 ID: | . | . | . | .     |
| TGFBR   | ENST0000. | 3p2.       | .         | . | rs1124655.          | . | . | . | .     |
| .       | ENST0000  | hsa-mir-46 | 3p2.      | . | Score.              | . | . | . | .     |
| UNKN    | ENST0000. | 3p2.       | .         | . | rs7802104.          | . | . | . | .     |
| .       | ENST0000. | 3p2.       | .         | . | .                   | . | . | . | .     |
| DCLK3   | ENST0000. | 3p2.       | .         | . | rs5407838.          | . | . | . | 0.001 |
| .       | ENST0000. | 3p2.       | .         | . | rs5599017.          | . | . | . | .     |
| GOLG7   | ENST0000. | 3p2.       | .         | . | .                   | . | . | . | .     |
| .       | ENST0000. | 3p2.       | Sc.       | . | rs3732183.          | . | . | . | .     |
| .       | ENST0000. | 3p2.       | .         | . | Score.              | . | . | . | .     |
| SCN10   | ENST0000. | 3p2.       | .         | . | rs7485706 ID:       | . | . | . | .     |
| .       | ENST0000. | 3p2.       | .         | . | .                   | . | . | . | .     |
| CCR9:1  | ENST0000. | 3p2.       | .         | . | rs7745693.          | . | . | . | .     |
| .       | ENST0000. | 3p2.       | .         | . | Score.              | . | . | . | .     |
| .       | ENST0000. | 3p2.       | .         | . | .                   | . | . | . | .     |
| CCDC5   | ENST0000. | 3p2.       | .         | . | rs7512571.          | . | . | . | .     |
| .       | ENST0000. | 3p2.       | .         | . | rs5304720.          | . | . | . | .     |
| NCKIP1  | ENST0000. | 3p2.       | .         | . | rs3713830.          | . | . | . | .     |
| WDR6:   | ENST0000. | 3p2.       | .         | . | .                   | . | . | . | .     |
| QRICH   | ENST0000. | 3p2.       | .         | . | rs2001906.          | . | . | . | .     |
| USP4:1  | ENST0000. | 3p2.       | .         | . | .                   | . | . | . | .     |
| BSN:NI  | ENST0000. | 3p2.       | .         | . | .                   | . | . | . | .     |
| .       | ENST0000. | 3p2.       | .         | . | .                   | . | . | . | .     |
| UNKN    | ENST0000. | 3p2.       | Sc.       | . | rs7596904.          | . | . | . | .     |
| .       | ENST0000. | 3p2.       | .         | . | rs1821535.          | . | . | . | .     |
| .       | ENST0000. | 3p2.       | .         | . | .                   | . | . | . | .     |
| PCBP4   | ENST0000. | 3p2.       | .         | . | rs7780907.          | . | . | . | .     |
| .       | ENST0000. | 3p2.       | .         | . | .                   | . | . | . | .     |

|                       |      |             |   |                       |   |   |   |   |       |
|-----------------------|------|-------------|---|-----------------------|---|---|---|---|-------|
| . ENST0000.           | 3p2. | .           | . | .                     | . | . | . | . | .     |
| . ENST0000.           | 3p2. | .           | . | Score.                | . | . | . | . | .     |
| . ENST0000.           | 3p2. | .           | . | .                     | . | . | . | . | .     |
| . ENST0000.           | 3p2. | .           | . | rs9624625.            | . | . | . | . | .     |
| . ENST0000.           | 3p2. | .           | . | .                     | . | . | . | . | .     |
| PBRM1 ENST0000.       | 3p2. | .           | . | .                     | . | . | . | . | .     |
| CACNA ENST0000.       | 3p2. | Scc.        | . | .                     | . | . | . | . | .     |
| . ENST0000.           | 3p2. | .           | . | rs2000990 ID.         | . | . | . | . | .     |
| . ENST0000.           | 3p1. | .           | . | Score rs9858893.      | . | . | . | . | .     |
| . ENST0000.           | 3p1. | .           | . | Score rs1042360.      | . | . | . | . | .     |
| . ENST0000.           | 3p1. | .           | . | .                     | . | . | . | . | .     |
| . ENST0000.           | 3p1. | .           | . | .                     | . | . | . | . | .     |
| . ENST0000.           | 3p1. | .           | . | .                     | . | . | . | . | .     |
| . ENST0000.           | 3p1. | .           | . | .                     | . | . | . | . | .     |
| ADAM1 ENST0000.       | 3p1. | .           | . | rs7458693.            | . | . | . | . | .     |
| LMOD3 ENST0000.       | 3p1. | .           | . | .                     | . | . | . | . | .     |
| MITF:N ENST0000.      | 3p1. | .           | . | .                     | . | . | . | . | .     |
| . ENST0000.           | 3p1. | Score=0.94. | . | rs7794528 ID.         | . | . | . | . | .     |
| MINA:N ENST0000.      | 3q1. | .           | . | .                     | . | . | . | . | .     |
| . ENST0000.           | 3q1. | .           | . | .                     | . | . | . | . | .     |
| . ENST0000.           | 3q1. | .           | . | .                     | . | . | . | . | .     |
| . ENST0000.           | 3q1. | .           | . | .                     | . | . | . | . | .     |
| CFAP4 ENST0000.       | 3q1. | .           | . | .                     | . | . | . | . | .     |
| . ENST0000.           | 3q1. | Scc.        | . | .                     | . | . | . | . | .     |
| . ENST0000.           | 3q1. | .           | . | .                     | . | . | . | . | .     |
| STXBP ENST0000.       | 3q1. | .           | . | rs3684939.            | . | . | . | . | .     |
| . ENST0000.           | 3q2. | .           | . | rs1001693 ID.         | . | . | . | . | .     |
| . ENST0000.           | 3q2. | Score=0.94. | . | rs1465223.            | . | . | . | . | .     |
| . ENST0000.           | 3q2. | .           | . | .                     | . | . | . | . | .     |
| PLXNA ENST0000.       | 3q2. | .           | . | rs5528272.            | . | . | . | . | 0.001 |
| TPRA1 ENST0000.       | 3q2. | Scc.        | . | rs7511092.            | . | . | . | . | .     |
| . ENST0000.           | 3q2. | .           | . | .                     | . | . | . | . | .     |
| . ENST0000.           | 3q2. | Score=0.92. | . | rs5631647.            | . | . | . | . | .     |
| . ENST0000.           | 3q2. | Score=0.91. | . | .                     | . | . | . | . | .     |
| NUDT1 ENST0000.       | 3q2. | .           | . | .                     | . | . | . | . | .     |
| . ENST0000.           | 3q2. | .           | . | .                     | . | . | . | . | .     |
| PRR23 ENST0000.       | 3q2. | Score=0.90. | . | .                     | . | . | . | . | .     |
| PRR23 ENST0000.       | 3q2. | Score=0.90. | . | .                     | . | . | . | . | .     |
| CLSTN ENST0000.       | 3q2. | Scc.        | . | rs1408440 ID.         | . | . | . | . | .     |
| RASA2 ENST0000.       | 3q2. | .           | . | .                     | . | . | . | . | .     |
| . ENST0000.           | 3q2. | .           | . | .                     | . | . | . | . | .     |
| . ENST0000.           | 3q2. | .           | . | rs7685217 ID: Likely. | . | . | . | . | 0.002 |
| PCOLC ENST0000.       | 3q2. | .           | . | rs7705095.            | . | . | . | . | .     |
| . ENST0000.           | 3q2. | .           | . | ID.                   | . | . | . | . | .     |
| . ENST0000.           | 3q2. | .           | . | .                     | . | . | . | . | .     |
| EIF2A:I ENST0000.     | 3q2. | .           | . | rs7605662.            | . | . | . | . | .     |
| . ENST0000.           | 3q2. | .           | . | .                     | . | . | . | . | .     |
| . ENST0000 hsa-mir-16 | 3q2. | Scc.        | . | .                     | . | . | . | . | .     |
| . ENST0000.           | 3q2. | .           | . | .                     | . | . | . | . | .     |
| . ENST0000.           | 3q2. | .           | . | Score.                | . | . | . | . | .     |
| SKIL:N ENST0000.      | 3q2. | Scc.        | . | rs5388049.            | . | . | . | . | .     |
| . ENST0000.           | 3q2. | .           | . | Score rs9368630.      | . | . | . | . | .     |
| . ENST0000.           | 3q2. | Score=0.91. | . | ID.                   | . | . | . | . | .     |
| USP13 ENST0000.       | 3q2. | Scc.        | . | rs7652687.            | . | . | . | . | .     |

|                  |      |     |   |                     |                  |   |       |
|------------------|------|-----|---|---------------------|------------------|---|-------|
| . ENST0000.      | 3q2. | .   | . | rs5714458 ID.       | .                | . | 0.001 |
| MCCC7 ENST0000.  | 3q2. | .   | . | .                   | .                | . | .     |
| KLHL6: ENST0000. | 3q2. | .   | . | .                   | .                | . | .     |
| . ENST0000.      | 3q2. | .   | . | rs9015268.          | .                | . | .     |
| . ENST0000.      | 3q2. | .   | . | Score.              | .                | . | .     |
| ECE2: ENST0000.  | 3q2. | .   | . | rs3748943 ID.       | .                | . | .     |
| . ENST0000.      | 3q2. | .   | . | .                   | .                | . | .     |
| LPP: N ENST0000. | 3q2. | Sc. | . | rs7531929.          | .                | . | .     |
| . ENST0000.      | 3q2. | .   | . | rs7777314.          | .                | . | .     |
| . . .            | 3q2. | .   | . | Score=0.9.          | .                | . | .     |
| . . .            | 3q2. | .   | . | Score=0.9.          | Score.           | . | .     |
| . ENST0000.      | 3q2. | .   | . | .                   | .                | . | .     |
| . ENST0000.      | 3q2. | .   | . | Score.              | .                | . | .     |
| . ENST0000.      | 3q2. | .   | . | Score rs8866852.    | .                | . | .     |
| . ENST0000.      | 3q2. | .   | . | Score=0.9.          | rs7637750 ID.    | . | .     |
| . ENST0000.      | 4p1. | .   | . | Score.              | .                | . | .     |
| UNKNC ENST0000.  | 4p1. | Sc. | . | rs7620115.          | .                | . | .     |
| . ENST0000.      | 4p1. | .   | . | .                   | .                | . | .     |
| . ENST0000.      | 4p1. | .   | . | rs9125004.          | .                | . | .     |
| . ENST0000.      | 4p1. | .   | . | .                   | .                | . | .     |
| . ENST0000.      | 4p1. | .   | . | Score.              | .                | . | .     |
| . ENST0000.      | 4p1. | .   | . | rs5508099.          | .                | . | .     |
| . ENST0000.      | 4p1. | .   | . | .                   | .                | . | .     |
| . ENST0000.      | 4p1. | .   | . | Score.              | .                | . | .     |
| . . .            | 4p1. | .   | . | rs9333127.          | .                | . | .     |
| ADRA2 ENST0000.  | 4p1. | .   | . | Score.              | .                | . | .     |
| WFS1: ENST0000.  | 4p1. | .   | . | rs5603533.          | other .          | . | 0.001 |
| . ENST0000.      | 4p1. | .   | . | .                   | .                | . | .     |
| . ENST0000.      | 4p1. | .   | . | ID.                 | .                | . | .     |
| AFAP1 ENST0000.  | 4p1. | .   | . | rs3763511.          | .                | . | .     |
| . ENST0000.      | 4p1. | .   | . | rs2006520.          | .                | . | 0.008 |
| SH3TC ENST0000.  | 4p1. | .   | . | rs7521101.          | .                | . | .     |
| ZNF51 ENST0000.  | 4p1. | .   | . | rs7804064 ID.       | .                | . | .     |
| BOD1L ENST0000.  | 4p1. | .   | . | Score.              | .                | . | .     |
| CC2D2 ENST0000.  | 4p1. | Sc. | . | .                   | .                | . | .     |
| . ENST0000.      | 4p1. | .   | . | .                   | .                | . | .     |
| CCDC1 ENST0000.  | 4p1. | .   | . | .                   | .                | . | .     |
| . . .            | 4p1. | .   | . | Score rs1420745.    | .                | . | 0.01  |
| . ENST0000.      | 4p1. | .   | . | rs5344165.          | .                | . | .     |
| . ENST0000.      | 4p1. | .   | . | Score=0.9.          | .                | . | .     |
| . ENST0000.      | 4p1. | .   | . | Score=0.9.          | .                | . | .     |
| RHOH: ENST0000.  | 4p1. | .   | . | rs7759148 ID.       | .                | . | .     |
| NSUN7 ENST0000.  | 4p1. | Sc. | . | .                   | .                | . | .     |
| . ENST0000.      | 4p1. | .   | . | Score rs2856467 ID. | .                | . | .     |
| . ENST0000.      | 4p1. | .   | . | Score=0.9.          | rs1451863 ID.    | . | .     |
| . . .            | 4p1. | .   | . | Score=0.9.          | Score rs5941177. | . | .     |
| LRR6 ENST0000.   | 4q1. | .   | . | ID.                 | .                | . | .     |
| . ENST0000.      | 4q1. | Sc. | . | .                   | .                | . | .     |
| . ENST0000.      | 4q1. | .   | . | .                   | .                | . | .     |
| . ENST0000.      | 4q1. | .   | . | .                   | .                | . | .     |
| . ENST0000.      | 4q1. | .   | . | .                   | .                | . | .     |
| UGT2B ENST0000.  | 4q1. | .   | . | ID.                 | .                | . | .     |
| . ENST0000.      | 4q1. | .   | . | .                   | .                | . | .     |
| . ENST0000.      | 4q1. | .   | . | rs7619680.          | .                | . | .     |



|                             |      |     |   |                 |               |   |   |   |   |
|-----------------------------|------|-----|---|-----------------|---------------|---|---|---|---|
| . ENST0000.                 | 5p1. | Sc. | . | .               | .             | . | . | . | . |
| . ENST0000.                 | 5p1. | .   | . | .               | .             | . | . | . | . |
| . ENST0000.                 | 5p1. | .   | . | .               | .             | . | . | . | . |
| .                           | 5q1. | .   | . | Score.          | .             | . | . | . | . |
| .                           | 5q1. | .   | . | Score rs4327635 | .             | . | . | . | . |
| .                           | 5q1. | .   | . | Score.          | .             | . | . | . | . |
| ACTBL ENST0000.             | 5q1. | .   | . | rs2005764       | .             | . | . | . | . |
| PDE4D ENST0000.             | 5q1. | Sc. | . | .               | .             | . | . | . | . |
| .                           | 5q1. | .   | . | Score=0.9!      | rs5582099     | . | . | . | . |
| . ENST0000.                 | 5q1. | Sc. | . | .               | .             | . | . | . | . |
| . ENST0000.                 | 5q1. | .   | . | .               | .             | . | . | . | . |
| . ENST0000.                 | 5q1. | .   | . | .               | rs5672287     | . | . | . | . |
| MAST4 ENST0000.             | 5q1. | Sc. | . | .               | .             | . | . | . | . |
| MAST4 ENST0000.             | 5q1. | Sc. | . | .               | rs2016310     | . | . | . | . |
| PIK3R1 ENST0000.            | 5q1. | .   | . | .               | .             | . | . | . | . |
| . ENST0000.                 | 5q1. | .   | . | Score.          | .             | . | . | . | . |
| . ENST0000.                 | 5q1. | .   | . | Score=0.9!      | .             | . | . | . | . |
| . ENST0000.                 | 5q1. | .   | . | .               | .             | . | . | . | . |
| . ENST0000.                 | 5q1. | .   | . | Score.          | .             | . | . | . | . |
| . ENST0000.                 | 5q1. | .   | . | .               | .             | . | . | . | . |
| ACOT1 ENST0000.             | 5q1. | .   | . | .               | .             | . | . | . | . |
| . ENST0000.                 | 5q1. | .   | . | Score=0.8!      | .             | . | . | . | . |
| . ENST0000.                 | 5q1. | .   | . | .               | rs3717547 ID: | . | . | . | . |
| .                           | 5q1. | .   | . | Score rs7815826 | .             | . | . | . | . |
| GPR98 ENST0000.             | 5q1. | .   | . | .               | .             | . | . | . | . |
| KIAA08 ENST0000.            | 5q1. | .   | . | .               | .             | . | . | . | . |
| ARSK:† ENST0000.            | 5q1. | .   | . | .               | rs7633968 ID: | . | . | . | . |
| . ENST0000.                 | 5q2. | .   | . | Score=0.9!      | .             | . | . | . | . |
| PAM:N ENST0000.             | 5q2. | Sc. | . | .               | .             | . | . | . | . |
| . ENST0000.                 | 5q2. | .   | . | .               | rs1114874     | . | . | . | . |
| . ENST0000.                 | 5q2. | .   | . | .               | .             | . | . | . | . |
| EPB41 ENST0000.             | 5q2. | .   | . | .               | .             | . | . | . | . |
| SEMA6 ENST0000.             | 5q2. | .   | . | .               | .             | . | . | . | . |
| . ENST0000.                 | 5q2. | .   | . | .               | .             | . | . | . | . |
| UNKNC ENST0000.             | 5q3. | Sc. | . | .               | rs9346631     | . | . | . | . |
| . ENST0000.                 | 5q3. | .   | . | .               | .             | . | . | . | . |
| FSTL4: ENST0000.            | 5q3. | Sc. | . | .               | rs7465490     | . | . | . | . |
| .                           | 5q3. | .   | . | .               | .             | . | . | . | . |
| . ENST0000.                 | 5q3. | .   | . | .               | rs7470418     | . | . | . | . |
| CDC25 ENST0000.             | 5q3. | .   | . | .               | rs7665720 ID: | . | . | . | . |
| CDC25 ENST0000.             | 5q3. | .   | . | .               | .             | . | . | . | . |
| EGR1:† ENST0000.            | 5q3. | .   | . | Score.          | .             | . | . | . | . |
| EGR1:† ENST0000.            | 5q3. | .   | . | Score rs7721589 | .             | . | . | . | . |
| ANKHC ENST0000.             | 5q3. | Sc. | . | .               | .             | . | . | . | . |
| PCDH <sup>A</sup> ENST0000. | 5q3. | .   | . | Score=0.9!      | .             | . | . | . | . |
| PCDH <sup>A</sup> ENST0000. | 5q3. | .   | . | .               | ID:           | . | . | . | . |
| PCDH <sup>A</sup> ENST0000. | 5q3. | Sc. | . | .               | rs7823690 ID: | . | . | . | . |
| PCDHE ENST0000.             | 5q3. | .   | . | Score=0.9!      | ID:           | . | . | . | . |
| PCDHE ENST0000.             | 5q3. | .   | . | Score=0.9!      | .             | . | . | . | . |
| PCDHC ENST0000.             | 5q3. | .   | . | .               | .             | . | . | . | . |
| PCDHC ENST0000.             | 5q3. | .   | . | .               | rs9814581     | . | . | . | . |
| PCDHC ENST0000.             | 5q3. | Sc. | . | .               | rs5446331 ID: | . | . | . | . |
| PCDHC ENST0000.             | 5q3. | .   | . | .               | rs3769527 ID: | . | . | . | . |
| PCDHC ENST0000.             | 5q3. | Sc. | . | .               | rs7719463     | . | . | . | . |

|        |           |      |     |                     |            |       |
|--------|-----------|------|-----|---------------------|------------|-------|
| KIAA01 | ENST0000. | 5q3. | Sc. | rs2018026 ID.       |            | 0.004 |
| .      | ENST0000. | 5q3. | .   | Score rs1000063.    |            |       |
| .      | ENST0000. | 5q3. | .   | .                   |            |       |
| .      | ENST0000. | 5q3. | .   | .                   |            |       |
| SYNPC  | ENST0000. | 5q3. | .   | .                   |            |       |
| G3BP1  | ENST0000. | 5q3. | Sc  | Score=0.9.          |            |       |
| .      | ENST0000. | 5q3. | .   | rs5492040.          |            | 0.002 |
| RNF14  | ENST0000. | 5q3. | .   | rs5611223.          |            |       |
| TENM2  | ENST0000. | 5q3. | Sc. | .                   |            |       |
| TENM2  | ENST0000. | 5q3. | .   | .                   |            |       |
| WWC1   | ENST0000. | 5q3. | .   | rs1491693.          |            |       |
| RARS:1 | ENST0000. | 5q3. | .   | rs7577825 ID.       |            |       |
| .      | ENST0000. | 5q3. | .   | .                   |            |       |
| SH3PX  | ENST0000. | 5q3. | .   | .                   |            |       |
| .      | ENST0000. | 5q3. | .   | rs1822272.          |            |       |
| .      | ENST0000. | 5q3. | .   | .                   |            |       |
| .      | ENST0000. | 5q3. | Sc. | .                   |            |       |
| .      | ENST0000. | 5q3. | .   | .                   |            |       |
| .      | ENST0000. | 5q3. | .   | rs4551119.          |            |       |
| FGFR4  | ENST0000. | 5q3. | Sc. | rs5582208.          |            |       |
| .      | ENST0000. | 5q3. | .   | Score=0.9.          |            |       |
| .      | ENST0000. | 5q3. | .   | Score=0.9.          |            |       |
| .      | ENST0000. | 5q3. | .   | .                   |            |       |
| .      | ENST0000. | 5q3. | .   | Score=0.9.          | rs1025870. |       |
| .      | ENST0000. | 5q3. | Sc. | Score.              |            |       |
| .      | ENST0000. | 5q3. | .   | Score.              |            |       |
| RPP40  | ENST0000. | 6p2. | .   | rs7651293.          |            |       |
| .      | ENST0000. | 6p2. | .   | Score rs1023580.    |            |       |
| .      | ENST0000. | 6p2. | .   | rs1864505.          |            |       |
| .      | ENST0000. | 6p2. | .   | Score=0.9.          |            |       |
| .      | ENST0000. | 6p2. | .   | rs2004302.          |            |       |
| .      | ENST0000. | 6p2. | .   | .                   |            |       |
| .      | ENST0000. | 6p2. | .   | rs3692600 ID.       |            |       |
| HIVEP  | ENST0000. | 6p2. | .   | rs7468362.          |            |       |
| .      | ENST0000. | 6p2. | .   | rs7674897.          |            |       |
| .      | ENST0000. | 6p2. | .   | .                   |            |       |
| .      | .         | 6p2. | .   | Score=0.9.          |            |       |
| .      | ENST0000. | 6p2. | .   | Score=0.9.          |            |       |
| .      | ENST0000. | 6p2. | .   | Score=0.9.          |            |       |
| .      | ENST0000. | 6p2. | .   | .                   |            |       |
| .      | .         | 6p2. | .   | .                   |            |       |
| .      | ENST0000. | 6p2. | .   | Score.              |            |       |
| .      | ENST0000. | 6p2. | .   | .                   |            |       |
| .      | ENST0000. | 6p2. | .   | Score rs7653588 ID. |            |       |
| .      | ENST0000. | 6p2. | .   | Score=0.9.          |            |       |
| .      | ENST0000. | 6p2. | .   | rs7511377.          |            |       |
| .      | ENST0000. | 6p2. | .   | .                   |            |       |
| .      | ENST0000. | 6p2. | .   | .                   |            |       |
| PRRC2  | ENST0000. | 6p2. | .   | rs7792598.          |            |       |
| .      | ENST0000. | 6p2. | .   | .                   |            |       |
| .      | ENST0000. | 6p2. | .   | .                   |            |       |
| COL11. | ENST0000. | 6p2. | .   | rs1119219.          |            |       |
| COL11. | ENST0000. | 6p2. | Sc. | rs7759216.          |            |       |





|         |           |      |           |               |   |   |   |
|---------|-----------|------|-----------|---------------|---|---|---|
| UST:NI  | ENST0000. | 6q2. | Sc.       | rs7737449 ID. | . | . | . |
| GINM1   | ENST0000. | 6q2. | Sc.       | rs7774557.    | . | . | . |
| KATNA   | ENST0000. | 6q2. | Sc.       | .             | . | . | . |
| .       | ENST0000. | 6q2. | Score=0.9 | .             | . | . | . |
| .       | ENST0000. | 6q2. | .         | .             | . | . | . |
| .       | ENST0000. | 6q2. | .         | .             | . | . | . |
| .       | ENST0000. | 6q2. | .         | rs5290225.    | . | . | . |
| .       | ENST0000. | 6q2. | .         | ID.           | . | . | . |
| IPCEF1  | ENST0000. | 6q2. | .         | .             | . | . | . |
| SCAF8   | ENST0000. | 6q2. | .         | .             | . | . | . |
| ARID1E  | ENST0000. | 6q2. | .         | ID.           | . | . | . |
| .       | ENST0000. | 6q2. | .         | rs1015839.    | . | . | . |
| SOD2:1  | ENST0000. | 6q2. | Sc.       | .             | . | . | . |
| .       | ENST0000. | 6q2. | Score=0.9 | .             | . | . | . |
| .       | ENST0000. | 6q2. | Score.    | .             | . | . | . |
| .       | ENST0000. | 6q2. | Score=0.9 | .             | . | . | . |
| .       | ENST0000. | 6q2. | .         | .             | . | . | . |
| PARK2   | ENST0000. | 6q2. | .         | .             | . | . | . |
| QKI:NM  | ENST0000. | 6q2. | Sc.       | rs7739962.    | . | . | . |
| C6orf1  | ENST0000. | 6q2. | .         | rs2008105 ID. | . | . | . |
| .       | ENST0000. | 6q2. | Score=0.9 | rs7558449.    | . | . | . |
| .       | ENST0000. | 6q2. | .         | .             | . | . | . |
| FAM20   | ENST0000. | 7p2. | .         | .             | . | . | . |
| .       | .         | 7p2. | .         | .             | . | . | . |
| .       | ENST0000. | 7p2. | .         | .             | . | . | . |
| INTS1:1 | ENST0000. | 7p2. | .         | .             | . | . | . |
| INTS1:1 | ENST0000. | 7p2. | .         | .             | . | . | . |
| INTS1:1 | ENST0000. | 7p2. | Sc.       | rs7786995.    | . | . | . |
| .       | ENST0000. | 7p2. | .         | .             | . | . | . |
| .       | ENST0000. | 7p2. | Score.    | .             | . | . | . |
| CHST1   | ENST0000. | 7p2. | .         | rs5612232.    | . | . | . |
| .       | ENST0000. | 7p2. | .         | .             | . | . | . |
| .       | ENST0000. | 7p2. | .         | rs3699321.    | . | . | . |
| .       | ENST0000. | 7p2. | .         | .             | . | . | . |
| .       | ENST0000. | 7p2. | .         | rs5413152.    | . | . | . |
| CCZ1:1  | ENST0000. | 7p2. | Score=0.9 | .             | . | . | . |
| CYTH3   | ENST0000. | 7p2. | .         | .             | . | . | . |
| DAGLB   | ENST0000. | 7p2. | .         | rs7747652.    | . | . | . |
| GRID2I  | ENST0000. | 7p2. | Sc.       | .             | . | . | . |
| C7orf2  | ENST0000. | 7p2. | .         | .             | . | . | . |
| ZNF31   | ENST0000. | 7p2. | Sc.       | .             | . | . | . |
| .       | ENST0000. | 7p2. | Score=0.9 | rs7800175 ID. | . | . | . |
| .       | ENST0000. | 7p2. | Score=0.9 | rs8790524.    | . | . | . |
| .       | ENST0000. | 7p2. | Score=0.9 | rs3726603 ID. | . | . | . |
| COL28   | ENST0000. | 7p2. | .         | .             | . | . | . |
| MIOS:1  | ENST0000. | 7p2. | .         | ID.           | . | . | . |
| .       | ENST0000. | 7p2. | Score.    | .             | . | . | . |
| THSD7   | ENST0000. | 7p2. | .         | .             | . | . | . |
| .       | ENST0000. | 7p2. | .         | .             | . | . | . |
| DNAH1   | ENST0000. | 7p1. | .         | rs3710375.    | . | . | . |
| .       | ENST0000. | 7p1. | Score.    | .             | . | . | . |
| .       | ENST0000. | 7p1. | .         | .             | . | . | . |
| HIBADI  | ENST0000. | 7p1. | .         | rs1427054.    | . | . | . |
| NOD1:1  | ENST0000. | 7p1. | .         | .             | . | . | . |

|        |           |      |    |           |                 |   |   |   |       |
|--------|-----------|------|----|-----------|-----------------|---|---|---|-------|
| .      | .         | 7p1. | .  | .         | .               | . | . | . | .     |
| .      | ENST0000. | 7p1. | Sc | Score=0.9 | .               | . | . | . | .     |
| FKBP9  | ENST0000. | 7p1. | .  | Score=0.9 | rs7507081       | . | . | . | .     |
| .      | ENST0000. | 7p1. | .  | .         | .               | . | . | . | .     |
| .      | ENST0000. | 7p1. | .  | Score=0.9 | .               | . | . | . | .     |
| .      | ENST0000. | 7p1. | .  | Score=0.9 | rs7696767 ID    | . | . | . | .     |
| .      | ENST0000. | 7p1. | Sc | Score=0.9 | .               | . | . | . | .     |
| HECW   | ENST0000. | 7p1. | .  | .         | rs7755650 ID    | . | . | . | .     |
| .      | ENST0000. | 7p1. | .  | .         | .               | . | . | . | .     |
| UNKN   | ENST0000. | 7p1. | .  | .         | .               | . | . | . | .     |
| .      | ENST0000. | 7p1. | .  | .         | Score rs1113701 | . | . | . | .     |
| .      | ENST0000. | 7p1. | .  | .         | .               | . | . | . | .     |
| .      | ENST0000. | 7p1. | .  | .         | .               | . | . | . | .     |
| ADCY1  | ENST0000. | 7p1. | .  | .         | rs7476235       | . | . | . | .     |
| .      | ENST0000. | 7p1. | .  | .         | rs1024757       | . | . | . | .     |
| .      | ENST0000. | 7p1. | .  | .         | .               | . | . | . | .     |
| UNKN   | ENST0000. | 7p1. | .  | .         | .               | . | . | . | .     |
| NUPR1  | ENST0000. | 7p1. | .  | .         | .               | . | . | . | .     |
| .      | .         | 7p1. | .  | Score=0.9 | .               | . | . | . | .     |
| .      | ENST0000. | 7p1. | .  | Score=0.9 | .               | . | . | . | .     |
| .      | ENST0000. | 7p1. | .  | Score=0.9 | .               | . | . | . | .     |
| .      | ENST0000. | 7p1. | .  | Score=0.9 | rs3749762       | . | . | . | .     |
| .      | ENST0000. | 7p1. | .  | Score=0.9 | .               | . | . | . | .     |
| .      | ENST0000. | 7p1. | .  | Score=0.9 | rs8799601 ID    | . | . | . | .     |
| .      | ENST0000. | 7p1. | .  | Score=0.9 | .               | . | . | . | .     |
| .      | ENST0000. | 7q1. | .  | Score=0.9 | .               | . | . | . | .     |
| .      | ENST0000. | 7q1. | .  | Score=0.9 | .               | . | . | . | .     |
| .      | .         | 7q1. | .  | Score=0.9 | .               | . | . | . | .     |
| .      | .         | 7q1. | .  | Score=0.9 | .               | . | . | . | .     |
| .      | ENST0000. | 7q1. | .  | Score=0.9 | Score rs6156381 | . | . | . | .     |
| .      | ENST0000. | 7q1. | .  | Score=0.9 | ID              | . | . | . | .     |
| .      | ENST0000. | 7q1. | .  | Score=0.9 | .               | . | . | . | .     |
| .      | ENST0000. | 7q1. | .  | Score=0.9 | rs5480693 ID    | . | . | . | 0.015 |
| WBSCI  | ENST0000. | 7q1. | Sc | .         | rs7706902       | . | . | . | .     |
| .      | ENST0000. | 7q1. | .  | Score=0.9 | Score rs5574064 | . | . | . | .     |
| .      | ENST0000. | 7q1. | .  | Score=0.9 | .               | . | . | . | .     |
| .      | ENST0000. | 7q1. | .  | Score=0.9 | .               | . | . | . | .     |
| FZD9   | ENST0000. | 7q1. | .  | .         | .               | . | . | . | .     |
| BAZ1B  | ENST0000. | 7q1. | .  | .         | rs7822351       | . | . | . | .     |
| .      | ENST0000. | 7q1. | .  | .         | .               | . | . | . | .     |
| .      | ENST0000. | 7q1. | .  | .         | .               | . | . | . | .     |
| GTF2IF | ENST0000. | 7q1. | .  | .         | rs7822129       | . | . | . | .     |
| .      | ENST0000. | 7q1. | .  | Score=0.9 | rs3705131       | . | . | . | .     |
| .      | ENST0000. | 7q1. | .  | Score=0.9 | rs8799812       | . | . | . | .     |
| .      | ENST0000. | 7q1. | .  | Score=0.9 | rs1493360       | . | . | . | 0.569 |
| .      | ENST0000. | 7q1. | .  | Score=0.9 | rs1403890       | . | . | . | .     |
| .      | ENST0000. | 7q2. | .  | .         | .               | . | . | . | .     |
| .      | ENST0000. | 7q2. | .  | .         | .               | . | . | . | .     |
| PCLO   | ENST0000. | 7q2. | .  | .         | .               | . | . | . | .     |
| CDK14  | ENST0000. | 7q2. | .  | .         | rs1413343       | . | . | . | .     |
| .      | ENST0000. | 7q2. | .  | .         | rs9879024       | . | . | . | .     |
| COL1A  | ENST0000. | 7q2. | Sc | .         | rs7641741 ID    | . | . | . | .     |
| .      | ENST0000. | 7q2. | .  | .         | .               | . | . | . | .     |
| .      | ENST0000. | 7q2. | .  | .         | .               | . | . | . | .     |

|                 |      |     |             |               |   |   |       |
|-----------------|------|-----|-------------|---------------|---|---|-------|
| . ENST0000.     | 7q2. | .   | .           | ID.           | . | . | .     |
| . ENST0000.     | 7q2. | .   | .           | rs7821462.    | . | . | .     |
| TRRAF ENST0000. | 7q2. | Sc. | .           | rs7752142 ID. | . | . | .     |
| . ENST0000.     | 7q2. | .   | .           | .             | . | . | .     |
| . ENST0000.     | 7q2. | .   | .           | rs9034524 ID. | . | . | .     |
| PCOLC ENST0000. | 7q2. | Sc. | .           | rs5767320.    | . | . | .     |
| ACTL6 ENST0000. | 7q2. | Sc. | .           | .             | . | . | .     |
| MUC12 ENST0000. | 7q2. | .   | Score=0.9f. | rs7641678.    | . | . | .     |
| . ENST0000.     | 7q2. | .   | .           | .             | . | . | .     |
| CUX1: ENST0000. | 7q2. | .   | .           | .             | . | . | .     |
| RASA4 ENST0000. | 7q2. | .   | Score=0.9f. | rs7590335.    | . | . | .     |
| . ENST0000.     | 7q2. | .   | Score=0.9f. | rs4729845 ID. | . | . | .     |
| PSMC2 ENST0000. | 7q2. | .   | .           | .             | . | . | .     |
| ORC5: ENST0000. | 7q2. | Sc. | .           | .             | . | . | .     |
| LRRN3 ENST0000. | 7q3. | Sc. | .           | .             | . | . | .     |
| . ENST0000.     | 7q3. | .   | .           | .             | . | . | .     |
| . ENST0000.     | 7q3. | .   | .           | .             | . | . | .     |
| . ENST0000.     | 7q3. | .   | .           | rs1457073.    | . | . | .     |
| . ENST0000.     | 7q3. | .   | .           | .             | . | . | .     |
| GPR37 ENST0000. | 7q3. | .   | .           | rs3755434.    | . | . | .     |
| . ENST0000.     | 7q3. | .   | Score=0.9f. | .             | . | . | .     |
| FLNC: ENST0000. | 7q3. | .   | Score=0.9f. | .             | . | . | .     |
| SMO: ENST0000.  | 7q3. | .   | .           | rs2006779.    | . | . | .     |
| . ENST0000.     | 7q3. | .   | .           | .             | . | . | .     |
| PLXNA ENST0000. | 7q3. | .   | .           | rs3679590.    | . | . | .     |
| . ENST0000.     | 7q3. | Sc. | .           | .             | . | . | .     |
| . ENST0000.     | 7q3. | .   | .           | .             | . | . | .     |
| DGKI: ENST0000. | 7q3. | .   | .           | .             | . | . | .     |
| CREB3 ENST0000. | 7q3. | .   | .           | .             | . | . | .     |
| . ENST0000.     | 7q3. | .   | .           | rs1825415.    | . | . | 0.007 |
| . ENST0000.     | 7q3. | .   | .           | .             | . | . | .     |
| . ENST0000.     | 7q3. | .   | .           | .             | . | . | .     |
| MGAM: ENST0000. | 7q3. | .   | .           | rs7825497 ID. | . | . | .     |
| UNKNC ENST0000. | 7q3. | .   | .           | .             | . | . | .     |
| . ENST0000.     | 7q3. | .   | .           | .             | . | . | .     |
| . ENST0000.     | 7q3. | .   | .           | .             | . | . | .     |
| . ENST0000.     | 7q3. | .   | Score=0.9f. | .             | . | . | .     |
| . ENST0000.     | 7q3. | .   | .           | rs7663697.    | . | . | .     |
| . ENST0000.     | 7q3. | .   | .           | .             | . | . | .     |
| . ENST0000.     | 7q3. | .   | .           | rs3733853 ID. | . | . | .     |
| CNTNA ENST0000. | 7q3. | .   | .           | rs7598872.    | . | . | .     |
| . ENST0000.     | 7q3. | .   | .           | rs8019707.    | . | . | 0.013 |
| SSPO: ENST0000. | 7q3. | .   | .           | rs1447568.    | . | . | .     |
| . ENST0000.     | 7q3. | .   | .           | .             | . | . | .     |
| . ENST0000.     | 7q3. | .   | .           | .             | . | . | .     |
| UNKNC ENST0000. | 7q3. | .   | .           | .             | . | . | .     |
| CDK5: ENST0000. | 7q3. | Sc. | .           | .             | . | . | .     |
| TMUB1 ENST0000. | 7q3. | Sc. | .           | .             | . | . | .     |
| . ENST0000.     | 7q3. | .   | .           | .             | . | . | .     |
| . ENST0000.     | 7q3. | .   | .           | .             | . | . | .     |
| KMT2C ENST0000. | 7q3. | .   | .           | rs3761181.    | . | . | .     |
| . ENST0000.     | 7q3. | .   | Score=0.9f. | .             | . | . | .     |
| . ENST0000.     | 7q3. | .   | Score=0.9f. | rs9367654.    | . | . | .     |

|                  |      |     |   |                         |   |   |   |       |   |
|------------------|------|-----|---|-------------------------|---|---|---|-------|---|
| . ENST0000.      | 7q3. | .   | . | .                       | . | . | . | .     | . |
| . ENST0000.      | 7q3. | .   | . | Score rs1056749.        | . | . | . | .     | . |
| . ENST0000.      | 7q3. | .   | . | rs3696336.              | . | . | . | .     | . |
| . ENST0000.      | 7q3. | .   | . | .                       | . | . | . | .     | . |
| . ENST0000.      | 8p2. | .   | . | .                       | . | . | . | .     | . |
| CLN8: ENST0000.  | 8p2. | Sc. | . | .                       | . | . | . | .     | . |
| XKR5: ENST0000.  | 8p2. | .   | . | rs1995647.              | . | . | . | .     | . |
| . ENST0000.      | 8p2. | .   | . | .                       | . | . | . | .     | . |
| USP17: ENST0000. | 8p2. | .   | . | Score=0.9 rs7692119.    | . | . | . | .     | . |
| . . .            | 8p2. | .   | . | Score=0.9 rs2946428 ID. | . | . | . | .     | . |
| CLDN2 ENST0000.  | 8p2. | .   | . | rs7810476.              | . | . | . | .     | . |
| RP1L1: ENST0000. | 8p2. | .   | . | rs7606573.              | . | . | . | .     | . |
| . ENST0000.      | 8p2. | .   | . | .                       | . | . | . | .     | . |
| . ENST0000.      | 8p2. | .   | . | Score rs7511375.        | . | . | . | .     | . |
| SLC35: ENST0000. | 8p2. | .   | . | Score=0.9 rs7626017.    | . | . | . | .     | . |
| . ENST0000.      | 8p2. | .   | . | .                       | . | . | . | .     | . |
| . ENST0000.      | 8p2. | .   | . | Score=0.9.              | . | . | . | .     | . |
| . ENST0000.      | 8p2. | .   | . | Score=0.9 rs3988723.    | . | . | . | 0.425 | . |
| . ENST0000.      | 8p2. | .   | . | Score=0.9 rs3713666.    | . | . | . | .     | . |
| . ENST0000.      | 8p2. | .   | . | rs1036449.              | . | . | . | .     | . |
| TUSC3 ENST0000.  | 8p2. | Sc. | . | .                       | . | . | . | .     | . |
| . . .            | 8p2. | .   | . | Score rs1470216 ID.     | . | . | . | .     | . |
| . . .            | 8p2. | .   | . | Score rs1394112.        | . | . | . | .     | . |
| . ENST0000.      | 8p2. | .   | . | .                       | . | . | . | .     | . |
| . ENST0000.      | 8p2. | .   | . | .                       | . | . | . | .     | . |
| . ENST0000.      | 8p2. | .   | . | .                       | . | . | . | .     | . |
| NKX2- ENST0000.  | 8p2. | .   | . | .                       | . | . | . | .     | . |
| . ENST0000.      | 8p2. | .   | . | rs7690910.              | . | . | . | .     | . |
| . ENST0000.      | 8p2. | .   | . | rs2013688.              | . | . | . | 0.001 | . |
| . ENST0000.      | 8p2. | .   | . | .                       | . | . | . | .     | . |
| EPHX2 ENST0000.  | 8p2. | .   | . | rs7247582.              | . | . | . | .     | . |
| . ENST0000.      | 8p1. | .   | . | .                       | . | . | . | .     | . |
| TEX15: ENST0000. | 8p1. | .   | . | rs1419780 ID.           | . | . | . | .     | . |
| DUSP2 ENST0000.  | 8p1. | .   | . | rs1198970.              | . | . | . | .     | . |
| . ENST0000.      | 8p1. | .   | . | rs5320288.              | . | . | . | .     | . |
| . ENST0000.      | 8p1. | .   | . | Score.                  | . | . | . | .     | . |
| . ENST0000.      | 8p1. | .   | . | Score rs7612284.        | . | . | . | .     | . |
| . ENST0000.      | 8p1. | .   | . | .                       | . | . | . | .     | . |
| TACC1 ENST0000.  | 8p1. | .   | . | rs7608102.              | . | . | . | .     | . |
| . ENST0000.      | 8p1. | .   | . | .                       | . | . | . | .     | . |
| . ENST0000.      | 8p1. | .   | . | .                       | . | . | . | .     | . |
| . ENST0000.      | 8p1. | .   | . | rs3705628.              | . | . | . | .     | . |
| . ENST0000.      | 8p1. | .   | . | rs7605197.              | . | . | . | .     | . |
| . . .            | 8p1. | .   | . | Score.                  | . | . | . | .     | . |
| . . .            | 8p1. | .   | . | Score rs3733322.        | . | . | . | .     | . |
| . . .            | 8p1. | .   | . | Score rs2003364 ID.     | . | . | . | .     | . |
| . . .            | 8p1. | .   | . | Score.                  | . | . | . | .     | . |
| . . .            | 8q1. | .   | . | Score rs4498566.        | . | . | . | .     | . |
| . . .            | 8q1. | .   | . | Score.                  | . | . | . | .     | . |
| . . .            | 8q1. | .   | . | Score rs4401873.        | . | . | . | .     | . |
| EFCAB ENST0000.  | 8q1. | .   | . | .                       | . | . | . | .     | . |
| . ENST0000.      | 8q1. | .   | . | .                       | . | . | . | .     | . |
| . ENST0000.      | 8q1. | .   | . | .                       | . | . | . | .     | . |
| . ENST0000.      | 8q1. | Sc. | . | rs1871956.              | . | . | . | .     | . |



|                  |      |     |           |                     |     |   |   |   |   |       |
|------------------|------|-----|-----------|---------------------|-----|---|---|---|---|-------|
| BNC2:↑ENST0000.  | 9p2. | Sc. | .         | .                   | .   | . | . | . | . | .     |
| CNTLNENST0000.   | 9p2. | Sc. | .         | rs7717080.          | .   | . | . | . | . | .     |
| SLC24↓ENST0000.  | 9p2. | .   | .         | .                   | .   | . | . | . | . | .     |
| UNKNC ENST0000.  | 9p2. | Sc. | .         | rs7552126 ID:       | .   | . | . | . | . | .     |
| . ENST0000.      | 9p2. | .   | .         | Score rs8986502.    | .   | . | . | . | . | .     |
| . ENST0000.      | 9p2. | .   | .         | rs7703822.          | .   | . | . | . | . | .     |
| . ENST0000.      | 9p1. | .   | .         | .                   | .   | . | . | . | . | .     |
| TESK1 ENST0000.  | 9p1. | .   | .         | .                   | ID: | . | . | . | . | .     |
| FBXO1 ENST0000.  | 9p1. | Sc. | .         | .                   | .   | . | . | . | . | .     |
| FRMPI ENST0000.  | 9p1. | .   | .         | .                   | ID: | . | . | . | . | .     |
| . ENST0000.      | 9p1. | .   | Score=0.9 | rs1616872 ID:       | .   | . | . | . | . | .     |
| CNTNA ENST0000.  | 9p1. | .   | Score=0.9 | Score rs7820531 ID: | .   | . | . | . | . | .     |
| . . .            | 9p1. | .   | Score=0.9 | Score rs6255281     | .   | . | . | . | . | .     |
| . ENST0000.      | 9q1. | .   | Score=0.9 | .                   | .   | . | . | . | . | .     |
| . ENST0000.      | 9q1. | .   | Score=0.9 | rs2003121 ID:       | .   | . | . | . | . | .     |
| . . .            | 9q1. | .   | Score=0.9 | Score rs2016275.    | .   | . | . | . | . | .     |
| . . .            | 9q1. | .   | Score=0.9 | rs2013763.          | .   | . | . | . | . | .     |
| . ENST0000.      | 9q1. | .   | Score=0.9 | rs3764322 ID:       | .   | . | . | . | . | .     |
| . ENST0000.      | 9q1. | .   | Score=0.9 | .                   | .   | . | . | . | . | .     |
| FOXD4 ENST0000.  | 9q2. | .   | Score=0.9 | .                   | .   | . | . | . | . | .     |
| FOXD4 ENST0000.  | 9q2. | .   | Score=0.9 | rs7506128           | .   | . | . | . | . | .     |
| . ENST0000.      | 9q2. | .   | .         | Score.              | .   | . | . | . | . | .     |
| TMEM2 ENST0000.  | 9q2. | Sc. | .         | .                   | .   | . | . | . | . | .     |
| . ENST0000.      | 9q2. | .   | .         | .                   | .   | . | . | . | . | .     |
| . ENST0000.      | 9q2. | .   | .         | rs9660777           | .   | . | . | . | . | .     |
| . ENST0000.      | 9q2. | .   | .         | rs5294239.          | .   | . | . | . | . | .     |
| . . .            | 9q2. | .   | .         | .                   | .   | . | . | . | . | .     |
| SPATA ENST0000.  | 9q2. | .   | Score=0.9 | rs5696558 ID:       | .   | . | . | . | . | .     |
| . ENST0000.      | 9q2. | .   | Score=0.9 | .                   | .   | . | . | . | . | .     |
| . ENST0000.      | 9q2. | .   | .         | rs7749802.          | .   | . | . | . | . | .     |
| . ENST0000.      | 9q2. | .   | .         | .                   | .   | . | . | . | . | .     |
| ZCCHC ENST0000.  | 9q2. | .   | .         | .                   | .   | . | . | . | . | .     |
| . ENST0000.      | 9q2. | .   | Score=0.9 | rs9367277           | .   | . | . | . | . | .     |
| . ENST0000.      | 9q2. | .   | .         | rs1447929.          | .   | . | . | . | . | .     |
| . ENST0000.      | 9q2. | .   | .         | .                   | .   | . | . | . | . | .     |
| . ENST0000.      | 9q2. | .   | .         | Score.              | .   | . | . | . | . | .     |
| WNK2: ENST0000.  | 9q2. | .   | .         | rs5352400.          | .   | . | . | . | . | .     |
| . ENST0000.      | 9q2. | .   | .         | .                   | ID: | . | . | . | . | .     |
| . ENST0000.      | 9q2. | Sc. | .         | .                   | .   | . | . | . | . | .     |
| ZNF36 ENST0000.  | 9q2. | .   | .         | .                   | .   | . | . | . | . | .     |
| . ENST0000.      | 9q2. | .   | .         | rs5750212.          | .   | . | . | . | . | .     |
| ZNF78 ENST0000.  | 9q2. | .   | .         | rs5664919 ID:       | .   | . | . | . | . | .     |
| . ENST0000.      | 9q2. | .   | .         | rs5346016           | .   | . | . | . | . | 0.001 |
| . ENST0000.      | 9q3. | .   | .         | Score rs5275568.    | .   | . | . | . | . | .     |
| . ENST0000.      | 9q3. | .   | .         | .                   | .   | . | . | . | . | .     |
| KIAA19 ENST0000. | 9q3. | Sc. | .         | rs9418280.          | .   | . | . | . | . | .     |
| KIAA19 ENST0000. | 9q3. | Sc. | .         | rs7534529.          | .   | . | . | . | . | .     |
| . ENST0000.      | 9q3. | .   | .         | Score.              | .   | . | . | . | . | .     |
| . ENST0000.      | 9q3. | .   | .         | .                   | .   | . | . | . | . | .     |
| . ENST0000.      | 9q3. | .   | .         | rs1017044.          | .   | . | . | . | . | .     |
| . ENST0000.      | 9q3. | .   | .         | .                   | .   | . | . | . | . | .     |
| . ENST0000.      | 9q3. | .   | .         | rs5296296           | .   | . | . | . | . | .     |
| . ENST0000.      | 9q3. | .   | .         | Score.              | .   | . | . | . | . | .     |
| PAPPA ENST0000.  | 9q3. | Sc. | .         | rs5393503 ID:       | .   | . | . | . | . | .     |

|                  |      |             |   |                     |         |   |   |       |
|------------------|------|-------------|---|---------------------|---------|---|---|-------|
| . ENST0000.      | 9q3. | .           | . | rs5770416.          | .       | . | . | .     |
| . ENST0000.      | 9q3. | .           | . | rs7765588.          | .       | . | . | .     |
| . ENST0000.      | 9q3. | .           | . | .                   | .       | . | . | .     |
| DAB2IF ENST0000. | 9q3. | Sc.         | . | rs7817163.          | .       | . | . | .     |
| DAB2IF ENST0000. | 9q3. | Sc.         | . | .                   | .       | . | . | .     |
| . ENST0000.      | 9q3. | .           | . | .                   | .       | . | . | .     |
| . ENST0000.      | 9q3. | .           | . | Score rs7671231.    | .       | . | . | .     |
| . ENST0000.      | 9q3. | .           | . | .                   | .       | . | . | .     |
| . ENST0000.      | 9q3. | .           | . | .                   | .       | . | . | .     |
| LRSAM ENST0000.  | 9q3. | .           | . | rs7704105.          | .       | . | . | .     |
| STXBP ENST0000.  | 9q3. | .           | . | rs7514371.          | .       | . | . | .     |
| . ENST0000.      | 9q3. | .           | . | .                   | .       | . | . | .     |
| FPGS:† ENST0000. | 9q3. | .           | . | rs7724303 ID.       | .       | . | . | .     |
| . ENST0000.      | 9q3. | .           | . | rs3755590.          | .       | . | . | .     |
| ODF2:† ENST0000. | 9q3. | Sc.         | . | rs7704197.          | .       | . | . | .     |
| SPTAN ENST0000.  | 9q3. | .           | . | rs3700623.          | Likely. | . | . | .     |
| SPTAN ENST0000.  | 9q3. | Sc.         | . | rs1020109.          | .       | . | . | .     |
| . ENST0000.      | 9q3. | .           | . | .                   | .       | . | . | .     |
| . ENST0000.      | 9q3. | .           | . | .                   | .       | . | . | .     |
| . ENST0000.      | 9q3. | .           | . | rs1200306.          | .       | . | . | .     |
| . ENST0000.      | 9q3. | .           | . | Score rs4837317 ID. | .       | . | . | .     |
| . ENST0000.      | 9q3. | .           | . | Score rs4837318 ID. | .       | . | . | .     |
| DOLPP ENST0000.  | 9q3. | .           | . | rs7690702.          | .       | . | . | .     |
| . ENST0000.      | 9q3. | .           | . | .                   | .       | . | . | .     |
| CRAT:† ENST0000. | 9q3. | Sc.         | . | .                   | ID.     | . | . | .     |
| RAPGE ENST0000.  | 9q3. | .           | . | rs9375934 ID.       | .       | . | . | .     |
| . ENST0000.      | 9q3. | .           | . | .                   | .       | . | . | .     |
| SETX:† ENST0000. | 9q3. | .           | . | .                   | .       | . | . | .     |
| . ENST0000.      | 9q3. | .           | . | rs4498679.          | .       | . | . | 0.038 |
| . ENST0000.      | 9q3. | .           | . | .                   | .       | . | . | .     |
| RALGC ENST0000.  | 9q3. | .           | . | Score.              | .       | . | . | .     |
| GBGT1 ENST0000.  | 9q3. | .           | . | .                   | .       | . | . | .     |
| . ENST0000.      | 9q3. | .           | . | .                   | .       | . | . | .     |
| STKLD ENST0000.  | 9q3. | .           | . | rs7823594 ID.       | .       | . | . | .     |
| TMEM‡ ENST0000.  | 9q3. | .           | . | rs7806069.          | .       | . | . | .     |
| DBH:NI ENST0000. | 9q3. | .           | . | .                   | .       | . | . | .     |
| COL5A ENST0000.  | 9q3. | .           | . | .                   | .       | . | . | .     |
| COL5A ENST0000.  | 9q3. | .           | . | rs6173790.          | Benig.  | . | . | .     |
| . ENST0000.      | 9q3. | .           | . | .                   | .       | . | . | .     |
| CAMS/ ENST0000.  | 9q3. | .           | . | rs7478355.          | .       | . | . | .     |
| . ENST0000.      | 9q3. | .           | . | .                   | .       | . | . | .     |
| . ENST0000.      | 9q3. | .           | . | rs9942197 ID.       | .       | . | . | .     |
| NOTCH ENST0000.  | 9q3. | .           | . | .                   | .       | . | . | .     |
| . ENST0000.      | 9q3. | .           | . | .                   | .       | . | . | .     |
| FAM69 ENST0000.  | 9q3. | .           | . | .                   | .       | . | . | .     |
| . ENST0000.      | 9q3. | .           | . | Score.              | .       | . | . | .     |
| TRAF2 ENST0000.  | 9q3. | .           | . | rs1399152.          | .       | . | . | .     |
| . ENST0000.      | 9q3. | .           | . | rs5651517.          | .       | . | . | .     |
| . ENST0000.      | 9q3. | .           | . | rs7788028.          | .       | . | . | .     |
| FAM16 ENST0000.  | 9q3. | .           | . | .                   | .       | . | . | .     |
| TOR4A ENST0000.  | 9q3. | .           | . | rs7776402 ID.       | .       | . | . | .     |
| . ENST0000.      | 9q3. | .           | . | rs1126228.          | .       | . | . | 0.001 |
| . ENST0000.      | 9q3. | .           | . | .                   | .       | . | . | .     |
| . ENST0000.      | 9q3. | Score=0.9†. | . | rs3707879.          | .       | . | . | .     |

|         |           |      |    |           |                      |   |   |   |       |
|---------|-----------|------|----|-----------|----------------------|---|---|---|-------|
| .       | ENST0000. | 10p. | .  | .         | rs7547454.           | . | . | . | .     |
| .       | ENST0000. | 10p. | .  | .         | Score.               | . | . | . | .     |
| .       | ENST0000. | 10p. | .  | .         | rs5680149.           | . | . | . | 0.001 |
| .       | ENST0000. | 10p. | .  | .         | Score.               | . | . | . | .     |
| SFMBT   | ENST0000. | 10p. | .  | .         | rs2019140 ID.        | . | . | . | .     |
| .       | ENST0000. | 10p. | .  | .         | Score rs7961144.     | . | . | . | .     |
| ITIH5:1 | ENST0000. | 10p. | .  | .         | rs3708927 ID.        | . | . | . | .     |
| .       | ENST0000. | 10p. | .  | .         | .                    | . | . | . | .     |
| .       | ENST0000. | 10p. | .  | .         | .                    | . | . | . | .     |
| .       | .         | 10p. | .  | .         | Score.               | . | . | . | .     |
| .       | .         | 10p. | .  | .         | .                    | . | . | . | .     |
| .       | ENST0000. | 10p. | .  | Score=0.9 | Score rs1919845.     | . | . | . | .     |
| .       | ENST0000. | 10p. | .  | .         | rs7658069 ID.        | . | . | . | 0.03  |
| CUBN:1  | ENST0000. | 10p. | .  | .         | .                    | . | . | . | .     |
| .       | ENST0000. | 10p. | .  | .         | .                    | . | . | . | .     |
| .       | ENST0000. | 10p. | .  | .         | rs9652901.           | . | . | . | .     |
| KIAA12  | ENST0000. | 10p. | .  | .         | .                    | . | . | . | .     |
| ARHG7   | ENST0000. | 10p. | Sc | Score=0.9 | rs7647799.           | . | . | . | .     |
| .       | ENST0000. | 10p. | .  | .         | rs1999030.           | . | . | . | .     |
| MYO3A   | ENST0000. | 10p. | .  | .         | .                    | . | . | . | .     |
| .       | ENST0000. | 10p. | .  | .         | ID.                  | . | . | . | .     |
| ANKRD   | ENST0000. | 10p. | .  | .         | rs3678495 ID: Uncer. | . | . | . | .     |
| .       | ENST0000. | 10p. | .  | .         | .                    | . | . | . | .     |
| .       | ENST0000. | 10p. | .  | Score=0.9 | ID.                  | . | . | . | .     |
| .       | ENST0000. | 10p. | .  | Score=0.9 | rs7766630.           | . | . | . | .     |
| .       | ENST0000. | 10p. | .  | Score=0.9 | rs5733337.           | . | . | . | .     |
| CCNY:1  | ENST0000. | 10p. | Sc | .         | ID.                  | . | . | . | .     |
| .       | .         | 10q. | .  | Score=0.9 | .                    | . | . | . | .     |
| .       | ENST0000. | 10q. | .  | Score=0.9 | ID.                  | . | . | . | .     |
| .       | ENST0000. | 10q. | .  | Score=0.9 | .                    | . | . | . | .     |
| .       | ENST0000. | 10q. | .  | Score=0.9 | .                    | . | . | . | .     |
| .       | ENST0000. | 10q. | .  | .         | .                    | . | . | . | .     |
| WDFY2   | ENST0000. | 10q. | .  | .         | rs9040575 ID.        | . | . | . | .     |
| CHAT:1  | ENST0000. | 10q. | .  | .         | rs3745238.           | . | . | . | .     |
| .       | ENST0000. | 10q. | .  | Score=0.9 | .                    | . | . | . | .     |
| .       | ENST0000. | 10q. | .  | .         | rs7512474.           | . | . | . | .     |
| .       | .         | 10q. | .  | .         | Score.               | . | . | . | .     |
| FAM13   | ENST0000. | 10q. | .  | .         | rs1389134 ID.        | . | . | . | .     |
| .       | ENST0000. | 10q. | .  | .         | rs5737945.           | . | . | . | .     |
| .       | ENST0000. | 10q. | .  | .         | Score.               | . | . | . | .     |
| .       | ENST0000. | 10q. | .  | .         | .                    | . | . | . | .     |
| COL13   | ENST0000. | 10q. | .  | .         | rs7548920 ID.        | . | . | . | .     |
| AIFM2:  | ENST0000. | 10q. | Sc | .         | .                    | . | . | . | .     |
| .       | ENST0000. | 10q. | .  | .         | rs3744653.           | . | . | . | .     |
| CDH23   | ENST0000. | 10q. | Sc | .         | rs2017279 ID: Likely | . | . | . | .     |
| P4HA1   | ENST0000. | 10q. | Sc | .         | .                    | . | . | . | .     |
| .       | ENST0000. | 10q. | .  | .         | .                    | . | . | . | .     |
| .       | ENST0000. | 10q. | .  | .         | rs7759506.           | . | . | . | .     |
| .       | ENST0000. | 10q. | .  | Score=0.9 | rs7802380 ID.        | . | . | . | .     |
| .       | ENST0000. | 10q. | .  | Score=0.9 | Score rs8789174.     | . | . | . | .     |
| .       | ENST0000. | 10q. | .  | Score=0.9 | .                    | . | . | . | .     |
| .       | ENST0000. | 10q. | .  | .         | .                    | . | . | . | .     |
| .       | ENST0000. | 10q. | .  | .         | .                    | . | . | . | .     |



|        |           |      |     |           |           |   |       |
|--------|-----------|------|-----|-----------|-----------|---|-------|
| SH2D4  | ENST0000. | 10q. | Sc. | rs5681324 |           |   | 0.001 |
| .      | ENST0000. | 10q. | .   | .         | .         | . | .     |
| LRIT1: | ENST0000. | 10q. | .   | .         | .         | . | .     |
| .      | ENST0000. | 10q. | .   | .         | .         | . | .     |
| .      | .         | 10q. | .   | Score     | rs5296587 | . | .     |
| .      | ENST0000. | 10q. | .   | .         | .         | . | .     |
| MYOF:  | ENST0000. | 10q. | .   | rs3696055 | .         | . | .     |
| CEP55  | ENST0000. | 10q. | .   | rs7535868 | .         | . | .     |
| .      | ENST0000. | 10q. | .   | .         | .         | . | .     |
| .      | ENST0000. | 10q. | .   | Score     | rs9047130 | . | .     |
| BLNK:  | ENST0000. | 10q. | .   | rs7826084 | .         | . | .     |
| .      | ENST0000. | 10q. | .   | .         | .         | . | .     |
| .      | ENST0000. | 10q. | .   | Score     | rs3769880 | . | .     |
| .      | ENST0000. | 10q. | .   | rs9945308 | .         | . | .     |
| HPSE2  | ENST0000. | 10q. | .   | rs5392081 | ID:       | . | .     |
| CUTC:  | ENST0000. | 10q. | Sc. | rs3692674 | .         | . | .     |
| .      | ENST0000. | 10q. | .   | rs9441434 | .         | . | .     |
| PPRC1  | ENST0000. | 10q. | .   | .         | .         | . | .     |
| .      | ENST0000. | 10q. | .   | .         | .         | . | .     |
| .      | ENST0000. | 10q. | .   | .         | .         | . | .     |
| .      | ENST0000. | 10q. | .   | .         | .         | . | .     |
| .      | ENST0000. | 10q. | .   | .         | .         | . | .     |
| .      | ENST0000. | 10q. | .   | .         | .         | . | .     |
| .      | ENST0000. | 10q. | .   | Score     | .         | . | .     |
| PDZD8  | ENST0000. | 10q. | .   | .         | .         | . | .     |
| .      | ENST0000. | 10q. | .   | Score     | .         | . | .     |
| .      | ENST0000. | 10q. | .   | .         | .         | . | .     |
| FAM17  | ENST0000. | 10q. | .   | rs7503782 | ID:       | . | .     |
| UNKN   | ENST0000. | 10q. | .   | .         | .         | . | .     |
| .      | ENST0000. | 10q. | .   | rs3765225 | .         | . | .     |
| FOXI2: | ENST0000. | 10q. | .   | .         | ID:       | . | .     |
| .      | ENST0000. | 10q. | .   | rs5455183 | .         | . | .     |
| NKX6-2 | ENST0000. | 10q. | .   | .         | .         | . | .     |
| .      | ENST0000. | 10q. | .   | .         | .         | . | .     |
| .      | ENST0000. | 10q. | .   | rs5396027 | .         | . | .     |
| PRAP1  | ENST0000. | 10q. | Sc. | .         | .         | . | .     |
| PAOX:  | ENST0000. | 10q. | Sc. | .         | .         | . | .     |
| .      | ENST0000. | 10q. | .   | rs7793478 | ID:       | . | .     |
| .      | ENST0000. | 10q. | .   | .         | .         | . | .     |
| .      | ENST0000. | 10q. | .   | .         | .         | . | .     |
| .      | ENST0000. | 11p. | .   | Score=0.9 | .         | . | .     |
| .      | ENST0000. | 11p. | .   | rs2003509 | ID:       | . | .     |
| .      | ENST0000. | 11p. | .   | .         | .         | . | .     |
| .      | ENST0000. | 11p. | .   | rs1008718 | .         | . | .     |
| .      | ENST0000. | 11p. | .   | rs7793525 | .         | . | .     |
| LMNT   | ENST0000. | 11p. | Sc. | rs3741463 | .         | . | .     |
| PHRF1  | ENST0000. | 11p. | .   | .         | .         | . | .     |
| .      | ENST0000. | 11p. | .   | .         | .         | . | .     |
| .      | ENST0000. | 11p. | .   | rs8960121 | .         | . | .     |
| .      | ENST0000. | 11p. | .   | rs7582346 | .         | . | .     |
| .      | ENST0000. | 11p. | .   | rs7514641 | .         | . | .     |
| .      | ENST0000. | 11p. | .   | .         | .         | . | .     |
| MUC5E  | ENST0000. | 11p. | .   | .         | ID:       | . | .     |
| MUC5E  | ENST0000. | 11p. | Sc. | .         | ID:       | . | .     |

|        |          |      |    |           |                     |               |       |
|--------|----------|------|----|-----------|---------------------|---------------|-------|
| MUC5E  | ENST0000 | 11p. | .  | .         | rs3689865 ID: Uncer | .             | .     |
| .      | ENST0000 | 11p. | .  | .         | .                   | .             | .     |
| .      | .        | 11p. | .  | .         | rs1019902           | .             | .     |
| .      | ENST0000 | 11p. | .  | .         | Score rs7724812     | .             | .     |
| .      | ENST0000 | 11p. | .  | .         | .                   | .             | .     |
| .      | ENST0000 | 11p. | .  | .         | .                   | .             | .     |
| .      | .        | 11p. | .  | .         | Score=0.9           | rs5592355 ID: | 0.115 |
| OR52B  | ENST0000 | 11p. | .  | .         | .                   | .             | .     |
| .      | ENST0000 | 11p. | .  | .         | ID:                 | .             | .     |
| .      | ENST0000 | 11p. | .  | .         | Score rs8669468 ID: | .             | .     |
| .      | ENST0000 | 11p. | .  | .         | .                   | .             | .     |
| .      | ENST0000 | 11p. | .  | .         | rs7289628           | .             | 0.001 |
| DCHS1  | ENST0000 | 11p. | .  | .         | .                   | .             | .     |
| DCHS1  | ENST0000 | 11p. | .  | .         | .                   | .             | .     |
| MICAL  | ENST0000 | 11p. | .  | .         | rs7595225           | .             | .     |
| UNKNC  | ENST0000 | 11p. | Sc | .         | rs7811107           | .             | .     |
| UNKNC  | ENST0000 | 11p. | .  | .         | ID:                 | .             | .     |
| RRAS2  | ENST0000 | 11p. | .  | .         | rs7824579 ID:       | .             | .     |
| PDE3B  | ENST0000 | 11p. | Sc | .         | .                   | .             | .     |
| .      | ENST0000 | 11p. | .  | .         | .                   | .             | .     |
| .      | ENST0000 | 11p. | .  | .         | Score:              | .             | .     |
| PLEKH  | ENST0000 | 11p. | .  | .         | rs7785451           | .             | .     |
| OTOG:  | ENST0000 | 11p. | Sc | .         | .                   | .             | .     |
| TPH1:  | ENST0000 | 11p. | Sc | .         | .                   | .             | .     |
| .      | ENST0000 | 11p. | .  | .         | .                   | .             | .     |
| .      | ENST0000 | 11p. | .  | .         | Score=0.9           | .             | .     |
| .      | ENST0000 | 11p. | .  | .         | .                   | .             | .     |
| .      | ENST0000 | 11p. | .  | .         | .                   | .             | .     |
| NELL1: | ENST0000 | 11p. | Sc | .         | rs1146385           | .             | .     |
| GAS2:  | ENST0000 | 11p. | .  | .         | .                   | .             | .     |
| .      | ENST0000 | 11p. | .  | .         | Score=0.9           | .             | .     |
| .      | ENST0000 | 11p. | .  | .         | .                   | .             | .     |
| .      | ENST0000 | 11p. | .  | .         | .                   | .             | .     |
| HSD17  | ENST0000 | 11p. | .  | .         | Score=0.9           | .             | .     |
| ZNF40  | ENST0000 | 11p. | Sc | .         | .                   | .             | .     |
| CKAP5  | ENST0000 | 11p. | Sc | .         | .                   | .             | .     |
| .      | ENST0000 | 11p. | .  | .         | Score rs7731977     | .             | .     |
| OR4A1  | ENST0000 | 11q. | Sc | Score=0.9 | ID:                 | .             | .     |
| .      | ENST0000 | 11q. | .  | .         | rs7783566           | .             | .     |
| SMTNL  | ENST0000 | 11q. | .  | .         | .                   | .             | .     |
| OR1S1  | ENST0000 | 11q. | .  | .         | Score=0.8           | rs7556226     | .     |
| OR10G  | ENST0000 | 11q. | .  | .         | rs3705153           | .             | .     |
| .      | ENST0000 | 11q. | .  | .         | rs7461600           | .             | .     |
| PPP1R  | ENST0000 | 11q. | .  | .         | rs7613895           | .             | .     |
| .      | ENST0000 | 11q. | .  | .         | .                   | .             | .     |
| FADS1  | ENST0000 | 11q. | .  | .         | .                   | .             | .     |
| AHNAK  | ENST0000 | 11q. | .  | .         | rs7506613           | .             | .     |
| MTA2:  | ENST0000 | 11q. | .  | .         | rs3688014           | .             | .     |
| INTS5: | ENST0000 | 11q. | .  | .         | rs3734262           | .             | .     |
| .      | ENST0000 | 11q. | .  | .         | .                   | .             | .     |
| NAA40  | ENST0000 | 11q. | .  | .         | rs7551956           | .             | .     |
| .      | ENST0000 | 11q. | .  | .         | rs320149 ID:        | .             | .     |
| .      | ENST0000 | 11q. | .  | .         | .                   | .             | .     |
| PYGM:  | ENST0000 | 11q. | Sc | .         | rs7694797           | .             | .     |

|         |           |      |     |                     |        |   |   |   |
|---------|-----------|------|-----|---------------------|--------|---|---|---|
| SYVN1   | ENST0000. | 11q. | Sc. | rs7599871.          | .      | . | . | . |
| .       | ENST0000. | 11q. | .   | rs2009796 ID.       | .      | . | . | . |
| .       | ENST0000. | 11q. | .   | Score.              | .      | . | . | . |
| KCNK7   | ENST0000. | 11q. | .   | .                   | .      | . | . | . |
| MAP3K   | ENST0000. | 11q. | Sc. | .                   | .      | . | . | . |
| PCNXL   | ENST0000. | 11q. | .   | rs3731576.          | .      | . | . | . |
| SIPA1:↓ | ENST0000. | 11q. | .   | .                   | .      | . | . | . |
| .       | ENST0000. | 11q. | .   | .                   | .      | . | . | . |
| .       | ENST0000. | 11q. | .   | .                   | .      | . | . | . |
| GAL3S   | ENST0000. | 11q. | Sc. | .                   | .      | . | . | . |
| .       | ENST0000. | 11q. | .   | .                   | .      | . | . | . |
| CD248:  | ENST0000. | 11q. | .   | .                   | .      | . | . | . |
| BRMS1   | ENST0000. | 11q. | Sc. | .                   | .      | . | . | . |
| .       | ENST0000. | 11q. | .   | .                   | .      | . | . | . |
| .       | ENST0000. | 11q. | .   | rs8917540.          | .      | . | . | . |
| TCIRG   | ENST0000. | 11q. | .   | rs1432324.          | .      | . | . | . |
| TPCN2   | ENST0000. | 11q. | .   | rs7621382.          | .      | . | . | . |
| .       | ENST0000. | 11q. | .   | .                   | .      | . | . | . |
| .       | ENST0000. | 11q. | .   | .                   | .      | . | . | . |
| DHCR7   | ENST0000. | 11q. | Sc. | rs7726393 ID.       | .      | . | . | . |
| .       | ENST0000. | 11q. | .   | Score rs1917587.    | Uncer. | . | . | . |
| .       | ENST0000. | 11q. | .   | .                   | .      | . | . | . |
| .       | ENST0000. | 11q. | .   | .                   | .      | . | . | . |
| .       | ENST0000. | 11q. | .   | Score.              | .      | . | . | . |
| .       | ENST0000. | 11q. | .   | .                   | .      | . | . | . |
| .       | ENST0000. | 11q. | .   | .                   | .      | . | . | . |
| .       | ENST0000. | 11q. | Sc. | .                   | .      | . | . | . |
| .       | ENST0000. | 11q. | .   | .                   | .      | . | . | . |
| SLCO2   | ENST0000. | 11q. | .   | rs7806415.          | .      | . | . | . |
| MAP6:↑  | ENST0000. | 11q. | Sc. | rs7805688.          | .      | . | . | . |
| .       | ENST0000. | 11q. | .   | rs7453149.          | .      | . | . | . |
| .       | ENST0000. | 11q. | .   | .                   | .      | . | . | . |
| .       | ENST0000. | 11q. | .   | Score rs3722049.    | .      | . | . | . |
| .       | ENST0000. | 11q. | .   | Score=0.9.          | .      | . | . | . |
| GRM5:   | ENST0000. | 11q. | Sc. | .                   | ID.    | . | . | . |
| .       | ENST0000. | 11q. | .   | Score=0.9.          | .      | . | . | . |
| .       | ENST0000. | 11q. | .   | rs7912478.          | .      | . | . | . |
| DYNC2   | ENST0000. | 11q. | .   | rs1913813.          | Uncer. | . | . | . |
| .       | ENST0000. | 11q. | .   | rs7548668.          | .      | . | . | . |
| ELMOI   | ENST0000. | 11q. | Sc. | rs7639430.          | .      | . | . | . |
| .       | ENST0000. | 11q. | .   | .                   | .      | . | . | . |
| ACAT1   | ENST0000. | 11q. | .   | .                   | .      | . | . | . |
| .       | ENST0000. | 11q. | .   | .                   | .      | . | . | . |
| .       | ENST0000. | 11q. | .   | rs5746434.          | .      | . | . | . |
| .       | ENST0000. | 11q. | Sc. | rs1042921.          | .      | . | . | . |
| .       | ENST0000. | 11q. | .   | rs9738553.          | .      | . | . | . |
| ZW10:↑  | ENST0000. | 11q. | .   | rs7711773.          | .      | . | . | . |
| .       | ENST0000. | 11q. | .   | Score rs7553780 ID. | .      | . | . | . |
| SIK3:N↓ | ENST0000. | 11q. | .   | .                   | .      | . | . | . |
| TMPR5   | ENST0000. | 11q. | .   | rs3706451.          | .      | . | . | . |
| SCN2B   | ENST0000. | 11q. | .   | .                   | .      | . | . | . |
| .       | ENST0000. | 11q. | .   | .                   | .      | . | . | . |
| .       | ENST0000. | 11q. | .   | .                   | .      | . | . | . |
| DDX6:↑  | ENST0000. | 11q. | Sc. | .                   | .      | . | . | . |

|                 |      |    |           |                      |   |   |   |       |
|-----------------|------|----|-----------|----------------------|---|---|---|-------|
| ARHGE1ENST0000  | 11q. | .  | .         | rs5761141            | . | . | . | .     |
| ARHGE2ENST0000  | 11q. | .  | .         | .                    | . | . | . | .     |
| TECTA1ENST0000  | 11q. | .  | .         | rs1424863 ID: other; | . | . | . | 0.001 |
| OR10G1ENST0000  | 11q. | Sc | .         | rs1464053            | . | . | . | .     |
| UNKNCEENST0000  | 11q. | .  | .         | rs1866274 ID:        | . | . | . | 0.008 |
| ENST0000        | 11q. | .  | .         | .                    | . | . | . | .     |
| PKNOX1ENST0000  | 11q. | .  | .         | .                    | . | . | . | .     |
| FOXRE1ENST0000  | 11q. | .  | .         | rs1036245            | . | . | . | .     |
| ENST0000        | 11q. | .  | .         | Score rs1499597      | . | . | . | .     |
| PRDM1ENST0000   | 11q. | .  | .         | rs1160026            | . | . | . | .     |
| ADAM1ENST0000   | 11q. | Sc | .         | rs7501981            | . | . | . | .     |
| OPCMI1ENST0000  | 11q. | .  | .         | .                    | . | . | . | .     |
| ENST0000        | 11q. | .  | .         | Score rs9612999      | . | . | . | .     |
| ENST0000        | 11q. | .  | .         | .                    | . | . | . | .     |
| ENST0000        | 12p. | .  | .         | rs1492134            | . | . | . | .     |
| ENST0000        | 12p. | .  | .         | Score                | . | . | . | .     |
| B4GAL1ENST0000  | 12p. | .  | .         | rs7477402            | . | . | . | .     |
| ENST0000        | 12p. | .  | .         | .                    | . | . | . | .     |
| CACNA1ENST0000  | 12p. | Sc | .         | ID:                  | . | . | . | .     |
| CACNA2ENST0000  | 12p. | .  | .         | rs2020589 Likely     | . | . | . | 0.001 |
| ENST0000        | 12p. | .  | .         | rs1044570            | . | . | . | .     |
| ENST0000        | 12p. | .  | .         | .                    | . | . | . | .     |
| ENST0000        | 12p. | .  | .         | .                    | . | . | . | .     |
| ENST0000        | 12p. | .  | .         | .                    | . | . | . | .     |
| KCNA61ENST0000  | 12p. | .  | .         | .                    | . | . | . | .     |
| TNFRS1ENST0000  | 12p. | .  | .         | Score                | . | . | . | .     |
| ENST0000        | 12p. | .  | .         | rs7522876            | . | . | . | .     |
| ENST0000        | 12p. | .  | .         | .                    | . | . | . | .     |
| ENST0000        | 12p. | .  | .         | .                    | . | . | . | .     |
| ENST0000        | 12p. | .  | .         | .                    | . | . | . | .     |
| CLEC61ENST0000  | 12p. | .  | .         | .                    | . | . | . | .     |
| UNKNCE1ENST0000 | 12p. | .  | .         | .                    | . | . | . | .     |
| ENST0000        | 12p. | .  | Score=0.9 | .                    | . | . | . | .     |
| ENST0000        | 12p. | .  | Score=0.9 | rs7607645 ID:        | . | . | . | .     |
| ENST0000        | 12p. | .  | .         | .                    | . | . | . | .     |
| ENST0000        | 12p. | .  | Score=0.9 | .                    | . | . | . | .     |
| ENST0000        | 12p. | .  | .         | .                    | . | . | . | .     |
| UNKNCE1ENST0000 | 12p. | Sc | .         | rs7520863            | . | . | . | .     |
| UNKNCE2ENST0000 | 12p. | .  | .         | ID:                  | . | . | . | .     |
| ENST0000        | 12p. | .  | .         | rs7558438            | . | . | . | .     |
| PIK3C21ENST0000 | 12p. | .  | .         | .                    | . | . | . | .     |
| PIK3C22ENST0000 | 12p. | .  | .         | .                    | . | . | . | .     |
| ENST0000        | 12p. | .  | .         | rs9411424            | . | . | . | .     |
| SLCO11ENST0000  | 12p. | .  | .         | .                    | . | . | . | .     |
| PPFIBF1ENST0000 | 12p. | .  | .         | .                    | . | . | . | .     |
| ENST0000        | 12p. | .  | .         | .                    | . | . | . | .     |
| ENST0000        | 12p. | .  | .         | rs3715564            | . | . | . | .     |
| ENST0000        | 12p. | .  | .         | .                    | . | . | . | .     |
| ENST0000        | 12p. | .  | Score=0.9 | .                    | . | . | . | .     |
| ENST0000        | 12q. | .  | Score=0.9 | .                    | . | . | . | .     |
| ENST0000        | 12q. | .  | .         | .                    | . | . | . | .     |
| ENST0000        | 12q. | .  | .         | .                    | . | . | . | .     |
| ENST0000        | 12q. | .  | .         | .                    | . | . | . | .     |
| C12orf1ENST0000 | 12q. | .  | .         | .                    | . | . | . | .     |



|                  |      |     |     |                     |     |     |     |       |
|------------------|------|-----|-----|---------------------|-----|-----|-----|-------|
| . ENST0000.      | 12q. | . . | . . | . .                 | . . | . . | . . | . .   |
| . ENST0000.      | 12q. | . . | . . | . .                 | . . | . . | . . | . .   |
| HECTD ENST0000.  | 12q. | Sc. | . . | rs3699442           | . . | . . | . . | . .   |
| . ENST0000.      | 12q. | . . | . . | rs7648934           | . . | . . | . . | . .   |
| . ENST0000.      | 12q. | . . | . . | . .                 | . . | . . | . . | . .   |
| . ENST0000.      | 12q. | . . | . . | . .                 | . . | . . | . . | . .   |
| . ENST0000.      | 12q. | . . | . . | . .                 | . . | . . | . . | . .   |
| . ENST0000.      | 12q. | Sc. | . . | rs9094398           | . . | . . | . . | . .   |
| . ENST0000.      | 12q. | . . | . . | rs7629138           | . . | . . | . . | . .   |
| OASL: ENST0000.  | 12q. | . . | . . | . .                 | . . | . . | . . | . .   |
| . ENST0000.      | 12q. | . . | . . | Score rs1000013 ID: | . . | . . | . . | . .   |
| . ENST0000.      | 12q. | . . | . . | . .                 | . . | . . | . . | . .   |
| . ENST0000.      | 12q. | . . | . . | . .                 | . . | . . | . . | . .   |
| . ENST0000.      | 12q. | . . | . . | Score.              | . . | . . | . . | . .   |
| . ENST0000.      | 12q. | . . | . . | rs5485859           | . . | . . | . . | . .   |
| . ENST0000.      | 12q. | . . | . . | . .                 | . . | . . | . . | . .   |
| . ENST0000.      | 12q. | . . | . . | Score.              | . . | . . | . . | . .   |
| . ENST0000.      | 12q. | Sc. | . . | . .                 | . . | . . | . . | . .   |
| . ENST0000.      | 12q. | . . | . . | rs3682772           | . . | . . | . . | . .   |
| DNAH1 ENST0000.  | 12q. | . . | . . | . .                 | . . | . . | . . | . .   |
| . ENST0000.      | 12q. | . . | . . | rs1861196           | . . | . . | . . | 0.005 |
| . ENST0000.      | 12q. | . . | . . | . .                 | . . | . . | . . | . .   |
| . .              | 12q. | . . | . . | Score.              | . . | . . | . . | . .   |
| TMEM1 ENST0000.  | 12q. | . . | . . | rs7758291 ID:       | . . | . . | . . | . .   |
| . ENST0000.      | 12q. | . . | . . | rs8685914           | . . | . . | . . | . .   |
| . ENST0000.      | 12q. | . . | . . | . .                 | . . | . . | . . | . .   |
| . ENST0000.      | 12q. | . . | . . | . .                 | . . | . . | . . | . .   |
| . ENST0000.      | 12q. | . . | . . | . .                 | . . | . . | . . | . .   |
| CHFR: ENST0000.  | 12q. | Sc. | . . | . .                 | . . | . . | . . | . .   |
| PSPC1 ENST0000.  | 13q. | . . | . . | . .                 | . . | . . | . . | . .   |
| ZMYM2 ENST0000.  | 13q. | . . | . . | . .                 | . . | . . | . . | . .   |
| ZDHC ENST0000.   | 13q. | . . | . . | rs7650516 ID:       | . . | . . | . . | . .   |
| SGCG: ENST0000.  | 13q. | . . | . . | . .                 | . . | . . | . . | . .   |
| . ENST0000.      | 13q. | . . | . . | rs7609687           | . . | . . | . . | . .   |
| . .              | 13q. | . . | . . | . .                 | . . | . . | . . | . .   |
| FRY: N ENST0000. | 13q. | . . | . . | . .                 | . . | . . | . . | . .   |
| . ENST0000.      | 13q. | . . | . . | . .                 | . . | . . | . . | . .   |
| . ENST0000.      | 13q. | Sc. | . . | . .                 | . . | . . | . . | . .   |
| CCDC1 ENST0000.  | 13q. | . . | . . | . .                 | . . | . . | . . | . .   |
| SMAD9 ENST0000.  | 13q. | Sc. | . . | . .                 | . . | . . | . . | . .   |
| MTRF1 ENST0000.  | 13q. | . . | . . | rs1133145           | . . | . . | . . | . .   |
| . .              | 13q. | . . | . . | Score rs9269682     | . . | . . | . . | . .   |
| . ENST0000.      | 13q. | . . | . . | . .                 | . . | . . | . . | . .   |
| . ENST0000.      | 13q. | . . | . . | rs5302300           | . . | . . | . . | 0.003 |
| . ENST0000.      | 13q. | . . | . . | rs7755432           | . . | . . | . . | . .   |
| . .              | 13q. | . . | . . | Score rs5354767     | . . | . . | . . | . .   |
| . ENST0000.      | 13q. | . . | . . | . .                 | . . | . . | . . | . .   |
| . ENST0000.      | 13q. | . . | . . | . .                 | . . | . . | . . | . .   |
| . ENST0000.      | 13q. | . . | . . | rs5371791           | . . | . . | . . | . .   |
| . ENST0000.      | 13q. | . . | . . | . .                 | . . | . . | . . | . .   |
| MBNL2 ENST0000.  | 13q. | Sc. | . . | rs1492005           | . . | . . | . . | . .   |
| TM9SF ENST0000.  | 13q. | . . | . . | rs3733851           | . . | . . | . . | . .   |
| . ENST0000.      | 13q. | . . | . . | rs3731740           | . . | . . | . . | . .   |
| ABHD1 ENST0000.  | 13q. | . . | . . | . .                 | . . | . . | . . | . .   |

|       |          |      |           |           |    |  |       |
|-------|----------|------|-----------|-----------|----|--|-------|
| MYO16 | ENST0000 | 13q. | Sc.       | rs7567578 |    |  |       |
| COL4A | ENST0000 | 13q. |           | rs1488011 | ID |  |       |
| CARS2 | ENST0000 | 13q. |           | rs7563035 |    |  |       |
|       | ENST0000 | 13q. |           |           |    |  |       |
|       | ENST0000 | 13q. |           | rs1000744 |    |  |       |
|       | ENST0000 | 13q. |           | rs7522048 | ID |  |       |
| MCF2L | ENST0000 | 13q. |           | rs7502995 |    |  |       |
| GAS6  | ENST0000 | 13q. |           | rs7709821 |    |  |       |
|       | ENST0000 | 14q. | Score=0.9 | rs8791117 |    |  |       |
|       | ENST0000 | 14q. | Score=0.9 |           |    |  |       |
|       | ENST0000 | 14q. | Score=0.9 | rs7445485 |    |  |       |
|       | ENST0000 | 14q. |           |           |    |  |       |
| TEP1  | ENST0000 | 14q. |           | rs1453568 |    |  |       |
| KLHL3 | ENST0000 | 14q. |           | rs5497679 |    |  |       |
|       | ENST0000 | 14q. |           |           |    |  |       |
|       | ENST0000 | 14q. |           | rs3745810 |    |  |       |
| HAUS4 | ENST0000 | 14q. |           | rs7576169 | ID |  |       |
|       | ENST0000 | 14q. |           |           |    |  |       |
|       | ENST0000 | 14q. |           | rs7777607 |    |  |       |
|       | ENST0000 | 14q. | Score     | rs9241538 |    |  |       |
|       | ENST0000 | 14q. |           |           |    |  |       |
| RALGA | ENST0000 | 14q. |           |           |    |  |       |
|       | ENST0000 | 14q. |           |           |    |  |       |
|       | ENST0000 | 14q. | Score=0.9 | rs5673369 |    |  |       |
|       | ENST0000 | 14q. |           |           |    |  |       |
| LRFN5 | ENST0000 | 14q. |           | rs8659367 | ID |  |       |
|       | ENST0000 | 14q. |           |           |    |  |       |
|       | ENST0000 | 14q. |           |           |    |  |       |
|       | ENST0000 | 14q. |           |           |    |  |       |
| PTGER | ENST0000 | 14q. | Sc.       | rs7462395 |    |  |       |
|       | ENST0000 | 14q. |           |           |    |  |       |
|       | ENST0000 | 14q. |           |           |    |  |       |
| DAAM1 | ENST0000 | 14q. |           |           |    |  |       |
|       | ENST0000 | 14q. |           |           |    |  |       |
| DHRS7 | ENST0000 | 14q. |           | rs1401803 |    |  |       |
|       | ENST0000 | 14q. |           |           |    |  |       |
| MTHFC | ENST0000 | 14q. |           | rs5401543 |    |  |       |
|       | ENST0000 | 14q. | Score     | rs1404421 |    |  | 0.001 |
|       | ENST0000 | 14q. |           |           |    |  |       |
|       | ENST0000 | 14q. |           |           |    |  |       |
| ZNF41 | ENST0000 | 14q. | Sc.       | rs7545827 |    |  |       |
|       | ENST0000 | 14q. |           | rs3764591 |    |  |       |
| LTBP2 | ENST0000 | 14q. | Sc.       |           |    |  |       |
|       | ENST0000 | 14q. |           |           |    |  |       |
|       | ENST0000 | 14q. | Score     |           |    |  |       |
| RPS6K | ENST0000 | 14q. |           | rs1413435 |    |  |       |
|       | ENST0000 | 14q. |           |           |    |  |       |
|       | ENST0000 | 14q. |           |           |    |  |       |
| TTC7B | ENST0000 | 14q. |           | rs7511076 |    |  |       |
|       | ENST0000 | 14q. |           | rs7632995 |    |  |       |
|       | ENST0000 | 14q. |           |           |    |  |       |
|       | ENST0000 | 14q. |           |           |    |  |       |

|        |                    |      |     |   |                               |   |   |   |   |   |   |
|--------|--------------------|------|-----|---|-------------------------------|---|---|---|---|---|---|
| .      | ENST0000.          | 14q. | .   | . | Score.                        | . | . | . | . | . | . |
| .      | ENST0000.          | 14q. | .   | . | .                             | . | . | . | . | . | . |
| BCL11I | ENST0000.          | 14q. | .   | . | .                             | . | . | . | . | . | . |
| BCL11I | ENST0000.          | 14q. | Sc. | . | .                             | . | . | . | . | . | . |
| DLK1:1 | ENST0000.          | 14q. | .   | . | .                             | . | . | . | . | . | . |
| .      | ENST0000hsa-mir-41 | 14q. | Sc. | . | .                             | . | . | . | . | . | . |
| .      | ENST0000.          | 14q. | .   | . | .                             | . | . | . | . | . | . |
| MOK:1  | ENST0000.          | 14q. | Sc. | . | rs7571156.                    | . | . | . | . | . | . |
| .      | ENST0000.          | 14q. | .   | . | rs9721368.                    | . | . | . | . | . | . |
| .      | ENST0000.          | 14q. | .   | . | rs1043142.                    | . | . | . | . | . | . |
| KIF26A | ENST0000.          | 14q. | .   | . | .                             | . | . | . | . | . | . |
| TMEM1  | ENST0000.          | 14q. | Sc. | . | .                             | . | . | . | . | . | . |
| .      | ENST0000.          | 14q. | .   | . | .                             | . | . | . | . | . | . |
| .      | ENST0000.          | 14q. | .   | . | rs7564163.                    | . | . | . | . | . | . |
| .      | ENST0000.          | 14q. | .   | . | rs7689001.                    | . | . | . | . | . | . |
| .      | ENST0000.          | 14q. | .   | . | .                             | . | . | . | . | . | . |
| PACS2  | ENST0000.          | 14q. | .   | . | rs7822187.                    | . | . | . | . | . | . |
| .      | ENST0000.          | 14q. | .   | . | rs7820214.                    | . | . | . | . | . | . |
| .      | ENST0000.          | 14q. | .   | . | Score=0.9.                    | . | . | . | . | . | . |
| .      | .                  | 14q. | .   | . | Score=0.8.                    | . | . | . | . | . | . |
| .      | .                  | 15q. | .   | . | Score=0.9 Score rs2005484 ID. | . | . | . | . | . | . |
| .      | ENST0000.          | 15q. | .   | . | Score=0.9.                    | . | . | . | . | . | . |
| .      | .                  | 15q. | .   | . | Score=0.9 Score.              | . | . | . | . | . | . |
| .      | ENST0000.          | 15q. | .   | . | Score=0.9.                    | . | . | . | . | . | . |
| .      | ENST0000.          | 15q. | .   | . | .                             | . | . | . | . | . | . |
| .      | ENST0000.          | 15q. | .   | . | Score=0.9.                    | . | . | . | . | . | . |
| .      | ENST0000.          | 15q. | .   | . | Score=0.9 Score.              | . | . | . | . | . | . |
| .      | ENST0000.          | 15q. | .   | . | Score=0.9.                    | . | . | . | . | . | . |
| .      | ENST0000.          | 15q. | .   | . | Score=0.9 (Score rs7605191.   | . | . | . | . | . | . |
| .      | ENST0000.          | 15q. | .   | . | rs9195421.                    | . | . | . | . | . | . |
| .      | ENST0000.          | 15q. | .   | . | .                             | . | . | . | . | . | . |
| .      | ENST0000.          | 15q. | .   | . | rs7485099.                    | . | . | . | . | . | . |
| .      | ENST0000.          | 15q. | .   | . | .                             | . | . | . | . | . | . |
| .      | ENST0000.          | 15q. | .   | . | rs9209119.                    | . | . | . | . | . | . |
| .      | ENST0000.          | 15q. | .   | . | rs3718584 ID.                 | . | . | . | . | . | . |
| HERC2  | ENST0000.          | 15q. | .   | . | Score=0.9.                    | . | . | . | . | . | . |
| GOLG7  | ENST0000.          | 15q. | .   | . | Score=0.9 (rs2021672 ID.      | . | . | . | . | . | . |
| .      | ENST0000.          | 15q. | .   | . | .                             | . | . | . | . | . | . |
| GOLG7  | ENST0000.          | 15q. | .   | . | Score=0.9.                    | . | . | . | . | . | . |
| .      | ENST0000.          | 15q. | .   | . | Score=0.9.                    | . | . | . | . | . | . |
| .      | ENST0000.          | 15q. | .   | . | Score=0.9 (Score rs1995696.   | . | . | . | . | . | . |
| .      | ENST0000.          | 15q. | .   | . | Score=0.9 ID.                 | . | . | . | . | . | . |
| OTUD7  | ENST0000.          | 15q. | .   | . | .                             | . | . | . | . | . | . |
| .      | .                  | 15q. | .   | . | Score=0.9 (rs1127716.         | . | . | . | . | . | . |
| .      | ENST0000.          | 15q. | .   | . | .                             | . | . | . | . | . | . |
| .      | ENST0000.          | 15q. | .   | . | .                             | . | . | . | . | . | . |
| PAK6:1 | ENST0000.          | 15q. | Sc. | . | .                             | . | . | . | . | . | . |
| .      | ENST0000.          | 15q. | .   | . | .                             | . | . | . | . | . | . |
| .      | ENST0000.          | 15q. | .   | . | rs3704110.                    | . | . | . | . | . | . |
| .      | ENST0000.          | 15q. | .   | . | .                             | . | . | . | . | . | . |
| TTBK2: | ENST0000.          | 15q. | Sc. | . | rs5310947 ID.                 | . | . | . | . | . | . |
| TUBGC  | ENST0000.          | 15q. | .   | . | rs7551745 ID.                 | . | . | . | . | . | . |
| CKMT1  | ENST0000.          | 15q. | .   | . | Score=0.9 (rs5360360.         | . | . | . | . | . | . |



|             |           |             |             |        |                     |           |       |
|-------------|-----------|-------------|-------------|--------|---------------------|-----------|-------|
| . ENST0000. | 15q.      | . Score=0.9 | .           | .      | .                   | .         | .     |
| . ENST0000. | 15q.      | . Score=0.9 | rs5322560   | .      | .                   | .         | .     |
| . ENST0000. | 15q.      | . Score=0.9 | .           | .      | .                   | .         | .     |
| DUOX1       | ENST0000. | 15q.        | Sc.         | .      | .                   | .         | .     |
| . ENST0000. | 15q.      | .           | .           | .      | .                   | .         | .     |
| FBN1:↑      | ENST0000. | 15q.        | .           | .      | rs7737859           | .         | .     |
| FBN1:↑      | ENST0000. | 15q.        | Sc.         | .      | rs1409544 ID: Uncer | .         | 0.001 |
| . ENST0000. | 15q.      | .           | .           | .      | .                   | .         | .     |
| . ENST0000. | 15q.      | .           | .           | .      | .                   | .         | .     |
| . ENST0000. | 15q.      | .           | .           | .      | .                   | .         | .     |
| . ENST0000. | 15q.      | .           | .           | .      | .                   | .         | .     |
| MYO5C       | ENST0000. | 15q.        | Sc.         | .      | rs3686733 ID:       | .         | .     |
| . ENST0000. | 15q.      | .           | .           | .      | .                   | .         | .     |
| AQP9:↑      | ENST0000. | 15q.        | Sc.         | .      | .                   | .         | .     |
| TLN2:↓      | ENST0000. | 15q.        | .           | .      | rs7793599           | .         | .     |
| MTFM1       | ENST0000. | 15q.        | .           | .      | rs7518805           | .         | .     |
| IGDCC       | ENST0000. | 15q.        | Sc.         | .      | .                   | .         | .     |
| IGDCC       | ENST0000. | 15q.        | Sc.         | .      | rs5369412           | .         | 0.001 |
| . ENST0000. | 15q.      | .           | .           | Score. | .                   | .         | .     |
| . ENST0000. | 15q.      | .           | .           | .      | .                   | .         | .     |
| . ENST0000. | 15q.      | .           | .           | .      | .                   | .         | .     |
| . ENST0000. | 15q.      | .           | .           | .      | rs7568129 ID:       | .         | .     |
| . ENST0000. | 15q.      | .           | .           | .      | .                   | .         | .     |
| . ENST0000. | 15q.      | .           | .           | Score  | rs5460720           | .         | 0.001 |
| . ENST0000. | 15q.      | .           | .           | .      | .                   | .         | .     |
| CELF6:      | ENST0000. | 15q.        | .           | .      | .                   | .         | .     |
| . ENST0000. | 15q.      | .           | .           | .      | rs1043159           | .         | .     |
| . ENST0000. | 15q.      | .           | .           | .      | .                   | .         | .     |
| . ENST0000. | 15q.      | . Score=0.9 | .           | .      | .                   | .         | .     |
| . ENST0000. | 15q.      | . Score=0.9 | .           | .      | .                   | .         | .     |
| . ENST0000. | 15q.      | .           | .           | .      | rs9744245           | .         | .     |
| . ENST0000. | 15q.      | .           | .           | .      | rs1047518           | .         | .     |
| . ENST0000. | 15q.      | . Score=0.9 | .           | .      | rs8789048 ID:       | .         | .     |
| . ENST0000. | 15q.      | . Score=0.9 | .           | .      | .                   | .         | .     |
| . ENST0000. | 15q.      | . Score=0.9 | .           | .      | .                   | .         | .     |
| KIAA10      | ENST0000. | 15q.        | .           | .      | rs1471333 ID:       | .         | .     |
| . ENST0000. | 15q.      | .           | .           | Score. | .                   | .         | .     |
| . ENST0000. | 15q.      | .           | .           | .      | rs5292517           | .         | .     |
| . ENST0000. | 15q.      | .           | .           | .      | .                   | .         | .     |
| . ENST0000. | 15q.      | .           | .           | .      | rs9410184           | .         | .     |
| GOLG7       | ENST0000. | 15q.        | . Score=0.9 | .      | rs7920451 ID:       | .         | .     |
| . ENST0000. | 15q.      | .           | .           | .      | .                   | .         | .     |
| KLHL2?      | ENST0000. | 15q.        | .           | .      | rs3718116           | .         | .     |
| POLG:I      | ENST0000. | 15q.        | .           | .      | .                   | .         | .     |
| . ENST0000. | 15q.      | .           | .           | Score. | .                   | .         | .     |
| KIF7:NI     | ENST0000. | 15q.        | Sc.         | .      | rs2012804           | .         | .     |
| KIF7:NI     | ENST0000. | 15q.        | .           | .      | ID:                 | .         | .     |
| UNKNC       | ENST0000. | 15q.        | .           | .      | rs1475111           | .         | .     |
| . .         | .         | 15q.        | .           | .      | Score               | rs5584446 | 0.001 |
| ADAM1       | ENST0000. | 15q.        | .           | .      | .                   | .         | .     |
| . ENST0000. | 15q.      | .           | .           | .      | .                   | .         | .     |
| . ENST0000. | 15q.      | .           | .           | Score. | .                   | .         | .     |
| UNKNC       | ENST0000. | 15q.        | Sc.         | .      | rs7764234 ID:       | .         | .     |
| . ENST0000. | 15q.      | .           | .           | .      | .                   | .         | .     |

|                  |      |                |                     |           |           |
|------------------|------|----------------|---------------------|-----------|-----------|
| . ENST0000.      | 15q. | . Score=0.97.  | . . . . .           | . . . . . | . . . . . |
| . ENST0000.      | 15q. | . Score=0.97.  | rs3682087.          | . . . . . | . . . . . |
| . ENST0000.      | 15q. | . Score=0.97.  | . . . . .           | . . . . . | . . . . . |
| . ENST0000.      | 15q. | . Score=0.97.  | . . . . .           | . . . . . | . . . . . |
| UNKNC ENST0000.  | 16p. | . . . . .      | rs7613665.          | . . . . . | . . . . . |
| ITFG3: ENST0000. | 16p. | . . . . .      | . . . . .           | . . . . . | . . . . . |
| . ENST0000.      | 16p. | . . . . .      | . . . . .           | . . . . . | . . . . . |
| . ENST0000.      | 16p. | . . . . .      | Score rs8927038.    | . . . . . | . . . . . |
| WFIKK ENST0000.  | 16p. | . . . . .      | rs1998911.          | . . . . . | . . . . . |
| . ENST0000.      | 16p. | . . . . .      | Score rs2010028 ID: | . . . . . | . . . . . |
| JMJD8: ENST0000. | 16p. | . . . . .      | Score rs7767345 ID: | . . . . . | . . . . . |
| FBXL1: ENST0000. | 16p. | . . . . .      | rs1466306.          | . . . . . | . . . . . |
| NARFL ENST0000.  | 16p. | . . . . .      | rs3681933.          | . . . . . | . . . . . |
| CHTF1 ENST0000.  | 16p. | . . . . .      | . . . . .           | . . . . . | . . . . . |
| . ENST0000.      | 16p. | . . . . .      | . . . . .           | . . . . . | . . . . . |
| SSTR5 ENST0000.  | 16p. | . . . . .      | rs1506415.          | . . . . . | . . . . . |
| . ENST0000.      | 16p. | . . . . .      | rs9971019.          | . . . . . | . . . . . |
| BAIAP: ENST0000. | 16p. | . . . . .      | . . . . .           | . . . . . | . . . . . |
| . ENST0000.      | 16p. | . . . . .      | rs3710800.          | . . . . . | . . . . . |
| BAIAP: ENST0000. | 16p. | . . . . .      | . . . . .           | . . . . . | . . . . . |
| . ENST0000.      | 16p. | . . . . .      | rs7592188.          | . . . . . | . . . . . |
| BAIAP: ENST0000. | 16p. | . . . . .      | . . . . .           | . . . . . | . . . . . |
| . . . . .        | 16p. | . . . . .      | rs5365360.          | . . . . . | 0.002     |
| CLCN7 ENST0000.  | 16p. | Sc.            | rs7601714.          | . . . . . | . . . . . |
| . ENST0000.      | 16p. | . . . . .      | . . . . .           | . . . . . | . . . . . |
| HN1L: ENST0000.  | 16p. | . . . . .      | rs1450874 ID:       | . . . . . | . . . . . |
| MAPK8 ENST0000.  | 16p. | . . . . .      | . . . . .           | . . . . . | . . . . . |
| RPL3L: ENST0000. | 16p. | . . . . .      | rs3749279.          | . . . . . | . . . . . |
| . ENST0000.      | 16p. | . . . . .      | . . . . .           | . . . . . | . . . . . |
| ZNF59: ENST0000. | 16p. | . . . . .      | rs7634894.          | . . . . . | . . . . . |
| . ENST0000.      | 16p. | . . . . .      | . . . . .           | . . . . . | . . . . . |
| . ENST0000.      | 16p. | . . . . .      | . . . . .           | . . . . . | . . . . . |
| . ENST0000.      | 16p. | . . . . .      | . . . . .           | . . . . . | . . . . . |
| . ENST0000.      | 16p. | . . . . .      | Score rs1416929.    | . . . . . | 0.015     |
| ZNF59: ENST0000. | 16p. | Sc.            | . . . . .           | . . . . . | . . . . . |
| . ENST0000.      | 16p. | . . . . .      | rs7525617.          | . . . . . | . . . . . |
| SLX4: ENST0000.  | 16p. | . . . . .      | rs5345285.          | Likely .  | 0.008     |
| CREBE ENST0000.  | 16p. | Sc.            | . . . . .           | . . . . . | . . . . . |
| . ENST0000.      | 16p. | . . . . .      | Score rs5502446.    | . . . . . | 0.001     |
| . ENST0000.      | 16p. | . . . . .      | rs1894802.          | . . . . . | . . . . . |
| ADCY9 ENST0000.  | 16p. | . . . . .      | rs3711593 ID:       | . . . . . | . . . . . |
| VASN: ENST0000.  | 16p. | . . . . .      | rs2013575.          | . . . . . | . . . . . |
| PPL: ENST0000.   | 16p. | . . . . .      | . . . . .           | . . . . . | . . . . . |
| CIITA: ENST0000. | 16p. | . . . . .      | rs5632991 ID:       | . . . . . | 0.001     |
| . ENST0000.      | 16p. | . . . . .      | rs7679436.          | . . . . . | . . . . . |
| . ENST0000.      | 16p. | . . . . .      | rs9184234.          | . . . . . | . . . . . |
| . ENST0000.      | 16p. | . . . . .      | rs7800288.          | . . . . . | . . . . . |
| . ENST0000.      | 16p. | . Score=0.97.  | Score rs5668064.    | . . . . . | . . . . . |
| . ENST0000.      | 16p. | . Score=0.97.  | rs7507758.          | . . . . . | . . . . . |
| . ENST0000.      | 16p. | . . . . .      | . . . . .           | . . . . . | . . . . . |
| . ENST0000.      | 16p. | . . . . .      | . . . . .           | . . . . . | . . . . . |
| . ENST0000.      | 16p. | . . . . .      | Score.              | . . . . . | . . . . . |
| . ENST0000.      | 16p. | Sc Score=0.97. | . . . . .           | . . . . . | . . . . . |
| SMG1: ENST0000.  | 16p. | . Score=0.97.  | rs1784261 ID:       | . . . . . | . . . . . |

|                  |      |                                |   |                     |   |   |   |      |
|------------------|------|--------------------------------|---|---------------------|---|---|---|------|
| SYT17:ENST0000.  | 16p. | .                              | . | rs7575963.          | . | . | . | .    |
| UMOD:ENST0000.   | 16p. | .                              | . | rs7647908.          | . | . | . | .    |
| UNKNC ENST0000.  | 16p. | .                              | . | .                   | . | . | . | .    |
| . ENST0000.      | 16p. | .                              | . | rs1829590.          | . | . | . | .    |
| GGA2:↓ENST0000.  | 16p. | Sc.                            | . | .                   | . | . | . | .    |
| ERN2:↑ENST0000.  | 16p. | .                              | . | .                   | . | . | . | .    |
| . ENST0000.      | 16p. | .                              | . | Score rs9722593.    | . | . | . | .    |
| . .              | 16p. | .                              | . | .                   | . | . | . | .    |
| GTF3C ENST0000.  | 16p. | .                              | . | .                   | . | . | . | .    |
| . ENST0000.      | 16p. | .                              | . | .                   | . | . | . | .    |
| KIAA05 ENST0000. | 16p. | .                              | . | rs1412530.          | . | . | . | .    |
| . ENST0000.      | 16p. | .                              | . | rs1909424.          | . | . | . | 0.02 |
| . ENST0000.      | 16p. | Score=0.9f.                    | . | .                   | . | . | . | .    |
| ATXN2 ENST0000.  | 16p. | Sc.                            | . | rs7491998.          | . | . | . | .    |
| . ENST0000.      | 16p. | .                              | . | .                   | . | . | . | .    |
| ATP2A ENST0000.  | 16p. | .                              | . | rs1820846.          | . | . | . | .    |
| . ENST0000.      | 16p. | Score=0.9f.                    | . | .                   | . | . | . | .    |
| . ENST0000.      | 16p. | Sc.                            | . | .                   | . | . | . | .    |
| KCTD1 ENST0000.  | 16p. | Sc.                            | . | rs7813295.          | . | . | . | .    |
| . ENST0000.      | 16p. | .                              | . | Score rs9659529.    | . | . | . | .    |
| . ENST0000.      | 16p. | .                              | . | .                   | . | . | . | .    |
| . ENST0000.      | 16p. | Score=0.9f.                    | . | .                   | . | . | . | .    |
| ZNF26: ENST0000. | 16p. | .                              | . | .                   | . | . | . | .    |
| . ENST0000.      | 16p. | Score=0.9f.                    | . | rs7477221.          | . | . | . | .    |
| . ENST0000.      | 16p. | Score=0.9f.                    | . | rs460256 ID.        | . | . | . | 0.19 |
| . ENST0000.      | 16p. | Score=0.9f.                    | . | .                   | . | . | . | .    |
| . ENST0000.      | 16p. | Score=0.9f Score.              | . | .                   | . | . | . | .    |
| . ENST0000.      | 16p. | Score=0.9f Score rs3744640 ID. | . | .                   | . | . | . | 0.1  |
| . .              | 16p. | Score=0.9f.                    | . | .                   | . | . | . | .    |
| . ENST0000.      | 16p. | Sc Score=0.9f.                 | . | .                   | . | . | . | .    |
| . ENST0000.      | 16p. | .                              | . | Score.              | . | . | . | .    |
| . .              | 16q. | .                              | . | Score rs1333894.    | . | . | . | .    |
| . .              | 16q. | .                              | . | Score rs2885478 ID. | . | . | . | .    |
| . .              | 16q. | .                              | . | Score rs4249087 ID. | . | . | . | .    |
| . .              | 16q. | .                              | . | Score rs5591122.    | . | . | . | .    |
| . .              | 16q. | .                              | . | Score rs4246405.    | . | . | . | .    |
| . .              | 16q. | .                              | . | Score rs4292070 ID. | . | . | . | .    |
| . .              | 16q. | .                              | . | Score rs8799648.    | . | . | . | .    |
| . .              | 16q. | .                              | . | Score rs8799977.    | . | . | . | .    |
| . .              | 16q. | .                              | . | Score rs4291933.    | . | . | . | .    |
| . .              | 16q. | .                              | . | Score rs4375682.    | . | . | . | .    |
| . .              | 16q. | .                              | . | Score rs7200104 ID. | . | . | . | .    |
| . .              | 16q. | .                              | . | Score rs7188643.    | . | . | . | .    |
| . .              | 16q. | .                              | . | Score rs9328642.    | . | . | . | .    |
| . .              | 16q. | .                              | . | Score rs7205231.    | . | . | . | .    |
| . .              | 16q. | .                              | . | Score rs4445923.    | . | . | . | .    |
| . .              | 16q. | .                              | . | Score rs2887500 ID. | . | . | . | .    |
| . .              | 16q. | .                              | . | Score rs2888543.    | . | . | . | .    |
| . .              | 16q. | .                              | . | Score rs7664258.    | . | . | . | .    |
| . .              | 16q. | .                              | . | Score rs4249076.    | . | . | . | .    |
| . .              | 16q. | .                              | . | Score.              | . | . | . | .    |
| MYLK3 ENST0000.  | 16q. | .                              | . | rs3683497.          | . | . | . | .    |
| . ENST0000.      | 16q. | .                              | . | .                   | . | . | . | .    |
| . ENST0000.      | 16q. | .                              | . | .                   | . | . | . | .    |



|                 |      |              |                     |   |   |       |
|-----------------|------|--------------|---------------------|---|---|-------|
| PELP1:ENST0000. | 17p. | Sc.          | rs3764321           | . | . | .     |
| KIF1C:ENST0000. | 17p. | Sc Score=0.9 | rs2008227 ID:       | . | . | .     |
| ZNF59:ENST0000. | 17p. | Score=0.9    | rs2013516 ID:       | . | . | .     |
| . ENST0000.     | 17p. | .            | Score.              | . | . | .     |
| KIAA07ENST0000. | 17p. | .            | .                   | . | . | .     |
| . ENST0000.     | 17p. | .            | .                   | . | . | .     |
| . ENST0000.     | 17p. | .            | Score.              | . | . | .     |
| NEURL ENST0000. | 17p. | Sc.          | rs2000463           | . | . | .     |
| POLR2 ENST0000. | 17p. | .            | rs7455911           | . | . | .     |
| CCDC4ENST0000.  | 17p. | Sc.          | rs1473707           | . | . | .     |
| UNKNC ENST0000. | 17p. | .            | .                   | . | . | .     |
| . ENST0000.     | 17p. | .            | .                   | . | . | .     |
| . ENST0000.     | 17p. | .            | rs7534759           | . | . | .     |
| DNAH9 ENST0000. | 17p. | .            | .                   | . | . | .     |
| HS3ST ENST0000. | 17p. | .            | .                   | . | . | .     |
| TEKT3:ENST0000. | 17p. | .            | rs7633797           | . | . | .     |
| . ENST0000.     | 17p. | Score=0.9    | rs6207237           | . | . | .     |
| NCOR1ENST0000.  | 17p. | Sc.          | .                   | . | . | .     |
| . ENST0000.     | 17p. | .            | .                   | . | . | .     |
| . ENST0000.     | 17p. | .            | .                   | . | . | .     |
| . ENST0000.     | 17p. | .            | .                   | . | . | .     |
| . ENST0000.     | 17p. | .            | rs1157965           | . | . | .     |
| . ENST0000.     | 17p. | .            | .                   | . | . | .     |
| . ENST0000.     | 17p. | Score=0.9    | .                   | . | . | .     |
| LGALS ENST0000. | 17p. | Sc Score=0.9 | .                   | . | . | .     |
| . ENST0000.     | 17p. | Score=0.9    | rs2869918 ID:       | . | . | 0.654 |
| . ENST0000.     | 17p. | .            | rs7529523           | . | . | .     |
| . ENST0000.     | 17p. | .            | .                   | . | . | .     |
| . ENST0000.     | 17q. | Score=0.9    | .                   | . | . | .     |
| . ENST0000.     | 17q. | .            | .                   | . | . | .     |
| . ENST0000.     | 17q. | .            | .                   | . | . | .     |
| . ENST0000.     | 17q. | .            | .                   | . | . | .     |
| . ENST0000.     | 17q. | .            | .                   | . | . | .     |
| . ENST0000.     | 17q. | .            | .                   | . | . | .     |
| . ENST0000.     | 17q. | .            | Score.              | . | . | .     |
| . ENST0000.     | 17q. | .            | rs1051245           | . | . | .     |
| . ENST0000.     | 17q. | .            | .                   | . | . | .     |
| SEZ6:ENST0000.  | 17q. | .            | .                   | . | . | .     |
| MYO18ENST0000.  | 17q. | Sc.          | .                   | . | . | .     |
| . ENST0000.     | 17q. | .            | Score rs7968757 ID: | . | . | .     |
| EVI2A:ENST0000. | 17q. | Sc.          | rs5324904           | . | . | .     |
| . ENST0000.     | 17q. | .            | .                   | . | . | .     |
| . ENST0000.     | 17q. | .            | .                   | . | . | .     |
| . ENST0000.     | 17q. | .            | .                   | . | . | .     |
| . ENST0000.     | 17q. | .            | .                   | . | . | .     |
| NLE1:ENST0000.  | 17q. | Sc.          | .                   | . | . | .     |
| SLFN1 ENST0000. | 17q. | Score=0.8    | rs7610872 ID:       | . | . | .     |
| . ENST0000.     | 17q. | Score=0.9    | .                   | . | . | .     |
| . ENST0000.     | 17q. | .            | .                   | . | . | .     |
| . ENST0000.     | 17q. | Score=0.9    | rs3702689           | . | . | .     |
| . ENST0000.     | 17q. | Score=0.9    | Score rs3720623     | . | . | .     |
| . ENST0000.     | 17q. | Score=0.9    | ID:                 | . | . | .     |
| PCGF2 ENST0000. | 17q. | .            | rs7545869           | . | . | .     |
| . ENST0000.     | 17q. | .            | Score.              | . | . | .     |
| CACNE ENST0000. | 17q. | .            | rs7807350           | . | . | .     |
| . ENST0000.     | 17q. | .            | .                   | . | . | .     |



|                  |      |           |   |               |     |   |   |   |       |
|------------------|------|-----------|---|---------------|-----|---|---|---|-------|
| . ENST0000.      | 17q. | .         | . | .             | .   | . | . | . | .     |
| CYGB: ENST0000.  | 17q. | Sc.       | . | rs3697050.    | .   | . | . | . | .     |
| . ENST0000.      | 17q. | .         | . | .             | .   | . | . | . | .     |
| . ENST0000.      | 17q. | .         | . | .             | .   | . | . | . | .     |
| . ENST0000.      | 17q. | .         | . | rs7670774.    | .   | . | . | . | .     |
| . ENST0000.      | 17q. | .         | . | .             | .   | . | . | . | .     |
| DNAH1 ENST0000.  | 17q. | Sc.       | . | rs7521502.    | .   | . | . | . | .     |
| RBFOX ENST0000.  | 17q. | .         | . | .             | .   | . | . | . | .     |
| CBX4: ENST0000.  | 17q. | Sc.       | . | .             | .   | . | . | . | .     |
| CCDC4 ENST0000.  | 17q. | .         | . | rs5354610 ID. | .   | . | . | . | .     |
| . ENST0000.      | 17q. | .         | . | rs7737952.    | .   | . | . | . | .     |
| CARD1 ENST0000.  | 17q. | .         | . | rs3676544.    | .   | . | . | . | .     |
| . ENST0000.      | 17q. | .         | . | .             | .   | . | . | . | .     |
| . ENST0000.      | 17q. | .         | . | .             | .   | . | . | . | .     |
| BAIAP2 ENST0000. | 17q. | .         | . | .             | .   | . | . | . | .     |
| . ENST0000.      | 17q. | .         | . | .             | .   | . | . | . | .     |
| . ENST0000.      | 17q. | .         | . | rs3678800.    | .   | . | . | . | .     |
| . ENST0000.      | 17q. | .         | . | .             | .   | . | . | . | .     |
| OXLD1 ENST0000.  | 17q. | .         | . | .             | ID. | . | . | . | .     |
| . ENST0000.      | 17q. | .         | . | .             | .   | . | . | . | .     |
| . ENST0000.      | 17q. | .         | . | .             | .   | . | . | . | .     |
| FASN: ENST0000.  | 17q. | .         | . | .             | .   | . | . | . | .     |
| FASN: ENST0000.  | 17q. | .         | . | rs7594547 ID. | .   | . | . | . | .     |
| . ENST0000.      | 17q. | .         | . | .             | .   | . | . | . | .     |
| WDR4: ENST0000.  | 17q. | Sc.       | . | rs1452537 ID. | .   | . | . | . | .     |
| ZNF75( ENST0000. | 17q. | .         | . | .             | .   | . | . | . | .     |
| ADCYA ENST0000.  | 18p. | .         | . | .             | .   | . | . | . | .     |
| . ENST0000.      | 18p. | .         | . | .             | .   | . | . | . | .     |
| . ENST0000.      | 18p. | .         | . | .             | .   | . | . | . | .     |
| . ENST0000.      | 18p. | .         | . | Score.        | ID. | . | . | . | .     |
| MC2R: ENST0000.  | 18p. | .         | . | .             | .   | . | . | . | .     |
| . ENST0000.      | 18p. | Score=0.9 | . | .             | .   | . | . | . | .     |
| . ENST0000.      | 18p. | Score=0.9 | . | ID.           | .   | . | . | . | .     |
| GREB1 ENST0000.  | 18q. | .         | . | .             | .   | . | . | . | .     |
| . ENST0000.      | 18q. | .         | . | rs1390032.    | .   | . | . | . | .     |
| . ENST0000.      | 18q. | .         | . | Score.        | .   | . | . | . | .     |
| LAMA3 ENST0000.  | 18q. | .         | . | rs5453420.    | .   | . | . | . | 0.001 |
| . ENST0000.      | 18q. | .         | . | rs7793765.    | .   | . | . | . | .     |
| ELP2: ENST0000.  | 18q. | .         | . | .             | .   | . | . | . | .     |
| EPG5: ENST0000.  | 18q. | .         | . | .             | .   | . | . | . | .     |
| . ENST0000.      | 18q. | .         | . | rs7789211.    | .   | . | . | . | .     |
| . ENST0000.      | 18q. | .         | . | .             | .   | . | . | . | .     |
| MYO5E ENST0000.  | 18q. | .         | . | rs7710491.    | .   | . | . | . | .     |
| . ENST0000.      | 18q. | .         | . | .             | .   | . | . | . | .     |
| . ENST0000.      | 18q. | Score=0.9 | . | .             | .   | . | . | . | .     |
| ZCCHC ENST0000.  | 18q. | .         | . | .             | .   | . | . | . | .     |
| SERPI ENST0000.  | 18q. | .         | . | rs1417032.    | .   | . | . | . | .     |
| SERPI ENST0000.  | 18q. | Score=0.9 | . | .             | .   | . | . | . | .     |
| RTTN: ENST0000.  | 18q. | .         | . | .             | ID. | . | . | . | .     |
| ZNF40 ENST0000.  | 18q. | .         | . | .             | .   | . | . | . | .     |
| . ENST0000.      | 18q. | .         | . | .             | .   | . | . | . | .     |
| . ENST0000.      | 19p. | .         | . | rs1020066.    | .   | . | . | . | .     |
| . ENST0000.      | 19p. | .         | . | .             | ID. | . | . | . | .     |
| . ENST0000.      | 19p. | .         | . | rs3749392.    | .   | . | . | . | .     |

|        |          |     |    |   |                 |                 |   |   |       |
|--------|----------|-----|----|---|-----------------|-----------------|---|---|-------|
| POLRM  | ENST0000 | 19p | .  | . | rs7789396       | .               | . | . | .     |
| PALM:† | ENST0000 | 19p | .  | . | .               | .               | . | . | .     |
| .      | ENST0000 | 19p | .  | . | rs3777310       | .               | . | . | 0.001 |
| TMEM2  | ENST0000 | 19p | Sc | . | .               | .               | . | . | .     |
| HMHA1  | ENST0000 | 19p | .  | . | rs9456811       | .               | . | . | .     |
| .      | ENST0000 | 19p | .  | . | .               | .               | . | . | .     |
| UNKNC  | ENST0000 | 19p | .  | . | rs7620114       | ID              | . | . | .     |
| SBNO2  | ENST0000 | 19p | Sc | . | rs2022226       | .               | . | . | .     |
| .      | ENST0000 | 19p | .  | . | .               | .               | . | . | .     |
| .      | ENST0000 | 19p | .  | . | Score rs7799382 | .               | . | . | .     |
| SBNO2  | ENST0000 | 19p | .  | . | .               | .               | . | . | .     |
| .      | ENST0000 | 19p | .  | . | .               | .               | . | . | .     |
| CIRBP: | ENST0000 | 19p | .  | . | rs3753640       | .               | . | . | .     |
| .      | ENST0000 | 19p | .  | . | Score           | .               | . | . | .     |
| .      | ENST0000 | 19p | .  | . | .               | .               | . | . | .     |
| PLK5:N | ENST0000 | 19p | .  | . | rs1007918       | .               | . | . | .     |
| DOT1L  | ENST0000 | 19p | Sc | . | rs3694032       | .               | . | . | .     |
| .      | ENST0000 | 19p | .  | . | rs7522031       | ID              | . | . | .     |
| SGTA:† | ENST0000 | 19p | .  | . | .               | ID              | . | . | .     |
| .      | ENST0000 | 19p | .  | . | .               | .               | . | . | .     |
| S1PR4  | ENST0000 | 19p | Sc | . | rs3763485       | .               | . | . | .     |
| .      | ENST0000 | 19p | .  | . | rs7773785       | .               | . | . | .     |
| .      | ENST0000 | 19p | .  | . | Score           | .               | . | . | .     |
| .      | ENST0000 | 19p | .  | . | Score           | .               | . | . | .     |
| ANKRC  | ENST0000 | 19p | .  | . | rs7591374       | .               | . | . | .     |
| SH3GL  | ENST0000 | 19p | .  | . | .               | ID              | . | . | .     |
| LRG1:† | ENST0000 | 19p | .  | . | rs1503658       | .               | . | . | .     |
| SEMA6  | ENST0000 | 19p | .  | . | Score           | .               | . | . | .     |
| KDM4E  | ENST0000 | 19p | .  | . | .               | .               | . | . | .     |
| .      | ENST0000 | 19p | .  | . | .               | .               | . | . | .     |
| .      | ENST0000 | 19p | .  | . | rs1018214       | .               | . | . | .     |
| UNKNC  | ENST0000 | 19p | .  | . | rs7632840       | ID              | . | . | .     |
| .      | ENST0000 | 19p | .  | . | Score           | .               | . | . | .     |
| ARHGE  | ENST0000 | 19p | .  | . | rs1390681       | .               | . | . | .     |
| .      | ENST0000 | 19p | .  | . | rs3770694       | .               | . | . | .     |
| XAB2:† | ENST0000 | 19p | .  | . | rs3745730       | .               | . | . | .     |
| XAB2:† | ENST0000 | 19p | .  | . | rs7516930       | .               | . | . | .     |
| STXBP  | ENST0000 | 19p | .  | . | rs1417170       | ID              | . | . | .     |
| .      | ENST0000 | 19p | .  | . | Score=0.8       | .               | . | . | .     |
| .      | ENST0000 | 19p | .  | . | .               | .               | . | . | .     |
| .      | ENST0000 | 19p | .  | . | rs7595385       | .               | . | . | .     |
| FBN3:† | ENST0000 | 19p | .  | . | rs3527749       | ID              | . | . | 0.005 |
| .      | ENST0000 | 19p | .  | . | rs7615602       | .               | . | . | .     |
| .      | ENST0000 | 19p | .  | . | rs5308100       | .               | . | . | 0.007 |
| ACTL9: | ENST0000 | 19p | .  | . | .               | ID              | . | . | .     |
| .      | .        | 19p | .  | . | Score=0.9       | Score rs3694972 | . | . | .     |
| .      | .        | 19p | .  | . | Score=0.9       | Score rs3751712 | . | . | .     |
| MUC1ε  | ENST0000 | 19p | .  | . | Score=0.9       | rs5686926       | . | . | 0.001 |
| MUC1ε  | ENST0000 | 19p | .  | . | rs7801357       | .               | . | . | .     |
| MUC1ε  | ENST0000 | 19p | .  | . | .               | .               | . | . | .     |
| .      | ENST0000 | 19p | .  | . | .               | .               | . | . | .     |
| PIN1:N | ENST0000 | 19p | Sc | . | rs7564749       | .               | . | . | .     |
| OLFM2  | ENST0000 | 19p | Sc | . | rs7814402       | ID              | . | . | .     |
| C19orf | ENST0000 | 19p | .  | . | .               | .               | . | . | .     |



|        |           |      |     |           |            |            |     |   |   |   |       |
|--------|-----------|------|-----|-----------|------------|------------|-----|---|---|---|-------|
| PPAN-I | ENST0000. | 19p. | Sc. | .         | .          | .          | .   | . | . | . | .     |
| .      | ENST0000. | 19p. | .   | .         | .          | .          | .   | . | . | . | .     |
| ICAM1: | ENST0000. | 19p. | .   | .         | .          | .          | .   | . | . | . | .     |
| .      | ENST0000. | 19p. | .   | .         | .          | .          | .   | . | . | . | .     |
| TYK2:  | ENST0000. | 19p. | Sc. | .         | rs1383503  | ID.        | .   | . | . | . | .     |
| PDE4A  | ENST0000. | 19p. | .   | .         | rs2009930. | .          | .   | . | . | . | .     |
| .      | ENST0000. | 19p. | .   | .         | Score.     | .          | .   | . | . | . | .     |
| KRI1:  | ENST0000. | 19p. | .   | .         | .          | .          | .   | . | . | . | .     |
| LDLR:  | ENST0000. | 19p. | Sc. | .         | rs7634492  | ID.        | .   | . | . | . | .     |
| .      | ENST0000. | 19p. | .   | .         | rs3737274  | ID.        | .   | . | . | . | .     |
| DOCK6  | ENST0000. | 19p. | .   | .         | rs3721772. | .          | .   | . | . | . | .     |
| .      | ENST0000. | 19p. | .   | .         | .          | .          | .   | . | . | . | .     |
| .      | ENST0000. | 19p. | .   | .         | Score      | rs5385135  | ID. | . | . | . | .     |
| .      | ENST0000. | 19p. | .   | .         | Score.     | .          | .   | . | . | . | .     |
| DAND5  | ENST0000. | 19p. | Sc. | .         | rs3710318. | .          | .   | . | . | . | .     |
| RFX1:  | ENST0000. | 19p. | Sc. | .         | .          | ID.        | .   | . | . | . | .     |
| PRKAC  | ENST0000. | 19p. | Sc. | .         | .          | .          | .   | . | . | . | .     |
| .      | ENST0000. | 19p. | Sc. | .         | Score.     | .          | .   | . | . | . | .     |
| OR10H  | ENST0000. | 19p. | .   | Score=0.9 | .          | ID.        | .   | . | . | . | .     |
| KLF2:  | ENST0000. | 19p. | .   | .         | .          | .          | .   | . | . | . | .     |
| .      | ENST0000. | 19p. | .   | .         | rs1015670. | .          | .   | . | . | . | .     |
| .      | ENST0000. | 19p. | .   | .         | .          | .          | .   | . | . | . | .     |
| .      | ENST0000. | 19p. | .   | .         | Score      | rs1138422. | .   | . | . | . | .     |
| .      | ENST0000. | 19p. | .   | .         | Score.     | .          | .   | . | . | . | .     |
| USHBF  | ENST0000. | 19p. | .   | .         | rs9290443  | ID.        | .   | . | . | . | .     |
| GTPBF  | ENST0000. | 19p. | .   | .         | rs7698270. | .          | .   | . | . | . | .     |
| UNC13  | ENST0000. | 19p. | .   | .         | rs1043222. | .          | .   | . | . | . | .     |
| .      | ENST0000. | 19p. | .   | .         | Score.     | .          | .   | . | . | . | .     |
| .      | ENST0000. | 19p. | .   | .         | .          | .          | .   | . | . | . | .     |
| PDE4C  | ENST0000. | 19p. | .   | .         | .          | .          | .   | . | . | . | .     |
| UPF1:  | ENST0000. | 19p. | .   | .         | rs3719294. | .          | .   | . | . | . | .     |
| MAU2:  | ENST0000. | 19p. | .   | .         | rs2012753. | .          | .   | . | . | . | .     |
| ZNF90: | ENST0000. | 19p. | .   | .         | .          | .          | .   | . | . | . | .     |
| .      | ENST0000. | 19p. | .   | Score=0.9 | .          | .          | .   | . | . | . | .     |
| .      | ENST0000. | 19p. | .   | Score=0.9 | .          | .          | .   | . | . | . | .     |
| .      | ENST0000. | 19q. | .   | .         | Score.     | .          | .   | . | . | . | .     |
| TSHZ3  | ENST0000. | 19q. | Sc. | .         | rs7540203  | ID.        | .   | . | . | . | .     |
| KIAA03 | ENST0000. | 19q. | Sc. | .         | rs3754283. | .          | .   | . | . | . | .     |
| .      | ENST0000. | 19q. | .   | .         | .          | .          | .   | . | . | . | .     |
| .      | ENST0000. | 19q. | .   | .         | Score.     | .          | .   | . | . | . | .     |
| RBM42  | ENST0000. | 19q. | Sc. | .         | rs7656023. | .          | .   | . | . | . | .     |
| .      | ENST0000. | 19q. | .   | .         | .          | .          | .   | . | . | . | .     |
| .      | ENST0000. | 19q. | .   | .         | .          | .          | .   | . | . | . | .     |
| .      | ENST0000. | 19q. | .   | .         | Score      | rs5581240. | .   | . | . | . | .     |
| .      | .         | 19q. | .   | Score=0.9 | Score.     | .          | .   | . | . | . | .     |
| .      | .         | 19q. | .   | Score=0.9 | Score.     | rs4806419. | .   | . | . | . | .     |
| .      | .         | 19q. | .   | Score=0.9 | Score      | rs7125437. | .   | . | . | . | .     |
| .      | .         | 19q. | .   | Score=0.9 | Score.     | .          | .   | . | . | . | .     |
| .      | .         | 19q. | .   | .         | Score      | rs7728313. | .   | . | . | . | .     |
| UNKNC  | ENST0000. | 19q. | Sc. | .         | .          | .          | .   | . | . | . | .     |
| CATSP  | ENST0000. | 19q. | .   | .         | rs1476199  | ID.        | .   | . | . | . | .     |
| .      | ENST0000. | 19q. | .   | .         | Score.     | .          | .   | . | . | . | .     |
| .      | ENST0000. | 19q. | .   | .         | rs3756003. | .          | .   | . | . | . | 0.001 |
| .      | ENST0000. | 19q. | .   | .         | Score      | rs5371432. | .   | . | . | . | 0.003 |

|                   |      |     |            |                  |         |   |   |   |   |       |   |
|-------------------|------|-----|------------|------------------|---------|---|---|---|---|-------|---|
| . ENST0000.       | 19q. | .   | .          | .                | .       | . | . | . | . | .     | . |
| . ENST0000.       | 19q. | .   | .          | .                | .       | . | . | . | . | .     | . |
| . ENST0000.       | 19q. | .   | .          | Score rs5721273. | .       | . | . | . | . | 0.008 | . |
| UNKNC ENST0000.   | 19q. | .   | Score=0.9† | rs8917290.       | .       | . | . | . | . | .     | . |
| . ENST0000.       | 19q. | .   | Score=0.9† | .                | .       | . | . | . | . | .     | . |
| . ENST0000.       | 19q. | .   | .          | rs7564368 ID:    | .       | . | . | . | . | .     | . |
| UNKNC ENST0000.   | 19q. | Sc. | .          | rs7738579 ID:    | .       | . | . | . | . | .     | . |
| . ENST0000.       | 19q. | .   | Score=0.9† | .                | .       | . | . | . | . | .     | . |
| SHKBP ENST0000.   | 19q. | Sc. | .          | rs7469641.       | .       | . | . | . | . | .     | . |
| . ENST0000.       | 19q. | .   | .          | Score.           | .       | . | . | . | . | .     | . |
| . ENST0000.       | 19q. | .   | .          | .                | .       | . | . | . | . | .     | . |
| UNKNC ENST0000.   | 19q. | .   | .          | .                | .       | . | . | . | . | .     | . |
| UNKNC ENST0000.   | 19q. | Sc. | .          | .                | .       | . | . | . | . | .     | . |
| . ENST0000.       | 19q. | .   | .          | .                | .       | . | . | . | . | .     | . |
| C19orf1 ENST0000. | 19q. | .   | .          | rs1045293.       | .       | . | . | . | . | .     | . |
| UNKNC ENST0000.   | 19q. | .   | .          | .                | .       | . | . | . | . | .     | . |
| TGFB1 ENST0000.   | 19q. | .   | .          | .                | .       | . | . | . | . | .     | . |
| ARHGAP ENST0000.  | 19q. | .   | .          | .                | .       | . | . | . | . | .     | . |
| MEGF8 ENST0000.   | 19q. | Sc. | .          | .                | .       | . | . | . | . | .     | . |
| CEACPA ENST0000.  | 19q. | .   | .          | .                | .       | . | . | . | . | .     | . |
| . ENST0000.       | 19q. | .   | Score=0.9† | .                | .       | . | . | . | . | .     | . |
| . ENST0000.       | 19q. | .   | Score=0.9† | .                | .       | . | . | . | . | .     | . |
| IRGQ:1 ENST0000.  | 19q. | .   | .          | .                | .       | . | . | . | . | .     | . |
| . ENST0000.       | 19q. | .   | .          | .                | .       | . | . | . | . | .     | . |
| ZNF281 ENST0000.  | 19q. | .   | Score=0.9† | .                | .       | . | . | . | . | .     | . |
| UNKNC ENST0000.   | 19q. | .   | .          | rs7737032 ID:    | .       | . | . | . | . | .     | . |
| . ENST0000.       | 19q. | .   | .          | rs9075637.       | .       | . | . | . | . | .     | . |
| . ENST0000.       | 19q. | .   | .          | .                | .       | . | . | . | . | .     | . |
| . ENST0000.       | 19q. | .   | .          | Score rs5632226. | .       | . | . | . | . | .     | . |
| BCL3:1 ENST0000.  | 19q. | .   | .          | .                | .       | . | . | . | . | .     | . |
| BCAM:1 ENST0000.  | 19q. | .   | .          | .                | .       | . | . | . | . | .     | . |
| . ENST0000.       | 19q. | .   | .          | .                | .       | . | . | . | . | .     | . |
| GPR4:1 ENST0000.  | 19q. | Sc. | .          | .                | .       | . | . | . | . | .     | . |
| PRKD2 ENST0000.   | 19q. | .   | .          | rs1026645.       | .       | . | . | . | . | .     | . |
| STRN4 ENST0000.   | 19q. | Sc. | .          | rs3697415 ID:    | .       | . | . | . | . | .     | . |
| . ENST0000.       | 19q. | .   | .          | Score.           | .       | . | . | . | . | .     | . |
| . ENST0000.       | 19q. | .   | .          | .                | .       | . | . | . | . | .     | . |
| . ENST0000.       | 19q. | .   | .          | .                | .       | . | . | . | . | .     | . |
| . ENST0000.       | 19q. | .   | Score=0.9† | Score rs6213000. | .       | . | . | . | . | .     | . |
| SPHK2 ENST0000.   | 19q. | .   | .          | .                | .       | . | . | . | . | .     | . |
| . ENST0000.       | 19q. | .   | .          | rs1012379 ID:    | .       | . | . | . | . | .     | . |
| . ENST0000.       | 19q. | .   | .          | .                | .       | . | . | . | . | .     | . |
| . ENST0000.       | 19q. | .   | .          | .                | .       | . | . | . | . | .     | . |
| . ENST0000.       | 19q. | .   | .          | rs5626072.       | .       | . | . | . | . | .     | . |
| . ENST0000.       | 19q. | .   | .          | .                | .       | . | . | . | . | .     | . |
| . ENST0000.       | 19q. | .   | .          | rs7508901.       | .       | . | . | . | . | .     | . |
| MYH14 ENST0000.   | 19q. | .   | .          | rs3749564 ID:    | .       | . | . | . | . | .     | . |
| . ENST0000.       | 19q. | .   | .          | rs2001122.       | .       | . | . | . | . | 0.001 | . |
| . ENST0000.       | 19q. | .   | .          | .                | .       | . | . | . | . | .     | . |
| . ENST0000.       | 19q. | .   | .          | rs5643823.       | .       | . | . | . | . | .     | . |
| . ENST0000.       | 19q. | .   | .          | rs3695357.       | Likely. | . | . | . | . | .     | . |
| . ENST0000.       | 19q. | .   | .          | .                | .       | . | . | . | . | .     | . |
| MYBPC ENST0000.   | 19q. | .   | .          | rs7738602 ID:    | .       | . | . | . | . | .     | . |

|                      |      |     |            |        |               |   |   |   |       |
|----------------------|------|-----|------------|--------|---------------|---|---|---|-------|
| . ENST0000.          | 19q. | .   | .          | .      | .             | . | . | . | .     |
| GPR32 ENST0000.      | 19q. | .   | Score=0.90 | .      | .             | . | . | . | .     |
| ZNF810 ENST0000.     | 19q. | .   | .          | .      | .             | . | . | . | .     |
| ERVV-2 ENST0000.     | 19q. | .   | .          | Score. | .             | . | . | . | .     |
| VN1R4 ENST0000.      | 19q. | .   | .          | .      | rs1420234 ID. | . | . | . | .     |
| . ENST0000hsa-mir-52 | 19q. | .   | .          | .      | .             | . | . | . | .     |
| CACNC ENST0000.      | 19q. | .   | .          | .      | .             | . | . | . | .     |
| . ENST0000.          | 19q. | .   | .          | .      | .             | . | . | . | .     |
| . ENST0000.          | 19q. | .   | .          | .      | .             | . | . | . | .     |
| . ENST0000.          | 19q. | .   | Score=0.90 | .      | rs3704562.    | . | . | . | .     |
| . ENST0000.          | 19q. | .   | .          | .      | .             | . | . | . | .     |
| . ENST0000.          | 19q. | .   | .          | .      | rs7529171.    | . | . | . | .     |
| . ENST0000.          | 19q. | .   | .          | .      | .             | . | . | . | .     |
| TMEM1 ENST0000.      | 19q. | .   | .          | .      | rs3707427.    | . | . | . | .     |
| NLRP1 ENST0000.      | 19q. | .   | .          | .      | rs2000514.    | . | . | . | .     |
| PEG3:1 ENST0000.     | 19q. | .   | .          | .      | rs7704358 ID. | . | . | . | .     |
| . ENST0000.          | 19q. | .   | Score=0.90 | .      | .             | . | . | . | .     |
| . ENST0000.          | 19q. | .   | .          | .      | .             | . | . | . | .     |
| ZNF600 ENST0000.     | 19q. | .   | .          | .      | rs1474253.    | . | . | . | .     |
| . ENST0000.          | 19q. | .   | .          | .      | .             | . | . | . | .     |
| . ENST0000.          | 19q. | .   | .          | .      | rs3733248.    | . | . | . | .     |
| SIRPA: ENST0000.     | 20p. | .   | Score=0.90 | .      | rs1021538 ID. | . | . | . | .     |
| . ENST0000.          | 20p. | .   | .          | .      | rs7627114.    | . | . | . | .     |
| . ENST0000.          | 20p. | .   | .          | .      | .             | . | . | . | .     |
| . ENST0000.          | 20p. | .   | .          | Score  | rs8672082.    | . | . | . | .     |
| . ENST0000.          | 20p. | .   | .          | .      | .             | . | . | . | .     |
| ADAM3 ENST0000.      | 20p. | .   | .          | .      | rs7638624.    | . | . | . | .     |
| . ENST0000.          | 20p. | .   | .          | .      | .             | . | . | . | .     |
| . ENST0000.          | 20p. | .   | .          | Score  | rs1032256.    | . | . | . | .     |
| . ENST0000.          | 20p. | .   | .          | .      | .             | . | . | . | .     |
| CSRP2 ENST0000.      | 20p. | .   | .          | .      | .             | . | . | . | .     |
| . ENST0000.          | 20p. | .   | .          | Score. | .             | . | . | . | .     |
| CST4:1 ENST0000.     | 20p. | .   | Score=0.90 | .      | rs1509219 ID. | . | . | . | .     |
| . ENST0000.          | 20p. | .   | .          | .      | .             | . | . | . | .     |
| . ENST0000.          | 20p. | .   | Score=0.90 | .      | ID.           | . | . | . | .     |
| . ENST0000.          | 20q. | .   | Score=0.90 | .      | ID.           | . | . | . | .     |
| . ENST0000.          | 20q. | .   | Score=0.90 | .      | ID.           | . | . | . | .     |
| NOL4L ENST0000.      | 20q. | .   | .          | .      | rs1845841 ID. | . | . | . | 0.001 |
| . ENST0000.          | 20q. | .   | .          | .      | .             | . | . | . | .     |
| . ENST0000.          | 20q. | .   | .          | .      | .             | . | . | . | .     |
| . ENST0000.          | 20q. | .   | .          | Score. | .             | . | . | . | .     |
| . ENST0000.          | 20q. | .   | .          | .      | rs7460506 ID. | . | . | . | 0.001 |
| . ENST0000.          | 20q. | .   | .          | .      | .             | . | . | . | .     |
| NFS1:1 ENST0000.     | 20q. | Sc. | .          | .      | rs1480471.    | . | . | . | .     |
| . ENST0000.          | 20q. | .   | .          | Score  | rs5431099 ID. | . | . | . | .     |
| . ENST0000.          | 20q. | .   | .          | .      | .             | . | . | . | .     |
| . ENST0000.          | 20q. | .   | .          | .      | .             | . | . | . | .     |
| . ENST0000.          | 20q. | Sc. | .          | Score  | rs8798536.    | . | . | . | .     |
| . ENST0000.          | 20q. | .   | .          | .      | .             | . | . | . | .     |
| . ENST0000.          | 20q. | .   | .          | .      | rs9848856.    | . | . | . | .     |
| DHX35 ENST0000.      | 20q. | Sc. | .          | .      | rs9460302.    | . | . | . | .     |
| . ENST0000.          | 20q. | .   | .          | .      | rs3711048.    | . | . | . | 0.001 |
| TOP1:1 ENST0000.     | 20q. | .   | .          | .      | .             | . | . | . | .     |
| PLCG1 ENST0000.      | 20q. | Sc. | .          | .      | .             | . | . | . | .     |

|         |          |      |      |   |           |           |           |     |   |   |   |   |   |       |
|---------|----------|------|------|---|-----------|-----------|-----------|-----|---|---|---|---|---|-------|
| PTPRT   | ENST0000 | 20q. | .    | . | .         | .         | .         | .   | . | . | . | . | . | .     |
| PTPRT   | ENST0000 | 20q. | .    | . | .         | rs3761522 | ID:       | .   | . | . | . | . | . | .     |
| .       | ENST0000 | 20q. | .    | . | .         | .         | .         | .   | . | . | . | . | . | .     |
| .       | ENST0000 | 20q. | .    | . | .         | .         | .         | .   | . | . | . | . | . | .     |
| .       | ENST0000 | 20q. | .    | . | .         | Score.    | .         | .   | . | . | . | . | . | .     |
| .       | ENST0000 | 20q. | .    | . | .         | .         | .         | .   | . | . | . | . | . | .     |
| .       | ENST0000 | 20q. | .    | . | .         | .         | .         | .   | . | . | . | . | . | .     |
| ZMYN1   | ENST0000 | 20q. | Scc. | . | .         | .         | ID:       | .   | . | . | . | . | . | .     |
| KCNG1   | ENST0000 | 20q. | .    | . | .         | .         | ID:       | .   | . | . | . | . | . | .     |
| .       | ENST0000 | 20q. | .    | . | .         | .         | .         | .   | . | . | . | . | . | .     |
| .       | ENST0000 | 20q. | .    | . | .         | .         | .         | .   | . | . | . | . | . | .     |
| ZNF217  | ENST0000 | 20q. | .    | . | .         | rs8891302 | .         | .   | . | . | . | . | . | .     |
| .       | .        | 20q. | .    | . | .         | Score     | rs8669651 | .   | . | . | . | . | . | .     |
| GNAS1   | ENST0000 | 20q. | .    | . | .         | .         | .         | .   | . | . | . | . | . | .     |
| GNAS1   | ENST0000 | 20q. | .    | . | .         | .         | .         | .   | . | . | . | . | . | .     |
| .       | ENST0000 | 20q. | .    | . | .         | .         | .         | .   | . | . | . | . | . | .     |
| LSM14B  | ENST0000 | 20q. | .    | . | .         | rs7702464 | .         | .   | . | . | . | . | . | .     |
| .       | ENST0000 | 20q. | .    | . | .         | rs7787907 | .         | .   | . | . | . | . | . | .     |
| .       | ENST0000 | 20q. | .    | . | .         | rs1813756 | .         | .   | . | . | . | . | . | 0.002 |
| ARFGAP3 | ENST0000 | 20q. | Scc. | . | .         | rs1435421 | .         | .   | . | . | . | . | . | .     |
| .       | ENST0000 | 20q. | .    | . | .         | .         | .         | .   | . | . | . | . | . | .     |
| .       | ENST0000 | 20q. | .    | . | .         | .         | .         | .   | . | . | . | . | . | .     |
| ABHD1   | ENST0000 | 20q. | .    | . | .         | rs5462318 | ID:       | .   | . | . | . | . | . | .     |
| .       | ENST0000 | 21p. | .    | . | Score=0.9 | rs7962225 | .         | .   | . | . | . | . | . | .     |
| .       | .        | 21p. | .    | . | Score=0.9 | .         | .         | .   | . | . | . | . | . | .     |
| .       | .        | 21p. | .    | . | Score=0.9 | Score.    | .         | .   | . | . | . | . | . | .     |
| .       | .        | 21p. | .    | . | Score=0.9 | Score.    | .         | .   | . | . | . | . | . | .     |
| .       | ENST0000 | 21p. | .    | . | Score=0.9 | Score     | rs8680295 | .   | . | . | . | . | . | .     |
| .       | ENST0000 | 21p. | .    | . | Score=0.9 | Score     | rs3711086 | .   | . | . | . | . | . | .     |
| .       | .        | 21p. | .    | . | Score=0.9 | .         | rs3775054 | ID: | . | . | . | . | . | .     |
| .       | ENST0000 | 21p. | .    | . | Score=0.9 | Score.    | .         | .   | . | . | . | . | . | .     |
| UNKNC   | ENST0000 | 21p. | .    | . | Score=0.9 | .         | .         | .   | . | . | . | . | . | .     |
| .       | ENST0000 | 21p. | .    | . | Score=0.9 | .         | rs5282430 | .   | . | . | . | . | . | .     |
| .       | .        | 21p. | .    | . | Score=0.9 | Score.    | .         | .   | . | . | . | . | . | .     |
| .       | .        | 21p. | .    | . | Score=0.9 | Score     | rs665796  | .   | . | . | . | . | . | .     |
| .       | .        | 21p. | .    | . | Score=0.9 | Score     | rs6582845 | ID: | . | . | . | . | . | .     |
| .       | ENST0000 | 21p. | .    | . | Score=0.9 | .         | rs915519  | ID: | . | . | . | . | . | .     |
| .       | ENST0000 | 21q. | .    | . | Score=0.9 | Score.    | .         | .   | . | . | . | . | . | .     |
| .       | ENST0000 | 21q. | .    | . | Score=0.9 | .         | .         | ID: | . | . | . | . | . | .     |
| .       | ENST0000 | 21q. | .    | . | Score.    | .         | .         | .   | . | . | . | . | . | .     |
| .       | ENST0000 | 21q. | .    | . | .         | .         | .         | .   | . | . | . | . | . | .     |
| .       | ENST0000 | 21q. | .    | . | .         | .         | .         | .   | . | . | . | . | . | .     |
| .       | ENST0000 | 21q. | .    | . | .         | .         | rs9172671 | .   | . | . | . | . | . | .     |
| KRTAP2  | ENST0000 | 21q. | .    | . | .         | .         | .         | .   | . | . | . | . | . | .     |
| .       | ENST0000 | 21q. | .    | . | Score.    | .         | .         | .   | . | . | . | . | . | .     |
| .       | ENST0000 | 21q. | .    | . | .         | .         | .         | .   | . | . | . | . | . | .     |
| SYNJ1   | ENST0000 | 21q. | .    | . | .         | .         | rs1034062 | .   | . | . | . | . | . | .     |
| OLIG1   | ENST0000 | 21q. | Scc. | . | Score.    | .         | .         | .   | . | . | . | . | . | .     |
| .       | ENST0000 | 21q. | .    | . | .         | .         | rs7587939 | .   | . | . | . | . | . | .     |
| .       | ENST0000 | 21q. | .    | . | .         | .         | .         | .   | . | . | . | . | . | .     |
| .       | ENST0000 | 21q. | .    | . | Score.    | .         | .         | .   | . | . | . | . | . | .     |
| .       | ENST0000 | 21q. | .    | . | .         | .         | .         | .   | . | . | . | . | . | .     |
| .       | ENST0000 | 21q. | Scc. | . | Score     | rs5585229 | .         | .   | . | . | . | . | . | .     |
| .       | ENST0000 | 21q. | .    | . | .         | .         | rs7591033 | .   | . | . | . | . | . | .     |

|       |          |      |    |           |   |                        |   |   |       |
|-------|----------|------|----|-----------|---|------------------------|---|---|-------|
| BRWD  | ENST0000 | 21q. | .  | .         | . | rs7585989 ID           | . | . | .     |
| .     | ENST0000 | 21q. | .  | .         | . | .                      | . | . | .     |
| DSCAM | ENST0000 | 21q. | Sc | .         | . | .                      | . | . | .     |
| DSCAM | ENST0000 | 21q. | Sc | .         | . | .                      | . | . | .     |
| DSCAM | ENST0000 | 21q. | .  | .         | . | ID                     | . | . | .     |
| DSCAM | ENST0000 | 21q. | .  | .         | . | .                      | . | . | .     |
| .     | ENST0000 | 21q. | .  | .         | . | .                      | . | . | .     |
| .     | ENST0000 | 21q. | .  | .         | . | .                      | . | . | .     |
| .     | ENST0000 | 21q. | .  | .         | . | Score rs9464977        | . | . | .     |
| ZBTB2 | ENST0000 | 21q. | Sc | .         | . | .                      | . | . | .     |
| .     | ENST0000 | 21q. | .  | .         | . | .                      | . | . | .     |
| .     | ENST0000 | 21q. | .  | .         | . | rs1014361              | . | . | .     |
| .     | ENST0000 | 21q. | .  | .         | . | rs7806447              | . | . | .     |
| PWP2  | ENST0000 | 21q. | Sc | .         | . | rs5662670              | . | . | .     |
| .     | ENST0000 | 21q. | .  | .         | . | rs9852755              | . | . | .     |
| ITGB2 | ENST0000 | 21q. | Sc | .         | . | rs7565454              | . | . | .     |
| SLC19 | ENST0000 | 21q. | .  | .         | . | rs7582548 ID           | . | . | .     |
| .     | ENST0000 | 21q. | .  | .         | . | rs3771590              | . | . | .     |
| .     | ENST0000 | 21q. | .  | .         | . | .                      | . | . | .     |
| .     | ENST0000 | 21q. | .  | .         | . | .                      | . | . | .     |
| PCNT  | ENST0000 | 21q. | .  | .         | . | rs7517144              | . | . | .     |
| DIP2A | ENST0000 | 21q. | .  | .         | . | .                      | . | . | .     |
| .     | ENST0000 | 22q. | .  | .         | . | Score=0.9 rs2845112 ID | . | . | .     |
| .     | ENST0000 | 22q. | .  | .         | . | Score=0.9 rs8790424    | . | . | .     |
| .     | ENST0000 | 22q. | .  | .         | . | Score=0.9              | . | . | .     |
| .     | ENST0000 | 22q. | .  | .         | . | Score=0.9 rs1248470 ID | . | . | .     |
| .     | ENST0000 | 22q. | .  | .         | . | .                      | . | . | .     |
| DGCR2 | ENST0000 | 22q. | .  | .         | . | rs5555078              | . | . | .     |
| .     | ENST0000 | 22q. | .  | .         | . | Score                  | . | . | .     |
| .     | ENST0000 | 22q. | .  | .         | . | Score=0.9 rs1899538    | . | . | .     |
| .     | ENST0000 | 22q. | .  | .         | . | Score=0.9              | . | . | .     |
| .     | ENST0000 | 22q. | .  | .         | . | .                      | . | . | .     |
| PI4KA | ENST0000 | 22q. | Sc | Score=0.9 | . | rs3714923              | . | . | .     |
| HIC2  | ENST0000 | 22q. | .  | .         | . | rs7724279              | . | . | .     |
| .     | ENST0000 | 22q. | .  | .         | . | Score=0.9              | . | . | .     |
| .     | ENST0000 | 22q. | .  | .         | . | rs3777336              | . | . | .     |
| .     | ENST0000 | 22q. | .  | .         | . | rs3681295              | . | . | 0.001 |
| SUSD2 | ENST0000 | 22q. | .  | .         | . | .                      | . | . | .     |
| ADOR  | ENST0000 | 22q. | .  | .         | . | .                      | . | . | .     |
| .     | ENST0000 | 22q. | .  | .         | . | .                      | . | . | .     |
| GGT1  | ENST0000 | 22q. | .  | .         | . | Score=0.9 rs7723316    | . | . | .     |
| .     | ENST0000 | 22q. | .  | .         | . | Score=0.9              | . | . | .     |
| .     | ENST0000 | 22q. | .  | .         | . | .                      | . | . | .     |
| .     | ENST0000 | 22q. | .  | .         | . | rs1925641              | . | . | .     |
| .     | ENST0000 | 22q. | .  | .         | . | .                      | . | . | .     |
| .     | ENST0000 | 22q. | .  | .         | . | .                      | . | . | .     |
| .     | ENST0000 | 22q. | .  | .         | . | rs5710568              | . | . | .     |
| .     | ENST0000 | 22q. | .  | .         | . | rs1015431              | . | . | .     |
| SFI1  | ENST0000 | 22q. | .  | .         | . | .                      | . | . | .     |
| .     | .        | 22q. | .  | .         | . | Score=0.9              | . | . | .     |
| .     | ENST0000 | 22q. | .  | .         | . | .                      | . | . | .     |
| .     | ENST0000 | 22q. | .  | .         | . | .                      | . | . | .     |
| MCM5  | ENST0000 | 22q. | .  | .         | . | rs1379196 ID           | . | . | .     |
| .     | ENST0000 | 22q. | .  | .         | . | .                      | . | . | .     |

|                  |      |     |             |                  |   |   |       |
|------------------|------|-----|-------------|------------------|---|---|-------|
| CSF2R ENST0000.  | 22q. | .   | .           | rs3682304.       | . | . | 0.001 |
| . ENST0000.      | 22q. | .   | .           | rs5367410.       | . | . | .     |
| PLA2G ENST0000.  | 22q. | Sc. | .           | .                | . | . | .     |
| . ENST0000.      | 22q. | .   | .           | .                | . | . | .     |
| . ENST0000.      | 22q. | .   | .           | rs7523833.       | . | . | .     |
| KCNJ4 ENST0000.  | 22q. | Sc. | .           | ID.              | . | . | .     |
| KCNJ4 ENST0000.  | 22q. | Sc. | .           | ID.              | . | . | .     |
| . ENST0000.      | 22q. | .   | .           | rs5714435.       | . | . | 0.001 |
| APOBE ENST0000.  | 22q. | .   | Score=0.90. | .                | . | . | .     |
| . ENST0000.      | 22q. | .   | .           | Score rs3719126. | . | . | 0.005 |
| TNRC6 ENST0000.  | 22q. | .   | .           | .                | . | . | .     |
| MCHR' ENST0000.  | 22q. | .   | .           | rs2016059.       | . | . | .     |
| POLR3 ENST0000.  | 22q. | Sc. | .           | .                | . | . | .     |
| POLR3 ENST0000.  | 22q. | .   | .           | rs1838128.       | . | . | .     |
| . ENST0000.      | 22q. | .   | .           | .                | . | . | .     |
| . ENST0000.      | 22q. | .   | Score=0.90. | .                | . | . | .     |
| . ENST0000.      | 22q. | .   | .           | rs1916812 ID.    | . | . | .     |
| . ENST0000.      | 22q. | .   | .           | .                | . | . | .     |
| . ENST0000.      | 22q. | Sc. | .           | rs5584935.       | . | . | 0.001 |
| . ENST0000.      | 22q. | .   | .           | rs1305515 ID.    | . | . | .     |
| . ENST0000.      | 22q. | .   | .           | .                | . | . | .     |
| . ENST0000.      | 22q. | .   | .           | .                | . | . | .     |
| PKDRE ENST0000.  | 22q. | .   | .           | .                | . | . | .     |
| CELSR ENST0000.  | 22q. | .   | .           | .                | . | . | .     |
| . ENST0000.      | 22q. | .   | .           | .                | . | . | .     |
| . ENST0000.      | 22q. | .   | .           | .                | . | . | .     |
| MOV1C ENST0000.  | 22q. | Sc. | .           | rs5595729.       | . | . | .     |
| . ENST0000.      | 22q. | .   | .           | .                | . | . | .     |
| PANX2 ENST0000.  | 22q. | Sc. | .           | .                | . | . | .     |
| PLXNB ENST0000.  | 22q. | .   | .           | rs3705843.       | . | . | 0.001 |
| . ENST0000.      | 22q. | .   | Score=0.80. | .                | . | . | .     |
| NCAPF ENST0000.  | 22q. | Sc. | .           | ID.              | . | . | .     |
| . ENST0000.      | 22q. | .   | .           | rs9805300.       | . | . | .     |
| . ENST0000.      | Xp2. | .   | Score=0.90. | .                | . | . | .     |
| . ENST0000.      | Xp2. | .   | Score=0.90. | .                | . | . | .     |
| . ENST0000.      | Xp2. | .   | Score=0.90. | .                | . | . | .     |
| . ENST0000.      | Xp2. | .   | Score.      | .                | . | . | .     |
| LOC10 ENST0000.  | Xp2. | .   | .           | .                | . | . | .     |
| . ENST0000.      | Xp2. | .   | .           | .                | . | . | .     |
| . ENST0000.      | Xp2. | .   | .           | .                | . | . | .     |
| NHS:NI ENST0000. | Xp2. | Sc. | .           | .                | . | . | .     |
| . ENST0000.      | Xp2. | Sc. | .           | .                | . | . | .     |
| APOO: ENST0000.  | Xp2. | .   | .           | rs3730298.       | . | . | .     |
| ARX:NI ENST0000. | Xp2. | .   | .           | .                | . | . | .     |
| . ENST0000.      | Xp2. | .   | Score.      | .                | . | . | .     |
| . ENST0000.      | Xp2. | .   | .           | .                | . | . | .     |
| . ENST0000.      | Xp2. | .   | .           | .                | . | . | .     |
| MAGEF ENST0000.  | Xp2. | .   | .           | .                | . | . | .     |
| . ENST0000.      | Xp2. | .   | .           | .                | . | . | .     |
| . ENST0000.      | Xp2. | .   | .           | .                | . | . | .     |
| . ENST0000.      | Xp2. | .   | .           | .                | . | . | .     |
| . ENST0000.      | Xp2. | .   | .           | .                | . | . | .     |
| . ENST0000.      | Xp1. | .   | .           | .                | . | . | .     |



|        |           |      |           |                    |                 |   |   |       |       |
|--------|-----------|------|-----------|--------------------|-----------------|---|---|-------|-------|
| .      | ENST0000. | Xq2. | Score=0.9 | .                  | .               | . | . | .     | .     |
| .      | ENST0000. | Xq2. | .         | .                  | rs1507941       | . | . | .     | .     |
| .      | ENST0000. | Xq2. | .         | .                  | .               | . | . | .     | .     |
| .      | ENST0000. | Xq2. | .         | .                  | .               | . | . | .     | .     |
| .      | ENST0000. | Xq2. | .         | .                  | Score rs8664003 | . | . | .     | .     |
| .      | ENST0000. | Xq2. | .         | .                  | .               | . | . | .     | .     |
| .      | ENST0000. | Xq2. | .         | .                  | Score.          | . | . | .     | .     |
| .      | ENST0000. | Xq2. | .         | .                  | .               | . | . | .     | .     |
| ACTRT  | ENST0000. | Xq2. | .         | .                  | rs1387255 ID    | . | . | .     | .     |
| .      | ENST0000. | Xq2. | .         | .                  | .               | . | . | .     | .     |
| .      | ENST0000. | Xq2. | .         | .                  | .               | . | . | .     | .     |
| .      | ENST0000. | Xq2. | .         | .                  | .               | . | . | .     | .     |
| .      | ENST0000. | Xq2. | .         | .                  | .               | . | . | .     | .     |
| ATP11  | ENST0000. | Xq2. | .         | .                  | .               | . | . | .     | .     |
| .      | ENST0000. | Xq2. | Score=0.9 | Score.             | ID.             | . | . | .     | .     |
| MAGE/  | ENST0000. | Xq2. | .         | .                  | .               | . | . | .     | .     |
| .      | ENST0000. | Xq2. | Score=0.9 | .                  | rs7823749 ID    | . | . | .     | .     |
| CNGA2  | ENST0000. | Xq2. | .         | .                  | .               | . | . | .     | .     |
| .      | ENST0000. | Xq2. | .         | .                  | rs3712627       | . | . | .     | .     |
| BGN:N  | ENST0000. | Xq2. | Sc        | .                  | .               | . | . | .     | .     |
| .      | ENST0000. | Xq2. | .         | .                  | .               | . | . | .     | .     |
| .      | ENST0000. | Xq2. | .         | .                  | rs7825278       | . | . | .     | .     |
| .      | ENST0000. | Xq2. | .         | .                  | .               | . | . | .     | .     |
| .      | ENST0000. | Xq2. | .         | .                  | .               | . | . | .     | .     |
| .      | ENST0000. | Xq2. | .         | .                  | .               | . | . | .     | .     |
| .      | ENST0000. | Xq2. | .         | .                  | .               | . | . | .     | .     |
| SLC10/ | ENST0000. | Xq2. | .         | .                  | .               | . | . | .     | .     |
| G6PD:† | ENST0000. | Xq2. | .         | .                  | rs7819487 ID    | . | . | .     | .     |
| .      | ENST0000. | Xq2. | .         | .                  | .               | . | . | .     | .     |
| .      | ENST0000. | Xq2. | .         | .                  | .               | . | . | .     | .     |
| .      | ENST0000. | Xq2. | .         | .                  | .               | . | . | .     | .     |
| TMLHE  | ENST0000. | Xq2. | .         | .                  | .               | . | . | .     | .     |
| .      | .         | Yq1. | Score=0.9 | .                  | .               | . | . | .     | .     |
| .      | .         | .    | .         | .                  | rs8791767       | . | . | .     | .     |
| .      | .         | .    | .         | .                  | .               | . | . | .     | .     |
| .      | .         | .    | .         | .                  | .               | . | . | .     | .     |
| .      | ENST0000. | 1p3. | .         | .                  | rs5750552       | . | . | 0     | .     |
| .      | ENST0000. | 1p3. | Score=0.9 | .                  | rs4101081       | . | . | .     | .     |
| .      | ENST0000. | 1p3. | Score=0.9 | .                  | rs7629862 ID    | . | . | .     | .     |
| .      | ENST0000. | 1p3. | Score=0.9 | Score.             | .               | . | . | .     | .     |
| EIF4G3 | ENST0000. | 1p3. | Sc        | .                  | .               | . | . | .     | .     |
| .      | .         | 1q2. | Score=0.9 | .                  | rs3772379       | . | . | .     | .     |
| .      | ENST0000. | 1q2. | Score=0.9 | Score rs3720400    | .               | . | . | .     | .     |
| .      | ENST0000. | 1q2. | Score=0.9 | Score rs6181337    | .               | . | . | .     | .     |
| .      | ENST0000. | 1q4. | .         | .                  | .               | . | . | .     | .     |
| .      | ENST0000. | 2p1. | .         | .                  | .               | . | . | .     | .     |
| .      | .         | 2p1. | Score=0.9 | Score rs1649505    | .               | . | . | .     | .     |
| EPHA6  | ENST0000. | 3q1. | .         | .                  | rs7933313       | . | . | 0.002 | 0.001 |
| COL6A  | ENST0000. | 3q2. | .         | .                  | rs7480655 ID    | . | . | .     | .     |
| TOPBF  | ENST0000. | 3q2. | .         | .                  | .               | . | . | .     | .     |
| .      | ENST0000. | 4p1. | Score=0.9 | .                  | .               | . | . | .     | .     |
| .      | ENST0000. | 5p1. | Score=0.9 | .                  | rs671688        | . | . | .     | .     |
| .      | ENST0000. | 5p1. | Score=0.9 | Score rs8681576 ID | .               | . | . | .     | .     |
| CLK4:† | ENST0000. | 5q3. | .         | .                  | .               | . | . | .     | .     |





|         |           |      |     |           |                 |            |   |       |       |
|---------|-----------|------|-----|-----------|-----------------|------------|---|-------|-------|
| ABCG5   | ENST0000. | 2p2. | .   | .         | rs1420196       | .          | . | .     | .     |
| .       | ENST0000. | 2q2. | .   | .         | .               | .          | . | .     | .     |
| TANC1   | ENST0000. | 2q2. | .   | .         | .               | .          | . | .     | .     |
| SLC39A1 | ENST0000. | 2q3. | Sc. | .         | .               | .          | . | .     | .     |
| .       | ENST0000. | 2q3. | .   | Score=0.9 | rs1857895       | .          | . | 0     | 0.003 |
| .       | ENST0000. | 2q3. | .   | .         | .               | .          | . | .     | .     |
| .       | ENST0000. | 2q3. | .   | .         | .               | .          | . | .     | .     |
| MROH2   | ENST0000. | 2q3. | .   | .         | .               | .          | . | .     | .     |
| STK25   | ENST0000. | 2q3. | .   | .         | rs7784676       | .          | . | .     | .     |
| .       | ENST0000. | 3p2. | .   | .         | .               | .          | . | .     | .     |
| .       | ENST0000. | 3q1. | .   | .         | .               | .          | . | .     | .     |
| CEP63   | ENST0000. | 3q2. | .   | .         | .               | .          | . | .     | .     |
| CEP63   | ENST0000. | 3q2. | Sc. | .         | .               | .          | . | .     | .     |
| .       | ENST0000. | 3q2. | .   | .         | .               | .          | . | .     | .     |
| GOLIM   | ENST0000. | 3q2. | .   | .         | rs7462149       | ID.        | . | .     | .     |
| .       | ENST0000. | 3q2. | .   | .         | .               | .          | . | .     | .     |
| PIK3CA  | ENST0000. | 3q2. | .   | Score=0.9 | rs1048860       | ID: Patho. | . | .     | .     |
| YEATS   | ENST0000. | 3q2. | Sc. | .         | .               | .          | . | .     | .     |
| .       | ENST0000. | 4p1. | .   | .         | .               | .          | . | .     | .     |
| SMARCA4 | ENST0000. | 4q2. | .   | .         | .               | .          | . | .     | .     |
| .       | ENST0000. | 4q2. | .   | Score.    | .               | .          | . | .     | .     |
| NAA15   | ENST0000. | 4q3. | Sc. | .         | .               | .          | . | .     | .     |
| INPP4B  | ENST0000. | 4q3. | .   | .         | .               | .          | . | .     | .     |
| .       | .         | 4q3. | .   | .         | .               | .          | . | .     | .     |
| .       | ENST0000. | 5p1. | .   | .         | Score rs1876921 | ID.        | . | .     | .     |
| RNF181  | ENST0000. | 5q1. | Sc. | .         | .               | .          | . | .     | .     |
| F2R1    | ENST0000. | 5q1. | .   | .         | .               | .          | . | .     | .     |
| SEC24L  | ENST0000. | 5q3. | .   | .         | rs7956159       | ID.        | . | 0.033 | 0.031 |
| FAM71   | ENST0000. | 5q3. | .   | .         | .               | .          | . | .     | .     |
| HMMR    | ENST0000. | 5q3. | .   | .         | .               | .          | . | .     | .     |
| KCNIP1  | ENST0000. | 5q3. | .   | .         | .               | ID.        | . | .     | .     |
| .       | ENST0000. | 6p2. | .   | .         | .               | .          | . | .     | .     |
| SYCP2   | ENST0000. | 6p2. | .   | .         | .               | .          | . | .     | .     |
| .       | ENST0000. | 6p2. | .   | .         | .               | .          | . | .     | .     |
| .       | ENST0000. | 6p2. | .   | Score=0.9 | rs1787910       | .          | . | 0.309 | 0.277 |
| .       | ENST0000. | 6p2. | .   | .         | rs5364899       | .          | . | 0.003 | 0.003 |
| EYS1    | ENST0000. | 6q1. | .   | .         | .               | .          | . | .     | .     |
| EYS1    | ENST0000. | 6q1. | Sc. | .         | .               | .          | . | .     | .     |
| .       | ENST0000. | 6q2. | .   | .         | .               | .          | . | .     | .     |
| .       | ENST0000. | 6q2. | .   | .         | .               | .          | . | .     | .     |
| .       | ENST0000. | 7p2. | .   | Score=0.9 | .               | .          | . | .     | .     |
| .       | .         | 7q1. | .   | Score=0.9 | .               | .          | . | .     | .     |
| .       | ENST0000. | 7q2. | .   | .         | .               | .          | . | .     | .     |
| .       | ENST0000. | 7q3. | .   | .         | .               | .          | . | .     | .     |
| .       | ENST0000. | 7q3. | .   | .         | rs3685111       | .          | . | .     | .     |
| .       | ENST0000. | 8p1. | .   | .         | .               | .          | . | .     | .     |
| PREX2   | ENST0000. | 8q1. | .   | .         | .               | .          | . | .     | .     |
| .       | ENST0000. | 8q2  | Sc. | .         | .               | .          | . | .     | .     |
| NAPRT   | ENST0000. | 8q2. | .   | .         | .               | .          | . | .     | .     |
| PLEC1   | ENST0000. | 8q2. | Sc. | .         | rs3743103       | ID.        | . | .     | .     |
| .       | .         | 9q1. | .   | Score=0.8 | rs4928838       | ID.        | . | .     | .     |
| .       | .         | 9q2. | .   | .         | .               | .          | . | .     | .     |
| PHF21   | ENST0000. | 9q2. | .   | .         | .               | .          | . | .     | .     |
| .       | ENST0000. | 9q3. | .   | .         | .               | .          | . | .     | .     |

|                   |      |                  |                      |   |   |   |       |       |   |
|-------------------|------|------------------|----------------------|---|---|---|-------|-------|---|
| . ENST0000.       | 9q3. | .                | .                    | . | . | . | .     | .     | . |
| DIP2C: ENST0000.  | 10p. | .                | .                    | . | . | . | .     | .     | . |
| . ENST0000.       | 10p. | .                | .                    | . | . | . | .     | .     | . |
| . ENST0000.       | 10q. | Score=0.9(       | rs3128226.           | . | . | . | 0.527 | 0.524 | . |
| . ENST0000.       | 10q. | .                | .                    | . | . | . | .     | .     | . |
| . ENST0000.       | 11p. | Score=0.9(       | .                    | . | . | . | .     | .     | . |
| . ENST0000.       | 11p. | .                | .                    | . | . | . | .     | .     | . |
| GYLTL ENST0000.   | 11p. | .                | .                    | . | . | . | .     | .     | . |
| . ENST0000.       | 11q. | .                | .                    | . | . | . | .     | .     | . |
| TENM4 ENST0000.   | 11q. | .                | .                    | . | . | . | .     | .     | . |
| . ENST0000.       | 11q. | .                | .                    | . | . | . | .     | .     | . |
| . ENST0000.       | 11q. | .                | .                    | . | . | . | .     | .     | . |
| . ENST0000.       | 12p. | Score=0.9(       | rs5382343 ID:        | . | . | . | 0.402 | 0.375 | . |
| ATF7IF ENST0000.  | 12p. | Sc.              | .                    | . | . | . | .     | .     | . |
| SMCO2 ENST0000.   | 12p. | .                | .                    | . | . | . | .     | .     | . |
| . ENST0000.       | 12q. | .                | rs8658204 ID:        | . | . | . | .     | .     | . |
| . ENST0000.       | 12q. | Score.           | .                    | . | . | . | .     | .     | . |
| NAA25 ENST0000.   | 12q. | .                | .                    | . | . | . | .     | .     | . |
| NOS1: ENST0000.   | 12q. | .                | rs7707492.           | . | . | . | .     | .     | . |
| . ENST0000.       | 13q. | .                | .                    | . | . | . | .     | .     | . |
| FRY:NI ENST0000.  | 13q. | .                | rs3702294.           | . | . | . | 0.    | .     | . |
| FREM2 ENST0000.   | 13q. | .                | rs4129275 ID: Uncer. | . | . | . | 0.    | .     | . |
| FREM2 ENST0000.   | 13q. | .                | .                    | . | . | . | .     | .     | . |
| PCDH2 ENST0000.   | 13q. | .                | ID:                  | . | . | . | .     | .     | . |
| . ENST0000.       | 13q. | .                | .                    | . | . | . | .     | .     | . |
| SLAIN1 ENST0000.  | 13q. | .                | .                    | . | . | . | .     | .     | . |
| CCDC1 ENST0000.   | 13q. | .                | .                    | . | . | . | .     | .     | . |
| . ENST0000.       | 14q. | .                | rs3699116.           | . | . | . | .     | .     | . |
| . ENST0000.       | 14q. | Score rs7660001: | .                    | . | . | . | .     | .     | . |
| BTBD7 ENST0000.   | 14q. | Sc.              | .                    | . | . | . | .     | .     | . |
| . ENST0000.       | 14q. | .                | .                    | . | . | . | .     | .     | . |
| AKT1:NI ENST0000. | 14q. | .                | rs1214345 ID: Patho. | . | . | . | .     | .     | . |
| . ENST0000.       | 14q. | Score=0.9(       | .                    | . | . | . | .     | .     | . |
| . ENST0000.       | 15q. | Score=0.9(       | rs4932010 ID:        | . | . | . | .     | .     | . |
| . ENST0000.       | 15q. | Score=0.9(       | Score rs7494426.     | . | . | . | .     | .     | . |
| . ENST0000.       | 15q. | Score=0.9(       | rs1079463 ID:        | . | . | . | .     | .     | . |
| . ENST0000.       | 15q. | Score=0.9(       | Score rs1823548.     | . | . | . | 0.086 | 0.088 | . |
| . ENST0000.       | 15q. | .                | .                    | . | . | . | .     | .     | . |
| . ENST0000.       | 15q. | Score rs1861770. | .                    | . | . | . | 0.003 | 0.002 | . |
| PATL2: ENST0000.  | 15q. | .                | rs9953164 ID:        | . | . | . | .     | .     | . |
| . ENST0000.       | 15q. | Score.           | .                    | . | . | . | .     | .     | . |
| . ENST0000.       | 15q. | .                | .                    | . | . | . | .     | .     | . |
| . ENST0000.       | 15q. | Score=0.8(       | Score.               | . | . | . | .     | .     | . |
| CCDC6 ENST0000.   | 16p. | .                | ID:                  | . | . | . | .     | .     | . |
| . ENST0000.       | 16p. | Score=0.9(       | .                    | . | . | . | .     | .     | . |
| OGFOI ENST0000.   | 16q. | .                | rs7759203.           | . | . | . | .     | .     | . |
| . ENST0000.       | 16q. | Score.           | .                    | . | . | . | .     | .     | . |
| C17orf ENST0000.  | 17p. | .                | .                    | . | . | . | .     | .     | . |
| GPR17 ENST0000.   | 17q. | .                | rs7810711 ID:        | . | . | . | .     | .     | . |
| DBF4B ENST0000.   | 17q. | .                | rs1509595.           | . | . | . | 0.    | .     | . |
| HOXB8 ENST0000.   | 17q. | .                | .                    | . | . | . | .     | .     | . |
| . ENST0000.       | 17q. | .                | rs3742496.           | . | . | . | 0.002 | 0.002 | . |
| . ENST0000.       | 17q. | .                | rs5611679.           | . | . | . | .     | .     | . |

|       |           |      |           |           |     |   |   |             |
|-------|-----------|------|-----------|-----------|-----|---|---|-------------|
| NOTUM | ENST0000. | 17q. | Sc.       | rs5502840 | .   | . | . | 0.          |
| .     | ENST0000. | 18p. | Score=0.9 | rs1996954 | ID: | . | . | .           |
| .     | ENST0000. | 18q. | .         | .         | .   | . | . | .           |
| .     | ENST0000. | 19p. | .         | .         | .   | . | . | .           |
| .     | ENST0000. | 19p. | .         | .         | .   | . | . | .           |
| SUGP1 | ENST0000. | 19p. | Sc.       | .         | .   | . | . | .           |
| ZNF50 | ENST0000. | 19p. | Score=0.8 | .         | .   | . | . | .           |
| .     | ENST0000. | 19q. | .         | .         | .   | . | . | .           |
| ZNF56 | ENST0000. | 19q. | .         | .         | .   | . | . | .           |
| TTC9B | ENST0000. | 19q. | .         | .         | ID: | . | . | .           |
| .     | ENST0000. | 19q. | Score=0.9 | .         | .   | . | . | .           |
| .     | ENST0000. | 19q. | .         | .         | .   | . | . | .           |
| .     | ENST0000. | 20p. | .         | .         | .   | . | . | .           |
| TGM6  | ENST0000. | 20p. | .         | .         | .   | . | . | .           |
| CDS2  | ENST0000. | 20p. | Sc.       | rs1438597 | .   | . | . | .           |
| .     | ENST0000. | 20q. | .         | .         | .   | . | . | .           |
| .     | ENST0000. | 20q. | Score.    | .         | .   | . | . | .           |
| .     | ENST0000. | 21p. | Score=0.9 | rs1170118 | ID: | . | . | .           |
| USP25 | ENST0000. | 21q. | .         | .         | .   | . | . | .           |
| .     | ENST0000. | 22q. | .         | .         | .   | . | . | .           |
| OSBP2 | ENST0000. | 22q. | .         | .         | .   | . | . | .           |
| EIF3L | ENST0000. | 22q. | Sc.       | .         | .   | . | . | .           |
| ARSF  | ENST0000. | Xp2. | .         | rs7509188 | ID: | . | . | .           |
| ARX   | ENST0000. | Xp2. | Sc.       | .         | .   | . | . | .           |
| .     | ENST0000. | Xp1. | Score=0.9 | .         | .   | . | . | .           |
| KIF4A | ENST0000. | Xq1. | .         | .         | .   | . | . | .           |
| NKAP  | ENST0000. | Xq2. | Sc.       | .         | .   | . | . | .           |
| .     | .         | Xq2. | .         | .         | .   | . | . | .           |
| .     | .         | Xq2. | .         | .         | .   | . | . | .           |
| .     | .         | Xq2. | .         | .         | .   | . | . | .           |
| .     | ENST0000. | Xq2. | Sc.       | .         | .   | . | . | .           |
| .     | ENST0000. | Xq2. | .         | .         | .   | . | . | .           |
| .     | .         | .    | .         | .         | .   | . | . | .           |
| .     | ENST0000. | 1p3. | Score=0.9 | rs1149286 | .   | . | . | .           |
| TMEM  | ENST0000. | 1p3. | Sc.       | .         | .   | . | . | .           |
| .     | ENST0000. | 1p3. | .         | .         | .   | . | . | .           |
| COL24 | ENST0000. | 1p2. | Sc.       | .         | .   | . | . | .           |
| .     | ENST0000. | 1p1. | Score=0.9 | rs1998147 | .   | . | . | .           |
| .     | ENST0000. | 1q2. | Score=0.9 | rs8662584 | ID: | . | . | .           |
| .     | ENST0000. | 2p1. | .         | .         | .   | . | . | .           |
| ETAA1 | ENST0000. | 2p1. | .         | .         | .   | . | . | .           |
| .     | ENST0000. | 2p1. | .         | .         | .   | . | . | .           |
| GLI2  | ENST0000. | 2q1. | .         | rs3708851 | .   | . | . | .           |
| .     | ENST0000. | 2q2. | Score     | rs2008806 | ID: | . | . | 0.          |
| .     | ENST0000. | 2q2. | .         | rs9042902 | .   | . | . | .           |
| .     | ENST0000. | 2q3. | .         | rs3702772 | .   | . | . | .           |
| .     | ENST0000. | 2q3. | .         | rs5574456 | .   | . | . | 0.          |
| .     | ENST0000. | 3p2. | Score     | rs1446637 | .   | . | . | 0.078 0.081 |
| .     | ENST0000. | 3p2. | .         | .         | .   | . | . | .           |
| GRAMI | ENST0000. | 3q1. | .         | .         | .   | . | . | .           |
| DRD3  | ENST0000. | 3q1. | .         | rs2015548 | ID: | . | . | .           |
| .     | ENST0000. | 4p1. | .         | rs1163261 | .   | . | . | 0.          |
| .     | .         | 4p1. | Score=0.9 | rs4695484 | ID: | . | . | .           |
| .     | .         | 4p1. | Score=0.9 | rs4695485 | ID: | . | . | .           |
| SMR3E | ENST0000. | 4q1. | .         | rs7496227 | ID: | . | . | .           |

|        |          |     |    |           |           |           |        |       |       |
|--------|----------|-----|----|-----------|-----------|-----------|--------|-------|-------|
| PDLIM1 | ENST0000 | 4q3 | .  | .         | rs7758415 | ID        | .      | .     | .     |
| PCDH1A | ENST0000 | 5q3 | .  | Score=0.9 | .         | ID        | .      | .     | .     |
| .      | ENST0000 | 6p2 | .  | .         | rs1161907 | .         | .      | .     | .     |
| .      | ENST0000 | 6q1 | .  | .         | .         | .         | .      | .     | .     |
| .      | ENST0000 | 6q1 | .  | Score=0.9 | .         | .         | .      | .     | .     |
| .      | ENST0000 | 6q2 | .  | .         | rs7577542 | .         | .      | .     | .     |
| .      | ENST0000 | 7p2 | .  | .         | .         | .         | .      | .     | .     |
| ABCB1  | ENST0000 | 7q2 | .  | .         | .         | .         | .      | .     | .     |
| .      | ENST0000 | 7q2 | .  | Score=0.9 | .         | .         | .      | .     | .     |
| PCM1L  | ENST0000 | 8p2 | Sc | .         | rs7722351 | .         | .      | .     | .     |
| .      | ENST0000 | 8q2 | .  | .         | .         | .         | .      | .     | .     |
| TRAF2  | ENST0000 | 9q3 | .  | .         | rs7507213 | ID        | .      | .     | .     |
| .      | ENST0000 | 10p | Sc | .         | .         | .         | .      | .     | .     |
| ITGA8  | ENST0000 | 10p | .  | .         | rs7571508 | ID        | .      | .     | .     |
| .      | ENST0000 | 10p | .  | Score=0.9 | rs5655237 | .         | .      | 0     | 0.001 |
| .      | ENST0000 | 10q | .  | Score     | rs7905448 | ID        | .      | 0.347 | 0.355 |
| .      | ENST0000 | 10q | .  | .         | .         | .         | .      | .     | .     |
| .      | ENST0000 | 10q | .  | .         | rs9706750 | .         | .      | .     | .     |
| .      | ENST0000 | 10q | .  | .         | rs7723659 | .         | .      | .     | .     |
| INA:NM | ENST0000 | 10q | .  | .         | .         | ID        | .      | .     | .     |
| FGFR2  | ENST0000 | 10q | .  | .         | rs1219134 | ID        | Likely | .     | .     |
| DEAF1  | ENST0000 | 11p | .  | .         | .         | .         | .      | .     | .     |
| USH1C  | ENST0000 | 11p | .  | .         | rs5453728 | .         | .      | 0     | .     |
| USH1C  | ENST0000 | 11p | Sc | .         | .         | .         | .      | .     | .     |
| .      | ENST0000 | 11q | .  | .         | .         | .         | .      | .     | .     |
| OAS1L  | ENST0000 | 12q | .  | .         | rs1030864 | .         | .      | .     | .     |
| RB1:NM | ENST0000 | 13q | .  | .         | .         | .         | .      | .     | .     |
| .      | .        | 13q | .  | Score=0.9 | rs9145408 | .         | .      | .     | .     |
| .      | .        | 13q | .  | Score     | rs9816818 | .         | .      | .     | .     |
| .      | ENST0000 | 14q | .  | .         | .         | .         | .      | .     | .     |
| .      | ENST0000 | 14q | Sc | .         | .         | .         | .      | .     | .     |
| PRPF3  | ENST0000 | 14q | Sc | .         | rs5634662 | ID        | .      | 0     | .     |
| .      | ENST0000 | 14q | .  | .         | .         | .         | .      | .     | .     |
| EML5L  | ENST0000 | 14q | .  | .         | .         | .         | .      | .     | .     |
| HHIPL1 | ENST0000 | 14q | .  | .         | .         | .         | .      | .     | .     |
| .      | ENST0000 | 15q | .  | Score=0.9 | .         | .         | .      | .     | .     |
| .      | ENST0000 | 15q | .  | Score=0.9 | rs7780894 | .         | .      | .     | .     |
| MGA:N  | ENST0000 | 15q | .  | .         | .         | .         | .      | .     | .     |
| TTBK2  | ENST0000 | 15q | .  | Score     | .         | .         | .      | .     | .     |
| SLC9A1 | ENST0000 | 16q | .  | .         | .         | .         | .      | .     | .     |
| .      | ENST0000 | 17p | .  | .         | .         | .         | .      | .     | .     |
| .      | .        | 17p | .  | Score=0.9 | rs5864828 | .         | .      | .     | .     |
| .      | ENST0000 | 17q | .  | .         | rs7798230 | .         | .      | .     | .     |
| .      | ENST0000 | 18p | .  | .         | .         | .         | .      | .     | .     |
| CACNA  | ENST0000 | 19p | Sc | .         | rs7477304 | ID        | .      | .     | .     |
| OR7A1  | ENST0000 | 19p | .  | .         | .         | .         | .      | .     | .     |
| .      | ENST0000 | 19q | .  | Score=0.9 | Score     | rs9472013 | .      | .     | .     |
| APLP1  | ENST0000 | 19q | .  | .         | .         | .         | .      | .     | .     |
| .      | ENST0000 | 19q | .  | .         | .         | .         | .      | .     | .     |
| .      | ENST0000 | 19q | .  | .         | rs3718581 | .         | .      | .     | .     |
| .      | ENST0000 | 19q | .  | .         | rs1056285 | .         | .      | .     | .     |
| .      | ENST0000 | 20p | .  | .         | rs5584781 | ID        | .      | 0     | .     |
| .      | ENST0000 | 20p | .  | Score=0.9 | rs6037279 | ID        | .      | .     | .     |
| .      | ENST0000 | 20q | .  | .         | .         | .         | .      | .     | .     |

|       |           |      |     |           |                     |     |       |       |
|-------|-----------|------|-----|-----------|---------------------|-----|-------|-------|
|       | ENST0000. | 20q. | Sc. |           |                     |     |       |       |
|       | ENST0000. | 21p. |     | Score=0.9 | rs2013315 ID.       |     |       |       |
|       | ENST0000. | 21p. |     | Score=0.9 | rs2001788 ID.       |     |       |       |
| PKDRE | ENST0000. | 22q. |     |           | ID.                 |     |       |       |
| IRAK1 | ENST0000. | Xq2. |     |           |                     |     |       |       |
|       |           |      |     |           |                     |     |       |       |
|       |           |      |     |           |                     |     |       |       |
|       | ENST0000. | 1p3. |     | Score=0.9 | rs6263527 ID.       |     |       |       |
|       | ENST0000. | 1p3. |     |           |                     |     |       |       |
|       | ENST0000. | 1q2. |     | Score=0.9 | rs7457471 ID.       |     |       |       |
|       | ENST0000. | 1q2. | Sc. |           |                     |     |       |       |
|       | ENST0000. | 1q4. |     |           |                     |     |       |       |
|       |           | 2p1. |     | Score=0.9 | ID.                 |     |       |       |
|       |           | 2p1. |     | Score=0.9 | rs3711404 ID.       |     |       |       |
|       | ENST0000. | 2q3. | Sc. |           |                     |     |       |       |
|       | ENST0000. | 3q2. |     | Score=0.9 | rs7758373 ID.       |     |       |       |
|       | ENST0000. | 4p1. |     |           |                     |     |       |       |
|       |           | 4p1. |     | Score=0.9 | rs4694947           |     |       |       |
|       | ENST0000. | 9q2. |     | Score.    | ID.                 |     |       |       |
|       | ENST0000. | 10p. |     | Score=0.9 | rs4070334 ID.       |     |       |       |
|       | ENST0000. | 12q. |     | Score     | rs9213947           |     |       |       |
|       | ENST0000. | 14q. |     |           | rs1125033 ID.       |     |       |       |
|       | ENST0000. | 14q. |     | Score.    |                     |     |       |       |
| GOLG7 | ENST0000. | 15q. |     | Score=0.9 | rs2859043 ID: Benig |     |       |       |
|       | ENST0000. | 15q. |     | Score=0.9 |                     |     |       |       |
|       | ENST0000. | 18q. |     | Score.    | ID.                 |     |       |       |
|       | ENST0000. | 1q2. |     | Score=0.9 |                     |     |       |       |
|       | ENST0000. | 1q2. |     | Score=0.9 | rs2787778 ID.       |     |       |       |
|       | ENST0000. | 1q2. |     | Score=0.9 | rs2787777 ID.       |     | 0.319 | 0.325 |
|       |           | 2p1. |     | Score=0.9 | rs3711404 ID.       |     |       |       |
|       | ENST0000. | 5p1. |     | Score     | rs1997973           |     |       |       |
|       | ENST0000. | 7q1. |     | Score=0.9 | rs2018986 ID.       |     |       |       |
|       |           | 7q1. |     | Score=0.9 |                     |     |       |       |
| POLR2 | ENST0000. | 7q2. |     | Score=0.9 | rs1390499 ID.       |     |       |       |
|       |           | 8p2. |     | Score=0.9 | rs2077351 ID.       |     |       |       |
|       | ENST0000. | 9q1. |     | Score=0.9 | rs1136487 ID.       |     |       |       |
|       | ENST0000. | 9q2. |     | Score=0.9 | rs7648362 ID.       |     |       |       |
|       | ENST0000. | 9q2. |     |           |                     |     |       |       |
| FAM21 | ENST0000. | 10q. | Sc  | Score=0.9 | rs1995206 ID.       |     |       |       |
|       | ENST0000. | 11p. |     | Score=0.9 | rs3713518 ID.       |     |       |       |
|       | ENST0000. | 11p. |     |           | rs8790394           |     |       |       |
|       | ENST0000. | 17p. |     | Score=0.9 | rs1155611 ID.       |     |       |       |
| SLC35 | ENST0000. | 18p. |     | Score=0.9 | rs2018600 ID.       |     |       |       |
|       |           | 21p. |     | Score=0.9 | Score.              | ID. |       |       |
|       |           | 21p. |     | Score=0.9 | rs8792017 ID.       |     |       |       |
|       | ENST0000. | 21p. |     | Score     | rs1043983 ID.       |     |       |       |
|       | ENST0000. | Xq2. |     | Score=0.9 | rs1444677           |     | 0.107 | 0.101 |
|       | ENST0000. | 1p3. |     | Score=0.9 |                     |     |       |       |
|       | ENST0000. | 1p3. |     |           |                     |     |       |       |
|       | ENST0000. | 1p3. |     |           |                     |     |       |       |
| TMEM2 | ENST0000. | 1p3. | Sc. |           |                     |     |       |       |
|       | ENST0000. | 1p3. |     | Score=0.9 |                     |     |       |       |
|       | ENST0000. | 1p3. |     | Score=0.9 |                     |     |       |       |
|       | ENST0000. | 1p2. | Sc. |           |                     |     |       |       |

|        |           |      |            |                       |   |       |       |
|--------|-----------|------|------------|-----------------------|---|-------|-------|
| .      | ENST0000. | 1q2. | Score=0.9† | rs3894786 ID.         | . | .     | .     |
| .      | ENST0000. | 1q2. | Score=0.9† | rs1112760 ID.         | . | .     | .     |
| .      | ENST0000. | 1q2. | Score=0.9† | rs2017985 ID.         | . | .     | .     |
| .      | ENST0000. | 1q2. | Score=0.9† | rs3713084 ID.         | . | .     | .     |
| .      | ENST0000. | 1q2. | Score=0.9† | rs8799710.            | . | .     | .     |
| .      | ENST0000. | 1q2. | Score=0.9† | rs6699421 ID.         | . | .     | .     |
| .      | ENST0000. | 1q2. | Score=0.9† | rs8799669.            | . | .     | .     |
| OTUD7  | ENST0000. | 1q2. | .          | .                     | . | .     | .     |
| .      | ENST0000. | 1q2. | .          | .                     | . | .     | .     |
| RIT1:N | ENST0000. | 1q2. | Sc.        | rs4833528 ID: not pr. | . | .     | .     |
| .      | ENST0000. | 1q2. | .          | rs8940723.            | . | .     | .     |
| .      | ENST0000. | 1q2. | .          | rs7731705.            | . | .     | .     |
| .      | ENST0000. | 2p1. | Score=0.9† | .                     | . | .     | .     |
| .      | ENST0000. | 2p1. | .          | rs7781962.            | . | .     | .     |
| LYG2:† | ENST0000. | 2q1. | Sc.        | rs2018517 ID.         | . | 0     | 0.001 |
| SLC9A: | ENST0000. | 2q1. | Sc.        | .                     | . | .     | .     |
| EVX2:† | ENST0000. | 2q3. | .          | rs7685255.            | . | .     | .     |
| CWC2:  | ENST0000. | 2q3. | Sc.        | rs7551300.            | . | .     | .     |
| RPSA:† | ENST0000. | 3p2. | .          | rs6224264 ID.         | . | .     | .     |
| .      | ENST0000. | 3q2. | .          | .                     | . | .     | .     |
| ABCC5  | ENST0000. | 3q2. | Sc.        | .                     | . | .     | .     |
| HTR3C  | ENST0000. | 3q2. | .          | .                     | . | .     | .     |
| .      | ENST0000. | 3q2. | .          | .                     | . | .     | .     |
| .      | ENST0000. | 4q2. | .          | .                     | . | .     | .     |
| .      | ENST0000. | 4q2. | .          | rs5742217.            | . | 0     | .     |
| VEGFC  | ENST0000. | 4q3. | .          | rs5549088 ID.         | . | 0     | .     |
| .      | ENST0000. | 5p1. | Score=0.9† | Score.                | . | .     | .     |
| .      | ENST0000. | 5q1. | Score=0.9† | Score rs3759258.      | . | 0.777 | 0.772 |
| PTCD2  | ENST0000. | 5q1. | .          | .                     | . | .     | .     |
| .      | ENST0000. | 5q3. | .          | .                     | . | .     | .     |
| .      | ENST0000. | 5q3. | Sc.        | .                     | . | .     | .     |
| .      | ENST0000. | 5q3. | .          | .                     | . | .     | .     |
| .      | ENST0000. | 5q3. | .          | Score.                | . | .     | .     |
| .      | ENST0000. | 6p2. | .          | Score rs7580301.      | . | .     | .     |
| .      | ENST0000. | 6p2. | .          | rs7598672.            | . | .     | .     |
| .      | ENST0000. | 6p2. | .          | .                     | . | .     | .     |
| HLA-G: | ENST0000. | 6p2. | Score=0.8† | .                     | . | .     | .     |
| .      | ENST0000. | 6p2. | .          | .                     | . | .     | .     |
| .      | ENST0000. | 6p2. | .          | .                     | . | .     | .     |
| .      | ENST0000. | 6p2. | .          | .                     | . | .     | .     |
| .      | ENST0000. | 6q1. | .          | .                     | . | .     | .     |
| LOC44  | ENST0000. | 6q1. | Score=0.9† | .                     | . | .     | .     |
| .      | ENST0000. | 6q2. | Score.     | .                     | . | .     | .     |
| .      | ENST0000. | 7p2. | .          | .                     | . | .     | .     |
| .      | ENST0000. | 7q1. | Score=0.9† | rs2018986 ID.         | . | .     | .     |
| .      | ENST0000. | 7q2. | .          | rs9803140.            | . | .     | .     |
| .      | ENST0000. | 7q3. | Score=0.9† | Score rs1208357 ID.   | . | .     | .     |
| .      | ENST0000. | 7q3. | Score=0.9† | Score rs6248378 ID.   | . | .     | .     |
| GIMAP  | ENST0000. | 7q3. | .          | .                     | . | .     | .     |
| .      | ENST0000. | 7q3. | Score=0.9† | .                     | . | .     | .     |
| .      | ENST0000. | 8p2. | .          | .                     | . | .     | .     |
| .      | .         | 8p1. | .          | Score rs2022368 ID.   | . | .     | .     |
| .      | ENST0000. | 8q2. | .          | .                     | . | .     | .     |
| FRMD:  | ENST0000. | 9q2. | Sc.        | .                     | . | .     | .     |







|                  |      |               |               |                  |
|------------------|------|---------------|---------------|------------------|
| . ENST0000.      | 4p1. | . . .         | rs4970287 ID. | . . .            |
| . ENST0000.      | 4q2. | . . .         | . . .         | . . .            |
| TET2: ENST0000.  | 4q2. | . . .         | ID.           | . . .            |
| NIPBL: ENST0000. | 5p1. | . . .         | . . .         | . . .            |
| . ENST0000.      | 5q3. | . . .         | Score.        | . . .            |
| . ENST0000.      | 7p1. | . . .         | rs9642790.    | . . .            |
| . ENST0000.      | 7p1. | . . .         | Score=0.9.    | rs6246184 ID.    |
| . ENST0000.      | 7p1. | . . .         | Score=0.9.    | . . .            |
| LRCH4 ENST0000.  | 7q2. | Sc.           | . . .         | . . .            |
| PTPRZ ENST0000.  | 7q3. | . . .         | ID.           | . . .            |
| . ENST0000.      | 7q3. | . . .         | rs8915428.    | . . .            |
| . ENST0000.      | 7q3. | . . .         | . . .         | . . .            |
| . ENST0000.      | 8p2. | . . .         | . . .         | . . .            |
| ZNF70: ENST0000. | 8p1. | . . .         | . . .         | . . .            |
| . ENST0000.      | 8q1. | . . .         | . . .         | . . .            |
| . ENST0000.      | 9p2. | . . .         | . . .         | . . .            |
| . ENST0000.      | 9q3. | . . .         | . . .         | . . .            |
| . ENST0000.      | 10q. | . . .         | . . .         | . . .            |
| GRID1: ENST0000. | 10q. | . . .         | . . .         | . . .            |
| NOLC1 ENST0000.  | 10q. | . . .         | . . .         | . . .            |
| . ENST0000.      | 10q. | . . .         | . . .         | . . .            |
| . ENST0000.      | 10q. | . . .         | . . .         | . . .            |
| TRIM5: ENST0000. | 11p. | . . .         | . . .         | . . .            |
| NLRP1 ENST0000.  | 11p. | . . .         | ID.           | . . .            |
| . ENST0000.      | 11p. | . . .         | . . .         | . . .            |
| TRAF6 ENST0000.  | 11p. | Sc Score=0.9. | . . .         | . . .            |
| . ENST0000.      | 11q. | . . .         | . . .         | . . .            |
| DSCAM ENST0000.  | 11q. | . . .         | rs7580622 ID. | . . .            |
| CD163: ENST0000. | 12p. | . . .         | . . .         | . . .            |
| . . .            | 12q. | . . .         | . . .         | . . .            |
| GPD1: ENST0000.  | 12q. | . . .         | . . .         | . . .            |
| GPR84 ENST0000.  | 12q. | . . .         | . . .         | . . .            |
| . ENST0000.      | 12q. | . . .         | . . .         | . . .            |
| HCAR3 ENST0000.  | 12q. | . . .         | Score=0.9.    | . . .            |
| GPC5: ENST0000.  | 13q. | . . .         | . . .         | . . .            |
| . ENST0000.      | 14q. | . . .         | Score=0.9.    | rs7149806 ID.    |
| . . .            | 14q. | . . .         | Score.        | . . .            |
| NDN: ENST0000.   | 15q. | . . .         | Score=0.8.    | . . .            |
| . ENST0000.      | 15q. | . . .         | Score=0.9.    | Score rs1995696. |
| FMN1: ENST0000.  | 15q. | . . .         | . . .         | . . .            |
| . ENST0000.      | 15q. | . . .         | . . .         | . . .            |
| . ENST0000.      | 15q. | . . .         | . . .         | . . .            |
| ANPEP ENST0000.  | 15q. | . . .         | . . .         | . . .            |
| . ENST0000.      | 16p. | . . .         | . . .         | . . .            |
| . ENST0000.      | 16q. | . . .         | . . .         | . . .            |
| . ENST0000.      | 17p. | . . .         | . . .         | . . .            |
| . ENST0000.      | 17q. | . . .         | Score=0.9.    | . . .            |
| . ENST0000.      | 18p. | . . .         | Score=0.9.    | rs8790150 ID.    |
| . ENST0000.      | 19p. | . . .         | Score         | rs8673654 ID.    |
| MAN2E ENST0000.  | 19p. | . . .         | rs7668108.    | . . .            |
| CRLF1 ENST0000.  | 19p. | Sc.           | rs7683037.    | . . .            |
| . ENST0000.      | 19p. | . . .         | Score=0.9.    | . . .            |
| . ENST0000.      | 19q. | . . .         | . . .         | . . .            |
| MAP4K ENST0000.  | 19q. | . . .         | . . .         | . . .            |

|                  |      |     |           |                     |     |   |   |       |       |   |
|------------------|------|-----|-----------|---------------------|-----|---|---|-------|-------|---|
| . ENST0000.      | 19q. | .   | .         | .                   | .   | . | . | .     | .     | . |
| . ENST0000.      | 19q. | .   | .         | .                   | .   | . | . | .     | .     | . |
| . ENST0000.      | 19q. | .   | .         | .                   | .   | . | . | .     | .     | . |
| . ENST0000.      | 19q. | .   | .         | .                   | .   | . | . | .     | .     | . |
| . .              | 19q. | .   | Score=0.9 | .                   | .   | . | . | .     | .     | . |
| NLRP9 ENST0000.  | 19q. | .   | Score=0.9 | .                   | .   | . | . | .     | .     | . |
| . ENST0000.      | 20q. | .   | .         | .                   | .   | . | . | .     | .     | . |
| SALL4: ENST0000. | 20q. | .   | .         | .                   | .   | . | . | .     | .     | . |
| . .              | 21p. | .   | Score=0.9 | Score rs1118412     | .   | . | . | .     | .     | . |
| ADAM1 ENST0000.  | 21q. | .   | .         | .                   | .   | . | . | .     | .     | . |
| URB1: ENST0000.  | 21q. | Sc. | .         | .                   | .   | . | . | .     | .     | . |
| . .              | 22q. | .   | Score=0.8 | rs2006656 ID:       | .   | . | . | .     | .     | . |
| . ENST0000.      | 22q. | .   | .         | rs9392199           | .   | . | . | .     | .     | . |
| . ENST0000.      | Xp1. | .   | .         | Score rs734038      | .   | . | . | 0.207 | 0.192 | . |
| . ENST0000.      | Xq2. | .   | Score=0.9 | rs1826904           | .   | . | . | 0     | .     | . |
| OCRL: ENST0000.  | Xq2. | Sc. | .         | .                   | .   | . | . | .     | .     | . |
| GPR11 ENST0000.  | Xq2. | .   | .         | .                   | ID: | . | . | .     | .     | . |
| SLITR: ENST0000. | Xq2. | .   | .         | .                   | .   | . | . | .     | .     | . |
| F8:NM_ ENST0000. | Xq2. | .   | .         | .                   | .   | . | . | .     | .     | . |
| . .              | .    | .   | .         | .                   | .   | . | . | .     | .     | . |
| . .              | .    | .   | .         | .                   | .   | . | . | .     | .     | . |
| . ENST0000.      | 1p3. | .   | Score=0.9 | Score rs1810443 ID: | .   | . | . | .     | .     | . |
| . .              | 1q2. | .   | Score=0.9 | Score rs3698413     | .   | . | . | .     | .     | . |
| . ENST0000.      | 1q2. | .   | Score=0.9 | rs3774960           | .   | . | . | .     | .     | . |
| . ENST0000.      | 1q2. | .   | .         | rs2596327 ID:       | .   | . | . | .     | .     | . |
| . ENST0000.      | 1q2. | .   | Score=0.9 | rs2020368           | .   | . | . | .     | .     | . |
| . .              | 1q2. | .   | Score=0.9 | .                   | .   | . | . | .     | .     | . |
| . ENST0000.      | 2p1. | .   | Score.    | .                   | .   | . | . | .     | .     | . |
| . ENST0000.      | 2p1. | .   | Score=0.9 | rs2647769 ID:       | .   | . | . | .     | .     | . |
| . ENST0000.      | 2q1. | .   | Score.    | .                   | .   | . | . | .     | .     | . |
| . ENST0000.      | 2q1. | .   | Score.    | .                   | .   | . | . | .     | .     | . |
| . ENST0000.      | 2q1. | .   | Score.    | .                   | .   | . | . | .     | .     | . |
| . ENST0000.      | 2q2. | .   | Score=0.9 | Score rs6216494     | .   | . | . | .     | .     | . |
| . ENST0000.      | 3q2. | .   | Score.    | .                   | .   | . | . | .     | .     | . |
| . ENST0000.      | 4p1. | .   | .         | .                   | .   | . | . | .     | .     | . |
| . .              | 4q1. | .   | .         | Score rs1429725     | .   | . | . | 0.684 | 0.681 | . |
| . ENST0000.      | 5p1. | .   | Score=0.9 | rs2871612 ID:       | .   | . | . | .     | .     | . |
| . ENST0000.      | 7p1. | .   | Score=0.9 | rs6246206 ID:       | .   | . | . | .     | .     | . |
| . ENST0000.      | 7q1. | .   | Score=0.9 | rs3680944 ID:       | .   | . | . | .     | .     | . |
| . ENST0000.      | 8q1. | .   | Score=0.9 | Score rs1499905 ID: | .   | . | . | .     | .     | . |
| . ENST0000.      | 10q. | .   | .         | .                   | .   | . | . | .     | .     | . |
| . ENST0000.      | 10q. | .   | .         | Score rs7710236 ID: | .   | . | . | .     | .     | . |
| . ENST0000.      | 10q. | .   | .         | rs1788433 ID:       | .   | . | . | .     | .     | . |
| . ENST0000.      | 10q. | .   | .         | .                   | .   | . | . | .     | .     | . |
| . ENST0000.      | 11q. | .   | Score.    | .                   | .   | . | . | .     | .     | . |
| . ENST0000.      | 12p. | .   | Score=0.9 | rs1063873           | .   | . | . | 0.269 | 0.267 | . |
| . ENST0000.      | 14q. | .   | Score=0.9 | Score rs4247513     | .   | . | . | .     | .     | . |
| . ENST0000.      | 14q. | .   | Score=0.9 | rs7445485           | .   | . | . | .     | .     | . |
| . ENST0000.      | 14q. | .   | Score=0.9 | rs8678279           | .   | . | . | .     | .     | . |
| . ENST0000.      | 14q. | .   | .         | .                   | .   | . | . | .     | .     | . |
| . ENST0000.      | 17q. | .   | Score=0.9 | rs3930170 ID:       | .   | . | . | .     | .     | . |
| . ENST0000.      | 17q. | .   | .         | Score rs3894278 ID: | .   | . | . | .     | .     | . |
| . .              | 21p. | .   | Score=0.9 | rs1963041 ID:       | .   | . | . | .     | .     | . |
| . ENST0000.      | 22q. | .   | Score=0.9 | rs3716554           | .   | . | . | .     | .     | . |

|                 |      |             |               |   |   |       |       |   |
|-----------------|------|-------------|---------------|---|---|-------|-------|---|
| . ENST0000.     | 22q. | . Score=0.9 | .             | . | . | .     | .     | . |
| . ENST0000.     | Xq2. | . Score=0.9 | rs7819787.    | . | . | 0.254 | 0.249 | . |
| . ENST0000.     | 1p3. | . Score=0.9 | .             | . | . | .     | .     | . |
| . ENST0000.     | 1p3. | . Score=0.9 | rs453347 ID.  | . | . | 0.45  | 0.437 | . |
| . ENST0000.     | 1p3. | .           | .             | . | . | .     | .     | . |
| . ENST0000.     | 1q2. | . Score=0.9 | rs1812127.    | . | . | .     | .     | . |
| . ENST0000.     | 1q2. | . Score=0.9 | Score.        | . | . | .     | .     | . |
| . ENST0000.     | 1q2. | . Score=0.9 | rs8799607.    | . | . | .     | .     | . |
| . ENST0000.     | 1q2. | . Score=0.9 | rs1451754 ID. | . | . | .     | .     | . |
| . ENST0000.     | 1q2. | . Score=0.9 | rs2003945 ID. | . | . | .     | .     | . |
| . ENST0000.     | 1q2. | . Score=0.9 | rs7970322.    | . | . | .     | .     | . |
| . ENST0000.     | 1q3. | .           | .             | . | . | .     | .     | . |
| . ENST0000.     | 2q3. | .           | rs1996199 ID. | . | . | .     | .     | . |
| . ENST0000.     | 3p2. | .           | Score.        | . | . | .     | .     | . |
| . ENST0000.     | 3q2. | .           | rs1873413.    | . | . | 0.063 | 0.055 | . |
| . .             | 3q2. | . Score=0.9 | rs3723871.    | . | . | .     | .     | . |
| . ENST0000.     | 3q2. | .           | Score.        | . | . | .     | .     | . |
| . ENST0000.     | 3q2. | . Score=0.9 | rs2006820.    | . | . | .     | .     | . |
| . .             | 4p1. | . Score=0.9 | .             | . | . | .     | .     | . |
| . ENST0000.     | 5q3. | .           | .             | . | . | .     | .     | . |
| . .             | 6q2. | .           | Score.        | . | . | .     | .     | . |
| . ENST0000.     | 6q2. | . Score=0.9 | rs7746421 ID. | . | . | 0.359 | 0.355 | . |
| . .             | 6q2. | . Score=0.9 | rs3759780.    | . | . | .     | .     | . |
| . .             | 7q1. | . Score=0.9 | ID.           | . | . | .     | .     | . |
| . .             | 7q1. | . Score=0.9 | .             | . | . | .     | .     | . |
| AUTS2 ENST0000. | 7q1. | Sc.         | Score.        | . | . | .     | .     | . |
| . ENST0000.     | 9p1. | . Score=0.9 | rs2803685 ID. | . | . | .     | .     | . |
| . .             | 10q. | . Score=0.9 | rs1996770.    | . | . | .     | .     | . |
| . .             | 10q. | . Score=0.9 | rs1456597 ID. | . | . | .     | .     | . |
| . ENST0000.     | 11p. | .           | Score.        | . | . | .     | .     | . |
| . ENST0000.     | 11q. | Sc.         | .             | . | . | .     | .     | . |
| . ENST0000.     | 12p. | . Score=0.9 | rs3718339 ID. | . | . | .     | .     | . |
| . ENST0000.     | 12p. | . Score=0.9 | rs3767721 ID. | . | . | .     | .     | . |
| . ENST0000.     | 12q. | .           | rs5604999 ID. | . | . | .     | .     | . |
| . ENST0000.     | 14q. | . Score=0.9 | rs7755744 ID. | . | . | .     | .     | . |
| . ENST0000.     | 14q. | . Score=0.9 | rs1018908 ID. | . | . | .     | .     | . |
| . ENST0000.     | 15q. | . Score=0.9 | .             | . | . | .     | .     | . |
| AQR:N ENST0000. | 15q. | .           | rs7568595.    | . | . | .     | .     | . |
| . ENST0000.     | 16p. | . Score=0.9 | rs3739171.    | . | . | .     | .     | . |
| . ENST0000.     | 16q. | . Score=0.9 | rs7137409.    | . | . | 0.251 | 0.262 | . |
| . ENST0000.     | 17p. | . Score=0.9 | rs7124761.    | . | . | .     | .     | . |
| . ENST0000.     | 17p. | . Score=0.9 | rs6149181 ID. | . | . | .     | .     | . |
| . ENST0000.     | 17q. | . Score=0.9 | rs2870408 ID. | . | . | .     | .     | . |
| . ENST0000.     | 17q. | . Score=0.9 | rs2848380 ID. | . | . | .     | .     | . |
| . ENST0000.     | 17q. | .           | .             | . | . | .     | .     | . |
| . ENST0000.     | 18q. | .           | .             | . | . | .     | .     | . |
| . ENST0000.     | 19p. | .           | Score.        | . | . | .     | .     | . |
| . ENST0000.     | 21p. | . Score=0.9 | .             | . | . | .     | .     | . |
| . ENST0000.     | 22q. | . Score=0.9 | ID.           | . | . | .     | .     | . |
| . ENST0000.     | 22q. | . Score=0.9 | rs3609392.    | . | . | 0.266 | 0.302 | . |
| . ENST0000.     | Xp1. | .           | .             | . | . | .     | .     | . |
| MXRA ENST0000.  | 1p3. | .           | rs7558529.    | . | . | .     | .     | . |
| . ENST0000.     | 1p3. | . Score=0.9 | .             | . | . | .     | .     | . |
| . ENST0000.     | 1p3. | .           | .             | . | . | .     | .     | . |

|                  |      |     |           |                 |     |   |   |       |       |
|------------------|------|-----|-----------|-----------------|-----|---|---|-------|-------|
| . ENST0000.      | 1p3. | .   | .         | .               | .   | . | . | .     | .     |
| . ENST0000.      | 1p3. | .   | .         | .               | .   | . | . | .     | .     |
| . ENST0000.      | 1p3. | Sc. | .         | .               | .   | . | . | .     | .     |
| . ENST0000.      | 1p3. | Sc. | .         | .               | .   | . | . | .     | .     |
| UNKNC ENST0000.  | 1p2. | .   | .         | .               | .   | . | . | .     | .     |
| LRR8 ENST0000.   | 1p2. | Sc  | Score=0.9 | .               | .   | . | . | .     | .     |
| . ENST0000.      | 1p1. | Sc. | .         | rs1430207       | .   | . | . | 0.002 | 0.001 |
| . ENST0000.      | 1p1. | .   | Score=0.9 | Score.          | .   | . | . | .     | .     |
| . ENST0000.      | 1q2. | .   | Score=0.9 | rs1996428 ID.   | .   | . | . | .     | .     |
| . ENST0000.      | 1q2. | .   | Score=0.9 | Score.          | ID. | . | . | .     | .     |
| . ENST0000.      | 1q2. | .   | Score=0.9 | rs3755029       | .   | . | . | .     | .     |
| . ENST0000.      | 1q2. | .   | Score=0.9 | rs2849511       | .   | . | . | .     | .     |
| . ENST0000.      | 1q2. | .   | Score=0.9 | rs7824596       | .   | . | . | .     | .     |
| . ENST0000.      | 1q2. | .   | Score=0.9 | rs3765099 ID.   | .   | . | . | .     | .     |
| TCHH: ENST0000.  | 1q2. | .   | .         | rs9099303 ID.   | .   | . | . | .     | .     |
| . ENST0000.      | 1q2. | .   | .         | .               | .   | . | . | .     | .     |
| . ENST0000.      | 1q2. | .   | .         | .               | .   | . | . | .     | .     |
| . ENST0000.      | 1q3. | .   | .         | .               | .   | . | . | .     | .     |
| . ENST0000.      | 1q3. | .   | .         | .               | .   | . | . | .     | .     |
| . ENST0000.      | 2q3. | .   | .         | .               | .   | . | . | .     | .     |
| . ENST0000.      | 2q3. | .   | .         | .               | .   | . | . | .     | .     |
| ITPR1: ENST0000. | 3p2. | .   | .         | rs7793139 ID.   | .   | . | . | .     | .     |
| . ENST0000.      | 3p2. | .   | .         | .               | .   | . | . | .     | .     |
| . ENST0000.      | 3p2. | .   | .         | .               | .   | . | . | .     | .     |
| STAB1 ENST0000.  | 3p2. | Sc. | .         | .               | .   | . | . | .     | .     |
| NELFA ENST0000.  | 4p1. | .   | .         | rs7785731       | .   | . | . | .     | .     |
| . ENST0000.      | 4q2. | .   | .         | rs7749410       | .   | . | . | .     | .     |
| . ENST0000.      | 5p1. | .   | Score=0.9 | rs2382048 ID.   | .   | . | . | .     | .     |
| DHFR: ENST0000.  | 5q1. | .   | .         | rs7817278       | .   | . | . | .     | .     |
| . ENST0000.      | 5q2. | .   | .         | .               | .   | . | . | .     | .     |
| ZNF47: ENST0000. | 5q2. | .   | .         | rs1140023 ID.   | .   | . | . | 0     | .     |
| . ENST0000.      | 5q3. | .   | .         | .               | .   | . | . | .     | .     |
| GABRE ENST0000.  | 5q3. | Sc. | .         | .               | .   | . | . | .     | .     |
| . ENST0000.      | 6p2. | .   | .         | .               | .   | . | . | .     | .     |
| SLC44: ENST0000. | 6p2. | .   | .         | .               | .   | . | . | .     | .     |
| . ENST0000.      | 6p1. | .   | .         | .               | .   | . | . | .     | .     |
| . ENST0000.      | 6q2. | .   | Score=0.9 | rs9907394       | .   | . | . | .     | .     |
| ARID1E ENST0000. | 6q2. | .   | .         | ID.             | .   | . | . | .     | .     |
| MLLT4: ENST0000. | 6q2. | .   | .         | .               | .   | . | . | .     | .     |
| . ENST0000.      | 6q2. | .   | .         | .               | .   | . | . | .     | .     |
| TTYH3 ENST0000.  | 7p2. | Sc. | .         | .               | .   | . | . | .     | .     |
| . ENST0000.      | 7p2. | .   | Score=0.9 | .               | .   | . | . | .     | .     |
| ISPD: ENST0000.  | 7p2. | .   | .         | rs7468373       | .   | . | . | .     | .     |
| HECW ENST0000.   | 7p1. | .   | .         | .               | .   | . | . | .     | .     |
| . ENST0000.      | 7p1. | .   | .         | Score.          | .   | . | . | .     | .     |
| . ENST0000.      | 7q3. | .   | .         | rs5705914       | .   | . | . | 0     | .     |
| GIMAP ENST0000.  | 7q3. | Sc. | .         | rs1481871 ID.   | .   | . | . | .     | .     |
| . ENST0000.      | 8p2. | .   | .         | rs7588073       | .   | . | . | .     | .     |
| . ENST0000.      | 8p2. | .   | .         | rs7479925       | .   | . | . | .     | .     |
| . ENST0000.      | 8p1. | .   | .         | Score.          | .   | . | . | .     | .     |
| . ENST0000.      | 8q2. | .   | .         | Score rs5327262 | .   | . | . | .     | .     |
| . ENST0000.      | 8q2. | .   | .         | rs5696070       | .   | . | . | 0     | .     |
| GNA14 ENST0000.  | 9q2. | .   | .         | rs3682437       | .   | . | . | 0     | .     |
| OR13C ENST0000.  | 9q3. | .   | .         | rs3746457       | .   | . | . | 0.003 | 0.003 |

|                   |      |     |           |                     |        |   |   |             |
|-------------------|------|-----|-----------|---------------------|--------|---|---|-------------|
| . ENST0000.       | 9q3. | .   | .         | rs7528554.          | .      | . | . | .           |
| PHPT1 ENST0000.   | 9q3. | .   | .         | rs5640471 ID.       | .      | . | . | .           |
| . ENST0000.       | 9q3. | .   | .         | rs5505690.          | .      | . | . | 0.          |
| RBM20 ENST0000.   | 10q. | .   | .         | .                   | .      | . | . | .           |
| . ENST0000.       | 11p. | .   | .         | Score rs7615769 ID. | .      | . | . | .           |
| DCDC5 ENST0000.   | 11p. | .   | .         | .                   | .      | . | . | .           |
| DGKZ:1 ENST0000.  | 11p. | Sc. | .         | rs7817387 ID.       | .      | . | . | .           |
| .                 | 11q. | .   | .         | .                   | .      | . | . | .           |
| C11orf1 ENST0000. | 11q. | .   | .         | rs7525419.          | .      | . | . | .           |
| . ENST0000.       | 11q. | .   | .         | .                   | .      | . | . | .           |
| . ENST0000.       | 11q. | .   | .         | .                   | .      | . | . | .           |
| RASAL ENST0000.   | 12q. | Sc. | .         | .                   | .      | . | . | .           |
| WDR61 ENST0000.   | 12q. | .   | .         | rs1409770 ID.       | .      | . | . | 0.          |
| . ENST0000.       | 13q. | .   | .         | .                   | .      | . | . | .           |
| .                 | 13q. | .   | .         | .                   | .      | . | . | .           |
| . ENST0000.       | 14q. | .   | Score=0.9 | Score.              | ID.    | . | . | .           |
| . ENST0000.       | 14q. | .   | .         | .                   | .      | . | . | .           |
| . ENST0000.       | 14q. | .   | .         | .                   | .      | . | . | .           |
| . ENST0000.       | 14q. | .   | .         | .                   | .      | . | . | .           |
| . ENST0000.       | 14q. | .   | .         | .                   | .      | . | . | .           |
| ITFG3:1 ENST0000. | 16p. | .   | .         | rs7663922.          | .      | . | . | .           |
| . ENST0000.       | 16p. | .   | .         | rs5750779.          | .      | . | . | 0.          |
| . ENST0000.       | 16p. | .   | .         | .                   | .      | . | . | .           |
| . ENST0000.       | 16p. | .   | .         | .                   | .      | . | . | .           |
| . ENST0000.       | 16p. | .   | Score=0.9 | rs7569695.          | .      | . | . | .           |
| . ENST0000.       | 16p. | .   | Score=0.9 | rs7520038.          | .      | . | . | .           |
| . ENST0000.       | 17q. | .   | .         | Score.              | .      | . | . | .           |
| CCL4:1 ENST0000.  | 17q. | Sc  | Score=0.9 | rs3713755.          | .      | . | . | 0.          |
| KRT24: ENST0000.  | 17q. | .   | .         | rs7744485.          | .      | . | . | .           |
| ACSF2 ENST0000.   | 17q. | .   | .         | rs7460185 ID.       | .      | . | . | .           |
| . ENST0000.       | 17q. | .   | .         | Score rs8668152.    | .      | . | . | .           |
| . ENST0000.       | 17q. | .   | Score=0.9 | rs8665784 ID.       | .      | . | . | .           |
| SEPT9 ENST0000.   | 17q. | .   | .         | .                   | .      | . | . | .           |
| CBX2:1 ENST0000.  | 17q. | .   | .         | rs1995663.          | .      | . | . | 0.          |
| . ENST0000.       | 17q. | .   | .         | .                   | .      | . | . | .           |
| .                 | 19q. | .   | Score=0.9 | rs3865492 ID.       | .      | . | . | 0.174 0.216 |
| .                 | 19q. | .   | Score=0.9 | .                   | .      | . | . | .           |
| GRIK5: ENST0000.  | 19q. | Sc. | .         | rs7571526 ID.       | .      | . | . | .           |
| APOC4 ENST0000.   | 19q. | .   | .         | rs7565559 ID.       | .      | . | . | .           |
| SIRPB' ENST0000.  | 20p. | .   | .         | .                   | .      | . | . | .           |
| . ENST0000.       | 20q. | .   | .         | .                   | .      | . | . | .           |
| UNKN ENST0000.    | 20q. | .   | .         | rs3774092.          | .      | . | . | .           |
| . ENST0000.       | 21q. | .   | .         | .                   | .      | . | . | .           |
| .                 | 22q. | .   | Score=0.9 | rs6197100.          | .      | . | . | 0.168 0.168 |
| . ENST0000.       | 22q. | .   | Score=0.9 | .                   | .      | . | . | .           |
| . ENST0000.       | 22q. | .   | Score=0.9 | rs5662423 ID.       | .      | . | . | .           |
| . ENST0000.       | 22q. | .   | .         | .                   | .      | . | . | .           |
| . ENST0000.       | 22q. | .   | .         | rs1007675.          | .      | . | . | .           |
| . ENST0000.       | Xp1. | .   | .         | Score.              | .      | . | . | .           |
| . ENST0000.       | Xp1. | .   | .         | .                   | .      | . | . | .           |
| CLCN5 ENST0000.   | Xp1. | .   | .         | rs7970448.          | Patho. | . | . | .           |
| ITIH6:1 ENST0000. | Xp1. | .   | .         | .                   | .      | . | . | .           |
| . ENST0000.       | Xq2. | .   | Score=0.9 | .                   | .      | . | . | .           |
| . ENST0000.       | 1p3. | .   | Score=0.9 | Score rs4634900 ID. | .      | . | . | .           |

|         |           |      |     |           |                     |        |   |       |       |
|---------|-----------|------|-----|-----------|---------------------|--------|---|-------|-------|
| .       | ENST0000. | 1p3. | .   | .         | .                   | .      | . | .     | .     |
| .       | .         | 1q2. | .   | Score=0.9 | Score rs7450506 ID: | .      | . | .     | .     |
| .       | .         | 1q2. | .   | Score=0.9 | rs2016919.          | .      | . | .     | .     |
| .       | .         | 1q2. | .   | Score=0.9 | .                   | .      | . | .     | .     |
| .       | ENST0000. | 1q2. | .   | Score=0.9 | rs8662584 ID:       | .      | . | .     | .     |
| .       | ENST0000. | 1q2. | .   | Score=0.9 | rs4143495 ID:       | .      | . | .     | .     |
| .       | ENST0000. | 1q2. | .   | Score=0.9 | rs6181077 ID:       | .      | . | .     | .     |
| .       | ENST0000. | 1q2. | .   | .         | .                   | .      | . | .     | .     |
| .       | ENST0000. | 1q3. | .   | .         | rs2003501.          | .      | . | 0     | 0.001 |
| .       | ENST0000. | 2p1. | .   | .         | .                   | .      | . | .     | .     |
| .       | ENST0000. | 2p1. | Sc. | .         | rs1834895.          | Uncer. | . | 0     | .     |
| DYSF:↑  | ENST0000. | 2p1. | .   | .         | rs2009908 ID:       | Uncer. | . | .     | .     |
| WBP1:↓  | ENST0000. | 2p1. | .   | .         | .                   | .      | . | .     | .     |
| .       | ENST0000. | 2q1. | .   | Score=0.9 | rs9528 ID:          | .      | . | .     | .     |
| .       | ENST0000. | 2q2. | Sc. | .         | .                   | .      | . | .     | .     |
| GPC1:↑  | ENST0000. | 2q3. | .   | .         | rs3739748.          | .      | . | .     | .     |
| .       | ENST0000. | 3p2. | .   | .         | rs5683253.          | .      | . | .     | .     |
| .       | ENST0000. | 3p2. | .   | .         | rs1474450.          | .      | . | 0     | .     |
| ABHD1   | ENST0000. | 3p2. | Sc. | .         | rs2004359.          | .      | . | .     | .     |
| ARHG/   | ENST0000. | 3q1. | .   | .         | .                   | .      | . | .     | .     |
| .       | ENST0000. | 4p1. | .   | .         | .                   | .      | . | .     | .     |
| .       | ENST0000. | 4p1. | .   | .         | .                   | .      | . | .     | .     |
| SH3TC   | ENST0000. | 4p1. | Sc. | .         | .                   | .      | . | .     | .     |
| .       | ENST0000. | 4p1. | Sc. | .         | .                   | .      | . | .     | .     |
| .       | .         | 4p1. | .   | Score=0.9 | rs2932367 ID:       | .      | . | .     | .     |
| .       | ENST0000. | 4p1. | .   | Score=0.9 | ID:                 | .      | . | .     | .     |
| .       | ENST0000. | 4q1. | .   | .         | .                   | .      | . | .     | .     |
| GK2:NI  | ENST0000. | 4q2. | .   | .         | rs7669673 ID:       | .      | . | .     | .     |
| .       | ENST0000. | 5q1. | .   | .         | .                   | .      | . | .     | .     |
| .       | .         | 5q1. | Sc. | .         | .                   | .      | . | .     | .     |
| SLCO4   | ENST0000. | 5q2. | Sc. | .         | .                   | .      | . | .     | .     |
| .       | ENST0000. | 5q3. | Sc. | .         | ID:                 | .      | . | .     | .     |
| .       | ENST0000. | 5q3. | .   | .         | rs5319092.          | .      | . | 0     | .     |
| .       | ENST0000. | 6p2. | .   | .         | Score rs5661365.    | .      | . | 0     | .     |
| .       | ENST0000. | 6p2. | .   | Score=0.8 | .                   | .      | . | .     | .     |
| TNXB:↑  | ENST0000. | 6p2. | Sc. | .         | .                   | .      | . | .     | .     |
| INTS1:↓ | ENST0000. | 7p2. | .   | .         | rs1814105.          | .      | . | 0     | .     |
| .       | .         | 7p1. | .   | Score=0.9 | rs7827655.          | .      | . | .     | .     |
| .       | ENST0000. | 7q2. | .   | .         | rs1484992.          | .      | . | 0.003 | 0.002 |
| .       | ENST0000. | 7q2. | .   | .         | rs5523938.          | .      | . | 0.005 | 0.004 |
| DGKI:↓  | ENST0000. | 7q3. | Sc. | .         | ID:                 | .      | . | .     | .     |
| .       | ENST0000. | 7q3. | .   | .         | rs3737114.          | .      | . | .     | .     |
| OR2A2   | ENST0000. | 7q3. | Sc. | .         | .                   | .      | . | .     | .     |
| .       | ENST0000. | 8q1. | .   | Score=0.9 | rs9982298.          | .      | . | .     | .     |
| OTUD6   | ENST0000. | 8q2. | .   | .         | .                   | .      | . | .     | .     |
| GLIS3:↓ | ENST0000. | 9p2. | .   | .         | .                   | .      | . | .     | .     |
| .       | ENST0000. | 9p2. | .   | .         | .                   | .      | . | .     | .     |
| .       | ENST0000. | 9q1. | .   | Score=0.9 | rs9330412 ID:       | .      | . | .     | .     |
| .       | ENST0000. | 9q2. | .   | .         | .                   | .      | . | .     | .     |
| .       | .         | 9q3. | .   | Score=0.9 | .                   | .      | . | .     | .     |
| GPSM1   | ENST0000. | 9q3. | Sc. | .         | rs9459874.          | .      | . | .     | .     |
| .       | ENST0000. | 9q3. | .   | .         | rs9494422.          | .      | . | .     | .     |
| GPR15   | ENST0000. | 10p. | Sc. | .         | .                   | .      | . | .     | .     |
| ZNF33/  | ENST0000. | 10p. | .   | Score=0.9 | .                   | .      | . | .     | .     |

|         |           |      |              |                 |            |       |       |
|---------|-----------|------|--------------|-----------------|------------|-------|-------|
| .       | .         | 10q. | Score=0.9    | rs2996811       | .          | .     | .     |
| .       | ENST0000. | 10q. | Score=0.9    | .               | .          | .     | .     |
| .       | ENST0000. | 10q. | .            | .               | .          | .     | .     |
| .       | ENST0000. | 10q. | .            | rs7792060       | .          | .     | .     |
| .       | ENST0000. | 11p. | .            | .               | .          | .     | .     |
| .       | ENST0000. | 11q. | .            | .               | .          | .     | .     |
| HYOU1   | ENST0000. | 11q. | Sc.          | .               | .          | .     | .     |
| .       | ENST0000. | 11q. | .            | .               | .          | .     | .     |
| .       | ENST0000. | 12p. | .            | .               | .          | .     | .     |
| ETV6:1  | ENST0000. | 12p. | .            | ID:             | .          | .     | .     |
| KRAS:1  | ENST0000. | 12p. | Sc.          | rs1219135       | ID: Patho. | .     | .     |
| KIF5A:1 | ENST0000. | 12q. | .            | rs3522560       | Benig.     | 0     | .     |
| .       | ENST0000. | 12q. | .            | .               | .          | .     | .     |
| .       | ENST0000. | 12q. | .            | rs5396169       | .          | 0     | .     |
| .       | .         | 13q. | Score=0.9    | .               | .          | .     | .     |
| .       | ENST0000. | 14q. | Score.       | .               | .          | .     | .     |
| .       | ENST0000. | 14q. | .            | rs8791962       | .          | .     | .     |
| .       | ENST0000. | 15q. | Score=0.9    | .               | .          | .     | .     |
| NDN:1   | ENST0000. | 15q. | Sc Score=0.8 | .               | .          | .     | .     |
| GABRA   | ENST0000. | 15q. | .            | ID:             | .          | .     | .     |
| .       | ENST0000. | 15q. | Score=0.9    | rs7831577       | .          | 0.095 | 0.082 |
| .       | .         | 15q. | Score=0.9    | rs2010114       | ID:        | .     | .     |
| .       | ENST0000. | 16p. | .            | .               | .          | .     | .     |
| .       | ENST0000. | 16p. | Score=0.9    | .               | .          | .     | .     |
| .       | ENST0000. | 16q. | .            | .               | .          | .     | .     |
| .       | ENST0000. | 16q. | Score=0.9    | rs2001829       | ID:        | .     | .     |
| .       | ENST0000. | 16q. | .            | .               | .          | .     | .     |
| RFFL:1  | ENST0000. | 17q. | .            | .               | .          | .     | .     |
| .       | ENST0000. | 17q. | Score=0.9    | .               | .          | .     | .     |
| .       | ENST0000. | 17q. | .            | .               | .          | .     | .     |
| .       | ENST0000. | 17q. | .            | .               | .          | .     | .     |
| .       | ENST0000. | 18q. | Score=0.9    | Score.          | .          | .     | .     |
| .       | ENST0000. | 19p. | .            | Score rs8673654 | ID:        | .     | .     |
| UNKN    | ENST0000. | 19p. | .            | .               | .          | .     | .     |
| DOCK    | ENST0000. | 19p. | Sc.          | rs7680686       | .          | .     | .     |
| LRFN3   | ENST0000. | 19q. | .            | .               | .          | .     | .     |
| .       | ENST0000. | 19q. | Score=0.9    | .               | .          | .     | .     |
| ZNF22   | ENST0000. | 19q. | .            | .               | .          | .     | .     |
| .       | ENST0000. | 19q. | .            | .               | .          | .     | .     |
| .       | ENST0000. | 19q. | Score.       | .               | .          | .     | .     |
| ZNF81   | ENST0000. | 19q. | Score=0.9    | rs7705940       | .          | .     | .     |
| STK35:  | ENST0000. | 20p. | Sc.          | .               | .          | .     | .     |
| .       | ENST0000. | 20p. | .            | rs2002254       | .          | 0     | .     |
| FAM83   | ENST0000. | 20q. | .            | .               | .          | .     | .     |
| .       | .         | 20q. | Score.       | .               | .          | .     | .     |
| NCAM2   | ENST0000. | 21q. | Sc.          | .               | .          | .     | .     |
| SYN3:1  | ENST0000. | 22q. | .            | .               | .          | .     | .     |
| .       | ENST0000. | Xp1. | Score=0.9    | .               | .          | .     | .     |
| ARMC    | ENST0000. | Xq2. | .            | .               | .          | .     | .     |
| TEX13:  | ENST0000. | Xq2. | .            | ID:             | .          | .     | .     |
| NRK:1   | ENST0000. | Xq2. | .            | rs7533837       | .          | 0.002 | 0.001 |
| .       | ENST0000. | Xq2. | .            | .               | .          | .     | .     |
| .       | ENST0000. | Xq2. | .            | rs7767123       | .          | .     | .     |
| .       | ENST0000. | Xq2. | .            | .               | .          | .     | .     |



|        |           |      |     |           |                  |        |       |       |
|--------|-----------|------|-----|-----------|------------------|--------|-------|-------|
| G6PD:1 | ENST0000. | Xq2. | .   | .         | rs3981235.       | Patho. | 0.002 | 0.001 |
| .      | .         | .    | .   | .         | .                | .      | .     | .     |
| .      | ENST0000. | 1p3. | .   | .         | .                | .      | .     | .     |
| .      | ENST0000. | 1p3. | .   | Score=0.9 | rs1015792 ID:    | .      | .     | .     |
| TAS1R  | ENST0000. | 1p3. | .   | .         | .                | .      | .     | .     |
| RAP1G  | ENST0000. | 1p3. | .   | .         | rs1453424.       | .      | .     | .     |
| BTBD8  | ENST0000. | 1p2. | Sc. | .         | .                | .      | .     | .     |
| .      | ENST0000. | 1q2. | .   | Score=0.9 | rs7704066.       | .      | .     | .     |
| .      | ENST0000. | 1q2. | .   | Score=0.9 | rs1415172 ID:    | .      | .     | .     |
| .      | ENST0000. | 1q2. | .   | Score=0.9 | rs1256214 ID:    | .      | .     | .     |
| .      | ENST0000. | 1q2. | .   | Score=0.9 | rs3721624.       | .      | .     | .     |
| .      | ENST0000. | 1q2. | .   | Score=0.9 | rs5876752 ID:    | .      | 0.269 | 0.314 |
| .      | ENST0000. | 1q2. | .   | Score=0.9 | .                | .      | .     | .     |
| CA14:1 | ENST0000. | 1q2. | Sc. | .         | rs3730063.       | .      | .     | .     |
| .      | ENST0000. | 1q2. | .   | .         | .                | .      | .     | .     |
| KCNH1  | ENST0000. | 1q3. | .   | .         | .                | .      | .     | .     |
| KCNK1  | ENST0000. | 2p2. | Sc. | .         | .                | .      | .     | .     |
| .      | .         | 2p1. | .   | Score=0.9 | rs7540104.       | .      | .     | .     |
| .      | ENST0000. | 2q2. | .   | .         | .                | .      | .     | .     |
| .      | ENST0000. | 2q3. | .   | .         | .                | .      | .     | .     |
| .      | ENST0000. | 2q3. | .   | .         | .                | .      | .     | .     |
| .      | ENST0000. | 2q3. | Sc. | .         | rs9825331.       | .      | .     | .     |
| .      | ENST0000. | 3p2. | .   | .         | .                | .      | .     | .     |
| .      | ENST0000. | 3p2. | .   | .         | Score rs1309395. | .      | .     | .     |
| .      | ENST0000. | 3p2. | .   | .         | .                | .      | .     | .     |
| .      | ENST0000. | 3p2. | .   | .         | rs3710999.       | .      | .     | .     |
| .      | ENST0000. | 3p2. | .   | .         | Score.           | .      | .     | .     |
| QRICH  | ENST0000. | 3p2. | .   | .         | .                | .      | .     | .     |
| BSN:NI | ENST0000. | 3p2. | Sc. | .         | .                | .      | .     | .     |
| BSN:NI | ENST0000. | 3p2. | Sc. | .         | .                | .      | .     | .     |
| .      | ENST0000. | 3p2. | .   | .         | .                | .      | .     | .     |
| .      | ENST0000. | 3q1. | .   | .         | .                | .      | .     | .     |
| .      | ENST0000. | 3q2. | .   | .         | rs5729372.       | .      | 0.    | .     |
| .      | ENST0000. | 4p1. | .   | .         | rs4970287 ID:    | .      | .     | .     |
| .      | .         | 4q1. | .   | .         | Score rs1456513. | .      | 0.002 | 0.001 |
| AFF1:1 | ENST0000. | 4q2. | .   | .         | .                | .      | .     | .     |
| .      | ENST0000. | 4q2. | .   | .         | .                | .      | .     | .     |
| FAT4:1 | ENST0000. | 4q2. | .   | .         | rs3727861 ID:    | .      | .     | .     |
| GALNT  | ENST0000. | 4q3. | Sc. | .         | .                | .      | .     | .     |
| .      | ENST0000. | 4q3. | .   | .         | Score.           | .      | .     | .     |
| .      | ENST0000. | 5q3. | .   | .         | .                | .      | .     | .     |
| .      | ENST0000. | 5q3. | .   | .         | .                | .      | .     | .     |
| .      | ENST0000. | 6p2. | .   | .         | .                | .      | .     | .     |
| .      | ENST0000. | 6p2. | .   | .         | .                | .      | .     | .     |
| .      | ENST0000. | 6q1. | .   | .         | rs9010911.       | .      | .     | .     |
| .      | ENST0000. | 6q2. | .   | .         | .                | .      | .     | .     |
| .      | ENST0000. | 7p2. | .   | Score=0.9 | rs1544467 ID:    | .      | .     | .     |
| .      | ENST0000. | 7p2. | .   | .         | .                | .      | .     | .     |
| .      | ENST0000. | 7p1. | .   | .         | .                | .      | .     | .     |
| .      | ENST0000. | 7p1. | .   | .         | .                | .      | .     | .     |
| TBRG4  | ENST0000. | 7p1. | .   | .         | .                | .      | .     | .     |
| .      | .         | 7p1. | .   | Score=0.9 | rs1929995.       | .      | 0.002 | 0.001 |
| .      | ENST0000. | 7q1. | .   | Score=0.9 | .                | .      | .     | .     |
| HIP1:1 | ENST0000. | 7q1. | Sc. | .         | .                | .      | .     | .     |





|                  |      |           |        |                      |   |   |       |       |   |
|------------------|------|-----------|--------|----------------------|---|---|-------|-------|---|
| TRAPP ENST0000.  | 2p2. | .         | .      | .                    | . | . | .     | .     | . |
| TRAPP ENST0000.  | 2p2. | .         | .      | .                    | . | . | .     | .     | . |
| NBAS: ENST0000.  | 2p2. | .         | .      | .                    | . | . | .     | .     | . |
| NLRC4 ENST0000.  | 2p2. | .         | .      | .                    | . | . | .     | .     | . |
| . ENST0000.      | 2p1. | .         | .      | .                    | . | . | .     | .     | . |
| . .              | 2q1. | .         | .      | Score rs2015850 ID:  | . | . | .     | .     | . |
| ZAP70: ENST0000. | 2q1. | Sc.       | .      | .                    | . | . | .     | .     | . |
| . ENST0000.      | 2q1. | Score=0.9 | .      | rs2008974.           | . | . | .     | .     | . |
| . ENST0000.      | 2q1. | .         | .      | rs7249504 ID:        | . | . | 0.042 | 0.042 | . |
| . ENST0000.      | 2q1. | .         | .      | .                    | . | . | .     | .     | . |
| TTN:N ENST0000.  | 2q3. | .         | .      | ID:                  | . | . | .     | .     | . |
| . ENST0000.      | 2q3. | .         | .      | .                    | . | . | .     | .     | . |
| . ENST0000.      | 2q3. | .         | .      | rs5520376)           | . | . | .     | .     | . |
| . ENST0000.      | 2q3. | .         | .      | .                    | . | . | .     | .     | . |
| . ENST0000.      | 2q3. | .         | .      | Score rs1816528)     | . | . | 0.002 | 0.001 | . |
| PRSS5 ENST0000.  | 2q3. | Sc.       | .      | .                    | . | . | .     | .     | . |
| . ENST0000.      | 3p2. | .         | .      | Score.               | . | . | .     | .     | . |
| . ENST0000.      | 3p2. | .         | .      | rs9185110.           | . | . | .     | .     | . |
| . ENST0000.      | 3p2. | .         | .      | rs3735896.           | . | . | .     | .     | . |
| . ENST0000.      | 3q1. | .         | .      | .                    | . | . | .     | .     | . |
| DCBLD ENST0000.  | 3q1. | .         | .      | .                    | . | . | .     | .     | . |
| . ENST0000.      | 3q1. | .         | .      | .                    | . | . | .     | .     | . |
| . ENST0000.      | 3q1. | .         | .      | .                    | . | . | .     | .     | . |
| COL6A ENST0000.  | 3q2. | .         | .      | rs1456223 ID:        | . | . | 0.    | .     | . |
| PIK3C/ ENST0000. | 3q2. | Score=0.9 | .      | rs1048860 ID: Patho. | . | . | .     | .     | . |
| . ENST0000.      | 4p1. | .         | .      | .                    | . | . | .     | .     | . |
| . ENST0000.      | 4p1. | Score=0.9 | .      | rs4018318.           | . | . | .     | .     | . |
| . ENST0000.      | 4p1. | .         | .      | .                    | . | . | .     | .     | . |
| . ENST0000.      | 4p1. | .         | .      | .                    | . | . | .     | .     | . |
| . ENST0000.      | 4q1. | .         | .      | .                    | . | . | .     | .     | . |
| . ENST0000.      | 4q3. | .         | .      | .                    | . | . | .     | .     | . |
| . .              | 4q3. | Score=0.9 | Score. | .                    | . | . | .     | .     | . |
| . ENST0000.      | 5p1. | Score=0.9 | .      | .                    | . | . | .     | .     | . |
| . ENST0000.      | 5q1. | .         | .      | .                    | . | . | .     | .     | . |
| . ENST0000.      | 5q2. | .         | .      | .                    | . | . | .     | .     | . |
| . ENST0000.      | 5q3. | .         | .      | .                    | . | . | .     | .     | . |
| PCDHC ENST0000.  | 5q3. | .         | .      | rs7735798 ID:        | . | . | .     | .     | . |
| FGF18: ENST0000. | 5q3. | .         | .      | ID:                  | . | . | .     | .     | . |
| TBC1D ENST0000.  | 5q3. | .         | .      | .                    | . | . | .     | .     | . |
| BTNL9: ENST0000. | 5q3. | .         | .      | rs3761176 ID:        | . | . | .     | .     | . |
| . ENST0000.      | 6p2. | Sc.       | .      | .                    | . | . | .     | .     | . |
| DHX16 ENST0000.  | 6p2. | Sc.       | .      | rs1419237 ID:        | . | . | .     | .     | . |
| . ENST0000.      | 6q2. | .         | .      | rs3687466.           | . | . | .     | .     | . |
| RAET1 ENST0000.  | 6q2. | Score=0.9 | .      | .                    | . | . | .     | .     | . |
| OPRM' ENST0000.  | 6q2. | .         | .      | .                    | . | . | .     | .     | . |
| TIAM2: ENST0000. | 6q2. | .         | .      | rs2014763.           | . | . | .     | .     | . |
| . .              | 6q2. | Score=0.9 | .      | rs3759780.           | . | . | .     | .     | . |
| . ENST0000.      | 7p1. | .         | .      | rs7676901.           | . | . | .     | .     | . |
| DDX56 ENST0000.  | 7p1. | .         | .      | .                    | . | . | .     | .     | . |
| . ENST0000.      | 7p1. | Score=0.9 | .      | rs6246184 ID:        | . | . | .     | .     | . |
| . ENST0000.      | 7p1. | Score=0.9 | .      | rs2013722 ID:        | . | . | .     | .     | . |
| . ENST0000.      | 7q1. | Score=0.9 | .      | .                    | . | . | .     | .     | . |
| . .              | 7q1. | Score=0.9 | .      | .                    | . | . | .     | .     | . |
| MUC12 ENST0000.  | 7q2. | Score=0.9 | .      | rs7611895.           | . | . | .     | .     | . |



|                 |      |     |           |           |               |   |   |       |       |
|-----------------|------|-----|-----------|-----------|---------------|---|---|-------|-------|
| . ENST0000.     | 16p. | .   | .         | .         | .             | . | . | .     | .     |
| SPN:NIENST0000. | 16p. | .   | .         | .         | .             | . | . | .     | .     |
| ITGAX:ENST0000. | 16p. | .   | Score=0.9 | .         | rs1450253 ID: | . | . | .     | .     |
| SLC12:ENST0000. | 16q. | .   | .         | .         | .             | . | . | .     | .     |
| . ENST0000.     | 16q. | .   | .         | .         | rs1135006 ID: | . | . | .     | .     |
| SGSM2:ENST0000. | 17p. | Sc. | .         | .         | rs7673846     | . | . | .     | .     |
| GLP2R:ENST0000. | 17p. | Sc. | .         | .         | rs7606360     | . | . | .     | .     |
| . ENST0000.     | 17p. | .   | .         | .         | .             | . | . | .     | .     |
| . ENST0000.     | 17q. | .   | .         | .         | rs5549220     | . | . | 0     | .     |
| . ENST0000.     | 17q. | .   | .         | .         | .             | . | . | .     | .     |
| . ENST0000.     | 17q. | .   | .         | .         | .             | . | . | .     | .     |
| . ENST0000.     | 17q. | .   | .         | .         | rs7400170     | . | . | 0     | .     |
| . ENST0000.     | 18p. | .   | Score=0.9 | .         | rs7837587 ID: | . | . | .     | .     |
| . ENST0000.     | 18q. | .   | .         | .         | .             | . | . | .     | .     |
| . ENST0000.     | 18q. | .   | .         | .         | .             | . | . | .     | .     |
| . ENST0000.     | 18q. | .   | Score=0.9 | .         | rs1466769     | . | . | 0.013 | 0.011 |
| . ENST0000.     | 18q. | .   | .         | .         | rs5634889     | . | . | 0     | .     |
| ABCA7:ENST0000. | 19p. | .   | .         | .         | .             | . | . | .     | .     |
| ACTL9:ENST0000. | 19p. | .   | .         | .         | .             | . | . | .     | .     |
| . ENST0000.     | 19p. | .   | Score.    | .         | .             | . | . | .     | .     |
| . ENST0000.     | 19p. | .   | .         | .         | .             | . | . | .     | .     |
| . ENST0000.     | 19p. | .   | .         | .         | .             | . | . | .     | .     |
| . ENST0000.     | 19p. | .   | Score=0.9 | .         | .             | . | . | .     | .     |
| . ENST0000.     | 19q. | .   | Score.    | .         | .             | . | . | .     | .     |
| . ENST0000.     | 19q. | .   | Score=0.9 | Score     | rs7125437     | . | . | .     | .     |
| . ENST0000.     | 19q. | .   | .         | .         | rs1820521     | . | . | 0     | .     |
| OXT:NIENST0000. | 20p. | .   | .         | .         | .             | . | . | .     | .     |
| GFRA4:ENST0000. | 20p. | Sc. | .         | .         | .             | . | . | .     | .     |
| . ENST0000.     | 20p. | .   | .         | .         | .             | . | . | .     | .     |
| GATA5:ENST0000. | 20q. | .   | .         | .         | .             | . | . | .     | .     |
| . ENST0000.     | 21p. | .   | Score=0.9 | .         | rs7964453     | . | . | .     | .     |
| . ENST0000.     | 21p. | .   | Score=0.9 | .         | rs3735529 ID: | . | . | 0.061 | 0.062 |
| . ENST0000.     | 21p. | .   | Score=0.9 | Score     | rs7280383 ID: | . | . | .     | .     |
| . ENST0000.     | 21q. | .   | Score.    | .         | .             | . | . | .     | .     |
| CLIC6:ENST0000. | 21q. | .   | .         | .         | rs7738143     | . | . | .     | .     |
| TRAPP:ENST0000. | 21q. | Sc. | .         | .         | rs5510648     | . | . | 0     | .     |
| PCBP3:ENST0000. | 21q. | Sc. | .         | .         | .             | . | . | .     | .     |
| COL6A:ENST0000. | 21q. | Sc. | .         | .         | .             | . | . | .     | .     |
| . ENST0000.     | 22q. | .   | Score=0.9 | .         | rs1262847     | . | . | .     | .     |
| . ENST0000.     | 22q. | .   | Score=0.9 | .         | rs86008 ID:   | . | . | .     | .     |
| RNF21:ENST0000. | 22q. | .   | .         | .         | .             | . | . | .     | .     |
| . ENST0000.     | Xp2. | .   | .         | .         | .             | . | . | .     | .     |
| BEND2:ENST0000. | Xp2. | .   | .         | .         | rs7787173     | . | . | .     | .     |
| . ENST0000.     | Xp1. | .   | .         | .         | .             | . | . | .     | .     |
| . ENST0000.     | Xq1. | .   | .         | .         | .             | . | . | .     | .     |
| . ENST0000.     | Xq1. | .   | Score.    | .         | .             | . | . | .     | .     |
| OGT:N:ENST0000. | Xq1. | Sc. | .         | .         | ID:           | . | . | .     | .     |
| . ENST0000.     | Xq2. | .   | Score=0.9 | .         | .             | . | . | .     | .     |
| . ENST0000.     | Xq2. | .   | Score=0.9 | .         | .             | . | . | .     | .     |
| . ENST0000.     | Xq2. | .   | .         | .         | rs9176062     | . | . | .     | .     |
| . ENST0000.     | Xq2. | .   | Score     | rs9279180 | .             | . | . | .     | .     |
| IRAK1:ENST0000. | Xq2. | .   | .         | .         | .             | . | . | .     | .     |
| ACTL8:ENST0000. | 1p3. | .   | .         | .         | rs3718451 ID: | . | . | .     | .     |

|         |           |      |     |           |                     |     |   |   |   |       |       |
|---------|-----------|------|-----|-----------|---------------------|-----|---|---|---|-------|-------|
| WDTC    | ENST0000. | 1p3. | Sc. | .         | .                   | .   | . | . | . | .     | .     |
| .       | ENST0000. | 1p3. | .   | .         | rs7678484.          | .   | . | . | . | .     | .     |
| GJA4:N  | ENST0000. | 1p3. | .   | .         | rs7603609 ID:       | .   | . | . | . | .     | .     |
| .       | ENST0000. | 1p3. | .   | .         | .                   | .   | . | . | . | .     | .     |
| TESK2   | ENST0000. | 1p3. | Sc. | .         | .                   | .   | . | . | . | .     | .     |
| .       | ENST0000. | 1p3. | .   | .         | .                   | .   | . | . | . | .     | .     |
| .       | ENST0000. | 1p3. | .   | .         | .                   | .   | . | . | . | .     | .     |
| AMPD2   | ENST0000. | 1p1. | .   | .         | .                   | .   | . | . | . | .     | .     |
| .       | ENST0000. | 1p1. | .   | .         | Score rs7547967 ID: | .   | . | . | . | .     | .     |
| .       | ENST0000. | 1q2. | .   | Score=0.9 | Score rs7528408.    | .   | . | . | . | .     | .     |
| .       | ENST0000. | 1q2. | .   | Score=0.9 | Score rs2009307 ID: | .   | . | . | . | .     | .     |
| .       | ENST0000. | 1q2. | .   | Score=0.9 | rs3726923 ID:       | .   | . | . | . | .     | .     |
| .       | ENST0000. | 1q2. | .   | Score=0.9 | Score rs8799825.    | .   | . | . | . | .     | .     |
| .       | ENST0000. | 1q3. | .   | .         | .                   | .   | . | . | . | .     | .     |
| .       | ENST0000. | 1q4. | .   | .         | rs7756172.          | .   | . | . | . | .     | .     |
| TPO:NI  | ENST0000. | 2p2. | .   | .         | rs7587514.          | .   | . | . | . | .     | .     |
| .       | ENST0000. | 2q3. | Sc. | .         | .                   | .   | . | . | . | .     | .     |
| .       | ENST0000. | 2q3. | .   | .         | .                   | .   | . | . | . | .     | .     |
| .       | ENST0000. | 2q3. | .   | .         | rs1411611.          | .   | . | . | . | .     | .     |
| CELSR   | ENST0000. | 3p2. | .   | .         | rs1156481 ID:       | .   | . | . | . | 0.    | .     |
| .       | ENST0000. | 3q1. | .   | Score=0.9 | .                   | .   | . | . | . | .     | .     |
| .       | ENST0000. | 3q2. | .   | .         | .                   | .   | . | . | . | .     | .     |
| ABCC5   | ENST0000. | 3q2. | .   | .         | .                   | .   | . | . | . | .     | .     |
| PDE6B   | ENST0000. | 4p1. | Sc. | .         | .                   | .   | . | . | . | .     | .     |
| GAK:NI  | ENST0000. | 4p1. | .   | .         | .                   | .   | . | . | . | .     | .     |
| .       | ENST0000. | 4p1. | .   | .         | rs7307061.          | .   | . | . | . | 0.    | .     |
| .       | .         | 4p1. | .   | Score=0.9 | rs8796734.          | .   | . | . | . | .     | .     |
| .       | ENST0000. | 4q2. | .   | .         | Score rs7690288.    | .   | . | . | . | .     | .     |
| .       | ENST0000. | 4q3. | .   | .         | .                   | .   | . | . | . | .     | .     |
| .       | .         | 4q3. | .   | .         | Score rs1003755.    | .   | . | . | . | .     | .     |
| .       | ENST0000. | 5p1. | .   | .         | .                   | .   | . | . | . | .     | .     |
| RASGF   | ENST0000. | 5q1. | Sc. | .         | .                   | .   | . | . | . | .     | .     |
| APC:NI  | ENST0000. | 5q2. | .   | .         | .                   | .   | . | . | . | .     | .     |
| .       | ENST0000. | 5q3. | .   | .         | .                   | .   | . | . | . | .     | .     |
| .       | ENST0000. | 5q3. | .   | .         | .                   | .   | . | . | . | .     | .     |
| WWC1    | ENST0000. | 5q3. | Sc. | .         | .                   | .   | . | . | . | .     | .     |
| ZSCAN   | ENST0000. | 6p2. | .   | .         | .                   | .   | . | . | . | .     | .     |
| POU5F   | ENST0000. | 6p2. | .   | .         | rs7589117.          | .   | . | . | . | .     | .     |
| .       | ENST0000. | 6p1. | .   | .         | .                   | .   | . | . | . | .     | .     |
| TBX18:  | ENST0000. | 6q1. | Sc. | .         | .                   | ID: | . | . | . | .     | .     |
| .       | .         | 6q2. | .   | .         | rs441907 ID:        | .   | . | . | . | .     | .     |
| .       | ENST0000. | 7q2. | .   | .         | .                   | .   | . | . | . | .     | .     |
| .       | ENST0000. | 7q2. | .   | .         | .                   | .   | . | . | . | .     | .     |
| C7orf6( | ENST0000. | 7q3. | .   | .         | .                   | ID: | . | . | . | .     | .     |
| ZNF70!  | ENST0000. | 8p2. | .   | Score=0.9 | .                   | .   | . | . | . | .     | .     |
| CSMD3   | ENST0000. | 8q2. | Sc. | .         | .                   | .   | . | . | . | .     | .     |
| .       | ENST0000. | 8q2. | .   | .         | Score.              | .   | . | . | . | .     | .     |
| NFIB:N  | ENST0000. | 9p2. | Sc. | .         | .                   | .   | . | . | . | .     | .     |
| FKTN:!  | ENST0000. | 9q3. | .   | .         | .                   | .   | . | . | . | .     | .     |
| OR1L6   | ENST0000. | 9q3. | .   | .         | .                   | .   | . | . | . | .     | .     |
| .       | ENST0000. | 10p. | .   | Score=0.9 | .                   | .   | . | . | . | .     | .     |
| .       | .         | 10q. | .   | Score=0.9 | rs3125109 ID:       | .   | . | . | . | .     | .     |
| .       | ENST0000. | 10q. | .   | .         | .                   | .   | . | . | . | .     | .     |
| .       | ENST0000. | 10q. | .   | .         | Score rs7905448 ID: | .   | . | . | . | 0.347 | 0.355 |

|                  |      |     |           |                  |     |       |       |   |   |
|------------------|------|-----|-----------|------------------|-----|-------|-------|---|---|
| . ENST0000.      | 10q. | .   | .         | .                | .   | .     | .     | . | . |
| MXI1:N ENST0000. | 10q. | .   | .         | rs7646688 ID:    | .   | .     | .     | . | . |
| . ENST0000.      | 10q. | .   | .         | .                | .   | .     | .     | . | . |
| DNHD1 ENST0000.  | 11p. | .   | .         | .                | .   | .     | .     | . | . |
| . ENST0000.      | 11p. | .   | Score=0.9 | .                | .   | .     | .     | . | . |
| UNKNC ENST0000.  | 11q. | .   | .         | rs3775202.       | .   | .     | .     | . | . |
| TRIM6 ENST0000.  | 11q. | .   | Score=0.9 | .                | .   | .     | .     | . | . |
| . ENST0000.      | 11q. | .   | .         | Score rs7690752. | .   | .     | .     | . | . |
| SIDT2: ENST0000. | 11q. | Sc. | .         | rs7585846 ID:    | .   | .     | .     | . | . |
| ITPR2: ENST0000. | 12p. | .   | .         | .                | .   | .     | .     | . | . |
| DDN:N ENST0000.  | 12q. | .   | .         | .                | .   | .     | .     | . | . |
| . ENST0000.      | 12q. | .   | .         | .                | .   | .     | .     | . | . |
| CDX2: ENST0000.  | 13q. | .   | .         | .                | .   | .     | .     | . | . |
| . ENST0000.      | 14q. | .   | Score=0.9 | rs2259899 ID:    | .   | .     | .     | . | . |
| . ENST0000.      | 14q. | .   | Score=0.9 | rs2014187.       | .   | .     | .     | . | . |
| ZFP36L ENST0000. | 14q. | Sc. | .         | .                | .   | .     | .     | . | . |
| UNC13 ENST0000.  | 15q. | .   | .         | .                | .   | .     | .     | . | . |
| CACNA ENST0000.  | 16p. | .   | .         | rs7764738.       | .   | .     | .     | . | . |
| . ENST0000.      | 16p. | .   | .         | .                | .   | .     | .     | . | . |
| . ENST0000.      | 16q. | .   | Score=0.9 | rs2013540 ID:    | .   | 0.324 | 0.285 | . | . |
| . ENST0000.      | 18p. | .   | Score=0.9 | rs7502623 ID:    | .   | 0.623 | 0.62  | . | . |
| . ENST0000.      | 19p. | .   | .         | rs7589667 ID:    | .   | .     | .     | . | . |
| COL5A ENST0000.  | 19p. | .   | .         | .                | .   | .     | .     | . | . |
| . ENST0000.      | 19q. | .   | Score.    | .                | .   | .     | .     | . | . |
| . ENST0000.      | 19q. | .   | .         | .                | .   | .     | .     | . | . |
| . ENST0000.      | 19q. | .   | .         | .                | .   | .     | .     | . | . |
| SBK3: ENST0000.  | 19q. | Sc. | .         | rs9019919.       | .   | .     | .     | . | . |
| ANKEF ENST0000.  | 20p. | .   | .         | .                | .   | .     | .     | . | . |
| ANKEF ENST0000.  | 20p. | .   | .         | rs7770803.       | .   | .     | .     | . | . |
| AAR2: ENST0000.  | 20q. | .   | .         | rs7792821.       | .   | .     | .     | . | . |
| DONSC ENST0000.  | 21q. | .   | .         | .                | .   | .     | .     | . | . |
| TBC1D ENST0000.  | 22q. | Sc. | .         | .                | .   | .     | .     | . | . |
| . ENST0000.      | Xp2. | .   | Score.    | .                | .   | .     | .     | . | . |
| . ENST0000.      | Xp2. | .   | Score=0.9 | .                | .   | .     | .     | . | . |
| ARAF: ENST0000.  | Xp1. | Sc. | .         | .                | .   | .     | .     | . | . |
| . ENST0000.      | Xp1. | .   | .         | .                | .   | .     | .     | . | . |
| . ENST0000.      | Xq2. | .   | .         | .                | .   | .     | .     | . | . |
| . ENST0000.      | Xq2. | .   | .         | .                | .   | .     | .     | . | . |
| . ENST0000.      | Xq2. | .   | .         | .                | .   | .     | .     | . | . |
| ZIC3:N ENST0000. | Xq2. | .   | .         | .                | ID: | .     | .     | . | . |
| . ENST0000.      | Xq2. | .   | .         | .                | .   | .     | .     | . | . |
| . ENST0000.      | Xq2. | .   | Score=0.9 | rs4013617.       | .   | .     | .     | . | . |
| . ENST0000.      | Xq2. | .   | .         | .                | ID: | .     | .     | . | . |



| 1000g2 | esp | Ex/ | Ex/ | SIF | Polyp | Polyp | Mutε  | gerp | CAC  | Nov  | Nov | INF                     | (FOR                 | ACa | ACa | 01T | Ori_REF | Ori_ALT |
|--------|-----|-----|-----|-----|-------|-------|-------|------|------|------|-----|-------------------------|----------------------|-----|-----|-----|---------|---------|
|        |     |     |     |     |       |       |       |      |      | 0    | 0.2 | SOM                     | GT:/0:8,(0/1:11,3:3  | T   |     |     | C       |         |
|        |     |     |     |     |       |       |       |      |      |      |     | SOM                     | GT:/0:11 0/1:7,4:37  | A   |     |     | G       |         |
|        |     |     |     |     |       |       |       |      |      |      |     | SOM                     | GT:/0:50 0/1:83,12:3 | C   |     |     | T       |         |
|        |     |     |     |     |       |       |       |      |      |      |     | SOM                     | GT:/0:13 0/1:19,3:37 | C   |     |     | T       |         |
|        |     | ##  | 0   | 0.9 | 0.001 | 0.001 | 1.00  |      |      |      |     | SOM                     | GT:/0:71 0/1:135,26  | G   |     |     | A       |         |
|        |     |     |     |     |       |       |       |      |      |      |     | SOM                     | GT:/0:21 0/1:35,13:3 | C   |     |     | T       |         |
|        |     |     |     |     |       |       |       |      |      | 0    |     | SOM                     | GT:/0:8,(0/1:3,2:37  | A   |     |     | G       |         |
|        |     |     |     |     |       |       |       |      |      | 0    |     | SOM                     | GT:/0:14 0/1:13,3:28 | G   |     |     | T       |         |
|        |     |     |     |     |       |       |       |      |      | 0    | 0   | SOM                     | GT:/0:30 0/1:69,5:31 | C   |     |     | G       |         |
|        |     |     |     |     |       |       |       |      |      | 0    | 0   | SOM                     | GT:/0:17 0/1:26,4:37 | T   |     |     | C       |         |
|        |     |     |     |     |       |       |       |      |      | 0    |     | SOM                     | GT:/0:25 0/1:37,3:37 | G   |     |     | A       |         |
|        |     |     |     |     |       |       |       |      |      |      |     | SOM                     | GT:/0:11 0/1:20,6:20 | A   |     |     | C       |         |
|        |     | 0   | ##  | 0   |       |       |       | 3.3  | 4.54 |      |     | SOM                     | GT:/0:19 0/1:54,14:3 | G   |     |     | A       |         |
|        |     |     |     |     |       |       |       |      |      |      |     | SOM                     | GT:/0:49 0/1:83,13:3 | G   |     |     | A       |         |
|        |     |     |     |     |       |       |       |      |      |      |     | SOM                     | GT:/0:14 0/1:26,14:3 | A   |     |     | C       |         |
|        |     |     |     |     |       |       |       |      |      |      |     | SOM                     | GT:/0:13 0/1:20,7:37 | G   |     |     | A       |         |
|        |     |     |     |     |       |       |       |      |      |      |     | SOM                     | GT:/0:10 0/1:21,3:37 | A   |     |     | T       |         |
|        |     |     |     |     |       |       |       |      |      |      |     | DB;GT:/0:23 0/1:27,3:37 | G                    |     |     | A   |         |         |
|        |     |     |     |     |       |       |       |      |      | 0    | 0   | SOM                     | GT:/0:18 0/1:24,3:37 | A   |     |     | C       |         |
|        |     |     |     |     |       |       |       |      |      | 0    |     | SOM                     | GT:/0:9,(0/1:16,4:37 | T   |     |     | C       |         |
|        |     |     |     |     |       |       |       |      |      | 0    | 0.1 | SOM                     | GT:/0:17 0/1:18,4:37 | G   |     |     | A       |         |
|        |     |     |     |     |       |       |       |      |      | 0    | 0.3 | SOM                     | GT:/0:12 0/1:14,3:37 | C   |     |     | G       |         |
|        |     |     |     |     |       |       |       |      |      | 0    |     | SOM                     | GT:/0:42 0/1:52,4:34 | A   |     |     | T       |         |
|        |     |     |     |     |       |       |       |      |      | 0    | 0.1 | SOM                     | GT:/0:30 0/1:46,6:37 | C   |     |     | G       |         |
|        |     |     |     |     |       |       |       |      |      |      |     | SOM                     | GT:/0:43 0/1:74,6:37 | G   |     |     | A       |         |
| 0.005  |     |     |     |     |       |       |       |      |      | 0    | 0   | SOM                     | GT:/0:8,(0/1:10,4:37 | C   |     |     | T       |         |
|        |     |     |     |     |       |       |       | 4.8  | 4.02 |      |     | SOM                     | GT:/0:11 0/1:244,50  | T   |     |     | C       |         |
|        |     |     |     |     |       |       |       |      |      | 0.1  | 0.5 | SOM                     | GT:/0:8,(0/1:4,2:37  | T   |     |     | C       |         |
|        |     |     |     |     |       |       |       |      |      | 0    |     | SOM                     | GT:/0:15 0/1:37,5:34 | A   |     |     | G       |         |
|        |     |     |     |     |       |       |       |      |      |      |     | SOM                     | GT:/0:13 0/1:166,6:3 | G   |     |     | T       |         |
|        |     |     |     |     |       |       |       |      |      | 0    |     | SOM                     | GT:/0:37 0/1:64,4:37 | G   |     |     | A       |         |
|        |     |     |     |     |       |       |       |      |      |      |     | SOM                     | GT:/0:36 0/1:48,31:3 | C   |     |     | T       |         |
|        |     |     |     |     |       |       |       |      |      |      |     | SOM                     | GT:/0:57 0/1:65,5:31 | C   |     |     | G       |         |
|        |     |     |     |     |       |       |       |      |      | 0    | 0.4 | SOM                     | GT:/0:14 0/1:17,9:37 | G   |     |     | A       |         |
| 0.014  |     |     |     |     |       |       |       |      |      | 0    |     | DB;GT:/0:40 0/1:89,4:37 | A                    |     |     | C   |         |         |
|        |     | ##  | 0   |     |       |       |       |      |      |      |     | SOM                     | GT:/0:12 0/1:160,70  | C   |     |     | T       |         |
| 0.759  |     |     |     |     |       |       |       |      |      | 0.2  | 0.7 | SOM                     | GT:/0:9,(0/1:18,4:37 | C   |     |     | T       |         |
|        |     | 0   | 0   | 0   | 0.2   | 0.006 | 0.001 | 1,N  |      | 0    | 0   | SOM                     | GT:/0:21 0/1:33,3:37 | T   |     |     | G       |         |
|        |     | ##  |     |     | 0.1   | 0.002 | 0.003 | 1,D  | 3.5  | 3.54 |     | SOM                     | GT:/0:15 0/1:190,11  | G   |     |     | A       |         |
|        |     |     |     |     |       |       |       |      |      |      |     | SOM                     | GT:/0:24 0/1:45,21:3 | G   |     |     | T       |         |
|        |     |     |     |     |       |       |       |      | 1.82 | 0    |     | SOM                     | GT:/0:17 0/1:31,9:15 | A   |     |     | C       |         |
|        |     |     |     |     |       |       |       |      |      |      |     | SOM                     | GT:/0:49 0/1:64,22:3 | A   |     |     | C       |         |
|        |     | 0   | 0   |     |       |       |       |      |      | 0    | 0.1 | SOM                     | GT:/0:54 0/1:111,5:3 | A   |     |     | G       |         |
|        |     |     |     |     |       |       |       |      |      | 0.2  | 0.1 | DB;GT:/0:64 0/1:130,6:3 | A                    |     |     | G   |         |         |
|        |     |     |     |     |       |       |       |      |      | 0.1  | 0.1 | DB;GT:/0:28 0/1:62,7:37 | G                    |     |     | T   |         |         |
| 0.066  |     |     |     |     |       |       |       |      |      | 0    | 0   | DB;GT:/0:24 0/1:21,7:37 | C                    |     |     | A   |         |         |
|        |     |     |     |     |       |       |       |      |      | 0    |     | SOM                     | GT:/0:14 0/1:9,3:37  | G   |     |     | A       |         |
|        |     |     |     |     |       |       |       |      |      |      |     | SOM                     | GT:/0:8,(0/1:6,2:37  | C   |     |     | T       |         |
|        |     |     |     |     | 0.1   | 0.168 | 0.087 | 1,D  | 3.4  | 2.35 |     | SOM                     | GT:/0:10 0/1:149,65  | A   |     |     | G       |         |
|        |     |     |     |     |       |       |       |      |      | 0.1  | 0.2 | SOM                     | GT:/0:66 0/1:95,5:37 | T   |     |     | G       |         |

|       |   |    |     |       |       |       |      |                          |                          |                          |                          |   |   |
|-------|---|----|-----|-------|-------|-------|------|--------------------------|--------------------------|--------------------------|--------------------------|---|---|
|       |   |    |     |       |       | 0     | 0    | SOM GT:/0:8,(0/1:11,4:27 | A                        | G                        |                          |   |   |
| 0.739 | 1 | 1  |     |       |       | 0     | 0    | SOM GT:/0:25 0/1:19,6:37 | T                        | C                        |                          |   |   |
|       |   |    | 0.0 | 0.965 | 0.998 | 1,N   |      | SOM GT:/0:12 0/1:186,34  | C                        | A                        |                          |   |   |
|       |   |    |     |       |       |       |      | SOM GT:/0:19 0/1:37,3:37 | C                        | T                        |                          |   |   |
|       |   |    | 0.0 | 0.232 | 0.347 | 1.00  | 5.5  | 2.28                     |                          | T                        |                          |   |   |
|       |   |    |     |       |       |       |      | SOM GT:/0:57 0/1:104,17  | A                        | T                        |                          |   |   |
|       |   |    |     |       |       |       |      | SOM GT:/0:20 0/1:35,7:18 | T                        | G                        |                          |   |   |
|       |   |    | 0.0 | 0.006 | 0.006 | 0.81  | 4.4  | 2.83                     |                          | T                        |                          |   |   |
|       |   |    | 0.8 | 0.004 | 0.0   | B     | 0.98 | 2.4                      |                          | G                        |                          |   |   |
|       |   | ## | 0   |       |       |       |      | SOM GT:/0:38 0/1:50,25:3 | T                        | G                        |                          |   |   |
|       |   |    |     |       |       |       |      | SOM GT:/0:54 0/1:93,4:37 | C                        | T                        |                          |   |   |
|       |   |    |     |       |       |       |      | SOM GT:/0:44 0/1:78,38:3 | C                        | T                        |                          |   |   |
|       |   |    |     |       |       |       | 0    |                          | SOM GT:/0:32 0/1:67,4:37 | A                        | C                        |   |   |
|       |   |    |     |       |       |       | 0    |                          | SOM GT:/0:29 0/1:53,15:1 | T                        | G                        |   |   |
|       |   |    |     |       |       |       | 3.4  |                          |                          | G                        | G                        |   |   |
|       |   |    | 0.3 | 0.12  | 0.167 | 1.00  | 5.7  | 2.23                     |                          | G                        | G                        |   |   |
|       |   |    |     |       |       |       |      |                          | SOM GT:/0:22 0/1:31,29:3 | C                        | G                        |   |   |
|       |   |    |     |       |       |       |      |                          | SOM GT:/0:10 0/1:226,71  | G                        | A                        |   |   |
|       | 0 | 0  | 0   | 0.0   | 0.997 | 1.0,D | 1.00 | 4.9                      | 5.22                     |                          | T                        |   |   |
| 2E-04 | 0 | 0  | 0   | 0.0   | 0.399 | 0.932 | 1,N  |                          |                          |                          | T                        |   |   |
|       |   |    |     |       |       |       |      | 1.45                     |                          |                          | G                        |   |   |
|       |   |    |     |       |       |       |      |                          | SOM GT:/0:44 0/1:68,12:3 | G                        | A                        |   |   |
| 4E-04 | 0 |    |     |       |       |       |      | 0                        | 0                        | DB;S                     | T                        |   |   |
|       |   |    |     |       |       |       |      |                          | GT:/0:62 0/1:139,10      | G                        | T                        |   |   |
|       |   |    |     |       |       |       |      |                          | SOM GT:/0:12 0/1:19,4:37 | C                        | G                        |   |   |
|       |   | ## | 0   |       |       |       |      |                          | SOM GT:/0:39 0/1:54,6:32 | C                        | T                        |   |   |
|       |   |    | 1.0 | 0.129 | 0.478 | 1.00  | 5.9  |                          |                          |                          | A                        |   |   |
|       |   |    |     |       |       |       |      |                          | SOM GT:/0:27 0/1:45,20:3 | G                        | A                        |   |   |
|       |   |    |     |       |       |       |      |                          | SOM GT:/0:15 0/1:28,3:37 | C                        | T                        |   |   |
|       |   |    |     |       |       |       |      | 0                        | 0.2                      | SOM GT:/0:16 0/1:10,6:37 | T                        | C |   |
|       |   |    |     |       |       |       |      | 0                        | 0                        | SOM GT:/0:16 0/1:29,5:37 | C                        | T |   |
|       |   |    |     |       |       |       |      | 0.2                      | 0.2                      | DB;S                     | T                        | T |   |
|       |   |    |     |       |       |       |      |                          | GT:/0:24 0/1:38,4:37     | C                        | T                        |   |   |
|       |   |    |     |       |       |       |      | 0                        |                          | SOM GT:/0:22 0/1:27,6:17 | T                        | G |   |
|       |   |    |     |       |       |       |      | 0                        | 0                        | SOM GT:/0:9,(0/1:2,3:28: | C                        | T |   |
|       |   |    |     |       |       |       |      | 0                        |                          | SOM GT:/0:10 0/1:15,4:37 | G                        | A |   |
|       |   |    | 0.1 |       |       | 0.94  |      |                          |                          | SOM GT:/0:36 0/1:63,20:3 | C                        | T |   |
|       | 0 | ## | 0   |       |       |       |      | 0                        |                          | SOM GT:/0:19 0/1:27,13:3 | C                        | T |   |
|       |   |    |     |       |       |       |      |                          |                          | SOM GT:/0:44 0/1:57,7:37 | C                        | T |   |
|       |   |    |     |       |       |       |      | 0                        | 0                        | DB;S                     | T                        | C |   |
|       |   |    |     |       |       |       |      |                          | GT:/0:51 0/1:170,7:3     | T                        | C                        |   |   |
|       |   |    |     |       |       |       |      |                          | SOM GT:/0:40 0/1:119,6:3 | G                        | A                        |   |   |
|       |   |    |     |       |       |       |      |                          | SOM GT:/0:21 0/1:55,11:3 | C                        | A                        |   |   |
|       |   |    |     |       |       |       |      | 0                        | 0                        | SOM GT:/0:36 0/1:120,8:3 | A                        | G |   |
|       |   |    |     |       |       |       |      | 2.36                     |                          |                          | G                        | G |   |
|       |   |    |     |       |       |       |      | 0.1                      | 0.2                      | SOM GT:/0:11 0/1:34,5:21 | T                        | G |   |
|       |   |    |     |       |       |       |      |                          |                          | SOM GT:/0:16 0/1:37,5:37 | T                        | C |   |
|       |   |    |     |       |       |       |      |                          |                          | SOM GT:/0:67 0/1:88,4:37 | C                        | G |   |
|       |   |    |     |       |       |       |      |                          |                          | SOM GT:/0:26 0/1:54,25:3 | A                        | G |   |
|       |   | ## | 0   |       |       |       |      |                          |                          | SOM GT:/0:48 0/1:109,20  | C                        | T |   |
|       |   |    |     |       |       |       |      | 1.72                     |                          |                          | T                        | T |   |
|       |   | ## | 0   | 0.0   | 0.998 | 1.0,D | 1,D  | 5.7                      | 3.22                     |                          | T                        | T |   |
|       |   |    |     |       |       |       |      | 1.61                     | 0.1                      | 0                        | SOM GT:/0:9,(0/1:12,6:37 | A | C |
|       |   |    |     |       |       |       |      |                          |                          | 0                        | DB;S                     | T | C |
| 2E-04 |   |    |     |       |       |       |      |                          |                          | GT:/0:22 0/1:35,5:31     | G                        | C |   |
|       |   |    | 0.4 | 0.001 | 0.0   | B     | 0.99 |                          |                          | SOM GT:/0:37 0/1:43,15:3 | G                        | A |   |
|       |   |    |     |       |       |       |      |                          |                          | SOM GT:/0:51 0/1:40,36:3 | T                        | G |   |
|       |   |    |     |       |       |       |      |                          |                          | SOM GT:/0:15 0/1:19,5:37 | T                        | C |   |
|       |   |    | 0.0 | 0.991 | 0.998 | 1,D   | 5.2  | 4.56                     |                          | SOM GT:/0:30 0/1:66,5:37 | A                        | G |   |
|       |   |    |     |       |       |       |      |                          |                          | SOM GT:/0:8,(0/1:13,8:37 | C                        | T |   |
|       |   |    |     |       |       |       |      |                          |                          | SOM GT:/0:87 0/1:114,54  | T                        | A |   |
|       |   |    |     |       |       |       |      | 0                        | 0                        | SOM GT:/0:10 0/1:17,6:37 | T                        | C |   |
|       |   |    | 0.1 | 0.01  | 0.063 | 1,N   |      |                          |                          | SOM GT:/0:22 0/1:38,11:3 | C                        | T |   |
|       |   | ## | 0   |       |       |       |      |                          |                          | SOM GT:/0:81 0/1:132,7:3 | G                        | A |   |

|       |   |    |     |       |                 |                  |      |      |      |                            |                            |   |
|-------|---|----|-----|-------|-----------------|------------------|------|------|------|----------------------------|----------------------------|---|
|       |   |    |     |       |                 |                  |      |      |      | SOM GT:/0:65 0/1:78,45:3 G | A                          |   |
| 0.038 | 0 | 0  | 0   |       |                 |                  |      |      |      | DB;:GT:/0:43 0/1:63,8:37 C | T                          |   |
|       |   |    |     |       |                 |                  |      |      | 0    | 0                          | SOM GT:/0:23 0/1:42,4:37 C | T |
|       |   |    |     |       |                 |                  |      |      |      |                            | SOM GT:/0:11 0/1:24,9:13 G | T |
| 4E-04 |   |    |     |       |                 |                  |      |      |      |                            | DB;:GT:/0:19 0/1:40,3:37 G | C |
|       |   |    |     |       |                 |                  |      |      |      |                            | SOM GT:/0:38 0/1:60,27:3 G | A |
|       |   |    |     |       |                 |                  |      |      |      |                            | SOM GT:/0:23 0/1:176,6:3 C | T |
| 0.125 |   |    |     |       |                 |                  |      |      | 0    | 0                          | SOM GT:/0:8,(0/1:22,3:37 C | T |
| 0.016 |   |    |     |       |                 |                  |      |      | 0    | 0                          | SOM GT:/0:10 0/1:20,4:37 G | C |
|       |   |    |     |       |                 |                  |      |      |      |                            | SOM GT:/0:12 0/1:58,16:3 C | T |
|       |   |    | 0.0 | 0.367 | 0.883           | 1,N              |      |      |      |                            | SOM GT:/0:10 0/1:143,81 A  | C |
|       |   |    |     |       |                 |                  |      |      | 0    |                            | DB;:GT:/0:22 0/1:64,5:37 G | T |
|       |   |    |     |       |                 |                  |      |      |      |                            | SOM GT:/0:52 0/1:66,7:35 G | T |
|       |   |    |     |       |                 |                  |      |      |      |                            | SOM GT:/0:90 0/1:91,17:3 G | A |
| 0.098 |   |    |     |       |                 |                  |      |      | 0    |                            | SOM GT:/0:28 0/1:41,4:37 G | A |
|       |   |    |     |       |                 |                  |      |      | 0    |                            | SOM GT:/0:30 0/1:42,4:37 C | G |
|       |   |    |     |       |                 |                  |      |      | 0    |                            | SOM GT:/0:12 0/1:12,6:35 G | A |
|       |   |    |     |       |                 |                  |      |      |      |                            | SOM GT:/0:34 0/1:70,5:37 G | T |
|       |   | ## | 0   |       |                 |                  |      |      |      |                            | SOM GT:/0:41 0/1:74,7:37 G | A |
|       | 0 | 0  | 0   |       |                 |                  |      |      | 0.1  | 0.1                        | SOM GT:/0:39 0/1:92,7:37 G | C |
|       |   | ## | 0   | 0.0   | 0.994           | 1.0,D 1,D        | 4.6  | 3.91 |      |                            | SOM GT:/0:49 0/1:81,12:3 G | A |
|       |   |    |     |       |                 |                  | 2.4  |      |      |                            | SOM GT:/0:69 0/1:70,35:3 G | A |
|       |   |    | 0   | 0     |                 |                  |      |      | 0    | 0                          | SOM GT:/0:88 0/1:131,7:3 A | G |
|       |   |    | 0   | 0     | 0.0             | 1.0,D 1.0,D 1.00 | 4.9  | 4.26 | 0    | 0                          | SOM GT:/0:10 0/1:177,10 C  | T |
|       |   |    |     |       |                 |                  | 2.11 |      |      |                            | SOM GT:/0:21 0/1:29,3:37 C | T |
|       |   |    |     |       |                 |                  |      |      | 0.3  | 0.4                        | SOM GT:/0:11 0/1:8,3:28: C | T |
|       |   |    |     |       |                 |                  |      |      | 0.3  | 0.4                        | SOM GT:/0:12 0/1:7,3:33: T | C |
|       |   |    |     |       |                 |                  |      |      |      |                            | SOM GT:/0:64 0/1:1256,3 C  | A |
|       |   |    |     |       |                 |                  |      |      |      |                            | SOM GT:/0:10 0/1:10,5:37 A | G |
|       |   |    |     |       |                 |                  |      |      | 0    |                            | SOM GT:/0:15 0/1:21,6:17 A | C |
|       |   |    |     | 0.0   | 0.833           | 0.699            | 1,D  | 5.6  | 4.01 |                            | SOM GT:/0:12 0/1:18,7:18 T | G |
| 4E-04 |   |    |     |       |                 |                  |      |      |      |                            | SOM GT:/0:10 0/1:16,11:3 G | A |
|       |   |    |     |       |                 |                  |      |      | 0    |                            | SOM GT:/0:14 0/1:67,5:37 A | G |
|       |   |    |     |       |                 |                  |      |      |      |                            | SOM GT:/0:16 0/1:15,8:33 T | C |
| 0.001 | 0 | 0  | 0   |       |                 |                  |      |      | 0    | 0                          | SOM GT:/0:35 0/1:50,8:37 A | T |
|       |   | 0  | 0   |       |                 |                  |      |      |      |                            | DB;:GT:/0:38 0/1:115,5:3 T | C |
|       |   |    |     |       |                 |                  |      |      | 0    | 0                          | DB;:GT:/0:55 0/1:89,4:37 T | C |
|       |   |    |     |       |                 |                  |      |      | 0.1  | 0.2                        | SOM GT:/0:12 0/1:21,6:37 C | A |
|       |   |    |     |       |                 |                  |      |      | 0    | 0.1                        | SOM GT:/0:9,(0/1:10,3:37 G | A |
|       |   |    | 0   | 0     |                 |                  |      |      | 0    | 0                          | DB;:GT:/0:50 0/1:119,6:3 A | C |
|       |   |    |     |       |                 |                  |      |      |      |                            | SOM GT:/0:17 0/1:226,10 G  | A |
|       |   |    |     |       |                 |                  |      |      | 0    | 0.1                        | SOM GT:/0:9,(0/1:13,7:37 G | A |
|       |   |    |     |       |                 |                  | 3.7  |      |      |                            | SOM GT:/0:85 0/1:98,58:3 C | T |
|       |   |    |     |       |                 |                  | 5.6  | 2.81 |      |                            | SOM GT:/0:39 0/1:61,10:1 T | G |
|       |   | ## | 0   |       |                 |                  |      |      |      |                            | SOM GT:/0:85 0/1:115,53 A  | G |
|       |   | ## | 0   |       |                 |                  |      |      |      |                            | SOM GT:/0:11 0/1:171,53 C  | T |
|       |   |    |     | 0.0   | 1.0,D 1.0,D 1,D | 5.7              | 5.41 |      |      |                            | SOM GT:/0:55 0/1:70,32:3 G | A |
|       |   |    |     |       |                 |                  |      |      |      |                            | DB;:GT:/0:37 0/1:72,5:37 T | G |
|       |   |    |     | 0.1   | 0.022           | 0.02             | 1,N  |      |      |                            | SOM GT:/0:31 0/1:29,5:37 C | T |
|       |   |    |     | 0.0   | 0.996           | 1.0,D 1,D        | 5.3  | 4.51 |      |                            | SOM GT:/0:18 0/1:27,13:3 G | A |
|       |   | ## | 0   | 0.1   | 0.001           | 0.002            | 1,N  |      | 0    |                            | SOM GT:/0:67 0/1:84,37:3 G | A |
|       |   | ## | 0   |       |                 |                  |      |      |      |                            | SOM GT:/0:12 0/1:189,82 C  | T |
|       |   |    | 0   | 0     |                 |                  |      |      | 0    |                            | DB;:GT:/0:45 0/1:74,4:37 G | T |
|       |   |    |     |       |                 |                  |      |      |      |                            | SOM GT:/0:24 0/1:35,14:3 C | T |

|       |    |    |     |       |       |       |      |       |                              |                            |                             |   |
|-------|----|----|-----|-------|-------|-------|------|-------|------------------------------|----------------------------|-----------------------------|---|
|       |    |    |     |       |       |       |      | 0 0.4 | SOM GT:/0:8,(0/1:3,4:37: A   | C                          |                             |   |
| 2E-04 |    |    |     |       |       |       |      | 0     | SOM GT:/0:54 0/1:83,14:3 C   | T                          |                             |   |
|       | 0  | 0  |     |       |       |       |      | 0     | SOM GT:/0:39 0/1:59,5:37 T   | A                          |                             |   |
|       | ## | 0  |     |       |       | 5.4   | 2.57 |       | SOM GT:/0:94 0/1:144,42 C    | T                          |                             |   |
|       |    |    |     |       |       |       |      |       | SOM GT:/0:9,(0/1:3,3:24: C   | A                          |                             |   |
|       |    |    |     |       |       | 2.7   |      |       | SOM GT:/0:90 0/1:133,26 C    | T                          |                             |   |
| 2E-04 | 0  | ## | 0   |       |       |       |      |       | SOM GT:/0:12 0/1:191,27 C    | T                          |                             |   |
| 2E-04 | ## | ## | 0   | 0.1   | 0.056 | 0.685 | 1,N  | 4.4   | SOM GT:/0:44 0/1:55,19:3 G   | A                          |                             |   |
|       |    |    |     |       |       |       |      |       | SOM GT:/0:17 0/1:20,4:37 G   | T                          |                             |   |
|       |    |    |     |       |       | 2.1   |      |       | SOM GT:/0:51 0/1:53,7:20 A   | C                          |                             |   |
|       |    |    |     |       |       |       |      | 0     | 0 SOM GT:/0:38 0/1:72,5:37 C | T                          |                             |   |
|       |    |    |     |       |       |       |      |       | SOM GT:/0:20 0/1:9,3:28: A   | G                          |                             |   |
|       |    |    |     |       |       |       |      |       | SOM GT:/0:22 0/1:37,24:3 G   | A                          |                             |   |
|       |    |    |     |       |       |       |      |       | SOM GT:/0:9,(0/1:14,6:37 G   | T                          |                             |   |
|       |    |    |     |       |       |       |      | 0     | 0 SOM GT:/0:11 0/1:19,3:37 A | T                          |                             |   |
|       |    |    |     |       |       |       |      |       | SOM GT:/0:8,(0/1:18,9:35 G   | A                          |                             |   |
|       |    |    |     |       |       |       |      |       | SOM GT:/0:8,(0/1:16,3:37 T   | G                          |                             |   |
|       |    |    |     |       |       |       |      |       | SOM GT:/0:84 0/1:141,48 G    | A                          |                             |   |
|       |    |    | 0.0 | 0.295 | 0.594 | 0.99  |      | 2.32  | 0                            | SOM GT:/0:43 0/1:79,5:37 T | A                           |   |
|       |    |    |     |       |       |       |      |       | 0                            | SOM GT:/0:20 0/1:33,13:1 T | G                           |   |
|       |    |    |     |       |       | 2.4   |      |       | 0                            | SOM GT:/0:20 0/1:33,13:1 T | G                           |   |
|       |    | ## | 0   |       |       |       |      | 2.22  |                              | SOM GT:/0:10 0/1:137,62 C  | T                           |   |
| 0.001 | 0  | 0  | 0   | 0.0   | 0.029 | 0.595 | 0.98 | 5.2   | 2.47                         | 0                          | SOM GT:/0:43 0/1:87,23:3 C  | T |
|       |    |    |     |       |       |       |      |       |                              |                            | SOM GT:/0:13 0/1:251,18 G   | T |
|       |    | ## |     | 0.1   | 0.001 | 0.002 | 1,N  |       |                              | 0                          | SOM GT:/0:89 0/1:175,16 C   | T |
| 0.155 |    |    |     |       |       |       |      |       | 0.1                          | 0.1                        | DB;S GT:/0:47 0/1:94,5:34 T | C |
| 0.205 |    |    |     |       |       |       |      |       | 0.1                          | 0                          | SOM GT:/0:19 0/1:56,4:37 T  | C |
|       |    |    |     |       |       |       |      |       |                              | 0                          | SOM GT:/0:66 0/1:77,9:37 C  | G |
|       |    |    |     | 0.0   | 0.949 | 0.994 | 1,D  | 5.2   | 4.41                         |                            | SOM GT:/0:46 0/1:36,41:3 A  | C |
|       |    |    |     |       |       |       |      |       | 0                            | 0.1                        | SOM GT:/0:9,(0/1:5,2:37: T  | C |
|       |    |    |     |       |       |       |      |       |                              | 0                          | SOM GT:/0:8,(0/1:17,3:37 A  | G |
|       |    |    |     |       |       |       |      |       |                              |                            | SOM GT:/0:25 0/1:28,14:3 G  | A |
|       |    |    |     |       |       | 1.67  |      |       |                              |                            | SOM GT:/0:22 0/1:42,22:3 G  | C |
|       |    |    |     |       |       | 3.6   |      |       |                              |                            | SOM GT:/0:47 0/1:71,33:3 C  | T |
|       |    |    |     |       |       | 1.42  |      |       | 0                            |                            | SOM GT:/0:55 0/1:116,5:3 A  | C |
|       |    |    |     |       |       |       |      |       |                              |                            | SOM GT:/0:21 0/1:36,5:37 G  | A |
|       |    |    |     |       |       |       |      |       |                              |                            | SOM GT:/0:15 0/1:349,13 C   | T |
|       |    |    |     |       |       |       |      |       |                              |                            | SOM GT:/0:15 0/1:53,4:37 C  | T |
|       |    |    |     |       |       | 3.2   | 1.26 |       |                              |                            | SOM GT:/0:42 0/1:65,27:3 C  | T |
|       |    |    |     | 0.0   | 0.967 | 0.993 | 0.99 | 3.4   | 1.91                         |                            | SOM GT:/0:91 0/1:163,16 C   | A |
|       |    |    |     |       |       |       |      |       | 0                            | 0                          | SOM GT:/0:22 0/1:37,3:37 G  | A |
|       |    |    |     |       |       |       |      |       | 0                            | 0                          | SOM GT:/0:16 0/1:22,3:33 C  | T |
|       |    |    |     |       |       |       |      |       |                              | 0                          | SOM GT:/0:8,(0/1:5,2:37: G  | A |
|       |    |    |     |       |       |       |      |       |                              | 0                          | SOM GT:/0:8,(0/1:7,3:37: C  | T |
|       |    |    |     |       |       |       |      |       | 0                            | 0                          | SOM GT:/0:11 0/1:13,3:37 G  | T |
|       |    |    |     | 0.0   | 0.131 | 0.164 | 0.82 | 3.6   | 2.01                         |                            | SOM GT:/0:88 0/1:106,76 C   | T |
|       |    |    |     |       |       | 3.6   |      |       |                              | 0                          | SOM GT:/0:11 0/1:10,6:20 A  | C |
|       |    |    |     |       |       |       |      |       |                              | 0                          | SOM GT:/0:11 0/1:11,5:19 A  | C |
|       |    |    |     |       |       |       |      |       |                              |                            | SOM GT:/0:33 0/1:44,32:3 G  | A |
|       |    |    |     |       |       | 2.8   | 1.36 |       |                              |                            | SOM GT:/0:18 0/1:33,13:3 G  | A |
|       |    |    |     |       |       |       |      |       |                              |                            | SOM GT:/0:13 0/1:15,11:3 T  | G |
|       |    | ## | 0   | 0.0   | 0.352 | 0.934 | 1,D  | 4.3   | 1.26                         |                            | SOM GT:/0:89 0/1:100,51 G   | A |
|       |    |    |     |       |       |       |      | 1.47  |                              |                            | SOM GT:/0:24 0/1:47,3:33 G  | T |
|       |    |    |     |       |       |       |      |       | 0.1                          | 0.3                        | SOM GT:/0:8,(0/1:2,3:33: C  | T |

|       |    |           |       |      |      |      |                         |                         |                      |                      |   |   |
|-------|----|-----------|-------|------|------|------|-------------------------|-------------------------|----------------------|----------------------|---|---|
|       |    |           |       | 0.1  | 0    | SOM  | GT:/0:11 0/1:14,6:3E    | A                       |                      |                      |   |   |
|       |    |           |       |      | 0    | 0.4  | DB;GT:/0:22 0/1:22,3:37 | C                       |                      |                      |   |   |
|       |    |           |       | 1.48 |      |      | SOM                     | GT:/0:47 0/1:1228,6:C   | A                    |                      |   |   |
|       |    |           |       |      | 0    | 0    | SOM                     | GT:/0:10 0/1:28,3:37    | G                    |                      |   |   |
|       |    |           |       |      | 0    | 0.1  | SOM                     | GT:/0:42 0/1:87,4:37    | G                    |                      |   |   |
|       |    |           |       |      | 0    | 0    | SOM                     | GT:/0:40 0/1:75,12:3    | C                    | T                    |   |   |
|       |    |           |       |      |      |      | SOM                     | GT:/0:36 0/1:58,5:37    | C                    | T                    |   |   |
|       |    |           |       |      |      |      | SOM                     | GT:/0:70 0/1:179,8:3    | C                    | T                    |   |   |
|       |    |           |       |      |      |      | SOM                     | GT:/0:26 0/1:34,4:37    | T                    | C                    |   |   |
|       |    |           |       |      |      |      | SOM                     | GT:/0:18 0/1:52,10:3    | A                    | G                    |   |   |
| 0.379 |    |           |       |      | 0    | 0.2  | SOM                     | GT:/0:8,(0/1:12,5:37    | C                    | T                    |   |   |
|       |    |           |       | 1.74 |      |      | SOM                     | GT:/0:99 0/1:351,12     | G                    | A                    |   |   |
|       |    |           |       |      |      |      | SOM                     | GT:/0:20 0/1:638,22     | G                    | A                    |   |   |
|       | ## | 0 0.0     |       | 1,N  |      |      | SOM                     | GT:/0:11 0/1:379,32     | C                    | T                    |   |   |
|       |    | 0.0(0.993 | 1.0,D | 1.00 | 5.1  | 4.80 |                         | SOM                     | GT:/0:71 0/1:181,49  | G                    | A |   |
|       |    |           |       |      |      |      |                         | SOM                     | GT:/0:51 0/1:123,5:3 | T                    | C |   |
|       |    |           |       |      |      |      | 0                       | SOM                     | GT:/0:41 0/1:50,4:37 | C                    | A |   |
|       |    |           |       |      |      |      |                         | SOM                     | GT:/0:49 0/1:57,4:37 | G                    | A |   |
|       |    |           |       |      |      |      | 0                       | SOM                     | GT:/0:93 0/1:126,16  | G                    | T |   |
|       |    |           |       | 2.5  |      |      | 0                       | SOM                     | GT:/0:8,(0/1:54,4:34 | G                    | A |   |
|       |    |           |       |      |      |      |                         | SOM                     | GT:/0:16 0/1:56,11:3 | G                    | A |   |
|       |    |           |       |      |      |      |                         | SOM                     | GT:/0:49 0/1:155,10  | C                    | T |   |
| 4E-04 |    |           |       |      |      |      | 0                       | SOM                     | GT:/0:11 0/1:309,29  | G                    | A |   |
|       |    |           |       |      |      |      | 0                       | SOM                     | GT:/0:10 0/1:14,4:34 | A                    | G |   |
|       | 0  | 0 0.3     |       | 1,N  |      |      |                         | SOM                     | GT:/0:24 0/1:42,3:37 | A                    | G |   |
|       | 0  | 0         |       |      |      |      |                         | SOM                     | GT:/0:14 0/1:69,9:37 | A                    | G |   |
|       |    |           |       |      |      |      |                         | SOM                     | GT:/0:56 0/1:149,39  | G                    | A |   |
|       |    |           |       |      |      |      |                         | SOM                     | GT:/0:23 0/1:70,7:37 | C                    | T |   |
|       | ## | 0         |       |      | 1.60 |      | 0                       | SOM                     | GT:/0:89 0/1:235,14  | C                    | T |   |
|       |    |           |       | 3.8  |      |      |                         | SOM                     | GT:/0:10 0/1:219,69  | G                    | A |   |
| 8E-04 |    |           |       |      |      |      | 0                       | 0                       | SOM                  | GT:/0:26 0/1:79,4:37 | C | T |
|       |    |           |       |      |      |      |                         | DB;GT:/0:24 0/1:36,3:37 | T                    | C                    |   |   |
|       |    |           |       |      |      |      | 0                       | DB;GT:/0:34 0/1:42,3:37 | T                    | C                    |   |   |
|       |    |           |       |      |      |      |                         | DB;GT:/0:23 0/1:31,3:37 | T                    | C                    |   |   |
|       |    |           |       |      |      |      |                         | DB;GT:/0:56 0/1:107,5:3 | T                    | C                    |   |   |
|       |    |           |       |      |      |      | 0                       | DB;GT:/0:84 0/1:189,7:3 | T                    | A                    |   |   |
|       |    |           |       |      |      |      |                         | DB;GT:/0:31 0/1:25,5:34 | T                    | C                    |   |   |
|       |    |           |       |      |      |      | 0                       | SOM                     | GT:/0:42 0/1:131,5:3 | T                    | C |   |
|       |    |           |       |      |      |      | 0                       | SOM                     | GT:/0:25 0/1:50,4:37 | T                    | G |   |
|       |    |           |       |      |      |      |                         | SOM                     | GT:/0:40 0/1:80,4:37 | T                    | A |   |
|       |    |           |       |      |      |      | 0                       | DB;GT:/0:66 0/1:155,8:3 | T                    | A                    |   |   |
|       |    |           |       |      |      |      |                         | DB;GT:/0:49 0/1:97,5:37 | T                    | A                    |   |   |
|       |    |           |       |      |      |      | 0                       | DB;GT:/0:36 0/1:56,4:37 | T                    | C                    |   |   |
|       |    |           |       |      |      |      | 0                       | DB;GT:/0:47 0/1:73,5:37 | T                    | C                    |   |   |
|       |    |           |       |      |      |      | 0                       | DB;GT:/0:36 0/1:49,8:37 | T                    | C                    |   |   |
|       |    |           |       |      |      |      | 0                       | DB;GT:/0:44 0/1:102,5:3 | T                    | A                    |   |   |
|       |    |           |       |      |      |      | 0                       | SOM                     | GT:/0:20 0/1:37,4:37 | T                    | A |   |
|       |    |           |       |      |      |      |                         | DB;GT:/0:20 0/1:29,3:37 | T                    | G                    |   |   |
|       |    |           |       |      |      |      | 0                       | DB;GT:/0:36 0/1:68,4:37 | T                    | C                    |   |   |
|       |    |           |       |      |      |      | 0                       | DB;GT:/0:33 0/1:60,4:37 | T                    | A                    |   |   |
|       |    |           |       |      |      |      | 0                       | SOM                     | GT:/0:20 0/1:41,3:37 | T                    | G |   |
|       |    |           |       |      |      |      |                         | SOM                     | GT:/0:13 0/1:31,3:37 | T                    | C |   |
|       |    |           |       |      |      |      |                         | SOM                     | GT:/0:9,(0/1:17,7:17 | T                    | A |   |
|       |    |           |       | 1,A  | 5    | 5.87 |                         | SOM                     | GT:/0:76 0/1:74,21:3 | T                    | C |   |

|       |   |    |                    |       |       |           |                                    |   |
|-------|---|----|--------------------|-------|-------|-----------|------------------------------------|---|
|       |   |    |                    |       | 0     | 0         | SOM GT:/0:9,(0/1:5,4:24: C         | G |
|       |   |    | 0.010.58E0.99E 1,N | 2.8   |       |           | SOM GT:/0:49 0/1:47,40:3 C         | T |
|       |   | ## | 0                  |       |       | 1.43      | 0 SOM GT:/0:74 0/1:115,48 G        | A |
|       |   |    | 0.210.05E0.08E 1,D | 3.4   | 3.15  |           | SOM GT:/0:25 0/1:40,19:3 T         | C |
| 4E-04 | 0 | ## | 0                  | 0.5   | 0.007 | 0.09E0.99 | SOM GT:/0:93 0/1:133,64 G          | A |
|       |   |    |                    |       |       |           | SOM GT:/0:21 0/1:30,9:12 A         | C |
| 0.006 |   | 0  | 0                  |       |       |           | SOM GT:/0:13 0/1:217,10: C         | T |
|       |   |    |                    |       |       |           | SOM GT:/0:89 0/1:141,71 G          | A |
|       |   |    |                    |       |       |           | SOM GT:/0:63 0/1:114,5:3 G         | T |
|       |   |    |                    |       |       |           | 0 SOM GT:/0:28 0/1:55,4:37 C       | G |
|       |   |    |                    |       |       |           | 0 0 DB;S GT:/0:26 0/1:20,5:37 G    | T |
|       |   |    |                    |       |       |           | 0 SOM GT:/0:9,(0/1:12,3:37 C       | A |
|       |   |    |                    |       |       |           | 0 0 SOM GT:/0:33 0/1:53,4:37 T     | G |
|       |   |    |                    |       |       |           | 0 0 DB;S GT:/0:34 0/1:55,4:37 T    | G |
|       |   |    |                    |       |       |           | 0 SOM GT:/0:34 0/1:55,5:37 G       | A |
|       |   |    |                    |       |       |           | SOM GT:/0:10 0/1:5,2:37: G         | C |
|       |   |    |                    |       |       |           | SOM GT:/0:16 0/1:34,17:3 T         | A |
| 0.021 |   |    |                    |       |       |           | 0 0 DB;S GT:/0:37 0/1:58,13:3 A    | T |
|       |   |    |                    |       |       | 2.3       | 0 SOM GT:/0:44 0/1:84,16:1 T       | G |
|       |   |    |                    |       |       |           | 0 0.2 SOM GT:/0:34 0/1:82,5:37 G   | A |
|       |   |    |                    |       |       |           | 0 0.1 SOM GT:/0:77 0/1:132,5:3 T   | C |
|       |   |    |                    |       |       | 2.6       | SOM GT:/0:54 0/1:65,30:3 G         | A |
|       |   |    |                    |       |       |           | SOM GT:/0:37 0/1:39,9:14 T         | G |
|       |   |    |                    |       |       |           | SOM GT:/0:43 0/1:95,29:1 A         | C |
|       |   |    |                    |       |       | 5.5       | 2.32 SOM GT:/0:45 0/1:82,40:3 C    | T |
|       |   |    |                    |       |       |           | 0 SOM GT:/0:8,(0/1:1,2:37: T       | C |
|       |   |    |                    |       |       |           | 0 SOM GT:/0:10 0/1:143,6:3 C       | G |
|       |   |    |                    |       |       |           | SOM GT:/0:13 0/1:39,4:37 G         | A |
|       |   |    |                    |       |       |           | 0 SOM GT:/0:20 0/1:54,4:37 C       | G |
|       |   |    |                    |       |       |           | 0 SOM GT:/0:34 0/1:73,4:34 C       | T |
|       |   |    |                    |       |       |           | 0 SOM GT:/0:10 0/1:18,4:37 A       | G |
|       |   |    |                    |       |       |           | SOM GT:/0:19 0/1:57,6:37 G         | T |
|       |   |    |                    |       |       | 3.2       | SOM GT:/0:43 0/1:71,28:3 G         | A |
|       |   |    |                    |       |       |           | SOM GT:/0:10 0/1:29,11:3 G         | A |
|       |   |    |                    |       |       |           | SOM GT:/0:48 0/1:86,4:37 G         | T |
|       |   |    | 0.8                | 0.0,B | 0.0,B | 1,N       | 0 SOM GT:/0:10 0/1:213,39 G        | A |
|       |   |    |                    |       |       |           | SOM GT:/0:10 0/1:18,3:37 T         | C |
|       |   |    |                    |       |       |           | 0 DB;S GT:/0:20 0/1:33,26:3 G      | A |
|       |   |    |                    |       |       |           | SOM GT:/0:14 0/1:29,11:3 C         | T |
|       |   |    |                    |       |       |           | 0 SOM GT:/0:8,(0/1:7,3:37: C       | T |
|       |   |    |                    |       |       |           | 0.1 0.1 SOM GT:/0:28 0/1:20,7:3E G | A |
|       |   |    |                    |       |       |           | 0 0 SOM GT:/0:8,(0/1:13,3:37 G     | T |
|       |   |    |                    |       |       |           | 0 0 SOM GT:/0:10 0/1:11,4:34 G     | A |
|       |   |    |                    |       |       |           | 0 0 SOM GT:/0:14 0/1:30,5:37 A     | T |
|       |   |    |                    |       |       |           | SOM GT:/0:28 0/1:33,10:3 G         | A |
|       |   |    |                    |       |       |           | 0 0 SOM GT:/0:11 0/1:3,2:37: C     | A |
| 0.24  |   |    |                    |       |       |           | 0 0 SOM GT:/0:10 0/1:15,3:37 G     | A |
| 2E-04 |   | ## | 0                  |       |       |           | SOM GT:/0:53 0/1:136,13 C          | T |
|       |   |    |                    |       |       |           | SOM GT:/0:17 0/1:23,8:37 A         | G |
| 0.065 |   |    |                    |       |       |           | 0 DB;S GT:/0:36 0/1:81,5:37 C      | G |
|       |   |    |                    |       |       |           | 0 SOM GT:/0:36 0/1:81,5:37 T       | G |
|       |   |    |                    |       |       |           | 0 SOM GT:/0:56 0/1:76,8:37 A       | C |
|       |   |    |                    |       |       | 3         | SOM GT:/0:26 0/1:39,16:3 C         | T |
|       |   |    |                    |       |       | 3.3       | 3.32 SOM GT:/0:23 0/1:41,8:1E A    | C |

|       |    |    |       |       |       |      |      |      |                                   |   |
|-------|----|----|-------|-------|-------|------|------|------|-----------------------------------|---|
|       |    |    |       |       |       |      |      |      | SOM GT:/0:32 0/1:72,29:3 G        | A |
| 0.031 |    |    |       |       |       |      |      |      | SOM GT:/0:15 0/1:29,3:3 C         | T |
|       |    |    |       |       |       |      |      |      | SOM GT:/0:45 0/1:67,29:3 G        | A |
|       |    |    |       |       |       |      |      |      | SOM GT:/0:37 0/1:45,22:3 G        | A |
|       | ## | 0  |       |       |       |      |      |      | SOM GT:/0:17 0/1:34,5:31 C        | T |
|       |    |    |       |       |       |      |      | 0    | SOM GT:/0:8,(0/1:5,2:37: C        | T |
|       |    |    |       |       |       |      |      | 0    | 0 SOM GT:/0:8,(0/1:10,4:24 T      | C |
|       |    |    | 0.0   | 0.505 | 0.857 | 0.99 | 4.6  | 4.05 | SOM GT:/0:12 0/1:140,84 G         | A |
|       |    |    |       |       |       |      |      | 1.53 | DB;S GT:/0:20 0/1:41,21:3 G       | A |
|       |    |    |       |       |       |      |      |      | SOM GT:/0:26 0/1:23,3:37 C        | T |
|       |    | 0  | 0     |       |       |      |      |      | SOM GT:/0:45 0/1:90,17:3 C        | T |
|       | ## | 0  |       |       |       |      |      |      | SOM GT:/0:92 0/1:135,52 C         | T |
|       |    |    |       |       |       |      |      |      | SOM GT:/0:8,(0/1:20,4:37 A        | T |
|       |    |    |       |       |       |      |      |      | SOM GT:/0:12 0/1:9,4:37: T        | G |
|       |    |    |       |       |       |      |      | 4.4  | SOM GT:/0:26 0/1:40,12:3 C        | T |
|       |    |    |       |       |       |      |      | 3.1  | 1.56 SOM GT:/0:22 0/1:44,4:37 C   | T |
|       |    |    |       |       |       |      |      |      | SOM GT:/0:37 0/1:49,28:3 C        | T |
|       |    |    |       |       |       |      |      | 3.6  | 1.91 SOM GT:/0:15 0/1:232,91 G    | A |
|       | ## | 0  | 0.995 | 1.0,D | 1,N   |      |      |      | SOM GT:/0:79 0/1:132,44 G         | A |
|       |    |    | 0.0   | 0.04, | 0.48, | 0.99 |      | 1.45 | SOM GT:/0:14 0/1:294,15 C         | T |
|       |    |    | 0.6   | 0.004 | 0.005 | 0.99 |      |      | SOM GT:/0:40 0/1:83,7:3 C         | T |
|       |    |    |       |       |       |      |      |      | SOM GT:/0:12 0/1:180,58 C         | T |
|       |    |    |       |       |       |      |      |      | SOM GT:/0:32 0/1:32,121 G         | A |
|       |    |    | 0.0   | 0.433 | 0.884 | 1,D  | 5.2  | 3.32 | SOM GT:/0:90 0/1:146,78 C         | T |
|       |    |    | 0.1   | 0.039 | 0.107 | 1.00 | 5.3  | 4.84 | SOM GT:/0:64 0/1:122,64 C         | T |
| 0.002 |    |    |       |       |       |      |      |      | 0 0 SOM GT:/0:21 0/1:9,3:28: G    | A |
|       |    | 0  | 0     |       |       |      |      |      | 0 0.2 DB;S GT:/0:21 0/1:35,4:37 G | A |
|       |    |    |       |       |       |      |      |      | SOM GT:/0:22 0/1:29,4:37 C        | T |
| 0.034 |    |    |       |       |       |      | 1.65 | 0.1  | 0.2 SOM GT:/0:9,(0/1:20,4:37 C    | T |
|       |    |    |       |       |       |      |      |      | SOM GT:/0:10 0/1:20,9:37 A        | C |
| 4E-04 | ## | ## | 0     |       |       |      | 2.3  |      | SOM GT:/0:36 0/1:40,41:3 G        | A |
|       |    |    |       |       |       |      |      |      | SOM GT:/0:30 0/1:46,47:3 T        | C |
|       |    |    |       |       |       |      |      |      | SOM GT:/0:17 0/1:25,26:3 T        | C |
|       |    |    |       |       |       |      | 2.9  |      | SOM GT:/0:55 0/1:80,66:3 C        | T |
| 0.248 |    |    |       |       |       |      |      |      | 0 0.2 SOM GT:/0:12 0/1:5,3:37: G  | C |
|       |    |    |       |       |       |      |      |      | 0 0 SOM GT:/0:15 0/1:30,5:37 C    | A |
|       |    |    |       |       |       |      |      |      | 0 0 SOM GT:/0:8,(0/1:17,3:37 T    | G |
|       |    |    |       |       |       |      |      |      | 0 SOM GT:/0:33 0/1:63,4:34 A      | T |
|       |    |    |       |       |       |      |      |      | SOM GT:/0:22 0/1:61,5:37 T        | C |
|       |    |    |       |       |       |      |      |      | 0 0 SOM GT:/0:29 0/1:78,5:37 G    | C |
|       |    |    |       |       |       |      |      |      | SOM GT:/0:9,(0/1:15,5:37 G        | A |
|       |    |    |       |       |       |      |      |      | SOM GT:/0:35 0/1:106,6:3 C        | A |
|       |    |    |       |       |       |      |      |      | SOM GT:/0:35 0/1:107,6:3 A        | C |
|       |    |    |       |       |       |      |      | 0    | 0.3 SOM GT:/0:8,(0/1:5,3:37: A    | G |
|       |    |    |       |       |       |      |      |      | 0 SOM GT:/0:21 0/1:58,8:37 A      | C |
|       |    |    |       |       |       |      |      |      | 0 0 SOM GT:/0:23 0/1:30,4:37 C    | G |
|       |    |    |       |       |       |      |      |      | 0 0 SOM GT:/0:23 0/1:30,4:37 C    | T |
|       |    |    |       |       |       |      |      |      | SOM GT:/0:8,(0/1:18,14:3 C        | T |
|       |    |    |       |       |       |      |      | 0.1  | 0.2 SOM GT:/0:24 0/1:54,5:31 G    | A |
|       |    |    |       |       |       |      |      |      | 0 0.5 SOM GT:/0:8,(0/1:6,5:37: G  | A |
|       |    |    |       |       |       |      |      |      | 0 0.5 SOM GT:/0:10 0/1:7,5:37: G  | A |
|       |    |    |       |       |       |      |      |      | SOM GT:/0:17 0/1:37,5:21 A        | C |
|       | ## | 0  | 0.0   | 0.997 | 1.0,D | 1,D  | 5.7  | 5.14 | 0 SOM GT:/0:65 0/1:121,19 C       | T |
|       |    |    |       |       |       |      |      |      | SOM GT:/0:23 0/1:34,15:3 C        | T |

|       |    |   |       |            |            |            |       |            |      |                             |                             |                             |                            |   |
|-------|----|---|-------|------------|------------|------------|-------|------------|------|-----------------------------|-----------------------------|-----------------------------|----------------------------|---|
| .     | .  | . | .     | .          | .          | .          | .     | .          | .    | SOM GT:/0:19 0/1:38,7:17 C  | A                           |                             |                            |   |
| .     | .  | . | .     | .          | .          | .          | .     | .          | .    | SOM GT:/0:28 0/1:40,36:3 G  | T                           |                             |                            |   |
| .     | .  | . | .     | .          | .          | .          | .     | .          | .    | SOM GT:/0:19 0/1:43,24:3 G  | A                           |                             |                            |   |
| .     | .  | . | .     | .          | .          | .          | .     | .          | .    | SOM GT:/0:24 0/1:40,5:37 A  | G                           |                             |                            |   |
| .     | .  | . | .     | .          | .          | 3.7        | 2.73. | .          | .    | SOM GT:/0:58 0/1:72,42:3 C  | A                           |                             |                            |   |
| .     | .  | . | .     | .          | .          | .          | .     | .          | .    | SOM GT:/0:39 0/1:67,65:3 A  | G                           |                             |                            |   |
| .     | .  | . | .     | .          | .          | .          | .     | .          | .    | SOM GT:/0:11 0/1:36,4:37 C  | A                           |                             |                            |   |
| .     | .  | . | .     | .          | .          | .          | .     | .          | 0    | SOM GT:/0:8,(0/1:12,4:37 C  | T                           |                             |                            |   |
| .     | .  | . | .     | .          | .          | .          | .     | 0          | 0.2  | SOM GT:/0:8,(0/1:14,5:37 A  | T                           |                             |                            |   |
| .     | .  | . | .     | .          | .          | .          | .     | 0.1        | 0    | SOM GT:/0:13 0/1:47,19:3 A  | T                           |                             |                            |   |
| .     | .  | . | .     | .          | .          | .          | .     | 0.1        | 0    | SOM GT:/0:36 0/1:111,6:3 T  | C                           |                             |                            |   |
| 4E-04 | ## | 0 | 0.2   | 0.0010.008 | 1.00       | 2.3        | .     | .          | .    | SOM GT:/0:97 0/1:132,12: G  | A                           |                             |                            |   |
| .     | .  | . | .     | .          | .          | .          | .     | .          | .    | DB;S GT:/0:62 0/1:125,15 A  | C                           |                             |                            |   |
| .     | .  | . | .     | .          | .          | .          | .     | .          | .    | SOM GT:/0:23 0/1:32,3:37 C  | T                           |                             |                            |   |
| 2E-04 | .  | . | .     | .          | .          | .          | .     | .          | 0    | 0                           | SOM GT:/0:8,(0/1:6,9:34: C  | T                           |                            |   |
| .     | .  | . | .     | .          | .          | .          | 3     | 1.31.      | .    | SOM GT:/0:14 0/1:23,8:37 G  | C                           |                             |                            |   |
| 6E-04 | .  | . | .     | .          | .          | .          | .     | .          | 0    | SOM GT:/0:11 0/1:17,19:3 G  | A                           |                             |                            |   |
| .     | .  | . | 0.0   | 0.0540.102 | 1,N        | 3.6        | .     | .          | .    | SOM GT:/0:52 0/1:62,50:3 G  | T                           |                             |                            |   |
| .     | .  | . | .     | .          | .          | .          | .     | .          | .    | SOM GT:/0:8,(0/1:15,9:35 A  | G                           |                             |                            |   |
| .     | .  | . | .     | .          | .          | .          | .     | .          | .    | SOM GT:/0:45 0/1:10,58:3 T  | C                           |                             |                            |   |
| 0.005 | 0  | 0 | 0     | 0.4        | 0.0040.007 | 1,N        | .     | .          | 0    | 0                           | SOM GT:/0:79 0/1:66,33:3 C  | T                           |                            |   |
| .     | .  | . | .     | .          | .          | .          | 0.0   | 0.9610.999 | 1,D  | 5.1                         | 5.69.                       | .                           | SOM GT:/0:42 0/1:88,8:37 C | T |
| .     | .  | . | .     | .          | .          | .          | .     | .          | 0    | 0.1                         | SOM GT:/0:8,(0/1:0,2:37: T  | C                           |                            |   |
| .     | .  | . | .     | .          | .          | 1,D        | 5.2   | 4.50.      | .    | SOM GT:/0:13 0/1:31,21:3 G  | A                           |                             |                            |   |
| .     | .  | . | .     | .          | .          | .          | 5.2   | 1.86.      | .    | SOM GT:/0:9,(0/1:10,13:3 G  | A                           |                             |                            |   |
| .     | .  | . | 0     | 0          | 0.2        | 0.0020.001 | 1,D   | 4.8        | 4.41 | 0                           | 0                           | DB;S GT:/0:77 0/1:159,6:3 G | C                          |   |
| .     | .  | . | .     | .          | .          | .          | .     | .          | 0.2  | 0.3                         | DB;S GT:/0:27 0/1:78,4:37 G | A                           |                            |   |
| .     | ## | 0 | .     | .          | .          | .          | .     | .          | .    | SOM GT:/0:34 0/1:36,36:3 G  | A                           |                             |                            |   |
| .     | .  | . | .     | .          | .          | .          | 4.1   | .          | .    | SOM GT:/0:54 0/1:81,41:3 C  | T                           |                             |                            |   |
| .     | .  | . | .     | .          | .          | .          | .     | .          | .    | SOM GT:/0:28 0/1:26,18:3 C  | G                           |                             |                            |   |
| .     | .  | . | 0.0   | 0.9120.995 | 1,D        | 5.8        | 5.36. | .          | .    | DB;S GT:/0:19 0/1:62,173 G  | A                           |                             |                            |   |
| .     | .  | . | .     | .          | .          | .          | .     | .          | .    | SOM GT:/0:29 0/1:85,213 C   | G                           |                             |                            |   |
| .     | .  | . | .     | .          | .          | .          | .     | .          | .    | SOM GT:/0:55 0/1:397,59 A   | G                           |                             |                            |   |
| .     | .  | . | .     | .          | .          | .          | .     | .          | .    | SOM GT:/0:8,(0/1:93,35:3 G  | T                           |                             |                            |   |
| .     | .  | . | .     | .          | .          | .          | .     | .          | 0    | 0.3                         | DB;S GT:/0:31 0/1:244,8:3 A | G                           |                            |   |
| .     | .  | . | .     | .          | .          | .          | .     | .          | .    | SOM GT:/0:11 0/1:115,11: C  | T                           |                             |                            |   |
| .     | .  | . | 0.0   | .          | .          | 0.73       | 2.06. | .          | .    | SOM GT:/0:60 0/1:71,9:37 G  | T                           |                             |                            |   |
| .     | .  | . | .     | .          | .          | .          | .     | .          | .    | SOM GT:/0:30 0/1:412,11 G   | T                           |                             |                            |   |
| .     | .  | . | .     | .          | .          | .          | .     | .          | 0    | .                           | SOM GT:/0:57 0/1:95,7:37 C  | G                           |                            |   |
| .     | .  | . | .     | .          | .          | .          | .     | .          | .    | SOM GT:/0:18 0/1:10,14:3 C  | T                           |                             |                            |   |
| .     | .  | . | .     | .          | .          | .          | .     | .          | 0    | .                           | SOM GT:/0:8,(0/1:17,3:37 A  | G                           |                            |   |
| .     | .  | . | .     | .          | .          | .          | .     | .          | .    | SOM GT:/0:15 0/1:21,15:3 G  | A                           |                             |                            |   |
| .     | ## | . | .     | .          | .          | 2.4        | .     | .          | 0    | .                           | SOM GT:/0:11 0/1:313,25 C   | T                           |                            |   |
| .     | .  | . | 0.965 | 0.999      | .          | 4          | 5.22. | .          | .    | SOM GT:/0:22 0/1:565,40 C   | T                           |                             |                            |   |
| .     | .  | . | .     | .          | .          | .          | .     | .          | .    | SOM GT:/0:12 0/1:22,16:3 T  | C                           |                             |                            |   |
| .     | .  | . | .     | .          | .          | .          | 2.00. | .          | .    | SOM GT:/0:9,(0/1:31,5:37 G  | A                           |                             |                            |   |
| .     | .  | 0 | 0     | 0.4        | 0.0020.004 | 1,N        | .     | .          | 0    | 0                           | SOM GT:/0:60 0/1:142,9:3 T  | G                           |                            |   |
| .     | .  | . | .     | .          | .          | .          | .     | .          | .    | SOM GT:/0:16 0/1:16,12:3 G  | A                           |                             |                            |   |
| .     | ## | 0 | .     | .          | .          | .          | .     | .          | .    | SOM GT:/0:11 0/1:140,13: C  | T                           |                             |                            |   |
| .     | .  | . | .     | .          | .          | .          | .     | .          | 0    | .                           | SOM GT:/0:11 0/1:21,4:37 C  | G                           |                            |   |
| .     | .  | . | .     | .          | .          | .          | 1.84. | .          | .    | DB;S GT:/0:33 0/1:55,43:3 C | T                           |                             |                            |   |
| .     | .  | . | .     | .          | .          | .          | .     | .          | .    | SOM GT:/0:16 0/1:20,3:37 G  | A                           |                             |                            |   |
| .     | .  | . | .     | .          | .          | .          | .     | .          | 0    | 0                           | SOM GT:/0:20 0/1:48,4:37 G  | A                           |                            |   |
| .     | .  | . | .     | .          | .          | .          | .     | .          | 0    | .                           | SOM GT:/0:13 0/1:14,9:34 A  | G                           |                            |   |



|       |    |    |     |           |        |         |                                   |   |
|-------|----|----|-----|-----------|--------|---------|-----------------------------------|---|
|       |    |    |     |           |        | 0.      | SOMGT:/0:12 0/1:18,3:37A          | C |
| 0.038 |    |    |     |           |        | 0 0     | SOMGT:/0:12 0/1:34,6:37G          | C |
|       |    |    |     | 3.5 2.17  |        |         | SOMGT:/0:39 0/1:52,65:3C          | A |
| 0.237 |    |    |     |           |        | 0.2 0.4 | SOMGT:/0:8,(0/1:7,11:35T          | G |
|       |    |    |     |           |        |         | SOMGT:/0:20 0/1:27,18:3G          | A |
|       | ## | 0. |     |           |        | 0 0     | DB;SOMGT:/0:44 0/1:90,4:37G       | A |
| 4E-04 | 0  | 0  | 0.  |           |        |         | SOMGT:/0:23 0/1:50,49:3C          | A |
| 0.026 |    | 0  | 0.  |           |        | 0 0     | DB;SOMGT:/0:90 0/1:227,7:3A       | G |
| 0.047 |    | 0  | 0.  |           |        | 0.1 0.2 | SOMGT:/0:69 0/1:26,21:3T          | C |
|       |    |    |     |           |        |         | SOMGT:/0:33 0/1:58,4:37C          | T |
|       |    |    |     |           |        | 0 0     | DB;SOMGT:/0:62 0/1:265,9:3T       | A |
|       |    |    |     | 1,D       | 6 5.89 |         | SOMGT:/0:41 0/1:68,62:3G          | T |
|       |    |    |     |           |        |         | SOMGT:/0:15 0/1:32,6:20A          | C |
|       | ## | 0. |     |           |        |         | SOMGT:/0:36 0/1:55,53:3A          | G |
|       | 0  | 0  | 0.0 | 0.0,B     | 0.0,B  | 1,N     | SOMGT:/0:55 0/1:79,5:37C          | T |
|       |    |    |     |           |        | 0.      | SOMGT:/0:12 0/1:18,7:37G          | T |
|       |    |    |     |           |        | 0.      | SOMGT:/0:8,(0/1:23,5:37A          | G |
|       |    |    |     |           |        |         | SOMGT:/0:11 0/1:0,2:37:C          | T |
|       |    |    |     |           |        |         | DB;SOMGT:/0:76 0/1:166,10 G       | C |
|       |    |    |     |           |        | 0.      | SOMGT:/0:38 0/1:93,7:35C          | A |
|       |    |    |     |           |        | 0.      | SOMGT:/0:20 0/1:47,4:34G          | A |
|       |    |    |     |           |        |         | SOMGT:/0:74 0/1:100,5:3G          | A |
|       |    |    |     |           |        |         | SOMGT:/0:75 0/1:70,4:34C          | G |
|       |    |    |     |           |        |         | DB;SOMGT:/0:10 0/1:224,7:3G       | A |
|       |    |    |     |           |        |         | SOMGT:/0:21 0/1:36,6:37G          | T |
| 0.002 |    |    |     |           |        | 0 0     | SOMGT:/0:8,(0/1:13,3:37C          | T |
|       |    |    |     |           |        | 0 0     | SOMGT:/0:8,(0/1:6,2:37:T          | C |
|       |    |    |     | 4.9       |        |         | SOMGT:/0:57 0/1:93,71:3A          | G |
|       |    |    |     |           |        | 0 0     | SOMGT:/0:15 0/1:12,5:21T          | G |
|       |    |    |     |           |        | 0.      | SOMGT:/0:14 0/1:28,6:17T          | G |
|       |    |    |     |           |        | 0.      | SOMGT:/0:14 0/1:30,6:18T          | G |
|       |    |    |     |           |        | 0 0     | SOMGT:/0:8,(0/1:2,2:37:G          | C |
|       |    |    |     |           |        |         | SOMGT:/0:8,(0/1:16,11:3C          | T |
|       |    |    |     |           |        | 0 0     | SOMGT:/0:10 0/1:21,3:37C          | G |
|       |    |    |     |           |        | 0 0     | SOMGT:/0:12 0/1:24,7:35G          | A |
|       | ## | 0. |     |           |        | 0.      | SOMGT:/0:18 0/1:274,20 G          | A |
|       |    |    |     |           |        | 0.1 0.1 | SOMGT:/0:8,(0/1:22,5:37C          | G |
|       |    |    |     |           |        |         | SOMGT:/0:8,(0/1:28,3:37G          | A |
|       |    |    |     |           |        |         | SOMGT:/0:20 0/1:33,17:3G          | T |
|       |    |    |     |           |        |         | SOMGT:/0:23 0/1:59,5:37G          | C |
|       |    |    |     |           |        |         | DB;SOMGT:/0:43 0/1:104,5:3C       | T |
|       |    |    |     |           |        |         | SOMGT:/0:8,(0/1:7,7:37: G         | T |
|       |    |    |     |           |        |         | SOMGT:/0:80 0/1:109,10:G          | A |
|       |    |    |     | 2.2       |        |         | SOMGT:/0:17 0/1:35,20:3C          | T |
| 6E-04 |    |    |     |           |        | 0.      | SOMGT:/0:19 0/1:74,6:35G          | A |
| 2E-04 |    |    |     |           |        |         | SOMGT:/0:37 0/1:75,17:3C          | T |
|       | 0  | 0  | 0   | 1.0,0.013 | 0.004  | 1.00    | 0 0.3 DB;SOMGT:/0:20 0/1:46,3:37T | C |
|       |    |    |     |           |        | 0 0     | SOMGT:/0:12 0/1:28,6:32C          | A |
| 4E-04 |    |    |     |           |        | 0 0     | SOMGT:/0:13 0/1:22,6:37T          | A |
|       |    |    |     |           |        | 0 0     | SOMGT:/0:34 0/1:67,5:37G          | T |
|       |    |    |     |           |        | 0.1 0.2 | SOMGT:/0:8,(0/1:26,5:37C          | A |
| 0.321 |    |    |     |           |        | 0.1 0.2 | DB;SOMGT:/0:29 0/1:63,5:34A       | G |
|       |    |    |     |           |        | 0.      | SOMGT:/0:22 0/1:55,5:34G          | T |
| 6E-04 |    |    |     |           |        |         | SOMGT:/0:14 0/1:17,15:3G          | A |

|       |    |    |                        |          |         |                              |   |
|-------|----|----|------------------------|----------|---------|------------------------------|---|
|       |    |    |                        | 2.31     |         | SOMGT:/0:82 0/1:169,7:3 G    | A |
|       |    |    | 0.0,1.0,D 1.0,D 1,D    | 4.9 4.64 |         | SOMGT:/0:99 0/1:134,80 G     | A |
|       | ## | 0  |                        |          |         | SOMGT:/0:50 0/1:66,77:3 C    | T |
|       |    |    |                        |          | 0 0     | SOMGT:/0:15 0/1:10,5:31 C    | T |
|       |    |    |                        |          |         | SOMGT:/0:47 0/1:63,50:3 T    | G |
|       |    |    |                        |          | 0.1 0.3 | SOMGT:/0:8,(0/1:15,4:34 T    | A |
| 0.41  |    |    |                        |          |         | SOMGT:/0:8,(0/1:24,11:3 G    | C |
|       |    |    |                        |          |         | SOMGT:/0:43 0/1:120,8:3 T    | A |
|       |    |    |                        |          |         | SOMGT:/0:30 0/1:32,12:3 G    | A |
|       |    |    |                        |          |         | SOMGT:/0:52 0/1:73,50:3 C    | T |
| 0.156 |    |    |                        | 2.7      | 0.4 0.5 | DB;SOMGT:/0:31 0/1:50,49:3 C | G |
|       |    |    |                        |          |         | SOMGT:/0:16 0/1:3,2:37: C    | G |
|       |    |    |                        |          |         | SOMGT:/0:18 0/1:228,15: C    | T |
|       |    |    |                        |          | 0.1 0   | SOMGT:/0:9,(0/1:3,2:37: A    | C |
| 0.021 |    |    |                        |          | 0 0     | SOMGT:/0:39 0/1:98,6:32 T    | C |
|       |    |    |                        |          |         | SOMGT:/0:11 0/1:40,7:19 T    | G |
|       |    |    |                        | 3.5      |         | SOMGT:/0:38 0/1:137,5:3 G    | A |
|       |    |    |                        | 1.64     |         | SOMGT:/0:52 0/1:89,9:37 G    | A |
|       |    |    |                        | 1.75     |         | SOMGT:/0:22 0/1:37,21:3 G    | A |
|       |    |    |                        | 2.9      |         | SOMGT:/0:27 0/1:17,25:3 G    | C |
|       |    |    |                        |          |         | SOMGT:/0:12 0/1:21,19:3 T    | C |
|       |    |    | 0.0,0.12, 0.912 1,N    | 2.8      |         | SOMGT:/0:90 0/1:192,7:3 C    | T |
|       |    |    |                        |          |         | SOMGT:/0:11 0/1:8,15:33 G    | A |
|       | ## | 0  |                        |          |         | SOMGT:/0:53 0/1:65,56:3 G    | A |
|       |    |    |                        |          |         | SOMGT:/0:79 0/1:125,99 G     | A |
|       |    |    |                        |          |         | SOMGT:/0:21 0/1:28,7:35 C    | A |
|       |    |    |                        |          | 0 0.2   | DB;SOMGT:/0:35 0/1:65,4:37 A | G |
|       |    |    |                        |          |         | SOMGT:/0:13 0/1:14,15:3 A    | T |
|       |    |    |                        |          |         | SOMGT:/0:52 0/1:122,20 C     | T |
|       |    |    |                        |          |         | SOMGT:/0:8,(0/1:11,5:37 C    | T |
| 2E-04 | ## | 0  | 0.0,0.993 1.0,D 0.96   | 2.9 3.63 |         | SOMGT:/0:33 0/1:58,43:3 G    | T |
|       |    |    |                        |          | 0       | SOMGT:/0:13 0/1:13,6:32 T    | C |
|       |    |    |                        |          | 0.1 0.3 | SOMGT:/0:61 0/1:120,8:3 C    | G |
|       |    |    | 0.0 0.993 1.0,D 1.00   | 5.2 3.95 |         | SOMGT:/0:60 0/1:75,67:3 T    | A |
|       |    |    |                        | 3.7 2.31 | 0       | SOMGT:/0:11 0/1:31,4:37 T    | C |
|       |    |    |                        | 2.9      |         | SOMGT:/0:64 0/1:58,47:3 G    | A |
|       |    |    |                        | 5.7 1.53 |         | SOMGT:/0:53 0/1:61,42:3 T    | C |
|       | ## | ## | 0 0.2 0.002 0.003 0.68 | 4.3 2.22 |         | SOMGT:/0:63 0/1:84,77:3 G    | A |
|       |    |    |                        | 4.3 1.40 |         | SOMGT:/0:19 0/1:22,15:3 C    | T |
|       |    |    |                        | 1,A      | 5.99    | SOMGT:/0:59 0/1:80,70:3 G    | A |
|       |    |    |                        |          |         | SOMGT:/0:23 0/1:48,17:3 C    | G |
|       |    |    | 0.0 0.943 0.997 1.00   | 4.1 4.28 |         | SOMGT:/0:51 0/1:94,69:3 C    | T |
|       |    |    |                        |          | 0       | SOMGT:/0:15 0/1:62,6:37 G    | A |
|       |    |    |                        |          | 0       | SOMGT:/0:17 0/1:48,5:37 A    | G |
|       |    |    |                        |          |         | SOMGT:/0:37 0/1:59,41:3 G    | C |
|       |    |    | 0.0,0.997 1.0,D 1.00   | 3.9 3.50 |         | SOMGT:/0:40 0/1:56,37:3 C    | G |
|       |    |    |                        | 6 1.44   |         | SOMGT:/0:37 0/1:69,6:37 A    | G |
|       |    |    |                        | 1.48     |         | SOMGT:/0:24 0/1:39,24:3 A    | C |
|       |    |    |                        |          | 0 0     | SOMGT:/0:8,(0/1:8,3:33: T    | C |
|       |    |    |                        |          |         | SOMGT:/0:91 0/1:134,86 G     | T |
|       |    |    |                        |          |         | SOMGT:/0:16 0/1:34,31:3 C    | G |
|       |    |    |                        |          | 0.1 0.2 | SOMGT:/0:13 0/1:29,7:37 C    | A |
|       | ## | 0  | 0.0 0.413 0.943 0.98   | 3.8 4.06 |         | SOMGT:/0:10 0/1:152,12 G     | A |
|       |    |    |                        | 4.4 1.49 |         | SOMGT:/0:37 0/1:119,6:3 T    | A |

|         |    |     |  |                                   |     |                              |   |
|---------|----|-----|--|-----------------------------------|-----|------------------------------|---|
|         |    |     |  | 4.6 1.64 .                        |     | SOM GT:/0:84 0/1:110,66 G    | T |
|         |    |     |  | 0.9340.998 1,N 2.2 .              |     | SOM GT:/0:22 0/1:26,20:3 T   | C |
|         |    |     |  | 0.210.068 0.396 0.99 5.8 3.14 0 . |     | SOM GT:/0:17 0/1:32,9:12 G   | C |
|         |    |     |  |                                   |     | SOM GT:/0:75 0/1:104,63 G    | A |
|         |    |     |  |                                   | 0 . | SOM GT:/0:16 0/1:27,8:16 A   | C |
|         |    |     |  |                                   |     | SOM GT:/0:52 0/1:82,56:3 C   | T |
|         |    |     |  |                                   |     | SOM GT:/0:16 0/1:13,20:3 C   | T |
|         |    |     |  |                                   | 0   | SOM GT:/0:15 0/1:29,3:37 A   | G |
|         |    |     |  |                                   |     | SOM GT:/0:55 0/1:169,12 G    | T |
|         |    |     |  |                                   | 0   | 0 SOM GT:/0:66 0/1:175,8:3 C | A |
|         |    |     |  |                                   | 0   | 0 SOM GT:/0:70 0/1:123,5:3 A | G |
|         |    |     |  | 1.30 .                            |     | SOM GT:/0:46 0/1:87,50:3 C   | A |
|         |    |     |  | 3 .                               |     | SOM GT:/0:11 0/1:164,13: A   | G |
|         |    |     |  |                                   |     | SOM GT:/0:35 0/1:72,8:33 G   | A |
|         |    |     |  | 2.7 .                             |     | SOM GT:/0:68 0/1:75,67:3 C   | T |
|         |    |     |  |                                   |     | SOM GT:/0:44 0/1:62,62:3 C   | T |
|         |    |     |  |                                   |     | SOM GT:/0:12 0/1:15,15:3 C   | A |
|         |    |     |  |                                   | 0 . | SOM GT:/0:37 0/1:34,10:3 C   | T |
|         |    |     |  |                                   | 0   | 0 SOM GT:/0:10 0/1:31,3:37 T | C |
|         |    |     |  |                                   |     | SOM GT:/0:9,(0/1:10,4:21 C   | A |
|         |    |     |  |                                   | 0   | 0 SOM GT:/0:47 0/1:100,8:3 G | A |
|         |    |     |  |                                   |     | SOM GT:/0:44 0/1:101,6:3 C   | T |
|         | ## | 0 . |  | 5.4 2.61 .                        |     | SOM GT:/0:48 0/1:119,9:3 C   | T |
|         |    |     |  |                                   |     | SOM GT:/0:58 0/1:70,4:34 G   | A |
|         | 0  | 0 . |  |                                   | 0   | 0 SOM GT:/0:21 0/1:36,6:37 C | T |
|         |    |     |  | 3.2 .                             |     | SOM GT:/0:15 0/1:19,6:37 C   | G |
|         |    |     |  | 3.9 .                             |     | SOM GT:/0:12 0/1:167,12: G   | A |
|         |    |     |  | 0.0 0.0040.0010.99 2.8 .          |     | SOM GT:/0:67 0/1:110,76 C    | T |
|         |    |     |  |                                   | 0 . | SOM GT:/0:11 0/1:39,4:37 A   | G |
|         |    |     |  |                                   | 0 . | SOM GT:/0:20 0/1:43,5:37 T   | C |
|         |    |     |  |                                   |     | SOM GT:/0:12 0/1:20,16:3 C   | A |
| 2E-04 . |    |     |  |                                   |     | SOM GT:/0:17 0/1:27,3:37 C   | T |
|         |    |     |  |                                   |     | SOM GT:/0:32 0/1:56,42:3 C   | T |
|         |    |     |  |                                   | 0 . | SOM GT:/0:11 0/1:42,7:37 G   | T |
|         |    |     |  |                                   | 0 . | DB;GT:/0:51 0/1:245,10 G     | C |
|         |    |     |  |                                   | 0 . | DB;GT:/0:38 0/1:195,8:3 A    | T |
|         |    |     |  |                                   | 0 . | DB;GT:/0:37 0/1:100,6:3 T    | C |
|         |    |     |  |                                   |     | DB;GT:/0:36 0/1:106,5:3 A    | G |
|         |    |     |  |                                   | 0 . | DB;GT:/0:62 0/1:183,7:3 T    | C |
|         |    |     |  |                                   |     | DB;GT:/0:78 0/1:202,8:3 G    | T |
|         |    |     |  |                                   | 0 . | DB;GT:/0:49 0/1:121,6:3 C    | G |
|         |    |     |  |                                   | 0 . | DB;GT:/0:46 0/1:127,6:3 C    | T |
|         |    |     |  |                                   | 0 . | DB;GT:/0:35 0/1:86,8:33 T    | G |
|         |    |     |  |                                   | 0 . | SOM GT:/0:50 0/1:117,8:3 A   | G |
|         |    |     |  |                                   |     | DB;GT:/0:52 0/1:125,6:3 A    | C |
|         |    |     |  |                                   | 0 . | DB;GT:/0:36 0/1:149,7:3 T    | G |
|         |    |     |  |                                   | 0 . | SOM GT:/0:34 0/1:71,7:37 A   | G |
|         |    |     |  |                                   | 0 . | DB;GT:/0:55 0/1:180,7:3 C    | G |
|         |    |     |  |                                   |     | DB;GT:/0:80 0/1:275,14 C     | T |
|         |    |     |  |                                   |     | DB;GT:/0:70 0/1:207,7:3 G    | T |
|         |    |     |  |                                   |     | DB;GT:/0:66 0/1:161,11 A     | T |
|         |    |     |  |                                   |     | SOM GT:/0:18 0/1:43,3:37 G   | T |
|         |    |     |  |                                   |     | DB;GT:/0:19 0/1:41,4:37 C    | T |
|         |    |     |  |                                   |     | SOM GT:/0:17 0/1:40,3:37 G   | C |

|       |   |    |     |       |       |      |      |                           |     |                           |   |
|-------|---|----|-----|-------|-------|------|------|---------------------------|-----|---------------------------|---|
|       |   |    |     |       |       |      | 0.   | DB;GT:/0:44 0/1:147,10 T  | C   |                           |   |
|       |   |    |     |       |       |      |      | SOMGT:/0:11 0/1:45,3:37 G | A   |                           |   |
|       |   |    |     |       |       |      | 0.   | SOMGT:/0:14 0/1:42,4:37 C | G   |                           |   |
|       |   |    |     |       |       |      |      | SOMGT:/0:14 0/1:34,3:37 C | T   |                           |   |
|       |   |    |     |       |       |      |      | SOMGT:/0:28 0/1:39,25:3 C | G   |                           |   |
| 1E-03 | 0 | 0  | 0.0 | 0.086 | 0.044 | 1,D  | 5.2  | 0                         | 0   | SOMGT:/0:12 0/1:307,18 G  | C |
| 0.317 |   |    |     |       |       |      |      | 0                         | 0.1 | DB;GT:/0:39 0/1:83,4:37 T | C |
|       |   |    |     |       |       |      |      |                           |     | SOMGT:/0:15 0/1:10,11:3 G | T |
|       |   |    | 0.0 | 0.942 | 0.988 | 1,D  | 5.3  | 3.11                      |     | SOMGT:/0:15 0/1:81,200 C  | A |
|       |   | ## | 0.0 | 0.885 | 0.933 | 1,D  | 5.3  | 3.92                      |     | SOMGT:/0:15 0/1:58,203 C  | T |
|       |   |    |     |       |       |      |      | 0                         | 0   | SOMGT:/0:18 0/1:51,4:37 C | A |
|       |   |    |     |       |       |      |      | 0                         | 0.1 | SOMGT:/0:9,(0/1:23,4:37 C | A |
| 0.533 |   |    |     |       |       |      |      | 0                         | 0.2 | SOMGT:/0:9,(0/1:20,4:37 A | G |
|       |   |    | 0.7 | 0.047 | 0.042 | 1,N  |      |                           |     | SOMGT:/0:35 0/1:50,22:3 G | A |
|       |   |    |     |       |       |      |      | 0                         | 0   | SOMGT:/0:17 0/1:18,6:22 A | C |
|       |   |    |     |       |       |      |      |                           |     | SOMGT:/0:94 0/1:129,91 C  | T |
|       |   |    |     |       |       |      | 2.31 | 0                         | 0   | SOMGT:/0:36 0/1:50,39:3 G | A |
|       |   |    |     |       |       |      |      |                           |     | SOMGT:/0:11 0/1:13,16:3 C | T |
|       |   |    |     |       |       |      |      |                           |     | SOMGT:/0:16 0/1:29,16:3 C | T |
|       |   |    |     |       |       |      |      | 0.1                       | 0.1 | SOMGT:/0:16 0/1:29,7:37 T | A |
| 0.134 |   |    |     |       |       |      |      | 0.2                       | 0.2 | SOMGT:/0:10 0/1:31,14:3 A | G |
|       |   |    |     |       |       |      |      | 0.                        |     | SOMGT:/0:51 0/1:139,5:3 C | G |
|       |   |    |     |       |       |      |      | 0                         | 0   | SOMGT:/0:37 0/1:45,7:37 T | G |
|       |   |    |     |       |       |      |      | 0.                        |     | DB;GT:/0:37 0/1:55,5:37 A | G |
|       |   |    |     |       |       |      |      | 0.                        |     | SOMGT:/0:10 0/1:48,9:37 T | G |
|       |   |    |     |       |       |      |      |                           |     | SOMGT:/0:9,(0/1:41,3:37 C | T |
|       |   |    |     |       |       |      |      |                           |     | SOMGT:/0:45 0/1:64,5:34 G | C |
|       |   |    |     |       |       |      |      |                           |     | SOMGT:/0:45 0/1:82,4:34 C | T |
|       |   |    |     |       |       |      |      | 0.1                       | 0   | DB;GT:/0:38 0/1:117,8:3 T | C |
|       |   |    |     |       |       |      |      | 0                         | 0   | SOMGT:/0:9,(0/1:17,4:37 T | A |
|       |   |    |     |       |       |      |      | 0                         | 0   | SOMGT:/0:8,(0/1:16,3:37 T | A |
|       |   |    |     |       |       |      | 2.77 |                           |     | SOMGT:/0:59 0/1:70,63:3 C | G |
|       |   |    |     |       |       |      | 2.7  | 2.69                      |     | SOMGT:/0:28 0/1:61,4:37 G | A |
|       |   |    |     |       |       |      |      | 0                         | 0   | SOMGT:/0:96 0/1:186,6:3 G | T |
|       |   | ## | 0   |       |       |      |      | 0.                        |     | SOMGT:/0:96 0/1:107,11:G  | A |
|       |   |    | 0.6 | 0.098 | 0.066 | 1,D  | 5.1  | 2.42                      |     | SOMGT:/0:53 0/1:80,58:3 C | T |
|       |   |    |     |       |       |      |      | 0.                        |     | SOMGT:/0:8,(0/1:8,8:34: G | A |
| 0.053 |   |    |     |       |       |      |      |                           |     | DB;GT:/0:26 0/1:57,27:3 C | T |
|       |   |    |     |       |       |      |      | 0                         | 0   | SOMGT:/0:15 0/1:36,4:37 A | T |
|       |   |    |     |       |       |      |      | 0                         | 0   | SOMGT:/0:8,(0/1:6,5:37: G | C |
|       |   |    |     |       |       |      |      | 0                         | 0   | SOMGT:/0:11 0/1:25,3:37 G | A |
|       |   |    |     |       |       |      |      | 0                         | 0   | SOMGT:/0:10 0/1:25,3:37 C | T |
|       |   |    |     |       |       |      |      |                           |     | SOMGT:/0:42 0/1:85,16:3 C | A |
|       |   | ## | ##  | 0     |       |      |      |                           |     | SOMGT:/0:10 0/1:146,12:G  | A |
|       |   |    |     |       |       |      |      |                           |     | SOMGT:/0:54 0/1:66,38:3 G | A |
|       |   |    |     |       |       |      |      |                           |     | SOMGT:/0:56 0/1:65,38:3 G | T |
| 2E-04 |   |    | 0.1 | 0.806 | 0.985 | 0.64 | 5.1  | 2.59                      |     | SOMGT:/0:15 0/1:215,16:G  | A |
|       |   |    |     |       |       |      |      |                           |     | SOMGT:/0:56 0/1:99,61:3 T | C |
|       |   |    |     |       |       |      | 4.1  | 1.24                      |     | SOMGT:/0:56 0/1:70,51:3 C | T |
|       |   |    |     |       |       |      |      |                           |     | SOMGT:/0:51 0/1:73,44:3 G | A |
|       |   |    |     |       |       |      |      |                           |     | SOMGT:/0:11 0/1:15,3:37 G | C |
|       |   |    |     |       |       |      |      | 0.                        |     | SOMGT:/0:18 0/1:34,3:37 C | G |
|       |   |    |     |       |       |      |      |                           |     | SOMGT:/0:90 0/1:129,10:G  | C |
| 0.13  |   |    |     |       |       |      |      | 0.2                       | 0.2 | SOMGT:/0:9,(0/1:15,15:3 T | A |

|       |    |    |     |       |       |       |       |       |      |          |                   |                   |            |    |   |   |   |
|-------|----|----|-----|-------|-------|-------|-------|-------|------|----------|-------------------|-------------------|------------|----|---|---|---|
|       | ## | 0  | 0.0 | 0.773 | 0.928 | 1,N   | 2.55  |       | SOM  | GT:/0:85 | 0/1:136,11        | G                 | A          |    |   |   |   |
| 0.722 |    |    |     |       |       |       |       | 0.3   | 0.5  | DB;S     | GT:/0:48          | 0/1:124,8         | T          | C  |   |   |   |
|       |    |    |     |       |       |       |       |       |      | SOM      | GT:/0:8,(0/1:10,6 | 32                | G          | A  |   |   |   |
|       |    |    | 0.0 | 0.793 | 0.976 | 1.00  | 5.8   | 4.40  |      | SOM      | GT:/0:61          | 0/1:70,66         | T          | G  |   |   |   |
|       |    |    |     |       |       |       |       |       |      | SOM      | GT:/0:46          | 0/1:60,48         | T          | G  | A |   |   |
|       | ## | 0  |     |       |       |       |       |       |      | SOM      | GT:/0:58          | 0/1:88,43         | T          | G  | A |   |   |
|       | ## | ## | 0   |       |       |       |       |       |      | SOM      | GT:/0:45          | 0/1:75,52         | T          | G  | A |   |   |
|       |    |    |     |       |       |       |       |       | 0    | SOM      | GT:/0:12          | 0/1:31,5          | 34         | C  | T |   |   |
|       |    |    |     |       |       |       | 3.1   | 1.79  |      | SOM      | GT:/0:25          | 0/1:35,21         | T          | C  | A |   |   |
|       |    |    |     |       |       |       |       |       |      | SOM      | GT:/0:32          | 0/1:43,29         | T          | C  | A |   |   |
|       |    |    | 0.2 | 0.974 | 0.998 | 0.99  | 3.9   | 1.92  |      | SOM      | GT:/0:55          | 0/1:93,63         | T          | C  | A |   |   |
|       |    |    |     |       |       |       |       |       | 0    | 0.2      | SOM               | GT:/0:8,(0/1:15,5 | 37         | C  | G |   |   |
|       |    |    |     |       |       |       |       |       | 0    | 0.1      | SOM               | GT:/0:8,(0/1:2,4  | 37         | T  | G | A |   |
|       |    |    |     |       |       |       |       |       | 0.1  | 0        | SOM               | GT:/0:48          | 0/1:91,4   | 37 | G | A |   |
|       |    |    |     |       |       |       |       |       | 0    | 0.1      | SOM               | GT:/0:21          | 0/1:48,10  | T  | C |   |   |
|       |    |    |     |       |       |       |       |       | 0    | 0        | SOM               | GT:/0:27          | 0/1:76,4   | 37 | G | T |   |
|       |    |    |     |       |       |       |       |       | 0    | 0        | DB;S              | GT:/0:32          | 0/1:57,6   | 37 | G | A |   |
|       |    |    |     |       |       |       |       |       | 0    | 0        | SOM               | GT:/0:8,(0/1:10,3 | 3          | T  | A | A |   |
|       |    |    |     |       |       |       |       |       |      |          | SOM               | GT:/0:9,(0/1:4,6  | 30         | A  | C |   |   |
|       |    |    |     |       |       |       |       |       |      |          | SOM               | GT:/0:11          | 0/1:13,3   | 37 | T | G |   |
|       |    |    |     |       |       |       | 4.5   |       |      |          | SOM               | GT:/0:70          | 0/1:99,93  | T  | G | A |   |
|       |    |    |     |       |       |       | 2.9   | 2.16  |      |          | SOM               | GT:/0:34          | 0/1:70,52  | T  | G | A |   |
|       |    |    |     |       |       |       |       |       |      |          | SOM               | GT:/0:14          | 0/1:6,2    | 37 | T | C |   |
|       |    |    | 0.0 | 0.012 | 0.313 | 0.99  | 2     | 2.54  |      |          | SOM               | GT:/0:18          | 0/1:4,14   | 3  | T | A |   |
|       |    |    |     |       |       |       |       |       | 0    | 0.1      | SOM               | GT:/0:10          | 0/1:1,4    | 34 | T | C |   |
| 0.078 |    |    |     |       |       |       |       |       |      |          | SOM               | GT:/0:22          | 0/1:5,6    | 37 | T | G |   |
| 0.029 |    | 0  | 0   |       |       |       |       |       | 0    | 0        | SOM               | GT:/0:55          | 0/1:80,4   | 37 | T | C |   |
|       |    |    |     |       |       |       |       |       |      |          | SOM               | GT:/0:31          | 0/1:20,4   | 27 | G | A |   |
|       |    | 0  | 0   | 0     | 0.5   | 0.0,B | 0.002 | 1,D   |      | 0        | DB;S              | GT:/0:34          | 0/1:46,5   | 37 | T | C |   |
|       |    |    |     |       |       |       |       |       |      |          | SOM               | GT:/0:18          | 0/1:47,21  | T  | C | A |   |
|       |    |    |     |       |       |       | 0.926 | 0.986 | 0.99 | 3.6      | 2.28              |                   |            |    |   |   | A |
|       |    |    |     |       |       |       |       |       |      |          | SOM               | GT:/0:11          | 0/1:131,10 | G  | A |   |   |
|       |    |    |     |       |       |       |       |       |      |          | SOM               | GT:/0:8,(0/1:5,2  | 37         | T  | A | A |   |
| 5E-04 |    | ## | 0   |       |       |       |       |       |      |          | SOM               | GT:/0:12          | 0/1:191,15 | G  | A |   |   |
|       |    |    |     |       |       |       |       |       |      |          | SOM               | GT:/0:21          | 0/1:36,10  | T  | C | G |   |
|       |    |    |     |       |       |       |       |       |      |          | SOM               | GT:/0:23          | 0/1:47,10  | T  | C | G |   |
|       |    |    |     |       |       |       |       |       |      |          | SOM               | GT:/0:12          | 0/1:30,3   | 37 | T | G |   |
|       |    |    |     |       |       |       |       |       |      |          | SOM               | GT:/0:9,(0/1:5,2  | 37         | T  | A | C |   |
|       |    |    |     |       |       |       |       |       |      |          | SOM               | GT:/0:15          | 0/1:44,5   | 34 | T | C |   |
|       |    |    |     |       |       |       |       |       |      |          | SOM               | GT:/0:21          | 0/1:47,5   | 37 | T | C |   |
|       |    |    |     |       |       |       | 1,A   | 4.3   | 12.6 |          | SOM               | GT:/0:58          | 0/1:68,54  | T  | C | A |   |
|       |    |    |     |       |       |       |       | 1.66  |      |          | SOM               | GT:/0:47          | 0/1:130,5  | T  | C | A |   |
|       |    |    |     |       |       |       |       |       |      |          | SOM               | GT:/0:11          | 0/1:13,4   | 34 | T | A | G |
|       |    |    |     |       |       |       |       |       |      |          | SOM               | GT:/0:52          | 0/1:131,17 | A  | G |   |   |
|       |    |    |     |       |       |       |       | 1.46  |      |          | SOM               | GT:/0:39          | 0/1:66,52  | T  | C | A |   |
|       |    |    |     |       |       |       |       |       |      |          | SOM               | GT:/0:49          | 0/1:69,60  | T  | C | A |   |
|       |    |    |     |       |       |       |       |       |      |          | SOM               | GT:/0:36          | 0/1:81,15  | 1T | G |   |   |
|       |    |    |     |       |       |       |       |       | 0    | 0        | SOM               | GT:/0:13          | 0/1:9,4    | 37 | T | C | A |
|       |    |    |     |       |       |       |       |       | 0    |          | SOM               | GT:/0:29          | 0/1:70,5   | 37 | T | A | G |
|       |    |    |     |       |       |       |       |       |      |          | SOM               | GT:/0:41          | 0/1:79,60  | T  | C | A |   |
|       |    |    |     |       |       |       |       |       |      |          | SOM               | GT:/0:11          | 0/1:19,3   | 37 | T | A | G |
|       |    |    |     |       |       |       |       |       |      |          | SOM               | GT:/0:56          | 0/1:406,14 | C  | T |   |   |
|       |    |    |     |       |       |       |       |       |      |          | SOM               | GT:/0:30          | 0/1:290,27 | C  | T |   |   |
|       |    |    |     |       |       |       |       |       | 0    | 0        | SOM               | GT:/0:8,(0/1:11,3 | 37         | T  | A | G |   |
|       |    |    |     |       |       |       |       |       |      |          | SOM               | GT:/0:33          | 0/1:61,4   | 34 | T | A | G |

|       |   |    |     |           |       |       |      |      |      |     |          |             |             |   |   |   |
|-------|---|----|-----|-----------|-------|-------|------|------|------|-----|----------|-------------|-------------|---|---|---|
|       |   |    | 0.0 | 0.99      | 1.0,D | 1,D   | 4.6  | 5.20 |      | SOM | GT:/0:90 | 0/1:190,12  | C           | T |   |   |
|       |   | ## | 0   |           |       |       |      |      |      | SOM | GT:/0:41 | 0/1:95,5:37 | C           | T |   |   |
| 0.001 |   |    |     |           |       |       |      |      | 0    | SOM | GT:/0:62 | 0/1:117,5:3 | T           | C |   |   |
|       |   |    |     |           |       |       |      |      | 0.1  | 0.1 | SOM      | GT:/0:47    | 0/1:100,11  | T | C |   |
|       |   |    |     |           |       |       |      |      | 0    | 0   | DB;S     | GT:/0:43    | 0/1:100,6:3 | T | C |   |
|       |   |    |     |           |       |       |      |      | 0.1  | 0.2 | DB;S     | GT:/0:19    | 0/1:34,5:37 | T | G |   |
| 0.192 |   |    |     |           |       |       |      |      | 0.1  | 0.2 | DB;S     | GT:/0:19    | 0/1:37,6:37 | G | C |   |
|       |   |    |     |           |       |       |      |      | 0.3  | 0.3 | DB;S     | GT:/0:63    | 0/1:108,5:3 | T | C |   |
| 4E-04 |   | ## | 0   | 0.2       | 0.37  | 0.96  | 1.00 | 5.8  | 3.60 | 0   | SOM      | GT:/0:12    | 0/1:164,12  | C | T |   |
|       |   |    |     |           |       |       |      |      |      |     | SOM      | GT:/0:49    | 0/1:92,7:3  | 3 | G | A |
|       |   |    |     |           |       |       |      | 1.42 |      |     | SOM      | GT:/0:38    | 0/1:97,11:3 | 3 | G | T |
|       |   |    |     |           |       |       |      | 2.7  |      | 0   | SOM      | GT:/0:19    | 0/1:16,9:14 | T | G |   |
|       |   |    | 0.0 | 0.82      | 0.99  | 2     | 1,N  | 4.5  | 1.58 |     | SOM      | GT:/0:40    | 0/1:65,7:37 | G | T |   |
|       |   |    |     |           |       |       |      |      |      |     | SOM      | GT:/0:66    | 0/1:114,8:3 | C | T |   |
|       |   |    | 0.0 | 0.99      | 1.0,D | 1,D   |      | 2.95 |      |     | SOM      | GT:/0:66    | 0/1:119,9:3 | G | A |   |
|       |   |    |     |           |       |       |      |      | 0    |     | SOM      | GT:/0:15    | 0/1:18,4:37 | T | C |   |
|       |   |    |     |           |       |       |      |      | 0    |     | SOM      | GT:/0:8,    | 0/1:9,3:37  | G | A |   |
|       |   |    |     |           |       |       |      |      | 0    | 0.3 | SOM      | GT:/0:14    | 0/1:17,3:37 | C | G |   |
|       |   |    |     |           |       |       |      |      | 0    | 0   | SOM      | GT:/0:70    | 0/1:112,6:3 | 3 | G | A |
|       |   |    |     |           |       |       |      |      |      |     | SOM      | GT:/0:30    | 0/1:45,5:37 | C | G |   |
|       |   |    |     |           |       |       |      |      | 0.1  | 0   | DB;S     | GT:/0:20    | 0/1:18,3:37 | G | C |   |
| 0.114 |   |    |     |           |       |       |      |      | 0    | 0   | SOM      | GT:/0:8,    | 0/1:11,6:37 | A | G |   |
|       |   |    |     |           |       |       |      |      |      |     | SOM      | GT:/0:27    | 0/1:45,4:37 | C | G |   |
|       |   |    |     |           |       |       |      |      | 0    | 0   | DB;S     | GT:/0:34    | 0/1:66,4:37 | T | A |   |
|       |   | ## | 0   |           |       |       |      |      |      |     | SOM      | GT:/0:60    | 0/1:99,14:3 | 3 | G | A |
|       |   |    | 0.0 | 0.92      | 0.99  | 0.92  | 2.1  | 2.54 |      |     | SOM      | GT:/0:56    | 0/1:93,5:2  | 9 | G | T |
|       |   |    |     |           |       |       |      |      |      |     | SOM      | GT:/0:20    | 0/1:46,3:3  | 3 | G | C |
|       |   | ## | 0   | 0.0       | 1.0,D | 1.0,D | 1,D  | 5    | 5.82 |     | SOM      | GT:/0:81    | 0/1:144,11  | G | A |   |
| 0.128 | 0 | 0  | 0   | 1.0,0.0,B | 0.0,B | 1.00  | 3.3  |      | 0    | 0.1 | SOM      | GT:/0:24    | 0/1:37,4:37 | A | G |   |
|       |   | ## | ##  | 0.0       | 0.01, | 0.047 | 1,N  | 1.51 |      |     | SOM      | GT:/0:27    | 0/1:71,11:3 | C | T |   |
|       |   | 0  | 0   |           |       |       |      |      | 0    | 0   | SOM      | GT:/0:40    | 0/1:99,11:3 | A | G |   |
|       |   |    |     | 1.0,0.001 | 0.0,B | 1,D   | 5.4  |      |      |     | SOM      | GT:/0:34    | 0/1:60,7:37 | C | A |   |
|       |   |    |     |           |       |       |      | 1.35 |      |     | SOM      | GT:/0:54    | 0/1:92,9:37 | T | A |   |
|       |   |    |     |           |       |       |      |      |      |     | SOM      | GT:/0:11    | 0/1:188,18  | G | A |   |
|       |   |    |     |           |       |       | 3.2  | 1.43 | 0    | 0   | SOM      | GT:/0:11    | 0/1:19,4:37 | G | A |   |
|       |   |    |     |           |       |       |      |      |      |     | SOM      | GT:/0:51    | 0/1:39,4:37 | G | C |   |
|       |   |    |     |           |       |       |      |      |      |     | SOM      | GT:/0:16    | 0/1:15,4:27 | T | C |   |
|       |   |    |     |           |       |       |      |      | 0    | 0   | SOM      | GT:/0:12    | 0/1:15,3:37 | G | T |   |
|       |   |    | 0.0 | 0.707     | 0.76  | 3     | 1.00 | 4.2  | 2.72 |     | SOM      | GT:/0:13    | 0/1:189,12  | C | T |   |
|       |   |    |     |           |       |       |      | 3.3  |      |     | SOM      | GT:/0:41    | 0/1:82,6:37 | C | T |   |
|       |   |    |     |           |       |       |      |      |      |     | SOM      | GT:/0:9,    | 0/1:5,2:37  | C | A |   |
|       |   |    |     |           |       |       |      |      | 0    |     | SOM      | GT:/0:10    | 0/1:7,3:37  | G | C |   |
|       |   |    |     |           |       |       |      |      | 0    |     | SOM      | GT:/0:10    | 0/1:7,3:33  | C | T |   |
| 0.002 | 0 | 0  |     |           |       |       |      |      | 0    | 0   | DB;S     | GT:/0:55    | 0/1:98,7:37 | G | A |   |
|       |   |    |     |           |       |       |      | 1.95 | 0    | 0   | SOM      | GT:/0:16    | 0/1:18,3:37 | G | A |   |
| 0.105 |   |    |     |           |       |       |      |      |      |     | SOM      | GT:/0:14    | 0/1:20,4:27 | C | T |   |
|       |   |    |     |           |       |       |      |      |      |     | SOM      | GT:/0:96    | 0/1:141,13  | G | A |   |
|       |   |    |     |           |       |       |      | 1.31 |      |     | SOM      | GT:/0:22    | 0/1:47,10:1 | A | C |   |
|       |   |    |     |           |       |       |      |      |      |     | SOM      | GT:/0:27    | 0/1:25,14:1 | A | C |   |
|       |   |    |     |           |       |       |      |      |      |     | SOM      | GT:/0:38    | 0/1:71,8:37 | T | G |   |
|       |   |    | 0.1 | 0.655     | 0.93  | 6     | 1,D  | 5.6  | 5.16 |     | SOM      | GT:/0:42    | 0/1:66,7:37 | G | A |   |
|       |   | ## | 0   | 0.0       | 0.90  | 0.99  | 1,D  | 5.8  | 5.70 |     | DB;S     | GT:/0:26    | 0/1:38,6:37 | G | A |   |
|       |   |    |     |           |       |       |      | 1.41 |      |     | SOM      | GT:/0:52    | 0/1:79,6:3  | 3 | C | A |
|       |   | 0  | 0   | 0.1       | 0.565 | 0.98  | 1.09 | 4.2  | 3.28 |     | SOM      | GT:/0:20    | 0/1:339,26  | G | A |   |

|       |  |    |     |       |       |       |      |       |       |                                 |   |
|-------|--|----|-----|-------|-------|-------|------|-------|-------|---------------------------------|---|
|       |  |    |     |       |       |       |      |       |       | SOM GT:/0:10 0/1:163,14 A       | G |
|       |  |    |     |       |       |       |      |       | 0.    | SOM GT:/0:51 0/1:85,7:35 A      | G |
|       |  |    |     |       |       |       |      |       | 0.    | SOM GT:/0:8,(0/1:4,3:37: C      | T |
|       |  |    | 0.2 | 0.002 | 0.002 | 1,N   | 2.2  | 1.28. |       | SOM GT:/0:69 0/1:119,5:3 C      | T |
|       |  |    |     |       |       |       |      |       |       | SOM GT:/0:26 0/1:49,7:37 A      | C |
|       |  |    |     |       |       |       |      |       | 0.1   | 0.2 SOM GT:/0:13 0/1:27,3:37 G  | A |
|       |  |    |     |       |       |       |      |       | 0     | 0 SOM GT:/0:42 0/1:54,5:37 C    | T |
|       |  | ## | 0   | 0.2   | 0.085 | 0.804 | 1,D  | 2.4   | 1.31. | SOM GT:/0:17 0/1:280,26 G       | A |
| 0.381 |  |    |     |       |       |       |      |       | 0.1   | 0.2 DB;S GT:/0:19 0/1:17,3:35 C | T |
|       |  |    |     |       |       |       |      |       |       | SOM GT:/0:17 0/1:25,3:37 G      | A |
|       |  |    |     |       |       |       |      |       |       | SOM GT:/0:15 0/1:21,8:14 A      | C |
|       |  |    | 0.0 | 0.999 | 1.0,D | 0.91  | 3.2  |       |       | SOM GT:/0:19 0/1:89,9:35 G      | C |
|       |  |    | 0.0 | 0.91, | 0.99, | 0.86  | 3.5  | 3.17. |       | SOM GT:/0:75 0/1:104,13 C       | A |
|       |  | ## | 0   | 0.0   | 0.469 | 0.99, | 0.99 | 3.7   | 2.54. | SOM GT:/0:77 0/1:160,11 C       | T |
|       |  |    |     |       |       |       |      |       |       | SOM GT:/0:30 0/1:57,4:37 G      | A |
|       |  |    |     |       |       |       |      |       | 0     | SOM GT:/0:53 0/1:82,9:32 T      | A |
|       |  |    |     |       |       |       |      |       |       | SOM GT:/0:59 0/1:88,6:37 T      | G |
|       |  |    |     |       |       |       |      |       |       | SOM GT:/0:27 0/1:46,3:37 C      | T |
|       |  |    |     |       |       |       |      |       |       | SOM GT:/0:36 0/1:63,5:37 C      | T |
|       |  |    | 0.0 | 0.997 | 1.0,D | 1,D   | 5.6  | 5.94. |       | SOM GT:/0:79 0/1:141,10 G       | A |
|       |  |    |     |       |       |       |      |       | 0.    | SOM GT:/0:46 0/1:90,13:1 T      | G |
|       |  |    |     |       |       |       |      |       | 0.    | SOM GT:/0:73 0/1:128,5:3 C      | T |
| 0.069 |  |    |     |       |       |       |      |       | 0.2   | 0.2 SOM GT:/0:9,(0/1:8,11:37 G  | A |
|       |  |    |     |       |       |       |      |       |       | SOM GT:/0:52 0/1:30,6:28 C      | T |
|       |  |    |     |       |       |       |      |       |       | SOM GT:/0:31 0/1:22,4:37 G      | T |
|       |  |    |     |       |       |       |      |       |       | SOM GT:/0:12 0/1:4,2:37: A      | G |
|       |  |    |     |       |       |       |      |       | 0     | 0 SOM GT:/0:9,(0/1:8,3:28: C    | G |
|       |  |    |     |       |       |       |      |       |       | SOM GT:/0:21 0/1:10,6:37 C      | A |
|       |  |    |     |       |       |       |      |       | 0     | 0 SOM GT:/0:23 0/1:15,3:37 T    | C |
|       |  |    |     |       |       |       |      |       | 0     | SOM GT:/0:70 0/1:94,6:35 C      | T |
|       |  |    |     |       |       |       |      |       | 0     | SOM GT:/0:85 0/1:113,6:3 C      | T |
|       |  |    |     |       |       |       |      |       | 0     | 0 SOM GT:/0:11 0/1:15,3:28 G    | A |
|       |  |    | 0.0 | 0.041 | 0.006 | 1,D   | 6.1  | 4.63. |       | SOM GT:/0:37 0/1:61,6:37 G      | A |
|       |  |    | 0.0 | 0.681 | 0.989 | 0.99  | 3.7  |       |       | SOM GT:/0:52 0/1:83,16:3 C      | T |
|       |  |    | 0.0 | 1.0,D | 1.0,D | 1,D   | 5.3  | 5.07. |       | SOM GT:/0:40 0/1:87,4:37 C      | T |
| 0.008 |  |    |     |       |       |       |      |       |       | SOM GT:/0:39 0/1:73,4:34 G      | A |
| 0.005 |  |    |     |       |       |       |      |       | 0.    | SOM GT:/0:32 0/1:68,6:37 C      | T |
|       |  |    |     |       |       |       |      | 1.34. |       | SOM GT:/0:10 0/1:16,5:19 A      | C |
|       |  |    |     |       |       |       |      |       |       | SOM GT:/0:28 0/1:54,4:37 G      | C |
|       |  |    |     |       |       |       |      |       |       | SOM GT:/0:8,(0/1:5,3:33: C      | T |
|       |  |    |     |       |       |       |      |       |       | SOM GT:/0:53 0/1:66,5:37 G      | C |
|       |  |    |     |       |       |       |      |       | 0.    | SOM GT:/0:19 0/1:27,3:37 G      | A |
| 0.148 |  |    |     |       |       |       |      |       |       | SOM GT:/0:90 0/1:91,4:37 T      | A |
|       |  |    |     |       |       |       |      |       |       | SOM GT:/0:10 0/1:15,3:37 C      | G |
|       |  |    |     |       |       |       | 3.2  | 2.52. |       | SOM GT:/0:19 0/1:45,3:35 C      | T |
|       |  |    |     |       |       |       |      |       | 0.    | SOM GT:/0:22 0/1:32,5:37 G      | A |
| 0.039 |  |    |     |       |       |       |      |       | 0     | 0 SOM GT:/0:12 0/1:11,3:35 T    | C |
|       |  |    |     |       |       |       |      |       |       | SOM GT:/0:46 0/1:75,5:37 G      | A |
| 6E-04 |  |    |     |       |       |       |      |       | 0.    | SOM GT:/0:37 0/1:73,5:37 C      | T |
|       |  |    |     |       |       |       |      |       |       | SOM GT:/0:37 0/1:50,10:3 G      | A |
|       |  |    |     |       |       |       |      |       |       | SOM GT:/0:94 0/1:158,7:3 C      | T |
|       |  |    |     |       |       |       |      |       |       | SOM GT:/0:15 0/1:11,5:37 G      | A |
|       |  | 0  | 0.  |       |       |       |      |       | 0.1   | 0 DB;S GT:/0:47 0/1:72,7:37 C   | T |
|       |  | 0  | 0.  |       |       |       |      |       | 0.    | SOM GT:/0:47 0/1:72,5:37 T      | C |

|       |    |    |     |       |         |           |      |      |      |     |      |          |              |   |   |
|-------|----|----|-----|-------|---------|-----------|------|------|------|-----|------|----------|--------------|---|---|
| 0.371 | 0  | 0  | 0   | .     | .       | .         | .    | .    | 0    | 0.1 | SOM  | GT:/0:23 | 0/1:27,3:37  | G | C |
| .     | .  | .  | .   | .     | .       | .         | .    | .    | .    | .   | SOM  | GT:/0:69 | 0/1:94,8:35  | G | A |
| .     | .  | .  | .   | .     | .       | .         | .    | .    | .    | .   | SOM  | GT:/0:17 | 0/1:20,3:35  | G | T |
| .     | .  | .  | .   | .     | .       | .         | .    | .    | 0    | 0   | DB;S | GT:/0:33 | 0/1:57,4:37  | T | C |
| .     | ## | 0  | .   | .     | .       | .         | .    | .    | .    | .   | SOM  | GT:/0:12 | 0/1:233,19   | G | A |
| .     | .  | .  | 0.0 | 0.99  | 1.0,D   | 1,D       | 5.7  | 4.61 | .    | .   | SOM  | GT:/0:78 | 0/1:119,7:3  | G | A |
| .     | .  | .  | .   | .     | .       | .         | .    | .    | .    | .   | SOM  | GT:/0:21 | 0/1:14,3:37  | G | A |
| .     | ## | 0  | .   | .     | .       | .         | .    | .    | .    | .   | SOM  | GT:/0:62 | 0/1:122,12   | G | A |
| .     | .  | .  | .   | .     | .       | .         | .    | .    | 0    | .   | DB;S | GT:/0:22 | 0/1:36,5:37  | A | G |
| .     | .  | .  | .   | .     | .       | .         | .    | .    | 0.3  | 0.2 | SOM  | GT:/0:10 | 0/1:24,4:37  | G | A |
| .     | .  | .  | .   | .     | .       | .         | .    | 2.9  | .    | .   | SOM  | GT:/0:27 | 0/1:36,8:37  | G | A |
| .     | 0  | ## | 0   | 0.0   | 0.97    | 0.99      | 1,D  | 5.8  | 5.60 | .   | SOM  | GT:/0:58 | 0/1:158,6:3  | G | A |
| .     | .  | .  | .   | .     | .       | .         | .    | .    | .    | .   | SOM  | GT:/0:22 | 0/1:30,4:37  | A | G |
| 0.433 | .  | 1  | 1   | .     | .       | .         | .    | .    | 0.1  | 0.5 | SOM  | GT:/0:48 | 0/1:90,5:37  | C | G |
| .     | .  | .  | .   | .     | .       | .         | .    | .    | .    | .   | SOM  | GT:/0:19 | 0/1:31,4:37  | G | A |
| .     | .  | .  | .   | .     | .       | .         | .    | .    | .    | .   | SOM  | GT:/0:18 | 0/1:35,9:15  | C | G |
| 4E-04 | .  | .  | .   | .     | .       | .         | .    | .    | .    | .   | SOM  | GT:/0:12 | 0/1:21,7:37  | C | T |
| .     | .  | .  | 0.3 | 0.01  | 0.04    | 1,D       | 5.2  | 2.12 | .    | .   | SOM  | GT:/0:10 | 0/1:198,14   | C | A |
| .     | .  | .  | .   | .     | .       | .         | .    | 1.70 | .    | .   | SOM  | GT:/0:39 | 0/1:85,6:37  | G | T |
| .     | .  | .  | .   | .     | .       | .         | .    | .    | .    | .   | SOM  | GT:/0:12 | 0/1:30,4:37  | C | T |
| .     | .  | .  | .   | .     | .       | .         | .    | .    | .    | .   | SOM  | GT:/0:9, | 0/1:7,5:32   | A | T |
| .     | 0  | 0  | .   | .     | .       | .         | .    | 2.1  | .    | .   | SOM  | GT:/0:12 | 0/1:14,3:37  | T | C |
| .     | .  | .  | .   | .     | .       | .         | .    | .    | .    | .   | SOM  | GT:/0:11 | 0/1:198,16   | C | A |
| .     | .  | .  | .   | .     | .       | .         | .    | .    | .    | .   | SOM  | GT:/0:93 | 0/1:181,20   | G | C |
| .     | .  | .  | .   | .     | .       | .         | .    | 2.9  | .    | .   | SOM  | GT:/0:31 | 0/1:32,4:37  | G | C |
| .     | .  | .  | .   | .     | .       | .         | .    | .    | 0    | .   | SOM  | GT:/0:16 | 0/1:41,8:35  | C | A |
| .     | ## | 0  | 0.0 | 0.36  | 1.0,517 | 1,D       | 5.7  | 4.40 | 0    | .   | DB;S | GT:/0:17 | 0/1:46,4:37  | C | T |
| .     | ## | ## | 0   | 0.4   | 0.052   | 0.375     | 0.51 | 4    | 2.41 | .   | SOM  | GT:/0:49 | 0/1:70,7:37  | C | T |
| .     | 0  | 0  | .   | .     | .       | .         | .    | .    | .    | .   | DB;S | GT:/0:11 | 0/1:243,8:3  | T | C |
| 0.001 | .  | 0  | 0   | 0.1   | 0.03,   | 1.0,0.075 | 1.00 | 1.87 | .    | .   | SOM  | GT:/0:45 | 0/1:58,8:37  | C | T |
| .     | .  | .  | .   | .     | .       | 1,A       | 3.73 | .    | .    | .   | SOM  | GT:/0:51 | 0/1:70,12:3  | G | A |
| 0.001 | .  | .  | .   | .     | .       | .         | .    | .    | 0    | 0   | SOM  | GT:/0:37 | 0/1:68,5:37  | G | A |
| .     | .  | .  | .   | .     | .       | .         | .    | 2.6  | .    | .   | SOM  | GT:/0:15 | 0/1:36,4:37  | C | A |
| .     | .  | .  | .   | .     | .       | .         | .    | .    | .    | .   | SOM  | GT:/0:52 | 0/1:89,11:3  | G | A |
| 0.22  | .  | .  | .   | .     | .       | .         | .    | .    | 0.1  | 0.3 | SOM  | GT:/0:8, | 0/1:6,9:37   | T | C |
| .     | ## | 0  | 0.0 | 1.0,D | 1.0,D   | 1,D       | 5    | 4.51 | .    | .   | SOM  | GT:/0:84 | 0/1:155,9:3  | G | A |
| .     | .  | .  | .   | .     | .       | .         | .    | .    | .    | .   | SOM  | GT:/0:9, | 0/1:25,4:37  | C | T |
| .     | .  | .  | .   | .     | .       | .         | .    | .    | .    | .   | SOM  | GT:/0:31 | 0/1:72,10:1A | A | C |
| .     | ## | 0  | .   | .     | 1,A     | 4.9       | 5.89 | .    | .    | .   | SOM  | GT:/0:17 | 0/1:45,3:37  | G | A |
| .     | .  | .  | 0.0 | 0.997 | 1.0,D   | 1,D       | 6.2  | 4.86 | .    | .   | SOM  | GT:/0:31 | 0/1:79,4:37  | C | T |
| .     | .  | .  | .   | .     | .       | .         | .    | .    | .    | .   | SOM  | GT:/0:83 | 0/1:149,14   | C | T |
| .     | .  | .  | .   | .     | .       | .         | .    | .    | 0    | .   | SOM  | GT:/0:33 | 0/1:44,5:37  | T | G |
| .     | .  | .  | .   | .     | .       | .         | .    | .    | 0    | 0   | SOM  | GT:/0:9, | 0/1:12,3:37  | G | A |
| .     | .  | .  | .   | .     | .       | .         | .    | .    | 0    | .   | SOM  | GT:/0:9, | 0/1:9,3:37   | C | T |
| .     | .  | .  | .   | .     | .       | .         | .    | .    | 0    | 0   | SOM  | GT:/0:8, | 0/1:4,3:37   | T | G |
| .     | .  | .  | .   | .     | .       | .         | .    | .    | .    | .   | SOM  | GT:/0:10 | 0/1:20,3:37  | T | C |
| .     | .  | .  | .   | .     | .       | .         | .    | .    | 0    | 0   | SOM  | GT:/0:10 | 0/1:198,7:3  | C | T |
| .     | .  | .  | .   | .     | .       | .         | 3.49 | .    | .    | .   | SOM  | GT:/0:43 | 0/1:69,8:34  | G | T |
| .     | ## | 0  | .   | .     | .       | .         | .    | .    | .    | .   | SOM  | GT:/0:10 | 0/1:210,12   | G | A |
| .     | .  | .  | .   | .     | .       | .         | .    | .    | 0    | .   | SOM  | GT:/0:23 | 0/1:30,3:37  | T | A |
| .     | .  | .  | .   | .     | .       | .         | .    | .    | 0    | 0.3 | DB;S | GT:/0:44 | 0/1:67,4:34  | G | A |
| 2E-04 | .  | .  | .   | .     | .       | .         | .    | .    | 0    | 0   | SOM  | GT:/0:8, | 0/1:17,3:37  | C | T |
| .     | .  | .  | .   | .     | .       | .         | .    | .    | 0.2  | 0.2 | DB;S | GT:/0:22 | 0/1:51,8:37  | G | C |
| .     | .  | .  | .   | .     | .       | .         | .    | .    | .    | .   | SOM  | GT:/0:8, | 0/1:5,2:37   | G | T |



|       |    |     |                      |          |       |                          |   |   |
|-------|----|-----|----------------------|----------|-------|--------------------------|---|---|
|       |    |     |                      |          | 0 0.1 | SOM GT:/0:10 0/1:7,8:35  | A | C |
|       |    |     |                      |          | 0 0   | SOM GT:/0:10 0/1:15,6:37 | C | G |
|       |    |     |                      |          | 0 0.1 | SOM GT:/0:9,(0/1:18,3:33 | A | G |
|       |    |     |                      |          | 0 0.2 | SOM GT:/0:8,(0/1:18,4:37 | G | A |
|       |    | 0 0 |                      |          | 0 0   | SOM GT:/0:74 0/1:153,8:3 | G | A |
|       |    |     |                      | 2.8 2.38 |       | SOM GT:/0:22 0/1:312,17  | G | A |
| 2E-04 | ## | 0   |                      |          |       | SOM GT:/0:68 0/1:145,10  | C | T |
|       |    |     |                      |          |       | SOM GT:/0:20 0/1:27,3:37 | C | T |
|       |    | 0 0 | 1.0,0.0,B 0.0,B 1.00 |          | 0 0   | SOM GT:/0:42 0/1:72,4:37 | A | G |
|       |    |     |                      |          |       | SOM GT:/0:9,(0/1:1,2:37  | G | A |
|       |    |     | 0.5,0.0010.0,B 1,N   |          |       | SOM GT:/0:99 0/1:163,14  | T | C |
|       |    |     |                      |          |       | SOM GT:/0:18 0/1:304,14  | A | T |
|       |    |     |                      |          |       | SOM GT:/0:38 0/1:71,4:37 | C | T |
|       |    |     |                      |          |       | SOM GT:/0:15 0/1:20,3:33 | G | A |
|       |    |     |                      |          | 0     | DB;GT:/0:23 0/1:75,11:3  | C | G |
|       |    |     |                      |          | 0     | DB;GT:/0:25 0/1:49,4:37  | C | T |
|       |    |     |                      |          |       | SOM GT:/0:35 0/1:123,6:3 | T | G |
|       |    |     |                      |          | 0     | DB;GT:/0:42 0/1:132,9:3  | G | A |
|       |    |     |                      |          | 0     | DB;GT:/0:59 0/1:235,13   | C | T |
|       |    |     |                      |          | 0     | DB;GT:/0:65 0/1:265,14   | T | A |
|       |    |     |                      |          | 0     | DB;GT:/0:36 0/1:135,6:3  | C | T |
|       |    |     |                      |          | 0     | DB;GT:/0:35 0/1:138,6:3  | G | C |
|       |    |     |                      |          |       | DB;GT:/0:43 0/1:70,4:37  | C | T |
|       |    |     |                      |          | 0     | SOM GT:/0:8,(0/1:55,4:37 | G | A |
|       |    |     |                      |          | 0     | DB;GT:/0:22 0/1:103,8:3  | T | C |
|       |    |     |                      |          |       | DB;GT:/0:34 0/1:116,6:3  | G | T |
|       |    |     |                      |          | 0     | DB;GT:/0:38 0/1:156,6:3  | A | G |
|       |    |     |                      |          | 0     | DB;GT:/0:39 0/1:155,7:3  | G | C |
|       |    |     |                      |          | 0 0   | SOM GT:/0:8,(0/1:25,3:37 | C | A |
|       |    |     |                      |          | 0     | SOM GT:/0:22 0/1:71,4:37 | A | G |
|       |    |     |                      |          |       | DB;GT:/0:43 0/1:107,5:3  | C | T |
|       |    |     |                      |          | 0     | DB;GT:/0:43 0/1:184,7:3  | C | T |
|       |    |     |                      |          |       | DB;GT:/0:30 0/1:112,5:3  | C | T |
|       |    |     |                      |          |       | SOM GT:/0:14 0/1:38,3:37 | A | T |
|       |    |     |                      |          |       | DB;GT:/0:35 0/1:167,11   | A | C |
|       |    |     |                      |          | 0     | DB;GT:/0:27 0/1:117,8:3  | A | C |
|       |    |     |                      |          | 0     | DB;GT:/0:21 0/1:82,4:34  | T | C |
|       |    |     |                      |          |       | SOM GT:/0:33 0/1:61,8:34 | C | A |
|       |    | 0 0 | 0.6 0.0,B 0.0,B 1,N  |          | 0 0   | SOM GT:/0:79 0/1:161,7:3 | A | G |
|       |    |     |                      |          | 0 0   | SOM GT:/0:14 0/1:20,4:24 | A | C |
|       |    |     | 0.1,0.002 0.0,B 1,N  | 1.72     |       | SOM GT:/0:46 0/1:69,8:37 | C | G |
|       |    |     |                      |          |       | SOM GT:/0:35 0/1:85,5:31 | C | A |
|       |    |     |                      |          |       | SOM GT:/0:19 0/1:29,5:21 | T | G |
|       |    |     |                      | 3.2      |       | SOM GT:/0:58 0/1:122,7:3 | G | A |
|       |    |     |                      |          |       | SOM GT:/0:79 0/1:146,11  | G | T |
|       |    |     |                      |          |       | SOM GT:/0:14 0/1:28,3:37 | G | A |
|       |    |     |                      |          | 0 0   | SOM GT:/0:16 0/1:31,4:37 | T | G |
| 0.344 |    |     |                      |          | 0 0.2 | SOM GT:/0:11 0/1:9,4:37  | A | G |
| 0.177 |    |     |                      |          | 0 0.2 | SOM GT:/0:13 0/1:10,3:37 | C | A |
|       |    |     | 0.1370.458 1.00      | 4.9 3.16 | 0     | SOM GT:/0:25 0/1:30,4:37 | C | T |
|       |    |     |                      |          |       | SOM GT:/0:37 0/1:59,4:37 | A | G |
|       |    |     |                      |          | 0 0   | DB;GT:/0:29 0/1:39,4:37  | A | T |
|       |    |     |                      |          |       | SOM GT:/0:18 0/1:0,2:37  | G | A |
|       |    |     |                      |          |       | SOM GT:/0:33 0/1:42,4:34 | G | A |

|       |    |     |       |       |       |      |      |      |             |             |             |             |   |   |
|-------|----|-----|-------|-------|-------|------|------|------|-------------|-------------|-------------|-------------|---|---|
|       | ## | 0.0 | 0.985 | 1.0,D | 1.00  | 3.4  | 4.41 |      | SOMGT:/0:13 | 0/1:225,21  | C           | T           |   |   |
|       | 0  | 0   |       |       |       | 2.5  |      |      | SOMGT:/0:88 | 0/1:170,17  | G           | A           |   |   |
|       |    |     |       |       |       |      |      |      | SOMGT:/0:93 | 0/1:159,7:3 | G           | A           |   |   |
| 4E-04 |    |     |       |       |       |      |      |      | SOMGT:/0:21 | 0/1:29,5:26 | C           | T           |   |   |
|       |    |     |       |       |       | 4    |      |      | SOMGT:/0:55 | 0/1:104,7:3 | G           | A           |   |   |
|       |    |     |       |       |       | 1,N  |      |      | SOMGT:/0:10 | 0/1:165,13  | C           | T           |   |   |
|       | ## | ##  | 0     |       |       |      |      | 0    | SOMGT:/0:87 | 0/1:143,9:3 | C           | T           |   |   |
|       |    |     |       |       |       | 1.42 |      |      | SOMGT:/0:14 | 0/1:255,23  | C           | T           |   |   |
|       | 0  |     |       |       |       |      |      | 0    | SOMGT:/0:17 | 0/1:13,3:37 | C           | T           |   |   |
|       |    |     |       |       |       |      |      |      | SOMGT:/0:32 | 0/1:36,3:37 | G           | A           |   |   |
|       |    |     |       |       |       |      |      |      | SOMGT:/0:65 | 0/1:130,5:3 | G           | T           |   |   |
|       |    |     |       |       |       |      |      |      | SOMGT:/0:11 | 0/1:23,5:37 | G           | T           |   |   |
|       |    |     |       |       |       | 2.4  | 1.26 |      | SOMGT:/0:10 | 0/1:18,3:37 | C           | A           |   |   |
|       |    |     |       |       |       |      |      |      | SOMGT:/0:11 | 0/1:12,3:37 | G           | A           |   |   |
|       |    |     |       |       |       |      |      | 0    | 0.1         | SOMGT:/0:8, | 0/1:6,4:34  | T           | C |   |
|       |    |     |       |       |       |      |      | 0    | 0           | SOMGT:/0:26 | 0/1:35,3:37 | G           | T |   |
|       |    |     |       |       |       |      |      | 0    |             | SOMGT:/0:38 | 0/1:68,4:37 | C           | G |   |
|       |    |     |       |       |       | 3.1  |      |      |             | SOMGT:/0:24 | 0/1:40,7:37 | C           | T |   |
|       |    |     |       |       |       |      |      | 0    |             | SOMGT:/0:22 | 0/1:50,11:1 | A           | C |   |
|       |    |     |       |       |       |      |      |      |             | SOMGT:/0:19 | 0/1:28,3:37 | C           | G |   |
|       |    |     | 0.0   | 0.805 | 0.975 | 0.81 | 3.51 |      |             | DB;S        | GT:/0:37    | 0/1:55,5:37 | C | A |
|       |    |     |       |       |       |      |      | 0    |             | DB;S        | GT:/0:34    | 0/1:75,4:34 | C | A |
|       |    |     |       |       |       |      |      |      |             | SOMGT:/0:17 | 0/1:27,7:16 | A           | C |   |
| 2E-04 |    |     |       |       |       |      |      | 0    | 0           | SOMGT:/0:11 | 0/1:33,3:37 | T           | C |   |
|       |    |     |       |       |       |      |      | 0    |             | SOMGT:/0:85 | 0/1:173,6:3 | T           | C |   |
|       | ## | 0   |       |       |       |      |      |      |             | SOMGT:/0:75 | 0/1:156,15  | G           | A |   |
|       |    |     |       |       |       |      |      |      |             | SOMGT:/0:39 | 0/1:76,8:37 | G           | T |   |
|       | ## | 0   | 0.0   | 0.961 | 0.998 | 0.76 | 2.6  | 3.22 |             | SOMGT:/0:17 | 0/1:294,23  | T           | G |   |
|       |    |     |       |       |       | 2.9  |      |      |             | SOMGT:/0:42 | 0/1:75,4:37 | C           | T |   |
|       |    |     |       |       |       |      |      |      |             | SOMGT:/0:17 | 0/1:41,7:33 | C           | T |   |
|       |    |     |       |       |       |      |      |      |             | SOMGT:/0:21 | 0/1:33,3:37 | G           | T |   |
|       |    |     |       |       |       |      |      |      |             | SOMGT:/0:87 | 0/1:157,7:3 | C           | A |   |
|       |    |     |       |       |       |      |      | 0    |             | SOMGT:/0:23 | 0/1:27,3:37 | A           | G |   |
|       |    |     |       |       |       |      |      |      |             | SOMGT:/0:41 | 0/1:71,9:34 | C           | A |   |
|       |    |     |       |       |       |      |      | 0.1  | 0.2         | SOMGT:/0:10 | 0/1:17,4:37 | C           | T |   |
|       |    |     |       |       |       |      |      | 0    | 0           | SOMGT:/0:41 | 0/1:41,3:37 | C           | T |   |
|       |    |     |       |       |       |      |      | 0    |             | SOMGT:/0:54 | 0/1:104,5:3 | A           | G |   |
|       |    |     |       |       |       |      |      |      |             | SOMGT:/0:9, | 0/1:14,3:37 | G           | A |   |
|       |    |     |       |       |       |      |      |      |             | SOMGT:/0:29 | 0/1:63,4:37 | C           | T |   |
|       |    |     |       |       |       |      |      |      |             | SOMGT:/0:12 | 0/1:9,3:37  | T           | G |   |
|       |    |     |       |       |       |      |      |      |             | SOMGT:/0:56 | 0/1:101,5:3 | C           | T |   |
|       |    |     |       |       |       |      |      |      |             | SOMGT:/0:20 | 0/1:50,4:37 | C           | T |   |
| 1E-03 | 0  | 0   |       |       |       |      |      | 0    | 0           | SOMGT:/0:18 | 0/1:330,16  | G           | A |   |
| 0.03  |    |     |       |       |       |      |      | 0    | 0           | SOMGT:/0:22 | 0/1:40,3:37 | C           | T |   |
|       | ## | ##  | 0     |       |       |      |      |      |             | SOMGT:/0:63 | 0/1:126,13  | C           | T |   |
|       |    |     |       |       |       | 3.5  |      |      |             | SOMGT:/0:56 | 0/1:87,9:35 | G           | A |   |
|       |    |     |       |       |       | 2.38 |      |      |             | SOMGT:/0:25 | 0/1:31,3:37 | G           | A |   |
|       |    |     |       |       |       |      |      |      |             | SOMGT:/0:26 | 0/1:63,4:37 | C           | A |   |
|       |    |     |       |       |       |      |      | 0    | 0.1         | SOMGT:/0:31 | 0/1:19,4:37 | G           | T |   |
| 0.034 |    |     |       |       |       |      |      |      |             | SOMGT:/0:11 | 0/1:17,4:37 | T           | C |   |
|       |    |     | 0.0   | 0.754 | 0.898 | 0.97 | 5    | 3.18 |             | SOMGT:/0:11 | 0/1:219,22  | C           | T |   |
|       | ## | 0   | 0.0   | 0.805 | 0.998 | 1,D  | 5.1  | 3.90 |             | SOMGT:/0:48 | 0/1:99,6:35 | C           | T |   |
|       |    |     |       |       |       | 2.6  |      |      |             | SOMGT:/0:93 | 0/1:181,16  | G           | A |   |
|       | 0  | 0   | 0.0   | 0.999 | 1.0,D | 1,D  | 4.9  | 3.75 |             | SOMGT:/0:43 | 0/1:81,4:37 | G           | A |   |

|       |   |    |           |           |       |       |      |      |                                |                           |     |                              |   |
|-------|---|----|-----------|-----------|-------|-------|------|------|--------------------------------|---------------------------|-----|------------------------------|---|
|       |   |    |           |           |       |       |      |      | SOMGT:/0:26 0/1:116,5:3 G      | C                         |     |                              |   |
|       |   |    |           |           |       |       |      | 0.   | SOMGT:/0:13 0/1:43,6:37 T      | C                         |     |                              |   |
|       |   |    |           |           |       |       |      | 0.   | SOMGT:/0:13 0/1:44,4:37 A      | G                         |     |                              |   |
| 0.048 | 0 |    |           |           |       |       |      | 0    | 0 DB;SOMGT:/0:60 0/1:107,9:3 A | T                         |     |                              |   |
|       |   |    | 0.0,0.416 | 0.974     | 0.93  | 4.8   |      |      | SOMGT:/0:71 0/1:166,13 G       | A                         |     |                              |   |
|       |   |    | 0.4       | 0.001     | 0.0,B | 1.00  |      |      | SOMGT:/0:89 0/1:195,17 T       | C                         |     |                              |   |
|       |   |    |           |           |       |       |      |      | SOMGT:/0:65 0/1:150,10 C       | T                         |     |                              |   |
|       |   |    |           |           |       |       |      |      | SOMGT:/0:17 0/1:35,5:37 C      | A                         |     |                              |   |
|       |   |    |           |           |       |       |      |      | SOMGT:/0:20 0/1:37,6:37 G      | A                         |     |                              |   |
|       |   | 0  | 0         |           |       |       | 3.39 |      | SOMGT:/0:17 0/1:15,3:37 G      | A                         |     |                              |   |
|       |   |    |           |           |       |       |      |      | SOMGT:/0:26 0/1:99,6:35 T      | C                         |     |                              |   |
|       |   |    |           |           |       |       |      |      | SOMGT:/0:29 0/1:107,5:3 G      | A                         |     |                              |   |
|       |   |    |           |           |       |       |      |      | SOMGT:/0:22 0/1:68,10:3 C      | A                         |     |                              |   |
|       |   | ## | 0         |           |       |       |      |      | SOMGT:/0:95 0/1:120,52 C       | T                         |     |                              |   |
|       |   |    |           |           |       |       |      |      | SOMGT:/0:40 0/1:83,12:3 C      | G                         |     |                              |   |
| 2E-04 | 0 | 0  | 0         | 0.8       | 0.062 | 0.877 | 0.99 | 4.2  | 2.67                           | SOMGT:/0:92 0/1:141,9:3 C | T   |                              |   |
|       |   |    |           | 0.0,0.38, | 0.273 | 1,D   | 5.4  | 4.81 |                                | SOMGT:/0:14 0/1:192,47 C  | T   |                              |   |
|       |   |    |           |           |       |       |      | 0    | 0                              | SOMGT:/0:17 0/1:26,6:33 G | A   |                              |   |
| 0.081 |   |    |           |           |       |       |      | 0    | 0.4                            | SOMGT:/0:8,(0/1:3,2:37: G | C   |                              |   |
|       |   |    |           |           |       |       |      |      |                                | SOMGT:/0:31 0/1:31,3:37 T | A   |                              |   |
|       |   |    |           |           |       |       |      | 0    | 0                              | SOMGT:/0:8,(0/1:15,5:37 C | T   |                              |   |
|       |   |    |           | 0.0,0.052 | 0.103 | 1,N   | 3    | 2.65 |                                | SOMGT:/0:40 0/1:54,13:3 G | C   |                              |   |
| 2E-04 |   |    |           |           |       |       |      |      |                                | SOMGT:/0:13 0/1:11,4:37 C | T   |                              |   |
| 0.001 | 0 | 0  | 0         | 0.2       | 0.005 | 0.055 | 1,D  | 5    | 3.03                           | 0                         | 0   | SOMGT:/0:46 0/1:49,18:3 G    | A |
|       |   |    |           |           |       |       |      |      |                                |                           |     | SOMGT:/0:13 0/1:17,5:37 G    | A |
|       |   |    |           |           |       |       |      | 2.3  | 1.84                           |                           |     | SOMGT:/0:86 0/1:102,35 G     | A |
|       |   | ## | 0         | 0.0       | 0.001 | 0.002 | 1,D  | 3.2  | 2.14                           |                           |     | SOMGT:/0:93 0/1:97,26:3 G    | A |
|       |   |    |           | 0.0       | 0.18, | 0.236 | 1.00 | 6.2  | 2.89                           |                           |     | SOMGT:/0:39 0/1:67,4:37 C    | T |
|       |   |    |           | 0.0       | 0.998 | 1.0,D | 1,D  | 5.9  | 5.31                           |                           |     | SOMGT:/0:30 0/1:50,5:37 G    | C |
|       |   |    |           |           |       |       |      | 2.3  | 2.51                           |                           |     | SOMGT:/0:37 0/1:78,13:3 G    | T |
|       |   |    |           |           |       |       |      |      |                                |                           |     | SOMGT:/0:25 0/1:60,7:37 G    | T |
|       |   |    |           |           |       |       |      |      |                                |                           |     | SOMGT:/0:12 0/1:26,7:37 G    | C |
|       |   |    |           |           |       |       |      |      |                                | 0                         |     | SOMGT:/0:18 0/1:36,3:37 A    | G |
|       |   | ## | 0         | 0.0       | 0.002 | 0.029 | 1,N  | 1.80 |                                |                           |     | SOMGT:/0:23 0/1:325,84 C     | T |
|       |   |    |           |           |       |       |      |      |                                | 0                         | 0.1 | SOMGT:/0:8,(0/1:6,2:37: C    | A |
|       |   |    |           |           |       |       |      | 2.2  | 1.31                           |                           |     | SOMGT:/0:41 0/1:57,23:3 C    | T |
|       |   |    |           |           |       |       |      |      |                                |                           |     | SOMGT:/0:28 0/1:37,14:3 C    | G |
|       |   |    |           |           |       |       |      |      |                                |                           |     | SOMGT:/0:20 0/1:38,4:37 G    | A |
|       |   |    |           |           |       |       |      |      |                                |                           |     | SOMGT:/0:10 0/1:15,5:37 G    | A |
|       |   |    |           |           |       |       |      |      |                                |                           |     | SOMGT:/0:11 0/1:19,4:37 G    | A |
|       |   |    |           |           |       |       |      |      |                                |                           |     | SOMGT:/0:8,(0/1:6,2:37: C    | A |
|       |   |    |           |           |       |       |      |      |                                |                           |     | SOMGT:/0:31 0/1:52,14:3 G    | A |
|       |   |    |           |           |       |       |      | 1.48 |                                |                           |     | SOMGT:/0:56 0/1:66,10:3 G    | A |
|       |   |    |           |           |       |       |      |      |                                |                           |     | SOMGT:/0:10 0/1:146,43 G     | A |
|       |   | 0  | 0         |           |       |       |      |      |                                | 0                         | 0.3 | SOMGT:/0:11 0/1:24,7:37 G    | A |
|       |   |    |           |           |       |       |      |      |                                | 0                         | 0   | SOMGT:/0:12 0/1:12,4:37 C    | T |
|       |   |    |           |           |       |       |      |      |                                |                           |     | SOMGT:/0:9,(0/1:6,2:37: C    | T |
|       |   |    |           |           |       |       |      |      |                                | 0                         | 0   | SOMGT:/0:13 0/1:12,3:33 G    | A |
|       |   |    |           |           |       |       |      |      |                                | 0                         | 0   | SOMGT:/0:41 0/1:80,4:37 A    | G |
|       |   |    |           |           |       |       |      |      |                                | 0                         | 0.1 | SOMGT:/0:20 0/1:37,6:37 C    | G |
|       |   |    |           |           |       |       |      |      |                                | 0                         |     | DB;SOMGT:/0:52 0/1:60,8:37 A | T |
|       |   |    |           |           |       |       |      |      |                                |                           |     | SOMGT:/0:68 0/1:130,5:3 T    | G |
|       |   |    |           |           |       |       |      |      |                                |                           |     | SOMGT:/0:9,(0/1:6,2:37: A    | G |
|       |   |    |           |           |       |       |      |      |                                |                           |     | SOMGT:/0:8,(0/1:14,3:33 G    | A |

|       |    |    |   |     |       |       |      |                      |       |                            |                            |   |
|-------|----|----|---|-----|-------|-------|------|----------------------|-------|----------------------------|----------------------------|---|
|       |    |    |   |     |       |       |      |                      |       | SOM GT:/0:19 0/1:32,4:37 C | A                          |   |
|       |    |    |   |     |       |       |      |                      | 0.    | DB;GT:/0:27 0/1:36,4:37 C  | T                          |   |
|       |    |    |   |     |       |       |      |                      |       | SOM GT:/0:16 0/1:191,8:3 T | G                          |   |
|       |    |    |   |     |       |       |      |                      |       | SOM GT:/0:18 0/1:169,15 C  | G                          |   |
|       |    |    |   |     |       |       |      |                      | 0 0   | SOM GT:/0:12 0/1:12,4:37 G | A                          |   |
|       |    |    |   |     |       |       |      |                      | 0 0   | SOM GT:/0:12 0/1:12,4:37 G | A                          |   |
|       |    |    |   |     |       |       |      | 1.97                 | 0 0   | SOM GT:/0:11 0/1:12,3:37 G | C                          |   |
|       |    |    |   |     |       |       |      |                      |       | SOM GT:/0:9,(0/1:8,16:36 G | A                          |   |
| 0.398 |    |    |   |     |       |       |      |                      | 0 0.2 | SOM GT:/0:24 0/1:41,7:37 C | T                          |   |
|       |    |    |   |     |       |       |      |                      | 0.    | SOM GT:/0:14 0/1:17,4:37 T | A                          |   |
|       |    |    |   |     |       |       |      | 1.76                 |       | SOM GT:/0:18 0/1:40,9:37 C | T                          |   |
|       |    |    |   |     |       |       |      |                      |       | SOM GT:/0:62 0/1:92,28:3 C | G                          |   |
|       |    |    |   |     |       |       |      |                      |       | SOM GT:/0:31 0/1:37,10:3 C | A                          |   |
|       |    |    |   |     |       |       |      |                      |       | SOM GT:/0:69 0/1:120,29 A  | T                          |   |
|       |    |    |   |     |       |       |      |                      |       | SOM GT:/0:19 0/1:32,12:2 G | T                          |   |
|       |    |    |   |     |       |       |      | 3.3 1.34             |       | SOM GT:/0:51 0/1:74,5:37 C | T                          |   |
|       |    |    |   |     |       |       |      | 2.8 1.23             |       | SOM GT:/0:85 0/1:183,14 C  | T                          |   |
|       |    |    |   |     |       |       |      | 2                    |       | SOM GT:/0:42 0/1:58,4:37 C | T                          |   |
|       |    |    |   |     |       |       |      | 0.3 0.082 0.11,1,1,N |       | SOM GT:/0:58 0/1:77,28:3 C | G                          |   |
| 2E-04 | 0  | 0  | 0 |     |       |       |      |                      |       | SOM GT:/0:12 0/1:20,3:37 G | A                          |   |
|       | ## | 0  | 0 | 0.0 | 0.333 | 0.988 | 1.00 | 5.6                  | 3.54  |                            | SOM GT:/0:52 0/1:81,26:3 G | A |
|       |    |    |   | 0.1 | 0.582 | 0.994 | 0.99 | 2.6                  | 3.80  |                            | SOM GT:/0:25 0/1:60,5:37 G | A |
|       |    |    |   | 0.0 | 1.0,D | 1.0,D | 1,D  | 5.7                  | 5.03  | 0.                         | SOM GT:/0:75 0/1:121,27 C  | T |
|       |    |    |   |     |       |       |      |                      |       |                            | SOM GT:/0:13 0/1:16,3:37 G | A |
|       |    |    |   |     |       |       |      |                      |       |                            | SOM GT:/0:38 0/1:64,14:3 G | A |
|       |    |    |   |     |       |       |      | 1.87                 |       |                            | SOM GT:/0:28 0/1:44,12:3 C | T |
|       |    |    |   |     |       |       |      |                      |       |                            | SOM GT:/0:9,(0/1:20,8:33 C | G |
|       |    |    |   |     |       |       |      | 3.4                  |       |                            | DB;GT:/0:40 0/1:76,25:3 G  | C |
|       |    |    |   |     |       |       |      |                      |       |                            | SOM GT:/0:31 0/1:49,16:3 G | C |
|       |    |    |   |     |       |       |      |                      |       | 0.                         | SOM GT:/0:9,(0/1:5,2:37: C | A |
|       |    |    |   |     |       |       |      | 4.1                  |       |                            | SOM GT:/0:69 0/1:81,25:3 C | T |
|       |    |    |   |     |       |       |      | 3.9                  |       |                            | SOM GT:/0:13 0/1:28,3:37 C | T |
|       |    |    |   |     |       |       |      |                      |       |                            | SOM GT:/0:36 0/1:58,19:3 A | G |
|       |    |    |   |     |       |       |      | 1.61                 |       |                            | SOM GT:/0:17 0/1:21,3:37 C | G |
|       |    |    |   |     |       |       |      |                      |       |                            | SOM GT:/0:12 0/1:10,3:37 C | G |
|       |    |    |   |     |       |       |      |                      |       | 0.                         | SOM GT:/0:27 0/1:37,12:3 C | T |
|       |    |    |   |     |       |       |      | 2.6                  |       | 0                          | SOM GT:/0:31 0/1:58,4:37 C | T |
|       | ## | ## | 0 |     |       |       |      |                      |       |                            | SOM GT:/0:59 0/1:87,17:3 C | T |
|       |    |    |   |     |       |       |      |                      |       |                            | SOM GT:/0:77 0/1:107,20 C  | T |
|       |    |    |   |     |       |       |      | 1.57                 |       |                            | SOM GT:/0:39 0/1:48,7:33 G | A |
|       |    |    |   |     |       |       |      |                      |       | 0.                         | SOM GT:/0:17 0/1:23,3:37 A | G |
|       |    |    |   |     |       |       |      |                      |       | 0.                         | SOM GT:/0:18 0/1:24,3:37 C | A |
|       |    |    |   |     |       |       |      | 1.90                 |       |                            | SOM GT:/0:27 0/1:30,5:31 C | T |
|       |    |    |   |     |       |       |      |                      | 0.1   | 0.5                        | SOM GT:/0:8,(0/1:10,5:37 G | A |
|       |    |    |   |     |       |       |      |                      | 0     | 0.1                        | SOM GT:/0:8,(0/1:13,3:37 T | C |
|       |    |    |   |     |       |       |      | 3.8 1.39             |       |                            | SOM GT:/0:90 0/1:123,26 C  | T |
|       |    |    |   |     |       |       |      |                      |       |                            | SOM GT:/0:29 0/1:37,15:3 G | A |
|       |    |    |   |     |       |       |      | 1.92                 |       |                            | SOM GT:/0:31 0/1:35,12:3 G | C |
| 0.408 |    |    |   |     |       |       |      |                      | 0     | 0                          | DB;GT:/0:28 0/1:62,5:37 A  | T |
|       |    |    |   |     |       |       |      | 5.4 3.63             |       |                            | SOM GT:/0:10 0/1:180,7:3 C | T |
|       |    |    |   |     |       |       |      |                      |       |                            | SOM GT:/0:16 0/1:27,3:37 C | T |
| 0.739 |    | 1  | 1 |     |       |       |      |                      | 0     | 0                          | SOM GT:/0:17 0/1:40,3:37 T | C |
|       |    |    |   |     |       |       |      |                      | 0.    |                            | SOM GT:/0:9,(0/1:16,3:37 A | G |
|       |    |    |   |     |       |       |      |                      |       |                            | SOM GT:/0:18 0/1:139,15 C  | T |

|       |    |    |     |                      |     |       |       |     |                              |   |
|-------|----|----|-----|----------------------|-----|-------|-------|-----|------------------------------|---|
| .     | .  | .  | .   | .                    | .   | .     | .     | .   | SOM GT:/0:17 0/1:26,7:35G    | T |
| .     | .  | .  | .   | .                    | .   | .     | .     | .   | SOM GT:/0:22 0/1:40,3:37G    | C |
| .     | .  | .  | .   | .                    | .   | .     | .     | .   | SOM GT:/0:14 0/1:21,7:14T    | G |
| .     | .  | .  | 0.1 | 0.1040.2910.94       | 2.4 | 2.90. | .     | .   | SOM GT:/0:37 0/1:64,18:3C    | T |
| .     | .  | .  | .   | .                    | .   | .     | .     | .   | SOM GT:/0:15 0/1:10,6:15T    | G |
| .     | .  | .  | .   | .                    | .   | .     | .     | .   | SOM GT:/0:9,(0/1:16,4:30T    | C |
| .     | .  | .  | .   | .                    | .   | .     | .     | .   | SOM GT:/0:33 0/1:41,12:3C    | T |
| .     | .  | .  | 0.3 | 0.05, 0.1181,N       | .   | .     | .     | .   | SOM GT:/0:26 0/1:47,11:3G    | A |
| .     | .  | .  | .   | .                    | .   | .     | .     | .   | SOM GT:/0:13 0/1:30,9:37G    | A |
| .     | .  | .  | .   | .                    | .   | .     | .     | .   | SOM GT:/0:25 0/1:20,5:37C    | T |
| .     | .  | .  | .   | .                    | .   | .     | .     | .   | SOM GT:/0:67 0/1:114,5:3G    | A |
| .     | .  | .  | .   | .                    | .   | .     | .     | .   | SOM GT:/0:45 0/1:89,22:3G    | A |
| .     | .  | .  | .   | .                    | .   | .     | .     | .   | SOM GT:/0:16 0/1:23,4:37G    | A |
| .     | .  | .  | .   | .                    | .   | .     | .     | .   | SOM GT:/0:10 0/1:14,3:37G    | T |
| .     | .  | .  | 0.0 | 0.1660.1461,D        | 5.5 | 4.87. | .     | .   | SOM GT:/0:37 0/1:47,18:3C    | G |
| .     | .  | .  | .   | .                    | .   | .     | .     | .   | SOM GT:/0:55 0/1:95,22:3C    | T |
| .     | .  | .  | .   | .                    | .   | .     | .     | .   | SOM GT:/0:15 0/1:29,6:37G    | A |
| .     | .  | .  | .   | .                    | 4.6 | 2.01. | .     | .   | SOM GT:/0:98 0/1:168,47 C    | T |
| .     | .  | .  | 0.1 | 0.3760.7221,D        | 5.4 | 4.72. | .     | .   | SOM GT:/0:10 0/1:179,35 C    | T |
| .     | .  | .  | .   | .                    | .   | .     | .     | .   | SOM GT:/0:16 0/1:271,65 G    | A |
| .     | .  | ## | .   | .                    | .   | 1.27  | 0.    | .   | SOM GT:/0:17 0/1:225,71 C    | T |
| .     | ## | .  | 0.1 | 0.67, 0.9391.00      | 5.4 | 4.66. | .     | .   | SOM GT:/0:10 0/1:165,17 G    | A |
| .     | .  | ## | 0.  | .                    | .   | .     | .     | .   | SOM GT:/0:52 0/1:100,24 G    | A |
| .     | .  | .  | .   | .                    | .   | .     | .     | .   | SOM GT:/0:33 0/1:50,21:3A    | T |
| 6E-04 | 0  | 0  | 0   | .                    | .   | 3.1   | .     | .   | SOM GT:/0:17 0/1:22,10:3G    | A |
| .     | .  | .  | 0.1 | 0.0050.0111,N        | .   | .     | .     | .   | SOM GT:/0:79 0/1:289,9:3C    | T |
| .     | .  | .  | 0.1 | 0.2030.4371,N        | 3.6 | 3.56. | .     | .   | SOM GT:/0:68 0/1:221,12 C    | G |
| .     | .  | .  | .   | .                    | .   | .     | .     | .   | SOM GT:/0:43 0/1:107,15 C    | T |
| .     | .  | .  | 0.0 | 0.9930.9991.00       | 3.5 | 3.61. | .     | .   | SOM GT:/0:11 0/1:373,11 C    | T |
| .     | .  | .  | .   | .                    | .   | .     | .     | .   | SOM GT:/0:21 0/1:61,14:3C    | T |
| .     | .  | .  | 0.1 | 0.5990.8731,N        | 4.2 | 1.92. | .     | .   | SOM GT:/0:68 0/1:207,25 C    | T |
| .     | .  | .  | .   | .                    | .   | .     | .     | .   | SOM GT:/0:41 0/1:145,25 C    | T |
| .     | .  | .  | .   | .                    | .   | 2.9   | .     | .   | SOM GT:/0:71 0/1:209,23 G    | A |
| .     | .  | .  | .   | .                    | .   | .     | .     | .   | SOM GT:/0:32 0/1:121,28 C    | T |
| 0.002 | 0  | 0  | 0   | .                    | .   | .     | .     | .   | SOM GT:/0:26 0/1:60,64:3G    | A |
| .     | .  | .  | .   | .                    | 1,D | 3.4   | 8.37. | .   | SOM GT:/0:59 0/1:178,17 C    | A |
| .     | .  | .  | .   | .                    | .   | .     | .     | .   | SOM GT:/0:11 0/1:361,52 G    | A |
| .     | .  | .  | .   | .                    | .   | .     | .     | .   | SOM GT:/0:13 0/1:44,5:37T    | G |
| .     | .  | .  | .   | .                    | .   | 2.8   | .     | .   | SOM GT:/0:9,(0/1:25,6:37G    | C |
| .     | .  | .  | .   | .                    | .   | 2.10. | .     | .   | SOM GT:/0:18 0/1:41,20:3C    | T |
| .     | .  | .  | .   | .                    | .   | .     | .     | .   | SOM GT:/0:25 0/1:77,12:3G    | A |
| .     | .  | .  | .   | .                    | .   | .     | .     | .   | SOM GT:/0:40 0/1:116,40 G    | C |
| .     | .  | .  | .   | .                    | .   | 5.6   | .     | .   | SOM GT:/0:70 0/1:245,30 C    | T |
| .     | .  | .  | 0.4 | 1.0,D1.0,D1,N        | .   | .     | .     | .   | SOM GT:/0:93 0/1:154,19 C    | G |
| .     | .  | .  | .   | .                    | .   | .     | .     | .   | SOM GT:/0:22 0/1:68,9:34G    | A |
| .     | .  | .  | .   | .                    | .   | .     | .     | .   | SOM GT:/0:24 0/1:46,11:3G    | A |
| .     | .  | .  | .   | .                    | .   | .     | .     | .   | SOM GT:/0:8,(0/1:18,7:37C    | T |
| .     | .  | .  | .   | .                    | .   | .     | 0.    | .   | SOM GT:/0:17 0/1:54,5:37C    | T |
| .     | .  | .  | .   | .                    | .   | .     | 0     | 0   | SOM GT:/0:10 0/1:28,5:34C    | T |
| .     | .  | .  | .   | .                    | .   | .     | 0     | 0   | SOM GT:/0:11 0/1:36,5:31G    | A |
| .     | .  | .  | .   | .                    | .   | .     | 0     | 0   | SOM GT:/0:14 0/1:45,5:37C    | T |
| .     | .  | .  | .   | .                    | .   | .     | 0.4   | 0.4 | DB;SOM GT:/0:41 0/1:72,10:3C | T |
| .     | .  | 0  | 0   | .                    | .   | 2.1   | .     | .   | SOM GT:/0:84 0/1:131,43 C    | T |
| .     | .  | ## | 0   | 0.0,0.0,B 0.0,B 1.00 | 3   | 2.06  | 0.    | .   | SOM GT:/0:42 0/1:75,20:3G    | A |

|       |  |    |     |       |       |       |      |      |                                 |   |
|-------|--|----|-----|-------|-------|-------|------|------|---------------------------------|---|
|       |  |    |     |       |       |       |      |      | SOM GT:/0:10 0/1:21,3:37 G      | A |
|       |  |    |     |       | 4     | 1.61  |      |      | SOM GT:/0:21 0/1:31,10:3 G      | A |
|       |  |    | 0.0 | 0.97  | 0.99  | 1,1,D | 5.6  | 4.79 | SOM GT:/0:57 0/1:113,29 C       | G |
|       |  |    |     |       |       |       |      | 0    | 0 DB;SOM GT:/0:20 0/1:14,5:34 G | T |
|       |  |    |     |       |       |       |      |      | SOM GT:/0:19 0/1:41,5:34 G      | A |
| 2E-04 |  |    |     |       |       |       |      |      | SOM GT:/0:38 0/1:77,27:3 C      | T |
|       |  |    |     |       |       |       |      |      | SOM GT:/0:14 0/1:15,7:37 G      | C |
|       |  |    |     |       |       |       |      | 0    | 0.1 SOM GT:/0:9,(0/1:22,3:37 C  | A |
|       |  |    |     |       |       |       |      |      | SOM GT:/0:18 0/1:35,11:3 C      | T |
|       |  |    |     |       |       |       |      |      | SOM GT:/0:28 0/1:50,13:3 G      | A |
| 0.108 |  |    |     |       |       |       | 1.30 | 0    | 0 SOM GT:/0:9,(0/1:11,3:33 A    | T |
|       |  |    | 0.0 | 1.0,D | 1.0,D | 1,D   | 4.7  | 4.00 | SOM GT:/0:17 0/1:265,68 G       | C |
|       |  |    |     |       |       |       |      | 0    | SOM GT:/0:11 0/1:21,4:37 A      | G |
|       |  |    |     |       |       |       | 3.1  |      | SOM GT:/0:26 0/1:33,7:18 T      | G |
|       |  |    |     |       |       |       |      |      | SOM GT:/0:10 0/1:34,5:37 T      | C |
|       |  |    |     |       |       |       |      | 0    | 0 SOM GT:/0:10 0/1:18,3:37 G    | C |
|       |  |    | 0.5 | 0.003 | 0.001 | 1,D   | 5.8  |      | SOM GT:/0:17 0/1:322,15 G       | A |
|       |  |    |     |       |       |       |      |      | SOM GT:/0:10 0/1:21,3:37 C      | T |
|       |  |    |     |       |       |       |      |      | SOM GT:/0:14 0/1:26,13:3 G      | A |
|       |  |    |     |       |       |       |      |      | SOM GT:/0:14 0/1:22,8:12 A      | C |
|       |  |    |     |       |       |       |      |      | SOM GT:/0:14 0/1:38,7:37 G      | A |
|       |  |    |     |       |       |       | 2.5  |      | SOM GT:/0:11 0/1:20,5:37 T      | A |
|       |  |    |     |       |       |       |      |      | SOM GT:/0:11 0/1:13,6:37 C      | T |
|       |  |    |     |       |       |       |      |      | SOM GT:/0:29 0/1:48,8:37 G      | C |
|       |  |    |     |       |       |       |      | 0    | 0 SOM GT:/0:22 0/1:49,15:3 C    | T |
|       |  |    |     |       |       |       |      |      | SOM GT:/0:26 0/1:43,14:3 C      | T |
|       |  |    |     |       |       | 1,A   | 7.72 |      | SOM GT:/0:37 0/1:58,14:3 C      | T |
|       |  |    | 0.0 | 0.992 | 1.0,D | 1,D   | 5.8  | 5.12 | SOM GT:/0:69 0/1:110,28 C       | T |
|       |  |    |     |       |       |       | 2.1  | 1.99 | SOM GT:/0:35 0/1:36,12:3 C      | A |
|       |  |    |     |       |       |       | 2.08 |      | SOM GT:/0:12 0/1:21,6:30 C      | A |
|       |  |    |     |       |       |       |      |      | SOM GT:/0:40 0/1:70,15:3 A      | C |
|       |  |    |     |       |       |       |      |      | SOM GT:/0:24 0/1:45,12:3 C      | T |
|       |  |    |     |       |       |       |      |      | SOM GT:/0:10 0/1:23,3:37 G      | C |
|       |  |    |     |       |       |       |      |      | SOM GT:/0:31 0/1:63,4:37 G      | A |
| 1E-03 |  |    |     |       |       |       | 1.83 | 0    | SOM GT:/0:12 0/1:35,3:37 G      | A |
|       |  |    |     |       |       |       | 3.63 |      | SOM GT:/0:83 0/1:80,26:3 C      | T |
|       |  |    |     |       |       |       | 3.2  |      | SOM GT:/0:13 0/1:209,7:3 G      | C |
|       |  | ## | 0.4 | 0.474 | 0.986 | 1.00  | 5.9  | 2.50 | SOM GT:/0:31 0/1:64,5:37 C      | G |
|       |  |    |     |       |       |       |      |      | SOM GT:/0:12 0/1:37,5:37 C      | G |
|       |  |    | 0.0 | 0.045 | 0.088 | 0.99  | 5.6  | 2.43 | SOM GT:/0:68 0/1:114,21 C       | G |
|       |  | ## | 0   |       |       |       | 5.2  | 1.69 | SOM GT:/0:24 0/1:411,94 G       | A |
|       |  |    | 0.2 | 0.007 | 0.017 | 1,N   |      |      | SOM GT:/0:76 0/1:130,30 C       | T |
|       |  |    | 0.0 | 0.106 | 0.358 | 1,N   |      |      | SOM GT:/0:92 0/1:170,45 C       | G |
|       |  |    |     |       |       |       |      |      | SOM GT:/0:12 0/1:14,5:37 C      | T |
|       |  |    |     |       |       |       | 4    |      | SOM GT:/0:49 0/1:97,12:3 G      | C |
|       |  |    |     |       |       |       |      |      | SOM GT:/0:15 0/1:31,10:3 G      | C |
|       |  |    |     |       |       |       |      |      | SOM GT:/0:34 0/1:63,9:37 G      | A |
|       |  |    |     |       |       |       |      |      | SOM GT:/0:15 0/1:33,9:35 G      | A |
|       |  |    |     |       |       |       |      |      | SOM GT:/0:12 0/1:237,42 G       | A |
|       |  |    | 0.0 | 0.794 | 0.988 | 1.00  | 3.8  | 3.27 | SOM GT:/0:97 0/1:156,49 C       | T |
| 2E-04 |  | 0  | 0   |       |       |       |      |      | SOM GT:/0:59 0/1:115,7:3 C      | T |
|       |  |    |     |       |       |       | 2.4  | 1.28 | SOM GT:/0:18 0/1:332,10 C       | T |
|       |  |    |     |       |       |       |      |      | SOM GT:/0:13 0/1:286,10 C       | T |
|       |  |    |     |       |       |       |      |      | SOM GT:/0:37 0/1:50,18:3 C      | A |

|       |    |    |     |       |       |       |      |      |                           |                                |   |
|-------|----|----|-----|-------|-------|-------|------|------|---------------------------|--------------------------------|---|
|       |    |    |     |       |       |       |      |      | SOM GT:/0:24 0/1:35,8:17T | G                              |   |
|       | ## |    |     |       |       |       | 4.09 | 0    | SOM GT:/0:13 0/1:23,8:17A | C                              |   |
| 2E-04 | ## | 0  | 0.0 | 0.82E | 0.997 | 1.00  | 5.4  | 3.50 | 0                         | SOM GT:/0:14 0/1:195,46 C      | T |
| 0.003 | 0  | 0  | 0   | 0.0   | 0.0,B | 0.0,B | 1,N  |      |                           | SOM GT:/0:42 0/1:74,15:G       | A |
|       |    |    |     |       |       |       |      |      |                           | SOM GT:/0:48 0/1:103,5:G       | G |
|       |    |    |     |       |       |       |      |      |                           | SOM GT:/0:15 0/1:27,8:37C      | T |
|       | ## | 0  |     |       |       |       | 1.60 |      |                           | SOM GT:/0:21 0/1:36,6:37C      | T |
|       |    |    | 0.0 | 0.99E | 1.0,D | 1.00  | 6.2  | 5.48 |                           | SOM GT:/0:70 0/1:131,26 C      | T |
| 8E-04 |    |    |     |       |       |       |      |      |                           | SOM GT:/0:8,(0/1:7,3:37: G     | A |
|       |    |    |     |       |       |       |      |      |                           | SOM GT:/0:98 0/1:146,39 G      | C |
|       | 0  | ## | 0   |       |       |       |      |      |                           | SOM GT:/0:57 0/1:80,23:G       | A |
|       |    |    |     |       |       |       |      |      |                           | SOM GT:/0:59 0/1:97,21:G       | T |
|       |    |    |     |       |       |       |      |      |                           | SOM GT:/0:26 0/1:32,4:37G      | T |
|       |    |    |     |       |       |       |      |      |                           | SOM GT:/0:14 0/1:19,7:37C      | T |
| 0.008 | 0  | 0  | 0   |       |       |       |      |      | 0                         | SOM GT:/0:50 0/1:70,22:G       | T |
|       |    |    |     |       |       |       |      |      |                           | SOM GT:/0:21 0/1:20,5:34G      | A |
|       |    |    |     |       |       |       |      |      |                           | SOM GT:/0:69 0/1:48,5:34C      | G |
|       |    |    |     |       |       |       |      |      |                           | SOM GT:/0:24 0/1:43,4:37A      | T |
|       |    |    |     |       |       |       |      |      |                           | SOM GT:/0:25 0/1:37,3:37T      | C |
|       |    |    |     |       |       |       |      |      | 0                         | 0 SOM GT:/0:10 0/1:24,5:34T    | C |
| 0.359 |    |    |     |       |       |       |      |      | 0.1                       | 0.4 SOM GT:/0:8,(0/1:2,3:37: C | T |
|       |    |    |     |       |       |       |      |      |                           | SOM GT:/0:34 0/1:12,3:2G       | A |
|       |    |    |     |       |       |       |      |      | 0                         | SOM GT:/0:20 0/1:31,6:37G      | C |
|       | ## | 0  |     |       |       |       | 2.1  |      | 0                         | SOM GT:/0:11 0/1:164,6:G       | C |
|       |    |    |     |       |       |       |      |      | 0                         | SOM GT:/0:12 0/1:35,10:1A      | C |
|       |    |    | 0.1 |       | 0.51  | 2.6   |      |      |                           | SOM GT:/0:68 0/1:104,26 G      | T |
|       |    |    |     |       |       |       |      |      | 0                         | 0 SOM GT:/0:13 0/1:32,4:37A    | G |
|       | ## | 0  | 0   |       |       |       |      |      |                           | SOM GT:/0:14 0/1:191,49 G      | A |
| 2E-04 | ## | 0  | 0.0 | 0.73E | 0.974 | 0.77  | 4.5  | 4.43 |                           | SOM GT:/0:75 0/1:164,8:G       | A |
|       |    |    | 0.4 | 0.044 | 0.014 | 1,D   | 5.9  | 2.69 |                           | SOM GT:/0:59 0/1:113,7:G       | C |
|       |    |    |     |       |       |       | 3.9  |      |                           | SOM GT:/0:48 0/1:81,16:G       | T |
|       |    |    |     |       |       |       |      |      |                           | SOM GT:/0:41 0/1:68,16:G       | T |
|       |    |    |     |       |       |       |      |      |                           | SOM GT:/0:64 0/1:93,21:G       | C |
|       |    |    |     |       |       |       |      |      | 0                         | 0 SOM GT:/0:9,(0/1:19,3:37G    | T |
|       |    |    |     |       |       |       |      |      |                           | SOM GT:/0:48 0/1:84,8:37G      | A |
|       |    |    |     |       |       |       |      |      |                           | SOM GT:/0:16 0/1:16,3:37C      | T |
|       |    |    |     |       |       |       |      |      |                           | SOM GT:/0:60 0/1:66,15:G       | A |
|       |    |    |     |       |       |       |      |      |                           | SOM GT:/0:36 0/1:41,3:37A      | G |
|       |    |    |     |       |       |       |      |      |                           | SOM GT:/0:19 0/1:20,5:37G      | A |
|       |    | 0  | 0   | 0.0   | 0.781 | 0.982 | 1,D  | 5.8  | 3.58                      | SOM GT:/0:36 0/1:50,15:G       | T |
|       |    |    |     | 0.3   | 0.42, | 0.961 | 1,N  | 4.9  | 3.65                      | SOM GT:/0:11 0/1:181,7:G       | A |
|       | 0  | ## | 0   | 0.1   | 0.021 | 0.17E | 0.99 | 3.2  |                           | SOM GT:/0:51 0/1:76,24:G       | A |
|       |    |    |     |       |       |       |      |      |                           | SOM GT:/0:29 0/1:37,11:G       | T |
|       |    |    |     |       |       |       | 2.8  |      |                           | SOM GT:/0:35 0/1:51,18:G       | A |
|       |    |    |     |       |       |       |      |      |                           | SOM GT:/0:39 0/1:54,4:37T      | A |
|       |    |    |     |       |       |       |      |      | 0                         | 0 SOM GT:/0:38 0/1:53,9:37G    | A |
|       |    |    |     |       |       |       |      |      |                           | SOM GT:/0:15 0/1:26,7:37G      | A |
|       |    |    |     |       |       |       |      |      |                           | SOM GT:/0:11 0/1:10,3:2E       | A |
|       |    |    |     |       |       |       |      |      |                           | SOM GT:/0:31 0/1:56,16:G       | C |
|       |    |    |     |       |       |       |      |      |                           | SOM GT:/0:85 0/1:127,28 G      | A |
|       |    |    |     | 0.1   | 0.721 | 0.972 | 1.00 | 2.2  | 3.43                      | SOM GT:/0:32 0/1:52,18:G       | T |
|       |    |    |     |       |       |       |      |      |                           | SOM GT:/0:25 0/1:22,7:3E       | A |
|       |    |    |     | 0.1   | 0.98E | 0.991 | 1,D  | 4.8  | 2.47                      | SOM GT:/0:56 0/1:73,25:G       | C |
|       |    |    |     |       |       |       |      |      |                           | SOM GT:/0:12 0/1:22,7:37G      | C |

|   |   |    |    |     |       |       |       |      |                            |                            |                               |   |
|---|---|----|----|-----|-------|-------|-------|------|----------------------------|----------------------------|-------------------------------|---|
| . | . | .  | .  | .   | .     | .     | .     | .    | SOM GT:/0:25 0/1:50,13:3 G | A                          |                               |   |
| . | . | .  | .  | .   | .     | .     | .     | .    | SOM GT:/0:26 0/1:31,8:37 C | T                          |                               |   |
| . | . | ## | 0  | 0.1 | 0.015 | 0.008 | 0.99  | 2.58 | SOM GT:/0:17 0/1:30,6:37 C | T                          |                               |   |
| . | . | .  | .  | 0.8 | 0.004 | 0.025 | 1,N   | .    | SOM GT:/0:46 0/1:93,4:37 C | T                          |                               |   |
| . | . | .  | .  | .   | .     | 1,A   | 5.9   | 8.08 | SOM GT:/0:46 0/1:61,9:37 G | C                          |                               |   |
| . | . | .  | .  | .   | .     | .     | .     | 0    | 0.1                        | SOM GT:/0:10 0/1:14,5:37 T | C                             |   |
| . | . | .  | .  | .   | .     | .     | .     | .    | .                          | SOM GT:/0:40 0/1:72,7:37 C | G                             |   |
| . | . | .  | .  | .   | .     | .     | .     | .    | .                          | SOM GT:/0:26 0/1:30,3:37 G | C                             |   |
| . | . | .  | .  | .   | .     | .     | .     | .    | .                          | SOM GT:/0:9,(0/1:12,5:37 G | A                             |   |
| . | . | .  | .  | .   | .     | .     | 2.4   | .    | .                          | SOM GT:/0:11 0/1:21,9:37 C | G                             |   |
| . | . | .  | .  | .   | .     | .     | .     | .    | .                          | SOM GT:/0:16 0/1:23,6:35 C | G                             |   |
| . | . | .  | .  | .   | .     | .     | .     | .    | .                          | SOM GT:/0:54 0/1:95,30:3 T | G                             |   |
| . | . | .  | .  | 0.0 | 0.396 | 0.673 | 0.57  | 6    | 2.71                       | SOM GT:/0:22 0/1:48,11:3 G | C                             |   |
| . | . | .  | .  | .   | .     | .     | .     | 3    | 1.95                       | SOM GT:/0:20 0/1:36,11:3 C | T                             |   |
| . | . | .  | .  | .   | .     | .     | .     | 5.1  | 1.57                       | SOM GT:/0:65 0/1:110,32 C  | T                             |   |
| . | . | .  | .  | .   | .     | .     | .     | 3    | 1.29                       | SOM GT:/0:98 0/1:123,30 G  | A                             |   |
| . | . | .  | .  | .   | .     | .     | .     | .    | .                          | SOM GT:/0:17 0/1:230,62 G  | A                             |   |
| . | . | ## | 0  | .   | .     | .     | .     | 2.08 | .                          | SOM GT:/0:30 0/1:39,5:34 C | T                             |   |
| . | . | .  | .  | .   | .     | .     | .     | .    | .                          | SOM GT:/0:24 0/1:60,4:37 C | A                             |   |
| . | . | .  | .  | .   | .     | .     | .     | .    | .                          | SOM GT:/0:20 0/1:37,3:37 G | T                             |   |
| . | . | .  | .  | .   | .     | .     | .     | .    | .                          | SOM GT:/0:24 0/1:40,12:3 C | T                             |   |
| . | . | .  | .  | .   | .     | .     | .     | .    | .                          | SOM GT:/0:78 0/1:105,20 C  | T                             |   |
| . | . | .  | .  | .   | .     | 1,A   | 5.2   | 10.2 | .                          | SOM GT:/0:32 0/1:54,19:3 C | A                             |   |
| . | . | 0  | 0  | .   | .     | .     | .     | .    | 0                          | 0                          | DB;SOM GT:/0:45 0/1:86,10:3 T | C |
| . | . | .  | .  | .   | .     | .     | .     | .    | .                          | .                          | SOM GT:/0:16 0/1:16,7:22 T    | G |
| . | . | .  | .  | .   | .     | .     | .     | .    | .                          | .                          | SOM GT:/0:15 0/1:16,7:25 T    | G |
| . | . | .  | .  | .   | .     | .     | 2     | .    | .                          | .                          | SOM GT:/0:29 0/1:29,5:34 G    | T |
| . | . | ## | ## | 0   | .     | .     | .     | .    | .                          | .                          | SOM GT:/0:72 0/1:118,34 G     | A |
| . | . | .  | .  | .   | .     | .     | 2.53  | .    | .                          | .                          | SOM GT:/0:14 0/1:23,6:32 G    | A |
| . | . | .  | .  | .   | .     | .     | .     | .    | .                          | .                          | SOM GT:/0:48 0/1:77,15:3 G    | C |
| . | . | ## | 0  | 0.0 | 0.542 | 0.996 | 1.00  | 4.8  | 4.62                       | .                          | SOM GT:/0:11 0/1:165,36 G     | A |
| . | . | ## | 0  | .   | .     | .     | .     | 4.3  | 2.58                       | .                          | SOM GT:/0:68 0/1:123,20 G     | A |
| . | . | .  | .  | .   | .     | .     | .     | .    | .                          | 0                          | SOM GT:/0:8,(0/1:16,3:37 C    | T |
| . | . | .  | .  | .   | .     | .     | .     | .    | .                          | 0                          | SOM GT:/0:8,(0/1:15,4:37 A    | G |
| . | . | .  | .  | .   | .     | .     | .     | .    | .                          | .                          | SOM GT:/0:12 0/1:20,3:37 C    | G |
| . | . | .  | .  | .   | .     | .     | .     | 1.39 | .                          | .                          | SOM GT:/0:11 0/1:19,5:37 G    | A |
| . | . | .  | .  | .   | .     | .     | .     | .    | .                          | .                          | SOM GT:/0:24 0/1:18,9:35 G    | A |
| . | . | .  | .  | .   | .     | .     | .     | .    | 0.1                        | 0.1                        | SOM GT:/0:21 0/1:36,3:37 A    | G |
| . | . | .  | .  | .   | .     | .     | .     | .    | .                          | .                          | SOM GT:/0:93 0/1:128,45 G     | A |
| . | . | .  | .  | .   | .     | .     | .     | .    | .                          | .                          | SOM GT:/0:26 0/1:47,4:37 C    | G |
| . | . | .  | .  | 0.0 | 0.991 | 1.0,D | 1,D   | 5    | 4.63                       | .                          | SOM GT:/0:28 0/1:54,12:3 G    | A |
| . | . | .  | .  | .   | .     | 1,A   | 4.6   | 3.58 | .                          | .                          | SOM GT:/0:71 0/1:118,32 C     | T |
| . | . | .  | .  | 0.0 | 0.154 | 0.463 | .     | 2.3  | 4.08                       | .                          | SOM GT:/0:22 0/1:42,3:37 C    | T |
| . | . | .  | .  | 0.0 | 0.684 | 0.933 | 1,D   | 4.2  | 3.80                       | .                          | SOM GT:/0:77 0/1:122,13 A     | G |
| . | . | .  | .  | .   | .     | .     | 2.2   | .    | .                          | .                          | SOM GT:/0:65 0/1:99,21:3 G    | T |
| . | . | .  | .  | .   | .     | .     | .     | .    | .                          | .                          | SOM GT:/0:11 0/1:20,14:3 C    | A |
| . | . | ## | 0  | 0.6 | 0.996 | 1.0,D | 0.83  | 4    | 3.94                       | .                          | SOM GT:/0:77 0/1:125,26 C     | T |
| . | . | .  | .  | .   | .     | .     | 2.32  | .    | .                          | .                          | SOM GT:/0:43 0/1:96,17:1 T    | G |
| . | . | .  | .  | .   | .     | .     | .     | .    | .                          | .                          | SOM GT:/0:29 0/1:39,8:37 C    | T |
| . | . | 0  | ## | 0   | 0.9   | 0.001 | 0.016 | 0.98 | 3.8                        | .                          | SOM GT:/0:53 0/1:87,21:3 C    | T |
| . | . | .  | .  | .   | .     | .     | 1.36  | .    | .                          | .                          | SOM GT:/0:22 0/1:25,12:3 C    | G |
| . | . | .  | .  | 0.0 | 0.962 | 0.999 | 1,D   | 3.1  | 2.73                       | .                          | SOM GT:/0:14 0/1:238,53 C     | G |
| . | . | .  | .  | .   | .     | .     | 3     | 1.80 | .                          | .                          | SOM GT:/0:94 0/1:135,45 G     | T |
| . | . | .  | .  | 0.0 | 0.425 | 0.697 | 1,D   | 4    | 4.83                       | .                          | SOM GT:/0:33 0/1:46,13:3 G    | A |



|       |  |    |   |     |      |        |         |               |                                   |   |
|-------|--|----|---|-----|------|--------|---------|---------------|-----------------------------------|---|
|       |  |    |   |     | 2.3  |        |         |               | SOMGT:/0:24 0/1:40,12:3G          | A |
|       |  |    |   |     |      |        |         |               | SOMGT:/0:51 0/1:84,21:3C          | T |
|       |  | ## | 0 |     |      |        |         |               | SOMGT:/0:93 0/1:196,11 C          | T |
|       |  |    |   | 0.6 | 0.01 | 10.017 | 0.92    | 5.6 1.76      | SOMGT:/0:28 0/1:55,5:37C          | G |
|       |  |    |   |     |      |        |         | 3.4 3.20      | SOMGT:/0:11 0/1:19,5:37G          | A |
|       |  |    |   |     |      |        |         | 0 0           | SOMGT:/0:82 0/1:125,7:3T          | C |
|       |  |    |   |     |      |        |         | 0 0           | SOMGT:/0:89 0/1:129,7:3C          | T |
|       |  |    |   |     |      |        |         | 0 0           | SOMGT:/0:15 0/1:38,3:33C          | T |
|       |  |    |   | 0.3 | 0.98 | 1.0    | D 1,D   | 6.2 5.79      | SOMGT:/0:35 0/1:48,18:3C          | T |
|       |  |    |   |     |      |        |         | 2.83          | SOMGT:/0:79 0/1:117,32 C          | G |
|       |  |    |   |     |      |        |         |               | SOMGT:/0:47 0/1:66,16:3C          | T |
|       |  |    |   |     |      |        |         | 2.7 1.91      | SOMGT:/0:65 0/1:86,17:3C          | T |
| 0.104 |  | ## | 0 | 0.0 | 0.99 | 1.0    | D 1,D   | 4 3.20        | SOMGT:/0:9,(0/1:17,3:33G          | A |
|       |  |    |   | 0.0 | 0.13 | 0.347  | 1,N     | 2.37          | SOMGT:/0:37 0/1:56,15:3G          | A |
|       |  |    |   |     |      |        |         |               | SOMGT:/0:17 0/1:23,16:3G          | C |
|       |  |    |   | 0.0 | 0.59 | 1.0    | 96,1,N  | 3.9           | SOMGT:/0:38 0/1:94,5:37C          | G |
|       |  |    |   | 0.3 | 0.00 | 0.002  | 1,N     | 4.3           | SOMGT:/0:15 0/1:227,60 C          | T |
|       |  |    |   |     |      |        |         | 3.2           | SOMGT:/0:15 0/1:47,13:3C          | G |
|       |  |    |   |     |      |        |         |               | SOMGT:/0:8,(0/1:19,4:37G          | A |
|       |  |    |   |     |      |        |         |               | SOMGT:/0:12 0/1:20,8:37C          | T |
|       |  |    |   |     |      |        |         | 2.04          | SOMGT:/0:18 0/1:29,12:3C          | T |
|       |  |    |   |     |      |        |         |               | SOMGT:/0:24 0/1:42,4:27T          | G |
|       |  |    |   | 0.0 |      |        | 1,N     |               | SOMGT:/0:36 0/1:81,6:37C          | A |
|       |  |    |   | 0.0 | 0.99 | 1.0    | D 1,D   | 6 4.89        | SOMGT:/0:45 0/1:97,29:3G          | C |
|       |  |    |   |     |      |        |         |               | SOMGT:/0:10 0/1:6,2:37: C         | T |
|       |  |    |   |     |      |        |         |               | SOMGT:/0:43 0/1:76,21:3C          | T |
|       |  |    |   |     |      |        |         |               | SOMGT:/0:21 0/1:15,7:37G          | A |
|       |  | ## | 0 |     |      |        |         |               | SOMGT:/0:47 0/1:91,6:30G          | A |
|       |  |    |   |     |      |        |         |               | SOMGT:/0:37 0/1:66,17:3G          | A |
|       |  |    |   |     |      |        |         |               | SOMGT:/0:45 0/1:51,10:3C          | G |
|       |  |    |   |     |      |        |         | 2.7 2.30      | SOMGT:/0:15 0/1:17,5:37A          | C |
|       |  |    |   | 0.0 | 0.99 | 1.0    | 99,1.00 | 5.2 4.92      | SOMGT:/0:25 0/1:36,8:37G          | C |
|       |  |    |   |     |      |        |         | 1.00 3.6 1.82 | SOMGT:/0:65 0/1:103,28 G          | C |
|       |  |    |   |     |      |        |         |               | SOMGT:/0:32 0/1:31,3:37C          | A |
|       |  |    |   | 0   | 0    |        |         | 5.1 1.83      | SOMGT:/0:99 0/1:145,51 G          | T |
|       |  |    |   |     |      |        |         |               | 0 0.3 SOMGT:/0:8,(0/1:7,4:37: C   | T |
|       |  |    |   |     |      |        |         |               | SOMGT:/0:16 0/1:19,4:24A          | C |
|       |  |    |   |     |      |        |         | 2.2           | SOMGT:/0:53 0/1:87,16:3G          | A |
|       |  |    |   |     |      |        |         |               | SOMGT:/0:16 0/1:20,5:37G          | A |
|       |  |    |   |     |      |        |         |               | SOMGT:/0:16 0/1:28,5:37C          | T |
|       |  |    |   |     |      |        |         |               | SOMGT:/0:9,(0/1:19,5:37G          | C |
| 2E-04 |  | 0  | 0 | 0   |      |        |         |               | SOMGT:/0:14 0/1:47,11:3C          | T |
|       |  |    |   |     |      |        |         |               | SOMGT:/0:23 0/1:45,3:37C          | A |
|       |  |    |   |     |      |        |         |               | SOMGT:/0:22 0/1:47,9:37C          | A |
|       |  |    |   |     |      |        |         |               | SOMGT:/0:41 0/1:75,18:3C          | A |
|       |  |    |   | 0.0 | 0.57 | 0.99   | 4.066   | 4.2 3.13      | SOMGT:/0:53 0/1:96,4:37G          | A |
|       |  |    |   |     |      |        |         |               | SOMGT:/0:14 0/1:233,12 C          | T |
|       |  |    |   |     |      |        |         |               | SOMGT:/0:39 0/1:44,15:3G          | A |
|       |  |    |   |     |      |        |         |               | SOMGT:/0:37 0/1:59,9:37G          | C |
|       |  |    |   |     |      |        |         |               | 0 SOMGT:/0:67 0/1:93,19:3G        | A |
|       |  | ## |   |     |      |        |         | 1.75          | SOMGT:/0:53 0/1:69,14:3G          | A |
|       |  |    |   |     |      |        |         |               | 0 0 SOMGT:/0:14 0/1:33,7:20T      | G |
| 2E-04 |  |    |   |     |      |        |         |               | SOMGT:/0:58 0/1:61,27:3G          | A |
|       |  |    |   |     |      |        |         |               | 0 0.1 DB;SOMGT:/0:31 0/1:61,4:37G | A |

|       |    |   |     |       |       |      |      |      |   |                             |   |
|-------|----|---|-----|-------|-------|------|------|------|---|-----------------------------|---|
|       |    |   |     |       |       |      |      |      |   | SOM GT:/0:20 0/1:33,3:37 C  | T |
|       |    |   |     |       |       |      |      |      |   | SOM GT:/0:9,(0/1:32,13:3 C  | A |
| 2E-04 | ## | 0 |     |       |       | 4.2  | 1.36 |      |   | SOM GT:/0:13 0/1:261,42 C   | T |
|       |    |   |     |       |       |      |      |      |   | SOM GT:/0:13 0/1:16,6:15 T  | G |
|       |    |   |     |       |       | 1.97 |      |      |   | SOM GT:/0:24 0/1:44,5:21 T  | G |
|       |    |   |     |       |       |      |      |      |   | SOM GT:/0:48 0/1:80,4:37 T  | C |
|       |    |   |     |       |       |      |      | 0    | 0 | SOM GT:/0:60 0/1:171,8:3 C  | A |
|       |    |   |     |       |       | 1.94 |      |      |   | SOM GT:/0:87 0/1:112,28 C   | T |
|       |    |   |     |       |       | 3.36 |      |      |   | SOM GT:/0:41 0/1:91,33:3 C  | T |
|       |    |   | 0.0 | 0.973 | 1.0,D | 1,D  | 5.8  | 4.85 |   | SOM GT:/0:76 0/1:101,26 C   | G |
|       | ## | 0 |     |       |       |      |      |      |   | SOM GT:/0:77 0/1:114,39 G   | A |
|       |    |   |     |       |       |      |      |      |   | SOM GT:/0:16 0/1:27,5:37 G  | T |
| 2E-04 |    |   |     |       |       |      |      |      |   | SOM GT:/0:29 0/1:78,16:3 C  | T |
|       |    |   |     |       |       |      |      |      |   | SOM GT:/0:33 0/1:59,14:3 C  | T |
| 0.324 |    |   |     |       |       |      |      | 0    | 0 | SOM GT:/0:9,(0/1:19,3:37 G  | A |
|       |    |   |     |       |       |      |      |      |   | SOM GT:/0:16 0/1:34,7:37 G  | A |
|       |    |   |     |       |       | 3    | 1.84 |      |   | SOM GT:/0:23 0/1:31,3:37 G  | A |
|       |    |   |     |       |       |      |      |      |   | SOM GT:/0:23 0/1:33,3:37 C  | T |
| 4E-04 |    |   |     |       |       |      |      | 0    |   | SOM GT:/0:56 0/1:147,25 C   | T |
|       |    |   |     |       |       |      |      |      |   | SOM GT:/0:52 0/1:89,12:3 C  | A |
|       |    |   |     |       |       |      |      |      |   | SOM GT:/0:22 0/1:35,6:37 G  | C |
|       |    |   |     |       |       |      |      |      |   | SOM GT:/0:29 0/1:57,4:37 G  | A |
|       |    |   |     |       |       |      |      |      |   | SOM GT:/0:11 0/1:20,7:37 C  | T |
|       |    |   | 0.0 | 0.996 | 0.999 | 1,D  | 4    | 4.10 |   | SOM GT:/0:97 0/1:254,8:3 C  | T |
|       |    |   | 0.0 | 0.037 | 0.214 | 1,N  |      |      |   | SOM GT:/0:98 0/1:165,29 C   | G |
|       |    |   |     |       |       |      |      | 0    | 0 | DB;S GT:/0:22 0/1:35,4:34 T | C |
|       |    |   |     |       |       |      |      |      |   | SOM GT:/0:27 0/1:85,12:3 C  | T |
|       |    |   | 0.2 | 0.146 | 0.587 | 1,D  | 5.5  | 2.88 |   | SOM GT:/0:55 0/1:115,22 C   | G |
|       |    |   |     |       |       |      |      |      |   | SOM GT:/0:10 0/1:22,4:37 C  | G |
|       |    |   |     |       |       |      |      | 0    |   | SOM GT:/0:14 0/1:38,6:37 C  | T |
|       | ## | 0 | 0.8 | 0.005 | 0.102 | 1,N  |      | 0    |   | SOM GT:/0:31 0/1:65,12:3 C  | T |
|       | ## | 0 |     | 0.978 | 0.999 | 1,D  | 5.7  | 3.83 |   | SOM GT:/0:89 0/1:144,35 G   | A |
|       |    |   |     |       |       |      |      |      |   | SOM GT:/0:28 0/1:51,15:3 C  | T |
|       |    |   |     |       |       |      |      |      |   | SOM GT:/0:44 0/1:58,10:3 G  | A |
|       |    |   |     |       |       | 1,A  | 5.1  | 5.03 |   | SOM GT:/0:67 0/1:88,6:37 G  | A |
|       |    |   | 0.0 | 0.213 | 0.759 | 0.67 | 4.4  | 4.04 |   | SOM GT:/0:57 0/1:120,7:3 C  | T |
|       |    |   |     |       |       |      |      |      |   | SOM GT:/0:21 0/1:24,13:3 G  | A |
| 0.021 |    |   |     |       |       |      |      | 0    |   | SOM GT:/0:11 0/1:14,6:35 C  | T |
| 0.04  | ## | 0 |     |       |       |      |      | 0    | 0 | SOM GT:/0:10 0/1:6,2:37 T   | C |
|       | ## | 0 | 0.1 | 0.968 | 0.997 | 1.00 | 5.9  | 4.60 |   | SOM GT:/0:46 0/1:83,22:3 C  | T |
|       |    |   |     |       |       |      |      |      |   | SOM GT:/0:45 0/1:65,22:3 G  | A |
|       |    |   |     |       |       |      |      |      |   | SOM GT:/0:8,(0/1:23,6:37 C  | T |
|       |    |   |     |       |       |      |      |      |   | SOM GT:/0:62 0/1:104,26 A   | G |
|       |    |   | 0.1 | 0.974 | 0.999 | 1,D  | 5.8  | 5.29 |   | SOM GT:/0:72 0/1:119,25 C   | G |
|       |    |   |     |       |       |      |      |      |   | SOM GT:/0:10 0/1:26,6:37 G  | A |
|       |    |   |     |       |       |      |      |      |   | SOM GT:/0:65 0/1:101,21 G   | A |
|       |    |   |     |       |       |      |      |      |   | SOM GT:/0:89 0/1:114,76 T   | A |
|       |    |   |     |       |       |      | 2.1  |      |   | SOM GT:/0:12 0/1:14,6:37 C  | T |
|       |    |   |     |       |       |      |      | 0    |   | DB;S GT:/0:32 0/1:60,6:37 A | C |
|       | ## | 0 |     |       |       |      |      |      |   | SOM GT:/0:11 0/1:28,4:34 C  | G |
|       |    |   | 0.0 | 0.928 | 0.993 | 1,D  | 5.9  | 5.60 |   | SOM GT:/0:67 0/1:96,27:3 C  | T |
|       |    |   | 0.0 | 0.996 | 0.999 | 1,D  | 5    | 4.69 |   | SOM GT:/0:88 0/1:156,47 C   | G |
|       |    |   |     |       |       |      | 2.8  | 2.61 |   | SOM GT:/0:10 0/1:17,9:37 T  | A |
|       |    |   |     |       |       |      |      | 0.1  |   | SOM GT:/0:22 0/1:31,6:37 A  | G |

|       |   |    |     |       |       |      |     |      |      |                            |                            |   |
|-------|---|----|-----|-------|-------|------|-----|------|------|----------------------------|----------------------------|---|
|       |   |    |     |       |       |      |     |      |      | SOM GT:/0:27 0/1:47,7:37 G | A                          |   |
|       |   |    |     |       |       |      |     |      |      | SOM GT:/0:13 0/1:20,3:37 C | T                          |   |
|       |   | ## | 0   |       |       |      |     |      |      | SOM GT:/0:12 0/1:204,59 C  | T                          |   |
|       |   |    |     |       |       |      |     |      |      | SOM GT:/0:45 0/1:99,6:37 C | T                          |   |
|       |   |    | 0.0 | 0.098 | 0.332 | 0.91 |     | 2.91 |      | SOM GT:/0:42 0/1:58,14:3 C | G                          |   |
|       |   |    |     |       |       |      |     | 4.3  |      | SOM GT:/0:30 0/1:56,4:37 C | T                          |   |
|       |   |    | 0.0 | 0.992 | 0.996 | 1.00 | 3.9 | 4.25 |      | SOM GT:/0:52 0/1:88,17:3 A | G                          |   |
|       |   |    | 0.7 | 0.106 | 0.652 | 1,N  |     |      |      | SOM GT:/0:23 0/1:41,13:3 G | C                          |   |
| 2E-04 |   |    |     |       |       |      |     |      |      | SOM GT:/0:23 0/1:42,17:3 G | A                          |   |
|       |   |    |     |       |       |      |     |      |      | SOM GT:/0:53 0/1:60,23:3 C | G                          |   |
|       |   |    |     |       |       |      |     |      |      | SOM GT:/0:70 0/1:104,27 G  | C                          |   |
|       |   |    |     |       |       |      |     |      |      | SOM GT:/0:34 0/1:62,11:3 C | T                          |   |
|       |   |    |     |       |       |      |     |      |      | SOM GT:/0:13 0/1:228,26 G  | A                          |   |
|       |   |    |     |       |       |      |     | 0    |      | SOM GT:/0:35 0/1:59,4:37 G | A                          |   |
|       |   |    |     |       |       |      |     |      |      | SOM GT:/0:26 0/1:33,8:35 C | T                          |   |
|       |   |    |     |       |       |      |     | 2.06 |      | SOM GT:/0:70 0/1:142,26 G  | C                          |   |
|       |   |    |     |       |       |      |     | 4.3  | 2.33 | SOM GT:/0:10 0/1:19,5:37 G | A                          |   |
|       |   |    | 0.0 | 0.634 | 0.991 | 1,D  | 4.8 | 2.26 |      | SOM GT:/0:24 0/1:34,6:37 C | G                          |   |
|       |   |    |     |       |       |      |     | 4.7  |      | SOM GT:/0:17 0/1:28,5:34 C | A                          |   |
|       |   |    |     |       |       |      |     |      |      | SOM GT:/0:13 0/1:33,4:37 G | C                          |   |
|       |   |    |     |       |       |      |     |      |      | SOM GT:/0:16 0/1:25,4:37 G | T                          |   |
|       |   |    |     |       |       |      |     |      |      | SOM GT:/0:49 0/1:59,7:37 C | T                          |   |
|       |   |    |     |       |       |      |     | 1.26 |      | SOM GT:/0:10 0/1:142,43 G  | A                          |   |
|       |   |    |     |       |       |      |     | 4.3  | 3.84 | SOM GT:/0:27 0/1:40,8:37 G | C                          |   |
|       |   |    |     |       |       |      |     | 3.4  | 2.30 | SOM GT:/0:50 0/1:72,21:3 G | A                          |   |
|       |   |    |     |       |       |      |     |      | 0    | SOM GT:/0:15 0/1:35,4:30 C | A                          |   |
|       |   |    | 0.0 | 0.219 | 0.412 | 1,D  | 5.4 | 2.54 |      | SOM GT:/0:73 0/1:136,8:3 G | C                          |   |
|       |   |    |     |       |       |      |     | 2    |      | SOM GT:/0:33 0/1:76,14:3 C | T                          |   |
|       |   |    |     |       |       |      |     | 2.3  |      | SOM GT:/0:24 0/1:37,10:3 G | A                          |   |
|       |   |    |     |       |       |      |     |      |      | SOM GT:/0:36 0/1:57,14:3 C | T                          |   |
|       |   |    |     |       |       |      |     | 1.24 |      | SOM GT:/0:45 0/1:87,26:3 C | T                          |   |
|       |   |    |     |       |       |      |     |      |      | SOM GT:/0:33 0/1:46,17:3 C | T                          |   |
|       |   |    |     |       |       |      |     | 4.4  | 1.99 | SOM GT:/0:17 0/1:338,10 C  | G                          |   |
|       |   |    | 0.0 | 0.003 | 0.012 | 0.99 | 6   | 2.11 |      | SOM GT:/0:24 0/1:34,5:37 G | C                          |   |
|       |   |    | 0.0 | 0.013 | 0.029 | 0.98 | 3.9 | 1.98 |      | SOM GT:/0:24 0/1:35,5:34 G | T                          |   |
|       |   |    |     |       |       |      |     |      |      | SOM GT:/0:36 0/1:37,9:17 T | G                          |   |
|       |   |    |     |       |       |      |     |      |      | SOM GT:/0:11 0/1:178,27 G  | C                          |   |
| 1E-03 | 0 | 0  | 0   |       |       |      |     | 2.4  |      | SOM GT:/0:49 0/1:99,27:3 C | T                          |   |
|       |   |    |     |       |       |      |     | 5.3  | 1.40 | SOM GT:/0:11 0/1:151,47 C  | T                          |   |
|       |   |    |     |       |       |      |     |      | 0.1  | 0                          | SOM GT:/0:8,(0/1:15,3:37 A | G |
|       |   |    |     |       |       |      |     |      |      |                            | SOM GT:/0:19 0/1:30,6:37 G | C |
|       |   |    |     |       |       |      |     |      |      |                            | SOM GT:/0:11 0/1:212,8:3 G | A |
|       |   |    | 0.0 | 0.096 | 0.053 | 0.86 | 3.3 | 2.65 |      | SOM GT:/0:42 0/1:73,17:3 C | G                          |   |
|       |   |    |     |       |       |      |     | 2.3  |      | SOM GT:/0:14 0/1:32,4:37 G | C                          |   |
|       |   |    | 0.0 |       |       | 1,D  | 5.1 | 4.06 |      | SOM GT:/0:30 0/1:62,12:3 C | G                          |   |
|       |   |    | 1.0 | 0.002 | 0.001 | 1,D  |     |      |      | SOM GT:/0:37 0/1:61,12:3 G | A                          |   |
|       |   |    |     |       |       |      |     |      | 0    | 0                          | SOM GT:/0:20 0/1:39,3:37 C | T |
|       |   |    |     |       |       |      |     |      |      |                            | SOM GT:/0:11 0/1:14,3:29 G | T |
|       |   |    | 0.0 |       |       | 1,D  | 3.8 | 3.39 |      | SOM GT:/0:85 0/1:150,27 C  | T                          |   |
|       |   |    |     |       |       |      |     | 2.3  |      | SOM GT:/0:11 0/1:12,5:37 G | A                          |   |
|       |   |    |     |       |       |      |     |      |      |                            | SOM GT:/0:13 0/1:38,3:37 C | T |
|       |   |    |     |       |       |      |     |      |      |                            | SOM GT:/0:34 0/1:50,7:37 C | T |
|       |   |    |     |       |       |      |     | 3.6  |      | SOM GT:/0:38 0/1:67,19:3 G | A                          |   |
|       |   |    |     |       |       |      |     |      |      |                            | SOM GT:/0:29 0/1:44,11:3 A | G |

|       |   |   |   |  |  |     |                       |                    |                            |                            |                            |   |
|-------|---|---|---|--|--|-----|-----------------------|--------------------|----------------------------|----------------------------|----------------------------|---|
|       |   |   |   |  |  |     |                       |                    | SOM GT:/0:18 0/1:28,5:37 C | T                          |                            |   |
|       |   |   |   |  |  |     |                       |                    | SOM GT:/0:59 0/1:83,22:3 G | A                          |                            |   |
|       |   |   |   |  |  |     |                       |                    | SOM GT:/0:12 0/1:16,11:3 G | C                          |                            |   |
|       |   |   |   |  |  |     |                       |                    | SOM GT:/0:38 0/1:71,19:3 G | T                          |                            |   |
| 6E-04 | 0 | 0 | 0 |  |  |     |                       |                    | SOM GT:/0:50 0/1:70,17:3 G | A                          |                            |   |
| 0.023 |   |   |   |  |  |     |                       | 0 0.1              | SOM GT:/0:9,(0/1:10,3:37 A | T                          |                            |   |
|       |   |   |   |  |  | 1,A | 5.18.                 |                    | SOM GT:/0:58 0/1:109,5:3 G | T                          |                            |   |
|       |   |   |   |  |  |     |                       |                    | SOM GT:/0:36 0/1:66,5:37 G | A                          |                            |   |
|       |   |   |   |  |  |     | 1.54.                 |                    | SOM GT:/0:13 0/1:22,8:37 C | T                          |                            |   |
|       |   |   |   |  |  |     |                       |                    | SOM GT:/0:13 0/1:25,8:37 G | C                          |                            |   |
|       |   |   |   |  |  |     |                       |                    | SOM GT:/0:8,(0/1:10,3:28 G | A                          |                            |   |
|       |   |   |   |  |  |     |                       |                    | SOM GT:/0:69 0/1:104,27 T  | A                          |                            |   |
|       |   |   |   |  |  |     |                       |                    | SOM GT:/0:9,(0/1:5,2:37: A | G                          |                            |   |
|       |   |   |   |  |  |     |                       |                    | SOM GT:/0:13 0/1:20,3:37 G | C                          |                            |   |
|       |   |   |   |  |  |     |                       |                    | SOM GT:/0:39 0/1:65,22:3 C | G                          |                            |   |
|       |   |   |   |  |  | 1,A | 2.1 49.9.             |                    | SOM GT:/0:95 0/1:157,29 G  | T                          |                            |   |
|       |   |   |   |  |  | 0.0 | 0.206 0.376 1,N       |                    | SOM GT:/0:89 0/1:154,26 G  | A                          |                            |   |
|       |   |   |   |  |  |     |                       |                    | SOM GT:/0:62 0/1:86,35:3 G | A                          |                            |   |
|       |   |   |   |  |  | ##  | 0 0.0,0.609 0.7,P 1,N | 1.70.              | SOM GT:/0:10 0/1:167,42 G  | A                          |                            |   |
|       |   |   |   |  |  |     |                       |                    | SOM GT:/0:57 0/1:81,17:3 C | T                          |                            |   |
|       |   |   |   |  |  |     | 0.0                   | 0.999 1.0,D 0.82.  | 2.14.                      | SOM GT:/0:89 0/1:163,39 G  | C                          |   |
|       |   |   |   |  |  |     |                       |                    | 2.25.                      | SOM GT:/0:90 0/1:147,42 G  | A                          |   |
|       |   |   |   |  |  |     |                       |                    | 1.68.                      | SOM GT:/0:71 0/1:82,29:3 G | T                          |   |
|       |   |   |   |  |  |     | 0.1                   | 0.682 0.958 1,N    |                            | SOM GT:/0:31 0/1:70,15:3 C | G                          |   |
|       |   |   |   |  |  | 0   | 0 0.1                 | 0.006 0.013 1,N    |                            | SOM GT:/0:44 0/1:97,15:3 G | A                          |   |
|       |   |   |   |  |  |     |                       |                    |                            | SOM GT:/0:9,(0/1:9,3:37: G | A                          |   |
|       |   |   |   |  |  |     |                       |                    |                            | SOM GT:/0:97 0/1:154,44 A  | T                          |   |
|       |   |   |   |  |  |     | 0.007                 | 0.015 1,N          |                            | SOM GT:/0:18 0/1:323,67 C  | T                          |   |
|       |   |   |   |  |  |     |                       |                    |                            | SOM GT:/0:10 0/1:194,51 G  | A                          |   |
|       |   |   |   |  |  |     |                       |                    |                            | SOM GT:/0:39 0/1:53,11:3 C | G                          |   |
|       |   |   |   |  |  |     | 0.0                   | 0.975 0.998 0.99   | 6 4.03.                    | SOM GT:/0:70 0/1:129,26 G  | A                          |   |
|       |   |   |   |  |  |     |                       |                    | 3.43.                      | SOM GT:/0:41 0/1:71,9:37 G | C                          |   |
|       |   |   |   |  |  |     |                       |                    |                            | SOM GT:/0:11 0/1:24,3:37 T | G                          |   |
|       |   |   |   |  |  |     |                       |                    |                            | SOM GT:/0:11 0/1:25,3:37 T | C                          |   |
|       |   |   |   |  |  | ##  | 0 .                   | 0.708 0.999 1,D    |                            | SOM GT:/0:12 0/1:251,47 C  | T                          |   |
|       |   |   |   |  |  |     |                       |                    |                            | SOM GT:/0:32 0/1:47,9:37 C | T                          |   |
|       |   |   |   |  |  |     |                       |                    |                            | 3.20.                      | SOM GT:/0:12 0/1:13,3:37 G | A |
| 4E-04 |   |   |   |  |  |     |                       |                    | 0 0                        | SOM GT:/0:11 0/1:164,65 C  | T                          |   |
|       |   |   |   |  |  |     |                       |                    |                            | 5.4 1.35.                  | SOM GT:/0:50 0/1:82,18:3 G | C |
| 1E-03 |   |   |   |  |  |     |                       |                    |                            |                            | SOM GT:/0:68 0/1:77,29:3 C | T |
|       |   |   |   |  |  |     |                       |                    | 0.                         | SOM GT:/0:33 0/1:55,15:3 G | A                          |   |
|       |   |   |   |  |  |     |                       |                    |                            |                            | SOM GT:/0:8,(0/1:14,3:37 G | C |
| 0.002 | 0 | 0 | 0 |  |  |     |                       |                    | 0                          | DB;GT:/0:52 0/1:78,22:3 G  | A                          |   |
|       |   |   |   |  |  |     | 0.5                   | 0.023 0.089 1,N    | 2.3 .                      | SOM GT:/0:11 0/1:200,52 C  | G                          |   |
|       |   |   |   |  |  |     |                       |                    |                            |                            | SOM GT:/0:35 0/1:40,13:3 G | T |
|       |   |   |   |  |  |     |                       |                    |                            |                            | SOM GT:/0:13 0/1:34,5:37 C | A |
|       |   |   |   |  |  |     |                       |                    |                            |                            | SOM GT:/0:79 0/1:103,30 G  | A |
|       |   |   |   |  |  |     |                       |                    | 0.                         | SOM GT:/0:8,(0/1:19,3:37 T | G                          |   |
|       |   |   |   |  |  |     |                       |                    |                            |                            | SOM GT:/0:34 0/1:29,13:3 G | A |
|       |   |   |   |  |  |     | 0.4                   | 0.353 0.824 1,N    | 3.2 .                      | SOM GT:/0:55 0/1:96,17:3 G | C                          |   |
|       |   |   |   |  |  |     | 0.0                   | 0.993 1.0,D 0.99 . | 1.34 .                     | SOM GT:/0:49 0/1:84,14:3 G | C                          |   |
|       |   |   |   |  |  |     | 0.0                   | 0.006 0.026 1.00 . |                            | SOM GT:/0:44 0/1:75,14:3 G | C                          |   |
|       |   |   |   |  |  |     |                       |                    |                            |                            | SOM GT:/0:10 0/1:24,9:37 C | T |
|       |   |   |   |  |  |     |                       |                    |                            |                            | SOM GT:/0:20 0/1:27,4:24 T | G |

|       |    |    |   |  |  |  |  |  |  |                               |   |
|-------|----|----|---|--|--|--|--|--|--|-------------------------------|---|
|       |    |    |   |  |  |  |  |  |  | SOM GT:/0:14 0/1:26,10:3 G    | A |
|       |    |    |   |  |  |  |  |  |  | SOM GT:/0:80 0/1:139,28 G     | A |
|       |    |    |   |  |  |  |  |  |  | SOM GT:/0:23 0/1:58,10:3 C    | G |
|       |    |    |   |  |  |  |  |  |  | SOM GT:/0:32 0/1:81,5:37 C    | G |
|       |    |    |   |  |  |  |  |  |  | SOM GT:/0:32 0/1:73,21:3 G    | A |
|       |    |    |   |  |  |  |  |  |  | SOM GT:/0:21 0/1:52,9:37 C    | G |
| 6E-04 |    |    |   |  |  |  |  |  |  | DB;SOM GT:/0:22 0/1:59,6:32 G | A |
|       |    |    |   |  |  |  |  |  |  | SOM GT:/0:30 0/1:33,13:3 C    | T |
|       |    |    |   |  |  |  |  |  |  | SOM GT:/0:91 0/1:183,43 C     | G |
| 2E-04 | ## | ## |   |  |  |  |  |  |  | SOM GT:/0:63 0/1:96,24:3 C    | T |
|       |    |    |   |  |  |  |  |  |  | SOM GT:/0:64 0/1:97,21:3 C    | T |
|       |    |    |   |  |  |  |  |  |  | SOM GT:/0:20 0/1:56,5:37 C    | T |
|       |    |    |   |  |  |  |  |  |  | SOM GT:/0:23 0/1:536,30 C     | T |
|       |    |    |   |  |  |  |  |  |  | SOM GT:/0:15 0/1:15,3:28 G    | T |
|       |    |    |   |  |  |  |  |  |  | SOM GT:/0:42 0/1:79,16:3 G    | A |
|       |    |    |   |  |  |  |  |  |  | SOM GT:/0:11 0/1:17,3:37 G    | A |
|       |    |    |   |  |  |  |  |  |  | SOM GT:/0:11 0/1:17,3:37 C    | T |
|       |    |    |   |  |  |  |  |  |  | DB;SOM GT:/0:22 0/1:22,5:37 A | C |
|       |    |    |   |  |  |  |  |  |  | SOM GT:/0:23 0/1:54,7:37 T    | G |
|       |    |    |   |  |  |  |  |  |  | SOM GT:/0:15 0/1:30,9:37 G    | A |
|       |    |    |   |  |  |  |  |  |  | DB;SOM GT:/0:54 0/1:150,6:3 C | T |
|       |    |    |   |  |  |  |  |  |  | SOM GT:/0:9,(0/1:12,3:28 C    | A |
|       |    |    |   |  |  |  |  |  |  | SOM GT:/0:38 0/1:40,12:3 T    | C |
|       |    |    |   |  |  |  |  |  |  | SOM GT:/0:32 0/1:26,9:34 G    | A |
|       |    |    |   |  |  |  |  |  |  | SOM GT:/0:75 0/1:111,20 G     | A |
|       |    |    |   |  |  |  |  |  |  | DB;SOM GT:/0:87 0/1:69,62:3 G | C |
|       |    |    |   |  |  |  |  |  |  | DB;SOM GT:/0:32 0/1:45,6:37 G | A |
|       |    |    |   |  |  |  |  |  |  | SOM GT:/0:42 0/1:46,15:3 C    | G |
|       |    |    |   |  |  |  |  |  |  | SOM GT:/0:70 0/1:122,11 C     | T |
|       |    |    |   |  |  |  |  |  |  | SOM GT:/0:13 0/1:28,6:35 T    | A |
|       |    |    |   |  |  |  |  |  |  | SOM GT:/0:11 0/1:28,4:37 G    | C |
|       |    |    |   |  |  |  |  |  |  | SOM GT:/0:8,(0/1:12,4:37 G    | T |
| 0.04  | 0  | 0  |   |  |  |  |  |  |  | DB;SOM GT:/0:60 0/1:105,5:3 C | T |
|       |    |    |   |  |  |  |  |  |  | SOM GT:/0:30 0/1:28,7:37 G    | A |
| 0.148 |    |    |   |  |  |  |  |  |  | SOM GT:/0:8,(0/1:7,3:37 C     | G |
|       |    |    |   |  |  |  |  |  |  | SOM GT:/0:14 0/1:31,11:3 G    | C |
| 0.03  |    |    |   |  |  |  |  |  |  | SOM GT:/0:11 0/1:47,3:37 C    | T |
|       |    |    |   |  |  |  |  |  |  | SOM GT:/0:32 0/1:39,9:37 C    | G |
|       |    |    |   |  |  |  |  |  |  | SOM GT:/0:12 0/1:181,61 G     | A |
|       |    |    |   |  |  |  |  |  |  | SOM GT:/0:17 0/1:28,9:32 G    | T |
|       | ## | 0  |   |  |  |  |  |  |  | SOM GT:/0:12 0/1:151,41 G     | A |
|       |    |    |   |  |  |  |  |  |  | SOM GT:/0:14 0/1:15,17:3 G    | C |
|       |    |    |   |  |  |  |  |  |  | SOM GT:/0:70 0/1:159,7:3 G    | C |
|       | ## | ## |   |  |  |  |  |  |  | SOM GT:/0:46 0/1:79,4:37 C    | T |
|       |    |    |   |  |  |  |  |  |  | SOM GT:/0:11 0/1:190,52 G     | C |
|       | ## | ## | 0 |  |  |  |  |  |  | SOM GT:/0:88 0/1:131,45 G     | A |
|       |    |    |   |  |  |  |  |  |  | SOM GT:/0:30 0/1:37,13:3 C    | G |
|       |    |    |   |  |  |  |  |  |  | SOM GT:/0:16 0/1:274,68 C     | T |
|       |    |    |   |  |  |  |  |  |  | SOM GT:/0:9,(0/1:15,8:37 G    | A |
|       | ## | 0  |   |  |  |  |  |  |  | SOM GT:/0:12 0/1:159,30 G     | A |
|       |    |    |   |  |  |  |  |  |  | SOM GT:/0:16 0/1:26,3:37 C    | T |
|       |    |    |   |  |  |  |  |  |  | SOM GT:/0:9,(0/1:3,2:37 G     | A |
|       | ## | 0  |   |  |  |  |  |  |  | SOM GT:/0:13 0/1:21,5:37 T    | C |
|       |    |    |   |  |  |  |  |  |  | SOM GT:/0:19 0/1:13,4:37 G    | A |

|       |  |  |     |       |       |       |       |      |     |      |          |                     |                     |   |   |
|-------|--|--|-----|-------|-------|-------|-------|------|-----|------|----------|---------------------|---------------------|---|---|
|       |  |  | 0.0 | 0.005 | 0.005 | 1,N   | 3.9   |      |     | SOM  | GT:/0:47 | 0/1:88,27:3         | C                   | G |   |
|       |  |  |     |       |       | 1,D   | 5.6   | 5.60 |     |      | SOM      | GT:/0:67            | 0/1:117,8:3         | C | A |
|       |  |  |     |       |       |       |       |      |     |      | SOM      | GT:/0:27            | 0/1:54,13:3         | G | T |
|       |  |  | 0.0 | 0.185 | 0.645 | 1,D   | 5.9   | 4.00 |     |      | SOM      | GT:/0:60            | 0/1:73,16:3         | G | A |
|       |  |  |     |       |       |       |       |      |     |      | SOM      | GT:/0:53            | 0/1:72,18:3         | G | A |
|       |  |  |     |       |       |       |       |      |     |      | SOM      | GT:/0:20            | 0/1:33,9:37         | G | A |
|       |  |  |     |       |       |       | 2.04  |      |     |      | SOM      | GT:/0:32            | 0/1:41,12:3         | C | G |
|       |  |  |     |       |       |       | 5.1   | 1.74 |     |      | SOM      | GT:/0:64            | 0/1:84,15:3         | G | A |
|       |  |  |     |       |       |       | 2.6   | 2.43 |     |      | SOM      | GT:/0:34            | 0/1:62,21:3         | A | G |
|       |  |  |     |       |       |       |       |      |     |      | SOM      | GT:/0:53            | 0/1:102,37          | G | A |
|       |  |  |     |       |       |       |       |      |     |      | SOM      | GT:/0:32            | 0/1:66,18:3         | C | T |
|       |  |  |     |       |       |       |       |      | 0   | 0    | SOM      | GT:/0:14            | 0/1:24,4:37         | T | C |
|       |  |  |     |       |       | 1,A   | 4.7   | 9.66 |     |      | SOM      | GT:/0:62            | 0/1:108,29          | C | G |
|       |  |  |     |       |       | 1,A   | 4.4   | 6.48 |     |      | SOM      | GT:/0:48            | 0/1:75,21:3         | G | A |
|       |  |  |     |       |       |       |       |      |     |      | SOM      | GT:/0:23            | 0/1:47,8:37         | C | G |
|       |  |  |     |       |       |       |       |      |     |      | SOM      | GT:/0:48            | 0/1:57,17:3         | G | A |
|       |  |  |     |       |       | 1,A   | 5.2   | 5.59 |     |      | SOM      | GT:/0:38            | 0/1:63,22:3         | C | T |
|       |  |  | 0.0 | 0.771 | 0.935 | 1,N   |       | 1.24 |     |      | SOM      | GT:/0:22            | 0/1:47,11:3         | G | C |
|       |  |  | 0.0 | 0.577 | 0.879 | 1.00  | 4.9   | 3.19 |     |      | SOM      | GT:/0:74            | 0/1:98,23:3         | G | A |
|       |  |  |     |       |       |       |       |      |     |      | SOM      | GT:/0:24            | 0/1:26,14:3         | G | A |
|       |  |  | 0.4 | 0.002 | 0.001 | 1.00  | 4.3   | 1.36 |     |      | SOM      | GT:/0:78            | 0/1:144,35          | C | T |
|       |  |  | 0.2 | 0.002 | 0.008 | 0.79  | 4.1   |      |     |      | SOM      | GT:/0:20            | 0/1:59,9:37         | G | A |
|       |  |  | 0   | 0     | 0.6   | 0.86, | 0.998 | 0.83 | 4.1 |      | SOM      | GT:/0:63            | 0/1:98,25:3         | G | A |
|       |  |  |     |       |       |       |       |      |     | 0    | SOM      | GT:/0:15            | 0/1:23,8:14         | A | C |
|       |  |  |     |       |       |       |       |      |     | 0    | 0        | SOM                 | GT:/0/1:0:11,0:..11 | T | C |
|       |  |  |     |       |       |       |       |      |     | 0    | 0        | SOM                 | GT:/0/1:0:13,0:..13 | G | A |
|       |  |  |     |       |       |       |       |      |     | 0    | 0        | SOM                 | GT:/0/1:0:17,0:..17 | C | T |
|       |  |  |     |       |       |       |       |      |     |      | SOM      | GT:/0/1:0:19,0:..19 | G                   | T |   |
|       |  |  |     |       |       |       |       |      |     |      | SOM      | GT:/0/1:0:24,0:..24 | G                   | A |   |
|       |  |  |     |       |       |       |       |      |     | 0    | SOM      | GT:/0/1:0:20,0:..20 | A                   | C |   |
|       |  |  |     |       |       |       |       |      | 0.1 | 0.4  | DB;S     | GT:/0/1:0:31,0:..31 | C                   | T |   |
| 0.001 |  |  |     |       |       |       |       |      |     | 0    | SOM      | GT:/0/1:0:40,1:..41 | T                   | C |   |
|       |  |  |     |       |       |       |       |      |     | 0    | 0.1      | SOM                 | GT:/0/1:0:15,0:..10 | C | A |
|       |  |  |     |       |       |       |       |      |     | 0.3  | 0.4      | DB;S                | GT:/0/1:0:20,0:..20 | C | G |
| 0.005 |  |  |     |       |       |       |       |      |     | 0    | 0        | SOM                 | GT:/0/1:0:10,0:..10 | G | A |
|       |  |  | 0   | 0     | 0.0   | 1.0,D | 1.0,D | 1.00 | 4.5 | 3.37 |          | DB;S                | GT:/0/1:0:46,1:..47 | G | C |
|       |  |  |     |       |       |       |       |      |     | 0    | SOM      | GT:/0/1:0:45,1:..46 | A                   | C |   |
|       |  |  | ##  | 0     |       |       |       |      |     |      | SOM      | GT:/0/1:0:93,0:..93 | C                   | T |   |
|       |  |  | ##  | 0     | 0.0   | 0.983 | 1.0,D | 1.00 | 4.8 | 3.42 |          | SOM                 | GT:/0/1:0:70,1:..71 | C | T |
|       |  |  |     |       |       |       |       |      |     | 0    | 0        | SOM                 | GT:/0/1:0:8,0:..9:0 | C | T |
|       |  |  |     |       |       |       |       |      |     |      | SOM      | GT:/0/1:0:45,1:..46 | G                   | C |   |
|       |  |  |     |       |       |       |       |      | 0.3 | 0.5  | DB;S     | GT:/0/1:0:19,0:..17 | T                   | C |   |
|       |  |  |     |       |       |       |       |      | 0.3 | 0.4  | SOM      | GT:/0/1:0:17,0:..15 | A                   | C |   |
|       |  |  |     |       |       |       |       |      |     | 0    | 0.1      | SOM                 | GT:/0/1:0:8,0:..9:0 | T | A |
|       |  |  |     |       |       |       |       |      |     | 0    | 0        | SOM                 | GT:/0/1:0:26,0:..26 | C | A |
|       |  |  |     |       |       |       |       |      |     | 0    | 0        | SOM                 | GT:/0/1:0:9,0:..7:0 | C | A |
|       |  |  |     |       |       |       |       |      |     |      | SOM      | GT:/0/1:0:53,1:..47 | T                   | A |   |
|       |  |  |     |       |       |       |       |      |     | 0    | SOM      | GT:/0/1:0:28,0:..28 | A                   | T |   |
|       |  |  |     |       |       |       |       |      |     | 0    | SOM      | GT:/0/1:0:45,0:..44 | C                   | G |   |
|       |  |  |     |       |       |       |       |      |     | 0    | SOM      | GT:/0/1:0:10,0:..10 | G                   | A |   |
|       |  |  |     |       |       |       |       |      |     | 0    | SOM      | GT:/0/1:0:8,0:..8:0 | T                   | A |   |
|       |  |  |     |       |       |       |       |      |     |      | SOM      | GT:/0/1:0:43,0:..40 | G                   | T |   |
|       |  |  |     |       |       |       |       |      |     | 0    | SOM      | GT:/0/1:0:8,0:..6:0 | G                   | C |   |
|       |  |  |     |       |       |       |       |      |     | 0    | 0        | SOM                 | GT:/0/1:0:11,0:..11 | G | A |

|       |    |    |   |           |               |     |      |     |     |                           |   |   |
|-------|----|----|---|-----------|---------------|-----|------|-----|-----|---------------------------|---|---|
|       |    |    |   |           |               |     |      | 0   | 0   | SOMGT:/0/1:/0:12,0::12    | G | A |
|       |    |    |   |           |               |     |      | 0   |     | SOMGT:/0/1:/0:43,0::43    | T | G |
| 0.351 |    |    |   |           |               |     |      | 0   | 0.2 | SOMGT:/0/1:/0:12,0::7:C   | T | A |
|       |    |    |   |           |               |     |      | 0   | 0   | SOMGT:/0/1:/0:10,0::9:C   | T | C |
|       |    |    |   |           |               |     |      | 0   | 0   | SOMGT:/0/1:/0:10,0::9:C   | A | G |
|       |    |    |   |           |               |     |      |     |     | SOMGT:/0/1:/0:23,0::23    | A | C |
|       |    |    |   |           |               |     |      | 0   | 0.1 | SOMGT:/0/1:/0:15,0::16    | T | C |
| 0.052 |    |    |   |           |               |     |      | 0.2 | 0.5 | SOMGT:/0/1:/0:9,0::9:0:A  | A | C |
|       |    |    |   |           |               |     |      |     |     | SOMGT:/0/1:/0:52,0::22    | G | C |
|       |    |    |   |           |               |     |      |     |     | SOMGT:/0/1:/0:8,0::6:0:A  | A | A |
|       |    |    |   |           |               |     |      |     |     | SOMGT:/0/1:/0:69,1::68    | G | T |
|       |    | 0  | 0 | 0.0       | 0.1070,4311,N | 4.8 | 2.17 | 0.1 |     | SOMGT:/0/1:/0:9,0::9:0:A  | A | A |
|       |    |    |   |           |               |     |      | 0   |     | SOMGT:/0/1:/0:33,1::33    | G | A |
|       |    |    |   |           |               |     |      | 0   | 0   | SOMGT:/0/1:/0:37,0::37    | A | G |
|       |    |    |   |           |               |     |      |     |     | SOMGT:/0/1:/0:52,1::52    | G | T |
|       |    |    |   |           |               |     |      | 0   |     | SOMGT:/0/1:/0:14,1::10    | A | G |
|       |    |    |   |           |               |     |      |     |     | SOMGT:/0/1:/0:70,0::70    | C | T |
|       |    |    |   |           |               |     |      |     |     | SOMGT:/0/1:/0:10,0::10    | T | C |
|       |    |    |   |           |               |     |      |     |     | SOMGT:/0/1:/0:25,0::25    | A | T |
| 0.002 |    |    |   |           |               |     |      | 0   | 0   | SOMGT:/0/1:/0:8,0::8:0:A  | A | T |
|       |    |    |   |           |               |     | 3.9  |     | 0   | SOMGT:/0/1:/0:12,0::12    | C | G |
|       |    |    |   |           |               |     | 1.88 |     | 0   | SOMGT:/0/1:/0:20,0::20    | T | G |
|       |    |    |   |           |               |     | 2.5  |     |     | SOMGT:/0/1:/0:25,0::25    | G | A |
|       |    |    |   |           |               |     |      | 0   |     | SOMGT:/0/1:/0:24,0::24    | T | G |
|       |    |    |   |           |               |     |      | 0   |     | SOMGT:/0/1:/0:23,0::23    | T | G |
|       |    |    |   |           |               |     |      | 0   | 0.2 | SOMGT:/0/1:/0:14,0::14    | G | A |
|       |    |    |   |           |               |     |      | 0   | 0.1 | SOMGT:/0/1:/0:10,0::11    | A | G |
|       |    |    |   |           |               |     |      |     |     | SOMGT:/0/1:/0:34,0::33    | A | G |
|       |    |    |   |           |               |     |      |     |     | SOMGT:/0/1:/0:57,1::59    | C | T |
| 4E-04 | 0  | 0  | 0 |           |               |     |      | 0   |     | SOMGT:/0/1:/0:27,0::27    | G | A |
|       |    |    |   |           |               |     |      |     |     | SOMGT:/0/1:/0:32,0::32    | G | A |
|       |    |    |   |           |               |     |      | 0   | 0   | SOMGT:/0/1:/0:23,0::20    | C | T |
| 0.477 |    |    |   |           |               |     |      | 0.1 | 0.4 | SOMGT:/0/1:/0:9,0::7:0:A  | A | T |
|       |    |    |   |           |               |     |      | 0   |     | SOMGT:/0/1:/0:20,0::20    | T | C |
|       |    |    |   |           |               |     |      | 0   |     | SOMGT:/0/1:/0:59,1::60    | G | A |
|       |    |    |   |           |               |     |      | 0   |     | SOMGT:/0/1:/0:18,0::18    | A | C |
|       |    |    |   |           |               |     |      |     |     | SOMGT:/0/1:/0:15,0::15    | A | G |
|       |    |    |   | 0.110,127 | 0.05,10.69    |     | 1.65 |     |     | SOMGT:/0/1:/0:74,0::74    | C | A |
|       |    |    |   |           |               |     |      |     |     | SOMGT:/0/1:/0:45,0::45    | C | A |
|       | ## | ## | 0 |           |               |     | 2.1  |     |     | SOMGT:/0/1:/0:75,0::75    | T | C |
|       |    |    |   |           |               |     |      | 0   |     | SOMGT:/0/1:/0:35,0::35    | C | G |
|       |    |    |   |           |               |     |      | 0   | 0   | DB;SOMGT:/0/1:/0:59,1::59 | A | G |
|       |    |    |   |           |               |     |      | 0   |     | DB;SOMGT:/0/1:/0:43,1::35 | G | T |
|       |    | ## | 0 |           |               |     |      |     |     | SOMGT:/0/1:/0:77,0::77    | C | T |
|       |    |    |   |           |               |     |      |     |     | SOMGT:/0/1:/0:24,0::24    | A | C |
|       |    |    |   |           |               |     |      | 0   |     | SOMGT:/0/1:/0:9,0::9:0:A  | A | A |
|       |    |    |   |           |               |     |      |     |     | SOMGT:/0/1:/0:8,0::6:0:A  | A | G |
|       |    |    |   |           |               |     |      | 0   |     | SOMGT:/0/1:/0:20,1::21    | A | C |
|       |    |    |   |           |               |     |      | 0   | 0   | SOMGT:/0/1:/0:12,0::9:C   | T | A |
|       |    |    |   |           |               |     |      |     |     | SOMGT:/0/1:/0:8,0::8:0:A  | A | G |
|       |    |    |   |           |               |     |      |     |     | SOMGT:/0/1:/0:46,0::45    | C | G |
|       |    |    |   |           |               |     |      |     |     | SOMGT:/0/1:/0:27,0::27    | C | G |
|       |    |    |   |           |               |     |      |     |     | SOMGT:/0/1:/0:18,0::5:C   | C | G |
|       |    |    |   |           |               |     |      |     |     | SOMGT:/0/1:/0:10,0::9:C   | C | A |

|       |    |    |                      |     |       |   |           |         |                           |   |
|-------|----|----|----------------------|-----|-------|---|-----------|---------|---------------------------|---|
| .     | .  | .  | .                    | .   | .     | . | .         | .       | SOMGT:/0/1:0:20,0::13 G   | T |
| .     | .  | .  | .                    | .   | .     | . | .         | .       | SOMGT:/0/1:0:23,0::13 C   | T |
| .     | .  | .  | .                    | .   | .     | . | .         | .       | SOMGT:/0/1:0:23,0::23 A   | C |
| .     | .  | .  | .                    | .   | .     | . | .         | .       | DB;GT:/0/1:0:39,0::14 C   | A |
| .     | .  | .  | .                    | .   | .     | . | .         | 0.      | DB;GT:/0/1:0:22,0::14 A   | C |
| .     | .  | .  | .                    | .   | .     | . | .         | 0 0.4   | SOMGT:/0/1:0:8,0::4:0: G  | T |
| .     | .  | .  | .                    | .   | .     | . | .         | 0.      | SOMGT:/0/1:0:9,0::7:0: G  | A |
| .     | .  | .  | .                    | .   | .     | . | .         | 0 0     | DB;GT:/0/1:0:23,0::22 C   | T |
| .     | .  | .  | .                    | .   | .     | . | .         | 0.      | SOMGT:/0/1:0:9,0::4:0: G  | A |
| .     | .  | .  | .                    | .   | .     | . | .         | 0 0.1   | SOMGT:/0/1:0:14,0::14 C   | G |
| .     | .  | .  | .                    | .   | .     | . | 4.2 3.16. | .       | SOMGT:/0/1:0:87,1::71 T   | C |
| .     | .  | .  | .                    | .   | .     | . | .         | 0.2 0.3 | SOMGT:/0/1:0:24,0::24 A   | C |
| .     | .  | .  | .                    | .   | .     | . | .         | .       | SOMGT:/0/1:0:25,0::25 T   | G |
| .     | .  | .  | .                    | .   | .     | . | .         | .       | SOMGT:/0/1:0:34,0::27 T   | G |
| .     | .  | .  | .                    | .   | .     | . | .         | .       | SOMGT:/0/1:0:18,0::7:0: G | A |
| .     | .  | .  | .                    | .   | .     | . | .         | .       | SOMGT:/0/1:0:20,0::12 A   | G |
| .     | .  | .  | .                    | .   | .     | . | .         | .       | SOMGT:/0/1:0:50,0::19 C   | G |
| .     | .  | .  | .                    | .   | .     | . | .         | 0.      | SOMGT:/0/1:0:37,1::23 G   | C |
| .     | .  | .  | .                    | .   | .     | . | .         | 0.      | SOMGT:/0/1:0:9,0::9:0: C  | T |
| .     | .  | .  | 0.0 0.998 0.999 1.00 | 4.8 | 4.21. | . | .         | .       | DB;GT:/0/1:0:88,0::88 G   | A |
| .     | .  | 0  | 0.                   | .   | .     | . | .         | 0 0     | SOMGT:/0/1:0:14,1::15 T   | G |
| .     | .  | .  | .                    | .   | .     | . | .         | .       | SOMGT:/0/1:0:18,1::19 G   | A |
| .     | .  | 0  | 0.                   | .   | .     | . | .         | 0 0     | DB;GT:/0/1:0:48,1::46 A   | C |
| .     | .  | .  | .                    | .   | .     | . | .         | 0.1 0.2 | DB;GT:/0/1:0:38,1::39 G   | A |
| .     | .  | .  | .                    | .   | .     | . | .         | 0 0.1   | SOMGT:/0/1:0:8,0::8:0: T  | C |
| .     | .  | .  | .                    | .   | .     | . | .         | 0 0     | SOMGT:/0/1:0:57,0::57 T   | C |
| .     | .  | .  | .                    | .   | .     | . | 1.65      | 0.      | SOMGT:/0/1:0:26,1::27 C   | G |
| .     | .  | .  | .                    | .   | .     | . | .         | .       | SOMGT:/0/1:0:37,0::37 T   | G |
| .     | .  | .  | .                    | .   | .     | . | .         | 0 0     | SOMGT:/0/1:0:8,0::7:0: C  | T |
| .     | .  | .  | .                    | .   | .     | . | .         | 0 0.2   | SOMGT:/0/1:0:8,0::8:0: T  | C |
| .     | .  | .  | .                    | .   | .     | . | .         | 0.      | SOMGT:/0/1:0:16,0::16 G   | T |
| .     | .  | .  | .                    | .   | .     | . | .         | 0.      | SOMGT:/0/1:0:13,0::13 T   | C |
| .     | .  | .  | .                    | .   | .     | . | 2.5.      | .       | SOMGT:/0/1:0:50,1::51 T   | C |
| .     | .  | .  | .                    | .   | .     | . | .         | 0 0.1   | SOMGT:/0/1:0:12,0::12 A   | G |
| 1E-03 | .  | .  | .                    | .   | .     | . | .         | .       | SOMGT:/0/1:0:11,0::11 G   | A |
| 6E-04 | 0  | 0  | 0.                   | .   | .     | . | 2.28.     | .       | SOMGT:/0/1:0:38,0::38 G   | A |
| .     | .  | .  | .                    | .   | .     | . | .         | 0 0.1   | SOMGT:/0/1:0:12,0::12 T   | C |
| 0.433 | 1  | 1. | .                    | .   | .     | . | .         | 0.1 0.5 | SOMGT:/0/1:0:41,0::29 C   | G |
| .     | .  | .  | .                    | .   | .     | . | .         | 0.      | SOMGT:/0/1:0:23,0::23 T   | C |
| .     | .  | .  | .                    | .   | .     | . | .         | 0.      | SOMGT:/0/1:0:24,0::24 G   | A |
| .     | .  | .  | .                    | .   | .     | . | .         | 0.      | SOMGT:/0/1:0:8,0::8:0: C  | T |
| .     | .  | .  | .                    | .   | .     | . | .         | 0 0     | SOMGT:/0/1:0:20,0::20 T   | C |
| .     | .  | .  | 0.0 0.037 0.053 1,D  | 5.1 | 3.04. | . | .         | .       | DB;GT:/0/1:0:39,0::39 G   | T |
| 4E-04 | .  | .  | .                    | .   | .     | . | .         | 0 0     | SOMGT:/0/1:0:10,0::10 G   | A |
| .     | .  | .  | .                    | .   | .     | . | 4.2 2.69  | 0.      | SOMGT:/0/1:0:67,1::68 G   | A |
| .     | .  | .  | .                    | .   | .     | . | .         | .       | SOMGT:/0/1:0:36,0::36 T   | G |
| .     | .  | .  | .                    | .   | .     | . | .         | 0.      | SOMGT:/0/1:0:12,0::12 T   | C |
| .     | .  | .  | 0.0 0.26 0.612 1,D   | 4.6 | 3.17. | . | .         | .       | SOMGT:/0/1:0:70,1::71 T   | C |
| .     | .  | .  | .                    | .   | .     | . | 3.9 1.70  | 0 0     | SOMGT:/0/1:0:40,1::41 C   | T |
| .     | .  | .  | .                    | .   | .     | . | .         | .       | SOMGT:/0/1:0:30,0::30 C   | T |
| 4E-04 | ## | ## | 0.                   | .   | .     | . | .         | .       | SOMGT:/0/1:0:176,1::1 G   | A |
| .     | .  | .  | .                    | .   | .     | . | .         | 0 0     | DB;GT:/0/1:0:49,1::50 T   | C |
| .     | .  | .  | .                    | .   | .     | . | .         | .       | SOMGT:/0/1:0:8,0::4:0: C  | T |
| .     | .  | .  | .                    | .   | .     | . | .         | 0 0     | SOMGT:/0/1:0:10,0::9:0: C | T |



|       |  |  |     |      |      |     |      |                      |                     |      |                    |                     |                     |   |
|-------|--|--|-----|------|------|-----|------|----------------------|---------------------|------|--------------------|---------------------|---------------------|---|
|       |  |  |     |      | 0    | 0   | SOM  | GT:/0/1:20:10,0::9:( | C                   |      |                    |                     |                     |   |
|       |  |  |     |      |      |     |      | SOM                  | GT:/0/1:0:19,0::9:( | G    |                    |                     |                     |   |
|       |  |  | 0.5 | 0.55 | 0.99 | 1,D | 3.9  | 2.76                 |                     | SOM  | GT:/0/1:0:92,0::92 | G                   |                     |   |
|       |  |  |     |      |      |     |      |                      |                     | SOM  | GT:/0/1:0:20,0::22 | A                   |                     |   |
|       |  |  |     |      |      |     |      |                      |                     | SOM  | GT:/0/1:0:29,0::29 | C                   |                     |   |
| 0.258 |  |  |     |      |      |     |      |                      |                     | SOM  | GT:/0/1:0:9,0::9:0 | C                   |                     |   |
|       |  |  |     |      |      |     |      |                      |                     | SOM  | GT:/0/1:0:22,0::14 | C                   |                     |   |
|       |  |  |     |      |      |     |      |                      |                     | SOM  | GT:/0/1:0:27,1::28 | A                   |                     |   |
|       |  |  |     |      |      |     |      |                      |                     | SOM  | GT:/0/1:0:75,1::72 | G                   |                     |   |
| 0.192 |  |  |     |      |      |     |      |                      |                     | DB;S | GT:/0/1:0:38,0::38 | T                   |                     |   |
| 0.485 |  |  |     |      |      |     |      |                      | 0.1                 | 0.1  | DB;S               | GT:/0/1:0:41,0::41  | T                   |   |
|       |  |  |     |      |      |     |      |                      |                     |      | SOM                | GT:/0/1:0:38,0::25  | G                   |   |
|       |  |  |     |      |      |     |      |                      |                     |      | SOM                | GT:/0/1:0:11,0::6:( | G                   |   |
| 0.324 |  |  |     |      |      |     |      |                      |                     |      | SOM                | GT:/0/1:0:11,0::11  | G                   |   |
|       |  |  |     |      |      |     | 2.1  |                      |                     |      | SOM                | GT:/0/1:0:39,0::39  | A                   |   |
|       |  |  |     |      |      |     |      | 2.12                 |                     |      | SOM                | GT:/0/1:0:44,1::45  | T                   |   |
|       |  |  | 0.0 |      | 0.99 |     | 1.82 |                      |                     |      | SOM                | GT:/0/1:0:20,0::13  | C                   |   |
| 0.327 |  |  |     |      |      |     |      |                      |                     | 0    | 0.5                | SOM                 | GT:/0/1:0:12,0::12  | T |
|       |  |  |     |      |      |     |      |                      |                     |      |                    | SOM                 | GT:/0/1:0:10,0::10  | C |
| 8E-04 |  |  |     |      |      |     |      |                      |                     |      |                    | DB;S                | GT:/0/1:0:34,1::35  | T |
|       |  |  |     |      |      |     |      |                      |                     | 0    | 0                  | SOM                 | GT:/0/1:0:13,0::14  | G |
|       |  |  |     |      |      |     |      |                      |                     |      |                    | SOM                 | GT:/0/1:0:8,0::8:0  | C |
|       |  |  |     |      |      |     |      |                      |                     |      |                    | SOM                 | GT:/0/1:0:11,0::9:( | C |
| 4E-04 |  |  |     |      |      |     |      |                      |                     |      |                    | SOM                 | GT:/0/1:0:12,0::7:( | T |
|       |  |  | 0   | 0    |      |     |      |                      |                     |      |                    | SOM                 | GT:/0/1:0:18,0::18  | T |
|       |  |  |     |      |      |     |      |                      |                     |      |                    | SOM                 | GT:/0/1:0:16,0::16  | A |
|       |  |  |     |      |      |     |      |                      |                     |      |                    | DB;S                | GT:/0/1:0:54,0::53  | C |
|       |  |  |     |      |      |     |      |                      |                     |      |                    | DB;S                | GT:/0/1:0:58,1::58  | G |
|       |  |  |     |      |      |     |      |                      |                     |      |                    | SOM                 | GT:/0/1:0:20,0::15  | G |
|       |  |  |     |      |      |     |      |                      |                     |      |                    | SOM                 | GT:/0/1:0:18,0::10  | A |
|       |  |  |     |      |      |     |      |                      |                     |      |                    | SOM                 | GT:/0/1:0:30,0::25  | A |
|       |  |  |     |      |      |     |      |                      |                     |      |                    | DB;S                | GT:/0/1:0:35,1::29  | A |
|       |  |  |     |      |      |     |      |                      |                     |      |                    | DB;S                | GT:/0/1:0:46,1::47  | G |
|       |  |  |     |      |      |     |      |                      |                     | 0    | 0.1                | DB;S                | GT:/0/1:0:35,0::32  | T |
|       |  |  |     |      |      |     |      |                      |                     | 0    | 0.2                | DB;S                | GT:/0/1:0:35,1::32  | C |
|       |  |  |     |      |      |     |      |                      |                     | 0    | 0                  | DB;S                | GT:/0/1:0:30,0::16  | A |
|       |  |  |     |      |      |     |      |                      |                     |      |                    | DB;S                | GT:/0/1:0:27,0::12  | G |
|       |  |  |     |      |      |     |      |                      |                     |      |                    | DB;S                | GT:/0/1:0:33,1::21  | G |
|       |  |  |     |      |      |     |      |                      |                     |      |                    | DB;S                | GT:/0/1:0:46,1::42  | T |
|       |  |  |     |      |      |     |      |                      |                     |      |                    | SOM                 | GT:/0/1:0:39,0::23  | C |
|       |  |  |     |      |      |     |      |                      |                     |      |                    | DB;S                | GT:/0/1:0:50,0::40  | G |
|       |  |  |     |      |      |     |      |                      |                     |      |                    | SOM                 | GT:/0/1:0:11,0::2:( | C |
|       |  |  |     |      |      |     |      |                      |                     |      |                    | SOM                 | GT:/0/1:0:9,0::8:0  | G |
|       |  |  |     |      |      |     |      |                      |                     |      |                    | SOM                 | GT:/0/1:0:48,1::49  | G |
|       |  |  |     |      |      |     |      |                      |                     |      |                    | SOM                 | GT:/0/1:0:38,1::39  | T |
|       |  |  |     |      |      |     |      |                      |                     |      |                    | DB;S                | GT:/0/1:0:38,1::40  | G |
|       |  |  |     |      |      |     |      |                      |                     |      |                    | SOM                 | GT:/0/1:0:34,0::29  | G |
|       |  |  |     |      |      |     |      |                      |                     |      |                    | SOM                 | GT:/0/1:0:10,0::7:( | T |
|       |  |  |     |      |      |     |      |                      |                     |      |                    | SOM                 | GT:/0/1:0:13,0::12  | T |
|       |  |  |     |      |      |     |      |                      |                     |      |                    | SOM                 | GT:/0/1:0:9,0::8:0  | G |
|       |  |  |     |      |      |     |      |                      |                     |      |                    | SOM                 | GT:/0/1:0:13,0::12  | C |
|       |  |  | ##  | 0    |      |     |      |                      |                     |      |                    | SOM                 | GT:/0/1:0:46,0::46  | G |
|       |  |  |     |      |      |     |      |                      |                     |      |                    | SOM                 | GT:/0/1:0:28,0::24  | G |
|       |  |  |     |      |      |     |      |                      |                     |      |                    | SOM                 | GT:/0/1:0:23,0::23  | A |

|       |       |                      |          |          |         |                             |   |
|-------|-------|----------------------|----------|----------|---------|-----------------------------|---|
|       |       |                      |          |          | 0.      | SOMGT:/0/1:0:62,0::50 C     | G |
|       |       |                      |          |          |         | SOMGT:/0/1:0:67,1::53 A     | T |
|       |       | 0 0.                 |          |          |         | SOMGT:/0/1:0:27,0::28 G     | A |
|       |       |                      |          |          |         | SOMGT:/0/1:0:27,0::27 A     | C |
|       |       |                      |          | 2.1      |         | DB;SOMGT:/0/1:0:44,1::45 T  | A |
|       |       |                      |          |          | 0 0     | SOMGT:/0/1:0:10,0::10 G     | T |
|       |       |                      |          |          | 0.      | SOMGT:/0/1:0:17,0::17 G     | A |
|       |       |                      |          |          | 0.      | SOMGT:/0/1:0:16,0::16 C     | A |
|       |       |                      |          |          | 0.      | SOMGT:/0/1:0:13,1::14 T     | A |
|       |       | 0 0.                 |          |          | 0 0     | SOMGT:/0/1:0:49,1::50 A     | G |
|       |       | 0 0.                 |          | 1.77     | 0 0     | DB;SOMGT:/0/1:0:37,1::38 C  | T |
|       |       | 0 0.                 |          |          | 0 0     | DB;SOMGT:/0/1:0:27,1::28 G  | A |
|       |       | 0 0.                 |          |          | 0 0     | SOMGT:/0/1:0:38,0::33 G     | A |
|       |       | 0 0.                 |          |          |         | SOMGT:/0/1:0:58,1::59 C     | T |
|       |       |                      |          |          | 0.3 0.4 | DB;SOMGT:/0/1:0:23,0::23 A  | G |
|       |       |                      |          |          | 0 0     | DB;SOMGT:/0/1:0:43,0::42 T  | C |
|       |       |                      |          |          | 0.1 0.2 | SOMGT:/0/1:0:11,0::6:0 G    | A |
|       |       |                      |          |          |         | SOMGT:/0/1:0:9,0::5:0 A     | T |
|       |       |                      |          |          | 0 0     | SOMGT:/0/1:0:8,0::6:0 A     | G |
|       |       |                      |          |          |         | SOMGT:/0/1:0:39,1::35 T     | G |
|       |       |                      |          |          | 0 0     | DB;SOMGT:/0/1:0:33,0::33 C  | T |
| 0.24  |       |                      |          |          | 0 0.1   | SOMGT:/0/1:0:8,0::8:0 G     | T |
|       |       |                      |          |          | 0 0     | DB;SOMGT:/0/1:0:33,0::31 C  | T |
|       |       |                      |          |          | 0 0     | DB;SOMGT:/0/1:0:22,0::22 T  | C |
| 0.458 |       |                      |          |          | 0.1 0.3 | DB;SOMGT:/0/1:0:36,0::36 C  | T |
|       |       |                      |          |          | 0 0     | SOMGT:/0/1:0:35,0::35 C     | A |
|       |       |                      |          |          |         | SOMGT:/0/1:0:24,0::24 G     | A |
|       |       |                      |          | 3.1 1.73 |         | SOMGT:/0/1:0:39,1::40 C     | T |
|       |       |                      |          |          |         | SOMGT:/0/1:0:51,0::46 G     | C |
|       |       |                      |          |          |         | SOMGT:/0/1:0:39,0::27 C     | T |
|       |       |                      |          |          |         | SOMGT:/0/1:0:38,1::27 T     | C |
|       |       |                      |          |          | 0.      | SOMGT:/0/1:0:35,0::26 A     | G |
|       |       |                      |          |          |         | SOMGT:/0/1:0:15,0::10 A     | C |
|       |       | 0.2 0.0,B 0.0,B 1.00 | 5.3      |          |         | SOMGT:/0/1:0:38,1::39 C     | T |
|       |       |                      |          |          |         | SOMGT:/0/1:0:23,1::24 T     | A |
|       |       | 0.1 0.0020.0011,N    |          |          |         | SOMGT:/0/1:0:71,0::71 G     | A |
|       |       |                      |          |          | 0 0     | SOMGT:/0/1:0:23,0::23 G     | A |
|       |       |                      |          |          |         | SOMGT:/0/1:0:16,0::16 C     | T |
| 0.039 |       |                      |          |          | 0 0.1   | SOMGT:/0:11 0/1:15,8:37 C   | T |
|       |       |                      |          |          |         | SOMGT:/0:43 0/1:72,8:35 C   | T |
| 0.007 | 0 0 0 |                      |          | 1.30     |         | DB;SOMGT:/0:22 0/1:424,23 C | T |
|       |       | 0.4 0.0420.089 1,N   | 1.28     |          |         | SOMGT:/0:15 0/1:304,38 G    | A |
|       |       | 0.0 0.983 1.0,D 1.00 | 1.51     |          |         | SOMGT:/0:16 0/1:267,58 C    | T |
| 2E-04 |       |                      |          |          |         | SOMGT:/0:46 0/1:92,14:3 C   | T |
|       | ##    | 0                    |          |          |         | SOMGT:/0:69 0/1:112,19 C    | T |
|       |       |                      |          |          |         | SOMGT:/0:79 0/1:127,28 G    | A |
|       |       | 0.2 0.0620.84, 1,N   | 2.7 1.91 |          |         | SOMGT:/0:29 0/1:63,6:37 C   | T |
|       | ##    | 0                    |          |          |         | SOMGT:/0:51 0/1:93,15:3 C   | T |
|       |       |                      |          |          |         | SOMGT:/0:95 0/1:137,24 G    | A |
| 2E-04 | ##    | ##                   | 0        |          | 0       | SOMGT:/0:12 0/1:206,32 C    | T |
|       | ##    | 0                    |          |          |         | SOMGT:/0:31 0/1:505,66 G    | A |
|       |       |                      |          |          |         | SOMGT:/0:39 0/1:68,4:37 C   | T |
|       |       |                      |          |          |         | SOMGT:/0:19 0/1:28,5:37 C   | T |
|       |       |                      |          |          |         | SOMGT:/0:65 0/1:153,15 C    | A |

|       |    |    |      |       |       |       |       |            |                            |                            |                             |                            |                            |   |
|-------|----|----|------|-------|-------|-------|-------|------------|----------------------------|----------------------------|-----------------------------|----------------------------|----------------------------|---|
| .     | .  | .  | .    | .     | .     | .     | .     | .          | SOM GT:/0:23 0/1:37,4:37 G | A                          |                             |                            |                            |   |
| .     | .  | .  | .    | .     | .     | .     | .     | .          | SOM GT:/0:77 0/1:111,25 G  | A                          |                             |                            |                            |   |
| .     | .  | .  | .    | .     | .     | .     | .     | .          | SOM GT:/0:13 0/1:238,7:3 A | G                          |                             |                            |                            |   |
| .     | .  | .  | .    | .     | .     | .     | .     | .          | SOM GT:/0:28 0/1:62,11:3 C | A                          |                             |                            |                            |   |
| .     | .  | .  | 0.1: | 0.988 | 1.0,D | 0.99  | 5.5   | 4.01 .     | SOM GT:/0:17 0/1:293,62 G  | T                          |                             |                            |                            |   |
| .     | .  | .  | .    | .     | .     | .     | .     | .          | SOM GT:/0:29 0/1:47,6:37 G | A                          |                             |                            |                            |   |
| .     | .  | .  | .    | .     | .     | .     | .     | .          | SOM GT:/0:37 0/1:54,5:37 C | T                          |                             |                            |                            |   |
| .     | .  | .  | 0.0: | 0.988 | 1.0,D | 1.00  | 4.5   | 6.11 .     | SOM GT:/0:98 0/1:190,30 C  | T                          |                             |                            |                            |   |
| .     | .  | .  | 0.0: | 0.996 | 0.997 | 1,D   | 4.8   | 4.48 .     | SOM GT:/0:57 0/1:87,15:3 C | T                          |                             |                            |                            |   |
| .     | .  | .  | .    | .     | .     | .     | .     | .          | SOM GT:/0:22 0/1:50,11:3 G | A                          |                             |                            |                            |   |
| .     | .  | ## | 0 .  | .     | .     | .     | .     | 2.54 .     | SOM GT:/0:12 0/1:179,36 C  | T                          |                             |                            |                            |   |
| 4E-04 | ## | 0  | 0 .  | .     | .     | .     | .     | .          | SOM GT:/0:22 0/1:340,60 C  | T                          |                             |                            |                            |   |
| .     | .  | .  | .    | .     | .     | .     | .     | .          | SOM GT:/0:16 0/1:27,5:37 T | A                          |                             |                            |                            |   |
| .     | .  | ## | 0 .  | .     | .     | .     | .     | 2 1.90 .   | SOM GT:/0:69 0/1:85,22:3 C | T                          |                             |                            |                            |   |
| .     | .  | .  | .    | .     | .     | .     | .     | .          | SOM GT:/0:29 0/1:34,11:3 C | T                          |                             |                            |                            |   |
| .     | .  | ## | ##   | 0     | 0.1:  | 0.594 | 0.975 | 1,N .      | SOM GT:/0:64 0/1:138,23 G  | A                          |                             |                            |                            |   |
| .     | .  | .  | .    | .     | .     | .     | .     | .          | SOM GT:/0:42 0/1:56,8:37 C | T                          |                             |                            |                            |   |
| .     | .  | .  | .    | .     | .     | .     | .     | .          | SOM GT:/0:22 0/1:37,11:3 C | T                          |                             |                            |                            |   |
| .     | .  | .  | .    | .     | .     | .     | .     | .          | SOM GT:/0:17 0/1:35,6:37 A | G                          |                             |                            |                            |   |
| 0.007 | 0  | 0  | 0 .  | .     | .     | .     | .     | .          | DB;S GT:/0:11 0/1:203,38 C | T                          |                             |                            |                            |   |
| .     | .  | .  | .    | .     | .     | .     | .     | 3 1.88 .   | SOM GT:/0:33 0/1:58,15:3 C | T                          |                             |                            |                            |   |
| .     | .  | .  | .    | .     | .     | .     | .     | 3.36 .     | SOM GT:/0:11 0/1:6,5:37: G | T                          |                             |                            |                            |   |
| .     | .  | .  | .    | .     | .     | .     | .     | 0.899      | 0.994                      | 1.00                       | 6.1                         | 4.05 .                     | SOM GT:/0:35 0/1:66,8:35 C | T |
| .     | .  | .  | .    | .     | .     | .     | .     | 0          | 0                          | SOM GT:/0:65 0/1:90,7:37 G | C                           |                            |                            |   |
| 0.259 | .  | 0  | 0 .  | .     | .     | .     | .     | .          | 0 .                        | SOM GT:/0:9,(0/1:12,4:37 C | T                           |                            |                            |   |
| .     | .  | ## | 0    | 0.3:  | 0.338 | 0.975 | 1,N . | 2.01 .     | DB;S GT:/0:77 0/1:148,23 G | A                          |                             |                            |                            |   |
| .     | .  | ## | ##   | 0 .   | .     | .     | .     | .          | SOM GT:/0:10 0/1:163,30 C  | T                          |                             |                            |                            |   |
| .     | .  | .  | 0.0: | 0.763 | 0.998 | 0.96  | 2.2   | 4.05 .     | SOM GT:/0:45 0/1:111,20 G  | A                          |                             |                            |                            |   |
| .     | .  | 0  | 0    | 0 .   | .     | .     | .     | .          | 0                          | 0                          | SOM GT:/0:22 0/1:333,26 G   | A                          |                            |   |
| .     | .  | .  | .    | .     | .     | .     | .     | .          | 0                          | 0.1                        | SOM GT:/0:22 0/1:39,3:37 C  | A                          |                            |   |
| .     | .  | .  | .    | .     | .     | .     | .     | .          | 0.1                        | 0.2                        | DB;S GT:/0:23 0/1:30,3:37 T | C                          |                            |   |
| .     | .  | .  | .    | .     | .     | .     | .     | .          | 0.2                        | 0.3                        | DB;S GT:/0:56 0/1:81,11:3 A | T                          |                            |   |
| .     | .  | .  | .    | .     | .     | .     | .     | .          | .                          | .                          | DB;S GT:/0:24 0/1:35,3:37 G | A                          |                            |   |
| 0.005 | .  | .  | .    | .     | .     | .     | .     | .          | 0                          | 0                          | DB;S GT:/0:44 0/1:71,15:3 G | A                          |                            |   |
| .     | .  | ## | .    | 0.0:  | 0.023 | 0.065 | 1.00  | 4 3.56 .   | 0                          | SOM GT:/0:49 0/1:92,19:3 C | T                           |                            |                            |   |
| .     | .  | ## | ##   | 0     | 0.0   | 0.535 | 0.98, | 0.99       | 4.7                        | 2.17 .                     | SOM GT:/0:11 0/1:183,42 C   | T                          |                            |   |
| 0.005 | 0  | 0  | 0 .  | .     | .     | .     | .     | .          | .                          | .                          | DB;S GT:/0:47 0/1:80,16:3 G | A                          |                            |   |
| .     | .  | .  | .    | .     | .     | .     | .     | 1.26 .     | .                          | .                          | SOM GT:/0:16 0/1:284,59 G   | A                          |                            |   |
| .     | .  | .  | .    | .     | .     | .     | .     | .          | .                          | .                          | SOM GT:/0:46 0/1:74,8:37 A  | G                          |                            |   |
| .     | .  | ## | ##   | 0 .   | .     | .     | .     | 4.6 1.47 . | .                          | .                          | SOM GT:/0:36 0/1:64,12:3 C  | T                          |                            |   |
| .     | .  | .  | .    | .     | .     | .     | .     | 2.2 .      | .                          | .                          | SOM GT:/0:82 0/1:134,19 G   | A                          |                            |   |
| .     | .  | .  | .    | .     | .     | .     | .     | .          | .                          | .                          | SOM GT:/0:26 0/1:58,11:3 G  | A                          |                            |   |
| .     | .  | .  | .    | .     | .     | .     | .     | .          | .                          | .                          | SOM GT:/0:68 0/1:105,17 C   | T                          |                            |   |
| .     | .  | .  | .    | .     | .     | .     | .     | .          | .                          | .                          | SOM GT:/0:78 0/1:106,15 A   | G                          |                            |   |
| .     | .  | .  | .    | .     | .     | .     | .     | .          | 0 .                        | .                          | SOM GT:/0:32 0/1:54,4:37 C  | T                          |                            |   |
| .     | .  | .  | .    | .     | .     | .     | .     | 0.5:       | 0.044                      | 0.055                      | 1,N .                       | SOM GT:/0:23 0/1:48,15:3 C | A                          |   |
| .     | .  | .  | .    | .     | .     | .     | .     | 3 .        | .                          | .                          | SOM GT:/0:10 0/1:28,6:37 G  | A                          |                            |   |
| .     | .  | .  | .    | .     | .     | .     | .     | 1.26 .     | .                          | .                          | SOM GT:/0:49 0/1:64,21:3 G  | T                          |                            |   |
| 0.002 | .  | .  | .    | .     | .     | .     | .     | .          | .                          | .                          | SOM GT:/0:8,(0/1:5,3:37: C  | T                          |                            |   |
| .     | .  | ## | 0 .  | .     | .     | .     | .     | .          | .                          | .                          | SOM GT:/0:40 0/1:62,15:3 G  | A                          |                            |   |
| .     | .  | .  | .    | .     | .     | .     | .     | 1.51 .     | .                          | .                          | SOM GT:/0:17 0/1:43,8:37 G  | T                          |                            |   |
| .     | .  | .  | .    | .     | .     | .     | .     | 1.49 .     | .                          | .                          | SOM GT:/0:37 0/1:83,15:3 G  | A                          |                            |   |
| .     | .  | .  | .    | .     | .     | .     | .     | 2.5 .      | .                          | .                          | SOM GT:/0:13 0/1:38,4:37 G  | A                          |                            |   |
| .     | .  | .  | .    | .     | .     | .     | .     | 2.4 .      | .                          | .                          | SOM GT:/0:16 0/1:234,63 C   | T                          |                            |   |

|       |    |    |      |       |       |       |      |      |      |     |     |      |            |             |             |   |   |
|-------|----|----|------|-------|-------|-------|------|------|------|-----|-----|------|------------|-------------|-------------|---|---|
|       | ## | 0  | 0.0  | 0.001 | 0.006 | 1,N   | 3.5  | 1.43 |      | SOM | GT: | 0:14 | 0/1:220,38 | C           | T           |   |   |
|       | ## | 0  | 0.0  | 1.0,D | 1.0,D | 1.00  | 5.5  | 4.84 |      | SOM | GT: | 0:75 | 0/1:127,32 | C           | T           |   |   |
|       |    |    | 0.5: | 0.206 | 0.937 | 1,D   | 5.1  | 4.66 |      | 0   | SOM | GT:  | 0:74       | 0/1:92,22:  | G           | A |   |
|       |    |    |      |       |       | 1,D   | 5    | 10.3 |      |     | SOM | GT:  | 0:12       | 0/1:221,42  | C           | T |   |
|       |    |    | 0.0  | 0.001 | 0.008 | 1.00  | 2.2  | 1.43 |      |     | SOM | GT:  | 0:92       | 0/1:127,33  | C           | T |   |
|       |    |    |      |       |       |       |      |      |      |     | SOM | GT:  | 0:10       | 0/1:6,2:37: | G           | A |   |
|       |    |    |      |       |       |       |      | 3.14 |      |     | SOM | GT:  | 0:67       | 0/1:129,12  | C           | T |   |
|       |    |    |      |       |       |       |      | 2.64 |      |     | SOM | GT:  | 0:17       | 0/1:29,5:37 | G           | A |   |
|       |    |    |      |       |       |       |      |      | 0    |     | SOM | GT:  | 0:58       | 0/1:69,16:  | C           | T |   |
|       |    |    |      |       |       |       |      |      |      |     | SOM | GT:  | 0:67       | 0/1:68,18:  | G           | A |   |
|       |    |    |      |       |       |       | 2.3  |      |      |     | SOM | GT:  | 0:10       | 0/1:23,3:37 | G           | C |   |
|       | ## | 0  |      |       |       |       | 2.3  | 1.55 | 0    |     | SOM | GT:  | 0:78       | 0/1:144,31  | G           | A |   |
|       |    |    | 0.0  | 0.237 | 0.947 | 1,N   | 1.35 |      | 0    |     | SOM | GT:  | 0:79       | 0/1:129,24  | G           | A |   |
|       |    |    |      |       |       |       | 3.2  | 2.43 |      |     | SOM | GT:  | 0:86       | 0/1:130,25  | G           | A |   |
|       |    |    | 0.0  | 0.714 | 0.772 | 1.00  |      | 3.12 |      |     | SOM | GT:  | 0:57       | 0/1:75,12:  | C           | A |   |
|       |    |    |      |       |       |       |      |      |      |     | SOM | GT:  | 0:15       | 0/1:12,3:37 | G           | A |   |
|       |    |    |      |       |       |       |      |      |      |     | SOM | GT:  | 0:22       | 0/1:37,6:37 | C           | T |   |
|       |    |    |      |       |       |       | 2.3  |      |      |     | SOM | GT:  | 0:20       | 0/1:35,8:37 | A           | G |   |
|       | ## | 0  | 0.1: | 0.079 | 0.161 | 1.00  | 3.8  | 2.32 |      |     | SOM | GT:  | 0:59       | 0/1:109,27  | G           | A |   |
|       |    |    |      |       |       |       |      |      |      |     | SOM | GT:  | 0:29       | 0/1:46,13:  | C           | A |   |
| 0.002 |    | 0  | 0    |       |       |       |      |      | 0    | 0   | SOM | GT:  | 0:70       | 0/1:100,26  | C           | T |   |
|       |    |    |      |       |       |       |      |      |      |     | SOM | GT:  | 0:20       | 0/1:39,3:37 | C           | T |   |
|       |    |    |      |       |       |       | 5.8  | 4.31 |      |     | SOM | GT:  | 0:53       | 0/1:61,18:  | C           | A |   |
|       |    |    |      |       |       |       | 5.6  | 1.81 |      |     | SOM | GT:  | 0:30       | 0/1:59,9:37 | A           | C |   |
| 4E-04 |    |    |      |       |       |       |      |      |      |     | SOM | GT:  | 0:46       | 0/1:71,14:  | C           | T |   |
|       |    |    |      |       |       |       |      |      |      |     | SOM | GT:  | 0:73       | 0/1:118,20  | G           | T |   |
|       |    |    | 0.9: | 0.999 | 1.0,D | 1,D   | 4.4  | 5.13 |      |     | SOM | GT:  | 0:13       | 0/1:232,50  | G           | A |   |
|       |    |    |      |       |       |       | 3.1  |      |      |     | SOM | GT:  | 0:63       | 0/1:97,18:  | C           | T |   |
|       |    |    |      |       |       |       | 5.4  | 1.33 |      |     | SOM | GT:  | 0:30       | 0/1:38,8:37 | C           | A |   |
|       |    |    |      |       |       |       | 4.8  | 2.89 |      |     | SOM | GT:  | 0:54       | 0/1:60,23:  | C           | T |   |
|       |    |    |      |       |       |       |      |      |      |     | SOM | GT:  | 0:43       | 0/1:87,15:1 | T           | A |   |
| 0.01  |    | 0  | 0    | 0     |       |       |      |      |      |     | DB; | GT:  | 0:33       | 0/1:37,5:37 | C           | T |   |
|       | ## | 0  | 0.0  | 0.007 | 0.029 | 1,D   | 5.4  | 3.98 |      |     | SOM | GT:  | 0:12       | 0/1:215,32  | G           | A |   |
|       |    |    |      |       |       |       |      |      |      |     | SOM | GT:  | 0:52       | 0/1:87,17:  | C           | A |   |
|       |    |    |      |       |       |       | 1.80 |      |      |     | SOM | GT:  | 0:15       | 0/1:21,3:37 | C           | T |   |
|       |    |    |      |       |       |       |      |      |      |     | SOM | GT:  | 0:69       | 0/1:118,24  | C           | T |   |
|       |    |    | 0.0: | 0.955 | 0.998 | 1,N   | 3.39 |      |      |     | SOM | GT:  | 0:13       | 0/1:227,40  | C           | A |   |
| 0.013 |    |    |      |       |       |       |      |      | 0    | 0   | DB; | GT:  | 0:32       | 0/1:36,8:37 | C           | T |   |
|       |    |    |      |       |       |       | 3.1  |      |      |     | SOM | GT:  | 0:47       | 0/1:71,7:37 | A           | G |   |
| 2E-04 | ## | 0  |      |       |       |       |      |      |      |     | SOM | GT:  | 0:54       | 0/1:94,26:  | C           | T |   |
|       |    |    |      |       |       |       |      |      |      |     | SOM | GT:  | 0:66       | 0/1:54,4:37 | C           | T |   |
|       |    |    |      |       |       |       |      |      |      |     | SOM | GT:  | 0:27       | 0/1:36,10:  | C           | T |   |
|       |    |    |      |       |       |       | 2.3  |      |      |     | SOM | GT:  | 0:48       | 0/1:89,12:  | C           | T |   |
|       |    |    |      |       |       |       |      |      |      |     | SOM | GT:  | 0:8,       | 0/1:15,3:37 | C           | T |   |
|       |    |    |      |       |       |       |      |      |      |     | SOM | GT:  | 0:22       | 0/1:46,9:37 | C           | T |   |
|       |    |    | 0.4: | 0.779 | 0.98, | 1,D   | 5.2  | 4.82 |      |     | SOM | GT:  | 0:48       | 0/1:71,7:37 | G           | A |   |
|       | 0  | ## | 0    | 0.0   | 0.124 | 0.729 | 1,D  | 3.9  | 4.67 | 0   |     | SOM  | GT:        | 0:51        | 0/1:87,12:  | C | A |
|       |    | ## | 0    | 0.0   | 0.966 | 1.0,D | 1,D  | 2.8  | 3.49 | 0   |     | SOM  | GT:        | 0:48        | 0/1:74,7:37 | C | T |
|       |    |    |      |       |       |       |      |      |      |     | SOM | GT:  | 0:11       | 0/1:143,34  | C           | T |   |
|       |    |    |      |       |       |       |      |      |      |     | SOM | GT:  | 0:32       | 0/1:52,12:  | C           | T |   |
|       |    |    |      |       |       |       |      |      |      |     | SOM | GT:  | 0:43       | 0/1:110,21  | C           | T |   |
|       |    |    |      |       |       |       |      |      |      |     | SOM | GT:  | 0:12       | 0/1:14,3:37 | C           | A |   |
|       |    |    |      |       |       |       |      |      |      |     | SOM | GT:  | 0:33       | 0/1:39,10:  | C           | A |   |
|       | ## | 0  |      |       |       |       |      |      |      |     | DB; | GT:  | 0:40       | 0/1:65,12:  | C           | A |   |

|   |    |        |                 |       |       |       |           |                             |   |
|---|----|--------|-----------------|-------|-------|-------|-----------|-----------------------------|---|
| . | .  | .      | .               | .     | .     | .     | .         | SOM GT:/0:16 0/1:17,5:34 G  | A |
| . | ## | .      | .               | .     | .     | .     | .         | SOM GT:/0:54 0/1:87,11:3 C  | T |
| . | ## | 0 0.1: | 0.0010.0010.99. | 1.97. | .     | .     | .         | SOM GT:/0:89 0/1:151,15 C   | T |
| . | .  | .      | .               | .     | .     | .     | .         | SOM GT:/0:24 0/1:42,9:37 C  | A |
| . | .  | .      | .               | .     | .     | .     | .         | SOM GT:/0:26 0/1:41,4:37 G  | T |
| . | .  | .      | .               | 3.5.  | .     | .     | .         | SOM GT:/0:71 0/1:105,26 G   | C |
| . | ## | 0.     | .               | 1.40. | .     | .     | .         | DB;GT:/0:48 0/1:93,18:3 G   | A |
| . | .  | .      | .               | .     | .     | .     | .         | SOM GT:/0:15 0/1:19,3:37 T  | A |
| . | .  | .      | .               | .     | .     | .     | .         | SOM GT:/0:18 0/1:29,5:37 A  | T |
| . | .  | 0.0    | 0.979           | 0.995 | 1,D   | 5.6   | 1.99.     | SOM GT:/0:48 0/1:79,11:3 A  | C |
| . | .  | .      | .               | .     | .     | .     | .         | SOM GT:/0:10 0/1:194,33 C   | T |
| . | .  | .      | .               | .     | .     | .     | 0.        | SOM GT:/0:31 0/1:32,9:37 G  | A |
| . | .  | 0.0    | 0.996           | 1.0,D | 1,D   | 4.9   | 4.51.     | SOM GT:/0:11 0/1:197,36 C   | T |
| . | .  | .      | .               | .     | .     | .     | .         | SOM GT:/0:56 0/1:85,4:37 T  | C |
| . | .  | .      | .               | 1,A   | 3.27. | .     | .         | SOM GT:/0:19 0/1:47,10:3 C  | T |
| . | .  | .      | .               | .     | .     | .     | .         | SOM GT:/0:10 0/1:125,25 T   | C |
| . | ## | 0 0.0  | 0.676           | 0.997 | 1.00  | 4.1   | 3.60.     | SOM GT:/0:96 0/1:146,38 C   | T |
| . | .  | .      | .               | .     | .     | 5.4   | 2.78.     | SOM GT:/0:10 0/1:164,31 G   | A |
| . | .  | 0.0,   | 1.0,D           | 1.0,D | 1,D   | 5.5   | 4.45.     | SOM GT:/0:78 0/1:85,17:3 G  | T |
| . | .  | .      | .               | .     | .     | .     | .         | SOM GT:/0:76 0/1:115,24 T   | G |
| . | ## | ##     | 0 0.0:          | 0.999 | 1.0,D | 1,D   | 5.5 5.31. | SOM GT:/0:27 0/1:38,5:37 C  | T |
| . | .  | .      | .               | .     | .     | .     | 0.        | SOM GT:/0:60 0/1:72,10:3 G  | A |
| . | .  | .      | .               | .     | .     | .     | .         | SOM GT:/0:14 0/1:20,3:37 G  | T |
| . | .  | .      | .               | .     | .     | .     | .         | SOM GT:/0:17 0/1:238,44 C   | T |
| . | .  | .      | .               | .     | .     | .     | .         | SOM GT:/0:11 0/1:11,3:37 C  | T |
| . | .  | .      | .               | 2.2   | 2.04. | .     | .         | SOM GT:/0:34 0/1:59,8:35 A  | G |
| . | .  | .      | .               | .     | .     | .     | .         | SOM GT:/0:17 0/1:25,3:37 T  | G |
| . | 0  | 0.     | .               | .     | .     | .     | 0 0.1     | DB;GT:/0:72 0/1:142,8:3 T   | G |
| . | .  | .      | .               | .     | .     | .     | .         | 0 DB;GT:/0:46 0/1:68,5:37 G | C |
| . | .  | .      | .               | .     | .     | .     | .         | SOM GT:/0:12 0/1:205,37 A   | G |
| . | ## | 0.     | .               | 6.2   | 3.22. | .     | .         | SOM GT:/0:11 0/1:214,10 C   | T |
| . | .  | .      | .               | .     | .     | .     | 0.1       | DB;GT:/0:69 0/1:101,5:3 T   | A |
| . | .  | .      | .               | .     | .     | .     | .         | SOM GT:/0:48 0/1:35,6:37 C  | T |
| . | .  | .      | .               | 4.9   | 3.57. | .     | .         | SOM GT:/0:51 0/1:80,16:3 C  | T |
| . | .  | .      | .               | .     | .     | .     | .         | SOM GT:/0:13 0/1:140,36 G   | A |
| . | .  | .      | .               | .     | .     | .     | .         | SOM GT:/0:33 0/1:383,15 G   | A |
| . | .  | .      | .               | .     | .     | .     | .         | SOM GT:/0:88 0/1:153,23 C   | T |
| . | .  | .      | .               | .     | .     | .     | .         | DB;GT:/0:90 0/1:151,29 C    | T |
| . | .  | .      | .               | 1,D   | 5.5   | 10.0. | .         | SOM GT:/0:62 0/1:111,13 G   | A |
| . | .  | 0.0    | 0.997           | 0.999 | 1.00  | 6     | 3.34.     | SOM GT:/0:66 0/1:75,19:3 T  | C |
| . | .  | .      | .               | .     | .     | .     | .         | SOM GT:/0:34 0/1:530,10 G   | A |
| . | .  | .      | .               | .     | .     | .     | .         | SOM GT:/0:32 0/1:37,3:37 C  | T |
| . | .  | .      | .               | .     | .     | .     | .         | SOM GT:/0:54 0/1:74,21:3 C  | T |
| . | .  | .      | .               | .     | .     | .     | .         | SOM GT:/0:33 0/1:46,11:3 A  | G |
| . | ## | 0 0.0  | 0.249           | 0.978 | 0.99  | 3.8   | 3.72.     | SOM GT:/0:53 0/1:113,21 G   | A |
| . | .  | .      | .               | 1,D   | 4.3   | 3.54. | .         | SOM GT:/0:10 0/1:150,34 C   | A |
| . | .  | .      | .               | .     | 1.74. | .     | .         | SOM GT:/0:60 0/1:114,20 C   | T |
| . | .  | 0.0    | 0.0,B           | 0.0,B | 0.99  | 4.2   | 2.12.     | SOM GT:/0:57 0/1:87,18:3 C  | A |
| . | .  | .      | .               | 1.62. | .     | .     | .         | SOM GT:/0:23 0/1:36,5:37 C  | A |
| . | .  | .      | .               | .     | .     | .     | .         | SOM GT:/0:20 0/1:22,8:37 C  | T |
| . | .  | .      | .               | .     | .     | .     | .         | SOM GT:/0:37 0/1:40,11:3 T  | C |
| . | ## | 0 0.3  | 0.004           | 0.007 | 1,N   | .     | 0         | SOM GT:/0:70 0/1:130,27 C   | T |
| . | .  | .      | .               | .     | .     | .     | 0 0       | SOM GT:/0:12 0/1:21,3:35 A  | G |
| . | ## | 0.     | .               | .     | .     | .     | .         | SOM GT:/0:42 0/1:56,6:37 G  | A |

|       |    |    |      |       |       |       |      |          |                              |   |
|-------|----|----|------|-------|-------|-------|------|----------|------------------------------|---|
|       | ## | 0  |      |       |       |       |      |          | SOM GT:/0:30 0/1:47,11:3 C   | T |
|       |    |    | 0.0  | 0.948 | 1.0,D | 0.79  | 3.9  | 3.05     | SOM GT:/0:11 0/1:168,31 G    | A |
| 8E-04 | ## | 0  |      |       |       |       | 2.1  |          | SOM GT:/0:16 0/1:252,55 C    | T |
|       |    |    | 0.1  | 0.642 | 0.989 | 1,N   | 2.9  | 1.79     | SOM GT:/0:80 0/1:114,21 C    | A |
|       |    |    | 0.1  | 0.776 | 0.958 | 1,D   | 6.1  | 3.94     | SOM GT:/0:72 0/1:118,5:3 A   | G |
|       |    |    |      |       |       |       |      |          | SOM GT:/0:12 0/1:259,38 C    | T |
|       |    |    |      |       |       |       |      |          | SOM GT:/0:15 0/1:32,3:37 G   | A |
|       |    |    |      |       |       |       |      |          | SOM GT:/0:19 0/1:28,5:37 A   | G |
|       |    |    |      |       |       |       |      |          | SOM GT:/0:25 0/1:23,7:37 C   | T |
|       |    |    |      |       |       |       |      |          | SOM GT:/0:11 0/1:25,6:37 G   | A |
|       |    |    |      |       |       |       |      |          | SOM GT:/0:34 0/1:33,10:3 T   | G |
|       | ## | 0  |      |       |       |       |      |          | SOM GT:/0:61 0/1:111,22 C    | T |
|       |    |    |      |       |       | 1,D   | 5.4  | 3.73     | SOM GT:/0:10 0/1:187,39 C    | A |
|       |    |    |      |       |       |       |      |          | SOM GT:/0:22 0/1:30,8:37 C   | T |
|       |    |    |      |       |       |       |      |          | DB;S GT:/0:36 0/1:45,6:32 C  | T |
|       | ## |    | 0.0  | 0.829 | 0.996 | 1,D   | 4.2  | 4.18     | SOM GT:/0:45 0/1:79,20:3 C   | A |
|       | ## | 0  | 0.5  | 0.004 | 0.013 | 1,N   |      |          | SOM GT:/0:10 0/1:170,28 G    | A |
|       |    |    | 0.0  | 0.998 | 1.0,D | 0.96  | 4.8  | 4.07     | SOM GT:/0:69 0/1:103,16 G    | A |
|       | ## | 0  | 0.0  | 0.998 | 1.0,D | 1,D   | 5.6  | 4.70     | DB;S GT:/0:70 0/1:102,24 C   | T |
|       |    |    | 0.0  | 0.645 | 0.976 | 1.00  | 5.1  | 2.99     | SOM GT:/0:27 0/1:35,9:37 C   | A |
|       |    |    |      |       |       |       |      |          | SOM GT:/0:22 0/1:46,4:37 C   | T |
|       |    |    |      |       |       |       |      |          | SOM GT:/0:39 0/1:42,8:37 A   | G |
|       | ## | ## | 0    | 0.0   | 0.999 | 1.0,D | 1.00 | 4 4.09 0 | SOM GT:/0:44 0/1:84,15:3 G   | A |
|       | ## | ## |      |       |       |       | 3.4  |          | SOM GT:/0:60 0/1:101,10 C    | T |
|       | ## | ## | 0    | 1.0   | 0.011 | 0.027 | 0.97 | 2.8      | SOM GT:/0:19 0/1:299,47 G    | A |
|       |    |    |      |       |       |       | 2.55 |          | SOM GT:/0:20 0/1:32,4:37 G   | T |
|       |    |    |      |       |       |       |      |          | SOM GT:/0:16 0/1:23,4:37 C   | T |
|       |    |    |      |       |       |       |      |          | SOM GT:/0:53 0/1:84,17:3 C   | T |
|       |    |    |      |       |       |       |      |          | SOM GT:/0:30 0/1:51,14:3 T   | G |
|       |    |    |      |       |       |       |      |          | SOM GT:/0:11 0/1:14,4:34 G   | A |
|       |    |    |      |       |       |       |      |          | SOM GT:/0:60 0/1:72,16:3 T   | C |
|       |    |    |      |       |       |       |      |          | SOM GT:/0:20 0/1:46,6:37 C   | G |
|       |    |    |      |       |       |       |      |          | SOM GT:/0:26 0/1:39,8:37 T   | C |
|       |    |    |      |       |       |       |      |          | SOM GT:/0:61 0/1:130,17 C    | T |
|       |    |    | 0.2  | 0.012 | 0.102 | 1,N   | 3.19 |          | SOM GT:/0:12 0/1:178,29 C    | T |
|       |    |    | 0.0  | 1.0,D | 1.0,D | 1,D   | 6    | 3.50     | SOM GT:/0:32 0/1:52,10:3 G   | T |
|       |    |    |      |       |       |       | 2.3  |          | SOM GT:/0:57 0/1:99,22:3 A   | G |
|       |    |    |      |       |       |       |      |          | SOM GT:/0:38 0/1:66,8:37 G   | A |
|       |    |    | 0.0  | 0.691 | 0.976 | 0.98  | 3.2  | 1.82     | SOM GT:/0:13 0/1:207,37 T    | C |
|       |    |    |      |       |       |       |      |          | SOM GT:/0:57 0/1:67,9:37 G   | T |
|       | ## | 0  | 0.2  | 0.021 | 0.021 | 0.99  | 2.30 |          | SOM GT:/0:73 0/1:87,20:3 C   | T |
| 8E-04 | 0  | 0  |      |       |       |       |      |          | 0 SOM GT:/0:18 0/1:41,8:37 C | T |
|       |    |    |      |       |       | 1,D   | 6.1  | 4.56     | SOM GT:/0:54 0/1:70,11:3 C   | T |
|       |    |    |      |       |       |       | 2.6  |          | SOM GT:/0:88 0/1:125,23 C    | T |
|       | ## | 0  | 0.13 | 0.48  | 1.00  | 4.9   | 2.72 | 0        | SOM GT:/0:40 0/1:74,8:37 C   | T |
|       |    |    | 0.1  | 0.593 | 0.767 | 1.00  | 2.9  | 3.54     | SOM GT:/0:31 0/1:61,12:3 C   | A |
|       |    |    | 0.0  | 0.27  | 0.274 | 1.00  | 5.8  | 3.31     | SOM GT:/0:52 0/1:91,14:3 T   | G |
|       |    |    |      |       |       |       |      |          | SOM GT:/0:33 0/1:34,3:37 C   | T |
|       |    |    |      |       |       |       |      |          | SOM GT:/0:60 0/1:104,21 G    | A |
|       |    |    | 0.0  | 0.828 | 0.999 | 1,N   | 2.96 |          | SOM GT:/0:19 0/1:250,46 G    | A |
|       |    |    |      |       |       |       |      |          | SOM GT:/0:13 0/1:37,3:37 C   | T |
|       |    |    |      |       |       |       |      |          | SOM GT:/0:68 0/1:106,24 G    | A |
|       |    |    | 0.0  | 0.071 | 0.223 | 0.96  | 3.9  | 4.16     | SOM GT:/0:16 0/1:33,6:17 A   | T |
|       |    |    | 0.0  | 1.0,D | 1.0,D | 1,D   | 5.3  | 4.11     | SOM GT:/0:48 0/1:94,18:3 G   | A |

|       |   |    |     |       |        |       |       |       |                            |       |                            |   |
|-------|---|----|-----|-------|--------|-------|-------|-------|----------------------------|-------|----------------------------|---|
|       |   |    |     |       |        |       |       | 0.    | SOM GT:/0:26 0/1:25,6:37 C | T     |                            |   |
|       |   |    |     |       |        |       |       | 0     | SOM GT:/0:16 0/1:244,60 C  | T     |                            |   |
| 0.001 | 0 | 0  | 0.  |       |        |       |       |       | SOM GT:/0:46 0/1:94,14:3 C | T     |                            |   |
|       |   |    |     |       |        |       |       |       | SOM GT:/0:34 0/1:51,9:37 C | T     |                            |   |
|       |   |    |     |       |        | 1,D   | 6.1   | 4.95. | SOM GT:/0:30 0/1:38,13:3 C | T     |                            |   |
|       |   |    |     |       |        |       |       |       | SOM GT:/0:53 0/1:65,28:3 G | A     |                            |   |
| 0.001 | 0 | 0  | 0.  |       |        |       |       |       | SOM GT:/0:67 0/1:134,15 C  | T     |                            |   |
|       |   | ## | 0   | 0.4   | 0.992  | 1.0,D | 1.00  | 3.6   | 3.57                       | 0.    | SOM GT:/0:47 0/1:71,12:3 C | T |
|       |   | 0  | 0   | 0.    |        |       |       |       |                            |       | SOM GT:/0:30 0/1:55,9:37 G | A |
|       |   | ## | 0.  |       |        |       |       |       |                            |       | SOM GT:/0:18 0/1:323,62 G  | A |
|       |   |    | 0.0 | 0.27  | 10.617 | 1.00  | 3.9   | 3.19. |                            |       | SOM GT:/0:18 0/1:318,62 A  | G |
| 2E-04 |   | ## | 0   | 0.0   | 0.938  | 0.999 | 1,D   | 4.7   | 4.09                       | 0.    | SOM GT:/0:54 0/1:98,17:3 G | A |
|       |   |    |     |       |        |       |       |       |                            |       | SOM GT:/0:73 0/1:87,20:3 T | C |
|       |   | ## | 0   | 0.0   | 0.999  | 1.0,D | 1,D   | 4.7   | 4.78.                      |       | SOM GT:/0:33 0/1:57,6:37 G | A |
|       |   | ## | ##  | 0     | 0.0    | 0.897 | 0.998 | 1,D   | 5.5                        | 3.85. | SOM GT:/0:59 0/1:106,16 C  | T |
|       |   |    |     |       |        |       |       |       |                            |       | SOM GT:/0:46 0/1:55,20:3 G | A |
|       |   |    |     |       |        |       |       | 2.1   | 1.37.                      |       | SOM GT:/0:17 0/1:22,5:37 C | T |
| 2E-04 | 0 | ## | 0.  |       |        |       |       | 3.1   |                            |       | SOM GT:/0:28 0/1:57,6:37 C | T |
|       |   | ## | ##  | 0.    |        |       |       |       |                            |       | SOM GT:/0:95 0/1:153,26 C  | T |
|       |   |    | ##  | 0     | 0.0    | 0.999 | 1.0,D | 1,D   | 5.6                        | 3.16. | SOM GT:/0:72 0/1:149,24 C  | T |
|       |   |    |     | 0.0   | 0.997  | 1.0,D | 1,D   | 5.2   | 6.08.                      |       | SOM GT:/0:92 0/1:168,27 G  | A |
| 2E-04 |   |    |     |       |        |       |       |       |                            |       | SOM GT:/0:34 0/1:70,11:3 G | A |
|       |   | ## | 0.  |       |        |       |       |       |                            |       | SOM GT:/0:48 0/1:95,26:3 G | A |
| 2E-04 | 0 | ## | 0   | 0.2   | 0.001  | 0.002 | 0.98. |       |                            |       | SOM GT:/0:71 0/1:98,20:3 G | A |
|       |   |    |     | 0.0   | 0.008  | 0.002 | 0.77. | 2.96. |                            |       | SOM GT:/0:57 0/1:116,22 G  | A |
|       |   |    |     | 1.0   | 0.197  | 0.645 | 1,D   | 4.7   |                            |       | SOM GT:/0:87 0/1:110,13 A  | T |
|       |   |    |     |       |        |       |       | 3.    |                            |       | SOM GT:/0:11 0/1:13,3:37 G | A |
|       |   |    |     |       |        |       |       |       |                            |       | SOM GT:/0:23 0/1:37,7:37 G | A |
|       |   | ## | 0   | 0.0   | 0.987  | 0.999 | 1,D   | 5.6   | 5.41                       | 0.    | SOM GT:/0:34 0/1:64,11:3 G | A |
|       |   |    |     |       |        |       |       |       |                            |       | SOM GT:/0:17 0/1:25,4:37 G | A |
|       |   |    |     |       |        |       |       |       |                            |       | SOM GT:/0:19 0/1:32,9:37 A | G |
|       |   |    | 0.1 | 0.022 | 0.005  | 1,D   | 5.3   | 3.98. |                            |       | SOM GT:/0:50 0/1:71,14:3 C | T |
|       |   | 0  | 0.  |       |        |       |       |       |                            |       | DB;:GT:/0:46 0/1:73,13:3 C | T |
|       |   |    |     |       |        |       |       | 2.4   |                            |       | SOM GT:/0:11 0/1:16,5:37 T | G |
|       |   |    |     |       |        |       |       | 3.2   |                            |       | SOM GT:/0:41 0/1:67,8:37 T | C |
|       |   |    |     |       |        |       |       |       |                            |       | SOM GT:/0:34 0/1:30,6:37 C | A |
|       |   |    |     |       |        |       |       |       |                            |       | SOM GT:/0:27 0/1:41,9:37 C | T |
|       |   |    | 0.6 | 0.018 | 0.02,  | 0.99  | 5.6   | 1.44. |                            |       | SOM GT:/0:81 0/1:122,27 C  | A |
|       |   |    |     |       |        |       | 5.2   | 2.70. |                            |       | SOM GT:/0:39 0/1:53,13:3 T | C |
|       |   | ## |     |       |        |       |       |       |                            |       | SOM GT:/0:16 0/1:29,5:37 T | C |
|       |   | ## | 0.  |       |        |       |       |       |                            |       | SOM GT:/0:29 0/1:38,10:3 C | T |
|       |   |    |     |       |        |       |       | 2.3   | 1.51.                      |       | SOM GT:/0:21 0/1:24,5:37 T | C |
|       |   |    |     |       |        |       |       |       |                            |       | SOM GT:/0:24 0/1:42,8:37 C | T |
|       |   |    |     |       |        |       |       |       |                            |       | SOM GT:/0:16 0/1:37,4:37 A | T |
|       |   |    |     |       |        |       |       | 1.28. |                            |       | SOM GT:/0:18 0/1:43,9:37 A | C |
|       |   |    | 0.2 | 0.036 | 0.094  | 0.93  | 4.    |       |                            |       | SOM GT:/0:48 0/1:88,9:37 C | T |
|       |   |    |     |       |        |       |       |       |                            |       | SOM GT:/0:22 0/1:34,8:37 A | G |
|       |   |    |     |       |        |       |       |       |                            |       | SOM GT:/0:52 0/1:78,15:3 C | A |
|       |   |    |     |       |        |       |       |       |                            |       | SOM GT:/0:72 0/1:135,23 C  | T |
|       |   |    |     |       |        |       |       |       |                            |       | SOM GT:/0:58 0/1:95,15:3 C | A |
|       |   | ## | 0.  |       |        |       |       |       |                            |       | SOM GT:/0:95 0/1:123,31 C  | T |
|       |   |    | 0.8 | 0.163 | 0.571  | 0.95  | 4.5   |       |                            |       | SOM GT:/0:30 0/1:53,10:3 A | G |
| 2E-04 |   |    |     |       |        |       |       |       |                            |       | SOM GT:/0:25 0/1:43,3:37 G | A |
|       |   |    |     |       |        |       |       | 2.2   |                            |       | SOM GT:/0:55 0/1:71,17:3 G | A |

|       |       |             |                     |                  |          |  |         |                              |   |
|-------|-------|-------------|---------------------|------------------|----------|--|---------|------------------------------|---|
|       |       |             |                     |                  | 5        |  |         | SOMGT:/0:34 0/1:70,11:3 G    | T |
|       |       |             |                     |                  |          |  |         | SOMGT:/0:49 0/1:67,11:3 T    | C |
|       |       |             |                     |                  |          |  |         | SOMGT:/0:28 0/1:69,4:37 C    | T |
|       |       |             |                     |                  | 1.67     |  |         | SOMGT:/0:25 0/1:28,6:37 A    | C |
| 0.004 |       |             |                     |                  |          |  | 0       | SOMGT:/0:24 0/1:22,3:37 G    | A |
|       |       |             |                     |                  |          |  | 0.2 0.5 | SOMGT:/0:8,(0/1:23,12:3 G    | A |
|       |       |             |                     |                  |          |  | 0.3 0.5 | SOMGT:/0:9,(0/1:30,13:3 G    | A |
|       | 0 ##  | 0           |                     |                  | 2.1 3.65 |  |         | SOMGT:/0:16 0/1:287,50 C     | T |
|       |       |             |                     |                  | 1.49     |  |         | SOMGT:/0:18 0/1:240,52 T     | G |
|       |       |             |                     |                  |          |  |         | SOMGT:/0:18 0/1:27,7:35 T    | C |
|       |       |             |                     |                  |          |  | 0       | SOMGT:/0:8,(0/1:17,4:30 G    | A |
|       |       |             |                     |                  |          |  | 0       | SOMGT:/0:10 0/1:17,4:37 C    | A |
|       |       |             |                     |                  |          |  | 0.1 0.1 | DB;SOMGT:/0:38 0/1:71,8:37 G | A |
| 2E-04 | 0 0   |             |                     |                  | 2.3 1.39 |  |         | SOMGT:/0:63 0/1:65,7:37 G    | A |
|       |       |             |                     |                  |          |  |         | SOMGT:/0:61 0/1:102,22 A     | G |
|       | ##    | 0           |                     |                  |          |  |         | SOMGT:/0:76 0/1:115,24 C     | T |
|       |       |             |                     |                  | 3.4 1.32 |  | 0       | SOMGT:/0:43 0/1:60,17:3 C    | T |
|       |       |             |                     |                  |          |  |         | SOMGT:/0:45 0/1:84,14:3 G    | A |
| 2E-04 | 0 0   |             |                     |                  |          |  |         | SOMGT:/0:70 0/1:128,23 T     | C |
|       |       |             |                     |                  |          |  |         | SOMGT:/0:14 0/1:206,34 G     | A |
|       |       |             |                     |                  |          |  |         | SOMGT:/0:46 0/1:51,5:37 T    | C |
|       |       |             |                     |                  |          |  |         | SOMGT:/0:30 0/1:35,8:37 C    | A |
|       | ##    | 0 0.0       | 0.997 1.0,D 1,D     | 5.7 5.60         |          |  |         | SOMGT:/0:68 0/1:117,16 C     | T |
|       |       |             | 0.7 0.013 0.003 1,N |                  |          |  |         | SOMGT:/0:29 0/1:43,4:37 G    | A |
|       | ##    | 0           |                     |                  |          |  |         | SOMGT:/0:60 0/1:92,17:3 G    | A |
|       | 0 0   | 0 1.0,0.0,B | 0.002 1,N           | 2.3              |          |  |         | SOMGT:/0:27 0/1:381,68 C     | T |
|       | ##    | 0 0.0       | 0.588 0.993 0.85    | 4 2.75           |          |  |         | SOMGT:/0:42 0/1:41,12:3 C    | T |
|       |       |             |                     |                  |          |  |         | SOMGT:/0:46 0/1:83,12:3 G    | A |
|       |       |             |                     |                  |          |  |         | SOMGT:/0:18 0/1:22,5:37 A    | G |
|       |       |             | 0.0                 | 0.996 0.999 1.00 | 4.5 3.86 |  |         | SOMGT:/0:58 0/1:82,20:3 A    | G |
|       |       |             |                     |                  |          |  |         | SOMGT:/0:91 0/1:172,36 G     | A |
|       |       |             |                     |                  |          |  |         | SOMGT:/0:68 0/1:77,12:3 T    | C |
|       | ##    | 0           |                     |                  |          |  | 0       | SOMGT:/0:37 0/1:70,14:3 C    | T |
|       |       |             |                     |                  |          |  | 0       | SOMGT:/0:35 0/1:38,13:1 T    | A |
|       |       |             |                     |                  |          |  |         | SOMGT:/0:24 0/1:49,14:2 G    | A |
|       | 0 0   |             |                     |                  |          |  |         | SOMGT:/0:62 0/1:82,12:3 C    | T |
|       |       |             |                     |                  |          |  | 0.2 0   | DB;SOMGT:/0:30 0/1:40,4:37 G | C |
| 8E-04 |       |             |                     |                  |          |  | 0       | SOMGT:/0:19 0/1:38,12:3 C    | T |
|       |       |             |                     |                  |          |  |         | SOMGT:/0:9,(0/1:7,3:37 A     | G |
|       |       |             |                     |                  |          |  |         | SOMGT:/0:24 0/1:28,4:37 C    | T |
|       |       |             |                     |                  |          |  |         | SOMGT:/0:14 0/1:28,3:37 C    | A |
|       |       |             | 0.6                 | 0.474 0.976 0.99 | 5.4      |  |         | SOMGT:/0:43 0/1:87,17:3 G    | A |
|       |       |             |                     |                  | 1.25     |  |         | SOMGT:/0:10 0/1:176,28 G     | T |
|       |       |             |                     |                  |          |  |         | DB;SOMGT:/0:44 0/1:63,10:3 G | A |
|       |       |             |                     |                  |          |  | 0       | SOMGT:/0:27 0/1:41,8:35 C    | T |
|       |       |             |                     |                  | 3        |  |         | SOMGT:/0:10 0/1:15,6:24 A    | C |
|       | ##    | 0 0.0       | 1.0,D 1.0,D 1,D     | 5.1 4.07         |          |  |         | SOMGT:/0:56 0/1:85,14:3 C    | T |
|       | ## ## | 0 0.1       | 0.031 0.157 0.99    | 5.6 3.15         |          |  |         | SOMGT:/0:27 0/1:44,6:37 G    | A |
|       |       |             |                     |                  | 3.88     |  |         | SOMGT:/0:33 0/1:46,3:37 G    | T |
|       |       |             |                     |                  | 1.43     |  |         | SOMGT:/0:29 0/1:29,10:3 C    | T |
|       |       |             |                     |                  |          |  |         | SOMGT:/0:56 0/1:127,8:3 G    | A |
|       |       |             |                     |                  |          |  |         | SOMGT:/0:29 0/1:41,5:37 T    | G |
|       |       |             |                     |                  |          |  |         | SOMGT:/0:86 0/1:155,15 G     | T |
|       |       |             |                     |                  | 3.5 1.73 |  |         | SOMGT:/0:35 0/1:55,13:3 A    | G |



|               |                         |  |                        |                     |            |              |                             |   |
|---------------|-------------------------|--|------------------------|---------------------|------------|--------------|-----------------------------|---|
|               |                         |  | 1,A                    | 3.6 5.01 .          |            |              | SOMGT:/0:39 0/1:51,10:3 C   | T |
|               |                         |  |                        |                     |            |              | SOMGT:/0:21 0/1:30,4:37 T   | A |
|               |                         |  |                        |                     |            |              | SOMGT:/0:9,(0/1:14,4:37 G   | A |
|               |                         |  |                        | 3.5 1.85 .          |            |              | SOMGT:/0:32 0/1:36,6:37 T   | C |
|               |                         |  |                        | 3.87 .              |            |              | SOMGT:/0:25 0/1:44,6:37 T   | C |
|               |                         |  |                        |                     |            |              | SOMGT:/0:13 0/1:11,5:37 G   | A |
|               |                         |  |                        |                     |            |              | SOMGT:/0:10 0/1:8,3:37 A    | T |
|               |                         |  |                        |                     |            |              | SOMGT:/0:8,(0/1:3,2:37 G    | A |
|               |                         |  |                        |                     |            |              | SOMGT:/0:21 0/1:22,9:37 T   | A |
|               | 0 0 .                   |  |                        |                     |            |              | SOMGT:/0:77 0/1:107,16 C    | T |
|               | ## .                    |  | 0.0:0.876 0.998 1,D    | 6 4.95 .            |            |              | SOMGT:/0:39 0/1:62,19:3 T   | C |
|               |                         |  | 1.0, .                 | 1,N .               |            |              | SOMGT:/0:60 0/1:87,20:3 A   | G |
|               |                         |  | 0.1: .                 | 1,N 2.8 .           |            |              | SOMGT:/0:32 0/1:59,10:3 T   | C |
|               |                         |  |                        | 3.07 .              |            |              | SOMGT:/0:23 0/1:42,4:34 G   | A |
|               |                         |  |                        |                     |            |              | SOMGT:/0:80 0/1:112,20 C    | T |
|               |                         |  |                        | 5.2 4.01 .          |            |              | SOMGT:/0:35 0/1:53,5:37 G   | A |
|               |                         |  |                        | 2.39 .              |            |              | SOMGT:/0:10 0/1:152,22 G    | A |
|               |                         |  | 0.0 0.045 0.075 1,N    |                     |            |              | DB;S GT:/0:21 0/1:40,10:3 T | A |
|               |                         |  | 0.0, 1.0,D 1.0,D 1,D   | 4.12 .              |            |              | SOMGT:/0:81 0/1:98,22:3 C   | T |
|               |                         |  | 0.0:0.999 1.0,D 0.95   | 5.5 5.36 .          |            |              | SOMGT:/0:66 0/1:78,11:3 T   | C |
|               |                         |  | 0.0 0.985 0.986 1.00   | 5.4 4.37 .          |            |              | SOMGT:/0:10 0/1:156,40 G    | A |
|               |                         |  |                        |                     |            |              | SOMGT:/0:12 0/1:27,6:37 T   | A |
| 0.007 .       |                         |  |                        |                     |            | 0 0          | SOMGT:/0:74 0/1:169,37 A    | G |
|               |                         |  |                        |                     |            |              | SOMGT:/0:67 0/1:100,17 G    | A |
|               | ## 0 .                  |  |                        |                     |            |              | SOMGT:/0:64 0/1:129,22 G    | A |
| 0.002 0 0 0 . |                         |  |                        |                     |            |              | SOMGT:/0:99 0/1:152,27 G    | C |
| 0.002 .       | 0 0 0.0: .              |  | 1,D                    | 5.8 5.44 .          |            |              | SOMGT:/0:18 0/1:31,9:37 C   | A |
|               |                         |  | 0.2:0.024 0.001 1.00 . |                     |            |              | SOMGT:/0:49 0/1:117,18 G    | A |
|               |                         |  |                        |                     |            |              | SOMGT:/0:87 0/1:145,22 C    | T |
|               |                         |  |                        |                     |            |              | SOMGT:/0:57 0/1:113,13 A    | G |
|               |                         |  |                        |                     |            |              | SOMGT:/0:19 0/1:22,3:37 T   | C |
|               |                         |  |                        |                     |            |              | SOMGT:/0:35 0/1:40,15:3 G   | T |
|               |                         |  |                        |                     |            |              | SOMGT:/0:46 0/1:89,19:3 A   | T |
|               |                         |  |                        | 4.8 4.78 .          |            |              | SOMGT:/0:32 0/1:55,7:37 C   | A |
|               |                         |  |                        | 2.9 .               |            |              | SOMGT:/0:48 0/1:77,23:3 G   | T |
|               |                         |  |                        |                     |            |              | SOMGT:/0:98 0/1:179,29 G    | A |
| 2E-04 .       | 0 0 0.0 0.0,B 0.0,B 1,N |  |                        |                     |            |              | SOMGT:/0:16 0/1:25,7:37 G   | T |
|               |                         |  |                        |                     |            |              | SOMGT:/0:66 0/1:96,27:3 G   | A |
|               |                         |  |                        | 2.9 .               |            |              | SOMGT:/0:61 0/1:106,17 G    | A |
|               |                         |  |                        |                     |            |              | SOMGT:/0:67 0/1:125,18 C    | T |
|               |                         |  |                        |                     |            |              | SOMGT:/0:80 0/1:159,27 C    | T |
|               |                         |  |                        |                     |            | 0            | SOMGT:/0:66 0/1:147,23 T    | A |
|               |                         |  |                        | 0.0 0.211 0.171 1,D | 6.2 2.79 . |              | SOMGT:/0:87 0/1:142,28 C    | T |
|               |                         |  |                        |                     |            |              | DB;S GT:/0:33 0/1:27,3:37 A | T |
| 0.284 0 0 0 . |                         |  |                        |                     |            | 2.16 0.4 0.4 | DB;S GT:/0:53 0/1:78,12:3 C | T |
|               |                         |  |                        |                     |            |              | SOMGT:/0:13 0/1:218,36 G    | A |
|               |                         |  |                        |                     |            |              | SOMGT:/0:18 0/1:43,3:37 C   | A |
|               |                         |  |                        |                     |            |              | SOMGT:/0:15 0/1:25,7:37 G   | T |
|               |                         |  |                        |                     |            |              | SOMGT:/0:56 0/1:102,18 G    | A |
|               |                         |  |                        |                     |            |              | SOMGT:/0:51 0/1:91,22:3 G   | A |
|               |                         |  |                        |                     |            |              | SOMGT:/0:8,(0/1:12,4:37 C   | T |
|               |                         |  |                        |                     |            |              | SOMGT:/0:63 0/1:136,25 C    | T |
|               |                         |  |                        |                     |            |              | SOMGT:/0:37 0/1:50,14:3 C   | T |
|               |                         |  |                        | 2.8 .               |            |              | SOMGT:/0:51 0/1:92,19:3 C   | T |
|               |                         |  |                        |                     |            |              |                             |   |
|               |                         |  |                        | 0.0:0.997 1.0,D 1,D | 4.4 3.71 . |              |                             |   |

|       |    |    |     |       |       |       |      |      |      |                              |   |
|-------|----|----|-----|-------|-------|-------|------|------|------|------------------------------|---|
|       |    |    |     |       |       |       |      |      |      | SOMGT:/0:18 0/1:34,7:37 C    | T |
|       | ## | ## | 0   |       |       |       |      |      |      | SOMGT:/0:30 0/1:65,9:34 G    | A |
| 0.007 | 0  | 0  | 0   |       |       |       |      |      | 0 0  | SOMGT:/0:10 0/1:179,40 C     | T |
|       |    |    |     |       |       |       |      |      |      | SOMGT:/0:15 0/1:9,3:37 G     | T |
|       |    |    |     |       |       |       |      |      |      | SOMGT:/0:20 0/1:29,6:37 C    | T |
|       |    |    |     |       |       | 4.6   | 2.74 |      |      | SOMGT:/0:49 0/1:91,17:3 G    | A |
|       | ## | ## | 0   |       |       | 4.8   | 1.24 |      |      | SOMGT:/0:29 0/1:45,7:37 C    | T |
| 0.002 |    |    |     |       |       |       |      |      |      | SOMGT:/0:8,(0/1:14,5:37 C    | T |
|       |    |    |     |       |       | 2.21  |      |      |      | SOMGT:/0:41 0/1:53,16:3 C    | T |
|       |    |    |     |       |       | 2.5   | 1.28 |      |      | SOMGT:/0:14 0/1:32,4:37 G    | A |
|       |    |    |     |       |       |       |      |      |      | SOMGT:/0:19 0/1:38,11:3 C    | T |
|       |    |    |     |       |       | 4.1   | 2.41 |      |      | SOMGT:/0:48 0/1:85,10:3 T    | C |
|       | ## | 0  | 0.0 | 0.966 | 1.0,D | 0.99  | 5.2  | 3.90 | 0    | SOMGT:/0:27 0/1:50,6:37 C    | T |
|       |    |    |     |       |       |       | 2.23 |      |      | SOMGT:/0:21 0/1:41,4:37 C    | T |
|       |    |    | 0.0 | 0.993 | 1.0,D | 1,D   | 4.8  | 4.39 |      | SOMGT:/0:36 0/1:61,11:3 C    | T |
|       |    |    |     |       |       |       |      |      |      | SOMGT:/0:19 0/1:38,8:37 G    | A |
|       |    |    |     |       |       |       |      |      |      | SOMGT:/0:13 0/1:8,3:37 G     | A |
|       |    |    |     |       |       |       |      |      | 0 0  | SOMGT:/0:8,(0/1:15,3:37 C    | T |
|       |    |    |     |       |       |       |      |      |      | SOMGT:/0:77 0/1:139,18 G     | T |
|       |    |    |     |       |       |       |      |      |      | SOMGT:/0:16 0/1:22,3:37 C    | A |
|       |    |    | 0.0 | 0.998 | 1.0,D | 1.00  | 2.3  | 3.38 |      | SOMGT:/0:16 0/1:23,9:37 T    | A |
|       |    |    |     |       |       |       |      |      |      | SOMGT:/0:31 0/1:35,13:3 T    | C |
|       |    |    |     |       |       |       | 3.8  | 1.28 |      | SOMGT:/0:26 0/1:44,5:37 G    | T |
|       |    |    |     |       |       |       | 2.1  |      |      | SOMGT:/0:40 0/1:71,10:3 G    | A |
|       |    |    |     |       |       |       | 1.31 |      |      | SOMGT:/0:39 0/1:69,8:37 C    | T |
|       |    |    |     |       |       |       |      |      |      | SOMGT:/0:20 0/1:36,9:37 A    | G |
|       | ## | 0  |     |       |       |       |      |      |      | SOMGT:/0:22 0/1:33,11:3 A    | G |
| 2E-04 | 0  | ## | 0   | 0.3   | 0.003 | 0.003 | 1.00 | 5.4  | 1.35 | DB;SOMGT:/0:74 0/1:115,25 G  | A |
|       |    |    |     |       |       |       |      |      |      | SOMGT:/0:26 0/1:42,9:37 C    | T |
|       | ## | 0  |     |       |       |       |      |      | 0    | SOMGT:/0:62 0/1:78,22:3 C    | T |
|       |    |    |     |       |       |       |      |      |      | SOMGT:/0:45 0/1:59,13:3 G    | T |
| 4E-04 | ## | 0  | 0.5 | 0.001 | 0.002 | 1,N   |      |      | 0 0  | SOMGT:/0:17 0/1:303,57 G     | A |
| 8E-04 |    |    |     |       |       |       |      |      |      | SOMGT:/0:56 0/1:64,12:3 G    | A |
|       |    |    |     |       |       |       |      |      |      | SOMGT:/0:9,(0/1:28,4:37 T    | C |
|       | 0  | ## | 0   |       |       |       |      |      |      | SOMGT:/0:36 0/1:72,11:3 G    | A |
|       |    |    |     |       |       |       | 2.3  |      |      | SOMGT:/0:30 0/1:59,12:3 C    | T |
|       | ## | 0  |     |       |       |       |      |      |      | SOMGT:/0:63 0/1:88,14:3 G    | A |
|       |    |    |     |       |       |       |      |      |      | SOMGT:/0:49 0/1:71,13:3 G    | A |
|       | ## | 0  | 0.1 | 0.951 | 0.995 | 1,D   | 5    | 3.50 |      | SOMGT:/0:10 0/1:184,41 G     | A |
|       |    |    |     |       |       |       |      |      | 0    | SOMGT:/0:21 0/1:31,6:35 G    | A |
|       |    |    |     |       |       |       | 2    |      |      | SOMGT:/0:47 0/1:51,8:35 G    | A |
|       | 0  | 0  | 0.0 | 0.007 | 0.022 | 0.99  | 2.9  | 2.38 |      | SOMGT:/0:15 0/1:236,46 C     | T |
|       | ## | 0  |     |       |       |       |      |      | 0    | SOMGT:/0:16 0/1:280,51 G     | A |
|       | ## | ## | 0   | 1.0   | 0.09, | 0.608 | 0.98 | 3.6  |      | SOMGT:/0:64 0/1:113,24 C     | T |
|       |    |    | 0.0 | 1.0,D | 1.0,D | 1.00  | 5.3  | 3.33 |      | SOMGT:/0:10 0/1:164,33 C     | T |
| 2E-04 | ## | 0  |     |       |       |       |      |      | 0    | SOMGT:/0:12 0/1:241,50 C     | T |
|       |    |    | 0.0 | 0.816 | 0.999 | 0.99  | 2.3  | 4.32 |      | SOMGT:/0:10 0/1:141,28 G     | A |
|       |    |    |     |       |       | 1,A   | 6.60 |      |      | SOMGT:/0:12 0/1:187,42 C     | T |
|       |    |    |     |       |       |       | 2.8  |      |      | SOMGT:/0:31 0/1:55,7:37 G    | T |
|       | ## | 0  | 0.1 | 0.666 | 0.985 | 1.00  | 5.1  | 4.02 |      | SOMGT:/0:15 0/1:257,46 C     | T |
| 6E-04 | 0  | 0  | 0   |       |       |       |      |      |      | SOMGT:/0:72 0/1:85,17:3 G    | A |
|       |    |    |     |       |       |       |      |      |      | SOMGT:/0:52 0/1:90,15:3 A    | G |
|       | ## | 0  | 0.0 | 1.0,D | 1.0,D | 1,D   | 4.4  | 4.28 |      | SOMGT:/0:82 0/1:127,27 G     | A |
|       |    |    |     |       |       | 1,D   | 4.5  | 3.79 |      | DB;SOMGT:/0:26 0/1:76,7:37 A | G |

|       |  |    |    |                                |                                |  |  |   |                                |                             |   |
|-------|--|----|----|--------------------------------|--------------------------------|--|--|---|--------------------------------|-----------------------------|---|
|       |  |    |    |                                |                                |  |  |   |                                | SOM GT:/0:38 0/1:50,8:37 G  | A |
|       |  |    |    |                                |                                |  |  |   | 2.42.                          | SOM GT:/0:20 0/1:27,4:37 A  | G |
|       |  |    |    |                                |                                |  |  |   |                                | SOM GT:/0:12 0/1:230,43 C   | T |
|       |  |    |    |                                |                                |  |  |   |                                | SOM GT:/0:27 0/1:41,9:37 C  | T |
|       |  |    |    |                                |                                |  |  |   |                                | SOM GT:/0:24 0/1:26,8:37 A  | T |
|       |  |    |    |                                |                                |  |  |   | 0.1:0.997 0.999 1.00 5.6 5.03. | SOM GT:/0:66 0/1:105,19 T   | G |
|       |  |    |    |                                |                                |  |  |   | 0.9 0.373 0.58, 0.99 5.4 1.88. | SOM GT:/0:55 0/1:95,25:3 C  | T |
|       |  |    |    |                                |                                |  |  |   |                                | DB;S GT:/0:20 0/1:29,8:35 C | T |
|       |  |    |    |                                |                                |  |  |   |                                | DB;S GT:/0:36 0/1:47,5:26 T | C |
|       |  |    |    |                                |                                |  |  |   |                                | SOM GT:/0:36 0/1:47,5:27 T  | C |
|       |  |    |    |                                |                                |  |  |   |                                | SOM GT:/0:13 0/1:30,6:37 G  | A |
|       |  |    |    |                                |                                |  |  |   | 1.48.                          | SOM GT:/0:67 0/1:79,14:3 C  | A |
|       |  |    |    |                                |                                |  |  |   |                                | SOM GT:/0:61 0/1:81,20:3 G  | T |
|       |  |    |    |                                |                                |  |  |   | 4.2 2.40.                      | SOM GT:/0:54 0/1:55,12:3 G  | T |
|       |  | ## | 0  |                                |                                |  |  |   | 2.23.                          | SOM GT:/0:98 0/1:153,34 C   | T |
|       |  |    |    |                                |                                |  |  |   | 0.5:0.001 0.0,B 1,N            | SOM GT:/0:10 0/1:143,26 A   | G |
|       |  |    |    |                                |                                |  |  |   | 0.0:0.962 0.998 1.00 5.9 3.83. | SOM GT:/0:76 0/1:89,22:3 C  | T |
|       |  | ## | 0  |                                |                                |  |  |   | 2.                             | SOM GT:/0:29 0/1:37,8:33 C  | T |
|       |  |    |    |                                |                                |  |  |   | 0.3 0.156 0.575 0.90 5.        | SOM GT:/0:25 0/1:46,9:37 G  | A |
|       |  |    |    |                                |                                |  |  |   |                                | SOM GT:/0:20 0/1:26,6:37 A  | G |
|       |  |    |    |                                |                                |  |  |   |                                | SOM GT:/0:46 0/1:76,15:3 G  | T |
|       |  |    |    |                                |                                |  |  |   | 2.2 4.04 0.                    | SOM GT:/0:24 0/1:37,5:37 C  | T |
|       |  |    |    |                                |                                |  |  |   | 2.5.                           | SOM GT:/0:28 0/1:41,6:35 G  | T |
|       |  |    |    |                                |                                |  |  |   |                                | SOM GT:/0:44 0/1:92,13:3 A  | C |
|       |  |    |    |                                |                                |  |  |   |                                | SOM GT:/0:31 0/1:50,10:3 C  | A |
|       |  | ## | ## | 0                              | 0.0:0.572 0.996 1.00 5.5 4.81. |  |  |   |                                | SOM GT:/0:28 0/1:59,18:3 G  | A |
|       |  |    |    |                                |                                |  |  |   | 2.7.                           | SOM GT:/0:20 0/1:47,10:3 G  | A |
|       |  |    |    |                                |                                |  |  |   |                                | SOM GT:/0:25 0/1:60,6:37 G  | A |
|       |  |    |    |                                |                                |  |  |   | 3.2.                           | SOM GT:/0:79 0/1:121,35 C   | A |
| 4E-04 |  | 0  | 0  |                                |                                |  |  | 0 | 0                              | SOM GT:/0:55 0/1:86,13:3 G  | A |
|       |  | ## | 0  |                                |                                |  |  |   | 2.6 1.42.                      | SOM GT:/0:12 0/1:200,54 G   | A |
|       |  |    |    |                                |                                |  |  |   |                                | SOM GT:/0:26 0/1:79,15:3 A  | G |
|       |  |    |    |                                |                                |  |  |   |                                | SOM GT:/0:40 0/1:51,11:3 C  | T |
|       |  |    |    |                                |                                |  |  |   | 3.01.                          | SOM GT:/0:25 0/1:45,9:37 A  | G |
|       |  |    |    |                                |                                |  |  |   | 0.0:0.931 0.999 1,D 3.7 4.27.  | SOM GT:/0:74 0/1:110,20 G   | A |
|       |  |    |    |                                |                                |  |  |   |                                | SOM GT:/0:58 0/1:98,17:3 C  | A |
|       |  |    |    |                                |                                |  |  |   | 0.0 0.932 0.998 1,N 1.53.      | SOM GT:/0:35 0/1:53,8:33 G  | A |
|       |  |    |    |                                |                                |  |  |   |                                | SOM GT:/0:94 0/1:153,24 C   | T |
| 8E-04 |  | ## | ## | 0                              |                                |  |  |   |                                | SOM GT:/0:31 0/1:51,6:33 C  | T |
|       |  |    |    |                                |                                |  |  |   | 4.6.                           | SOM GT:/0:56 0/1:54,12:3 G  | A |
|       |  |    |    |                                |                                |  |  |   |                                | SOM GT:/0:10 0/1:14,4:37 C  | T |
| 0.048 |  | 0  | 0  | 0                              |                                |  |  | 0 | 0                              | DB;S GT:/0:20 0/1:22,4:37 A | T |
|       |  | ## | 0  | 0.1 0.021 0.102 1.00 3.9 3.82. |                                |  |  |   |                                | SOM GT:/0:31 0/1:60,8:37 C  | T |
|       |  |    |    |                                |                                |  |  |   |                                | SOM GT:/0:46 0/1:60,9:34 G  | A |
|       |  |    |    |                                |                                |  |  |   |                                | SOM GT:/0:42 0/1:48,8:37 C  | T |
|       |  | ## | 0  |                                |                                |  |  |   | 3.2.                           | SOM GT:/0:62 0/1:94,12:3 C  | T |
|       |  |    |    |                                |                                |  |  |   |                                | SOM GT:/0:9,(0/1:16,4:37 C  | A |
|       |  |    |    |                                |                                |  |  |   | 6.1 2.79.                      | SOM GT:/0:22 0/1:54,8:37 G  | A |
|       |  |    |    |                                |                                |  |  |   |                                | SOM GT:/0:98 0/1:136,21 G   | A |
|       |  |    |    |                                |                                |  |  |   |                                | SOM GT:/0:9,(0/1:14,4:37 G  | C |
| 2E-04 |  | ## | 0  | 0.0:0.999 1.0,D 1.00 6.1 4.63. |                                |  |  |   |                                | SOM GT:/0:38 0/1:51,4:37 C  | T |
|       |  |    |    |                                |                                |  |  |   |                                | SOM GT:/0:9,(0/1:12,6:37 G  | A |
|       |  |    |    |                                |                                |  |  |   | 1.54.                          | SOM GT:/0:34 0/1:49,4:37 G  | T |
|       |  | ## | 0  |                                |                                |  |  |   |                                | SOM GT:/0:47 0/1:100,23 C   | T |

|       |    |    |      |       |       |       |      |      |      |     |          |                      |                      |             |   |   |
|-------|----|----|------|-------|-------|-------|------|------|------|-----|----------|----------------------|----------------------|-------------|---|---|
| 2E-04 | .  | .  | .    | .     | .     | .     | .    | .    | 0    | SOM | GT:/0:27 | 0/1:50,11:3          | C                    | T           |   |   |
| .     | .  | .  | .    | .     | 5.6   | .     | .    | .    | .    | SOM | GT:/0:82 | 0/1:125,19           | T                    | G           |   |   |
| .     | .  | .  | 0.2: | 0.455 | 0.836 | 1.00  | 5.7  | 4.22 | .    | SOM | GT:/0:10 | 0/1:166,23           | C                    | T           |   |   |
| .     | .  | .  | .    | .     | .     | .     | .    | .    | .    | SOM | GT:/0:59 | 0/1:83,15:3          | C                    | T           |   |   |
| .     | .  | .  | .    | .     | .     | .     | .    | .    | .    | SOM | GT:/0:60 | 0/1:84,18:3          | T                    | C           |   |   |
| .     | ## | ## | 0    | 0.8:  | 0.024 | 0.083 | 1,D  | 5.1  | .    | SOM | GT:/0:63 | 0/1:66,16:3          | G                    | A           |   |   |
| .     | .  | .  | .    | .     | .     | .     | .    | .    | .    | SOM | GT:/0:39 | 0/1:63,9:34          | T                    | A           |   |   |
| .     | .  | ## | 0    | .     | .     | .     | .    | 1.48 | .    | SOM | GT:/0:54 | 0/1:65,16:3          | C                    | T           |   |   |
| .     | .  | ## | 0    | .     | .     | .     | .    | 2.5  | .    | SOM | GT:/0:33 | 0/1:51,11:3          | G                    | A           |   |   |
| .     | .  | .  | .    | .     | .     | .     | .    | .    | .    | SOM | GT:/0:24 | 0/1:57,6:37          | C                    | T           |   |   |
| .     | .  | .  | .    | .     | .     | .     | .    | .    | 0    | 0   | SOM      | GT:/0:10             | 0/1:19,4:37          | C           | T |   |
| .     | .  | .  | .    | .     | .     | .     | .    | 3.1  | .    | .   | SOM      | GT:/0:43             | 0/1:58,12:3          | C           | T |   |
| .     | .  | .  | .    | .     | .     | .     | .    | .    | .    | .   | SOM      | GT:/0:51             | 0/1:76,24:3          | C           | T |   |
| .     | .  | .  | .    | .     | .     | .     | .    | .    | 0    | .   | SOM      | GT:/0:9,(0/1:11,7:37 | G                    | A           |   |   |
| .     | .  | .  | .    | .     | .     | .     | .    | .    | 0    | 0   | DB;S     | GT:/0:75             | 0/1:132,7:3          | A           | G |   |
| .     | .  | .  | .    | .     | .     | .     | .    | .    | .    | .   | SOM      | GT:/0:8,(0/1:14,4:30 | G                    | T           |   |   |
| .     | .  | ## | 0    | 0.0:  | 0.931 | 1.0,D | 0.79 | 3.3  | 1.95 | 0   | 0        | SOM                  | GT:/0:80             | 0/1:175,35  | G | A |
| .     | .  | .  | .    | .     | .     | .     | .    | .    | .    | .   | SOM      | GT:/0:79             | 0/1:179,6:3          | C           | A |   |
| .     | .  | .  | .    | .     | .     | .     | .    | .    | .    | .   | SOM      | GT:/0:45             | 0/1:66,16:3          | C           | T |   |
| .     | .  | .  | .    | .     | .     | .     | .    | .    | 0    | .   | SOM      | GT:/0:43             | 0/1:67,5:37          | C           | T |   |
| .     | .  | .  | .    | .     | .     | .     | .    | .    | .    | .   | SOM      | GT:/0:70             | 0/1:90,18:3          | G           | A |   |
| 2E-04 | .  | .  | .    | .     | .     | .     | .    | .    | .    | .   | SOM      | GT:/0:19             | 0/1:23,5:37          | G           | A |   |
| .     | .  | .  | .    | .     | .     | .     | .    | .    | .    | .   | SOM      | GT:/0:68             | 0/1:85,30:3          | T           | C |   |
| .     | .  | .  | .    | .     | .     | .     | .    | .    | .    | .   | SOM      | GT:/0:16             | 0/1:14,5:37          | G           | A |   |
| .     | .  | .  | .    | .     | .     | .     | .    | .    | .    | .   | SOM      | GT:/0:10             | 0/1:176,29           | G           | A |   |
| .     | .  | .  | .    | .     | .     | 1,D   | .    | 3.49 | .    | .   | SOM      | GT:/0:9,(0/1:25,8:35 | C                    | T           |   |   |
| 4E-04 | 0  | 0  | 0    | .     | .     | .     | .    | .    | .    | .   | DB;S     | GT:/0:14             | 0/1:283,24           | C           | T |   |
| .     | .  | .  | .    | .     | .     | .     | .    | .    | .    | .   | SOM      | GT:/0:14             | 0/1:24,3:37          | G           | A |   |
| .     | .  | .  | .    | .     | .     | .     | .    | 1.69 | .    | .   | SOM      | GT:/0:72             | 0/1:111,17           | G           | A |   |
| .     | .  | ## | 0    | 0.2:  | 0.002 | 0.004 | 1,D  | 4.1  | 1.85 | .   | SOM      | GT:/0:35             | 0/1:62,7:37          | G           | A |   |
| 0.002 | .  | .  | 0    | .     | .     | .     | .    | .    | .    | 0   | 0        | SOM                  | GT:/0:36             | 0/1:70,10:3 | C | T |
| .     | .  | ## | 0    | .     | .     | .     | .    | .    | .    | .   | SOM      | GT:/0:12             | 0/1:211,38           | C           | T |   |
| .     | .  | .  | .    | 0.0:  | 0.997 | 1.0,D | 0.99 | 6.2  | 4.57 | .   | SOM      | GT:/0:62             | 0/1:111,19           | G           | A |   |
| .     | .  | .  | .    | 0.0:  | 0.565 | 0.959 | 0.68 | 3.7  | 1.42 | .   | SOM      | GT:/0:60             | 0/1:51,5:37          | C           | A |   |
| .     | .  | .  | .    | 0.0:  | 1.0,D | 1.0,D | 1,D  | 5.4  | 4.96 | .   | SOM      | GT:/0:59             | 0/1:88,12:3          | G           | A |   |
| .     | .  | .  | .    | .     | .     | .     | .    | .    | .    | .   | SOM      | GT:/0:31             | 0/1:43,6:32          | A           | T |   |
| .     | .  | .  | .    | 0.1:  | 0.988 | 0.994 | 0.87 | 5.6  | 3.33 | .   | SOM      | GT:/0:40             | 0/1:55,16:3          | T           | C |   |
| 0.003 | .  | .  | .    | .     | .     | .     | .    | .    | .    | 0   | 0        | SOM                  | GT:/0:8,(0/1:6,7:37: | A           | G |   |
| 2E-04 | .  | ## | 0    | .     | .     | .     | .    | 2.2  | 2.78 | .   | SOM      | GT:/0:20             | 0/1:27,9:37          | C           | T |   |
| .     | .  | .  | .    | .     | .     | .     | .    | .    | .    | .   | SOM      | GT:/0:55             | 0/1:85,15:3          | C           | T |   |
| .     | .  | .  | .    | .     | .     | .     | .    | 1.70 | .    | .   | SOM      | GT:/0:27             | 0/1:49,6:37          | G           | T |   |
| .     | .  | ## | 0    | 0.0:  | 0.988 | 0.998 | 1,D  | 5.9  | 5.07 | .   | SOM      | GT:/0:67             | 0/1:120,26           | G           | A |   |
| .     | .  | .  | .    | 0.2:  | 0.159 | 0.475 | 0.99 | 4.1  | 2.31 | .   | SOM      | GT:/0:56             | 0/1:64,12:3          | A           | T |   |
| .     | .  | .  | .    | .     | .     | .     | .    | .    | .    | .   | DB;S     | GT:/0:37             | 0/1:53,12:3          | C           | T |   |
| .     | .  | .  | .    | .     | .     | .     | .    | .    | 0.1  | 0.2 | SOM      | GT:/0:20             | 0/1:26,4:37          | C           | T |   |
| .     | .  | .  | .    | .     | .     | .     | .    | .    | 0    | .   | SOM      | GT:/0:8,(0/1:6,4:37: | C                    | T           |   |   |
| .     | .  | .  | .    | 0.1:  | 0.008 | 0.127 | 1,N  | 1.50 | .    | .   | SOM      | GT:/0:14             | 0/1:224,37           | C           | T |   |
| .     | .  | .  | .    | .     | .     | .     | .    | 1.36 | .    | .   | SOM      | GT:/0:13             | 0/1:23,4:37          | C           | T |   |
| .     | .  | .  | .    | .     | .     | .     | .    | .    | .    | .   | SOM      | GT:/0:69             | 0/1:88,14:3          | G           | C |   |
| .     | .  | .  | .    | .     | .     | .     | .    | .    | .    | .   | SOM      | GT:/0:9,(0/1:14,4:37 | C                    | A           |   |   |
| .     | .  | .  | .    | .     | .     | .     | .    | .    | .    | .   | SOM      | GT:/0:18             | 0/1:41,8:37          | G           | A |   |
| .     | .  | .  | .    | .     | .     | 1,A   | .    | 5.21 | .    | .   | SOM      | GT:/0:17             | 0/1:254,36           | C           | T |   |
| .     | .  | .  | .    | .     | .     | .     | .    | 3.8  | .    | .   | SOM      | GT:/0:30             | 0/1:40,4:37          | A           | T |   |
| .     | .  | ## | 0    | .     | .     | .     | .    | .    | .    | .   | SOM      | GT:/0:27             | 0/1:32,4:37          | C           | T |   |

|       |    |    |   |     |       |       |      |      |      |                               |                               |   |
|-------|----|----|---|-----|-------|-------|------|------|------|-------------------------------|-------------------------------|---|
|       |    |    |   |     | 1,D   | 5.6   | 4.33 |      |      | SOM GT:/0:44 0/1:79,16:3C     | T                             |   |
| 0.126 | 0  | 0  |   |     |       |       |      |      | 0    | 0 DB;:GT:/0:20 0/1:47,15:3T   | A                             |   |
|       |    |    |   |     |       |       |      |      |      | SOM GT:/0:14 0/1:12,3:37G     | T                             |   |
|       | ## | 0  | 0 | 0.0 | 1.0,D | 1.0,D | 1.00 | 3.9  | 3.90 | SOM GT:/0:49 0/1:74,10:3C     | T                             |   |
|       |    |    |   |     |       |       |      | 4.7  | 1.51 | SOM GT:/0:73 0/1:131,18 G     | T                             |   |
|       |    | ## | 0 | 0.0 | 0.998 | 1.0,D | 1.00 | 5.7  | 5.10 | SOM GT:/0:53 0/1:87,13:3C     | T                             |   |
|       |    |    |   |     |       |       |      |      | 1,A  | 8.91                          | SOM GT:/0:34 0/1:74,8:35G     | T |
|       |    |    |   |     |       |       |      |      |      | 1.24                          | SOM GT:/0:8,(0/1:14,4:37A     | G |
|       |    |    |   |     |       |       |      |      |      |                               | SOM GT:/0:30 0/1:35,4:37T     | C |
|       |    |    |   | 0.0 | 0.998 | 1.0,D | 1,D  | 5.6  | 3.37 | SOM GT:/0:12 0/1:231,37 G     | T                             |   |
|       |    |    |   |     |       |       |      | 3.9  | 3.01 | SOM GT:/0:24 0/1:38,4:37C     | A                             |   |
|       |    |    |   | 0.0 | 1.0,D | 1.0,D | 1,D  | 5.5  | 5.97 | SOM GT:/0:86 0/1:109,16 G     | A                             |   |
|       | ## | ## | 0 | 0.0 | 0.998 | 1.0,D | 1,D  | 5.4  | 5.22 | SOM GT:/0:96 0/1:131,18 C     | T                             |   |
|       |    |    |   |     |       |       |      |      |      |                               | SOM GT:/0:84 0/1:180,41 C     | T |
|       |    |    |   |     |       |       |      |      |      |                               | SOM GT:/0:15 0/1:19,3:37A     | G |
|       |    |    |   |     |       |       |      |      |      |                               | SOM GT:/0:44 0/1:46,12:3A     | G |
|       |    |    |   |     |       |       |      |      |      |                               | DB;:GT:/0:28 0/1:21,5:37A     | G |
|       |    |    |   |     |       |       |      | 1,A  | 5.8  | 7.24                          | SOM GT:/0:55 0/1:55,12:3G     | T |
|       |    |    |   | 0.0 | 0.327 | 0.627 | 1,D  | 3.9  | 2.49 | SOM GT:/0:34 0/1:67,17:3C     | A                             |   |
|       |    | ## | 0 | 0.2 | 0.014 | 0.006 | 0.64 | 4.2  | 1.72 | SOM GT:/0:67 0/1:118,23 T     | C                             |   |
|       |    |    |   | 0.0 | 0.998 | 1.0,D | 1,D  | 6    | 4.97 | SOM GT:/0:48 0/1:54,8:37G     | T                             |   |
|       |    | ## |   | 0.1 | 0.574 | 0.818 | 1.00 | 5.1  | 4.00 | SOM GT:/0:33 0/1:80,14:3A     | G                             |   |
|       |    |    |   |     |       |       |      |      |      | 0                             | 0 SOM GT:/0:10 0/1:21,4:37C   | A |
|       |    |    |   |     |       |       |      |      |      | 0                             | 0 SOM GT:/0:99 0/1:155,29 G   | A |
|       |    |    |   |     |       |       |      | 3.2  |      |                               | SOM GT:/0:47 0/1:115,27 G     | T |
|       |    |    |   |     |       |       |      | 1.27 |      |                               | SOM GT:/0:95 0/1:133,17 G     | A |
|       |    |    |   |     |       |       |      | 3.1  |      |                               | SOM GT:/0:34 0/1:66,10:3A     | G |
|       |    |    |   |     |       |       |      |      |      |                               | SOM GT:/0:36 0/1:57,10:3C     | A |
|       |    |    |   |     |       |       |      |      |      | 0                             | 0 SOM GT:/0:9,(0/1:7,3:37: T  | C |
|       | 0  | 0  |   |     |       |       |      |      |      | 0.1                           | 0 SOM GT:/0:15 0/1:26,5:37G   | A |
|       |    |    |   |     |       |       |      |      |      |                               | SOM GT:/0:12 0/1:27,6:37G     | A |
|       |    |    |   | 0.0 | 0.641 | 0.908 | 1,D  | 3.7  | 4.04 | SOM GT:/0:53 0/1:76,21:3A     | G                             |   |
|       |    |    |   |     |       |       |      |      |      |                               | SOM GT:/0:27 0/1:27,6:37C     | T |
|       |    |    |   |     |       |       |      |      |      |                               | SOM GT:/0:58 0/1:67,12:3G     | A |
|       |    | ## | 0 |     |       |       |      |      |      |                               | SOM GT:/0:58 0/1:107,21 G     | A |
|       |    |    |   |     |       |       |      |      |      |                               | SOM GT:/0:32 0/1:47,12:3A     | G |
|       |    |    |   | 0.0 | 0.596 | 0.938 | 1,N  | 2.5  |      |                               | SOM GT:/0:83 0/1:132,22 G     | A |
|       |    |    |   |     |       |       |      |      |      | 0                             | 0.1 DB;:GT:/0:45 0/1:71,4:37G | C |
|       |    |    |   |     |       |       |      |      |      |                               | SOM GT:/0:45 0/1:55,7:37C     | T |
|       |    |    |   | 0.5 | 0.0,B | 0.0,B | 1,N  |      |      |                               | SOM GT:/0:38 0/1:751,26 C     | A |
|       |    |    |   |     |       |       |      |      |      | 0                             | SOM GT:/0:39 0/1:44,3:37G     | A |
|       |    | ## | 0 | 0.1 | 0.33, | 0.728 | 1,N  | 4.9  | 3.90 | SOM GT:/0:57 0/1:71,20:3G     | A                             |   |
|       |    |    |   | 0.0 | 0.998 | 1.0,D | 1,D  | 5    | 3.70 | SOM GT:/0:11 0/1:26,7:37G     | T                             |   |
|       |    |    |   | 0.0 | 0.152 | 0.568 | 1.00 | 5.4  | 2.84 | SOM GT:/0:68 0/1:97,26:3A     | G                             |   |
| 2E-04 | 0  | 0  | 0 |     |       |       |      |      |      |                               | SOM GT:/0:70 0/1:119,25 G     | A |
| 0.261 | 0  | 0  | 1 |     |       |       |      |      | 0.5  | 0.5 DB;:GT:/0:52 0/1:74,16:3G | A                             |   |
|       |    |    |   |     |       |       |      |      |      |                               | SOM GT:/0:10 0/1:13,4:37G     | C |
|       |    | 0  | 0 |     |       |       |      |      |      |                               | SOM GT:/0:83 0/1:163,26 G     | A |
|       |    |    |   |     |       |       |      |      |      |                               | SOM GT:/0:40 0/1:72,19:3G     | A |
| 2E-04 | ## | 0  |   |     |       |       |      |      |      |                               | SOM GT:/0:73 0/1:115,17 G     | A |
|       |    |    |   |     |       |       |      |      |      |                               | SOM GT:/0:35 0/1:83,4:37G     | C |
|       |    |    |   |     |       |       |      |      |      |                               | SOM GT:/0:36 0/1:87,4:37G     | T |
|       |    |    |   |     |       |       |      |      |      |                               | DB;:GT:/0:35 0/1:82,6:37C     | T |
|       |    |    |   |     |       |       |      | 5.5  | 2.43 |                               | SOM GT:/0:49 0/1:77,5:37C     | A |

|       |    |    |    |       |       |       |        |      |      |                            |                            |   |
|-------|----|----|----|-------|-------|-------|--------|------|------|----------------------------|----------------------------|---|
|       |    |    |    |       |       |       |        |      |      | SOM GT:/0:18 0/1:23,3:37 T | A                          |   |
|       |    |    |    |       |       |       |        |      |      | SOM GT:/0:37 0/1:41,3:37 A | G                          |   |
|       |    |    |    |       |       |       |        |      |      | SOM GT:/0:46 0/1:65,10:3 G | T                          |   |
|       |    |    |    |       |       |       |        |      |      | SOM GT:/0:8,(0/1:17,3:37 T | C                          |   |
|       |    |    |    |       |       |       |        |      | 0    | SOM GT:/0:8,(0/1:22,4:37 T | C                          |   |
|       |    |    |    |       |       |       |        |      |      | SOM GT:/0:8,(0/1:22,4:37 A | G                          |   |
|       | ## | ## |    | 0.267 | 0.507 | 1.00  | 4.8    | 1.30 |      | SOM GT:/0:10 0/1:220,37 C  | T                          |   |
|       |    |    |    | 0.4   | 0.14  | 0.931 | 1,D    | 4.3  | 1.68 | SOM GT:/0:45 0/1:81,14:3 C | T                          |   |
| 2E-04 |    |    |    |       |       |       |        |      |      | SOM GT:/0:13 0/1:209,40 C  | T                          |   |
|       |    |    |    |       |       |       | 1,D    | 5.3  | 2.11 | SOM GT:/0:39 0/1:61,7:37 C | A                          |   |
|       |    |    |    |       |       |       |        |      | 2.24 | SOM GT:/0:40 0/1:63,8:37 G | A                          |   |
| 6E-04 |    |    |    |       |       |       |        | 2.2  | 0    | 0                          | SOM GT:/0:20 0/1:29,7:37 G | A |
|       |    |    |    | 0.4   | 0.001 | 0.0   | B 1,N  |      | 1.81 |                            | SOM GT:/0:12 0/1:192,41 A  | G |
| 0.001 | 0  | 0  | 0  | 0.0   | 0.436 | 0.988 | 1,N    |      | 2.82 |                            | SOM GT:/0:11 0/1:255,13 C  | T |
|       |    |    |    |       |       |       |        | 5.2  |      |                            | SOM GT:/0:53 0/1:70,7:35 C | T |
|       |    |    |    |       |       |       |        |      |      |                            | SOM GT:/0:8,(0/1:15,5:37 A | G |
|       |    |    |    |       |       |       |        |      |      | 0                          | SOM GT:/0:24 0/1:41,5:37 C | G |
|       |    |    |    |       |       |       |        | 2.9  | 1.25 |                            | SOM GT:/0:34 0/1:55,9:37 C | A |
|       |    |    |    |       |       |       |        |      |      |                            | SOM GT:/0:12 0/1:12,3:37 A | G |
|       |    |    |    |       |       |       |        |      | 3.64 |                            | SOM GT:/0:19 0/1:29,5:37 C | T |
|       |    |    |    |       |       |       |        | 3.8  |      |                            | SOM GT:/0:47 0/1:70,14:3 G | A |
|       |    |    |    |       |       |       |        | 3.8  |      |                            | SOM GT:/0:15 0/1:13,5:37 G | A |
|       | ## | ## | 0  |       |       |       |        |      |      |                            | SOM GT:/0:20 0/1:28,8:30 C | T |
|       |    |    |    |       |       |       |        |      |      | 0                          | SOM GT:/0:23 0/1:32,7:37 C | T |
|       |    |    |    | 0.5   | 0.013 | 0.04  | 1,N    | 2.1  |      |                            | SOM GT:/0:10 0/1:154,38 G  | T |
|       |    |    |    | 0.6   | 0.002 | 0.0   | B 1,N  |      |      |                            | SOM GT:/0:53 0/1:92,18:3 G | A |
|       |    | ## | 0  | 0.0   | 0.136 | 0.588 | 0.87   | 5.8  | 2.16 | 0                          | SOM GT:/0:32 0/1:53,10:3 C | T |
|       |    |    |    |       |       |       |        |      |      |                            | SOM GT:/0:25 0/1:43,5:37 C | T |
|       |    |    |    | 0.6   | 0.311 | 0.745 | 1,D    | 3.6  | 2.38 |                            | DB;GT:/0:29 0/1:48,8:37 A  | C |
| 8E-04 |    |    |    |       |       |       |        |      |      |                            | DB;GT:/0:30 0/1:21,4:37 C  | T |
|       |    |    |    |       |       |       |        |      |      |                            | SOM GT:/0:16 0/1:36,10:3 G | T |
|       |    |    |    |       |       |       |        |      |      |                            | SOM GT:/0:96 0/1:149,25 A  | G |
|       |    |    |    | 0.0   | 0.601 | 0.832 | 1,D    | 5.9  | 5.19 |                            | SOM GT:/0:43 0/1:69,8:37 C | T |
|       |    |    |    |       |       |       |        |      |      |                            | SOM GT:/0:13 0/1:12,4:37 G | T |
|       |    |    |    | 0.0   | 0.972 | 1.0   | D 0.61 | 4.2  | 4.51 |                            | SOM GT:/0:13 0/1:19,7:31 G | A |
|       |    |    |    |       |       |       |        | 4.9  |      |                            | SOM GT:/0:23 0/1:30,11:3 A | T |
|       |    | ## | 0  |       |       |       |        | 1.26 |      |                            | SOM GT:/0:57 0/1:84,17:3 C | T |
|       |    |    |    |       |       |       |        | 2.16 |      |                            | SOM GT:/0:16 0/1:21,4:37 C | T |
|       |    | ## | 0  |       |       |       |        |      |      |                            | SOM GT:/0:21 0/1:28,8:37 T | C |
|       |    | ## | 0  | 0.0   | 0.99  | 1.0   | D 0.97 | 5.4  | 3.82 | 0                          | SOM GT:/0:51 0/1:66,15:3 C | T |
|       |    |    |    | 0.0   | 0.994 | 0.999 | 1.00   | 4.7  | 3.65 |                            | SOM GT:/0:36 0/1:69,17:3 A | G |
|       |    |    |    | 1.0   | 0.0   | B 0.0 | B 1,N  |      |      |                            | DB;GT:/0:10 0/1:204,38 A   | G |
|       |    | ## | 0  | 0.1   | 0.001 | 0.003 | 1.00   | 3.6  | 1.87 |                            | SOM GT:/0:10 0/1:205,41 G  | A |
|       |    |    |    | 0.4   | 0.035 | 0.044 | 0.99   | 4.2  | 1.79 |                            | SOM GT:/0:70 0/1:103,20 T  | C |
|       |    |    |    |       |       |       |        |      |      |                            | SOM GT:/0:11 0/1:184,34 G  | A |
|       |    |    |    |       |       |       |        |      |      |                            | SOM GT:/0:16 0/1:262,49 C  | T |
|       |    | ## | 0  |       |       |       |        |      |      | 0                          | SOM GT:/0:55 0/1:84,21:3 G | A |
|       |    |    |    | 0.0   | 1.0   | D 1.0 | D 0.81 | 4.2  | 3.64 |                            | SOM GT:/0:14 0/1:241,42 G  | A |
|       |    |    |    | 0.0   | 0.941 | 0.994 | 1.00   | 4.2  | 2.91 |                            | SOM GT:/0:12 0/1:195,40 C  | T |
|       |    |    |    |       |       |       |        |      |      |                            | SOM GT:/0:65 0/1:111,27 C  | T |
|       |    |    |    | 0.0   | 0.272 | 0.479 | 1,N    | 3.4  | 2.43 |                            | SOM GT:/0:76 0/1:141,32 C  | T |
| 0.002 |    | ## | 0  |       |       |       |        |      |      | 0                          | SOM GT:/0:89 0/1:153,7:3 C | T |
|       |    | ## | ## | 0     |       |       |        |      |      |                            | SOM GT:/0:20 0/1:353,57 C  | T |
|       |    |    | ## | 0     | 0.0   | 0.875 | 0.998  | 1,D  | 4    | 3.02                       | SOM GT:/0:10 0/1:160,30 G  | A |

|       |    |    |     |       |       |        |      |      |      |      |     |          |            |           |          |     |   |
|-------|----|----|-----|-------|-------|--------|------|------|------|------|-----|----------|------------|-----------|----------|-----|---|
| 8E-04 | ## | 0  | 0.0 | 0.001 | 0.003 | 1,N    | .    | .    | 0    | 0    | SOM | GT:/0:70 | 0/1:140,30 | G         | A        |     |   |
| .     | .  | .  | .   | .     | .     | .      | .    | .    | 0    | .    | SOM | GT:/0:19 | 0/1:43,10  | 3A        | G        |     |   |
| .     | .  | .  | .   | .     | .     | .      | 2.7  | .    | .    | .    | SOM | GT:/0:24 | 0/1:25,4   | 37T       | C        |     |   |
| .     | .  | .  | .   | .     | .     | .      | .    | .    | .    | .    | SOM | GT:/0:23 | 0/1:55,15  | 3A        | T        |     |   |
| .     | .  | .  | 0.0 | 0.647 | 0.978 | 0.86   | 5.5  | 3.81 | .    | .    | SOM | GT:/0:11 | 0/1:214,52 | G         | A        |     |   |
| .     | .  | .  | 0.0 | 0.879 | 0.998 | 1,D    | 5.4  | 3.63 | .    | .    | SOM | GT:/0:63 | 0/1:100,18 | C         | A        |     |   |
| 4E-04 | .  | .  | .   | .     | .     | .      | .    | .    | 0    | 0    | SOM | GT:/0:16 | 0/1:28,6   | 37G       | A        |     |   |
| 2E-04 | 0  | 0  | 0.1 | 0.514 | 0.96  | 1,1.00 | 5.7  | 3.45 | .    | .    | SOM | GT:/0:86 | 0/1:146,25 | C         | T        |     |   |
| .     | .  | .  | 0.0 | 0.537 | 0.984 | 0.99   | 5.2  | 3.64 | .    | .    | SOM | GT:/0:29 | 0/1:75,12  | 3G        | A        |     |   |
| .     | .  | .  | 0.0 | 0.986 | 0.997 | 1.00   | 5.8  | 4.50 | .    | .    | SOM | GT:/0:91 | 0/1:142,19 | C         | A        |     |   |
| .     | 0  | ## | 0   | 0.1   | 0.281 | 0.981  | 0.99 | 4.3  | .    | .    | SOM | GT:/0:72 | 0/1:133,19 | C         | T        |     |   |
| .     | .  | ## | 0   | 0.0   | 0.999 | 1.0    | D    | 1,D  | 5.6  | 3.40 | 0   | .        | SOM        | GT:/0:48  | 0/1:65,5 | 34C | T |
| .     | .  | .  | .   | .     | .     | .      | 5.1  | .    | .    | .    | SOM | GT:/0:49 | 0/1:94,19  | 3G        | T        |     |   |
| .     | .  | .  | 0.0 | 0.075 | 0.181 | 1,D    | 5.8  | 3.16 | .    | .    | SOM | GT:/0:14 | 0/1:259,53 | T         | C        |     |   |
| 2E-04 | .  | .  | .   | .     | .     | .      | .    | .    | 0    | .    | SOM | GT:/0:14 | 0/1:11,3   | 37C       | T        |     |   |
| .     | .  | .  | .   | .     | .     | .      | .    | .    | .    | .    | SOM | GT:/0:28 | 0/1:50,7   | 37C       | A        |     |   |
| .     | .  | .  | .   | .     | .     | .      | 5.1  | 3.89 | .    | .    | SOM | GT:/0:27 | 0/1:47,4   | 37T       | C        |     |   |
| .     | .  | .  | .   | .     | .     | .      | .    | .    | .    | .    | SOM | GT:/0:12 | 0/1:213,42 | G         | A        |     |   |
| 0.003 | 0  | 0  | .   | .     | .     | .      | .    | .    | 0    | .    | DB; | GT:/0:88 | 0/1:180,36 | G         | A        |     |   |
| 4E-04 | ## | 0  | 0.0 | 0.996 | 1.0   | D      | 1,D  | 3.6  | 3.58 | .    | SOM | GT:/0:22 | 0/1:367,69 | C         | T        |     |   |
| .     | .  | .  | .   | .     | .     | .      | 3.2  | 3.75 | .    | .    | SOM | GT:/0:47 | 0/1:75,9   | 37C       | A        |     |   |
| .     | .  | .  | .   | .     | .     | .      | .    | .    | .    | .    | SOM | GT:/0:33 | 0/1:36,13  | 3C        | T        |     |   |
| .     | .  | .  | .   | .     | .     | .      | .    | .    | .    | .    | SOM | GT:/0:21 | 0/1:38,5   | 37G       | A        |     |   |
| .     | .  | .  | .   | .     | .     | .      | .    | .    | 0    | 0    | SOM | GT:/0:21 | 0/1:40,13  | 3G        | A        |     |   |
| .     | .  | .  | .   | .     | .     | .      | 3.7  | 3.15 | .    | .    | SOM | GT:/0:25 | 0/1:44,7   | 37G       | A        |     |   |
| .     | .  | .  | .   | .     | .     | .      | .    | .    | .    | .    | SOM | GT:/0:8, | 0/1:9,4    | 37G       | T        |     |   |
| .     | ## | 0  | 0.1 | 0.017 | 0.14  | 1,0.73 | 5.2  | 1.40 | 0    | .    | SOM | GT:/0:83 | 0/1:120,21 | G         | A        |     |   |
| .     | .  | .  | .   | .     | .     | .      | .    | .    | .    | .    | SOM | GT:/0:15 | 0/1:19,6   | 37A       | T        |     |   |
| 0.002 | .  | .  | .   | .     | .     | .      | .    | .    | 0    | 0    | SOM | GT:/0:33 | 0/1:54,7   | 37G       | A        |     |   |
| .     | .  | .  | .   | .     | .     | .      | .    | .    | .    | .    | SOM | GT:/0:37 | 0/1:49,8   | 37A       | G        |     |   |
| .     | ## | 0  | .   | .     | .     | .      | .    | .    | .    | .    | SOM | GT:/0:57 | 0/1:80,13  | 3C        | T        |     |   |
| .     | .  | .  | .   | .     | .     | .      | .    | .    | .    | .    | SOM | GT:/0:16 | 0/1:12,3   | 37T       | A        |     |   |
| .     | ## | ## | 0   | .     | .     | .      | .    | .    | 0    | .    | DB; | GT:/0:58 | 0/1:83,7   | 37G       | A        |     |   |
| .     | ## | 0  | 0.0 | 0.951 | 1.0   | D      | 1,D  | 5.9  | 6.16 | .    | SOM | GT:/0:90 | 0/1:144,22 | G         | A        |     |   |
| .     | ## | 0  | .   | .     | .     | .      | .    | .    | .    | .    | SOM | GT:/0:43 | 0/1:77,16  | 3C        | T        |     |   |
| .     | .  | .  | .   | .     | .     | .      | .    | .    | .    | .    | SOM | GT:/0:28 | 0/1:29,7   | 37T       | G        |     |   |
| .     | .  | .  | .   | .     | .     | .      | .    | .    | .    | .    | SOM | GT:/0:17 | 0/1:50,6   | 37C       | T        |     |   |
| .     | .  | .  | .   | .     | .     | .      | .    | .    | .    | .    | SOM | GT:/0:12 | 0/1:23,3   | 37G       | A        |     |   |
| .     | .  | .  | .   | .     | .     | .      | .    | .    | .    | .    | SOM | GT:/0:42 | 0/1:65,14  | 3T        | C        |     |   |
| .     | .  | .  | .   | .     | .     | .      | .    | .    | .    | .    | SOM | GT:/0:19 | 0/1:30,5   | 34G       | A        |     |   |
| .     | .  | .  | .   | .     | .     | .      | .    | .    | .    | .    | SOM | GT:/0:11 | 0/1:17,3   | 37C       | T        |     |   |
| .     | .  | .  | .   | .     | .     | .      | 2.64 | .    | .    | .    | SOM | GT:/0:18 | 0/1:20,3   | 33G       | A        |     |   |
| .     | .  | .  | .   | .     | .     | .      | .    | .    | .    | .    | SOM | GT:/0:20 | 0/1:50,5   | 37T       | C        |     |   |
| .     | 0  | 0  | .   | .     | .     | .      | .    | .    | .    | .    | DB; | GT:/0:20 | 0/1:34,3   | 37G       | A        |     |   |
| .     | .  | .  | .   | .     | .     | .      | .    | .    | .    | .    | SOM | GT:/0:52 | 0/1:85,7   | 35A       | G        |     |   |
| .     | .  | .  | .   | .     | .     | .      | .    | .    | .    | .    | SOM | GT:/0:57 | 0/1:91,15  | 3C        | T        |     |   |
| .     | .  | .  | .   | .     | .     | .      | .    | .    | .    | .    | SOM | GT:/0:57 | 0/1:85,17  | 3G        | T        |     |   |
| .     | .  | .  | .   | .     | .     | .      | .    | .    | .    | .    | SOM | GT:/0:59 | 0/1:98,10  | 3G        | A        |     |   |
| .     | .  | .  | .   | .     | .     | .      | .    | .    | .    | .    | SOM | GT:/0:29 | 0/1:62,11  | 3A        | G        |     |   |
| .     | ## | 0  | .   | .     | .     | .      | .    | .    | 0    | 0    | SOM | GT:/0:81 | 0/1:117,22 | C         | T        |     |   |
| .     | .  | .  | .   | .     | .     | .      | .    | .    | .    | .    | SOM | GT:/0:10 | 0/1:180,28 | G         | A        |     |   |
| .     | .  | .  | .   | .     | .     | .      | .    | .    | .    | .    | SOM | GT:/0:15 | 0/1:15,3   | 37T       | C        |     |   |
| .     | .  | .  | 0.0 | 1.0   | D     | 1.0    | D    | 1,D  | 4.2  | 4.48 | .   | DB;      | GT:/0:63   | 0/1:97,19 | 3C       | T   |   |
| .     | 0  | 0  | .   | .     | .     | .      | .    | .    | 0    | .    | SOM | GT:/0:99 | 0/1:169,26 | C         | T        |     |   |

|       |   |    |                          |          |   |                              |   |   |
|-------|---|----|--------------------------|----------|---|------------------------------|---|---|
|       |   |    | 0.01.0,D 1.0,D 1,D       | 5.7 5.41 |   | SOM GT:/0:64 0/1:116,13      | G | A |
|       |   |    | 0.0 0.973 0.996 1,D      | 3.6 2.38 |   | SOM GT:/0:68 0/1:129,23      | G | T |
|       |   | ## | 0                        | 1.66     |   | SOM GT:/0:51 0/1:76,11:3     | C | T |
|       |   |    |                          | 3.3      |   | SOM GT:/0:12 0/1:16,4:37     | C | T |
|       |   | ## | 0                        |          | 0 | SOM GT:/0:11 0/1:159,30      | C | T |
|       |   |    |                          | 1.32     |   | SOM GT:/0:40 0/1:48,8:37     | G | A |
|       |   |    |                          | 2.9 2.80 |   | SOM GT:/0:28 0/1:37,10:1     | G | C |
|       |   |    | 0.0:0.124 0.865 1,D      | 4 2.29   |   | SOM GT:/0:60 0/1:93,23:3     | G | A |
|       |   |    |                          |          |   | SOM GT:/0:84 0/1:145,25      | A | G |
|       |   |    |                          | 2.1      |   | SOM GT:/0:26 0/1:40,4:37     | C | T |
|       |   | ## | 0 0.9 0.006 0.014 1,N    |          |   | SOM GT:/0:83 0/1:132,36      | G | A |
|       |   |    | 0.0:0.687 0.991 0.70     | 4.9 1.80 |   | SOM GT:/0:96 0/1:146,30      | C | A |
| 0.005 | 0 | 0  |                          | 2.2      | 0 | 0 DB;SOM GT:/0:71 0/1:132,10 | C | A |
|       |   | ## | 0                        | 1.37     | 0 | SOM GT:/0:60 0/1:86,16:3     | C | T |
|       |   |    |                          |          |   | SOM GT:/0:84 0/1:152,29      | G | T |
| 2E-04 | 0 | ## | 0                        |          | 0 | SOM GT:/0:67 0/1:123,24      | C | T |
|       |   |    | 0.0, 1.0,D 1.0,D 1,D     | 5.9 4.56 |   | SOM GT:/0:73 0/1:107,27      | C | T |
|       |   |    |                          |          |   | SOM GT:/0:23 0/1:28,5:37     | G | T |
|       |   |    |                          |          |   | SOM GT:/0:60 0/1:111,23      | A | G |
| 4E-04 | 0 | 0  | 0                        |          |   | SOM GT:/0:40 0/1:66,11:3     | G | A |
|       | 0 | 0  | 0 0.0:0.451 0.99,1,1,N   | 2.6 2.98 |   | SOM GT:/0:10 0/1:175,38      | G | A |
|       |   |    |                          |          |   | SOM GT:/0:39 0/1:68,13:3     | G | A |
|       |   |    | 0.0:0.997 1.0,D          | 6 3.85   |   | SOM GT:/0:73 0/1:118,19      | C | A |
|       |   |    |                          |          |   | SOM GT:/0:10 0/1:200,24      | C | G |
|       |   |    |                          | 3.4      |   | SOM GT:/0:34 0/1:39,7:37     | A | G |
| 0.001 | 0 | 0  |                          |          | 0 | 0 SOM GT:/0:13 0/1:19,7:31   | A | G |
|       |   |    |                          |          | 0 | SOM GT:/0:24 0/1:32,10:1     | A | T |
|       |   |    |                          | 2.9      |   | SOM GT:/0:45 0/1:58,11:3     | C | A |
|       |   | ## | 0 0.0:0.001 0.007 0.65   | 4.8 2.89 |   | SOM GT:/0:66 0/1:76,13:3     | C | T |
| 2E-04 | 0 | ## | 0 0.0 1.0,D 1.0,D 1,D    | 3.70     |   | SOM GT:/0:82 0/1:116,30      | C | T |
|       |   |    |                          |          |   | SOM GT:/0:21 0/1:38,8:37     | T | C |
|       |   | ## | 0                        | 1.51     |   | SOM GT:/0:32 0/1:52,5:37     | G | A |
|       |   |    |                          |          |   | SOM GT:/0:12 0/1:9,3:37      | G | A |
|       |   |    |                          | 2.4 1.98 |   | SOM GT:/0:8,(0/1:13,4:37     | C | T |
|       |   |    | 0.0,0.997 0.999 1,D      | 4.5 3.86 |   | SOM GT:/0:16 0/1:242,48      | T | C |
| 2E-04 |   |    |                          |          | 0 | SOM GT:/0:65 0/1:103,20      | A | C |
|       |   |    |                          | 5.9 3.72 |   | SOM GT:/0:41 0/1:47,9:37     | T | C |
|       |   |    |                          |          |   | SOM GT:/0:28 0/1:43,6:37     | T | C |
|       |   |    |                          | 2.5 2.14 |   | SOM GT:/0:14 0/1:22,5:37     | T | C |
|       |   |    |                          |          |   | SOM GT:/0:35 0/1:31,3:37     | G | T |
|       |   |    | 0.0,0.972 1.0,D 0.99     | 5.8 3.48 |   | SOM GT:/0:70 0/1:83,13:3     | G | T |
|       |   |    |                          |          |   | SOM GT:/0:21 0/1:30,3:33     | C | T |
|       |   |    |                          |          |   | SOM GT:/0:26 0/1:41,6:37     | G | A |
|       |   |    |                          |          |   | SOM GT:/0:23 0/1:29,10:3     | T | C |
| 2E-04 | 0 | ## | 0                        |          | 0 | SOM GT:/0:54 0/1:96,13:3     | C | T |
|       |   |    |                          |          |   | SOM GT:/0:30 0/1:65,4:37     | A | C |
|       |   | ## | 0 0.0:0.998 1.0,D 1,D    | 5.8 4.37 |   | SOM GT:/0:28 0/1:54,16:3     | G | A |
|       |   |    |                          |          | 0 | SOM GT:/0:16 0/1:30,8:37     | G | A |
|       |   |    |                          |          |   | SOM GT:/0:22 0/1:19,7:37     | T | C |
|       |   |    |                          |          |   | SOM GT:/0:56 0/1:93,20:3     | T | C |
|       |   |    |                          | 2.9      |   | SOM GT:/0:73 0/1:116,24      | C | T |
| 1E-03 | 0 | 0  | 0                        | 2.9 2.40 | 0 | 0 SOM GT:/0:22 0/1:36,10:3   | G | A |
|       |   | ## | ## 0 0.0:0.362 0.935 1,D | 5.2 4.87 |   | SOM GT:/0:22 0/1:384,83      | G | A |
|       |   |    | 0.3:0.002 0.01,1,1,N     |          |   | SOM GT:/0:96 0/1:119,20      | A | G |



|       |    |    |     |       |       |       |      |      |      |     |     |      |             |            |   |   |
|-------|----|----|-----|-------|-------|-------|------|------|------|-----|-----|------|-------------|------------|---|---|
|       | ## | 0  | 0.0 | 0.986 | 1.0,D | 1,D   | 5.6  | 4.88 |      | SOM | GT: | 0:51 | 0/1:89,17:3 | C          | T |   |
|       | ## | 0  | 0.1 | 0.003 | 0.004 | 0.98  | 3.1  | 2.10 |      | SOM | GT: | 0:34 | 0/1:48,10:3 | A          | G |   |
|       |    |    | 0.0 | 0.997 | 1.0,D | 1,D   | 5.8  | 4.44 |      | SOM | GT: | 0:48 | 0/1:67,9:3  | E          | C |   |
|       |    |    |     |       |       |       |      |      |      | SOM | GT: | 0:36 | 0/1:54,8:3  | T          | C |   |
|       |    |    |     |       |       |       |      |      |      | SOM | GT: | 0:29 | 0/1:46,9:3  | T          | C |   |
|       |    |    |     |       |       |       | 2.6  | 2.16 |      | SOM | GT: | 0:20 | 0/1:49,6:3  | T          | C |   |
|       | ## | 0  |     |       |       |       |      |      |      | SOM | GT: | 0:82 | 0/1:118,17  | G          | A |   |
|       |    |    |     |       |       |       |      |      |      | SOM | GT: | 0:71 | 0/1:116,16  | T          | C |   |
|       |    |    | 0.1 | 0.115 | 0.525 | 1,D   | 4.6  | 1.33 |      | SOM | GT: | 0:24 | 0/1:39,11:3 | T          | C |   |
|       |    |    | 0.0 | 0.998 | 1.0,D | 1,D   | 4.6  | 5.20 |      | SOM | GT: | 0:53 | 0/1:68,5:3  | A          | G |   |
|       |    |    |     |       |       | 1,A   | 4.9  | 8.66 |      | SOM | GT: | 0:74 | 0/1:120,18  | C          | T |   |
|       |    |    |     |       |       |       |      |      |      | SOM | GT: | 0:10 | 0/1:173,43  | G          | A |   |
|       |    |    | 0.0 | 1.0,D | 1.0,D | 1,D   | 5.8  | 4.61 |      | SOM | GT: | 0:50 | 0/1:86,11:3 | C          | T |   |
|       |    |    |     |       |       |       |      |      | 0    | SOM | GT: | 0:92 | 0/1:148,21  | G          | A |   |
|       |    |    |     |       |       |       |      |      |      | SOM | GT: | 0:70 | 0/1:142,15  | C          | T |   |
|       |    |    |     |       |       |       |      |      |      | SOM | GT: | 0:69 | 0/1:46,7:3  | T          | C |   |
|       |    |    |     |       |       |       | 2.9  | 1.44 |      | SOM | GT: | 0:11 | 0/1:15,8:3  | T          | C |   |
|       |    |    | 0.3 | 0.968 | 0.993 | 1,D   | 4.7  |      |      | SOM | GT: | 0:57 | 0/1:74,17:3 | T          | C |   |
|       | ## | 0  |     |       |       |       | 5.7  |      |      | SOM | GT: | 0:30 | 0/1:61,12:3 | C          | T |   |
| 4E-04 | ## | ## | 0   | 0.0   | 0.04, | 0.231 | 1,N  | 3.09 |      | SOM | GT: | 0:12 | 0/1:199,43  | G          | A |   |
|       | ## | 0  |     |       |       |       |      |      | 0    | SOM | GT: | 0:14 | 0/1:224,24  | C          | T |   |
|       |    |    |     |       |       |       |      |      |      | SOM | GT: | 0:27 | 0/1:43,7:3  | T          | G |   |
|       |    |    | 0.0 | 0.959 | 0.996 | 1,D   | 5.1  | 3.79 |      | SOM | GT: | 0:10 | 0/1:155,27  | T          | A |   |
|       |    |    |     |       |       |       |      |      |      | SOM | GT: | 0:11 | 0/1:16,3:3  | T          | C |   |
|       |    |    |     |       |       |       | 3    |      |      | SOM | GT: | 0:97 | 0/1:184,36  | G          | T |   |
|       |    |    | 0.3 | 0.039 | 0.041 | 0.96  | 4.4  | 1.40 |      | SOM | GT: | 0:54 | 0/1:103,19  | C          | T |   |
|       |    |    | 0.0 | 0.097 | 0.167 | 1.00  | 5    | 3.97 |      | SOM | GT: | 0:51 | 0/1:88,17:3 | C          | T |   |
|       | ## | 0  |     |       |       |       |      |      |      | SOM | GT: | 0:90 | 0/1:134,22  | G          | A |   |
|       |    |    |     |       |       |       |      |      |      | SOM | GT: | 0:99 | 0/1:188,25  | A          | G |   |
|       |    |    |     |       |       |       |      |      |      | SOM | GT: | 0:14 | 0/1:254,51  | G          | A |   |
| 2E-04 | ## | 0  |     |       |       |       |      |      |      | SOM | GT: | 0:18 | 0/1:298,64  | G          | A |   |
|       |    |    |     |       |       |       |      |      |      | SOM | GT: | 0:52 | 0/1:100,5:3 | C          | T |   |
|       | ## |    |     |       |       |       |      |      |      | SOM | GT: | 0:68 | 0/1:89,18:3 | C          | T |   |
|       |    |    |     |       |       |       | 2.5  |      |      | SOM | GT: | 0:9, | (0/1:7,7:3  | T          | C |   |
|       |    |    |     |       |       |       | 1.40 |      |      | SOM | GT: | 0:42 | 0/1:61,18:3 | C          | T |   |
|       |    |    | 0.0 | 1.0,D | 1.0,D | 1,D   | 3.6  | 3.67 |      | SOM | GT: | 0:78 | 0/1:96,11:3 | C          | T |   |
|       |    |    | 0.1 | 0.002 | 0.0,B | 1.00  | 4.5  | 3.16 |      | SOM | GT: | 0:93 | 0/1:136,30  | C          | A |   |
|       | ## | 0  | 0.0 | 0.624 | 0.966 | 1.00  | 3.84 |      |      | SOM | GT: | 0:54 | 0/1:70,10:3 | C          | A |   |
|       |    |    |     |       |       |       |      |      |      | SOM | GT: | 0:17 | 0/1:47,11:3 | T          | G |   |
|       |    |    | 0.0 | 0.999 | 1.0,D | 1.00  | 3.2  | 3.89 |      | SOM | GT: | 0:16 | 0/1:255,56  | C          | T |   |
|       |    |    |     |       |       |       | 2.05 |      |      | SOM | GT: | 0:29 | 0/1:51,10:3 | C          | T |   |
|       | ## | 0  |     |       |       |       |      |      |      | SOM | GT: | 0:13 | 0/1:147,15  | G          | A |   |
|       |    |    |     |       |       |       |      |      | 0    | 0   | SOM | GT:  | 0:13        | 0/1:35,4:3 | T | G |
|       |    |    |     |       |       |       |      |      | 0    |     | SOM | GT:  | 0:12        | 0/1:33,3:3 | T | G |
|       |    |    | 0.5 | 0.021 | 0.011 | 1,N   |      |      |      | SOM | GT: | 0:32 | 0/1:63,15:3 | T          | C |   |
|       |    |    | 0.0 | 0.998 | 1.0,D | 1,D   | 5.7  | 4.60 |      | SOM | GT: | 0:54 | 0/1:82,10:3 | T          | G |   |
|       |    |    |     |       |       |       |      |      |      | SOM | GT: | 0:35 | 0/1:57,12:3 | T          | G |   |
|       |    |    | 0.0 | 1.0,D | 1.0,D | 1,D   | 5.6  | 3.42 |      | SOM | GT: | 0:14 | 0/1:257,48  | C          | A |   |
|       |    |    |     |       |       |       | 2.47 |      |      | SOM | GT: | 0:40 | 0/1:48,11:3 | T          | C |   |
|       | ## | 0  |     |       |       |       | 5.1  | 1.42 |      | SOM | GT: | 0:57 | 0/1:94,21:3 | C          | T |   |
|       |    |    |     |       |       |       |      |      |      | SOM | GT: | 0:35 | 0/1:47,10:3 | T          | C |   |
|       |    |    |     |       |       |       |      |      |      | SOM | GT: | 0:28 | 0/1:59,8:3  | T          | A |   |
|       | ## | ## | 0   | 0.1   | 0.095 | 0.122 | 1.00 | 5.9  | 3.45 |     | SOM | GT:  | 0:29        | 0/1:43,9:3 | T | C |
|       |    |    | 0.0 | 0.006 | 0.013 | 1,N   |      |      |      | SOM | GT: | 0:60 | 0/1:100,25  | T          | C |   |

|       |   |    |   |           |       |       |      |      |                                |                            |   |
|-------|---|----|---|-----------|-------|-------|------|------|--------------------------------|----------------------------|---|
|       |   |    |   |           |       |       |      |      | SOM GT:/0:15 0/1:19,3:37 C     | T                          |   |
|       |   |    |   |           |       |       |      |      | SOM GT:/0:31 0/1:32,6:37 G     | T                          |   |
|       |   | ## | 0 |           |       |       |      | 0 0  | SOM GT:/0:69 0/1:96,30:3 C     | T                          |   |
|       |   |    |   |           |       | 3.1   |      |      | SOM GT:/0:31 0/1:44,10:3 C     | T                          |   |
|       |   |    |   |           |       |       |      |      | SOM GT:/0:19 0/1:16,6:35 G     | A                          |   |
|       |   | ## | 0 |           |       | 4.1   | 1.68 | 0    | SOM GT:/0:58 0/1:86,18:3 C     | T                          |   |
|       |   |    |   |           |       |       |      |      | SOM GT:/0:11 0/1:142,30 G      | A                          |   |
|       |   | ## | 0 |           |       |       |      |      | SOM GT:/0:15 0/1:244,53 G      | A                          |   |
|       |   |    |   |           |       |       |      |      | SOM GT:/0:17 0/1:55,12:3 G     | A                          |   |
|       |   |    |   | 0.0,0.993 | 1.0,D | 0.96  |      | 3.31 | SOM GT:/0:17 0/1:278,43 G      | A                          |   |
| 2E-04 |   |    |   |           |       |       |      |      | DB;S GT:/0:44 0/1:71,16:3 G    | A                          |   |
|       |   |    |   |           |       |       |      |      | SOM GT:/0:46 0/1:104,11 G      | A                          |   |
|       |   |    |   |           |       |       |      |      | SOM GT:/0:11 0/1:153,40 G      | T                          |   |
|       |   | ## | 0 |           |       |       |      | 0    | SOM GT:/0:21 0/1:42,7:37 C     | T                          |   |
|       |   |    |   |           |       |       |      |      | SOM GT:/0:28 0/1:66,8:34 G     | A                          |   |
|       |   |    |   |           |       |       |      |      | SOM GT:/0:42 0/1:73,15:3 A     | C                          |   |
|       |   |    |   |           |       |       |      |      | SOM GT:/0:33 0/1:71,19:3 T     | C                          |   |
|       |   |    |   | 0.4       | 0.025 | 0.011 | 0.98 |      | SOM GT:/0:54 0/1:59,19:3 G     | A                          |   |
|       |   |    |   |           |       |       |      | 0    | SOM GT:/0:49 0/1:101,5:3 C     | T                          |   |
|       |   |    |   |           |       |       |      |      | SOM GT:/0:91 0/1:140,28 G      | T                          |   |
|       |   |    |   |           |       |       |      |      | SOM GT:/0:37 0/1:40,3:37 C     | T                          |   |
|       |   |    |   |           |       |       |      |      | SOM GT:/0:34 0/1:81,8:37 T     | G                          |   |
|       |   |    |   |           |       |       |      |      | SOM GT:/0:64 0/1:87,6:35 C     | T                          |   |
|       |   |    |   |           |       |       |      |      | SOM GT:/0:52 0/1:46,5:37 C     | T                          |   |
|       |   |    |   |           |       |       |      |      | SOM GT:/0:22 0/1:37,3:37 G     | A                          |   |
|       |   |    |   |           |       |       |      |      | SOM GT:/0:69 0/1:136,8:3 C     | T                          |   |
|       |   |    |   |           |       |       |      |      | SOM GT:/0:47 0/1:97,12:3 C     | T                          |   |
|       |   |    |   |           |       |       |      | 0    | SOM GT:/0:33 0/1:42,8:35 G     | T                          |   |
|       |   |    |   |           |       |       |      |      | SOM GT:/0:41 0/1:41,3:35 G     | A                          |   |
|       |   |    |   |           |       |       |      | 0.1  | 0.5 SOM GT:/0:9,(0/1:6,2:37):C | T                          |   |
|       |   |    |   |           |       | 2.1   |      | 0 0  | SOM GT:/0:18 0/1:30,3:37 G     | T                          |   |
|       |   |    |   |           |       | 2.1   |      |      | SOM GT:/0:18 0/1:29,3:37 G     | A                          |   |
| 0.019 |   |    |   |           |       |       |      | 0 0  | SOM GT:/0:17 0/1:40,3:37 T     | A                          |   |
|       |   | ## | 0 | 0.0       | 0.924 | 0.994 | 0.97 | 5.3  | 3.78                           | SOM GT:/0:43 0/1:76,16:3 C | T |
| 0.004 |   |    |   |           |       |       |      |      | 0                              | SOM GT:/0:9,(0/1:26,5:37 C | T |
|       |   |    |   |           |       |       |      |      |                                | SOM GT:/0:75 0/1:105,6:3 T | C |
|       |   |    |   |           |       |       |      |      |                                | SOM GT:/0:12 0/1:159,34 G  | A |
|       |   |    |   | 0.0       | 0.978 | 1.0,D | 1.00 | 3.5  | 3.09                           | SOM GT:/0:20 0/1:354,61 C  | T |
|       |   | ## | 0 | 0.2       | 0.781 | 0.994 | 0.99 | 4.8  | 2.69                           | SOM GT:/0:96 0/1:165,21 C  | T |
|       |   |    |   |           |       |       |      | 3    |                                | SOM GT:/0:49 0/1:94,4:37 G | T |
|       |   |    |   |           |       |       |      |      | 0                              | SOM GT:/0:40 0/1:51,9:37 G | A |
|       |   | ## | 0 | 0.1       | 0.996 | 1.0,D | 1.00 | 4.7  | 5.21                           | SOM GT:/0:11 0/1:152,35 G  | A |
|       |   | ## |   |           |       |       |      | 3.5  |                                | SOM GT:/0:17 0/1:306,11 T  | C |
|       |   |    |   |           |       |       |      |      |                                | SOM GT:/0:41 0/1:60,9:37 T | C |
| 0.598 |   |    |   |           |       |       |      | 0.2  | 0.1                            | SOM GT:/0:18 0/1:16,10:3 T | C |
|       |   |    |   |           |       |       |      |      | 0 0                            | SOM GT:/0:13 0/1:11,3:37 T | A |
|       |   |    |   |           |       | 5.8   | 3.77 |      |                                | SOM GT:/0:41 0/1:48,14:3 G | A |
|       |   |    |   |           |       |       |      |      |                                | SOM GT:/0:26 0/1:56,15:3 A | G |
|       |   |    |   | 0.0,0.998 | 1.0,D | 1.00  | 5.1  | 2.61 |                                | SOM GT:/0:39 0/1:46,8:37 C | A |
| 6E-04 | 0 | ## | 0 | 0.0       | 0.916 | 0.981 | 0.99 | 5.9  | 3.17                           | SOM GT:/0:35 0/1:34,4:37 G | A |
|       |   |    |   |           |       |       |      |      |                                | SOM GT:/0:10 0/1:14,6:37 G | T |
|       |   | ## | 0 | 0.0       | 0.997 | 1.0,D | 1,D  | 5.6  | 4.80                           | SOM GT:/0:87 0/1:124,22 G  | A |
|       |   |    |   |           |       |       |      |      |                                | SOM GT:/0:68 0/1:102,31 T  | G |
|       |   |    |   |           |       |       |      |      |                                | SOM GT:/0:52 0/1:76,8:35 G | A |

|       |  |    |    |       |                |            |           |      |      |                               |   |
|-------|--|----|----|-------|----------------|------------|-----------|------|------|-------------------------------|---|
|       |  |    |    |       | 1,D            | 5.5        | 4.26      |      |      | SOM GT:/0:98 0/1:166,34 G     | T |
|       |  | ## | 0  |       |                |            |           |      |      | SOM GT:/0:42 0/1:65,8:37 C    | T |
|       |  | ## | 0  | 0.0   | 0.7010.99E     | 1,D        | 6         | 4.93 | 0    | SOM GT:/0:33 0/1:61,8:37 C    | T |
|       |  |    |    |       |                |            |           |      |      | SOM GT:/0:30 0/1:45,9:37 C    | T |
|       |  |    |    |       |                |            |           |      |      | SOM GT:/0:44 0/1:66,11:3 G    | A |
|       |  | ## | 0  | 0.0   | 0.61,0.975     | 1.00       | 3.1       | 4.07 |      | SOM GT:/0:90 0/1:147,24 G     | A |
|       |  |    |    |       |                |            | 3.1       |      |      | SOM GT:/0:11 0/1:178,46 C     | T |
|       |  | 0  | 0  |       |                |            |           |      |      | SOM GT:/0:89 0/1:921,27 C     | T |
|       |  |    |    |       |                |            |           |      |      | SOM GT:/0:10 0/1:24,3:37 G    | A |
|       |  |    |    | 0.0   | 0.99E          | 1.0,D      | 1,D       | 4.4  | 4.77 | SOM GT:/0:13 0/1:202,34 G     | A |
|       |  | 0  | 0  |       |                |            |           |      |      | SOM GT:/0:97 0/1:64,10:3 C    | T |
|       |  |    |    |       |                |            |           |      |      | SOM GT:/0:41 0/1:43,3:37 T    | C |
|       |  |    |    | 0.0   | 1.0,D          | 1.0,D      | 1,D       | 3.7  | 3.79 | SOM GT:/0:34 0/1:74,14:3 C    | T |
|       |  |    |    | 0.0   | 0.7470.99E     | 1.00       | 5.7       | 3.34 |      | SOM GT:/0:43 0/1:59,8:37 G    | A |
|       |  |    |    |       |                |            |           |      |      | SOM GT:/0:75 0/1:121,24 T     | C |
|       |  |    |    |       |                |            |           |      |      | SOM GT:/0:23 0/1:39,5:31 G    | A |
|       |  |    |    |       |                |            |           |      |      | SOM GT:/0:25 0/1:37,11:3 G    | A |
| 0.001 |  |    |    |       |                |            |           |      |      | SOM GT:/0:32 0/1:37,4:37 C    | T |
|       |  |    |    |       |                |            |           |      |      | SOM GT:/0:48 0/1:72,12:3 G    | A |
|       |  | ## | ## | 0     | 0.0            | 0.8610.98E | 0.99      | 5.5  | 4.90 | SOM GT:/0:10 0/1:151,46 C     | T |
|       |  |    |    |       |                |            |           | 2.8  | 2.65 | SOM GT:/0:16 0/1:19,5:34 T    | A |
|       |  |    |    | 0.0   | 0.9770.99E     | 1.00       | 4.9       | 3.01 |      | SOM GT:/0:74 0/1:119,22 G     | T |
| 2E-04 |  | ## | 0  |       |                |            |           |      |      | SOM GT:/0:14 0/1:235,36 C     | T |
|       |  |    |    |       |                |            |           |      |      | SOM GT:/0:64 0/1:98,12:3 G    | T |
|       |  | ## | ## | 0     | 0.0            | 0.84E      | 0.9970.98 | 4    | 3.66 | SOM GT:/0:91 0/1:174,27 G     | A |
|       |  |    |    |       |                |            |           |      |      | SOM GT:/0:52 0/1:97,13:3 C    | A |
|       |  |    |    |       |                |            |           |      |      | DB;S GT:/0:51 0/1:61,10:2 G   | A |
|       |  |    |    | 1.0   | 0.0040.0010.99 |            |           |      |      | SOM GT:/0:52 0/1:102,16 A     | G |
|       |  |    |    | 0.6   | 0.0020.0011,N  |            |           |      |      | SOM GT:/0:16 0/1:40,7:37 C    | T |
| 0.002 |  | ## | 0  |       |                |            |           |      |      | SOM GT:/0:18 0/1:27,10:3 G    | A |
|       |  |    |    |       |                |            |           | 2.3  | 3.13 | SOM GT:/0:29 0/1:43,7:37 T    | C |
|       |  |    |    |       |                |            |           |      |      | SOM GT:/0:64 0/1:88,15:3 C    | T |
|       |  |    |    |       |                |            |           | 1.64 |      | SOM GT:/0:40 0/1:80,14:3 C    | T |
|       |  | ## | 0  | 0.0   | 0.2170.93E     | 1.00       | 5.6       | 3.26 |      | SOM GT:/0:32 0/1:46,6:37 C    | T |
|       |  |    |    | 0.1   |                |            |           | 5    |      | SOM GT:/0:34 0/1:60,10:3 C    | T |
|       |  |    |    |       |                |            |           |      |      | SOM GT:/0:20 0/1:387,61 C     | A |
|       |  |    |    |       |                |            |           |      |      | SOM GT:/0:15 0/1:235,47 C     | T |
|       |  |    |    |       |                |            |           |      |      | SOM GT:/0:12 0/1:191,10 C     | T |
|       |  | 0  | 0  |       |                |            |           |      |      | SOM GT:/0:13 0/1:16,4:37 C    | T |
|       |  |    |    |       |                |            |           |      |      | SOM GT:/0:26 0/1:66,16:3 G    | A |
|       |  | 0  | 0  | 0     |                |            |           |      | 0    | SOM GT:/0:51 0/1:75,19:3 G    | A |
|       |  | ## | 0  |       |                |            |           |      |      | SOM GT:/0:57 0/1:84,11:3 C    | T |
| 0.003 |  |    |    |       |                |            |           |      | 0    | 0 DB;S GT:/0:27 0/1:60,16:3 C | T |
| 4E-04 |  | 0  | 0  | 0     | 0.99E          | 1.0,D      | 3.7       |      |      | SOM GT:/0:11 0/1:190,37 G     | A |
|       |  |    |    |       |                |            |           |      |      | SOM GT:/0:62 0/1:100,12 T     | G |
|       |  |    |    |       |                |            |           |      |      | SOM GT:/0:68 0/1:100,18 A     | G |
|       |  |    |    | 0.283 | 0.68,0.1       |            | 5.3       | 1.29 |      | SOM GT:/0:65 0/1:104,16 C     | T |
|       |  |    |    | 0.0   | 0.997          | 1.0,D      | 1,D       | 4.6  | 5.06 | SOM GT:/0:99 0/1:151,36 C     | T |
|       |  |    |    | 0.1   | 0.0150.2970.99 |            | 4.8       | 4.97 |      | SOM GT:/0:24 0/1:41,6:32 C    | T |
|       |  |    |    |       |                |            |           |      |      | SOM GT:/0:35 0/1:60,7:29 C    | T |
|       |  |    |    |       |                |            |           |      |      | SOM GT:/0:18 0/1:41,6:37 C    | T |
|       |  | ## | ## | 0     | 0.4            | 0.0020.003 | 1,N       | 1.38 |      | SOM GT:/0:36 0/1:65,5:37 C    | T |
|       |  |    |    |       |                |            |           |      |      | SOM GT:/0:35 0/1:47,6:35 G    | C |
|       |  |    |    |       |                |            |           |      |      | SOM GT:/0:21 0/1:35,4:37 G    | A |

|       |      |         |                |                  |           |           |   |         |                            |   |
|-------|------|---------|----------------|------------------|-----------|-----------|---|---------|----------------------------|---|
| .     | .    | .       | .              | .                | .         | .         | . | .       | SOM GT:/0:37 0/1:47,5:34 G | T |
| .     | .    | .       | .              | .                | .         | .         | . | .       | SOM GT:/0:8,(0/1:19,4:37 G | A |
| .     | .    | .       | .              | .                | .         | .         | . | .       | SOM GT:/0:11 0/1:5,2:37: T | A |
| .     | .    | .       | .              | .                | .         | 1.63.     | . | .       | SOM GT:/0:47 0/1:80,10:3 C | T |
| .     | .    | .       | .              | .                | .         | .         | . | .       | SOM GT:/0:10 0/1:143,29 C  | T |
| .     | .    | .       | .              | .                | .         | 1.65.     | . | .       | SOM GT:/0:84 0/1:127,25 T  | A |
| .     | 0    | 0       | 0.             | .                | .         | .         | . | .       | SOM GT:/0:12 0/1:173,36 G  | A |
| .     | .    | .       | .              | .                | .         | .         | . | .       | SOM GT:/0:57 0/1:72,22:3 C | A |
| .     | .    | 0       | 0.             | .                | .         | .         | . | .       | SOM GT:/0:16 0/1:252,36 T  | C |
| .     | .    | .       | .              | .                | .         | .         | . | 0.      | SOM GT:/0:14 0/1:20,4:37 C | T |
| .     | .    | ##      | 0.             | .                | .         | 3.3.      | . | .       | SOM GT:/0:10 0/1:176,26 C  | T |
| .     | .    | ##      | 0 0.0          | 0.0540.487 1,N   | .         | 3.36.     | . | .       | SOM GT:/0:68 0/1:107,11 G  | A |
| .     | .    | .       | .              | .                | .         | 1,D 4.7.  | . | .       | SOM GT:/0:90 0/1:148,34 G  | A |
| .     | .    | .       | .              | .                | .         | .         | . | .       | SOM GT:/0:39 0/1:59,7:37 C | T |
| .     | .    | ##      | 0.             | .                | .         | .         | . | 0.      | SOM GT:/0:92 0/1:111,13 C  | T |
| .     | .    | .       | .              | .                | .         | .         | . | .       | SOM GT:/0:25 0/1:31,10:3 C | T |
| .     | .    | .       | .              | .                | .         | .         | . | .       | SOM GT:/0:53 0/1:85,36:3 C | T |
| 0.244 | .    | .       | .              | .                | .         | .         | . | 0.3 0.5 | SOM GT:/0:9,(0/1:5,9:37: A | G |
| .     | .    | .       | .              | .                | .         | .         | . | .       | SOM GT:/0:21 0/1:27,3:37 A | T |
| .     | .    | .       | .              | .                | .         | .         | . | .       | SOM GT:/0:12 0/1:28,3:37 G | A |
| .     | .    | .       | 0.9            | 0.972 0.981 1.00 | 5.6 2.25. | .         | . | .       | SOM GT:/0:40 0/1:65,9:37 T | C |
| .     | .    | .       | .              | .                | .         | .         | . | .       | SOM GT:/0:11 0/1:8,5:37: A | G |
| .     | .    | .       | .              | .                | .         | .         | . | 0 0     | SOM GT:/0:11 0/1:9,5:32: G | A |
| .     | .    | .       | .              | .                | .         | .         | . | .       | SOM GT:/0:47 0/1:70,17:3 C | T |
| .     | .    | .       | .              | .                | .         | .         | . | .       | SOM GT:/0:43 0/1:83,18:3 G | T |
| .     | .    | .       | .              | .                | .         | 4 2.52.   | . | .       | SOM GT:/0:17 0/1:40,7:37 C | A |
| .     | .    | .       | .              | .                | .         | .         | . | .       | SOM GT:/0:91 0/1:182,30 G  | T |
| .     | 0    | 0.      | .              | .                | .         | .         | . | .       | SOM GT:/0:85 0/1:157,26 C  | T |
| 2E-04 | 0    | 0.      | .              | .                | .         | .         | . | .       | SOM GT:/0:43 0/1:58,9:37 G | A |
| .     | .    | .       | .              | .                | .         | .         | . | 0.      | SOM GT:/0:23 0/1:32,9:37 G | A |
| .     | ##   | 0 0 0.2 | 0.0010.002 1,N | .                | .         | .         | . | .       | DB;GT:/0:85 0/1:185,32 C   | T |
| .     | .    | .       | .              | .                | .         | .         | . | .       | SOM GT:/0:68 0/1:119,24 G  | A |
| .     | 0 ## | 0.      | .              | .                | 1,A       | 5.79.     | . | .       | SOM GT:/0:64 0/1:101,19 G  | A |
| 0.031 | 0    | 0 0 0.  | .              | .                | .         | .         | . | .       | DB;GT:/0:76 0/1:140,29 G   | A |
| .     | ##   | 0.      | .              | .                | .         | .         | . | 0       | SOM GT:/0:18 0/1:48,7:37 C | T |
| .     | .    | .       | .              | .                | .         | .         | . | .       | SOM GT:/0:20 0/1:13,4:37 C | T |
| .     | ##   | 0.      | .              | .                | .         | .         | . | .       | SOM GT:/0:44 0/1:47,10:3 G | A |
| .     | .    | .       | .              | .                | .         | 5.6 1.92. | . | .       | SOM GT:/0:57 0/1:94,14:3 C | T |
| .     | ##   | 0 0.0   | 0.9940.999 1,D | 3.7 3.34.        | .         | .         | . | .       | SOM GT:/0:36 0/1:65,10:3 G | A |
| .     | .    | .       | .              | .                | .         | 3.3.      | . | .       | SOM GT:/0:27 0/1:18,6:37 T | C |
| .     | .    | .       | .              | .                | .         | .         | . | .       | SOM GT:/0:22 0/1:30,5:37 C | T |
| .     | 0 ## | 0 0.0   | .              | .                | 1.00.     | 2.48.     | . | .       | SOM GT:/0:51 0/1:99,16:3 G | A |
| .     | 0    | 0.      | .              | .                | .         | .         | . | 0       | SOM GT:/0:23 0/1:34,8:35 G | A |
| .     | .    | .       | .              | .                | .         | .         | . | .       | SOM GT:/0:12 0/1:58,4:37 G | A |
| .     | .    | .       | .              | .                | .         | .         | . | .       | SOM GT:/0:12 0/1:87,4:37 T | G |
| .     | .    | .       | .              | .                | .         | .         | . | 0.      | SOM GT:/0:13 0/1:94,10:3 T | C |
| .     | .    | .       | .              | .                | .         | .         | . | .       | SOM GT:/0:12 0/1:98,5:37 A | C |
| .     | .    | .       | .              | .                | .         | .         | . | .       | SOM GT:/0:27 0/1:377,12 A  | C |
| .     | .    | .       | .              | .                | .         | .         | . | .       | SOM GT:/0:14 0/1:62,5:37 G | A |
| .     | .    | .       | .              | .                | .         | .         | . | 0.      | DB;GT:/0:35 0/1:267,13 C   | G |
| .     | .    | .       | 0.7            | 0.0610.097 0.99  | 5.2.      | .         | . | .       | SOM GT:/0:35 0/1:62,5:34 G | T |
| .     | .    | .       | .              | .                | .         | 2.5.      | . | .       | SOM GT:/0:30 0/1:38,7:37 T | C |
| .     | .    | .       | .              | .                | .         | .         | . | .       | SOM GT:/0:15 0/1:23,4:37 A | G |
| .     | .    | .       | .              | .                | .         | .         | . | .       | SOM GT:/0:23 0/1:40,4:37 C | T |

|       |   |    |                  |            |           |           |           |                            |   |
|-------|---|----|------------------|------------|-----------|-----------|-----------|----------------------------|---|
|       |   |    |                  |            | 4.9 4.20. |           |           | SOM GT:/0:36 0/1:52,6:37 G | A |
|       |   |    |                  |            | 1.75.     |           |           | SOM GT:/0:16 0/1:20,3:37 T | A |
|       |   | ## | 0.               |            |           |           |           | SOM GT:/0:26 0/1:40,6:37 G | A |
| 4E-04 | 0 | 0  | 0.               |            | 2.3.      |           | 0         | SOM GT:/0:55 0/1:86,19:3 C | T |
|       |   |    |                  |            |           |           |           | SOM GT:/0:10 0/1:18,4:34 G | A |
|       |   |    |                  |            | 2.7.      |           |           | SOM GT:/0:30 0/1:62,10:3 A | G |
|       |   |    |                  |            |           |           |           | SOM GT:/0:24 0/1:51,10:3 G | T |
|       |   | ## | 0.               |            |           |           |           | SOM GT:/0:25 0/1:50,6:37 G | A |
|       |   |    |                  |            | 4.1.      |           |           | SOM GT:/0:27 0/1:52,9:37 G | A |
|       |   |    |                  |            |           |           |           | SOM GT:/0:8,(0/1:12,3:37 C | T |
|       |   |    |                  |            |           |           |           | SOM GT:/0:21 0/1:32,3:37 T | C |
|       |   |    |                  |            |           |           |           | SOM GT:/0:81 0/1:117,12 T  | C |
|       |   |    |                  |            |           |           |           | SOM GT:/0:33 0/1:64,16:3 G | A |
|       |   |    |                  |            |           |           |           | SOM GT:/0:62 0/1:82,11:3 C | T |
|       |   | ## | 0 0.0,1.0,D      | 1.0,D      | 1,D       | 5 5.17.   |           | SOM GT:/0:78 0/1:127,19 G  | A |
|       |   |    | 0.0 0.9410.997   | 1,D        | 5.9 5.77. |           |           | SOM GT:/0:69 0/1:114,5:3 G | A |
|       |   |    |                  |            |           |           |           | SOM GT:/0:36 0/1:70,8:37 T | C |
|       |   |    |                  |            |           |           | 0.        | SOM GT:/0:17 0/1:21,4:37 G | A |
|       |   |    |                  |            |           |           |           | SOM GT:/0:36 0/1:48,6:37 T | C |
|       |   |    |                  |            |           |           |           | SOM GT:/0:12 0/1:15,4:37 T | A |
|       |   |    |                  |            |           |           |           | SOM GT:/0:31 0/1:38,7:37 G | A |
|       |   |    |                  |            |           |           |           | SOM GT:/0:32 0/1:38,5:37 G | A |
|       |   |    |                  |            | 2.6 1.45. |           |           | SOM GT:/0:19 0/1:18,6:37 C | T |
|       |   |    | 0.0 0.255 0.898  | 0.68       | 4.8 3.48. |           |           | SOM GT:/0:10 0/1:157,39 C  | T |
| 6E-04 | 0 | 0  | 0 0.1 0.0370.108 | 1.00       | 3.1 1.59  | 0.        |           | SOM GT:/0:61 0/1:111,25 C  | T |
|       |   |    |                  |            |           |           |           | SOM GT:/0:50 0/1:67,11:3 A | G |
|       |   |    |                  |            |           |           |           | SOM GT:/0:8,(0/1:11,3:37 C | T |
|       |   |    |                  |            |           |           |           | SOM GT:/0:42 0/1:57,13:3 C | T |
| 0.017 | 0 | 0  | 0.               |            |           |           |           | DB;GT:/0:65 0/1:79,15:3 G  | A |
| 0.011 |   | 0. | 0.1 0.0020.014   | 1,P        | 1.51      | 0.        |           | DB;GT:/0:10 0/1:152,20 G   | A |
|       |   |    |                  |            |           |           |           | SOM GT:/0:22 0/1:42,5:37 G | T |
|       |   |    |                  |            |           |           |           | SOM GT:/0:19 0/1:30,5:37 C | T |
|       |   |    |                  |            | 1.36.     |           |           | SOM GT:/0:71 0/1:84,5:34 C | A |
|       |   |    |                  |            |           |           |           | SOM GT:/0:29 0/1:39,7:35 C | A |
|       |   |    |                  |            |           |           | 0         | SOM GT:/0:31 0/1:53,12:3 C | T |
|       |   |    |                  |            |           |           |           | SOM GT:/0:60 0/1:131,5:3 G | T |
|       |   | ## | 0.               | 0.008      | 0.166     | 1,N       |           | SOM GT:/0:87 0/1:123,10 C  | T |
| 2E-04 |   | ## | 0.               |            |           |           |           | SOM GT:/0:48 0/1:62,21:3 G | A |
|       |   |    | 0.0              | 0.034      | 0.278     | 0.98      | 4 1.69.   | SOM GT:/0:68 0/1:119,14 G  | T |
|       |   | ## | 0                | 1.0,0.001  | 0.004     | 1.00      | 3.3.      | SOM GT:/0:21 0/1:36,8:29 C | T |
|       |   |    | 0.4 0.862        | 0.998      | 1.00      | 3.8 3.69. |           | SOM GT:/0:67 0/1:145,22 C  | T |
|       |   |    | 0.119            | 0.389      | 1.00.     |           |           | SOM GT:/0:18 0/1:328,65 G  | A |
| 1E-03 | 0 | 0  | 0 0.3 0.001      | 0.0,B      | 0.99.     | 1.25.     |           | SOM GT:/0:15 0/1:238,43 G  | A |
| 0.002 |   |    |                  |            |           |           | 0.        | SOM GT:/0:17 0/1:26,7:37 C | T |
|       |   |    |                  |            | 1,D       | 3.6 2.41. |           | SOM GT:/0:75 0/1:172,31 C  | T |
|       |   |    | 0.0              | 0.981      | 1.0,D     | 1.00      | 5.2 3.52. | SOM GT:/0:42 0/1:66,9:37 G | A |
|       |   | 0  | 0 0.2 0.001      | 0.002      | 1,N       | 1.50.     |           | SOM GT:/0:70 0/1:150,29 G  | A |
| 0.278 |   | 0  | 0.               |            |           |           | 0 0       | SOM GT:/0:9,(0/1:17,4:37 A | G |
|       |   |    |                  |            |           |           |           | SOM GT:/0:19 0/1:31,3:37 C | T |
|       |   |    | 0.0 0.075        | 0.101      | 1,D       | 6.2 3.93. |           | SOM GT:/0:84 0/1:161,22 C  | A |
|       |   | ## | 0.               |            |           |           |           | SOM GT:/0:58 0/1:65,18:3 G | A |
|       |   |    | 0.1 0.269        | 0.57, 0.95 | 3.1 2.96. |           |           | SOM GT:/0:62 0/1:108,15 C  | T |
|       |   | ## | 0 0.0 0.93,      | 1.0,D      | 1.00      | 6 5.23.   |           | SOM GT:/0:60 0/1:87,11:3 C | T |
|       |   |    |                  |            |           |           |           | SOM GT:/0:18 0/1:36,5:37 C | T |

|       |    |   |                        |               |       |                            |   |
|-------|----|---|------------------------|---------------|-------|----------------------------|---|
|       |    |   | 0.0,1.0,D 1.0,D 1,D    | 5.9 3.74.     |       | SOM GT:/0:63 0/1:121,20 G  | A |
|       | ## | 0 | 0.0,0.988 1.0,D 0.99   | 5.2 4.81.     |       | SOM GT:/0:29 0/1:45,8:37 G | A |
|       |    |   |                        |               |       | SOM GT:/0:26 0/1:48,8:35 G | A |
|       | ## | 0 |                        | 1.41.         |       | SOM GT:/0:71 0/1:96,20:3 C | T |
|       |    |   |                        |               |       | SOM GT:/0:26 0/1:38,5:34 G | A |
|       | 0  | 0 |                        |               | 0.    | SOM GT:/0:63 0/1:117,22 C  | T |
|       |    |   |                        |               |       | SOM GT:/0:23 0/1:50,9:37 G | A |
|       |    |   | 0.0,1.0,D 1.0,D 1,D    | 5.3 4.47.     |       | SOM GT:/0:12 0/1:197,31 C  | T |
|       |    |   | 0.1,0.022 0.024 1,D    | 5.9 2.74.     |       | SOM GT:/0:15 0/1:216,42 G  | A |
|       |    |   |                        | 1,D 5.5 13.0. |       | SOM GT:/0:95 0/1:178,38 G  | A |
|       |    |   |                        |               | 0.    | SOM GT:/0:12 0/1:29,5:37 A | G |
|       |    |   |                        |               |       | SOM GT:/0:10 0/1:2,6:37 G  | C |
|       |    |   |                        |               |       | SOM GT:/0:8,(0/1:2,3:37 C  | T |
|       |    |   |                        |               |       | SOM GT:/0:65 0/1:137,16 C  | T |
|       | 0  | 0 |                        |               | 0 0   | SOM GT:/0:13 0/1:32,3:37 C | T |
|       |    |   |                        |               | 0 0.2 | SOM GT:/0:9,(0/1:12,3:37 G | A |
|       |    |   |                        |               |       | SOM GT:/0:9,(0/1:11,3:37 G | C |
|       |    |   |                        |               | 0.    | SOM GT:/0:11 0/1:31,3:37 A | G |
|       |    |   |                        |               |       | SOM GT:/0:36 0/1:46,8:37 A | C |
|       |    |   | 0.0:0.041 0.745 1,N    |               |       | SOM GT:/0:13 0/1:176,17 G  | A |
|       | ## | 0 | 0.0,0.001 0.003 1.00.  |               |       | SOM GT:/0:25 0/1:23,4:37 G | A |
|       |    |   |                        |               |       | SOM GT:/0:10 0/1:10,4:37 G | T |
|       |    |   |                        | 3.5.          |       | SOM GT:/0:93 0/1:155,27 G  | T |
|       |    |   |                        | 3.7.          |       | SOM GT:/0:23 0/1:19,5:31 C | A |
|       |    |   |                        |               |       | SOM GT:/0:36 0/1:52,8:37 T | C |
|       |    |   |                        | 1.82.         |       | SOM GT:/0:70 0/1:126,28 G  | A |
|       |    |   |                        |               |       | SOM GT:/0:17 0/1:30,6:37 A | G |
| 2E-04 | ## | 0 | 1.0,0.002 0.019 1,N    |               |       | SOM GT:/0:10 0/1:126,23 G  | A |
|       |    |   |                        |               |       | SOM GT:/0:26 0/1:53,10:3 G | A |
|       | 0  | 0 |                        | 4.6.          |       | SOM GT:/0:26 0/1:54,17:3 A | G |
|       |    |   |                        |               |       | SOM GT:/0:31 0/1:62,10:3 G | A |
|       |    |   | 0.0,1.0,D 1.0,D 1,D    | 5.7 4.59.     |       | SOM GT:/0:46 0/1:99,11:3 C | T |
|       |    |   |                        |               |       | SOM GT:/0:13 0/1:202,38 C  | T |
| 8E-04 | 0  | 0 | 0.                     |               |       | SOM GT:/0:63 0/1:106,22 C  | T |
|       |    |   |                        |               |       | SOM GT:/0:19 0/1:24,9:37 C | T |
|       |    |   |                        |               |       | SOM GT:/0:36 0/1:72,16:3 A | G |
| 4E-04 | 0  | 0 | 0.3,0.0,B 0.006 1,N    | 1.43.         |       | SOM GT:/0:14 0/1:262,46 G  | A |
|       |    |   |                        |               | 0 0   | SOM GT:/0:12 0/1:17,3:37 A | G |
|       |    |   |                        | 6.1 2.42.     |       | SOM GT:/0:23 0/1:33,4:37 A | G |
|       |    |   | 0.4,0.001 0.0,B 1,N    | 4.4.          |       | SOM GT:/0:52 0/1:83,9:37 C | T |
| 6E-04 |    |   |                        |               | 0 0   | SOM GT:/0:35 0/1:47,10:3 C | T |
| 2E-04 | ## | 0 | 0.0,0.487 0.977 0.89   | 2.2 3.05.     |       | SOM GT:/0:94 0/1:177,11 C  | T |
| 6E-04 |    |   |                        |               | 0 0   | SOM GT:/0:78 0/1:123,27 G  | A |
|       |    |   |                        |               |       | SOM GT:/0:11 0/1:18,4:37 G | A |
|       |    |   |                        | 1.27.         |       | SOM GT:/0:24 0/1:39,8:37 A | G |
|       |    |   | 0.0,0.264 0.918 0.99   | 5.1 3.26.     |       | SOM GT:/0:86 0/1:144,35 C  | T |
|       | ## | 0 | 0.3,0.018 0.023 0.99   | 5.8.          |       | SOM GT:/0:10 0/1:173,32 C  | T |
|       |    |   |                        |               |       | SOM GT:/0:12 0/1:24,4:34 G | T |
|       |    |   |                        |               |       | SOM GT:/0:69 0/1:173,13 G  | T |
|       |    |   |                        | 2.8.          |       | SOM GT:/0:82 0/1:151,29 C  | T |
|       |    |   |                        | 2.8.          |       | SOM GT:/0:73 0/1:102,14 C  | T |
| 4E-04 |    |   |                        |               | 0 0   | SOM GT:/0:90 0/1:137,26 C  | T |
|       |    |   |                        |               |       | SOM GT:/0:19 0/1:19,4:37 C | A |
|       |    |   | 0.1,0.008 0.02,1 1.00. |               |       | SOM GT:/0:48 0/1:105,16 G  | A |

|       |    |      |       |       |      |      |       |     |     |     |          |             |             |   |   |
|-------|----|------|-------|-------|------|------|-------|-----|-----|-----|----------|-------------|-------------|---|---|
| 1E-03 | .  | .    | .     | .     | .    | .    | .     | .   | 0.  | SOM | GT:/0:17 | 0/1:23,9:37 | C           | T |   |
|       | ## | 0.   | .     | .     | .    | .    | .     | .   | .   | SOM | GT:/0:35 | 0/1:61,13:3 | C           | T |   |
|       |    |      |       |       |      |      |       |     |     | SOM | GT:/0:16 | 0/1:25,4:37 | A           | G |   |
|       | ## | 0.   | .     | .     | .    | .    | .     | .   | .   | SOM | GT:/0:56 | 0/1:118,16  | C           | T |   |
|       |    | 0.0! | 0.982 | 0.995 | 1,D  | 5.2  | 4.96. | .   | .   | SOM | GT:/0:69 | 0/1:114,15  | G           | T |   |
|       |    |      |       |       |      |      |       |     |     | SOM | GT:/0:36 | 0/1:56,9:37 | C           | A |   |
|       |    |      |       |       |      |      |       |     |     | SOM | GT:/0:8, | 0/1:13,5:37 | C           | T |   |
|       |    |      |       |       |      |      |       |     |     | SOM | GT:/0:69 | 0/1:113,19  | T           | C |   |
|       |    |      |       |       |      |      |       |     |     | SOM | GT:/0:64 | 0/1:137,5:3 | C           | T |   |
|       | ## | 0.   | .     | .     | .    | .    | .     | .   | 0   | 0   | SOM      | GT:/0:67    | 0/1:120,5:3 | C | T |
|       | ## | 0.7! | 0.38  | 0.86, | 1,D  | 5.5  | 3.10  | 0.  | .   | SOM | GT:/0:59 | 0/1:105,25  | G           | A |   |
|       |    |      |       |       |      |      |       |     |     | SOM | GT:/0:68 | 0/1:120,9:3 | C           | A |   |
|       | ## | 0.2! | 0.00  | 0.00  | 1.00 | 2.8  | .     | 0.  | .   | SOM | GT:/0:11 | 0/1:186,30  | C           | T |   |
|       |    |      |       |       |      |      |       |     |     | SOM | GT:/0:52 | 0/1:103,20  | C           | T |   |
|       | ## | 0.   | .     | .     | .    | 4.8  | .     | .   | .   | SOM | GT:/0:63 | 0/1:125,25  | C           | T |   |
|       | ## | ##   | 0.0!  | 0.99  | 1,D  | 6    | 4.62  | 0.  | .   | SOM | GT:/0:57 | 0/1:100,15  | G           | A |   |
|       |    |      | 0.0,  | 0.98  | 1,D  | 4.9  | 4.69. | .   | .   | SOM | GT:/0:82 | 0/1:117,19  | C           | T |   |
|       |    |      |       |       |      | 2.4  | 2.14. | .   | .   | SOM | GT:/0:94 | 0/1:163,31  | T           | C |   |
|       |    |      |       |       |      |      |       |     |     | SOM | GT:/0:98 | 0/1:152,32  | C           | T |   |
| 0.005 |    |      |       |       |      |      |       |     | 0.  | DB; | GT:/0:41 | 0/1:57,8:3  | C           | T |   |
|       |    |      |       |       |      |      |       |     | 0   | 0   | DB;      | GT:/0:23    | 0/1:28,6:37 | T | C |
|       |    |      |       |       |      |      |       |     | 0   | 0   | DB;      | GT:/0:21    | 0/1:27,5:2  | C | T |
|       | ## | 0.7! | 0.00  | 0.00  | 1.00 | 2.06 | .     | .   | .   | SOM | GT:/0:56 | 0/1:117,24  | G           | A |   |
|       |    |      |       |       |      |      |       |     |     | SOM | GT:/0:64 | 0/1:103,25  | G           | A |   |
|       |    | 0.1! | 0.01  | 0.03  | 1.00 | .    | .     | .   | .   | SOM | GT:/0:96 | 0/1:133,42  | G           | A |   |
|       |    |      |       |       |      |      |       |     |     | SOM | GT:/0:85 | 0/1:150,24  | C           | T |   |
|       |    |      |       |       |      |      |       |     |     | SOM | GT:/0:80 | 0/1:171,29  | C           | T |   |
|       |    | 0.1! | 0.01  | 0.04  | 1,N  | 3    | 3.01. | .   | .   | SOM | GT:/0:10 | 0/1:210,10  | C           | T |   |
| 0.087 | 0  | .    | .     | .     | .    | .    | .     | 0.1 | 0.1 | DB; | GT:/0:35 | 0/1:34,8:37 | G           | A |   |
|       |    |      |       |       |      |      |       |     |     | SOM | GT:/0:47 | 0/1:85,13:3 | G           | A |   |
|       |    | 0.4! | 0.6,P | 0.94, | 1,N  | 3.02 | .     | .   | .   | SOM | GT:/0:46 | 0/1:73,22:3 | C           | T |   |
|       |    | 0.3! | 0.01  | 0.04  | 1,N  | 2.7  | .     | .   | .   | SOM | GT:/0:18 | 0/1:16,6:3  | A           | G |   |
|       |    |      |       |       |      |      |       |     |     | SOM | GT:/0:58 | 0/1:112,14  | G           | T |   |
|       | ## | 0.8! | 0.00  | 0.01  | 1,D  | .    | .     | 0.  | .   | SOM | GT:/0:10 | 0/1:178,31  | G           | A |   |
|       | 0  | 0.9! | 0.00  | 0.00  | 0.88 | 3.7  | .     | .   | .   | SOM | GT:/0:71 | 0/1:139,23  | C           | T |   |
|       |    | 0.1! | 0.47  | 0.38  | 1,N  | .    | .     | .   | .   | SOM | GT:/0:68 | 0/1:111,18  | G           | T |   |
|       |    | 0.0! | 0.98  | 1.0,D | 0.98 | 4.5  | 1.94. | .   | .   | SOM | GT:/0:15 | 0/1:200,41  | C           | T |   |
| 2E-04 | 0  | 0    | 0.    | .     | .    | .    | .     | .   | .   | DB; | GT:/0:67 | 0/1:125,26  | C           | T |   |
|       |    |      |       |       |      |      |       |     |     | SOM | GT:/0:61 | 0/1:123,20  | G           | A |   |
|       | ## | 0.0! | 0.97  | 0.99  | 0.99 | 4    | 3.94. | .   | .   | SOM | GT:/0:43 | 0/1:106,18  | C           | T |   |
|       |    |      |       |       |      |      |       |     |     | SOM | GT:/0:63 | 0/1:136,24  | C           | A |   |
|       |    |      |       |       |      | 1.39 | .     | .   | .   | DB; | GT:/0:56 | 0/1:86,8:37 | C           | T |   |
|       |    | 0.0! | 0.99  | 1.0,D | 1,D  | 4.5  | 4.54. | .   | .   | SOM | GT:/0:35 | 0/1:63,12:3 | C           | A |   |
|       |    |      |       |       |      | 2.9  | .     | .   | .   | SOM | GT:/0:43 | 0/1:76,10:3 | C           | T |   |
|       | ## | 0.4! | 0.0,B | 0.00  | 1.00 | 3.5  | .     | .   | .   | SOM | GT:/0:70 | 0/1:130,17  | G           | A |   |
|       |    |      |       |       |      |      |       |     |     | SOM | GT:/0:10 | 0/1:21,5:37 | T           | C |   |
|       | ## | ##   | 0.    | .     | .    | .    | .     | .   | .   | SOM | GT:/0:12 | 0/1:190,26  | C           | T |   |
| 2E-04 |    |      |       |       |      |      |       | 0.  | .   | SOM | GT:/0:18 | 0/1:24,6:37 | C           | T |   |
|       |    |      |       |       |      | 2.1  | .     | .   | .   | SOM | GT:/0:87 | 0/1:155,24  | G           | A |   |
|       |    | 0.0! | 0.96  | 0.99  | 0.53 | 3.45 | .     | .   | .   | SOM | GT:/0:60 | 0/1:101,37  | C           | A |   |
|       |    |      |       |       |      |      |       |     |     | SOM | GT:/0:10 | 0/1:204,41  | G           | A |   |
| 8E-04 |    |      |       |       |      |      |       | 0.  | .   | DB; | GT:/0:51 | 0/1:99,18:3 | C           | T |   |
|       |    |      |       |       |      |      |       |     |     | SOM | GT:/0:11 | 0/1:182,44  | G           | A |   |
|       |    |      |       |       |      |      |       |     |     | SOM | GT:/0:12 | 0/1:168,45  | C           | T |   |

|       |    |    |     |       |       |       |      |      |                            |                               |                            |   |
|-------|----|----|-----|-------|-------|-------|------|------|----------------------------|-------------------------------|----------------------------|---|
|       | ## | 0  |     |       |       |       |      |      | SOM GT:/0:21 0/1:18,4:37 C | T                             |                            |   |
|       |    |    |     |       |       |       |      |      | SOM GT:/0:21 0/1:44,6:37 C | A                             |                            |   |
| 2E-04 |    |    |     |       |       |       |      |      | SOM GT:/0:14 0/1:28,5:37 C | T                             |                            |   |
|       |    |    |     |       |       |       |      |      | SOM GT:/0:23 0/1:27,5:31 A | T                             |                            |   |
| 4E-04 | 0  | 0  | 0.0 | 0.932 | 0.99  | 0.99  | 2.73 | 0    | SOM GT:/0:43 0/1:64,11:3 G | A                             |                            |   |
|       |    |    |     |       |       |       |      |      | SOM GT:/0:10 0/1:1,2:37: G | A                             |                            |   |
|       | ## | ## | 0   | 0.0   | 1.0,D | 1.0,D | 0.99 | 4.3  | 5.25                       | SOM GT:/0:28 0/1:481,73 C     | T                          |   |
|       |    |    |     |       |       |       | 3.2  |      |                            | SOM GT:/0:57 0/1:75,22:3 C    | A                          |   |
|       |    |    |     |       |       |       |      |      |                            | SOM GT:/0:35 0/1:68,9:37 G    | A                          |   |
|       |    |    |     |       |       |       |      |      |                            | SOM GT:/0:17 0/1:16,5:37 C    | A                          |   |
|       |    |    |     |       |       |       |      |      |                            | SOM GT:/0:15 0/1:23,6:28 C    | A                          |   |
| 6E-04 |    |    |     |       |       |       |      |      |                            | SOM GT:/0:15 0/1:21,3:37 C    | T                          |   |
| 0.007 | 0  | 0  | 0   |       |       |       |      | 0    | 0.1                        | DB;SOM GT:/0:37 0/1:65,10:3 G | A                          |   |
|       |    |    | 0.0 | 0.99  | 1.0,D | 1.00  | 4.6  | 2.46 |                            | SOM GT:/0:42 0/1:73,11:3 G    | T                          |   |
|       |    |    |     |       |       |       | 3    | 2.07 |                            | SOM GT:/0:21 0/1:27,3:37 C    | T                          |   |
|       |    |    |     |       |       |       |      |      |                            | SOM GT:/0:26 0/1:35,4:37 T    | C                          |   |
|       |    |    | 0.7 | 0.23  | 0.804 | 1,N   | 2.47 |      |                            | SOM GT:/0:53 0/1:54,15:3 A    | T                          |   |
|       | ## | 0  | 0.0 | 0.99  | 1.0,D | 1,D   | 5    | 5.02 |                            | SOM GT:/0:38 0/1:50,11:3 T    | C                          |   |
| 0.003 | 0  | 0  | 0   |       |       |       |      |      |                            | SOM GT:/0:33 0/1:54,7:37 A    | G                          |   |
|       |    |    | 0.0 | 0.994 | 0.99  | 1,D   | 5.8  | 4.12 |                            | SOM GT:/0:33 0/1:104,8:3 A    | G                          |   |
|       |    |    |     |       |       |       |      |      |                            | SOM GT:/0:59 0/1:92,18:3 A    | G                          |   |
|       | ## | 0  | 0   | 0.1   | 0.787 | 0.99  | 1,N  | 3.04 |                            | SOM GT:/0:62 0/1:94,11:3 G    | A                          |   |
|       |    |    |     |       |       |       |      |      |                            | SOM GT:/0:11 0/1:12,3:37 G    | T                          |   |
|       |    |    |     |       |       |       |      | 0    |                            | SOM GT:/0:56 0/1:69,14:3 G    | A                          |   |
|       | ## | 0  |     |       |       |       | 1.99 |      |                            | SOM GT:/0:27 0/1:61,11:3 G    | A                          |   |
| 2E-04 | ## | 0  |     |       |       |       |      |      |                            | SOM GT:/0:25 0/1:411,67 C     | T                          |   |
|       |    |    | 0.7 | 0.99  | 1.0,D | 1.00  | 5.9  | 3.84 |                            | SOM GT:/0:27 0/1:32,4:34 G    | A                          |   |
|       |    |    |     |       |       |       |      |      |                            | SOM GT:/0:9,(0/1:9,3:37: G    | A                          |   |
|       |    |    |     |       |       |       |      |      |                            | SOM GT:/0:19 0/1:27,3:37 G    | A                          |   |
|       |    |    |     |       |       |       |      |      |                            | SOM GT:/0:65 0/1:74,4:37 A    | G                          |   |
|       |    |    |     |       |       |       |      |      |                            | SOM GT:/0:13 0/1:179,23 C     | T                          |   |
|       |    |    |     |       |       |       |      |      |                            | SOM GT:/0:13 0/1:28,3:37 G    | A                          |   |
|       |    |    |     |       |       |       |      | 0    |                            | SOM GT:/0:40 0/1:64,6:37 G    | A                          |   |
|       |    |    | 0.1 | 0.01  | 0.025 | 1,N   |      | 0    |                            | SOM GT:/0:46 0/1:97,20:3 G    | A                          |   |
|       | ## | ## | 0   |       |       |       |      |      |                            | SOM GT:/0:47 0/1:79,12:3 G    | A                          |   |
|       |    |    |     |       |       |       |      |      |                            | SOM GT:/0:22 0/1:39,14:3 C    | A                          |   |
|       |    |    |     |       |       |       |      |      |                            | SOM GT:/0:53 0/1:117,14 G     | A                          |   |
|       |    |    |     |       |       |       |      |      |                            | SOM GT:/0:12 0/1:11,5:37 C    | A                          |   |
| 6E-04 | 0  | 0  | 0   | 0.3   | 0.73  | 0.99  | 1,D  | 6    | 2.56                       | 0                             | SOM GT:/0:28 0/1:46,5:37 G | A |
| 8E-04 |    |    |     |       |       |       |      | 3.6  | 1.58                       |                               | SOM GT:/0:8,(0/1:7,3:37: A | G |
|       |    |    |     |       |       |       |      |      | 0                          |                               | SOM GT:/0:11 0/1:26,6:37 G | A |
|       |    |    |     |       |       |       |      |      |                            |                               | SOM GT:/0:13 0/1:17,3:37 A | G |
|       | ## | 0  |     |       |       |       |      | 0    | 0                          |                               | SOM GT:/0:56 0/1:89,13:3 C | T |
|       |    |    | 0.0 | 0.98  | 0.99  | 1,D   | 6.2  | 5.20 |                            |                               | SOM GT:/0:48 0/1:99,7:37 C | T |
|       |    |    |     |       |       |       |      |      |                            |                               | SOM GT:/0:63 0/1:96,24:3 G | A |
| 2E-04 | 0  | ## | 0   | 0.0   | 0.99  | 1.0,D | 1,D  | 5.2  | 4.17                       |                               | SOM GT:/0:10 0/1:177,36 C  | T |
|       |    |    | 0.0 | 0.99  | 1.0,D | 1,D   | 4.4  | 3.97 |                            |                               | SOM GT:/0:37 0/1:46,5:37 C | A |
|       |    |    |     |       |       |       |      |      |                            |                               | SOM GT:/0:31 0/1:74,9:37 C | A |
|       | ## | 0  |     |       |       |       | 2.1  | 1.45 |                            |                               | SOM GT:/0:28 0/1:40,5:37 A | G |
|       | 0  | 0  |     |       |       |       |      |      |                            |                               | SOM GT:/0:70 0/1:95,4:37 A | G |
|       |    |    |     |       |       |       |      |      |                            |                               | SOM GT:/0:21 0/1:28,6:28 A | G |
|       |    |    |     |       |       |       |      |      |                            |                               | SOM GT:/0:14 0/1:19,4:37 C | T |
|       |    |    |     |       |       |       | 2.57 |      |                            |                               | SOM GT:/0:38 0/1:69,6:37 A | G |
|       |    |    |     |       |       |       |      |      |                            |                               | SOM GT:/0:39 0/1:57,7:37 A | G |



|       |    |       |                  |                   |          |                            |   |
|-------|----|-------|------------------|-------------------|----------|----------------------------|---|
| 2E-04 | ## | 0 0.0 | 0.998 1.0,D 1.00 | 5.2 4.83          | 0        | SOM GT:/0:43 0/1:86,18:3 C | T |
|       |    |       |                  | 4.4 1.39          |          | SOM GT:/0:18 0/1:38,10:3 C | T |
|       |    |       |                  | 1.28              |          | SOM GT:/0:43 0/1:88,20:3 C | T |
|       |    |       |                  |                   |          | SOM GT:/0:17 0/1:50,4:37 C | T |
|       |    |       |                  |                   |          | SOM GT:/0:8,(0/1:12,4:37 C | T |
|       |    |       |                  | 1.59              |          | SOM GT:/0:10 0/1:148,34 G  | A |
|       | ## | ##    | 1,A              | 3.9 12.2          | 0        | SOM GT:/0:48 0/1:56,16:3 G | A |
|       |    | ##    | 0 0.1            | 0.006 0.066 0.72  | 3.9 3.01 | SOM GT:/0:21 0/1:53,13:3 G | A |
|       |    |       |                  |                   |          | SOM GT:/0:40 0/1:39,9:37 G | T |
|       |    |       |                  | 2.29              |          | SOM GT:/0:17 0/1:12,4:37 T | G |
|       |    | ##    | 0 0.0            | 0.336 0.912 0.99  | 5.8 3.59 | SOM GT:/0:52 0/1:104,22 C  | T |
|       |    |       |                  |                   |          | SOM GT:/0:11 0/1:42,4:37 G | A |
|       |    |       |                  |                   |          | SOM GT:/0:38 0/1:48,19:3 G | A |
|       |    |       |                  |                   |          | SOM GT:/0:37 0/1:41,11:3 C | T |
|       |    | ##    | 0 0.0            | 0.828 0.999 1,D   | 4.8 4.65 | SOM GT:/0:65 0/1:85,17:3 G | A |
|       | ## | ##    | 0 0.0            | 1.0,D 1.0,D 1,D   | 4.9 4.09 | SOM GT:/0:47 0/1:77,13:3 C | T |
|       |    |       |                  |                   |          | SOM GT:/0:56 0/1:86,18:3 C | T |
|       |    |       | 0.0              | 0.93,1 1.0,D 0.99 | 5.6 4.37 | SOM GT:/0:12 0/1:188,47 G  | A |
|       |    |       |                  | 3 2.85            |          | SOM GT:/0:60 0/1:96,21:3 A | G |
|       |    |       |                  |                   | 0        | SOM GT:/0:15 0/1:229,49 C  | T |
|       |    |       |                  |                   |          | SOM GT:/0:36 0/1:65,18:3 C | A |
|       |    |       |                  |                   |          | SOM GT:/0:17 0/1:12,6:37 G | A |
|       |    |       |                  |                   |          | SOM GT:/0:17 0/1:26,8:37 T | G |
|       |    |       |                  |                   |          | SOM GT:/0:18 0/1:30,5:34 C | T |
|       |    |       | 0.0              | 0.455 0.822 0.95  | 3.9 1.76 | SOM GT:/0:70 0/1:109,20 C  | T |
|       |    |       |                  |                   |          | SOM GT:/0:9,(0/1:7,6:35: T | A |
|       |    |       |                  |                   |          | SOM GT:/0:42 0/1:60,12:3 A | G |
|       |    | ##    | 0                |                   | 0        | SOM GT:/0:55 0/1:73,15:3 G | A |
|       |    |       |                  | 1,A               | 5 8.40   | SOM GT:/0:67 0/1:130,21 C  | T |
|       | 0  | 0     | 0                |                   | 1.65     | SOM GT:/0:31 0/1:53,12:3 C | T |
|       |    |       | 0.0              | 0.993 1.0,D 1,D   | 3.8 4.93 | SOM GT:/0:53 0/1:91,28:3 C | T |
| 2E-04 |    |       |                  |                   | 1.50     | SOM GT:/0:63 0/1:109,22 G  | A |
|       |    |       |                  |                   | 1.46     | SOM GT:/0:57 0/1:123,7:3 G | T |
|       |    |       |                  |                   |          | SOM GT:/0:24 0/1:55,5:37 C | T |
| 2E-04 | 0  | 0     |                  |                   |          | SOM GT:/0:36 0/1:77,4:37 C | T |
|       |    |       | 0.6              | 0.002 0.001 1,N   |          | SOM GT:/0:81 0/1:153,17 G  | T |
|       |    |       |                  |                   | 2.8      | SOM GT:/0:15 0/1:251,58 G  | A |
|       |    | ##    | 0                |                   |          | SOM GT:/0:37 0/1:62,12:3 G | A |
|       |    |       |                  |                   |          | SOM GT:/0:19 0/1:292,52 G  | A |
|       |    |       |                  |                   |          | SOM GT:/0:44 0/1:55,15:3 T | C |
|       |    |       |                  |                   |          | SOM GT:/0:21 0/1:33,6:33 G | T |
|       |    |       |                  |                   |          | SOM GT:/0:12 0/1:4,2:37: C | A |
|       |    |       |                  | 3.2 2.43          |          | SOM GT:/0:29 0/1:47,7:36 G | T |
|       |    |       |                  |                   |          | SOM GT:/0:19 0/1:36,8:37 G | A |
|       |    | ##    | 0                |                   |          | SOM GT:/0:16 0/1:295,76 C  | T |
|       | ## | ##    | 0 0.1            | 0.002 0.008 1,N   |          | SOM GT:/0:46 0/1:86,21:3 G | A |
|       |    |       | 0.1              | 0.257 0.687 1.00  | 4.7 1.29 | SOM GT:/0:56 0/1:89,21:3 A | G |
|       |    |       |                  |                   |          | SOM GT:/0:86 0/1:139,30 G  | T |
|       |    |       |                  |                   |          | SOM GT:/0:24 0/1:52,13:3 G | A |
|       |    | 0     | 0                |                   |          | SOM GT:/0:51 0/1:96,24:3 G | A |
|       |    | 0     | 0                |                   |          | SOM GT:/0:75 0/1:103,26 G  | A |
|       |    |       |                  |                   |          | SOM GT:/0:93 0/1:131,25 T  | C |
|       |    |       |                  |                   |          | SOM GT:/0:28 0/1:40,6:37 G | A |
|       |    |       | 0.0              | 0.993 1.0,D 1.00  | 3.2 1.94 | SOM GT:/0:95 0/1:164,33 C  | T |

|       |    |    |      |       |       |       |      |      |      |     |      |             |      |             |   |   |
|-------|----|----|------|-------|-------|-------|------|------|------|-----|------|-------------|------|-------------|---|---|
| 0     | ## | 0  | .    | .     | .     | .     | .    | 0    | SOM  | GT: | 0:23 | 0/1:394,61  | C    | T           |   |   |
| .     | .  | .  | .    | .     | .     | .     | .    | .    | SOM  | GT: | 0:10 | 0/1:23,5:37 | A    | G           |   |   |
| .     | .  | .  | .    | .     | .     | .     | .    | .    | SOM  | GT: | 0:48 | 0/1:90,25:3 | C    | T           |   |   |
| .     | .  | .  | .    | .     | .     | .     | .    | .    | SOM  | GT: | 0:51 | 0/1:91,14:3 | G    | A           |   |   |
| .     | .  | .  | .    | .     | .     | .     | .    | .    | SOM  | GT: | 0:72 | 0/1:99,24:3 | G    | T           |   |   |
| .     | .  | .  | .    | .     | .     | .     | .    | .    | SOM  | GT: | 0:19 | 0/1:32,11:3 | G    | A           |   |   |
| 0.18  | .  | .  | .    | .     | .     | .     | .    | .    | SOM  | GT: | 0:8, | 0/1:6,2:37  | T    | C           |   |   |
| .     | .  | .  | 0.1  | 0.015 | 0.027 | 1,N   | 4.8  | .    | SOM  | GT: | 0:83 | 0/1:116,18  | T    | C           |   |   |
| .     | .  | .  | .    | .     | .     | .     | .    | .    | SOM  | GT: | 0:39 | 0/1:55,7:37 | G    | A           |   |   |
| .     | .  | .  | .    | .     | .     | .     | .    | .    | SOM  | GT: | 0:26 | 0/1:27,3:37 | C    | T           |   |   |
| .     | .  | .  | .    | .     | .     | .     | 3.4  | 1.62 | SOM  | GT: | 0:65 | 0/1:130,6:3 | G    | A           |   |   |
| 0.01  | 0  | 0  | 0    | .     | .     | .     | 3.9  | .    | 0    | 0   | DB;  | GT:         | 0:10 | 0/1:199,43  | C | T |
| .     | .  | .  | .    | .     | .     | 1,D   | 5.4  | 16.1 | .    | .   | SOM  | GT:         | 0:83 | 0/1:137,20  | G | A |
| .     | .  | .  | 0.7  | 0.052 | 0.024 | 0.99  | 5.2  | .    | .    | .   | SOM  | GT:         | 0:13 | 0/1:219,44  | C | T |
| 0.003 | 0  | 0  | 0    | 0.1   | 0.001 | 0.008 | 1,N  | 1.50 | 0    | .   | DB;  | GT:         | 0:73 | 0/1:127,23  | C | T |
| .     | ## | 0  | .    | .     | .     | .     | .    | .    | 0    | 0   | SOM  | GT:         | 0:37 | 0/1:43,5:37 | C | T |
| .     | .  | .  | 0.96 | 0.99  | .     | .     | 5.7  | 5.19 | .    | .   | SOM  | GT:         | 0:79 | 0/1:102,15  | G | A |
| .     | ## | 0  | 0.0  | 0.992 | 1.0,D | 1,D   | 4.7  | 5.02 | .    | .   | SOM  | GT:         | 0:20 | 0/1:37,8:37 | C | T |
| .     | .  | .  | 0.0  | 1.0,D | 1.0,D | 1,D   | 4.9  | 4.04 | .    | .   | SOM  | GT:         | 0:47 | 0/1:86,17:3 | C | A |
| .     | .  | .  | .    | .     | .     | .     | 3.1  | 3.01 | .    | .   | SOM  | GT:         | 0:21 | 0/1:39,8:37 | G | A |
| .     | .  | .  | .    | .     | .     | .     | .    | .    | .    | .   | SOM  | GT:         | 0:10 | 0/1:35,6:37 | G | A |
| .     | ## | 0  | 0.0  | 0.151 | 0.54  | 1,D   | 3.2  | 2.63 | .    | .   | SOM  | GT:         | 0:14 | 0/1:263,48  | G | A |
| .     | .  | .  | 0.3  | .     | 0.99  | 2.7   | 1.67 | .    | .    | .   | SOM  | GT:         | 0:64 | 0/1:94,15:3 | G | A |
| .     | .  | .  | .    | .     | .     | .     | .    | .    | .    | .   | SOM  | GT:         | 0:21 | 0/1:25,6:37 | G | T |
| .     | .  | .  | .    | .     | .     | .     | .    | .    | .    | .   | SOM  | GT:         | 0:55 | 0/1:106,17  | C | T |
| .     | .  | .  | .    | .     | .     | .     | .    | .    | .    | .   | SOM  | GT:         | 0:41 | 0/1:51,9:35 | G | T |
| .     | .  | .  | .    | .     | .     | .     | .    | .    | .    | .   | SOM  | GT:         | 0:35 | 0/1:59,6:37 | C | A |
| .     | .  | .  | .    | .     | .     | .     | .    | .    | .    | .   | SOM  | GT:         | 0:59 | 0/1:75,8:37 | A | C |
| 0.005 | 0  | 0  | 0    | 0.0   | 0.978 | 1.0,D | 1,D  | 5.8  | 5.04 | .   | DB;  | GT:         | 0:96 | 0/1:137,19  | G | A |
| .     | .  | .  | 0.4  | 0.032 | 0.002 | 1.00  | 5.6  | 2.60 | .    | .   | SOM  | GT:         | 0:31 | 0/1:44,7:37 | A | G |
| .     | .  | .  | .    | .     | .     | .     | .    | 1.90 | .    | .   | SOM  | GT:         | 0:16 | 0/1:34,4:37 | A | T |
| .     | .  | .  | .    | .     | .     | .     | .    | .    | .    | .   | SOM  | GT:         | 0:19 | 0/1:47,9:37 | C | A |
| .     | .  | .  | .    | .     | .     | .     | .    | .    | .    | .   | SOM  | GT:         | 0:69 | 0/1:96,21:3 | C | T |
| .     | .  | .  | 0.0  | 0.995 | 1.0,D | 1,D   | 5.4  | 4.86 | .    | .   | SOM  | GT:         | 0:52 | 0/1:62,20:3 | C | T |
| .     | .  | .  | 0.1  | 0.029 | 0.703 | 0.63  | 2.3  | 2.96 | .    | .   | SOM  | GT:         | 0:11 | 0/1:203,46  | G | A |
| .     | .  | .  | .    | .     | 1,D   | 3.5   | 11.1 | .    | .    | .   | SOM  | GT:         | 0:64 | 0/1:107,22  | G | A |
| .     | ## | .  | .    | .     | .     | .     | .    | .    | .    | .   | SOM  | GT:         | 0:75 | 0/1:129,25  | C | T |
| .     | .  | .  | 0.0  | 0.977 | 0.999 | 1.00  | 3.5  | .    | .    | .   | SOM  | GT:         | 0:22 | 0/1:54,9:34 | T | C |
| .     | .  | .  | .    | .     | .     | .     | .    | .    | .    | .   | SOM  | GT:         | 0:45 | 0/1:59,8:37 | T | C |
| .     | .  | .  | 0.0  | 1.0,D | 1.0,D | 1.00  | 4.4  | 4.35 | .    | .   | SOM  | GT:         | 0:53 | 0/1:115,7:3 | T | G |
| .     | ## | 0  | 0.0  | 1.0,D | 1.0,D | 0.90  | 3.2  | .    | .    | .   | SOM  | GT:         | 0:16 | 0/1:247,51  | G | A |
| .     | ## | .  | 1.0  | 0.004 | 0.006 | 1,N   | .    | .    | .    | .   | SOM  | GT:         | 0:77 | 0/1:102,16  | C | T |
| .     | ## | 0  | .    | .     | .     | .     | .    | .    | 0    | .   | SOM  | GT:         | 0:35 | 0/1:45,5:37 | C | T |
| .     | ## | 0  | 0.0  | 1.0,D | 1.0,D | 1.00  | 5    | 4.11 | .    | .   | SOM  | GT:         | 0:98 | 0/1:165,21  | G | A |
| .     | .  | .  | .    | .     | .     | .     | .    | 5.1  | .    | .   | SOM  | GT:         | 0:17 | 0/1:24,7:37 | C | A |
| .     | .  | .  | .    | .     | .     | .     | .    | .    | .    | .   | SOM  | GT:         | 0:14 | 0/1:250,37  | G | T |
| .     | ## | 0  | .    | .     | .     | .     | .    | .    | 0    | .   | SOM  | GT:         | 0:68 | 0/1:88,17:3 | G | A |
| .     | ## | ## | 0    | 0.0   | 0.288 | 0.928 | 1.00 | 5    | 3.02 | .   | SOM  | GT:         | 0:67 | 0/1:119,13  | C | T |
| .     | ## | ## | 0    | 0.0   | 0.005 | 0.006 | 0.75 | 3.7  | 1.63 | .   | SOM  | GT:         | 0:92 | 0/1:179,31  | C | T |
| .     | .  | .  | .    | .     | .     | .     | 4.7  | .    | .    | .   | SOM  | GT:         | 0:15 | 0/1:37,8:34 | T | G |
| .     | ## | 0  | 0.3  | 0.812 | 0.997 | 1,D   | 5.3  | 3.80 | .    | .   | SOM  | GT:         | 0:34 | 0/1:60,10:3 | C | T |
| 0.023 | 0  | 0  | 0    | .     | .     | .     | .    | .    | .    | .   | DB;  | GT:         | 0:40 | 0/1:96,17:3 | G | A |
| .     | .  | .  | .    | .     | .     | .     | .    | .    | .    | .   | SOM  | GT:         | 0:32 | 0/1:70,11:3 | T | A |
| .     | ## | 0  | 0.0  | 0.069 | 0.218 | 1.00  | 5    | 3.71 | .    | .   | SOM  | GT:         | 0:45 | 0/1:93,19:3 | C | T |

|       |    |    |   |     |       |       |      |                            |      |                            |                           |   |
|-------|----|----|---|-----|-------|-------|------|----------------------------|------|----------------------------|---------------------------|---|
|       | ## | 0  |   |     |       | 1.45  |      | SOM GT:/0:86 0/1:157,30 G  | A    |                            |                           |   |
| 2E-04 | 0  | 0  | 0 |     |       |       |      | SOM GT:/0:25 0/1:42,6:37 C | T    |                            |                           |   |
|       |    |    |   |     |       |       |      | SOM GT:/0:15 0/1:22,5:37 G | A    |                            |                           |   |
|       |    |    |   | 0.2 | 0.0,B | 0.0,B | 1,N  | SOM GT:/0:86 0/1:178,38 G  | A    |                            |                           |   |
|       |    |    |   |     |       | 3.1   |      | SOM GT:/0:49 0/1:95,22:3 G | A    |                            |                           |   |
|       | ## | ## | 0 | 0.1 | 0.662 | 0.998 | 0.82 | 2.3                        | 4.16 | SOM GT:/0:59 0/1:131,22 G  | A                         |   |
|       |    |    |   | 0.0 | 0.718 | 0.991 | 0.96 | 3.8                        | 3.80 | SOM GT:/0:45 0/1:96,23:3 G | A                         |   |
|       |    |    |   |     |       |       |      |                            |      | SOM GT:/0:12 0/1:26,4:34 T | G                         |   |
|       |    |    |   |     |       |       |      |                            |      | SOM GT:/0:16 0/1:230,32 G  | A                         |   |
|       |    |    |   |     |       | 2.6   |      | SOM GT:/0:13 0/1:196,44 C  | T    |                            |                           |   |
|       |    |    |   |     |       | 2.1   |      | SOM GT:/0:61 0/1:105,18 C  | T    |                            |                           |   |
|       |    |    |   | 0.1 | 0.979 | 0.995 | 0.53 | 2.3                        | 2.09 | SOM GT:/0:59 0/1:123,24 C  | T                         |   |
|       |    |    |   | 0.0 | 0.992 | 0.999 | 1.00 | 5                          | 4.68 | SOM GT:/0:67 0/1:151,23 T  | C                         |   |
|       |    |    |   |     |       |       |      |                            |      | SOM GT:/0:23 0/1:30,6:37 G | A                         |   |
|       |    |    |   |     |       |       |      | 0                          |      | SOM GT:/0:52 0/1:52,8:32 C | T                         |   |
|       | ## | ## | 0 |     |       |       |      | 3.28                       |      | SOM GT:/0:24 0/1:466,80 C  | T                         |   |
|       |    | ## | 0 | 0.0 | 0.998 | 1.0   | D    | 1,D                        | 4.1  | 3.12                       | SOM GT:/0:27 0/1:427,85 C | T |
|       |    |    |   |     |       |       |      |                            |      | SOM GT:/0:25 0/1:21,6:37 G | A                         |   |
|       |    |    |   |     |       |       |      |                            |      | SOM GT:/0:28 0/1:33,7:33 A | G                         |   |
|       |    | ## | 0 | 0.0 | 0.959 | 1.0   | D    | 1.00                       | 4.8  | 4.03                       | SOM GT:/0:74 0/1:116,29 C | T |
| 0.002 |    |    |   |     |       |       |      | 2.5                        |      | SOM GT:/0:59 0/1:120,15 G  | A                         |   |
|       |    |    |   |     |       |       |      |                            |      | SOM GT:/0:28 0/1:34,3:37 G | C                         |   |
|       |    |    |   |     |       | 2.4   |      | SOM GT:/0:39 0/1:55,8:37 C | A    |                            |                           |   |
|       |    |    |   |     |       |       |      |                            |      | SOM GT:/0:38 0/1:59,9:37 A | G                         |   |
|       |    |    |   |     |       |       |      |                            |      | SOM GT:/0:19 0/1:20,6:37 C | A                         |   |
|       |    |    |   |     |       |       |      |                            |      | SOM GT:/0:22 0/1:22,4:37 T | C                         |   |
|       |    |    |   |     |       | 4.4   |      | SOM GT:/0:36 0/1:50,17:3 G | A    |                            |                           |   |
|       |    |    |   |     |       |       |      |                            |      | SOM GT:/0:19 0/1:33,9:37 C | T                         |   |
|       |    | ## | 0 | 0.2 | 0.05, | 0.652 | 1,N  |                            |      | SOM GT:/0:75 0/1:97,17:3 G | A                         |   |
|       |    | ## | 0 | 0.1 | 0.004 | 0.096 | 1,N  | 1.64                       |      | SOM GT:/0:59 0/1:93,15:3 G | A                         |   |
|       |    | ## | 0 |     |       |       |      |                            |      | SOM GT:/0:29 0/1:59,13:3 C | T                         |   |
|       |    |    |   |     |       |       |      |                            |      | SOM GT:/0:11 0/1:220,40 G  | A                         |   |
|       |    |    |   |     |       |       |      | 0                          | 0.1  | SOM GT:/0:10 0/1:2,2:37: G | C                         |   |
|       |    |    |   |     |       |       |      |                            |      | SOM GT:/0:44 0/1:61,9:35 G | A                         |   |
|       |    |    |   | 0.0 | 0.999 | 1.0   | D    | 1,D                        | 5.6  | 4.14                       | SOM GT:/0:50 0/1:100,29 G | A |
|       |    |    |   |     |       |       |      |                            |      | SOM GT:/0:20 0/1:27,8:37 G | A                         |   |
| 0.007 |    | 0  | 0 |     |       |       |      |                            |      | DB;:GT:/0:30 0/1:41,9:35 G | A                         |   |
| 0.001 | 0  | 0  | 0 | 0.0 | 0.233 | 0.647 | 1,D  | 5.6                        | 3.66 | SOM GT:/0:44 0/1:65,15:3 G | A                         |   |
|       |    |    |   |     |       |       |      |                            |      | SOM GT:/0:20 0/1:26,6:37 G | A                         |   |
|       |    | ## | 0 | 0.0 | 0.204 | 0.284 | 1,D  | 5.3                        | 3.64 | SOM GT:/0:68 0/1:90,23:3 C | T                         |   |
|       |    |    |   |     |       | 3.9   | 1.89 | SOM GT:/0:28 0/1:44,9:35 A | G    |                            |                           |   |
|       |    |    |   |     |       | 1.33  |      | SOM GT:/0:48 0/1:62,14:3 T | C    |                            |                           |   |
|       |    |    |   |     |       | 1.75  |      | SOM GT:/0:99 0/1:150,24 A  | G    |                            |                           |   |
| 4E-04 |    |    |   |     |       |       |      |                            |      | SOM GT:/0:30 0/1:69,7:37 C | T                         |   |
|       |    |    |   |     |       | 5.8   | 5.38 | SOM GT:/0:16 0/1:35,12:3 G | A    |                            |                           |   |
|       |    |    |   |     |       |       |      |                            |      | SOM GT:/0:63 0/1:89,17:3 C | T                         |   |
|       |    | ## | 0 |     |       |       |      |                            |      | SOM GT:/0:35 0/1:50,13:3 G | A                         |   |
|       |    |    |   |     |       |       |      | 0                          |      | SOM GT:/0:26 0/1:22,15:3 T | G                         |   |
|       |    |    |   |     |       | 4.8   |      | SOM GT:/0:83 0/1:110,16 C  | T    |                            |                           |   |
|       |    |    |   |     |       | 2.7   |      | SOM GT:/0:75 0/1:111,21 C  | A    |                            |                           |   |
|       |    |    |   | 0.1 | 0.211 | 0.673 | 0.98 | 4.9                        | 3.03 | SOM GT:/0:70 0/1:130,27 C  | T                         |   |
|       |    |    |   |     |       |       |      |                            |      | SOM GT:/0:21 0/1:31,6:37 G | T                         |   |
|       |    |    |   |     |       | 2.81  |      | SOM GT:/0:78 0/1:149,35 C  | A    |                            |                           |   |
|       |    |    |   |     |       | 4.7   |      | SOM GT:/0:43 0/1:65,11:3 G | A    |                            |                           |   |

|       |    |    |     |       |       |       |      |      |                           |   |                             |   |
|-------|----|----|-----|-------|-------|-------|------|------|---------------------------|---|-----------------------------|---|
|       | ## | 0  |     |       |       |       |      |      | SOM GT:/0:38 0/1:65,13:3T | C |                             |   |
|       |    |    | 0.0 | 1.0,D | 1.0,D | 1,D   | 4.7  | 4.88 | SOM GT:/0:42 0/1:68,5:37C | A |                             |   |
| 0.002 | 0  | 0  | 0   | 0.0   | 0.977 | 1.0,D | 0.83 | 4.3  | 3.69                      | 0 | SOM GT:/0:10 0/1:200,36 C   | T |
| 0.003 | 0  | 0  | 0   | 0.0   | 0.77, | 0.819 | 1,N  |      | 1.29                      |   | SOM GT:/0:25 0/1:403,73 C   | T |
| 0.002 |    | 0  | 0   |       |       |       |      |      |                           | 0 | SOM GT:/0:14 0/1:176,31 C   | T |
|       |    |    |     |       |       |       |      | 2.9  |                           |   | SOM GT:/0:58 0/1:88,15:3C   | A |
|       |    |    | 0.0 | 0.998 | 0.998 | 1,D   | 5.5  | 3.68 |                           |   | SOM GT:/0:48 0/1:61,11:3C   | T |
|       |    |    | 0.0 | 1.0,D | 1.0,D | 1,D   | 5.4  | 5.19 |                           |   | SOM GT:/0:78 0/1:124,28 G   | A |
| 4E-04 |    | 0  | 0   |       |       |       |      |      |                           |   | SOM GT:/0:36 0/1:74,10:3C   | T |
|       | ## |    |     |       |       |       |      |      |                           |   | DB;:GT:/0:21 0/1:398,69 G   | T |
|       | ## | 0  | 0.1 | 1.0,D | 1.0,D | 1,D   | 5.9  | 4.06 |                           |   | SOM GT:/0:72 0/1:108,27 G   | A |
|       |    |    | 0.0 | 0.61, | 0.566 | 0.97  |      | 3.26 |                           |   | SOM GT:/0:87 0/1:139,26 G   | T |
|       |    |    |     |       |       |       |      |      |                           |   | SOM GT:/0:14 0/1:17,3:37G   | A |
|       |    |    |     |       |       |       |      |      |                           |   | SOM GT:/0:9,(0/1:17,3:37G   | A |
|       |    |    |     |       |       |       |      |      |                           |   | SOM GT:/0:22 0/1:31,4:27C   | T |
|       |    |    |     |       |       |       | 2    |      |                           |   | SOM GT:/0:9,(0/1:45,11:3G   | A |
|       | ## | 0  | 0.5 | 0.168 | 0.642 | 0.85  | 4.9  | 3.51 |                           |   | SOM GT:/0:45 0/1:77,9:32G   | A |
|       |    |    |     |       |       |       |      |      |                           |   | SOM GT:/0:17 0/1:31,5:37G   | T |
|       |    |    |     |       |       |       | 3.7  | 1.29 |                           |   | SOM GT:/0:14 0/1:220,39 C   | T |
| 4E-04 | ## | ## | 0   |       |       |       |      |      |                           | 0 | SOM GT:/0:13 0/1:175,37 C   | T |
|       |    |    |     |       |       |       |      |      |                           | 0 | 0 SOM GT:/0:43 0/1:69,12:3G | A |
|       |    |    |     |       |       |       |      |      |                           | 0 | SOM GT:/0:17 0/1:21,3:37C   | T |
|       |    |    |     |       |       |       |      |      |                           |   | SOM GT:/0:91 0/1:144,29 C   | A |
|       |    |    |     |       |       |       | 2.3  |      |                           |   | SOM GT:/0:28 0/1:48,9:37G   | T |
|       |    |    | 0.0 | 0.928 | 0.997 | 1.00  | 4.9  | 3.64 |                           |   | SOM GT:/0:12 0/1:226,36 A   | G |
|       |    |    | 0.1 | 0.005 | 0.04, | 1,N   |      | 2.00 |                           |   | SOM GT:/0:83 0/1:127,22 G   | A |
|       |    |    |     |       |       |       |      | 3.44 |                           |   | SOM GT:/0:19 0/1:42,11:3C   | T |
|       |    |    |     |       |       |       |      |      |                           |   | SOM GT:/0:8,(0/1:10,3:37C   | T |
|       |    |    |     |       |       |       |      |      |                           |   | SOM GT:/0:87 0/1:130,32 C   | A |
|       |    |    |     |       |       |       | 1.00 | 2.9  | 1.47                      |   | SOM GT:/0:35 0/1:68,13:3T   | C |
|       |    |    | 0.1 | 0.001 | 0.0,B | 1,N   |      |      |                           |   | SOM GT:/0:57 0/1:91,18:3T   | A |
|       |    |    | 0.1 | 0.666 | 0.885 | 1,D   | 3.1  | 2.21 |                           |   | SOM GT:/0:35 0/1:58,10:3G   | A |
|       |    |    |     |       |       |       | 2.2  | 1.34 |                           |   | SOM GT:/0:8,(0/1:17,3:37A   | G |
|       |    |    |     |       |       |       |      |      |                           | 0 | DB;:GT:/0:21 0/1:28,3:37T   | C |
|       |    |    |     |       |       |       |      |      |                           |   | SOM GT:/0:64 0/1:90,16:3C   | A |
|       |    |    |     |       |       |       |      |      |                           |   | SOM GT:/0:69 0/1:131,21 G   | A |
|       |    |    |     |       |       |       | 2.01 |      |                           |   | SOM GT:/0:50 0/1:83,15:3C   | A |
|       | ## | 0  | 0.0 | 0.99, | 1.0,D | 1,D   |      | 4.09 |                           |   | SOM GT:/0:46 0/1:79,14:3C   | T |
|       |    |    | 0.0 | 0.93, | 0.996 | 1,D   | 6    | 3.76 |                           |   | SOM GT:/0:51 0/1:76,12:3T   | C |
|       | ## | 0  |     |       |       |       |      |      |                           |   | SOM GT:/0:17 0/1:17,3:37C   | T |
|       |    |    | 0.0 | 0.999 | 1.0,D | 1.00  | 4    | 4.05 |                           |   | SOM GT:/0:39 0/1:61,6:37C   | T |
|       |    |    |     |       |       | 1,A   | 3.9  | 7.41 |                           |   | SOM GT:/0:25 0/1:43,6:37G   | T |
|       |    |    |     |       |       |       |      |      |                           |   | SOM GT:/0:8,(0/1:27,8:37A   | C |
|       |    |    | 0.0 | 0.865 | 0.988 | 0.96  | 3.7  | 1.94 |                           |   | SOM GT:/0:27 0/1:28,5:37A   | G |
|       |    |    |     |       |       |       |      |      |                           |   | SOM GT:/0:44 0/1:61,11:3A   | G |
|       |    |    |     |       |       |       | 3.1  | 2.96 |                           |   | SOM GT:/0:36 0/1:51,7:35C   | T |
|       | 0  | ## | 0   |       |       |       |      |      |                           |   | SOM GT:/0:62 0/1:111,17 C   | T |
|       |    |    |     |       |       |       |      |      |                           |   | SOM GT:/0:36 0/1:65,11:3C   | T |
|       |    |    |     |       |       |       |      |      |                           |   | SOM GT:/0:36 0/1:66,7:37G   | A |
|       |    |    |     |       |       |       |      |      |                           |   | SOM GT:/0:10 0/1:15,7:33C   | T |
|       |    |    |     |       |       |       |      |      |                           |   | SOM GT:/0:9,(0/1:13,3:37C   | T |
|       |    |    |     |       |       |       |      |      |                           |   | SOM GT:/0:13 0/1:42,4:37C   | T |
|       |    |    |     |       |       |       |      |      |                           |   | SOM GT:/0:27 0/1:29,5:37A   | T |
|       |    |    | 0.0 | 0.069 | 0.246 | 1,N   |      |      |                           |   | SOM GT:/0:55 0/1:90,18:3A   | C |

|       |    |    |     |       |       |       |      |      |                             |                            |   |
|-------|----|----|-----|-------|-------|-------|------|------|-----------------------------|----------------------------|---|
|       |    |    |     |       |       |       |      |      | SOM GT:/0:36 0/1:61,8:37 C  | T                          |   |
|       |    |    | 0.0 | 0.808 | 0.98  | 1,1,N | 2.20 |      | SOM GT:/0:15 0/1:281,45 T   | C                          |   |
| 2E-04 |    |    |     |       |       |       | 1.67 |      | SOM GT:/0:66 0/1:126,36 G   | A                          |   |
|       | ## | 0  | 0.0 | 0.996 | 1.0,D | 1,D   | 4.6  | 5.03 | SOM GT:/0:56 0/1:92,24:3 G  | A                          |   |
|       |    |    |     |       |       |       |      |      | SOM GT:/0:40 0/1:68,15:3 A  | G                          |   |
| 0.035 |    |    |     |       |       |       | 2.5  | 3.31 | DB;S GT:/0:24 0/1:42,8:37 G | A                          |   |
|       |    |    |     |       |       |       |      |      | SOM GT:/0:77 0/1:95,25:3 G  | A                          |   |
|       |    |    | 0.0 | 0.987 | 0.996 | 1,D   | 5.7  | 5.20 | SOM GT:/0:34 0/1:55,7:37 T  | C                          |   |
|       |    |    |     |       |       |       |      |      | SOM GT:/0:58 0/1:102,11 A   | G                          |   |
|       |    |    |     |       |       |       |      |      | SOM GT:/0:45 0/1:73,21:3 G  | T                          |   |
|       | ## | ## |     |       |       |       |      | 0    | SOM GT:/0:20 0/1:38,4:37 C  | T                          |   |
| 2E-04 | ## | 0  | 0.1 | 0.446 | 0.995 | 0.96  |      |      | SOM GT:/0:63 0/1:99,19:3 G  | A                          |   |
|       |    |    |     |       |       |       | 4.6  |      | SOM GT:/0:69 0/1:117,29 C   | T                          |   |
|       |    |    |     |       |       |       |      |      | SOM GT:/0:38 0/1:62,24:3 G  | A                          |   |
|       |    |    |     |       |       |       | 2.01 |      | SOM GT:/0:49 0/1:114,5:3 C  | T                          |   |
|       |    |    |     |       |       |       |      |      | SOM GT:/0:36 0/1:75,13:3 G  | A                          |   |
|       |    |    |     |       |       |       | 5.3  | 2.00 | SOM GT:/0:14 0/1:23,5:26 G  | T                          |   |
|       | ## | ## | 0   | 0.0   | 0.871 | 0.991 | 0.99 | 4.1  | 4.54                        | SOM GT:/0:41 0/1:48,5:37 C | T |
|       | ## | 0  | 0.0 | 0.98  | 1.0,D | 1.00  | 4.9  | 4.81 | SOM GT:/0:82 0/1:111,22 C   | T                          |   |
| 0.021 |    |    |     |       |       |       |      | 0    | DB;S GT:/0:34 0/1:39,7:37 T | A                          |   |
|       |    |    |     |       |       |       |      |      | SOM GT:/0:14 0/1:25,4:37 G  | C                          |   |
|       |    |    | 0.0 | 0.998 | 0.999 | 1,D   | 5    | 4.83 | SOM GT:/0:95 0/1:155,32 G   | A                          |   |
|       | ## | ## | 0   |       |       |       |      | 0    | SOM GT:/0:38 0/1:70,12:3 G  | A                          |   |
|       |    |    |     |       |       |       |      |      | SOM GT:/0:26 0/1:34,3:37 T  | C                          |   |
| 2E-04 | 0  | 0  | 0.0 | 0.014 | 0.068 | 1.00  | 3.03 |      | SOM GT:/0:10 0/1:180,30 G   | A                          |   |
|       |    |    | 0.1 | 0.272 | 0.565 | 0.99  | 3    | 2.43 | SOM GT:/0:68 0/1:107,29 T   | G                          |   |
| 2E-04 | 0  | 0  |     |       |       |       | 3.9  |      | SOM GT:/0:45 0/1:54,11:3 C  | T                          |   |
|       |    |    | 0.0 | 0.549 | 0.956 | 1,D   | 5.2  | 4.98 | SOM GT:/0:56 0/1:74,10:3 A  | G                          |   |
|       |    |    | 0.2 | 0.012 | 0.019 | 1,D   | 4.9  | 2.97 | SOM GT:/0:58 0/1:76,15:3 A  | G                          |   |
|       |    |    | 0.0 | 0.001 | 0.003 | 1,N   |      |      | SOM GT:/0:55 0/1:88,17:3 G  | A                          |   |
|       | ## | 0  |     |       |       |       | 2.9  |      | SOM GT:/0:50 0/1:93,14:3 C  | T                          |   |
|       |    |    | 0.0 | 0.946 | 0.999 | 1.00  | 5.5  | 4.78 | SOM GT:/0:35 0/1:59,6:37 A  | C                          |   |
|       | ## | ## | 0   | 0.4   | 0.195 | 0.736 | 1.00 | 5.9  | 2.50                        | SOM GT:/0:30 0/1:38,7:37 C | T |
|       |    |    |     |       |       |       | 1.50 |      | SOM GT:/0:58 0/1:78,12:3 G  | T                          |   |
|       |    |    | 0.2 | 0.976 | 0.999 | 1,D   | 5.1  | 3.90 | SOM GT:/0:37 0/1:64,11:3 C  | A                          |   |
|       |    |    | 0.0 | 0.999 | 1.0,D | 1,D   | 5.7  | 4.55 | SOM GT:/0:50 0/1:79,8:37 G  | T                          |   |
|       | ## | 0  |     |       |       |       | 3.1  | 1.36 | SOM GT:/0:59 0/1:61,13:3 C  | T                          |   |
|       |    |    |     |       |       |       |      | 0    | SOM GT:/0:38 0/1:39,10:3 A  | G                          |   |
|       |    |    | 0.0 | 0.864 | 0.997 | 0.99  | 3.3  | 2.82 | SOM GT:/0:32 0/1:64,9:37 G  | T                          |   |
|       |    |    |     |       |       |       |      |      | SOM GT:/0:72 0/1:112,20 C   | T                          |   |
|       |    |    |     |       |       |       |      |      | SOM GT:/0:30 0/1:38,6:37 G  | A                          |   |
| 2E-04 | ## | 0  | 0.0 | 0.266 | 0.923 | 1,D   | 5.7  | 3.88 | SOM GT:/0:58 0/1:84,12:3 G  | A                          |   |
| 2E-04 | ## |    |     |       |       |       |      |      | SOM GT:/0:26 0/1:54,8:37 G  | A                          |   |
|       |    |    |     |       |       |       |      |      | SOM GT:/0:27 0/1:35,5:37 T  | C                          |   |
|       | ## | 0  | 0.5 | 0.002 | 0.002 | 1,N   | 4.1  |      | SOM GT:/0:75 0/1:130,30 C   | T                          |   |
|       |    |    |     |       |       |       |      |      | SOM GT:/0:53 0/1:87,9:35 C  | T                          |   |
|       |    |    |     |       |       |       |      |      | SOM GT:/0:29 0/1:29,10:3 A  | G                          |   |
|       |    |    |     |       |       |       | 4.4  |      | SOM GT:/0:23 0/1:43,9:35 G  | T                          |   |
|       |    |    | 0.0 | 0.999 | 1.0,D | 1,D   | 5.4  | 4.00 | SOM GT:/0:71 0/1:96,20:3 G  | T                          |   |
|       |    |    |     |       |       |       |      |      | SOM GT:/0:48 0/1:80,13:3 G  | A                          |   |
|       |    |    |     |       |       |       |      |      | SOM GT:/0:75 0/1:132,24 C   | T                          |   |
|       |    |    | 0.2 | 1.0,D | 1.0,D | 1,D   | 6    | 2.22 | SOM GT:/0:23 0/1:57,7:37 C  | T                          |   |
|       |    |    |     |       |       |       |      |      | SOM GT:/0:13 0/1:14,4:37 T  | C                          |   |
|       |    |    |     |       |       |       |      |      | SOM GT:/0:19 0/1:36,6:37 C  | T                          |   |

|       |    |    |   |                     |          |   |   |  |          |                            |   |
|-------|----|----|---|---------------------|----------|---|---|--|----------|----------------------------|---|
|       |    |    |   |                     |          |   |   |  |          | SOM GT:/0:9,(0/1:9,3:37: G | T |
|       |    |    |   |                     |          |   |   |  | 3.7      | SOM GT:/0:22 0/1:25,4:37 C | A |
|       | ## | ## | 0 |                     |          |   |   |  |          | SOM GT:/0:59 0/1:87,15:3 G | A |
|       |    | ## | 0 |                     |          |   |   |  |          | SOM GT:/0:52 0/1:82,9:34 C | T |
|       |    |    |   |                     |          |   |   |  |          | SOM GT:/0:62 0/1:95,4:37 T | G |
|       |    |    |   |                     |          |   |   |  |          | SOM GT:/0:16 0/1:27,7:35 A | G |
|       |    |    |   |                     |          |   |   |  | 3.27     | SOM GT:/0:83 0/1:124,28 G  | T |
|       |    |    |   |                     |          |   |   |  | 3.6 2.68 | SOM GT:/0:18 0/1:28,5:37 C | T |
|       |    | 0  | 0 |                     |          |   |   |  | 2.56     | SOM GT:/0:38 0/1:55,7:37 C | T |
|       |    |    |   | 0.7,0.0010.0011,N   |          |   |   |  |          | SOM GT:/0:68 0/1:82,20:3 A | T |
|       |    |    |   |                     |          |   |   |  |          | SOM GT:/0:9,(0/1:9,3:37: G | A |
|       |    |    |   |                     |          |   |   |  |          | SOM GT:/0:40 0/1:59,14:3 C | T |
|       |    |    |   |                     |          |   |   |  |          | SOM GT:/0:15 0/1:23,4:37 G | T |
|       |    |    |   |                     |          |   |   |  |          | SOM GT:/0:12 0/1:21,3:37 G | A |
| 2E-04 |    |    |   |                     |          |   |   |  |          | SOM GT:/0:57 0/1:94,11:3 G | A |
|       |    |    |   |                     |          |   |   |  |          | SOM GT:/0:18 0/1:32,7:37 C | A |
|       |    |    |   |                     |          |   |   |  |          | SOM GT:/0:14 0/1:19,3:37 G | A |
|       |    |    |   |                     |          |   |   |  | 2.11     | SOM GT:/0:22 0/1:32,4:37 T | C |
|       | ## | ## | 0 |                     |          |   |   |  |          | SOM GT:/0:28 0/1:45,12:3 C | T |
|       |    |    |   |                     |          |   |   |  |          | SOM GT:/0:36 0/1:58,10:3 T | C |
| 0.001 |    | 0  | 0 |                     |          |   |   |  | 0 0      | SOM GT:/0:11 0/1:165,45 G  | A |
|       |    |    |   |                     |          |   |   |  | 5.5 4.12 | SOM GT:/0:18 0/1:23,5:37 T | G |
|       |    | ## | 0 |                     |          |   |   |  |          | SOM GT:/0:42 0/1:74,14:3 C | T |
|       |    |    |   | 0.3 0.8140.9991,N   | 4.4 1.24 | 0 | 0 |  |          | SOM GT:/0:40 0/1:75,16:3 G | A |
|       |    |    |   |                     |          |   |   |  |          | SOM GT:/0:39 0/1:63,12:3 G | T |
|       |    |    |   |                     |          |   |   |  |          | SOM GT:/0:13 0/1:227,35 T  | C |
|       |    |    |   |                     |          |   |   |  |          | SOM GT:/0:46 0/1:61,11:3 C | T |
|       |    |    |   | 0.0 0.9760.9991,D   | 5.8 5.60 |   |   |  |          | SOM GT:/0:57 0/1:98,18:3 C | T |
|       |    |    |   |                     |          |   |   |  |          | SOM GT:/0:65 0/1:142,5:3 C | T |
|       |    |    |   | 0.77, 0.99, 1.00    | 5.2 4.36 |   |   |  |          | SOM GT:/0:34 0/1:40,8:37 G | T |
|       |    | ## | 0 | 0.0 0.7430.9581,D   | 4.9 4.00 | 0 |   |  |          | SOM GT:/0:26 0/1:37,6:37 G | A |
|       |    |    |   |                     |          |   |   |  |          | SOM GT:/0:29 0/1:50,8:37 G | A |
|       |    | ## | 0 |                     |          |   |   |  |          | SOM GT:/0:57 0/1:80,19:3 G | A |
|       |    |    |   |                     |          |   |   |  | 4.7 1.34 | SOM GT:/0:18 0/1:27,7:37 T | C |
|       |    |    |   | 0.3380.3521,D       | 5.9 3.74 |   |   |  |          | SOM GT:/0:27 0/1:60,6:37 G | T |
|       |    |    |   |                     |          |   |   |  |          | SOM GT:/0:29 0/1:34,6:37 T | G |
|       |    |    |   |                     |          |   |   |  |          | SOM GT:/0:36 0/1:70,20:3 C | T |
|       |    |    |   | 0.0 0.0050.0131,N   | 2.1 3.35 |   |   |  |          | SOM GT:/0:57 0/1:75,14:3 C | T |
|       |    |    |   | 0.0 0.9630.9981,D   | 5.5 2.69 |   |   |  |          | SOM GT:/0:54 0/1:82,9:37 T | C |
|       |    | ## |   | 1.0,0.1160.84, 0.99 | 4.1 1.69 |   |   |  |          | DB;:GT:/0:26 0/1:37,7:37 C | T |
|       |    |    |   |                     |          |   |   |  |          | SOM GT:/0:9,(0/1:13,4:37 G | A |
|       |    |    |   |                     |          |   |   |  |          | SOM GT:/0:9,(0/1:13,4:37 G | A |
| 6E-04 |    |    |   |                     |          |   |   |  | 0 0      | SOM GT:/0:43 0/1:53,11:3 C | T |
|       |    | ## | 0 |                     |          |   |   |  |          | SOM GT:/0:24 0/1:37,5:34 C | T |
| 2E-04 |    |    |   |                     |          |   |   |  |          | SOM GT:/0:8,(0/1:5,2:37: C | T |
|       |    |    |   |                     |          |   |   |  | 4.7 3.36 | SOM GT:/0:41 0/1:53,8:37 A | C |
|       |    |    |   |                     |          |   |   |  |          | SOM GT:/0:39 0/1:58,8:37 G | A |
| 4E-04 |    |    |   |                     |          |   |   |  | 0        | SOM GT:/0:9,(0/1:11,5:34 C | T |
|       |    |    |   |                     |          |   |   |  |          | SOM GT:/0:71 0/1:113,17 C  | T |
|       | ## | ## | 0 | 0.0 0.9971.0,D1,D   | 5.9 5.76 |   |   |  |          | SOM GT:/0:11 0/1:173,27 G  | A |
|       | ## | 0  | 0 |                     |          |   |   |  |          | SOM GT:/0:15 0/1:33,6:37 G | A |
|       | ## | ## | 0 |                     |          |   |   |  |          | SOM GT:/0:21 0/1:32,5:37 C | T |
|       |    |    |   | 0.5 0.0010.0040.99  | 5.9      |   |   |  |          | SOM GT:/0:56 0/1:105,10 T  | C |

|                                               |                                |   |
|-----------------------------------------------|--------------------------------|---|
| . . ## 0 0.0 0.997 1.0,D 1.00 5.4 5.22 . .    | SOM GT:/0:63 0/1:131,21 G      | A |
| . ## 0 0 0.0 0.995 1.0,D 1.00 3.8 3.80 . .    | SOM GT:/0:58 0/1:89,14:3 G     | A |
| . . ## 0 . . . . . . . . . .                  | SOM GT:/0:13 0/1:256,97 G      | A |
| . . . . . . . . . . . . . . . .               | SOM GT:/0:38 0/1:66,9:35 G     | A |
| . . . . . . . . . . . . . . . .               | SOM GT:/0:72 0/1:119,22 C      | T |
| . . . . . . . . . . . . . . . .               | SOM GT:/0:26 0/1:27,5:37 G     | A |
| . . ## 0 0.0 0.995 1.0,D 1.00 4.3 3.99 . .    | SOM GT:/0:33 0/1:56,7:37 G     | A |
| . . ## 0 0.7 0.001 0.003 1.00 . . . . .       | SOM GT:/0:82 0/1:124,26 C      | T |
| . . . . . . . . . . . . . . . .               | SOM GT:/0:9,(0/1:7,3:37: C     | T |
| . . . . . . . . . . . . . . . .               | SOM GT:/0:33 0/1:76,4:37 G     | T |
| . . . . . . . . . . . . . . . .               | 0 0 SOM GT:/0:12 0/1:12,4:37 C | T |
| . . . . . . . . . . . . . . . .               | SOM GT:/0:15 0/1:267,12 A      | G |
| . . ## . 0.1 0.001 0.0,B 1,N 3 . 0 0          | SOM GT:/0:77 0/1:106,12 C      | A |
| 8E-04 . 0 0 0.0 0.168 0.545 0.99 5.5 3.45 . . | SOM GT:/0:82 0/1:152,22 C      | T |
| . . . . . . . . . . . . . . . .               | SOM GT:/0:30 0/1:63,16:3 C     | T |
| . . . . . . . . . . . . . . . .               | SOM GT:/0:28 0/1:34,4:37 T     | C |
| . . ## . . . . . . . . . . . . . . .          | SOM GT:/0:30 0/1:67,6:37 G     | A |
| . . ## 0 . . . . . . . . . . . . . . .        | SOM GT:/0:86 0/1:149,23 G      | A |
| . . . . . . . . . . . . . . . .               | SOM GT:/0:13 0/1:206,40 A      | G |
| . . ## 0 . . . . . . . . . . . . . . .        | SOM GT:/0:17 0/1:40,6:37 G     | A |
| . . . . . . . . . . . . . . . .               | SOM GT:/0:9,(0/1:10,5:37 C     | T |
| . . . . . . . . . . . . . . . .               | SOM GT:/0:9,(0/1:12,4:37 T     | A |
| . . . . . . . . . . . . . . . .               | SOM GT:/0:18 0/1:58,7:37 C     | A |
| . . . . . . . . . . . . . . . .               | SOM GT:/0:38 0/1:60,16:3 C     | A |
| 0.006 . 0 0 . . . . . . . . . . . . . . .     | SOM GT:/0:14 0/1:252,32 G      | A |
| . . . . . . . . . . . . . . . .               | SOM GT:/0:40 0/1:82,18:3 C     | T |
| . . . . . . . . . . . . . . . .               | SOM GT:/0:36 0/1:59,10:3 G     | A |
| . . . . . . . . . . . . . . . .               | SOM GT:/0:44 0/1:68,11:3 T     | C |
| . . . . . . . . . . . . . . . .               | SOM GT:/0:33 0/1:47,7:35 G     | T |
| . . . . . . . . . . . . . . . .               | SOM GT:/0:37 0/1:59,12:3 G     | T |
| . . ## 0 . . . . . . . . . . . . . . .        | SOM GT:/0:15 0/1:279,44 G      | A |
| . . . . . . . . . . . . . . . .               | SOM GT:/0:67 0/1:111,22 A      | T |
| . . . . . . . . . . . . . . . .               | SOM GT:/0:15 0/1:14,6:35 T     | C |
| . . . . . . . . . . . . . . . .               | SOM GT:/0:32 0/1:64,10:3 G     | T |
| . . . . . . . . . . . . . . . .               | SOM GT:/0:46 0/1:73,12:3 T     | C |
| . . ## ## 0 . . . . . . . . . . . . . . .     | SOM GT:/0:53 0/1:89,13:3 C     | T |
| . . . . . . . . . . . . . . . .               | SOM GT:/0:26 0/1:20,3:37 A     | G |
| 2E-04 . ## 0 0.0 0.091 0.417 1,D 3.1 2.69 . . | SOM GT:/0:59 0/1:88,7:37 C     | T |
| 2E-04 . . . . . . . . . . . . . . .           | 0 . SOM GT:/0:15 0/1:40,9:37 C | T |
| . . . . . . . . . . . . . . . .               | SOM GT:/0:16 0/1:23,5:37 A     | G |
| . . . . . . . . . . . . . . . .               | SOM GT:/0:10 0/1:185,33 C      | T |
| . . . . . . . . . . . . . . . .               | SOM GT:/0:21 0/1:30,8:33 C     | T |
| . . ## 0 0.1 0.816 0.998 1,D 2.7 2.21 . .     | SOM GT:/0:18 0/1:35,15:3 C     | T |
| . . ## ## 0 . . . . . . . . . . . . . . .     | SOM GT:/0:27 0/1:45,4:37 C     | T |
| . . . . . . . . . . . . . . . .               | SOM GT:/0:92 0/1:149,19 A      | G |
| . . . . . . . . . . . . . . . .               | SOM GT:/0:65 0/1:118,13 C      | T |
| . . . . . . . . . . . . . . . .               | SOM GT:/0:21 0/1:39,9:35 G     | T |
| 6E-04 ## 0 0 . . . . . . . . . . . . . . .    | SOM GT:/0:95 0/1:149,15 G      | A |
| . . . . . . . . . . . . . . . .               | SOM GT:/0:14 0/1:22,3:37 C     | A |
| . . . . . . . . . . . . . . . .               | SOM GT:/0:9,(0/1:17,6:37 G     | T |
| . . ## 0 . . . . . . . . . . . . . . .        | SOM GT:/0:49 0/1:69,12:3 G     | A |
| . . 0 0 . . . . . . . . . . . . . . .         | SOM GT:/0:34 0/1:54,9:37 G     | A |
| . . . . . . . . . . . . . . . .               | SOM GT:/0:38 0/1:53,11:3 G     | A |
| . . . . . . . . . . . . . . . .               | SOM GT:/0:98 0/1:163,34 G      | A |

|       |   |    |     |       |       |       |      |      |                            |                            |   |
|-------|---|----|-----|-------|-------|-------|------|------|----------------------------|----------------------------|---|
| .     | . | .  | .   | .     | .     | .     | .    | .    | SOM GT:/0:15 0/1:20,4:37 C | T                          |   |
| .     | . | .  | .   | .     | .     | .     | .    | .    | SOM GT:/0:12 0/1:10,3:37 G | A                          |   |
| .     | . | .  | 0.0 | 0.853 | 0.984 | 0.99  | 4.3  | 3.06 | SOM GT:/0:56 0/1:85,15:3 A | G                          |   |
| .     | . | .  | 0.2 | 0.993 | 0.999 | 1,D   | 5.4  | 3.15 | SOM GT:/0:38 0/1:62,8:37 G | T                          |   |
| .     | . | .  | .   | .     | .     | .     | 3.5  | .    | SOM GT:/0:21 0/1:358,73 C  | T                          |   |
| .     | . | .  | .   | .     | .     | .     | 4.2  | 2.86 | SOM GT:/0:25 0/1:75,11:3 T | C                          |   |
| .     | . | .  | .   | .     | .     | .     | .    | .    | SOM GT:/0:20 0/1:28,5:37 G | A                          |   |
| .     | . | ## | 0   | .     | .     | .     | .    | .    | SOM GT:/0:31 0/1:54,6:37 G | A                          |   |
| .     | . | .  | .   | .     | .     | .     | .    | .    | SOM GT:/0:15 0/1:21,6:37 C | T                          |   |
| .     | . | .  | .   | .     | .     | .     | .    | .    | SOM GT:/0:81 0/1:150,23 C  | T                          |   |
| .     | . | .  | 0.2 | 0.002 | 0.02  | 1,D   | .    | .    | SOM GT:/0:13 0/1:32,10:3 C | T                          |   |
| .     | . | .  | 0.3 | .     | .     | 1.00  | 3.7  | 1.88 | SOM GT:/0:60 0/1:125,18 G  | T                          |   |
| .     | . | .  | .   | .     | .     | .     | .    | .    | SOM GT:/0:12 0/1:19,3:37 C | T                          |   |
| .     | . | ## | 0   | .     | .     | .     | .    | 0 0  | SOM GT:/0:66 0/1:129,16 C  | T                          |   |
| .     | . | .  | .   | .     | .     | .     | .    | .    | SOM GT:/0:20 0/1:43,5:37 G | T                          |   |
| .     | . | ## | 0   | .     | .     | .     | .    | .    | SOM GT:/0:13 0/1:209,32 G  | A                          |   |
| .     | . | .  | .   | .     | .     | .     | .    | .    | SOM GT:/0:31 0/1:54,15:3 C | A                          |   |
| .     | . | ## | 0   | 0.3   | 0.024 | 0.104 | 0.99 | 2.3  | 1.34                       | SOM GT:/0:99 0/1:171,33 G  | A |
| .     | . | ## | 0   | .     | .     | .     | .    | .    | SOM GT:/0:84 0/1:137,21 C  | T                          |   |
| .     | . | .  | .   | .     | .     | .     | .    | .    | SOM GT:/0:22 0/1:42,8:37 G | A                          |   |
| .     | . | .  | .   | .     | .     | .     | .    | .    | SOM GT:/0:38 0/1:48,12:3 C | T                          |   |
| .     | . | .  | .   | .     | .     | .     | 0.1  | 0.2  | SOM GT:/0:8,0/1:9,3:37 G   | A                          |   |
| .     | . | .  | .   | .     | .     | .     | .    | .    | SOM GT:/0:12 0/1:212,15 C  | T                          |   |
| .     | . | .  | .   | .     | .     | .     | .    | .    | SOM GT:/0:24 0/1:29,4:37 A | G                          |   |
| .     | . | .  | .   | .     | .     | .     | .    | .    | SOM GT:/0:96 0/1:167,17 A  | G                          |   |
| .     | . | .  | .   | .     | .     | .     | .    | .    | SOM GT:/0:28 0/1:23,3:37 C | T                          |   |
| .     | . | .  | .   | .     | .     | .     | .    | .    | SOM GT:/0:46 0/1:73,10:3 G | A                          |   |
| .     | . | .  | .   | .     | .     | .     | .    | .    | SOM GT:/0:40 0/1:51,9:37 G | A                          |   |
| .     | . | .  | .   | .     | .     | .     | .    | 0    | SOM GT:/0:60 0/1:93,9:37 C | T                          |   |
| .     | . | 0  | 0   | 0.10  | .     | 1,N   | .    | 0    | SOM GT:/0:78 0/1:155,26 G  | A                          |   |
| .     | . | .  | .   | .     | .     | .     | .    | .    | SOM GT:/0:75 0/1:125,24 G  | A                          |   |
| .     | . | .  | .   | .     | .     | .     | .    | .    | SOM GT:/0:11 0/1:7,3:37 G  | A                          |   |
| .     | . | .  | .   | .     | .     | .     | .    | .    | SOM GT:/0:25 0/1:37,7:37 T | C                          |   |
| .     | . | .  | .   | .     | .     | .     | .    | .    | SOM GT:/0:13 0/1:187,29 A  | G                          |   |
| .     | . | .  | .   | .     | .     | .     | .    | .    | SOM GT:/0:24 0/1:48,6:37 G | A                          |   |
| .     | 0 | ## | 0   | .     | .     | .     | .    | 0    | SOM GT:/0:70 0/1:113,19 C  | T                          |   |
| .     | . | .  | 0.0 | 0.91  | 0.967 | 1,D   | 4    | 4.18 | SOM GT:/0:11 0/1:67,16:3 A | G                          |   |
| .     | . | ## | 0   | .     | .     | .     | .    | 0    | SOM GT:/0:55 0/1:35,4:34 C | T                          |   |
| .     | . | .  | .   | .     | .     | .     | .    | .    | SOM GT:/0:24 0/1:26,3:37 G | T                          |   |
| .     | . | .  | 0.1 | .     | .     | 1,N   | .    | 0    | SOM GT:/0:14 0/1:238,9:3 G | A                          |   |
| .     | . | .  | .   | .     | .     | .     | .    | 0    | SOM GT:/0:40 0/1:66,9:32 C | T                          |   |
| .     | . | .  | .   | .     | .     | .     | .    | 0.2  | 0.3                        | SOM GT:/0:10 0/1:14,6:33 A | G |
| .     | . | .  | .   | .     | .     | .     | .    | .    | SOM GT:/0:45 0/1:67,8:37 T | C                          |   |
| .     | . | .  | .   | .     | .     | .     | .    | .    | SOM GT:/0:16 0/1:331,67 C  | T                          |   |
| .     | . | .  | .   | .     | .     | .     | .    | .    | SOM GT:/0:19 0/1:46,4:37 A | T                          |   |
| .     | . | .  | .   | .     | .     | .     | .    | .    | SOM GT:/0:29 0/1:31,9:37 C | T                          |   |
| .     | . | .  | .   | .     | .     | .     | 2.3  | .    | SOM GT:/0:11 0/1:30,7:37 G | A                          |   |
| .     | . | .  | 0.1 | 0.924 | 1.0   | D     | 1.00 | 4.5  | 2.61                       | SOM GT:/0:76 0/1:142,32 G  | A |
| .     | . | .  | .   | .     | .     | .     | 2.07 | .    | SOM GT:/0:39 0/1:48,7:37 G | T                          |   |
| 0.001 | 0 | 0  | 0   | .     | .     | .     | .    | .    | SOM GT:/0:86 0/1:175,42 C  | T                          |   |
| .     | . | .  | .   | .     | .     | .     | .    | .    | SOM GT:/0:87 0/1:117,24 G  | A                          |   |
| .     | . | ## | 0   | .     | .     | .     | .    | .    | SOM GT:/0:60 0/1:93,12:3 G | A                          |   |
| .     | . | ## | 0   | .     | .     | 1,A   | 3.8  | 5.48 | SOM GT:/0:55 0/1:101,14 C  | T                          |   |
| 2E-04 | . | ## | 0   | .     | .     | 1,D   | 4.3  | 7.65 | SOM GT:/0:12 0/1:186,22 C  | T                          |   |



|       |    |      |            |            |            |       |      |      |                             |                            |                            |   |
|-------|----|------|------------|------------|------------|-------|------|------|-----------------------------|----------------------------|----------------------------|---|
|       |    |      |            |            |            |       |      |      | SOM GT:/0:30 0/1:37,5:37 G  | A                          |                            |   |
| 2E-04 |    |      |            |            |            |       |      |      | SOM GT:/0:16 0/1:198,35 G   | A                          |                            |   |
|       |    |      |            |            |            |       |      |      | SOM GT:/0:48 0/1:60,10:3 G  | A                          |                            |   |
|       |    |      | 0.0,0.99,1 | 1.0,D 1,D  | 4.4        | 3.92  |      |      | SOM GT:/0:10 0/1:215,30 G   | T                          |                            |   |
|       |    |      |            |            |            |       |      |      | SOM GT:/0:16 0/1:31,3:37 A  | G                          |                            |   |
|       | ## | 0    | 0.0        | 0.4740.969 | 0.96       | 5.8   | 4.26 |      | DB;S GT:/0:60 0/1:90,18:3 G | A                          |                            |   |
| 4E-04 | 0  | 0    | 0.0        | 0.997      | 1.0,D 1,D  | 5.7   | 5.61 |      | SOM GT:/0:10 0/1:186,27 C   | T                          |                            |   |
|       |    |      |            |            |            |       |      |      | SOM GT:/0:39 0/1:69,14:3 G  | T                          |                            |   |
|       |    |      |            |            |            |       |      |      | SOM GT:/0:15 0/1:27,3:37 A  | G                          |                            |   |
|       |    |      |            |            |            |       |      |      | SOM GT:/0:42 0/1:66,8:37 G  | T                          |                            |   |
|       |    |      |            |            | 1,D        | 6     | 3.25 |      | SOM GT:/0:27 0/1:37,6:37 A  | G                          |                            |   |
|       | ## | 0    |            |            |            |       |      |      | SOM GT:/0:64 0/1:106,21 G   | A                          |                            |   |
|       |    |      |            |            |            |       |      |      | SOM GT:/0:17 0/1:21,5:34 G  | T                          |                            |   |
|       |    |      | 0.0,0.999  | 1.0,D 1,D  | 5.5        | 3.28  |      |      | SOM GT:/0:67 0/1:110,14 T   | C                          |                            |   |
|       | ## | 0    | 0.0        | 0.999      | 1.0,D 1,D  | 5.6   | 5.38 |      | SOM GT:/0:42 0/1:59,9:37 G  | A                          |                            |   |
|       | ## | 0    | 0.0        | 0.984      | 1.0,D 0.98 | 2.8   | 3.48 | 0    | 0                           | SOM GT:/0:42 0/1:62,13:3 C | T                          |   |
|       |    |      | 0.1        | 0.005      | 0.001      | 1,N   | 2.8  |      |                             | SOM GT:/0:32 0/1:37,4:34 C | G                          |   |
| 2E-04 | ## | 0    |            |            |            | 3.7   |      |      |                             | SOM GT:/0:71 0/1:122,18 C  | T                          |   |
|       |    |      |            |            |            |       |      |      |                             | SOM GT:/0:15 0/1:21,6:37 G | A                          |   |
|       |    |      |            |            |            |       |      |      |                             | SOM GT:/0:27 0/1:48,8:38 T | C                          |   |
|       |    |      |            |            |            | 3.3   | 3.65 |      |                             | SOM GT:/0:54 0/1:62,13:3 T | C                          |   |
|       | ## | 0    |            |            |            |       |      |      |                             | SOM GT:/0:32 0/1:64,16:3 C | T                          |   |
|       |    |      |            |            |            |       |      |      |                             | SOM GT:/0:61 0/1:105,10 C  | T                          |   |
| 2E-04 |    |      |            |            |            |       |      | 0    | 0                           | SOM GT:/0:23 0/1:35,11:3 C | T                          |   |
|       |    |      |            |            |            |       |      |      |                             | SOM GT:/0:34 0/1:44,12:3 C | A                          |   |
|       |    |      | 0.1        | 0.998      | 1.0,D 1,D  | 6     | 4.74 |      |                             | SOM GT:/0:55 0/1:73,10:3 G | A                          |   |
|       |    |      |            |            |            |       |      |      |                             | SOM GT:/0:76 0/1:143,25 C  | A                          |   |
|       |    |      |            |            |            |       |      |      |                             | SOM GT:/0:8,(0/1:11,6:37 G | A                          |   |
|       |    |      |            |            |            |       |      | 0    |                             | SOM GT:/0:69 0/1:70,5:37 C | T                          |   |
|       |    |      |            |            |            |       |      | 0    |                             | SOM GT:/0:64 0/1:70,5:37 C | T                          |   |
|       |    |      |            |            |            |       |      |      |                             | SOM GT:/0:14 0/1:20,6:32 G | A                          |   |
|       |    |      |            |            |            |       |      |      |                             | SOM GT:/0:12 0/1:19,6:37 C | T                          |   |
|       |    |      |            |            |            |       |      | 0    | 0                           | SOM GT:/0:46 0/1:110,6:3 A | G                          |   |
|       |    |      |            |            |            |       |      |      |                             | SOM GT:/0:41 0/1:61,15:3 G | T                          |   |
|       |    |      |            |            |            | 2.5   | 1.34 |      |                             | SOM GT:/0:35 0/1:527,98 C  | T                          |   |
|       | 0  | ##   | 0          |            |            |       |      |      |                             | SOM GT:/0:10 0/1:159,25 C  | T                          |   |
|       |    |      |            |            |            |       |      |      |                             | SOM GT:/0:15 0/1:290,14 G  | A                          |   |
| 2E-04 | ## | 0    |            |            |            |       |      | 0    |                             | SOM GT:/0:58 0/1:108,20 G  | A                          |   |
|       |    |      |            |            |            |       |      |      |                             | SOM GT:/0:14 0/1:20,7:37 T | C                          |   |
|       |    |      |            |            |            |       |      |      |                             | SOM GT:/0:9,(0/1:17,3:37 C | T                          |   |
|       | 0  | 1.0, |            |            | 1,N        |       |      |      |                             | SOM GT:/0:29 0/1:38,6:28 A | G                          |   |
|       |    |      |            |            |            |       |      |      |                             | SOM GT:/0:23 0/1:39,4:37 G | A                          |   |
|       | ## | ##   | 0          | 0.0        | 0.458      | 0.901 | 1.00 | 5.4  | 3.98                        | 0                          | SOM GT:/0:14 0/1:233,40 C  | T |
|       |    |      | 0.0        | 0.791      | 0.999      | 1,D   | 5.1  | 4.69 |                             |                            | SOM GT:/0:86 0/1:149,23 G  | A |
|       |    |      |            |            |            |       |      |      |                             |                            | SOM GT:/0:27 0/1:72,18:3 A | T |
|       | ## |      |            |            |            |       |      | 0    |                             |                            | SOM GT:/0:10 0/1:171,36 G  | A |
|       |    |      |            |            |            | 1.71  |      |      |                             |                            | SOM GT:/0:46 0/1:66,10:3 C | T |
|       | 0  | ##   | 0          |            |            |       |      |      |                             |                            | SOM GT:/0:10 0/1:200,28 C  | T |
| 1E-03 |    |      |            |            |            |       |      | 0    |                             |                            | SOM GT:/0:18 0/1:38,7:37 T | C |
|       |    |      |            |            |            |       |      |      |                             |                            | SOM GT:/0:80 0/1:164,33 T  | C |
|       |    |      |            |            |            |       |      |      |                             |                            | SOM GT:/0:35 0/1:54,5:37 C | T |
|       |    |      |            |            |            |       |      |      |                             |                            | SOM GT:/0:45 0/1:59,6:32 G | T |
|       | ## | 0    | 0.0        | 0.998      | 1.0,D 1.00 | 5.7   | 3.91 |      |                             |                            | SOM GT:/0:40 0/1:68,15:3 G | A |
|       |    |      |            |            |            | 3.4   |      |      |                             |                            | SOM GT:/0:23 0/1:37,6:37 C | A |

|       |    |    |    |       |       |         |        |          |                             |   |
|-------|----|----|----|-------|-------|---------|--------|----------|-----------------------------|---|
| .     | .  | .  | .  | .     | .     | .       | .      | .        | SOM GT:/0:59 0/1:612,25 G   | A |
| .     | .  | .  | .  | .     | .     | .       | .      | .        | SOM GT:/0:73 0/1:768,52 G   | A |
| .     | .  | .  | .  | .     | .     | .       | .      | .        | SOM GT:/0:17 0/1:248,63 C   | T |
| .     | .  | .  | .  | .     | .     | .       | .      | .        | SOM GT:/0:29 0/1:428,14 A   | G |
| .     | .  | ## | 0  | 0.002 | 0.001 | 0.77    | 3.5    | .        | SOM GT:/0:68 0/1:112,25 G   | A |
| .     | .  | .  | .  | 0.11  | 0.143 | 0.302   | 1,N    | .        | SOM GT:/0:11 0/1:208,32 G   | T |
| .     | .  | .  | .  | .     | .     | .       | .      | .        | SOM GT:/0:12 0/1:216,42 G   | A |
| .     | .  | .  | .  | .     | .     | .       | .      | .        | SOM GT:/0:9,(0/1:5,2:37) G  | C |
| 2E-04 | .  | ## | 0  | 0.0   | 0.024 | 0.491   | 1.00   | .        | SOM GT:/0:79 0/1:128,17 C   | T |
| .     | .  | 0  | 0  | .     | .     | .       | .      | 0        | DB;S GT:/0:66 0/1:123,8:3 C | T |
| .     | .  | ## | 0  | 0.2   | 0.001 | 0.006   | 1,N    | 1.60     | SOM GT:/0:46 0/1:74,11:3 G  | A |
| 2E-04 | ## | ## | 0  | 0.0   | 0.862 | 0.999   | 1,D    | 4.2 3.34 | SOM GT:/0:17 0/1:298,68 C   | T |
| .     | .  | ## | ## | 0     | .     | .       | .      | 0        | SOM GT:/0:25 0/1:458,78 C   | T |
| .     | .  | .  | .  | .     | .     | .       | .      | 3        | SOM GT:/0:31 0/1:36,6:32 G  | T |
| .     | .  | .  | .  | .     | .     | .       | .      | .        | SOM GT:/0:8,(0/1:14,6:37) C | A |
| .     | .  | ## | .  | .     | .     | .       | .      | .        | SOM GT:/0:97 0/1:178,29 C   | T |
| .     | .  | .  | .  | .     | .     | .       | .      | .        | SOM GT:/0:28 0/1:63,8:37 G  | A |
| .     | .  | .  | .  | 0.0   | 0.608 | 0.958   | 1,N    | 2.8 2.07 | SOM GT:/0:44 0/1:42,13:3 A  | T |
| 2E-04 | .  | .  | .  | .     | .     | .       | .      | .        | SOM GT:/0:11 0/1:13,4:37 C  | T |
| .     | .  | .  | .  | 0.3   | 0.499 | 0.833   | 0.98   | 2.6 1.55 | SOM GT:/0:65 0/1:140,28 G   | A |
| .     | .  | ## | 0  | .     | .     | .       | .      | .        | SOM GT:/0:43 0/1:90,19:3 C  | T |
| .     | .  | .  | .  | 0.0   | 0.999 | 1.0     | D 1,D  | 5.2 5.25 | SOM GT:/0:12 0/1:214,40 G   | A |
| 4E-04 | .  | .  | .  | .     | .     | .       | .      | 0        | SOM GT:/0:83 0/1:118,23 G   | A |
| .     | .  | 0  | 0  | 0.0   | 0.999 | 1.0     | D 1,D  | 4.8 4.71 | SOM GT:/0:69 0/1:120,23 C   | T |
| .     | .  | .  | .  | .     | .     | .       | .      | 0        | SOM GT:/0:22 0/1:26,11:3 C  | T |
| .     | .  | ## | ## | 0     | 0.0   | 0.999   | 1.0    | D 1.00   | SOM GT:/0:20 0/1:326,55 C   | T |
| .     | .  | .  | .  | .     | .     | .       | .      | 1.74     | SOM GT:/0:99 0/1:138,33 T   | A |
| 4E-04 | ## | ## | 0  | .     | .     | .       | .      | 0        | SOM GT:/0:45 0/1:87,24:3 G  | A |
| .     | .  | .  | .  | .     | .     | .       | .      | .        | SOM GT:/0:30 0/1:50,12:3 C  | A |
| .     | .  | ## | 0  | 0.4   | 0.0   | B 0.001 | 1,N    | .        | SOM GT:/0:10 0/1:188,35 G   | A |
| .     | .  | .  | .  | .     | .     | .       | .      | .        | SOM GT:/0:43 0/1:93,15:3 G  | A |
| .     | .  | .  | .  | .     | .     | .       | .      | .        | SOM GT:/0:32 0/1:55,8:37 T  | C |
| .     | .  | .  | .  | .     | .     | .       | .      | .        | SOM GT:/0:66 0/1:92,15:3 G  | A |
| 0.003 | .  | .  | .  | .     | .     | .       | .      | 0 0      | SOM GT:/0:30 0/1:40,4:37 C  | T |
| .     | .  | .  | .  | .     | .     | .       | .      | .        | SOM GT:/0:48 0/1:76,11:3 A  | G |
| .     | .  | ## | 0  | .     | .     | .       | .      | .        | SOM GT:/0:36 0/1:59,8:37 C  | T |
| 0.002 | .  | 0  | 0  | 0.3   | 0.0   | B 0.0   | B 1,N  | .        | SOM GT:/0:52 0/1:92,27:3 G  | A |
| .     | .  | .  | .  | 0.0   | 0.891 | 0.997   | 1.00   | 5.7 3.29 | SOM GT:/0:61 0/1:90,18:3 C  | A |
| 4E-04 | .  | .  | .  | .     | .     | .       | .      | .        | SOM GT:/0:14 0/1:23,3:37 T  | A |
| 2E-04 | .  | .  | .  | .     | .     | .       | .      | .        | SOM GT:/0:28 0/1:38,9:37 G  | A |
| .     | .  | ## | ## | 0     | .     | .       | .      | .        | SOM GT:/0:22 0/1:408,78 C   | T |
| .     | .  | 0  | 0  | 0.0   | 0.0   | B 0.003 | 1,N    | .        | SOM GT:/0:90 0/1:140,39 C   | T |
| .     | .  | .  | .  | 0.0   | 0.997 | 0.999   | 0.96   | 4.8 2.03 | SOM GT:/0:10 0/1:173,41 G   | T |
| 2E-04 | .  | ## | 0  | 0.2   | 0.0   | B 0.0   | B 1,N  | .        | SOM GT:/0:12 0/1:193,34 G   | A |
| .     | .  | .  | .  | .     | .     | .       | .      | .        | SOM GT:/0:37 0/1:55,11:3 T  | C |
| .     | .  | .  | .  | .     | .     | .       | .      | .        | SOM GT:/0:28 0/1:55,8:37 G  | A |
| .     | .  | ## | 0  | .     | .     | .       | .      | 2.57     | SOM GT:/0:27 0/1:38,8:37 A  | G |
| 2E-04 | .  | .  | .  | .     | .     | .       | .      | 2.86     | SOM GT:/0:31 0/1:53,7:37 G  | A |
| .     | .  | 0  | 0  | .     | .     | .       | .      | .        | SOM GT:/0:81 0/1:61,13:3 G  | A |
| .     | .  | .  | .  | .     | .     | .       | .      | 5.6 2.61 | SOM GT:/0:14 0/1:29,8:35 C  | T |
| .     | .  | .  | .  | .     | .     | .       | .      | .        | SOM GT:/0:16 0/1:17,5:37 C  | T |
| .     | .  | .  | .  | .     | .     | .       | .      | .        | SOM GT:/0:22 0/1:20,5:37 G  | A |
| .     | .  | .  | .  | .     | .     | .       | .      | 2.1      | SOM GT:/0:10 0/1:150,17 T   | C |
| .     | .  | 0  | 0  | 0.0   | 0.0   | B 0.0   | B 1.00 | 4.2 2.45 | DB;S GT:/0:91 0/1:157,7:3 A | T |

|       |    |    |       |       |       |       |      |      |                                  |                           |   |
|-------|----|----|-------|-------|-------|-------|------|------|----------------------------------|---------------------------|---|
|       | 0  | 0  | 0.6   | 0.002 | 0.004 | 1,N   | 2.2  | 0    | SOM GT:/0:18 0/1:304,52 G        | A                         |   |
|       | ## | 0  |       |       |       |       |      |      | SOM GT:/0:72 0/1:101,26 G        | A                         |   |
|       |    |    | 0.997 | 1.0,D | 1.00  |       | 3.2  | 2.86 | SOM GT:/0:50 0/1:81,6:37 C       | A                         |   |
|       | ## | ## |       |       |       |       |      |      | SOM GT:/0:82 0/1:155,28 C        | T                         |   |
|       |    |    | 0.0   | 0.999 | 1.0,D | 1,D   | 5.7  | 4.84 | SOM GT:/0:60 0/1:80,16:3 G       | A                         |   |
|       |    |    | 0.3   | 0.755 | 0.998 | 0.99  | 4.6  | 2.75 | SOM GT:/0:77 0/1:126,24 C        | T                         |   |
|       |    |    |       |       |       |       |      |      | SOM GT:/0:22 0/1:29,4:37 C       | T                         |   |
|       |    |    |       |       |       |       |      |      | SOM GT:/0:19 0/1:33,3:37 G       | T                         |   |
|       |    |    | 0.0   | 0.999 | 1.0,D | 0.73  | 3.6  | 4.00 | SOM GT:/0:55 0/1:93,17:3 G       | A                         |   |
|       |    |    |       |       |       |       |      |      | SOM GT:/0:55 0/1:74,12:3 C       | T                         |   |
| 2E-04 | ## | ## | 0     | 0.0   | 0.99  | 1.0,D | 1.00 | 5.2  | 3.22                             | SOM GT:/0:11 0/1:157,33 G | A |
| 0.006 |    |    |       |       |       |       |      |      | 0 0 SOM GT:/0:25 0/1:26,7:3E A   | T                         |   |
|       |    |    | 0.4   |       |       | 1,N   |      |      | SOM GT:/0:27 0/1:20,5:37 G       | A                         |   |
|       |    |    | 0.0   | 0.997 | 1.0,D | 1,D   | 5.8  | 3.66 | SOM GT:/0:11 0/1:179,38 C        | T                         |   |
|       |    |    |       |       |       |       |      | 1.23 | SOM GT:/0:52 0/1:91,5:37 T       | C                         |   |
| 2E-04 |    | ## | 0     | 0.0   | 0.923 | 1.0,D | 0.99 | 3.4  | 4.90                             | SOM GT:/0:13 0/1:223,31 G | A |
|       |    |    |       |       |       |       |      |      | SOM GT:/0:68 0/1:96,14:3 G       | T                         |   |
|       |    |    |       |       |       |       |      |      | SOM GT:/0:8,(0/1:6,2:37: G       | T                         |   |
|       |    | ## | 0     | 0.2   | 0.469 | 0.99, | 0.89 | 4.5  | 0 0 SOM GT:/0:13 0/1:198,45 C    | T                         |   |
|       |    |    |       |       |       |       |      |      | SOM GT:/0:37 0/1:57,9:37 G       | A                         |   |
|       |    |    |       |       |       |       | 3.4  | 2.32 | SOM GT:/0:67 0/1:106,21 T        | C                         |   |
|       |    |    |       |       |       |       |      |      | SOM GT:/0:43 0/1:82,17:3 G       | T                         |   |
|       |    |    |       |       |       |       |      |      | SOM GT:/0:10 0/1:203,22 C        | A                         |   |
| 2E-04 |    |    |       |       |       |       |      |      | 0 0 DB;GT:/0:48 0/1:62,4:37 C    | T                         |   |
| 0.215 |    |    |       |       |       |       |      |      | 0. SOM GT:/0:24 0/1:29,10:3 A    | G                         |   |
|       |    |    |       |       |       |       | 2.7  |      | SOM GT:/0:23 0/1:350,28 A        | G                         |   |
|       |    |    |       |       |       |       |      |      | 0. SOM GT:/0:49 0/1:83,6:37 A    | G                         |   |
| 0.02  |    |    |       |       |       |       |      |      | 0 0.1 SOM GT:/0:8,(0/1:3,3:37: G | C                         |   |
|       |    |    |       |       |       |       |      |      | SOM GT:/0:9,(0/1:5,2:37: C       | A                         |   |
|       |    |    |       |       |       |       |      |      | SOM GT:/0:21 0/1:36,3:37 A       | C                         |   |
|       |    |    |       |       |       |       |      |      | SOM GT:/0:9,(0/1:13,3:37 C       | G                         |   |
|       |    |    |       |       |       |       |      |      | 0. DB;GT:/0:19 0/1:112,5:3 A     | C                         |   |
|       |    |    |       |       |       |       |      |      | 0. DB;GT:/0:19 0/1:193,8:3 C     | T                         |   |
|       |    |    |       |       |       |       |      |      | 0. DB;GT:/0:22 0/1:245,9:3 T     | G                         |   |
|       |    |    |       |       |       |       |      |      | DB;GT:/0:19 0/1:171,7:3 C        | T                         |   |
|       |    |    |       |       |       |       |      |      | 0. DB;GT:/0:28 0/1:424,22 G      | C                         |   |
|       |    |    |       |       |       |       |      |      | 0. DB;GT:/0:39 0/1:679,33 G      | C                         |   |
|       |    |    |       |       |       |       |      |      | SOM GT:/0:23 0/1:292,12 A        | G                         |   |
|       |    |    |       |       |       |       |      |      | 0. SOM GT:/0:30 0/1:265,9:3 A    | C                         |   |
|       |    |    |       |       |       |       |      |      | 0 0 DB;GT:/0:24 0/1:213,8:3 A    | G                         |   |
|       |    |    |       |       |       |       |      |      | DB;GT:/0:29 0/1:233,11 A         | G                         |   |
|       |    |    |       |       |       |       |      |      | 0. DB;GT:/0:34 0/1:228,8:3 T     | G                         |   |
|       |    |    |       |       |       |       |      |      | DB;GT:/0:35 0/1:364,12 A         | G                         |   |
|       |    |    |       |       |       |       |      |      | 0. DB;GT:/0:34 0/1:446,15 G      | C                         |   |
|       |    |    |       |       |       |       |      |      | 0. DB;GT:/0:37 0/1:502,15 T      | A                         |   |
|       |    |    |       |       |       |       |      |      | 0. DB;GT:/0:23 0/1:363,12 A      | T                         |   |
|       |    |    |       |       |       |       |      |      | 0. DB;GT:/0:27 0/1:221,16 T      | G                         |   |
|       |    |    |       |       |       |       |      |      | 0. SOM GT:/0:10 0/1:60,5:37 G    | T                         |   |
|       |    |    |       |       |       |       |      |      | 0. SOM GT:/0:13 0/1:142,6:3 G    | A                         |   |
|       |    |    |       |       |       |       |      |      | SOM GT:/0:10 0/1:99,7:37 T       | C                         |   |
|       |    |    |       |       |       |       |      |      | SOM GT:/0:10 0/1:24,3:37 T       | C                         |   |
|       | 0  | ## | 0     |       |       |       |      |      | SOM GT:/0:15 0/1:237,60 G        | A                         |   |
|       |    |    |       |       |       |       |      |      | SOM GT:/0:24 0/1:60,4:37 C       | A                         |   |
|       |    |    |       |       |       |       |      |      | SOM GT:/0:49 0/1:90,20:3 C       | A                         |   |

|       |       |   |       |       |       |      |     |      |       |                             |   |
|-------|-------|---|-------|-------|-------|------|-----|------|-------|-----------------------------|---|
|       |       |   | 0.1   | 0.006 | 0.002 | 1.00 |     | 1.43 |       | SOM GT:/0:50 0/1:91,17:3 G  | T |
|       |       |   |       |       |       |      |     |      |       | SOM GT:/0:25 0/1:29,12:3 A  | C |
|       |       |   |       |       |       |      |     |      |       | SOM GT:/0:47 0/1:66,12:3 G  | A |
| 4E-04 | 0     | 0 |       |       |       |      |     |      |       | SOM GT:/0:20 0/1:328,59 C   | T |
|       |       |   |       |       |       |      |     |      |       | SOM GT:/0:53 0/1:79,18:3 T  | C |
|       |       |   | 0.0   | 0.742 | 0.986 | 0.67 | 3.1 | 3.79 |       | SOM GT:/0:61 0/1:80,13:3 G  | T |
|       |       |   |       |       |       |      |     | 1.73 |       | SOM GT:/0:17 0/1:31,6:37 A  | G |
|       |       |   |       |       |       |      |     |      | 0     | SOM GT:/0:8,(0/1:9,3:37 A   | G |
|       |       |   | 0.1   | 0.821 | 0.996 | 1,N  |     | 1.95 |       | SOM GT:/0:93 0/1:195,41 C   | T |
|       |       |   |       |       |       |      |     |      |       | SOM GT:/0:30 0/1:50,5:37 A  | G |
|       | ##    | 0 |       |       |       |      |     |      | 0     | SOM GT:/0:13 0/1:180,35 C   | T |
| 2E-04 | ##    | 0 | 0.0   | 0.996 | 1.0,D | 1.00 | 5.3 | 3.77 |       | SOM GT:/0:89 0/1:125,24 G   | A |
|       |       |   |       |       |       |      | 2.2 | 1.30 |       | SOM GT:/0:60 0/1:95,9:34 G  | T |
|       | ##    | 0 | 0.0   | 0.819 | 0.996 | 1.00 |     | 3.55 |       | SOM GT:/0:48 0/1:98,10:3 C  | T |
|       | 0 ##  | 0 |       |       |       |      |     |      | 0     | SOM GT:/0:32 0/1:53,9:37 G  | A |
|       |       |   |       |       |       |      |     |      |       | SOM GT:/0:19 0/1:38,6:32 C  | A |
|       | ##    | 0 | 0.03, | 0.124 | 0.98  |      |     | 1.80 |       | SOM GT:/0:65 0/1:141,5:3 C  | T |
|       |       |   |       |       |       |      |     |      |       | SOM GT:/0:41 0/1:53,6:37 C  | A |
|       |       |   |       |       |       |      |     |      |       | SOM GT:/0:10 0/1:197,38 G   | A |
|       |       |   | 0.5   | 0.894 | 0.931 | 0.99 | 5.5 | 3.13 |       | SOM GT:/0:31 0/1:77,10:3 C  | T |
|       |       |   |       |       |       |      |     |      | 0 0   | SOM GT:/0:38 0/1:50,12:2 A  | G |
|       |       |   |       |       |       |      |     |      |       | SOM GT:/0:25 0/1:34,7:33 C  | T |
| 1E-03 |       |   |       |       |       |      |     |      |       | SOM GT:/0:38 0/1:71,13:3 C  | T |
|       | 0 ##  | 0 | 0.715 | 0.996 |       |      | 4.1 |      |       | SOM GT:/0:25 0/1:44,9:37 G  | A |
|       | 0     | 0 |       |       |       |      |     |      | 0 0   | SOM GT:/0:10 0/1:21,4:37 G  | T |
|       |       |   |       |       |       |      |     |      |       | SOM GT:/0:46 0/1:56,4:37 C  | T |
|       |       |   |       |       |       |      |     |      |       | SOM GT:/0:38 0/1:55,10:3 C  | T |
| 0.01  |       |   |       |       |       |      |     |      | 0 0   | SOM GT:/0:10 0/1:8,6:37 A   | G |
|       | 0     | 0 | 0.081 | 0.205 |       |      |     |      | 0     | SOM GT:/0:38 0/1:40,7:35 G  | A |
|       |       |   |       |       |       |      |     |      |       | SOM GT:/0:14 0/1:14,3:37 T  | C |
| 0.063 |       |   |       |       |       |      |     |      | 0.1 0 | DB;S GT:/0:34 0/1:56,4:37 C | T |
| 6E-04 | 0 ##  | 0 | 0.0   | 0.846 | 0.984 | 0.98 | 5.1 | 2.66 | 0     | SOM GT:/0:38 0/1:51,15:3 G  | A |
|       | ##    | 0 | 0.0   | 0.707 | 0.993 | 1.00 | 4   | 2.25 |       | SOM GT:/0:64 0/1:101,24 G   | A |
|       |       |   | 0.0   | 0.833 | 0.997 | 1.00 |     | 2.53 |       | SOM GT:/0:24 0/1:43,10:3 C  | T |
|       |       |   | 0.0,  | 1.0,D | 1.0,D | 1,D  | 4.7 | 4.17 |       | SOM GT:/0:14 0/1:224,47 T   | A |
| 2E-04 | ## ## | 0 |       |       |       |      |     |      | 0     | SOM GT:/0:11 0/1:226,39 C   | T |
|       |       |   |       |       |       |      |     |      |       | SOM GT:/0:58 0/1:96,17:3 T  | C |
| 2E-04 | ##    | 0 | 0.1   | 0.011 | 0.025 | 1,N  |     |      |       | SOM GT:/0:11 0/1:167,25 G   | A |
|       |       |   |       |       |       |      |     |      |       | SOM GT:/0:20 0/1:32,6:37 C  | T |
|       |       |   | 0.0   | 0.969 | 1.0,D | 1,D  | 4.7 | 4.08 |       | SOM GT:/0:13 0/1:272,45 C   | T |
|       |       |   |       |       |       |      |     |      |       | SOM GT:/0:70 0/1:107,13 C   | A |
| 2E-04 | ##    | 0 |       |       |       |      |     |      |       | SOM GT:/0:62 0/1:110,24 G   | A |
|       | ##    | 0 |       |       |       |      |     |      |       | SOM GT:/0:11 0/1:195,35 G   | A |
|       | ##    | 0 | 0.0   | 0.96, | 0.994 | 1.00 | 4.9 | 4.09 | 0     | SOM GT:/0:81 0/1:155,26 T   | C |
|       |       |   | 0.6   | 0.001 | 0.001 | 1,D  | 5.6 | 3.09 |       | SOM GT:/0:73 0/1:90,15:3 C  | T |
|       |       |   |       |       |       |      | 2.2 |      |       | SOM GT:/0:10 0/1:18,6:37 A  | G |
|       |       |   |       |       |       |      |     |      |       | SOM GT:/0:63 0/1:122,24 T   | C |
|       |       |   |       |       |       |      |     |      |       | SOM GT:/0:13 0/1:25,5:37 C  | A |
|       |       |   | 0.2   | 0.03, | 0.142 | 0.90 | 5.5 |      |       | SOM GT:/0:82 0/1:128,7:3 G  | T |
|       | ##    | 0 | 0.0   | 0.035 | 0.492 | 0.97 | 3.9 | 4.11 |       | SOM GT:/0:40 0/1:41,6:37 C  | T |
|       |       |   |       |       |       |      |     |      |       | SOM GT:/0:80 0/1:122,14 A   | G |
|       |       |   |       |       |       |      | 3.4 | 2.72 |       | SOM GT:/0:62 0/1:97,16:3 T  | C |
|       |       |   |       |       |       |      | 3.4 |      |       | SOM GT:/0:11 0/1:13,4:37 A  | C |
| 4E-04 | ##    | 0 |       |       |       |      | 3.2 |      |       | SOM GT:/0:32 0/1:57,7:37 C  | T |

|       |    |   |     |       |       |       |       |      |      |                            |     |                             |   |
|-------|----|---|-----|-------|-------|-------|-------|------|------|----------------------------|-----|-----------------------------|---|
|       | ## | 0 | 0   | .     | .     | .     | .     | .    | .    | SOM GT:/0:58 0/1:71,15:3 C | T   |                             |   |
| 2E-04 |    | 0 | 0   | .     | .     | .     | .     | .    | .    | SOM GT:/0:65 0/1:87,15:3 G | A   |                             |   |
|       |    | 0 | 0   | 0.5   | 0.0,B | 0.002 | 1,N   | .    | .    | SOM GT:/0:15 0/1:265,64 C  | T   |                             |   |
|       |    |   |     | .     | .     | .     | .     | .    | .    | SOM GT:/0:8,(0/1:15,4:37 C | T   |                             |   |
|       |    |   |     | 0.1   | 0.01, | 0.019 | 0.98  | .    | .    | SOM GT:/0:26 0/1:29,12:3 T | C   |                             |   |
|       |    |   |     | .     | .     | .     | .     | .    | 0    | SOM GT:/0:61 0/1:89,16:3 C | T   |                             |   |
|       |    |   |     | .     | .     | .     | .     | .    | .    | SOM GT:/0:15 0/1:27,13:3 A | G   |                             |   |
| 1E-03 | 0  | 0 | 0   | 0.3   | 0.31  | 10.92 | 10.99 | 5.4  | 3.35 | SOM GT:/0:74 0/1:123,23 G  | A   |                             |   |
|       | ## | 0 | .   | 1.0,D | 1.0,D | 1,D   | 5.6   | 5.52 | .    | SOM GT:/0:68 0/1:96,16:3 G | A   |                             |   |
|       | 0  | 0 | 0   | .     | .     | .     | .     | .    | .    | SOM GT:/0:10 0/1:184,27 G  | A   |                             |   |
|       |    |   |     | .     | .     | .     | .     | .    | .    | SOM GT:/0:89 0/1:126,20 C  | T   |                             |   |
|       |    |   |     | .     | .     | .     | .     | 1.68 | .    | SOM GT:/0:64 0/1:118,21 C  | T   |                             |   |
|       | ## | 0 | .   | .     | .     | .     | .     | 2.87 | .    | SOM GT:/0:14 0/1:8,3:37 A  | G   |                             |   |
|       |    |   |     | .     | .     | .     | 1,A   | 4.1  | 19.1 | SOM GT:/0:48 0/1:75,8:37 G | T   |                             |   |
|       |    |   |     | .     | .     | .     | .     | 3.5  | .    | SOM GT:/0:90 0/1:117,21 C  | T   |                             |   |
|       | ## | 0 | .   | .     | .     | .     | .     | .    | .    | SOM GT:/0:74 0/1:139,29 C  | T   |                             |   |
|       | 0  | 0 | .   | .     | .     | .     | .     | .    | .    | SOM GT:/0:19 0/1:150,41 G  | A   |                             |   |
|       |    |   |     | .     | .     | .     | .     | 3.2  | .    | SOM GT:/0:33 0/1:59,8:37 G | A   |                             |   |
|       |    |   |     | .     | .     | .     | .     | .    | .    | SOM GT:/0:32 0/1:34,9:37 T | C   |                             |   |
|       |    |   |     | .     | .     | .     | .     | .    | .    | SOM GT:/0:68 0/1:126,29 C  | T   |                             |   |
| 0.002 |    |   |     | .     | .     | .     | .     | .    | .    | SOM GT:/0:31 0/1:46,10:3 G | A   |                             |   |
|       |    |   |     | .     | .     | .     | .     | .    | .    | DB;S GT:/0:67 0/1:102,19 G | A   |                             |   |
|       |    |   |     | .     | .     | .     | .     | .    | .    | SOM GT:/0:84 0/1:148,36 A  | G   |                             |   |
|       |    |   |     | .     | .     | .     | .     | .    | .    | SOM GT:/0:19 0/1:32,6:35 G | A   |                             |   |
|       |    |   |     | .     | .     | .     | .     | .    | .    | SOM GT:/0:16 0/1:244,43 C  | A   |                             |   |
| 0.875 | 1  | 0 | .   | .     | .     | .     | .     | 2.3  | 1.54 | 0.1                        | 0.2 | DB;S GT:/0:58 0/1:127,6:3 T | C |
|       | ## | 0 | .   | .     | .     | .     | .     | .    | .    | .                          | .   | SOM GT:/0:50 0/1:91,16:3 G  | A |
|       |    |   |     | .     | .     | .     | .     | .    | .    | .                          | .   | SOM GT:/0:16 0/1:36,6:37 G  | A |
|       |    |   |     | .     | .     | .     | .     | .    | .    | .                          | .   | SOM GT:/0:16 0/1:31,7:37 C  | T |
|       |    |   |     | .     | .     | .     | .     | .    | .    | 0                          | .   | SOM GT:/0:17 0/1:17,10:1A   | T |
|       |    |   |     | .     | .     | .     | 1,N   | .    | .    | .                          | .   | SOM GT:/0:66 0/1:82,14:3 G  | T |
|       |    |   |     | .     | .     | .     | .     | .    | .    | .                          | .   | SOM GT:/0:86 0/1:124,18 C   | T |
|       |    |   |     | .     | .     | .     | .     | .    | .    | .                          | .   | SOM GT:/0:26 0/1:33,7:37 C  | T |
|       |    |   |     | .     | .     | .     | .     | .    | .    | 0                          | .   | SOM GT:/0:59 0/1:90,18:3 C  | T |
|       |    |   |     | .     | .     | .     | .     | .    | .    | .                          | .   | SOM GT:/0:69 0/1:118,21 A   | G |
|       |    |   |     | 0.0   | 0.116 | 0.22, | 0.94  | 2.9  | 2.39 | .                          | .   | SOM GT:/0:96 0/1:159,15 C   | T |
|       |    |   |     | 0.0   | 0.917 | 0.99, | 1.00  | 4.9  | 5.48 | .                          | .   | SOM GT:/0:48 0/1:87,16:3 C  | T |
|       |    |   |     | .     | .     | .     | .     | .    | .    | 0                          | 0   | SOM GT:/0:12 0/1:15,8:35 A  | G |
| 2E-04 | ## | 0 | 1.0 | 0.0,B | 0.0,B | 1,N   | .     | .    | .    | SOM GT:/0:67 0/1:91,12:3 C | T   |                             |   |
|       |    |   |     | .     | .     | .     | .     | .    | .    | .                          | .   | SOM GT:/0:53 0/1:86,15:3 G  | T |
|       |    |   |     | .     | .     | .     | .     | 2.5  | 2.71 | .                          | .   | SOM GT:/0:14 0/1:15,5:37 A  | G |
|       |    |   |     | .     | .     | .     | .     | .    | .    | .                          | .   | SOM GT:/0:16 0/1:36,3:37 G  | T |
|       |    |   |     | .     | .     | .     | .     | .    | .    | .                          | .   | SOM GT:/0:58 0/1:60,9:35 G  | T |
|       |    |   |     | 0.5   | 0.503 | 0.627 | 1.00  | 4.1  | 2.37 | .                          | .   | SOM GT:/0:63 0/1:96,17:3 G  | A |
|       | ## | 0 | 0.5 | 0.013 | 0.248 | 1,N   | .     | .    | .    | SOM GT:/0:99 0/1:142,30 C  | T   |                             |   |
|       |    |   |     | .     | .     | .     | .     | .    | .    | .                          | .   | SOM GT:/0:16 0/1:25,7:37 G  | T |
|       |    |   |     | .     | .     | .     | .     | .    | .    | .                          | .   | SOM GT:/0:19 0/1:29,6:37 C  | A |
|       |    |   |     | .     | .     | .     | .     | .    | .    | 0.1                        | 0.2 | SOM GT:/0:42 0/1:86,6:37 T  | G |
|       |    |   |     | .     | .     | .     | .     | .    | .    | 0                          | 0   | SOM GT:/0:12 0/1:27,3:37 T  | C |
|       |    |   |     | .     | .     | .     | .     | .    | .    | .                          | .   | SOM GT:/0:36 0/1:55,4:37 A  | G |
|       | ## | 0 | .   | 0.824 | 0.977 | 1.00  | 4.1   | 1.52 | .    | SOM GT:/0:44 0/1:70,15:3 C | T   |                             |   |
|       |    |   |     | .     | .     | .     | .     | .    | .    | .                          | .   | SOM GT:/0:26 0/1:43,5:37 G  | T |
|       | ## | 0 | 0.0 | 0.999 | 1.0,D | 1.00  | 2.6   | 4.46 | .    | SOM GT:/0:62 0/1:100,14 G  | A   |                             |   |
|       |    |   |     | .     | .     | .     | .     | .    | .    | .                          | .   | SOM GT:/0:37 0/1:65,9:37 C  | T |

|       |    |    |       |       |       |       |           |                                    |                            |   |
|-------|----|----|-------|-------|-------|-------|-----------|------------------------------------|----------------------------|---|
| .     | .  | .  | .     | .     | .     | .     | .         | SOM GT:/0:20 0/1:365,74 C          | T                          |   |
| .     | .  | .  | 0.0   | 0.926 | 0.999 | 1,D   | 5.1 3.24. | SOM GT:/0:13 0/1:208,37 G          | A                          |   |
| 8E-04 | ## | ## | 0.    | .     | .     | .     | .         | 0 SOM GT:/0:59 0/1:96,25:3 C       | T                          |   |
| 2E-04 | 0  | 0  | 0.    | .     | .     | .     | .         | SOM GT:/0:15 0/1:293,46 C          | T                          |   |
| .     | ## | 0. | .     | .     | .     | .     | .         | SOM GT:/0:13 0/1:195,45 C          | T                          |   |
| .     | ## | 0. | .     | .     | .     | .     | .         | SOM GT:/0:57 0/1:70,18:3 G         | A                          |   |
| .     | .  | .  | .     | .     | .     | .     | .         | SOM GT:/0:64 0/1:114,22 A          | G                          |   |
| .     | .  | .  | .     | .     | .     | .     | 1.44.     | SOM GT:/0:57 0/1:93,4:37 G         | T                          |   |
| .     | .  | .  | .     | .     | .     | .     | .         | SOM GT:/0:49 0/1:128,20 G          | A                          |   |
| 6E-04 | .  | .  | .     | .     | .     | .     | .         | 0 0 SOM GT:/0:14 0/1:37,7:35 G     | A                          |   |
| .     | .  | .  | .     | .     | .     | .     | .         | SOM GT:/0:39 0/1:41,13:3 G         | T                          |   |
| .     | .  | .  | .     | .     | .     | .     | .         | SOM GT:/0:10 0/1:17,3:37 C         | T                          |   |
| .     | .  | .  | .     | .     | .     | .     | .         | SOM GT:/0:22 0/1:25,9:34 C         | T                          |   |
| .     | .  | .  | .     | .     | .     | .     | .         | SOM GT:/0:41 0/1:78,18:3 A         | G                          |   |
| .     | .  | .  | .     | .     | .     | .     | .         | SOM GT:/0:87 0/1:150,21 G          | A                          |   |
| .     | .  | .  | .     | .     | .     | .     | 2.1.      | SOM GT:/0:66 0/1:106,18 G          | T                          |   |
| .     | .  | .  | .     | .     | .     | .     | .         | SOM GT:/0:65 0/1:98,14:3 C         | A                          |   |
| .     | ## | 0. | .     | .     | .     | .     | .         | 0 SOM GT:/0:62 0/1:98,24:3 G       | A                          |   |
| .     | .  | .  | .     | .     | .     | .     | 2.8.      | SOM GT:/0:62 0/1:64,14:3 T         | G                          |   |
| .     | .  | .  | .     | .     | .     | .     | .         | SOM GT:/0:35 0/1:49,6:37 C         | T                          |   |
| .     | .  | .  | .     | .     | .     | .     | .         | SOM GT:/0:19 0/1:37,8:35 G         | T                          |   |
| .     | ## | 0  | 0.1   | 0.925 | 0.997 | 1,D   | 4.5 4.18. | SOM GT:/0:11 0/1:177,31 C          | T                          |   |
| .     | .  | .  | .     | .     | .     | .     | 3.18.     | SOM GT:/0:80 0/1:108,22 C          | T                          |   |
| .     | .  | .  | .     | .     | .     | .     | .         | SOM GT:/0:59 0/1:112,23 C          | T                          |   |
| .     | .  | .  | .     | .     | .     | .     | .         | SOM GT:/0:83 0/1:119,22 G          | A                          |   |
| .     | .  | .  | .     | .     | .     | .     | .         | SOM GT:/0:23 0/1:41,9:35 G         | A                          |   |
| 0.402 | .  | .  | .     | .     | .     | .     | .         | 0.2 0.3 SOM GT:/0:9,(0/1:7,13:37 A | G                          |   |
| .     | 0  | 0. | .     | .     | .     | .     | 3.4.      | SOM GT:/0:46 0/1:89,10:3 C         | T                          |   |
| .     | .  | .  | .     | .     | .     | .     | .         | SOM GT:/0:20 0/1:34,5:37 A         | G                          |   |
| .     | ## | ## | 0     | 0.0   | 0.062 | 0.473 | 1,N       | 2.27.                              | SOM GT:/0:55 0/1:94,14:3 G | A |
| .     | .  | .  | .     | .     | .     | .     | .         | .                                  | SOM GT:/0:14 0/1:217,33 G  | A |
| .     | .  | .  | .     | .     | .     | .     | 3.7.      | SOM GT:/0:21 0/1:29,7:35 G         | T                          |   |
| .     | ## | 0  | 0.0   | 0.996 | 1.0,D | 1.00  | 5.3 5.31. | SOM GT:/0:41 0/1:85,13:3 C         | T                          |   |
| .     | .  | .  | .     | .     | .     | .     | 1.41.     | SOM GT:/0:50 0/1:69,16:3 C         | A                          |   |
| .     | .  | .  | 0.098 | 0.51, | l.    | .     | 3.5 2.51. | SOM GT:/0:83 0/1:130,27 G          | A                          |   |
| .     | .  | .  | .     | .     | .     | .     | .         | SOM GT:/0:63 0/1:139,17 C          | T                          |   |
| .     | .  | .  | .     | .     | .     | .     | .         | SOM GT:/0:16 0/1:25,7:35 G         | T                          |   |
| .     | .  | .  | .     | .     | .     | .     | .         | 0 DB;S GT:/0:31 0/1:39,5:25 A      | T                          |   |
| .     | .  | .  | .     | .     | .     | .     | 5.5 3.34. | SOM GT:/0:10 0/1:19,4:37 C         | T                          |   |
| .     | .  | .  | .     | .     | .     | .     | .         | SOM GT:/0:8,(0/1:9,4:37: G         | A                          |   |
| 1E-03 | .  | .  | .     | .     | .     | .     | .         | SOM GT:/0:26 0/1:39,7:37 A         | G                          |   |
| .     | .  | .  | .     | .     | .     | .     | .         | SOM GT:/0:84 0/1:124,11 G          | T                          |   |
| .     | ## | 0. | .     | .     | .     | .     | .         | SOM GT:/0:10 0/1:224,35 C          | T                          |   |
| .     | .  | .  | .     | .     | .     | .     | 2.8.      | SOM GT:/0:21 0/1:241,46 C          | A                          |   |
| .     | .  | .  | .     | .     | .     | .     | .         | SOM GT:/0:50 0/1:67,12:3 C         | T                          |   |
| .     | .  | .  | 0.0   | 0.997 | 1.0,D | 0.97  | 4.8 2.38. | SOM GT:/0:38 0/1:41,11:3 T         | C                          |   |
| .     | .  | .  | .     | .     | .     | .     | .         | SOM GT:/0:29 0/1:27,9:37 C         | T                          |   |
| .     | .  | .  | .     | .     | .     | .     | .         | SOM GT:/0:41 0/1:68,6:37 C         | T                          |   |
| 2E-04 | ## | 0  | 0.0   | 1.0,D | 1.0,D | 1,D   | 3.9 5.02. | SOM GT:/0:11 0/1:170,26 C          | T                          |   |
| .     | .  | .  | .     | .     | .     | .     | 3.2 1.45. | SOM GT:/0:41 0/1:76,17:3 G         | C                          |   |
| .     | ## | 0. | .     | .     | .     | .     | .         | SOM GT:/0:41 0/1:66,18:3 G         | A                          |   |
| .     | .  | .  | .     | .     | .     | .     | 4.7.      | SOM GT:/0:57 0/1:74,15:3 C         | T                          |   |
| .     | .  | .  | .     | .     | .     | .     | .         | SOM GT:/0:63 0/1:86,6:37 G         | T                          |   |
| .     | .  | .  | .     | .     | .     | .     | .         | SOM GT:/0:36 0/1:69,10:3 G         | T                          |   |

|       |    |       |       |                  |          |     |  |  |                            |   |
|-------|----|-------|-------|------------------|----------|-----|--|--|----------------------------|---|
|       |    |       |       |                  |          |     |  |  | SOM GT:/0:55 0/1:97,10:3 G | C |
|       | ## | ##    | 0 0.0 | 0.956 1.0,D 1.00 | 3.4 4.53 |     |  |  | SOM GT:/0:13 0/1:215,37 C  | T |
|       |    |       |       |                  |          |     |  |  | SOM GT:/0:34 0/1:62,9:37 A | G |
|       |    |       |       |                  | 2.6 1.73 |     |  |  | SOM GT:/0:31 0/1:54,5:34 C | A |
|       | 0  | 0     |       |                  |          |     |  |  | SOM GT:/0:43 0/1:58,16:3 G | A |
|       |    |       |       |                  |          |     |  |  | SOM GT:/0:8,(0/1:15,4:37 C | A |
|       | 0  | 0     | 0.393 | 0.981 0.98       | 5.5 2.78 | 0 0 |  |  | SOM GT:/0:70 0/1:114,22 C  | T |
|       |    |       |       | 0.998 1.0,D 1,D  | 4.6 2.18 |     |  |  | SOM GT:/0:83 0/1:128,24 G  | A |
|       |    |       | 0.0   | 0.996 1.0,D 1.00 | 4.1 3.94 |     |  |  | SOM GT:/0:24 0/1:32,10:3 G | A |
| 2E-04 | ## | 0 0.0 | 0.966 | 1.0,D 1,N        | 1.46     | 0   |  |  | SOM GT:/0:65 0/1:107,15 G  | A |
|       |    |       |       |                  |          |     |  |  | SOM GT:/0:62 0/1:106,23 G  | A |
|       | ## | ##    | 0     |                  |          |     |  |  | SOM GT:/0:41 0/1:80,6:37 C | T |
|       |    |       |       |                  |          |     |  |  | SOM GT:/0:20 0/1:31,3:33 G | A |
|       |    |       |       |                  |          |     |  |  | SOM GT:/0:32 0/1:35,6:37 G | A |
|       |    |       | 0.0   | 0.997 1.0,D 1,D  | 5.3 5.05 |     |  |  | SOM GT:/0:80 0/1:126,14 G  | A |
|       |    |       |       |                  |          |     |  |  | SOM GT:/0:22 0/1:21,5:37 C | A |
|       | ## |       |       |                  |          | 0 0 |  |  | SOM GT:/0:28 0/1:35,8:37 C | T |
|       |    |       |       |                  |          |     |  |  | SOM GT:/0:24 0/1:55,12:3 G | A |
|       |    |       |       |                  |          |     |  |  | SOM GT:/0:66 0/1:123,17 C  | T |
|       |    |       |       |                  |          |     |  |  | SOM GT:/0:26 0/1:54,20:3 C | A |
|       |    |       |       |                  | 1,D 3.8  |     |  |  | SOM GT:/0:18 0/1:38,6:37 T | C |
|       |    |       | 0.1   | 0.824 0.994 0.96 | 4.5 2.47 |     |  |  | SOM GT:/0:10 0/1:176,38 G  | A |
|       | ## | 0 0.0 | 0.923 | 1.0,D 1.00       | 3.3 3.15 |     |  |  | SOM GT:/0:12 0/1:188,34 G  | A |
|       |    |       |       |                  | 1.54     |     |  |  | SOM GT:/0:89 0/1:160,23 C  | T |
|       | 0  | 0     | 0     |                  | 2.5      | 0 0 |  |  | SOM GT:/0:47 0/1:89,18:3 G | A |
|       |    |       |       |                  | 2.6      |     |  |  | SOM GT:/0:10 0/1:173,25 G  | A |
|       |    |       | 0.3   | 0.085 0.716 0.99 | 3.1      |     |  |  | SOM GT:/0:15 0/1:35,5:34 G | A |
|       |    |       |       |                  | 2.2      |     |  |  | SOM GT:/0:45 0/1:70,16:3 A | G |
|       |    |       |       |                  | 2.3      |     |  |  | SOM GT:/0:41 0/1:50,8:37 A | G |
|       |    |       |       |                  |          | 0   |  |  | SOM GT:/0:27 0/1:53,12:3 G | A |
|       |    |       | 0.3   | 0.038 0.131 0.64 | 4.1 2.86 |     |  |  | SOM GT:/0:17 0/1:260,57 A  | T |
|       |    |       |       |                  |          |     |  |  | SOM GT:/0:20 0/1:40,3:37 C | A |
|       |    |       |       |                  |          |     |  |  | SOM GT:/0:11 0/1:187,36 G  | A |
|       |    |       | 0.0   | 0.837 0.983 1,D  | 5.9 3.34 |     |  |  | SOM GT:/0:22 0/1:36,7:37 G | T |
| 2E-04 |    |       |       |                  |          |     |  |  | SOM GT:/0:39 0/1:48,10:3 C | T |
|       |    |       |       |                  |          |     |  |  | SOM GT:/0:27 0/1:52,13:3 G | T |
| 2E-04 | ## | 0 0.0 | 0.042 | 0.313 0.99       | 4.8 1.42 |     |  |  | SOM GT:/0:81 0/1:129,30 C  | T |
|       | ## | 0     |       |                  | 4        |     |  |  | SOM GT:/0:35 0/1:39,8:33 C | T |
|       |    |       |       |                  |          |     |  |  | SOM GT:/0:49 0/1:75,19:3 A | G |
|       |    |       | 0.0   | 0.999 1.0,D 1,D  | 5.9 3.90 |     |  |  | SOM GT:/0:36 0/1:68,7:37 A | G |
|       | ## | 0     |       |                  |          | 0   |  |  | SOM GT:/0:34 0/1:41,8:37 G | A |
|       |    |       |       |                  | 3.1      |     |  |  | SOM GT:/0:28 0/1:33,6:37 A | G |
|       | ## | 0 0.0 | 0.77, | 0.999 1.00       | 4.8 4.35 |     |  |  | SOM GT:/0:85 0/1:143,25 G  | A |
|       |    |       |       |                  |          |     |  |  | SOM GT:/0:18 0/1:50,10:3 C | T |
|       |    |       |       |                  |          |     |  |  | SOM GT:/0:14 0/1:22,3:37 G | A |
|       |    |       | 0.0   | 0.994 0.999 0.99 | 3.46     |     |  |  | SOM GT:/0:28 0/1:29,5:37 G | T |
| 4E-04 | ## | 0 0   |       | 1,D              |          |     |  |  | SOM GT:/0:41 0/1:59,17:3 C | T |
|       |    |       | 0.0   | 0.443 0.529 1,N  | 3.8 2.23 |     |  |  | SOM GT:/0:60 0/1:66,8:37 T | C |
|       |    |       |       |                  | 1.56     |     |  |  | SOM GT:/0:25 0/1:40,6:37 A | G |
|       |    |       | 0.0   | 0.8,P 0.993 1,N  |          |     |  |  | SOM GT:/0:50 0/1:68,15:3 C | A |
|       |    |       |       |                  |          |     |  |  | SOM GT:/0:42 0/1:49,13:3 G | T |
|       |    |       |       |                  | 1.76     |     |  |  | SOM GT:/0:56 0/1:78,17:3 C | T |
|       |    |       |       |                  | 2.7 3.73 |     |  |  | SOM GT:/0:17 0/1:39,7:33 C | T |
|       | ## | ##    | 0     |                  |          |     |  |  | SOM GT:/0:30 0/1:59,11:3 C | T |

|       |    |    |    |       |       |       |       |      |      |      |      |      |            |             |             |   |   |
|-------|----|----|----|-------|-------|-------|-------|------|------|------|------|------|------------|-------------|-------------|---|---|
|       |    | ## | 0  | 0.0,B | 0.0,B | 1,N   |       |      |      | SOM  | GT:/ | 0:90 | 0/1:123,22 | G           | A           |   |   |
|       |    |    |    | 0.3   | 0.22, | 0.83  | 0.86  | 2.8  |      |      | SOM  | GT:/ | 0:16       | 0/1:284,54  | G           | A |   |
| 2E-04 | ## | ## | 0  |       |       |       |       |      |      | 0    | SOM  | GT:/ | 0:62       | 0/1:111,19  | C           | T |   |
|       |    |    |    | 0.0   | 0.997 | 1.0,D | 0.99  | 2.19 |      |      | SOM  | GT:/ | 0:78       | 0/1:157,33  | G           | T |   |
|       |    |    |    |       |       |       |       |      |      |      | SOM  | GT:/ | 0:12       | 0/1:192,38  | C           | T |   |
|       |    |    |    |       |       |       |       |      |      |      | SOM  | GT:/ | 0:13       | 0/1:10,3:37 | C           | T |   |
| 2E-04 | 0  | 0  | 0  | 0.0   | 0.24  | 0.54  | 1,D   | 3.5  | 2.62 |      | DB;  | GT:/ | 0:53       | 0/1:121,25  | G           | A |   |
| 4E-04 | 0  | ## | 0  |       |       |       |       |      |      |      | SOM  | GT:/ | 0:46       | 0/1:61,19:3 | C           | T |   |
|       |    |    |    |       |       |       |       |      |      |      | SOM  | GT:/ | 0:22       | 0/1:33,10:3 | C           | T |   |
|       |    | 0  | 0  |       |       |       |       |      |      | 0    | SOM  | GT:/ | 0:14       | 0/1:23,4:37 | G           | A |   |
|       |    |    |    | 0.0   | 0.12, | 0.87  | 0.57  |      |      |      | SOM  | GT:/ | 0:45       | 0/1:87,17:3 | G           | A |   |
|       |    |    |    |       |       |       |       | 1.24 |      |      | SOM  | GT:/ | 0:56       | 0/1:98,29:3 | C           | A |   |
|       |    | ## | ## | 0     | 0.1   | 0.92  | 1.0,D | 1,D  | 2.1  | 3.16 |      | SOM  | GT:/       | 0:11        | 0/1:173,40  | C | T |
|       |    |    |    |       |       |       |       | 2.19 |      |      |      | SOM  | GT:/       | 0:11        | 0/1:11,4:37 | G | A |
|       |    |    |    |       |       |       |       |      |      |      |      | SOM  | GT:/       | 0:18        | 0/1:37,8:37 | G | A |
|       |    |    |    |       |       |       |       |      |      | 0    |      | SOM  | GT:/       | 0:16        | 0/1:252,47  | C | T |
| 4E-04 | ## | ## | 0  |       |       |       |       | 1.68 |      |      |      | SOM  | GT:/       | 0:19        | 0/1:281,80  | G | A |
|       |    | 0  | 0  |       |       |       |       |      |      |      |      | SOM  | GT:/       | 0:11        | 0/1:211,34  | G | A |
|       |    |    |    | 0.5   | 0.12  | 0.19  | 0.99  | 4.7  | 1.33 |      |      | SOM  | GT:/       | 0:11        | 0/1:176,28  | G | T |
|       |    |    |    |       |       |       |       |      |      |      |      | SOM  | GT:/       | 0:33        | 0/1:72,11:3 | C | A |
|       |    | ## | ## | 0     |       |       |       | 1.31 |      |      |      | SOM  | GT:/       | 0:14        | 0/1:256,45  | C | T |
|       |    |    |    |       |       |       |       |      |      |      |      | SOM  | GT:/       | 0:9,        | 0/1:26,5:37 | C | T |
|       |    |    |    |       |       |       |       |      |      |      |      | SOM  | GT:/       | 0:25        | 0/1:23,9:37 | G | A |
|       |    |    |    |       |       |       |       |      |      |      |      | SOM  | GT:/       | 0:27        | 0/1:43,9:3  | C | T |
|       |    | ## | 0  | 0.0   | 0.387 | 0.81  | 1,N   | 2.00 |      |      |      | SOM  | GT:/       | 0:82        | 0/1:130,23  | G | A |
|       |    |    |    |       |       |       | 1,D   | 3.7  | 6.30 |      |      | SOM  | GT:/       | 0:66        | 0/1:99,20:3 | G | A |
| 6E-04 | 0  | 0  | 0  | 0.0   | 0.802 | 0.99  | 1,N   | 4.56 |      |      |      | SOM  | GT:/       | 0:53        | 0/1:112,12  | G | A |
|       |    |    |    |       |       |       |       |      |      |      |      | SOM  | GT:/       | 0:29        | 0/1:64,9:3  | C | A |
|       |    |    |    | 0.0   | 0.33  | 0.41  | 1,D   | 4    | 4.18 |      |      | SOM  | GT:/       | 0:10        | 0/1:174,46  | T | C |
|       |    |    |    |       |       |       |       | 1.51 |      |      |      | SOM  | GT:/       | 0:63        | 0/1:102,12  | C | T |
|       |    |    |    |       |       |       |       |      |      | 0    |      | SOM  | GT:/       | 0:94        | 0/1:169,30  | G | A |
|       |    | ## | 0  |       |       |       |       | 1.52 |      |      |      | SOM  | GT:/       | 0:97        | 0/1:154,30  | G | A |
|       |    |    |    |       |       |       |       |      |      |      |      | SOM  | GT:/       | 0:31        | 0/1:53,5:37 | T | C |
| 6E-04 | ## | ## | 0  | 0.0   | 0.14, | 0.53  | 1.00  | 5.3  | 3.72 |      |      | SOM  | GT:/       | 0:92        | 0/1:161,32  | C | T |
|       |    | ## | 0  | 0     |       |       |       |      |      | 0    |      | SOM  | GT:/       | 0:10        | 0/1:168,29  | C | T |
|       |    | ## | ## | 0     | 0.0   | 0.072 | 0.14  | 1,D  | 4.1  | 2.79 |      | SOM  | GT:/       | 0:19        | 0/1:314,56  | G | A |
|       |    | ## | 0  |       |       |       |       |      |      |      |      | SOM  | GT:/       | 0:76        | 0/1:107,24  | C | T |
| 2E-04 | ## | ## | 0  | 0.0   | 0.997 | 1.0,D | 1.00  | 5.4  | 5.41 | 0    |      | SOM  | GT:/       | 0:39        | 0/1:90,15:3 | G | A |
|       |    |    |    |       |       |       |       | 1.28 |      |      |      | SOM  | GT:/       | 0:10        | 0/1:22,5:37 | G | T |
|       |    |    |    |       |       |       |       |      |      |      |      | SOM  | GT:/       | 0:10        | 0/1:143,22  | C | A |
|       |    | ## | 0  |       |       |       |       |      |      |      |      | SOM  | GT:/       | 0:85        | 0/1:137,25  | C | T |
| 0.015 | 0  | 0  | 0  | 0.5   | 0.013 | 0.08  | 1,N   |      |      | 0    | 0    | DB;  | GT:/       | 0:16        | 0/1:333,59  | C | T |
|       |    | ## | 0  |       |       |       |       |      |      |      |      | SOM  | GT:/       | 0:19        | 0/1:318,58  | C | T |
| 0.002 |    |    |    |       |       |       |       | 2.2  |      |      |      | SOM  | GT:/       | 0:16        | 0/1:15,3:37 | T | G |
|       |    |    |    | 0.1   | 0.003 | 0.00  | 1,N   |      |      | 0    |      | SOM  | GT:/       | 0:78        | 0/1:118,19  | C | T |
|       |    |    |    |       |       |       |       |      |      |      |      | SOM  | GT:/       | 0:8,        | 0/1:6,2:37  | C | T |
|       |    |    |    |       |       |       |       |      |      |      |      | SOM  | GT:/       | 0:11        | 0/1:12,3:37 | C | G |
| 6E-04 |    | 0  | 0  |       |       |       |       |      |      | 0    |      | SOM  | GT:/       | 0:12        | 0/1:108,29  | G | A |
|       |    | ## | 0  | 0.3   | 0.0,B | 0.0,B | 1,N   |      |      |      |      | SOM  | GT:/       | 0:11        | 0/1:166,37  | C | T |
|       |    |    |    |       |       |       |       |      |      |      |      | SOM  | GT:/       | 0:11        | 0/1:213,39  | C | T |
|       |    |    |    |       |       |       |       |      |      |      |      | SOM  | GT:/       | 0:11        | 0/1:21,6:37 | A | G |
|       |    |    |    | 0.1   | 0.59  | 0.95  | 1.00  | 4.3  | 2.96 | 0    |      | SOM  | GT:/       | 0:37        | 0/1:52,11:3 | G | A |
|       |    | ## | 0  | 0.0   | 0.95  | 1.0,D | 1.00  | 4.8  | 2.99 |      |      | SOM  | GT:/       | 0:12        | 0/1:196,40  | G | A |
|       |    |    |    | 0.0   | 0.72  | 0.99  | 0.67  | 2.8  | 3.44 |      |      | SOM  | GT:/       | 0:61        | 0/1:97,18:3 | C | T |



|       |    |    |     |            |       |           |      |      |                          |                          |                          |                      |   |   |
|-------|----|----|-----|------------|-------|-----------|------|------|--------------------------|--------------------------|--------------------------|----------------------|---|---|
|       |    |    | 1.0 | 0.1910.327 | 0.91  | 5.5       |      |      | SOM GT:/0:75 0/1:111,21  | G                        | A                        |                      |   |   |
|       |    |    |     |            |       |           |      |      | SOM GT:/0:31 0/1:68,4:37 | G                        | A                        |                      |   |   |
|       |    |    | 0.2 | 0.249      | 0.514 | 1.00      |      | 0    | SOM GT:/0:47 0/1:81,16:3 | G                        | T                        |                      |   |   |
|       |    |    |     |            |       |           |      |      | SOM GT:/0:10 0/1:18,3:37 | G                        | A                        |                      |   |   |
| 2E-04 | ## | 0  |     |            |       |           | 1.42 |      | SOM GT:/0:13 0/1:232,40  | G                        | A                        |                      |   |   |
|       | ## | 0  |     |            |       |           |      |      | SOM GT:/0:16 0/1:241,46  | G                        | A                        |                      |   |   |
|       |    |    |     |            |       |           |      |      | SOM GT:/0:9,(0/1:19,5:37 | A                        | G                        |                      |   |   |
|       |    |    | 0.0 | 0.978      | 0.993 | 1,D       | 4.4  | 4.77 | SOM GT:/0:70 0/1:115,16  | C                        | T                        |                      |   |   |
|       | ## | 0  |     |            |       |           |      |      | SOM GT:/0:25 0/1:50,21:3 | C                        | T                        |                      |   |   |
|       | ## | ## | 0   |            |       |           |      |      | SOM GT:/0:52 0/1:70,18:3 | G                        | A                        |                      |   |   |
|       | ## | ## | 0   | 0.0        | 0.998 | 1.0,D 1,D | 4.8  | 5.30 | SOM GT:/0:49 0/1:86,14:3 | C                        | T                        |                      |   |   |
|       |    |    |     |            |       |           |      |      | SOM GT:/0:11 0/1:38,7:37 | A                        | G                        |                      |   |   |
| 8E-04 |    |    |     |            |       |           |      | 0    | 0                        | SOM GT:/0:31 0/1:45,7:37 | A                        | T                    |   |   |
|       |    |    |     |            |       |           |      |      | SOM GT:/0:39 0/1:59,6:35 | G                        | T                        |                      |   |   |
|       | 0  | ## | 0   | 0.2        | 0.007 | 0.012     | 1,N  | 1.25 | 0                        | SOM GT:/0:13 0/1:222,31  | G                        | A                    |   |   |
|       |    |    |     | 0.0        | 0.918 | 0.998     | 1.00 | 3    | 3.50                     | SOM GT:/0:55 0/1:87,21:3 | G                        | A                    |   |   |
|       |    |    |     | 0.0        | 0.889 | 0.99      | 1,D  | 4.5  | 4.51                     | SOM GT:/0:53 0/1:109,18  | A                        | C                    |   |   |
|       |    |    |     | 0.2        | 0.216 | 0.641     | 1,N  | 2.4  |                          | SOM GT:/0:11 0/1:162,25  | C                        | G                    |   |   |
|       |    |    |     |            |       |           |      |      | SOM GT:/0:34 0/1:637,41  | C                        | T                        |                      |   |   |
|       |    |    |     | 0.0        | 0.999 | 1.0,D     | 1.00 | 2.2  | 3.41                     | SOM GT:/0:94 0/1:173,35  | G                        | A                    |   |   |
|       |    |    |     |            |       |           |      |      | SOM GT:/0:38 0/1:49,10:3 | G                        | A                        |                      |   |   |
|       |    |    |     |            |       |           |      |      | SOM GT:/0:71 0/1:115,20  | C                        | T                        |                      |   |   |
| 4E-04 |    |    |     |            |       |           |      |      | DB;S                     | GT:/0:46 0/1:71,16:3     | G                        | A                    |   |   |
|       |    |    |     |            |       |           |      |      | SOM GT:/0:32 0/1:27,6:37 | T                        | C                        |                      |   |   |
|       |    |    |     | 0.0        | 0.908 | 1.0,D     | 1,N  | 1.71 |                          | SOM GT:/0:80 0/1:117,25  | G                        | A                    |   |   |
|       | ## | 0  |     |            |       |           |      |      | SOM GT:/0:59 0/1:106,16  | G                        | A                        |                      |   |   |
|       |    |    |     | 0.3        | 0.113 | 0.804     | 0.98 | 4.7  | 2.67                     | SOM GT:/0:90 0/1:170,35  | C                        | T                    |   |   |
|       |    |    |     |            |       |           |      |      | SOM GT:/0:28 0/1:46,7:37 | T                        | C                        |                      |   |   |
|       |    |    |     |            |       |           |      |      | SOM GT:/0:98 0/1:157,35  | G                        | T                        |                      |   |   |
|       |    |    |     | 0.0        | 0.997 | 1.0,D     | 0.99 | 4.4  | 4.50                     | SOM GT:/0:50 0/1:83,13:3 | C                        | T                    |   |   |
|       | ## | ## | 0   |            |       |           |      |      | 0                        | SOM GT:/0:24 0/1:70,12:3 | C                        | T                    |   |   |
| 2E-04 |    |    |     |            |       |           |      |      |                          | SOM GT:/0:56 0/1:72,12:3 | C                        | T                    |   |   |
|       |    |    |     |            |       |           |      |      |                          | SOM GT:/0:21 0/1:302,60  | C                        | A                    |   |   |
|       |    |    |     |            |       |           |      |      | 0                        | SOM GT:/0:17 0/1:271,23  | T                        | C                    |   |   |
|       |    |    |     |            |       |           |      |      |                          | SOM GT:/0:11 0/1:200,22  | T                        | C                    |   |   |
|       |    |    |     |            |       |           |      |      |                          | SOM GT:/0:34 0/1:50,4:37 | C                        | T                    |   |   |
|       | ## | 0  | 0.4 | 0.959      | 0.997 | 1,D       | 5.8  | 2.48 |                          | SOM GT:/0:72 0/1:99,16:3 | C                        | T                    |   |   |
|       | ## | ## | 0   | 0.0        | 0.011 | 0.022     | 1.00 | 2.1  | 2.96                     | SOM GT:/0:23 0/1:49,14:3 | C                        | T                    |   |   |
|       |    |    |     |            |       |           |      |      |                          | SOM GT:/0:84 0/1:159,23  | C                        | G                    |   |   |
|       |    |    |     |            |       |           |      |      |                          | SOM GT:/0:8,(0/1:13,3:37 | A                        | C                    |   |   |
|       | ## | 0  | 0.0 | 0.011      | 0.168 | 1,D       | 4.9  | 3.90 |                          | SOM GT:/0:58 0/1:87,16:3 | G                        | A                    |   |   |
|       |    |    |     |            |       |           |      |      |                          | SOM GT:/0:69 0/1:120,19  | G                        | A                    |   |   |
|       |    |    |     |            |       |           | 2.4  |      |                          | SOM GT:/0:20 0/1:32,8:37 | T                        | C                    |   |   |
| 2E-04 |    |    |     |            |       |           |      |      | 0                        | SOM GT:/0:12 0/1:20,3:37 | C                        | T                    |   |   |
|       |    |    |     |            |       |           |      |      |                          | SOM GT:/0:9,(0/1:25,3:37 | C                        | T                    |   |   |
|       |    |    |     |            |       |           |      |      | 0                        | 0                        | DB;S                     | GT:/0:19 0/1:43,4:37 | C | A |
|       |    |    |     |            |       |           |      |      | 0                        | SOM GT:/0:42 0/1:87,4:37 | C                        | G                    |   |   |
|       |    |    |     |            |       |           |      |      | 0                        | SOM GT:/0:35 0/1:86,5:37 | C                        | T                    |   |   |
|       |    |    |     |            |       |           |      |      |                          | SOM GT:/0:14 0/1:32,3:37 | G                        | A                    |   |   |
|       |    |    |     | 0.2        | 0.031 | 0.021     | 0.93 | 3.2  | 1.73                     | SOM GT:/0:32 0/1:69,11:3 | G                        | T                    |   |   |
| 6E-04 | 0  | 0  | 0   | 0.2        | 0.058 | 0.103     | 1,N  | 2.00 |                          | SOM GT:/0:62 0/1:94,22:3 | C                        | T                    |   |   |
|       |    |    |     |            |       |           | 2.2  |      |                          | SOM GT:/0:13 0/1:19,5:37 | C                        | T                    |   |   |
| 2E-04 | ## | 0  |     |            |       |           |      |      | 0                        | SOM GT:/0:10 0/1:187,29  | G                        | A                    |   |   |
| 0.004 |    |    |     |            |       |           |      |      | 0                        | 0                        | SOM GT:/0:45 0/1:55,5:34 | A                    | G |   |

|       |    |    |     |       |       |       |      |      |      |                           |                           |                            |   |
|-------|----|----|-----|-------|-------|-------|------|------|------|---------------------------|---------------------------|----------------------------|---|
|       |    |    |     |       |       |       |      |      |      | SOM GT:/0:19 0/1:34,7:3G  | A                         |                            |   |
|       |    |    |     |       |       |       |      |      |      | SOM GT:/0:21 0/1:47,5:2C  | A                         |                            |   |
| 0.009 |    |    |     |       |       |       |      |      |      | SOM GT:/0:38 0/1:76,11:3A | G                         |                            |   |
|       |    |    |     |       |       | 2.5   | 3.60 |      |      | SOM GT:/0:72 0/1:139,21 G | A                         |                            |   |
|       |    |    |     |       |       |       | 1.35 |      |      | SOM GT:/0:15 0/1:23,3:37T | C                         |                            |   |
|       | ## | 0  |     |       |       |       |      |      | 0    | SOM GT:/0:12 0/1:15,5:37G | A                         |                            |   |
|       | ## | 0  | 0.1 | 0.24E | 0.96E | 0.99  | 4.2  | 3.28 |      | SOM GT:/0:40 0/1:71,17:3G | A                         |                            |   |
|       |    |    |     |       |       |       | 2.4  |      |      | SOM GT:/0:62 0/1:73,25:3G | A                         |                            |   |
|       | ## | 0  |     | 0.794 | 0.98E | 1.00  | 4.8  | 3.90 |      | SOM GT:/0:13 0/1:251,41 G | A                         |                            |   |
|       |    |    |     |       |       |       |      |      |      | SOM GT:/0:44 0/1:78,10:3C | T                         |                            |   |
|       |    |    |     |       |       |       | 2.4  |      |      | SOM GT:/0:26 0/1:59,7:37G | A                         |                            |   |
|       |    |    | 0.0 | 0.07, | 0.50E | 1,N   | 3    | 2.64 |      | SOM GT:/0:14 0/1:244,52 C | T                         |                            |   |
|       |    |    | 0.4 | 0.042 | 0.00E | 0.55  | 3.6  | 2.75 |      | SOM GT:/0:65 0/1:152,27 C | T                         |                            |   |
|       |    |    |     |       |       |       | 2.41 |      |      | SOM GT:/0:9,(0/1:15,4:37C | A                         |                            |   |
|       |    |    | 0.0 | 0.237 | 0.74E | 1.00  | 3.5  | 2.25 |      | SOM GT:/0:42 0/1:87,19:3G | C                         |                            |   |
|       |    |    |     |       |       |       | 1,A  | 4.6  | 7.89 | SOM GT:/0:31 0/1:80,19:3G | T                         |                            |   |
|       |    |    | 0.2 | 0.831 | 0.99  | 10.98 | 4.8  | 2.51 |      | SOM GT:/0:69 0/1:139,5:3G | T                         |                            |   |
|       |    |    | 0.0 | 0.02, | 0.14E | 0.88  | 2.9  | 2.50 |      | SOM GT:/0:41 0/1:77,13:3C | T                         |                            |   |
|       |    |    | 0.0 | 0.99E | 1.0,D | 1,D   | 4.2  | 3.92 |      | SOM GT:/0:65 0/1:129,22 C | A                         |                            |   |
|       |    |    |     |       |       |       | 1,A  | 4.13 |      | SOM GT:/0:91 0/1:123,29 C | A                         |                            |   |
|       |    |    |     |       |       |       |      |      | 0    | 0                         | SOM GT:/0:73 0/1:149,9:3T | C                          |   |
|       |    |    |     |       |       |       |      |      |      |                           | SOM GT:/0:24 0/1:31,3:37C | T                          |   |
|       |    |    |     |       |       |       |      |      |      |                           | SOM GT:/0:19 0/1:382,65 G | A                          |   |
|       |    |    |     |       |       |       |      |      |      |                           | SOM GT:/0:41 0/1:61,9:37T | G                          |   |
|       |    |    |     | 0.004 | 0.012 | 1,N   | 2.49 |      |      | SOM GT:/0:59 0/1:89,13:3G | T                         |                            |   |
|       | ## | 0  |     | 0.015 | 0.31E | 1,N   | 1.91 | 0    |      | SOM GT:/0:10 0/1:171,32 C | T                         |                            |   |
|       |    |    |     |       |       |       |      |      |      |                           | SOM GT:/0:14 0/1:18,4:37C | T                          |   |
|       |    |    |     |       |       |       |      |      |      |                           | SOM GT:/0:59 0/1:73,12:3C | T                          |   |
| 2E-04 |    |    |     |       |       |       |      |      |      | SOM GT:/0:27 0/1:41,10:3C | T                         |                            |   |
|       |    |    |     |       |       |       | 2.03 |      |      | SOM GT:/0:10 0/1:198,47 C | T                         |                            |   |
|       |    |    | 0.0 | 0.99E | 1.0,D | 0.98  | 3.8  | 2.47 |      | SOM GT:/0:10 0/1:189,36 C | A                         |                            |   |
|       |    |    |     |       |       |       | 1.42 |      |      | SOM GT:/0:9,(0/1:24,5:37T | C                         |                            |   |
|       |    |    | 0.0 | 0.534 | 0.712 | 1,D   | 2.4  | 3.32 |      | SOM GT:/0:12 0/1:196,25 G | T                         |                            |   |
|       |    |    | 0.0 | 0.84, | 0.99E | 0.99  | 5.3  | 2.86 |      | SOM GT:/0:10 0/1:201,37 C | T                         |                            |   |
|       | ## | ## | 0   | 0.0   | 0.96E | 0.997 | 1,D  | 4.7  | 3.93 | 0                         | 0                         | SOM GT:/0:14 0/1:190,36 C  | T |
|       |    |    |     |       |       |       |      |      |      |                           |                           | SOM GT:/0:34 0/1:41,7:3E G | A |
|       |    |    |     |       |       |       |      |      |      |                           |                           | SOM GT:/0:27 0/1:25,5:37G  | A |
|       |    |    |     |       |       |       |      |      |      |                           |                           | SOM GT:/0:66 0/1:104,25 C  | T |
|       |    |    |     |       |       |       |      |      |      |                           |                           | SOM GT:/0:9,(0/1:22,3:37C  | G |
|       |    |    | 0.0 | 0.22E | 0.957 | 1,D   | 4.1  | 3.36 |      | SOM GT:/0:20 0/1:306,67 G | A                         |                            |   |
|       |    |    |     |       |       |       |      |      |      |                           |                           | SOM GT:/0:51 0/1:109,23 G  | A |
|       |    |    |     |       |       |       |      |      |      |                           |                           | SOM GT:/0:46 0/1:70,5:37G  | A |
|       |    |    |     |       |       |       | 4.4  | 2.17 |      |                           |                           | SOM GT:/0:47 0/1:57,10:3A  | G |
| 4E-04 |    |    |     |       |       |       |      |      |      |                           |                           | SOM GT:/0:17 0/1:29,12:3C  | T |
|       |    |    |     |       |       |       |      |      |      |                           |                           | SOM GT:/0:23 0/1:32,9:34C  | T |
|       |    |    |     |       |       |       | 2.5  | 1.43 |      |                           |                           | SOM GT:/0:64 0/1:129,21 G  | T |
|       |    |    |     |       |       |       |      |      |      |                           |                           | SOM GT:/0:63 0/1:103,15 C  | T |
|       | 0  | 0  | 0   | 0.0   | 0.974 | 1.0,D | 1.00 | 3.1  | 4.07 |                           |                           | SOM GT:/0:17 0/1:50,6:37G  | A |
| 6E-04 | 0  | 0  | 0   |       |       |       | 4.4  | 1.63 |      |                           |                           | SOM GT:/0:10 0/1:151,29 G  | A |
|       |    |    |     |       |       |       |      |      |      |                           |                           | SOM GT:/0:17 0/1:273,59 G  | A |
| 0.015 |    |    |     |       |       |       |      |      |      | 0                         | 0                         | DB;GT:/0:20 0/1:35,6:37T   | G |
|       | ## | ## | 0   |       |       |       |      |      |      |                           |                           | SOM GT:/0:40 0/1:77,13:3C  | T |
|       |    |    |     |       |       |       |      |      |      |                           |                           | SOM GT:/0:21 0/1:20,6:37G  | A |
|       | 0  | 0  | 0.1 | 0.004 | 0.001 | 0.97  | 1.31 |      |      |                           |                           | SOM GT:/0:66 0/1:97,20:3G  | A |

|       |    |    |    |           |           |         |         |        |      |                         |                         |                         |                        |   |   |
|-------|----|----|----|-----------|-----------|---------|---------|--------|------|-------------------------|-------------------------|-------------------------|------------------------|---|---|
|       |    |    |    |           | 1,D       | 2.8     | 1.87    |        |      | SOM GT:/0:96 0/1:161,28 | G                       | A                       |                        |   |   |
|       |    |    |    |           |           |         |         |        |      | SOM GT:/0:15 0/1:241,45 | A                       | G                       |                        |   |   |
|       |    |    |    |           | 0.0:1.0,D | 1.0,D   | 1,D     |        | 2.92 | SOM GT:/0:13 0/1:197,38 | T                       | C                       |                        |   |   |
|       |    |    |    |           |           |         |         |        |      | SOM GT:/0:49 0/1:59,13  | A                       | G                       |                        |   |   |
|       | 0  | 0  | 0  |           |           |         |         |        | 0    | 0                       | SOM GT:/0:66 0/1:107,5  | T                       | G                      |   |   |
|       |    |    |    |           |           |         |         |        |      |                         | SOM GT:/0:90 0/1:190,9  | 3                       | G                      |   |   |
|       |    |    |    |           | 0.3:0.57, | 1.0.782 |         |        | 4.8  | 3.58                    | SOM GT:/0:17 0/1:264,36 | T                       | G                      |   |   |
|       |    |    |    |           |           |         |         |        |      |                         | SOM GT:/0:11 0/1:25,7   | 3                       | T                      |   |   |
|       |    |    |    |           |           |         |         |        |      |                         | SOM GT:/0:22 0/1:42,5   | 3                       | G                      |   |   |
|       | 0  | ## | 0  |           |           |         |         |        |      |                         | SOM GT:/0:96 0/1:141,7  | 3                       | G                      |   |   |
|       |    |    |    |           |           |         |         |        | 2.9  | 1.43                    | SOM GT:/0:88 0/1:139,27 | C                       | A                      |   |   |
|       |    | ## |    |           |           |         |         |        | 1,N  | 2.84                    | SOM GT:/0:99 0/1:143,30 | G                       | A                      |   |   |
|       |    |    |    |           |           |         |         |        |      |                         | SOM GT:/0:10 0/1:15,4   | 3                       | G                      |   |   |
|       |    | ## | 0  | 0.1       | 0.078     | 0.864   | 1,N     |        | 2.24 | 0                       | SOM GT:/0:11 0/1:146,44 | C                       | T                      |   |   |
|       | ## | 0  | 0  | 0.0       | 0.37,     | 1.0.529 | 1,N     |        |      | 0                       | SOM GT:/0:47 0/1:83,13  | 3                       | G                      |   |   |
|       |    | ## | 0  |           |           |         |         |        |      | 0                       | SOM GT:/0:63 0/1:89,11  | 3                       | C                      |   |   |
|       |    |    |    |           |           |         |         |        | 1.27 |                         | SOM GT:/0:20 0/1:26,7   | 3                       | G                      |   |   |
|       |    |    |    |           |           |         |         |        |      |                         | SOM GT:/0:37 0/1:52,12  | 3                       | G                      |   |   |
|       | 0  | 0  | 0  |           |           |         |         |        |      |                         | SOM GT:/0:32 0/1:64,4   | 3                       | C                      |   |   |
|       |    |    |    |           |           |         |         |        |      |                         | SOM GT:/0:13 0/1:254,45 | C                       | T                      |   |   |
|       | ## | ## | 0  |           |           |         |         |        |      |                         | SOM GT:/0:89 0/1:162,25 | C                       | T                      |   |   |
|       |    |    |    |           | 0.2:0.122 | 0.555   | 1,N     |        |      |                         | SOM GT:/0:20 0/1:348,55 | C                       | T                      |   |   |
|       |    | ## | 0  |           |           |         |         |        | 3.8  | 3.57                    | 0                       | SOM GT:/0:17 0/1:31,4   | 3                      | T |   |
|       |    |    |    |           |           |         |         |        | 1.56 |                         | SOM GT:/0:85 0/1:139,22 | G                       | A                      |   |   |
|       |    |    |    |           |           |         |         |        |      | 0                       | SOM GT:/0:24 0/1:35,6   | 3                       | C                      |   |   |
|       |    |    |    |           |           |         |         |        |      |                         | SOM GT:/0:21 0/1:42,5   | 3                       | C                      |   |   |
|       |    | 0  | 0  |           |           |         |         |        | 1,A  | 3.4                     | 8.95                    | SOM GT:/0:37 0/1:50,8   | 3                      | G |   |
|       |    |    |    |           |           |         |         |        |      |                         | SOM GT:/0:12 0/1:16,6   | 3                       | C                      |   |   |
|       |    |    |    |           |           |         |         |        |      |                         | SOM GT:/0:42 0/1:56,17  | 3                       | G                      |   |   |
|       |    |    |    |           |           |         |         |        |      |                         | SOM GT:/0:14 0/1:35,9   | 3                       | T                      |   |   |
|       |    |    |    |           | 0.0       | 0.98,   | 1.0.99, | 1,D    | 5.6  | 4.31                    | SOM GT:/0:55 0/1:89,18  | 3                       | A                      |   |   |
|       |    |    |    |           |           |         |         |        |      |                         | SOM GT:/0:30 0/1:46,4   | 3                       | T                      |   |   |
| 2E-04 | 0  | ## | 0  | 0.0       | 0.583     | 0.928   | 1,N     |        | 1.82 | 0                       | SOM GT:/0:48 0/1:108,16 | G                       | A                      |   |   |
|       |    |    |    |           |           |         |         |        |      |                         | SOM GT:/0:10 0/1:15,4   | 3                       | T                      |   |   |
|       |    |    |    |           |           |         |         |        |      | 0                       | SOM GT:/0:9,0           | 1:27,4                  | 3                      | C |   |
|       |    |    |    |           |           |         |         |        |      | 0                       | SOM GT:/0:15 0/1:39,3   | 3                       | C                      |   |   |
|       |    |    |    |           |           |         |         |        |      | 0                       | SOM GT:/0:16 0/1:41,3   | 3                       | G                      |   |   |
| 2E-04 |    | ## | 0  | 0.3:0.023 | 0.142     | 1.00    |         |        | 5    | 2.85                    | 0                       | SOM GT:/0:55 0/1:113,11 | C                      | T |   |
|       |    |    |    |           |           |         |         |        |      |                         | SOM GT:/0:84 0/1:128,14 | C                       | A                      |   |   |
|       |    |    |    |           |           |         |         |        | 2.6  |                         | SOM GT:/0:14 0/1:24,5   | 3                       | T                      |   |   |
|       |    |    |    |           |           |         |         |        |      | 0                       | 0                       | SOM GT:/0:10 0/1:6,2    | 3                      | T |   |
| 0.022 | 0  | 0  | 0  |           |           |         |         |        |      | 0                       | 0                       | DB;GT:/0:40 0/1:86,6    | 3                      | A |   |
|       |    |    |    |           |           |         |         |        |      |                         |                         | SOM GT:/0:14 0/1:29,6   | 3                      | A |   |
|       |    | 0  | ## | 0         | 0.0       | 0.992   | 1.0,D   | 1,D    | 5    | 5.37                    | SOM GT:/0:52 0/1:100,16 | C                       | T                      |   |   |
| 0.001 |    |    |    |           |           |         |         |        |      | 0                       | SOM GT:/0:20 0/1:40,12  | 3                       | T                      |   |   |
|       |    |    |    |           |           |         |         |        | 1.86 |                         | SOM GT:/0:73 0/1:141,5  | 3                       | G                      |   |   |
|       |    |    |    |           |           |         |         |        |      |                         | SOM GT:/0:44 0/1:60,8   | 3                       | G                      |   |   |
|       |    |    |    |           |           |         |         |        | 2.54 | 0                       | 0                       | SOM GT:/0:9,0           | 1:25,3                 | 3 | G |
|       |    |    |    |           |           |         |         |        |      |                         | SOM GT:/0:15 0/1:29,7   | 3                       | T                      |   |   |
|       |    |    |    |           |           |         |         |        |      |                         | SOM GT:/0:31 0/1:27,6   | 3                       | C                      |   |   |
|       |    |    |    |           | 0.0       | 0.987   | 0.996   | 1.00   | 4.4  | 5.38                    | SOM GT:/0:11 0/1:184,35 | G                       | A                      |   |   |
| 2E-04 | ## | ## | 0  |           |           |         |         |        | 3.8  | 3.08                    | 0                       | 0                       | SOM GT:/0:53 0/1:73,10 | 3 | G |
|       |    |    |    |           | 0.6       | 0.012   | 0.02,   | 1.0.75 | 3.1  |                         |                         | SOM GT:/0:29 0/1:35,7   | 3                      | T |   |
|       |    |    |    |           | 0.0       | 0.999   | 1.0,D   | 1,D    | 4.5  | 2.75                    | SOM GT:/0:79 0/1:162,15 | C                       | T                      |   |   |

|       |   |    |   |           |       |      |      |         |                            |   |
|-------|---|----|---|-----------|-------|------|------|---------|----------------------------|---|
|       |   |    |   | 1,A       | 4.3   | 8.44 |      |         | SOM GT:/0:14 0/1:261,38 G  | A |
|       | 0 | ## | 0 |           |       |      |      |         | SOM GT:/0:78 0/1:129,24 G  | A |
|       |   |    |   |           | 2.5   |      |      |         | SOM GT:/0:21 0/1:26,5:37T  | C |
|       |   |    |   |           |       |      |      |         | SOM GT:/0:81 0/1:108,15 G  | T |
|       |   |    |   | 1,N       |       |      |      |         | SOM GT:/0:27 0/1:48,12:3 C | A |
|       |   |    |   |           |       |      |      |         | SOM GT:/0:29 0/1:43,8:37G  | T |
|       |   |    |   |           |       |      |      |         | SOM GT:/0:63 0/1:112,20 G  | T |
|       |   |    |   | 0.0:0.999 | 1.0,D | 1.00 | 5.6  | 4.89    | SOM GT:/0:61 0/1:94,18:3 C | T |
|       |   |    |   | 0.0:0.994 | 1.0,D | 1,D  | 5.2  | 4.06    | SOM GT:/0:96 0/1:158,25 G  | A |
|       |   |    |   |           |       |      |      |         | SOM GT:/0:40 0/1:66,11:3 C | T |
|       |   |    |   |           |       |      |      |         | SOM GT:/0:45 0/1:49,17:3 G | A |
|       |   |    |   |           |       |      |      |         | SOM GT:/0:82 0/1:124,29 C  | T |
|       |   |    |   |           |       |      |      | 0 0     | SOM GT:/0:9,(0/1:10,4:37T  | C |
|       |   |    |   | 0.0:0.008 | 0.213 | 1,N  |      |         | SOM GT:/0:21 0/1:374,82 G  | A |
|       |   |    |   | 0.0:0.032 | 0.437 | 1,N  | 2.41 |         | SOM GT:/0:64 0/1:105,15 C  | T |
|       |   |    |   |           |       |      |      |         | SOM GT:/0:16 0/1:14,6:37G  | A |
|       |   | ## | 0 | 0.0:0.995 | 1.0,D | 1.00 | 3.6  | 2.21    | SOM GT:/0:57 0/1:89,13:3 C | T |
|       |   | ## | 0 |           |       |      |      |         | SOM GT:/0:72 0/1:118,16 C  | T |
| 4E-04 |   |    |   |           |       |      |      | 0       | SOM GT:/0:31 0/1:75,11:3 G | A |
| 0.002 | 0 | 0  | 0 |           |       |      | 3.33 |         | SOM GT:/0:17 0/1:267,33 G  | A |
|       |   |    |   |           |       |      |      | 0       | SOM GT:/0:13 0/1:12,3:37C  | T |
|       |   |    |   |           |       |      |      |         | SOM GT:/0:12 0/1:20,3:37A  | G |
| 2E-04 |   | ## | 0 | 0.0:0.997 | 1.0,D | 1.00 | 4.6  | 3.93    | SOM GT:/0:11 0/1:197,39 G  | A |
|       |   |    |   |           |       |      |      |         | SOM GT:/0:59 0/1:37,11:3 A | G |
|       |   |    |   |           |       |      |      |         | SOM GT:/0:8,(0/1:15,3:28C  | T |
|       |   |    |   |           |       |      |      | 0.1 0.1 | SOM GT:/0:38 0/1:58,4:37G  | A |
|       |   |    |   |           |       |      |      | 0 0     | SOM GT:/0:58 0/1:108,7:3 C | A |
|       |   |    |   |           |       |      |      | 0 0.1   | SOM GT:/0:9,(0/1:15,5:37G  | A |
|       |   |    |   |           |       |      |      | 0 0.1   | SOM GT:/0:8,(0/1:17,3:37C  | A |
|       |   |    |   |           |       |      |      | 0.2 0.4 | SOM GT:/0:14 0/1:19,8:37C  | T |
|       |   |    |   |           |       |      |      |         | SOM GT:/0:78 0/1:115,14 G  | A |
|       |   |    |   |           |       |      |      |         | SOM GT:/0:11 0/1:203,8:3 C | A |
| 2E-04 |   |    |   |           |       |      |      |         | SOM GT:/0:70 0/1:104,6:3 G | C |
|       |   |    |   |           |       |      |      |         | SOM GT:/0:9,(0/1:1,5:34: C | T |
|       |   |    |   |           |       |      |      | 0.3 0.6 | SOM GT:/0:9,(0/1:14,4:37T  | C |
|       |   |    |   |           |       |      |      | 0.3 0.5 | SOM GT:/0:9,(0/1:14,3:37C  | T |
|       |   |    |   |           |       |      |      | 0.1 0.2 | DB;:GT:/0:33 0/1:55,4:37G  | C |
|       |   |    |   |           |       |      |      |         | SOM GT:/0:30 0/1:63,5:37C  | T |
|       |   |    |   |           |       |      |      |         | SOM GT:/0:31 0/1:30,7:37T  | C |
|       |   |    |   |           |       |      |      |         | SOM GT:/0:33 0/1:50,9:37A  | G |
|       |   |    |   |           |       |      | 2.5  |         | SOM GT:/0:24 0/1:36,5:37C  | G |
|       |   |    |   |           |       |      |      |         | SOM GT:/0:75 0/1:100,20 A  | G |
|       |   |    |   |           |       |      |      |         | SOM GT:/0:18 0/1:26,10:3 C | T |
|       |   |    |   | 0.5:0.106 | 0.245 | 1,N  |      |         | SOM GT:/0:11 0/1:181,31 C  | T |
|       |   |    |   |           |       |      |      |         | SOM GT:/0:14 0/1:23,8:37A  | G |
|       |   |    |   |           |       |      |      |         | SOM GT:/0:21 0/1:32,9:37G  | T |
|       |   |    |   |           |       |      |      |         | SOM GT:/0:37 0/1:52,5:37C  | T |
|       |   |    |   |           |       |      | 3.8  |         | SOM GT:/0:28 0/1:39,7:37C  | T |
|       |   | ## | 0 |           |       |      | 1.49 |         | SOM GT:/0:22 0/1:33,11:3 A | G |
|       |   |    |   |           |       |      |      | 0       | SOM GT:/0:47 0/1:67,11:3 C | T |
|       |   |    |   |           |       |      |      |         | SOM GT:/0:12 0/1:8,3:37: T | G |
|       |   |    |   |           |       |      |      |         | SOM GT:/0:10 0/1:24,4:37C  | T |
|       |   |    |   |           |       |      | 1.71 |         | SOM GT:/0:22 0/1:36,5:37C  | T |
|       |   | ## | 0 |           |       |      |      |         | SOM GT:/0:51 0/1:96,22:3 G | A |

|       |    |    |     |       |       |      |      |      |     |     |     |      |             |             |   |
|-------|----|----|-----|-------|-------|------|------|------|-----|-----|-----|------|-------------|-------------|---|
|       | ## | 0  | 0.0 | 0.993 | 1.0,D | 1.00 | 4.8  | 4.76 |     | SOM | GT: | 0:30 | 0/1:57,17:3 | T           |   |
|       |    |    |     |       |       |      |      |      |     | SOM | GT: | 0:28 | 0/1:46,6:37 | A           |   |
|       |    |    |     |       |       |      |      |      |     | SOM | GT: | 0:93 | 0/1:133,34  | A           |   |
|       |    |    |     |       |       |      |      |      |     | SOM | GT: | 0:42 | 0/1:73,17:3 | C           |   |
|       |    |    | 0.0 | 0.998 | 1.0,D | 1.00 | 5    | 2.65 |     | SOM | GT: | 0:36 | 0/1:69,14:3 | A           |   |
|       |    |    | 0.0 | 0.996 | 1.0,D | 1.00 | 5.3  | 3.79 |     | SOM | GT: | 0:44 | 0/1:81,20:3 | C           |   |
|       |    |    |     |       |       |      |      |      |     | SOM | GT: | 0:29 | 0/1:39,9:37 | T           |   |
|       |    |    |     |       |       |      |      |      |     | SOM | GT: | 0:16 | 0/1:30,5:37 | C           |   |
|       |    |    |     |       |       |      |      |      |     | SOM | GT: | 0:34 | 0/1:46,11:3 | A           |   |
|       |    |    | 0.0 | 0.987 | 1.0,D | 1.00 | 5.3  | 4.28 |     | SOM | GT: | 0:73 | 0/1:109,13  | A           |   |
|       |    |    |     |       |       |      |      |      |     | SOM | GT: | 0:23 | 0/1:44,5:37 | C           |   |
|       |    |    |     |       |       |      |      |      |     | SOM | GT: | 0:12 | 0/1:13,6:35 | A           |   |
|       |    |    |     |       |       |      |      |      |     | SOM | GT: | 0:53 | 0/1:88,13:3 | A           |   |
| 2E-04 | ## |    | 0.0 | 0.96  | 1.0,D | 0.99 |      | 2.81 |     | SOM | GT: | 0:10 | 0/1:135,30  | T           |   |
|       |    |    |     |       |       |      |      |      |     | SOM | GT: | 0:18 | 0/1:41,8:35 | T           |   |
|       | ## | 0  | 0.0 | 0.998 | 1.0,D | 1,D  | 5    | 4.64 |     | SOM | GT: | 0:72 | 0/1:98,18:3 | A           |   |
|       | ## | 0  |     |       |       |      |      |      |     | SOM | GT: | 0:14 | 0/1:240,38  | T           |   |
|       | 0  |    |     |       |       |      |      |      |     | SOM | GT: | 0:35 | 0/1:94,26:3 | T           |   |
|       |    |    |     |       |       |      |      |      |     | SOM | GT: | 0:15 | 0/1:32,3:37 | A           |   |
|       |    |    |     |       |       |      |      |      |     | SOM | GT: | 0:20 | 0/1:35,4:34 | A           |   |
|       | ## | 0  | 0.0 | 0.997 | 1.0,D | 0.99 | 5.5  | 3.51 |     | SOM | GT: | 0:90 | 0/1:131,28  | A           |   |
|       |    |    | 0.4 | 0.329 | 0.837 | 0.99 | 4.5  | 1.36 |     | SOM | GT: | 0:36 | 0/1:72,11:3 | A           |   |
|       |    |    |     |       |       |      |      |      | 0.1 | 0.3 | SOM | GT:  | 0:17        | 0/1:36,4:37 | A |
|       |    |    |     |       |       |      |      |      | 0   | 0.1 | SOM | GT:  | 0:10        | 0/1:11,6:35 | C |
|       |    |    |     |       |       |      |      |      |     |     | SOM | GT:  | 0:23        | 0/1:28,7:37 | A |
|       |    |    |     |       |       |      |      |      | 0.2 | 0.3 | DB; | GT:  | 0:19        | 0/1:36,5:37 | C |
|       |    |    |     |       |       |      |      |      |     |     | SOM | GT:  | 0:49        | 0/1:90,15:3 | G |
| 4E-04 | ## | 0  |     |       |       |      |      |      |     |     | SOM | GT:  | 0:16        | 0/1:284,46  | G |
|       |    |    |     |       |       |      | 2.51 | 0    |     |     | SOM | GT:  | 0:8         | 0/1:19,5:19 | T |
| 0.002 | 0  | 0  |     |       |       |      |      |      |     |     | SOM | GT:  | 0:59        | 0/1:61,6:37 | G |
|       |    |    |     |       |       |      |      |      | 0   | 0   | SOM | GT:  | 0:61        | 0/1:90,5:37 | C |
|       |    |    |     |       |       |      |      |      |     |     | SOM | GT:  | 0:24        | 0/1:39,3:37 | G |
|       | ## | 0  |     |       |       |      |      |      |     |     | SOM | GT:  | 0:14        | 0/1:213,40  | G |
|       | ## | 0  |     |       |       |      |      |      |     |     | SOM | GT:  | 0:12        | 0/1:188,41  | G |
|       |    |    |     |       |       |      |      |      |     |     | SOM | GT:  | 0:11        | 0/1:166,24  | G |
|       | ## | ## | 0   |       |       |      |      |      |     |     | SOM | GT:  | 0:52        | 0/1:63,14:3 | G |
| 2E-04 | ## | ## | 0   |       |       |      |      |      |     |     | SOM | GT:  | 0:59        | 0/1:120,25  | C |
|       |    |    | 0.0 | 0.265 | 0.745 | 1,N  |      | 1.99 |     |     | SOM | GT:  | 0:12        | 0/1:216,34  | G |
|       |    |    | 0.0 | 0.002 | 0.009 | 0.76 | 3.3  | 2.16 |     |     | SOM | GT:  | 0:11        | 0/1:175,39  | C |
|       |    |    |     |       |       |      | 2.3  |      |     |     | SOM | GT:  | 0:44        | 0/1:70,11:3 | G |
|       | ## | 0  | 0.2 | 0.019 | 0.127 | 0.99 | 3.7  | 1.77 |     |     | SOM | GT:  | 0:10        | 0/1:14,5:37 | G |
|       |    |    |     |       |       |      |      |      |     |     | SOM | GT:  | 0:44        | 0/1:89,6:37 | C |
|       |    |    |     |       |       |      |      |      |     |     | SOM | GT:  | 0:22        | 0/1:33,9:37 | C |
| 4E-04 |    |    |     |       |       |      |      |      |     |     | SOM | GT:  | 0:45        | 0/1:73,16:3 | C |
|       |    |    |     |       |       |      |      |      |     |     | SOM | GT:  | 0:50        | 0/1:85,13:3 | T |
|       |    |    |     |       |       |      |      |      |     |     | SOM | GT:  | 0:20        | 0/1:44,10:3 | G |
| 1E-03 | 0  | 0  |     |       |       |      |      |      |     |     | SOM | GT:  | 0:15        | 0/1:33,4:37 | G |
|       |    |    |     |       |       |      | 2.2  |      |     |     | SOM | GT:  | 0:27        | 0/1:40,6:37 | C |
|       |    |    |     |       |       |      | 4    | 2.97 |     |     | SOM | GT:  | 0:81        | 0/1:137,28  | G |
|       |    |    |     |       |       |      |      |      |     |     | SOM | GT:  | 0:16        | 0/1:24,5:34 | T |
|       |    |    |     |       |       |      |      |      |     |     | SOM | GT:  | 0:18        | 0/1:45,8:37 | T |
|       |    |    |     |       |       |      |      |      |     |     | SOM | GT:  | 0:49        | 0/1:81,13:3 | G |
|       | ## | ## | 0   |       |       |      |      |      |     |     | SOM | GT:  | 0:72        | 0/1:109,16  | C |
|       |    |    |     |       |       |      |      |      |     |     | SOM | GT:  | 0:42        | 0/1:67,13:3 | C |

|       |    |    |     |       |       |       |     |      |      |   |     |          |             |             |   |   |
|-------|----|----|-----|-------|-------|-------|-----|------|------|---|-----|----------|-------------|-------------|---|---|
| 2E-04 | ## | 0  | 0   | 0.2   | 0.205 | 0.863 | 1,N | 2.01 | 0    | 0 | SOM | GT:/0:66 | 0/1:153,27  | G           | A |   |
| 2E-04 | .  | .  | .   | .     | .     | .     | .   | .    | .    | . | SOM | GT:/0:47 | 0/1:64,6:37 | C           | T |   |
| .     | .  | .  | .   | .     | .     | .     | 1,A | 4.5  | 7.78 | . | SOM | GT:/0:53 | 0/1:83,15:3 | G           | A |   |
| .     | .  | .  | .   | .     | .     | .     | .   | .    | .    | . | SOM | GT:/0:10 | 0/1:30,5:37 | C           | A |   |
| .     | ## | 0  | .   | .     | .     | .     | .   | .    | .    | . | SOM | GT:/0:75 | 0/1:137,28  | A           | G |   |
| .     | .  | .  | 0.0 | 1.0,D | 1.0,D | 1,D   |     | 4.9  | 4.46 | . | SOM | GT:/0:17 | 0/1:297,53  | G           | A |   |
| .     | .  | .  | 0.0 | 0.781 | 0.99  | 0.99  |     | 4.4  | 3.54 | . | SOM | GT:/0:14 | 0/1:285,62  | G           | A |   |
| 2E-04 | .  | .  | .   | .     | .     | .     | .   | .    | .    | . | SOM | GT:/0:82 | 0/1:164,27  | C           | T |   |
| .     | .  | .  | .   | .     | .     | .     | .   | .    | .    | . | SOM | GT:/0:26 | 0/1:429,80  | C           | T |   |
| 1E-03 | .  | .  | .   | .     | .     | .     | .   | .    | .    | 0 | SOM | GT:/0:49 | 0/1:90,18:3 | C           | T |   |
| .     | .  | .  | 0.2 | 0.975 | 0.99  | 0.99  |     | 5.6  | 4.50 | . | SOM | GT:/0:54 | 0/1:89,19:3 | C           | T |   |
| .     | ## | 0  | 0.4 | 0.002 | 0.035 | 1,N   |     | .    | .    | . | SOM | GT:/0:12 | 0/1:154,35  | G           | A |   |
| .     | .  | .  | 0.0 | 0.721 | 0.948 | 1,D   |     | 5.4  | 5.33 | . | SOM | GT:/0:86 | 0/1:154,8:3 | C           | T |   |
| 2E-04 | ## | 0  | 0.0 | 0.998 | 1.0,D | 1,D   |     | 4.4  | 3.92 | . | SOM | GT:/0:69 | 0/1:138,20  | C           | T |   |
| .     | .  | .  | .   | .     | .     | .     | .   | .    | .    | . | SOM | GT:/0:26 | 0/1:52,6:37 | C           | A |   |
| .     | .  | .  | .   | .     | .     | .     | .   | .    | .    | . | SOM | GT:/0:36 | 0/1:30,12:3 | G           | A |   |
| 2E-04 | ## | 0  | .   | .     | .     | .     | .   | .    | .    | . | SOM | GT:/0:82 | 0/1:120,20  | C           | T |   |
| .     | .  | .  | .   | .     | .     | .     | .   | .    | .    | . | SOM | GT:/0:22 | 0/1:28,5:37 | G           | A |   |
| 2E-04 | .  | .  | .   | .     | .     | .     | .   | .    | .    | 0 | 0   | SOM      | GT:/0:13    | 0/1:13,3:37 | C | T |
| .     | .  | .  | .   | .     | .     | .     | .   | .    | .    | 0 | 0   | DB;      | GT:/0:37    | 0/1:79,4:34 | C | T |
| .     | .  | .  | .   | .     | .     | .     | .   | 2.2  | 1.77 | . | SOM | GT:/0:26 | 0/1:51,12:3 | C           | T |   |
| .     | .  | .  | .   | .     | .     | .     | .   | 5.5  | 2.28 | . | SOM | GT:/0:30 | 0/1:54,10:3 | A           | G |   |
| .     | .  | .  | .   | .     | .     | .     | .   | .    | .    | . | SOM | GT:/0:16 | 0/1:32,5:37 | T           | C |   |
| .     | .  | .  | .   | .     | .     | .     | .   | .    | .    | . | SOM | GT:/0:65 | 0/1:127,33  | G           | A |   |
| .     | .  | .  | 0.0 | 0.218 | 0.937 | 1,N   |     | 2.7  | 1.74 | . | SOM | GT:/0:12 | 0/1:160,42  | G           | A |   |
| .     | .  | .  | .   | .     | .     | .     | .   | .    | .    | . | SOM | GT:/0:75 | 0/1:115,22  | C           | A |   |
| .     | .  | .  | .   | .     | .     | .     | .   | .    | .    | . | SOM | GT:/0:15 | 0/1:31,3:37 | C           | A |   |
| .     | .  | .  | .   | .     | .     | .     | .   | .    | .    | . | SOM | GT:/0:52 | 0/1:100,5:3 | G           | A |   |
| .     | .  | .  | .   | .     | .     | .     | .   | .    | .    | . | SOM | GT:/0:8, | 0/1:7,3:37  | G           | A |   |
| .     | .  | .  | .   | .     | .     | .     | .   | 3.7  | .    | . | SOM | GT:/0:21 | 0/1:341,55  | G           | A |   |
| 2E-04 | ## | ## | 0   | .     | .     | .     | .   | .    | .    | . | SOM | GT:/0:54 | 0/1:122,21  | C           | T |   |
| .     | .  | .  | .   | .     | .     | .     | .   | .    | .    | . | SOM | GT:/0:53 | 0/1:69,12:3 | G           | A |   |
| .     | .  | .  | 0.0 | 0.99  | 1.0,D | 1.00  |     | 4.8  | 4.78 | . | SOM | GT:/0:96 | 0/1:212,25  | C           | T |   |
| .     | .  | .  | .   | .     | .     | .     | .   | .    | .    | . | SOM | GT:/0:20 | 0/1:37,11:3 | C           | T |   |
| .     | .  | .  | .   | .     | .     | .     | .   | .    | .    | . | SOM | GT:/0:19 | 0/1:27,11:3 | A           | G |   |
| .     | .  | .  | .   | .     | .     | .     | .   | .    | .    | . | SOM | GT:/0:22 | 0/1:35,10:3 | T           | G |   |
| .     | .  | .  | .   | .     | .     | .     | .   | .    | .    | . | SOM | GT:/0:50 | 0/1:87,12:3 | A           | C |   |
| .     | .  | .  | .   | .     | .     | .     | .   | .    | .    | . | SOM | GT:/0:70 | 0/1:130,19  | T           | C |   |
| .     | .  | .  | .   | .     | .     | .     | .   | .    | .    | . | SOM | GT:/0:51 | 0/1:90,17:3 | T           | C |   |
| .     | .  | .  | .   | .     | .     | .     | .   | 2.1  | .    | . | SOM | GT:/0:37 | 0/1:50,13:3 | G           | T |   |
| .     | .  | .  | .   | .     | .     | .     | .   | .    | .    | . | SOM | GT:/0:17 | 0/1:14,5:37 | C           | T |   |
| .     | .  | .  | 0.0 | 1.0,D | 1.0,D | 1,D   |     | 5.6  | 4.37 | . | SOM | GT:/0:11 | 0/1:183,32  | C           | T |   |
| .     | .  | .  | .   | .     | .     | .     | .   | 1.86 | .    | . | SOM | GT:/0:71 | 0/1:111,28  | G           | A |   |
| .     | ## | 0  | 0.0 | 0.456 | 0.916 | 1,N   |     | 2.58 | .    | . | SOM | GT:/0:61 | 0/1:96,13:3 | C           | T |   |
| .     | .  | .  | .   | .     | .     | .     | .   | .    | .    | . | SOM | GT:/0:71 | 0/1:99,18:3 | C           | T |   |
| .     | .  | .  | .   | .     | .     | .     | .   | .    | .    | . | SOM | GT:/0:94 | 0/1:125,34  | T           | C |   |
| .     | .  | .  | .   | .     | .     | .     | .   | .    | .    | . | SOM | GT:/0:15 | 0/1:31,8:37 | C           | T |   |
| .     | .  | .  | .   | .     | .     | .     | .   | .    | .    | . | SOM | GT:/0:58 | 0/1:52,17:3 | T           | A |   |
| .     | .  | .  | .   | .     | .     | .     | .   | .    | .    | . | SOM | GT:/0:64 | 0/1:132,10  | C           | A |   |
| .     | .  | .  | .   | .     | .     | .     | .   | 3    | 4.36 | . | SOM | GT:/0:12 | 0/1:20,6:37 | G           | A |   |
| .     | .  | .  | .   | .     | .     | .     | .   | .    | .    | . | SOM | GT:/0:43 | 0/1:40,5:31 | T           | C |   |
| .     | .  | .  | .   | .     | .     | .     | .   | .    | .    | . | SOM | GT:/0:29 | 0/1:49,7:35 | A           | C |   |
| .     | .  | .  | .   | .     | .     | .     | .   | .    | .    | . | SOM | GT:/0:45 | 0/1:73,9:35 | A           | C |   |
| .     | .  | .  | .   | .     | .     | .     | .   | 5.2  | 3.80 | . | SOM | GT:/0:30 | 0/1:50,4:37 | A           | C |   |

|       |    |    |     |                    |     |       |       |       |   |                           |   |
|-------|----|----|-----|--------------------|-----|-------|-------|-------|---|---------------------------|---|
| .     | .  | .  | .   | .                  | .   | .     | .     | 1.99. | . | SOMGT:/0:12 0/1:176,35 G  | A |
| .     | .  | .  | .   | .                  | .   | .     | .     | .     | . | SOMGT:/0:42 0/1:60,6:37 G | A |
| .     | .  | .  | .   | .                  | .   | .     | .     | .     | . | SOMGT:/0:99 0/1:134,15 C  | T |
| .     | .  | .  | .   | .                  | .   | .     | .     | .     | . | SOMGT:/0:86 0/1:170,13 G  | T |
| .     | .  | 0  | 0   | .                  | .   | .     | .     | .     | . | SOMGT:/0:21 0/1:308,65 C  | T |
| .     | ## | ## | 0   | 0.3:0.0340.507 1,D | 3.3 | 3.27. | .     | .     | . | SOMGT:/0:14 0/1:234,47 G  | A |
| .     | .  | ## | 0   | 0.1:0.8430.999 1,D | 4   | 4.03. | .     | .     | . | SOMGT:/0:12 0/1:191,37 C  | T |
| .     | .  | .  | .   | .                  | .   | .     | .     | .     | . | SOMGT:/0:14 0/1:259,34 G  | T |
| .     | .  | .  | .   | .                  | .   | 2.7   | 1.77. | .     | . | SOMGT:/0:38 0/1:59,18:3 G | A |
| .     | .  | ## | 0   | .                  | .   | .     | .     | .     | . | SOMGT:/0:89 0/1:156,34 C  | T |
| .     | .  | .  | .   | .                  | .   | 4.2   | 1.57. | .     | . | SOMGT:/0:65 0/1:100,12 C  | T |
| .     | .  | .  | 0.0 | 0.1040.7030.96     | 2.4 | 1.63. | .     | .     | . | SOMGT:/0:63 0/1:138,25 G  | A |
| .     | .  | .  | .   | .                  | .   | .     | .     | .     | . | SOMGT:/0:14 0/1:13,4:37 G | A |
| .     | .  | ## | 0   | 0.3:0.0390.585 1,D | 3.6 | 1.69. | .     | .     | . | SOMGT:/0:11 0/1:192,25 C  | T |
| .     | .  | .  | .   | .                  | .   | .     | .     | .     | . | SOMGT:/0:42 0/1:58,12:3 G | T |
| .     | .  | .  | 0.3 | 0.0790.357 1,D     | 4.6 | 3.14. | .     | .     | . | SOMGT:/0:74 0/1:102,19 A  | C |
| .     | .  | .  | 0.0 | 0.1240.2060.98     | 5.8 | 1.66. | .     | .     | . | SOMGT:/0:10 0/1:171,22 G  | T |
| .     | .  | .  | .   | .                  | .   | .     | .     | .     | . | SOMGT:/0:14 0/1:22,8:37 T | C |
| .     | .  | .  | .   | .                  | 1,D | 5.1   | 3.90. | .     | . | SOMGT:/0:11 0/1:228,8:3 C | T |
| .     | .  | .  | .   | .                  | .   | .     | .     | .     | . | SOMGT:/0:94 0/1:147,23 G  | A |
| .     | .  | .  | .   | .                  | .   | 2.4   | .     | .     | . | SOMGT:/0:22 0/1:48,8:35 A | G |
| .     | .  | .  | .   | .                  | .   | .     | .     | .     | . | SOMGT:/0:8,(0/1:33,3:37 T | G |
| .     | .  | .  | .   | .                  | .   | .     | .     | .     | . | SOMGT:/0:11 0/1:221,8:3 G | C |
| .     | .  | .  | .   | .                  | .   | .     | .     | .     | . | SOMGT:/0:29 0/1:327,12 A  | G |
| .     | .  | .  | .   | .                  | .   | .     | .     | .     | . | DB;:GT:/0:30 0/1:344,10 C | A |
| .     | .  | .  | .   | .                  | .   | .     | .     | .     | . | SOMGT:/0:8,(0/1:44,4:34 A | G |
| .     | .  | .  | .   | .                  | .   | .     | .     | .     | . | SOMGT:/0:10 0/1:69,7:37 T | G |
| .     | .  | .  | .   | .                  | .   | .     | .     | .     | . | SOMGT:/0:10 0/1:36,16:3 T | C |
| .     | .  | .  | .   | .                  | .   | .     | .     | .     | . | SOMGT:/0:10 0/1:47,4:34 T | G |
| .     | .  | .  | .   | .                  | .   | .     | .     | .     | . | SOMGT:/0:8,(0/1:157,8:3 A | C |
| .     | .  | .  | .   | .                  | .   | .     | .     | 0.    | . | SOMGT:/0:17 0/1:143,6:3 G | A |
| .     | .  | .  | .   | .                  | .   | .     | .     | .     | . | SOMGT:/0:9,(0/1:20,4:37 C | A |
| .     | .  | .  | .   | .                  | .   | .     | .     | .     | . | SOMGT:/0:14 0/1:181,34 C  | A |
| 3E-04 | .  | .  | .   | .                  | .   | .     | .     | .     | . | SOMGT:/0:29 0/1:30,6:35 G | A |
| .     | .  | .  | .   | .                  | .   | .     | .     | .     | . | SOMGT:/0:60 0/1:80,16:3 G | C |
| .     | .  | ## | 0   | 0.0:0.9770.998 1,D | 4.6 | 3.56. | .     | .     | . | SOMGT:/0:96 0/1:199,41 C  | T |
| .     | .  | .  | 0.0 | 0.08920.999 0.98   | 2.9 | 1.95. | .     | .     | . | SOMGT:/0:11 0/1:216,42 C  | T |
| .     | .  | 0  | 0   | .                  | .   | .     | .     | .     | . | SOMGT:/0:16 0/1:18,4:37 G | A |
| .     | .  | .  | .   | .                  | .   | .     | .     | .     | . | SOMGT:/0:99 0/1:132,26 C  | A |
| .     | .  | .  | 0.0 | 0.0190.288 1.00    | 3.8 | 1.91. | .     | .     | . | SOMGT:/0:93 0/1:150,21 G  | A |
| .     | .  | .  | 0.1 | 0.993 1.0,D 1,D    | 4.5 | 4.69. | .     | .     | . | SOMGT:/0:30 0/1:46,9:35 C | T |
| .     | .  | .  | .   | .                  | .   | .     | .     | .     | . | SOMGT:/0:41 0/1:50,10:3 A | G |
| .     | .  | .  | .   | .                  | .   | .     | .     | .     | . | SOMGT:/0:77 0/1:120,20 G  | A |
| .     | .  | .  | .   | .                  | .   | .     | .     | .     | . | SOMGT:/0:11 0/1:6,4:37: G | T |
| .     | .  | .  | .   | .                  | 1,A | 6.1   | 9.05. | .     | . | SOMGT:/0:79 0/1:120,34 C  | A |
| .     | .  | .  | .   | .                  | .   | 2.8   | .     | .     | . | SOMGT:/0:8,(0/1:24,3:37 A | G |
| .     | .  | .  | 0.0 | 0.5810.9630.99     | 5   | 4.16. | .     | .     | . | SOMGT:/0:40 0/1:62,13:3 C | T |
| .     | .  | .  | 0.1 | 0.993 1.0,D 1.00   | 4.7 | 2.63. | .     | .     | . | SOMGT:/0:66 0/1:104,21 G  | A |
| .     | .  | .  | 0.0 | 0.93, 0.996 0.99   | 5.2 | 3.37. | .     | .     | . | SOMGT:/0:23 0/1:344,68 C  | A |
| .     | .  | .  | .   | .                  | .   | 1.55. | .     | .     | . | SOMGT:/0:24 0/1:25,9:37 C | T |
| .     | .  | .  | .   | .                  | .   | .     | .     | .     | . | SOMGT:/0:12 0/1:23,4:37 T | C |
| .     | .  | .  | .   | .                  | .   | .     | .     | .     | . | SOMGT:/0:8,(0/1:14,5:37 G | A |
| .     | .  | .  | 0.0 | 0.999 1.0,D 1,D    | 3.9 | 4.36. | .     | .     | . | SOMGT:/0:85 0/1:134,21 G  | A |
| .     | .  | .  | 0.0 | 0.025 0.032 1.00   | .   | .     | .     | .     | . | SOMGT:/0:85 0/1:85,15:3 C | A |

|       |    |    |   |           |       |      |      |      |       |                             |   |
|-------|----|----|---|-----------|-------|------|------|------|-------|-----------------------------|---|
|       |    |    |   |           |       |      |      |      |       | SOM GT:/0:21 0/1:51,5:37 C  | T |
| 0.013 | 0  | 0  | 0 |           |       |      |      |      |       | SOM GT:/0:82 0/1:147,17 C   | T |
|       |    |    |   |           |       | 3.4  |      |      |       | SOM GT:/0:99 0/1:176,46 G   | A |
|       |    |    |   |           |       |      |      |      |       | SOM GT:/0:50 0/1:77,16:3 C  | A |
|       |    |    |   |           |       |      |      |      |       | SOM GT:/0:15 0/1:5,2:37: T  | C |
|       |    |    |   |           |       | 2.4  | 2.35 |      |       | SOM GT:/0:12 0/1:209,36 C   | T |
|       |    |    |   |           |       |      |      |      |       | SOM GT:/0:41 0/1:82,11:3 C  | T |
|       |    |    |   |           |       |      |      |      |       | SOM GT:/0:10 0/1:36,9:34 G  | A |
|       | ## | 0  | 0 | 1.0,0.032 | 0.075 | 0.92 | 2.9  |      | 0     | SOM GT:/0:64 0/1:102,19 C   | T |
|       |    |    |   |           |       |      |      |      |       | SOM GT:/0:9,(0/1:11,4:37 A  | G |
|       |    |    |   |           |       |      |      |      |       | SOM GT:/0:13 0/1:28,7:35 C  | A |
|       |    |    |   |           |       |      |      |      |       | SOM GT:/0:57 0/1:78,14:3 C  | T |
|       |    |    |   |           |       |      |      |      |       | SOM GT:/0:32 0/1:47,8:37 G  | T |
|       |    |    |   |           |       |      |      | 1.46 |       | SOM GT:/0:29 0/1:35,3:37 A  | G |
|       |    |    |   |           |       |      |      |      |       | SOM GT:/0:16 0/1:21,9:35 G  | A |
|       |    |    |   |           |       |      |      |      |       | SOM GT:/0:69 0/1:87,16:3 C  | T |
|       |    | 0  | 0 |           |       |      |      |      | 0 0   | SOM GT:/0:69 0/1:121,10 C   | T |
|       |    |    |   | 0.0:0.698 | 0.955 | 1.00 | 5.3  | 2.25 |       | SOM GT:/0:61 0/1:120,25 G   | A |
|       |    | ## | 0 |           |       |      |      |      |       | SOM GT:/0:10 0/1:205,29 C   | T |
|       |    |    |   | 0.0:0.897 | 0.992 | 1.00 | 4.8  | 4.69 |       | SOM GT:/0:93 0/1:158,13 G   | T |
|       |    |    |   |           |       |      |      |      |       | SOM GT:/0:36 0/1:73,18:3 G  | A |
|       |    | ## | 0 |           |       |      |      |      |       | SOM GT:/0:75 0/1:108,36 G   | A |
|       |    |    |   |           |       |      |      |      | 0     | SOM GT:/0:46 0/1:65,14:3 G  | A |
|       |    |    |   |           |       |      |      | 1.53 |       | SOM GT:/0:15 0/1:8,3:37: G  | A |
|       |    |    |   |           |       |      |      | 4    | 1.79  | SOM GT:/0:86 0/1:182,15 G   | A |
|       |    |    |   |           |       |      |      |      | 0     | SOM GT:/0:14 0/1:25,6:37 C  | T |
|       |    |    |   |           |       |      |      |      |       | SOM GT:/0:18 0/1:260,52 G   | A |
|       |    | ## | 0 | 0.1:0.128 | 0.6,P | 1,D  | 4.7  | 3.31 |       | SOM GT:/0:56 0/1:97,22:3 C  | T |
|       |    |    |   |           |       |      |      |      |       | SOM GT:/0:36 0/1:92,19:3 C  | T |
|       |    |    |   |           |       |      |      | 1.48 |       | SOM GT:/0:27 0/1:54,9:37 G  | A |
|       |    |    |   | 0.0:0.982 | 1.0,D | 1,D  | 4.2  | 2.12 |       | SOM GT:/0:52 0/1:64,20:3 A  | G |
|       |    |    |   |           |       |      |      |      |       | SOM GT:/0:9,(0/1:6,3:37: C  | T |
|       |    |    |   |           |       |      |      |      |       | SOM GT:/0:34 0/1:411,49 C   | T |
|       |    |    |   |           |       |      |      |      |       | SOM GT:/0:27 0/1:325,56 A   | T |
|       |    |    |   |           |       |      |      |      |       | SOM GT:/0:19 0/1:148,50 T   | C |
| 2E-04 |    |    |   |           |       |      |      |      |       | SOM GT:/0/1:0:41,0:..:41 C  | T |
|       |    |    |   |           |       |      |      |      | 0 0.1 | SOM GT:/0/1:0:9,0:..:6:0: C | T |
|       |    |    |   |           |       |      |      |      | 0 0   | SOM GT:/0/1:0:17,0:..:16 A  | C |
|       |    |    |   |           |       |      |      |      | 0 0   | SOM GT:/0/1:0:9,0:..:10:0 T | C |
|       |    |    |   |           |       | 1,D  | 5.6  | 4.73 |       | SOM GT:/0/1:0:18,0:..:18 C  | A |
|       |    |    |   |           |       |      |      |      | 0 0   | SOM GT:/0/1:0:13,0:..:16 G  | C |
|       |    |    |   |           |       |      |      |      | 0 0.1 | SOM GT:/0/1:0:8,0:..:8:0: G | T |
|       |    |    |   |           |       |      |      |      | 0     | SOM GT:/0/1:0:11,0:..:11 T  | C |
|       |    |    |   |           |       |      |      |      |       | SOM GT:/0/1:0:82,0:..:82 G  | T |
|       |    |    |   |           |       |      |      |      |       | SOM GT:/0/1:0:28,0:..:28 G  | T |
|       |    |    |   |           |       |      |      |      | 0 0   | SOM GT:/0/1:0:13,0:..:13 G  | C |
| 4E-04 | ## | 0  | 0 |           |       |      |      | 1.33 | 0 0   | DB;GT:/0/1:0:49,0:..:49 G   | A |
|       |    | ## | 0 |           |       |      |      |      |       | SOM GT:/0/1:0:25,0:..:25 C  | T |
|       |    |    |   | 0.0:1.0,D | 1.0,D | 1,D  | 5.8  | 4.66 |       | SOM GT:/0/1:0:21,0:..:21 C  | A |
|       |    |    |   |           |       |      |      |      |       | SOM GT:/0/1:0:180,0:..:1: C | T |
|       |    |    |   |           |       |      |      |      | 0 0   | DB;GT:/0/1:0:35,0:..:35 A   | G |
|       |    |    |   |           |       |      |      |      | 0 0   | SOM GT:/0/1:0:13,0:..:10 G  | T |
|       |    |    |   |           |       |      |      | 3.4  |       | SOM GT:/0/1:0:58,0:..:58 T  | C |



|       |   |    |     |       |       |      |      |      |         |                              |   |
|-------|---|----|-----|-------|-------|------|------|------|---------|------------------------------|---|
|       |   |    |     |       |       |      |      |      |         | SOMGT:/0/1:/0:9,0:..9:0:A    | G |
|       |   |    |     |       |       |      |      |      |         | SOMGT:/0/1:/0:24,0:..24 T    | C |
|       |   |    |     |       |       |      |      |      |         | SOMGT:/0/1:/0:15,0:..15 C    | T |
|       |   |    |     |       |       |      |      |      |         | SOMGT:/0/1:/0:25,0:..25 C    | T |
| 4E-04 | 0 | ## | 0.5 | 0.005 | 0.007 | 1,N  |      |      |         | SOMGT:/0/1:/0:200,0:..2 G    | A |
|       |   | ## | 0   |       |       |      | 2.6  | 2.20 |         | SOMGT:/0/1:/0:51,0:..51 G    | A |
|       |   |    |     |       |       |      |      | 1.24 |         | SOMGT:/0/1:/0:20,0:..20 C    | T |
|       |   |    |     |       |       |      |      |      | 0 0     | SOMGT:/0/1:/0:9,0:..8:0:G    | T |
|       |   |    |     |       |       |      |      |      |         | SOMGT:/0/1:/0:12,0:..12 G    | T |
|       |   | 0  | 0   |       |       |      |      |      |         | SOMGT:/0/1:/0:38,1:..26 T    | C |
|       |   |    | 0.5 | 0.001 | 0.001 | 1,N  | 2.8  |      |         | SOMGT:/0/1:/0:30,0:..30 A    | C |
|       |   | ## | 0   | 0.0   | 0.02  | 1.00 | 5.5  | 3.45 |         | SOMGT:/0/1:/0:24,0:..24 G    | A |
|       |   |    |     |       |       |      |      | 1.63 |         | SOMGT:/0/1:/0:8,0:..8:0:A    | T |
|       |   | ## | 0   |       |       |      |      |      | 0       | SOMGT:/0/1:/0:128,0:..1:G    | A |
|       |   | ## | 0   | 0.0   | 0.35  | 0.97 | 1,N  | 1.80 | 0 0     | SOMGT:/0/1:/0:44,0:..44 C    | T |
|       |   |    |     |       |       |      |      |      |         | SOMGT:/0/1:/0:29,0:..29 G    | A |
|       |   |    |     |       |       |      |      |      | 0.1 0.2 | DB;SOMGT:/0/1:/0:35,0:..34 C | T |
| 0.075 |   | 0  | 0   | 0.00  | 0.01  | 1,N  |      | 0.2  | 0.2     | SOMGT:/0/1:/0:40,0:..30 T    | G |
|       |   | 0  | 0   |       |       |      |      | 0.3  | 0.2     | SOMGT:/0/1:/0:42,0:..31 A    | G |
|       |   |    |     |       |       |      |      |      |         | SOMGT:/0/1:/0:99,0:..99 C    | A |
|       |   |    |     |       |       |      |      |      | 0.1 0.1 | SOMGT:/0/1:/0:11,0:..6:CA    | G |
|       |   |    |     |       |       |      |      | 1.81 |         | SOMGT:/0/1:/0:9,0:..9:0:C    | A |
|       |   |    |     |       |       |      |      |      |         | SOMGT:/0/1:/0:51,0:..51 C    | T |
|       |   | 0  | 0   |       |       |      |      |      |         | SOMGT:/0/1:/0:9,0:..9:0:T    | C |
|       |   |    |     |       |       |      |      |      | 0 0.4   | SOMGT:/0/1:/0:13,0:..11 A    | C |
|       |   | 0  | 0   |       |       | 1,A  | 4.7  | 8.33 | 0.1 0   | DB;SOMGT:/0/1:/0:112,1:..1 G | A |
|       |   |    |     |       |       |      | 4.4  | 1.68 |         | SOMGT:/0/1:/0:183,0:..1:C    | T |
|       |   |    |     |       |       |      | 3.6  |      |         | SOMGT:/0/1:/0:22,0:..22 C    | G |
|       |   |    |     |       |       |      |      |      |         | SOMGT:/0/1:/0:26,0:..26 A    | T |
|       |   |    |     |       |       |      |      |      | 0       | SOMGT:/0/1:/0:39,1:..40 A    | G |
|       |   | ## | 0   |       |       |      |      |      | 0       | SOMGT:/0/1:/0:26,0:..26 G    | A |
| 0.144 |   | 0  | 0   |       |       |      |      |      | 0.1 0.1 | SOMGT:/0/1:/0:12,0:..12 A    | G |
|       |   |    |     |       |       |      |      |      |         | SOMGT:/0/1:/0:12,0:..12 G    | A |
|       |   |    |     |       |       |      |      |      | 0.3 0.4 | DB;SOMGT:/0/1:/0:33,1:..34 C | T |
|       |   |    |     |       |       |      | 3.1  | 1.70 |         | SOMGT:/0/1:/0:26,0:..26 G    | T |
|       |   |    |     |       |       |      | 2.4  | 2.84 |         | SOMGT:/0/1:/0:84,1:..86 G    | C |
|       |   | ## | ##  | 0     |       |      |      |      |         | SOMGT:/0/1:/0:14,0:..14 C    | T |
|       |   |    |     |       |       |      | 2.6  | 2.07 |         | SOMGT:/0/1:/0:16,0:..16 G    | A |
|       |   |    |     |       |       |      |      |      | 0 0.1   | SOMGT:/0/1:/0:9,0:..9:0:G    | C |
|       |   |    |     |       |       |      |      |      | 0 0.2   | SOMGT:/0/1:/0:11,0:..11 G    | C |
|       |   |    |     |       |       |      |      |      |         | SOMGT:/0/1:/0:56,1:..57 T    | G |
|       |   |    |     |       |       | 1,D  |      | 1.30 |         | SOMGT:/0/1:/0:213,0:..2 G    | A |
|       |   |    | 0.1 | 0.01  | 0.00  | 1.00 | 4.4  | 1.76 |         | SOMGT:/0/1:/0:89,0:..90 G    | C |
|       |   |    |     |       |       |      |      |      |         | SOMGT:/0/1:/0:19,0:..20 C    | G |
|       |   |    |     |       |       |      | 4    |      |         | SOMGT:/0/1:/0:85,0:..85 G    | C |
|       |   |    | 0.0 | 0.99  | 1.00  | 1,D  | 5.7  | 5.56 |         | SOMGT:/0/1:/0:20,0:..20 C    | T |
|       |   |    |     |       |       |      |      |      |         | SOMGT:/0/1:/0:30,0:..30 G    | C |
|       |   |    | 0.1 | 0.39  | 0.73  | 0.98 | 5    | 2.81 |         | SOMGT:/0/1:/0:26,0:..26 C    | T |
|       |   |    |     |       |       |      |      |      |         | SOMGT:/0/1:/0:9,0:..9:0:G    | A |
|       |   | ## | 0   | 0.0   | 0.99  | 1.0  | 1,D  | 4.8  | 5.21    | SOMGT:/0/1:/0:102,0:..1:G    | A |
|       |   |    |     |       |       |      | 2.5  | 1.40 |         | SOMGT:/0/1:/0:35,0:..36 C    | G |
|       |   |    |     |       |       |      |      |      |         | SOMGT:/0/1:/0:23,0:..23 G    | A |
|       |   |    |     |       |       |      | 1.24 |      |         | SOMGT:/0/1:/0:12,0:..12 C    | T |
|       |   |    |     |       |       |      | 2.5  |      |         | SOMGT:/0/1:/0:23,0:..23 C    | T |

|       |    |     |      |       |      |      |      |      |      |     |          |          |          |          |     |   |   |
|-------|----|-----|------|-------|------|------|------|------|------|-----|----------|----------|----------|----------|-----|---|---|
|       | ## | 0.0 | 0.99 | 1.0,D | 1,D  | 5.6  | 4.51 |      |      | SOM | GT:/0/1: | 0:17,0:  | :18      | G        | A   |   |   |
|       |    |     |      |       |      |      |      |      |      | SOM | GT:/0/1: | 0:52,0:  | :52      | T        | C   |   |   |
|       |    | 0.0 | 0.74 | 0.98  | 1.00 | 5.9  | 5.01 |      |      | SOM | GT:/0/1: | 0:31,0:  | :31      | C        | T   |   |   |
|       |    | 0.0 | 0.99 | 1.0   | 1,D  | 4.9  | 3.98 |      |      | SOM | GT:/0/1: | 0:47,0:  | :47      | C        | G   |   |   |
| 6E-04 |    |     |      |       |      |      |      |      |      | SOM | GT:/0/1: | 0:12,0:  | :12      | C        | T   |   |   |
|       |    |     |      |       |      |      |      |      |      | SOM | GT:/0/1: | 0:37,0:  | :37      | G        | C   |   |   |
|       |    |     |      |       |      | 3    | 1.75 |      |      | SOM | GT:/0/1: | 0:22,0:  | :22      | G        | T   |   |   |
|       |    | 0.0 |      |       | 0.99 | 2.2  |      |      |      | SOM | GT:/0/1: | 0:173,0: | :1       | G        | C   |   |   |
|       | ## | 0   | 0.0  | 0.43  | 2.0  | 1,D  | 5.2  | 3.79 |      | SOM | GT:/0/1: | 0:23,0:  | :23      | G        | A   |   |   |
|       |    |     |      |       |      |      |      |      |      | SOM | GT:/0/1: | 0:31,0:  | :31      | G        | C   |   |   |
|       |    |     |      |       |      |      |      |      |      | SOM | GT:/0/1: | 0:36,0:  | :36      | A        | G   |   |   |
|       |    | 0.0 | 0.92 | 4.0   | 0.99 | 1,D  | 3.2  | 3.19 |      | SOM | GT:/0/1: | 0:54,0:  | :54      | G        | T   |   |   |
|       |    | 0.4 | 0.01 | 5.0   | 0.02 | 1,D  | 4.2  |      |      | SOM | GT:/0/1: | 0:54,0:  | :55      | G        | A   |   |   |
|       |    |     |      |       |      |      |      |      |      | SOM | GT:/0/1: | 0:10,0:  | :10      | G        | C   |   |   |
|       | ## | 0   |      |       |      | 0.99 | 2.3  | 8.58 |      | SOM | GT:/0/1: | 0:61,0:  | :61      | G        | A   |   |   |
|       |    |     |      |       |      |      |      |      |      | SOM | GT:/0/1: | 0:55,0:  | :55      | G        | C   |   |   |
|       | ## | 0   | 0.0  | 0.90  | 0.99 | 1,D  | 5.8  | 5.70 |      | DB; | GT:/0/1: | 0:25,0:  | :25      | G        | A   |   |   |
|       |    | 0.0 | 0.00 | 2.0   | 0.00 | 2.0  | 0.81 | 3.23 |      | SOM | GT:/0/1: | 0:32,0:  | :32      | A        | C   |   |   |
|       |    |     |      |       |      |      |      |      |      | SOM | GT:/0/1: | 0:33,0:  | :33      | C        | T   |   |   |
|       |    | 0.0 | 0.39 | 4.0   | 0.81 | 7.0  | 1.00 | 5.6  | 2.56 |     | SOM      | GT:/0/1: | 0:39,0:  | :39      | G   | A |   |
|       |    |     |      |       |      |      |      |      |      | SOM | GT:/0/1: | 0:19,0:  | :19      | C        | T   |   |   |
|       |    | 0.0 | 0.72 | 1.0   | 0.94 | 1,D  | 5.3  | 5.17 |      | SOM | GT:/0/1: | 0:20,0:  | :21      | C        | T   |   |   |
|       |    | 0.0 | 0.99 | 1.0   | 1,D  | 1,D  | 6.2  | 4.90 |      | SOM | GT:/0/1: | 0:17,0:  | :17      | C        | G   |   |   |
|       |    |     |      |       |      |      |      |      |      | SOM | GT:/0/1: | 0:13,0:  | :13      | C        | T   |   |   |
|       |    |     |      |       |      |      |      |      | 0    | SOM | GT:/0/1: | 0:14,0:  | :14      | G        | C   |   |   |
|       |    | 0.0 | 0.99 | 1.0   | 1,D  | 1.00 | 5.6  | 4.57 |      | SOM | GT:/0/1: | 0:24,0:  | :24      | G        | C   |   |   |
|       |    | 0.1 | 0.00 | 1.0   | 0,B  | 1,N  |      |      |      | SOM | GT:/0/1: | 0:36,0:  | :37      | C        | T   |   |   |
| 0.007 | 0  | 0   | 0.1  | 0.15  | 3.0  | 0.76 | 0.63 | 3.9  | 1.85 | 0   | 0        | DB;      | GT:/0/1: | 0:37,0:  | :37 | C | T |
|       |    | 0.0 | 0.38 | 3.0   | 0.97 | 4.0  | 1.00 | 4.5  | 2.94 |     |          | SOM      | GT:/0/1: | 0:77,0:  | :77 | C | G |
|       |    |     |      |       |      |      |      |      |      | SOM | GT:/0/1: | 0:30,0:  | :31      | G        | A   |   |   |
|       |    | 0.6 | 0.00 | 6.0   | 0.05 | 1,D  | 4.2  | 2.60 |      | SOM | GT:/0/1: | 0:141,0: | :1       | G        | A   |   |   |
|       |    |     |      |       |      |      |      |      |      | SOM | GT:/0/1: | 0:8,0:   | :8       | 0        | A   |   |   |
|       |    | 0.3 | 0.0  | 0,B   | 0.00 | 1,N  |      |      |      | SOM | GT:/0/1: | 0:21,0:  | :21      | A        | G   |   |   |
|       |    |     |      |       |      |      |      |      |      | SOM | GT:/0/1: | 0:146,0: | :1       | G        | A   |   |   |
| 0.213 |    |     |      |       |      |      |      |      | 0.2  | 0.3 | DB;      | GT:/0/1: | 0:39,1:  | :40      | C   | T |   |
| 6E-04 |    |     |      |       |      |      |      |      | 0    | 0   | SOM      | GT:/0/1: | 0:8,0:   | :8       | 0   | A | G |
|       |    | 0.0 | 0.99 | 1.0   | 1,D  | 0.99 | 5.2  | 2.21 |      |     | SOM      | GT:/0/1: | 0:17,0:  | :17      | C   | G |   |
|       |    | 0.0 | 0.03 | 6.0   | 0.03 | 7.0  | 1.00 | 2.5  |      |     | SOM      | GT:/0/1: | 0:30,0:  | :30      | C   | T |   |
|       |    |     |      |       |      |      |      |      |      |     | SOM      | GT:/0/1: | 0:12,0:  | :12      | C   | T |   |
|       |    |     |      |       |      |      |      |      |      |     | SOM      | GT:/0/1: | 0:72,0:  | :73      | C   | G |   |
|       |    |     |      |       |      |      |      | 3.7  | 2.89 |     |          | SOM      | GT:/0/1: | 0:27,0:  | :27 | G | C |
|       |    |     |      |       |      |      |      |      | 0    |     |          | SOM      | GT:/0/1: | 0:29,0:  | :28 | C | A |
|       |    |     |      |       |      |      |      |      |      |     |          | SOM      | GT:/0/1: | 0:45,0:  | :45 | C | A |
|       |    |     |      |       |      |      |      | 4.8  | 1.97 |     |          | SOM      | GT:/0/1: | 0:54,0:  | :54 | C | T |
|       | ## | 0   |      |       |      |      |      |      |      |     |          | SOM      | GT:/0/1: | 0:44,0:  | :44 | G | C |
|       |    |     |      |       |      |      |      |      |      |     |          | SOM      | GT:/0/1: | 0:153,0: | :1  | G | A |
|       |    | 0.0 | 0.13 | 8.0   | 0.20 | 2,D  | 6.2  | 3.33 |      |     | SOM      | GT:/0/1: | 0:18,0:  | :18      | A   | T |   |
|       |    |     |      |       |      |      |      | 4    | 1.65 |     |          | SOM      | GT:/0/1: | 0:30,0:  | :30 | G | A |
|       |    | 0.2 | 0.01 | 2.0   | 0.00 | 4,N  |      | 1.51 |      |     |          | SOM      | GT:/0/1: | 0:39,0:  | :39 | C | T |
|       | ## | ##  | 0    | 0.0   | 0.67 | 4.0  | 0.99 | 2.0  | 0.98 | 3.8 | 1.87     | 0        |          |          | C   | T |   |
|       |    | 0   | 0    |       |      |      |      |      |      | 0.1 | 0        | DB;      | GT:/0/1: | 0:43,1:  | :38 | C | T |
|       |    |     |      |       |      |      |      |      |      |     |          | SOM      | GT:/0/1: | 0:22,0:  | :22 | G | A |
|       |    |     |      |       |      |      |      | 4.9  | 1.37 |     |          | SOM      | GT:/0/1: | 0:122,0: | :1  | G | A |
|       |    |     |      |       |      |      |      |      |      |     |          | SOM      | GT:/0/1: | 0:130,0: | :1  | C | T |

|       |    |    |     |       |       |       |       |      |      |                           |                           |                              |   |
|-------|----|----|-----|-------|-------|-------|-------|------|------|---------------------------|---------------------------|------------------------------|---|
|       |    |    |     |       |       |       |       |      |      | SOMGT:/0/1:/0:69,0:..70 T | A                         |                              |   |
|       |    |    | 0.0 | 0.978 | 0.999 | 1,D   | 6     | 2.81 |      | SOMGT:/0/1:/0:126,0:..1 C | T                         |                              |   |
|       |    |    |     |       |       |       |       |      |      | SOMGT:/0/1:/0:81,0:..81 G | A                         |                              |   |
| 0.433 |    | 1  | 1   |       |       |       |       |      | 0.1  | 0.5                       | SOMGT:/0/1:/0:44,1:..26 C | G                            |   |
|       |    |    |     |       |       |       |       |      |      |                           | SOMGT:/0/1:/0:87,0:..88 G | C                            |   |
|       |    |    |     |       |       |       |       |      |      |                           | SOMGT:/0/1:/0:114,0:..1 C | T                            |   |
|       |    |    |     |       |       |       |       | 1.76 |      |                           | SOMGT:/0/1:/0:33,0:..33 C | G                            |   |
|       |    |    |     |       |       |       |       |      |      |                           | SOMGT:/0/1:/0:130,0:..1 C | T                            |   |
|       |    |    |     |       |       |       |       |      |      |                           | SOMGT:/0/1:/0:163,0:..1 G | A                            |   |
|       |    |    |     |       |       |       |       | 3.9  | 1.41 |                           | SOMGT:/0/1:/0:43,0:..43 G | A                            |   |
|       |    |    |     |       |       |       |       |      |      |                           | SOMGT:/0/1:/0:51,0:..51 G | A                            |   |
|       |    |    |     |       |       |       |       |      |      |                           | SOMGT:/0/1:/0:35,0:..35 G | A                            |   |
| 0.205 |    |    |     |       |       |       |       |      |      | 0.1                       | 0                         | SOMGT:/0/1:/0:15,0:..13 T    | C |
|       |    |    |     | 0.0   | 0.998 | 1.0,D | 1,D   | 6.1  | 3.62 |                           |                           | SOMGT:/0/1:/0:44,0:..45 A    | G |
|       |    |    |     | 0.0   | 0.453 | 0.849 | 1.00  | 2.8  |      |                           |                           | SOMGT:/0/1:/0:24,0:..24 C    | G |
|       |    |    |     |       |       |       |       |      |      | 0                         | 0                         | SOMGT:/0/1:/0:15,0:..15 T    | A |
|       |    |    |     |       |       |       |       |      |      |                           |                           | SOMGT:/0/1:/0:16,0:..17 C    | T |
|       |    |    |     |       |       |       |       | 2.5  |      |                           |                           | SOMGT:/0/1:/0:29,0:..29 G    | A |
|       |    |    |     | 0.0   | 1.0,D | 1.0,D | 1,D   | 5    | 5.03 |                           |                           | DB;SOMGT:/0/1:/0:52,0:..52 G | A |
|       |    |    |     |       |       |       |       |      |      |                           |                           | SOMGT:/0/1:/0:14,0:..14 T    | A |
| 4E-04 | ## | ## | 0   | 0.947 | 0.997 | 1,D   | 6     | 5.36 |      |                           |                           | SOMGT:/0/1:/0:42,0:..42 G    | A |
| 4E-04 | 0  | 0  | 0   | 0.0   | 0.676 | 0.997 | 1.00  | 5.1  | 3.59 |                           |                           | DB;SOMGT:/0/1:/0:104,0:..1 C | T |
|       |    |    |     | 0.0   | 0.344 | 0.356 | 0.94  | 3.2  | 1.48 |                           |                           | SOMGT:/0/1:/0:46,0:..46 C    | G |
|       |    |    |     | 0.1   | 0.031 | 0.064 | 0.99  | 5.9  | 1.36 |                           |                           | SOMGT:/0/1:/0:31,0:..31 C    | T |
|       |    |    |     |       |       |       |       |      |      |                           |                           | SOMGT:/0/1:/0:28,0:..28 C    | G |
|       |    |    |     | 0.1   | 0.419 | 0.881 | 1.00  | 5.7  | 2.53 |                           |                           | SOMGT:/0/1:/0:37,0:..37 C    | G |
|       |    |    |     | 0.095 | 0.27  | 1,N   |       | 2.37 |      |                           |                           | SOMGT:/0/1:/0:49,0:..49 G    | A |
|       | 0  | 0  | 0   |       |       |       |       |      |      |                           |                           | SOMGT:/0/1:/0:27,0:..27 C    | T |
|       |    |    |     |       |       |       |       |      |      |                           |                           | SOMGT:/0/1:/0:14,0:..14 C    | T |
|       |    |    |     |       |       |       |       |      |      |                           |                           | SOMGT:/0/1:/0:8,0:..9:0 C    | T |
|       |    |    |     |       |       |       |       | 4.1  |      |                           |                           | SOMGT:/0/1:/0:43,0:..43 G    | A |
|       |    | ## | 0   | 0.0   | 1.0,D | 1.0,D | 1,D   | 4.6  | 4.45 |                           |                           | DB;SOMGT:/0/1:/0:81,0:..82 C | T |
|       |    |    |     |       |       |       |       |      |      |                           |                           | SOMGT:/0/1:/0:35,0:..35 G    | A |
|       |    |    | 0   | 0     |       |       |       |      |      | 0                         |                           | DB;SOMGT:/0/1:/0:58,1:..57 G | A |
|       |    |    |     |       |       |       |       |      |      | 0                         | 0                         | SOMGT:/0/1:/0:9,0:..8:0 C    | G |
|       |    |    | 0   | 0     |       |       |       |      |      | 0.4                       | 0.3                       | SOMGT:/0/1:/0:33,1:..30 T    | C |
| 0.073 |    |    |     |       |       |       |       |      |      | 0                         | 0.1                       | SOMGT:/0/1:/0:17,0:..17 G    | C |
|       |    |    |     |       |       |       |       |      |      |                           |                           | SOMGT:/0/1:/0:58,1:..59 G    | A |
| 4E-04 |    | 0  | 0   |       |       |       |       |      |      | 0                         | 0                         | SOMGT:/0/1:/0:49,0:..49 C    | T |
|       |    |    |     | 0.0   | 0.803 | 0.992 | 1,N   | 1.98 |      |                           |                           | SOMGT:/0/1:/0:81,0:..81 G    | A |
|       |    |    |     |       |       |       |       |      |      |                           |                           | SOMGT:/0/1:/0:60,0:..60 G    | C |
|       |    |    |     |       |       |       |       | 4.6  |      |                           |                           | SOMGT:/0/1:/0:14,0:..14 G    | A |
|       |    |    |     |       |       |       |       |      |      |                           |                           | SOMGT:/0/1:/0:47,0:..47 G    | A |
|       |    |    |     |       |       |       |       |      |      |                           |                           | SOMGT:/0/1:/0:76,0:..77 C    | T |
|       |    |    |     | 0.0   | 0.963 | 1.0,D | 1,D   | 5.4  | 3.69 |                           |                           | SOMGT:/0/1:/0:105,0:..1 C    | T |
|       |    |    |     |       |       |       |       |      |      |                           |                           | SOMGT:/0/1:/0:18,0:..18 G    | A |
|       |    |    | ##  | 0     | 0.0   | 0.594 | 0.987 | 1.00 | 5.8  | 5.62                      |                           | SOMGT:/0/1:/0:50,0:..50 C    | T |
|       |    |    |     |       |       |       |       |      |      |                           |                           | SOMGT:/0/1:/0:44,0:..44 C    | T |
|       |    |    |     | 0.0   | 0.568 | 0.899 | 1.00  | 2.6  | 2.10 |                           |                           | SOMGT:/0/1:/0:90,0:..90 G    | C |
|       |    |    | ##  | 0     | 0.002 | 0.001 | 1,N   |      |      |                           |                           | SOMGT:/0/1:/0:247,0:..2 C    | T |
| 0.001 | 0  | 0  | 0   |       |       |       |       |      |      |                           |                           | SOMGT:/0/1:/0:178,0:..1 G    | A |
|       |    |    |     |       |       |       |       | 3    |      |                           |                           | SOMGT:/0/1:/0:202,0:..2 G    | A |
| 4E-04 |    | 0  | 0   |       |       |       |       |      |      |                           |                           | SOMGT:/0/1:/0:199,0:..1 C    | T |
|       |    |    |     |       |       |       |       |      |      | 0                         |                           | SOMGT:/0/1:/0:25,0:..25 C    | T |

|       |    |    |    |     |       |       |       |      |       |                            |                            |     |      |                         |   |
|-------|----|----|----|-----|-------|-------|-------|------|-------|----------------------------|----------------------------|-----|------|-------------------------|---|
| 2E-04 | .  | .  | .  | .   | .     | .     | .     | 2.32 | .     | SOMGT:/0/1:0:32,0::32 G    | A                          |     |      |                         |   |
|       | 0  | 0  | .  | .   | .     | .     | .     | 0    | 0     | SOMGT:/0/1:0:14,0::14 C    | T                          |     |      |                         |   |
|       | .  | .  | .  | .   | .     | .     | .     | .    | .     | SOMGT:/0/1:0:22,0::23 G    | C                          |     |      |                         |   |
|       | .  | .  | .  | .   | .     | .     | .     | 2.8  | .     | SOMGT:/0/1:0:24,0::24 C    | G                          |     |      |                         |   |
|       | .  | .  | .  | .   | .     | .     | .     | .    | .     | SOMGT:/0/1:0:13,0::13 G    | A                          |     |      |                         |   |
|       | .  | .  | .  | 0.0 | 0.998 | 0.999 | 1.00  | 3.1  | 3.49  | SOMGT:/0/1:0:57,0::57 G    | T                          |     |      |                         |   |
|       | .  | .  | .  | 0.0 | 0.112 | 0.43  | 1,1,N | .    | .     | SOMGT:/0/1:0:65,0::65 C    | T                          |     |      |                         |   |
|       | .  | .  | .  | .   | .     | .     | .     | .    | .     | SOMGT:/0/1:0:32,0::32 C    | T                          |     |      |                         |   |
|       | .  | .  | .  | .   | .     | .     | 1,D   | 4    | 6.43  | SOMGT:/0/1:0:37,0::37 C    | G                          |     |      |                         |   |
|       | .  | .  | .  | .   | .     | .     | .     | 1.59 | 0     | SOMGT:/0/1:0:62,0::62 G    | A                          |     |      |                         |   |
|       | .  | .  | .  | .   | .     | .     | .     | .    | .     | SOMGT:/0/1:0:76,0::76 G    | C                          |     |      |                         |   |
|       | .  | .  | .  | .   | .     | .     | .     | .    | .     | SOMGT:/0/1:0:118,0::1 C    | G                          |     |      |                         |   |
|       | .  | .  | .  | .   | .     | .     | .     | .    | .     | SOMGT:/0/1:0:48,0::48 G    | C                          |     |      |                         |   |
|       | .  | .  | .  | .   | .     | .     | .     | 5.9  | .     | SOMGT:/0/1:0:11,0::11 G    | A                          |     |      |                         |   |
|       | ## | ## | 0  | 0.4 | 0.002 | 0.005 | 0.98  | 1.70 | 0     | 0                          | SOMGT:/0/1:0:44,0::44 G    | A   |      |                         |   |
|       | .  | .  | .  | .   | .     | .     | .     | .    | .     | SOMGT:/0/1:0:17,0::17 G    | C                          |     |      |                         |   |
|       | .  | .  | .  | .   | .     | .     | .     | .    | .     | SOMGT:/0/1:0:8,0::8:0.T    | C                          |     |      |                         |   |
|       | .  | .  | .  | .   | .     | .     | .     | .    | 0     | 0                          | DB;SOMGT:/0/1:0:28,0::27 T | C   |      |                         |   |
|       | .  | .  | .  | .   | .     | .     | 1,A   | 5.5  | 10.7  | SOMGT:/0/1:0:27,0::27 C    | G                          |     |      |                         |   |
|       | .  | .  | .  | .   | .     | .     | .     | .    | .     | DB;SOMGT:/0/1:0:20,0::20 G | C                          |     |      |                         |   |
|       | .  | .  | .  | 0.3 | 0.107 | 0.487 | 1,N   | 2.74 | .     | SOMGT:/0/1:0:157,0::1 C    | T                          |     |      |                         |   |
|       | .  | .  | .  | .   | .     | .     | .     | 4.4  | .     | SOMGT:/0/1:0:24,0::24 C    | A                          |     |      |                         |   |
|       | .  | .  | 0  | 0   | 0.0   | 0.935 | 0.371 | 1.00 | 3.5   | 2.43                       | SOMGT:/0/1:0:42,0::42 G    | A   |      |                         |   |
|       | .  | .  | .  | .   | .     | .     | .     | 0.0  | 0.795 | 0.995                      | 0.97                       | 2.7 | 2.50 | SOMGT:/0/1:0:16,0::16 G | A |
|       | .  | .  | .  | .   | .     | .     | .     | .    | .     | .                          | .                          | .   | .    | SOMGT:/0/1:0:9,0::9:0.T | A |
|       | .  | .  | .  | 0.3 | 0.906 | 0.999 | 1,D   | 4.9  | 4.26  | SOMGT:/0/1:0:34,0::34 G    | A                          |     |      |                         |   |
|       | .  | .  | .  | 0.0 | 0.058 | 0.07  | 1,1,N | .    | .     | SOMGT:/0/1:0:157,0::1 G    | C                          |     |      |                         |   |
|       | .  | .  | .  | .   | .     | .     | .     | .    | 0     | SOMGT:/0/1:0:10,0::10 T    | A                          |     |      |                         |   |
|       | .  | .  | .  | .   | .     | .     | .     | .    | .     | SOMGT:/0/1:0:15,0::15 T    | A                          |     |      |                         |   |
|       | .  | .  | .  | .   | .     | .     | .     | .    | .     | SOMGT:/0/1:0:16,0::16 G    | C                          |     |      |                         |   |
|       | .  | .  | .  | .   | .     | .     | .     | .    | .     | SOMGT:/0/1:0:52,0::52 C    | T                          |     |      |                         |   |
|       | .  | .  | .  | .   | .     | .     | .     | .    | .     | SOMGT:/0/1:0:45,0::45 T    | C                          |     |      |                         |   |
|       | .  | 0  | 0  | .   | .     | .     | .     | .    | 0     | 0                          | DB;SOMGT:/0/1:0:37,1::35 T | C   |      |                         |   |
|       | .  | .  | .  | 1.0 | 0.059 | 0.048 | 1,D   | 4.9  | .     | SOMGT:/0/1:0:48,0::48 C    | A                          |     |      |                         |   |
|       | .  | .  | .  | .   | .     | .     | .     | .    | .     | SOMGT:/0/1:0:93,0::93 C    | T                          |     |      |                         |   |
|       | .  | .  | .  | 0.4 | 0.016 | 0.007 | 0.98  | 4.1  | 1.44  | SOMGT:/0/1:0:31,0::31 G    | A                          |     |      |                         |   |
|       | .  | .  | .  | .   | .     | .     | .     | 1.47 | 0     | 0.1                        | SOMGT:/0/1:0:9,0::9:0.T    | C   |      |                         |   |
|       | .  | .  | .  | .   | .     | .     | .     | .    | 0.2   | 0.2                        | SOMGT:/0/1:0:13,0::13 G    | T   |      |                         |   |
|       | .  | .  | .  | .   | .     | .     | .     | 1.67 | .     | SOMGT:/0/1:0:49,0::49 T    | A                          |     |      |                         |   |
|       | .  | .  | .  | 0.5 | 0.003 | 0.001 | 1,N   | .    | .     | SOMGT:/0/1:0:72,0::74 G    | A                          |     |      |                         |   |
|       | .  | .  | .  | .   | .     | .     | .     | 3.3  | .     | SOMGT:/0/1:0:185,1::1.C    | G                          |     |      |                         |   |
|       | ## | ## | 0  | .   | .     | .     | .     | .    | .     | SOMGT:/0/1:0:85,0::85 C    | T                          |     |      |                         |   |
| 0.007 | .  | 0  | 0  | .   | .     | .     | .     | .    | 0     | 0                          | SOMGT:/0/1:0:61,0::61 T    | A   |      |                         |   |
|       | .  | .  | .  | .   | .     | .     | .     | .    | .     | SOMGT:/0/1:0:27,0::27 C    | T                          |     |      |                         |   |
|       | .  | 0  | ## | 0   | .     | .     | .     | .    | .     | SOMGT:/0/1:0:127,0::1.C    | T                          |     |      |                         |   |
|       | .  | 0  | 0  | .   | .     | .     | .     | .    | 0     | .                          | SOMGT:/0/1:0:105,0::1 G    | A   |      |                         |   |
| 0.102 | .  | .  | .  | .   | .     | .     | .     | .    | 0     | 0.1                        | SOMGT:/0/1:0:9,0::9:0.C    | T   |      |                         |   |
|       | .  | .  | .  | .   | .     | .     | .     | .    | .     | SOMGT:/0/1:0:22,0::22 G    | T                          |     |      |                         |   |
|       | .  | .  | .  | .   | .     | .     | .     | 4.8  | .     | SOMGT:/0/1:0:40,0::40 C    | T                          |     |      |                         |   |
|       | ## | ## | 0  | 0.4 | 0.001 | 0.002 | 1,N   | 2    | 1.66  | SOMGT:/0/1:0:64,0::64 C    | T                          |     |      |                         |   |
| 0.014 | .  | .  | .  | .   | .     | .     | .     | .    | 0     | 0                          | DB;SOMGT:/0/1:0:72,0::72 C | T   |      |                         |   |
|       | .  | .  | .  | .   | .     | .     | .     | .    | 0.4   | 0.5                        | DB;SOMGT:/0/1:0:52,1::48 C | G   |      |                         |   |
|       | .  | .  | .  | .   | .     | .     | .     | .    | 0.4   | 0.4                        | DB;SOMGT:/0/1:0:40,1::37 G | T   |      |                         |   |
|       | .  | ## | 0  | .   | .     | .     | .     | .    | .     | SOMGT:/0/1:0:127,0::1.C    | T                          |     |      |                         |   |

|         |       |                       |            |         |                            |   |
|---------|-------|-----------------------|------------|---------|----------------------------|---|
|         | ##    | 0 0.0 0.3910.84, 1,D  | 2.7 2.81 . |         | SOM GT:/0/1:/0:68,0:..68 G | A |
|         |       |                       |            |         | SOM GT:/0/1:/0:337,0:..3 C | T |
|         |       |                       |            |         | DB;GT:/0/1:/0:33,0:..33 C  | T |
|         |       |                       |            |         | SOM GT:/0/1:/0:24,0:..24 G | T |
|         |       |                       |            |         | SOM GT:/0/1:/0:74,0:..74 T | A |
|         | ##    | 0 .                   |            |         | SOM GT:/0/1:/0:46,0:..46 C | T |
|         |       | 0.0,0.14, 0.557 .     | 1.91 .     |         | SOM GT:/0/1:/0:44,0:..44 G | A |
|         |       | 1.0,0.0040.0,B 1.00   | 4 .        |         | SOM GT:/0/1:/0:23,0:..23 C | A |
|         |       |                       |            |         | SOM GT:/0/1:/0:23,0:..20 T | C |
|         | ##    | 0 .                   |            |         | SOM GT:/0/1:/0:31,0:..31 C | T |
|         |       |                       |            |         | SOM GT:/0/1:/0:21,0:..21 G | T |
|         | ##    | 0 0.4 0.2940.866 0.99 | 4.5 2.15 . |         | SOM GT:/0/1:/0:81,0:..82 G | A |
|         |       |                       | 3.9 2.86 . |         | SOM GT:/0/1:/0:24,0:..24 T | A |
|         | ##    | 0 .                   |            |         | SOM GT:/0/1:/0:27,0:..27 G | A |
| 0.002 . |       |                       |            | 0 .     | SOM GT:/0/1:/0:25,0:..25 C | T |
| 0.327 . |       |                       |            | 0 .     | DB;GT:/0/1:/0:19,0:..19 T  | A |
|         |       |                       |            |         | SOM GT:/0/1:/0:32,0:..32 G | A |
|         |       |                       |            |         | SOM GT:/0/1:/0:63,0:..63 C | T |
|         | ##    | 0 .                   |            |         | SOM GT:/0/1:/0:68,1:..69 A | G |
|         |       |                       | 1.46 .     |         | SOM GT:/0/1:/0:113,0:..1 G | A |
|         |       | 0.0 0.6370.887 1,D    | 5.8 4.15 . |         | DB;GT:/0/1:/0:46,0:..46 A  | G |
|         |       | 0.0 0.994 1.0,D 1,D   | 4 4.84 .   |         | SOM GT:/0/1:/0:107,0:..1 G | A |
| 2E-04 . | ##    | 0 .                   |            | 0 .     | SOM GT:/0/1:/0:38,0:..38 G | A |
|         |       |                       | 1.62 .     |         | SOM GT:/0/1:/0:101,0:..1 A | G |
|         |       |                       | 2.4 .      |         | SOM GT:/0/1:/0:51,0:..51 T | C |
|         |       | 0.2 1.0,D 1.0,D 1,D   | 4.8 3.46 . |         | SOM GT:/0/1:/0:55,0:..56 T | C |
|         |       |                       |            |         | SOM GT:/0/1:/0:44,0:..44 G | A |
|         |       |                       |            |         | SOM GT:/0/1:/0:19,0:..19 C | T |
|         |       |                       |            | 0 .     | SOM GT:/0/1:/0:21,0:..21 A | G |
|         |       |                       | 1.45 .     |         | SOM GT:/0/1:/0:123,0:..1 G | T |
|         |       |                       | 5.7 4.01 . |         | SOM GT:/0/1:/0:37,0:..37 C | A |
| 2E-04 . | ##    | 0 .                   |            |         | SOM GT:/0/1:/0:22,0:..22 G | A |
|         |       |                       |            |         | SOM GT:/0/1:/0:45,0:..45 G | A |
|         |       | 0.0,1.0,D 1.0,D 1,D   | 5 4.65 .   |         | SOM GT:/0/1:/0:23,0:..23 G | A |
|         |       | 0.0,0.945 0.994 1.00  | 5.1 4.41 . |         | SOM GT:/0/1:/0:66,0:..66 C | A |
|         |       |                       |            | 0 0     | SOM GT:/0/1:/0:9,0:..9 G   | T |
|         |       |                       |            | 0 .     | SOM GT:/0/1:/0:17,0:..15 G | A |
|         |       | 0.1 0.039 0.104 1.00  | 3.8 .      |         | SOM GT:/0/1:/0:48,0:..48 T | C |
|         |       | 0.7 0.003 0.0,B 0.99  | 2.5 .      |         | SOM GT:/0/1:/0:26,0:..26 C | A |
|         |       |                       |            |         | SOM GT:/0/1:/0:196,0:..1 C | T |
|         |       |                       | 4.1 1.54 . |         | SOM GT:/0/1:/0:82,1:..83 A | T |
|         |       |                       |            | 0 0     | SOM GT:/0/1:/0:15,0:..12 G | C |
|         | 0 0 . |                       |            |         | SOM GT:/0/1:/0:24,0:..24 G | A |
|         |       |                       |            |         | SOM GT:/0/1:/0:27,0:..27 C | A |
|         | ##    | 0 .                   |            |         | SOM GT:/0/1:/0:25,0:..26 G | A |
|         |       |                       |            |         | SOM GT:/0/1:/0:46,0:..46 C | A |
|         |       |                       |            |         | SOM GT:/0/1:/0:74,0:..74 T | C |
|         |       | 0.0 0.66, 0.955 0.75  | 4.4 3.62 . |         | SOM GT:/0/1:/0:13,0:..13 C | T |
|         |       |                       |            | 0 .     | SOM GT:/0/1:/0:8,0:..8 C   | A |
|         | ## ## | 0 .                   |            |         | SOM GT:/0/1:/0:9,0:..9 C   | T |
|         |       |                       |            |         | SOM GT:/0/1:/0:120,0:..1 C | T |
| 0.002 . | 0 0 . |                       |            |         | SOM GT:/0/1:/0:26,0:..26 T | A |
|         |       |                       |            | 0.2 0.2 | DB;GT:/0/1:/0:38,0:..37 C  | A |
|         |       |                       |            |         | SOM GT:/0/1:/0:45,0:..45 G | C |

|       |  |     |       |       |       |                          |                            |      |      |                              |                           |   |
|-------|--|-----|-------|-------|-------|--------------------------|----------------------------|------|------|------------------------------|---------------------------|---|
|       |  |     |       | 2.11  |       | SOMGT:/0/1:0:36,0::36 G  | A                          |      |      |                              |                           |   |
|       |  |     |       | 0.1   | 0.2   | SOMGT:/0/1:0:19,0::19 C  | T                          |      |      |                              |                           |   |
|       |  |     |       | 0.1   | 0.2   | SOMGT:/0/1:0:16,0::16 G  | A                          |      |      |                              |                           |   |
|       |  | 0.2 | 0.008 | 0.014 | 1,N   | SOMGT:/0/1:0:57,0::57 G  | A                          |      |      |                              |                           |   |
|       |  |     |       | 1,A   | 4.71  | SOMGT:/0/1:0:98,0::98 G  | T                          |      |      |                              |                           |   |
|       |  |     |       |       |       | SOMGT:/0/1:0:9,0::9:0: G | A                          |      |      |                              |                           |   |
|       |  |     |       |       |       | SOMGT:/0/1:0:8,0::8:0: G | A                          |      |      |                              |                           |   |
|       |  |     |       |       | 0     | 0.1                      | SOMGT:/0/1:0:9,0::8:0: T   | A    |      |                              |                           |   |
|       |  |     |       | 3.3   |       | SOMGT:/0/1:0:24,0::24 C  | A                          |      |      |                              |                           |   |
|       |  |     |       |       | 0     | 0.1                      | SOMGT:/0/1:0:72,1::70 C    | G    |      |                              |                           |   |
|       |  |     |       |       |       | SOMGT:/0/1:0:13,0::13 T  | C                          |      |      |                              |                           |   |
|       |  |     |       |       |       | SOMGT:/0/1:0:31,0::31 C  | A                          |      |      |                              |                           |   |
|       |  |     |       |       | 0     | 0                        | SOMGT:/0/1:0:14,0::9:0 G   | C    |      |                              |                           |   |
|       |  |     |       |       | 0     | 0                        | SOMGT:/0/1:0:8,0::8:0: G   | A    |      |                              |                           |   |
|       |  |     |       | 5.1   | 4.13  | SOMGT:/0/1:0:15,0::15 A  | T                          |      |      |                              |                           |   |
|       |  |     |       | 1.24  | 0     | 0.1                      | SOMGT:/0/1:0:21,0::14 T    | C    |      |                              |                           |   |
|       |  |     |       |       | 0     |                          | SOMGT:/0/1:0:12,0::13 T    | A    |      |                              |                           |   |
|       |  |     |       |       | 0.1   | 0                        | SOMGT:/0/1:0:11,0::9:0 T   | G    |      |                              |                           |   |
|       |  |     |       |       |       |                          | SOMGT:/0/1:0:9,0::9:0: T   | C    |      |                              |                           |   |
|       |  |     |       |       | 0.1   | 0.3                      | DB;SOMGT:/0/1:0:35,1::34 G | A    |      |                              |                           |   |
|       |  |     |       |       | 0     |                          | SOMGT:/0/1:0:17,0::17 C    | A    |      |                              |                           |   |
|       |  | 0   | 0     |       | 0     |                          | DB;SOMGT:/0/1:0:45,1::46 G | A    |      |                              |                           |   |
|       |  |     |       |       |       |                          | SOMGT:/0/1:0:20,0::20 A    | C    |      |                              |                           |   |
|       |  | 0   | 0     | 0.851 | 0.997 | 1,N                      | DB;SOMGT:/0/1:0:35,0::38 G | A    |      |                              |                           |   |
|       |  |     |       |       |       |                          | SOMGT:/0/1:0:9,0::9:0: G   | T    |      |                              |                           |   |
|       |  |     |       |       |       | 0                        | SOMGT:/0/1:0:9,0::9:0: G   | A    |      |                              |                           |   |
|       |  |     |       |       |       |                          | SOMGT:/0:12 0/1:26,5:31A   | C    |      |                              |                           |   |
|       |  |     |       |       | 0     | 0.1                      | SOMGT:/0:36 0/1:51,6:28 G  | T    |      |                              |                           |   |
| 0.398 |  |     |       |       | 0     | 0.2                      | SOMGT:/0:35 0/1:53,6:30 C  | T    |      |                              |                           |   |
|       |  |     |       |       | 0     | 0                        | SOMGT:/0:14 0/1:14,4:37 G  | A    |      |                              |                           |   |
|       |  |     |       |       | 3.1   |                          | SOMGT:/0:12 0/1:23,4:34 G  | T    |      |                              |                           |   |
|       |  |     |       |       | 0     | 0                        | SOMGT:/0:15 0/1:11,6:37 T  | C    |      |                              |                           |   |
|       |  |     |       |       | 0     |                          | SOMGT:/0:17 0/1:26,14:3 G  | T    |      |                              |                           |   |
|       |  | 0   | 0     | 0.0   | 0.647 | 0.998                    | 1,D                        | 3.26 | 0    | 0.1                          | SOMGT:/0:22 0/1:44,4:37 G | C |
|       |  |     |       |       |       |                          |                            | 0.2  | 0.3  | SOMGT:/0:12 0/1:12,4:30 A    | C                         |   |
|       |  |     |       |       |       |                          |                            | 0.1  | 0.2  | DB;SOMGT:/0:32 0/1:74,9:35 C | A                         |   |
|       |  |     |       |       |       |                          |                            | 0    |      | SOMGT:/0:33 0/1:30,13:3 A    | G                         |   |
|       |  |     |       |       |       |                          |                            | 0    |      | SOMGT:/0:8,(0/1:22,5:13 G    | C                         |   |
|       |  | 0   | 0     | 0.1   | 0.016 | 0.239                    | 1,N                        | 0.1  | 0.1  | SOMGT:/0:10 0/1:27,4:37 C    | T                         |   |
|       |  |     |       |       |       |                          |                            | 0    | 0.1  | SOMGT:/0:19 0/1:23,5:37 C    | G                         |   |
|       |  |     |       |       |       |                          |                            | 0    |      | SOMGT:/0:8,(0/1:11,5:11A     | T                         |   |
|       |  |     |       |       |       |                          |                            | 0    |      | DB;SOMGT:/0:23 0/1:36,8:30 C | A                         |   |
|       |  | 0   | 0     |       |       |                          |                            | 1.95 |      | SOMGT:/0:42 0/1:42,6:35 G    | A                         |   |
|       |  |     |       |       |       |                          |                            | 0.1  | 0    | SOMGT:/0:37 0/1:74,11:3 G    | A                         |   |
|       |  |     |       |       |       |                          |                            | 0.2  | 0    | SOMGT:/0:36 0/1:59,12:3 A    | G                         |   |
|       |  | 0   | 0     |       |       |                          |                            | 0.1  | 0.4  | DB;SOMGT:/0:26 0/1:33,6:37 A | T                         |   |
| 0.042 |  |     |       |       |       |                          |                            | 0.1  | 0    | SOMGT:/0:14 0/1:28,4:37 G    | C                         |   |
|       |  |     |       |       |       |                          |                            |      |      | SOMGT:/0/1:0:48,0::41 G      | A                         |   |
|       |  |     |       |       |       |                          |                            |      |      | SOMGT:/0/1:0:58,0::58 A      | G                         |   |
|       |  |     |       |       |       |                          |                            | 3.5  |      | SOMGT:/0/1:0:9,0::9:0: C     | A                         |   |
|       |  | 0.0 | 0.993 | 1.0   | D     | 0.99                     | 4.8                        | 3.80 |      | SOMGT:/0/1:0:47,0::47 C      | T                         |   |
|       |  |     |       |       |       |                          |                            | 0    |      | SOMGT:/0/1:0:25,0::25 C      | T                         |   |
|       |  |     |       |       |       |                          |                            | 0    |      | SOMGT:/0/1:0:25,0::25 G      | T                         |   |
|       |  |     |       |       |       |                          |                            | 5.9  | 3.35 | SOMGT:/0/1:0:8,0::8:0: T     | G                         |   |

|       |    |   |   |  |  |      |       |       |                     |                     |      |     |      |  |      |                     |   |   |
|-------|----|---|---|--|--|------|-------|-------|---------------------|---------------------|------|-----|------|--|------|---------------------|---|---|
|       |    |   |   |  |  | 0.1  | 0.2   | DB;S  | GT:/0/1:/0:20,0::20 | T                   | C    |     |      |  |      |                     |   |   |
|       |    |   |   |  |  | 0.1  | 0.3   | SOM   | GT:/0/1:/0:21,0::21 | G                   | A    |     |      |  |      |                     |   |   |
|       |    |   |   |  |  | 0.1  | 0.1   | SOM   | GT:/0/1:/0:18,0::16 | G                   | A    |     |      |  |      |                     |   |   |
|       |    |   |   |  |  |      | 0     | SOM   | GT:/0/1:/0:33,1::26 | T                   | C    |     |      |  |      |                     |   |   |
|       |    |   |   |  |  | 0    | 0     | SOM   | GT:/0/1:/0:38,1::29 | G                   | C    |     |      |  |      |                     |   |   |
|       |    |   |   |  |  | 1.23 | 0.1   | 0.2   | SOM                 | GT:/0/1:/0:17,0::11 | A    | G   |      |  |      |                     |   |   |
|       |    |   |   |  |  |      | 0     | 0.2   | SOM                 | GT:/0/1:/0:12,0::6  | C    | A   |      |  |      |                     |   |   |
|       |    |   |   |  |  | 1.0  | 0.023 | 0.004 | 1.00                | 3.2                 | 1.46 |     |      |  | SOM  | GT:/0/1:/0:34,1::35 | C | G |
|       |    |   |   |  |  |      |       |       |                     |                     |      |     |      |  | SOM  | GT:/0/1:/0:17,0::17 | C | G |
|       |    |   |   |  |  | 0.1  | 0.998 | 0.998 | 1,D                 | 5.8                 | 4.66 |     |      |  | SOM  | GT:/0/1:/0:22,0::23 | C | T |
|       |    |   |   |  |  |      |       |       |                     | 5.4                 |      |     |      |  | SOM  | GT:/0/1:/0:28,0::28 | G | A |
|       |    |   |   |  |  |      |       |       |                     | 0                   | 0    |     |      |  | SOM  | GT:/0/1:/0:22,0::22 | C | T |
|       |    |   |   |  |  |      |       |       |                     |                     |      |     |      |  | SOM  | GT:/0/1:/0:50,1::37 | G | C |
|       |    |   |   |  |  |      |       |       |                     |                     |      |     |      |  | SOM  | GT:/0/1:/0:98,0::98 | G | T |
| 4E-04 | ## | 0 | 0 |  |  |      |       |       |                     | 0                   |      |     |      |  | SOM  | GT:/0/1:/0:28,0::28 | G | A |
|       |    |   |   |  |  | 0.2  | 0.001 | 0.001 | 0.99                | 4.8                 | 1.44 |     |      |  | SOM  | GT:/0/1:/0:136,0::1 | A | C |
|       |    |   |   |  |  | ##   | 0     | 0.0   | 0.07                | 0.298               | 0.92 | 4.9 | 2.12 |  | SOM  | GT:/0/1:/0:215,0::2 | G | A |
|       |    |   |   |  |  | ##   | 0     | 0.2   | 0.001               | 0.001               | 1,N  |     |      |  | SOM  | GT:/0/1:/0:50,0::50 | C | T |
|       |    |   |   |  |  | 0    | 0     |       |                     |                     |      | 2.7 |      |  | DB;S | GT:/0/1:/0:29,0::29 | A | G |
|       |    |   |   |  |  |      |       |       |                     |                     |      |     |      |  | SOM  | GT:/0/1:/0:12,0::12 | C | G |
|       |    |   |   |  |  |      |       |       |                     | 5.6                 | 1.28 |     |      |  | SOM  | GT:/0/1:/0:100,1::1 | G | A |
|       |    |   |   |  |  | 0.4  | 0.848 | 0.991 | 1.00                | 2.5                 | 2.33 |     |      |  | SOM  | GT:/0/1:/0:58,1::59 | G | A |
|       |    |   |   |  |  |      |       |       |                     | 2.8                 |      |     |      |  | SOM  | GT:/0/1:/0:12,0::12 | T | G |
|       |    |   |   |  |  |      |       |       |                     |                     |      |     |      |  | SOM  | GT:/0/1:/0:11,0::11 | C | G |
| 2E-04 |    |   |   |  |  |      |       |       |                     |                     |      |     |      |  | SOM  | GT:/0/1:/0:20,0::20 | T | C |
| 4E-04 | ## | 0 |   |  |  | 0.99 | 1     | 1.0,D | 1,D                 | 5.7                 | 4.68 |     |      |  | SOM  | GT:/0/1:/0:43,1::45 | G | A |
|       |    |   |   |  |  |      |       |       |                     | 0                   | 0    |     |      |  | SOM  | GT:/0/1:/0:8,0::8   | O | A |
| 0.477 |    |   |   |  |  |      |       |       |                     | 0.1                 | 0.4  |     |      |  | SOM  | GT:/0/1:/0:15,0::9  | C | T |
|       |    |   |   |  |  | 1.0  | 0.002 | 0.001 | 1,N                 |                     |      |     |      |  | SOM  | GT:/0/1:/0:11,0::11 | C | T |
|       |    |   |   |  |  |      |       |       |                     |                     |      |     |      |  | SOM  | GT:/0/1:/0:116,0::1 | G | C |
|       |    |   |   |  |  |      |       |       |                     |                     |      |     |      |  | SOM  | GT:/0/1:/0:42,0::42 | G | A |
|       |    |   |   |  |  |      |       |       |                     | 2.48                |      |     |      |  | SOM  | GT:/0/1:/0:132,0::1 | C | T |
|       |    |   |   |  |  |      |       |       |                     |                     |      |     |      |  | SOM  | GT:/0/1:/0:35,0::35 | T | G |
|       |    |   |   |  |  |      |       |       |                     |                     |      |     |      |  | SOM  | GT:/0/1:/0:30,0::30 | C | T |
|       |    |   |   |  |  |      |       |       |                     |                     |      |     |      |  | SOM  | GT:/0/1:/0:46,0::46 | G | A |
|       |    |   |   |  |  |      |       |       |                     | 2.4                 | 1.48 |     |      |  | SOM  | GT:/0/1:/0:68,0::68 | G | A |
|       |    |   |   |  |  | 0.0  | 0.986 | 0.996 | 1.00                |                     |      |     |      |  | SOM  | GT:/0/1:/0:293,1::2 | C | A |
|       |    |   |   |  |  |      |       |       |                     | 3.9                 |      |     |      |  | SOM  | GT:/0/1:/0:48,0::48 | G | C |
|       |    |   |   |  |  |      |       |       |                     |                     |      |     |      |  | SOM  | GT:/0/1:/0:86,1::87 | C | T |
|       |    |   |   |  |  |      |       |       |                     | 2.7                 | 1.88 |     |      |  | SOM  | GT:/0/1:/0:85,0::85 | C | T |
|       |    |   |   |  |  |      |       |       |                     | 5.3                 | 4.40 |     |      |  | SOM  | GT:/0/1:/0:24,0::24 | A | G |
|       |    |   |   |  |  |      |       |       |                     |                     |      |     |      |  | SOM  | GT:/0/1:/0:88,0::75 | A | T |
|       |    |   |   |  |  |      |       |       |                     |                     |      |     |      |  | SOM  | GT:/0/1:/0:108,0::1 | G | T |
|       |    |   |   |  |  |      |       |       |                     |                     |      |     |      |  | SOM  | GT:/0/1:/0:42,0::42 | G | A |
|       |    |   |   |  |  |      |       |       |                     | 0                   | 0    |     |      |  | SOM  | GT:/0/1:/0:18,0::9  | C | T |
|       |    |   |   |  |  |      |       |       |                     | 1.59                |      |     |      |  | SOM  | GT:/0/1:/0:31,0::31 | C | G |
|       |    |   |   |  |  |      |       |       |                     | 0.1                 | 0    |     |      |  | SOM  | GT:/0/1:/0:16,0::16 | G | A |
|       |    |   |   |  |  |      |       |       |                     | 0.1                 | 0    |     |      |  | SOM  | GT:/0/1:/0:13,0::13 | G | A |
|       |    |   |   |  |  | 0.0  | 0.477 | 0.988 | 1.00                |                     | 3.03 |     |      |  | SOM  | GT:/0/1:/0:59,1::60 | G | A |
|       |    |   |   |  |  |      |       |       |                     | 3.7                 |      |     |      |  | SOM  | GT:/0/1:/0:152,1::1 | G | A |
|       |    |   |   |  |  |      |       |       |                     | 1.91                |      |     |      |  | SOM  | GT:/0/1:/0:17,0::17 | G | A |
|       |    |   |   |  |  |      |       |       |                     |                     |      |     |      |  | SOM  | GT:/0/1:/0:10,0::10 | A | G |
|       |    |   |   |  |  |      |       |       |                     |                     |      |     |      |  | SOM  | GT:/0/1:/0:50,0::50 | T | G |
|       |    |   |   |  |  |      |       |       |                     | 2.9                 |      |     |      |  | SOM  | GT:/0/1:/0:39,0::39 | G | C |

|       |    |   |     |       |            |        |               |                            |                         |   |
|-------|----|---|-----|-------|------------|--------|---------------|----------------------------|-------------------------|---|
|       |    |   |     |       | 2.2        |        |               | SOMGT:/0/1:0:40,0::40 C    | G                       |   |
|       |    |   |     |       |            |        |               | SOMGT:/0/1:0:13,0::13 T    | C                       |   |
|       | ## | 0 |     |       |            |        |               | SOMGT:/0/1:0:38,1::39 G    | A                       |   |
| 2E-04 |    |   |     |       |            |        | 0             | SOMGT:/0/1:0:150,0::1 C    | T                       |   |
|       |    |   |     |       |            |        |               | SOMGT:/0/1:0:40,1::41 A    | T                       |   |
|       |    |   |     |       | 1,A        | 6 7.18 |               | SOMGT:/0/1:0:21,0::21 G    | T                       |   |
|       |    |   |     | 0.5   | 0.0010.002 | 1,N    | 2.9           | SOMGT:/0/1:0:83,0::83 C    | T                       |   |
| 8E-04 | 0  | 0 | 0   |       |            |        |               | SOMGT:/0/1:0:86,0::86 G    | A                       |   |
|       |    |   |     |       |            |        |               | SOMGT:/0/1:0:23,0::23 G    | C                       |   |
|       |    |   |     | 0.0   | 0.972      | 1,0,D  | 0.96 5.7 3.84 | SOMGT:/0/1:0:77,1::78 G    | A                       |   |
|       |    |   |     |       |            |        |               | SOMGT:/0/1:0:17,0::17 G    | A                       |   |
|       | ## | 0 |     |       |            |        |               | SOMGT:/0/1:0:126,1::1 C    | T                       |   |
|       | ## | 0 |     |       |            | 2.1    |               | SOMGT:/0/1:0:161,0::1 G    | A                       |   |
|       |    |   |     |       |            |        |               | SOMGT:/0/1:0:18,0::18 C    | G                       |   |
|       |    |   |     |       |            |        |               | SOMGT:/0/1:0:119,1::1 C    | T                       |   |
|       |    |   |     |       |            |        |               | SOMGT:/0/1:0:33,0::33 G    | A                       |   |
|       |    |   |     | 0.0   |            | 1,N    |               | SOMGT:/0/1:0:150,1::1 G    | A                       |   |
|       |    |   |     | 0.9   | 0.019      | 0.053  | 1,N           | 1.98                       | SOMGT:/0/1:0:28,0::28 G | C |
|       |    |   |     |       |            |        |               | SOMGT:/0/1:0:15,0::15 T    | C                       |   |
|       |    |   |     |       |            |        | 0             | DB;SOMGT:/0/1:0:19,0::23 G | T                       |   |
|       |    |   |     |       |            |        |               | SOMGT:/0/1:0:102,1::1 G    | T                       |   |
|       |    |   |     |       |            |        |               | SOMGT:/0/1:0:56,0::56 G    | A                       |   |
|       |    |   |     |       |            |        |               | SOMGT:/0/1:0:30,0::30 G    | A                       |   |
|       | ## | 0 |     |       |            |        |               | SOMGT:/0/1:0:13,0::13 G    | A                       |   |
|       |    |   |     | 0.0   | 0.999      | 0.999  | 1,D           | 4.7 4.37                   | SOMGT:/0/1:0:42,0::42 G | A |
|       |    |   |     |       |            |        |               | SOMGT:/0/1:0:57,1::58 A    | T                       |   |
|       |    |   |     |       |            |        |               | SOMGT:/0/1:0:20,0::20 A    | T                       |   |
| 2E-04 | ## | 0 |     |       |            | 1,A    | 4.1 26.1      | SOMGT:/0/1:0:15,0::15 G    | A                       |   |
|       |    |   |     |       |            |        | 0 0           | SOMGT:/0/1:0:34,1::27 G    | T                       |   |
|       |    |   |     | 0.1   | 0.817      | 0.975  | 1,D           | 5.5 5.27                   | SOMGT:/0/1:0:24,0::24 C | T |
|       |    |   |     |       |            |        | 1.25          | SOMGT:/0/1:0:65,0::65 C    | T                       |   |
|       |    |   |     |       |            |        |               | SOMGT:/0/1:0:17,0::17 C    | G                       |   |
|       | ## | 0 | 1.0 | 0.006 | 0.015      | 1,D    | 3.8           | SOMGT:/0/1:0:39,0::39 C    | T                       |   |
|       |    |   |     |       |            |        | 1.47          | SOMGT:/0/1:0:22,0::22 G    | A                       |   |
|       |    |   |     |       |            |        | 0.1 0         | DB;SOMGT:/0/1:0:41,0::41 A | G                       |   |
|       |    |   |     |       |            |        |               | SOMGT:/0/1:0:10,0::10 C    | G                       |   |
|       |    |   |     |       |            |        |               | SOMGT:/0/1:0:11,0::11 C    | T                       |   |
|       |    |   |     |       |            |        |               | SOMGT:/0/1:0:8,0::9 C      | T                       |   |
|       |    |   |     |       |            |        |               | SOMGT:/0/1:0:91,0::91 C    | T                       |   |
|       |    |   |     | 0.0   | 0.548      | 0.948  | 1,N           | 4.3 2.60                   | SOMGT:/0/1:0:14,0::14 C | A |
|       |    |   |     |       |            |        | 1,D           | 4.2 3.22                   | SOMGT:/0/1:0:119,0::1 G | A |
|       |    |   |     |       |            |        |               | SOMGT:/0/1:0:31,0::31 G    | A                       |   |
|       | ## | 0 | 0.0 | 0.083 | 0.507      | 1.00   | 3.78          | SOMGT:/0/1:0:47,0::47 G    | A                       |   |
|       |    |   |     |       |            |        |               | SOMGT:/0/1:0:63,0::63 G    | C                       |   |
|       |    |   |     | 0.1   | 0.0        | 0.0    | B 0,B 1,N     |                            | SOMGT:/0/1:0:46,0::46 G | A |
|       |    |   |     | 0.7   | 0.002      | 0.0    | B 0.71        | 4.8                        | SOMGT:/0/1:0:243,1::2 G | A |
|       |    |   |     |       |            |        | 3             | SOMGT:/0/1:0:434,0::4 C    | A                       |   |
|       |    |   |     |       |            |        | 0             | DB;SOMGT:/0/1:0:19,0::14 C | T                       |   |
|       |    |   |     |       |            |        | 0 0           | DB;SOMGT:/0/1:0:22,0::20 T | A                       |   |
|       |    |   |     |       |            |        | 0.1 0         | DB;SOMGT:/0/1:0:35,1::34 T | G                       |   |
|       |    |   |     |       |            |        | 0             | DB;SOMGT:/0/1:0:36,1::34 T | G                       |   |
|       |    |   |     |       |            |        |               | SOMGT:/0/1:0:20,0::20 C    | A                       |   |
|       |    |   |     | 0.4   | 0.002      | 0.001  | 1,N           |                            | SOMGT:/0/1:0:228,1::2 T | C |
|       |    |   |     |       |            |        |               | SOMGT:/0/1:0:139,0::1 G    | C                       |   |



|       |    |     |      |  |       |         |        |       |      |                          |                          |                          |                          |   |
|-------|----|-----|------|--|-------|---------|--------|-------|------|--------------------------|--------------------------|--------------------------|--------------------------|---|
|       |    | 0.8 | 0.05 |  | 0.04  | 1,D     | 5.8    | 1.77  |      | SOMGT:/0/1:0:25,0:..25 C | G                        |                          |                          |   |
|       |    |     |      |  |       |         |        |       |      | SOMGT:/0/1:0:40,0:..40 G | A                        |                          |                          |   |
|       | ## | ##  | 0.0  |  | 0.42  | 0.80    | 1,D    | 2.66  |      | SOMGT:/0/1:0:201,1:..2 G | T                        |                          |                          |   |
|       |    |     |      |  |       |         | 2.9    |       |      | SOMGT:/0/1:0:15,0:..15 C | G                        |                          |                          |   |
|       |    |     |      |  |       |         |        |       |      | SOMGT:/0/1:0:9,0:..9:0:A | T                        |                          |                          |   |
|       |    |     | 0.0  |  | 0.04  | 0.02    | 1,D    | 5.3   | 4.86 | SOMGT:/0/1:0:171,1:..1 C | T                        |                          |                          |   |
|       | ## | ##  | 0    |  |       |         | 1.52   | 0     |      | SOMGT:/0/1:0:158,0:..1 C | T                        |                          |                          |   |
|       |    |     |      |  |       |         | 1.30   |       |      | SOMGT:/0/1:0:11,0:..11 G | A                        |                          |                          |   |
|       |    |     | 1.0  |  | 0.08  |         | 0.35   | 1,D   | 5.9  | 2.88                     | SOMGT:/0/1:0:29,0:..29 G | A                        |                          |   |
|       |    |     |      |  |       |         |        |       |      | SOMGT:/0/1:0:66,1:..67 C | T                        |                          |                          |   |
|       |    |     |      |  |       |         |        |       |      | SOMGT:/0/1:0:24,0:..24 G | C                        |                          |                          |   |
|       | ## | 0   | 0.1  |  | 0.0   |         | 0.0    | B     | 1,N  | SOMGT:/0/1:0:30,0:..31 C | T                        |                          |                          |   |
|       |    |     | 0.0  |  | 0.04  | 0.66    | 1,0.97 | 4.4   | 2.60 | SOMGT:/0/1:0:184,0:..1 G | A                        |                          |                          |   |
|       |    |     | 0.0  |  | 0.77  | 0.99    | 1,N    | 3.3   | 2.81 | SOMGT:/0/1:0:49,0:..49 C | T                        |                          |                          |   |
|       |    |     |      |  |       |         |        |       |      | SOMGT:/0/1:0:8,0:..8:0 G | T                        |                          |                          |   |
|       |    |     |      |  |       |         |        |       |      | SOMGT:/0/1:0:9,0:..9:0 T | G                        |                          |                          |   |
|       |    |     |      |  |       |         | 0.1    | 0.4   |      | SOMGT:/0/1:0:26,0:..18 C | A                        |                          |                          |   |
|       |    |     |      |  |       |         | 0      | 0.1   |      | SOMGT:/0/1:0:24,0:..16 C | T                        |                          |                          |   |
|       |    |     |      |  |       |         |        |       |      | SOMGT:/0/1:0:86,1:..88 C | T                        |                          |                          |   |
|       |    |     |      |  |       |         |        |       |      | SOMGT:/0/1:0:22,0:..22 C | G                        |                          |                          |   |
|       | 0  | 0   |      |  |       |         |        |       |      | SOMGT:/0/1:0:55,0:..52 T | G                        |                          |                          |   |
|       |    |     |      |  |       |         |        |       |      | SOMGT:/0/1:0:83,0:..83 G | T                        |                          |                          |   |
|       |    |     |      |  |       |         | 0.1    | 0.1   |      | SOMGT:/0/1:0:33,1:..33 G | C                        |                          |                          |   |
|       | 0  | 0   | 0.6  |  | 0.002 | 0.014   | 0.64   | 4.5   |      | SOMGT:/0/1:0:41,0:..41 G | A                        |                          |                          |   |
|       |    |     |      |  |       |         |        |       |      | SOMGT:/0/1:0:178,1:..1 T | A                        |                          |                          |   |
| 0.144 | 0  | 0   |      |  |       |         | 0.1    | 0.1   |      | SOMGT:/0/1:0:8,0:..8:0 A | G                        |                          |                          |   |
|       |    |     |      |  |       |         |        |       |      | SOMGT:/0/1:0:31,0:..31 C | T                        |                          |                          |   |
|       |    |     |      |  |       |         | 0      |       |      | SOMGT:/0/1:0:14,0:..14 A | G                        |                          |                          |   |
|       |    |     | 0.0  |  | 0.73  | 0.98    | 1,D    | 5.7   | 4.01 | SOMGT:/0/1:0:58,0:..58 G | A                        |                          |                          |   |
|       |    |     |      |  |       |         | 0      | 0     |      | SOMGT:/0/1:0:26,0:..26 T | C                        |                          |                          |   |
|       |    |     | 0.0  |  | 0.91  | 0.99    | 1,D    | 4.6   | 1.92 | SOMGT:/0/1:0:93,0:..93 C | A                        |                          |                          |   |
|       |    |     | 0.0  |  | 0.93  | 0.99    | 1,D    | 5.4   | 4.16 | SOMGT:/0/1:0:15,0:..15 A | G                        |                          |                          |   |
|       |    |     |      |  |       |         | 0      | 0     |      | SOMGT:/0/1:0:21,0:..21 T | C                        |                          |                          |   |
|       |    |     |      |  |       |         | 0      | 0.1   |      | SOMGT:/0/1:0:17,0:..17 C | G                        |                          |                          |   |
|       | 0  | 0   |      |  |       |         | 0      | 0.1   | DB;  | SOMGT:/0/1:0:60,1:..60 T | G                        |                          |                          |   |
|       | 0  | 0   |      |  |       |         | 1.48   |       |      | SOMGT:/0/1:0:51,0:..38 C | G                        |                          |                          |   |
|       |    |     |      |  |       |         | 0      | 0     |      | SOMGT:/0/1:0:26,0:..21 T | A                        |                          |                          |   |
|       |    |     |      |  |       |         |        |       |      | SOMGT:/0/1:0:47,0:..47 C | T                        |                          |                          |   |
|       |    |     |      |  |       |         | 0      |       |      | SOMGT:/0/1:0:44,0:..44 C | T                        |                          |                          |   |
|       |    |     |      |  |       |         |        |       |      | SOMGT:/0/1:0:17,0:..17 C | G                        |                          |                          |   |
|       | ## | ##  | 0    |  | 0.4   |         | 0.005  | 0.002 | 1,N  | SOMGT:/0/1:0:87,0:..88 T | C                        |                          |                          |   |
|       |    |     | 0.0  |  | 0.99  | 0.99    | 0.98   | 5.5   | 4.27 | SOMGT:/0/1:0:42,0:..42 C | A                        |                          |                          |   |
|       | ## | 0   | 0.0  |  | 0.98  |         | 1.0    | D     | 0.98 | 5.6                      | 5.56                     | SOMGT:/0/1:0:80,0:..80 C | T                        |   |
|       |    |     |      |  |       |         |        |       |      | SOMGT:/0/1:0:39,0:..39 G | T                        |                          |                          |   |
|       |    |     | 0.0  |  | 0.03  | 1,0.034 | 1,D    | 5.3   | 3.35 | SOMGT:/0/1:0:168,0:..1 T | C                        |                          |                          |   |
|       |    |     |      |  |       |         | 0.1    | 0.1   |      | SOMGT:/0/1:0:42,1:..38 A | G                        |                          |                          |   |
|       |    |     |      |  |       |         |        |       |      | SOMGT:/0/1:0:13,0:..13 C | G                        |                          |                          |   |
|       | 0  | 0   | 0.1  |  | 0.02  |         | 0.10   | 0.88  | 4.6  | 3.30                     | 0                        | 0                        | SOMGT:/0/1:0:10,0:..10 C | T |
|       |    |     |      |  |       |         |        |       |      | SOMGT:/0/1:0:22,0:..22 C | G                        |                          |                          |   |
|       |    |     |      |  |       |         |        |       |      | SOMGT:/0/1:0:10,0:..10 G | A                        |                          |                          |   |
|       |    |     | 0.0  |  | 0.58  |         | 0.89   | 0.99  | 4.8  | 2.62                     |                          |                          | SOMGT:/0/1:0:191,0:..1 C | A |
|       |    |     |      |  |       |         |        |       |      | SOMGT:/0/1:0:15,0:..15 G | T                        |                          |                          |   |
|       | 0  | ##  | 0    |  |       |         | 3.4    |       |      | SOMGT:/0/1:0:48,0:..48 G | A                        |                          |                          |   |
|       |    |     |      |  |       |         |        |       |      | SOMGT:/0/1:0:38,0:..39 T | C                        |                          |                          |   |

|  |  |  |  |  |     |               |                       |                       |                       |      |                       |                       |                       |     |                       |   |   |
|--|--|--|--|--|-----|---------------|-----------------------|-----------------------|-----------------------|------|-----------------------|-----------------------|-----------------------|-----|-----------------------|---|---|
|  |  |  |  |  | 0.2 | 0.2           | DB;GT:/0/1:0:19,0::19 | C                     | T                     |      |                       |                       |                       |     |                       |   |   |
|  |  |  |  |  | 4.3 | 2.02          | SOMGT:/0/1:0:47,0::47 | T                     | C                     |      |                       |                       |                       |     |                       |   |   |
|  |  |  |  |  | 0.6 | 0.0010.0241,N | SOMGT:/0/1:0:59,0::60 | G                     | A                     |      |                       |                       |                       |     |                       |   |   |
|  |  |  |  |  | 1,A | 5.6           | 8.61                  | SOMGT:/0/1:0:59,0::59 | C                     | T    |                       |                       |                       |     |                       |   |   |
|  |  |  |  |  |     |               | SOMGT:/0/1:0:28,0::28 | C                     | A                     |      |                       |                       |                       |     |                       |   |   |
|  |  |  |  |  |     |               | SOMGT:/0/1:0:45,0::45 | C                     | T                     |      |                       |                       |                       |     |                       |   |   |
|  |  |  |  |  |     |               | 0.1                   | 0                     | SOMGT:/0/1:0:11,0::8  | C    | A                     |                       |                       |     |                       |   |   |
|  |  |  |  |  |     |               | 0                     |                       | SOMGT:/0/1:0:8,0::3   | C    | A                     |                       |                       |     |                       |   |   |
|  |  |  |  |  |     |               | 3.9                   | 4.59                  | SOMGT:/0/1:0:108,0::1 | C    | T                     |                       |                       |     |                       |   |   |
|  |  |  |  |  |     |               | 0.0                   | 0.998                 | 1.0,D                 | 1.00 | 4.03                  | SOMGT:/0/1:0:31,0::31 | C                     | A   |                       |   |   |
|  |  |  |  |  | ##  | 0             |                       |                       |                       | 0    | SOMGT:/0/1:0:60,1::61 | C                     | T                     |     |                       |   |   |
|  |  |  |  |  |     |               |                       |                       |                       |      | SOMGT:/0/1:0:24,0::24 | A                     | T                     |     |                       |   |   |
|  |  |  |  |  |     |               |                       |                       |                       |      | SOMGT:/0/1:0:18,0::19 | G                     | A                     |     |                       |   |   |
|  |  |  |  |  |     |               |                       |                       |                       |      | SOMGT:/0/1:0:105,0::1 | C                     | G                     |     |                       |   |   |
|  |  |  |  |  |     |               |                       |                       |                       |      | SOMGT:/0/1:0:29,0::30 | G                     | A                     |     |                       |   |   |
|  |  |  |  |  |     |               |                       |                       |                       |      | SOMGT:/0/1:0:68,1::69 | G                     | A                     |     |                       |   |   |
|  |  |  |  |  |     |               |                       |                       |                       |      | SOMGT:/0/1:0:71,0::72 | G                     | A                     |     |                       |   |   |
|  |  |  |  |  |     |               |                       |                       |                       |      | SOMGT:/0/1:0:18,0::18 | C                     | G                     |     |                       |   |   |
|  |  |  |  |  |     |               |                       |                       |                       |      | SOMGT:/0/1:0:82,0::82 | G                     | C                     |     |                       |   |   |
|  |  |  |  |  |     |               |                       |                       |                       |      | SOMGT:/0/1:0:92,0::92 | G                     | T                     |     |                       |   |   |
|  |  |  |  |  |     |               |                       |                       |                       |      | SOMGT:/0/1:0:54,0::56 | G                     | C                     |     |                       |   |   |
|  |  |  |  |  |     |               |                       |                       |                       |      | SOMGT:/0/1:0:35,0::35 | G                     | A                     |     |                       |   |   |
|  |  |  |  |  |     |               |                       |                       |                       |      | SOMGT:/0/1:0:40,0::40 | C                     | A                     |     |                       |   |   |
|  |  |  |  |  |     |               |                       |                       |                       |      | SOMGT:/0/1:0:43,0::43 | T                     | C                     |     |                       |   |   |
|  |  |  |  |  |     |               |                       |                       |                       |      | SOMGT:/0/1:0:21,0::21 | C                     | T                     |     |                       |   |   |
|  |  |  |  |  |     |               |                       |                       |                       |      | SOMGT:/0/1:0:89,0::90 | C                     | T                     |     |                       |   |   |
|  |  |  |  |  |     |               |                       |                       |                       |      | SOMGT:/0/1:0:35,0::35 | T                     | C                     |     |                       |   |   |
|  |  |  |  |  | ##  | 0             |                       |                       |                       |      | SOMGT:/0/1:0:40,0::40 | C                     | T                     |     |                       |   |   |
|  |  |  |  |  |     |               |                       |                       |                       |      | SOMGT:/0/1:0:98,0::98 | A                     | G                     |     |                       |   |   |
|  |  |  |  |  |     |               |                       |                       |                       |      | SOMGT:/0/1:0:16,0::16 | G                     | A                     |     |                       |   |   |
|  |  |  |  |  |     |               |                       |                       |                       |      | SOMGT:/0/1:0:88,0::88 | C                     | G                     |     |                       |   |   |
|  |  |  |  |  |     |               |                       |                       |                       |      | SOMGT:/0/1:0:165,0::1 | C                     | T                     |     |                       |   |   |
|  |  |  |  |  |     |               |                       |                       |                       |      | SOMGT:/0/1:0:144,0::1 | G                     | C                     |     |                       |   |   |
|  |  |  |  |  |     |               |                       |                       |                       |      | SOMGT:/0/1:0:122,0::1 | C                     | A                     |     |                       |   |   |
|  |  |  |  |  |     |               |                       |                       |                       |      | SOMGT:/0/1:0:48,0::48 | C                     | A                     |     |                       |   |   |
|  |  |  |  |  |     |               |                       |                       |                       |      | 0.1                   | 0.1                   | DB;GT:/0/1:0:24,0::24 | A   | G                     |   |   |
|  |  |  |  |  |     |               |                       |                       |                       |      |                       |                       | SOMGT:/0/1:0:24,0::24 | G   | T                     |   |   |
|  |  |  |  |  |     |               |                       |                       |                       |      |                       |                       | SOMGT:/0/1:0:120,0::1 | T   | G                     |   |   |
|  |  |  |  |  |     |               |                       |                       |                       |      |                       |                       | 0.2                   | 0.3 | SOMGT:/0/1:0:8,0::8   | C | A |
|  |  |  |  |  |     |               |                       |                       |                       |      |                       |                       |                       |     | SOMGT:/0/1:0:79,0::79 | G | T |
|  |  |  |  |  |     |               |                       |                       |                       |      |                       |                       |                       |     | SOMGT:/0/1:0:24,0::24 | C | G |
|  |  |  |  |  |     |               |                       |                       |                       |      |                       |                       |                       |     | SOMGT:/0/1:0:31,0::31 | C | A |
|  |  |  |  |  |     |               |                       |                       |                       |      |                       |                       |                       |     | SOMGT:/0/1:0:80,0::80 | G | C |
|  |  |  |  |  |     |               |                       |                       |                       |      |                       |                       |                       |     | SOMGT:/0/1:0:25,0::25 | G | A |
|  |  |  |  |  |     |               |                       |                       |                       |      |                       |                       |                       |     | SOMGT:/0/1:0:48,0::43 | G | T |
|  |  |  |  |  |     |               |                       |                       |                       |      |                       |                       |                       |     | SOMGT:/0/1:0:110,0::1 | G | C |
|  |  |  |  |  |     |               |                       |                       |                       |      |                       |                       |                       |     | SOMGT:/0/1:0:10,0::10 | T | C |
|  |  |  |  |  |     |               |                       |                       |                       |      |                       |                       |                       |     | SOMGT:/0/1:0:15,0::14 | G | A |
|  |  |  |  |  |     |               |                       |                       |                       |      |                       |                       |                       |     | SOMGT:/0/1:0:16,0::16 | T | C |
|  |  |  |  |  |     |               |                       |                       |                       |      |                       |                       |                       |     | SOMGT:/0/1:0:83,0::83 | G | A |
|  |  |  |  |  | ##  | 0             |                       |                       |                       |      |                       |                       |                       |     | SOMGT:/0/1:0:128,0::1 | G | A |
|  |  |  |  |  | ##  | 0             | 0.0                   | 0.998                 | 1.0,D                 | 1,D  | 5                     | 4.32                  |                       |     | SOMGT:/0/1:0:65,0::65 | T | A |
|  |  |  |  |  |     |               |                       |                       |                       |      |                       |                       |                       |     | SOMGT:/0/1:0:151,0::1 | T | G |
|  |  |  |  |  |     |               |                       |                       |                       |      |                       |                       |                       |     | SOMGT:/0/1:0:21,0::21 | C | T |

|       |  |     |       |       |        |               |                            |                         |   |
|-------|--|-----|-------|-------|--------|---------------|----------------------------|-------------------------|---|
|       |  |     |       |       |        | 0.            | SOMGT:/0/1:0:29,0::29 T    | G                       |   |
|       |  |     |       |       |        |               | SOMGT:/0/1:0:100,0::1 G    | C                       |   |
|       |  |     |       |       |        |               | SOMGT:/0/1:0:52,0::52 C    | G                       |   |
|       |  |     |       |       |        |               | SOMGT:/0/1:0:37,0::37 G    | A                       |   |
|       |  |     |       |       |        |               | SOMGT:/0/1:0:27,0::27 A    | G                       |   |
|       |  |     |       |       |        |               | SOMGT:/0/1:0:29,0::29 G    | A                       |   |
|       |  |     |       |       |        |               | SOMGT:/0/1:0:11,0::11 G    | C                       |   |
|       |  | 0.0 | 0.422 | 0.938 | 1,D    | 2.9 1.62      | SOMGT:/0/1:0:94,0::94 A    | G                       |   |
|       |  |     |       |       |        | 0 0           | DB;SOMGT:/0/1:0:33,1::35 G | A                       |   |
|       |  | 0.0 | 1.0   | D     | 1.0    | D             | 5.4 4.70                   | SOMGT:/0/1:0:27,0::27 C | A |
|       |  | 0.0 | 0.776 | 0.97  | 1,0.99 | 5.9 3.43      | SOMGT:/0/1:0:52,0::52 C    | T                       |   |
|       |  |     |       |       |        | 0.2 0         | SOMGT:/0/1:0:28,0::28 T    | C                       |   |
|       |  |     |       |       |        | 3.1 4.26      | SOMGT:/0/1:0:65,0::65 G    | A                       |   |
| 0.243 |  |     |       |       |        | 0 0           | SOMGT:/0/1:0:23,0::24 T    | G                       |   |
| 5E-04 |  |     |       |       |        |               | SOMGT:/0/1:0:12,0::12 G    | C                       |   |
|       |  | 0.1 | 0.483 | 0.919 | 1.00   | 5.7 2.46      | SOMGT:/0/1:0:47,0::47 T    | A                       |   |
|       |  | 0.0 | 0.992 | 1.0   | D      | 1.00 2.3 1.66 | SOMGT:/0/1:0:45,0::45 C    | T                       |   |
|       |  | 0.0 | 0.868 | 0.993 | 1.00   | 5.8 2.89      | SOMGT:/0/1:0:48,0::48 C    | A                       |   |
|       |  | 0.0 | 0.991 | 1.0   | D      | 1,D 4.5 4.02  | SOMGT:/0/1:0:40,0::40 G    | A                       |   |
|       |  |     |       |       |        |               | SOMGT:/0/1:0:60,0::60 G    | A                       |   |
|       |  |     |       |       |        |               | SOMGT:/0/1:0:56,0::57 T    | C                       |   |
|       |  |     |       |       |        | 0.            | SOMGT:/0/1:0:11,0::9 C     | A                       |   |
|       |  |     |       |       |        | 0 0           | SOMGT:/0/1:0:10,0::10 G    | A                       |   |
|       |  |     |       |       |        | 0.1 0.4       | SOMGT:/0/1:0:31,0::22 G    | A                       |   |
|       |  |     |       |       |        | 0.5 0.5       | DB;SOMGT:/0/1:0:24,0::24 T | A                       |   |
|       |  |     |       |       |        | 0             | SOMGT:/0/1:0:16,0::14 T    | A                       |   |
|       |  |     |       |       |        | 0.            | SOMGT:/0/1:0:37,1::25 C    | A                       |   |
|       |  |     |       |       |        | 1.25 0 0      | SOMGT:/0/1:0:10,0::10 G    | C                       |   |
|       |  |     |       |       |        | 1.90 0.1 0    | DB;SOMGT:/0/1:0:37,1::38 C | T                       |   |
|       |  |     |       |       |        | 0.            | SOMGT:/0/1:0:8,0::8 C      | T                       |   |
|       |  |     |       |       |        |               | SOMGT:/0/1:0:8,0::8 C      | A                       |   |
|       |  |     |       |       |        |               | SOMGT:/0/1:0:8,0::8 C      | G                       |   |
|       |  |     |       |       |        | 0 0.4         | SOMGT:/0/1:0:9,0::8 C      | A                       |   |
|       |  |     |       |       |        |               | SOMGT:/0/1:0:29,0::29 G    | T                       |   |
|       |  |     |       |       |        |               | SOMGT:/0/1:0:8,0::8 C      | A                       |   |
| 0.468 |  |     |       |       |        | 0.2 0.6       | SOMGT:/0/1:0:9,0::9 C      | T                       |   |
|       |  |     |       |       |        | 0 0           | SOMGT:/0/1:0:33,0::33 T    | C                       |   |
|       |  |     |       |       |        | 0 0           | DB;SOMGT:/0/1:0:25,0::25 T | C                       |   |
|       |  |     |       |       |        | 2.1 0.1       | 0 SOMGT:/0/1:0:44,1::45 T  | C                       |   |
|       |  |     |       |       |        | 0.            | SOMGT:/0/1:0:10,0::10 G    | C                       |   |
|       |  |     |       |       |        | 0.            | SOMGT:/0/1:0:12,0::12 T    | A                       |   |
|       |  |     |       |       |        | 0.            | SOMGT:/0/1:0:10,0::10 G    | A                       |   |
|       |  |     |       |       |        | 0 0           | DB;SOMGT:/0/1:0:25,0::26 A | G                       |   |
|       |  |     |       |       |        |               | SOMGT:/0/1:0:36,1::37 T    | G                       |   |
|       |  |     |       |       |        |               | SOMGT:/0/1:0:10,0::11 T    | A                       |   |
| 0.134 |  |     |       |       |        | 0.2 0.2       | SOMGT:/0/1:0:8,0::8 C      | G                       |   |
|       |  |     |       |       |        | 0.1 0.3       | SOMGT:/0/1:0:10,0::9 C     | C                       |   |
|       |  |     |       |       |        | 0 0           | SOMGT:/0/1:0:22,0::20 C    | T                       |   |
|       |  |     |       |       |        | 0 0           | SOMGT:/0/1:0:37,1::26 G    | A                       |   |
|       |  |     |       |       |        | 0.            | SOMGT:/0/1:0:9,0::9 C      | T                       |   |
|       |  |     |       |       |        | 0 0.1         | DB;SOMGT:/0/1:0:26,0::26 G | T                       |   |
|       |  |     |       |       |        | 0.            | DB;SOMGT:/0/1:0:40,0::40 A | T                       |   |
|       |  |     |       |       |        | 0 0           | DB;SOMGT:/0/1:0:19,0::17 G | A                       |   |
|       |  |     |       |       |        | 0 0           | SOMGT:/0/1:0:12,0::12 G    | T                       |   |

|       |  |  |           |       |      |     |      |     |     |                                  |   |
|-------|--|--|-----------|-------|------|-----|------|-----|-----|----------------------------------|---|
|       |  |  |           |       |      |     |      | 0   | 0   | SOMGT:/0/1:0:22,0:..:21 C        | A |
| 0.268 |  |  |           |       |      |     |      |     | 0   | SOMGT:/0/1:0:131,1:..:7 C        | A |
|       |  |  |           |       |      |     |      |     |     | SOMGT:/0:87 0/1:106,27 T         | G |
| 0.444 |  |  |           |       |      |     |      | 0.2 | 0.5 | DB;SOMGT:/0:22 0/1:23,4:37 G     | C |
|       |  |  |           |       |      |     |      |     |     | SOMGT:/0:16 0/1:28,7:17 G        | T |
|       |  |  |           |       |      |     |      | 0.1 | 0.4 | SOMGT:/0:12 0/1:17,5:37 C        | G |
|       |  |  |           |       |      |     |      |     | 0   | 0 SOMGT:/0:13 0/1:25,4:37 C      | G |
|       |  |  |           |       |      |     |      |     | 0   | SOMGT:/0:22 0/1:59,7:3E G        | T |
|       |  |  |           |       |      |     |      | 0.2 | 0.5 | SOMGT:/0:14 0/1:29,17:3 C        | A |
|       |  |  |           |       |      |     |      |     | 0   | 0 SOMGT:/0:11 0/1:25,5:34 G      | T |
|       |  |  |           |       |      |     |      |     |     | SOMGT:/0:37 0/1:36,6:37 T        | G |
|       |  |  |           |       |      |     |      |     |     | SOMGT:/0:8,(0/1:34,6:37 G        | T |
|       |  |  |           |       |      |     |      |     | 0   | 0.1 SOMGT:/0:18 0/1:40,8:21 C    | T |
|       |  |  |           |       |      |     |      |     |     | SOMGT:/0:13 0/1:20,8:14 G        | T |
| 0.011 |  |  |           |       |      |     |      | 0.1 | 0   | SOMGT:/0:15 0/1:29,24:3 C        | T |
|       |  |  |           |       |      |     |      | 0.1 | 0.4 | SOMGT:/0:8,(0/1:11,8:3E A        | G |
|       |  |  |           |       |      |     |      |     |     | SOMGT:/0:9,(0/1:26,4:37 T        | C |
|       |  |  |           |       |      |     |      | 0.1 | 0.3 | SOMGT:/0:18 0/1:16,5:34 G        | A |
|       |  |  |           |       |      |     |      |     |     | SOMGT:/0:10 0/1:30,6:37 T        | A |
|       |  |  |           |       |      |     |      |     |     | SOMGT:/0:13 0/1:39,5:2E C        | A |
|       |  |  |           |       |      |     |      |     |     | SOMGT:/0:20 0/1:25,4:37 C        | T |
| 0.336 |  |  |           |       |      |     |      | 0.1 | 0.3 | DB;SOMGT:/0:51 0/1:125,17 C      | G |
|       |  |  |           |       |      |     |      | 0.1 | 0.1 | SOMGT:/0:12 0/1:11,7:3E G        | C |
|       |  |  |           |       |      |     |      |     | 0   | SOMGT:/0:41 0/1:117,18 C         | G |
|       |  |  |           |       |      |     |      |     | 0   | SOMGT:/0:46 0/1:117,17 T         | A |
|       |  |  | 0.0:0.173 | 0.763 | 1.00 | 5.2 | 2.74 |     | 0   | SOMGT:/0:58 0/1:134,13 T         | G |
|       |  |  |           |       |      |     |      |     | 0   | SOMGT:/0:8,(0/1:9,5:37: G        | T |
|       |  |  |           |       |      |     |      |     | 0   | 0 SOMGT:/0:8,(0/1:5,6:37: C      | T |
|       |  |  |           |       |      |     |      |     | 0   | 0.1 SOMGT:/0:8,(0/1:9,5:37: C    | A |
|       |  |  |           |       |      | 2.7 |      |     |     | SOMGT:/0:15 0/1:57,7:2C A        | C |
|       |  |  |           |       |      |     | 1.80 |     |     | SOMGT:/0:12 0/1:44,6:37 T        | C |
|       |  |  |           |       |      |     |      |     | 0   | 0 SOMGT:/0:35 0/1:72,9:37 T      | G |
|       |  |  |           |       |      |     |      |     | 0   | 0.1 SOMGT:/0:17 0/1:35,4:34 C    | T |
|       |  |  |           |       |      |     |      |     |     | SOMGT:/0:11 0/1:34,4:3C A        | T |
|       |  |  |           |       |      |     |      |     | 0   | 0.1 SOMGT:/0:10 0/1:20,7:3E G    | A |
|       |  |  |           |       |      |     |      |     | 0   | 0.1 SOMGT:/0:14 0/1:43,4:37 C    | T |
|       |  |  |           |       |      |     |      |     | 0   | SOMGT:/0:16 0/1:34,6:37 G        | A |
|       |  |  |           |       |      |     |      |     | 0   | SOMGT:/0:12 0/1:19,36:3 T        | C |
|       |  |  |           |       |      |     |      |     | 0   | 0 SOMGT:/0:13 0/1:7,4:37: C      | T |
| 0.49  |  |  |           |       |      |     |      |     | 0   | 0.2 DB;SOMGT:/0:37 0/1:72,8:37 G | A |
|       |  |  |           |       |      |     |      |     | 0   | 0 SOMGT:/0:18 0/1:17,8:3E G      | A |
|       |  |  |           |       |      |     |      |     | 0   | 0.1 DB;SOMGT:/0:20 0/1:84,10:3 G | T |
|       |  |  |           |       |      |     |      |     | 0   | 0.1 DB;SOMGT:/0:34 0/1:55,9:3E T | C |
|       |  |  |           |       |      | 2.2 |      |     | 0   | 0.1 DB;SOMGT:/0:40 0/1:70,10:3 C | T |
|       |  |  |           |       |      |     |      |     |     | SOMGT:/0:16 0/1:44,4:3C G        | C |
|       |  |  |           |       |      |     |      |     |     | SOMGT:/0:11 0/1:38,4:37 C        | A |
|       |  |  |           |       |      |     |      |     |     | SOMGT:/0:12 0/1:8,4:37: A        | G |
|       |  |  |           |       |      |     |      |     | 0   | 0 SOMGT:/0:9,(0/1:13,6:3E G      | T |
|       |  |  |           |       |      |     |      |     |     | SOMGT:/0:44 0/1:143,17 A         | T |
| 0.458 |  |  |           |       |      |     |      | 0.1 | 0.3 | DB;SOMGT:/0:40 0/1:118,13 C      | T |
|       |  |  |           |       |      |     |      |     |     | SOMGT:/0:9,(0/1:23,4:37 C        | A |
|       |  |  |           |       |      |     |      |     |     | SOMGT:/0/1:0:104,0:..:1 C        | T |
|       |  |  |           |       |      |     |      |     | 2.3 | SOMGT:/0/1:0:47,0:..:44 C        | T |
|       |  |  |           |       |      |     |      |     | 2.9 | SOMGT:/0/1:0:33,0:..:34 G        | C |

|       |    |     |       |      |      |       |       |      |      |                          |                       |   |   |
|-------|----|-----|-------|------|------|-------|-------|------|------|--------------------------|-----------------------|---|---|
|       |    |     |       |      |      | 2.6   |       |      |      | SOMGT:/0/1:0:11,0::11    | G                     | C |   |
|       |    |     |       |      |      | 2.3   |       |      |      | SOMGT:/0/1:0:108,0::1    | C                     | T |   |
|       |    | 0.0 |       |      | 0.99 | 3.2   | 2.83  |      |      | SOMGT:/0/1:0:85,0::85    | G                     | A |   |
|       |    |     |       |      |      | 2.1   | 1.40  |      |      | SOMGT:/0/1:0:139,0::1    | G                     | T |   |
|       |    |     |       |      |      |       |       |      |      | SOMGT:/0/1:0:12,0::12    | C                     | T |   |
|       |    |     |       |      | 1,A  | 5.3   | 7.23  |      |      | SOMGT:/0/1:0:30,0::30    | C                     | T |   |
| 0.015 |    |     |       |      |      |       |       | 0    | 0    | SOMGT:/0/1:0:8,0::8      | T                     | C |   |
|       |    |     |       |      |      |       |       |      | 0    | SOMGT:/0/1:0:11,0::11    | G                     | A |   |
|       |    |     |       |      |      |       |       | 0.1  | 0.4  | SOMGT:/0/1:0:13,0::12    | C                     | T |   |
|       |    |     |       |      |      |       |       | 0    | 0    | SOMGT:/0/1:0:9,0::9      | G                     | C |   |
|       |    |     |       |      |      |       |       | 0    |      | SOMGT:/0/1:0:20,0::19    | A                     | T |   |
|       |    |     |       |      |      |       |       |      | 0    | SOMGT:/0/1:0:57,1::43    | G                     | A |   |
|       |    |     |       |      |      |       |       |      |      | SOMGT:/0/1:0:17,0::17    | A                     | C |   |
|       |    |     |       |      |      |       |       | 0    | 0.1  | SOMGT:/0/1:0:16,0::16    | T                     | G |   |
|       |    | 0.0 | 0.912 | 0.99 | 0.96 | 4.3   | 3.06  | 0    |      | SOMGT:/0/1:0:384,0::3    | C                     | T |   |
|       |    |     |       |      |      | 5.4   | 1.82  |      |      | SOMGT:/0/1:0:105,0::1    | G                     | C |   |
|       |    |     |       |      |      |       |       |      |      | SOMGT:/0/1:0:108,0::1    | G                     | A |   |
|       |    |     |       |      |      |       |       |      |      | SOMGT:/0/1:0:106,0::1    | A                     | G |   |
|       |    |     |       |      |      |       |       |      |      | SOMGT:/0/1:0:102,0::1    | C                     | T |   |
|       |    |     |       |      |      |       |       |      |      | SOMGT:/0/1:0:30,0::30    | G                     | T |   |
|       |    |     |       |      |      | 3     |       |      |      | SOMGT:/0/1:0:47,0::47    | G                     | C |   |
|       |    | ##  | 0     | 0.4  | 0.17 | 0.79  | 1,D   | 5.4  | 3.42 | SOMGT:/0/1:0:143,0::1    | G                     | A |   |
|       |    |     |       |      |      | 2.3   |       |      |      | SOMGT:/0/1:0:17,0::17    | C                     | T |   |
|       |    |     |       |      |      |       |       |      |      | SOMGT:/0/1:0:110,0::1    | G                     | C |   |
|       |    |     | 0.1   | 0.49 | 0.89 | 1,N   | 3.3   | 1.89 |      | SOMGT:/0/1:0:145,0::1    | C                     | T |   |
|       |    | ##  | 0     |      |      |       |       | 1.59 |      | SOMGT:/0/1:0:120,0::1    | C                     | T |   |
|       |    | ##  | 0     |      |      |       |       |      |      | SOMGT:/0/1:0:17,0::17    | G                     | A |   |
|       |    |     |       |      |      |       |       | 0.1  | 0    | SOMGT:/0/1:0:14,0::14    | A                     | G |   |
|       |    | ##  | 0     | 0.0  | 0.65 | 0.91  | 0.97  | 4.9  | 3.84 | SOMGT:/0/1:0:23,0::23    | C                     | G |   |
|       |    |     |       |      |      |       |       |      |      | SOMGT:/0/1:0:155,0::1    | A                     | G |   |
| 0.001 | 0  | 0   | 0     | 0.2  | 0.18 | 0.79  | 1.94  | 3.4  |      | DB;SOMGT:/0/1:0:109,0::1 | G                     | A |   |
|       |    |     |       |      |      |       |       |      |      | SOMGT:/0/1:0:14,0::14    | C                     | T |   |
|       |    |     |       |      |      | 1,D   | 2.9   | 6.40 |      | SOMGT:/0/1:0:67,0::67    | G                     | A |   |
|       |    |     |       |      |      | 1,D   | 5.1   | 4.27 |      | SOMGT:/0/1:0:55,0::55    | G                     | C |   |
|       |    |     | 0.0   | 0.81 | 0.91 | 1.00  | 4.4   | 4.65 |      | SOMGT:/0/1:0:148,0::1    | C                     | T |   |
|       |    |     |       |      |      |       |       |      |      | SOMGT:/0/1:0:125,0::1    | T                     | C |   |
|       |    |     |       |      |      |       |       |      |      | SOMGT:/0/1:0:23,0::23    | C                     | T |   |
|       |    |     | 0.0   | 0.17 | 0.69 | 1.00  | 5.1   | 2.94 | 0    | SOMGT:/0/1:0:311,1::3    | G                     | A |   |
|       |    |     | 0.0   | 0.02 | 0.00 | 0.85  | 3.7   | 2.36 |      | SOMGT:/0/1:0:106,1::1    | G                     | A |   |
|       |    |     |       |      |      |       |       |      |      | SOMGT:/0/1:0:21,0::21    | G                     | A |   |
|       |    |     | 0.0   | 0.26 | 0.89 | 1.075 | 4.5   | 3.26 |      | SOMGT:/0/1:0:141,1::1    | C                     | G |   |
|       |    |     |       |      |      |       | 2.6   | 2.09 |      | SOMGT:/0/1:0:17,0::17    | C                     | G |   |
|       |    | ##  | 0     |      |      |       |       |      |      | SOMGT:/0/1:0:26,0::26    | T                     | C |   |
|       |    |     | 0.0   | 0.61 | 0.91 | 1,D   | 5.1   | 3.61 |      | SOMGT:/0/1:0:25,0::25    | A                     | T |   |
|       |    |     |       |      |      |       |       |      |      | SOMGT:/0/1:0:61,0::61    | G                     | A |   |
| 2E-04 | 0  | 0   |       |      |      |       | 4.6   | 2.69 |      | SOMGT:/0/1:0:161,0::1    | T                     | G |   |
|       | 0  | ##  | 0     | 0.0  | 0.88 | 1.99  | 1,N   | 3.2  | 1.45 | SOMGT:/0/1:0:310,1::3    | C                     | T |   |
|       |    | ##  | 0     |      |      |       | 2.4   |      |      | SOMGT:/0/1:0:185,0::1    | G                     | A |   |
|       |    | ##  | 0     |      |      |       |       |      | 0    | SOMGT:/0/1:0:59,0::59    | G                     | A |   |
|       |    |     |       |      |      |       |       |      |      | SOMGT:/0/1:0:8,0::7      | T                     | G |   |
|       |    |     |       |      |      |       |       |      |      | SOMGT:/0/1:0:17,0::17    | C                     | T |   |
| 2E-04 | ## | 0   |       |      |      |       | 2.9   | 2.55 |      | SOMGT:/0/1:0:109,0::1    | G                     | A |   |
| 2E-04 | ## | ##  | 0     | 0.1  | 0.04 | 1.06  | 4.075 | 4.1  | 2.41 | SOMGT:/0/1:0:28,0::28    | G                     | A |   |
| 6E-04 | 0  | 0   |       |      |      |       |       |      | 0    | 0                        | SOMGT:/0/1:0:29,0::29 | G | A |

|       |    |    |           |           |       |      |      |         |                            |   |
|-------|----|----|-----------|-----------|-------|------|------|---------|----------------------------|---|
|       | ## | 0  |           |           |       |      |      |         | SOMGT:/0/1:0:27,0::27 G    | A |
|       | ## | 0  | 0.1:0.557 | 0.853     | 0.98  | 2.8  | 3.03 | 0       | SOMGT:/0/1:0:178,0::1 G    | A |
| 2E-04 |    |    |           |           |       |      |      |         | SOMGT:/0/1:0:10,0::10 C    | T |
|       |    |    | 0.0:0.999 | 1.0,D     | 1,D   | 5.2  | 5.53 |         | SOMGT:/0/1:0:25,0::25 G    | A |
|       |    |    |           |           |       |      |      | 0 0     | SOMGT:/0/1:0:10,0::10 A    | T |
|       |    |    |           |           |       |      |      |         | SOMGT:/0/1:0:24,0::25 C    | T |
|       | 0  | 0  |           |           |       | 3.4  | 1.86 | 0 0     | SOMGT:/0/1:0:10,0::10 C    | G |
|       |    |    |           |           |       |      | 2.44 |         | SOMGT:/0/1:0:41,0::41 T    | C |
|       | ## | 0  | 0.0:0.002 | 0.012     | 0.99  |      | 3.22 |         | SOMGT:/0/1:0:32,0::32 G    | A |
|       |    |    |           |           |       |      |      |         | SOMGT:/0/1:0:90,0::90 G    | C |
|       |    |    |           |           |       |      |      |         | SOMGT:/0/1:0:97,0::97 G    | A |
|       |    |    | 0.6:0.999 | 1.0,D     | 1,D   | 4.7  | 4.05 |         | SOMGT:/0/1:0:141,1::1 C    | G |
| 0.001 | 0  | 0  | 0.1:0.277 | 0.881     | 0.88  | 4.4  | 3.43 |         | SOMGT:/0/1:0:109,0::1 G    | A |
|       |    |    |           |           |       | 3.9  | 1.92 |         | SOMGT:/0/1:0:21,0::21 T    | C |
|       |    |    |           |           |       |      | 2.06 |         | SOMGT:/0/1:0:29,0::29 G    | T |
|       |    |    |           |           |       |      |      | 0.1 0.1 | SOMGT:/0/1:0:8,0::8 C      | G |
|       |    |    |           |           |       |      |      |         | SOMGT:/0/1:0:120,0::1 C    | A |
|       |    |    |           |           |       |      |      |         | SOMGT:/0/1:0:88,0::88 A    | C |
|       |    |    |           |           |       | 2.69 |      |         | SOMGT:/0/1:0:21,0::21 C    | T |
|       |    |    |           |           |       | 4.15 |      |         | SOMGT:/0/1:0:30,0::30 C    | T |
|       | ## | 0  | 0.0:0.541 | 0.948     | 1,N   | 2.41 |      |         | SOMGT:/0/1:0:55,1::56 C    | T |
| 2E-04 | ## | 0  |           |           |       |      |      |         | SOMGT:/0/1:0:15,0::15 C    | T |
|       |    |    |           |           |       |      |      |         | SOMGT:/0/1:0:41,0::41 C    | T |
|       |    |    |           |           |       |      |      |         | SOMGT:/0/1:0:9,0::9 C      | C |
|       |    |    |           |           |       |      |      | 0 0     | SOMGT:/0/1:0:53,1::53 A    | G |
|       |    |    |           |           |       |      |      | 0 0     | SOMGT:/0/1:0:50,1::50 G    | A |
|       |    |    |           |           |       |      |      |         | SOMGT:/0/1:0:23,0::24 T    | C |
| 2E-04 | ## | 0  |           |           |       | 1.00 |      |         | SOMGT:/0/1:0:84,0::84 C    | T |
|       | 0  | 0  |           |           |       | 3.8  |      |         | SOMGT:/0/1:0:66,0::66 C    | T |
|       | ## | 0  |           |           |       |      |      |         | SOMGT:/0/1:0:149,0::1 G    | A |
|       |    |    |           |           |       |      |      |         | SOMGT:/0/1:0:13,0::13 T    | G |
|       |    |    |           |           |       |      |      | 0 0     | SOMGT:/0/1:0:14,0::14 T    | G |
|       |    |    | 0.0,0.0,B | 0.0,B     | 1,N   |      |      |         | SOMGT:/0/1:0:56,0::56 G    | C |
| 1E-03 | 0  | 0  | 0         |           |       |      |      | 0 0     | SOMGT:/0/1:0:162,0::1 G    | A |
|       |    |    |           |           |       |      |      |         | SOMGT:/0/1:0:27,0::27 G    | T |
| 0.348 |    |    |           |           |       |      |      | 0.1 0.2 | DB;SOMGT:/0/1:0:19,0::19 C | G |
|       |    |    |           |           |       |      |      | 0       | SOMGT:/0/1:0:9,0::9 C      | C |
|       | ## |    |           |           |       | 1.49 |      | 0       | SOMGT:/0/1:0:126,0::1 G    | A |
|       | ## | 0  |           |           |       |      |      |         | SOMGT:/0/1:0:165,1::1 G    | A |
|       |    |    |           |           |       | 2.4  |      |         | SOMGT:/0/1:0:164,0::1 G    | A |
|       |    |    |           |           |       | 4    | 3.19 |         | SOMGT:/0/1:0:38,0::38 C    | T |
|       | ## | ## | 0         | 0.0:0.942 | 1.0,D | 1.00 | 4.6  | 1.33    | SOMGT:/0/1:0:38,0::38 G    | A |
|       |    |    |           |           |       |      |      |         | SOMGT:/0/1:0:95,1::96 C    | A |
| 0.086 |    |    |           |           |       |      |      | 0 0.1   | SOMGT:/0/1:0:11,0::10 A    | G |
|       |    |    |           |           |       |      |      |         | SOMGT:/0/1:0:83,0::35 A    | G |
|       | 0  | 0  |           |           |       |      |      | 0 0     | SOMGT:/0/1:0:40,1::39 G    | C |
|       |    |    |           |           |       | 2.3  |      |         | SOMGT:/0/1:0:60,1::61 C    | G |
|       |    |    |           |           |       |      |      |         | SOMGT:/0/1:0:25,0::25 G    | A |
|       |    |    |           |           |       |      |      |         | SOMGT:/0/1:0:30,0::30 G    | C |
|       |    |    |           |           |       |      |      |         | SOMGT:/0/1:0:110,0::1 G    | A |
|       |    |    |           |           |       | 1,A  | 4.6  | 8.20    | SOMGT:/0/1:0:70,0::70 C    | T |
|       |    |    | 0.1:0.007 | 0.02,1    | 1,N   |      |      |         | SOMGT:/0/1:0:37,0::37 A    | G |
|       |    |    |           |           |       |      |      |         | SOMGT:/0/1:0:112,1::1 C    | T |
|       |    |    |           |           |       |      |      | 0 0     | SOMGT:/0/1:0:16,0::15 A    | G |

|       |    |    |           |       |           |       |       |              |                              |   |
|-------|----|----|-----------|-------|-----------|-------|-------|--------------|------------------------------|---|
|       |    |    |           |       |           |       |       | 0.           | SOMGT:/0/1:0:36,0:..:37 G    | A |
|       |    |    |           |       |           |       |       | 0.1 0.3      | SOMGT:/0/1:0:8,0:..:7:0. G   | T |
|       |    |    |           |       |           |       |       | 0 0.1        | SOMGT:/0/1:0:9,0:..:9:0. T   | A |
|       |    |    |           |       |           |       |       | 0.           | SOMGT:/0/1:0:54,0:..:53 A    | T |
|       |    |    |           |       |           |       |       | 0.2 0.2      | SOMGT:/0/1:0:9,0:..:8:0. G   | T |
|       |    | 0  | 0.        |       |           |       |       | 0.2 0.4      | DB;SOMGT:/0/1:0:39,1:..:40 G | A |
|       |    |    |           |       |           |       |       |              | SOMGT:/0/1:0:40,1:..:34 C    | T |
|       |    |    |           |       |           |       |       |              | SOMGT:/0/1:0:49,0:..:49 G    | T |
| 2E-04 | ## | 0. |           |       |           |       |       |              | SOMGT:/0/1:0:50,0:..:51 G    | A |
|       |    |    |           |       |           |       |       | 3.7 1.32.    | SOMGT:/0/1:0:21,0:..:21 G    | A |
| 2E-04 | ## | 0. |           |       |           |       |       | 3.4 2.15 0 0 | SOMGT:/0/1:0:110,1:..:1 C    | T |
|       | ## | 0  | 0.0,1.0,D | 1.0,D | 1.00      | 3.1   | 4.05  | 0.           | SOMGT:/0/1:0:199,1:..:2 C    | T |
|       |    |    | 0.0       | 0.99  | 0.99      | 0.99  | 4.6   | 3.60.        | SOMGT:/0/1:0:274,0:..:2 G    | C |
|       |    |    |           |       |           |       |       | 0 0          | SOMGT:/0/1:0:15,0:..:13 T    | C |
|       |    |    |           |       |           |       |       | 3.3.         | SOMGT:/0/1:0:38,0:..:38 A    | G |
|       | ## | ## | 0         | 0.0   | 0.12,0.08 | 0.58  | 2.62. |              | SOMGT:/0/1:0:58,0:..:58 G    | A |
|       |    | 0  | 0         | 0.4   | 0.002     | 0.002 | 1,N   | 0.           | SOMGT:/0/1:0:34,0:..:36 C    | T |
| 2E-04 | 0  | 0  | 0.        |       |           |       |       | 2.2.         | SOMGT:/0/1:0:84,0:..:84 C    | T |
|       | 0  | 0  | 0         | 0.6   | 0.003     | 0.003 | 1,N   | 2.04.        | SOMGT:/0/1:0:80,0:..:80 G    | A |
|       |    |    |           |       |           |       | 1,D   | 4.1 9.70.    | SOMGT:/0/1:0:148,0:..:1 C    | T |
|       |    |    |           |       |           |       |       |              | SOMGT:/0/1:0:47,0:..:47 T    | G |
|       |    |    |           |       |           |       |       |              | SOMGT:/0/1:0:69,1:..:70 T    | C |
|       |    |    |           |       |           |       |       |              | SOMGT:/0/1:0:55,0:..:55 G    | A |
|       |    |    |           |       |           |       |       |              | SOMGT:/0/1:0:47,0:..:48 G    | A |
|       |    |    |           |       |           |       |       | 0.2 0.2      | DB;SOMGT:/0/1:0:26,0:..:23 A | T |
|       |    |    |           |       |           |       |       | 0 0          | SOMGT:/0/1:0:9,0:..:9:0. T   | C |
|       |    |    |           |       |           |       |       |              | SOMGT:/0/1:0:25,0:..:25 G    | A |
|       | ## | 0. |           |       |           |       |       |              | SOMGT:/0/1:0:92,0:..:93 C    | T |
|       |    |    |           |       |           |       |       |              | SOMGT:/0/1:0:28,0:..:28 C    | T |
|       |    |    |           |       |           |       |       | 2.2 1.64.    | SOMGT:/0/1:0:16,0:..:16 C    | A |
|       |    |    | 0.2       | 0.002 | 0.005     | 0.99  | 4.3   | 1.98.        | SOMGT:/0/1:0:130,1:..:1 G    | A |
|       |    |    |           |       |           |       |       | 2.7.         | SOMGT:/0/1:0:59,0:..:59 G    | A |
| 2E-04 | ## | 0. |           |       |           |       |       | 0.           | SOMGT:/0/1:0:55,0:..:55 G    | A |
| 2E-04 |    |    |           |       |           |       |       | 2.3.         | 0. SOMGT:/0/1:0:21,0:..:21 A | T |
|       |    |    |           |       |           |       |       |              | SOMGT:/0/1:0:146,1:..:1 C    | T |
|       |    |    |           |       |           |       |       |              | SOMGT:/0/1:0:47,0:..:47 C    | A |
| 4E-04 | 0  | 0  | 0.        |       |           |       |       |              | SOMGT:/0/1:0:58,1:..:60 G    | A |
|       |    |    |           |       |           |       |       | 0 0.1        | SOMGT:/0/1:0:8,0:..:7:0. G   | A |
| 4E-04 | ## | 0. |           |       |           |       |       | 3.53 0.      | SOMGT:/0/1:0:43,0:..:43 G    | A |
| 0.003 |    |    |           |       |           |       |       | 0            | SOMGT:/0/1:0:58,1:..:59 A    | T |
|       |    |    |           |       |           |       |       | 5.4 1.35.    | SOMGT:/0/1:0:153,0:..:1 G    | T |
|       | ## | ## | 0.        |       |           |       |       | 0.           | SOMGT:/0/1:0:25,0:..:25 G    | A |
|       |    |    |           |       |           |       |       |              | SOMGT:/0/1:0:251,1:..:2 C    | T |
|       |    |    |           |       |           |       |       |              | SOMGT:/0/1:0:8,0:..:8:0. G   | A |
|       |    |    | 0.0       | 0.99  | 1.0,D     | 1,D   | 5.8   | 4.25.        | SOMGT:/0/1:0:79,0:..:80 C    | T |
|       |    |    | 0.0       | 0.99  | 1.0,D     | 1,D   | 5.9   | 4.98.        | SOMGT:/0/1:0:100,1:..:1 G    | A |
|       |    |    |           |       |           |       |       | 0.           | SOMGT:/0/1:0:56,1:..:57 G    | A |
|       |    |    |           |       |           |       |       | 0.1 0.3      | DB;SOMGT:/0/1:0:22,0:..:22 T | C |
|       |    |    |           |       |           |       |       |              | SOMGT:/0/1:0:11,0:..:11 G    | A |
|       |    |    |           |       |           |       |       |              | SOMGT:/0/1:0:9,0:..:9:0. C   | A |
|       |    |    | 0.0       | 0.544 | 0.9,P     | 1.00  | 2.7   | 3.35.        | SOMGT:/0/1:0:85,0:..:85 G    | A |
|       |    |    |           |       |           |       |       | 4.9 4.07.    | SOMGT:/0/1:0:25,0:..:25 C    | T |
|       |    |    | 0.1       | 0.2,B | 0.59      | 0.99  | 2.9   | 2.50.        | SOMGT:/0/1:0:74,1:..:76 C    | G |
|       |    |    | 0.1       | 0.55  | 0.831     | 1,N   |       |              | SOMGT:/0/1:0:65,0:..:66 T    | A |

|       |   |    |   |           |       |        |          |                                |   |
|-------|---|----|---|-----------|-------|--------|----------|--------------------------------|---|
|       |   |    |   |           |       | 0      | 0        | SOM GT:/0/1:/0:8,0:..:8:0:G    | A |
|       |   |    |   |           |       |        |          | SOM GT:/0/1:/0:43,0:..:44 G    | C |
|       |   |    |   |           |       |        |          | SOM GT:/0/1:/0:28,0:..:28 G    | C |
|       |   | ## | 0 |           |       |        |          | SOM GT:/0/1:/0:52,0:..:52 G    | A |
|       |   |    |   |           |       |        |          | SOM GT:/0/1:/0:93,0:..:93 T    | A |
|       |   |    |   |           |       |        |          | SOM GT:/0/1:/0:20,0:..:20 C    | A |
|       |   |    |   | 0.0,1.0,D | 1.0,D | 1,D    | 4.09     | SOM GT:/0/1:/0:81,1:..:82 T    | G |
|       |   |    |   |           |       |        |          | SOM GT:/0/1:/0:55,0:..:56 T    | C |
|       |   |    |   |           |       |        |          | SOM GT:/0/1:/0:14,0:..:14 T    | C |
|       |   |    |   | 0.0(1.0,D | 1.0,D | 1,D    | 5 3.25   | SOM GT:/0/1:/0:63,0:..:63 G    | A |
|       |   | ## | 0 | 0.0(0.361 | 0.517 | 1,D    | 5.7 4.40 | 0 DB;/GT:/0/1:/0:19,0:..:19 C  | T |
| 8E-04 | 0 | 0  | 0 |           |       |        |          | DB;/GT:/0/1:/0:154,0:..:1 G    | A |
|       |   |    |   |           |       |        |          | SOM GT:/0/1:/0:86,1:..:88 T    | A |
| 2E-04 |   |    |   |           |       |        |          | SOM GT:/0/1:/0:62,0:..:62 G    | A |
|       |   |    |   |           |       |        |          | SOM GT:/0/1:/0:33,0:..:33 G    | A |
|       |   |    |   |           |       |        | 1.37     | SOM GT:/0/1:/0:47,1:..:48 C    | T |
|       |   |    |   |           |       |        | 1.50     | 0 SOM GT:/0/1:/0:36,0:..:36 G  | A |
|       |   |    |   |           |       |        |          | SOM GT:/0/1:/0:31,0:..:31 G    | A |
|       |   |    |   | 0.1(0.687 | 0.623 | 0.88   | 2.43     | SOM GT:/0/1:/0:146,1:..:1 A    | G |
|       |   |    |   | 0.0(0.67, | 0.978 | 1,D    | 4.4 3.66 | SOM GT:/0/1:/0:110,0:..:1 C    | T |
| 0.146 |   |    |   |           |       |        |          | 0 0 SOM GT:/0/1:/0:10,0:..:9(C | C |
|       |   |    |   |           |       |        |          | 0 SOM GT:/0/1:/0:41,0:..:34 T  | A |
|       |   |    |   |           |       |        |          | SOM GT:/0/1:/0:13,0:..:13 G    | A |
|       |   |    |   |           |       |        | 2.3 2.10 | SOM GT:/0/1:/0:70,0:..:70 T    | C |
|       |   |    |   |           |       |        |          | SOM GT:/0/1:/0:98,1:..:99 C    | A |
|       |   |    |   |           |       |        |          | 0 SOM GT:/0/1:/0:37,1:..:37 A  | C |
|       |   |    |   |           |       |        |          | SOM GT:/0/1:/0:30,0:..:30 C    | A |
|       |   |    |   |           |       |        | 2.2 1.33 | SOM GT:/0/1:/0:40,0:..:40 C    | T |
|       |   |    |   |           |       |        |          | 0 SOM GT:/0/1:/0:53,0:..:53 C  | T |
|       |   |    |   |           |       |        | 3 1.38   | SOM GT:/0/1:/0:66,0:..:66 C    | A |
|       |   |    |   |           |       |        |          | SOM GT:/0/1:/0:86,0:..:86 C    | G |
|       |   |    |   |           |       |        |          | SOM GT:/0/1:/0:18,0:..:18 T    | A |
|       |   |    |   |           |       |        |          | SOM GT:/0/1:/0:13,0:..:13 T    | C |
|       |   |    |   |           |       |        |          | SOM GT:/0/1:/0:9,0:..:10(C     | T |
|       |   | ## | 0 | 0.7(0.001 | 0.0,B | 0.98   |          | SOM GT:/0/1:/0:103,0:..:1 C    | T |
|       |   |    |   | 0.0(0.996 | 1.0,D | 1.00   | 4.9 3.96 | SOM GT:/0/1:/0:55,0:..:55 A    | T |
|       |   |    |   |           |       |        |          | SOM GT:/0/1:/0:19,0:..:19 G    | A |
|       |   |    |   |           |       |        | 1.73     | SOM GT:/0/1:/0:75,0:..:75 C    | T |
|       |   |    |   |           |       |        |          | SOM GT:/0/1:/0:72,0:..:72 G    | A |
|       |   |    |   |           |       |        |          | SOM GT:/0/1:/0:29,0:..:29 G    | A |
|       |   | ## | 0 |           |       |        |          | SOM GT:/0/1:/0:125,1:..:1 G    | A |
|       |   |    |   | 0.0(0.996 | 1.0,D | 1.00   | 4 5.08   | SOM GT:/0/1:/0:150,1:..:1 G    | A |
| 2E-04 | 0 | ## | 0 |           |       |        |          | SOM GT:/0/1:/0:52,0:..:52 G    | A |
|       |   |    |   | 0.0(0.011 | 0.014 | 1.00   | 3.33     | SOM GT:/0/1:/0:56,0:..:56 G    | T |
|       |   |    |   |           |       |        |          | SOM GT:/0/1:/0:26,0:..:26 C    | T |
|       |   |    |   | 0.0(0.462 | 0.93, | 1,1.00 | 3.58     | SOM GT:/0/1:/0:19,0:..:19 T    | G |
|       |   |    |   |           |       |        |          | SOM GT:/0/1:/0:125,0:..:1 G    | A |
|       |   |    |   |           |       |        |          | SOM GT:/0/1:/0:72,0:..:72 C    | G |
|       |   |    |   |           |       |        |          | SOM GT:/0/1:/0:373,0:..:3 G    | A |
|       |   |    |   | 0.937     | 0.996 | 1,N    | 2.4 1.61 | SOM GT:/0/1:/0:110,1:..:1 C    | T |
| 3E-04 | 0 | 0  |   |           |       |        | 1.38     | 0 SOM GT:/0/1:/0:65,1:..:66 C  | T |
|       |   |    |   |           |       |        |          | SOM GT:/0/1:/0:104,0:..:1 C    | T |
|       |   | ## | 0 |           |       |        |          | SOM GT:/0/1:/0:52,0:..:52 C    | T |
|       |   |    |   |           |       |        |          | SOM GT:/0/1:/0:23,0:..:23 C    | A |



|       |    |    |     |       |       |       |      |      |      |                        |                        |                        |   |
|-------|----|----|-----|-------|-------|-------|------|------|------|------------------------|------------------------|------------------------|---|
| 5E-04 | 0  | 0  | 0.0 | 0.998 | 1.0,D | 1,D   | 4.8  | 3.91 |      | SOM                    | GT:/0/1:20:100,0:..1:G | A                      |   |
|       |    |    |     |       |       |       |      |      |      | SOM                    | GT:/0/1:20:15,0:..15:A | G                      |   |
|       |    |    |     |       |       |       |      |      |      | SOM                    | GT:/0:39 0/1:32,4:37:C | T                      |   |
|       |    |    |     |       |       |       | 0.3  | 0.4  | DB;S | GT:/0:34 0/1:83,16:3:T | C                      |                        |   |
|       |    |    |     |       |       |       | 0    |      |      | SOM                    | GT:/0:86 0/1:81,11:3:C | T                      |   |
|       | ## | ## | 0   | 0.0   | 0.999 | 1.0,D | 1.00 | 2.9  | 3.92 |                        | SOM                    | GT:/0:35 0/1:85,32:3:G | A |
|       |    |    |     |       |       | 1,A   | 5.9  | 5.29 |      |                        | SOM                    | GT:/0:30 0/1:63,13:3:G | T |
|       |    |    |     |       |       |       | 0.1  | 0.1  | DB;S | GT:/0:33 0/1:73,8:37:T | C                      |                        |   |
|       |    |    |     |       |       |       | 0    | 0.1  |      | SOM                    | GT:/0:8,(0/1:9,6:37:A  | G                      |   |
|       |    |    |     |       |       |       | 0    | 0    |      | SOM                    | GT:/0:8,(0/1:22,8:37:A | G                      |   |
|       | 0  | 0  |     |       |       |       | 0    | 0    |      | SOM                    | GT:/0:19 0/1:29,7:35:C | T                      |   |
| 0.245 | 0  | 0  |     |       |       |       | 0.1  | 0    |      | SOM                    | GT:/0:35 0/1:38,11:3:C | T                      |   |
|       |    |    |     |       |       |       | 0    |      |      | SOM                    | GT:/0:42 0/1:107,38:A  | G                      |   |
|       | ## | ## | 0   |       |       |       |      |      |      | SOM                    | GT:/0:12 0/1:122,18:C  | T                      |   |
|       |    |    |     |       |       |       |      |      |      | SOM                    | GT:/0:95 0/1:99,12:3:G | C                      |   |
|       |    |    | 0.0 | 0.915 | 0.992 | 1,D   | 3.6  | 3.92 |      | SOM                    | GT:/0:12 0/1:138,18:C  | G                      |   |
|       |    |    | 0.0 | 1.0,D | 1.0,D | 1,D   | 4.4  | 4.19 |      | SOM                    | GT:/0:78 0/1:282,65:G  | A                      |   |
|       | 0  | 0  |     |       |       |       |      |      |      | SOM                    | GT:/0:13 0/1:93,15:3:G | A                      |   |
|       |    |    |     |       |       |       |      |      |      | SOM                    | GT:/0:41 0/1:28,7:37:G | A                      |   |
|       |    |    |     |       |       |       | 2.12 |      |      | SOM                    | GT:/0:37 0/1:68,13:3:C | A                      |   |
|       |    |    |     |       |       |       |      |      |      | SOM                    | GT:/0:11 0/1:26,4:37:G | T                      |   |
|       |    |    |     |       |       |       |      |      |      | SOM                    | GT:/0:34 0/1:57,20:3:G | A                      |   |
|       |    |    |     |       |       |       |      |      |      | SOM                    | GT:/0:37 0/1:31,4:37:A | G                      |   |
|       |    |    |     |       |       |       | 0    |      | DB;S | GT:/0:55 0/1:38,6:37:A | G                      |                        |   |
|       |    |    |     |       |       |       |      |      |      | SOM                    | GT:/0:53 0/1:32,10:3:A | C                      |   |
|       | ## | ## | 0   |       |       |       | 1.89 |      |      | SOM                    | GT:/0:98 0/1:45,7:37:G | A                      |   |
|       |    |    |     |       |       |       | 2.87 |      |      | SOM                    | GT:/0:49 0/1:46,8:37:G | T                      |   |
|       |    |    | 0.0 | 0.452 | 0.9,P | 1,D   | 6.2  | 4.76 |      | SOM                    | GT:/0:12 0/1:89,20:3:G | A                      |   |
|       |    |    |     |       |       |       | 5.7  |      |      | SOM                    | GT:/0:20 0/1:249,51:G  | A                      |   |
|       |    |    | 0.0 | 0.87, | 0.998 | 1.00  | 5.7  | 1.95 |      | SOM                    | GT:/0:20 0/1:250,51:G  | T                      |   |
|       |    |    |     |       |       |       |      |      |      | SOM                    | GT:/0:91 0/1:193,29:C  | T                      |   |
|       |    |    |     |       |       |       |      |      |      | SOM                    | GT:/0:10 0/1:150,42:T  | C                      |   |
| 2E-04 |    |    |     |       |       |       |      |      |      | SOM                    | GT:/0:52 0/1:85,17:3:T | C                      |   |
|       |    |    |     |       |       |       | 0.2  | 0.2  | DB;S | GT:/0:36 0/1:29,4:37:C | T                      |                        |   |
| 2E-04 |    |    |     |       |       |       | 0    | 0    |      | SOM                    | GT:/0:8,(0/1:13,13:3:C | T                      |   |
|       |    |    | 0.5 | 0.0,B | 0.0,B | 0.99  | 2.9  |      |      | SOM                    | GT:/0:55 0/1:86,13:3:G | A                      |   |
|       |    |    |     |       |       |       | 2.2  |      |      | SOM                    | GT:/0:33 0/1:70,7:35:A | G                      |   |
|       | ## | ## | 0   | 0.2   | 0.97, | 0.999 | 1.00 | 5.7  | 4.26 |                        | SOM                    | GT:/0:52 0/1:117,20:C  | T |
|       |    |    | 0.0 | 1.0,D | 1.0,D | 1,D   | 5.8  | 4.93 |      | SOM                    | GT:/0:33 0/1:59,11:3:C | T                      |   |
|       |    |    |     |       |       |       |      |      |      | SOM                    | GT:/0:39 0/1:23,5:37:A | G                      |   |
|       |    |    |     |       |       |       | 2.5  |      |      | SOM                    | GT:/0:34 0/1:37,5:37:G | C                      |   |
|       |    |    |     |       |       |       |      |      |      | SOM                    | GT:/0:25 0/1:15,4:37:C | A                      |   |
|       |    |    |     |       |       |       |      |      |      | SOM                    | GT:/0:31 0/1:17,12:3:C | G                      |   |
|       |    |    |     |       |       |       |      |      |      | SOM                    | GT:/0:8,(0/1:13,10:3:C | G                      |   |
|       |    |    |     |       |       |       | 4.9  | 4.04 |      | SOM                    | GT:/0:19 0/1:42,38:3:C | T                      |   |
|       |    |    |     |       |       |       |      |      |      | SOM                    | GT:/0:34 0/1:25,19:3:A | T                      |   |
|       |    |    |     |       |       |       | 0.1  | 0    |      | SOM                    | GT:/0:8,(0/1:11,10:3:G | C                      |   |
|       |    |    |     |       |       |       |      |      |      | SOM                    | GT:/0:12 0/1:21,5:31:G | C                      |   |
|       |    |    |     |       |       |       |      |      |      | SOM                    | GT:/0:17 0/1:39,8:32:C | G                      |   |
|       |    |    |     |       |       |       |      |      |      | SOM                    | GT:/0:11 0/1:64,15:3:C | A                      |   |
|       |    |    | 0.1 | 0.431 | 0.876 | 1.00  | 5.7  | 2.17 |      | SOM                    | GT:/0:21 0/1:174,27:T  | C                      |   |
| 2E-04 |    |    |     |       |       |       |      |      |      | SOM                    | GT:/0:54 0/1:78,22:3:G | A                      |   |
|       |    |    |     |       |       |       | 2.3  |      |      | SOM                    | GT:/0:23 0/1:50,8:37:T | G                      |   |
|       |    |    |     |       |       |       | 4.6  | 1.39 |      | SOM                    | GT:/0:10 0/1:81,15:3:G | A                      |   |

|       |    |       |       |       |       |       |      |       |                            |                            |   |
|-------|----|-------|-------|-------|-------|-------|------|-------|----------------------------|----------------------------|---|
|       |    |       |       |       |       |       |      |       | SOM GT:/0:26 0/1:61,17:3T  | A                          |   |
|       |    | 0.0   | 0.992 | 1.0,D | 1,D   | 4.7   | 4.84 |       | SOM GT:/0:15 0/1:173,45 G  | C                          |   |
| 2E-04 |    |       |       |       |       |       |      | 0     | SOM GT:/0:16 0/1:38,8:37C  | T                          |   |
|       |    |       |       |       |       | 5     |      |       | SOM GT:/0:27 0/1:85,24:3G  | A                          |   |
|       |    |       |       |       |       |       |      |       | SOM GT:/0:43 0/1:65,18:3G  | A                          |   |
|       |    | 0.0   | 0.992 | 1.0,D | 1,D   | 3.8   | 5.83 |       | SOM GT:/0:11 0/1:223,24 G  | C                          |   |
| 2E-04 |    |       |       |       |       |       |      |       | SOM GT:/0:21 0/1:40,13:3T  | C                          |   |
|       |    |       |       |       |       |       |      |       | SOM GT:/0:36 0/1:41,8:34G  | C                          |   |
|       |    |       |       |       |       |       |      |       | SOM GT:/0:14 0/1:95,34:3C  | T                          |   |
|       |    | 0.052 | 0.509 | 0.93  |       | 5.8   | 2.26 |       | SOM GT:/0:59 0/1:185,30 C  | T                          |   |
|       |    | 0.0   | 0.225 | 0.957 | 1,D   | 5.9   | 5.10 |       | SOM GT:/0:21 0/1:453,10 C  | T                          |   |
|       |    | 0.0   | 1.0,D | 1.0,D | 1.00  | 5.7   | 5.01 |       | SOM GT:/0:14 0/1:92,15:3C  | T                          |   |
|       |    |       |       |       |       |       |      | 0 0.1 | SOM GT:/0:8,(0/1:33,5:37G  | A                          |   |
|       | ## | ##    | 0     |       |       | 4.5   | 2.74 |       | SOM GT:/0:82 0/1:81,17:3C  | T                          |   |
|       |    |       |       |       |       |       |      |       | SOM GT:/0:10 0/1:219,40 G  | A                          |   |
|       | ## | ##    | 0     | 0.0   | 0.951 | 1.0,D | 1.00 | 5.6   | 4.24                       | SOM GT:/0:19 0/1:267,45 C  | T |
|       |    |       |       |       |       |       |      |       | SOM GT:/0:29 0/1:11,7:37C  | T                          |   |
|       |    |       |       |       |       | 4.6   |      |       | SOM GT:/0:15 0/1:37,7:35A  | T                          |   |
|       |    |       |       |       |       |       |      |       | SOM GT:/0:17 0/1:23,6:24A  | G                          |   |
|       |    |       |       |       | 1,A   | 5.5   | 6.00 |       | SOM GT:/0:28 0/1:44,13:3T  | A                          |   |
|       |    |       |       |       |       |       |      |       | SOM GT:/0:30 0/1:34,5:37T  | G                          |   |
|       |    |       |       |       |       |       |      | 0     | SOM GT:/0:9,(0/1:20,5:22A  | C                          |   |
|       |    |       |       |       |       |       |      | 0     | SOM GT:/0:25 0/1:25,6:20A  | C                          |   |
|       |    |       |       |       |       |       |      |       | SOM GT:/0:19 0/1:25,10:3C  | T                          |   |
|       |    |       |       |       |       |       |      |       | SOM GT:/0:31 0/1:24,8:33T  | A                          |   |
|       |    |       |       |       |       |       |      |       | SOM GT:/0:9,(0/1:6,5:37: C | T                          |   |
|       | ## | ##    | 0     |       |       |       |      |       | SOM GT:/0:58 0/1:49,7:37C  | T                          |   |
|       |    |       |       |       |       |       |      |       | SOM GT:/0:21 0/1:18,7:35C  | T                          |   |
|       |    |       |       |       | 1,D   | 5.6   | 6.86 |       | SOM GT:/0:38 0/1:80,21:3G  | A                          |   |
|       |    |       |       |       |       |       |      |       | SOM GT:/0:59 0/1:36,10:3G  | A                          |   |
|       |    |       |       |       |       |       |      |       | SOM GT:/0:76 0/1:40,8:37A  | C                          |   |
|       |    | 0.0   | 0.998 | 1.0,D | 0.95  | 4.9   | 3.23 |       | SOM GT:/0:40 0/1:88,27:3G  | C                          |   |
|       |    |       |       |       |       |       |      |       | SOM GT:/0:42 0/1:29,7:35T  | C                          |   |
|       |    |       |       |       |       | 1.39  |      |       | SOM GT:/0:17 0/1:23,4:37G  | A                          |   |
| 2E-04 | ## | 0     | 0.0   | 0.754 | 0.988 | 1,D   | 2.5  | 3.43  | 0                          | SOM GT:/0:59 0/1:166,43 C  | T |
|       | ## | 0     |       |       |       |       |      |       |                            | SOM GT:/0:29 0/1:57,12:3C  | T |
|       |    | 0.3   | 0.079 | 0.059 | 0.99  | 4.9   | 1.32 |       |                            | SOM GT:/0:63 0/1:34,10:3T  | C |
|       | 0  | 0     |       |       |       | 4     | 1.94 | 0.1   | 0                          | DB;S GT:/0:43 0/1:38,4:37A | G |
| 2E-04 |    |       |       |       |       |       |      | 0     |                            | SOM GT:/0:57 0/1:47,6:37G  | A |
|       |    | 0.1   | 0.444 | 0.392 | 0.86  | 3.2   | 2.29 |       |                            | SOM GT:/0:15 0/1:315,41 C  | G |
|       | ## | 0     | 0.0   | 0.978 | 0.999 | 1,D   | 5.8  | 4.07  | 0                          | SOM GT:/0:40 0/1:71,8:35C  | T |
|       | 0  | 0     |       |       |       | 1.62  |      |       |                            | SOM GT:/0:16 0/1:30,4:37A  | C |
|       | 0  | 0     |       |       |       |       |      | 0     |                            | SOM GT:/0:43 0/1:101,18 C  | G |
|       |    |       |       |       |       |       |      |       |                            | SOM GT:/0:18 0/1:123,29 G  | A |
|       |    |       |       |       |       |       |      |       |                            | SOM GT:/0:15 0/1:287,60 C  | T |
| 0.04  |    |       |       |       |       |       |      | 0     |                            | SOM GT:/0:39 0/1:66,7:37T  | A |
|       |    |       |       |       |       |       |      | 0     | 0                          | SOM GT:/0:38 0/1:70,8:37A  | G |
|       |    | 0.1   | 0.811 | 0.996 | 0.99  | 2.8   | 2.64 |       |                            | SOM GT:/0:75 0/1:179,31 C  | T |
|       |    |       |       |       |       |       |      | 0     |                            | SOM GT:/0:37 0/1:39,4:37A  | T |
|       | ## | 0     |       |       |       |       |      |       |                            | SOM GT:/0:78 0/1:217,38 C  | T |
| 4E-04 | ## | ##    | 0     |       |       |       |      | 0     | 0                          | SOM GT:/0:10 0/1:63,11:3G  | A |
|       |    |       |       |       |       | 1.69  |      |       |                            | SOM GT:/0:39 0/1:42,10:3T  | C |
|       |    |       |       |       |       |       |      | 0     |                            | SOM GT:/0:90 0/1:59,13:3C  | T |
|       |    |       |       |       |       | 2     | 1.99 |       |                            | SOM GT:/0:19 0/1:24,4:37C  | G |

|       |    |    |   |       |       |       |      |      |                            |                            |                            |   |
|-------|----|----|---|-------|-------|-------|------|------|----------------------------|----------------------------|----------------------------|---|
|       |    |    |   |       |       |       |      |      | SOM GT:/0:11 0/1:140,32 G  | A                          |                            |   |
|       |    | 0  | 0 |       |       |       |      |      | SOM GT:/0:14 0/1:33,4:37 T | C                          |                            |   |
|       |    |    |   |       |       |       |      |      | SOM GT:/0:34 0/1:73,18:3 C | T                          |                            |   |
| 4E-04 | 0  | ## | 0 |       |       |       |      |      | DB;GT:/0:21 0/1:442,88 C   | T                          |                            |   |
|       |    |    |   |       |       |       |      |      | SOM GT:/0:11 0/1:282,54 G  | A                          |                            |   |
|       |    | ## | 0 |       |       |       |      |      | SOM GT:/0:19 0/1:314,13 G  | A                          |                            |   |
|       |    |    |   |       |       |       |      |      | SOM GT:/0:14 0/1:27,4:37 C | T                          |                            |   |
| 2E-04 | ## | ## | 0 | 0.7   | 0.058 | 0.596 | 1,N  |      | SOM GT:/0:25 0/1:102,12 C  | T                          |                            |   |
|       |    |    |   |       |       |       |      |      | SOM GT:/0:45 0/1:50,19:3 C | G                          |                            |   |
|       |    |    |   |       |       |       |      |      | SOM GT:/0:44 0/1:37,12:3 C | G                          |                            |   |
|       |    |    |   |       |       |       |      |      | SOM GT:/0:49 0/1:56,15:3 C | T                          |                            |   |
|       |    |    |   |       |       |       |      |      | SOM GT:/0:47 0/1:49,11:3 C | T                          |                            |   |
|       |    |    |   |       |       |       |      |      | SOM GT:/0:28 0/1:20,4:37 A | C                          |                            |   |
| 2E-04 |    |    |   |       |       | 3.5   | 2.39 | 0    | SOM GT:/0:65 0/1:109,29 C  | T                          |                            |   |
|       |    |    |   |       |       | 3.8   | 2.10 |      | SOM GT:/0:44 0/1:91,21:3 G | A                          |                            |   |
|       |    |    |   |       |       |       |      |      | SOM GT:/0:66 0/1:93,18:3 G | A                          |                            |   |
|       |    |    |   |       |       |       |      |      | SOM GT:/0:62 0/1:90,16:3 G | T                          |                            |   |
|       |    |    |   |       |       |       |      |      | SOM GT:/0:8,(0/1:11,4:37 C | A                          |                            |   |
|       |    |    |   | 0.969 | 1.0,D | 1,D   | 4.3  | 3.43 | SOM GT:/0:36 0/1:60,24:2 C | T                          |                            |   |
|       |    |    |   | 0.1   | 0.018 | 0.018 | 1,N  | 1.37 | SOM GT:/0:60 0/1:104,25 A  | C                          |                            |   |
|       |    |    |   |       |       |       |      |      | SOM GT:/0:20 0/1:26,4:34 C | A                          |                            |   |
|       |    |    |   |       |       |       |      |      | SOM GT:/0:35 0/1:18,6:37 G | C                          |                            |   |
|       |    |    |   |       |       | 1,D   | 4.7  | 11.6 | SOM GT:/0:83 0/1:143,24 G  | A                          |                            |   |
|       |    |    |   | 0.0   | 0.723 | 0.977 | 1,N  | 5.1  | 3.83                       | SOM GT:/0:92 0/1:71,20:3 G | A                          |   |
|       |    |    |   |       |       | 1,D   |      |      |                            | SOM GT:/0:11 0/1:256,35 C  | T                          |   |
|       |    |    |   |       |       |       |      |      |                            | SOM GT:/0:36 0/1:36,4:37 C | A                          |   |
|       |    |    |   |       |       |       |      |      |                            | SOM GT:/0:52 0/1:29,6:35 C | A                          |   |
|       |    | 0  | 0 | 0.0   | 0.931 | 0.999 | 1.00 | 3    | 2.89                       | 0                          | SOM GT:/0:96 0/1:79,17:3 C | T |
|       |    |    |   |       |       |       |      |      |                            | 0                          | SOM GT:/0:9,(0/1:62,14:3 G | A |
|       |    |    |   |       |       |       |      | 0.2  | 0                          | SOM GT:/0:37 0/1:70,9:37 A | G                          |   |
|       |    |    |   |       |       |       |      | 0    | 0                          | SOM GT:/0:12 0/1:25,9:37 A | C                          |   |
| 0.004 |    |    |   |       |       |       |      |      |                            |                            | DB;GT:/0:30 0/1:78,17:3 C  | T |
|       |    |    |   |       |       |       |      | 0.4  | 0.4                        | DB;GT:/0:52 0/1:105,12 A   | G                          |   |
|       |    |    |   |       |       | 1,A   | 3.1  | 4.59 |                            |                            | SOM GT:/0:17 0/1:245,63 C  | T |
|       |    |    |   | 0.1   | 0.036 | 0.104 | 0.94 | 5.4  | 2.06                       |                            | SOM GT:/0:83 0/1:85,21:3 C | T |
|       |    |    |   | 0.0   | 1.0,D | 1.0,D | 0.96 | 3.8  | 2.70                       |                            | SOM GT:/0:44 0/1:72,18:3 G | T |
|       |    |    |   |       |       |       |      |      |                            |                            | SOM GT:/0:16 0/1:29,9:37 T | A |
| 0.437 |    |    |   |       |       |       |      | 0.5  | 0.5                        | DB;GT:/0:53 0/1:16,7:37 T  | C                          |   |
|       |    |    |   |       |       |       |      |      |                            |                            | SOM GT:/0:39 0/1:11,38:3 T | G |
|       |    |    |   |       |       | 3     |      |      | 0                          |                            | SOM GT:/0:11 0/1:237,77 G  | A |
| 0.004 |    | 0  | 0 |       |       |       |      |      |                            |                            | SOM GT:/0:15 0/1:252,22 C  | T |
|       |    |    |   |       |       | 4.6   |      |      |                            |                            | SOM GT:/0:15 0/1:40,7:37 T | A |
|       |    | ## | 0 |       |       |       |      |      |                            |                            | SOM GT:/0:22 0/1:61,16:3 C | T |
|       |    |    |   |       |       | 5.6   |      |      |                            |                            | SOM GT:/0:23 0/1:39,16:3 C | T |
| 0.317 |    |    |   |       |       |       |      | 0    | 0                          | SOM GT:/0:51 0/1:86,10:3 A | T                          |   |
|       |    |    |   |       |       |       |      | 0.1  | 0.1                        | SOM GT:/0:22 0/1:28,5:34 A | C                          |   |
|       |    |    |   |       |       |       |      |      |                            |                            | SOM GT:/0:94 0/1:123,96 C  | A |
|       |    |    |   |       |       |       |      |      |                            |                            | SOM GT:/0:11 0/1:25,4:37 C | T |
|       |    |    |   |       |       |       |      |      |                            |                            | SOM GT:/0:50 0/1:35,21:3 C | T |
|       |    |    |   |       |       |       |      |      |                            |                            | SOM GT:/0:67 0/1:84,60:3 T | G |
|       |    |    |   |       |       |       |      |      |                            |                            | SOM GT:/0:11 0/1:12,8:35 G | T |
|       |    |    |   |       |       |       |      |      |                            |                            | SOM GT:/0:26 0/1:25,22:3 A | T |
|       |    |    |   | 0.0   | 0.857 | 0.993 | 1.00 | 5.4  | 4.17                       |                            | SOM GT:/0:36 0/1:28,21:3 G | A |
|       |    |    |   |       |       |       |      |      |                            |                            | SOM GT:/0:54 0/1:68,38:3 G | A |

|       |    |    |      |       |        |       |       |       |       |      |      |                  |                  |             |   |   |
|-------|----|----|------|-------|--------|-------|-------|-------|-------|------|------|------------------|------------------|-------------|---|---|
| .     | .  | .  | 0.0  | 0.988 | 1.0,D  | 1.00  | 5.1   | 3.49. | .     | SOM  | GT:/ | 0:22             | 0/1:341,19       | C           | T |   |
| .     | .  | .  | .    | .     | .      | .     | .     | .     | .     | SOM  | GT:/ | 0:22             | 0/1:341,19       | C           | T |   |
| .     | .  | .  | 0.0  | 0.999 | 1.0,D  | 1.00  | 3.1   | 3.33. | .     | SOM  | GT:/ | 0:48             | 0/1:43,29:3      | C           | A |   |
| .     | .  | .  | 0.1  | 0.003 | 0.002. | .     | 2.1   | 1.30. | .     | SOM  | GT:/ | 0:56             | 0/1:59,25:3      | G           | T |   |
| .     | .  | .  | .    | .     | .      | .     | .     | .     | .     | SOM  | GT:/ | 0:37             | 0/1:35,14:3      | G           | A |   |
| .     | .  | .  | .    | .     | .      | .     | .     | .     | 0     | 0.1  | SOM  | GT:/             | 0:9,(0/1:17,9:37 | T           | C |   |
| .     | .  | .  | 0.0  | 0.985 | 1.0,D  | 1,D   | 5.5   | 4.92. | .     | SOM  | GT:/ | 0:95             | 0/1:179,16:      | A           | T |   |
| .     | .  | .  | .    | .     | .      | .     | .     | .     | 0     | 0.1  | SOM  | GT:/             | 0:21             | 0/1:34,6:37 | G | T |
| 0.057 | .  | .  | .    | .     | .      | .     | .     | .     | 0     | 0    | DB;S | GT:/             | 0:45             | 0/1:16,17:2 | G | T |
| .     | .  | .  | .    | .     | .      | .     | 1.59. | .     | .     | SOM  | GT:/ | 0:12             | 0/1:8,5:29:      | A           | T |   |
| .     | .  | .  | .    | .     | .      | .     | .     | .     | .     | SOM  | GT:/ | 0:46             | 0/1:34,37:3      | G           | A |   |
| .     | .  | .  | .    | .     | .      | .     | 3.5   | 2.23. | .     | SOM  | GT:/ | 0:28             | 0/1:35,28:3      | C           | A |   |
| .     | .  | .  | .    | .     | .      | .     | .     | .     | .     | SOM  | GT:/ | 0:68             | 0/1:56,28:3      | C           | T |   |
| .     | .  | .  | .    | .     | .      | .     | .     | .     | .     | SOM  | GT:/ | 0:43             | 0/1:25,13:3      | C           | G |   |
| 2E-04 | .  | .  | .    | .     | .      | .     | .     | .     | 0     | 0    | SOM  | GT:/             | 0:12             | 0/1:11,6:37 | G | A |
| .     | .  | .  | .    | .     | .      | .     | 4.7   | 3.12. | .     | SOM  | GT:/ | 0:17             | 0/1:185,13       | G           | A |   |
| .     | .  | .  | .    | .     | .      | .     | .     | .     | .     | SOM  | GT:/ | 0:8,(0/1:11,6:35 | C                | G           |   |   |
| .     | .  | .  | .    | .     | .      | .     | .     | .     | .     | SOM  | GT:/ | 0:12             | 0/1:129,11:      | C           | G |   |
| .     | 0  | ## | 0.   | .     | .      | .     | .     | .     | .     | SOM  | GT:/ | 0:96             | 0/1:181,44       | C           | T |   |
| .     | .  | .  | .    | .     | .      | .     | 2.91. | .     | .     | SOM  | GT:/ | 0:80             | 0/1:93,69:3      | T           | C |   |
| .     | .  | .  | 0.4  | 0.005 | 0.002  | 1,D   | 4.7   | 1.64. | .     | SOM  | GT:/ | 0:60             | 0/1:66,43:3      | A           | G |   |
| .     | .  | .  | .    | .     | .      | .     | 1.87. | .     | .     | SOM  | GT:/ | 0:31             | 0/1:42,9:35      | T           | G |   |
| .     | .  | .  | .    | .     | .      | .     | 1.92. | .     | .     | SOM  | GT:/ | 0:15             | 0/1:29,16:3      | G           | A |   |
| 0.004 | 0  | 0  | 0.   | .     | .      | .     | 4.6.  | .     | 0.    | SOM  | GT:/ | 0:24             | 0/1:415,20:      | C           | T |   |
| .     | .  | ## | 0    | 0.0   | 0.909  | 0.991 | 1,D   | 5.8   | 5.70. | .    | DB;S | GT:/             | 0:28             | 0/1:33,92:3 | G | A |
| .     | .  | .  | .    | .     | .      | .     | .     | .     | .     | SOM  | GT:/ | 0:79             | 0/1:128,27       | T           | G |   |
| .     | .  | .  | .    | .     | .      | .     | .     | .     | 0     | DB;S | GT:/ | 0:55             | 0/1:94,60:3      | C           | T |   |
| .     | .  | .  | .    | .     | .      | .     | 4.1.  | .     | .     | SOM  | GT:/ | 0:30             | 0/1:35,33:3      | C           | T |   |
| .     | .  | .  | .    | .     | .      | .     | .     | .     | 0.    | SOM  | GT:/ | 0:63             | 0/1:77,40:3      | G           | A |   |
| .     | .  | .  | .    | .     | .      | .     | .     | .     | .     | SOM  | GT:/ | 0:19             | 0/1:16,11:3      | G           | T |   |
| .     | .  | .  | .    | .     | .      | .     | .     | .     | .     | SOM  | GT:/ | 0:15             | 0/1:193,56       | G           | C |   |
| .     | .  | .  | .    | .     | .      | .     | .     | .     | .     | SOM  | GT:/ | 0:12             | 0/1:22,5:37      | C           | G |   |
| .     | .  | .  | .    | .     | .      | .     | .     | .     | .     | SOM  | GT:/ | 0:76             | 0/1:53,31:3      | C           | T |   |
| .     | .  | .  | .    | .     | .      | 1,D   | 5.3   | 4.66. | .     | SOM  | GT:/ | 0:16             | 0/1:28,18:3      | G           | A |   |
| .     | .  | .  | .    | .     | .      | .     | 1.74. | .     | .     | SOM  | GT:/ | 0:91             | 0/1:77,44:3      | G           | A |   |
| .     | .  | .  | .    | .     | .      | .     | .     | .     | .     | SOM  | GT:/ | 0:17             | 0/1:23,4:37      | A           | T |   |
| .     | .  | ## | 0    | 0.0   | 0.999  | 1.0,D | 1,N   | 3.2   | 1.65. | .    | SOM  | GT:/             | 0:25             | 0/1:278,17  | C | T |
| .     | .  | .  | .    | .     | .      | .     | .     | .     | .     | SOM  | GT:/ | 0:68             | 0/1:72,39:3      | C           | T |   |
| .     | .  | .  | .    | .     | .      | 1,A   | 5.99. | .     | .     | SOM  | GT:/ | 0:79             | 0/1:65,72:3      | G           | A |   |
| .     | ## | ## | 0    | 0.0   | 0.953  | 1.0,D | 0.87  | 5     | 3.10. | .    | SOM  | GT:/             | 0:12             | 0/1:176,11: | C | T |
| .     | .  | .  | .    | .     | .      | .     | .     | .     | .     | SOM  | GT:/ | 0:20             | 0/1:18,18:3      | C           | T |   |
| .     | .  | 0  | 0    | 0.0   | 0.873  | 0.997 | 0.99  | 5.5   | 3.85. | .    | SOM  | GT:/             | 0:27             | 0/1:39,21:3 | T | G |
| .     | ## | ## | 0.   | .     | .      | .     | .     | .     | .     | SOM  | GT:/ | 0:33             | 0/1:49,30:3      | C           | T |   |
| .     | .  | .  | .    | .     | .      | .     | .     | .     | .     | SOM  | GT:/ | 0:73             | 0/1:72,44:3      | G           | A |   |
| .     | .  | .  | .    | .     | .      | .     | 6     | 4.00. | .     | SOM  | GT:/ | 0:62             | 0/1:68,48:3      | G           | A |   |
| .     | 0  | 0  | 0    | 0.0   | 1.0,D  | 1.0,D | 1.00  | 6     | 5.21. | .    | SOM  | GT:/             | 0:23             | 0/1:247,61  | G | A |
| .     | .  | .  | .    | .     | .      | .     | .     | .     | 0.1   | 0.1  | SOM  | GT:/             | 0:12             | 0/1:5,7:37: | G | C |
| .     | .  | ## | 0.   | .     | .      | .     | .     | .     | .     | SOM  | GT:/ | 0:30             | 0/1:40,21:3      | A           | G |   |
| .     | .  | .  | 0.3  | 0.035 | 0.006  | 0.99. | 1.83. | .     | .     | SOM  | GT:/ | 0:12             | 0/1:148,12:      | T           | C |   |
| .     | .  | .  | .    | .     | .      | .     | .     | .     | 0.1   | 0    | SOM  | GT:/             | 0:13             | 0/1:20,6:37 | G | A |
| .     | .  | .  | .    | .     | .      | .     | .     | .     | 0     | 0    | SOM  | GT:/             | 0:9,(0/1:29,6:35 | C           | T |   |
| .     | .  | .  | .    | .     | .      | .     | .     | .     | .     | SOM  | GT:/ | 0:20             | 0/1:15,16:3      | C           | G |   |
| .     | .  | .  | .    | .     | .      | .     | .     | .     | .     | SOM  | GT:/ | 0:86             | 0/1:95,49:3      | C           | T |   |
| .     | 0  | 0  | 0.1: | .     | 1,N    | .     | .     | .     | 0.    | SOM  | GT:/ | 0:25             | 0/1:488,15:      | G           | A |   |

|       |    |    |       |       |       |       |      |      |                           |                                |   |
|-------|----|----|-------|-------|-------|-------|------|------|---------------------------|--------------------------------|---|
|       |    |    |       |       |       |       |      |      | SOM GT:/0:10 0/1:23,13:3A | C                              |   |
|       | 0  | 0  | 0     |       |       | 2.3   | 1.34 | 0    | 0                         | SOM GT:/0:89 0/1:153,17 A      | T |
|       |    |    |       |       |       |       |      |      |                           | SOM GT:/0:16 0/1:222,14 G      | A |
|       |    |    |       |       |       |       |      |      |                           | SOM GT:/0:23 0/1:30,19:3G      | A |
|       | 0  | 0  |       |       |       |       |      | 0    | 0.2                       | SOM GT:/0:15 0/1:27,4:37C      | A |
|       |    |    |       |       |       |       |      | 0    |                           | SOM GT:/0:13 0/1:22,14:1A      | C |
|       |    |    |       |       |       |       |      |      |                           | SOM GT:/0:16 0/1:37,4:37T      | C |
|       |    |    | 0.0   | 0.997 | 1.0,D | 1,D   | 5.3  | 5.19 |                           | SOM GT:/0:15 0/1:26,21:3G      | A |
| 2E-04 |    |    |       |       |       |       |      |      |                           | SOM GT:/0:9,(0/1:7,6:35: G     | A |
| 0.002 |    |    |       |       |       |       |      |      | 0                         | SOM GT:/0:11 0/1:16,20:3A      | T |
|       | ## | ## | 0     | 0.0   | 0.998 | 1.0,D | 1.00 | 4.8  | 4.42                      | SOM GT:/0:61 0/1:67,7:37C      | T |
|       |    |    |       |       |       |       |      |      |                           | SOM GT:/0:23 0/1:9,17:34G      | A |
|       |    |    |       |       | 1.0,D | 1.0,D | 4.4  | 1.95 |                           | SOM GT:/0:58 0/1:25,67:3G      | A |
|       |    |    |       |       |       |       | 5.6  |      |                           | SOM GT:/0:21 0/1:39,18:3G      | T |
|       |    |    |       |       |       |       | 1.54 |      |                           | SOM GT:/0:8,(0/1:13,14:3T      | C |
|       |    |    |       |       |       |       |      |      | 0                         | SOM GT:/0:10 0/1:5,6:37: G     | T |
|       | ## | 0  |       |       |       |       |      |      |                           | SOM GT:/0:37 0/1:38,11:3G      | A |
|       |    |    | 0.4   | 0.836 | 0.826 | 1,D   | 6.1  | 3.43 |                           | SOM GT:/0:17 0/1:29,13:3A      | G |
| 2E-04 |    |    |       |       |       |       |      |      |                           | SOM GT:/0:27 0/1:32,32:3G      | A |
|       |    |    | 0.0   | 0.017 | 0.002 | 1,D   | 6    | 4.31 |                           | SOM GT:/0:45 0/1:26,18:3G      | T |
|       |    |    |       |       |       |       |      |      | 0.1                       | 0.3 DB;:GT:/0:26 0/1:9,4:37: G | A |
|       |    |    |       |       |       |       |      |      |                           | SOM GT:/0:12 0/1:172,11:C      | T |
|       |    |    |       |       |       |       | 1.27 |      |                           | SOM GT:/0:28 0/1:38,13:3G      | C |
|       |    |    |       |       |       |       |      |      |                           | SOM GT:/0:11 0/1:11,9:37G      | A |
|       | ## | 0  |       |       |       |       |      |      | 0                         | SOM GT:/0:90 0/1:142,86 G      | A |
|       |    |    |       |       |       |       | 2.4  |      |                           | SOM GT:/0:41 0/1:30,23:3C      | T |
|       |    |    |       |       |       |       |      |      |                           | SOM GT:/0:68 0/1:47,48:3G      | A |
|       |    |    |       |       |       |       |      |      | 0                         | SOM GT:/0:23 0/1:19,5:37T      | A |
|       |    |    |       |       |       |       |      |      |                           | SOM GT:/0:8,(0/1:11,8:37C      | T |
|       |    |    |       |       |       |       |      |      | 0                         | 0 SOM GT:/0:19 0/1:8,5:37: G   | T |
|       |    |    |       |       |       |       |      |      | 0                         | SOM GT:/0:8,(0/1:28,6:13A      | T |
|       |    |    | 0.999 | 1.0,D |       |       | 3.3  | 2.24 |                           | SOM GT:/0:11 0/1:25,29:3G      | A |
|       |    |    |       |       |       |       |      |      | 0                         | SOM GT:/0:46 0/1:58,6:37C      | A |
|       |    |    |       |       |       |       | 3.8  | 1.25 |                           | SOM GT:/0:30 0/1:59,6:37A      | T |
|       |    |    |       |       |       |       | 2.3  | 1.46 |                           | SOM GT:/0:68 0/1:38,35:3G      | C |
|       | ## |    |       |       |       |       | 1.76 |      | 0                         | SOM GT:/0:31 0/1:23,20:3A      | G |
|       |    |    | 0.0   | 0.597 | 0.594 | 0.99  | 4.3  | 3.78 |                           | SOM GT:/0:39 0/1:96,16:3G      | A |
|       |    |    |       |       |       |       |      |      |                           | SOM GT:/0:31 0/1:18,19:3C      | G |
|       |    |    |       |       |       |       | 2.7  |      |                           | SOM GT:/0:51 0/1:50,41:3G      | A |
|       |    |    |       |       |       |       |      |      |                           | SOM GT:/0:20 0/1:19,10:3C      | G |
|       |    |    |       |       |       |       |      |      |                           | SOM GT:/0:9,(0/1:9,8:37: C     | A |
|       |    |    |       |       |       |       |      |      |                           | SOM GT:/0:44 0/1:53,98:3G      | A |
|       |    |    |       |       |       |       |      |      | 0.1                       | 0.2 SOM GT:/0:34 0/1:66,8:37C  | A |
|       |    |    |       |       |       |       |      |      | 0                         | 0 SOM GT:/0:48 0/1:39,7:37C    | A |
|       | ## | 0  | 0.0   | 0.002 | 0.003 | 1,N   | 4.5  | 1.47 |                           | SOM GT:/0:19 0/1:175,10:C      | T |
|       | ## |    |       |       |       |       |      |      |                           | DB;:GT:/0:93 0/1:95,73:3C      | T |
|       |    |    |       |       |       | 1,D   | 6    | 3.52 |                           | SOM GT:/0:51 0/1:43,39:3C      | A |
|       |    |    | 0.0   | 1.0,D | 1.0,D | 1,D   | 5.5  | 3.84 |                           | SOM GT:/0:89 0/1:186,46 T      | G |
|       |    |    |       |       |       |       |      |      | 0                         | 0.1 DB;:GT:/0:20 0/1:24,7:33T  | C |
|       |    |    | 0.6   | 0.007 | 0.071 | 1.00  | 5.8  | 1.48 |                           | SOM GT:/0:34 0/1:31,28:3T      | C |
|       |    |    |       |       |       |       |      |      |                           | SOM GT:/0:70 0/1:96,55:3G      | A |
|       |    |    | 0.0   | 1.0,D | 1.0,D | 1,D   | 5.6  | 5.71 |                           | SOM GT:/0:44 0/1:36,26:3G      | A |
|       |    |    |       |       |       |       |      |      |                           | SOM GT:/0:91 0/1:102,54 G      | T |
|       |    |    |       |       |       |       | 1.33 |      |                           | SOM GT:/0:8,(0/1:13,4:37T      | C |

|       |   |    |     |       |        |       |      |      |                               |     |                             |   |
|-------|---|----|-----|-------|--------|-------|------|------|-------------------------------|-----|-----------------------------|---|
|       |   |    |     |       |        |       |      |      | SOM GT:/0:26 0/1:39,14:3 A    | T   |                             |   |
|       |   |    | 0.0 | 0.017 | 0.006  | 1,N   | 1.70 |      | SOM GT:/0:30 0/1:295,22: C    | T   |                             |   |
|       | 0 | ## | 0   |       |        |       |      |      | SOM GT:/0:74 0/1:85,19:3 C    | T   |                             |   |
|       |   |    | 0.0 | 0.526 | 0.73,  | 1,D   | 5.8  | 5.49 | SOM GT:/0:23 0/1:249,56 C     | G   |                             |   |
|       |   |    |     |       |        |       | 4.49 | 0    | 0 DB;S GT:/0:63 0/1:50,30:3 G | A   |                             |   |
|       |   | ## | 0   | 0.0   | 0.982  | 0.999 | 0.99 | 5.6  | 4.76                          | 0   | SOM GT:/0:21 0/1:248,17: G  | A |
|       |   | ## | 0   |       |        | 1,A   | 5.58 |      |                               |     | SOM GT:/0:56 0/1:59,32:3 C  | T |
|       |   |    |     |       |        |       |      |      |                               |     | SOM GT:/0:13 0/1:103,78 G   | A |
| 4E-04 |   | ## | 0   |       |        |       |      | 0    |                               |     | SOM GT:/0:51 0/1:55,34:3 G  | A |
|       |   |    |     |       |        |       | 3.9  | 1.88 |                               |     | SOM GT:/0:46 0/1:57,33:3 A  | G |
|       |   |    |     |       |        |       |      |      |                               |     | SOM GT:/0:45 0/1:50,47:3 G  | T |
| 0.011 | 0 | 0  | 0   |       |        |       | 2.5  |      |                               |     | DB;S GT:/0:12 0/1:211,14: C | T |
|       |   | ## | 0   |       |        |       |      | 0.1  | 0.2                           |     | DB;S GT:/0:22 0/1:57,8:37 T | A |
|       |   |    |     |       |        |       |      |      |                               |     | SOM GT:/0:29 0/1:9,37:35 C  | G |
|       |   |    |     |       |        |       |      |      |                               |     | SOM GT:/0:50 0/1:6,31:37 G  | A |
| 0.021 |   |    |     |       |        |       |      | 0    | 0                             |     | SOM GT:/0:13 0/1:11,4:37 G  | A |
| 2E-04 |   |    |     |       |        |       |      |      |                               |     | SOM GT:/0:10 0/1:5,6:37: C  | T |
|       |   |    |     |       |        |       | 2.9  |      |                               |     | SOM GT:/0:46 0/1:56,30:3 C  | T |
|       |   |    |     |       |        |       |      |      |                               |     | SOM GT:/0:54 0/1:60,45:3 G  | A |
|       |   |    |     |       |        |       |      |      |                               |     | SOM GT:/0:21 0/1:30,6:37 A  | G |
|       |   |    |     |       |        |       |      |      |                               |     | SOM GT:/0:35 0/1:38,31:3 G  | A |
|       |   |    |     |       |        |       |      |      |                               |     | SOM GT:/0:66 0/1:56,37:3 C  | G |
|       |   |    |     |       |        |       |      |      |                               |     | SOM GT:/0:21 0/1:20,20:3 G  | A |
|       |   |    |     |       |        |       |      |      |                               |     | SOM GT:/0:36 0/1:52,13:3 A  | C |
|       |   |    |     |       |        |       |      |      |                               |     | SOM GT:/0:38 0/1:50,24:3 C  | T |
|       |   |    |     |       |        |       |      | 0    |                               |     | SOM GT:/0:23 0/1:27,4:37 C  | G |
| 0.002 |   |    |     |       |        |       |      |      |                               |     | SOM GT:/0:61 0/1:61,41:3 G  | A |
|       |   |    |     |       |        |       | 1.50 |      |                               |     | SOM GT:/0:53 0/1:69,53:3 C  | T |
|       |   |    |     |       |        | 1,A   |      |      |                               |     | SOM GT:/0:26 0/1:53,17:3 G  | A |
|       |   |    |     |       |        |       | 1.84 |      |                               |     | DB;S GT:/0:21 0/1:29,22:3 T | A |
|       |   |    |     |       |        |       |      |      |                               |     | SOM GT:/0:43 0/1:91,38:3 G  | A |
|       |   |    |     |       |        |       |      | 0    | 0.1                           |     | SOM GT:/0:14 0/1:23,4:37 C  | G |
| 0.071 |   |    |     |       |        |       |      | 0.1  | 0.1                           |     | SOM GT:/0:12 0/1:17,11:3 C  | A |
|       |   |    |     |       |        |       |      | 0    | 0                             |     | SOM GT:/0:17 0/1:33,5:37 T  | C |
|       |   |    |     |       |        |       |      |      |                               |     | SOM GT:/0:8,(0/1:9,4:37: G  | T |
|       |   | ## | 0   |       |        |       | 1.27 |      |                               |     | SOM GT:/0:34 0/1:22,24:3 C  | T |
| 2E-04 |   |    |     |       |        |       | 3.3  | 3.26 |                               |     | SOM GT:/0:90 0/1:116,73 C   | T |
|       |   |    | 0.0 | 0.999 | 0.999  | 1,D   | 4.9  | 5.51 |                               |     | SOM GT:/0:89 0/1:116,50 G   | A |
|       |   |    | 0.0 | 0.999 | 1.0,   | D 1,D | 4.2  | 3.76 |                               |     | SOM GT:/0:10 0/1:102,68 G   | A |
|       |   |    |     |       |        |       |      |      | 0.1                           | 0.2 | SOM GT:/0:8,(0/1:24,6:37 G  | A |
|       |   |    |     |       |        |       |      |      | 0                             | 0.1 | SOM GT:/0:34 0/1:41,5:37 A  | G |
|       |   |    |     |       |        |       |      |      |                               |     | SOM GT:/0:50 0/1:33,19:3 C  | A |
|       |   |    |     |       |        |       |      |      |                               |     | SOM GT:/0:80 0/1:95,74:3 T  | C |
|       |   | ## | 0   | 0.0   | 0.186  | 0.958 | 1,N  | 3.7  | 1.71                          |     | SOM GT:/0:63 0/1:75,46:3 C  | T |
|       |   |    |     |       |        |       |      |      |                               |     | SOM GT:/0:42 0/1:41,25:3 C  | T |
|       |   |    |     |       |        |       |      |      |                               |     | SOM GT:/0:16 0/1:30,19:3 C  | T |
|       |   |    |     |       |        |       |      |      | 0                             | 0   | SOM GT:/0:20 0/1:35,4:37 T  | C |
|       |   |    | 0.0 | 1.0,  | D 1.0, | D 1,D | 5.2  | 4.19 |                               |     | SOM GT:/0:48 0/1:44,36:3 C  | T |
|       |   |    |     |       |        |       |      |      |                               |     | SOM GT:/0:45 0/1:26,15:3 G  | A |
|       |   |    |     |       |        |       |      |      |                               |     | SOM GT:/0:26 0/1:28,35:3 C  | T |
|       |   |    |     |       |        |       |      |      |                               |     | SOM GT:/0:46 0/1:55,33:3 C  | T |
|       |   |    |     |       |        |       |      |      | 0                             |     | SOM GT:/0:10 0/1:10,7:37 G  | A |
|       |   |    | 0.1 | 0.928 | 0.999  | 1,N   | 4    | 3.15 |                               |     | SOM GT:/0:15 0/1:248,55 C   | T |
|       | 0 | ## | 0   |       |        |       |      |      | 0                             |     | SOM GT:/0:14 0/1:298,62 G   | A |

|       |   |    |     |       |       |       |      |      |      |                            |                            |   |
|-------|---|----|-----|-------|-------|-------|------|------|------|----------------------------|----------------------------|---|
|       |   |    |     |       | 1,A   | 4.8   | 8.04 |      |      | SOM GT:/0:32 0/1:83,25:3T  | A                          |   |
|       |   | ## | 0   |       |       |       | 1.66 |      |      | SOM GT:/0:18 0/1:47,8:37C  | T                          |   |
|       |   | ## | 0   |       |       |       |      |      |      | SOM GT:/0:29 0/1:304,33 G  | A                          |   |
|       |   |    |     |       |       |       | 1.72 |      |      | SOM GT:/0:16 0/1:31,10:3G  | A                          |   |
|       |   |    | 0.6 | 0.005 | 0.001 | 0.98  | 3.8  | 1.70 |      | SOM GT:/0:33 0/1:44,9:37G  | T                          |   |
|       |   |    |     |       |       |       |      |      |      | SOM GT:/0:24 0/1:65,19:3G  | C                          |   |
|       |   |    |     |       |       |       |      |      |      | SOM GT:/0:34 0/1:40,23:3G  | T                          |   |
|       |   |    | 0.0 | 0.982 | 0.999 | 1,D   | 4.2  | 5.24 |      | SOM GT:/0:22 0/1:279,77 G  | A                          |   |
|       |   |    |     |       |       |       |      | 0    | 0    | DB;S GT:/0:25 0/1:30,5:37T | G                          |   |
|       |   |    |     |       |       |       |      | 0    | 0    | SOM GT:/0:27 0/1:44,5:37C  | T                          |   |
|       |   |    |     |       |       |       |      | 0.1  | 0.3  | SOM GT:/0:9,(0/1:32,4:37C  | T                          |   |
|       |   |    |     |       |       |       |      | 0    | 0    | SOM GT:/0:10 0/1:30,5:37A  | G                          |   |
|       |   |    |     |       |       |       |      |      |      | SOM GT:/0:35 0/1:47,8:3G   | T                          |   |
|       |   |    |     |       |       |       | 1.68 | 0    |      | SOM GT:/0:22 0/1:70,11:1T  | G                          |   |
|       |   | ## | 0   |       |       |       |      |      |      | SOM GT:/0:31 0/1:518,47 C  | T                          |   |
|       |   | ## | 0   | 0.0   | 1.0,D | 1.0,D | 1,D  | 2.7  | 3.85 | SOM GT:/0:23 0/1:42,10:3C  | T                          |   |
|       |   |    |     |       |       |       | 4.5  |      |      | SOM GT:/0:12 0/1:130,17 G  | A                          |   |
|       |   |    |     |       |       |       | 1.48 |      |      | SOM GT:/0:78 0/1:99,17:3A  | C                          |   |
|       |   | ## | 0   |       |       |       |      |      |      | SOM GT:/0:23 0/1:26,11:3C  | T                          |   |
| 0.01  | 0 | 0  | 0   | 0.0   | 0.17, | 0.899 | 0.99 | 4    | 3.11 | 0                          | DB;S GT:/0:16 0/1:125,40 C | T |
|       |   |    |     |       |       |       |      |      |      |                            | SOM GT:/0:35 0/1:53,5:37A  | G |
|       |   |    |     |       |       |       |      |      |      |                            | SOM GT:/0:41 0/1:72,20:3C  | A |
|       |   |    | 0.0 | 0.996 | 1.0,D | 1,D   | 5.7  | 5.49 |      |                            | SOM GT:/0:34 0/1:107,13 C  | T |
|       |   |    | 0.2 | 0.005 | 0.001 | 1.00  |      |      |      |                            | SOM GT:/0:56 0/1:49,7:37T  | A |
|       |   |    | 0.0 | 0.999 | 1.0,D | 1,D   | 5.8  | 4.83 |      |                            | SOM GT:/0:17 0/1:120,57 C  | T |
| 0.016 |   |    |     |       |       |       |      |      |      |                            | DB;S GT:/0:25 0/1:25,7:37T | C |
|       |   |    |     |       |       |       |      | 0    |      |                            | SOM GT:/0:27 0/1:34,5:31A  | G |
|       |   |    |     |       |       |       | 3.4  |      |      |                            | SOM GT:/0:26 0/1:30,6:37C  | G |
|       |   |    |     |       |       |       |      |      |      |                            | SOM GT:/0:18 0/1:21,7:17T  | G |
|       |   |    |     |       |       |       |      | 0    | 0.1  |                            | SOM GT:/0:9,(0/1:13,4:34G  | A |
|       |   |    |     |       |       |       |      |      |      |                            | SOM GT:/0:25 0/1:82,16:3G  | C |
|       |   |    |     |       |       |       | 2.50 |      |      |                            | SOM GT:/0:11 0/1:130,18 G  | A |
|       |   |    | 0.0 | 0.936 | 0.997 | 1.00  | 5.9  | 4.12 |      |                            | SOM GT:/0:62 0/1:73,26:3G  | A |
|       |   |    |     |       |       |       | 4.1  |      |      |                            | SOM GT:/0:45 0/1:56,14:3G  | C |
|       |   |    |     |       |       |       | 2.7  | 2.12 |      |                            | SOM GT:/0:79 0/1:85,20:3C  | A |
|       |   |    |     |       |       |       | 2.5  |      |      |                            | SOM GT:/0:12 0/1:223,76 T  | A |
|       |   |    | 1.0 | 0.0,B | 0.0,B | 1,N   |      |      |      |                            | SOM GT:/0:31 0/1:55,20:3G  | T |
|       |   | ## | 0   | 0.0   | 0.004 | 0.313 | 0.99 | 2.5  | 2.21 |                            | SOM GT:/0:14 0/1:150,34 C  | T |
|       |   |    |     |       |       |       | 2.3  | 1.83 |      |                            | SOM GT:/0:28 0/1:25,5:34T  | A |
|       |   |    | 0.0 | 0.054 | 0.665 | 1.00  | 4.9  | 1.86 |      |                            | SOM GT:/0:14 0/1:112,15 G  | A |
|       |   |    |     |       |       |       |      | 0    | 0    |                            | DB;S GT:/0:26 0/1:18,5:37T | C |
|       |   |    |     |       |       |       |      |      |      |                            | SOM GT:/0:40 0/1:36,10:3C  | G |
|       |   |    |     |       |       |       |      |      |      |                            | SOM GT:/0:31 0/1:35,5:31G  | C |
|       |   |    |     |       |       |       | 5    |      |      |                            | SOM GT:/0:16 0/1:107,56 C  | T |
|       |   |    | 0.0 |       |       | 0.98  |      | 2.98 |      |                            | SOM GT:/0:14 0/1:163,70 A  | T |
|       |   |    | 0.9 | 0.99, | 0.999 | 1.00  | 5.8  | 1.57 |      |                            | SOM GT:/0:76 0/1:86,17:3T  | C |
|       |   |    |     |       |       |       |      |      |      |                            | SOM GT:/0:70 0/1:154,57 T  | C |
|       |   |    |     |       |       | 1,A   | 5.9  | 13.3 |      |                            | SOM GT:/0:43 0/1:94,22:3G  | A |
|       |   |    |     |       |       | 1,D   |      | 2.38 |      |                            | SOM GT:/0:48 0/1:60,6:37C  | T |
|       |   |    |     |       |       |       |      |      |      |                            | SOM GT:/0:53 0/1:100,10 C  | T |
|       |   |    |     |       |       |       | 1.26 | 0    |      |                            | SOM GT:/0:10 0/1:21,7:11A  | C |
|       |   |    |     |       |       |       |      | 0.3  | 0.2  |                            | SOM GT:/0:8,(0/1:20,8:3E G | A |
|       |   |    |     |       |       |       | 2.1  |      |      |                            | SOM GT:/0:20 0/1:77,7:37G  | A |
| 0.327 |   |    |     |       |       |       |      | 0    |      |                            | DB;S GT:/0:19 0/1:26,5:37T | A |

|         |   |       |                                   |                |                           |         |                           |                           |   |
|---------|---|-------|-----------------------------------|----------------|---------------------------|---------|---------------------------|---------------------------|---|
| .       | . | .     | .                                 | .              | .                         | .       | .                         | SOMGT:/0:35 0/1:38,10:3 C | A |
| .       | . | ##    | 0 0.910.008 0.025 0.97 4.8 .      | .              | .                         | .       | .                         | SOMGT:/0:48 0/1:70,25:3 A | G |
| .       | . | .     | .                                 | .              | .                         | .       | .                         | SOMGT:/0:27 0/1:36,10:3 G | A |
| .       | . | ##    | 0 0.1 0.003 0.019 1,N .           | .              | .                         | .       | .                         | SOMGT:/0:52 0/1:132,13 C  | T |
| .       | . | .     | .                                 | .              | .                         | .       | .                         | SOMGT:/0:53 0/1:54,11:3 C | A |
| .       | . | .     | .                                 | .              | 3.00 .                    | .       | .                         | SOMGT:/0:11 0/1:78,15:3 C | T |
| .       | . | .     | .                                 | .              | .                         | .       | .                         | SOMGT:/0:81 0/1:91,33:3 C | T |
| .       | . | .     | .                                 | .              | .                         | .       | .                         | SOMGT:/0:22 0/1:43,25:3 G | A |
| .       | . | ##    | 0 0.110.105 0.205 1.00 5.1 3.30 . | .              | .                         | .       | .                         | SOMGT:/0:57 0/1:90,13:3 G | A |
| .       | . | .     | .                                 | .              | 3.7 .                     | .       | .                         | SOMGT:/0:14 0/1:364,68 C  | T |
| .       | . | .     | 0.2 0.087 0.358 1,N .             | .              | .                         | .       | .                         | SOMGT:/0:17 0/1:152,46 T  | G |
| .       | . | .     | .                                 | .              | .                         | .       | .                         | SOMGT:/0:19 0/1:25,7:3E A | G |
| .       | . | .     | 0.0 0.872 0.983 0.88 4.2 3.66 .   | .              | .                         | .       | .                         | SOMGT:/0:11 0/1:91,26:3 C | T |
| .       | . | .     | .                                 | .              | .                         | 0.1 0.2 | SOMGT:/0:37 0/1:30,7:37 C | A                         |   |
| .       | . | .     | .                                 | .              | .                         | 0 0.1   | SOMGT:/0:15 0/1:8,5:37: G | T                         |   |
| .       | . | .     | 0.0 .                             | 1,D 4.6 1.63 . | .                         | .       | SOMGT:/0:58 0/1:96,19:3 G | A                         |   |
| .       | . | .     | 0.0 0.554 0.927 1.00 5.1 4.23 .   | .              | .                         | .       | SOMGT:/0:32 0/1:52,6:37 C | G                         |   |
| .       | . | ##    | 0 0.210.004 0.012 1,N .           | .              | .                         | .       | SOMGT:/0:19 0/1:111,33 C  | T                         |   |
| .       | . | .     | .                                 | .              | .                         | .       | SOMGT:/0:44 0/1:75,22:3 G | C                         |   |
| 0.318 . | . | .     | .                                 | .              | .                         | 0.1 0.2 | SOMGT:/0:23 0/1:27,6:37 C | A                         |   |
| 0.291 . | . | .     | .                                 | .              | .                         | 0.3 0.6 | SOMGT:/0:9,(0/1:14,4:37 A | C                         |   |
| .       | . | 0 0 . | .                                 | 3.2 2.71 .     | .                         | .       | SOMGT:/0:28 0/1:106,13 C  | T                         |   |
| .       | . | .     | 0.0 0.993 0.999 0.99 4.6 2.87 .   | .              | .                         | .       | SOMGT:/0:11 0/1:176,34 C  | A                         |   |
| .       | . | .     | .                                 | .              | .                         | .       | SOMGT:/0:9,(0/1:16,5:37 A | T                         |   |
| .       | . | .     | .                                 | 3.11 .         | .                         | .       | SOMGT:/0:28 0/1:40,14:3 G | T                         |   |
| .       | . | .     | .                                 | .              | .                         | .       | SOMGT:/0:29 0/1:16,6:37 G | A                         |   |
| .       | . | .     | .                                 | 3.37 .         | .                         | .       | SOMGT:/0:10 0/1:86,28:3 G | A                         |   |
| .       | . | .     | 0.0 0.499 0.883 1.00 4.7 4.04 .   | .              | .                         | .       | SOMGT:/0:38 0/1:52,17:3 C | G                         |   |
| .       | . | ##    | 0.3 0.002 0.002 0.97 .            | 1.77 .         | .                         | .       | SOMGT:/0:40 0/1:53,17:3 G | C                         |   |
| .       | . | ##    | 0 0.1 0.014 0.087 0.98 4.1 1.73 . | .              | .                         | .       | SOMGT:/0:83 0/1:189,17 C  | T                         |   |
| .       | . | .     | 0.0 0.996 0.999 1.00 4.1 4.31 .   | .              | .                         | .       | SOMGT:/0:13 0/1:9,4:30: G | A                         |   |
| .       | . | .     | 0.0 0.999 1.0,D 1,D 4.8 5.03 .    | .              | .                         | .       | SOMGT:/0:20 0/1:243,39 C  | T                         |   |
| .       | . | .     | .                                 | .              | .                         | .       | SOMGT:/0:9,(0/1:23,8:37 G | A                         |   |
| .       | . | .     | .                                 | .              | .                         | .       | SOMGT:/0:22 0/1:48,17:3 G | T                         |   |
| .       | . | .     | .                                 | .              | .                         | 0 .     | SOMGT:/0:12 0/1:147,35 C  | T                         |   |
| .       | . | .     | .                                 | .              | .                         | .       | SOMGT:/0:13 0/1:16,7:37 C | A                         |   |
| .       | . | .     | .                                 | 2 .            | .                         | .       | SOMGT:/0:23 0/1:13,6:37 C | G                         |   |
| .       | . | .     | .                                 | 2.5 2.83 .     | .                         | .       | SOMGT:/0:11 0/1:82,23:3 C | T                         |   |
| .       | . | .     | .                                 | .              | .                         | .       | SOMGT:/0:28 0/1:15,10:3 G | C                         |   |
| .       | . | .     | .                                 | 2.9 .          | .                         | .       | SOMGT:/0:21 0/1:182,17 C  | T                         |   |
| .       | . | .     | .                                 | .              | .                         | .       | SOMGT:/0:33 0/1:51,12:3 A | G                         |   |
| .       | . | .     | .                                 | 1.29 0.5 0.5   | SOMGT:/0:13 0/1:29,10:3 G | A       | A                         |                           |   |
| .       | . | .     | .                                 | .              | .                         | .       | SOMGT:/0:55 0/1:82,117 G  | A                         |   |





|   |    |             |     |       |          |          |          |                          |   |
|---|----|-------------|-----|-------|----------|----------|----------|--------------------------|---|
| 0 | 0. | NA          | .   | .     | .        | .        | .        | .                        | . |
| 0 | 0. | NA          | .   | .     | .        | .        | .        | .                        | . |
| 0 | 0. | NA          | .   | .     | .        | .        | .        | .                        | . |
| 0 | 0. | NA          | .   | .     | .        | KEC.     | .        | REACTOME_METABOLISM_OF_  | . |
| 0 | 0  | Mowat-Wil   | NA  | .     | .        | .        | .        | .                        | . |
| 0 | 0. | NA          | .   | CELI  | NUC.     | .        | PID.     | .                        | . |
| 0 | 0. | NA          | .   | RNA   | ORGLIGA  | KEC.     | .        | REACTOME_MITOCHONDRIAL_  | . |
| 0 | 0. | NA          | .   | .     | .        | .        | .        | .                        | . |
| 0 | 0. | NA          | .   | .     | INTRG_PF | KEC.     | .        | REACTOME_SIGNALING_BY_G  | . |
| 0 | 0  | Spinal mus  | NA  | .     | PRO.     | UNFC.    | .        | .                        | . |
| 0 | 0. | NA          | .   | .     | .        | .        | .        | .                        | . |
| 0 | 0. | NA          | .   | RNA   | .        | TRAN.    | PID.     | .                        | . |
| 0 | 0. | NA          | .   | .     | .        | .        | .        | .                        | . |
| 0 | 0. | NA          | .   | N_TI  | NUC HIST | (KEC     | PID, BIO | REACTOME_PRE_NOTCH_TRA   | . |
| 0 | 0  | Nail disord | NA  | .     | MEM      | CYT(LIPA | KEC.     | .                        | . |
| 0 | 0. | NA          | .   | EST)  | .        | .        | .        | .                        | . |
| 0 | 0. | NA          | CM1 | EST)  | .        | .        | .        | .                        | . |
| 0 | 0. | NA          | .   | .     | .        | .        | .        | .                        | . |
| 0 | 0. | NA          | .   | .     | .        | .        | .        | .                        | . |
| 0 | 0. | NA          | .   | .     | .        | .        | .        | .                        | . |
| 0 | 0. | NA          | .   | REG.  | .        | KEC.     | .        | .                        | . |
| 0 | 0. | NA          | .   | .     | .        | .        | .        | .                        | . |
| 0 | 0. | NA          | .   | .     | .        | .        | .        | .                        | . |
| 0 | 0. | NA          | .   | .     | .        | .        | .        | .                        | . |
| 0 | 0. | NA          | .   | .     | .        | .        | .        | .                        | . |
| 0 | 0. | NA          | .   | .     | .        | .        | .        | .                        | . |
| 0 | 0. | NA          | .   | .     | .        | .        | .        | .                        | . |
| 0 | 0. | NA          | .   | .     | .        | .        | .        | .                        | . |
| 0 | 0. | NA          | .   | .     | .        | .        | .        | .                        | . |
| 0 | 0. | NA          | .   | .     | .        | .        | .        | .                        | . |
| 0 | 0. | NA          | .   | .     | .        | .        | .        | .                        | . |
| 0 | 0. | NA          | .   | .     | .        | .        | .        | .                        | . |
| 0 | 0. | NA          | .   | .     | .        | .        | .        | .                        | . |
| 0 | 0. | NA          | .   | .     | .        | .        | .        | .                        | . |
| 0 | 0. | NA          | .   | .     | .        | .        | .        | .                        | . |
| 0 | 0. | NA          | .   | .     | .        | .        | .        | .                        | . |
| 0 | 0. | NA          | .   | .     | .        | .        | .        | REACTOME_METABOLISM_OF_  | . |
| 0 | 0. | NA          | .   | .     | .        | KEC.     | .        | .                        | . |
| 0 | 0. | NA          | .   | .     | .        | .        | .        | .                        | . |
| 0 | 0. | NA          | .   | BIOF. | .        | KEC      | PID, BIO | REACTOME_SIGNALLING_BY_I | . |
| 0 | 0. | NA          | .   | CELI  | PRO PRO  | KEC      | PID, BIO | REACTOME_SIGNALING_BY_W  | . |
| 0 | 0. | NA          | .   | .     | .        | .        | .        | .                        | . |
| 0 | 0. | NA          | .   | .     | .        | .        | .        | .                        | . |
| 0 | 0. | NA          | .   | .     | .        | .        | .        | .                        | . |
| 0 | 0. | NA          | .   | .     | .        | .        | .        | .                        | . |
| 0 | 0. | NA          | .   | COF.  | .        | KEC.     | .        | REACTOME_BIOLOGICAL_OXID | . |
| 0 | 0. | NA          | .   | .     | .        | .        | .        | .                        | . |
| 0 | 0. | NA          | .   | .     | .        | .        | .        | .                        | . |
| 0 | 0. | NA          | .   | .     | .        | .        | .        | .                        | . |
| 0 | 0. | NA          | .   | .     | .        | .        | .        | .                        | . |
| 0 | 0  | Coenzyme    | NA  | .     | ISOF.    | TRAN     | KEC.     | .                        | . |
| 0 | 0. | NA          | .   | .     | .        | .        | .        | .                        | . |
| 0 | 0. | NA          | .   | .     | .        | .        | .        | .                        | . |
| 0 | 0. | NA          | .   | .     | .        | .        | .        | REACTOME_TRANSMEMBRANI   | . |



|   |    |              |    |                |           |      |      |      |                          |
|---|----|--------------|----|----------------|-----------|------|------|------|--------------------------|
| 0 | 0. | NA           | .  | .              | .         | .    | .    | .    | .                        |
| 0 | 0. | NA           | .  | .              | .         | .    | .    | .    | .                        |
| 0 | 0. | NA           | .  | .              | .         | .    | .    | .    | .                        |
| 0 | 0  | ?Retinitis p | NA | .              | LIPII     | .    | .    | .    | .                        |
| 0 | 0. | NA           | .  | .              | .         | .    | .    | .    | .                        |
| 0 | 0. | NA           | .  | .              | .         | .    | .    | .    | .                        |
| 0 | 0. | NA           | .  | .              | .         | .    | .    | .    | .                        |
| 0 | 0  | Preeclamp    | NA | .              | .         | .    | .    | .    | .                        |
| 0 | 0. | NA           | .  | .              | .         | .    | .    | .    | .                        |
| 0 | 0  | Cholestery   | NA | .              | GLY(CYT(  | .    | KEC. | .    | .                        |
| 0 | 0. | NA           | .  | .              | .         | .    | .    | .    | .                        |
| 0 | 0  | Epidermoly   | NA | .              | SYS INTR. | .    | PID. | .    | REACTOME_CELL_CELL_COMI  |
| 0 | 0. | NA           | .  | .              | .         | .    | .    | .    | .                        |
| 0 | 0. | NA           | .  | .              | .         | .    | .    | .    | .                        |
| 0 | 0. | NA           | .  | .              | .         | .    | .    | .    | .                        |
| 0 | 0. | NA           | .  | PRO.           | ACID      | KEC  | PID  | BIO( | REACTOME_SIGNALLING_BY_I |
| 0 | 0. | NA           | .  | .              | .         | .    | .    | .    | .                        |
| 0 | 0. | NA           | .  | .              | .         | .    | .    | .    | .                        |
| 0 | 0. | NA           | .  | SIGN.          | .         | .    | .    | .    | .                        |
| 0 | 0. | NA           | .  | RNA NUC.       | .         | .    | .    | .    | .                        |
| 0 | 0. | NA           | .  | RNA NUC.       | .         | .    | .    | .    | .                        |
| 0 | 0. | NA           | .  | .              | .         | .    | .    | .    | .                        |
| 0 | 0. | NA           | .  | .              | .         | .    | .    | .    | .                        |
| 0 | 0. | NA           | .  | ENZ' CYT(NUCL. | .         | PID. | .    | .    | .                        |
| 0 | 0. | NA           | .  | .              | .         | .    | KEC. | .    | REACTOME_SIGNALING_BY_G  |
| 0 | 0. | NA           | .  | .              | .         | .    | .    | .    | .                        |
| 0 | 0. | NA           | .  | .              | .         | .    | .    | .    | .                        |
| 0 | 0. | NA           | .  | .              | .         | .    | .    | .    | .                        |
| 0 | 0. | NA           | .  | REG SYN.       | .         | PID. | .    | .    | .                        |
| 0 | 0. | NA           | .  | .              | .         | .    | .    | .    | .                        |
| 0 | 0. | NA           | .  | .              | .         | .    | .    | .    | REACTOME_TRANSMISSION_A  |
| 0 | 0. | NA           | .  | .              | .         | .    | .    | .    | .                        |
| 0 | 0. | NA           | .  | .              | .         | .    | .    | .    | .                        |
| 0 | 0. | NA           | .  | SULF.          | SULF      | KEC. | .    | .    | REACTOME_CHONDROITIN_SL  |
| 0 | 0. | NA           | .  | .              | .         | .    | .    | .    | .                        |
| 0 | 0. | NA           | .  | SYS'           | PHOS.     | PID. | .    | .    | .                        |
| 0 | 0. | NA           | .  | .              | .         | .    | .    | .    | .                        |
| 0 | 0. | NA           | .  | .              | .         | .    | .    | .    | .                        |
| 0 | 0. | NA           | .  | .              | .         | .    | .    | .    | .                        |
| 0 | 0. | NA           | .  | .              | .         | .    | .    | .    | .                        |
| 0 | 0. | NA           | .  | .              | .         | .    | .    | .    | .                        |
| 0 | 0. | NA           | .  | .              | .         | .    | .    | .    | .                        |
| 0 | 0. | NA           | .  | .              | .         | .    | .    | .    | .                        |
| 0 | 0. | NA           | .  | .              | .         | .    | .    | .    | .                        |
| 0 | 0. | NA           | .  | .              | .         | .    | .    | .    | .                        |
| 0 | 0  | Emery-Dre    | NA | .              | .         | .    | .    | .    | REACTOME_MEIOSIS;REACTO  |
| 0 | 0. | NA           | .  | .              | .         | .    | .    | .    | .                        |
| 0 | 0. | NA           | .  | .              | .         | .    | .    | .    | .                        |

|   |    |                  |          |        |       |   |   |   |                         |
|---|----|------------------|----------|--------|-------|---|---|---|-------------------------|
| 0 | 0. | NA .             | .        | .      | .     | . | . | . | .                       |
| 0 | 0. | NA .             | .        | .      | .     | . | . | . | .                       |
| 0 | 0. | NA .             | .        | .      | .     | . | . | . | .                       |
| 0 | 0. | NA .             | .        | .      | .     | . | . | . | .                       |
| 0 | 0. | NA .             | .        | .      | .     | . | . | . | .                       |
| 0 | 0. | NA .             | .        | .      | .     | . | . | . | .                       |
| 0 | 0. | NA .             | .        | .      | .     | . | . | . | .                       |
| 0 | 0. | NA .             | .        | .      | .     | . | . | . | .                       |
| 0 | 0. | NA .             | .        | .      | .     | . | . | . | .                       |
| 0 | 0. | NA .             | .        | .      | .     | . | . | . | .                       |
| 0 | 0. | NA .             | .        | .      | .     | . | . | . | .                       |
| 0 | 0. | NA .             | .        | .      | .     | . | . | . | .                       |
| 0 | 0. | NA .             | .        | .      | .     | . | . | . | REACTOME_TRANSMEMBRANI  |
| 0 | 0. | NA .             | SYS .    | .      | .     | . | . | . | .                       |
| 0 | 0. | NA .             | .        | .      | .     | . | . | . | .                       |
| 0 | 0. | NA .             | .        | .      | .     | . | . | . | .                       |
| 0 | 0. | NA .             | .        | .      | .     | . | . | . | .                       |
| 0 | 0. | NA .             | .        | .      | .     | . | . | . | .                       |
| 0 | 0. | NA .             | .        | .      | .     | . | . | . | .                       |
| 0 | 0. | NA .             | .        | .      | .     | . | . | . | .                       |
| 0 | 0. | NA .             | .        | .      | .     | . | . | . | .                       |
| 0 | 0. | NA .             | .        | .      | .     | . | . | . | .                       |
| 0 | 0. | NA .             | SIGN .   | GTPA . | .     | . | . | . | REACTOME_SIGNALING_BY_G |
| 0 | 0  | Deafness, NA .   | .        | .      | .     | . | . | . | .                       |
| 0 | 0  | Immunode NA .    | ORGSTR . | .      | .     | . | . | . | .                       |
| 0 | 0. | NA .             | .        | .      | .     | . | . | . | .                       |
| 0 | 0. | NA .             | .        | .      | .     | . | . | . | .                       |
| 0 | 0. | NA .             | .        | .      | .     | . | . | . | .                       |
| 0 | 0. | NA .             | .        | .      | .     | . | . | . | .                       |
| 0 | 0. | NA .             | .        | .      | .     | . | . | . | .                       |
| 0 | 0. | NA .             | .        | .      | .     | . | . | . | .                       |
| 0 | 0. | NA .             | .        | .      | .     | . | . | . | .                       |
| 0 | 0. | NA .             | .        | .      | .     | . | . | . | .                       |
| 0 | 0. | NA .             | .        | .      | .     | . | . | . | .                       |
| 0 | 0. | NA .             | .        | .      | .     | . | . | . | .                       |
| 0 | 0. | NA .             | .        | .      | .     | . | . | . | .                       |
| 0 | 0. | NA .             | .        | .      | .     | . | . | . | .                       |
| 0 | 0. | NA .             | .        | .      | .     | . | . | . | .                       |
| 0 | 0. | NA .             | .        | .      | .     | . | . | . | .                       |
| 0 | 0. | NA .             | .        | .      | .     | . | . | . | .                       |
| 0 | 0. | NA .             | .        | .      | .     | . | . | . | .                       |
| 0 | 0  | Growth ret: NA . | PAT .    | .      | .     | . | . | . | .                       |
| 0 | 0  | Myeloid let NA . | RNA .    | RNA_ . | PID . | . | . | . | .                       |

|   |   |              |    |   |         |            |      |                         |                          |
|---|---|--------------|----|---|---------|------------|------|-------------------------|--------------------------|
| 0 | 0 | NA           | .  | . | .       | .          | .    | .                       | .                        |
| 0 | 0 | Brittle corn | NA | . | .       | .          | .    | .                       | .                        |
| 0 | 0 | Retinitis p  | NA | . | RNA     | ORGRNA_KEC | .    | REACTOME_PROCESSING_OF  | .                        |
| 0 | 0 |              | NA | . | .       | .          | .    | .                       | .                        |
| 0 | 0 |              | NA | . | RNA     | HYDF       | PID  | .                       | .                        |
| 0 | 0 |              | NA | . | GAMORG  | .          | .    | .                       | .                        |
| 0 | 0 |              | NA | . | .       | .          | .    | .                       | .                        |
| 0 | 0 | Deafness,    | NA | . | SEN     | .          | .    | .                       | .                        |
| 0 | 0 |              | NA | . | .       | .          | .    | .                       | .                        |
| 0 | 0 |              | NA | . | .       | .          | .    | .                       | .                        |
| 0 | 0 |              | NA | . | .       | .          | .    | .                       | .                        |
| 0 | 0 |              | NA | . | .       | .          | .    | .                       | .                        |
| 0 | 0 |              | NA | . | .       | .          | .    | .                       | .                        |
| 0 | 0 |              | NA | . | .       | .          | .    | .                       | .                        |
| 0 | 0 |              | NA | . | .       | .          | .    | .                       | .                        |
| 0 | 0 |              | NA | . | .       | .          | .    | .                       | .                        |
| 0 | 0 |              | NA | . | CELI    | HYDF       | .    | .                       | .                        |
| 0 | 0 | Cortical dy  | NA | . | MICFORG | STRU       | PID  | REACTOME_CELL_CYCLE;REA | .                        |
| 0 | 0 |              | NA | . | .       | .          | .    | .                       | .                        |
| 0 | 0 |              | NA | . | .       | .          | .    | .                       | .                        |
| 0 | 0 | Amelogen     | NA | . | RNA     | ENZYKEC    | PID  | BIO                     | REACTOME_SIGNALLING_BY_I |
| 0 | 0 |              | NA | . | .       | .          | .    | .                       | .                        |
| 0 | 0 |              | NA | . | CELI    | KEC        | .    | .                       | .                        |
| 0 | 0 |              | NA | . | .       | .          | .    | .                       | .                        |
| 0 | 0 |              | NA | . | .       | .          | .    | .                       | .                        |
| 0 | 0 |              | NA | . | .       | .          | .    | .                       | .                        |
| 0 | 0 |              | NA | . | .       | .          | .    | .                       | .                        |
| 0 | 0 |              | NA | . | .       | .          | .    | .                       | .                        |
| 0 | 0 |              | NA | . | .       | .          | .    | .                       | .                        |
| 0 | 0 |              | NA | . | .       | .          | .    | .                       | .                        |
| 0 | 0 |              | NA | . | .       | .          | .    | .                       | .                        |
| 0 | 0 |              | NA | . | .       | .          | .    | .                       | .                        |
| 0 | 0 |              | NA | . | .       | .          | .    | .                       | .                        |
| 0 | 0 |              | NA | . | .       | .          | .    | .                       | .                        |
| 0 | 0 |              | NA | . | .       | .          | .    | .                       | .                        |
| 0 | 0 |              | NA | . | .       | .          | .    | .                       | .                        |
| 0 | 0 |              | NA | . | .       | .          | .    | .                       | .                        |
| 0 | 0 |              | NA | . | .       | .          | .    | .                       | .                        |
| 0 | 0 |              | NA | . | .       | .          | .    | .                       | .                        |
| 0 | 0 |              | NA | . | .       | .          | .    | .                       | .                        |
| 0 | 0 |              | NA | . | DNA     | NUC        | .    | .                       | .                        |
| 0 | 0 |              | NA | . | CAR     | INTR       | TRAN | KEC                     | REACTOME_BIOLOGICAL_OXII |
| 0 | 0 |              | NA | . | .       | .          | .    | .                       | .                        |
| 0 | 0 |              | NA | . | .       | .          | .    | .                       | .                        |
| 0 | 0 |              | NA | . | .       | .          | .    | .                       | .                        |
| 0 | 0 |              | NA | . | .       | .          | .    | .                       | .                        |
| 0 | 0 |              | NA | . | .       | .          | .    | .                       | .                        |
| 0 | 0 |              | NA | . | .       | .          | .    | .                       | .                        |
| 0 | 0 |              | NA | . | .       | .          | .    | .                       | .                        |
| 0 | 0 |              | NA | . | .       | .          | .    | .                       | .                        |
| 0 | 0 |              | NA | . | .       | .          | .    | .                       | .                        |
| 0 | 0 |              | NA | . | ORG     | .          | .    | .                       | .                        |
| 0 | 0 |              | NA | . | .       | .          | .    | .                       | .                        |

|   |   |              |     |      |          |       |        |       |                          |                           |                          |
|---|---|--------------|-----|------|----------|-------|--------|-------|--------------------------|---------------------------|--------------------------|
| 0 | 0 | NA           | .   | .    | .        | .     | .      | .     | .                        | .                         |                          |
| 0 | 0 | NA           | .   | .    | .        | .     | .      | .     | .                        | .                         |                          |
| 0 | 0 | NA           | .   | SYS  | INTR.    | .     | .      | .     | .                        | .                         |                          |
| 0 | 0 | NA           | .   | SYS  | INTR.    | .     | .      | .     | .                        | .                         |                          |
| 0 | 0 | NA           | .   | GAM  | ORGCHRC. | .     | .      | .     | .                        | .                         |                          |
| 0 | 0 | NA           | .   | .    | .        | .     | .      | .     | .                        | .                         |                          |
| 0 | 0 | NA           | .   | .    | .        | .     | .      | .     | .                        | .                         |                          |
| 0 | 0 | Renal cell   | (NA | .    | .        | .     | .      | PID.  | .                        | .                         |                          |
| 0 | 0 | Renal cell   | (NA | .    | .        | .     | .      | PID.  | .                        | .                         |                          |
| 0 | 0 | Aland Islar  | NA  | .    | DETI     | INTRC | ATI    | (KEC. | .                        | .                         |                          |
| 0 | 0 | NA           | .   | .    | .        | .     | .      | .     | .                        | .                         |                          |
| 0 | 0 | NA           | .   | REG  | ORG.     | .     | .      | .     | REACTOME_DIABETES_PATHV  | .                         |                          |
| 0 | 0 | NA           | .   | .    | .        | .     | .      | .     | .                        | .                         |                          |
| 0 | 0 | Androgen i   | NA  | .    | EST/     | CYT   | (LIGAI | KEC   | PID.                     | REACTOME_GENERIC_TRANSI   |                          |
| 0 | 0 | NA           | .   | .    | .        | .     | .      | .     | .                        | .                         |                          |
| 0 | 0 | Mental retar | NA  | .    | .        | .     | .      | .     | .                        | .                         |                          |
| 0 | 0 | NA           | .   | .    | .        | .     | .      | .     | .                        | .                         |                          |
| 0 | 0 | NA           | .   | RNA  | NUC      | RNA_. | .      | .     | REACTOME_PROCESSING_OF.  | .                         |                          |
| 0 | 0 | NA           | .   | .    | .        | .     | .      | .     | .                        | .                         |                          |
| 0 | 0 | NA           | .   | .    | .        | .     | KEC.   | .     | REACTOME_HS_GAG_BIOSYN   | .                         |                          |
| 0 | 0 | NA           | .   | CYT  | .        | .     | PID.   | .     | REACTOME_SIGNALING_BY_RI | .                         |                          |
| 0 | 0 | NA           | .   | .    | .        | .     | .      | .     | .                        | .                         |                          |
| 0 | 0 | NA           | .   | .    | .        | .     | .      | .     | .                        | .                         |                          |
| 0 | 0 | NA           | .   | REG  | MEM      | KINA: | KEC    | PID.  | BIO                      | (REACTOME_SIGNALLING_BY_I |                          |
| 0 | 0 | NA           | .   | REG  | MEM      | KINA: | KEC    | PID.  | BIO                      | (REACTOME_SIGNALLING_BY_I |                          |
| 0 | 0 | NA           | .   | .    | .        | .     | .      | .     | .                        | .                         |                          |
| 0 | 0 | NA           | .   | .    | .        | .     | .      | .     | .                        | .                         |                          |
| 0 | 0 | NA           | .   | .    | .        | .     | .      | .     | .                        | .                         |                          |
| 0 | 0 | NA           | .   | .    | .        | .     | .      | .     | .                        | .                         |                          |
| 0 | 0 | Meier-Gorl   | NA  | .    | DNA      | NUC   | DNA_   | KEC   | PID.                     | BIO                       | (REACTOME_ACTIVATION_OF_ |
| 0 | 0 | NA           | .   | .    | .        | .     | .      | .     | .                        | .                         |                          |
| 0 | 0 | Myopia 21,   | NA  | .    | .        | .     | .      | .     | .                        | .                         |                          |
| 0 | 0 | NA           | .   | EST/ | INTRC    | ATI   | .      | .     | REACTOME_NEURONAL_SYST   | .                         |                          |
| 0 | 0 | NA           | .   | .    | .        | .     | .      | .     | .                        | .                         |                          |
| 0 | 0 | NA           | .   | .    | .        | .     | .      | .     | .                        | .                         |                          |
| 0 | 0 | NA           | .   | .    | .        | .     | .      | .     | .                        | .                         |                          |
| 0 | 0 | NA           | .   | .    | .        | .     | .      | .     | .                        | .                         |                          |
| 0 | 0 | NA           | .   | .    | .        | .     | .      | .     | .                        | .                         |                          |
| 0 | 0 | NA           | .   | .    | .        | .     | .      | .     | .                        | .                         |                          |
| 0 | 0 | NA           | .   | .    | .        | .     | .      | .     | .                        | .                         |                          |
| 0 | 0 | NA           | .   | .    | .        | .     | .      | .     | .                        | .                         |                          |
| 0 | 0 | NA           | .   | .    | .        | .     | .      | .     | .                        | .                         |                          |
| 0 | 0 | NA           | .   | .    | .        | .     | .      | .     | .                        | .                         |                          |
| 0 | 0 | NA           | .   | .    | .        | .     | .      | .     | .                        | .                         |                          |
| 0 | 0 | NA           | .   | .    | .        | .     | .      | .     | .                        | .                         |                          |
| 0 | 0 | NA           | .   | .    | .        | .     | .      | .     | .                        | .                         |                          |
| 0 | 0 | NA           | .   | .    | .        | .     | .      | .     | .                        | .                         |                          |
| 0 | 0 | NA           | .   | .    | .        | .     | KEC.   | .     | .                        | .                         |                          |
| 0 | 0 | NA           | .   | STEI | CYT      | (TRAN | KEC.   | .     | .                        | .                         |                          |







|   |   |                 |         |     |       |                          |                         |                          |                          |
|---|---|-----------------|---------|-----|-------|--------------------------|-------------------------|--------------------------|--------------------------|
| 0 | 0 | NA              | GTP/KEC | PID | BIO   | REACTOME_SIGNALLING_BY_I |                         |                          |                          |
| 0 | 0 | NA              | CELI    | MEN | CATI  | KEC                      | REACTOME_TRANSMISSION_A |                          |                          |
| 0 | 0 | Megaloblastosis | NA      | EST | MEN   | PRO                      | REACTOME_METABOLISM_OF  |                          |                          |
| 0 | 0 | NA              |         |     |       |                          |                         |                          |                          |
| 0 | 0 | NA              |         |     |       |                          |                         |                          |                          |
| 0 | 0 | NA              |         |     |       |                          |                         |                          |                          |
| 0 | 0 | NA              |         |     |       |                          | REACTOME_MITOCHONDRIAL  |                          |                          |
| 0 | 0 | NA              |         |     |       |                          |                         |                          |                          |
| 0 | 0 | NA              | EST     |     | CYTC  |                          |                         |                          |                          |
| 0 | 0 | NA              |         |     |       | KEC                      | REACTOME_TRANSMEMBRANI  |                          |                          |
| 0 | 0 | NA              |         |     |       |                          |                         |                          |                          |
| 0 | 0 | NA              | DIGE    | PRO | STRU  | KEC                      | REACTOME_O_LINKED_GLYCC |                          |                          |
| 0 | 0 | {Pulmonary}     | NA      |     |       |                          | REACTOME_O_LINKED_GLYCC |                          |                          |
| 0 | 0 | NA              |         |     |       |                          |                         |                          |                          |
| 0 | 0 | NA              | SIG     | OR  | RAS   |                          |                         |                          |                          |
| 0 | 0 | Exostoses       | NA      | SYS | ORG   | KEC                      | REACTOME_HS_GAG_BIOSYN  |                          |                          |
| 0 | 0 | NA              |         |     |       |                          |                         |                          |                          |
| 0 | 0 | NA              | POS     |     |       | KEC                      | PID                     | REACTOME_VEGF_LIGAND_RE  |                          |
| 0 | 0 | NA              | BIO     | CYT | ACID  | KEC                      |                         | REACTOME_DIABETES_PATHV  |                          |
| 0 | 0 | NA              |         | ORG |       |                          |                         | REACTOME_MHC_CLASS_II_AI |                          |
| 0 | 0 | NA              |         |     |       |                          |                         |                          |                          |
| 0 | 0 | NA              | REG     | CYT | RAS   | KEC                      | PID                     | REACTOME_SIGNALING_BY_RI |                          |
| 0 | 0 | NA              | REG     | CYT | RAS   | KEC                      | PID                     | REACTOME_SIGNALING_BY_RI |                          |
| 0 | 0 | NA              |         |     |       |                          |                         |                          |                          |
| 0 | 0 | Deafness        | NA      | LYS | OR    | G                        | CALM                    |                          |                          |
| 0 | 0 | NA              | RNA     | NUC |       |                          |                         |                          |                          |
| 0 | 0 | NA              |         |     |       |                          |                         |                          |                          |
| 0 | 0 | NA              | GLY     | INT | REX   | OF                       | KEC                     |                          |                          |
| 0 | 0 | NA              |         |     |       |                          | KEC                     | REACTOME_SIGNALING_BY_G  |                          |
| 0 | 0 | NA              |         |     |       |                          |                         |                          |                          |
| 0 | 0 | NA              |         |     |       |                          |                         |                          |                          |
| 0 | 0 | NA              |         |     |       |                          |                         |                          |                          |
| 0 | 0 | NA              |         |     |       |                          |                         |                          |                          |
| 0 | 0 | NA              |         |     |       |                          |                         |                          |                          |
| 0 | 0 | Deafness        | NA      |     |       |                          |                         |                          |                          |
| 0 | 0 | NA              | CELI    | CYT |       |                          |                         |                          |                          |
| 0 | 0 | NA              |         |     |       |                          |                         |                          |                          |
| 0 | 0 | NA              |         |     |       |                          |                         |                          |                          |
| 0 | 0 | NA              |         |     |       |                          |                         |                          |                          |
| 0 | 0 | NA              |         |     |       |                          |                         |                          |                          |
| 0 | 0 | Spermatogonia   | NA      | SYS | CELI  | OXID                     | KEC                     | BIO                      | REACTOME_LATENT_INFECTIC |
| 0 | 0 | NA              |         | NUC | TRAN  | KEC                      | PID                     | BIO                      | REACTOME_DEVELOPMENTAL   |
| 0 | 0 | NA              | DNA     | NON | TRAN  | KEC                      | PID                     | BIO                      | REACTOME_TRIF_MEDIATED   |
| 0 | 0 | NA              |         |     |       |                          |                         |                          |                          |
| 0 | 0 | NA              |         |     |       |                          |                         |                          |                          |
| 0 | 0 | NA              | PRO     | CYT | SERII |                          |                         |                          | REACTOME_IMMUNE_SYSTEM   |
| 0 | 0 | NA              |         |     |       |                          |                         |                          |                          |
| 0 | 0 | NA              |         |     |       |                          | KEC                     |                          | REACTOME_SIGNALING_BY_G  |
| 0 | 0 | NA              |         |     |       |                          |                         |                          |                          |



|   |    |              |    |               |                   |          |      |   |                         |
|---|----|--------------|----|---------------|-------------------|----------|------|---|-------------------------|
| 0 | 0. | NA           | .  | .             | .                 | .        | .    | . | .                       |
| 0 | 0. | NA           | .  | .             | .                 | .        | .    | . | .                       |
| 0 | 0. | NA           | .  | .             | .                 | .        | .    | . | .                       |
| 0 | 0. | NA           | .  | .             | .                 | .        | .    | . | .                       |
| 0 | 0  | Ciliary dyst | NA | .             | .                 | .        | .    | . | .                       |
| 0 | 0  | [Anhaptogl   | NA | .             | DEFI.             | .        | .    | . | .                       |
| 0 | 0. | NA           | .  | .             | .                 | .        | .    | . | .                       |
| 0 | 0. | NA           | .  | .             | .                 | .        | .    | . | .                       |
| 0 | 0  | Combined     | NA | .             | .                 | .        | .    | . | .                       |
| 0 | 0  | Combined     | NA | .             | .                 | .        | .    | . | .                       |
| 0 | 0. | NA           | .  | .             | .                 | .        | .    | . | .                       |
| 0 | 0. | NA           | .  | .             | .                 | .        | .    | . | .                       |
| 0 | 0. | NA           | .  | .             | .                 | .        | .    | . | .                       |
| 0 | 0. | NA           | .  | .             | .                 | .        | .    | . | REACTOME_INTERFERON_ALF |
| 0 | 0. | NA           | .  | CAL(CELI      | IDEN              | KEC.     | .    | . | REACTOME_CELL_CELL_COMI |
| 0 | 0. | NA           | .  | .             | .                 | .        | .    | . | .                       |
| 0 | 0. | NA           | .  | .             | .                 | MOT(KEC. | .    | . | .                       |
| 0 | 0. | NA           | .  | GAMORG.       | .                 | .        | .    | . | .                       |
| 0 | 0. | NA           | .  | GAMORG.       | .                 | .        | .    | . | .                       |
| 0 | 0. | NA           | .  | .             | .                 | .        | .    | . | .                       |
| 0 | 0. | NA           | .  | .             | .                 | .        | .    | . | .                       |
| 0 | 0. | NA           | .  | .             | .                 | .        | .    | . | .                       |
| 0 | 0. | NA           | .  | .             | .                 | .        | .    | . | .                       |
| 0 | 0. | NA           | .  | .             | .                 | .        | .    | . | .                       |
| 0 | 0. | NA           | .  | .             | .                 | .        | .    | . | .                       |
| 0 | 0. | NA           | .  | .             | .                 | .        | .    | . | .                       |
| 0 | 0. | NA           | .  | .             | .                 | .        | .    | . | .                       |
| 0 | 0. | NA           | .  | .             | .                 | .        | .    | . | .                       |
| 0 | 0. | NA           | .  | .             | .                 | .        | .    | . | .                       |
| 0 | 0. | NA           | .  | .             | .                 | .        | .    | . | .                       |
| 0 | 0. | NA           | .  | .             | .                 | .        | .    | . | .                       |
| 0 | 0  | Night blind  | NA | .             | .                 | .        | .    | . | .                       |
| 0 | 0. | NA           | .  | .             | .                 | .        | .    | . | .                       |
| 0 | 0. | NA           | .  | .             | .                 | .        | .    | . | .                       |
| 0 | 0  | Colorectal   | NA | .             | SIGNUC.           | KEC      | PID. | . | .                       |
| 0 | 0. | NA           | .  | .             | CYT(              | .        | .    | . | .                       |
| 0 | 0. | NA           | .  | .             | .                 | .        | .    | . | .                       |
| 0 | 0. | NA           | .  | .             | .                 | .        | .    | . | .                       |
| 0 | 0. | NA           | .  | PRO           | ORG               | CHAF.    | .    | . | REACTOME_PROTEIN_FOLDIN |
| 0 | 0. | NA           | .  | .             | .                 | .        | .    | . | .                       |
| 0 | 0. | NA           | .  | .             | .                 | .        | .    | . | .                       |
| 0 | 0. | NA           | .  | .             | .                 | .        | .    | . | .                       |
| 0 | 0  | Cerebral ci  | NA | .             | BIOS.             | MET(KEC. | .    | . | REACTOME_METABOLISM_OF_ |
| 0 | 0. | NA           | .  | .             | .                 | .        | .    | . | .                       |
| 0 | 0. | NA           | .  | .             | .                 | MET(KEC. | .    | . | .                       |
| 0 | 0. | NA           | .  | .             | .                 | MET(KEC. | .    | . | .                       |
| 0 | 0  | Spastic pai  | NA | .             | .                 | .        | .    | . | .                       |
| 0 | 0. | NA           | .  | EST/INTRACTI' | .                 | .        | .    | . | REACTOME_Glutamate_NEU  |
| 0 | 0. | NA           | .  | REG           | NUC               | SEQL.    | .    | . | .                       |
| 0 | 0. | NA           | .  | .             | .                 | .        | .    | . | .                       |
| 0 | 0. | NA           | .  | .             | .                 | .        | .    | . | .                       |
| 0 | 0. | NA           | .  | .             | .                 | .        | .    | . | .                       |
| 0 | 0  | Central cor  | NA | .             | EST/INTRCATI(KEC. | .        | .    | . | .                       |
| 0 | 0. | NA           | .  | .             | .                 | .        | .    | . | .                       |

|   |    |            |               |      |      |       |                          |
|---|----|------------|---------------|------|------|-------|--------------------------|
| 0 | 0. | NA         | REG INTR PEPT | KEC  | PID  | BIO   | REACTOME_SIGNALING_BY_G  |
| 0 | 0. | NA         | .             | .    | .    | .     | .                        |
| 0 | 0. | NA         | .             | .    | .    | .     | .                        |
| 0 | 0. | NA         | BIO           | RIBC | RECE | .     | .                        |
| 0 | 0. | NA         | .             | .    | .    | .     | .                        |
| 0 | 0. | NA         | .             | .    | KEC  | PID   | REACTOME_BIOLOGICAL_OXII |
| 0 | 0. | NA         | .             | .    | KEC  | PID   | REACTOME_BIOLOGICAL_OXII |
| 0 | 0. | NA         | .             | .    | .    | .     | .                        |
| 0 | 0. | NA         | .             | .    | .    | .     | .                        |
| 0 | 0. | NA         | .             | .    | .    | .     | .                        |
| 0 | 0. | NA         | .             | .    | .    | .     | .                        |
| 0 | 0. | NA         | .             | .    | .    | .     | .                        |
| 0 | 0. | NA         | .             | .    | .    | .     | .                        |
| 0 | 0. | NA         | .             | .    | .    | .     | .                        |
| 0 | 0. | NA         | .             | .    | .    | .     | .                        |
| 0 | 0. | NA         | .             | .    | .    | .     | .                        |
| 0 | 0. | NA         | .             | .    | .    | .     | .                        |
| 0 | 0. | NA         | EST           | INTR | CATI | .     | .                        |
| 0 | 0. | NA         | .             | .    | .    | .     | .                        |
| 0 | 0  | Conotrunc  | NA            | SYS  | NUC  | PROT  | .                        |
| 0 | 0. | NA         | .             | .    | .    | .     | .                        |
| 0 | 0. | NA         | .             | .    | .    | .     | .                        |
| 0 | 0. | NA         | .             | .    | .    | .     | .                        |
| 0 | 0. | NA         | .             | .    | .    | .     | .                        |
| 0 | 0. | NA         | GAM           | ORG  | CHRC | .     | .                        |
| 0 | 0  | Opitz GBB  | NA            | PAT  | ORG  | KEC   | .                        |
| 0 | 0. | NA         | .             | .    | .    | .     | .                        |
| 0 | 0. | NA         | .             | .    | .    | .     | .                        |
| 0 | 0. | NA         | BIOF          | .    | .    | .     | .                        |
| 0 | 0. | NA         | BIOF          | .    | .    | .     | .                        |
| 0 | 0. | NA         | .             | .    | .    | .     | .                        |
| 0 | 0. | NA         | .             | .    | .    | .     | .                        |
| 0 | 0. | NA         | .             | .    | .    | .     | .                        |
| 0 | 0  | Lujan-Fryn | NA            | RNA  | NUC  | RNA   | PID                      |
| 0 | 0. | NA         | .             | .    | .    | .     | REACTOME_DEVELOPMENTAL   |
| 0 | 0. | NA         | .             | .    | .    | .     | .                        |
| 0 | 0  | Lissenceph | NA            | SYS  | ORG  | MICR  | PID                      |
| 0 | 0  | Dent disea | NA            | LIPI | ORG  | PHOS  | KEC                      |
| 0 | 0  | Hypothyroi | NA            | SIGN | INTR | PROT  | .                        |
| 0 | 0. | NA         | .             | .    | .    | .     | .                        |
| 0 | 0. | NA         | SYS           | CYT  | ENZY | KEC   | .                        |
| 0 | 0. | NA         | .             | .    | .    | .     | .                        |
| 0 | 0  | Cardiac va | NA            | NUC  | CYT  | ACTII | KEC                      |
| 0 | 0. | NA         | .             | .    | .    | .     | PID                      |
| 0 | 0. | NA         | .             | .    | .    | .     | .                        |
| 0 | 0. | NA         | .             | .    | .    | .     | .                        |
| 0 | 0. | NA         | .             | .    | .    | .     | .                        |
| 0 | 0. | NA         | REG           | NUC  | NUCL | PID   | BIO                      |









|   |    |            |    |           |           |   |      |   |                         |
|---|----|------------|----|-----------|-----------|---|------|---|-------------------------|
| 0 | 0. | NA         | .  | .         | .         | . | .    | . | .                       |
| 0 | 0. | NA         | .  | .         | .         | . | .    | . | .                       |
| 0 | 0. | NA         | .  | .         | .         | . | .    | . | .                       |
| 0 | 0. | NA         | .  | .         | .         | . | .    | . | .                       |
| 0 | 0. | NA         | .  | .         | .         | . | .    | . | .                       |
| 0 | 0. | NA         | .  | .         | .         | . | .    | . | REACTOME_TRANSMISSION_A |
| 0 | 0. | NA         | .  | EXTIPRO1. | .         | . | .    | . | .                       |
| 0 | 0. | NA         | .  | .         | .         | . | .    | . | .                       |
| 0 | 0. | NA         | .  | .         | .         | . | .    | . | .                       |
| 0 | 0. | NA         | .  | .         | .         | . | .    | . | .                       |
| 0 | 0  | Mainzer-S& | NA | .         | .         | . | .    | . | .                       |
| 0 | 0. | NA         | .  | DEFIEXTI. | .         | . | .    | . | .                       |
| 0 | 0. | NA         | .  | .         | .         | . | .    | . | .                       |
| 0 | 0. | NA         | .  | .         | .         | . | .    | . | .                       |
| 0 | 0. | NA         | .  | .         | .         | . | .    | . | .                       |
| 0 | 0. | NA         | .  | .         | .         | . | .    | . | .                       |
| 0 | 0. | NA         | .  | .         | .         | . | .    | . | .                       |
| 0 | 0. | NA         | .  | .         | .         | . | .    | . | .                       |
| 0 | 0. | NA         | .  | .         | .         | . | .    | . | .                       |
| 0 | 0. | NA         | .  | .         | .         | . | .    | . | .                       |
| 0 | 0. | NA         | .  | .         | .         | . | .    | . | .                       |
| 0 | 0. | NA         | .  | .         | .         | . | .    | . | .                       |
| 0 | 0. | NA         | .  | .         | .         | . | .    | . | .                       |
| 0 | 0. | NA         | .  | .         | .         | . | .    | . | .                       |
| 0 | 0. | NA         | .  | .         | .         | . | .    | . | .                       |
| 0 | 0. | NA         | .  | .         | .         | . | .    | . | .                       |
| 0 | 0. | NA         | .  | .         | .         | . | .    | . | .                       |
| 0 | 0. | NA         | .  | .         | .         | . | .    | . | .                       |
| 0 | 0. | NA         | .  | .         | .         | . | .    | . | .                       |
| 0 | 0. | NA         | .  | .         | .         | . | .    | . | .                       |
| 0 | 0. | NA         | .  | .         | .         | . | .    | . | .                       |
| 0 | 0. | NA         | .  | .         | .         | . | .    | . | .                       |
| 0 | 0. | NA         | .  | .         | .         | . | .    | . | .                       |
| 0 | 0. | NA         | .  | .         | .         | . | .    | . | .                       |
| 0 | 0. | NA         | .  | .         | .         | . | .    | . | .                       |
| 0 | 0. | NA         | .  | .         | .         | . | .    | . | .                       |
| 0 | 0. | NA         | .  | .         | .         | . | .    | . | .                       |
| 0 | 0. | NA         | .  | .         | .         | . | .    | . | .                       |
| 0 | 0. | NA         | .  | .         | .         | . | .    | . | .                       |
| 0 | 0. | NA         | .  | .         | .         | . | .    | . | REACTOME_PYRUVATE_META  |
| 0 | 0. | NA         | .  | .         | .         | . | .    | . | .                       |
| 0 | 0  | Fanconi ar | NA | .         | DNA_CYT0. | . | PID. | . | REACTOME_FANCONI_ANEMIA |
| 0 | 0. | NA         | .  | .         | .         | . | KEC. | . | .                       |
| 0 | 0. | NA         | .  | .         | .         | . | .    | . | .                       |
| 0 | 0. | NA         | .  | NEG.      | TRAN.     | . | .    | . | .                       |
| 0 | 0  | Mitochondr | NA | .         | .         | . | .    | . | .                       |
| 0 | 0. | NA         | .  | .         | .         | . | .    | . | .                       |
| 0 | 0. | NA         | .  | .         | .         | . | .    | . | .                       |
| 0 | 0. | NA         | .  | .         | .         | . | .    | . | .                       |
| 0 | 0. | NA         | .  | .         | .         | . | .    | . | .                       |
| 0 | 0. | NA         | .  | .         | .         | . | .    | . | .                       |
| 0 | 0. | NA         | .  | .         | .         | . | .    | . | .                       |
| 0 | 0. | NA         | .  | .         | .         | . | .    | . | .                       |
| 0 | 0. | NA         | .  | .         | .         | . | .    | . | .                       |
| 0 | 0. | NA         | .  | .         | .         | . | .    | . | .                       |
| 0 | 0  | Koolen-De  | NA | .         | .         | . | .    | . | .                       |

|   |    |             |    |   |                    |           |                          |                          |
|---|----|-------------|----|---|--------------------|-----------|--------------------------|--------------------------|
| 0 | 0. | NA          | .  | . | CATI(KEC.          | .         | .                        |                          |
| 0 | 0. | NA          | .  | . | .                  | .         | .                        |                          |
| 0 | 0. | NA          | .  | . | KEC.               | .         | .                        |                          |
| 0 | 0  | Amyotroph   | NA | . | PRO ORGHYDF.       | .         | .                        |                          |
| 0 | 0. | NA          | .  | . | .                  | .         | .                        |                          |
| 0 | 0  | {Diabetes r | NA | . | REG INTRG_PF       | KEC.      | REACTOME_GASTRIN_CREB_S  |                          |
| 0 | 0. | NA          | .  | . | KEC                | PID, BIO( | REACTOME_VITAMIN_B5_PAN  |                          |
| 0 | 0. | NA          | .  | . | DNA CYT(PRO)       | .         | .                        |                          |
| 0 | 0. | NA          | .  | . | KEC.               | .         | .                        |                          |
| 0 | 0. | NA          | .  | . | RNA.               | RNA.      | REACTOME_DIABETES_PATHV  |                          |
| 0 | 0. | NA          | .  | . | DNA.               | KEC.      | REACTOME_TRANSCRIPTION_  |                          |
| 0 | 0. | NA          | .  | . | EST/ORG.           | .         | REACTOME_MITOCHONDRIAL_  |                          |
| 0 | 0. | NA          | .  | . | .                  | .         | .                        |                          |
| 0 | 0. | NA          | .  | . | .                  | .         | .                        |                          |
| 0 | 0. | NA          | .  | . | .                  | .         | .                        |                          |
| 0 | 0. | NA          | .  | . | EST/NUC ACTII.     | .         | REACTOME_DEVELOPMENTAL   |                          |
| 0 | 0. | NA          | .  | . | KEC.               | .         | REACTOME_DIABETES_PATHV  |                          |
| 0 | 0. | NA          | .  | . | .                  | .         | .                        |                          |
| 0 | 0. | NA          | .  | . | LIPII CYT(LIPAS.   | .         | REACTOME_ACYL_CHAIN_REM  |                          |
| 0 | 0. | NA          | .  | . | .                  | .         | REACTOME_METABOLISM_OF_  |                          |
| 0 | 0. | NA          | .  | . | .                  | .         | .                        |                          |
| 0 | 0. | NA          | .  | . | .                  | .         | .                        |                          |
| 0 | 0. | NA          | .  | . | .                  | .         | .                        |                          |
| 0 | 0  | Spinoceret  | NA | . | DNA.               | PHO(KEC   | PID, BIO(                | REACTOME_SIGNALLING_BY_I |
| 0 | 0. | NA          | .  | . | .                  | .         | REACTOME_GENERIC_TRANS(  |                          |
| 0 | 0. | NA          | .  | . | .                  | .         | .                        |                          |
| 0 | 0. | NA          | .  | . | .                  | .         | .                        |                          |
| 0 | 0  | Spinoceret  | NA | . | .                  | .         | .                        |                          |
| 0 | 0. | NA          | .  | . | .                  | .         | .                        |                          |
| 0 | 0. | NA          | .  | . | .                  | .         | .                        |                          |
| 0 | 0. | NA          | .  | . | .                  | .         | .                        |                          |
| 0 | 0. | NA          | .  | . | .                  | .         | .                        |                          |
| 0 | 0. | NA          | .  | . | .                  | .         | .                        |                          |
| 0 | 0. | NA          | .  | . | .                  | .         | .                        |                          |
| 0 | 0. | NA          | .  | . | .                  | .         | .                        |                          |
| 0 | 0. | NA          | .  | . | .                  | .         | .                        |                          |
| 0 | 0. | NA          | .  | . | .                  | .         | .                        |                          |
| 0 | 0. | NA          | .  | . | ANA.               | TRAN.     | .                        |                          |
| 0 | 0. | NA          | .  | . | .                  | .         | .                        |                          |
| 0 | 0. | NA          | .  | . | .                  | .         | .                        |                          |
| 0 | 0. | NA          | .  | . | DNA NUC.           | KEC.      | BIO(                     | REACTOME_ACTIVATION_OF_  |
| 0 | 0. | NA          | .  | . | .                  | .         | .                        |                          |
| 0 | 0. | NA          | .  | . | .                  | .         | .                        |                          |
| 0 | 0. | NA          | .  | . | .                  | .         | .                        |                          |
| 0 | 0. | NA          | .  | . | ACTI ORGCATI.      | .         | .                        |                          |
| 0 | 0. | NA          | .  | . | .                  | .         | .                        |                          |
| 0 | 0. | NA          | .  | . | CELI.              | .         | .                        |                          |
| 0 | 0  | Neutropeni  | NA | . | REG NON GTP(KEC    | PID.      | REACTOME_TCR_SIGNALING;F |                          |
| 0 | 0  | Aland Islan | NA | . | DETI INTRCATI(KEC. | .         | .                        |                          |





|   |    |              |                |               |              |                          |
|---|----|--------------|----------------|---------------|--------------|--------------------------|
| 0 | 0. | NA           | NEG CYTO       | KEC           |              |                          |
| 0 | 0. | NA           |                |               |              |                          |
| 0 | 0. | NA           |                |               |              |                          |
| 0 | 0. | NA           |                |               |              |                          |
| 0 | 0. | NA           | NUC            |               |              | REACTOME_RNA_POL_III_TRA |
| 0 | 0  | Carbamoyl NA | CYT(LIGA       | KEC           |              | REACTOME_METABOLISM_OF   |
| 0 | 0. | NA           |                |               |              |                          |
| 0 | 0. | NA           | DEFINUC TRAN   |               |              |                          |
| 0 | 0. | NA           | DEFINUC TRAN   |               |              |                          |
| 0 | 0  | Brachydac    | RNA NUC TRAN   | PID, BIO      |              | REACTOME_NOTCH1_INTRACI  |
| 0 | 0. | NA           |                |               |              |                          |
| 0 | 0. | NA           |                | KEC           |              | REACTOME_FACTORS_INVOL   |
| 0 | 0. | NA           |                |               |              |                          |
| 0 | 0. | NA           |                |               |              |                          |
| 0 | 0. | NA           |                | KEC           |              |                          |
| 0 | 0  | Gray platel  | NA             |               |              |                          |
| 0 | 0. | NA           |                |               |              |                          |
| 0 | 0  | Mitochondr   | NA             |               |              |                          |
| 0 | 0. | NA           |                |               |              |                          |
| 0 | 0. | NA           |                | KEC           |              |                          |
| 0 | 0. | NA           | SYS INTR LIPOI |               |              |                          |
| 0 | 0. | NA           |                |               |              |                          |
| 0 | 0  | Robinow s    | NA             | SIG EXTI RECE | KEC PID      | REACTOME_SIGNALING_BY_G  |
| 0 | 0. | NA           |                |               | KEC PID      |                          |
| 0 | 0. | NA           |                |               |              |                          |
| 0 | 0. | NA           |                |               |              |                          |
| 0 | 0. | NA           |                | KEC           |              |                          |
| 0 | 0. | NA           |                | KEC           |              |                          |
| 0 | 0. | NA           |                |               |              |                          |
| 0 | 0. | NA           |                |               |              |                          |
| 0 | 0. | NA           | NUC END        | KEC           |              | REACTOME_BASE_EXCISION_I |
| 0 | 0. | NA           | NUC END        | KEC           |              | REACTOME_BASE_EXCISION_I |
| 0 | 0. | NA           |                |               |              |                          |
| 0 | 0  | Hailey-Hail  | NA             | REG ORGCATI   |              | REACTOME_TRANSMEMBRANI   |
| 0 | 0. | NA           |                |               |              |                          |
| 0 | 0  | Blepharop    | NA             | DNA NUC ENZY  |              |                          |
| 0 | 0. | NA           |                |               | KEC PID      |                          |
| 0 | 0  | Cutaneous    | NA             | DNA           | PROT         | KEC PID, BIO             |
| 0 | 0  | Bleeding di  | NA             |               |              | REACTOME_SIGNALING_BY_G  |
| 0 | 0  | Leukemia,    | NA             | SYS CYT       | PROT         |                          |
| 0 | 0. | NA           |                |               |              |                          |
| 0 | 0  | Fanconi-Bi   | NA             | EST/INTR      | SUG/KEC PID  | REACTOME_DEVELOPMENTAL   |
| 0 | 0. | NA           |                |               |              |                          |
| 0 | 0. | NA           |                |               |              |                          |
| 0 | 0. | NA           | ORG            | SMAL          | KEC          |                          |
| 0 | 0. | NA           | DNA ORG        |               | KEC PID      | REACTOME_CELL_CYCLE;REA  |
| 0 | 0. | NA           |                |               |              |                          |
| 0 | 0. | NA           |                |               |              |                          |
| 0 | 0. | NA           |                |               |              |                          |
| 0 | 0. | NA           |                |               |              |                          |
| 0 | 0. | NA           |                |               |              |                          |
| 0 | 0. | NA           |                |               |              | REACTOME_GENERIC_TRANSI  |
| 0 | 0. | NA           | INTR           |               |              | REACTOME_TRANSMEMBRANI   |
| 0 | 0. | NA           | REG NUC RNA    |               | KEC PID, BIO | REACTOME_DEVELOPMENTAL   |

|   |    |             |    |          |           |         |       |                          |      |                          |                          |
|---|----|-------------|----|----------|-----------|---------|-------|--------------------------|------|--------------------------|--------------------------|
| 0 | 0. | NA          | .  | .        | .         | .       | .     | .                        | .    |                          |                          |
| 0 | 0. | NA          | .  | .        | NUCL.     | .       | .     | .                        | .    |                          |                          |
| 0 | 0. | NA          | .  | .        | .         | .       | .     | .                        | .    |                          |                          |
| 0 | 0. | NA          | .  | .        | .         | .       | .     | .                        | .    |                          |                          |
| 0 | 0. | NA          | .  | .        | .         | KEC.    | .     | .                        | .    |                          |                          |
| 0 | 0. | NA          | .  | .        | .         | KEC.    | .     | .                        | .    |                          |                          |
| 0 | 0. | NA          | .  | SIGN     | CYT(      | .       | .     | .                        | .    |                          |                          |
| 0 | 0  | Wolfram sy  | NA | .        | MAC.      | .       | .     | .                        | .    |                          |                          |
| 0 | 0. | NA          | .  | .        | EXTICARE. | .       | .     | REACTOME_EXTRACELLULAR   | .    |                          |                          |
| 0 | 0. | NA          | .  | .        | .         | .       | .     | .                        | .    |                          |                          |
| 0 | 0  | Ceroid lipo | NA | .        | .         | KEC.    | .     | .                        | .    |                          |                          |
| 0 | 0. | NA          | .  | .        | .         | .       | .     | .                        | .    |                          |                          |
| 0 | 0  | [Blood gro  | NA | .        | INTR.     | .       | .     | .                        | .    |                          |                          |
| 0 | 0. | NA          | .  | SIGN     | CYT(      | PHOS    | KEC.  | REACTOME_NITRIC_OXIDE_ST | .    |                          |                          |
| 0 | 0  | Short rib-p | NA | .        | CYT(      | .       | .     | .                        | .    |                          |                          |
| 0 | 0. | NA          | .  | .        | .         | .       | .     | .                        | .    |                          |                          |
| 0 | 0. | NA          | .  | CELICYT( | CATI(     | .       | .     | .                        | .    |                          |                          |
| 0 | 0. | NA          | .  | .        | .         | .       | .     | .                        | .    |                          |                          |
| 0 | 0  | Increased i | NA | .        | SYS       | INTR    | RECE  | KEC                      | PID  | BIO(                     | REACTOME_GROWTH_HORMC    |
| 0 | 0. | NA          | .  | .        | .         | .       | .     | .                        | .    | .                        |                          |
| 0 | 0. | NA          | .  | .        | .         | .       | .     | .                        | .    | .                        |                          |
| 0 | 0. | NA          | .  | .        | .         | .       | .     | .                        | .    | .                        |                          |
| 0 | 0. | NA          | .  | .        | .         | .       | .     | .                        | .    | .                        |                          |
| 0 | 0. | NA          | .  | .        | .         | .       | .     | .                        | .    | REACTOME_RNA_POL_I_TRAN  |                          |
| 0 | 0. | NA          | .  | .        | .         | .       | .     | .                        | .    | .                        |                          |
| 0 | 0  | Sandhoff d  | NA | .        | .         | PRO     | KEC.  | REACTOME_GLYCOSPHINGOL   | .    | .                        |                          |
| 0 | 0  | Sandhoff d  | NA | .        | .         | PRO     | KEC.  | REACTOME_GLYCOSPHINGOL   | .    | .                        |                          |
| 0 | 0  | D-bifunctio | NA | .        | .         | CYT(    | LIPID | KEC.                     | BIO( | REACTOME_BILE_ACID_AND_E |                          |
| 0 | 0  | Usher sync  | NA | .        | .         | .       | KEC.  | REACTOME_CYTOSOLIC_TRN/  | .    | .                        |                          |
| 0 | 0  | Usher sync  | NA | .        | .         | .       | KEC.  | REACTOME_CYTOSOLIC_TRN/  | .    | .                        |                          |
| 0 | 0. | NA          | .  | SIGN     | NUC       | HYDF.   | .     | .                        | .    | .                        |                          |
| 0 | 0  | Hyperekple  | NA | .        | REG       | INTREXC | KEC.  | REACTOME_TRANSMEMBRANI   | .    | .                        |                          |
| 0 | 0. | NA          | .  | .        | .         | .       | .     | .                        | .    | .                        |                          |
| 0 | 0. | NA          | .  | .        | .         | .       | .     | .                        | .    | REACTOME_DEVELOPMENTAL   |                          |
| 0 | 0. | NA          | .  | .        | .         | .       | .     | .                        | .    | .                        |                          |
| 0 | 0. | NA          | .  | .        | .         | KEC.    | .     | .                        | .    | .                        |                          |
| 0 | 0. | NA          | .  | .        | .         | .       | .     | .                        | .    | .                        |                          |
| 0 | 0. | NA          | .  | CELI.    | .         | .       | .     | .                        | .    | .                        |                          |
| 0 | 0. | NA          | .  | RES      | CYT(      | .       | .     | .                        | .    | .                        |                          |
| 0 | 0. | NA          | .  | GAM.     | .         | .       | .     | .                        | .    | .                        |                          |
| 0 | 0. | NA          | .  | .        | .         | KEC.    | .     | REACTOME_MEIOSIS;REACTO  | .    | .                        |                          |
| 0 | 0. | NA          | .  | .        | .         | .       | .     | .                        | .    | .                        |                          |
| 0 | 0. | NA          | .  | .        | .         | .       | .     | .                        | .    | .                        |                          |
| 0 | 0. | NA          | .  | .        | .         | .       | .     | .                        | .    | .                        |                          |
| 0 | 0. | NA          | .  | RNA      | NUC       | RNA_    | KEC.  | .                        | .    | .                        |                          |
| 0 | 0. | NA          | .  | RNA      | NUC       | RNA_    | KEC.  | .                        | .    | .                        |                          |
| 0 | 0. | NA          | .  | .        | .         | .       | .     | .                        | .    | .                        |                          |
| 0 | 0  | {Asthma, s  | NA | .        | RNA       | CELI    | RECE  | KEC                      | PID  | BIO(                     | REACTOME_EXTRINSIC_PATH' |
| 0 | 0. | NA          | .  | .        | .         | .       | .     | .                        | .    | .                        |                          |
| 0 | 0. | NA          | .  | BIOF     | NUC       | PHOS.   | .     | .                        | .    | .                        |                          |
| 0 | 0. | NA          | .  | .        | .         | .       | .     | .                        | .    | .                        |                          |
| 0 | 0  | Adrenal hy  | NA | .        | .         | KEC.    | .     | REACTOME_METABOLISM_OF   | .    | .                        |                          |
| 0 | 0. | NA          | .  | .        | .         | .       | .     | .                        | .    | .                        |                          |
| 0 | 0. | NA          | .  | RNA      | NUC       | SPEC    | KEC.  | .                        | .    | .                        |                          |



|   |              |                |         |       |                |             |                          |                          |   |
|---|--------------|----------------|---------|-------|----------------|-------------|--------------------------|--------------------------|---|
| 0 | 0 Mental ret | NA             | .       | .     | .              | .           | .                        | .                        | . |
| 0 | 0.           | NA             | .       | .     | .              | .           | .                        | .                        | . |
| 0 | 0.           | NA             | .       | .     | .              | .           | .                        | .                        | . |
| 0 | 0.           | NA             | REG.    | .     | .              | KEC PID.BIO | REACTOME_TRAF6_MEDIATED  | .                        | . |
| 0 | 0.           | NA             | .       | .     | .              | .           | .                        | .                        | . |
| 0 | 0.           | NA             | .       | .     | .              | .           | .                        | .                        | . |
| 0 | 0.           | NA             | .       | .     | .              | .           | .                        | .                        | . |
| 0 | 0.           | NA             | .       | .     | .              | .           | .                        | .                        | . |
| 0 | 0.           | NA             | .       | .     | .              | .           | .                        | .                        | . |
| 0 | 0.           | NA             | .       | .     | .              | .           | .                        | .                        | . |
| 0 | 0            | 0 Choreoaca    | NA      | .     | .              | .           | .                        | .                        | . |
| 0 | 0.           | NA             | .       | .     | .              | PID.        | REACTOME_NOTCH1_INTRACI  | .                        | . |
| 0 | 0.           | NA             | .       | .     | .              | .           | .                        | .                        | . |
| 0 | 0.           | NA             | .       | .     | .              | PID.        | .                        | .                        | . |
| 0 | 0            | 0 Nail-patella | NA      | .     | RNA NUC TRAN.  | .           | .                        | .                        | . |
| 0 | 0.           | NA             | CELI.   | .     | .              | .           | .                        | .                        | . |
| 0 | 0.           | NA             | .       | .     | .              | .           | .                        | .                        | . |
| 0 | 0.           | NA             | .       | .     | .              | .           | .                        | .                        | . |
| 0 | 0.           | NA             | ENZ'    | .     | .              | KEC PID.BIO | REACTOME_SIGNALLING_BY_I | .                        | . |
| 0 | 0.           | NA             | .       | .     | .              | .           | .                        | .                        | . |
| 0 | 0.           | NA             | .       | .     | .              | .           | .                        | .                        | . |
| 0 | 0.           | NA             | BIOFCYT | IDEN' | .              | .           | REACTOME_METABOLISM_OF_  | .                        | . |
| 0 | 0.           | NA             | .       | .     | .              | .           | .                        | .                        | . |
| 0 | 0.           | NA             | .       | .     | .              | .           | .                        | .                        | . |
| 0 | 0.           | NA             | .       | .     | .              | .           | .                        | .                        | . |
| 0 | 0.           | NA             | .       | .     | .              | .           | .                        | .                        | . |
| 0 | 0.           | NA             | .       | .     | .              | KEC PID.    | REACTOME_DEVELOPMENTAL   | .                        | . |
| 0 | 0.           | NA             | .       | .     | .              | KEC PID.    | REACTOME_DEVELOPMENTAL   | .                        | . |
| 0 | 0            | 0 Deafness,    | NA      | .     | REG NON.       | .           | .                        | .                        | . |
| 0 | 0.           | NA             | .       | .     | .              | .           | .                        | .                        | . |
| 0 | 0.           | NA             | .       | .     | .              | .           | .                        | .                        | . |
| 0 | 0            | 0 Microceph    | NA      | .     | M_PI ORG MICR. | .           | .                        | REACTOME_MHC_CLASS_II_AI | . |
| 0 | 0.           | NA             | .       | .     | NUC TRAN.      | .           | .                        | .                        | . |
| 0 | 0            | 0 {Age-relate  | NA      | .     | .              | LIPID.      | PID.                     | .                        | . |
| 0 | 0.           | NA             | .       | .     | .              | .           | .                        | .                        | . |
| 0 | 0.           | NA             | .       | .     | .              | .           | .                        | REACTOME_O_LINKED_GLYCC  | . |
| 0 | 0.           | NA             | .       | .     | .              | .           | .                        | .                        | . |
| 0 | 0            | 0 Charcot-Mi   | NA      | .     | MEM.           | .           | .                        | .                        | . |
| 0 | 0.           | NA             | .       | .     | .              | .           | .                        | .                        | . |
| 0 | 0            | 0 Denys-Dra    | NA      | .     | .              | .           | PID.BIO                  | .                        | . |
| 0 | 0.           | NA             | .       | .     | NUC NUCL       | KEC.        | .                        | .                        | . |
| 0 | 0.           | NA             | .       | .     | .              | KEC.        | .                        | .                        | . |
| 0 | 0.           | NA             | .       | .     | .              | .           | .                        | .                        | . |
| 0 | 0.           | NA             | .       | .     | .              | .           | .                        | .                        | . |
| 0 | 0.           | NA             | .       | .     | .              | .           | .                        | .                        | . |
| 0 | 0.           | NA             | .       | .     | .              | .           | .                        | .                        | . |
| 0 | 0.           | NA             | .       | .     | .              | .           | .                        | .                        | . |
| 0 | 0.           | NA             | .       | .     | .              | .           | .                        | .                        | . |
| 0 | 0.           | NA             | POS.    | .     | .              | KEC PID.    | REACTOME_VEGF_LIGAND_RE  | .                        | . |
| 0 | 0.           | NA             | .       | .     | CYT(DRUC.      | .           | .                        | .                        | . |



|   |    |             |    |           |           |       |                         |                         |                         |
|---|----|-------------|----|-----------|-----------|-------|-------------------------|-------------------------|-------------------------|
| 0 | 0. | NA          | .  | CYT(DRUC. | .         | .     | .                       |                         |                         |
| 0 | 0. | NA          | .  | .         | .         | .     | .                       |                         |                         |
| 0 | 0  | Glaucoma    | NA | .         | .         | .     | .                       |                         |                         |
| 0 | 0. | NA          | .  | .         | KEC.      | .     | .                       |                         |                         |
| 0 | 0. | NA          | .  | INTR.     | KEC       | PID.  | REACTOME_DEVELOPMENTAL  |                         |                         |
| 0 | 0. | NA          | .  | ORGPEPT.  | .         | .     | .                       |                         |                         |
| 0 | 0. | NA          | .  | ORGPEPT.  | .         | .     | .                       |                         |                         |
| 0 | 0  | Megalence   | NA | .         | .         | .     | .                       |                         |                         |
| 0 | 0. | NA          | .  | .         | .         | .     | .                       |                         |                         |
| 0 | 0. | NA          | .  | HYDF      | KEC.      | .     | REACTOME_GLYCOLYSIS;REA |                         |                         |
| 0 | 0. | NA          | .  | HYDF      | KEC.      | .     | REACTOME_GLYCOLYSIS;REA |                         |                         |
| 0 | 0. | NA          | .  | .         | .         | .     | REACTOME_MEMBRANE_TRAF  |                         |                         |
| 0 | 0  | Warsaw br   | NA | POS       | ORG.      | .     | REACTOME_DIABETES_PATHV |                         |                         |
| 0 | 0. | NA          | .  | .         | .         | .     | .                       |                         |                         |
| 0 | 0. | NA          | .  | .         | .         | .     | .                       |                         |                         |
| 0 | 0. | NA          | .  | RNA       | NUC       | RNA_. | .                       |                         |                         |
| 0 | 0  | Vitamin D-  | NA | BIOS.     | .         | KEC.  | REACTOME_METABOLISM_OF_ |                         |                         |
| 0 | 0  | Vitamin D-  | NA | BIOS.     | .         | KEC.  | REACTOME_METABOLISM_OF_ |                         |                         |
| 0 | 0. | NA          | .  | .         | .         | .     | .                       |                         |                         |
| 0 | 0. | NA          | .  | .         | .         | .     | .                       |                         |                         |
| 0 | 0  | Deafness,   | NA | .         | .         | .     | .                       |                         |                         |
| 0 | 0. | NA          | .  | .         | .         | .     | .                       |                         |                         |
| 0 | 0  | Mental retæ | NA | CELL.     | .         | PID   | BIO(.                   |                         |                         |
| 0 | 0  | Arthrogryp  | NA | .         | CYT(STRL. | .     | REACTOME_STRIATED_MUSCI |                         |                         |
| 0 | 0. | NA          | .  | .         | .         | .     | .                       |                         |                         |
| 0 | 0  | Transpositi | NA | .         | .         | .     | REACTOME_DEVELOPMENTAL  |                         |                         |
| 0 | 0. | NA          | .  | .         | .         | .     | .                       |                         |                         |
| 0 | 0. | NA          | .  | ACTI.     | LIPA&     | KEC   | PID.                    |                         |                         |
| 0 | 0. | NA          | .  | .         | .         | .     | REACTOME_ACYL_CHAIN_REM |                         |                         |
| 0 | 0. | NA          | .  | .         | .         | .     | .                       |                         |                         |
| 0 | 0. | NA          | .  | EST/.     | .         | PID.  | .                       |                         |                         |
| 0 | 0. | NA          | .  | ORG.      | .         | .     | .                       |                         |                         |
| 0 | 0. | NA          | .  | .         | .         | .     | .                       |                         |                         |
| 0 | 0. | NA          | .  | .         | .         | PID.  | REACTOME_FACTORS_INVOL\ |                         |                         |
| 0 | 0  | Spinoceret  | NA | SYS.      | RECE      | KEC.  | .                       |                         |                         |
| 0 | 0. | NA          | .  | .         | .         | .     | .                       |                         |                         |
| 0 | 0. | NA          | .  | .         | .         | .     | .                       |                         |                         |
| 0 | 0. | NA          | .  | .         | .         | .     | .                       |                         |                         |
| 0 | 0. | NA          | .  | .         | .         | .     | .                       |                         |                         |
| 0 | 0. | NA          | .  | .         | .         | .     | .                       |                         |                         |
| 0 | 0. | NA          | .  | .         | .         | .     | .                       |                         |                         |
| 0 | 0  | Dystonia, [ | NA | REG.      | HYDF      | KEC.  | REACTOME_TETRAHYDROBIO  |                         |                         |
| 0 | 0. | NA          | .  | .         | .         | .     | .                       |                         |                         |
| 0 | 0  | {Pheochroi  | NA | RNA.      | TRAN      | KEC   | PID                     | BIO(                    | REACTOME_CELL_CYCLE;REA |
| 0 | 0  | {Pheochroi  | NA | RNA.      | TRAN      | KEC   | PID                     | BIO(                    | REACTOME_CELL_CYCLE;REA |
| 0 | 0  | Microphtha  | NA | .         | .         | .     | .                       | .                       | .                       |
| 0 | 0. | NA          | .  | .         | .         | .     | .                       | .                       | .                       |
| 0 | 0. | NA          | .  | .         | .         | .     | .                       | .                       | .                       |
| 0 | 0. | NA          | .  | .         | .         | .     | .                       | .                       | .                       |
| 0 | 0. | NA          | .  | .         | CYST      | KEC.  | .                       | REACTOME_METABOLISM_OF_ |                         |
| 0 | 0. | NA          | .  | .         | .         | .     | .                       | .                       | .                       |
| 0 | 0. | NA          | .  | SIGN.     | .         | PID   | BIO(.                   | .                       | .                       |
| 0 | 0. | NA          | .  | .         | .         | .     | .                       | .                       | .                       |
| 0 | 0. | NA          | .  | .         | .         | .     | .                       | .                       | .                       |

|   |    |              |    |                |            |      |          |          |                           |
|---|----|--------------|----|----------------|------------|------|----------|----------|---------------------------|
| 0 | 0. | NA           | .  | .              | .          | .    | .        | .        | .                         |
| 0 | 0. | NA           | .  | .              | .          | .    | .        | .        | .                         |
| 0 | 0  | [Skin/hair/ε | NA | .              | .          | .    | KEC.     | .        | REACTOME_IMMUNE_SYSTEM    |
| 0 | 0. | NA           | .  | .              | .          | .    | .        | .        | .                         |
| 0 | 0. | NA           | .  | .              | .          | .    | .        | .        | .                         |
| 0 | 0. | NA           | .  | .              | .          | .    | .        | .        | .                         |
| 0 | 0. | NA           | .  | .              | .          | .    | .        | .        | .                         |
| 0 | 0. | NA           | .  | .              | .          | .    | .        | .        | .                         |
| 0 | 0. | NA           | .  | .              | .          | .    | .        | .        | .                         |
| 0 | 0. | NA           | .  | .              | .          | .    | .        | .        | .                         |
| 0 | 0. | NA           | .  | .              | .          | .    | .        | .        | REACTOME_DEVELOPMENTAL    |
| 0 | 0. | NA           | .  | .              | .          | .    | .        | .        | .                         |
| 0 | 0. | NA           | .  | .              | .          | .    | .        | .        | .                         |
| 0 | 0. | NA           | .  | MAC EUK, TRAN. | .          | .    | .        | .        | REACTOME_TRANSLATION;RE   |
| 0 | 0. | NA           | .  | .              | .          | .    | .        | .        | .                         |
| 0 | 0. | NA           | .  | .              | .          | .    | .        | .        | .                         |
| 0 | 0. | NA           | .  | SYS MEN/ ENZY. | .          | .    | .        | .        | .                         |
| 0 | 0. | NA           | .  | .              | .          | .    | .        | .        | .                         |
| 0 | 0  | Cardiofacic  | NA | .              | SIGN.      | PHOS | KEC      | PID, BIO | (REACTOME_SIGNALLING_BY_I |
| 0 | 0. | NA           | .  | .              | SIGN.      | .    | KEC      | PID, BIO | (REACTOME_SIGNALLING_BY_I |
| 0 | 0. | NA           | .  | .              | .          | .    | .        | .        | .                         |
| 0 | 0. | NA           | .  | .              | .          | .    | .        | .        | .                         |
| 0 | 0. | NA           | .  | EST/INTRCATI   | (KEC.      | .    | .        | .        | REACTOME_TRANSMISSION_A   |
| 0 | 0. | NA           | .  | .              | .          | .    | .        | .        | .                         |
| 0 | 0  | Fanconi ar   | NA | .              | .          | .    | .        | PID.     | .                         |
| 0 | 0  | Arthrogryp   | NA | .              | EST/.      | .    | .        | .        | .                         |
| 0 | 0. | NA           | .  | .              | INTRLIPID. | .    | .        | .        | .                         |
| 0 | 0  | {Coronary    | NA | .              | MUS NUC.   | .    | .        | PID, BIO | (REACTOME_SIGNALLING_BY_I |
| 0 | 0. | NA           | .  | .              | .          | .    | KEC.     | .        | .                         |
| 0 | 0. | NA           | .  | .              | .          | .    | .        | .        | .                         |
| 0 | 0  | Osteopetr    | NA | .              | .          | .    | .        | .        | .                         |
| 0 | 0. | NA           | .  | .              | ORG PROT.  | .    | .        | .        | .                         |
| 0 | 0. | NA           | .  | .              | .          | .    | .        | .        | .                         |
| 0 | 0. | NA           | .  | SIGN INTR RECE | (KEC.      | .    | .        | BIO      | (.                        |
| 0 | 0. | NA           | .  | .              | .          | .    | .        | .        | .                         |
| 0 | 0. | NA           | .  | .              | .          | .    | .        | .        | .                         |
| 0 | 0. | NA           | .  | .              | .          | .    | .        | .        | .                         |
| 0 | 0. | NA           | .  | BIOF CYT       | (PHOS.     | .    | .        | .        | REACTOME_METABOLISM_OF_   |
| 0 | 0. | NA           | .  | BIOF CYT       | (TRAN.     | .    | PID, BIO | (        | REACTOME_INSULIN_RECEPT   |
| 0 | 0. | NA           | .  | .              | .          | .    | .        | .        | REACTOME_RNA_POL_III_TRA  |
| 0 | 0. | NA           | .  | .              | .          | .    | .        | .        | .                         |
| 0 | 0. | NA           | .  | EST/.          | PROT.      | .    | .        | .        | .                         |
| 0 | 0. | NA           | .  | EST/.          | PROT.      | .    | .        | .        | .                         |
| 0 | 0. | NA           | .  | .              | .          | .    | .        | .        | .                         |
| 0 | 0  | {Systemic    | NA | .              | INTR.      | .    | KEC      | PID, BIO | (REACTOME_CELL_SURFACE_I  |
| 0 | 0. | NA           | .  | .              | .          | .    | .        | .        | .                         |
| 0 | 0. | NA           | .  | .              | CYT        | (.   | .        | .        | REACTOME_ASSOCIATION_OF   |
| 0 | 0. | NA           | .  | .              | .          | .    | KEC.     | .        | .                         |
| 0 | 0. | NA           | .  | RNA NUC CATI   | (.         | .    | .        | .        | .                         |
| 0 | 0. | NA           | .  | .              | .          | .    | .        | .        | .                         |
| 0 | 0. | NA           | .  | .              | .          | .    | .        | .        | .                         |

|   |   |             |    |          |            |         |                         |                          |   |
|---|---|-------------|----|----------|------------|---------|-------------------------|--------------------------|---|
| 0 | 0 | NA          | .  | .        | .          | .       | .                       | .                        | . |
| 0 | 0 | NA          | .  | .        | .          | .       | .                       | .                        | . |
| 0 | 0 | Bleeding di | NA | EST/INTR | CATI(KEC.  | .       | .                       | REACTOME_ELEVATION_OF_C  |   |
| 0 | 0 | NA          | .  | .        | .          | .       | .                       | .                        | . |
| 0 | 0 | NA          | .  | SYS      | INTR.      | KEC.    | BIO(.                   | .                        | . |
| 0 | 0 | NA          | .  | .        | .          | KEC.    | .                       | .                        | . |
| 0 | 0 | NA          | .  | .        | MOT(KEC.   | .       | .                       | .                        | . |
| 0 | 0 | NA          | .  | GAM      | ORG.       | .       | .                       | .                        | . |
| 0 | 0 | Mitochondr  | NA | .        | .          | .       | .                       | .                        | . |
| 0 | 0 | NA          | .  | RNA      | ORGRNA_KEC | PID.    | .                       | REACTOME_DEVELOPMENTAL   |   |
| 0 | 0 | NA          | .  | .        | .          | .       | .                       | .                        | . |
| 0 | 0 | NA          | .  | .        | .          | .       | .                       | .                        | . |
| 0 | 0 | NA          | .  | .        | .          | .       | .                       | .                        | . |
| 0 | 0 | NA          | .  | .        | .          | .       | .                       | .                        | . |
| 0 | 0 | NA          | .  | .        | .          | .       | .                       | .                        | . |
| 0 | 0 | NA          | .  | .        | .          | .       | .                       | .                        | . |
| 0 | 0 | NA          | .  | NUC      | HIST(.     | .       | .                       | .                        | . |
| 0 | 0 | NA          | .  | NUC      | HIST(.     | .       | .                       | .                        | . |
| 0 | 0 | NA          | .  | REG      | ORG.       | .       | .                       | REACTOME_SIGNALING_BY_RI |   |
| 0 | 0 | NA          | .  | .        | .          | .       | .                       | .                        | . |
| 0 | 0 | NA          | .  | .        | .          | .       | .                       | .                        | . |
| 0 | 0 | NA          | .  | .        | .          | .       | .                       | .                        | . |
| 0 | 0 | Acetyl-CoA  | NA | .        | LIGA(KEC.  | BIO(    | REACTOME_TRIGLYCERIDE_B |                          |   |
| 0 | 0 | NA          | .  | EST/ORG. | .          | .       | .                       | .                        | . |
| 0 | 0 | NA          | .  | .        | .          | .       | .                       | .                        | . |
| 0 | 0 | NA          | .  | RNA      | NUC RNA_   | PID     | BIO(                    | REACTOME_DEVELOPMENTAL   |   |
| 0 | 0 | NA          | .  | .        | .          | .       | .                       | .                        | . |
| 0 | 0 | NA          | .  | .        | .          | .       | .                       | .                        | . |
| 0 | 0 | Ovalocytos  | NA | REG      | INTR       | ANIO.   | .                       | REACTOME_TRANSMEMBRANI   |   |
| 0 | 0 | NA          | .  | .        | .          | KEC.    | .                       | .                        | . |
| 0 | 0 | NA          | .  | MEM      | CATI(KEC   | PID.    | .                       | REACTOME_DEVELOPMENTAL   |   |
| 0 | 0 | NA          | .  | CYT(     | RECE.      | .       | .                       | .                        | . |
| 0 | 0 | NA          | .  | .        | .          | KEC.    | .                       | .                        | . |
| 0 | 0 | NA          | .  | .        | .          | KEC.    | .                       | .                        | . |
| 0 | 0 | NA          | .  | .        | .          | .       | .                       | .                        | . |
| 0 | 0 | Hemophag    | NA | .        | .          | .       | .                       | .                        | . |
| 0 | 0 | NA          | .  | .        | .          | .       | .                       | .                        | . |
| 0 | 0 | NA          | .  | SYS      | MEM        | MOL(KEC | PID                     | BIO(.                    |   |
| 0 | 0 | NA          | .  | .        | .          | .       | .                       | .                        | . |
| 0 | 0 | NA          | .  | REG      | INTR.      | .       | .                       | .                        | . |
| 0 | 0 | NA          | .  | .        | .          | .       | .                       | .                        | . |
| 0 | 0 | NA          | .  | .        | .          | .       | .                       | .                        | . |
| 0 | 0 | NA          | .  | CYT(     | OXID.      | .       | .                       | .                        | . |
| 0 | 0 | NA          | .  | .        | .          | .       | .                       | .                        | . |
| 0 | 0 | NA          | .  | RNA      | NUC S_AD.  | .       | .                       | REACTOME_RNA_POL_II_TRAN |   |
| 0 | 0 | NA          | .  | .        | .          | .       | .                       | .                        | . |
| 0 | 0 | Scalp-ear-i | NA | .        | .          | .       | .                       | .                        | . |
| 0 | 0 | NA          | .  | .        | .          | .       | .                       | .                        | . |
| 0 | 0 | Pitt-Hopkin | NA | RNA      | NUC        | TRAN.   | PID.                    | REACTOME_DEVELOPMENTAL   |   |
| 0 | 0 | NA          | .  | .        | .          | .       | .                       | .                        | . |
| 0 | 0 | Osteolysis, | NA | POS.     | RECE       | KEC.    | BIO(.                   |                          |   |
| 0 | 0 | NA          | .  | .        | .          | .       | .                       | .                        | . |
| 0 | 0 | NA          | .  | .        | .          | .       | .                       | REACTOME_TRANSMEMBRANI   |   |

|   |    |             |     |            |           |          |      |   |   |                          |   |
|---|----|-------------|-----|------------|-----------|----------|------|---|---|--------------------------|---|
| 0 | 0. | NA          | .   | .          | .         | .        | .    | . | . | .                        | . |
| 0 | 0. | NA          | .   | .          | .         | .        | .    | . | . | REACTOME_SIGNALING_BY_R  |   |
| 0 | 0. | NA          | .   | .          | .         | .        | .    | . | . | REACTOME_SIGNALING_BY_R  |   |
| 0 | 0  | Leukemia,   | NA  | .          | RNA.      | PRO1.    | PID. | . | . | REACTOME_DEVELOPMENTAL   |   |
| 0 | 0  | Leukemia,   | NA  | .          | RNA.      | PRO1.    | PID. | . | . | REACTOME_DEVELOPMENTAL   |   |
| 0 | 0. | NA          | .   | .          | .         | .        | .    | . | . | .                        |   |
| 0 | 0. | NA          | .   | .          | .         | MET/KEC. | .    | . | . | .                        |   |
| 0 | 0. | NA          | .   | .          | .         | MET/KEC. | .    | . | . | .                        |   |
| 0 | 0. | NA          | .   | RNA.       | TRAN.     | PID.     | .    | . | . | .                        |   |
| 0 | 0. | NA          | .   | CHR NUC    | CHRC.     | .        | .    | . | . | .                        |   |
| 0 | 0. | NA          | .   | .          | .         | .        | .    | . | . | .                        |   |
| 0 | 0  | Hemophag    | NA  | .          | .         | .        | .    | . | . | .                        |   |
| 0 | 0  | {Reduced    | 1NA | .          | REG EXT   | ENZYKEC. | .    | . | . | REACTOME_DEVELOPMENTAL   |   |
| 0 | 0. | NA          | .   | .          | .         | .        | .    | . | . | .                        |   |
| 0 | 0. | NA          | .   | .          | .         | .        | .    | . | . | .                        |   |
| 0 | 0. | NA          | .   | .          | MEM.      | .        | .    | . | . | REACTOME_O_LINKED_GLYCC  |   |
| 0 | 0. | NA          | .   | .          | MEM.      | .        | .    | . | . | REACTOME_O_LINKED_GLYCC  |   |
| 0 | 0. | NA          | .   | .          | MEM.      | .        | .    | . | . | REACTOME_O_LINKED_GLYCC  |   |
| 0 | 0. | NA          | .   | .          | MEM.      | .        | .    | . | . | REACTOME_O_LINKED_GLYCC  |   |
| 0 | 0. | NA          | .   | .          | TRAN.     | .        | .    | . | . | .                        |   |
| 0 | 0. | NA          | .   | .          | .         | .        | .    | . | . | REACTOME_GENERIC_TRANSI  |   |
| 0 | 0. | NA          | .   | EST/.      | .         | .        | .    | . | . | .                        |   |
| 0 | 0. | NA          | .   | RNA OR     | RNA_.     | PID.     | BIO  | ( | . | REACTOME_SMAD2_SMAD3_S   |   |
| 0 | 0. | NA          | .   | .          | .         | .        | .    | . | . | .                        |   |
| 0 | 0. | NA          | .   | .          | .         | .        | .    | . | . | .                        |   |
| 0 | 0  | Thyroid dys | NA  | .          | INTRINOR. | .        | .    | . | . | REACTOME_METABOLISM_OF_  |   |
| 0 | 0. | NA          | .   | .          | .         | .        | .    | . | . | .                        |   |
| 0 | 0. | NA          | .   | .          | .         | .        | .    | . | . | .                        |   |
| 0 | 0. | NA          | .   | .          | .         | .        | .    | . | . | .                        |   |
| 0 | 0. | NA          | .   | .          | .         | .        | .    | . | . | .                        |   |
| 0 | 0. | NA          | .   | .          | .         | .        | .    | . | . | .                        |   |
| 0 | 0. | NA          | .   | .          | .         | .        | .    | . | . | .                        |   |
| 0 | 0. | NA          | .   | .          | .         | .        | .    | . | . | .                        |   |
| 0 | 0. | NA          | .   | .          | .         | .        | .    | . | . | .                        |   |
| 0 | 0. | NA          | .   | .          | .         | .        | .    | . | . | .                        |   |
| 0 | 0. | NA          | .   | CELI MEM   | RAS_KEC   | PID.     | BIO  | ( | . | REACTOME_SIGNALLING_BY_I |   |
| 0 | 0. | NA          | .   | .          | GLUT      | KEC.     | .    | . | . | REACTOME_TRANSMISSION_A  |   |
| 0 | 0. | NA          | .   | .          | GLUT      | KEC.     | .    | . | . | REACTOME_TRANSMISSION_A  |   |
| 0 | 0. | NA          | .   | .          | .         | .        | .    | . | . | .                        |   |
| 0 | 0. | NA          | .   | BEH.CELI   | ENZYKEC   | PID.     | .    | . | . | REACTOME_METABOLISM_OF_  |   |
| 0 | 0. | NA          | .   | BEH.CELI   | ENZYKEC   | PID.     | .    | . | . | REACTOME_METABOLISM_OF_  |   |
| 0 | 0. | NA          | .   | .          | .         | .        | .    | . | . | .                        |   |
| 0 | 0. | NA          | .   | SYS.       | TRAN.     | .        | .    | . | . | .                        |   |
| 0 | 0. | NA          | .   | .          | .         | .        | .    | . | . | .                        |   |
| 0 | 0. | NA          | .   | .          | .         | .        | .    | . | . | REACTOME_GENERIC_TRANSI  |   |
| 0 | 0. | NA          | .   | .          | .         | .        | .    | . | . | .                        |   |
| 0 | 0. | NA          | .   | .          | .         | .        | .    | . | . | .                        |   |
| 0 | 0. | NA          | .   | REG NUC    | RECE      | KEC.     | .    | . | . | .                        |   |
| 0 | 0. | NA          | .   | .          | SMAL.     | .        | .    | . | . | .                        |   |
| 0 | 0. | NA          | .   | .          | SMAL.     | .        | .    | . | . | .                        |   |
| 0 | 0. | NA          | .   | SIGN INTR. | .         | .        | .    | . | . | REACTOME_CELL_CELL_COMI  |   |
| 0 | 0  | Spinoceret  | NA  | .          | .         | .        | .    | . | . | .                        |   |











|   |    |              |    |   |       |      |       |      |      |                         |
|---|----|--------------|----|---|-------|------|-------|------|------|-------------------------|
| 0 | 0. | NA           | .  | . | .     | .    | .     | .    | .    |                         |
| 0 | 0. | NA           | .  | . | .     | .    | .     | .    | .    |                         |
| 0 | 0  | {Cerebral i  | NA | . | BIOF. | PHO  | KEC   | PID  | BIO( | REACTOME_GASTRIN_CREB_  |
| 0 | 0  | Tyrosinemi   | NA | . | CAR   | CYT( | OXID  | KEC. | .    | REACTOME_METABOLISM_OF_ |
| 0 | 0. | NA           | .  | . | .     | .    | .     | .    | .    |                         |
| 0 | 0. | NA           | .  | . | .     | .    | .     | .    | .    |                         |
| 0 | 0. | NA           | .  | . | .     | .    | .     | .    | .    |                         |
| 0 | 0. | NA           | .  | . | .     | .    | .     | .    | .    |                         |
| 0 | 0. | NA           | .  | . | .     | .    | .     | .    | .    |                         |
| 0 | 0. | NA           | .  | . | .     | .    | .     | .    | .    |                         |
| 0 | 0. | NA           | .  | . | .     | .    | .     | .    | .    |                         |
| 0 | 0. | NA           | .  | . | .     | .    | .     | .    | .    |                         |
| 0 | 0. | NA           | .  | . | .     | .    | .     | .    | .    |                         |
| 0 | 0. | NA           | .  | . | .     | .    | .     | .    | .    |                         |
| 0 | 0. | NA           | .  | . | .     | .    | .     | .    | .    |                         |
| 0 | 0. | NA           | .  | . | .     | .    | .     | .    | .    |                         |
| 0 | 0. | NA           | .  | . | .     | .    | .     | .    | .    |                         |
| 0 | 0. | NA           | .  | . | .     | .    | .     | .    | .    |                         |
| 0 | 0. | NA           | .  | . | .     | .    | .     | .    | .    |                         |
| 0 | 0. | NA           | .  | . | .     | .    | .     | .    | .    |                         |
| 0 | 0. | NA           | .  | . | .     | .    | .     | .    | .    |                         |
| 0 | 0. | NA           | .  | . | .     | .    | .     | .    | .    |                         |
| 0 | 0. | NA           | .  | . | .     | .    | .     | .    | .    |                         |
| 0 | 0. | NA           | .  | . | .     | .    | .     | .    | .    |                         |
| 0 | 0. | NA           | .  | . | .     | .    | .     | .    | .    |                         |
| 0 | 0. | NA           | .  | . | .     | .    | .     | .    | .    |                         |
| 0 | 0. | NA           | .  | . | .     | .    | .     | .    | .    |                         |
| 0 | 0. | NA           | .  | . | .     | .    | .     | .    | .    |                         |
| 0 | 0. | NA           | .  | . | .     | .    | .     | .    | .    |                         |
| 0 | 0. | NA           | .  | . | .     | .    | .     | .    | .    |                         |
| 0 | 0. | NA           | .  | . | .     | .    | .     | .    | .    |                         |
| 0 | 0. | NA           | .  | . | .     | .    | .     | .    | .    |                         |
| 0 | 0. | NA           | .  | . | .     | .    | .     | .    | .    |                         |
| 0 | 0. | NA           | .  | . | .     | .    | .     | .    | .    |                         |
| 0 | 0. | NA           | .  | . | .     | .    | .     | .    | .    |                         |
| 0 | 0. | NA           | .  | . | .     | .    | .     | .    | .    |                         |
| 0 | 0. | NA           | .  | . | .     | .    | .     | .    | .    |                         |
| 0 | 0. | NA           | .  | . | .     | .    | .     | .    | .    |                         |
| 0 | 0. | NA           | .  | . | .     | .    | .     | .    | .    |                         |
| 0 | 0. | NA           | .  | . | .     | .    | .     | .    | .    |                         |
| 0 | 0  | Cortical dy: | NA | . | MIC   | ORG  | STRL. | PID. | .    | REACTOME_CELL_CYCLE;REA |
| 0 | 0. | NA           | .  | . | .     | .    | .     | .    | .    | .                       |

|   |                |    |   |                    |   |         |   |   |                         |   |
|---|----------------|----|---|--------------------|---|---------|---|---|-------------------------|---|
| 0 | 0.             | NA | . | .                  | . | .       | . | . | .                       | . |
| 0 | 0.             | NA | . | .                  | . | .       | . | . | .                       | . |
| 0 | 0.             | NA | . | RESI               | . | .       | . | . | .                       | . |
| 0 | 0.             | NA | . | .                  | . | .       | . | . | .                       | . |
| 0 | 0.             | NA | . | IMMUNTR            | . | KECPID  | . | . | .                       | . |
| 0 | 0.             | NA | . | .                  | . | .       | . | . | .                       | . |
| 0 | 0.             | NA | . | .                  | . | .       | . | . | .                       | . |
| 0 | 0.             | NA | . | SEN:ORG            | . | .       | . | . | .                       | . |
| 0 | 0.             | NA | . | .                  | . | .       | . | . | .                       | . |
| 0 | 0.             | NA | . | .                  | . | .       | . | . | .                       | . |
| 0 | 0.             | NA | . | SIGNINTRRECEKEC    | . | .       | . | . | REACTOME_IMMUNOREGULAT  | . |
| 0 | 0.             | NA | . | .                  | . | .       | . | . | .                       | . |
| 0 | 0.             | NA | . | RNA NUC TRAN       | . | PID     | . | . | REACTOME_DEVELOPMENTAL  | . |
| 0 | 0.             | NA | . | .                  | . | .       | . | . | .                       | . |
| 0 | 0.             | NA | . | .                  | . | .       | . | . | .                       | . |
| 0 | 0.             | NA | . | .                  | . | .       | . | . | .                       | . |
| 0 | 0.             | NA | . | .                  | . | .       | . | . | .                       | . |
| 0 | 0.             | NA | . | .                  | . | .       | . | . | .                       | . |
| 0 | 0.             | NA | . | .                  | . | .       | . | . | .                       | . |
| 0 | 0.             | NA | . | .                  | . | .       | . | . | .                       | . |
| 0 | 0.             | NA | . | .                  | . | .       | . | . | .                       | . |
| 0 | 0.             | NA | . | .                  | . | .       | . | . | .                       | . |
| 0 | 0.             | NA | . | .                  | . | .       | . | . | .                       | . |
| 0 | 0.             | NA | . | CELLNONACTIIKECPID | . | .       | . | . | .                       | . |
| 0 | 0 Mental rete  | NA | . | .                  | . | .       | . | . | .                       | . |
| 0 | 0.             | NA | . | .                  | . | .       | . | . | .                       | . |
| 0 | 0.             | NA | . | .                  | . | .       | . | . | .                       | . |
| 0 | 0.             | NA | . | .                  | . | .       | . | . | .                       | . |
| 0 | 0.             | NA | . | .                  | . | .       | . | . | .                       | . |
| 0 | 0.             | NA | . | .                  | . | .       | . | . | .                       | . |
| 0 | 0.             | NA | . | .                  | . | .       | . | . | .                       | . |
| 0 | 0.             | NA | . | .                  | . | .       | . | . | .                       | . |
| 0 | 0.             | NA | . | .                  | . | .       | . | . | .                       | . |
| 0 | 0.             | NA | . | .                  | . | .       | . | . | .                       | . |
| 0 | 0.             | NA | . | .                  | . | .       | . | . | .                       | . |
| 0 | 0.             | NA | . | .                  | . | .       | . | . | .                       | . |
| 0 | 0.             | NA | . | .                  | . | .       | . | . | .                       | . |
| 0 | 0.             | NA | . | .                  | . | .       | . | . | .                       | . |
| 0 | 0.             | NA | . | .                  | . | .       | . | . | .                       | . |
| 0 | 0.             | NA | . | .                  | . | .       | . | . | .                       | . |
| 0 | 0.             | NA | . | .                  | . | .       | . | . | .                       | . |
| 0 | 0.             | NA | . | .                  | . | .       | . | . | .                       | . |
| 0 | 0.             | NA | . | .                  | . | .       | . | . | .                       | . |
| 0 | 0.             | NA | . | .                  | . | .       | . | . | .                       | . |
| 0 | 0.             | NA | . | .                  | . | .       | . | . | .                       | . |
| 0 | 0.             | NA | . | .                  | . | .       | . | . | .                       | . |
| 0 | 0.             | NA | . | BIOF               | . | KEC     | . | . | REACTOME_ANTIVIRAL_MECH | . |
| 0 | 0.             | NA | . | .                  | . | .       | . | . | .                       | . |
| 0 | 0.             | NA | . | .                  | . | .       | . | . | .                       | . |
| 0 | 0.             | NA | . | .                  | . | .       | . | . | .                       | . |
| 0 | 0.             | NA | . | .                  | . | .       | . | . | .                       | . |
| 0 | 0.             | NA | . | .                  | . | .       | . | . | .                       | . |
| 0 | 0.             | NA | . | .                  | . | .       | . | . | .                       | . |
| 0 | 0.             | NA | . | .                  | . | .       | . | . | .                       | . |
| 0 | 0.             | NA | . | POS                | . | .       | . | . | REACTOME_ACTIVATED_NOTC | . |
| 0 | 0.             | NA | . | REG CYT(NUCL       | . | PID.BIO | . | . | .                       | . |
| 0 | 0.             | NA | . | REG CYT(NUCL       | . | PID.BIO | . | . | .                       | . |
| 0 | 0.             | NA | . | REG CYT(NUCL       | . | PID.BIO | . | . | .                       | . |
| 0 | 0.             | NA | . | REG CYT(NUCL       | . | PID.BIO | . | . | .                       | . |
| 0 | 0 {Epilepsy, ( | NA | . | SIGNINTRGAB/KEC    | . | .       | . | . | .                       | . |



|   |   |              |                 |                |                                        |
|---|---|--------------|-----------------|----------------|----------------------------------------|
| 0 | 0 | NA           | ENZ' CELI PRO1. | PID.           |                                        |
| 0 | 0 | NA           |                 |                |                                        |
| 0 | 0 | NA           | SIGN.           | PHOS           | KEC PID BIO( REACTOME_SIGNALLING_BY_I  |
| 0 | 0 | Mental retz  | NA              | RNA NUC TRAN.  |                                        |
| 0 | 0 | NA           |                 |                |                                        |
| 0 | 0 | NA           | REG INTRCATI(   | KEC PID.       | REACTOME_HYALURONAN_UF                 |
| 0 | 0 | NA           | REG INTRCATI(   | KEC PID.       | REACTOME_HYALURONAN_UF                 |
| 0 | 0 | NA           |                 |                |                                        |
| 0 | 0 | NA           | ANA             |                |                                        |
| 0 | 0 | NA           | IMMI.           |                |                                        |
| 0 | 0 | NA           | NEG.            | KEC.           |                                        |
| 0 | 0 | NA           |                 |                |                                        |
| 0 | 0 | NA           |                 |                |                                        |
| 0 | 0 | SCID due t   | NA              | REG ORG PRO1   | KEC PID BIO( REACTOME_SIGNALING_BY_S   |
| 0 | 0 | NA           |                 |                |                                        |
| 0 | 0 | NA           |                 | NUC.           |                                        |
| 0 | 0 | NA           | MUL.            | DNA.           |                                        |
| 0 | 0 | Palmoplan    | NA              |                | PID.                                   |
| 0 | 0 | NA           |                 |                |                                        |
| 0 | 0 | NA           |                 |                |                                        |
| 0 | 0 | NA           |                 | CYT(           |                                        |
| 0 | 0 | NA           |                 | CYT(           |                                        |
| 0 | 0 | NA           |                 | CYT(           |                                        |
| 0 | 0 | NA           |                 |                |                                        |
| 0 | 0 | NA           | REG CYT(MRN).   |                |                                        |
| 0 | 0 | Ceroid lipo  | NA              | REG AXO THIO   | KEC.                                   |
| 0 | 0 | NA           |                 | CATI(          |                                        |
| 0 | 0 | NA           |                 | CATI(          |                                        |
| 0 | 0 | Deafness,    | NA              | EST).          | REACTOME_NEURONAL_SYST                 |
| 0 | 0 | Deafness,    | NA              | EST).          | REACTOME_NEURONAL_SYST                 |
| 0 | 0 | NA           |                 |                |                                        |
| 0 | 0 | NA           | RNA.            | SING.          | PID.                                   |
| 0 | 0 | NA           |                 | NUC.           | REACTOME_DEVELOPMENTAL                 |
| 0 | 0 | NA           |                 |                |                                        |
| 0 | 0 | NA           | BIOF.           | PHOS.          | PID.                                   |
| 0 | 0 | NA           |                 |                |                                        |
| 0 | 0 | Adenocarc    | NA              | DNA NUC.       | KEC.                                   |
| 0 | 0 | Spastic pai  | NA              | CAR INSC HYDF. |                                        |
| 0 | 0 | NA           | BIOF.           | NUC1           | KEC PID BIO( REACTOME_SPRY_REGULATIC   |
| 0 | 0 | NA           |                 |                |                                        |
| 0 | 0 | NA           |                 |                |                                        |
| 0 | 0 | NA           |                 |                |                                        |
| 0 | 0 | {Myocardia   | NA              | EST).          | RECE. PID.                             |
| 0 | 0 | NA           |                 | RNA NUC SPEC.  | REACTOME_PLATELET_HOME                 |
| 0 | 0 | NA           |                 |                |                                        |
| 0 | 0 | Hyperchole   | NA              | REG EXTISERII. |                                        |
| 0 | 0 | NA           | BIOF.           |                | KEC PID BIO( REACTOME_ACTIVATED_AMPH   |
| 0 | 0 | Ciliary dysl | NA              |                | PID.                                   |
| 0 | 0 | NA           |                 |                | KEC PID BIO( REACTOME_IL_7_SIGNALING;F |
| 0 | 0 | NA           |                 |                |                                        |
| 0 | 0 | NA           | CELI CYT(       | KEC.           |                                        |
| 0 | 0 | NA           | PRO ORGLIPID    | KEC.           | REACTOME_METABOLISM_OF_                |
| 0 | 0 | NA           |                 | INTRG_PF.      |                                        |

|   |    |              |    |                          |                          |                         |                          |   |                        |
|---|----|--------------|----|--------------------------|--------------------------|-------------------------|--------------------------|---|------------------------|
| 0 | 0. | NA           | .  | .                        | .                        | .                       | .                        | . | .                      |
| 0 | 0. | NA           | .  | INTRG_PF.                | .                        | .                       | .                        | . | .                      |
| 0 | 0. | NA           | .  | REG INTR LIPID KE C PID. | BIO(                     | REACTOME_GASTRIN_CREB_5 |                          |   |                        |
| 0 | 0. | NA           | .  | .                        | .                        | .                       | .                        | . | .                      |
| 0 | 0. | NA           | .  | ENZ' INTR CARE.          | PID.                     | BIO(                    |                          |   |                        |
| 0 | 0  | Cone-rod c   | NA | EST/ CELI NUCI KE C.     | .                        | REACTOME_ABC_FAMILY_PRC |                          |   |                        |
| 0 | 0  | Cone-rod c   | NA | EST/ CELI NUCI KE C.     | .                        | REACTOME_ABC_FAMILY_PRC |                          |   |                        |
| 0 | 0. | NA           | .  | .                        | .                        | .                       | .                        | . | .                      |
| 0 | 0  | Fibrochonc   | NA | SYS' PRO.                | KE C PID.                | REACTOME_EXTRACELLULAR  |                          |   |                        |
| 0 | 0. | NA           | .  | .                        | KE C.                    | .                       | .                        | . | .                      |
| 0 | 0. | NA           | .  | .                        | .                        | .                       | .                        | . | .                      |
| 0 | 0. | NA           | .  | .                        | .                        | .                       | .                        | . | .                      |
| 0 | 0  | Megakaryc    | NA | .                        | .                        | .                       | .                        | . | .                      |
| 0 | 0. | NA           | .  | AMIN.                    | CARE KE C.               | .                       | .                        | . | .                      |
| 0 | 0. | NA           | .  | .                        | .                        | .                       | .                        | . | .                      |
| 0 | 0. | NA           | .  | .                        | .                        | .                       | .                        | . | .                      |
| 0 | 0. | NA           | .  | .                        | .                        | .                       | .                        | . | REACTOME_PRE_NOTCH_TRA |
| 0 | 0. | NA           | .  | POS.                     | HYDF.                    | PID.                    | REACTOME_SIGNALING_BY_RI |   |                        |
| 0 | 0. | NA           | .  | .                        | KE C PID.                | .                       | .                        | . | .                      |
| 0 | 0  | Myoadenyl    | NA | .                        | HYDF KE C.               | REACTOME_METABOLISM_OF_ |                          |   |                        |
| 0 | 0  | Myoadenyl    | NA | .                        | HYDF KE C.               | REACTOME_METABOLISM_OF_ |                          |   |                        |
| 0 | 0  | Bamforth-L   | NA | RNA NUC                  | HYDF.                    | .                       | .                        | . | .                      |
| 0 | 0. | NA           | .  | NUC.                     | .                        | .                       | .                        | . | .                      |
| 0 | 0. | NA           | .  | .                        | .                        | .                       | .                        | . | .                      |
| 0 | 0  | Alagille syr | NA | REG INTR SPEC KE C PID.  | REACTOME_PRE_NOTCH_TRA   |                         |                          |   |                        |
| 0 | 0  | Alagille syr | NA | REG INTR SPEC KE C PID.  | REACTOME_PRE_NOTCH_TRA   |                         |                          |   |                        |
| 0 | 0. | NA           | .  | .                        | .                        | .                       | .                        | . | .                      |
| 0 | 0. | NA           | .  | .                        | .                        | .                       | .                        | . | .                      |
| 0 | 0. | NA           | .  | .                        | .                        | .                       | .                        | . | .                      |
| 0 | 0. | NA           | .  | .                        | .                        | .                       | .                        | . | .                      |
| 0 | 0. | NA           | .  | EST/.                    | KE C.                    | .                       | .                        | . | .                      |
| 0 | 0. | NA           | .  | .                        | .                        | .                       | .                        | . | .                      |
| 0 | 0. | NA           | .  | .                        | .                        | .                       | .                        | . | .                      |
| 0 | 0. | NA           | .  | RNA NUC NUCI KE C.       | REACTOME_RNA_POL_III_TRA |                         |                          |   |                        |
| 0 | 0. | NA           | .  | .                        | .                        | .                       | .                        | . | .                      |
| 0 | 0. | NA           | .  | .                        | .                        | .                       | .                        | . | .                      |
| 0 | 0. | NA           | .  | .                        | KE C.                    | REACTOME_MITOCHONDRIAL  |                          |   |                        |
| 0 | 0. | NA           | .  | PHO CYT( PHO5 KE C PID.  | REACTOME_SYNTHESIS_OF_F  |                         |                          |   |                        |
| 0 | 0. | NA           | .  | .                        | .                        | .                       | .                        | . | .                      |
| 0 | 0. | NA           | .  | .                        | .                        | .                       | .                        | . | .                      |
| 0 | 0. | NA           | .  | MUL.                     | RECE.                    | .                       | .                        | . | .                      |
| 0 | 0. | NA           | .  | .                        | .                        | .                       | .                        | . | .                      |
| 0 | 0. | NA           | .  | RNA NUC.                 | .                        | .                       | .                        | . | .                      |
| 0 | 0. | NA           | .  | .                        | .                        | .                       | .                        | . | .                      |
| 0 | 0. | NA           | .  | .                        | KE C.                    | REACTOME_IMMUNE_SYSTEM  |                          |   |                        |
| 0 | 0. | NA           | .  | INTR.                    | .                        | REACTOME_MITOCHONDRIAL  |                          |   |                        |
| 0 | 0. | NA           | .  | RNA CELI RNA_ KE C.      | .                        | .                       | .                        | . | .                      |
| 0 | 0. | NA           | .  | .                        | .                        | .                       | .                        | . | .                      |
| 0 | 0. | NA           | .  | RNA NUC TRAN.            | REACTOME_CELL_CYCLE;REA  |                         |                          |   |                        |
| 0 | 0. | NA           | .  | RNA.                     | RAS_ KE C PID.           | BIO(                    | REACTOME_SIGNALING_BY_RI |   |                        |
| 0 | 0. | NA           | .  | .                        | .                        | .                       | .                        | . | .                      |
| 0 | 0. | NA           | .  | .                        | .                        | .                       | .                        | . | .                      |
| 0 | 0. | NA           | .  | INTR.                    | KE C.                    | .                       | .                        | . | .                      |

|   |   |                  |              |             |                          |     |                         |
|---|---|------------------|--------------|-------------|--------------------------|-----|-------------------------|
| 0 | 0 | NA               | DEFI         | PID         | REACTOME_INNATE_IMMUNE   |     |                         |
| 0 | 0 | NA               | SYS          |             |                          |     |                         |
| 0 | 0 | NA               |              |             |                          |     |                         |
| 0 | 0 | NA               | REG          | GTPA        | REACTOME_SIGNALING_BY_G  |     |                         |
| 0 | 0 | Leukemia, NA     | RNA NUC      | PID         |                          |     |                         |
| 0 | 0 | NA               | NEG NUC TRAN | PID         | REACTOME_RNA_POL_III_TRA |     |                         |
| 0 | 0 | NA               |              |             |                          |     |                         |
| 0 | 0 | Platelet alp NA  | ORG          | KEC PID BIO | REACTOME_CELL_SURFACE_I  |     |                         |
| 0 | 0 | NA               | CYT          |             |                          |     |                         |
| 0 | 0 | NA               |              |             |                          |     |                         |
| 0 | 0 | NA               | PRO          | MET         | REACTOME_DIABETES_PATHV  |     |                         |
| 0 | 0 | NA               |              |             |                          |     |                         |
| 0 | 0 | Leukemia, NA     | BIOF         | CAT         | REACTOME_DEVELOPMENTAL   |     |                         |
| 0 | 0 | Nephrotic s NA   | EST          | INTR        | PID                      |     |                         |
| 0 | 0 | NA               |              |             |                          |     |                         |
| 0 | 0 | NA               | CELI MEM     | CAT         | KEC                      |     |                         |
| 0 | 0 | NA               |              |             |                          |     |                         |
| 0 | 0 | NA               |              |             |                          |     |                         |
| 0 | 0 | NA               |              | KEC         |                          |     |                         |
| 0 | 0 | NA               | NUC ORG      | KEC         | REACTOME_METABOLISM_OF   |     |                         |
| 0 | 0 | Leber conç NA    | ANA          |             |                          |     |                         |
| 0 | 0 | NA               |              |             |                          |     |                         |
| 0 | 0 | NA               |              |             |                          |     |                         |
| 0 | 0 | Hypokalerr NA    | SYS          | MEM         | CAT                      | KEC | REACTOME_DEVELOPMENTAL  |
| 0 | 0 | NA               |              |             |                          |     |                         |
| 0 | 0 | NA               | EST          | ORG         |                          |     | REACTOME_MITOCHONDRIAL  |
| 0 | 0 | NA               |              |             | KEC                      |     | REACTOME_PHOSPHOLIPID_M |
| 0 | 0 | ?Epilepsy, NA    |              | INTR        | KEC                      |     | REACTOME_DEVELOPMENTAL  |
| 0 | 0 | NA               |              |             | KEC PID                  |     | REACTOME_REGULATION_OF  |
| 0 | 0 | NA               |              |             |                          |     |                         |
| 0 | 0 | NA               |              |             | KEC                      |     | REACTOME_DEVELOPMENTAL  |
| 0 | 0 | Cortisone r NA   |              |             | KEC                      |     | REACTOME_METABOLISM_OF  |
| 0 | 0 | NA               |              |             |                          |     |                         |
| 0 | 0 | NA               |              |             |                          |     |                         |
| 0 | 0 | Ataxia, pos NA   | EST          | INTR        |                          |     | REACTOME_TRANSMEMBRANI  |
| 0 | 0 | NA               | SIG          | PHO         |                          |     |                         |
| 0 | 0 | Choanal at NA    | BIOF         | PRO         |                          |     |                         |
| 0 | 0 | Choanal at NA    | BIOF         | PRO         |                          |     |                         |
| 0 | 0 | Retinitis piç NA | REG          | PRO         | PRO                      |     |                         |
| 0 | 0 | Retinitis piç NA | REG          | PRO         | PRO                      |     |                         |
| 0 | 0 | Retinitis piç NA | REG          | PRO         | PRO                      |     |                         |
| 0 | 0 | NA               | RNA          | PRO         |                          |     | REACTOME_GENERIC_TRANS  |
| 0 | 0 | Hypermanç NA     |              |             |                          |     |                         |
| 0 | 0 | NA               |              |             | KEC                      |     | REACTOME_MITOCHONDRIAL  |
| 0 | 0 | NA               |              |             | KEC                      |     | REACTOME_MITOCHONDRIAL  |
| 0 | 0 | NA               |              |             |                          |     |                         |
| 0 | 0 | NA               |              |             |                          |     |                         |
| 0 | 0 | NA               |              | NUC         | NUCL                     |     |                         |
| 0 | 0 | NA               |              |             |                          |     |                         |
| 0 | 0 | Left-right a NA  | ENZ          |             | KEC                      |     | REACTOME_DEVELOPMENTAL  |
| 0 | 0 | NA               |              |             |                          |     |                         |
| 0 | 0 | Coenzyme NA      |              |             |                          |     |                         |
| 0 | 0 | NA               |              |             | PID                      |     | REACTOME_SIGNALING_BY_R |
| 0 | 0 | NA               |              |             |                          |     |                         |

|   |   |            |              |          |       |     |                               |                          |
|---|---|------------|--------------|----------|-------|-----|-------------------------------|--------------------------|
| 0 | 0 | NA         | PRO          | PRO1     |       |     |                               |                          |
| 0 | 0 | NA         | EST/INTRCATI |          |       |     | REACTOME_NEURONAL_SYST        |                          |
| 0 | 0 | Arrhythmoc | REG MEM/CATI | KEC      |       | BIO |                               |                          |
| 0 | 0 | NA         |              |          |       |     |                               |                          |
| 0 | 0 | Megalence  | BIOF         |          | KEC   | PID | REACTOME_SIGNALLING_BY_I      |                          |
| 0 | 0 | NA         |              |          |       |     |                               |                          |
| 0 | 0 | NA         |              |          |       |     | REACTOME_GENERIC_TRANS        |                          |
| 0 | 0 | NA         |              |          |       |     |                               |                          |
| 0 | 0 | Thrombocy  |              | INTR     | KEC   |     | REACTOME_METABOLISM_OF        |                          |
| 0 | 0 | NA         |              |          |       |     |                               |                          |
| 0 | 0 | NA         |              |          |       |     |                               |                          |
| 0 | 0 | NA         |              |          |       |     |                               |                          |
| 0 | 0 | NA         |              |          |       |     |                               |                          |
| 0 | 0 | NA         |              |          | KEC   |     | REACTOME_ACYL_CHAIN_REM       |                          |
| 0 | 0 | Inflammatc | CELI INTR    |          | KEC   | PID | BIO( REACTOME_SIGNALLING_BY_I |                          |
| 0 | 0 | NA         |              |          |       |     |                               |                          |
| 0 | 0 | NA         |              |          |       |     |                               |                          |
| 0 | 0 | NA         |              |          |       |     |                               |                          |
| 0 | 0 | NA         |              |          |       |     |                               |                          |
| 0 | 0 | NA         | EST/         | CATI     |       |     | REACTOME_NEURONAL_SYST        |                          |
| 0 | 0 | NA         |              |          |       |     |                               |                          |
| 0 | 0 | NA         |              | MOLE     |       | PID |                               |                          |
| 0 | 0 | NA         |              | NUC PRO1 |       | PID | BIO( REACTOME_DEVELOPMENTAL   |                          |
| 0 | 0 | NA         |              |          |       |     |                               |                          |
| 0 | 0 | NA         |              |          | LIGA  | KEC | PID                           | REACTOME_METABOLISM_OF   |
| 0 | 0 | NA         |              |          | LIGA  | KEC | PID                           | REACTOME_METABOLISM_OF   |
| 0 | 0 | NA         |              |          |       |     |                               |                          |
| 0 | 0 | {Neuroblas | SYS          | INTR     | TRAN  |     |                               |                          |
| 0 | 0 | NA         | CELI         |          |       | KEC |                               |                          |
| 0 | 0 | NA         |              |          |       |     |                               |                          |
| 0 | 0 | NA         |              |          |       |     |                               |                          |
| 0 | 0 | NA         |              |          |       | PID |                               |                          |
| 0 | 0 | NA         | EST/INTRCATI |          |       | KEC |                               | REACTOME_TRANSMEMBRANI   |
| 0 | 0 | Leigh synd | EST/ORG      | MICR     |       |     |                               |                          |
| 0 | 0 | NA         |              |          |       |     |                               |                          |
| 0 | 0 | NA         |              |          |       |     |                               |                          |
| 0 | 0 | NA         |              | ORG      | ACTII |     | PID                           | REACTOME_DEVELOPMENTAL   |
| 0 | 0 | NA         |              | ORG      | ACTII |     | PID                           | REACTOME_DEVELOPMENTAL   |
| 0 | 0 | NA         | SYS          | ORG      |       |     | PID                           | REACTOME_SIGNALLING_BY_I |
| 0 | 0 | Doyme hon  | SEN          | PRO      |       |     |                               |                          |
| 0 | 0 | NA         |              |          |       |     |                               |                          |
| 0 | 0 | NA         |              |          |       |     |                               |                          |
| 0 | 0 | NA         |              |          |       |     |                               |                          |
| 0 | 0 | NA         | GLU          |          | NUCI  | KEC |                               | REACTOME_BIOLOGICAL_OXII |
| 0 | 0 | NA         |              |          |       |     |                               | REACTOME_SIGNALING_BY_IL |
| 0 | 0 | NA         |              |          |       |     |                               | REACTOME_SIGNALING_BY_RI |
| 0 | 0 | GAPO syn   |              |          |       |     | PID                           |                          |
| 0 | 0 | NA         |              |          | ACTII |     |                               |                          |
| 0 | 0 | NA         | AMIN         |          |       | KEC |                               |                          |
| 0 | 0 | Miyoshi mt | SYS          | MEM      |       |     |                               |                          |
| 0 | 0 | NA         |              |          |       |     |                               |                          |
| 0 | 0 | NA         |              |          |       |     |                               |                          |
| 0 | 0 | NA         |              |          |       |     |                               |                          |
| 0 | 0 | NA         | ISO          | ORG      | OXID  | KEC |                               |                          |

|   |   |              |    |               |                   |                               |
|---|---|--------------|----|---------------|-------------------|-------------------------------|
| 0 | 0 | Pseudoxar    | NA | REG INTRLYAS. |                   | REACTOME_PTM_GAMMA_CAF        |
| 0 | 0 |              | NA | MUS MEM.      | KEC.              |                               |
| 0 | 0 |              | NA |               |                   |                               |
| 0 | 0 |              | NA |               |                   |                               |
| 0 | 0 |              | NA |               |                   |                               |
| 0 | 0 |              | NA |               |                   |                               |
| 0 | 0 |              | NA |               |                   |                               |
| 0 | 0 |              | NA |               |                   |                               |
| 0 | 0 |              | NA |               |                   |                               |
| 0 | 0 |              | NA |               |                   |                               |
| 0 | 0 |              | NA |               |                   |                               |
| 0 | 0 |              | NA |               |                   |                               |
| 0 | 0 |              | NA |               |                   |                               |
| 0 | 0 |              | NA |               |                   |                               |
| 0 | 0 |              | NA |               |                   |                               |
| 0 | 0 |              | NA | PRO.          |                   |                               |
| 0 | 0 | Retinitis pi | NA | RNA ORGHYDF   | KEC.              | REACTOME_PROCESSING_OF        |
| 0 | 0 |              | NA |               |                   |                               |
| 0 | 0 |              | NA |               |                   |                               |
| 0 | 0 |              | NA |               |                   |                               |
| 0 | 0 |              | NA |               |                   |                               |
| 0 | 0 |              | NA | MUL NUC.      |                   |                               |
| 0 | 0 |              | NA | SIGN MEM.     | KEC PID BIO       |                               |
| 0 | 0 |              | NA | ENZ MEM SMAI. | PID.              |                               |
| 0 | 0 |              | NA |               |                   |                               |
| 0 | 0 | Colorectal   | NA | MITC ORG.     | KEC PID.          | REACTOME_CELL_CYCLE;REA       |
| 0 | 0 |              | NA |               |                   |                               |
| 0 | 0 |              | NA |               |                   |                               |
| 0 | 0 |              | NA |               |                   |                               |
| 0 | 0 |              | NA |               |                   |                               |
| 0 | 0 |              | NA | CELI.         |                   |                               |
| 0 | 0 |              | NA | SIGN.         | GTP_KEC PID.      | REACTOME_SIGNALLING_BY_I      |
| 0 | 0 | Thrombop     | NA | REG.          | SERII KEC PID BIO | REACTOME_PTM_GAMMA_CAF        |
| 0 | 0 |              | NA |               |                   |                               |
| 0 | 0 |              | NA | LIPII ORGLIPA | KEC.              | REACTOME_GLYCOSPHINGOL        |
| 0 | 0 |              | NA |               |                   |                               |
| 0 | 0 |              | NA |               |                   |                               |
| 0 | 0 |              | NA | SIGN INTR.    |                   | REACTOME_SIGNALING_BY_G       |
| 0 | 0 |              | NA |               |                   |                               |
| 0 | 0 |              | NA | EST/.         |                   |                               |
| 0 | 0 | Nemaline r   | NA | SAR STRL.     |                   | REACTOME_STRIATED_MUSCI       |
| 0 | 0 |              | NA |               | KEC PID.          | REACTOME_MEMBRANE_TRAF        |
| 0 | 0 |              | NA |               |                   |                               |
| 0 | 0 |              | NA |               | KEC.              |                               |
| 0 | 0 |              | NA |               |                   |                               |
| 0 | 0 |              | NA |               |                   |                               |
| 0 | 0 |              | NA | IMMI.         | SERII.            | REACTOME_INTEGRATION_OF       |
| 0 | 0 |              | NA | IMMI.         | SERII.            | REACTOME_INTEGRATION_OF       |
| 0 | 0 |              | NA |               |                   |                               |
| 0 | 0 | Cholestasi   | NA | EST/ INTRCATI | KEC.              | BIO( REACTOME_BILE_ACID_AND_E |
| 0 | 0 | Bardet-Bie   | NA |               |                   |                               |
| 0 | 0 |              | NA |               |                   |                               |



|   |   |             |      |      |      |       |                         |
|---|---|-------------|------|------|------|-------|-------------------------|
| 0 | 0 | NA          |      |      |      |       |                         |
| 0 | 0 | NA          |      |      | KEC  |       | REACTOME_CELL_CYCLE;REA |
| 0 | 0 | NA          | SIGN | CELI | GTP  | KEC   | REACTOME_INTEGRIN_CELL_ |
| 0 | 0 | Wiskott-Alk | NA   | MAC  | NON  | ACTII | PID                     |
| 0 | 0 | Multiple pt | NA   | REG  | INTR | CATI  | KEC                     |
| 0 | 0 | NA          |      |      |      |       |                         |
| 0 | 0 | Rhizomelic  | NA   | BIO  | CYT  | TRAN  | KEC                     |
| 0 | 0 | Pigmented   | NA   | SIGN |      |       | KEC                     |
| 0 | 0 | Cardiomyo   | NA   | MUS  | ORG  | NUCL  | KEC                     |
| 0 | 0 | NA          |      |      |      |       |                         |
| 0 | 0 | NA          |      |      |      |       |                         |
| 0 | 0 | NA          |      |      |      |       |                         |
| 0 | 0 | NA          |      |      |      | KEC   | PID                     |
| 0 | 0 | Ehlers-Dar  | NA   | SYS  | PRO  |       | KEC                     |
| 0 | 0 | NA          |      |      |      |       |                         |
| 0 | 0 | Candidiasi  | NA   | RNA  | CYT  | RECE  | KEC                     |
| 0 | 0 | NA          |      |      | CYT  | LIPID |                         |
| 0 | 0 | NA          |      |      | CELI | NUC   | NUCL                    |
| 0 | 0 | NA          |      |      |      |       |                         |
| 0 | 0 | 3MC syndr   | NA   | CELI |      | PHO   |                         |
| 0 | 0 | NA          |      |      |      |       |                         |
| 0 | 0 | NA          |      |      |      |       |                         |
| 0 | 0 | NA          |      |      |      |       |                         |
| 0 | 0 | NA          |      |      |      |       | REACTOME_TRANSLATION;RE |
| 0 | 0 | NA          |      |      | SYS  | INTR  | INTE                    |
| 0 | 0 | Cataract 4, | NA   | SEN  |      |       |                         |
| 0 | 0 | NA          |      |      |      |       |                         |
| 0 | 0 | NA          |      |      |      |       |                         |
| 0 | 0 | NA          |      |      |      |       |                         |
| 0 | 0 | NA          |      |      |      |       |                         |
| 0 | 0 | Carbamoyl   | NA   |      | CYT  | LIGA  | KEC                     |
| 0 | 0 | NA          |      |      |      |       | PID                     |
| 0 | 0 | NA          |      |      |      |       | BIO                     |
| 0 | 0 | NA          |      |      |      |       |                         |
| 0 | 0 | {Buruli ulc | NA   | MUL  | INTR |       | KEC                     |
| 0 | 0 | Cholestasi  | NA   | MAC  |      |       |                         |
| 0 | 0 | NA          |      |      |      |       |                         |
| 0 | 0 | NA          |      |      |      |       |                         |
| 0 | 0 | Spinal mus  | NA   | PRO  |      | UNFC  |                         |
| 0 | 0 | ?Muscular   | NA   | ORG  | SAR  | STRU  | KEC                     |
| 0 | 0 | NA          |      |      | MUS  | NUC   |                         |
| 0 | 0 | NA          |      |      | SIGN | INTR  | KEC                     |
| 0 | 0 | {Coronary   | NA   | ENZ  | VESI | PRO   | KEC                     |
| 0 | 0 | NA          |      |      |      |       | PID                     |
| 0 | 0 | NA          |      |      |      |       | BIO                     |
| 0 | 0 | NA          |      |      |      |       |                         |
| 0 | 0 | NA          |      |      | REG  | INTR  | NEUF                    |
| 0 | 0 | Perlman sy  | NA   |      |      |       | KEC                     |
| 0 | 0 | Perlman sy  | NA   |      |      |       |                         |
| 0 | 0 | NA          |      |      |      |       | KEC                     |
| 0 | 0 | NA          |      |      | SIGN |       | PHO                     |
| 0 | 0 | NA          |      |      |      |       | KEC                     |
| 0 | 0 | NA          |      |      |      |       | PID                     |
| 0 | 0 | NA          |      |      |      |       |                         |
| 0 | 0 | NA          |      |      |      |       |                         |
| 0 | 0 | Advanced    | NA   | RHY  |      |       | KEC                     |
| 0 | 0 | NA          |      |      |      |       | PID                     |
| 0 | 0 | NA          |      |      |      |       | REACTOME_BMAL1_CLOCK_NI |

|   |   |                             |    |               |      |     |     |                         |                                                      |
|---|---|-----------------------------|----|---------------|------|-----|-----|-------------------------|------------------------------------------------------|
| 0 | 0 | NA                          | .  | .             | .    | .   | .   | .                       | .                                                    |
| 0 | 0 | Mental retardation          | NA | EST/ORG       | .    | .   | .   | .                       | .                                                    |
| 0 | 0 | Mental retardation          | NA | EST/ORG       | .    | .   | .   | .                       | .                                                    |
| 0 | 0 |                             | NA | .             | .    | .   | .   | .                       | .                                                    |
| 0 | 0 |                             | NA | .             | .    | .   | .   | .                       | .                                                    |
| 0 | 0 |                             | NA | .             | .    | .   | .   | .                       | .                                                    |
| 0 | 0 |                             | NA | SIGNINTR      | .    | .   | .   | .                       | .                                                    |
| 0 | 0 |                             | NA | SYS           | .    | .   | PID | .                       | REACTOME_DEVELOPMENTAL                               |
| 0 | 0 |                             | NA | .             | .    | .   | .   | .                       | .                                                    |
| 0 | 0 |                             | NA | .             | .    | .   | .   | .                       | .                                                    |
| 0 | 0 |                             | NA | .             | .    | .   | .   | .                       | .                                                    |
| 0 | 0 |                             | NA | .             | .    | .   | .   | .                       | .                                                    |
| 0 | 0 | Atrioventricular conduction | NA | .             | .    | .   | .   | .                       | .                                                    |
| 0 | 0 | Fanconi anemia              | NA | .             | .    | .   | PID | BIO                     | REACTOME_REGULATION_OF_TRANSCRIPTION_FACTOR_ACTIVITY |
| 0 | 0 |                             | NA | .             | .    | .   | .   | .                       | REACTOME_TRANSMISSION_OF_CELL_TO_CELL_SIGNAL         |
| 0 | 0 |                             | NA | EST/ORG       | .    | .   | .   | .                       | .                                                    |
| 0 | 0 |                             | NA | .             | .    | .   | .   | .                       | .                                                    |
| 0 | 0 | Pontocerebellar hypoplasia  | NA | .             | .    | .   | .   | .                       | .                                                    |
| 0 | 0 | LEOPARD syndrome            | NA | CELL/ORG      | .    | KEC | PID | BIO                     | REACTOME_SIGNALLING_BY_TYROSINE_KINASE               |
| 0 | 0 |                             | NA | .             | .    | .   | KEC | PID                     | .                                                    |
| 0 | 0 |                             | NA | .             | .    | .   | .   | .                       | .                                                    |
| 0 | 0 |                             | NA | .             | .    | .   | .   | .                       | .                                                    |
| 0 | 0 |                             | NA | .             | .    | .   | .   | .                       | REACTOME_NEURONAL_SYSTEMS                            |
| 0 | 0 |                             | NA | RNA NUC       | .    | .   | .   | .                       | REACTOME_GENERIC_TRANSCRIPTION                       |
| 0 | 0 |                             | NA | NUC KINASE    | .    | .   | BIO | .                       | .                                                    |
| 0 | 0 |                             | NA | .             | .    | .   | .   | .                       | .                                                    |
| 0 | 0 |                             | NA | .             | .    | .   | .   | .                       | REACTOME_TRANSMEMBRANE SIGNALING                     |
| 0 | 0 | Colorectal adenoma          | NA | POS INTR TRAN | KEC  | PID | BIO | REACTOME_TGF_BETA_RECEI |                                                      |
| 0 | 0 |                             | NA | .             | .    | .   | .   | .                       | .                                                    |
| 0 | 0 |                             | NA | GLY(ORG TRAN  | KEC  | .   | .   | .                       | .                                                    |
| 0 | 0 |                             | NA | CELL          | .    | .   | .   | .                       | .                                                    |
| 0 | 0 |                             | NA | .             | .    | .   | .   | .                       | .                                                    |
| 0 | 0 | Colorectal adenoma          | NA | DNA           | SING | KEC | PID | .                       | REACTOME_MEIOSIS;REACTO                              |
| 0 | 0 |                             | NA | EST/ORG       | .    | .   | .   | .                       | .                                                    |
| 0 | 0 | Esophageal adenoma          | NA | NEG CYT       | .    | .   | .   | .                       | .                                                    |
| 0 | 0 |                             | NA | .             | .    | KEC | .   | .                       | .                                                    |
| 0 | 0 |                             | NA | EST/ORG       | .    | .   | .   | .                       | .                                                    |
| 0 | 0 |                             | NA | .             | .    | .   | .   | .                       | .                                                    |
| 0 | 0 |                             | NA | REG INTR      | KEC  | .   | .   | .                       | REACTOME_SIGNALING_BY_G                              |
| 0 | 0 |                             | NA | .             | .    | .   | .   | .                       | .                                                    |
| 0 | 0 |                             | NA | .             | .    | KEC | .   | .                       | .                                                    |
| 0 | 0 |                             | NA | .             | .    | .   | .   | .                       | .                                                    |
| 0 | 0 | EBD inversio                | NA | SYS PRO       | .    | .   | PID | .                       | REACTOME_EXTRACELLULAR                               |
| 0 | 0 |                             | NA | NUC           | .    | .   | .   | .                       | .                                                    |
| 0 | 0 |                             | NA | .             | .    | .   | .   | .                       | .                                                    |
| 0 | 0 |                             | NA | .             | .    | .   | .   | .                       | .                                                    |
| 0 | 0 |                             | NA | CYT(CYST      | .    | .   | .   | .                       | .                                                    |
| 0 | 0 |                             | NA | CELL NUC      | .    | .   | .   | .                       | .                                                    |
| 0 | 0 |                             | NA | .             | .    | .   | .   | .                       | .                                                    |
| 0 | 0 |                             | NA | .             | .    | KEC | .   | .                       | .                                                    |
| 0 | 0 |                             | NA | .             | .    | .   | .   | .                       | .                                                    |
| 0 | 0 |                             | NA | MITC          | RNA  | .   | PID | .                       | .                                                    |
| 0 | 0 |                             | NA | MITC          | RNA  | .   | PID | .                       | .                                                    |
| 0 | 0 |                             | NA | COF           | .    | KEC | PID | BIO                     | REACTOME_PPARA_ACTIVATE                              |

|   |    |              |    |       |              |       |                         |                         |     |                         |
|---|----|--------------|----|-------|--------------|-------|-------------------------|-------------------------|-----|-------------------------|
| 0 | 0. | NA           | .  | .     | KEC.         | .     | .                       |                         |     |                         |
| 0 | 0. | NA           | .  | .     | KEC.         | .     | .                       |                         |     |                         |
| 0 | 0. | NA           | .  | .     | KEC.         | .     | .                       |                         |     |                         |
| 0 | 0. | NA           | .  | .     | KEC.         | .     | .                       |                         |     |                         |
| 0 | 0. | NA           | .  | CHR.  | .            | .     | .                       |                         |     |                         |
| 0 | 0. | NA           | .  | CHR.  | .            | .     | .                       |                         |     |                         |
| 0 | 0  | Sinoatrial r | NA | .     | EST/MEM/CATI | KEC.  | .                       |                         |     |                         |
| 0 | 0. | NA           | .  | .     | .            | .     | .                       |                         |     |                         |
| 0 | 0. | NA           | .  | .     | KEC.         | .     | REACTOME_TRANSMISSION_A |                         |     |                         |
| 0 | 0. | NA           | .  | .     | KEC.         | .     | REACTOME_TRANSMISSION_A |                         |     |                         |
| 0 | 0  | Hypogonad    | NA | .     | .            | PID.  | REACTOME_SIGNALING_BY_F |                         |     |                         |
| 0 | 0. | NA           | .  | SIG   | NUC.         | KEC   | PID.                    |                         |     |                         |
| 0 | 0. | NA           | .  | .     | .            | .     | REACTOME_REGULATION_OF_ |                         |     |                         |
| 0 | 0. | NA           | .  | .     | .            | .     | .                       |                         |     |                         |
| 0 | 0. | NA           | .  | BIO   | CYT          | NUCL. | .                       |                         |     |                         |
| 0 | 0. | NA           | .  | GLY   | PRO.         | .     | .                       |                         |     |                         |
| 0 | 0. | NA           | .  | .     | .            | .     | .                       |                         |     |                         |
| 0 | 0  | Tietz albini | NA | .     | .            | TRAN  | KEC                     | PID.                    |     |                         |
| 0 | 0. | NA           | .  | .     | .            | .     | .                       |                         |     |                         |
| 0 | 0. | NA           | .  | .     | .            | PID.  | .                       |                         |     |                         |
| 0 | 0. | NA           | .  | .     | .            | .     | .                       |                         |     |                         |
| 0 | 0. | NA           | .  | .     | .            | .     | .                       |                         |     |                         |
| 0 | 0. | NA           | .  | GAM   | NUC.         | .     | .                       |                         |     |                         |
| 0 | 0. | NA           | .  | .     | .            | .     | .                       |                         |     |                         |
| 0 | 0. | NA           | .  | .     | .            | .     | .                       |                         |     |                         |
| 0 | 0. | NA           | .  | .     | .            | .     | .                       |                         |     |                         |
| 0 | 0. | NA           | .  | .     | .            | .     | .                       |                         |     |                         |
| 0 | 0. | NA           | .  | .     | .            | .     | .                       |                         |     |                         |
| 0 | 0. | NA           | .  | .     | .            | KEC.  | .                       |                         |     |                         |
| 0 | 0. | NA           | .  | .     | .            | .     | .                       |                         |     |                         |
| 0 | 0  | Urocanase    | NA | .     | .            | KEC.  | REACTOME_METABOLISM_OF_ |                         |     |                         |
| 0 | 0. | NA           | .  | MUL.  | RECE         | KEC.  | REACTOME_DEVELOPMENTAL  |                         |     |                         |
| 0 | 0. | NA           | .  | LIPII | INTRG_P      | F.    | .                       |                         |     |                         |
| 0 | 0. | NA           | .  | .     | .            | .     | .                       |                         |     |                         |
| 0 | 0. | NA           | .  | .     | .            | .     | .                       |                         |     |                         |
| 0 | 0. | NA           | .  | .     | .            | .     | .                       |                         |     |                         |
| 0 | 0. | NA           | .  | .     | .            | KEC.  | .                       |                         |     |                         |
| 0 | 0. | NA           | .  | .     | .            | .     | .                       |                         |     |                         |
| 0 | 0. | NA           | .  | .     | .            | .     | .                       |                         |     |                         |
| 0 | 0. | NA           | .  | .     | RAS_         | KEC   | PID.                    |                         |     |                         |
| 0 | 0. | NA           | .  | .     | TRAN         | KEC   | PID.                    |                         |     |                         |
| 0 | 0  | Cutaneous    | NA | .     | DNA.         | PRO   | KEC                     | PID.                    | BIO | REACTOME_MEIOSIS;REACTO |
| 0 | 0. | NA           | .  | .     | .            | .     | .                       | REACTOME_EXTRACELLULAR_ |     |                         |
| 0 | 0. | NA           | .  | .     | .            | .     | .                       | .                       |     |                         |
| 0 | 0. | NA           | .  | .     | .            | .     | .                       | .                       |     |                         |
| 0 | 0. | NA           | .  | MAC   | CYT          | TRAN. | PID.                    | .                       |     |                         |
| 0 | 0  | Combined     | NA | .     | .            | .     | .                       | .                       |     |                         |
| 0 | 0. | NA           | .  | .     | .            | .     | .                       | .                       |     |                         |
| 0 | 0. | NA           | .  | .     | .            | .     | .                       | .                       |     |                         |
| 0 | 0. | NA           | .  | .     | .            | .     | .                       | .                       |     |                         |
| 0 | 0. | NA           | .  | RNA.  | TRAN.        | PID.  | BIO                     | REACTOME_TRANSCRIPTIONA |     |                         |
| 0 | 0. | NA           | .  | .     | .            | .     | .                       | .                       |     |                         |
| 0 | 0. | NA           | .  | REG   | INTRC        | CATI  | KEC.                    | REACTOME_NEURONAL_SYST  |     |                         |
| 0 | 0. | NA           | .  | .     | CYST.        | .     | .                       | .                       |     |                         |

|   |   |             |    |              |              |      |      |     |                          |
|---|---|-------------|----|--------------|--------------|------|------|-----|--------------------------|
| 0 | 0 | NA          | .  | .            | .            | .    | .    | .   | .                        |
| 0 | 0 | 3-Methylcro | NA | .            | .            | .    | KEC. | .   | REACTOME_METABOLISM_OF   |
| 0 | 0 | NA          | .  | .            | .            | .    | .    | .   | .                        |
| 0 | 0 | NA          | .  | .            | .            | .    | .    | .   | .                        |
| 0 | 0 | NA          | .  | .            | .            | .    | .    | .   | .                        |
| 0 | 0 | NA          | .  | SYS          | ORGCATI      | .    | .    | .   | .                        |
| 0 | 0 | NA          | .  | CELIEXTIRECE | .            | .    | .    | .   | REACTOME_SIGNALING_BY_G  |
| 0 | 0 | Leukemia,   | NA | .            | .            | .    | PID. | .   | .                        |
| 0 | 0 | NA          | .  | .            | .            | .    | .    | .   | .                        |
| 0 | 0 | NA          | .  | .            | .            | .    | .    | .   | .                        |
| 0 | 0 | NA          | .  | .            | .            | .    | .    | .   | .                        |
| 0 | 0 | NA          | .  | .            | .            | .    | .    | .   | .                        |
| 0 | 0 | NA          | .  | .            | .            | .    | .    | .   | .                        |
| 0 | 0 | NA          | .  | .            | .            | .    | .    | .   | .                        |
| 0 | 0 | NA          | .  | .            | .            | .    | .    | .   | .                        |
| 0 | 0 | NA          | .  | .            | .            | .    | .    | .   | .                        |
| 0 | 0 | NA          | .  | .            | .            | .    | .    | .   | .                        |
| 0 | 0 | NA          | .  | .            | .            | .    | .    | .   | .                        |
| 0 | 0 | NA          | .  | VIRA         | TRAN         | KEC  | PID  | BIO | .                        |
| 0 | 0 | NA          | .  | .            | .            | .    | .    | .   | .                        |
| 0 | 0 | {?Bladder c | NA | .            | .            | .    | PID. | .   | .                        |
| 0 | 0 | NA          | .  | SIGNINTRCATI | .            | .    | .    | .   | .                        |
| 0 | 0 | NA          | .  | ANA          | .            | KEC. | .    | .   | .                        |
| 0 | 0 | NA          | .  | RNA          | TRAN         | PID. | .    | .   | .                        |
| 0 | 0 | Fetal akine | NA | .            | .            | .    | .    | .   | .                        |
| 0 | 0 | NA          | .  | .            | .            | .    | .    | .   | .                        |
| 0 | 0 | {Congestiv  | NA | .            | REG INTRAMIN | KEC. | .    | .   | .                        |
| 0 | 0 | Deafness,   | NA | .            | SYS INTR     | .    | .    | .   | REACTOME_DIABETES_PATHV  |
| 0 | 0 | NA          | .  | .            | .            | KEC. | BIO  | .   | .                        |
| 0 | 0 | NA          | .  | .            | .            | .    | .    | .   | .                        |
| 0 | 0 | NA          | .  | .            | .            | .    | .    | .   | .                        |
| 0 | 0 | NA          | .  | .            | .            | .    | .    | .   | .                        |
| 0 | 0 | NA          | .  | .            | .            | .    | .    | .   | .                        |
| 0 | 0 | NA          | .  | .            | .            | .    | .    | .   | .                        |
| 0 | 0 | COACH sy    | NA | .            | .            | .    | .    | .   | .                        |
| 0 | 0 | NA          | .  | .            | .            | .    | .    | .   | .                        |
| 0 | 0 | NA          | .  | .            | .            | .    | .    | .   | .                        |
| 0 | 0 | NA          | .  | .            | .            | .    | .    | .   | .                        |
| 0 | 0 | NA          | .  | BIOF         | ACID         | KEC. | .    | .   | REACTOME_NEGATIVE_REGUI  |
| 0 | 0 | NA          | .  | BIOF         | ACID         | KEC. | .    | .   | REACTOME_NEGATIVE_REGUI  |
| 0 | 0 | NA          | .  | .            | .            | .    | .    | .   | .                        |
| 0 | 0 | NA          | .  | SIGNCYT      | GTP          | KEC. | .    | .   | REACTOME_SIGNALING_BY_RI |
| 0 | 0 | NA          | .  | .            | .            | .    | .    | .   | .                        |
| 0 | 0 | NA          | .  | SIGNINTRGABA | KEC.         | .    | .    | .   | REACTOME_TRANSMISSION_A  |
| 0 | 0 | NA          | .  | .            | .            | .    | .    | .   | .                        |
| 0 | 0 | NA          | .  | .            | .            | .    | .    | .   | .                        |
| 0 | 0 | NA          | .  | .            | .            | .    | .    | .   | .                        |
| 0 | 0 | NA          | .  | .            | .            | .    | PID. | .   | REACTOME_DIABETES_PATHV  |
| 0 | 0 | NA          | .  | .            | .            | .    | .    | .   | .                        |
| 0 | 0 | NA          | .  | RES          | INTRPEPT     | .    | .    | .   | .                        |
| 0 | 0 | NA          | .  | LIPIE        | .            | KEC. | .    | .   | REACTOME_BIOLOGICAL_OXII |
| 0 | 0 | NA          | .  | .            | .            | .    | .    | .   | .                        |
| 0 | 0 | Renal tubu  | NA | .            | INTRCATI     | KEC. | .    | .   | REACTOME_TRANSMEMBRANI   |





|   |   |             |      |       |      |      |     |                         |                         |
|---|---|-------------|------|-------|------|------|-----|-------------------------|-------------------------|
| 0 | 0 | NA          | CYT  |       |      |      |     |                         |                         |
| 0 | 0 | NA          |      |       |      |      |     |                         |                         |
| 0 | 0 | NA          | BIOF | PHOS  | KEC  | PID  | BIO | REACTOME_SIGNALING_BY_W |                         |
| 0 | 0 | Retinitis p | NA   | SEN   |      | KEC  | PID | REACTOME_CGMP_EFFECTS;f |                         |
| 0 | 0 | NA          | CELI | ACTII |      |      |     |                         |                         |
| 0 | 0 | NA          | SIGN | NUC   | HYDF |      |     |                         |                         |
| 0 | 0 | NA          | CELI | CYT   |      | KEC  | PID |                         |                         |
| 0 | 0 | NA          |      |       |      |      |     |                         |                         |
| 0 | 0 | NA          |      |       |      |      |     |                         |                         |
| 0 | 0 | NA          |      |       |      |      |     |                         |                         |
| 0 | 0 | [Memory, ε  | NA   |       |      |      |     | REACTOME_SIGNALING_BY_H |                         |
| 0 | 0 | NA          | RNA  | CYT   |      | KEC  |     | REACTOME_CYTOSOLIC_TRN/ |                         |
| 0 | 0 | NA          | SYS  | EXTI  |      | KEC  |     | REACTOME_DEVELOPMENTAL  |                         |
| 0 | 0 | Frank-ter   | NA   |       |      |      |     |                         |                         |
| 0 | 0 | NA          |      |       |      |      |     |                         |                         |
| 0 | 0 | NA          |      |       |      |      |     |                         |                         |
| 0 | 0 | NA          |      |       |      |      |     |                         |                         |
| 0 | 0 | {Cancer pr  | NA   | ENZ   | INTR | TRAN | KEC | PID                     | REACTOME_NEGATIVE_REGUI |
| 0 | 0 | {Cancer pr  | NA   | ENZ   | INTR | TRAN | KEC | PID                     | REACTOME_NEGATIVE_REGUI |
| 0 | 0 | {Cancer pr  | NA   | ENZ   | INTR | TRAN | KEC | PID                     | REACTOME_NEGATIVE_REGUI |
| 0 | 0 | NA          |      |       |      |      |     |                         |                         |
| 0 | 0 | NA          |      |       |      |      |     |                         | REACTOME_TRANSLATION;RE |
| 0 | 0 | Night blind | NA   | GLU   | INTR | GLUT | KEC |                         | REACTOME_SIGNALING_BY_G |
| 0 | 0 | NA          |      |       |      |      |     |                         |                         |
| 0 | 0 | NA          | GLY  |       | TRAN | KEC  |     |                         | REACTOME_METABOLISM_OF  |
| 0 | 0 | NA          | ENE  |       |      | KEC  |     |                         | REACTOME_METABOLISM_OF  |
| 0 | 0 | NA          |      | ORG   | HYDF |      |     |                         |                         |
| 0 | 0 | NA          |      | ORG   | HYDF |      |     |                         |                         |
| 0 | 0 | NA          |      |       |      |      |     |                         |                         |
| 0 | 0 | NA          |      |       |      |      |     |                         |                         |
| 0 | 0 | NA          |      |       |      |      |     |                         |                         |
| 0 | 0 | Adult i phe | NA   | BIO   | CELI | TRAN | KEC |                         |                         |
| 0 | 0 | NA          |      | NUC   | DNA  |      |     |                         |                         |
| 0 | 0 | Hermansky   | NA   | ORG   | AXO  | IDEN |     |                         | REACTOME_MEMBRANE_TRAF  |
| 0 | 0 | NA          |      |       |      |      |     |                         |                         |
| 0 | 0 | NA          |      |       |      |      |     |                         |                         |
| 0 | 0 | NA          |      |       |      |      |     |                         |                         |
| 0 | 0 | NA          |      |       |      |      |     |                         |                         |
| 0 | 0 | NA          |      |       |      |      |     |                         |                         |
| 0 | 0 | NA          |      |       |      |      |     |                         | REACTOME_GENERIC_TRANSI |
| 0 | 0 | NA          |      |       |      |      |     |                         |                         |
| 0 | 0 | Diabetes rr | NA   |       |      |      |     |                         |                         |
| 0 | 0 | Hemochroi   | NA   |       |      |      |     |                         |                         |
| 0 | 0 | NA          |      |       |      |      |     |                         |                         |
| 0 | 0 | NA          |      | NUC   |      |      | PID |                         | REACTOME_HOMOLOGOUS_R   |
| 0 | 0 | NA          |      |       |      |      |     |                         |                         |
| 0 | 0 | NA          |      |       |      |      |     |                         |                         |
| 0 | 0 | NA          |      |       |      |      |     |                         |                         |
| 0 | 0 | NA          |      | LIGA  |      | KEC  |     |                         | REACTOME_CYTOSOLIC_TRN/ |
| 0 | 0 | NA          |      | CYT   |      | KEC  | PID | BIO                     |                         |
| 0 | 0 | Deafness,   | NA   |       |      |      | KEC | PID                     | REACTOME_EXTRACELLULAR  |
| 0 | 0 | Deafness,   | NA   |       |      |      | KEC | PID                     | REACTOME_EXTRACELLULAR  |

|   |                 |      |        |        |         |                         |                              |                               |
|---|-----------------|------|--------|--------|---------|-------------------------|------------------------------|-------------------------------|
| 0 | 0 {Diabetes,    | NA . | SIG    | BRU    | CATI    | (KEC . .                | REACTOME_SIGNALLING_BY_I     |                               |
| 0 | 0 .             | NA . | .      | .      | .       | .                       | .                            |                               |
| 0 | 0 .             | NA . | REG .  | LIGAI  | KEC     | PID                     | BIO( REACTOME_GENERIC_TRANSI |                               |
| 0 | 0 .             | NA . | REG .  | LIGAI  | KEC     | PID                     | BIO( REACTOME_GENERIC_TRANSI |                               |
| 0 | 0 .             | NA . | REG .  | LIGAI  | KEC     | PID                     | BIO( REACTOME_GENERIC_TRANSI |                               |
| 0 | 0 .             | NA . | ANA    | .      | .       | KEC . .                 | REACTOME_TRANSLATION;RE      |                               |
| 0 | 0 Spermatog     | NA . | .      | .      | .       | .                       | .                            |                               |
| 0 | 0 .             | NA . | .      | .      | .       | .                       | .                            |                               |
| 0 | 0 .             | NA . | .      | .      | .       | KEC . .                 | .                            |                               |
| 0 | 0 .             | NA . | .      | .      | .       | .                       | .                            |                               |
| 0 | 0 .             | NA . | RNA    | CYT    | (TRAN . | .                       | .                            |                               |
| 0 | 0 .             | NA . | ENZ    | .      | .       | PID .                   | REACTOME_SIGNALING_BY_FC     |                               |
| 0 | 0 Retinitis piç | NA . | REG .  | ENZY   | KEC     | PID .                   | .                            |                               |
| 0 | 0 .             | NA . | RNA    | NUC    | TRAN .  | .                       | .                            |                               |
| 0 | 0 Choriodal c   | NA . | SEN    | INTR . | KEC . . | .                       | .                            |                               |
| 0 | 0 .             | NA . | SIG    | INTR   | TRAN .  | .                       | .                            |                               |
| 0 | 0 .             | NA . | SIG    | INTR   | TRAN .  | .                       | .                            |                               |
| 0 | 0 .             | NA . | .      | .      | .       | PID .                   | .                            |                               |
| 0 | 0 .             | NA . | .      | MEM .  | .       | .                       | .                            |                               |
| 0 | 0 .             | NA . | .      | .      | .       | .                       | REACTOME_MICRORNA_MIRN,      |                               |
| 0 | 0 .             | NA . | .      | .      | .       | .                       | .                            |                               |
| 0 | 0 .             | NA . | .      | .      | .       | .                       | .                            |                               |
| 0 | 0 Neuropath     | NA . | ORG    | PRO    | INTE    | ( .                     | PID .                        |                               |
| 0 | 0 .             | NA . | .      | .      | .       | .                       | .                            |                               |
| 0 | 0 .             | NA . | SYS    | .      | .       | .                       | REACTOME_EXTRACELLULAR       |                               |
| 0 | 0 .             | NA . | .      | .      | .       | KEC . .                 | .                            |                               |
| 0 | 0 Hydatidifor   | NA . | .      | .      | .       | .                       | .                            |                               |
| 0 | 0 .             | NA . | .      | .      | .       | .                       | .                            |                               |
| 0 | 0 .             | NA . | .      | .      | .       | .                       | .                            |                               |
| 0 | 0 Maple syru    | NA   | CMO    | CAR    | ORGLYAS | KEC . .                 | REACTOME_METABOLISM_OF_      |                               |
| 0 | 0 .             | NA . | SEN    | CYT    | (ELEC . | .                       | .                            |                               |
| 0 | 0 Congenital    | NA . | EST    | INTR   | SUBS .  | .                       | REACTOME_TRANSMEMBRANI       |                               |
| 0 | 0 .             | NA . | .      | .      | .       | .                       | .                            |                               |
| 0 | 0 .             | NA . | .      | .      | .       | .                       | .                            |                               |
| 0 | 0 .             | NA . | POS .  | IDEN   | .       | .                       | .                            |                               |
| 0 | 0 .             | NA . | .      | .      | .       | .                       | .                            |                               |
| 0 | 0 .             | NA . | SYS    | .      | LIGAI . | .                       | REACTOME_GENERIC_TRANSI      |                               |
| 0 | 0 .             | NA . | RES    | NUC .  | KEC     | PID .                   | .                            |                               |
| 0 | 0 .             | NA . | .      | .      | .       | .                       | .                            |                               |
| 0 | 0 .             | NA . | .      | CYT    | (PRO    | 1 .                     | .                            |                               |
| 0 | 0 .             | NA . | DNA .  | NUCL . | .       | .                       | REACTOME_DNA_REPAIR          |                               |
| 0 | 0 .             | NA . | .      | .      | .       | .                       | .                            |                               |
| 0 | 0 .             | NA . | .      | .      | .       | .                       | .                            |                               |
| 0 | 0 .             | NA . | .      | .      | .       | KEC . .                 | .                            |                               |
| 0 | 0 Muscular d    | NA . | MUS    | PRO    | STRU    | KEC                     | PID                          | BIO( REACTOME_INTEGRIN_CELL_ç |
| 0 | 0 Muscular d    | NA . | MUS    | PRO    | STRU    | KEC                     | PID                          | BIO( REACTOME_INTEGRIN_CELL_ç |
| 0 | 0 Cardiomyo     | NA . | ANA    | .      | .       | .                       | .                            |                               |
| 0 | 0 .             | NA . | ISOF . | OXID . | .       | .                       | .                            |                               |
| 0 | 0 .             | NA . | .      | .      | .       | KEC . .                 | .                            |                               |
| 0 | 0 .             | NA . | .      | .      | .       | .                       | .                            |                               |
| 0 | 0 .             | NA . | .      | .      | .       | .                       | .                            |                               |
| 0 | 0 .             | NA . | .      | .      | .       | .                       | .                            |                               |
| 0 | 0 .             | NA . | .      | INTRG  | _PF .   | .                       | .                            |                               |
| 0 | 0 Hemophag      | NA . | MEM .  | .      | KEC . . | REACTOME_BOTULINUM_NEUI |                              |                               |
| 0 | 0 .             | NA . | .      | .      | .       | .                       | .                            |                               |



|   |    |             |                     |               |                         |
|---|----|-------------|---------------------|---------------|-------------------------|
| 0 | 0. | NA          | BIOF INTR SULF KEC. | PID.          | REACTOME_CHONDROITIN_SL |
| 0 | 0. | NA          | .                   | .             | .                       |
| 0 | 0. | NA          | INTE ORG HYDF.      | PID.          | .                       |
| 0 | 0. | NA          | .                   | .             | .                       |
| 0 | 0. | NA          | SIG CYT (KINA).     | .             | .                       |
| 0 | 0  | Emery-Dre   | ORG SYN, ACTII.     | .             | REACTOME_MEIOSIS;REACTO |
| 0 | 0  | Emery-Dre   | ORG SYN, ACTII.     | .             | REACTOME_MEIOSIS;REACTO |
| 0 | 0  | Emery-Dre   | ORG SYN, ACTII.     | .             | REACTOME_MEIOSIS;REACTO |
| 0 | 0. | NA          | RES. OXID.          | PID.          | .                       |
| 0 | 0. | NA          | .                   | .             | .                       |
| 0 | 0  | Mental ret  | NUC DNA.            | .             | .                       |
| 0 | 0. | NA          | .                   | .             | .                       |
| 0 | 0  | {Microvasc  | RNA CYT (OXID KEC   | PID, BIO).    | .                       |
| 0 | 0. | NA          | .                   | .             | .                       |
| 0 | 0. | NA          | .                   | .             | .                       |
| 0 | 0  | [LPA defici | SYS. PROI.          | PID.          | REACTOME_METABOLISM_OF_ |
| 0 | 0. | NA          | REG. PHO            | KEC PID BIO). | .                       |
| 0 | 0  | Adenocarc   | BIOF CYT (ACID, KEC | PID, BIO)     | REACTOME_IMMUNE_SYSTEM  |
| 0 | 0. | NA          | .                   | .             | .                       |
| 0 | 0. | NA          | .                   | .             | .                       |
| 0 | 0. | NA          | CYT.                | .             | .                       |
| 0 | 0. | NA          | .                   | .             | .                       |
| 0 | 0  | Raine sync  | .                   | .             | .                       |
| 0 | 0. | NA          | .                   | .             | .                       |
| 0 | 0. | NA          | .                   | .             | .                       |
| 0 | 0. | NA          | RNA NUC.            | .             | .                       |
| 0 | 0. | NA          | RNA NUC.            | .             | .                       |
| 0 | 0. | NA          | RNA NUC.            | .             | .                       |
| 0 | 0. | NA          | .                   | .             | .                       |
| 0 | 0. | NA          | RES. HYDF.          | .             | .                       |
| 0 | 0. | NA          | SULI. SULF KEC.     | .             | REACTOME_CHONDROITIN_SL |
| 0 | 0  | Immunode    | REG MEM/PROI        | KEC PID.      | REACTOME_DOWNSTREAM_S   |
| 0 | 0. | NA          | .                   | .             | .                       |
| 0 | 0. | NA          | .                   | .             | .                       |
| 0 | 0  | Spastic pai | .                   | .             | .                       |
| 0 | 0. | NA          | .                   | .             | .                       |
| 0 | 0. | NA          | EST/MEM/LIPID.      | PID, BIO).    | .                       |
| 0 | 0. | NA          | .                   | PID.          | REACTOME_GASTRIN_CREB_  |
| 0 | 0. | NA          | .                   | .             | .                       |
| 0 | 0. | NA          | .                   | .             | .                       |
| 0 | 0. | NA          | .                   | .             | .                       |
| 0 | 0. | NA          | .                   | .             | .                       |
| 0 | 0. | NA          | .                   | .             | REACTOME_EXTRACELLULAR_ |
| 0 | 0. | NA          | .                   | .             | .                       |
| 0 | 0. | NA          | .                   | .             | .                       |
| 0 | 0. | NA          | .                   | KEC.          | REACTOME_ABC_FAMILY_PRC |
| 0 | 0  | Ciliary dys | .                   | .             | .                       |
| 0 | 0. | NA          | .                   | .             | .                       |
| 0 | 0. | NA          | .                   | .             | .                       |
| 0 | 0. | NA          | .                   | KEC.          | REACTOME_METABOLISM_OF_ |
| 0 | 0. | NA          | PRO CYT (ENZY       | KEC.          | REACTOME_TRIF_MEDIATED_ |



|   |    |              |                |      |      |                          |                         |                        |
|---|----|--------------|----------------|------|------|--------------------------|-------------------------|------------------------|
| 0 | 0. | NA           | PRO INTRPHOS.  |      |      |                          |                         |                        |
| 0 | 0. | NA           | SIGN NUC TRAN. | PID. | BIO. |                          |                         |                        |
| 0 | 0. | NA           | SIGN NUC TRAN. | PID. | BIO. |                          |                         |                        |
| 0 | 0. | NA           | .              | .    | .    | .                        |                         |                        |
| 0 | 0. | NA           | .              | .    | .    | .                        |                         |                        |
| 0 | 0. | NA           | MUL.           | .    | .    | REACTOME_EXTRACELLULAR   |                         |                        |
| 0 | 0. | NA           | NUC STRL.      | .    | .    |                          |                         |                        |
| 0 | 0. | NA           | .              | .    | .    | REACTOME_O_LINKED_GLYCC  |                         |                        |
| 0 | 0. | NA           | .              | .    | .    |                          |                         |                        |
| 0 | 0. | NA           | RNA.           | RNA. | .    | REACTOME_SIGNALING_BY_FI |                         |                        |
| 0 | 0. | NA           | .              | .    | .    |                          |                         |                        |
| 0 | 0. | NA           | .              | KEC. | .    |                          |                         |                        |
| 0 | 0. | NA           | CYT.           | KEC. | BIO  | REACTOME_SIGNALING_BY_W  |                         |                        |
| 0 | 0. | NA           | DNA NUC NUCL   | KEC. | BIO  | REACTOME_ACTIVATION_OF_  |                         |                        |
| 0 | 0. | NA           | .              | .    | .    |                          |                         |                        |
| 0 | 0. | NA           | MUS.           | .    | .    |                          |                         |                        |
| 0 | 0. | NA           | CYT.           | .    | .    |                          |                         |                        |
| 0 | 0  | Hyperlysine  | PRO CYT.       | KEC. | .    | REACTOME_METABOLISM_OF_  |                         |                        |
| 0 | 0. | NA           | .              | .    | .    |                          |                         |                        |
| 0 | 0. | NA           | SIGN INTR.     | KEC. | BIO. |                          |                         |                        |
| 0 | 0. | NA           | .              | .    | .    |                          |                         |                        |
| 0 | 0  | Myopathy,    | .              | KEC. | .    | REACTOME_CELL_CELL_COMI  |                         |                        |
| 0 | 0  | Basal cell c | INTR RECE      | KEC  | PID. | BIO                      | REACTOME_SIGNALING_BY_G |                        |
| 0 | 0. | NA           | .              | .    | .    |                          |                         |                        |
| 0 | 0. | NA           | .              | .    | .    |                          |                         |                        |
| 0 | 0. | NA           | .              | .    | .    |                          |                         |                        |
| 0 | 0. | NA           | CYT            | PHOS | KEC. | REACTOME_GASTRIN_CREB_S  |                         |                        |
| 0 | 0. | NA           | CYT            | PHOS | KEC. | REACTOME_GASTRIN_CREB_S  |                         |                        |
| 0 | 0. | NA           | .              | KEC. | .    |                          |                         |                        |
| 0 | 0  | Renal tubu   | SYS` CELI.     | KEC. | .    | REACTOME_INSULIN_RECEPT  |                         |                        |
| 0 | 0. | NA           | .              | .    | .    |                          |                         |                        |
| 0 | 0. | NA           | .              | .    | .    |                          |                         |                        |
| 0 | 0  | Cataract 3   | .              | KEC. | .    |                          |                         |                        |
| 0 | 0. | NA           | BIOF.          | KEC. | .    | REACTOME_METABOLISM_OF_  |                         |                        |
| 0 | 0. | NA           | .              | .    | .    |                          |                         |                        |
| 0 | 0. | NA           | .              | .    | .    |                          |                         |                        |
| 0 | 0. | NA           | .              | .    | .    |                          |                         |                        |
| 0 | 0. | NA           | .              | .    | .    |                          |                         |                        |
| 0 | 0. | NA           | .              | .    | .    |                          |                         |                        |
| 0 | 0. | NA           | .              | IDEN | KEC. |                          |                         |                        |
| 0 | 0. | NA           | .              | .    | .    |                          |                         |                        |
| 0 | 0  | Cortical dy  | .              | KEC. | .    |                          |                         |                        |
| 0 | 0. | NA           | .              | .    | .    |                          |                         |                        |
| 0 | 0. | NA           | .              | .    | PID. |                          |                         |                        |
| 0 | 0. | NA           | .              | .    | .    |                          |                         |                        |
| 0 | 0  | {Alzheimer   | CYT            | OXID | KEC  | PID.                     | BIO                     | REACTOME_TETRAHYDROBIO |
| 0 | 0. | NA           | ORG.           | .    | .    | .                        |                         |                        |
| 0 | 0. | NA           | SYS` AXO PHOS  | KEC  | PID. | BIO                      | REACTOME_DEVELOPMENTAL  |                        |
| 0 | 0. | NA           | .              | .    | .    |                          |                         |                        |
| 0 | 0  | Cardiomyo    | .              | KEC. | BIO  | REACTOME_ACTIVATED_AMPH  |                         |                        |
| 0 | 0  | Cardiomyo    | .              | KEC. | BIO  | REACTOME_ACTIVATED_AMPH  |                         |                        |
| 0 | 0. | NA           | .              | .    | .    |                          |                         |                        |
| 0 | 0. | NA           | .              | .    | .    |                          |                         |                        |
| 0 | 0  | Ventricular  | .              | .    | .    |                          |                         |                        |

|   |    |             |             |       |       |                         |
|---|----|-------------|-------------|-------|-------|-------------------------|
| 0 | 0. | NA          | PRO.        | ACID  | KEC.  | REACTOME_IMMUNE_SYSTEM  |
| 0 | 0. | NA          | BIOINTRPROT | KEC.  |       |                         |
| 0 | 0. | NA          | BIOINTRPROT | KEC.  |       |                         |
| 0 | 0. | NA          |             |       |       |                         |
| 0 | 0. | NA          |             |       |       |                         |
| 0 | 0  | Ceroid lipo | NA          | SYS   | CYT   |                         |
| 0 | 0. | NA          |             |       |       |                         |
| 0 | 0. | NA          |             |       |       | REACTOME_DEFENSINS;REAC |
| 0 | 0. | NA          |             |       |       |                         |
| 0 | 0. | NA          |             |       |       |                         |
| 0 | 0. | NA          | CAL         | CELI  | IDEN  | KEC.                    |
| 0 | 0  | Occult mac  | NA          |       |       |                         |
| 0 | 0. | NA          |             |       |       |                         |
| 0 | 0. | NA          |             |       |       |                         |
| 0 | 0. | NA          |             |       |       |                         |
| 0 | 0. | NA          |             |       |       |                         |
| 0 | 0. | NA          |             |       |       |                         |
| 0 | 0. | NA          |             |       |       |                         |
| 0 | 0  | Colorectal  | NA          | REG.  | GTPA. | PID.                    |
| 0 | 0  | Mental retæ | NA          | GLY   | ORG   | TRAN                    |
| 0 | 0. | NA          |             |       |       |                         |
| 0 | 0. | NA          |             |       |       |                         |
| 0 | 0  | Alopecia ui | NA          |       |       |                         |
| 0 | 0. | NA          | SIGN.       | RECE  | KEC   | PID                     |
| 0 | 0. | NA          |             |       |       |                         |
| 0 | 0  | Persistent  | NA          | SYS   | TRAN. |                         |
| 0 | 0. | NA          |             |       |       | REACTOME_FACTORS_INVOL  |
| 0 | 0. | NA          |             |       |       |                         |
| 0 | 0. | NA          |             |       |       |                         |
| 0 | 0  | {Hyperchol  | NA          |       | KEC.  |                         |
| 0 | 0. | NA          | EST         | CYT   | KINA  | PID.                    |
| 0 | 0. | NA          |             |       |       | REACTOME_MEIOSIS;REACTO |
| 0 | 0. | NA          |             |       |       |                         |
| 0 | 0. | NA          |             |       |       |                         |
| 0 | 0  | Spastic pai | NA          | ORG.  |       |                         |
| 0 | 0  | Hypogonac   | NA          | SYS   | INTR  | TRAN                    |
| 0 | 0  | Hypogonac   | NA          | SYS   | INTR  | TRAN                    |
| 0 | 0. | NA          |             |       | PID.  |                         |
| 0 | 0. | NA          | GAM         | CELI. |       |                         |
| 0 | 0. | NA          |             |       |       |                         |
| 0 | 0. | NA          | NEG         | NUC   | TRAN. |                         |
| 0 | 0. | NA          | DNA         | ORG   | MICR  | KEC.                    |
| 0 | 0. | NA          |             |       |       | REACTOME_BASE_EXCISION_ |
| 0 | 0. | NA          |             |       |       |                         |
| 0 | 0. | NA          |             |       |       |                         |
| 0 | 0. | NA          |             |       |       |                         |
| 0 | 0. | NA          |             |       |       |                         |
| 0 | 0. | NA          |             |       |       |                         |
| 0 | 0. | NA          | PRO.        |       |       |                         |
| 0 | 0. | NA          |             |       |       |                         |
| 0 | 0. | NA          |             |       |       |                         |

|   |    |              |    |          |              |           |      |   |                          |
|---|----|--------------|----|----------|--------------|-----------|------|---|--------------------------|
| 0 | 0. | NA           | .  | .        | .            | .         | .    | . | .                        |
| 0 | 0. | NA           | .  | MEM/CYT( | RECE.        | PID.      | BIO( | . | .                        |
| 0 | 0  | Cerebellar   | NA | .        | .            | HYDF      | KEC. | . | .                        |
| 0 | 0  | CHARGE ε     | NA | .        | .            | .         | PID. | . | .                        |
| 0 | 0. | NA           | .  | .        | .            | HYDF      | KEC. | . | REACTOME_SIGNALING_BY_G  |
| 0 | 0. | NA           | .  | .        | .            | .         | .    | . | .                        |
| 0 | 0. | NA           | .  | .        | .            | .         | .    | . | .                        |
| 0 | 0. | NA           | .  | SIGN.    | RAS_.        | PID.      | .    | . | .                        |
| 0 | 0. | NA           | .  | .        | .            | .         | .    | . | .                        |
| 0 | 0. | NA           | .  | .        | .            | .         | .    | . | .                        |
| 0 | 0. | NA           | .  | .        | CYT(LIPID    | KEC       | PID. | . | REACTOME_DEVELOPMENTAL   |
| 0 | 0  | Achromato    | NA | .        | SEN:         | .         | PID. | . | .                        |
| 0 | 0  | Achromato    | NA | .        | SEN:         | .         | PID. | . | .                        |
| 0 | 0. | NA           | .  | .        | .            | .         | .    | . | .                        |
| 0 | 0  | ?DECR de     | NA | .        | .            | CYT(OXID. | .    | . | REACTOME_MITOCHONDRIAL_  |
| 0 | 0  | ?DECR de     | NA | .        | .            | CYT(OXID. | .    | . | REACTOME_MITOCHONDRIAL_  |
| 0 | 0. | NA           | .  | GEN.     | TRAN         | KEC.      | .    | . | .                        |
| 0 | 0. | NA           | .  | .        | .            | .         | .    | . | .                        |
| 0 | 0. | NA           | .  | .        | .            | .         | .    | . | .                        |
| 0 | 0. | NA           | .  | .        | .            | .         | .    | . | .                        |
| 0 | 0. | NA           | .  | .        | .            | .         | .    | . | .                        |
| 0 | 0. | NA           | .  | .        | .            | .         | .    | . | .                        |
| 0 | 0. | NA           | .  | .        | .            | .         | .    | . | .                        |
| 0 | 0. | NA           | .  | EST).    | AUXII.       | .         | .    | . | REACTOME_NEURONAL_SYST   |
| 0 | 0. | NA           | .  | .        | .            | .         | .    | . | .                        |
| 0 | 0. | NA           | .  | .        | .            | .         | .    | . | .                        |
| 0 | 0. | NA           | .  | .        | .            | .         | .    | . | .                        |
| 0 | 0. | NA           | .  | .        | .            | .         | .    | . | .                        |
| 0 | 0  | Ciliary dysl | NA | .        | .            | .         | .    | . | .                        |
| 0 | 0  | Thyroid dys  | NA | .        | .            | .         | KEC. | . | .                        |
| 0 | 0  | Birk-Barel l | NA | .        | .            | .         | .    | . | REACTOME_NEURONAL_SYST   |
| 0 | 0  | Mental retε  | NA | .        | .            | .         | .    | . | .                        |
| 0 | 0. | NA           | .  | .        | .            | .         | .    | . | .                        |
| 0 | 0. | NA           | .  | .        | .            | .         | .    | . | .                        |
| 0 | 0. | NA           | .  | SYS      | INTRG_PF     | KEC.      | .    | . | .                        |
| 0 | 0. | NA           | .  | SYS      | .            | .         | .    | . | .                        |
| 0 | 0. | NA           | .  | .        | .            | .         | .    | . | .                        |
| 0 | 0  | Amelogenε    | NA | .        | .            | .         | .    | . | .                        |
| 0 | 0  | Amelogenε    | NA | .        | .            | .         | .    | . | .                        |
| 0 | 0. | NA           | .  | .        | .            | .         | .    | . | .                        |
| 0 | 0. | NA           | .  | .        | .            | .         | .    | . | .                        |
| 0 | 0. | NA           | .  | .        | .            | .         | .    | . | .                        |
| 0 | 0  | Epidermoly   | NA | .        | .            | STRU.     | .    | . | REACTOME_APOPTOTIC_CLEA  |
| 0 | 0. | NA           | .  | .        | .            | TRAN.     | PID. | . | .                        |
| 0 | 0. | NA           | .  | .        | .            | TRAN.     | PID. | . | .                        |
| 0 | 0. | NA           | .  | .        | .            | .         | .    | . | .                        |
| 0 | 0. | NA           | .  | .        | .            | .         | .    | . | .                        |
| 0 | 0. | NA           | .  | .        | .            | .         | .    | . | .                        |
| 0 | 0  | {?Schizopht  | NA | .        | EST/INTRACTI | .         | .    | . | REACTOME_GLUTAMATE_NEU   |
| 0 | 0  | Hydroceph    | NA | .        | .            | .         | KEC. | . | .                        |
| 0 | 0. | NA           | .  | .        | NUC          | TRAN.     | PID. | . | REACTOME_RNA_POL_III_TRA |
| 0 | 0  | Bifid nose   | NA | .        | .            | .         | .    | . | .                        |
| 0 | 0  | Bifid nose   | NA | .        | .            | .         | .    | . | .                        |
| 0 | 0. | NA           | .  | .        | .            | .         | .    | . | .                        |

|   |    |             |    |               |           |      |      |                          |   |
|---|----|-------------|----|---------------|-----------|------|------|--------------------------|---|
| 0 | 0. | NA          | .  | .             | .         | .    | .    | .                        | . |
| 0 | 0. | NA          | .  | .             | .         | .    | .    | .                        | . |
| 0 | 0. | NA          | .  | .             | .         | .    | PID. | REACTOME_TRANSMEMBRANI   | . |
| 0 | 0. | NA          | .  | .             | .         | .    | .    | .                        | . |
| 0 | 0. | NA          | .  | .             | .         | .    | .    | .                        | . |
| 0 | 0. | NA          | .  | ORG.          | KEC.      | .    | .    | REACTOME_TCA_CYCLE_AND   | . |
| 0 | 0. | NA          | .  | .             | .         | .    | .    | .                        | . |
| 0 | 0. | NA          | .  | GAM.          | PHOS.     | .    | .    | REACTOME_CELL_CELL_COMI  | . |
| 0 | 0. | NA          | .  | .             | .         | .    | .    | .                        | . |
| 0 | 0. | NA          | .  | .             | .         | .    | .    | .                        | . |
| 0 | 0. | NA          | .  | .             | .         | .    | .    | .                        | . |
| 0 | 0. | NA          | .  | .             | .         | .    | .    | .                        | . |
| 0 | 0. | NA          | .  | .             | .         | .    | .    | .                        | . |
| 0 | 0. | NA          | .  | .             | .         | .    | .    | .                        | . |
| 0 | 0. | NA          | .  | .             | .         | .    | .    | .                        | . |
| 0 | 0. | NA          | .  | .             | .         | .    | .    | .                        | . |
| 0 | 0. | NA          | .  | .             | .         | .    | .    | .                        | . |
| 0 | 0. | NA          | .  | .             | .         | .    | .    | .                        | . |
| 0 | 0. | NA          | .  | .             | .         | .    | .    | .                        | . |
| 0 | 0. | NA          | .  | .             | .         | .    | .    | .                        | . |
| 0 | 0. | NA          | .  | .             | .         | .    | .    | .                        | . |
| 0 | 0. | NA          | .  | .             | .         | .    | .    | .                        | . |
| 0 | 0. | NA          | .  | .             | .         | .    | .    | .                        | . |
| 0 | 0. | NA          | .  | .             | .         | .    | .    | .                        | . |
| 0 | 0. | NA          | .  | .             | .         | .    | .    | .                        | . |
| 0 | 0. | NA          | .  | INTR.         | .         | .    | .    | .                        | . |
| 0 | 0. | NA          | .  | .             | .         | .    | .    | .                        | . |
| 0 | 0. | NA          | .  | CELI.         | .         | .    | .    | .                        | . |
| 0 | 0. | NA          | .  | .             | .         | .    | .    | .                        | . |
| 0 | 0. | NA          | .  | .             | .         | .    | .    | .                        | . |
| 0 | 0. | NA          | .  | .             | .         | .    | .    | .                        | . |
| 0 | 0. | NA          | .  | .             | .         | .    | .    | .                        | . |
| 0 | 0. | NA          | .  | .             | .         | .    | .    | .                        | . |
| 0 | 0  | Obesity, hy | NA | ENZ' INTRGRO  | KEC       | PID. | .    | REACTOME_SIGNALLING_BY_I | . |
| 0 | 0. |             | NA | .             | .         | .    | .    | .                        | . |
| 0 | 0. |             | NA | .             | .         | .    | .    | .                        | . |
| 0 | 0. |             | NA | SYS'          | .         | KEC  | PID. | REACTOME_SIGNALLING_BY_I | . |
| 0 | 0. |             | NA | .             | CYT(.     | KEC. | .    | REACTOME_CYTOSOLIC_TRN/  | . |
| 0 | 0. |             | NA | .             | .         | .    | .    | .                        | . |
| 0 | 0. |             | NA | BIOF.         | NUCL.     | .    | .    | .                        | . |
| 0 | 0. |             | NA | .             | NUC.      | .    | .    | .                        | . |
| 0 | 0. |             | NA | .             | NUC.      | .    | .    | .                        | . |
| 0 | 0. |             | NA | RNA NUC TRAN. | .         | .    | .    | .                        | . |
| 0 | 0. |             | NA | .             | NUC PROT  | KEC  | PID. | .                        | . |
| 0 | 0. |             | NA | .             | .         | .    | .    | .                        | . |
| 0 | 0. |             | NA | .             | .         | .    | .    | .                        | . |
| 0 | 0. |             | NA | .             | .         | .    | .    | .                        | . |
| 0 | 0. |             | NA | .             | .         | .    | .    | .                        | . |
| 0 | 0. |             | NA | .             | .         | .    | .    | .                        | . |
| 0 | 0. |             | NA | .             | .         | .    | .    | .                        | . |
| 0 | 0  | Porphyrin,  | NA | COF.          | HYDF      | KEC. | BIO  | REACTOME_METABOLISM_OF   | . |
| 0 | 0. |             | NA | .             | .         | .    | .    | REACTOME_EXTRACELLULAR   | . |
| 0 | 0. |             | NA | .             | .         | .    | .    | REACTOME_EXTRACELLULAR   | . |
| 0 | 0. |             | NA | .             | .         | .    | .    | REACTOME_EXTRACELLULAR   | . |
| 0 | 0. |             | NA | .             | .         | .    | .    | .                        | . |
| 0 | 0. |             | NA | .             | EXTIMET/. | .    | .    | REACTOME_DIABETES_PATHV  | . |

|   |   |              |    |                      |                          |
|---|---|--------------|----|----------------------|--------------------------|
| 0 | 0 | Microceph    | NA | ORGKINA              | REACTOME_CELL_CYCLE;REA  |
| 0 | 0 |              | NA |                      |                          |
| 0 | 0 |              | NA |                      |                          |
| 0 | 0 |              | NA | PID                  |                          |
| 0 | 0 |              | NA | PID                  |                          |
| 0 | 0 |              | NA | NUC                  |                          |
| 0 | 0 |              | NA | POS CYT(NUCL         |                          |
| 0 | 0 |              | NA | PID                  | REACTOME_SIGNALLING_BY_I |
| 0 | 0 |              | NA |                      |                          |
| 0 | 0 | Charcot-Mi   | NA |                      | REACTOME_IMMUNE_SYSTEM   |
| 0 | 0 | Epileptic er | NA |                      | REACTOME_Glutamate_NEU   |
| 0 | 0 |              | NA |                      |                          |
| 0 | 0 |              | NA | NUC CYT(ACID_KEC     | REACTOME_METABOLISM_OF_  |
| 0 | 0 | Telangiect   | NA | REG INTR             | PID                      |
| 0 | 0 |              | NA | STRU                 | PID                      |
| 0 | 0 | Epileptic er | NA | ORGACTII KEC PID BIO | REACTOME_APOPTOTIC_CLEA  |
| 0 | 0 | Epileptic er | NA | ORGACTII KEC PID BIO | REACTOME_APOPTOTIC_CLEA  |
| 0 | 0 | Epileptic er | NA | ORGACTII KEC PID BIO | REACTOME_APOPTOTIC_CLEA  |
| 0 | 0 | Epileptic er | NA | ORGACTII KEC PID BIO | REACTOME_APOPTOTIC_CLEA  |
| 0 | 0 |              | NA | REG UBIC ACID        |                          |
| 0 | 0 |              | NA | AMIN CYT             | REACTOME_METABOLISM_OF_  |
| 0 | 0 |              | NA | AMIN CYT             | REACTOME_METABOLISM_OF_  |
| 0 | 0 |              | NA | GLY(ORG HYDF_KEC     | REACTOME_METABOLISM_OF_  |
| 0 | 0 | ?Carnitine   | NA | GEN                  | KEC                      |
| 0 | 0 | ?Carnitine   | NA | GEN                  | KEC                      |
| 0 | 0 |              | NA | ENZ                  | KEC PID BIO              |
| 0 | 0 |              | NA | SYS INTR             |                          |
| 0 | 0 | Amyotroph    | NA | DNA NUC DNA          |                          |
| 0 | 0 |              | NA |                      |                          |
| 0 | 0 |              | NA | NUC                  | REACTOME_RNA_POL_III_TRA |
| 0 | 0 |              | NA | GTPA_KEC PID BIO     | REACTOME_SIGNALLING_BY_I |
| 0 | 0 |              | NA | GLY                  | KEC                      |
| 0 | 0 |              | NA | CYT                  |                          |
| 0 | 0 |              | NA |                      |                          |
| 0 | 0 |              | NA |                      |                          |
| 0 | 0 | Dopamine     | NA | CELI CYT             | KEC BIO                  |
| 0 | 0 | Ehlers-Dar   | NA | PRO                  | KEC PID                  |
| 0 | 0 | Ehlers-Dar   | NA | PRO                  | KEC PID                  |
| 0 | 0 | Ehlers-Dar   | NA | PRO                  | KEC PID                  |
| 0 | 0 |              | NA |                      |                          |
| 0 | 0 |              | NA |                      |                          |
| 0 | 0 | Aortic valv  | NA | MUS NUC              | KEC PID BIO              |
| 0 | 0 | Aortic valv  | NA | MUS NUC              | KEC PID BIO              |
| 0 | 0 | Aortic valv  | NA | MUS NUC              | KEC PID BIO              |
| 0 | 0 |              | NA |                      |                          |
| 0 | 0 |              | NA |                      |                          |
| 0 | 0 |              | NA | POS                  | KEC PID BIO              |
| 0 | 0 | Mental ret   | NA | OLIG INTR CATI       | KEC                      |
| 0 | 0 | Hypophosph   | NA | REG MEM CATI         |                          |
| 0 | 0 |              | NA |                      |                          |
| 0 | 0 |              | NA |                      |                          |
| 0 | 0 |              | NA |                      |                          |
| 0 | 0 | Kleefstra s  | NA | ONE                  | HIST(KEC                 |
| 0 | 0 |              | NA |                      |                          |

|   |    |             |                       |               |                         |
|---|----|-------------|-----------------------|---------------|-------------------------|
| 0 | 0. | NA          | REG CYT(HYDF.         |               |                         |
| 0 | 0. | NA          | HYDF.                 |               |                         |
| 0 | 0. | NA          | PRO ORGMET/.          |               |                         |
| 0 | 0. | NA          |                       |               |                         |
| 0 | 0. | NA          |                       |               |                         |
| 0 | 0. | NA          |                       |               |                         |
| 0 | 0. | NA          |                       |               |                         |
| 0 | 0. | NA          | MAIN NUC.             |               |                         |
| 0 | 0. | NA          | MAIN NUC.             |               |                         |
| 0 | 0. | NA          |                       |               |                         |
| 0 | 0. | NA          |                       |               |                         |
| 0 | 0  | Megaloblast | EST/MEM/PRO1.         |               | REACTOME_METABOLISM_OF_ |
| 0 | 0  | Megaloblast | EST/MEM/PRO1.         |               | REACTOME_METABOLISM_OF_ |
| 0 | 0. | NA          |                       |               |                         |
| 0 | 0. | NA          | NEG CYT(ENZY.         |               |                         |
| 0 | 0. | NA          | SYS CYT(.             |               |                         |
| 0 | 0. | NA          |                       |               |                         |
| 0 | 0. | NA          |                       |               |                         |
| 0 | 0  | Deafness,   | PRO ORGHYDF.          |               |                         |
| 0 | 0. | NA          |                       |               | REACTOME_INTEGRIN_CELL_ |
| 0 | 0  | Thrombocy   |                       |               |                         |
| 0 | 0  | Thrombocy   |                       |               |                         |
| 0 | 0. | NA          |                       |               |                         |
| 0 | 0. | NA          | MUS CYT(ACTII.        | PID.          |                         |
| 0 | 0. | NA          |                       |               |                         |
| 0 | 0. | NA          | NUC.                  |               |                         |
| 0 | 0. | NA          |                       |               |                         |
| 0 | 0. | NA          |                       |               |                         |
| 0 | 0. | NA          |                       |               |                         |
| 0 | 0. | NA          |                       |               |                         |
| 0 | 0. | NA          |                       |               |                         |
| 0 | 0. | NA          |                       |               |                         |
| 0 | 0  | Myasthenic  | CYT(.                 | KEC.          | REACTOME_PHOSPHOLIPID_M |
| 0 | 0. | NA          |                       |               |                         |
| 0 | 0  | Deafness,   | REG NON.              |               |                         |
| 0 | 0. | NA          |                       |               |                         |
| 0 | 0. | NA          |                       |               |                         |
| 0 | 0  | Thyroid pa  | STRU KEC.             |               |                         |
| 0 | 0. | NA          |                       |               |                         |
| 0 | 0. | NA          | DNA ORGDNA_.          |               |                         |
| 0 | 0. | NA          | SYS PRO CARE.         | PID.          | REACTOME_EXTRACELLULAR_ |
| 0 | 0. | NA          | CELI ORG NUCL.        | PID.          |                         |
| 0 | 0  | Hemophag    | MUL.                  | KEC PID BIO(. |                         |
| 0 | 0  | Deafness,   | REG NON.              |               |                         |
| 0 | 0. | NA          | CYT(OXID KEC.         |               |                         |
| 0 | 0. | NA          |                       |               |                         |
| 0 | 0. | NA          | PRO CATI(KEC PID BIO( |               | REACTOME_SIGNALING_BY_G |
| 0 | 0. | NA          |                       |               |                         |
| 0 | 0. | NA          |                       |               |                         |
| 0 | 0. | NA          |                       |               |                         |
| 0 | 0. | NA          |                       |               |                         |
| 0 | 0. | NA          | REG MEM CARE.         | PID.          |                         |



|   |   |                |    |              |            |       |      |                          |                          |
|---|---|----------------|----|--------------|------------|-------|------|--------------------------|--------------------------|
| 0 | 0 | NA             | .  | .            | .          | .     | .    | .                        | .                        |
| 0 | 0 | Cone-rod c     | NA | .            | .          | .     | .    | .                        | .                        |
| 0 | 0 | NA             | .  | ORG.         | .          | .     | .    | .                        | .                        |
| 0 | 0 | NA             | .  | .            | .          | KEC.  | .    | .                        | .                        |
| 0 | 0 | NA             | .  | .            | .          | .     | .    | .                        | .                        |
| 0 | 0 | NA             | .  | .            | .          | .     | .    | .                        | .                        |
| 0 | 0 | NA             | .  | SYS` MEM.    | .          | PID.  | .    | .                        | .                        |
| 0 | 0 | NA             | .  | .            | .          | .     | .    | .                        | .                        |
| 0 | 0 | Rhabdomy       | NA | .            | .          | KEC.  | .    | REACTOME_BIOLOGICAL_OXID | .                        |
| 0 | 0 | NA             | .  | .            | .          | .     | .    | .                        | .                        |
| 0 | 0 | Agammagl       | NA | .            | SYS`       | MOLIE | KEC  | PID                      | BIO(                     |
| 0 | 0 | NA             | .  | .            | .          | .     | .    | .                        | REACTOME_ANTIGEN_ACTIVAT |
| 0 | 0 | Spastic pai    | NA | .            | .          | .     | .    | .                        | .                        |
| 0 | 0 | NA             | .  | .            | .          | .     | .    | .                        | .                        |
| 0 | 0 | Urofacial s    | NA | .            | .          | HYDF  | KEC. | .                        | REACTOME_HS_GAG_DEGRAI   |
| 0 | 0 | NA             | .  | .            | .          | .     | .    | .                        | .                        |
| 0 | 0 | NA             | .  | .            | .          | .     | .    | .                        | .                        |
| 0 | 0 | NA             | .  | .            | .          | .     | .    | .                        | .                        |
| 0 | 0 | NA             | .  | .            | .          | KEC.  | .    | .                        | .                        |
| 0 | 0 | NA             | .  | .            | .          | .     | .    | .                        | .                        |
| 0 | 0 | Epidermoly     | NA | .            | SYS` INTR. | .     | PID. | .                        | REACTOME_CELL_CELL_COMI  |
| 0 | 0 | NA             | .  | .            | .          | .     | .    | .                        | .                        |
| 0 | 0 | NA             | .  | .            | .          | .     | .    | .                        | REACTOME_SIGNALLING_BY_I |
| 0 | 0 | NA             | .  | .            | RECE.      | PID.  | .    | .                        | REACTOME_DEVELOPMENTAL   |
| 0 | 0 | NA             | .  | .            | .          | .     | .    | .                        | .                        |
| 0 | 0 | NA             | .  | RNA          | CYT(       | RNA_  | .    | .                        | .                        |
| 0 | 0 | NA             | .  | .            | .          | .     | .    | .                        | .                        |
| 0 | 0 | NA             | .  | .            | .          | .     | .    | .                        | .                        |
| 0 | 0 | NA             | .  | CELICYT(GTPA | KEC        | PID   | BIO( | .                        | REACTOME_DEVELOPMENTAL   |
| 0 | 0 | NA             | .  | CELICYT(GTPA | KEC        | PID   | BIO( | .                        | REACTOME_DEVELOPMENTAL   |
| 0 | 0 | NA             | .  | .            | .          | .     | .    | .                        | .                        |
| 0 | 0 | NA             | .  | .            | .          | KEC.  | BIO( | .                        | .                        |
| 0 | 0 | NA             | .  | .            | .          | .     | .    | .                        | .                        |
| 0 | 0 | NA             | .  | .            | .          | .     | .    | .                        | .                        |
| 0 | 0 | NA             | .  | .            | .          | .     | .    | .                        | .                        |
| 0 | 0 | NA             | .  | .            | .          | KEC   | PID. | .                        | REACTOME_METABOLISM_OF_  |
| 0 | 0 | NA             | .  | .            | .          | KEC   | PID. | .                        | REACTOME_METABOLISM_OF_  |
| 0 | 0 | NA             | .  | .            | .          | KEC   | PID. | .                        | REACTOME_METABOLISM_OF_  |
| 0 | 0 | NA             | .  | .            | .          | .     | .    | .                        | .                        |
| 0 | 0 | NA             | .  | .            | .          | .     | .    | .                        | .                        |
| 0 | 0 | NA             | .  | .            | .          | .     | .    | .                        | .                        |
| 0 | 0 | NA             | .  | PRO.         | KEC.       | .     | .    | .                        | REACTOME_SIGNALING_BY_W  |
| 0 | 0 | NA             | .  | SYS` EXT     | TIENZY.    | .     | .    | .                        | .                        |
| 0 | 0 | NA             | .  | .            | .          | .     | .    | .                        | .                        |
| 0 | 0 | NA             | .  | .            | .          | .     | .    | .                        | .                        |
| 0 | 0 | NA             | .  | .            | .          | .     | .    | .                        | .                        |
| 0 | 0 | NA             | .  | .            | .          | .     | .    | .                        | .                        |
| 0 | 0 | 0 Epileptic er | NA | .            | EST/ORG    | ACTI' | .    | .                        | .                        |
| 0 | 0 | NA             | .  | .            | .          | KEC.  | .    | .                        | REACTOME_SIGNALLING_BY_I |
| 0 | 0 | NA             | .  | .            | .          | .     | .    | .                        | .                        |
| 0 | 0 | {Pulmonar}     | NA | .            | .          | .     | .    | .                        | REACTOME_O_LINKED_GLYCC  |
| 0 | 0 | {Pulmonar}     | NA | .            | .          | .     | .    | .                        | REACTOME_O_LINKED_GLYCC  |
| 0 | 0 | {Pulmonar}     | NA | .            | .          | .     | .    | .                        | REACTOME_O_LINKED_GLYCC  |
| 0 | 0 | {Pulmonar}     | NA | .            | .          | .     | .    | .                        | REACTOME_O_LINKED_GLYCC  |

|   |               |    |   |      |      |      |     |                         |     |                          |
|---|---------------|----|---|------|------|------|-----|-------------------------|-----|--------------------------|
| 0 | 0 {Pulmonary  | NA | . | .    | .    | .    | .   | REACTOME_O_LINKED_GLYCC |     |                          |
| 0 | 0 Segawa sy   | NA | . | ANA  | .    | OXID | KEC | PID                     | BIO | REACTOME_METABOLISM_OF   |
| 0 | 0             | NA | . | .    | .    | .    | .   | .                       | .   | .                        |
| 0 | 0 Immunode    | NA | . | PHO  | INTR | .    | KEC | PID                     | .   | REACTOME_IMMUNOREGULAT   |
| 0 | 0             | NA | . | .    | INTR | SUB  | KEC | .                       | .   | .                        |
| 0 | 0             | NA | . | .    | INTR | SUB  | KEC | .                       | .   | .                        |
| 0 | 0             | NA | . | .    | .    | .    | .   | .                       | .   | .                        |
| 0 | 0             | NA | . | .    | .    | .    | KEC | .                       | .   | REACTOME_SIGNALING_BY_G  |
| 0 | 0             | NA | . | .    | .    | .    | .   | .                       | .   | .                        |
| 0 | 0             | NA | . | .    | .    | .    | .   | .                       | .   | .                        |
| 0 | 0             | NA | . | .    | .    | .    | .   | .                       | .   | .                        |
| 0 | 0             | NA | . | REG  | NUC  | TRAN | KEC | PID                     | .   | .                        |
| 0 | 0             | NA | . | .    | .    | .    | .   | .                       | .   | .                        |
| 0 | 0             | NA | . | .    | .    | .    | .   | .                       | .   | .                        |
| 0 | 0             | NA | . | .    | .    | .    | .   | .                       | .   | .                        |
| 0 | 0             | NA | . | RNA  | NUC  | .    | KEC | PID                     | .   | REACTOME_BMAL1_CLOCK_NI  |
| 0 | 0             | NA | . | .    | .    | .    | .   | .                       | .   | .                        |
| 0 | 0 Ovarian ca  | NA | . | .    | .    | HYDF | KEC | .                       | .   | .                        |
| 0 | 0             | NA | . | .    | .    | HYDF | KEC | .                       | BIO | REACTOME_INSULIN_RECEPT  |
| 0 | 0 Rickets du  | NA | . | .    | .    | .    | .   | .                       | .   | REACTOME_METABOLISM_OF   |
| 0 | 0             | NA | . | .    | .    | .    | .   | PID                     | .   | .                        |
| 0 | 0             | NA | . | .    | .    | .    | .   | PID                     | .   | .                        |
| 0 | 0 Deafness,   | NA | . | .    | .    | .    | .   | .                       | .   | .                        |
| 0 | 0             | NA | . | .    | .    | .    | KEC | .                       | BIO | REACTOME_METABOLISM_OF   |
| 0 | 0             | NA | . | .    | .    | .    | .   | .                       | .   | .                        |
| 0 | 0             | NA | . | REG  | .    | G_PF | .   | PID                     | .   | REACTOME_TRIF_MEDIATED_  |
| 0 | 0 Glycogen s  | NA | . | .    | CYT  | OXID | KEC | PID                     | BIO | REACTOME_PYRUVATE_META   |
| 0 | 0 Hyperekple  | NA | . | CELI | .    | CATI | .   | .                       | .   | REACTOME_TRANSMEMBRANI   |
| 0 | 0             | NA | . | SYS  | .    | .    | .   | .                       | .   | .                        |
| 0 | 0             | NA | . | CELI | ORG  | .    | .   | PID                     | BIO | REACTOME_APOPTOTIC_CLEA  |
| 0 | 0             | NA | . | .    | .    | .    | .   | .                       | .   | .                        |
| 0 | 0 Hemolytic ; | NA | . | REG  | CELI | .    | KEC | .                       | .   | .                        |
| 0 | 0             | NA | . | .    | .    | .    | .   | .                       | .   | .                        |
| 0 | 0             | NA | . | .    | .    | .    | KEC | .                       | .   | REACTOME_TRIGLYCERIDE_B  |
| 0 | 0             | NA | . | .    | IDEN | .    | .   | .                       | .   | .                        |
| 0 | 0             | NA | . | EST  | ORG  | .    | .   | PID                     | .   | REACTOME_CELL_CYCLE;REA  |
| 0 | 0             | NA | . | .    | .    | .    | KEC | .                       | .   | .                        |
| 0 | 0             | NA | . | .    | .    | .    | KEC | .                       | .   | REACTOME_SIGNALING_BY_G  |
| 0 | 0             | NA | . | .    | .    | .    | .   | .                       | .   | .                        |
| 0 | 0             | NA | . | .    | .    | .    | .   | .                       | .   | .                        |
| 0 | 0             | NA | . | .    | .    | .    | KEC | .                       | .   | REACTOME_SIGNALING_BY_G  |
| 0 | 0             | NA | . | .    | .    | .    | KEC | .                       | .   | REACTOME_SIGNALING_BY_G  |
| 0 | 0             | NA | . | .    | .    | .    | KEC | .                       | .   | REACTOME_MRNA_DECAY_BY   |
| 0 | 0             | NA | . | .    | .    | .    | .   | .                       | .   | .                        |
| 0 | 0             | NA | . | .    | .    | .    | .   | .                       | .   | .                        |
| 0 | 0             | NA | . | PHO  | .    | OXID | KEC | .                       | .   | REACTOME_PPARA_ACTIVATE  |
| 0 | 0             | NA | . | .    | .    | .    | .   | .                       | .   | .                        |
| 0 | 0             | NA | . | ORG  | .    | .    | .   | PID                     | .   | .                        |
| 0 | 0             | NA | . | RNA  | NUC  | .    | .   | .                       | .   | .                        |
| 0 | 0             | NA | . | .    | .    | .    | .   | .                       | .   | REACTOME_PROCESSING_OF   |
| 0 | 0             | NA | . | .    | .    | .    | .   | .                       | .   | .                        |
| 0 | 0             | NA | . | .    | .    | .    | .   | .                       | .   | .                        |
| 0 | 0             | NA | . | CELI | .    | .    | KEC | PID                     | BIO | REACTOME_SIGNALLING_BY_I |
| 0 | 0 McArdle di  | NA | . | GLU  | .    | TRAN | KEC | .                       | BIO | REACTOME_GLYCOGEN_BREA   |

|   |   |                   |                            |                          |
|---|---|-------------------|----------------------------|--------------------------|
| 0 | 0 | NA                | BIOFCYT(ACID)KEC.          | REACTOME_DIABETES_PATHW  |
| 0 | 0 | NA                | NUC KINA(KEC.              |                          |
| 0 | 0 | NA                | KEC.                       | REACTOME_ACTIVATION_OF_  |
| 0 | 0 | NA                | EST/ CATI(.                | REACTOME_NEURONAL_SYST   |
| 0 | 0 | NA                | PRO ORGPHOS(KEC PID) BIO(. |                          |
| 0 | 0 | NA                |                            |                          |
| 0 | 0 | Metastasis NA     | CELI. GTP(KEC PID).        | REACTOME_RAP1_SIGNALLIN  |
| 0 | 0 | Metastasis NA     | CELI. GTP(KEC PID).        | REACTOME_RAP1_SIGNALLIN  |
| 0 | 0 | Aicardi-Go NA     | KEC.                       |                          |
| 0 | 0 | NA                |                            |                          |
| 0 | 0 | NA                | ORG.                       | REACTOME_MHC_CLASS_II_AI |
| 0 | 0 | NA                | PRO.                       |                          |
| 0 | 0 | NA                |                            |                          |
| 0 | 0 | NA                | BIOF. PHOS(KEC PID) BIO(   | REACTOME_DOWNREGULATIC   |
| 0 | 0 | Mitochondr NA     | ORG. KEC.                  | REACTOME_TCA_CYCLE_AND   |
| 0 | 0 | Osteopetr NA      | POS INTR. KEC.             | REACTOME_INSULIN_RECEPT( |
| 0 | 0 | [Skin/hair/ε NA   |                            |                          |
| 0 | 0 | [Skin/hair/ε NA   |                            |                          |
| 0 | 0 | NA                | SIG( CYT(.                 |                          |
| 0 | 0 | Smith-Lem NA      | BIO(ORG OXID)KEC.          | REACTOME_METABOLISM_OF_  |
| 0 | 0 | Deafness, NA      |                            |                          |
| 0 | 0 | NA                | EST/ CELI VITAI.           |                          |
| 0 | 0 | NA                |                            |                          |
| 0 | 0 | NA                |                            |                          |
| 0 | 0 | NA                | REG CYT(RAS_KEC PID).      | REACTOME_SIGNALING_BY_RI |
| 0 | 0 | NA                |                            |                          |
| 0 | 0 | NA                | BIOF. PRO(.                |                          |
| 0 | 0 | NA                | LIPII INTR. KEC.           | REACTOME_GLYCOSPHINGOL   |
| 0 | 0 | NA                |                            | REACTOME_TRANSMEMBRANI   |
| 0 | 0 | NA                |                            |                          |
| 0 | 0 | NA                | DNA CYT(.                  |                          |
| 0 | 0 | NA                |                            |                          |
| 0 | 0 | NA                |                            |                          |
| 0 | 0 | NA                | MEM PHOS.                  |                          |
| 0 | 0 | NA                | G_PI INTR GLUT KEC.        |                          |
| 0 | 0 | NA                |                            |                          |
| 0 | 0 | NA                |                            |                          |
| 0 | 0 | Asphyxiatir NA    | ORG CYT( KEC.              | REACTOME_MHC_CLASS_II_AI |
| 0 | 0 | NA                | PHOS(KEC.                  | REACTOME_NITRIC_OXIDE_ST |
| 0 | 0 | NA                |                            |                          |
| 0 | 0 | NA                | CELI. CATI(KEC.            | REACTOME_SIGNALING_BY_EI |
| 0 | 0 | Alpha-metf NA     | CYT(TRAN KEC.              | REACTOME_METABOLISM_OF_  |
| 0 | 0 | Ataxia-tela NA    | DNA. PHOS(KEC PID) BIO(    | REACTOME_MEIOSIS;REACTO  |
| 0 | 0 | NA                |                            |                          |
| 0 | 0 | NA                |                            |                          |
| 0 | 0 | NA                | ENZ' CYT(NUCL. PID).       |                          |
| 0 | 0 | NA                | MITCORG SEQL.              | REACTOME_CELL_CYCLE;REA  |
| 0 | 0 | NA                | POS CELI PRO(KEC.          | REACTOME_CELL_CELL_COMI  |
| 0 | 0 | NA                | BIOF. NUCL. PID.           |                          |
| 0 | 0 | NA                |                            |                          |
| 0 | 0 | Atrial fibrill NA | EST/ INTR CATI(.           | REACTOME_DEVELOPMENTAL   |
| 0 | 0 | NA                |                            |                          |
| 0 | 0 | NA                | EST/ ORG.                  | REACTOME_COPI_MEDIATED_  |
| 0 | 0 | NA                | RIBC RNA_KEC.              | REACTOME_MRNA_DECAY_BY   |

|   |   |              |    |     |      |      |      |      |                         |                         |                          |                          |                         |
|---|---|--------------|----|-----|------|------|------|------|-------------------------|-------------------------|--------------------------|--------------------------|-------------------------|
| 0 | 0 | Leukemia, NA | .  | .   | .    | KEC  | PID  | BIO  | (                       | REACTOME_SIGNALING_BY_R |                          |                          |                         |
| 0 | 0 | Leukemia, NA | .  | .   | .    | KEC  | PID  | BIO  | (                       | REACTOME_SIGNALING_BY_R |                          |                          |                         |
| 0 | 0 | Deafness, NA | .  | SEN | :    | .    | .    | .    | .                       | .                       |                          |                          |                         |
| 0 | 0 | .            | NA | .   | .    | KEC  | .    | .    | REACTOME_SIGNALING_BY_G |                         |                          |                          |                         |
| 0 | 0 | .            | NA | .   | .    | KEC  | .    | .    | .                       |                         |                          |                          |                         |
| 0 | 0 | .            | NA | .   | SYS  | INTR | RECE | .    | .                       |                         |                          |                          |                         |
| 0 | 0 | .            | NA | .   | .    | .    | .    | .    | .                       |                         |                          |                          |                         |
| 0 | 0 | Leigh synd   | NA | .   | CYT  | (    | .    | .    | .                       |                         |                          |                          |                         |
| 0 | 0 | .            | NA | .   | CELI | CYT  | (    | KEC  | PID                     | .                       |                          |                          |                         |
| 0 | 0 | .            | NA | .   | .    | .    | .    | .    | .                       |                         |                          |                          |                         |
| 0 | 0 | .            | NA | .   | .    | .    | .    | .    | .                       |                         |                          |                          |                         |
| 0 | 0 | {Ovarian c   | NA | .   | CELI | INTR | PEPT | .    | .                       |                         |                          |                          |                         |
| 0 | 0 | .            | NA | .   | .    | .    | .    | .    | .                       |                         |                          |                          |                         |
| 0 | 0 | .            | NA | .   | .    | .    | .    | .    | .                       |                         |                          |                          |                         |
| 0 | 0 | .            | NA | .   | .    | .    | .    | .    | .                       |                         |                          |                          |                         |
| 0 | 0 | .            | NA | .   | .    | .    | .    | .    | .                       |                         |                          |                          |                         |
| 0 | 0 | .            | NA | .   | .    | .    | .    | .    | .                       |                         |                          |                          |                         |
| 0 | 0 | Neuropath    | NA | .   | EST  | /    | CYT  | (    | NUCL                    | .                       |                          |                          |                         |
| 0 | 0 | Brugada s    | NA | .   | REG  | ORGC | ATI  | (    | KEC                     | .                       |                          |                          |                         |
| 0 | 0 | Brugada s    | NA | .   | REG  | ORGC | ATI  | (    | KEC                     | .                       |                          |                          |                         |
| 0 | 0 | Brugada s    | NA | .   | REG  | ORGC | ATI  | (    | KEC                     | .                       |                          |                          |                         |
| 0 | 0 | .            | NA | .   | .    | .    | .    | .    | .                       |                         |                          |                          |                         |
| 0 | 0 | .            | NA | .   | POS  | MAC  | .    | KEC  | PID                     | BIO                     | (                        | REACTOME_CELL_CYCLE;REA  |                         |
| 0 | 0 | .            | NA | .   | .    | SING | .    | .    | .                       | .                       |                          |                          |                         |
| 0 | 0 | .            | NA | .   | EST  | /    | INTR | CATI | (                       | .                       | REACTOME_NEURONAL_SYST   |                          |                         |
| 0 | 0 | Periodic fe  | NA | .   | RNA  | INTR | RECE | KEC  | PID                     | BIO                     | (                        | REACTOME_EXTRINSIC_PATH' |                         |
| 0 | 0 | .            | NA | .   | SYS  | .    | .    | .    | .                       | .                       |                          |                          |                         |
| 0 | 0 | OKT4 epitc   | NA | .   | SYS  | MEM  | KINA | :    | KEC                     | PID                     | BIO                      | (                        | REACTOME_NEF_MEDIATES_L |
| 0 | 0 | .            | NA | .   | .    | .    | .    | .    | .                       | .                       |                          |                          |                         |
| 0 | 0 | .            | NA | .   | INTR | .    | .    | .    | .                       | .                       |                          |                          |                         |
| 0 | 0 | .            | NA | .   | .    | .    | .    | .    | .                       | .                       |                          |                          |                         |
| 0 | 0 | .            | NA | .   | .    | STRL | .    | PID  | .                       | .                       |                          |                          |                         |
| 0 | 0 | .            | NA | .   | .    | .    | .    | .    | .                       | .                       |                          |                          |                         |
| 0 | 0 | .            | NA | .   | .    | .    | .    | .    | .                       | .                       |                          |                          |                         |
| 0 | 0 | .            | NA | .   | .    | .    | .    | .    | .                       | .                       |                          |                          |                         |
| 0 | 0 | .            | NA | .   | .    | .    | .    | .    | .                       | .                       |                          |                          |                         |
| 0 | 0 | Leukemia, NA | .  | .   | TRAN | KEC  | .    | .    | .                       | .                       |                          |                          |                         |
| 0 | 0 | .            | NA | .   | .    | .    | .    | .    | .                       | .                       |                          |                          |                         |
| 0 | 0 | .            | NA | .   | .    | .    | .    | .    | .                       | .                       |                          |                          |                         |
| 0 | 0 | .            | NA | .   | .    | .    | .    | .    | .                       | .                       |                          |                          |                         |
| 0 | 0 | .            | NA | .   | .    | .    | KEC  | .    | BIO                     | (                       | REACTOME_SYNTHESIS_OF_F  |                          |                         |
| 0 | 0 | .            | NA | .   | .    | .    | KEC  | .    | BIO                     | (                       | REACTOME_SYNTHESIS_OF_F  |                          |                         |
| 0 | 0 | .            | NA | .   | .    | .    | .    | .    | .                       | .                       |                          |                          |                         |
| 0 | 0 | Hyperbiliru  | NA | .   | EST  | /    | INTR | ACTI | (                       | .                       | REACTOME_BILE_ACID_AND_E |                          |                         |
| 0 | 0 | .            | NA | .   | .    | .    | .    | .    | .                       | .                       |                          |                          |                         |
| 0 | 0 | .            | NA | .   | EST  | /    | CYT  | (    | .                       | .                       |                          |                          |                         |
| 0 | 0 | .            | NA | .   | .    | .    | .    | .    | .                       | .                       |                          |                          |                         |
| 0 | 0 | .            | NA | .   | .    | .    | .    | .    | .                       | .                       |                          |                          |                         |
| 0 | 0 | .            | NA | .   | .    | .    | .    | .    | .                       | .                       |                          |                          |                         |
| 0 | 0 | .            | NA | .   | .    | .    | .    | .    | .                       | REACTOME_O_LINKED_GLYCC |                          |                          |                         |
| 0 | 0 | .            | NA | .   | .    | .    | .    | .    | .                       | REACTOME_O_LINKED_GLYCC |                          |                          |                         |
| 0 | 0 | .            | NA | .   | .    | .    | .    | .    | .                       | .                       |                          |                          |                         |
| 0 | 0 | .            | NA | .   | .    | .    | .    | .    | .                       | .                       |                          |                          |                         |

|   |    |            |    |     |          |       |                          |
|---|----|------------|----|-----|----------|-------|--------------------------|
| 0 | 0. | NA         | .  | .   | KEC      | PID.  | REACTOME_SIGNALLING_BY_I |
| 0 | 0. | NA         | .  | CYT | .        | .     | .                        |
| 0 | 0. | NA         | .  | .   | KEC      | .     | .                        |
| 0 | 0. | NA         | .  | .   | KEC      | .     | .                        |
| 0 | 0. | NA         | .  | .   | .        | .     | .                        |
| 0 | 0. | NA         | .  | .   | .        | .     | .                        |
| 0 | 0. | NA         | .  | .   | .        | .     | .                        |
| 0 | 0. | NA         | .  | RNA | TRAN     | PID.  | .                        |
| 0 | 0. | NA         | .  | .   | .        | .     | .                        |
| 0 | 0. | NA         | .  | .   | .        | .     | .                        |
| 0 | 0. | NA         | .  | .   | .        | .     | .                        |
| 0 | 0  | Ichthyosis | NA | .   | SYS      | ORG   | STRL.                    |
| 0 | 0  | White spor | NA | .   | ANA      | .     | .                        |
| 0 | 0. | NA         | .  | .   | .        | .     | .                        |
| 0 | 0. | NA         | .  | .   | INTRIDEN | KEC   | PID.                     |
| 0 | 0. | NA         | .  | .   | PRO      | CYT   | (KINA;KEC                |
| 0 | 0. | NA         | .  | .   | .        | .     | .                        |
| 0 | 0. | NA         | .  | .   | .        | .     | .                        |
| 0 | 0  | Deafness,  | NA | .   | SEN      | ORG   | .                        |
| 0 | 0. | NA         | .  | .   | .        | .     | .                        |
| 0 | 0. | NA         | .  | .   | LIPI     | INTRC | ATI(KEC                  |
| 0 | 0. | NA         | .  | .   | LIPI     | INTRC | ATI(KEC                  |
| 0 | 0. | NA         | .  | .   | LIPI     | INTRC | ATI(KEC                  |
| 0 | 0. | NA         | .  | .   | LIPI     | INTRC | ATI(KEC                  |
| 0 | 0. | NA         | .  | .   | CYT      | KEC   | .                        |
| 0 | 0  | Spermatog  | NA | .   | .        | .     | .                        |
| 0 | 0. | NA         | .  | .   | RNA      | .     | .                        |
| 0 | 0. | NA         | .  | .   | RNA      | .     | .                        |
| 0 | 0. | NA         | .  | .   | NUC      | TRAN  | PID.                     |
| 0 | 0. | NA         | .  | .   | .        | .     | REACTOME_ASSOCIATION_OF  |
| 0 | 0. | NA         | .  | .   | .        | .     | .                        |
| 0 | 0. | NA         | .  | .   | .        | .     | .                        |
| 0 | 0. | NA         | .  | .   | .        | PID   | .                        |
| 0 | 0. | NA         | .  | .   | .        | .     | .                        |
| 0 | 0. | NA         | .  | .   | .        | .     | .                        |
| 0 | 0  | Deafness,  | NA | .   | .        | .     | .                        |
| 0 | 0  | Deafness,  | NA | .   | .        | .     | .                        |
| 0 | 0. | NA         | .  | .   | .        | .     | .                        |
| 0 | 0. | NA         | .  | .   | .        | .     | .                        |
| 0 | 0. | NA         | .  | .   | NUC      | .     | .                        |
| 0 | 0. | NA         | .  | .   | BIOF     | .     | .                        |
| 0 | 0. | NA         | .  | .   | .        | .     | .                        |
| 0 | 0. | NA         | .  | .   | .        | .     | .                        |
| 0 | 0. | NA         | .  | .   | SIGN     | PROT  | PID                      |
| 0 | 0. | NA         | .  | .   | .        | .     | .                        |
| 0 | 0. | NA         | .  | .   | CYT      | (HYDF | .                        |
| 0 | 0  | Arthrogryp | NA | .   | CYT      | (STRL | REACTOME_STRIATED_MUSCI  |
| 0 | 0. | NA         | .  | .   | MUL      | INTRC | CARE.                    |
| 0 | 0. | NA         | .  | .   | DNA      | NUC   | DAM/KEC                  |
| 0 | 0. | NA         | .  | .   | .        | .     | .                        |
| 0 | 0  | Porokeratc | NA | .   | .        | .     | .                        |
| 0 | 0. | NA         | .  | .   | DAM/     | .     | REACTOME_DNA_REPAIR      |
| 0 | 0. | NA         | .  | .   | .        | .     | .                        |

|   |    |              |    |       |           |          |      |      |                          |   |
|---|----|--------------|----|-------|-----------|----------|------|------|--------------------------|---|
| 0 | 0. | NA           | .  | .     | .         | .        | .    | .    | .                        | . |
| 0 | 0. | NA           | .  | SIGN  | CYT(      | ACID.    | .    | .    | .                        | . |
| 0 | 0. | NA           | .  | .     | .         | .        | .    | .    | .                        | . |
| 0 | 0  | Transpositi  | NA | .     | .         | .        | .    | .    | REACTOME_DEVELOPMENTAL   | . |
| 0 | 0  | Spermatog    | NA | .     | SYS       | CELIOXID | KEC. | BIO( | REACTOME_LATENT_INFECTIC | . |
| 0 | 0. | NA           | .  | PRO.  | PHO       | KEC      | PID. | .    | .                        | . |
| 0 | 0. | NA           | .  | .     | .         | .        | .    | .    | .                        | . |
| 0 | 0. | NA           | .  | .     | .         | .        | .    | .    | REACTOME_METABOLISM_OF_  | . |
| 0 | 0. | NA           | .  | .     | .         | .        | .    | .    | .                        | . |
| 0 | 0. | NA           | .  | .     | ORGRNA_.  | .        | .    | .    | REACTOME_INTERFERON_GAI  | . |
| 0 | 0. | NA           | .  | SIGN  | INTRCATI( | KEC.     | .    | .    | .                        | . |
| 0 | 0. | NA           | .  | .     | .         | .        | .    | .    | .                        | . |
| 0 | 0. | NA           | .  | M_PI  | ORGP      | RO1.     | PID. | .    | REACTOME_CELL_CYCLE;REA  | . |
| 0 | 0. | NA           | .  | MIT   | ORG.      | .        | .    | .    | REACTOME_CELL_CYCLE;REA  | . |
| 0 | 0. | NA           | .  | .     | .         | .        | .    | .    | REACTOME_MEMBRANE_TRAF   | . |
| 0 | 0. | NA           | .  | .     | .         | .        | .    | .    | .                        | . |
| 0 | 0. | NA           | .  | .     | .         | .        | .    | .    | .                        | . |
| 0 | 0. | NA           | .  | .     | .         | .        | KEC  | PID. | .                        | . |
| 0 | 0. | NA           | .  | .     | .         | .        | .    | .    | .                        | . |
| 0 | 0. | NA           | .  | .     | .         | .        | .    | .    | .                        | . |
| 0 | 0. | NA           | .  | .     | .         | .        | .    | .    | .                        | . |
| 0 | 0. | NA           | .  | .     | .         | .        | .    | .    | .                        | . |
| 0 | 0. | NA           | .  | .     | .         | .        | .    | .    | .                        | . |
| 0 | 0. | NA           | .  | .     | .         | .        | .    | .    | .                        | . |
| 0 | 0. | NA           | .  | .     | .         | .        | .    | .    | .                        | . |
| 0 | 0. | NA           | .  | .     | .         | .        | .    | .    | .                        | . |
| 0 | 0. | NA           | .  | .     | .         | .        | .    | .    | .                        | . |
| 0 | 0. | NA           | .  | .     | .         | .        | .    | .    | .                        | . |
| 0 | 0. | NA           | .  | .     | .         | .        | KEC. | .    | REACTOME_O_LINKED_GLYCC  | . |
| 0 | 0. | NA           | .  | MITC. | .         | .        | .    | .    | .                        | . |
| 0 | 0. | NA           | .  | .     | .         | .        | .    | .    | .                        | . |
| 0 | 0. | NA           | .  | .     | .         | .        | .    | .    | REACTOME_SIGNALING_BY_FC | . |
| 0 | 0. | NA           | .  | .     | .         | .        | .    | .    | .                        | . |
| 0 | 0  | Muscular d   | NA | .     | MUS       | PRO.     | KEC. | .    | .                        | . |
| 0 | 0. | NA           | .  | MAC.  | .         | .        | KEC. | BIO( | .                        | . |
| 0 | 0  | Keratosis li | NA | .     | .         | .        | KEC. | .    | .                        | . |
| 0 | 0. | NA           | .  | .     | .         | .        | .    | .    | .                        | . |
| 0 | 0. | NA           | .  | DNA   | ORG       | HYDF     | KEC  | PID. | REACTOME_CELL_CYCLE;REA  | . |
| 0 | 0. | NA           | .  | .     | .         | .        | .    | .    | .                        | . |
| 0 | 0. | NA           | .  | .     | .         | .        | .    | .    | .                        | . |
| 0 | 0  | Pulmonary    | NA | .     | .         | .        | KEC  | PID. | .                        | . |
| 0 | 0. | NA           | .  | BIO   | CYT(      | TRAN.    | .    | .    | .                        | . |
| 0 | 0. | NA           | .  | .     | .         | .        | .    | .    | .                        | . |
| 0 | 0. | NA           | .  | .     | .         | .        | .    | .    | .                        | . |
| 0 | 0. | NA           | .  | .     | .         | .        | .    | .    | .                        | . |
| 0 | 0. | NA           | .  | .     | .         | .        | .    | .    | .                        | . |
| 0 | 0. | NA           | .  | .     | .         | .        | .    | .    | .                        | . |
| 0 | 0. | NA           | .  | .     | .         | .        | .    | .    | .                        | . |
| 0 | 0. | NA           | .  | .     | .         | .        | .    | PID. | .                        | . |
| 0 | 0. | NA           | .  | .     | .         | .        | .    | .    | .                        | . |
| 0 | 0. | NA           | .  | .     | CYT(      | .        | .    | .    | .                        | . |
| 0 | 0. | NA           | .  | .     | .         | .        | .    | .    | .                        | . |
| 0 | 0. | NA           | .  | EST/  | INTR.     | .        | .    | .    | .                        | . |
| 0 | 0  | Propionica   | NA | .     | .         | LIGA     | KEC. | .    | REACTOME_MITOCHONDRIAL_  | . |
| 0 | 0. | NA           | .  | .     | .         | .        | .    | .    | .                        | . |

|   |   |             |                             |               |                                    |
|---|---|-------------|-----------------------------|---------------|------------------------------------|
| 0 | 0 | NA          | SYS <sup>+</sup> NUC ACTII. |               |                                    |
| 0 | 0 | Angiopathy  | NA                          | KEC           | PID, BIO( REACTOME_DEVELOPMENTAL   |
| 0 | 0 | NA          |                             | KEC.          | REACTOME_MITOCHONDRIAL_            |
| 0 | 0 | NA          |                             |               |                                    |
| 0 | 0 | NA          |                             |               |                                    |
| 0 | 0 | NA          |                             |               |                                    |
| 0 | 0 | NA          |                             |               | PID.                               |
| 0 | 0 | NA          | SIGN.                       | RECE.         |                                    |
| 0 | 0 | NA          |                             |               |                                    |
| 0 | 0 | NA          |                             |               |                                    |
| 0 | 0 | NA          |                             |               |                                    |
| 0 | 0 | NA          |                             |               |                                    |
| 0 | 0 | NA          | DNA, ORG                    | NUCL.         | BIO(.                              |
| 0 | 0 | NA          |                             |               |                                    |
| 0 | 0 | NA          | RNA.                        | TRAN.         | REACTOME_RNA_POL_II_TRAN           |
| 0 | 0 | NA          |                             |               |                                    |
| 0 | 0 | Lysinuric p | NA                          | EST/INTR.     | REACTOME_CELL_SURFACE_I            |
| 0 | 0 | NA          |                             |               |                                    |
| 0 | 0 | NA          |                             |               |                                    |
| 0 | 0 | NA          |                             |               |                                    |
| 0 | 0 | NA          |                             |               |                                    |
| 0 | 0 | NA          |                             |               |                                    |
| 0 | 0 | NA          |                             |               |                                    |
| 0 | 0 | NA          |                             |               |                                    |
| 0 | 0 | NA          |                             |               |                                    |
| 0 | 0 | NA          |                             |               |                                    |
| 0 | 0 | NA          |                             |               |                                    |
| 0 | 0 | Fanconi ar  | NA                          |               | PID. REACTOME_FANCONI_ANEMIA/      |
| 0 | 0 | NA          |                             |               |                                    |
| 0 | 0 | NA          |                             |               |                                    |
| 0 | 0 | {Asthma, a  | NA                          | SIGN INTR     | RHOI KE C. REACTOME_SIGNALING_BY_G |
| 0 | 0 | NA          |                             |               |                                    |
| 0 | 0 | NA          |                             |               | KEC                                |
| 0 | 0 | NA          |                             |               | KEC                                |
| 0 | 0 | NA          |                             |               | KEC                                |
| 0 | 0 | NA          |                             |               | KEC                                |
| 0 | 0 | NA          |                             |               | KEC                                |
| 0 | 0 | NA          |                             |               | KEC                                |
| 0 | 0 | NA          | CYT(                        | LIGA(         | KEC. REACTOME_METABOLISM_OF_       |
| 0 | 0 | NA          |                             |               |                                    |
| 0 | 0 | Molybdenu   | NA                          |               | BIO( REACTOME_METABOLISM_OF_       |
| 0 | 0 | Bleeding di | NA                          | FOC ADH INTE( | KEC                                |
| 0 | 0 | NA          |                             |               | PID, BIO( REACTOME_CELL_CELL_COMI  |
| 0 | 0 | NA          |                             |               |                                    |
| 0 | 0 | NA          |                             |               |                                    |
| 0 | 0 | NA          |                             |               |                                    |
| 0 | 0 | Glaucoma    | NA                          | EST/PRO.      |                                    |
| 0 | 0 | NA          |                             |               |                                    |
| 0 | 0 | NA          |                             |               |                                    |
| 0 | 0 | NA          |                             |               |                                    |
| 0 | 0 | Spinoceret  | NA                          |               | REACTOME_DOUBLE_STRAND             |
| 0 | 0 | NA          |                             |               |                                    |
| 0 | 0 | NA          |                             |               |                                    |
| 0 | 0 | NA          | SIGN INTR.                  |               | REACTOME_GASTRIN_CREB_5            |
| 0 | 0 | Hydroceph   | NA                          | REG INSC      | PRO1.                              |
| 0 | 0 | NA          |                             |               |                                    |

|   |    |              |    |       |       |       |                          |      |     |                          |
|---|----|--------------|----|-------|-------|-------|--------------------------|------|-----|--------------------------|
| 0 | 0. | NA           | .  | .     | .     | .     | REACTOME_INTERFERON_ALF  |      |     |                          |
| 0 | 0  | Goiter, mul  | NA | MAC.  | HYDF. | PID.  | REACTOME_MICRORNA_MIRN   |      |     |                          |
| 0 | 0. | NA           | .  | .     | .     | .     | .                        |      |     |                          |
| 0 | 0. | NA           | .  | .     | .     | .     | .                        |      |     |                          |
| 0 | 0. | NA           | .  | MUL   | EXTI. | PID.  | REACTOME_ACTIVATED_NOTC  |      |     |                          |
| 0 | 0. | NA           | .  | .     | .     | .     | .                        |      |     |                          |
| 0 | 0. | NA           | .  | .     | .     | .     | .                        |      |     |                          |
| 0 | 0. | NA           | .  | BIO   | CELI  | NUCL. | .                        |      |     |                          |
| 0 | 0. | NA           | .  | .     | .     | .     | .                        |      |     |                          |
| 0 | 0. | NA           | .  | .     | .     | .     | REACTOME_MHC_CLASS_II_AI |      |     |                          |
| 0 | 0. | NA           | .  | .     | .     | .     | .                        |      |     |                          |
| 0 | 0. | NA           | .  | CELI. | RECE. | .     | .                        |      |     |                          |
| 0 | 0  | Breast can   | NA | REG   | MEM   | PHO   | KEC                      | PID  | BIO | REACTOME_SIGNALLING_BY_I |
| 0 | 0. | NA           | .  | .     | .     | .     | .                        | .    | .   | .                        |
| 0 | 0. | NA           | .  | SYS   | INTR  | RECE  | KEC                      | PID. | .   | REACTOME_ACTIVATED_NOTC  |
| 0 | 0. | NA           | .  | RNA.  | .     | .     | .                        | .    | .   | REACTOME_RNA_POL_III_TRA |
| 0 | 0. | NA           | .  | .     | .     | .     | .                        | .    | .   | .                        |
| 0 | 0. | NA           | .  | .     | .     | .     | .                        | .    | .   | .                        |
| 0 | 0. | NA           | .  | .     | .     | .     | .                        | .    | .   | .                        |
| 0 | 0. | NA           | .  | .     | .     | .     | .                        | .    | .   | .                        |
| 0 | 0. | NA           | .  | .     | .     | .     | .                        | .    | .   | .                        |
| 0 | 0. | NA           | .  | .     | .     | .     | .                        | .    | .   | .                        |
| 0 | 0. | NA           | .  | .     | .     | .     | .                        | .    | .   | .                        |
| 0 | 0. | NA           | .  | SYS   | CYT   | RAS_  | KEC.                     | .    | .   | .                        |
| 0 | 0. | NA           | .  | .     | .     | .     | .                        | .    | .   | .                        |
| 0 | 0. | NA           | .  | .     | .     | .     | .                        | .    | .   | .                        |
| 0 | 0. | NA           | .  | .     | .     | .     | .                        | .    | .   | .                        |
| 0 | 0. | NA           | .  | .     | .     | .     | .                        | .    | .   | .                        |
| 0 | 0. | NA           | .  | .     | .     | .     | .                        | .    | .   | .                        |
| 0 | 0. | NA           | .  | .     | .     | .     | .                        | .    | .   | .                        |
| 0 | 0. | NA           | .  | .     | .     | .     | .                        | .    | .   | .                        |
| 0 | 0. | NA           | .  | .     | .     | .     | .                        | .    | .   | .                        |
| 0 | 0. | NA           | .  | .     | .     | .     | .                        | .    | .   | .                        |
| 0 | 0. | NA           | .  | .     | .     | .     | .                        | .    | .   | .                        |
| 0 | 0. | NA           | .  | .     | .     | .     | .                        | .    | .   | .                        |
| 0 | 0. | NA           | .  | .     | .     | .     | .                        | .    | .   | .                        |
| 0 | 0. | NA           | .  | .     | .     | .     | .                        | .    | .   | .                        |
| 0 | 0. | NA           | .  | .     | .     | .     | .                        | .    | .   | .                        |
| 0 | 0. | NA           | .  | .     | .     | .     | .                        | .    | .   | .                        |
| 0 | 0  | [Skin/hair/ε | NA | .     | .     | .     | KEC.                     | .    | .   | REACTOME_TRANSMEMBRANI   |
| 0 | 0  | [Skin/hair/ε | NA | .     | .     | .     | KEC.                     | .    | .   | REACTOME_IMMUNE_SYSTEM   |
| 0 | 0. | NA           | .  | .     | .     | .     | .                        | .    | .   | REACTOME_IMMUNE_SYSTEM   |
| 0 | 0. | NA           | .  | .     | .     | .     | .                        | .    | .   | .                        |
| 0 | 0. | NA           | .  | .     | .     | .     | .                        | .    | .   | .                        |
| 0 | 0. | NA           | .  | .     | .     | .     | .                        | .    | .   | REACTOME_TRANSMISSION_A  |
| 0 | 0. | NA           | .  | .     | .     | .     | .                        | .    | .   | .                        |
| 0 | 0. | NA           | .  | .     | .     | .     | .                        | .    | .   | .                        |
| 0 | 0. | NA           | .  | .     | .     | .     | .                        | .    | .   | .                        |
| 0 | 0. | NA           | .  | EST/. | CATI  | KEC.  | .                        | .    | .   | .                        |
| 0 | 0. | NA           | .  | .     | .     | .     | .                        | .    | .   | .                        |
| 0 | 0. | NA           | .  | .     | .     | .     | KEC.                     | BIO  | .   | REACTOME_DEVELOPMENTAL   |
| 0 | 0  | Platelet PL  | NA | REG.  | LIPA  | KEC   | PID.                     | .    | .   | REACTOME_GASTRIN_CREB_   |
| 0 | 0. | NA           | .  | .     | .     | .     | .                        | .    | .   | REACTOME_DEVELOPMENTAL   |
| 0 | 0. | NA           | .  | .     | .     | .     | .                        | .    | .   | REACTOME_DEVELOPMENTAL   |
| 0 | 0  | Spinoceret   | NA | .     | .     | .     | .                        | .    | .   | .                        |
| 0 | 0. | NA           | .  | ORG.  | .     | .     | .                        | .    | .   | .                        |
| 0 | 0. | NA           | .  | .     | .     | .     | KEC.                     | .    | .   | REACTOME_METABOLISM_OF_  |



|   |              |              |     |     |          |      |      |     |                          |   |
|---|--------------|--------------|-----|-----|----------|------|------|-----|--------------------------|---|
| 0 | 0 Deafness,  | NA           | .   | .   | .        | .    | .    | .   | .                        | . |
| 0 | 0.           | NA           | .   | .   | .        | .    | .    | .   | .                        | . |
| 0 | 0 ?Cataract, | NA           | .   | SEN | .        | .    | KEC  | .   | .                        | . |
| 0 | 0.           | NA           | .   | SIG | .        | .    | .    | .   | .                        | . |
| 0 | 0.           | NA           | .   | .   | .        | .    | KEC  | .   | REACTOME_DEVELOPMENTAL   |   |
| 0 | 0 Acromicric | NA           | .   | SYS | PRO      | CATI | .    | PID | REACTOME_INTEGRIN_CELL_  |   |
| 0 | 0 Acromicric | NA           | CMO | SYS | PRO      | CATI | .    | PID | REACTOME_INTEGRIN_CELL_  |   |
| 0 | 0.           | NA           | .   | .   | .        | .    | .    | .   | .                        | . |
| 0 | 0.           | NA           | .   | .   | .        | .    | .    | .   | .                        | . |
| 0 | 0.           | NA           | .   | .   | .        | .    | .    | .   | REACTOME_TRANSMEMBRANI   |   |
| 0 | 0.           | NA           | .   | .   | .        | .    | .    | .   | .                        | . |
| 0 | 0.           | NA           | .   | .   | .        | .    | .    | .   | .                        | . |
| 0 | 0            | Griscelli sy | NA  | .   | .        | CYT  | .    | .   | REACTOME_DIABETES_PATHV  |   |
| 0 | 0.           | NA           | .   | EST | INTRACTI | .    | .    | .   | REACTOME_TRANSMEMBRANI   |   |
| 0 | 0.           | NA           | .   | MAC | .        | .    | KEC  | .   | .                        | . |
| 0 | 0            | Combined     | NA  | .   | .        | .    | KEC  | .   | .                        | . |
| 0 | 0.           | NA           | .   | .   | .        | .    | .    | .   | .                        | . |
| 0 | 0.           | NA           | .   | .   | .        | .    | .    | .   | .                        | . |
| 0 | 0.           | NA           | .   | .   | .        | .    | .    | .   | .                        | . |
| 0 | 0.           | NA           | .   | .   | .        | .    | .    | .   | .                        | . |
| 0 | 0.           | NA           | .   | .   | .        | .    | .    | .   | .                        | . |
| 0 | 0            | Ceroid lipo  | NA  | .   | REG      | ORG  | PRO  | .   | .                        | . |
| 0 | 0.           | NA           | .   | MUS | INTRCOLL | KEC  | PID  | .   | REACTOME_INTEGRIN_CELL_  |   |
| 0 | 0.           | NA           | .   | .   | .        | .    | .    | .   | .                        | . |
| 0 | 0.           | NA           | .   | .   | .        | .    | .    | .   | .                        | . |
| 0 | 0.           | NA           | .   | .   | .        | .    | .    | .   | .                        | . |
| 0 | 0            | Bardet-Bie   | NA  | .   | CEN      | ORG  | MICR | .   | .                        | . |
| 0 | 0            | Adrenal ins  | NA  | .   | BIO      | .    | OXY  | KEC | REACTOME_METABOLISM_OF   |   |
| 0 | 0.           | NA           | .   | .   | .        | .    | .    | .   | .                        | . |
| 0 | 0.           | NA           | .   | .   | .        | .    | .    | .   | .                        | . |
| 0 | 0.           | NA           | .   | .   | .        | .    | .    | .   | .                        | . |
| 0 | 0.           | NA           | .   | .   | .        | .    | .    | .   | .                        | . |
| 0 | 0.           | NA           | .   | .   | .        | .    | .    | .   | .                        | . |
| 0 | 0.           | NA           | .   | .   | .        | .    | .    | .   | .                        | . |
| 0 | 0.           | NA           | .   | .   | .        | .    | .    | .   | .                        | . |
| 0 | 0            | Tyrosinemi   | NA  | .   | CAR      | .    | .    | KEC | REACTOME_METABOLISM_OF   |   |
| 0 | 0.           | NA           | .   | .   | .        | .    | .    | .   | .                        | . |
| 0 | 0.           | NA           | .   | .   | .        | .    | .    | .   | .                        | . |
| 0 | 0.           | NA           | .   | .   | .        | .    | .    | .   | .                        | . |
| 0 | 0.           | NA           | .   | .   | .        | .    | .    | .   | .                        | . |
| 0 | 0.           | NA           | .   | .   | .        | .    | .    | .   | .                        | . |
| 0 | 0.           | NA           | .   | CEL | .        | .    | PID  | BIO | REACTOME_SIGNALING_BY_R  |   |
| 0 | 0.           | NA           | .   | CYT | .        | .    | .    | .   | .                        | . |
| 0 | 0            | Mitochondr   | NA  | .   | DNA      | CYT  | NUCL | .   | .                        | . |
| 0 | 0.           | NA           | .   | REG | INTRCATI | .    | .    | .   | REACTOME_TRANSMEMBRANI   |   |
| 0 | 0            | Acrocallos   | NA  | .   | .        | .    | .    | .   | .                        | . |
| 0 | 0            | Acrocallos   | NA  | .   | .        | .    | .    | .   | .                        | . |
| 0 | 0.           | NA           | .   | .   | .        | .    | .    | .   | .                        | . |
| 0 | 0.           | NA           | .   | .   | .        | .    | .    | .   | .                        | . |
| 0 | 0            | Weill-Marc   | NA  | .   | .        | .    | .    | .   | .                        | . |
| 0 | 0.           | NA           | .   | .   | .        | .    | .    | .   | .                        | . |
| 0 | 0.           | NA           | .   | .   | .        | .    | .    | .   | .                        | . |
| 0 | 0.           | NA           | .   | CEL | .        | SER  | II   | .   | REACTOME_SIGNALLING_BY_I |   |
| 0 | 0.           | NA           | .   | .   | .        | .    | KEC  | .   | .                        | . |

|   |    |             |    |       |       |          |       |      |                          |     |                        |
|---|----|-------------|----|-------|-------|----------|-------|------|--------------------------|-----|------------------------|
| 0 | 0. | NA          | .  | .     | .     | .        | .     | .    | .                        | .   |                        |
| 0 | 0. | NA          | .  | .     | .     | .        | .     | .    | .                        | .   |                        |
| 0 | 0. | NA          | .  | .     | .     | .        | .     | .    | .                        | .   |                        |
| 0 | 0. | NA          | .  | .     | .     | .        | .     | .    | .                        | .   |                        |
| 0 | 0. | NA          | .  | .     | .     | .        | .     | .    | .                        | .   |                        |
| 0 | 0. | NA          | .  | .     | .     | .        | .     | .    | .                        | .   |                        |
| 0 | 0. | NA          | .  | .     | .     | .        | .     | .    | .                        | .   |                        |
| 0 | 0. | NA          | .  | SIGN. | GTPA. | .        | .     | .    | REACTOME_SIGNALING_BY_G  | .   |                        |
| 0 | 0. | NA          | .  | .     | .     | KEC      | PID.  | .    | .                        | .   |                        |
| 0 | 0. | NA          | .  | .     | .     | .        | .     | .    | .                        | .   |                        |
| 0 | 0. | NA          | .  | REG   | ORG.  | .        | .     | .    | REACTOME_SIGNALING_BY_RI | .   |                        |
| 0 | 0. | NA          | .  | .     | .     | .        | .     | .    | .                        | .   |                        |
| 0 | 0. | NA          | .  | .     | .     | .        | .     | .    | .                        | .   |                        |
| 0 | 0. | NA          | .  | REG.  | .     | .        | .     | .    | .                        | .   |                        |
| 0 | 0. | NA          | .  | .     | .     | .        | .     | .    | .                        | .   |                        |
| 0 | 0  | Lipase defi | NA | .     | .     | .        | .     | .    | .                        | .   |                        |
| 0 | 0  | Somatosta   | NA | .     | SIGN  | INTRNEUF | KEC.  | .    | REACTOME_SIGNALING_BY_G  | .   |                        |
| 0 | 0. | NA          | .  | BIO   | NUC.  | KEC      | PID.  | .    | REACTOME_MEIOSIS;REACTO  | .   |                        |
| 0 | 0. | NA          | .  | REG.  | PRO1. | .        | .     | .    | .                        | .   |                        |
| 0 | 0. | NA          | .  | REG.  | PRO1. | .        | .     | .    | .                        | .   |                        |
| 0 | 0. | NA          | .  | REG.  | PRO1. | .        | .     | .    | .                        | .   |                        |
| 0 | 0. | NA          | .  | REG.  | PRO1. | .        | .     | .    | .                        | .   |                        |
| 0 | 0. | NA          | .  | REG.  | PRO1. | .        | .     | .    | .                        | .   |                        |
| 0 | 0. | NA          | .  | .     | .     | .        | .     | .    | .                        | .   |                        |
| 0 | 0  | Osteopetrc  | NA | .     | .     | .        | .     | .    | .                        | .   |                        |
| 0 | 0. | NA          | .  | .     | .     | .        | .     | .    | .                        | .   |                        |
| 0 | 0. | NA          | .  | .     | .     | .        | .     | .    | .                        | .   |                        |
| 0 | 0. | NA          | .  | EST   | CYT   | KINA     | KEC   | PID. | .                        | .   |                        |
| 0 | 0. | NA          | .  | BIO   | RIBC  | STRU     | KEC.  | .    | REACTOME_TRANSLATION;RE  | .   |                        |
| 0 | 0  | Myopathy,   | NA | .     | .     | .        | .     | .    | REACTOME_MITOCHONDRIAL_  | .   |                        |
| 0 | 0. | NA          | .  | .     | .     | .        | .     | .    | .                        | .   |                        |
| 0 | 0. | NA          | .  | POS   | UBI   | ACID.    | .     | .    | .                        | .   |                        |
| 0 | 0. | NA          | .  | .     | .     | KEC.     | .     | .    | REACTOME_DEVELOPMENTAL   | .   |                        |
| 0 | 0. | NA          | .  | .     | .     | .        | .     | .    | .                        | .   |                        |
| 0 | 0. | NA          | .  | .     | .     | .        | .     | .    | REACTOME_GENERIC_TRANSI  | .   |                        |
| 0 | 0. | NA          | .  | .     | .     | .        | .     | .    | .                        | .   |                        |
| 0 | 0  | Fanconi ar  | NA | .     | .     | .        | .     | .    | .                        | .   |                        |
| 0 | 0  | Rubinstein  | NA | .     | RNA   | CYT      | TRAN  | KEC  | PID                      | BIO | REACTOME_DEVELOPMENTAL |
| 0 | 0  | Rubinstein  | NA | .     | RNA   | CYT      | TRAN  | KEC  | PID                      | BIO | REACTOME_DEVELOPMENTAL |
| 0 | 0  | Rubinstein  | NA | .     | RNA   | CYT      | TRAN  | KEC  | PID                      | BIO | REACTOME_DEVELOPMENTAL |
| 0 | 0. | NA          | .  | .     | INTR  | PHO      | KEC   | PID. | REACTOME_SIGNALLING_BY_I | .   |                        |
| 0 | 0. | NA          | .  | .     | .     | .        | .     | .    | .                        | .   |                        |
| 0 | 0. | NA          | .  | .     | NON   | STRU.    | .     | .    | .                        | .   |                        |
| 0 | 0. | NA          | .  | IMMI. | RNA_  | KEC.     | .     | .    | REACTOME_INTERFERON_GAI  | .   |                        |
| 0 | 0. | NA          | .  | IMMI. | RNA_  | KEC.     | .     | .    | REACTOME_INTERFERON_GAI  | .   |                        |
| 0 | 0. | NA          | .  | .     | .     | .        | .     | .    | .                        | .   |                        |
| 0 | 0. | NA          | .  | CELI  | INTR  | STRU.    | .     | .    | .                        | .   |                        |
| 0 | 0. | NA          | .  | .     | .     | .        | .     | .    | .                        | .   |                        |
| 0 | 0. | NA          | .  | .     | .     | .        | .     | .    | .                        | .   |                        |
| 0 | 0. | NA          | .  | .     | .     | .        | .     | .    | .                        | .   |                        |
| 0 | 0  | Lissencept  | NA | .     | CEN   | ORG      | MICR. | .    | .                        | .   |                        |
| 0 | 0. | NA          | .  | EST   | INTR  | HYDF     | KEC   | PID. | REACTOME_ABC_FAMILY_PRC  | .   |                        |
| 0 | 0. | NA          | .  | .     | .     | .        | .     | .    | .                        | .   |                        |
| 0 | 0. | NA          | .  | BIO   | CYT   | PHO      | .     | .    | REACTOME_METABOLISM_OF_  | .   |                        |



|   |    |              |    |          |          |         |      |                          |
|---|----|--------------|----|----------|----------|---------|------|--------------------------|
| 0 | 0. | NA           | .  | .        | .        | .       | .    | REACTOME_METABOLISM_OF_  |
| 0 | 0. | NA           | .  | .        | .        | .       | .    | REACTOME_METABOLISM_OF_  |
| 0 | 0  | Hyperalph    | NA | REG      | EXTI     | LIPID.  | .    | REACTOME_HDL_MEDIATED_L  |
| 0 | 0. | NA           | .  | .        | .        | .       | .    | .                        |
| 0 | 0. | NA           | .  | .        | .        | .       | .    | .                        |
| 0 | 0. | NA           | .  | .        | .        | .       | .    | .                        |
| 0 | 0. | NA           | .  | MAC.     | .        | .       | .    | .                        |
| 0 | 0. | NA           | .  | .        | .        | .       | .    | .                        |
| 0 | 0. | NA           | .  | .        | .        | .       | .    | .                        |
| 0 | 0. | NA           | .  | .        | .        | .       | .    | .                        |
| 0 | 0. | NA           | .  | INTRCATI | .        | .       | .    | REACTOME_TRANSMEMBRANI   |
| 0 | 0. | NA           | .  | .        | .        | .       | .    | .                        |
| 0 | 0. | NA           | .  | .        | .        | .       | .    | .                        |
| 0 | 0. | NA           | .  | RNA      | NUC      | CATI    | .    | .                        |
| 0 | 0. | NA           | .  | PRO      | EXTI     | .       | .    | .                        |
| 0 | 0. | NA           | .  | REG      | INTRCATI | .       | .    | REACTOME_TRANSMEMBRANI   |
| 0 | 0. | NA           | .  | .        | .        | .       | .    | .                        |
| 0 | 0. | NA           | .  | DNA      | ORGS     | SING.   | PID. | REACTOME_MEIOSIS;REACTO  |
| 0 | 0. | NA           | .  | .        | .        | .       | .    | .                        |
| 0 | 0. | NA           | .  | .        | .        | .       | .    | .                        |
| 0 | 0. | NA           | .  | .        | .        | .       | .    | .                        |
| 0 | 0. | NA           | .  | .        | .        | .       | .    | .                        |
| 0 | 0. | NA           | .  | REG      | ADH      | KINA    | KEC  | PID                      |
| 0 | 0. | NA           | .  | .        | .        | .       | .    | REACTOME_INTEGRIN_CELL_  |
| 0 | 0. | NA           | .  | .        | .        | .       | .    | .                        |
| 0 | 0. | NA           | .  | .        | .        | .       | .    | .                        |
| 0 | 0  | Autoinflam   | NA | .        | .        | KEC     | PID. | REACTOME_ANTIGEN_ACTIVAT |
| 0 | 0  | Malonyl-Co   | NA | COF      | CYT      | LYAS    | KEC. | .                        |
| 0 | 0. | NA           | .  | .        | .        | .       | .    | .                        |
| 0 | 0. | NA           | .  | RNA      | .        | RNA     | .    | REACTOME_RNA_POL_I_TRAN  |
| 0 | 0. | NA           | .  | .        | .        | .       | .    | .                        |
| 0 | 0  | Lympheder    | NA | SYS      | NUC      | TRAN    | .    | .                        |
| 0 | 0. | NA           | .  | .        | .        | .       | .    | .                        |
| 0 | 0  | Huntington   | NA | .        | .        | .       | .    | .                        |
| 0 | 0  | Brittle corn | NA | .        | .        | .       | .    | .                        |
| 0 | 0. | NA           | .  | .        | LYAS     | KEC.    | .    | REACTOME_METABOLISM_OF_  |
| 0 | 0. | NA           | .  | CELI     | .        | PID.    | .    | .                        |
| 0 | 0. | NA           | .  | INTE     | .        | PHOS    | .    | .                        |
| 0 | 0. | NA           | .  | .        | .        | .       | .    | .                        |
| 0 | 0. | NA           | .  | .        | .        | .       | .    | .                        |
| 0 | 0  | Glomerulo    | NA | .        | ORG      | .       | .    | .                        |
| 0 | 0  | Retinitis pi | NA | RNA      | ORGR     | RNA_KEC | .    | REACTOME_PROCESSING_OF_  |
| 0 | 0. | NA           | .  | .        | .        | .       | .    | .                        |
| 0 | 0. | NA           | .  | RNA      | .        | TRAN    | PID  | BIO                      |
| 0 | 0. | NA           | .  | DNA      | ORGT     | TELC    | PID. | REACTOME_METABOLISM_OF_  |
| 0 | 0. | NA           | .  | DNA      | ORGT     | TELC    | PID. | REACTOME_METABOLISM_OF_  |
| 0 | 0. | NA           | .  | RNA      | .        | TRAN    | .    | .                        |
| 0 | 0. | NA           | .  | .        | .        | .       | .    | .                        |
| 0 | 0. | NA           | .  | .        | .        | KEC.    | BIO  | REACTOME_TRANSMISSION_A  |
| 0 | 0. | NA           | .  | ORG      | .        | .       | .    | .                        |
| 0 | 0. | NA           | .  | BIOF     | .        | KEC.    | BIO  | REACTOME_IMMUNE_SYSTEM   |

|   |    |             |    |               |          |                                    |
|---|----|-------------|----|---------------|----------|------------------------------------|
| 0 | 0. | NA          | .  | .             | .        | PID, BIO(                          |
| 0 | 0. | NA          | .  | EST, CYT(     | .        | .                                  |
| 0 | 0. | NA          | .  | .             | .        | .                                  |
| 0 | 0. | NA          | .  | .             | .        | .                                  |
| 0 | 0. | NA          | .  | .             | .        | .                                  |
| 0 | 0. | NA          | .  | .             | .        | REACTOME_TRANSMEMBRANI             |
| 0 | 0. | NA          | .  | MEM/ CARE.    | .        | .                                  |
| 0 | 0. | NA          | .  | .             | .        | .                                  |
| 0 | 0. | NA          | .  | NUC.          | KEC.     | BIO( REACTOME_MICRORNA_MIRN,       |
| 0 | 0. | NA          | .  | .             | .        | .                                  |
| 0 | 0. | NA          | .  | .             | .        | PID.                               |
| 0 | 0. | NA          | .  | NEG.          | TRAN.    | REACTOME_PHOSPHOLIPID_M            |
| 0 | 0. | NA          | .  | GAMORG.       | .        | .                                  |
| 0 | 0. | NA          | .  | GAMORG.       | .        | .                                  |
| 0 | 0. | NA          | .  | SULIINTRSULF  | KEC.     | REACTOME_HS_GAG_BIOSYN             |
| 0 | 0. | NA          | .  | .             | .        | .                                  |
| 0 | 0. | NA          | .  | .             | .        | .                                  |
| 0 | 0. | NA          | .  | RNA.          | TRAN.    | PID, BIO( REACTOME_DEVELOPMENTAL   |
| 0 | 0. | NA          | .  | RNA.          | TRAN.    | PID, BIO( REACTOME_DEVELOPMENTAL   |
| 0 | 0. | NA          | .  | .             | .        | .                                  |
| 0 | 0. | NA          | .  | .             | .        | .                                  |
| 0 | 0  | Deafness,   | NA | SEN:          | .        | .                                  |
| 0 | 0  | Deafness,   | NA | SEN:          | .        | .                                  |
| 0 | 0. | NA          | .  | .             | .        | .                                  |
| 0 | 0. | NA          | .  | .             | .        | .                                  |
| 0 | 0. | NA          | .  | .             | .        | .                                  |
| 0 | 0. | NA          | .  | .             | .        | .                                  |
| 0 | 0. | NA          | .  | RNA.          | PHO( KEC | PID, BIO( REACTOME_TRIF_MEDIATED_  |
| 0 | 0  | {Hypertens  | NA | MUL CYT( OXID | KEC      | PID, BIO( REACTOME_LATENT_INFECTIC |
| 0 | 0. | NA          | .  | INTRCATI(     | .        | REACTOME_TRANSMEMBRANI             |
| 0 | 0. | NA          | .  | INTRCATI(     | .        | REACTOME_TRANSMEMBRANI             |
| 0 | 0. | NA          | .  | .             | .        | .                                  |
| 0 | 0. | NA          | .  | .             | .        | .                                  |
| 0 | 0. | NA          | .  | .             | .        | .                                  |
| 0 | 0. | NA          | .  | .             | .        | .                                  |
| 0 | 0. | NA          | .  | .             | .        | .                                  |
| 0 | 0. | NA          | .  | CELI.         | .        | REACTOME_SIGNALING_BY_F(           |
| 0 | 0  | {Anxiety-re | NA | REG INTRACTI( | .        | .                                  |
| 0 | 0. | NA          | .  | .             | .        | .                                  |
| 0 | 0. | NA          | .  | .             | KEC.     | .                                  |
| 0 | 0. | NA          | .  | .             | .        | .                                  |
| 0 | 0. | NA          | .  | .             | .        | .                                  |
| 0 | 0. | NA          | .  | .             | .        | .                                  |
| 0 | 0. | NA          | .  | .             | .        | .                                  |
| 0 | 0. | NA          | .  | NUC.          | .        | .                                  |
| 0 | 0. | NA          | .  | .             | .        | .                                  |
| 0 | 0. | NA          | .  | .             | KEC.     | REACTOME_SIGNALLING_BY_I           |
| 0 | 0. | NA          | .  | .             | .        | .                                  |
| 0 | 0. | NA          | .  | .             | .        | .                                  |
| 0 | 0. | NA          | .  | .             | .        | .                                  |
| 0 | 0. | NA          | .  | .             | TRAN.    | .                                  |
| 0 | 0. | NA          | .  | .             | .        | .                                  |
| 0 | 0. | NA          | .  | MEM/ CATI(    | KEC.     | REACTOME_DEVELOPMENTAL             |
| 0 | 0. | NA          | .  | BIO(          | STRU     | KEC.                               |
| 0 | 0. | NA          | .  | .             | .        | REACTOME_TRANSLATION;RE            |

|   |   |             |    |     |         |      |     |     |                         |                          |
|---|---|-------------|----|-----|---------|------|-----|-----|-------------------------|--------------------------|
| 0 | 0 | NA          | .  | .   | .       | .    | .   | .   | .                       |                          |
| 0 | 0 | Adenocarc   | NA | SYS | EXTIPHO | KEC  | PID | .   | REACTOME_DEVELOPMENTAL  |                          |
| 0 | 0 | NA          | .  | REG | INTR    | .    | KEC | BIO | REACTOME_SIGNALING_BY_G |                          |
| 0 | 0 | NA          | .  | SYS | .       | .    | .   | .   | .                       |                          |
| 0 | 0 | NA          | .  | MEI | ORG     | .    | .   | .   | .                       |                          |
| 0 | 0 | NA          | .  | .   | CYT     | .    | .   | .   | .                       |                          |
| 0 | 0 | NA          | .  | .   | CYT     | .    | .   | .   | .                       |                          |
| 0 | 0 | Hyper-IgE   | NA | RNA | CYT     | RECE | KEC | PID | BIO                     | REACTOME_SIGNALLING_BY_I |
| 0 | 0 | Hyper-IgE   | NA | RNA | CYT     | RECE | KEC | PID | BIO                     | REACTOME_SIGNALLING_BY_I |
| 0 | 0 | Hyper-IgE   | NA | RNA | CYT     | RECE | KEC | PID | BIO                     | REACTOME_SIGNALLING_BY_I |
| 0 | 0 | NA          | .  | COF | .       | PHO  | KEC | .   | REACTOME_VITAMIN_B5_PAN |                          |
| 0 | 0 | Pseudohyp   | NA | EST | CEL     | NUCL | .   | .   | .                       |                          |
| 0 | 0 | NA          | .  | .   | .       | .    | .   | .   | .                       |                          |
| 0 | 0 | NA          | .  | .   | .       | .    | .   | .   | .                       |                          |
| 0 | 0 | NA          | .  | .   | .       | .    | .   | .   | .                       |                          |
| 0 | 0 | NA          | .  | SIG | INTR    | PHO  | .   | .   | .                       |                          |
| 0 | 0 | NA          | .  | SIG | INTR    | PHO  | .   | .   | .                       |                          |
| 0 | 0 | NA          | .  | SIG | INTR    | PHO  | .   | .   | .                       |                          |
| 0 | 0 | NA          | .  | .   | .       | .    | .   | .   | .                       |                          |
| 0 | 0 | NA          | .  | .   | .       | .    | .   | .   | .                       |                          |
| 0 | 0 | NA          | .  | .   | .       | .    | .   | .   | .                       |                          |
| 0 | 0 | Osteopetr   | NA | .   | .       | .    | .   | .   | .                       |                          |
| 0 | 0 | NA          | .  | .   | .       | .    | .   | .   | .                       |                          |
| 0 | 0 | NA          | .  | .   | .       | .    | .   | .   | .                       |                          |
| 0 | 0 | NA          | .  | .   | .       | .    | KEC | .   | REACTOME_TRANSMISSION_A |                          |
| 0 | 0 | NA          | .  | .   | CYT     | EXOF | .   | .   | REACTOME_IMMUNE_SYSTEM  |                          |
| 0 | 0 | NA          | .  | .   | .       | .    | .   | .   | .                       |                          |
| 0 | 0 | NA          | .  | BIO | LAMI    | .    | .   | .   | .                       |                          |
| 0 | 0 | NA          | .  | .   | .       | .    | .   | .   | .                       |                          |
| 0 | 0 | NA          | .  | .   | .       | .    | .   | .   | .                       |                          |
| 0 | 0 | NA          | .  | REG | NUC     | .    | .   | .   | .                       |                          |
| 0 | 0 | NA          | .  | REG | NUC     | .    | .   | .   | .                       |                          |
| 0 | 0 | Caffey dise | NA | SYS | .       | .    | KEC | PID | REACTOME_DEVELOPMENTAL  |                          |
| 0 | 0 | {Pseudoxa   | NA | .   | .       | .    | KEC | .   | .                       |                          |
| 0 | 0 | NA          | .  | GAM | CYT     | .    | .   | .   | .                       |                          |
| 0 | 0 | NA          | .  | RNA | NUC     | DOU  | .   | .   | .                       |                          |
| 0 | 0 | Fanconi ar  | NA | DNA | NUC     | DNA  | KEC | .   | REACTOME_MEIOSIS;REACTO |                          |
| 0 | 0 | Breast can  | NA | BIO | NUC     | PHO  | KEC | PID | .                       |                          |
| 0 | 0 | Growth hor  | NA | EST | .       | HEM  | KEC | BIO | REACTOME_GROWTH_HORMC   |                          |
| 0 | 0 | Hyperkaler  | NA | EST | .       | CATI | .   | .   | REACTOME_DEVELOPMENTAL  |                          |
| 0 | 0 | NA          | .  | .   | .       | .    | .   | .   | .                       |                          |
| 0 | 0 | NA          | .  | .   | .       | .    | .   | .   | .                       |                          |
| 0 | 0 | NA          | .  | .   | .       | .    | KEC | .   | REACTOME_ABCA_TRANSPOR  |                          |
| 0 | 0 | NA          | .  | .   | .       | .    | .   | .   | .                       |                          |
| 0 | 0 | NA          | .  | BIO | CYT     | ELEC | .   | PID | .                       |                          |
| 0 | 0 | NA          | .  | .   | .       | .    | .   | .   | .                       |                          |
| 0 | 0 | NA          | .  | .   | CYT     | .    | .   | .   | .                       |                          |
| 0 | 0 | NA          | .  | .   | CYT     | .    | .   | .   | .                       |                          |
| 0 | 0 | NA          | .  | .   | .       | .    | .   | .   | .                       |                          |
| 0 | 0 | NA          | .  | DNA | .       | .    | .   | .   | .                       |                          |

|   |    |              |         |      |         |       |      |                          |                          |                        |                         |
|---|----|--------------|---------|------|---------|-------|------|--------------------------|--------------------------|------------------------|-------------------------|
| 0 | 0. | NA           | DNA     | .    | .       | .     | .    | .                        | .                        |                        |                         |
| 0 | 0. | NA           | RES     | .    | OXID    | .     | .    | .                        | .                        |                        |                         |
| 0 | 0. | NA           | .       | .    | .       | .     | .    | .                        | .                        |                        |                         |
| 0 | 0. | NA           | .       | .    | KEC     | .     | .    | .                        | .                        |                        |                         |
| 0 | 0. | NA           | .       | CYT  | .       | .     | .    | .                        | .                        |                        |                         |
| 0 | 0. | NA           | .       | .    | .       | .     | .    | .                        | .                        |                        |                         |
| 0 | 0. | NA           | .       | .    | .       | .     | .    | .                        | .                        |                        |                         |
| 0 | 0. | NA           | CELINUC | TRAN | .       | PID   | .    | .                        | .                        |                        |                         |
| 0 | 0  | Ciliary dysl | NA      | .    | .       | .     | .    | .                        | .                        |                        |                         |
| 0 | 0  | Pityriasis r | NA      | .    | POS CYT | (PRO  | .    | .                        | .                        |                        |                         |
| 0 | 0  | Pityriasis r | NA      | .    | POS CYT | (PRO  | .    | .                        | .                        |                        |                         |
| 0 | 0  | {Moyamoy     | NA      | .    | .       | .     | .    | .                        | .                        |                        |                         |
| 0 | 0. | NA           | .       | .    | KEC     | PID   | .    | REACTOME_INSULIN_RECEPT  |                          |                        |                         |
| 0 | 0. | NA           | SYS     | MEM  | MOL     | KEC   | PID  | BIO                      | .                        |                        |                         |
| 0 | 0. | NA           | .       | .    | .       | .     | .    | .                        | .                        |                        |                         |
| 0 | 0. | NA           | .       | .    | .       | .     | .    | .                        | .                        |                        |                         |
| 0 | 0. | NA           | .       | .    | .       | .     | .    | .                        | .                        |                        |                         |
| 0 | 0. | NA           | .       | .    | .       | .     | .    | .                        | .                        |                        |                         |
| 0 | 0  | Alveolar sc  | NA      | .    | .       | .     | .    | .                        | .                        |                        |                         |
| 0 | 0. | NA           | .       | .    | KEC     | PID   | BIO  | REACTOME_VITAMIN_B5_PAN  |                          |                        |                         |
| 0 | 0. | NA           | .       | .    | KEC     | PID   | BIO  | REACTOME_VITAMIN_B5_PAN  |                          |                        |                         |
| 0 | 0. | NA           | .       | .    | .       | .     | .    | .                        | .                        |                        |                         |
| 0 | 0. | NA           | .       | .    | .       | .     | .    | .                        | .                        |                        |                         |
| 0 | 0  | Seborrhea    | NA      | .    | .       | .     | .    | .                        | .                        |                        |                         |
| 0 | 0. | NA           | MUL     | CEL  | NEUF    | .     | .    | REACTOME_SIGNALLING_BY_I |                          |                        |                         |
| 0 | 0. | NA           | M_P     | ORG  | .       | PID   | .    | REACTOME_CELL_CYCLE;REA  |                          |                        |                         |
| 0 | 0  | Ataxia, spa  | NA      | .    | CYT     | (UNFC | .    | .                        | .                        |                        |                         |
| 0 | 0. | NA           | .       | .    | .       | .     | .    | REACTOME_CELL_CYCLE;REA  |                          |                        |                         |
| 0 | 0  | Glucocortic  | NA      | .    | SIGN    | INTR  | NEUF | KEC                      | REACTOME_SIGNALING_BY_G  |                        |                         |
| 0 | 0. | NA           | .       | .    | .       | .     | .    | .                        | .                        |                        |                         |
| 0 | 0. | NA           | .       | .    | .       | .     | .    | .                        | .                        |                        |                         |
| 0 | 0. | NA           | .       | .    | .       | .     | .    | .                        | .                        |                        |                         |
| 0 | 0. | NA           | .       | .    | .       | .     | .    | .                        | .                        |                        |                         |
| 0 | 0. | NA           | .       | .    | .       | .     | .    | .                        | .                        |                        |                         |
| 0 | 0  | Cardiomyo    | NA      | .    | SYS     | PRO   | .    | KEC                      | PID                      | BIO                    | REACTOME_CELL_CELL_COMI |
| 0 | 0. | NA           | .       | .    | .       | .     | .    | .                        | .                        | .                      |                         |
| 0 | 0. | NA           | RNA     | NUC  | DNA     | .     | .    | .                        | .                        | .                      |                         |
| 0 | 0  | Vici syndro  | NA      | .    | .       | .     | .    | .                        | .                        | .                      |                         |
| 0 | 0. | NA           | .       | .    | .       | .     | .    | .                        | .                        | .                      |                         |
| 0 | 0. | NA           | .       | .    | .       | .     | .    | .                        | .                        | .                      |                         |
| 0 | 0  | Microvillus  | NA      | .    | .       | .     | .    | .                        | REACTOME_TRANSMEMBRANI   |                        |                         |
| 0 | 0. | NA           | .       | .    | .       | .     | .    | .                        | .                        | .                      |                         |
| 0 | 0. | NA           | .       | .    | .       | .     | .    | .                        | .                        | .                      |                         |
| 0 | 0. | NA           | .       | CYT  | .       | .     | .    | .                        | .                        | .                      |                         |
| 0 | 0. | NA           | .       | PRO  | .       | .     | .    | .                        | .                        | .                      |                         |
| 0 | 0. | NA           | .       | .    | .       | .     | .    | .                        | .                        | .                      |                         |
| 0 | 0  | Polymicrog   | NA      | .    | .       | .     | .    | .                        | .                        | .                      |                         |
| 0 | 0. | NA           | .       | .    | .       | .     | .    | .                        | .                        | .                      |                         |
| 0 | 0. | NA           | .       | .    | .       | .     | .    | REACTOME_TRANSMEMBRANI   |                          |                        |                         |
| 0 | 0. | NA           | .       | .    | .       | .     | .    | .                        | .                        | .                      |                         |
| 0 | 0  | [Blood gro   | NA      | .    | SIGN    | .     | .    | PID                      | .                        | REACTOME_PYRUVATE_META |                         |
| 0 | 0. | NA           | RNA     | CYT  | (NUCL   | .     | .    | .                        | REACTOME_TRANSCRIPTION;I |                        |                         |

|   |    |             |      |           |      |       |                          |
|---|----|-------------|------|-----------|------|-------|--------------------------|
| 0 | 0. | NA          | RNA  | CYT(NUCL. |      |       | REACTOME_TRANSCRIPTION;  |
| 0 | 0. | NA          |      | INTR.     |      |       |                          |
| 0 | 0. | NA          | RNA  | NUC RNA_  |      |       | REACTOME_PROCESSING_OF   |
| 0 | 0. | NA          |      |           |      |       |                          |
| 0 | 0. | NA          |      |           |      |       | REACTOME_SIGNALING_BY_R  |
| 0 | 0. | NA          | RNA  | NUC NUCL  | KEC. |       | REACTOME_RNA_POL_III_TRA |
| 0 | 0. | NA          | MEM  | CYT(OXID  | KEC. |       |                          |
| 0 | 0. | NA          |      |           |      |       |                          |
| 0 | 0. | NA          |      |           |      |       |                          |
| 0 | 0. | NA          |      |           |      |       |                          |
| 0 | 0. | NA          |      |           |      |       |                          |
| 0 | 0. | NA          | RES  | RNA_      |      |       |                          |
| 0 | 0. | NA          | GAM. | RNA_      |      |       |                          |
| 0 | 0. | NA          | GAM. | RNA_      |      |       |                          |
| 0 | 0. | NA          |      |           |      |       |                          |
| 0 | 0. | NA          |      |           | KEC. |       |                          |
| 0 | 0. | NA          |      |           |      |       |                          |
| 0 | 0. | NA          |      | CYT(      |      |       |                          |
| 0 | 0. | NA          |      | CYT(      |      |       |                          |
| 0 | 0. | NA          | REG  | INTRLIPID | KEC  | PID.  | REACTOME_SIGNALING_BY_G  |
| 0 | 0. | NA          | RNA. | TRAN.     |      | PID.  |                          |
| 0 | 0. | NA          |      |           |      |       |                          |
| 0 | 0. | NA          |      |           |      |       |                          |
| 0 | 0  | Leukemia,   | NA   | SYS       |      | KEC   | PID.                     |
| 0 | 0. | NA          |      |           |      |       |                          |
| 0 | 0. | NA          |      |           |      | KEC.  |                          |
| 0 | 0. | NA          |      |           |      |       |                          |
| 0 | 0. | NA          | ORG  | NUC       | DOU  |       | PID.                     |
| 0 | 0. | NA          |      |           |      |       |                          |
| 0 | 0. | NA          |      |           |      |       |                          |
| 0 | 0. | NA          |      |           | TRAN | KEC   | PID                      |
| 0 | 0. | NA          |      |           |      | BIO(  | REACTOME_SIGNALING_BY_R  |
| 0 | 0. | NA          |      |           |      | PID   | BIO(                     |
| 0 | 0  | Spastic pai | NA   |           |      |       |                          |
| 0 | 0. | NA          | DNA. |           |      | KEC.  | REACTOME_TRANSCRIPTION_  |
| 0 | 0. | NA          | DNA. |           |      | KEC.  | REACTOME_TRANSCRIPTION_  |
| 0 | 0  | Hemophag    | NA   |           |      |       |                          |
| 0 | 0  | {Dengue fe  | NA   | MUL.      |      | CARE. |                          |
| 0 | 0  | {Dengue fe  | NA   | MUL.      |      | CARE. |                          |
| 0 | 0. | NA          |      |           |      |       |                          |
| 0 | 0. | NA          |      |           |      |       |                          |
| 0 | 0  | Methylmalc  | NA   |           |      | CYT(  |                          |
| 0 | 0. | NA          |      |           |      |       |                          |
| 0 | 0. | NA          |      |           |      |       |                          |
| 0 | 0. | NA          |      |           |      |       |                          |
| 0 | 0. | NA          |      |           |      |       |                          |
| 0 | 0. | NA          |      | MEM.      |      |       | REACTOME_O_LINKED_GLYCC  |
| 0 | 0. | NA          |      | MEM.      |      |       | REACTOME_O_LINKED_GLYCC  |
| 0 | 0. | NA          |      | MEM.      |      |       | REACTOME_O_LINKED_GLYCC  |
| 0 | 0. | NA          |      |           |      |       |                          |
| 0 | 0. | NA          | M_P  | NUC.      |      | KEC   | PID                      |
| 0 | 0. | NA          |      |           |      | BIO(  | REACTOME_ANTIVIRAL_MECH  |
| 0 | 0. | NA          |      |           |      |       |                          |
| 0 | 0. | NA          |      |           |      |       |                          |



|   |               |    |              |                |       |                             |                               |                               |
|---|---------------|----|--------------|----------------|-------|-----------------------------|-------------------------------|-------------------------------|
| 0 | 0             | NA | RNA NUC.     |                |       |                             |                               |                               |
| 0 | 0             | NA | G_PIINTRRECE | KEC.           |       | REACTOME_GASTRIN_CREB_S     |                               |                               |
| 0 | 0 {Malaria, c | NA | INTRRECE     | KEC            | PID   | BIO( REACTOME_IMMUNOREGULAT |                               |                               |
| 0 | 0             | NA | INTR.        |                |       |                             |                               |                               |
| 0 | 0 Tyrosine ki | NA | BIOF.        | PHO $\epsilon$ | KEC   | PID                         | BIO( REACTOME_SIGNALING_BY_IL |                               |
| 0 | 0             | NA | SIGNINSCHYDF | KEC.           |       |                             |                               |                               |
| 0 | 0             | NA | EST/ORG      | MICR           | KEC.  |                             |                               |                               |
| 0 | 0             | NA |              |                |       |                             |                               |                               |
| 0 | 0 Hyperchole  | NA | GLY(INTR     | LIPID          | KEC.  |                             | REACTOME_METABOLISM_OF        |                               |
| 0 | 0 Hyperchole  | NA | GLY(INTR     | LIPID          | KEC.  |                             | REACTOME_METABOLISM_OF        |                               |
| 0 | 0 Adams-Oli   | NA |              |                |       | PID.                        | REACTOME_FACTORS_INVOL        |                               |
| 0 | 0             | NA |              |                |       |                             |                               |                               |
| 0 | 0             | NA | REG.         |                |       |                             |                               |                               |
| 0 | 0 Mannosido   | NA | GLY(.        | HYDF           | KEC.  |                             |                               |                               |
| 0 | 0             | NA |              |                |       |                             |                               |                               |
| 0 | 0             | NA | IMMI.        | RNA_.          |       |                             |                               |                               |
| 0 | 0             | NA |              |                |       | KEC                         | PID                           | BIO( REACTOME_SIGNALLING_BY_I |
| 0 | 0             | NA |              |                |       |                             |                               |                               |
| 0 | 0             | NA |              |                |       | KEC.                        |                               | REACTOME_SIGNALING_BY_G       |
| 0 | 0             | NA |              |                |       |                             |                               |                               |
| 0 | 0             | NA |              |                |       |                             |                               | REACTOME_SIGNALING_BY_EI      |
| 0 | 0             | NA |              |                |       |                             |                               |                               |
| 0 | 0 {Celiac dis | NA | EST/ORG      | HYDF.          |       | PID.                        |                               | REACTOME_SIGNALING_BY_RI      |
| 0 | 0             | NA |              |                |       |                             |                               |                               |
| 0 | 0             | NA |              |                |       | PRO1.                       |                               |                               |
| 0 | 0             | NA |              |                |       |                             |                               |                               |
| 0 | 0             | NA |              |                |       |                             |                               |                               |
| 0 | 0             | NA |              |                |       |                             |                               |                               |
| 0 | 0             | NA |              |                |       |                             |                               |                               |
| 0 | 0             | NA |              |                |       | HYDF                        | KEC.                          | REACTOME_SIGNALING_BY_G       |
| 0 | 0             | NA | DNA          | ORG            | HYDF. |                             |                               |                               |
| 0 | 0             | NA |              |                |       |                             |                               |                               |
| 0 | 0             | NA |              |                |       |                             |                               |                               |
| 0 | 0             | NA |              |                |       |                             |                               | REACTOME_GENERIC_TRANSI       |
| 0 | 0             | NA |              |                |       |                             |                               |                               |
| 0 | 0             | NA |              |                |       |                             |                               |                               |
| 0 | 0             | NA |              |                |       |                             |                               |                               |
| 0 | 0 Hemolytic   | NA | REG.         |                |       | KEC.                        | BIO(                          | REACTOME_GLYCOLYSIS;REA       |
| 0 | 0             | NA | IMMI         | INTR.          |       | KEC                         | PID.                          |                               |
| 0 | 0             | NA |              |                |       |                             |                               |                               |
| 0 | 0 Microceph   | NA |              |                |       |                             |                               |                               |
| 0 | 0             | NA | RNA NUC      | CARE.          |       |                             |                               |                               |
| 0 | 0             | NA |              |                |       |                             |                               | REACTOME_GENERIC_TRANSI       |
| 0 | 0             | NA |              |                |       |                             |                               |                               |
| 0 | 0             | NA |              |                |       |                             |                               |                               |
| 0 | 0             | NA |              |                |       |                             |                               |                               |
| 0 | 0             | NA |              |                |       |                             |                               |                               |
| 0 | 0             | NA |              |                |       |                             |                               |                               |
| 0 | 0             | NA |              |                |       |                             |                               |                               |
| 0 | 0             | NA |              |                |       |                             |                               |                               |
| 0 | 0             | NA | REG          | MEM            | LIPID | KEC                         | PID.                          |                               |
| 0 | 0 Central cor | NA | EST/INTR     | CATI(          | KEC.  |                             |                               |                               |
| 0 | 0 Central cor | NA | EST/INTR     | CATI(          | KEC.  |                             |                               |                               |

|   |               |      |       |      |       |      |     |                          |
|---|---------------|------|-------|------|-------|------|-----|--------------------------|
| 0 | 0 .           | NA . | SYS . | NUC  | KEC   | PID  | BIO | .                        |
| 0 | 0 .           | NA . | .     | NUC  | RNA   | .    | .   | REACTOME_PROCESSING_OF   |
| 0 | 0 .           | NA . | MUS   | ORGC | ATI   | .    | PID | .                        |
| 0 | 0 .           | NA . | .     | .    | .     | .    | .   | .                        |
| 0 | 0 .           | NA . | .     | .    | .     | .    | .   | .                        |
| 0 | 0 Cold-induc  | NA . | MUL   | .    | .     | .    | .   | .                        |
| 0 | 0 .           | NA . | RNA   | NUC  | TRAN  | .    | .   | BIO                      |
| 0 | 0 .           | NA . | .     | .    | .     | .    | .   | .                        |
| 0 | 0 .           | NA . | .     | .    | .     | .    | .   | .                        |
| 0 | 0 .           | NA . | .     | .    | .     | .    | .   | .                        |
| 0 | 0 .           | NA . | .     | .    | .     | .    | .   | .                        |
| 0 | 0 Cutis laxa, | NA . | REG   | PRO  | CATI  | .    | .   | .                        |
| 0 | 0 Cutis laxa, | NA . | REG   | PRO  | CATI  | .    | .   | .                        |
| 0 | 0 .           | NA . | SYS   | .    | .     | KEC  | .   | .                        |
| 0 | 0 .           | NA . | .     | .    | .     | .    | .   | .                        |
| 0 | 0 .           | NA . | RNA   | ORGR | NA    | .    | .   | REACTOME_PROCESSING_OF   |
| 0 | 0 Camurati-E  | NA . | REG   | PRO  | TRAN  | KEC  | PID | BIO                      |
| 0 | 0 .           | NA . | CELI  | MEN  | RAS   | _KEC | PID | BIO                      |
| 0 | 0 Carpenter : | NA . | .     | .    | .     | .    | .   | .                        |
| 0 | 0 .           | NA . | IMMI  | INTR | .     | .    | .   | .                        |
| 0 | 0 .           | NA . | MUL   | .    | .     | .    | .   | .                        |
| 0 | 0 .           | NA . | .     | .    | .     | .    | .   | .                        |
| 0 | 0 .           | NA . | .     | .    | .     | .    | .   | .                        |
| 0 | 0 .           | NA . | .     | .    | .     | .    | .   | .                        |
| 0 | 0 .           | NA . | .     | .    | .     | .    | .   | .                        |
| 0 | 0 .           | NA . | .     | .    | .     | .    | .   | .                        |
| 0 | 0 .           | NA . | .     | .    | .     | .    | .   | .                        |
| 0 | 0 Deafness,   | NA . | .     | .    | .     | .    | .   | .                        |
| 0 | 0 Leukemia/I  | NA . | POS   | CYT  | (PRO) | .    | PID | .                        |
| 0 | 0 [Blood gro  | NA . | SIG   | INTR | RECE  | .    | .   | .                        |
| 0 | 0 .           | NA . | .     | .    | .     | KEC  | .   | REACTOME_MITOCHONDRIAL   |
| 0 | 0 .           | NA . | SIG   | INTR | .     | .    | .   | REACTOME_GASTRIN_CREB_S  |
| 0 | 0 .           | NA . | .     | .    | .     | .    | .   | .                        |
| 0 | 0 .           | NA . | SIG   | CYT  | (STR) | .    | .   | .                        |
| 0 | 0 .           | NA . | .     | .    | .     | KEC  | .   | REACTOME_TRANSMEMBRANI   |
| 0 | 0 Cone-rod r  | NA . | SYS   | .    | .     | .    | .   | .                        |
| 0 | 0 .           | NA . | .     | .    | .     | .    | .   | .                        |
| 0 | 0 .           | NA . | .     | .    | .     | .    | .   | .                        |
| 0 | 0 .           | NA . | .     | .    | .     | KEC  | PID | .                        |
| 0 | 0 .           | NA . | .     | .    | .     | KEC  | .   | REACTOME_DEVELOPMENTAL   |
| 0 | 0 Deafness,   | NA . | .     | .    | .     | KEC  | .   | REACTOME_DEVELOPMENTAL   |
| 0 | 0 .           | NA . | NEG   | CYT  | .     | .    | PID | .                        |
| 0 | 0 Mandibular  | NA . | DNA   | NUC  | NUC   | KEC  | .   | REACTOME_BASE_EXCISION_I |
| 0 | 0 Mandibular  | NA . | DNA   | NUC  | NUC   | KEC  | .   | REACTOME_BASE_EXCISION_I |
| 0 | 0 Mandibular  | NA . | DNA   | NUC  | NUC   | KEC  | .   | REACTOME_BASE_EXCISION_I |
| 0 | 0 .           | NA . | .     | .    | .     | .    | .   | .                        |
| 0 | 0 .           | NA . | .     | .    | .     | STR  | .   | REACTOME_STRIATED_MUSCI  |

|   |    |               |    |              |              |      |                         |                         |                          |
|---|----|---------------|----|--------------|--------------|------|-------------------------|-------------------------|--------------------------|
| 0 | 0. | NA            | .  | .            | STRL.        | .    | REACTOME_STRIATED_MUSCI |                         |                          |
| 0 | 0. | NA            | .  | SIGN         | INTR.        | .    | .                       |                         |                          |
| 0 | 0. | NA            | .  | .            | .            | .    | .                       |                         |                          |
| 0 | 0. | NA            | .  | .            | .            | .    | .                       |                         |                          |
| 0 | 0. | NA            | .  | .            | .            | .    | .                       |                         |                          |
| 0 | 0. | NA            | .  | .            | .            | .    | .                       |                         |                          |
| 0 | 0. | NA            | .  | .            | .            | KEC. | REACTOME_TRANSMISSION_A |                         |                          |
| 0 | 0  | Retinitis piç | NA | .            | RNA NUC RIBO | KEC. | .                       |                         |                          |
| 0 | 0. | NA            | .  | .            | .            | .    | .                       |                         |                          |
| 0 | 0. | NA            | .  | SIGN         | INTR         | RECE | KEC.                    | REACTOME_IMMUNOREGULAT  |                          |
| 0 | 0. | NA            | .  | .            | INTR.        | .    | .                       |                         |                          |
| 0 | 0. | NA            | .  | .            | .            | .    | .                       |                         |                          |
| 0 | 0. | NA            | .  | CELL.        | .            | .    | REACTOME_INTEGRATION_OF |                         |                          |
| 0 | 0. | NA            | .  | .            | .            | .    | .                       |                         |                          |
| 0 | 0. | NA            | .  | .            | .            | .    | .                       |                         |                          |
| 0 | 0. | NA            | .  | .            | .            | .    | REACTOME_GENERIC_TRANSI |                         |                          |
| 0 | 0. | NA            | .  | .            | .            | .    | REACTOME_GENERIC_TRANSI |                         |                          |
| 0 | 0. | NA            | .  | .            | .            | .    | REACTOME_GENERIC_TRANSI |                         |                          |
| 0 | 0. | NA            | .  | .            | .            | .    | .                       |                         |                          |
| 0 | 0. | NA            | .  | .            | EXTI.        | .    | .                       |                         |                          |
| 0 | 0. | NA            | .  | .            | MEM.         | .    | REACTOME_CELL_CELL_COMI |                         |                          |
| 0 | 0  | Spinoceret    | NA | .            | .            | .    | .                       |                         |                          |
| 0 | 0  | Spinoceret    | NA | .            | RNA ORGRNA_. | .    | REACTOME_ASSOCIATION_OF |                         |                          |
| 0 | 0. | NA            | .  | .            | .            | .    | .                       |                         |                          |
| 0 | 0. | NA            | .  | .            | .            | .    | REACTOME_DEVELOPMENTAL  |                         |                          |
| 0 | 0. | NA            | .  | .            | .            | .    | .                       |                         |                          |
| 0 | 0. | NA            | .  | .            | .            | .    | .                       |                         |                          |
| 0 | 0. | NA            | .  | .            | .            | .    | .                       |                         |                          |
| 0 | 0. | NA            | .  | .            | NUC.         | .    | .                       |                         |                          |
| 0 | 0. | NA            | .  | .            | .            | .    | .                       |                         |                          |
| 0 | 0. | NA            | .  | .            | .            | .    | .                       |                         |                          |
| 0 | 0  | Polyneuroç    | NA | .            | .            | .    | .                       |                         |                          |
| 0 | 0. | NA            | .  | .            | .            | .    | .                       |                         |                          |
| 0 | 0. | NA            | .  | .            | .            | .    | .                       |                         |                          |
| 0 | 0. | NA            | .  | .            | .            | .    | .                       |                         |                          |
| 0 | 0. | NA            | .  | .            | .            | .    | .                       |                         |                          |
| 0 | 0. | NA            | .  | .            | CYT(.        | .    | .                       |                         |                          |
| 0 | 0. | NA            | .  | .            | .            | .    | .                       |                         |                          |
| 0 | 0. | NA            | .  | PHO ORGLIPID | KEC.         | .    | REACTOME_METABOLISM_OF_ |                         |                          |
| 0 | 0. | NA            | .  | EST/ORG      | PRO1.        | .    | .                       |                         |                          |
| 0 | 0. | NA            | .  | CEN ORG      | KINA:        | .    | REACTOME_CELL_CYCLE;REA |                         |                          |
| 0 | 0. | NA            | .  | BIO ORG      | PRO1.        | .    | REACTOME_METABOLISM_OF_ |                         |                          |
| 0 | 0. | NA            | .  | .            | NUC.         | .    | .                       |                         |                          |
| 0 | 0  | Mental retâ   | NA | .            | .            | KEC  | PID.                    | REACTOME_TRANSMISSION_A |                          |
| 0 | 0. | NA            | .  | .            | .            | .    | .                       |                         |                          |
| 0 | 0. | NA            | .  | .            | CYT(.        | .    | .                       |                         |                          |
| 0 | 0. | NA            | .  | .            | .            | .    | .                       |                         |                          |
| 0 | 0. | NA            | .  | .            | .            | .    | .                       |                         |                          |
| 0 | 0. | NA            | .  | .            | .            | .    | .                       |                         |                          |
| 0 | 0. | NA            | .  | .            | .            | .    | .                       |                         |                          |
| 0 | 0  | DNA topoiç    | NA | .            | RES          | NUC  | CHRC.                   | PID.                    |                          |
| 0 | 0. | NA            | .  | .            | CYT(.        | KEC  | PID.                    | BIO(                    | REACTOME_SIGNALLING_BY_I |

|   |    |            |                  |       |                         |                         |                         |
|---|----|------------|------------------|-------|-------------------------|-------------------------|-------------------------|
| 0 | 0. | NA         | ENZ' INTRPRO1.   | .     | .                       | .                       |                         |
| 0 | 0. | NA         | ENZ' INTRPRO1.   | .     | .                       | .                       |                         |
| 0 | 0. | NA         | SIGN' CELI.      | .     | .                       | .                       |                         |
| 0 | 0. | NA         | MUL' EXTI.       | .     | .                       | .                       |                         |
| 0 | 0. | NA         | .                | .     | .                       | REACTOME_TRANSMEMBRANI  |                         |
| 0 | 0. | NA         | .                | .     | PID.                    | .                       |                         |
| 0 | 0. | NA         | .                | .     | .                       | REACTOME_TRANSMEMBRANI  |                         |
| 0 | 0. | NA         | .                | .     | .                       | .                       |                         |
| 0 | 0. | NA         | .                | .     | .                       | REACTOME_NEURONAL_SYST  |                         |
| 0 | 0. | NA         | .                | .     | .                       | REACTOME_TRANSMEMBRANI  |                         |
| 0 | 0. | NA         | .                | .     | .                       | .                       |                         |
| 0 | 0. | NA         | TRAN.            | .     | .                       | .                       |                         |
| 0 | 0. | NA         | .                | .     | .                       | .                       |                         |
| 0 | 0  | ACTH-inde  | REG EXTIHYDFKEC. | BIO   | REACTOME_SIGNALING_BY_G |                         |                         |
| 0 | 0  | ACTH-inde  | REG EXTIHYDFKEC. | BIO   | REACTOME_SIGNALING_BY_G |                         |                         |
| 0 | 0. | NA         | .                | .     | .                       | REACTOME_MEIOSIS;REACTO |                         |
| 0 | 0. | NA         | .                | .     | .                       | .                       |                         |
| 0 | 0  | Epiphyseal | PRO.             | PID.  | REACTOME_DEVELOPMENTAL  |                         |                         |
| 0 | 0  | Epiphyseal | PRO.             | PID.  | REACTOME_DEVELOPMENTAL  |                         |                         |
| 0 | 0. | NA         | .                | KEC   | PID.BIO                 | REACTOME_COPI_MEDIATED_ |                         |
| 0 | 0. | NA         | .                | .     | .                       | .                       |                         |
| 0 | 0. | NA         | .                | .     | .                       | .                       |                         |
| 0 | 0. | NA         | .                | .     | .                       | .                       |                         |
| 0 | 0. | NA         | .                | .     | .                       | .                       |                         |
| 0 | 0. | NA         | .                | .     | .                       | .                       |                         |
| 0 | 0. | NA         | .                | .     | .                       | .                       |                         |
| 0 | 0. | NA         | .                | .     | .                       | .                       |                         |
| 0 | 0. | NA         | .                | .     | .                       | .                       |                         |
| 0 | 0. | NA         | .                | .     | .                       | .                       |                         |
| 0 | 0. | NA         | .                | .     | .                       | .                       |                         |
| 0 | 0. | NA         | .                | .     | .                       | .                       |                         |
| 0 | 0. | NA         | BIOF INTRPRO1.   | .     | .                       | .                       |                         |
| 0 | 0. | NA         | BIOF INTRPRO1.   | .     | .                       | .                       |                         |
| 0 | 0. | NA         | .                | .     | .                       | .                       |                         |
| 0 | 0. | NA         | .                | .     | .                       | .                       |                         |
| 0 | 0. | NA         | .                | .     | .                       | .                       |                         |
| 0 | 0. | NA         | .                | .     | .                       | .                       |                         |
| 0 | 0. | NA         | .                | .     | .                       | .                       |                         |
| 0 | 0. | NA         | .                | .     | .                       | .                       |                         |
| 0 | 0. | NA         | CELI INTR.       | KEC.  | .                       | .                       |                         |
| 0 | 0. | NA         | .                | KEC   | PID.                    | REACTOME_CELL_SURFACE_I |                         |
| 0 | 0  | Alzheimer  | REG INTRPRO1     | KEC   | PID.BIO                 | REACTOME_TRIF_MEDIATED_ |                         |
| 0 | 0. | NA         | .                | .     | .                       | .                       |                         |
| 0 | 0. | NA         | .                | .     | .                       | .                       |                         |
| 0 | 0. | NA         | SIGN.            | PHOS. | .                       | .                       |                         |
| 0 | 0. | NA         | SIGN.            | PHOS. | .                       | .                       |                         |
| 0 | 0. | NA         | EST).            | PHOS  | KEC                     | PID.BIO                 | REACTOME_PHOSPHOLIPID_M |
| 0 | 0. | NA         | .                | .     | .                       | .                       |                         |
| 0 | 0. | NA         | RES INTRRECE     | KEC   | PID.BIO                 | REACTOME_INTERFERON_ALF |                         |
| 0 | 0. | NA         | EST).            | .     | PID.                    | REACTOME_SIGNALING_BY_R |                         |
| 0 | 0. | NA         | .                | .     | .                       | .                       |                         |
| 0 | 0. | NA         | .                | .     | .                       | .                       |                         |
| 0 | 0. | NA         | .                | .     | .                       | .                       |                         |
| 0 | 0. | NA         | INTR.            | .     | .                       | .                       |                         |

|   |    |                |               |          |      |                              |
|---|----|----------------|---------------|----------|------|------------------------------|
| 0 | 0. | NA             | NUC.          |          |      |                              |
| 0 | 0. | NA             |               | KEC.     |      |                              |
| 0 | 0. | NA             | SYS INTR.     | PID.     |      | REACTOME_CELL_CELL_COMI      |
| 0 | 0. | NA             | SYS INTR.     | PID.     |      | REACTOME_CELL_CELL_COMI      |
| 0 | 0. | NA             | SYS INTR.     | PID.     |      | REACTOME_CELL_CELL_COMI      |
| 0 | 0. | NA             | SYS INTR.     | PID.     |      | REACTOME_CELL_CELL_COMI      |
| 0 | 0. | NA             | EST/          |          |      |                              |
| 0 | 0. | NA             |               | PID.     |      |                              |
| 0 | 0. | NA             | CYT/          |          |      |                              |
| 0 | 0. | NA             |               |          |      |                              |
| 0 | 0. | NA             |               |          |      |                              |
| 0 | 0. | NA             | RNA NUC.      | KEC.     |      | REACTOME_PROCESSING_OF       |
| 0 | 0. | NA             | ORG.          |          |      |                              |
| 0 | 0. | NA             | SIGN.         |          |      |                              |
| 0 | 0. | NA             | EST/INTRCATI/ |          |      |                              |
| 0 | 0  | Leukocyte NA   | BIOF.         | KINA:KEC | PID. | BIO( REACTOME_IMMUNOREGULAT  |
| 0 | 0. | NA             | EST/INTRCOF/  |          |      | REACTOME_METABOLISM_OF       |
| 0 | 0  | Bethlem m NA   |               | KEC      | PID. | REACTOME_DEVELOPMENTAL       |
| 0 | 0  | Glutamate NA   | COF.CYT/      | KEC.     |      | REACTOME_METABOLISM_OF       |
| 0 | 0. | NA             |               |          |      |                              |
| 0 | 0  | Microcephr NA  | ANA           |          |      | BIO( REACTOME_CELL_CYCLE;REA |
| 0 | 0. | NA             |               |          |      |                              |
| 0 | 0. | NA             |               |          |      |                              |
| 0 | 0. | NA             |               |          |      |                              |
| 0 | 0. | NA             |               |          |      |                              |
| 0 | 0. | NA             |               |          |      |                              |
| 0 | 0  | DiGeorge s NA  | SYS           |          |      |                              |
| 0 | 0  | DiGeorge s NA  | SYS           |          |      |                              |
| 0 | 0. | NA             |               |          |      |                              |
| 0 | 0. | NA             |               |          |      |                              |
| 0 | 0. | NA             |               |          |      |                              |
| 0 | 0. | NA             | PHO ORGPHO    | KEC      | PID. | REACTOME_SYNTHESIS_OF_F      |
| 0 | 0. | NA             | NUC PRO1.     |          |      |                              |
| 0 | 0. | NA             |               |          |      |                              |
| 0 | 0. | NA             |               |          |      |                              |
| 0 | 0  | Mental rets NA | DNA NUC.      |          | PID. |                              |
| 0 | 0. | NA             |               |          |      |                              |
| 0 | 0. | NA             | REG INTR.     | KEC      | PID. | REACTOME_SIGNALLING_BY_I     |
| 0 | 0  | Beta-ureidc NA |               | HYDF     | KEC. | REACTOME_PYRIMIDINE_CAT/     |
| 0 | 0  | Glutathioni NA | CAR.          |          | KEC. | REACTOME_BIOLOGICAL_OXII     |
| 0 | 0. | NA             |               |          |      |                              |
| 0 | 0. | NA             |               |          |      |                              |
| 0 | 0. | NA             |               |          |      |                              |
| 0 | 0. | NA             |               |          |      |                              |
| 0 | 0. | NA             |               |          |      |                              |
| 0 | 0. | NA             | MUSNONACTII.  |          |      |                              |
| 0 | 0. | NA             |               |          |      |                              |
| 0 | 0. | NA             |               |          |      |                              |
| 0 | 0. | NA             |               |          |      |                              |
| 0 | 0  | Muscular d NA  | REG ORGTRAN.  |          |      |                              |
| 0 | 0. | NA             | DNA NUC.      | KEC.     |      | BIO( REACTOME_ACTIVATION_OF_ |
| 0 | 0  | Deafness, NA   | REG ORGHYDF   | KEC.     |      | REACTOME_DEVELOPMENTAL       |

|   |   |              |    |     |               |          |       |      |     |                          |                         |
|---|---|--------------|----|-----|---------------|----------|-------|------|-----|--------------------------|-------------------------|
| 0 | 0 | Surfactant   | NA | .   | RES INTRINTEI | KEC      | PID   | BIO  | (   | REACTOME_SIGNALING_BY_IL |                         |
| 0 | 0 | .            | NA | .   | .             | .        | .     | .    | .   | .                        |                         |
| 0 | 0 | Infantile ne | NA | CM1 | MEM.          | LIPAS    | KEC.  | .    | .   | REACTOME_ACYL_CHAIN_REM  |                         |
| 0 | 0 | .            | NA | .   | RNA           | .        | .     | .    | BIO | (                        | REACTOME_FACTORS_INVOL  |
| 0 | 0 | .            | NA | .   | .             | .        | .     | .    | .   | .                        |                         |
| 0 | 0 | .            | NA | .   | EST INTRCATI  | (        | .     | .    | .   | REACTOME_TRANSMISSION_A  |                         |
| 0 | 0 | .            | NA | .   | EST INTRCATI  | (        | .     | .    | .   | REACTOME_TRANSMISSION_A  |                         |
| 0 | 0 | .            | NA | .   | SIGN.         | GTP_     | .     | .    | .   | .                        |                         |
| 0 | 0 | .            | NA | .   | RNA           | ORGCATI  | (     | .    | .   | .                        |                         |
| 0 | 0 | .            | NA | .   | SIGN.         | .        | KEC.  | .    | .   | REACTOME_DEVELOPMENTAL   |                         |
| 0 | 0 | .            | NA | .   | .             | .        | .     | .    | .   | REACTOME_PRE_NOTCH_TRA   |                         |
| 0 | 0 | .            | NA | .   | REG           | INTRNEUF | KEC.  | .    | .   | REACTOME_GASTRIN_CREB_   |                         |
| 0 | 0 | .            | NA | .   | RNA           | NUC      | NUCL  | KEC. | .   | REACTOME_RNA_POL_III_TRA |                         |
| 0 | 0 | .            | NA | .   | RNA           | NUC      | NUCL  | KEC. | .   | REACTOME_RNA_POL_III_TRA |                         |
| 0 | 0 | .            | NA | .   | .             | .        | .     | .    | .   | REACTOME_CELL_CYCLE;REA  |                         |
| 0 | 0 | .            | NA | .   | .             | .        | .     | .    | .   | .                        |                         |
| 0 | 0 | .            | NA | .   | .             | .        | .     | .    | .   | .                        |                         |
| 0 | 0 | .            | NA | .   | LIPI          | INTRTRAN | KEC.  | .    | .   | REACTOME_PHOSPHOLIPID_M  |                         |
| 0 | 0 | .            | NA | .   | .             | .        | .     | .    | .   | .                        |                         |
| 0 | 0 | .            | NA | .   | .             | .        | .     | .    | .   | .                        |                         |
| 0 | 0 | .            | NA | .   | .             | .        | KEC.  | .    | .   | REACTOME_MEIOSIS;REACTO  |                         |
| 0 | 0 | Synpolydac   | NA | .   | PRO           | STRU     | .     | .    | .   | .                        |                         |
| 0 | 0 | Spinoceret   | NA | .   | SYS           | CYT      | (     | .    | .   | .                        |                         |
| 0 | 0 | .            | NA | .   | EST MEM       | .        | .     | .    | .   | .                        |                         |
| 0 | 0 | .            | NA | .   | SYS           | INTR     | .     | .    | .   | .                        |                         |
| 0 | 0 | .            | NA | .   | .             | .        | .     | .    | .   | .                        |                         |
| 0 | 0 | .            | NA | .   | CELI          | NUCL     | .     | .    | .   | .                        |                         |
| 0 | 0 | .            | NA | .   | CELI          | NUCL     | .     | .    | .   | .                        |                         |
| 0 | 0 | .            | NA | .   | .             | .        | .     | .    | .   | REACTOME_NEURONAL_SYST   |                         |
| 0 | 0 | .            | NA | .   | .             | .        | .     | .    | .   | REACTOME_NEURONAL_SYST   |                         |
| 0 | 0 | .            | NA | .   | .             | .        | KEC.  | .    | .   | .                        |                         |
| 0 | 0 | .            | NA | .   | .             | .        | .     | .    | .   | .                        |                         |
| 0 | 0 | .            | NA | .   | ENZ           | CYT      | (KINA | KEC. | .   | .                        |                         |
| 0 | 0 | .            | NA | .   | BIO           | .        | KEC.  | .    | .   | .                        |                         |
| 0 | 0 | .            | NA | .   | .             | INTR     | KEC.  | .    | .   | .                        |                         |
| 0 | 0 | Chondrody    | NA | .   | SYS           | ARYL     | .     | .    | .   | REACTOME_PTM_GAMMA_CAF   |                         |
| 0 | 0 | .            | NA | .   | .             | .        | KEC.  | .    | .   | .                        |                         |
| 0 | 0 | .            | NA | .   | .             | .        | .     | .    | .   | .                        |                         |
| 0 | 0 | .            | NA | .   | .             | .        | .     | .    | .   | .                        |                         |
| 0 | 0 | .            | NA | .   | CELI          | EXTI     | INTE  | (    | .   | .                        |                         |
| 0 | 0 | Cataract 4   | (  | NA  | .             | .        | .     | .    | .   | .                        |                         |
| 0 | 0 | .            | NA | .   | .             | .        | .     | .    | .   | .                        |                         |
| 0 | 0 | .            | NA | .   | .             | .        | .     | .    | .   | .                        |                         |
| 0 | 0 | Epileptic er | NA | .   | .             | .        | .     | .    | .   | .                        |                         |
| 0 | 0 | .            | NA | .   | .             | .        | .     | .    | .   | .                        |                         |
| 0 | 0 | .            | NA | .   | .             | .        | .     | .    | .   | .                        |                         |
| 0 | 0 | Mental ret   | NA | .   | BEH           | .        | .     | .    | .   | .                        |                         |
| 0 | 0 | .            | NA | .   | .             | .        | .     | .    | .   | .                        |                         |
| 0 | 0 | Glycerol ki  | NA | .   | .             | .        | KEC.  | .    | .   | REACTOME_TRIGLYCERIDE_B  |                         |
| 0 | 0 | Glycerol ki  | NA | .   | .             | .        | KEC.  | .    | .   | REACTOME_TRIGLYCERIDE_B  |                         |
| 0 | 0 | Becker mu    | NA | .   | BIO           | PRO      | ACTII | KEC. | BIO | (                        | REACTOME_STRIATED_MUSCI |
| 0 | 0 | .            | NA | .   | .             | .        | .     | .    | .   | .                        |                         |
| 0 | 0 | .            | NA | .   | CELI          | .        | .     | .    | .   | .                        |                         |

|   |    |             |    |   |                |                   |                         |                          |   |
|---|----|-------------|----|---|----------------|-------------------|-------------------------|--------------------------|---|
| 0 | 0. | NA          | .  | . | .              | .                 | .                       | .                        | . |
| 0 | 0. | NA          | .  | . | .              | .                 | .                       | .                        | . |
| 0 | 0. | NA          | .  | . | .              | .                 | .                       | .                        | . |
| 0 | 0. | NA          | .  | . | .              | .                 | .                       | .                        | . |
| 0 | 0  | Renpennin   | NA | . | RNA NUC TRAN   | KEC.              | .                       | .                        | . |
| 0 | 0. | NA          | .  | . | .              | KEC.              | .                       | REACTOME_NEGATIVE_REGUI  | . |
| 0 | 0  | Neurodege   | NA | . | .              | .                 | .                       | .                        | . |
| 0 | 0. | NA          | .  | . | .              | .                 | .                       | .                        | . |
| 0 | 0. | NA          | .  | . | .              | .                 | .                       | .                        | . |
| 0 | 0  | Aland Islar | NA | . | DET INTRCATI   | (KEC.             | .                       | .                        | . |
| 0 | 0. | NA          | .  | . | SIG NONKINA    | .                 | .                       | .                        | . |
| 0 | 0. | NA          | .  | . | CELI MAC.      | KEC PID.          | .                       | REACTOME_SIGNALLING_BY_I | . |
| 0 | 0. | NA          | .  | . | .              | .                 | .                       | .                        | . |
| 0 | 0  | Mental retæ | NA | . | .              | .                 | .                       | .                        | . |
| 0 | 0  | Mental retæ | NA | . | .              | KEC.              | .                       | .                        | . |
| 0 | 0. | NA          | .  | . | DNA ORG PRO    | KEC PID.          | .                       | REACTOME_MEIOSIS;REACTO  | . |
| 0 | 0  | Mental retæ | NA | . | PRO NUC ACID   | KEC PID.          | .                       | REACTOME_IMMUNE_SYSTEM   | . |
| 0 | 0. | NA          | .  | . | .              | .                 | .                       | .                        | . |
| 0 | 0  | Aarskog-Si  | NA | . | REG CYT(GTP    | KEC PID.          | .                       | REACTOME_SIGNALING_BY_RI | . |
| 0 | 0. | NA          | .  | . | .              | .                 | .                       | .                        | . |
| 0 | 0. | NA          | .  | . | .              | .                 | .                       | .                        | . |
| 0 | 0. | NA          | .  | . | .              | .                 | .                       | .                        | . |
| 0 | 0. | NA          | .  | . | .              | .                 | .                       | .                        | . |
| 0 | 0. | NA          | .  | . | .              | .                 | .                       | .                        | . |
| 0 | 0. | NA          | .  | . | .              | .                 | .                       | .                        | . |
| 0 | 0. | NA          | .  | . | .              | .                 | .                       | .                        | . |
| 0 | 0. | NA          | .  | . | .              | .                 | .                       | .                        | . |
| 0 | 0. | NA          | .  | . | .              | .                 | .                       | .                        | . |
| 0 | 0. | NA          | .  | . | .              | .                 | .                       | .                        | . |
| 0 | 0. | NA          | .  | . | .              | .                 | .                       | .                        | . |
| 0 | 0. | NA          | .  | . | .              | .                 | .                       | REACTOME_SIGNALING_BY_RI | . |
| 0 | 0. | NA          | .  | . | .              | .                 | .                       | .                        | . |
| 0 | 0. | NA          | .  | . | SIG CYT(       | PID.              | .                       | .                        | . |
| 0 | 0  | Lujan-Fryn  | NA | . | RNA NUC RNA_   | PID.              | .                       | REACTOME_DEVELOPMENTAL   | . |
| 0 | 0  | Charcot-Mi  | NA | . | CM9 SYS` CELI. | .                 | .                       | REACTOME_MEMBRANE_TRAF   | . |
| 0 | 0. | NA          | .  | . | .              | .                 | .                       | .                        | . |
| 0 | 0. | NA          | .  | . | .              | .                 | .                       | .                        | . |
| 0 | 0  | Cornelia de | NA | . | RNA NUC HYDF.  | PID BIO(          | REACTOME_NOTCH1_INTRACI | .                        | . |
| 0 | 0  | Muscle gly  | NA | . | GEN. PHO       | KEC.              | .                       | REACTOME_GLYCOGEN_BREA   | . |
| 0 | 0. | NA          | .  | . | .              | PID.              | .                       | .                        | . |
| 0 | 0. | NA          | .  | . | .              | .                 | .                       | .                        | . |
| 0 | 0. | NA          | .  | . | .              | .                 | .                       | .                        | . |
| 0 | 0  | ?Mental re  | NA | . | .              | .                 | .                       | .                        | . |
| 0 | 0. | NA          | .  | . | .              | .                 | .                       | .                        | . |
| 0 | 0  | Mental retæ | NA | . | .              | .                 | .                       | .                        | . |
| 0 | 0. | NA          | .  | . | INTR.          | .                 | .                       | .                        | . |
| 0 | 0. | NA          | .  | . | INTR.          | .                 | .                       | .                        | . |
| 0 | 0. | NA          | .  | . | INTR.          | .                 | .                       | .                        | . |
| 0 | 0. | NA          | .  | . | INTR.          | .                 | .                       | .                        | . |
| 0 | 0. | NA          | .  | . | .              | .                 | .                       | .                        | . |
| 0 | 0. | NA          | .  | . | EST).          | VOLT KEC PID BIO( | .                       | .                        | . |
| 0 | 0. | NA          | .  | . | EST CYT(RNA_   | .                 | .                       | .                        | . |





|   |    |              |    |                |       |           |                         |                         |                         |
|---|----|--------------|----|----------------|-------|-----------|-------------------------|-------------------------|-------------------------|
| 0 | 0. | NA           | .  | .              | .     | .         | .                       | .                       | .                       |
| 0 | 0. | NA           | .  | EST/COA.       | KEC   | PID       | BIO                     | .                       | .                       |
| 0 | 0. | NA           | .  | .              | .     | .         | .                       | .                       | .                       |
| 0 | 0. | NA           | .  | .              | TRAN. | PID.      | .                       | .                       | .                       |
| 0 | 0. | NA           | .  | .              | .     | .         | .                       | .                       | .                       |
| 0 | 0. | NA           | .  | EST/ORG.       | .     | .         | .                       | .                       | .                       |
| 0 | 0. | NA           | .  | .              | .     | KEC.      | .                       | .                       | .                       |
| 0 | 0. | NA           | .  | .              | .     | .         | .                       | .                       | .                       |
| 0 | 0. | NA           | .  | .              | .     | .         | .                       | .                       | .                       |
| 0 | 0. | NA           | .  | .              | .     | .         | .                       | .                       | .                       |
| 0 | 0  | Urofacial s  | NA | .              | HYDF  | KEC.      | .                       | REACTOME_HS_GAG_DEGRAI  |                         |
| 0 | 0. | NA           | .  | EST/ORG.       | .     | PID.      | .                       | REACTOME_CELL_CYCLE;REA |                         |
| 0 | 0. | NA           | .  | EXTICARE       | KEC.  | .         | .                       | .                       | .                       |
| 0 | 0. | NA           | .  | .              | .     | .         | .                       | .                       | .                       |
| 0 | 0. | NA           | .  | DNA CYT        | .     | .         | .                       | .                       | .                       |
| 0 | 0. | NA           | .  | SYS INTR RECE  | KEC   | PID.      | .                       | REACTOME_ACTIVATED_NOTC |                         |
| 0 | 0. | NA           | .  | .              | .     | .         | .                       | .                       | .                       |
| 0 | 0. | NA           | .  | .              | .     | .         | .                       | .                       | .                       |
| 0 | 0. | NA           | .  | .              | .     | .         | .                       | .                       | .                       |
| 0 | 0. | NA           | .  | .              | .     | .         | .                       | .                       | .                       |
| 0 | 0. | NA           | .  | MICF ORG MICR. | PID.  | .         | REACTOME_CELL_CYCLE;REA |                         |                         |
| 0 | 0  | Immunode     | NA | .              | .     | KEC.      | .                       | .                       | .                       |
| 0 | 0. | NA           | .  | DNA NUC PROT.  | .     | .         | .                       | .                       | .                       |
| 0 | 0. | NA           | .  | .              | .     | .         | .                       | .                       | .                       |
| 0 | 0. | NA           | .  | .              | .     | .         | .                       | .                       | .                       |
| 0 | 0. | NA           | .  | .              | .     | .         | .                       | .                       | .                       |
| 0 | 0. | NA           | .  | SIGN INTR      | TRAN. | PID.      | .                       | .                       | .                       |
| 0 | 0. | NA           | .  | .              | .     | .         | .                       | .                       | .                       |
| 0 | 0. | NA           | .  | .              | .     | .         | .                       | .                       | .                       |
| 0 | 0  | Becker mu    | NA | .              | BIO   | PRO ACTII | KEC.                    | BIO                     | REACTOME_STRIATED_MUSCI |
| 0 | 0. | NA           | .  | .              | .     | .         | .                       | .                       | .                       |
| 0 | 0  | Megakaryc    | NA | .              | .     | .         | PID                     | BIO                     | .                       |
| 0 | 0. | NA           | .  | .              | .     | .         | .                       | .                       | .                       |
| 0 | 0. | NA           | .  | MUL PRO INTE   | .     | PID.      | .                       | REACTOME_EXTRACELLULAR  |                         |
| 0 | 0  | {Bardet-Bie  | NA | .              | .     | .         | .                       | .                       | .                       |
| 0 | 0. | NA           | .  | CEN            | ORG.  | .         | .                       | .                       | .                       |
| 0 | 0. | NA           | .  | .              | .     | .         | .                       | .                       | .                       |
| 0 | 0. | NA           | .  | .              | .     | .         | .                       | .                       | .                       |
| 0 | 0. | NA           | .  | .              | .     | .         | .                       | .                       | .                       |
| 0 | 0. | NA           | .  | .              | .     | .         | .                       | .                       | .                       |
| 0 | 0  | Elliptocytos | NA | .              | ACTI  | ORGACTII. | .                       | REACTOME_DEVELOPMENTAL  |                         |
| 0 | 0  | [Blood gro   | NA | .              | MEM.  | .         | .                       | REACTOME_SIGNALING_BY_G |                         |
| 0 | 0. | NA           | .  | .              | .     | .         | .                       | .                       | .                       |
| 0 | 0. | NA           | .  | .              | .     | .         | .                       | .                       | .                       |
| 0 | 0. | NA           | .  | .              | .     | .         | .                       | .                       | .                       |
| 0 | 0  | Nephropatl   | NA | .              | .     | .         | .                       | .                       | .                       |
| 0 | 0. | NA           | .  | .              | .     | KEC       | PID.                    | REACTOME_SIGNALING_BY_G |                         |
| 0 | 0. | NA           | .  | PRO.           | PRO   | .         | .                       | .                       | .                       |
| 0 | 0  | Homocystii   | NA | .              | .     | .         | KEC.                    | REACTOME_SULFUR_AMINO_  |                         |
| 0 | 0. | NA           | .  | .              | .     | .         | KEC.                    | .                       | .                       |
| 0 | 0. | NA           | .  | .              | .     | .         | KEC.                    | .                       | .                       |

|   |   |              |                  |                             |                                      |
|---|---|--------------|------------------|-----------------------------|--------------------------------------|
| 0 | 0 | Sitosterole  | NA . . . . .     | PRO1KEC . . . . .           | REACTOME_ABCA_TRANSPOR               |
| 0 | 0 | .            | NA . . . . .     | .                           | .                                    |
| 0 | 0 | .            | NA . . . . .     | .                           | .                                    |
| 0 | 0 | .            | NA . . . . .     | .                           | REACTOME_TRANSMEMBRANI               |
| 0 | 0 | Leukodystr   | NA . . . . .     | CELIORGCHAFKECPID . . . . . | REACTOME_MITOCHONDRIAL_              |
| 0 | 0 | .            | NA . . . . .     | RNA . . . . .               | CATIC . . . . .                      |
| 0 | 0 | .            | NA . . . . .     | .                           | CYTLIPID . . . . .                   |
| 0 | 0 | .            | NA . . . . .     | .                           | .                                    |
| 0 | 0 | .            | NA . . . . .     | SIGN . . . . .              | IDEN . . . . .                       |
| 0 | 0 | .            | NA . . . . .     | RNA NUC SPEC . . . . .      | .                                    |
| 0 | 0 | .            | NA . . . . .     | .                           | .                                    |
| 0 | 0 | Seckel syn   | NA . . . . .     | ORG . . . . .               | REACTOME_CELL_CYCLE;REA              |
| 0 | 0 | Seckel syn   | NA . . . . .     | ORG . . . . .               | REACTOME_CELL_CYCLE;REA              |
| 0 | 0 | .            | NA . . . . .     | .                           | .                                    |
| 0 | 0 | .            | NA . . . . .     | ORG . . . . .               | .                                    |
| 0 | 0 | .            | NA . . . . .     | POS INTR . . . . .          | KECPID BIO( REACTOME_EXTRINSIC_PATH' |
| 0 | 0 | Breast can   | NA CM1 . . . . . | PHO\$KECPID BIO(            | REACTOME_SIGNALLING_BY_I'            |
| 0 | 0 | .            | NA . . . . .     | .                           | .                                    |
| 0 | 0 | .            | NA . . . . .     | .                           | .                                    |
| 0 | 0 | Adermatog    | NA . . . . .     | DNA . . . . .               | .                                    |
| 0 | 0 | Spastic pai  | NA . . . . .     | .                           | KEC . . . . .                        |
| 0 | 0 | .            | NA . . . . .     | RNA NUC TRAN . . . . .      | .                                    |
| 0 | 0 | .            | NA . . . . .     | SIGN . . . . .              | PHO\$KEC . . . . .                   |
| 0 | 0 | .            | NA . . . . .     | .                           | .                                    |
| 0 | 0 | Albinism, c  | NA . . . . .     | .                           | .                                    |
| 0 | 0 | .            | NA . . . . .     | .                           | .                                    |
| 0 | 0 | .            | NA . . . . .     | REG INTR PEPT KECPID BIO(   | REACTOME_GASTRIN_CREB_5              |
| 0 | 0 | .            | NA . . . . .     | .                           | .                                    |
| 0 | 0 | .            | NA . . . . .     | .                           | .                                    |
| 0 | 0 | {Breast car  | NA . . . . .     | .                           | KEC . . . . .                        |
| 0 | 0 | .            | NA . . . . .     | SIGN . . . . .              | .                                    |
| 0 | 0 | .            | NA . . . . .     | .                           | .                                    |
| 0 | 0 | .            | NA . . . . .     | .                           | .                                    |
| 0 | 0 | .            | NA . . . . .     | INTR RECE . . . . .         | .                                    |
| 0 | 0 | {Hypersens   | NA . . . . .     | .                           | KECPID BIO(                          |
| 0 | 0 | .            | NA . . . . .     | .                           | REACTOME_NEF_MEDIATED_I              |
| 0 | 0 | .            | NA . . . . .     | .                           | .                                    |
| 0 | 0 | Retinitis pi | NA . . . . .     | .                           | .                                    |
| 0 | 0 | Retinitis pi | NA . . . . .     | .                           | .                                    |
| 0 | 0 | .            | NA . . . . .     | .                           | .                                    |
| 0 | 0 | .            | NA . . . . .     | M_PI ORG . . . . .          | .                                    |
| 0 | 0 | .            | NA . . . . .     | .                           | .                                    |
| 0 | 0 | .            | NA . . . . .     | .                           | .                                    |
| 0 | 0 | .            | NA . . . . .     | .                           | .                                    |
| 0 | 0 | .            | NA . . . . .     | .                           | .                                    |
| 0 | 0 | .            | NA . . . . .     | .                           | KEC . . . . .                        |
| 0 | 0 | .            | NA . . . . .     | EST/ CYT( KINA: . . . . .   | PID . . . . .                        |
| 0 | 0 | .            | NA . . . . .     | SIGN . . . . .              | RAS_ . . . . .                       |
| 0 | 0 | .            | NA . . . . .     | SYS' PRO . . . . .          | PID . . . . .                        |
| 0 | 0 | .            | NA . . . . .     | .                           | .                                    |
| 0 | 0 | Epidermoly   | NA . . . . .     | STRU . . . . .              | REACTOME_APOPTOTIC_CLEA'             |
| 0 | 0 | .            | NA . . . . .     | .                           | .                                    |
| 0 | 0 | .            | NA . . . . .     | .                           | .                                    |
| 0 | 0 | .            | NA . . . . .     | NUC . . . . .               | .                                    |
| 0 | 0 | .            | NA . . . . .     | .                           | .                                    |

|   |    |             |    |       |       |          |      |                          |                           |                           |
|---|----|-------------|----|-------|-------|----------|------|--------------------------|---------------------------|---------------------------|
| 0 | 0. | NA          | .  | .     | .     | .        | .    | .                        | .                         |                           |
| 0 | 0. | NA          | .  | .     | .     | .        | .    | .                        | .                         |                           |
| 0 | 0. | NA          | .  | .     | PHOS  | KEC.     | BIO  | (REACTOME_GLYCOLYSIS;REA |                           |                           |
| 0 | 0. | NA          | .  | .     | .     | .        | .    | .                        | .                         |                           |
| 0 | 0. | NA          | .  | .     | .     | .        | .    | .                        | .                         |                           |
| 0 | 0. | NA          | .  | .     | .     | .        | .    | .                        | .                         |                           |
| 0 | 0. | NA          | .  | .     | .     | .        | .    | .                        | .                         |                           |
| 0 | 0. | NA          | .  | REG.  | .     | .        | .    | .                        | .                         |                           |
| 0 | 0. | NA          | .  | .     | .     | .        | .    | .                        | .                         |                           |
| 0 | 0. | NA          | .  | .     | .     | .        | .    | .                        | .                         |                           |
| 0 | 0. | NA          | .  | BIOF. | NUCL. | PID.     | .    | .                        | .                         |                           |
| 0 | 0. | NA          | .  | .     | .     | .        | .    | .                        | .                         |                           |
| 0 | 0. | NA          | .  | .     | .     | .        | .    | .                        | .                         |                           |
| 0 | 0. | NA          | .  | DNA   | NUC.  | .        | .    | .                        | .                         |                           |
| 0 | 0. | NA          | .  | .     | .     | .        | .    | .                        | .                         |                           |
| 0 | 0. | NA          | .  | .     | RNA_. | .        | .    | .                        | .                         |                           |
| 0 | 0  | Deafness,   | NA | .     | .     | .        | .    | .                        | .                         |                           |
| 0 | 0. | NA          | .  | .     | .     | .        | .    | .                        | .                         |                           |
| 0 | 0  | Spermatog   | NA | .     | SYS   | CELIOXID | KEC. | BIO                      | (REACTOME_LATENT_INFECTIC |                           |
| 0 | 0. | NA          | .  | .     | .     | .        | .    | .                        | .                         |                           |
| 0 | 0. | NA          | .  | .     | .     | .        | .    | .                        | .                         |                           |
| 0 | 0  | Fraser syn  | NA | .     | .     | .        | .    | .                        | .                         |                           |
| 0 | 0  | Fraser syn  | NA | .     | .     | .        | .    | .                        | .                         |                           |
| 0 | 0. | NA          | .  | .     | .     | .        | .    | .                        | .                         |                           |
| 0 | 0. | NA          | .  | .     | .     | .        | .    | .                        | .                         |                           |
| 0 | 0. | NA          | .  | .     | .     | .        | .    | .                        | .                         |                           |
| 0 | 0. | NA          | .  | .     | .     | .        | .    | .                        | .                         |                           |
| 0 | 0. | NA          | .  | .     | .     | .        | .    | .                        | .                         |                           |
| 0 | 0. | NA          | .  | .     | .     | .        | .    | .                        | .                         |                           |
| 0 | 0. | NA          | .  | .     | .     | .        | .    | .                        | .                         |                           |
| 0 | 0. | NA          | .  | .     | .     | .        | .    | .                        | .                         |                           |
| 0 | 0  | Breast can  | NA | .     | REG   | MEM/PHOS | KEC  | PID                      | BIO                       | (REACTOME_SIGNALLING_BY_I |
| 0 | 0. | NA          | .  | .     | .     | .        | .    | .                        | .                         |                           |
| 0 | 0. | NA          | .  | .     | .     | .        | .    | .                        | .                         |                           |
| 0 | 0. | NA          | .  | .     | .     | .        | .    | .                        | .                         |                           |
| 0 | 0. | NA          | .  | .     | .     | .        | .    | .                        | .                         |                           |
| 0 | 0. | NA          | .  | .     | .     | .        | .    | .                        | .                         |                           |
| 0 | 0. | NA          | .  | .     | .     | .        | .    | .                        | .                         |                           |
| 0 | 0. | NA          | .  | .     | .     | .        | .    | .                        | .                         |                           |
| 0 | 0. | NA          | .  | .     | .     | .        | .    | .                        | .                         |                           |
| 0 | 0. | NA          | .  | .     | .     | .        | .    | .                        | .                         |                           |
| 0 | 0. | NA          | .  | .     | .     | .        | .    | .                        | .                         |                           |
| 0 | 0. | NA          | .  | .     | .     | .        | .    | .                        | .                         |                           |
| 0 | 0. | NA          | .  | .     | .     | .        | .    | .                        | .                         |                           |
| 0 | 0. | NA          | .  | .     | .     | .        | .    | .                        | .                         |                           |
| 0 | 0  | Night blind | NA | .     | .     | .        | .    | .                        | .                         |                           |
| 0 | 0. | NA          | .  | .     | .     | .        | .    | .                        | .                         |                           |
| 0 | 0. | NA          | .  | .     | .     | .        | .    | .                        | .                         |                           |
| 0 | 0. | NA          | .  | .     | INTR. | .        | .    | .                        | .                         |                           |
| 0 | 0. | NA          | .  | .     | .     | .        | .    | .                        | .                         |                           |

|   |    |              |    |         |       |        |       |                         |                          |
|---|----|--------------|----|---------|-------|--------|-------|-------------------------|--------------------------|
| 0 | 0. | NA           | .  | .       | .     | .      | .     | .                       | .                        |
| 0 | 0. | NA           | .  | .       | .     | .      | .     | .                       | .                        |
| 0 | 0. | NA           | .  | .       | .     | .      | .     | .                       | .                        |
| 0 | 0. | NA           | .  | .       | .     | .      | .     | .                       | .                        |
| 0 | 0. | NA           | .  | RNA     | ORG.  | KEC.   | .     | REACTOME_MRNA_DECAY_BY  |                          |
| 0 | 0. | NA           | .  | .       | .     | .      | .     | REACTOME_PROCESSING_OF  |                          |
| 0 | 0. | NA           | .  | .       | ORG.  | .      | .     | REACTOME_GENERIC_TRANSI |                          |
| 0 | 0. | NA           | .  | .       | .     | .      | .     | .                       |                          |
| 0 | 0. | NA           | .  | .       | .     | .      | .     | .                       |                          |
| 0 | 0. | NA           | .  | .       | .     | .      | .     | .                       |                          |
| 0 | 0. | NA           | .  | .       | .     | .      | .     | .                       |                          |
| 0 | 0. | NA           | .  | .       | .     | .      | .     | .                       |                          |
| 0 | 0  | Spinocereb   | NA | .       | .     | .      | .     | .                       |                          |
| 0 | 0. | NA           | .  | .       | .     | KEC.   | .     | REACTOME_PHOSPHOLIPID_M |                          |
| 0 | 0. | NA           | .  | .       | .     | .      | .     | .                       |                          |
| 0 | 0. | NA           | .  | REG.    | TRAN  | KEC    | PID.  | .                       |                          |
| 0 | 0. | NA           | .  | .       | .     | .      | .     | .                       |                          |
| 0 | 0. | NA           | .  | BIOF.   | .     | .      | .     | .                       |                          |
| 0 | 0. | NA           | .  | MUL.    | .     | .      | .     | .                       |                          |
| 0 | 0. | NA           | .  | .       | .     | .      | .     | .                       |                          |
| 0 | 0. | NA           | .  | .       | .     | .      | .     | .                       |                          |
| 0 | 0. | NA           | .  | .       | .     | ARYL.  | .     | REACTOME_PTM_GAMMA_CAF  |                          |
| 0 | 0  | Epileptic er | NA | .       | .     | .      | .     | .                       |                          |
| 0 | 0. | NA           | .  | .       | .     | .      | .     | .                       |                          |
| 0 | 0. | NA           | .  | EST/ORG | MICR. | .      | .     | REACTOME_DEVELOPMENTAL  |                          |
| 0 | 0. | NA           | .  | .       | .     | .      | .     | .                       |                          |
| 0 | 0. | NA           | .  | .       | .     | .      | .     | .                       |                          |
| 0 | 0. | NA           | .  | SIGN    | INTR  | NEUF   | KEC.  | BIO                     | REACTOME_TRANSMISSION_A  |
| 0 | 0. | NA           | .  | PRO.    | KINA  | KEC    | PID   | BIO                     | REACTOME_SIGNALLING_BY_I |
| 0 | 0. | NA           | .  | .       | .     | .      | .     | .                       |                          |
| 0 | 0. | NA           | .  | .       | .     | .      | .     | .                       |                          |
| 0 | 0. | NA           | .  | .       | .     | .      | .     | .                       |                          |
| 0 | 0. | NA           | .  | .       | .     | .      | .     | .                       |                          |
| 0 | 0. | NA           | .  | .       | .     | .      | PID.  | REACTOME_EXTRACELLULAR  |                          |
| 0 | 0. | NA           | .  | .       | .     | .      | .     | REACTOME_CROSS_PRESENT  |                          |
| 0 | 0. | NA           | .  | .       | .     | .      | .     | .                       |                          |
| 0 | 0. | NA           | .  | .       | ORG   | ACTII. | PID.  | REACTOME_DEVELOPMENTAL  |                          |
| 0 | 0. | NA           | .  | .       | .     | .      | .     | .                       |                          |
| 0 | 0. | NA           | .  | .       | .     | .      | .     | .                       |                          |
| 0 | 0  | Holoproser   | NA | .       | DNA.  | CATI   | KEC   | PID                     | BIO                      |
| 0 | 0. | NA           | .  | .       | .     | .      | .     | .                       |                          |
| 0 | 0. | NA           | .  | .       | .     | .      | PID.  | .                       |                          |
| 0 | 0. | NA           | .  | .       | .     | .      | .     | REACTOME_DIABETES_PATHV |                          |
| 0 | 0. | NA           | .  | .       | .     | .      | .     | .                       |                          |
| 0 | 0. | NA           | .  | .       | .     | .      | .     | .                       |                          |
| 0 | 0. | NA           | .  | .       | .     | .      | .     | .                       |                          |
| 0 | 0  | {Essential t | NA | .       | SIGN  | INTR   | AMIN  | KEC.                    | REACTOME_SIGNALING_BY_G  |
| 0 | 0  | Cone-rod c   | NA | .       | .     | .      | HYDF. | .                       |                          |
| 0 | 0. | NA           | .  | .       | .     | .      | .     | .                       |                          |
| 0 | 0. | NA           | .  | .       | .     | .      | .     | .                       |                          |
| 0 | 0. | NA           | .  | .       | .     | .      | .     | .                       |                          |
| 0 | 0. | NA           | .  | .       | EXTI. | .      | .     | .                       |                          |

|   |               |    |   |          |        |       |      |                         |                          |
|---|---------------|----|---|----------|--------|-------|------|-------------------------|--------------------------|
| 0 | 0.            | NA | . | .        | .      | .     | .    | .                       | .                        |
| 0 | 0.            | NA | . | SYS      | INTR.  | .     | .    | .                       | .                        |
| 0 | 0.            | NA | . | .        | .      | KEC   | PID. | REACTOME_RNA_POL_I_TRAN |                          |
| 0 | 0.            | NA | . | .        | .      | .     | .    | .                       | .                        |
| 0 | 0.            | NA | . | .        | .      | .     | .    | .                       | .                        |
| 0 | 0.            | NA | . | .        | .      | .     | .    | REACTOME_DEVELOPMENTAL  |                          |
| 0 | 0.            | NA | . | .        | .      | .     | .    | .                       | .                        |
| 0 | 0 {Colchicine | NA | . | EST/CELI | NUCL   | KEC   | PID. | BIO(                    | REACTOME_ABACAVIR_TRANS  |
| 0 | 0.            | NA | . | .        | .      | .     | .    | .                       | .                        |
| 0 | 0 Thyroid ca  | NA | . | ORG.     | .      | .     | .    | REACTOME_CELL_CYCLE;REA |                          |
| 0 | 0.            | NA | . | SIGNON   | PROT   | KEC   | PID. | BIO(                    | REACTOME_APOPTOTIC_CLEA  |
| 0 | 0.            | NA | . | POS.     | .      | KEC   | PID. | BIO(                    | REACTOME_EXTRINSIC_PATH' |
| 0 | 0.            | NA | . | .        | .      | .     | .    | .                       | .                        |
| 0 | 0.            | NA | . | INTR.    | .      | KEC   | PID. | REACTOME_INTEGRIN_CELL_ |                          |
| 0 | 0.            | NA | . | .        | .      | .     | .    | .                       | .                        |
| 0 | 0.            | NA | . | .        | .      | .     | .    | .                       | .                        |
| 0 | 0.            | NA | . | .        | .      | .     | .    | .                       | .                        |
| 0 | 0.            | NA | . | ORG      | STRL.  | .     | .    | .                       | .                        |
| 0 | 0 Antley-Bixl | NA | . | CELI.    | .      | KEC   | PID. | REACTOME_NEGATIVE_REGUI |                          |
| 0 | 0.            | NA | . | RNA      | NUC.   | .     | .    | .                       | .                        |
| 0 | 0 Deafness,   | NA | . | REG      | CYT(.  | .     | .    | BIO(.                   |                          |
| 0 | 0 Deafness,   | NA | . | REG      | CYT(.  | .     | .    | BIO(.                   |                          |
| 0 | 0 Leukemia,   | NA | . | .        | .      | KEC   | PID. | BIO(                    | REACTOME_SIGNALING_BY_RI |
| 0 | 0 {Diabetes r | NA | . | NUC      | CYT(.  | .     | .    | REACTOME_INTERFERON_GAI |                          |
| 0 | 0 Bladder ca  | NA | . | REG      | NUC    | KINA: | KEC  | PID.                    | BIO(                     |
| 0 | 0.            | NA | . | .        | .      | .     | .    | .                       | .                        |
| 0 | 0.            | NA | . | .        | .      | .     | .    | .                       | .                        |
| 0 | 0.            | NA | . | .        | .      | .     | .    | .                       | .                        |
| 0 | 0.            | NA | . | .        | .      | .     | .    | .                       | .                        |
| 0 | 0.            | NA | . | .        | .      | .     | .    | .                       | .                        |
| 0 | 0.            | NA | . | PRO      | VESI.  | KEC.  | .    | REACTOME_DIABETES_PATHV |                          |
| 0 | 0.            | NA | . | .        | .      | .     | .    | .                       | .                        |
| 0 | 0.            | NA | . | .        | .      | .     | .    | .                       | .                        |
| 0 | 0.            | NA | . | .        | .      | .     | .    | .                       | .                        |
| 0 | 0.            | NA | . | .        | .      | .     | .    | .                       | .                        |
| 0 | 0.            | NA | . | .        | .      | .     | .    | .                       | .                        |
| 0 | 0 Spinoceret  | NA | . | .        | .      | .     | .    | .                       | .                        |
| 0 | 0.            | NA | . | INTR     | CATI(. | .     | .    | REACTOME_TRANSMEMBRANI  |                          |
| 0 | 0.            | NA | . | .        | .      | .     | .    | .                       | .                        |
| 0 | 0.            | NA | . | .        | .      | .     | .    | .                       | .                        |
| 0 | 0.            | NA | . | .        | .      | .     | .    | .                       | .                        |
| 0 | 0.            | NA | . | CELI.    | .      | KEC.  | .    | .                       | .                        |
| 0 | 0 Episodic at | NA | . | REG      | INTR   | CATI( | KEC. | .                       | REACTOME_TRANSMISSION_A  |
| 0 | 0.            | NA | . | .        | .      | .     | KEC. | .                       | REACTOME_SIGNALING_BY_G  |
| 0 | 0.            | NA | . | .        | .      | .     | .    | .                       | .                        |
| 0 | 0.            | NA | . | SYS      | PRO.   | .     | .    | .                       | .                        |
| 0 | 0.            | NA | . | EST/INTR | CATI(. | .     | .    | REACTOME_NEURONAL_SYST  |                          |
| 0 | 0.            | NA | . | .        | .      | .     | .    | .                       | .                        |
| 0 | 0.            | NA | . | .        | .      | .     | .    | .                       | .                        |
| 0 | 0.            | NA | . | .        | .      | .     | .    | .                       | .                        |
| 0 | 0.            | NA | . | .        | .      | .     | .    | .                       | .                        |
| 0 | 0.            | NA | . | CEN      | ORG    | KINA: | .    | .                       | REACTOME_CELL_CYCLE;REA  |

|   |    |             |    |               |                      |                          |                          |
|---|----|-------------|----|---------------|----------------------|--------------------------|--------------------------|
| 0 | 0. | NA          | .  | .             | .                    | .                        | REACTOME_TRANSMEMBRANI   |
| 0 | 0. | NA          | .  | BIOINTRPRO1.  | .                    | .                        |                          |
| 0 | 0. | NA          | .  | BIOINTRPRO1.  | .                    | .                        |                          |
| 0 | 0. | NA          | .  | EST/MEM.      | .                    | .                        |                          |
| 0 | 0. | NA          | .  | PRO.          | KINA:KECPID,BIO(     | REACTOME_SIGNALLING_BY_I |                          |
| 0 | 0. | NA          | .  | .             | .                    | .                        |                          |
| 0 | 0. | NA          | .  | .             | .                    | .                        |                          |
| 0 | 0. | NA          | .  | .             | .                    | .                        |                          |
| 0 | 0. | NA          | .  | .             | .                    | .                        |                          |
| 0 | 0. | NA          | .  | .             | .                    | .                        |                          |
| 0 | 0. | NA          | .  | NEG NUC TRAN. | PID.                 | REACTOME_RNA_POL_III_TRA |                          |
| 0 | 0. | NA          | .  | .             | PID.                 | .                        |                          |
| 0 | 0. | NA          | .  | .             | .                    | .                        |                          |
| 0 | 0. | NA          | .  | .             | .                    | .                        |                          |
| 0 | 0. | NA          | .  | .             | IDEN'KECPID,BIO(     | .                        |                          |
| 0 | 0. | NA          | .  | .             | .                    | .                        |                          |
| 0 | 0. | NA          | .  | RNA.          | TRAN.                | PID.                     |                          |
| 0 | 0. | NA          | .  | .             | .                    | .                        |                          |
| 0 | 0. | NA          | .  | EST/.         | .                    | .                        |                          |
| 0 | 0. | NA          | .  | .             | .                    | .                        |                          |
| 0 | 0. | NA          | .  | .             | .                    | .                        |                          |
| 0 | 0. | NA          | .  | .             | KECPID.              | REACTOME_SIGNALING_BY_RI |                          |
| 0 | 0  | Leukoence   | NA | .             | REG CYT(TRAN.        | BIO(                     | REACTOME_TRANSLATION;RE  |
| 0 | 0. | NA          | .  | .             | .                    | .                        |                          |
| 0 | 0. | NA          | .  | .             | .                    | .                        |                          |
| 0 | 0. | NA          | .  | ORGRNA_.      | .                    | .                        |                          |
| 0 | 0. | NA          | .  | .             | .                    | .                        |                          |
| 0 | 0. | NA          | .  | .             | .                    | .                        |                          |
| 0 | 0. | NA          | .  | .             | .                    | .                        |                          |
| 0 | 0. | NA          | .  | .             | .                    | .                        |                          |
| 0 | 0. | NA          | .  | .             | .                    | .                        |                          |
| 0 | 0. | NA          | .  | .             | .                    | .                        |                          |
| 0 | 0. | NA          | .  | .             | .                    | .                        |                          |
| 0 | 0. | NA          | .  | .             | KEC.                 | .                        |                          |
| 0 | 0. | NA          | .  | .             | .                    | .                        |                          |
| 0 | 0. | NA          | .  | .             | .                    | .                        |                          |
| 0 | 0. | NA          | .  | .             | .                    | .                        |                          |
| 0 | 0. | NA          | .  | .             | PID.                 | .                        |                          |
| 0 | 0. | NA          | .  | .             | .                    | .                        |                          |
| 0 | 0. | NA          | .  | .             | .                    | .                        |                          |
| 0 | 0  | {Diabetes r | NA | .             | EST/CYT(KINA:KECPID. | .                        |                          |
| 0 | 0. | NA          | .  | .             | .                    | .                        |                          |
| 0 | 0. | NA          | .  | .             | .                    | .                        |                          |
| 0 | 0. | NA          | .  | .             | .                    | .                        |                          |
| 0 | 0. | NA          | .  | .             | .                    | .                        |                          |
| 0 | 0. | NA          | .  | .             | .                    | .                        |                          |
| 0 | 0. | NA          | .  | .             | .                    | .                        |                          |
| 0 | 0  | Nephronoç   | NA | .             | .                    | .                        | REACTOME_SIGNALING_BY_HI |
| 0 | 0  | Nephronoç   | NA | .             | .                    | .                        | REACTOME_SIGNALING_BY_HI |
| 0 | 0. | NA          | .  | .             | .                    | .                        |                          |
| 0 | 0. | NA          | .  | .             | .                    | .                        |                          |
| 0 | 0. | NA          | .  | .             | .                    | .                        |                          |
| 0 | 0. | NA          | .  | .             | .                    | .                        |                          |

|   |    |            |    |     |              |          |      |      |                          |
|---|----|------------|----|-----|--------------|----------|------|------|--------------------------|
| 0 | 0. | NA         | .  | .   | .            | .        | .    | .    | .                        |
| 0 | 0. | NA         | .  | .   | .            | .        | .    | .    | .                        |
| 0 | 0. | NA         | .  | .   | .            | .        | .    | .    | .                        |
| 0 | 0. | NA         | .  | .   | .            | .        | .    | .    | .                        |
| 0 | 0. | NA         | .  | .   | .            | .        | .    | .    | .                        |
| 0 | 0. | NA         | .  | .   | .            | .        | .    | .    | .                        |
| 0 | 0. | NA         | .  | .   | .            | .        | .    | .    | .                        |
| 0 | 0. | NA         | .  | .   | .            | .        | .    | .    | .                        |
| 0 | 0. | NA         | .  | .   | .            | .        | .    | .    | .                        |
| 0 | 0. | NA         | .  | .   | .            | .        | .    | .    | .                        |
| 0 | 0  | Noonan sy  | NA | CM1 | SIGN         | MEM/GTP_ | PID. |      | REACTOME_SIGNALLING_BY_I |
| 0 | 0. | NA         | .  | .   | .            | .        | .    | .    | .                        |
| 0 | 0. | NA         | .  | .   | CELIMEM/CATI | KEC.     |      |      | .                        |
| 0 | 0. | NA         | .  | .   | .            | .        | .    | .    | .                        |
| 0 | 0. | NA         | .  | .   | .            | .        | .    | .    | .                        |
| 0 | 0. | NA         | .  | .   | .            | .        | .    | .    | .                        |
| 0 | 0. | NA         | .  | .   | INTRCATI     | KEC.     |      |      | REACTOME_TRANSMEMBRANI   |
| 0 | 0. | NA         | .  | .   | .            | .        | .    | .    | .                        |
| 0 | 0. | NA         | .  | .   | ORGRNA_      | KEC.     |      |      | .                        |
| 0 | 0. | NA         | .  | .   | CYT(         | RECE     | KEC. |      | REACTOME_TRANSLATION;RE  |
| 0 | 0. | NA         | .  | .   | EST/         | HYDF.    |      |      | REACTOME_TRANSMEMBRANI   |
| 0 | 0. | NA         | .  | .   | EST/INTRNUCL | KEC.     |      |      | REACTOME_HYALURONAN_ME   |
| 0 | 0. | NA         | .  | .   | .            | .        | .    | .    | REACTOME_TRANSMEMBRANI   |
| 0 | 0. | NA         | .  | .   | .            | .        | .    | .    | .                        |
| 0 | 0  | Sebaceous  | NA | .   | .            | SEQL     | KEC  | PID  | BIO(                     |
| 0 | 0. | NA         | .  | .   | .            | .        | .    | .    | .                        |
| 0 | 0. | NA         | .  | .   | SIGN         |          | KEC  | PID. | REACTOME_VEGF_LIGAND_RE  |
| 0 | 0. | NA         | .  | .   | .            | .        | .    | .    | .                        |
| 0 | 0. | NA         | .  | .   | .            | .        | .    | .    | .                        |
| 0 | 0. | NA         | .  | .   | .            | .        | .    | .    | .                        |
| 0 | 0  | Myelodysp  | NA | .   | .            | .        | KEC. |      | REACTOME_TRIGLYCERIDE_B  |
| 0 | 0. | NA         | .  | .   | .            | .        | .    | .    | .                        |
| 0 | 0. | NA         | .  | .   | .            | .        | KEC. |      | .                        |
| 0 | 0. | NA         | .  | .   | .            | .        | KEC  | PID. | REACTOME_DEVELOPMENTAL   |
| 0 | 0. | NA         | .  | .   | .            | .        | .    | .    | .                        |
| 0 | 0. | NA         | .  | .   | SYS          |          | .    | .    | .                        |
| 0 | 0. | NA         | .  | .   | .            | .        | .    | .    | .                        |
| 0 | 0  | {Asthma, s | NA | .   | DEFI.        | RECE     | KEC. |      | REACTOME_ANTIGEN_PROCE   |
| 0 | 0. | NA         | .  | .   | .            | .        | .    | .    | .                        |
| 0 | 0  | Deafness,  | NA | .   | .            | .        | KEC  | PID. | REACTOME_EXTRACELLULAR   |
| 0 | 0. | NA         | .  | .   | .            | .        | .    | .    | .                        |
| 0 | 0. | NA         | .  | .   | .            | .        | .    | .    | .                        |
| 0 | 0. | NA         | .  | .   | .            | .        | KEC. | BIO( | REACTOME_PHOSPHOLIPID_M  |
| 0 | 0. | NA         | .  | .   | .            | .        | .    | .    | .                        |
| 0 | 0. | NA         | .  | .   | .            | .        | .    | .    | .                        |
| 0 | 0. | NA         | .  | .   | SYS          |          | .    | .    | .                        |
| 0 | 0. | NA         | .  | .   | .            | .        | .    | .    | .                        |
| 0 | 0. | NA         | .  | .   | .            | .        | .    | .    | .                        |
| 0 | 0. | NA         | .  | .   | .            | .        | .    | .    | .                        |
| 0 | 0. | NA         | .  | .   | RNA          | NUC.     |      |      | .                        |
| 0 | 0. | NA         | .  | .   | .            | .        | .    | .    | .                        |
| 0 | 0. | NA         | .  | .   | .            | .        | .    | .    | .                        |
| 0 | 0. | NA         | .  | .   | .            | .        | .    | .    | .                        |
| 0 | 0. | NA         | .  | .   | .            | .        | .    | .    | .                        |

|   |   |             |      |           |         |         |                               |
|---|---|-------------|------|-----------|---------|---------|-------------------------------|
| 0 | 0 | Brachydac   | NA . | SIGN INTR | TRAN .  | PID .   | .                             |
| 0 | 0 | .           | NA . | .         | .       | .       | .                             |
| 0 | 0 | Mental ret  | NA . | OLIG INTR | CATI    | KEC .   | REACTOME_METABOLISM_OF_       |
| 0 | 0 | {AIDS, resi | NA . | REG .     | G_PF    | KEC PID | BIO( REACTOME_SIGNALING_BY_EI |
| 0 | 0 | .           | NA . | .         | .       | .       | .                             |
| 0 | 0 | .           | NA . | .         | .       | .       | .                             |
| 0 | 0 | {Migraine,  | NA . | .         | .       | .       | REACTOME_NEURONAL_SYST        |
| 0 | 0 | .           | NA . | SIGN .    | RECE    | KEC PID | .                             |
| 0 | 0 | .           | NA . | .         | .       | .       | .                             |
| 0 | 0 | .           | NA . | REG EXT   | ICOF    | / .     | .                             |
| 0 | 0 | .           | NA . | .         | .       | .       | .                             |
| 0 | 0 | Diabetes nr | NA . | EST/INTR  | .       | KEC PID | REACTOME_NEURONAL_SYST        |
| 0 | 0 | .           | NA . | NEG .     | .       | .       | .                             |
| 0 | 0 | .           | NA . | .         | .       | KEC .   | REACTOME_ACTIVATED_NOTC       |
| 0 | 0 | .           | NA . | .         | .       | .       | .                             |
| 0 | 0 | .           | NA . | RNA .     | TRAN .  | .       | .                             |
| 0 | 0 | .           | NA . | CELI RIB  | CHYDF . | .       | .                             |
| 0 | 0 | .           | NA . | BIO       | CYT( .  | PID .   | .                             |
| 0 | 0 | .           | NA . | .         | .       | .       | .                             |
| 0 | 0 | .           | NA . | .         | .       | .       | .                             |
| 0 | 0 | Hawkinsint  | NA . | CAR .     | .       | KEC .   | REACTOME_METABOLISM_OF_       |
| 0 | 0 | .           | NA . | .         | .       | .       | .                             |
| 0 | 0 | .           | NA . | .         | .       | .       | .                             |
| 0 | 0 | .           | NA . | .         | .       | .       | .                             |
| 0 | 0 | .           | NA . | .         | CYT( .  | KEC .   | REACTOME_PHOSPHOLIPID_M       |
| 0 | 0 | .           | NA . | .         | .       | .       | .                             |
| 0 | 0 | Fraser syn  | NA . | .         | .       | .       | .                             |
| 0 | 0 | .           | NA . | .         | .       | PID .   | .                             |
| 0 | 0 | .           | NA . | .         | .       | .       | .                             |
| 0 | 0 | .           | NA . | BIO       | INTR    | PHOS .  | PID .                         |
| 0 | 0 | 0           | NA . | .         | .       | KEC PID | REACTOME_SPHINGOLIPID_DE      |
| 0 | 0 | .           | NA . | .         | .       | .       | .                             |
| 0 | 0 | .           | NA . | .         | .       | .       | .                             |
| 0 | 0 | .           | NA . | .         | CYT(    | PRO     | KEC .                         |
| 0 | 0 | .           | NA . | .         | .       | BIO(    | REACTOME_SIGNALING_BY_W       |
| 0 | 0 | .           | NA . | .         | .       | .       | .                             |
| 0 | 0 | .           | NA . | .         | .       | .       | .                             |
| 0 | 0 | .           | NA . | .         | .       | .       | .                             |
| 0 | 0 | .           | NA . | .         | .       | .       | .                             |
| 0 | 0 | .           | NA . | .         | .       | .       | .                             |
| 0 | 0 | .           | NA . | REG .     | PRO     | 1 .     | .                             |
| 0 | 0 | .           | NA . | .         | .       | .       | .                             |
| 0 | 0 | .           | NA . | .         | .       | .       | .                             |
| 0 | 0 | .           | NA . | EST/INTR  | HYDF    | KEC .   | .                             |
| 0 | 0 | .           | NA . | .         | .       | KEC .   | .                             |
| 0 | 0 | .           | NA . | EST/ .    | PRO     | 1 .     | .                             |
| 0 | 0 | 0           | NA . | GLU       | 1 .     | LYAS    | KEC PID                       |
| 0 | 0 | .           | NA . | .         | .       | BIO(    | REACTOME_RESPONSE_TO_E        |
| 0 | 0 | .           | NA . | .         | .       | .       | .                             |
| 0 | 0 | .           | NA . | .         | .       | .       | .                             |
| 0 | 0 | .           | NA . | .         | .       | .       | .                             |
| 0 | 0 | 0           | NA . | .         | .       | .       | .                             |
| 0 | 0 | .           | NA . | .         | .       | .       | .                             |
| 0 | 0 | .           | NA . | .         | .       | PID .   | .                             |



|   |    |             |    |              |          |        |      |   |                           |   |
|---|----|-------------|----|--------------|----------|--------|------|---|---------------------------|---|
| 0 | 0. | NA          | .  | .            | .        | .      | .    | . | .                         | . |
| 0 | 0. | NA          | .  | .            | .        | .      | .    | . | .                         | . |
| 0 | 0. | NA          | .  | CELI.        | HYDF.    | .      | .    | . | .                         | . |
| 0 | 0  | Weaver sy   | NA | ANA.         | CHRC.    | .      | .    | . | .                         | . |
| 0 | 0  | Mandibulof  | NA | RNA ORG      | HYDF     | KEC.   | .    | . | REACTOME_PROCESSING_OF    | . |
| 0 | 0. | NA          | .  | REG ORG      | NUCL     | KEC.   | .    | . | REACTOME_DIABETES_PATHV   | . |
| 0 | 0. | NA          | .  | INTRCATI     | KEC.     | .      | .    | . | REACTOME_TRANSMISSION_A   | . |
| 0 | 0. | NA          | .  | RNA.         | RNA_.    | .      | .    | . | .                         | . |
| 0 | 0. | NA          | .  | EST/CYT      | .        | .      | .    | . | .                         | . |
| 0 | 0. | NA          | .  | DNA          | CYT(     | PRO1.  | .    | . | .                         | . |
| 0 | 0. | NA          | .  | .            | .        | .      | .    | . | .                         | . |
| 0 | 0. | NA          | .  | .            | .        | .      | .    | . | .                         | . |
| 0 | 0. | NA          | .  | .            | .        | .      | .    | . | .                         | . |
| 0 | 0. | NA          | .  | STEI         | CYT(SULF | KEC.   | .    | . | REACTOME_BIOLOGICAL_OXII  | . |
| 0 | 0. | NA          | .  | INTR.        | .        | .      | .    | . | .                         | . |
| 0 | 0. | NA          | .  | .            | .        | .      | .    | . | .                         | . |
| 0 | 0. | NA          | .  | .            | .        | .      | .    | . | .                         | . |
| 0 | 0. | NA          | .  | EST/INTRCATI | .        | .      | .    | . | .                         | . |
| 0 | 0. | NA          | .  | .            | .        | .      | .    | . | .                         | . |
| 0 | 0. | NA          | .  | .            | .        | .      | .    | . | .                         | . |
| 0 | 0. | NA          | .  | .            | .        | .      | .    | . | .                         | . |
| 0 | 0. | NA          | .  | .            | .        | .      | .    | . | .                         | . |
| 0 | 0. | NA          | .  | DNA          | SYN      | HYDF.  | .    | . | REACTOME_TRANSMISSION_A   | . |
| 0 | 0. | NA          | .  | .            | .        | .      | .    | . | .                         | . |
| 0 | 0. | NA          | .  | .            | .        | .      | .    | . | .                         | . |
| 0 | 0. | NA          | .  | .            | .        | .      | .    | . | .                         | . |
| 0 | 0. | NA          | .  | EST/ORG.     | .        | .      | .    | . | .                         | . |
| 0 | 0. | NA          | .  | .            | .        | .      | .    | . | .                         | . |
| 0 | 0. | NA          | .  | .            | .        | .      | .    | . | .                         | . |
| 0 | 0  | Auriculocoi | NA | REG.         | HYDF     | KEC    | PID. | . | REACTOME_TRANSMISSION_A   | . |
| 0 | 0. | NA          | .  | .            | .        | .      | .    | . | .                         | . |
| 0 | 0. | NA          | .  | .            | .        | .      | .    | . | .                         | . |
| 0 | 0. | NA          | .  | .            | .        | .      | .    | . | .                         | . |
| 0 | 0. | NA          | .  | .            | .        | .      | .    | . | .                         | . |
| 0 | 0. | NA          | .  | .            | .        | .      | .    | . | .                         | . |
| 0 | 0. | NA          | .  | CELI         | CELI     | LIPID. | .    | . | .                         | . |
| 0 | 0. | NA          | .  | .            | .        | .      | .    | . | .                         | . |
| 0 | 0  | Prostate cα | NA | .            | .        | RNA_.  | .    | . | REACTOME_INTERFERON_ALF   | . |
| 0 | 0  | {Macular d  | NA | .            | .        | .      | .    | . | .                         | . |
| 0 | 0. | NA          | .  | MUS          | ORG      | PRO1.  | PID. | . | .                         | . |
| 0 | 0. | NA          | .  | PRO.         | PRO1.    | .      | .    | . | .                         | . |
| 0 | 0. | NA          | .  | .            | .        | CATI(  | KEC. | . | REACTOME_TCA_CYCLE_AND    | . |
| 0 | 0. | NA          | .  | .            | .        | .      | .    | . | .                         | . |
| 0 | 0. | NA          | .  | .            | .        | .      | .    | . | .                         | . |
| 0 | 0. | NA          | .  | .            | .        | .      | KEC. | . | REACTOME_INHIBITION_OF_TI | . |
| 0 | 0. | NA          | .  | .            | .        | .      | .    | . | .                         | . |
| 0 | 0. | NA          | .  | .            | .        | .      | .    | . | .                         | . |
| 0 | 0. | NA          | .  | INTRG_P      | .        | .      | .    | . | .                         | . |
| 0 | 0. | NA          | .  | .            | .        | .      | .    | . | .                         | . |
| 0 | 0. | NA          | .  | .            | .        | .      | .    | . | .                         | . |
| 0 | 0  | Membrano    | NA | CELI         | INTR     | MET/   | KEC. | . | .                         | . |

|   |    |               |    |   |      |      |      |     |                         |
|---|----|---------------|----|---|------|------|------|-----|-------------------------|
| 0 | 0. | NA            | .  | . | .    | .    | .    | .   | .                       |
| 0 | 0. | NA            | .  | . | .    | KEC  | PID  | BIO | REACTOME_SIGNALING_BY_G |
| 0 | 0  | Myelodysp     | NA | . | .    | .    | .    | .   | .                       |
| 0 | 0  | Cornelia de   | NA | . | .    | .    | .    | .   | .                       |
| 0 | 0. | NA            | .  | . | .    | .    | .    | .   | REACTOME_TRANSMEMBRANI  |
| 0 | 0. | NA            | .  | . | .    | .    | .    | .   | .                       |
| 0 | 0. | NA            | .  | . | .    | .    | .    | .   | .                       |
| 0 | 0. | NA            | .  | . | .    | .    | .    | .   | .                       |
| 0 | 0  | Cardiomyo     | NA | . | SYS  | NUC  | .    | .   | .                       |
| 0 | 0  | {H. pylori ir | NA | . | SYS  | INTR | PRO  | KEC | .                       |
| 0 | 0. | NA            | .  | . | .    | .    | PID  | .   | .                       |
| 0 | 0. | NA            | .  | . | .    | .    | .    | .   | .                       |
| 0 | 0. | NA            | .  | . | RNA  | NUC  | .    | .   | .                       |
| 0 | 0. | NA            | .  | . | .    | .    | .    | .   | .                       |
| 0 | 0. | NA            | .  | . | .    | .    | .    | .   | .                       |
| 0 | 0  | Erythrocytc   | NA | . | SYS  | .    | PRO  | KEC | PID                     |
| 0 | 0. | NA            | .  | . | GEN  | CYT  | NUCL | .   | .                       |
| 0 | 0. | NA            | .  | . | INTR | .    | KEC  | .   | REACTOME_HS_GAG_BIOSYN  |
| 0 | 0. | NA            | .  | . | .    | .    | KEC  | .   | .                       |
| 0 | 0. | NA            | .  | . | RNA  | ORG  | .    | .   | .                       |
| 0 | 0. | NA            | .  | . | NUC  | TRAN | .    | .   | .                       |
| 0 | 0. | NA            | .  | . | .    | .    | .    | .   | .                       |
| 0 | 0. | NA            | .  | . | .    | .    | .    | .   | .                       |
| 0 | 0. | NA            | .  | . | .    | .    | .    | .   | .                       |
| 0 | 0. | NA            | .  | . | PRO  | ACID | KEC  | PID | BIO                     |
| 0 | 0. | NA            | .  | . | RNA  | NUC  | RNA  | KEC | .                       |
| 0 | 0. | NA            | .  | . | SYS  | CELI | PRO  | .   | REACTOME_CELL_CELL_COMI |
| 0 | 0. | NA            | .  | . | INTR | .    | .    | .   | .                       |
| 0 | 0. | NA            | .  | . | .    | .    | .    | .   | .                       |
| 0 | 0  | Hypertrigly   | NA | . | .    | OXID | KEC  | .   | REACTOME_TRIGLYCERIDE_B |
| 0 | 0. | NA            | .  | . | .    | .    | .    | .   | .                       |
| 0 | 0. | NA            | .  | . | .    | .    | .    | .   | .                       |
| 0 | 0. | NA            | .  | . | SIG  | INTR | .    | .   | REACTOME_SIGNALING_BY_G |
| 0 | 0. | NA            | .  | . | INTR | .    | .    | .   | REACTOME_HS_GAG_DEGRAI  |
| 0 | 0. | NA            | .  | . | .    | .    | .    | .   | .                       |
| 0 | 0. | NA            | .  | . | .    | .    | .    | .   | .                       |
| 0 | 0  | Prader-Wil    | NA | . | NEG  | .    | .    | PID | .                       |
| 0 | 0. | NA            | .  | . | .    | .    | .    | .   | .                       |
| 0 | 0. | NA            | .  | . | .    | .    | PID  | .   | .                       |
| 0 | 0. | NA            | .  | . | .    | .    | .    | .   | .                       |
| 0 | 0. | NA            | .  | . | INTR | MET  | KEC  | PID | BIO                     |
| 0 | 0. | NA            | .  | . | ORG  | PRO  | .    | .   | .                       |
| 0 | 0. | NA            | .  | . | .    | .    | .    | .   | .                       |
| 0 | 0. | NA            | .  | . | .    | MOT  | KEC  | .   | .                       |
| 0 | 0. | NA            | .  | . | .    | .    | .    | .   | .                       |
| 0 | 0. | NA            | .  | . | .    | .    | .    | .   | .                       |
| 0 | 0. | NA            | .  | . | .    | .    | .    | .   | .                       |
| 0 | 0  | Mannosido     | NA | . | GLY  | HYD  | KEC  | .   | .                       |
| 0 | 0  | Cold-induc    | NA | . | EXT  | RECE | .    | .   | .                       |
| 0 | 0. | NA            | .  | . | .    | .    | .    | .   | .                       |
| 0 | 0. | NA            | .  | . | .    | .    | .    | .   | .                       |
| 0 | 0. | NA            | .  | . | SYS  | NUCL | KEC  | PID | BIO                     |

|   |    |             |    |               |                |       |                             |
|---|----|-------------|----|---------------|----------------|-------|-----------------------------|
| 0 | 0. | NA          | .  | NUC.          | KEC.           | .     | .                           |
| 0 | 0. | NA          | .  | .             | .              | .     | .                           |
| 0 | 0. | NA          | .  | SEN.          | .              | .     | .                           |
| 0 | 0. | NA          | .  | SEN.          | .              | .     | .                           |
| 0 | 0. | NA          | .  | .             | .              | .     | .                           |
| 0 | 0. | NA          | .  | .             | .              | .     | .                           |
| 0 | 0. | NA          | .  | .             | .              | .     | .                           |
| 0 | 0  | Duane-rad   | NA | .             | .              | PID.  | .                           |
| 0 | 0. | NA          | .  | .             | .              | .     | .                           |
| 0 | 0. | NA          | .  | PRO PRO INTE. | .              | .     | .                           |
| 0 | 0. | NA          | .  | .             | .              | .     | .                           |
| 0 | 0. | NA          | .  | .             | .              | .     | .                           |
| 0 | 0. | NA          | .  | .             | KEC            | PID.  | REACTOME_CELL_CELL_COMI     |
| 0 | 0. | NA          | .  | .             | .              | .     | .                           |
| 0 | 0. | NA          | .  | .             | .              | .     | .                           |
| 0 | 0  | Dent disea  | NA | .             | LIPII ORG PHOS | KEC.  | REACTOME_SIGNALING_BY_RI    |
| 0 | 0. | NA          | .  | INTRG_PF.     | .              | .     | .                           |
| 0 | 0. | NA          | .  | .             | .              | .     | .                           |
| 0 | 0  | Hemophilic  | NA | CM0 REG.      | .              | KEC.  | BIO( REACTOME_RESPONSE_TO_E |
| 0 | 0. | NA          | .  | .             | .              | .     | .                           |
| 0 | 0. | NA          | .  | .             | .              | .     | .                           |
| 0 | 0. | NA          | .  | .             | .              | .     | .                           |
| 0 | 0. | NA          | .  | .             | .              | .     | .                           |
| 0 | 0. | NA          | .  | .             | .              | .     | .                           |
| 0 | 0. | NA          | .  | .             | .              | .     | .                           |
| 0 | 0. | NA          | .  | .             | .              | .     | .                           |
| 0 | 0. | NA          | .  | .             | .              | .     | .                           |
| 0 | 0. | NA          | .  | .             | .              | .     | .                           |
| 0 | 0. | NA          | .  | .             | .              | .     | .                           |
| 0 | 0. | NA          | .  | .             | .              | .     | .                           |
| 0 | 0. | NA          | .  | .             | .              | .     | .                           |
| 0 | 0. | NA          | .  | .             | .              | .     | .                           |
| 0 | 0. | NA          | .  | .             | .              | .     | .                           |
| 0 | 0. | NA          | .  | .             | .              | .     | .                           |
| 0 | 0. | NA          | .  | .             | TRAN           | KEC   | PID.                        |
| 0 | 0. | NA          | .  | SIG           | EXTI           | RECE. | .                           |
| 0 | 0. | NA          | .  | .             | .              | .     | .                           |
| 0 | 0. | NA          | .  | .             | .              | .     | .                           |
| 0 | 0. | NA          | .  | .             | .              | .     | .                           |
| 0 | 0. | NA          | .  | .             | .              | .     | .                           |
| 0 | 0. | NA          | .  | .             | .              | .     | .                           |
| 0 | 0  | Deafness,   | NA | .             | REG            | NON.  | .                           |
| 0 | 0  | Albinism, c | NA | .             | .              | .     | .                           |
| 0 | 0  | Pulmonary   | NA | .             | .              | PID.  | .                           |
| 0 | 0. | NA          | .  | MUL           | ORG            | RECE. | .                           |
| 0 | 0. | NA          | .  | .             | .              | .     | .                           |
| 0 | 0. | NA          | .  | .             | .              | .     | .                           |
| 0 | 0. | NA          | .  | .             | .              | .     | .                           |
| 0 | 0. | NA          | .  | .             | .              | .     | .                           |
| 0 | 0. | NA          | .  | .             | .              | .     | .                           |
| 0 | 0. | NA          | .  | .             | .              | .     | .                           |
| 0 | 0. | NA          | .  | .             | .              | .     | .                           |
| 0 | 0. | NA          | .  | GAM           | CYT.           | .     | .                           |
| 0 | 0. | NA          | .  | .             | .              | .     | .                           |
| 0 | 0. | NA          | .  | .             | .              | .     | .                           |



|   |    |              |    |      |          |        |                         |                         |                          |
|---|----|--------------|----|------|----------|--------|-------------------------|-------------------------|--------------------------|
| 0 | 0. | NA           | .  | .    | .        | .      | .                       | .                       | .                        |
| 0 | 0. | NA           | .  | .    | .        | .      | .                       | .                       | .                        |
| 0 | 0. | NA           | .  | .    | .        | .      | .                       | .                       | .                        |
| 0 | 0. | NA           | .  | .    | .        | .      | .                       | .                       | .                        |
| 0 | 0. | NA           | .  | PRO  | ORG.     | .      | .                       | .                       | .                        |
| 0 | 0. | NA           | .  | .    | .        | .      | .                       | .                       | .                        |
| 0 | 0. | NA           | .  | DNA. | DNA.     | .      | .                       | REACTOME_MEIOSIS;       | REACTO                   |
| 0 | 0  | Alagille syr | NA | .    | REG INTR | SPEC   | KEC                     | PID.                    | REACTOME_PRE_NOTCH_TRA   |
| 0 | 0. | NA           | .  | .    | .        | .      | .                       | .                       | .                        |
| 0 | 0. | NA           | .  | .    | .        | .      | .                       | .                       | .                        |
| 0 | 0. | NA           | .  | .    | .        | .      | .                       | .                       | .                        |
| 0 | 0. | NA           | .  | .    | .        | .      | .                       | .                       | .                        |
| 0 | 0. | NA           | .  | .    | .        | .      | .                       | .                       | .                        |
| 0 | 0. | NA           | .  | .    | .        | .      | .                       | .                       | .                        |
| 0 | 0. | NA           | .  | .    | .        | .      | .                       | .                       | .                        |
| 0 | 0. | NA           | .  | .    | CATI.    | .      | .                       | .                       | .                        |
| 0 | 0. | NA           | .  | .    | .        | .      | .                       | .                       | .                        |
| 0 | 0. | NA           | .  | SIG  | RAS.     | .      | .                       | .                       | .                        |
| 0 | 0. | NA           | .  | .    | .        | .      | .                       | .                       | .                        |
| 0 | 0. | NA           | .  | REG. | .        | KEC    | PID.                    | REACTOME_REGULATION_OF_ |                          |
| 0 | 0  | Cardiomyo    | NA | .    | MUS      | ORGN   | NUCL                    | KEC.                    | .                        |
| 0 | 0. | NA           | .  | .    | .        | .      | .                       | PID                     | BIO.                     |
| 0 | 0  | Spinocere    | NA | .    | .        | INTR   | CATI                    | KEC.                    | .                        |
| 0 | 0. | NA           | .  | .    | .        | .      | .                       | .                       | .                        |
| 0 | 0. | NA           | .  | .    | PRO      | CATI.  | .                       | .                       | .                        |
| 0 | 0. | NA           | .  | SYS  | INTR     | LIPOI. | .                       | .                       | .                        |
| 0 | 0. | NA           | .  | .    | .        | .      | .                       | .                       | .                        |
| 0 | 0. | NA           | .  | .    | .        | .      | KEC                     | PID.                    | REACTOME_INTEGRIN_CELL_  |
| 0 | 0. | NA           | .  | .    | .        | .      | .                       | .                       | .                        |
| 0 | 0  | Megaloblas   | NA | .    | .        | .      | KEC                     | PID                     | BIO                      |
| 0 | 0. | NA           | .  | .    | .        | .      | .                       | .                       | REACTOME_TETRAHYDROBIO   |
| 0 | 0. | NA           | .  | .    | .        | .      | .                       | .                       | .                        |
| 0 | 0. | NA           | .  | .    | .        | .      | .                       | .                       | .                        |
| 0 | 0. | NA           | .  | SIG  | INTR     | GABA   | KEC.                    | REACTOME_TRANSMISSION_A |                          |
| 0 | 0. | NA           | .  | DNA  | NUC      | HYDF.  | .                       | .                       | .                        |
| 0 | 0. | NA           | .  | .    | .        | .      | .                       | .                       | REACTOME_PHOSPHOLIPID_M  |
| 0 | 0. | NA           | .  | .    | .        | KEC.   | REACTOME_PPARA_ACTIVATE |                         |                          |
| 0 | 0  | Muscular d   | NA | .    | MUS      | PRO    | STRL                    | KEC                     | PID                      |
| 0 | 0  | Mental ret   | NA | .    | .        | NUC    | DNA.                    | .                       | BIO                      |
| 0 | 0. | NA           | .  | SIG  | CELL     | PRO    | KEC                     | PID.                    | REACTOME_INTEGRIN_CELL_  |
| 0 | 0  | Spinocere    | NA | .    | RNA      | NUC    | RNA_                    | KEC                     | PID                      |
| 0 | 0. | NA           | .  | .    | .        | .      | .                       | .                       | BIO                      |
| 0 | 0  | Colorectal   | NA | .    | DNA.     | SING   | KEC                     | PID.                    | REACTOME_RNA_POL_III_TRA |
| 0 | 0. | NA           | .  | .    | .        | .      | .                       | .                       | .                        |
| 0 | 0. | NA           | .  | .    | .        | .      | .                       | .                       | .                        |
| 0 | 0. | NA           | .  | .    | .        | .      | .                       | .                       | .                        |
| 0 | 0. | NA           | .  | .    | .        | .      | .                       | .                       | .                        |
| 0 | 0. | NA           | .  | .    | .        | .      | .                       | .                       | .                        |
| 0 | 0  | Maturity-or  | NA | .    | SIG      | .      | .                       | PID.                    | REACTOME_ANTIGEN_ACTIVAT |
| 0 | 0. | NA           | .  | .    | .        | .      | .                       | .                       | .                        |
| 0 | 0. | NA           | .  | .    | .        | .      | .                       | .                       | .                        |
| 0 | 0. | NA           | .  | .    | CYT      | ELEC   | KEC.                    | REACTOME_TCA_CYCLE_AND  |                          |
| 0 | 0. | NA           | .  | SIG  | EXTI     | HYDF   | KEC                     | PID.                    | REACTOME_GASTRIN_CREB_   |
| 0 | 0. | NA           | .  | .    | .        | .      | KEC.                    | .                       | .                        |

|   |    |             |                    |                |                         |
|---|----|-------------|--------------------|----------------|-------------------------|
| 0 | 0. | NA          | REG UBICACID.      |                |                         |
| 0 | 0. | NA          | CYT(               | KEC.           |                         |
| 0 | 0. | NA          | CELI MEM/CATI(KEC. |                | REACTOME_TRANSMISSION_A |
| 0 | 0  | Cardiomyo   | NA                 |                |                         |
| 0 | 0. | NA          |                    |                |                         |
| 0 | 0. | NA          |                    |                |                         |
| 0 | 0. | NA          | NUC NUCL           | KEC.           |                         |
| 0 | 0. | NA          |                    |                |                         |
| 0 | 0. | NA          | POS.               |                | KEC PID, BIO(           |
| 0 | 0. | NA          |                    |                |                         |
| 0 | 0. | NA          |                    | RAS_.          | PID.                    |
| 0 | 0. | NA          |                    |                |                         |
| 0 | 0. | NA          | GLYC(              | TRAN           | KEC.                    |
| 0 | 0. | NA          |                    |                | REACTOME_METABOLISM_OF_ |
| 0 | 0. | NA          |                    |                |                         |
| 0 | 0. | NA          | PRO COLL.          |                |                         |
| 0 | 0  | Spastic pai | NA                 |                |                         |
| 0 | 0. | NA          |                    |                |                         |
| 0 | 0. | NA          |                    |                |                         |
| 0 | 0. | NA          |                    |                |                         |
| 0 | 0. | NA          |                    |                |                         |
| 0 | 0  | Congenital  | NA                 | REG ORG.       |                         |
| 0 | 0. | NA          |                    |                |                         |
| 0 | 0. | NA          |                    |                |                         |
| 0 | 0. | NA          | INTR.              |                |                         |
| 0 | 0. | NA          | RES EXTIG_PF       | KEC PID, BIO(  | REACTOME_SIGNALING_BY_G |
| 0 | 0. | NA          |                    |                |                         |
| 0 | 0. | NA          |                    |                |                         |
| 0 | 0. | NA          |                    |                | KEC PID.                |
| 0 | 0. | NA          |                    |                | REACTOME_GAP_JUNCTION_I |
| 0 | 0  | Amyotroph   | NA                 | PRO ORG HYDF.  |                         |
| 0 | 0  | 46XY sex r  | NA                 |                |                         |
| 0 | 0. | NA          | PRO ORG CHAF.      |                | REACTOME_PROTEIN_FOLDIN |
| 0 | 0. | NA          |                    |                |                         |
| 0 | 0. | NA          |                    |                |                         |
| 0 | 0. | NA          |                    | GLUT           | KEC.                    |
| 0 | 0. | NA          | LIPIE.             | SUBS.          |                         |
| 0 | 0. | NA          | SIGN INTR.         |                | REACTOME_CELL_CELL_COMI |
| 0 | 0  | Exocrine p  | NA                 |                | CATI(KEC.               |
| 0 | 0. | NA          |                    |                |                         |
| 0 | 0. | NA          |                    |                |                         |
| 0 | 0. | NA          |                    |                |                         |
| 0 | 0. | NA          |                    |                |                         |
| 0 | 0. | NA          |                    |                |                         |
| 0 | 0  | Chondrody   | NA                 | BIOF NUC HYDF. | PID, BIO(               |
| 0 | 0. | NA          |                    |                | REACTOME_NOTCH1_INTRACI |
| 0 | 0  | Dent disea  | NA                 | CM0 EST/INTR.  |                         |
| 0 | 0. | NA          |                    |                |                         |
| 0 | 0. | NA          |                    |                |                         |
| 0 | 0. | NA          |                    |                |                         |

|   |    |             |    |          |          |       |       |       |                          |
|---|----|-------------|----|----------|----------|-------|-------|-------|--------------------------|
| 0 | 0. | NA          | .  | .        | .        | .     | .     | .     | .                        |
| 0 | 0. | NA          | .  | .        | .        | .     | .     | .     | .                        |
| 0 | 0. | NA          | .  | .        | .        | .     | .     | .     | .                        |
| 0 | 0. | NA          | .  | .        | .        | .     | .     | .     | .                        |
| 0 | 0. | NA          | .  | .        | .        | .     | .     | .     | .                        |
| 0 | 0. | NA          | .  | .        | .        | .     | .     | .     | .                        |
| 0 | 0. | NA          | .  | .        | .        | .     | .     | .     | .                        |
| 0 | 0. | NA          | .  | .        | .        | .     | .     | .     | .                        |
| 0 | 0. | NA          | .  | POS INTR | LIPID    | KEC.  | .     | .     | .                        |
| 0 | 0. | NA          | .  | .        | .        | .     | .     | .     | REACTOME_TRANSMEMBRANI   |
| 0 | 0. | NA          | .  | .        | .        | .     | .     | .     | .                        |
| 0 | 0  | Miyoshi mt  | NA | .        | SYS      | MEM.  | .     | .     | .                        |
| 0 | 0  | Miyoshi mt  | NA | .        | SYS      | MEM.  | .     | .     | .                        |
| 0 | 0. | NA          | .  | .        | .        | .     | .     | .     | .                        |
| 0 | 0. | NA          | .  | .        | .        | .     | .     | .     | .                        |
| 0 | 0. | NA          | .  | .        | .        | .     | .     | .     | .                        |
| 0 | 0. | NA          | .  | .        | INTR.    | .     | PID.  | .     | REACTOME_DEVELOPMENTAL   |
| 0 | 0. | NA          | .  | .        | .        | .     | .     | .     | .                        |
| 0 | 0. | NA          | .  | .        | EXTI.    | .     | KEC.  | .     | .                        |
| 0 | 0. | NA          | .  | .        | .        | .     | .     | .     | .                        |
| 0 | 0  | Adams-Oli   | NA | .        | .        | .     | .     | .     | REACTOME_SIGNALING_BY_RI |
| 0 | 0  | Myopia 23,  | NA | .        | PRO INTR | CARE. | PID.  | .     | .                        |
| 0 | 0. | NA          | .  | .        | RIBC     | RNA_. | .     | .     | .                        |
| 0 | 0. | NA          | .  | .        | .        | .     | .     | .     | .                        |
| 0 | 0. | NA          | .  | .        | .        | .     | .     | .     | .                        |
| 0 | 0. | NA          | .  | .        | .        | .     | .     | .     | .                        |
| 0 | 0. | NA          | .  | .        | .        | .     | .     | .     | .                        |
| 0 | 0. | NA          | .  | .        | .        | .     | .     | .     | .                        |
| 0 | 0. | NA          | .  | .        | .        | .     | .     | .     | .                        |
| 0 | 0. | NA          | .  | .        | .        | .     | KEC.  | .     | .                        |
| 0 | 0  | Cockayne    | NA | .        | DNA      | ORG   | HYDF  | KEC.  | REACTOME_TRANSCRIPTION_  |
| 0 | 0. | NA          | .  | .        | .        | .     | .     | .     | .                        |
| 0 | 0. | NA          | .  | .        | .        | .     | .     | .     | REACTOME_TRANSMEMBRANI   |
| 0 | 0. | NA          | .  | .        | .        | .     | .     | .     | .                        |
| 0 | 0. | NA          | .  | .        | .        | .     | KEC.  | .     | REACTOME_DEVELOPMENTAL   |
| 0 | 0. | NA          | .  | .        | .        | .     | .     | .     | .                        |
| 0 | 0  | {Asthma, s  | NA | .        | DEFI.    | RECE  | KEC.  | .     | REACTOME_ANTIGEN_PROCE   |
| 0 | 0  | Ehlers-Dar  | NA | .        | ORG      | PRO   | INTE  | (KEC. | .                        |
| 0 | 0. | NA          | .  | .        | RNA      | NUC.  | .     | .     | .                        |
| 0 | 0. | NA          | .  | .        | .        | .     | .     | .     | .                        |
| 0 | 0  | {Colchicine | NA | .        | EST/CELI | NUCL  | KEC   | PID   | BIO(                     |
| 0 | 0. | NA          | .  | .        | SYS      | INTR. | KEC   | PID.  | .                        |
| 0 | 0. | NA          | .  | .        | CYT      | (PHO  | KEC.  | .     | REACTOME_GASTRIN_CREB_   |
| 0 | 0. | NA          | .  | .        | CYT      | (PHO  | KEC.  | .     | REACTOME_GASTRIN_CREB_   |
| 0 | 0. | NA          | .  | .        | .        | .     | KEC.  | .     | REACTOME_SIGNALING_BY_G  |
| 0 | 0. | NA          | .  | .        | PRO.     | .     | .     | .     | .                        |
| 0 | 0. | NA          | .  | .        | .        | .     | .     | .     | .                        |
| 0 | 0  | Diabetes rr | NA | .        | RNA      | NUC   | SPEC. | .     | .                        |
| 0 | 0. | NA          | .  | .        | .        | .     | .     | .     | .                        |
| 0 | 0. | NA          | .  | .        | .        | .     | .     | .     | .                        |
| 0 | 0. | NA          | .  | .        | .        | .     | .     | .     | .                        |
| 0 | 0. | NA          | .  | .        | .        | .     | .     | .     | .                        |
| 0 | 0. | NA          | .  | .        | CELI     | MEM   | CATI  | (KEC. | REACTOME_TRANSMISSION_A  |
| 0 | 0. | NA          | .  | .        | .        | .     | .     | .     | .                        |
| 0 | 0. | NA          | .  | .        | .        | .     | .     | .     | REACTOME_GENERIC_TRANSI  |

|   |    |             |    |          |          |       |      |                          |                        |                          |
|---|----|-------------|----|----------|----------|-------|------|--------------------------|------------------------|--------------------------|
| 0 | 0. | NA          | .  | .        | .        | .     | .    | .                        | .                      |                          |
| 0 | 0. | NA          | .  | .        | .        | .     | .    | .                        | .                      |                          |
| 0 | 0. | NA          | .  | .        | .        | .     | .    | .                        | .                      |                          |
| 0 | 0. | NA          | .  | PHO INTR | PHOS.    | PID.  |      | REACTOME_SYNTHESIS_OF_F  |                        |                          |
| 0 | 0. | NA          | .  | .        | .        | KEC   | PID. | REACTOME_CELL_CELL_COMI  |                        |                          |
| 0 | 0  | Ataxia-tela | NA | .        | DNA.     | PHOS  | KEC  | PID.                     | BIO                    | REACTOME_MEIOSIS;REACTO  |
| 0 | 0. | NA          | .  | .        | CYT(.    | .     | .    | REACTOME_DIABETES_PATHV  |                        |                          |
| 0 | 0. | NA          | .  | .        | .        | .     | .    | .                        | .                      |                          |
| 0 | 0. | NA          | .  | .        | .        | .     | .    | .                        | .                      |                          |
| 0 | 0  | Leukemia,   | NA | .        | .        | TRAN  | KEC. | .                        | .                      |                          |
| 0 | 0  | Bladder ca  | NA | CM0.     | .        | .     | KEC  | PID.                     | BIO                    | REACTOME_SIGNALLING_BY_I |
| 0 | 0  | Spastic pai | NA | .        | EST/ORG. | .     | .    | REACTOME_MHC_CLASS_II_AI |                        |                          |
| 0 | 0. | NA          | .  | .        | .        | .     | .    | REACTOME_NEURONAL_SYST   |                        |                          |
| 0 | 0. | NA          | .  | .        | .        | .     | .    | .                        | .                      |                          |
| 0 | 0. | NA          | .  | .        | .        | .     | .    | .                        | .                      |                          |
| 0 | 0. | NA          | .  | .        | .        | .     | .    | .                        | .                      |                          |
| 0 | 0. | NA          | .  | .        | .        | .     | .    | .                        | .                      |                          |
| 0 | 0. | NA          | .  | .        | .        | .     | .    | .                        | .                      |                          |
| 0 | 0  | Prader-Wil  | NA | .        | NEG.     | .     | PID. | .                        | .                      |                          |
| 0 | 0. | NA          | .  | SIGN     | INTR.    | KEC.  | BIO  | REACTOME_TRANSMISSION_A  |                        |                          |
| 0 | 0. | NA          | .  | .        | .        | .     | .    | .                        | .                      |                          |
| 0 | 0. | NA          | .  | .        | .        | .     | .    | .                        | .                      |                          |
| 0 | 0. | NA          | .  | .        | .        | .     | .    | .                        | .                      |                          |
| 0 | 0. | NA          | .  | .        | .        | .     | .    | .                        | .                      |                          |
| 0 | 0. | NA          | .  | SYS      | .        | .     | .    | .                        | .                      |                          |
| 0 | 0. | NA          | .  | .        | .        | .     | .    | .                        | .                      |                          |
| 0 | 0  | Autoinflam  | NA | .        | .        | .     | KEC  | PID.                     | REACTOME_ANTIGEN_ACTIV |                          |
| 0 | 0. | NA          | .  | .        | .        | .     | PID. | .                        | .                      |                          |
| 0 | 0. | NA          | .  | .        | .        | .     | .    | .                        | .                      |                          |
| 0 | 0. | NA          | .  | .        | .        | .     | .    | .                        | .                      |                          |
| 0 | 0. | NA          | .  | .        | .        | .     | .    | .                        | .                      |                          |
| 0 | 0. | NA          | .  | .        | PROT.    | .     | .    | .                        | .                      |                          |
| 0 | 0. | NA          | .  | .        | .        | .     | .    | .                        | .                      |                          |
| 0 | 0  | Adams-Oli   | NA | .        | .        | .     | PID. | REACTOME_FACTORS_INVOL   |                        |                          |
| 0 | 0. | NA          | .  | .        | .        | .     | .    | .                        | .                      |                          |
| 0 | 0. | NA          | .  | .        | .        | .     | .    | REACTOME_GENERIC_TRANSI  |                        |                          |
| 0 | 0. | NA          | .  | .        | .        | .     | .    | .                        | .                      |                          |
| 0 | 0. | NA          | .  | REG      | CYT(     | PROT. | .    | .                        | .                      |                          |
| 0 | 0. | NA          | .  | .        | .        | .     | .    | .                        | .                      |                          |
| 0 | 0. | NA          | .  | .        | .        | .     | .    | .                        | .                      |                          |
| 0 | 0. | NA          | .  | .        | .        | .     | .    | .                        | .                      |                          |
| 0 | 0. | NA          | .  | .        | .        | .     | .    | .                        | .                      |                          |
| 0 | 0. | NA          | .  | CELI     | INTR.    | KEC.  | .    | .                        | .                      |                          |
| 0 | 0. | NA          | .  | REG      | COA.     | .     | .    | REACTOME_TRANSMISSION_A  |                        |                          |
| 0 | 0. | NA          | .  | .        | .        | .     | .    | .                        | .                      |                          |
| 0 | 0. | NA          | .  | .        | .        | .     | .    | .                        | .                      |                          |
| 0 | 0. | NA          | .  | .        | .        | .     | PID. | .                        | .                      |                          |
| 0 | 0  | Lymphoprc   | NA | .        | CELI     | CYT(. | KEC  | PID.                     | .                      |                          |
| 0 | 0. | NA          | .  | .        | .        | .     | .    | .                        | .                      |                          |
| 0 | 0. | NA          | .  | .        | .        | .     | .    | .                        | .                      |                          |



|   |    |                |               |      |      |                          |      |                         |
|---|----|----------------|---------------|------|------|--------------------------|------|-------------------------|
| 0 | 0  | Favism;He NA   | CM9 GLU CYT(  | KEC. | .    | REACTOME_METABOLISM_OF_  |      |                         |
| 0 | 0. | NA             | .             | .    | .    | .                        |      |                         |
| 0 | 0. | NA             | NUC.          | KEC. | .    | REACTOME_METABOLISM_OF_  |      |                         |
| 0 | 0. | NA             | .             | .    | .    | .                        |      |                         |
| 0 | 0. | NA             | DETI.         | TAST | KEC. | REACTOME_SIGNALING_BY_G  |      |                         |
| 0 | 0. | NA             | SIG CYT GTPA. | .    | .    | REACTOME_RAP1_SIGNALLINK |      |                         |
| 0 | 0. | NA             | .             | .    | .    | .                        |      |                         |
| 0 | 0. | NA             | .             | .    | .    | .                        |      |                         |
| 0 | 0. | NA             | .             | .    | .    | .                        |      |                         |
| 0 | 0. | NA             | .             | .    | .    | .                        |      |                         |
| 0 | 0. | NA             | .             | .    | .    | .                        |      |                         |
| 0 | 0. | NA             | .             | .    | .    | .                        |      |                         |
| 0 | 0. | NA             | .             | .    | .    | .                        |      |                         |
| 0 | 0. | NA             | .             | .    | .    | .                        |      |                         |
| 0 | 0. | NA             | .             | .    | .    | .                        |      |                         |
| 0 | 0. | NA             | .             | .    | .    | .                        |      |                         |
| 0 | 0. | NA             | .             | .    | .    | .                        |      |                         |
| 0 | 0. | NA             | .             | .    | .    | .                        |      |                         |
| 0 | 0. | NA             | .             | .    | .    | .                        |      |                         |
| 0 | 0. | NA             | .             | .    | .    | .                        |      |                         |
| 0 | 0  | Chronic gr NA  | DEFI.         | ELEC | KEC  | PID                      | BIO  | REACTOME_ANTIGEN_PROCE: |
| 0 | 0. | NA             | MUS           | INTR | CATI | .                        | .    | REACTOME_NEURONAL_SYST  |
| 0 | 0. | NA             | .             | .    | .    | .                        | .    | .                       |
| 0 | 0. | NA             | .             | .    | .    | .                        | .    | .                       |
| 0 | 0. | NA             | .             | .    | .    | .                        | .    | .                       |
| 0 | 0. | NA             | .             | .    | .    | .                        | .    | .                       |
| 0 | 0. | NA             | .             | .    | .    | .                        | .    | .                       |
| 0 | 0  | Leukodystr NA  | CELI          | ORG  | CHAF | KEC                      | PID. | REACTOME_MITOCHONDRIAL_ |
| 0 | 0. | NA             | EST/          | NUC. | .    | .                        | .    | .                       |
| 0 | 0  | Multiple su NA | .             | .    | .    | KEC.                     | .    | REACTOME_PTM_GAMMA_CAF  |
| 0 | 0. | NA             | .             | .    | .    | KEC                      | PID. | REACTOME_BMAL1_CLOCK_NI |
| 0 | 0. | NA             | .             | .    | .    | .                        | .    | .                       |
| 0 | 0. | NA             | .             | .    | .    | .                        | PID. | REACTOME_CELL_CYCLE;REA |
| 0 | 0. | NA             | .             | .    | .    | .                        | .    | .                       |
| 0 | 0. | NA             | .             | .    | .    | .                        | .    | .                       |
| 0 | 0. | NA             | .             | .    | .    | .                        | .    | .                       |
| 0 | 0. | NA             | CELI          | NUC. | .    | .                        | .    | .                       |
| 0 | 0. | NA             | CELI          | NUC. | .    | .                        | .    | .                       |
| 0 | 0. | NA             | .             | .    | .    | KEC.                     | .    | .                       |
| 0 | 0. | NA             | .             | .    | .    | .                        | .    | .                       |
| 0 | 0. | NA             | .             | .    | .    | .                        | .    | .                       |
| 0 | 0. | NA             | .             | .    | .    | .                        | .    | .                       |
| 0 | 0. | NA             | .             | .    | .    | .                        | .    | .                       |
| 0 | 0. | NA             | .             | .    | .    | .                        | .    | .                       |
| 0 | 0. | NA             | .             | .    | .    | .                        | .    | .                       |
| 0 | 0. | NA             | .             | .    | .    | .                        | .    | .                       |
| 0 | 0. | NA             | .             | .    | .    | .                        | .    | .                       |
| 0 | 0. | NA             | .             | .    | .    | .                        | .    | .                       |
| 0 | 0. | NA             | .             | .    | .    | .                        | .    | .                       |
| 0 | 0. | NA             | .             | .    | .    | .                        | .    | .                       |
| 0 | 0. | NA             | .             | .    | .    | .                        | .    | .                       |
| 0 | 0. | NA             | .             | .    | .    | .                        | .    | .                       |
| 0 | 0. | NA             | .             | .    | .    | .                        | .    | .                       |
| 0 | 0. | NA             | .             | .    | .    | .                        | .    | .                       |
| 0 | 0. | NA             | .             | .    | .    | .                        | .    | .                       |
| 0 | 0. | NA             | .             | .    | .    | .                        | .    | .                       |
| 0 | 0. | NA             | .             | .    | .    | .                        | .    | .                       |
| 0 | 0. | NA             | POS           | CYT( | .    | .                        | .    | .                       |
| 0 | 0. | NA             | .             | .    | .    | .                        | .    | .                       |
| 0 | 0. | NA             | .             | .    | .    | .                        | .    | .                       |
| 0 | 0  | {Prostate c NA | REG           | CYT( | STRU | KEC                      | PID. | .                       |

|   |               |    |   |      |      |       |      |          |                         |
|---|---------------|----|---|------|------|-------|------|----------|-------------------------|
| 0 | 0 {Coronary   | NA | . | .    | .    | HYDF. | .    | .        | .                       |
| 0 | 0.            | NA | . | SIGN | NUC  | TRAN. | PID  | BIO      | .                       |
| 0 | 0.            | NA | . | .    | CYT  | .     | .    | .        | .                       |
| 0 | 0.            | NA | . | NUC  | .    | .     | .    | REACTOME | METABOLISM_OF_          |
| 0 | 0.            | NA | . | .    | .    | .     | .    | .        | .                       |
| 0 | 0.            | NA | . | .    | .    | .     | .    | .        | .                       |
| 0 | 0.            | NA | . | .    | .    | KEC   | .    | REACTOME | INSULIN_RECEPT          |
| 0 | 0.            | NA | . | .    | .    | .     | .    | .        | .                       |
| 0 | 0.            | NA | . | .    | .    | .     | .    | .        | .                       |
| 0 | 0.            | NA | . | SYS  | COA  | .     | .    | .        | .                       |
| 0 | 0.            | NA | . | BIO  | EXTI | .     | .    | REACTOME | SIGNALLING_BY_I         |
| 0 | 0.            | NA | . | .    | .    | .     | .    | .        | .                       |
| 0 | 0.            | NA | . | .    | .    | .     | .    | .        | .                       |
| 0 | 0 Candidiasis | NA | . | POS  | CYT  | PRO   | KEC  | .        | REACTOME_INNATE_IMMUNE_ |
| 0 | 0.            | NA | . | .    | .    | .     | .    | .        | .                       |
| 0 | 0.            | NA | . | .    | .    | .     | .    | .        | .                       |
| 0 | 0.            | NA | . | SYS  | CELL | .     | KEC  | .        | REACTOME_CELL_CELL_COMI |
| 0 | 0.            | NA | . | .    | .    | .     | .    | .        | .                       |
| 0 | 0.            | NA | . | .    | .    | .     | .    | .        | .                       |
| 0 | 0.            | NA | . | REP  | EXT  | MET   | KEC  | .        | .                       |
| 0 | 0.            | NA | . | CELL | CYT  | GTP   | KEC  | PID      | BIO                     |
| 0 | 0.            | NA | . | .    | .    | .     | .    | REACTOME | DEVELOPMENTAL           |
| 0 | 0.            | NA | . | .    | .    | .     | KEC  | BIO      | REACTOME_METABOLISM_OF_ |
| 0 | 0 Hermansky   | NA | . | .    | .    | .     | .    | .        | .                       |
| 0 | 0.            | NA | . | .    | .    | .     | .    | .        | .                       |
| 0 | 0.            | NA | . | .    | .    | .     | .    | .        | .                       |
| 0 | 0.            | NA | . | .    | .    | .     | .    | .        | .                       |
| 0 | 0.            | NA | . | .    | .    | .     | .    | .        | .                       |
| 0 | 0.            | NA | . | .    | .    | .     | .    | .        | .                       |
| 0 | 0 Achondrog   | NA | . | SYS  | .    | .     | KEC  | PID      | REACTOME_DEVELOPMENTAL  |
| 0 | 0.            | NA | . | .    | .    | .     | .    | .        | .                       |
| 0 | 0.            | NA | . | .    | .    | .     | .    | .        | .                       |
| 0 | 0 Transpositi | NA | . | .    | .    | .     | .    | REACTOME | DEVELOPMENTAL           |
| 0 | 0 Diabetes nr | NA | . | CM0  | REG  | MAC   | TRAN | KEC      | PID                     |
| 0 | 0.            | NA | . | .    | .    | .     | .    | PID      | REACTOME_FACTORS_INVOLA |
| 0 | 0.            | NA | . | ONE  | .    | MET   | .    | PID      | REACTOME_METABOLISM_OF_ |
| 0 | 0.            | NA | . | .    | .    | .     | .    | .        | .                       |
| 0 | 0.            | NA | . | .    | .    | .     | .    | .        | .                       |
| 0 | 0 Prader-Wil  | NA | . | NEG  | .    | .     | .    | PID      | .                       |
| 0 | 0.            | NA | . | MAC  | CELL | .     | KEC  | PID      | REACTOME_APOPTOTIC_CLEA |
| 0 | 0.            | NA | . | .    | .    | .     | .    | .        | REACTOME_TRANSMISSION_A |
| 0 | 0.            | NA | . | .    | .    | .     | .    | .        | .                       |
| 0 | 0.            | NA | . | .    | .    | .     | .    | .        | .                       |
| 0 | 0.            | NA | . | .    | .    | .     | .    | .        | .                       |
| 0 | 0.            | NA | . | .    | .    | .     | .    | .        | .                       |
| 0 | 0.            | NA | . | .    | .    | .     | .    | .        | .                       |
| 0 | 0.            | NA | . | .    | .    | .     | KEC  | PID      | .                       |
| 0 | 0.            | NA | . | SIGN | .    | RECE  | .    | .        | .                       |
| 0 | 0.            | NA | . | REG  | CYT  | .     | .    | .        | .                       |
| 0 | 0.            | NA | . | .    | .    | .     | .    | .        | .                       |
| 0 | 0.            | NA | . | AMIN | ORG  | SULF  | KEC  | .        | .                       |
| 0 | 0.            | NA | . | .    | .    | .     | .    | .        | .                       |

|   |   |              |         |          |       |                                  |
|---|---|--------------|---------|----------|-------|----------------------------------|
| 0 | 0 | NA           | INTR    | KEC      | PID   | REACTOME_INTEGRIN_CELL_          |
| 0 | 0 | NA           | DNA NUC | PRO1     |       |                                  |
| 0 | 0 | NA           |         |          |       |                                  |
| 0 | 0 | NA           | BIOCYT  | ELEC     | PID   |                                  |
| 0 | 0 | Epidermol    | INTR    | KEC      | PID   | REACTOME_CELL_CELL_COMI          |
| 0 | 0 | NA           |         | KEC      | PID   | REACTOME_INSULIN_RECEPT          |
| 0 | 0 | NA           | BIOF    | CELIOXID |       | BIO( REACTOME_EXTRACELLULAR      |
| 0 | 0 | NA           | CELI    | INTR     | RECE  | KEC. BIO(                        |
| 0 | 0 | NA           |         |          |       | REACTOME_O_LINKED_GLYCC          |
| 0 | 0 | NA           |         |          |       | REACTOME_O_LINKED_GLYCC          |
| 0 | 0 | NA           |         |          |       |                                  |
| 0 | 0 | NA           |         |          |       |                                  |
| 0 | 0 | NA           | NEG     | TRAN     |       |                                  |
| 0 | 0 | NA           | RNA     | TRAN     | PID   |                                  |
| 0 | 0 | NA           | RNA     | TRAN     | PID   |                                  |
| 0 | 0 | NA           | RNA     | TRAN     | PID   |                                  |
| 0 | 0 | NA           |         |          |       | REACTOME_GENERIC_TRANSI          |
| 0 | 0 | NA           |         |          |       |                                  |
| 0 | 0 | NA           |         |          |       |                                  |
| 0 | 0 | NA           |         |          |       |                                  |
| 0 | 0 | NA           | REP     | INTR     |       |                                  |
| 0 | 0 | [Bombay p    | GLY     | (INTR    | TRAN  | KEC. . .                         |
| 0 | 0 | [Bombay p    | GLY     | (INTR    | TRAN  | KEC. . .                         |
| 0 | 0 | NA           | POS     | EXTI     | RECE  |                                  |
| 0 | 0 | NA           |         |          |       | REACTOME_GENERIC_TRANSI          |
| 0 | 0 | NA           |         |          | KEC   |                                  |
| 0 | 0 | NA           |         |          |       | REACTOME_TRIGLYCERIDE_B          |
| 0 | 0 | NA           |         |          |       |                                  |
| 0 | 0 | NA           | BIOF    | INTR     | PRO1  |                                  |
| 0 | 0 | NA           | INTR    |          |       |                                  |
| 0 | 0 | NA           | SYS     | PRO      |       |                                  |
| 0 | 0 | NA           | MUS     | NON      | ACTII |                                  |
| 0 | 0 | NA           |         |          |       |                                  |
| 0 | 0 | NA           |         | CYT      |       | PID. REACTOME_SIGNALING_BY_RI    |
| 0 | 0 | NA           |         |          |       |                                  |
| 0 | 0 | NA           |         |          |       |                                  |
| 0 | 0 | {Epilepsy, ( | SIG     | INTR     | GAB/  | KEC. . .                         |
| 0 | 0 | Palmoplan    |         |          |       | PID. . .                         |
| 0 | 0 | NA           |         |          |       |                                  |
| 0 | 0 | NA           | NUC     |          | KEC   | PID. BIO( REACTOME_DOWNREGULATIC |
| 0 | 0 | Ciliary dys  |         |          |       | PID. . .                         |
| 0 | 0 | Glycogen ε   | MAC     |          | KEC   | . REACTOME_GLYCOGEN_BREA         |
| 0 | 0 | NA           |         |          |       |                                  |
| 0 | 0 | NA           |         |          |       |                                  |
| 0 | 0 | NA           |         |          |       |                                  |
| 0 | 0 | NA           |         |          |       |                                  |
| 0 | 0 | NA           |         | HYDF     |       |                                  |
| 0 | 0 | Epidermol    | SYS     |          | KEC   | PID. REACTOME_CELL_CELL_COMI     |
| 0 | 0 | NA           |         |          |       |                                  |
| 0 | 0 | NA           |         |          |       |                                  |
| 0 | 0 | NA           | RNA     | NUC      | TRAN  |                                  |
| 0 | 0 | Senior-Lok   | BIOF    |          | KEC   | PID. REACTOME_CELL_CYCLE;REA     |

|   |   |             |    |      |         |       |      |     |                          |
|---|---|-------------|----|------|---------|-------|------|-----|--------------------------|
| 0 | 0 | NA          | .  | .    | .       | .     | .    | .   | .                        |
| 0 | 0 | NA          | .  | .    | .       | .     | .    | .   | .                        |
| 0 | 0 | Short statu | NA | .    | .       | .     | .    | .   | .                        |
| 0 | 0 | NA          | .  | REG  | .       | NUCL  | KEC  | PID | .                        |
| 0 | 0 | GAPO syn    | NA | .    | .       | .     | .    | PID | .                        |
| 0 | 0 | NA          | .  | .    | .       | .     | .    | .   | .                        |
| 0 | 0 | Selective T | NA | .    | POS MEM | .     | KEC  | PID | BIO                      |
| 0 | 0 | NA          | .  | .    | .       | .     | .    | .   | .                        |
| 0 | 0 | NA          | .  | .    | .       | .     | .    | .   | .                        |
| 0 | 0 | NA          | .  | .    | .       | .     | .    | .   | .                        |
| 0 | 0 | Cardiomyo   | NA | .    | MUS ORG | NUCL  | KEC  | .   | .                        |
| 0 | 0 | NA          | .  | .    | .       | .     | .    | .   | .                        |
| 0 | 0 | NA          | .  | BIO  | CYT     | (PRO  | KEC  | PID | BIO                      |
| 0 | 0 | NA          | .  | BIO  | CYT     | (PRO  | KEC  | PID | BIO                      |
| 0 | 0 | NA          | .  | .    | .       | .     | .    | .   | .                        |
| 0 | 0 | Microphtha  | NA | .    | .       | .     | .    | .   | .                        |
| 0 | 0 | NA          | .  | M_PI | ORG     | DNA   | .    | .   | BIO                      |
| 0 | 0 | NA          | .  | SYS  | INTR    | PF    | KEC  | .   | REACTOME_SIGNALING_BY_G  |
| 0 | 0 | NA          | .  | SYS  | INTR    | LIPID | .    | .   | .                        |
| 0 | 0 | NA          | .  | REG  | INTR    | .     | .    | .   | .                        |
| 0 | 0 | NA          | .  | REG  | INTR    | .     | .    | .   | .                        |
| 0 | 0 | NA          | .  | BIO  | STR     | KEC   | .    | .   | REACTOME_TRANSLATION;RE  |
| 0 | 0 | Deafness,   | NA | .    | .       | .     | .    | .   | .                        |
| 0 | 0 | NA          | .  | .    | .       | .     | KEC  | .   | .                        |
| 0 | 0 | Breast can  | NA | CM1  | .       | PHO   | KEC  | PID | BIO                      |
| 0 | 0 | Myopia 23,  | NA | .    | PRO     | INTR  | CARE | PID | .                        |
| 0 | 0 | NA          | .  | .    | .       | .     | .    | .   | .                        |
| 0 | 0 | NA          | .  | .    | .       | .     | .    | .   | REACTOME_TRANSMEMBRANI   |
| 0 | 0 | NA          | .  | .    | .       | .     | .    | .   | REACTOME_TRANSMEMBRANI   |
| 0 | 0 | NA          | .  | .    | .       | .     | .    | .   | .                        |
| 0 | 0 | NA          | .  | .    | .       | .     | .    | .   | .                        |
| 0 | 0 | NA          | .  | .    | .       | .     | .    | .   | .                        |
| 0 | 0 | NA          | .  | .    | .       | .     | KEC  | .   | .                        |
| 0 | 0 | NA          | .  | .    | .       | .     | .    | .   | .                        |
| 0 | 0 | NA          | .  | MEM  | RAS     | .     | .    | .   | .                        |
| 0 | 0 | NA          | .  | .    | .       | .     | .    | .   | .                        |
| 0 | 0 | NA          | .  | POS  | ORG     | RECE  | KEC  | PID | .                        |
| 0 | 0 | NA          | .  | .    | .       | .     | .    | .   | REACTOME_NEGATIVE_REGUI  |
| 0 | 0 | NA          | .  | .    | .       | .     | .    | .   | .                        |
| 0 | 0 | NA          | .  | .    | .       | .     | .    | .   | .                        |
| 0 | 0 | NA          | .  | .    | .       | .     | .    | .   | .                        |
| 0 | 0 | NA          | .  | RNA  | NUC     | RNA   | KEC  | .   | .                        |
| 0 | 0 | Cardiomyo   | NA | .    | PRO     | STR   | KEC  | PID | BIO                      |
| 0 | 0 | NA          | .  | .    | .       | .     | KEC  | .   | .                        |
| 0 | 0 | NA          | .  | SIGN | INTR    | PEPT  | KEC  | PID | .                        |
| 0 | 0 | NA          | .  | .    | .       | GTP   | KEC  | PID | .                        |
| 0 | 0 | NA          | .  | .    | .       | .     | .    | .   | REACTOME_SIGNALING_BY_G  |
| 0 | 0 | NA          | .  | .    | .       | .     | .    | .   | REACTOME_SIGNALING_BY_RI |
| 0 | 0 | NA          | .  | .    | .       | .     | .    | .   | .                        |
| 0 | 0 | NA          | .  | .    | .       | .     | .    | .   | .                        |
| 0 | 0 | NA          | .  | ORG  | HYDF    | .     | .    | .   | .                        |
| 0 | 0 | NA          | .  | .    | .       | .     | .    | .   | .                        |
| 0 | 0 | NA          | .  | .    | .       | .     | .    | .   | .                        |
| 0 | 0 | Shwachma    | NA | .    | .       | .     | .    | .   | .                        |
| 0 | 0 | NA          | .  | .    | .       | .     | .    | .   | .                        |
| 0 | 0 | NA          | .  | .    | .       | .     | .    | .   | REACTOME_O_LINKED_GLYCC  |

|   |    |              |    |               |           |          |                        |                          |                           |
|---|----|--------------|----|---------------|-----------|----------|------------------------|--------------------------|---------------------------|
| 0 | 0. | NA           | .  | .             | .         | .        | .                      | .                        | .                         |
| 0 | 0. | NA           | .  | .             | .         | .        | .                      | .                        | .                         |
| 0 | 0. | NA           | .  | .             | .         | .        | .                      | .                        | .                         |
| 0 | 0. | NA           | .  | BIOFORGTRAN.  |           | PID.BIO( | .                      | .                        | .                         |
| 0 | 0. | NA           | .  | .             | .         | .        | .                      | .                        | .                         |
| 0 | 0. | NA           | .  | EST/ORG.      | .         | .        | .                      | .                        | .                         |
| 0 | 0. | NA           | .  | ACTIADH STRL. | .         | .        | .                      | REACTOME_MUSCLE_CONTR/   |                           |
| 0 | 0. | NA           | .  | INTRCATI(     | .         | .        | .                      | REACTOME_DEGRADATION_O   |                           |
| 0 | 0. | NA           | .  | .             | .         | .        | .                      | .                        | .                         |
| 0 | 0. | NA           | .  | .             | .         | .        | .                      | .                        | .                         |
| 0 | 0. | NA           | .  | .             | .         | .        | .                      | .                        | .                         |
| 0 | 0. | NA           | .  | .             | .         | .        | .                      | .                        | .                         |
| 0 | 0  | 5-oxoprolir  | NA | .             | .         | KEC.     | .                      | REACTOME_BIOLOGICAL_OXII |                           |
| 0 | 0. | NA           | .  | .             | .         | .        | .                      | REACTOME_HIV_INFECTION;R |                           |
| 0 | 0. | NA           | .  | .             | .         | .        | .                      | .                        | .                         |
| 0 | 0. | NA           | .  | .             | .         | .        | .                      | .                        | .                         |
| 0 | 0. | NA           | .  | .             | .         | .        | .                      | .                        | .                         |
| 0 | 0. | NA           | .  | .             | .         | .        | .                      | .                        | .                         |
| 0 | 0. | NA           | .  | .             | .         | .        | .                      | .                        | .                         |
| 0 | 0. | NA           | .  | HOMCYT(       | IDEN' KEC | PID.BIO( | REACTOME_DEVELOPMENTAL |                          |                           |
| 0 | 0. | NA           | .  | .             | .         | .        | .                      | .                        | .                         |
| 0 | 0  | Pulmonary    | NA | .             | .         | PID.     | .                      | .                        | .                         |
| 0 | 0  | Cowden sy    | NA | .             | .         | .        | .                      | .                        | .                         |
| 0 | 0. | NA           | .  | .             | .         | .        | .                      | .                        | .                         |
| 0 | 0. | NA           | .  | .             | .         | .        | .                      | REACTOME_O_LINKED_GLYCC  |                           |
| 0 | 0. | NA           | .  | .             | .         | .        | .                      | .                        | .                         |
| 0 | 0  | Diabetes rr  | NA | .             | EST/      | CATI(KEC | PID.                   | REACTOME_NEURONAL_SYST   |                           |
| 0 | 0  | Glycogen ε   | NA | .             | CYT(OXID  | KEC      | PID.BIO(               | REACTOME_PYRUVATE_META   |                           |
| 0 | 0  | Dystonia 2   | NA | .             | .         | .        | .                      | .                        | .                         |
| 0 | 0. | NA           | .  | .             | .         | .        | .                      | .                        | .                         |
| 0 | 0. | NA           | .  | .             | .         | .        | .                      | .                        | .                         |
| 0 | 0. | NA           | .  | .             | .         | .        | .                      | .                        | .                         |
| 0 | 0. | NA           | .  | .             | .         | .        | .                      | .                        | .                         |
| 0 | 0  | Asphyxiatir  | NA | .             | ORGCYT(   | KEC.     | .                      | REACTOME_MHC_CLASS_II_AI |                           |
| 0 | 0. | NA           | .  | .             | .         | .        | .                      | .                        | .                         |
| 0 | 0. | NA           | .  | .             | .         | .        | .                      | REACTOME_TRANSMEMBRANI   |                           |
| 0 | 0. | NA           | .  | .             | .         | .        | .                      | .                        | .                         |
| 0 | 0. | NA           | .  | .             | .         | .        | .                      | .                        | .                         |
| 0 | 0  | Methylmalc   | NA | .             | .         | KEC.     | .                      | .                        | .                         |
| 0 | 0. | NA           | .  | .             | .         | .        | .                      | .                        | .                         |
| 0 | 0. | NA           | .  | .             | .         | .        | .                      | .                        | .                         |
| 0 | 0. | NA           | .  | .             | .         | .        | .                      | .                        | .                         |
| 0 | 0. | NA           | .  | .             | .         | .        | .                      | .                        | .                         |
| 0 | 0. | NA           | .  | .             | .         | .        | .                      | .                        | .                         |
| 0 | 0. | NA           | .  | PRO INTRCATI( | KEC       | PID.     | REACTOME_DEGRADATION_O |                          |                           |
| 0 | 0  | Atrial septa | NA | .             | REG ORG   | HYDF     | KEC.                   | REACTOME_STRIATED_MUSCI  |                           |
| 0 | 0. | NA           | .  | .             | .         | .        | .                      | .                        | .                         |
| 0 | 0. | NA           | .  | BIOF          | CELI      | NUCL.    | .                      | .                        | .                         |
| 0 | 0. | NA           | .  | .             | .         | .        | .                      | .                        | .                         |
| 0 | 0  | Angelman     | NA | .             | BIOF.     | KEC      | PID.BIO(               | REACTOME_IMMUNE_SYSTEM   |                           |
| 0 | 0. | NA           | .  | SYS'          | .         | .        | .                      | .                        | .                         |
| 0 | 0  | Colorectal   | NA | .             | MIT       | ORG.     | KEC                    | PID.                     | REACTOME_INHIBITION_OF_TI |
| 0 | 0. | NA           | .  | .             | .         | .        | .                      | .                        | .                         |
| 0 | 0. | NA           | .  | .             | .         | .        | .                      | .                        | .                         |

|   |                |      |              |                  |             |                          |
|---|----------------|------|--------------|------------------|-------------|--------------------------|
| 0 | 0 {Pseudoxa    | NA . | BIOS .       | UDP_KEC .        | .           | .                        |
| 0 | 0 .            | NA . | POS INTRRECE | KEC .            | .           | REACTOME_CELL_SURFACE_I  |
| 0 | 0 .            | NA . | SYS INTRRECE | KEC PID.BIO      | .           | REACTOME_CELL_SURFACE_I  |
| 0 | 0 .            | NA . | REG INTRCATI | ( .              | .           | REACTOME_TRANSMEMBRANI   |
| 0 | 0 .            | NA . | MUL UBIGACID | KEC .            | .           | .                        |
| 0 | 0 .            | NA . | .            | .                | .           | .                        |
| 0 | 0 .            | NA . | POS INTRG_PF | KEC .            | .           | REACTOME_SIGNALING_BY_G  |
| 0 | 0 .            | NA . | .            | MOT(KEC .        | .           | .                        |
| 0 | 0 .            | NA . | .            | .                | .           | .                        |
| 0 | 0 Alexander    | NA . | .            | ORG STRL .       | .           | REACTOME_SIGNALING_BY_EI |
| 0 | 0 .            | NA . | .            | .                | KEC .       | REACTOME_ABCA_TRANSPOR   |
| 0 | 0 .            | NA . | PRO ORGCHAF  | .                | .           | REACTOME_PROTEIN_FOLDIN  |
| 0 | 0 .            | NA . | .            | .                | .           | .                        |
| 0 | 0 [Blood gro   | NA . | EST/INTRSUBS | .                | .           | REACTOME_TRANSMEMBRANI   |
| 0 | 0 .            | NA . | .            | .                | .           | .                        |
| 0 | 0 .            | NA . | .            | .                | .           | .                        |
| 0 | 0 .            | NA . | .            | .                | .           | .                        |
| 0 | 0 .            | NA . | .            | INTRNUCL         | KEC .       | REACTOME_ABCA_TRANSPOR   |
| 0 | 0 .            | NA . | .            | .                | .           | .                        |
| 0 | 0 .            | NA . | .            | .                | .           | .                        |
| 0 | 0 .            | NA . | .            | INTRG_PF .       | .           | REACTOME_SIGNALING_BY_G  |
| 0 | 0 .            | NA . | .            | .                | .           | .                        |
| 0 | 0 .            | NA . | .            | .                | .           | .                        |
| 0 | 0 .            | NA . | .            | .                | .           | REACTOME_GENERIC_TRANSI  |
| 0 | 0 .            | NA . | .            | .                | .           | .                        |
| 0 | 0 .            | NA . | .            | .                | .           | .                        |
| 0 | 0 .            | NA . | .            | INTRCARE .       | .           | .                        |
| 0 | 0 .            | NA . | SIGN .       | .                | .           | REACTOME_GASTRIN_CREB_5  |
| 0 | 0 .            | NA . | .            | .                | .           | REACTOME_DEVELOPMENTAL   |
| 0 | 0 Epileptic er | NA . | .            | CYT( .           | KEC PID.BIO | REACTOME_GASTRIN_CREB_5  |
| 0 | 0 .            | NA . | .            | .                | .           | REACTOME_FACTORS_INVOL\  |
| 0 | 0 .            | NA . | .            | .                | .           | .                        |
| 0 | 0 .            | NA . | .            | .                | .           | .                        |
| 0 | 0 .            | NA . | .            | .                | .           | .                        |
| 0 | 0 .            | NA . | CELL INTR .  | KEC .            | .           | .                        |
| 0 | 0 .            | NA . | .            | .                | .           | .                        |
| 0 | 0 .            | NA . | EST/INTRCATI | ( .              | .           | .                        |
| 0 | 0 .            | NA . | .            | CYT( .           | .           | .                        |
| 0 | 0 Bethlem m    | NA . | .            | .                | KEC PID .   | REACTOME_DEVELOPMENTAL   |
| 0 | 0 .            | NA . | .            | .                | .           | .                        |
| 0 | 0 .            | NA . | .            | .                | .           | .                        |
| 0 | 0 .            | NA . | .            | .                | .           | .                        |
| 0 | 0 .            | NA . | INOF .       | VOLT .           | .           | .                        |
| 0 | 0 .            | NA . | .            | .                | .           | .                        |
| 0 | 0 .            | NA . | SIGN NONKINA | ' .              | .           | .                        |
| 0 | 0 .            | NA . | .            | .                | .           | .                        |
| 0 | 0 .            | NA . | .            | .                | .           | .                        |
| 0 | 0 .            | NA . | GLY(CYT(TRAN | .                | .           | .                        |
| 0 | 0 .            | NA . | .            | .                | .           | .                        |
| 0 | 0 .            | NA . | .            | .                | .           | .                        |
| 0 | 0 .            | NA . | .            | .                | .           | .                        |
| 0 | 0 .            | NA . | PRO .        | KINA'KEC PID.BIO | .           | REACTOME_SIGNALLING_BY_I |
| 0 | 0 .            | NA . | .            | .                | .           | .                        |



|   |                |    |                |       |                              |
|---|----------------|----|----------------|-------|------------------------------|
| 0 | 0.             | NA | SIGN NUC DNA_  |       | REACTOME_PPARA_ACTIVATE      |
| 0 | 0 Neurofibro:  | NA | NUC NUC TRAN.  |       |                              |
| 0 | 0.             | NA |                |       |                              |
| 0 | 0.             | NA |                |       |                              |
| 0 | 0.             | NA |                |       |                              |
| 0 | 0.             | NA | TRAN           | KEC.  | REACTOME_O_LINKED_GLYCC      |
| 0 | 0.             | NA |                |       |                              |
| 0 | 0.             | NA |                |       |                              |
| 0 | 0.             | NA | SIGN CYT(CATI( | KEC.  | REACTOME_SIGNALLING_BY_I     |
| 0 | 0.             | NA |                |       |                              |
| 0 | 0.             | NA | PHOS           | KEC.  |                              |
| 0 | 0.             | NA | RNA.           | TRAN. | REACTOME_INTEGRATION_OF      |
| 0 | 0.             | NA |                |       |                              |
| 0 | 0.             | NA | MRN).          | PID.  | REACTOME_METABOLISM_OF_      |
| 0 | 0.             | NA |                |       |                              |
| 0 | 0 {Epilepsy, ( | NA | MUS MEM/ CATI( | KEC.  | REACTOME_DEVELOPMENTAL       |
| 0 | 0.             | NA | BIOF.          | NUCL. |                              |
| 0 | 0.             | NA |                |       |                              |
| 0 | 0.             | NA |                |       |                              |
| 0 | 0.             | NA | INTRG_PF.      |       |                              |
| 0 | 0.             | NA | MUS PRO.       | KEC.  | REACTOME_EXTRACELLULAR_      |
| 0 | 0.             | NA |                |       |                              |
| 0 | 0.             | NA |                |       |                              |
| 0 | 0.             | NA |                | PID.  | REACTOME_REGULATION_OF_      |
| 0 | 0.             | NA |                |       |                              |
| 0 | 0.             | NA |                |       |                              |
| 0 | 0.             | NA |                |       |                              |
| 0 | 0.             | NA |                |       |                              |
| 0 | 0.             | NA | CELI PRO1.     |       |                              |
| 0 | 0.             | NA | MAC.           |       | BIO( REACTOME_TRANSLATION;RE |
| 0 | 0.             | NA |                |       |                              |
| 0 | 0.             | NA | BIOF.          | KEC.  | BIO(                         |
| 0 | 0 Mental retc  | NA |                |       |                              |
| 0 | 0.             | NA |                | PID.  |                              |
| 0 | 0.             | NA | RNA.           | TRAN. |                              |
| 0 | 0.             | NA |                |       |                              |
| 0 | 0 Congenital   | NA | CI97 PAT.      |       |                              |
| 0 | 0 Hemophilic   | NA | REG.           | KEC.  | BIO( REACTOME_RESPONSE_TO_E  |
| 0 | 0.             | NA |                |       |                              |
| 0 | 0.             | NA |                |       |                              |



\_VITAMINS\_AND\_COFACTORS

DESCRIPTION;REACTOME\_RNA\_POL\_II\_TRANSCRIPTION\_PRE\_INITIATION\_AND\_PROMOTER\_  
\_CAPPED\_INTRON\_CONTAINING\_PRE\_MRNA;REACTOME\_MRNA\_PROCESSING;REACTOME\_  
ATIONS;REACTOME\_CYTOCHROME\_P450\_ARRANGED\_BY\_SUBSTRATE\_TYPE;REACTOME\_  
METABOLISM;REACTOME\_SYNTHESIS\_OF\_PE;REACTOME\_SYNTHESIS\_OF\_PC;REACTOME\_C

TORY\_INTERACTIONS\_BETWEEN\_A\_LYMPHOID\_AND\_A\_NON\_LYMPHOID\_CELL;REACTOME\_  
NSCRIPTION;REACTOME\_TRANSCRIPTION;REACTOME\_RNA\_POL\_I\_RNA\_POL\_III\_AND\_MITC  
\_LIPIDS\_AND\_LIPOPOTEINS;REACTOME\_CHOLESTEROL\_BIOSYNTHESIS

S;REACTOME\_IL1\_SIGNALING;REACTOME\_IMMUNE\_SYSTEM;REACTOME\_CYTOKINE\_SIGNA

\_PROTEINS;REACTOME\_POST\_TRANSLATIONAL\_PROTEIN\_MODIFICATION;REACTOME\_ASP

\_TRNA\_AMINOACYLATION;REACTOME\_TRNA\_AMINOACYLATION

PCR;REACTOME\_CLASS\_B\_2\_SECRETIN\_FAMILY\_RECEPTORS;REACTOME\_GPCR\_DOWNST

.NSCRIPTION\_AND\_TRANSLATION;REACTOME\_YAP1\_AND\_WWTR1\_TAZ\_STIMULATED\_GENI

\_NON\_CODING\_RNA;REACTOME\_ANTIVIRAL\_MECHANISM\_BY\_IFN\_STIMULATED\_GENES;RE

NGF;REACTOME\_DAG\_AND\_IP3\_SIGNALING;REACTOME\_SIGNALING\_BY\_ERBB2;REACTOME  
/NT;REACTOME\_SIGNALLING\_BY\_NGF;REACTOME\_CTNNB1\_PHOSPHORYLATION\_CASCADE

JATIONS;REACTOME\_GLUTATHIONE\_CONJUGATION;REACTOME\_PHASE\_II\_CONJUGATION

E\_TRANSPORT\_OF\_SMALL\_MOLECULES;REACTOME\_SLC\_MEDIATED\_TRANSMEMBRANE\_TI

ACTOME\_FORMATION\_OF\_THE\_TERNARY\_COMPLEX\_AND\_SUBSEQUENTLY\_THE\_43S\_COM

ME\_CELL\_CYCLE;REACTOME\_CHROMOSOME\_MAINTENANCE;REACTOME\_MEIOTIC\_SYNAP

\_AMINO\_ACIDS\_AND\_DERIVATIVES;REACTOME\_AMINE\_DERIVED\_HORMONES

ING\_AND\_TARGETTING\_OF\_GAG\_PROTEINS;REACTOME\_HIV\_INFECTION;REACTOME\_HIV\_I

MUNICATION;REACTOME\_EXTRACELLULAR\_MATRIX\_ORGANIZATION;REACTOME\_COLLAGE

NGF;REACTOME\_TRIF\_MEDIATED\_TLR3\_SIGNALING;REACTOME\_TCR\_SIGNALING;REACTOM

PCR;REACTOME\_OLFACTORY\_SIGNALING\_PATHWAY;REACTOME\_GPCR\_DOWNSTREAM\_S

CROSS\_CHEMICAL\_SYNAPSES;REACTOME\_NEURONAL\_SYSTEM;REACTOME\_AMINO\_ACID

JLFATE\_BIOSYNTHESIS;REACTOME\_CHONDROITIN\_SULFATE\_DERMATAN\_SULFATE\_METAE

ME\_CELL\_CYCLE;REACTOME\_CHROMOSOME\_MAINTENANCE;REACTOME\_MEIOTIC\_SYNAP

E\_TRANSPORT\_OF\_SMALL\_MOLECULES;REACTOME\_ION\_TRANSPORT\_BY\_P\_TYPE\_ATPAS

PCR;REACTOME\_GPCR\_DOWNSTREAM\_SIGNALING;REACTOME\_G\_ALPHA\_I\_SIGNALLING\_E

\_CAPPED\_INTRON\_CONTAINING\_PRE\_MRNA;REACTOME\_MRNA\_PROCESSING;REACTOME\_

CTOME\_CELL\_CYCLE\_MITOTIC;REACTOME\_RECRUITMENT\_OF\_MITOTIC\_CENTROSOME\_PI

NGF;REACTOME\_DAG\_AND\_IP3\_SIGNALING;REACTOME\_SIGNALING\_BY\_ERBB2;REACTOME

JATIONS;REACTOME\_XENOBIOTICS;REACTOME\_CYTOCHROME\_P450\_ARRANGED\_BY\_SUB:

JATIONS;REACTOME\_GLUTATHIONE\_CONJUGATION;REACTOME\_PHASE\_II\_CONJUGATION

VAYS;REACTOME\_ACTIVATION\_OF\_CHAPERONE\_GENES\_BY\_XBP1S;REACTOME\_UNFOLDE  
CRIPTION\_PATHWAY;REACTOME\_NUCLEAR\_RECEPTOR\_TRANSCRIPTION\_PATHWAY

\_INTRONLESS\_PRE\_MRNAS;REACTOME\_PROCESSING\_OF\_CAPPED\_INTRON\_CONTAINING\_  
THESIS;REACTOME\_HEPARAN\_SULFATE\_HEPARIN\_HS\_GAG\_METABOLISM;REACTOME\_GLY  
HO\_GTPASES;REACTOME\_SIGNALLING\_BY\_NGF;REACTOME\_NRAGE\_SIGNALS\_DEATH\_THF

NGF;REACTOME\_SIGNALING\_BY\_SCF\_KIT;REACTOME\_SIGNALING\_BY\_ERBB4;REACTOME\_S  
NGF;REACTOME\_SIGNALING\_BY\_SCF\_KIT;REACTOME\_SIGNALING\_BY\_ERBB4;REACTOME\_S

THE\_PRE\_REPLICATIVE\_COMPLEX;REACTOME\_CELL\_CYCLE;REACTOME\_ORC1\_REMOVAL\_  
EM;REACTOME\_VOLTAGE\_GATED\_POTASSIUM\_CHANNELS;REACTOME\_POTASSIUM\_CHAN

PCR;REACTOME\_GPCR\_DOWNSTREAM\_SIGNALING;REACTOME\_G\_ALPHA\_I\_SIGNALLING\_E  
\_BIOLOGY;REACTOME\_BMAL1\_CLOCK\_NPAS2\_ACTIVATES\_CIRCADIAN\_EXPRESSION;REAC

MUNICATION;REACTOME\_CELL\_EXTRACELLULAR\_MATRIX\_INTERACTIONS;REACTOME\_CEL

\_NUCLEOTIDES;REACTOME\_PURINE\_RIBONUCLEOSIDE\_MONOPHOSPHATE\_BIOSYNTHESIS  
\_BIOLOGY;REACTOME\_EXTRACELLULAR\_MATRIX\_ORGANIZATION;REACTOME\_COLLAGEN\_  
HO\_GTPASES;REACTOME\_SIGNALLING\_BY\_NGF;REACTOME\_NRAGE\_SIGNALS\_DEATH\_THF

NGF;REACTOME\_SIGNALING\_BY\_SCF\_KIT;REACTOME\_CELL\_CELL\_COMMUNICATION;REAC  
/ED\_IN\_MEGAKARYOCYTE\_DEVELOPMENT\_AND\_PLATELET\_PRODUCTION;REACTOME\_HEM

DATIONS;REACTOME\_PHASE1\_FUNCTIONALIZATION\_OF\_COMPOUNDS;REACTOME\_ETHANC



/ED\_IN\_MEGAKARYOCYTE\_DEVELOPMENT\_AND\_PLATELET\_PRODUCTION;REACTOME\_HEM  
.NSCRIPTION\_AND\_TRANSLATION;REACTOME\_PRE\_NOTCH\_EXPRESSION\_AND\_PROCESSI

EM;REACTOME\_TANDEM\_PORE\_DOMAIN\_POTASSIUM\_CHANNELS;REACTOME\_POTASSIUM  
JLFATE\_DERMATAN\_SULFATE\_METABOLISM;REACTOME\_GLYCOSAMINOGLYCAN\_METABOI

E\_TRANSPORT\_OF\_SMALL\_MOLECULES;REACTOME\_SLC\_MEDIATED\_TRANSMEMBRANE\_TI

·FICKING;REACTOME\_MEMBRANE\_BINDING\_AND\_TARGETTING\_OF\_GAG\_PROTEINS;REACT

E\_TRANSPORT\_OF\_SMALL\_MOLECULES;REACTOME\_SLC\_MEDIATED\_TRANSMEMBRANE\_TI

NGF;REACTOME\_SIGNALLING\_TO\_RAS;REACTOME\_NGF\_SIGNALLING\_VIA\_TRKA\_FROM\_TH  
CROSS\_CHEMICAL\_SYNAPSES;REACTOME\_NEURONAL\_SYSTEM  
\_STEROID\_HORMONES\_AND\_VITAMINS\_A\_AND\_D;REACTOME\_HDL\_MEDIATED\_LIPID\_TRAN

\_PROTEIN\_IMPORT;REACTOME\_METABOLISM\_OF\_PROTEINS

E\_TRANSPORT\_OF\_SMALL\_MOLECULES;REACTOME\_AQUAPORIN\_MEDIATED\_TRANSPORT;

OSYLATION\_OF\_MUCINS;REACTOME\_TERMINATION\_OF\_O\_GLYCAN\_BIOSYNTHESIS;REACTO  
OSYLATION\_OF\_MUCINS;REACTOME\_TERMINATION\_OF\_O\_GLYCAN\_BIOSYNTHESIS;REACTO

THESIS;REACTOME\_HEPARAN\_SULFATE\_HEPARIN\_HS\_GAG\_METABOLISM;REACTOME\_GLY

CEPTOR\_INTERACTIONS;REACTOME\_RESPONSE\_TO\_ELEVATED\_PLATELET\_CYTOSOLIC\_C  
WAYS;REACTOME\_ACTIVATION\_OF\_CHAPERONE\_GENES\_BY\_XBP1S;REACTOME\_UNFOLDE  
NTIGEN\_PRESENTATION;REACTOME\_FACTORS\_INVOLVED\_IN\_MEGAKARYOCYTE\_DEVELOP

HO\_GTPASES

HO\_GTPASES

PCR;REACTOME\_OLFACTORY\_SIGNALING\_PATHWAY;REACTOME\_GPCR\_DOWNSTREAM\_S

ON\_OF\_HOMO\_SAPIENS\_WITH\_MYCOBACTERIUM\_TUBERCULOSIS;REACTOME\_NITRIC\_OXII  
\_BIOLOGY;REACTOME\_NOTCH1\_INTRACELLULAR\_DOMAIN\_REGULATES\_TRANSCRIPTION;I  
TLR3\_SIGNALING;REACTOME\_RIP\_MEDIATED\_NFKB\_ACTIVATION\_VIA\_DAI;REACTOME\_APO

;REACTOME\_ADAPTIVE\_IMMUNE\_SYSTEM;REACTOME\_CLASS\_I\_MHC\_MEDIATED\_ANTIGEN

PCR;REACTOME\_OLFACTORY\_SIGNALING\_PATHWAY;REACTOME\_GPCR\_DOWNSTREAM\_S

E\_TRANSPORT\_OF\_SMALL\_MOLECULES;REACTOME\_SLC\_MEDIATED\_TRANSMEMBRANE\_T

.BIOLOGY;REACTOME\_AXON\_GUIDANCE;REACTOME\_MYOGENESIS;REACTOME\_NETRIN1\_

E\_TRANSPORT\_OF\_SMALL\_MOLECULES;REACTOME\_SLC\_MEDIATED\_TRANSMEMBRANE\_T

PHA\_BETA\_SIGNALING;REACTOME\_INTERFERON\_SIGNALING;REACTOME\_IMMUNE\_SYSTEM  
COMMUNICATION;REACTOME\_CELL\_CELL\_JUNCTION\_ORGANIZATION;REACTOME\_TIGHT\_JUNC

G;REACTOME\_POST\_CHAPERONIN\_TUBULIN\_FOLDING\_PATHWAY;REACTOME\_METABOLIS

\_AMINO\_ACIDS\_AND\_DERIVATIVES

NEUROTRANSMITTER\_RELEASE\_CYCLE;REACTOME\_TRANSMISSION\_ACROSS\_CHEMICAL\_SYN

PCR;REACTOME\_PEPTIDE\_LIGAND\_BINDING\_RECEPTORS;REACTOME\_CLASS\_A1\_RHODOP

CTIONS;REACTOME\_PHASE1\_FUNCTIONALIZATION\_OF\_COMPOUNDS;REACTOME\_ETHANOL  
Oxidation;REACTOME\_PHASE1\_FUNCTIONALIZATION\_OF\_COMPOUNDS;REACTOME\_ETHANOL

.\_BIOLOGY;REACTOME\_PPARA\_ACTIVATES\_GENE\_EXPRESSION;REACTOME\_GENERIC\_TRAFFICKING

.\_BIOLOGY;REACTOME\_AXON\_GUIDANCE;REACTOME\_L1CAM\_INTERACTIONS  
HO\_GTPASES;REACTOME\_MEMBRANE\_TRAFFICKING;REACTOME\_TRANS\_GOLGI\_NETWORK

;REACTOME\_ADAPTIVE\_IMMUNE\_SYSTEM;REACTOME\_CLASS\_I\_MHC\_MEDIATED\_ANTIGEN

.\_BIOLOGY;REACTOME\_SIGNALING\_BY\_NODAL  
PCR;REACTOME\_OLFACTORY\_SIGNALING\_PATHWAY;REACTOME\_GPCR\_DOWNSTREAM\_S

\_NUCLEOTIDES;REACTOME\_PURINE\_RIBONUCLEOSIDE\_MONOPHOSPHATE\_BIOSYNTHESIS

/ED\_IN\_MEGAKARYOCYTE\_DEVELOPMENT\_AND\_PLATELET\_PRODUCTION;REACTOME\_KINI  
/ED\_IN\_MEGAKARYOCYTE\_DEVELOPMENT\_AND\_PLATELET\_PRODUCTION;REACTOME\_KINI  
{CROSS\_CHEMICAL\_SYNAPSES;REACTOME\_NEURONAL\_SYSTEM

.\_BIOLOGY;REACTOME\_AXON\_GUIDANCE;REACTOME\_SIGNALING\_BY\_ROBO\_RECEPTOR  
IETABOLISM;REACTOME\_GASTRIN\_CREB\_SIGNALLING\_PATHWAY\_VIA\_PKC\_AND\_MAPK;RE

NGF;REACTOME\_SIGNALING\_BY\_SCF\_KIT;REACTOME\_CELL\_CELL\_COMMUNICATION;REAC  
NGF;REACTOME\_SIGNALING\_BY\_SCF\_KIT;REACTOME\_CELL\_CELL\_COMMUNICATION;REAC

SIGNALLING\_PATHWAY\_VIA\_PKC\_AND\_MAPK;REACTOME\_SIGNALING\_BY\_GPCR;REACTOME

SSING\_CROSS\_PRESENTATION;REACTOME\_ENDOSOMAL\_VACUOLAR\_PATHWAY;REACTOME  
TRANSCRIPTION;REACTOME\_TRANSCRIPTION;REACTOME\_RNA\_POL\_I\_RNA\_POL\_III\_AND\_MITOCHONDRION  
TRANSCRIPTION\_PATHWAY;REACTOME\_NUCLEAR\_RECEPTOR\_TRANSCRIPTION\_PATHWAY  
REGULATION\_OF\_GENE\_EXPRESSION;REACTOME\_METABOLISM\_OF\_LIPIDS\_AND\_LIPOPROTEINS;REACTOME  
OXIDATION;REACTOME\_GLUTATHIONE\_CONJUGATION;REACTOME\_PHASE\_II\_CONJUGATION  
EXTRACELLULAR\_MATRIX\_ORGANIZATION;REACTOME\_COLLAGEN\_FORMATION

CELL\_BIOLOGY;REACTOME\_REGULATION\_OF\_BETA\_CELL\_DEVELOPMENT;REACTOME\_REGULATION

OF\_CROSS\_CHEMICAL\_SYNAPSES;REACTOME\_NEURONAL\_SYSTEM;REACTOME\_SIGNALING\_EFFECTORS  
METABOLISM\_AND\_CITRIC\_ACID\_TCA\_CYCLE;REACTOME\_TCA\_CYCLE\_AND\_RESPIRATORY\_ELECTRON

TRANSPORTER\_INTERACTIONS\_AT\_THE\_VASCULAR\_WALL;REACTOME\_TIE2\_SIGNALING;REACTOME\_HEMOGLOBIN

TRANSPORT\_OF\_SMALL\_MOLECULES;REACTOME\_SLC\_MEDIATED\_TRANSMEMBRANE\_TRANSPORTER  
CELL\_BIOLOGY;REACTOME\_NEURONAL\_SYSTEM;REACTOME\_AXON\_GUIDANCE;REACTOME\_LIPID

E\_TRANSPORT\_OF\_SMALL\_MOLECULES;REACTOME\_SLC\_MEDIATED\_TRANSMEMBRANE\_T

\_BIOLOGY;REACTOME\_TRANSMISSION\_ACROSS\_CHEMICAL\_SYNAPSES;REACTOME\_NEUR

LEVATED\_PLATELET\_CYTOSOLIC\_CA2\_;REACTOME\_MUSCLE\_CONTRACTION;REACTOME\_

E\_TRANSPORT\_OF\_SMALL\_MOLECULES;REACTOME\_AQUAPORIN\_MEDIATED\_TRANSPORT;

NGF;REACTOME\_SIGNALING\_BY\_SCF\_KIT;REACTOME\_DEVELOPMENTAL\_BIOLOGY;REACTC  
NGF;REACTOME\_DAG\_AND\_IP3\_SIGNALING;REACTOME\_SIGNALING\_BY\_ERBB2;REACTOME  
VAYS;REACTOME\_ACTIVATION\_OF\_CHAPERONE\_GENES\_BY\_XBP1S;REACTOME\_UNFOLDE

FICKING;REACTOME\_TRANS\_GOLGI\_NETWORK\_VESICLE\_BUDDING;REACTOME\_GOLGI\_AS



CROSS\_CHEMICAL\_SYNAPSES;REACTOME\_NEURONAL\_SYSTEM;REACTOME\_NEUROTRAN

BOLISM\_AND\_CITRIC\_ACID\_TCA\_CYCLE;REACTOME\_TCA\_CYCLE\_AND\_RESPIRATORY\_ELE

\_PATHWAY;REACTOME\_DNA\_REPAIR

SIGNALLING\_PATHWAY\_VIA\_PKC\_AND\_MAPK;REACTOME\_SIGNALING\_BY\_GPCR;REACTOME  
TOTHENATE\_METABOLISM;REACTOME\_METABOLISM\_OF\_VITAMINS\_AND\_COFACTORS;REA

VAYS;REACTOME\_PERK\_REGULATED\_GENE\_EXPRESSION;REACTOME\_ACTIVATION\_OF\_GE  
.COUPLED\_NER\_TC\_NER;REACTOME\_NUCLEOTIDE\_EXCISION\_REPAIR;REACTOME\_FORMA  
\_PROTEIN\_IMPORT;REACTOME\_METABOLISM\_OF\_PROTEINS

.\_BIOLOGY;REACTOME\_AXON\_GUIDANCE;REACTOME\_NCAM\_SIGNALING\_FOR\_NEURITE\_OI  
VAYS;REACTOME\_PERK\_REGULATED\_GENE\_EXPRESSION;REACTOME\_ACTIVATION\_OF\_GE

MODELLING\_OF\_PI;REACTOME\_ACYL\_CHAIN\_REMODELLING\_OF\_PC;REACTOME\_PHOSPHO  
\_AMINO\_ACIDS\_AND\_DERIVATIVES;REACTOME\_GLYCOPROTEIN\_HORMONES;REACTOME\_F

NGF;REACTOME\_DAG\_AND\_IP3\_SIGNALING;REACTOME\_SIGNALING\_BY\_ERBB2;REACTOME  
CRIPTION\_PATHWAY

THE\_PRE\_REPLICATIVE\_COMPLEX;REACTOME\_CELL\_CYCLE;REACTOME\_ORC1\_REMOVAL\_

REACTOME\_GENERATION\_OF\_SECOND\_MESSENGER\_MOLECULES;REACTOME\_IMMUNE\_S'

IPPO

OSYLATION\_OF\_MUCINS;REACTOME\_METABOLISM\_OF\_PROTEINS;REACTOME\_POST\_TRAN

HO\_GTPASES;REACTOME\_SIGNALLING\_BY\_NGF;REACTOME\_NRAGE\_SIGNALS\_DEATH\_THF  
\_LIPIDS\_AND\_LIPOPROTEINS;REACTOME\_CHOLESTEROL\_BIOSYNTHESIS

;REACTOME\_ADAPTIVE\_IMMUNE\_SYSTEM;REACTOME\_CLASS\_I\_MHC\_MEDIATED\_ANTIGEN

\_MATRIX\_ORGANIZATION;REACTOME\_COLLAGEN\_FORMATION

MUNICATION;REACTOME\_CELL\_CELL\_JUNCTION\_ORGANIZATION;REACTOME\_TIGHT\_JUNC

TEINS\_MEDIATED\_TRANSPORT;REACTOME\_TRANSMEMBRANE\_TRANSPORT\_OF\_SMALL\_M

ATION\_OF\_SOLUBLE\_EXOGENOUS\_ANTIGENS\_ENDOSOMES;REACTOME\_ANTIGEN\_PROCE

HO\_GTPASES;REACTOME\_SIGNALLING\_BY\_NGF;REACTOME\_NRAGE\_SIGNALS\_DEATH\_THF

HO\_GTPASES;REACTOME\_SIGNALLING\_BY\_NGF;REACTOME\_NRAGE\_SIGNALS\_DEATH\_THF  
SCRIPTION\_TERMINATION;REACTOME\_RNA\_POL\_I\_TRANSCRIPTION;REACTOME\_TRANSCF  
\_NUCLEOTIDES;REACTOME\_PYRIMIDINE\_METABOLISM

NSPORT\_ACROSS\_THE\_PLASMA\_MEMBRANE;REACTOME\_TRANSMEMBRANE\_TRANSPORT  
NSPORT\_ACROSS\_THE\_PLASMA\_MEMBRANE;REACTOME\_TRANSMEMBRANE\_TRANSPORT  
HO\_GTPASES

HO\_GTPASES

E\_TRANSPORT\_OF\_SMALL\_MOLECULES;REACTOME\_SLC\_MEDIATED\_TRANSMEMBRANE\_TI  
SCRIPTION\_TERMINATION;REACTOME\_RNA\_POL\_I\_TRANSCRIPTION;REACTOME\_TRANSCF

NSCRIPTION\_INITIATION\_FROM\_TYPE\_2\_PROMOTER;REACTOME\_RNA\_POL\_III\_TRANSCRIP  
\_AMINO\_ACIDS\_AND\_DERIVATIVES

ELLULAR\_DOMAIN\_REGULATES\_TRANSCRIPTION;REACTOME\_SIGNALING\_BY\_NOTCH1;REA  
/ED\_IN\_MEGAKARYOCYTE\_DEVELOPMENT\_AND\_PLATELET\_PRODUCTION;REACTOME\_HEM

PCR;REACTOME\_CLASS\_B\_2\_SECRETIN\_FAMILY\_RECEPTORS;REACTOME\_GPCR\_LIGAND\_

REPAIR;REACTOME\_RESOLUTION\_OF\_AP\_SITES\_VIA\_THE\_MULTIPLE\_NUCLEOTIDE\_PATCH  
REPAIR;REACTOME\_RESOLUTION\_OF\_AP\_SITES\_VIA\_THE\_MULTIPLE\_NUCLEOTIDE\_PATCH  
E\_TRANSPORT\_OF\_SMALL\_MOLECULES;REACTOME\_ION\_TRANSPORT\_BY\_P\_TYPE\_ATPAS

ME\_CELL\_CYCLE;REACTOME\_CELL\_CYCLE\_CHECKPOINTS;REACTOME\_REGULATION\_OF\_T  
PCR;REACTOME\_CLASS\_A1\_RHODOPSIN\_LIKE\_RECEPTORS;REACTOME\_P2Y\_RECEPTORS

\_BIOLOGY;REACTOME\_REGULATION\_OF\_BETA\_CELL\_DEVELOPMENT;REACTOME\_REGULA

CTOME\_CELL\_CYCLE\_MITOTIC;REACTOME\_CELL\_CYCLE\_CHECKPOINTS;REACTOME\_TRAN

CRPTION\_PATHWAY

E\_TRANSPORT\_OF\_SMALL\_MOLECULES;REACTOME\_SLC\_MEDIATED\_TRANSMEMBRANE\_T  
\_BIOLOGY;REACTOME\_BMAL1\_CLOCK\_NPAS2\_ACTIVATES\_CIRCADIAN\_EXPRESSION;REAC

\_MATRIX\_ORGANIZATION;REACTOME\_COLLAGEN\_FORMATION

^STIMULATES\_GUANYLATE\_CYCLASE;REACTOME\_PLATELET\_HOMEOSTASIS;REACTOME\_HEM

ONE\_RECEPTOR\_SIGNALING;REACTOME\_SIGNALING\_BY\_ERBB4;REACTOME\_PROLACTIN\_R

SCRIPTION\_TERMINATION;REACTOME\_RNA\_POL\_I\_TRANSCRIPTION;REACTOME\_RNA\_POL

IPID\_METABOLISM;REACTOME\_PHOSPHOLIPID\_METABOLISM;REACTOME\_CS\_DS\_DEGRAD.  
IPID\_METABOLISM;REACTOME\_PHOSPHOLIPID\_METABOLISM;REACTOME\_CS\_DS\_DEGRAD.  
BILE\_SALT\_METABOLISM;REACTOME\_SYNTHESIS\_OF\_BILE\_ACIDS\_AND\_BILE\_SALTS\_VIA\_7,  
^\_AMINOACYLATION;REACTOME\_TRNA\_AMINOACYLATION  
^\_AMINOACYLATION;REACTOME\_TRNA\_AMINOACYLATION

E\_TRANSPORT\_OF\_SMALL\_MOLECULES;REACTOME\_ION\_CHANNEL\_TRANSPORT;REACTOM  
\_BIOLOGY;REACTOME\_TRANSCRIPTIONAL\_REGULATION\_OF\_WHITE\_ADIPOCYTE\_DIFFERE

ME\_CELL\_CYCLE;REACTOME\_RNA\_POL\_I\_TRANSCRIPTION;REACTOME\_TRANSCRIPTION;R

WAY\_FOR\_APOPTOSIS;REACTOME\_DEVELOPMENTAL\_BIOLOGY;REACTOME\_TRANSCRIPTI

\_STEROID\_HORMONES\_AND\_VITAMINS\_A\_AND\_D;REACTOME\_BIOLOGICAL\_OXIDATIONS;RI

\_TRNA\_AMINOACYLATION;REACTOME\_TRNA\_AMINOACYLATION

;TOME\_BETA\_DEFENSINS;REACTOME\_INNATE\_IMMUNE\_SYSTEM;REACTOME\_IMMUNE\_SYS

OSYLATION\_OF\_MUCINS;REACTOME\_METABOLISM\_OF\_PROTEINS;REACTOME\_POST\_TRAN

TES\_B\_CELL\_RECEPTOR\_LEADING\_TO\_GENERATION\_OF\_SECOND\_MESSENGERS;REACTC

EFICKING;REACTOME\_ENDOSOMAL\_SORTING\_COMPLEX\_REQUIRED\_FOR\_TRANSPORT\_ES  
RBB4;REACTOME\_DOWNREGULATION\_OF\_ERBB2\_ERBB3\_SIGNALING;REACTOME\_SIGNALII

OR\_RECYCLING;REACTOME\_NEF\_MEDIATES\_DOWN\_MODULATION\_OF\_CELL\_SURFACE\_RE  
ME\_CELL\_CYCLE;REACTOME\_CHROMOSOME\_MAINTENANCE;REACTOME\_MEIOTIC\_SYNAP  
CELLULAR\_DOMAIN\_REGULATES\_TRANSCRIPTION;REACTOME\_SIGNALING\_BY\_NOTCH1;REA

)\_IRF7\_ACTIVATION;REACTOME\_FACTORS\_INVOLVED\_IN\_MEGAKARYOCYTE\_DEVELOPME

ELLULAR\_DOMAIN\_REGULATES\_TRANSCRIPTION;REACTOME\_SIGNALING\_BY\_NOTCH1;REA

NGF;REACTOME\_ARMS\_MEDIATED\_ACTIVATION;REACTOME\_PROLONGED\_ERK\_ACTIVATIO

\_MRNA;REACTOME\_METABOLISM\_OF\_RNA;REACTOME\_NONSENSE\_MEDIATED\_DECAY\_ENI

\_BIOLOGY;REACTOME\_REGULATION\_OF\_APOPTOSIS;REACTOME\_AXON\_GUIDANCE;REAC  
\_BIOLOGY;REACTOME\_REGULATION\_OF\_APOPTOSIS;REACTOME\_AXON\_GUIDANCE;REAC

NTIGEN\_PRESENTATION;REACTOME\_FACTORS\_INVOLVED\_IN\_MEGAKARYOCYTE\_DEVELOP

)SYLATION\_OF\_MUCINS;REACTOME\_TERMINATION\_OF\_O\_GLYCAN\_BIOSYNTHESIS;REACTO

:CEPTOR\_INTERACTIONS;REACTOME\_RESPONSE\_TO\_ELEVATED\_PLATELET\_CYTOSOLIC\_C



.\_BIOLOGY;REACTOME\_AXON\_GUIDANCE;REACTOME\_NCAM1\_INTERACTIONS;REACTOME\_

CTOME\_GLUCCONEOGENESIS;REACTOME\_METABOLISM\_OF\_CARBOHYDRATES;REACTOME  
CTOME\_GLUCCONEOGENESIS;REACTOME\_METABOLISM\_OF\_CARBOHYDRATES;REACTOME  
\_TRAFFICKING;REACTOME\_TRANS\_GOLGI\_NETWORK\_VESICLE\_BUDDING;REACTOME\_GOLGI\_AS  
WAYS;REACTOME\_ACTIVATION\_OF\_CHAPERONE\_GENES\_BY\_XBP1S;REACTOME\_UNFOLDE

\_STEROID\_HORMONES\_AND\_VITAMINS\_A\_AND\_D;REACTOME\_BIOLOGICAL\_OXIDATIONS;RI  
\_STEROID\_HORMONES\_AND\_VITAMINS\_A\_AND\_D;REACTOME\_BIOLOGICAL\_OXIDATIONS;RI

\_E\_CONTRACTION;REACTOME\_MUSCLE\_CONTRACTION

.\_BIOLOGY;REACTOME\_PPARA\_ACTIVATES\_GENE\_EXPRESSION;REACTOME\_METABOLISM  
/MODELLING\_OF\_PI;REACTOME\_ACYL\_CHAIN\_REMODELLING\_OF\_PC;REACTOME\_PHOSPHO

/ED\_IN\_MEGAKARYOCYTE\_DEVELOPMENT\_AND\_PLATELET\_PRODUCTION;REACTOME\_HEM

PTERIN\_BH4\_SYNTHESIS\_RECYCLING\_SALVAGE\_AND\_REGULATION;REACTOME\_ENOS\_AC

CTOME\_CELL\_CYCLE\_MITOTIC;REACTOME\_CYCLIN\_E\_ASSOCIATED\_EVENTS\_DURING\_G1\_  
CTOME\_CELL\_CYCLE\_MITOTIC;REACTOME\_CYCLIN\_E\_ASSOCIATED\_EVENTS\_DURING\_G1\_

\_STEROID\_HORMONES\_AND\_VITAMINS\_A\_AND\_D;REACTOME\_TRAFFICKING\_AND\_PROCES

;REACTOME\_ADAPTIVE\_IMMUNE\_SYSTEM;REACTOME\_CLASS\_I\_MHC\_MEDIATED\_ANTIGEN

\_BIOLOGY;REACTOME\_AXON\_GUIDANCE;REACTOME\_NCAM\_SIGNALING\_FOR\_NEURITE\_OI

ACTOME\_FORMATION\_OF\_THE\_TERNARY\_COMPLEX\_AND\_SUBSEQUENTLY\_THE\_43S\_COM

NGF;REACTOME\_SIGNALING\_BY\_SCF\_KIT;REACTOME\_DEVELOPMENTAL\_BIOLOGY;REACTC  
NGF;REACTOME\_NGF\_SIGNALLING\_VIA\_TRKA\_FROM\_THE\_PLASMA\_MEMBRANE

ICROSS\_CHEMICAL\_SYNAPSES;REACTOME\_NEURONAL\_SYSTEM;REACTOME\_NEUROTRAN

NGF;REACTOME\_DEVELOPMENTAL\_BIOLOGY;REACTOME\_TRIF\_MEDIATED\_TLR3\_SIGNALIN

\_MRNA;REACTOME\_METABOLISM\_OF\_RNA;REACTOME\_NONSENSE\_MEDIATED\_DECAY\_ENI  
OR\_SIGNALLING\_CASCADE;REACTOME\_PKB\_MEDIATED\_EVENTS;REACTOME\_SIGNALING\_E  
NSCRIPTION\_INITIATION\_FROM\_TYPE\_2\_PROMOTER;REACTOME\_RNA\_POL\_III\_TRANSCRIP

INTERACTIONS\_AT\_THE\_VASCULAR\_WALL;REACTOME\_INTEGRIN\_CELL\_SURFACE\_INTERA

\_TRIC\_CCT\_WITH\_TARGET\_PROTEINS\_DURING\_BIOSYNTHESIS;REACTOME\_PROTEIN\_FOL

;CYTOSOLIC\_CA2\_LEVELS;REACTOME\_PLATELET\_HOMEOSTASIS;REACTOME\_PLATELET\_CA

\_BIOLOGY;REACTOME\_PPARA\_ACTIVATES\_GENE\_EXPRESSION;REACTOME\_RORA\_ACTIVATES

HO\_GTPASES

LIPOSYNTHESIS;REACTOME\_FATTY\_ACYL\_COA\_BIOSYNTHESIS;REACTOME\_INTEGRATION\_O

\_BIOLOGY;REACTOME\_BMAL1\_CLOCK\_NPAS2\_ACTIVATES\_CIRCADIAN\_EXPRESSION;REACTOME

GLUCOSE\_TRANSPORT\_OF\_SMALL\_MOLECULES;REACTOME\_SLC\_MEDIATED\_TRANSMEMBRANE\_T

\_BIOLOGY;REACTOME\_AXON\_GUIDANCE;REACTOME\_NCAM1\_INTERACTIONS;REACTOME

TRANSCRIPTION;REACTOME\_MRNA\_CAPPING;REACTOME\_MRNA\_PROCESSING;REACTOME\_TR

\_BIOLOGY;REACTOME\_MYOGENESIS

GLUCOSE\_TRANSPORT\_OF\_SMALL\_MOLECULES;REACTOME\_ION\_TRANSPORT\_BY\_P\_TYPE\_ATPASES

HO\_GTPASES  
HO\_GTPASES  
\_BIOLOGY;REACTOME\_MYOGENESIS  
\_BIOLOGY;REACTOME\_MYOGENESIS

\_BIOLOGY;REACTOME\_PPARA\_ACTIVATES\_GENE\_EXPRESSION;REACTOME\_METABOLISM\_

OSYLATION\_OF\_MUCINS;REACTOME\_TERMINATION\_OF\_O\_GLYCAN\_BIOSYNTHESIS;REACTO  
OSYLATION\_OF\_MUCINS;REACTOME\_TERMINATION\_OF\_O\_GLYCAN\_BIOSYNTHESIS;REACTO  
OSYLATION\_OF\_MUCINS;REACTOME\_TERMINATION\_OF\_O\_GLYCAN\_BIOSYNTHESIS;REACTO  
OSYLATION\_OF\_MUCINS;REACTOME\_TERMINATION\_OF\_O\_GLYCAN\_BIOSYNTHESIS;REACTO

SCRIPTION\_PATHWAY

MAD4\_HETEROTRIMER\_REGULATES\_TRANSCRIPTION;REACTOME\_TRANSCRIPTIONAL\_ACTI

\_AMINO\_ACIDS\_AND\_DERIVATIVES;REACTOME\_AMINE\_DERIVED\_HORMONES;REACTOME\_

NGF;REACTOME\_P75\_NTR\_RECEPTOR\_MEDIATED\_SIGNALLING;REACTOME\_SIGNALING\_BY  
CROSS\_CHEMICAL\_SYNAPSES;REACTOME\_NEURONAL\_SYSTEM;REACTOME\_NEUROTRAN  
CROSS\_CHEMICAL\_SYNAPSES;REACTOME\_NEURONAL\_SYSTEM;REACTOME\_NEUROTRAN

\_PROTEINS;REACTOME\_POST\_TRANSLATIONAL\_MODIFICATION\_SYNTHESIS\_OF\_GPI\_ANCH  
\_PROTEINS;REACTOME\_POST\_TRANSLATIONAL\_MODIFICATION\_SYNTHESIS\_OF\_GPI\_ANCH

SCRIPTION\_PATHWAY

MUNICATION;REACTOME\_SIGNAL\_REGULATORY\_PROTEIN\_SIRP\_FAMILY\_INTERACTIONS

SIGNALLING\_PATHWAY\_VIA\_PKC\_AND\_MAPK;REACTOME\_TRANSMISSION\_ACROSS\_CHEMIK

S;REACTOME\_REGULATION\_OF\_SIGNALING\_BY\_CBL;REACTOME\_IL\_3\_5\_AND\_GM-CSF\_SIC  
\_BIOLOGY;REACTOME\_BMAL1\_CLOCK\_NPAS2\_ACTIVATES\_CIRCADIAN\_EXPRESSION;REAC  
\_BIOLOGY;REACTOME\_BMAL1\_CLOCK\_NPAS2\_ACTIVATES\_CIRCADIAN\_EXPRESSION;REAC

ACID\_METABOLISM;REACTOME\_METABOLISM\_OF\_AMINO\_ACIDS\_AND\_DERIVATIVES

\_AMINO\_ACIDS\_AND\_DERIVATIVES

RESSION\_AND\_PROCESSING;REACTOME\_PRE\_NOTCH\_PROCESSING\_IN\_GOLGI;REACTOM

\_BIOLOGY;REACTOME\_BMAL1\_CLOCK\_NPAS2\_ACTIVATES\_CIRCADIAN\_EXPRESSION;REAC  
:S\_GENE\_EXPRESSION;REACTOME\_METABOLISM\_OF\_LIPIDS\_AND\_LIPOPROTEINS;REACTC  
ME\_CELL\_CYCLE;REACTOME\_CHROMOSOME\_MAINTENANCE;REACTOME\_MEIOTIC\_SYNAP.

D\_PROCESSING\_OF\_ENDOSOMAL\_TLR;REACTOME\_TRAF6\_MEDIATED\_INDUCION\_OF\_NF  
D\_PROCESSING\_OF\_ENDOSOMAL\_TLR;REACTOME\_TRAF6\_MEDIATED\_INDUCION\_OF\_NF  
\_E\_CONTRACTION;REACTOME\_MUSCLE\_CONTRACTION  
ATIONS;REACTOME\_TRANSMISSION\_ACROSS\_CHEMICAL\_SYNAPSES;REACTOME\_NEUROI

\_RESPIRATORY\_ELECTRON\_TRANSPORT;REACTOME\_RESPIRATORY\_ELECTRON\_TRANSP  
\_BIOLOGY;REACTOME\_PPARA\_ACTIVATES\_GENE\_EXPRESSION;REACTOME\_GENERIC\_TRA

HO\_GTPASES;REACTOME\_SIGNALLING\_BY\_NGF;REACTOME\_CELL\_CELL\_COMMUNICATION

AVAGE\_OF\_CELLULAR\_PROTEINS;REACTOME\_APOPTOSIS;REACTOME\_APOPTOTIC\_EXECU

PHA\_BETA\_SIGNALING;REACTOME\_INTERFERON\_SIGNALING;REACTOME\_IMMUNE\_SYSTEM

.\_BIOLOGY;REACTOME\_TCR\_SIGNALING;REACTOME\_GENERATION\_OF\_SECOND\_MESSENG

HE\_PROTEOLYTIC\_ACTIVITY\_OF\_APC\_C\_REQUIRED\_FOR\_THE\_ONSET\_OF\_ANAPHASE\_BY\_

\_PROTEIN\_IMPORT;REACTOME\_GLYCOGENOGENESIS;REACTOME\_METABOLISM\_OF\_PROTE  
;REACTOME\_ADAPTIVE\_IMMUNE\_SYSTEM;REACTOME\_CLASS\_I\_MHC\_MEDIATED\_ANTIGEN

SIGNALLING\_PATHWAY\_VIA\_PKC\_AND\_MAPK;REACTOME\_SIGNALING\_BY\_GPCR;REACTOME  
E\_TRANSPORT\_OF\_SMALL\_MOLECULES;REACTOME\_SLC\_MEDIATED\_TRANSMEMBRANE\_TI  
E\_TRANSPORT\_OF\_SMALL\_MOLECULES;REACTOME\_SLC\_MEDIATED\_TRANSMEMBRANE\_TI

CRPTION\_PATHWAY

.\_BIOLOGY;REACTOME\_AXON\_GUIDANCE;REACTOME\_ACTIVATION\_OF\_RAC;REACTOME\_SI

NSPORT\_ACROSS\_THE\_PLASMA\_MEMBRANE;REACTOME\_TRANSMEMBRANE\_TRANSPORT

\_MATRIX\_ORGANIZATION;REACTOME\_COLLAGEN\_FORMATION

\_MATRIX\_ORGANIZATION;REACTOME\_COLLAGEN\_FORMATION

ME\_CELL\_CYCLE;REACTOME\_CHROMOSOME\_MAINTENANCE;REACTOME\_MEIOTIC\_SYNAP:

NOTCH1\_TRANSMITS\_SIGNAL\_TO\_THE\_NUCLEUS;REACTOME\_SIGNALING\_BY\_NOTCH1;REACTO

MODIFICATIONS;REACTOME\_GLUTATHIONE\_CONJUGATION;REACTOME\_PHASE\_II\_CONJUGATION

VEGF;REACTOME\_SIGNALING\_BY\_SCF\_KIT;REACTOME\_SIGNALING\_BY\_ERBB4;REACTOME\_S

ERBB4;REACTOME\_DOWNREGULATION\_OF\_ERBB2\_ERBB3\_SIGNALING;REACTOME\_SIGNALING  
DNA\_REPAIR;REACTOME\_RESOLUTION\_OF\_AP\_SITES\_VIA\_THE\_MULTIPLE\_NUCLEOTIDE\_PATCH



SIGNALLING\_PATHWAY\_VIA\_PKC\_AND\_MAPK;REACTOME\_SIGNALING\_BY\_GPCR;REACTOME  
\_AMINO\_ACIDS\_AND\_DERIVATIVES

BILE\_SALT\_METABOLISM;REACTOME\_SYNTHESIS\_OF\_BILE\_ACIDS\_AND\_BILE\_SALTS\_VIA\_7,

CTOME\_CELL\_CYCLE\_MITOTIC;REACTOME\_RECRUITMENT\_OF\_MITOTIC\_CENTROSOME\_PI

TORY\_INTERACTIONS\_BETWEEN\_A\_LYMPHOID\_AND\_A\_NON\_LYMPHOID\_CELL;REACTOME\_  
\_BIOLOGY;REACTOME\_BMAL1\_CLOCK\_NPAS2\_ACTIVATES\_CIRCADIAN\_EXPRESSION;REAC

ANISM\_BY\_IFN\_STIMULATED\_GENES;REACTOME\_INTERFERON\_ALPHA\_BETA\_SIGNALING;F  
;REACTOME\_ADAPTIVE\_IMMUNE\_SYSTEM;REACTOME\_CLASS\_I\_MHC\_MEDIATED\_ANTIGEN

CH1\_TRANSMITS\_SIGNAL\_TO\_THE\_NUCLEUS;REACTOME\_SIGNALING\_BY\_NOTCH1;REACTO

PTOR\_SIGNALING\_IN\_EMT\_EPITHELIAL\_TO\_MESENCHYMAL\_TRANSITION;REACTOME\_GPVI

ICED\_DNA\_FRAGMENTATION;REACTOME\_APOPTOSIS;REACTOME\_APOPTOTIC\_EXECUTION  
IPPO  
IPPO

E\_TRANSPORT\_OF\_SMALL\_MOLECULES;REACTOME\_SLC\_MEDIATED\_TRANSMEMBRANE\_TI

\_MATRIX\_ORGANIZATION;REACTOME\_COLLAGEN\_FORMATION

NGF;REACTOME\_SIGNALING\_BY\_SCF\_KIT;REACTOME\_SIGNALING\_BY\_ERBB4;REACTOME\_S

PCR;REACTOME\_CLASS\_C\_3\_METABOTROPIC\_Glutamate\_PHEROMONE\_RECEPTORS;RE  
;REACTOME\_ADAPTIVE\_IMMUNE\_SYSTEM;REACTOME\_CLASS\_I\_MHC\_MEDIATED\_ANTIGEN  
;REACTOME\_ADAPTIVE\_IMMUNE\_SYSTEM;REACTOME\_CLASS\_I\_MHC\_MEDIATED\_ANTIGEN

3;REACTOME\_IMMUNE\_SYSTEM;REACTOME\_ADAPTIVE\_IMMUNE\_SYSTEM  
ATION;REACTOME\_CHONDROITIN\_SULFATE\_DERMATAN\_SULFATE\_METABOLISM;REACTO  
ATION;REACTOME\_CHONDROITIN\_SULFATE\_DERMATAN\_SULFATE\_METABOLISM;REACTO

\_CARBOHYDRATES  
\_LIPIDS\_AND\_LIPOPROTEINS;REACTOME\_FATTY\_ACID\_TRIACYLGLYCEROL\_AND\_KETONE\_

\_PROTEINS;REACTOME\_POST\_TRANSLATIONAL\_PROTEIN\_MODIFICATION;REACTOME\_ASP

NGF;REACTOME\_DEVELOPMENTAL\_BIOLOGY;REACTOME\_TRIF\_MEDIATED\_TLR3\_SIGNALIN

YTAKE\_AND\_DEGRADATION;REACTOME\_HYALURONAN\_METABOLISM;REACTOME\_GLYCOS/  
YTAKE\_AND\_DEGRADATION;REACTOME\_HYALURONAN\_METABOLISM;REACTOME\_GLYCOS/

CF\_KIT;REACTOME\_REGULATION\_OF\_KIT\_SIGNALING;REACTOME\_NEF\_MEDIATES\_DOWN\_

EM;REACTOME\_VOLTAGE\_GATED\_POTASSIUM\_CHANNELS;REACTOME\_POTASSIUM\_CHAN  
EM;REACTOME\_VOLTAGE\_GATED\_POTASSIUM\_CHANNELS;REACTOME\_POTASSIUM\_CHAN

\_CAPPED\_INTRON\_CONTAINING\_PRE\_MRNA;REACTOME\_MRNA\_PROCESSING;REACTOME\_  
\_BIOLOGY;REACTOME\_PPARA\_ACTIVATES\_GENE\_EXPRESSION;REACTOME\_GENERIC\_TR/

ON\_OF\_FGF\_SIGNALING;REACTOME\_NEGATIVE\_REGULATION\_OF\_FGFR\_SIGNALING;REACT

OSTASIS;REACTOME\_PLATELET\_SENSITIZATION\_BY\_LDL;REACTOME\_HEMOSTASIS

◁\_STIMULATES\_FATTY\_ACID\_OXIDATION\_IN\_MUSCLE;REACTOME\_INSULIN\_RECEPTOR\_SIG

REACTOME\_ANTIVIRAL\_MECHANISM\_BY\_IFN\_STIMULATED\_GENES;REACTOME\_SIGNALING\_

\_PROTEINS;REACTOME\_POST\_TRANSLATIONAL\_MODIFICATION\_SYNTHESIS\_OF\_GPI\_ANCH

SIGNALLING\_PATHWAY\_VIA\_PKC\_AND\_MAPK;REACTOME\_SIGNALING\_BY\_GPCR;REACTOME

PROTEINS\_MEDIATED\_TRANSPORT;REACTOME\_TRANSMEMBRANE\_TRANSPORT\_OF\_SMALL\_M  
PROTEINS\_MEDIATED\_TRANSPORT;REACTOME\_TRANSMEMBRANE\_TRANSPORT\_OF\_SMALL\_M

EXTRACELLULAR\_MATRIX\_ORGANIZATION;REACTOME\_COLLAGEN\_FORMATION

TRANSCRIPTION\_AND\_TRANSLATION;REACTOME\_PRE\_NOTCH\_EXPRESSION\_AND\_PROCESSING  
OF\_GTPASES;REACTOME\_DEVELOPMENTAL\_BIOLOGY;REACTOME\_SIGNALING\_BY\_GPCR;F

DEPURINATION\_OF\_NUCLEOTIDES;REACTOME\_PURINE\_SALVAGE;REACTOME\_PURINE\_METABOLISM  
DEPURINATION\_OF\_NUCLEOTIDES;REACTOME\_PURINE\_SALVAGE;REACTOME\_PURINE\_METABOLISM

TRANSCRIPTION\_AND\_TRANSLATION;REACTOME\_SIGNALING\_BY\_NOTCH2;REACTOME\_PRE\_N  
TRANSCRIPTION\_AND\_TRANSLATION;REACTOME\_SIGNALING\_BY\_NOTCH2;REACTOME\_PRE\_N

TRANSCRIPTION\_INITIATION\_FROM\_TYPE\_2\_PROMOTER;REACTOME\_RNA\_POL\_III\_TRANSCRIP

CHARGING\_OF\_TRNA\_AMINOACYLATION;REACTOME\_TRNA\_AMINOACYLATION

PHOSPHOLIPID\_METABOLISM;REACTOME\_PHOSPHOLIPID\_METABOLISM;REACTOME\_PI

ADAPTIVE\_IMMUNE\_SYSTEM;REACTOME\_CLASS\_I\_MHC\_MEDIATED\_ANTIGEN  
PRESENTATION;REACTOME\_PROTEIN\_IMPORT;REACTOME\_METABOLISM\_OF\_PROTEINS

CELL\_CYCLE\_MITOTIC;REACTOME\_MITOTIC\_M\_M\_G1\_PHASES;REACTOME\_DNA\_R  
OF\_GTPASES;REACTOME\_SIGNALING\_BY\_NGF;REACTOME\_DEVELOPMENTAL\_BIOLOGY;R

\_SYSTEM;REACTOME\_IMMUNE\_SYSTEM;REACTOME\_COMPLEMENT\_CASCADE;REACTOME\_PCR;REACTOME\_GPCR\_DOWNSTREAM\_SIGNALING;REACTOME\_G\_ALPHA\_I\_SIGNALLING\_ENSCRIPTION;REACTOME\_TRANSCRIPTION;REACTOME\_RNA\_POL\_I\_RNA\_POL\_III\_AND\_MITCINTERACTIONS\_AT\_THE\_VASCULAR\_WALL;REACTOME\_RESPONSE\_TO\_ELEVATED\_PLATELVAYS;REACTOME\_REGULATION\_OF\_INSULIN\_LIKE\_GROWTH\_FACTOR\_IGF\_ACTIVITY\_BY\_INF\_BIOLOGY;REACTOME\_AXON\_GUIDANCE;REACTOME\_SIGNALING\_BY\_ROBO\_RECEPTOR

\_NON\_CODING\_RNA;REACTOME\_ANTIVIRAL\_MECHANISM\_BY\_IFN\_STIMULATED\_GENES;RE

\_BIOLOGY;REACTOME\_AXON\_GUIDANCE;REACTOME\_NCAM1\_INTERACTIONS;REACTOME\_PROTEIN\_IMPORT;REACTOME\_METABOLISM\_OF\_PROTEINSMETABOLISM;REACTOME\_SYNTHESIS\_OF\_PE;REACTOME\_GLYCEROPHOSPHOLIPID\_BIOSYN\_BIOLOGY;REACTOME\_AXON\_GUIDANCE;REACTOME\_NCAM1\_INTERACTIONS;REACTOME\_COMPLEMENT\_CASCADE;REACTOME\_INNATE\_IMMUNE\_SYSTEM;REACTOME\_IMMUNE\_SY

\_BIOLOGY;REACTOME\_AXON\_GUIDANCE;REACTOME\_CRMP5\_IN\_SEMA3A\_SIGNALING;REA\_STEROID\_HORMONES\_AND\_VITAMINS\_A\_AND\_D;REACTOME\_STEROID\_HORMONES;REAC

E\_TRANSPORT\_OF\_SMALL\_MOLECULES;REACTOME\_IRON\_UPTAKE\_AND\_TRANSPORT

SCRIPTION\_PATHWAY;REACTOME\_NUCLEAR\_RECEPTOR\_TRANSCRIPTION\_PATHWAY

\_TRNA\_AMINOACYLATION;REACTOME\_TRNA\_AMINOACYLATIONTRNA\_AMINOACYLATION;REACTOME\_TRNA\_AMINOACYLATION

\_BIOLOGY;REACTOME\_SIGNALING\_BY\_NODAL;REACTOME\_RESPONSE\_TO\_ELEVATED\_PLAHO\_GTPASES;REACTOME\_SIGNALLING\_BY\_NGF;REACTOME\_NRAGE\_SIGNALS\_DEATH\_THF

EM;REACTOME\_TANDEM\_PORE\_DOMAIN\_POTASSIUM\_CHANNELS;REACTOME\_POTASSIUM

NGF;REACTOME\_SIGNALING\_BY\_SCF\_KIT;REACTOME\_DEVELOPMENTAL\_BIOLOGY;REACTOME  
DESCRIPTION\_PATHWAY

\_AMINO\_ACIDS\_AND\_DERIVATIVES;REACTOME\_AMINE\_DERIVED\_HORMONES

MODELLING\_OF\_PC;REACTOME\_PHOSPHOLIPID\_METABOLISM;REACTOME\_ACYL\_CHAIN\_RE  
NGF;REACTOME\_GROWTH\_HORMONE\_RECEPTOR\_SIGNALING;REACTOME\_SIGNALING\_BY

EM;REACTOME\_INTEGRATION\_OF\_ENERGY\_METABOLISM;REACTOME\_REGULATION\_OF\_IN

\_BIOLOGY;REACTOME\_BMAL1\_CLOCK\_NPAS2\_ACTIVATES\_CIRCADIAN\_EXPRESSION;REACTOME

\_NUCLEOTIDES;REACTOME\_PYRIMIDINE\_METABOLISM  
\_NUCLEOTIDES;REACTOME\_PYRIMIDINE\_METABOLISM

E\_TRANSPORT\_OF\_SMALL\_MOLECULES;REACTOME\_SLC\_MEDIATED\_TRANSMEMBRANE\_TRANSPORT

\_BIOLOGY;REACTOME\_CELL\_CELL\_COMMUNICATION;REACTOME\_AXON\_GUIDANCE;REACTOME  
\_BIOLOGY;REACTOME\_CELL\_CELL\_COMMUNICATION;REACTOME\_AXON\_GUIDANCE;REACTOME  
NGF;REACTOME\_P75\_NTR\_RECEPTOR\_MEDIATED\_SIGNALING

ATIONS;REACTOME\_METABOLISM\_OF\_CARBOHYDRATES;REACTOME\_GLUCURONIDATION  
S;REACTOME\_IL1\_SIGNALING;REACTOME\_IRAK1\_RECRUITS\_IKK\_COMPLEX;REACTOME\_THO\_GTPASES

RBOXYLATION\_HYPUSINE\_FORMATION\_AND\_ARYLSULFATASE\_ACTIVATION;REACTOME\_G/

\_CAPPED\_INTRON\_CONTAINING\_PRE\_MRNA;REACTOME\_MRNA\_PROCESSING;REACTOME\_

CTOME\_CELL\_CYCLE\_MITOTIC;REACTOME\_MITOTIC\_M\_M\_G1\_PHASES;REACTOME\_DNA\_R

NGF;REACTOME\_SIGNALLING\_TO\_RAS;REACTOME\_NGF\_SIGNALLING\_VIA\_TRKA\_FROM\_TH  
RBOXYLATION\_HYPUSINE\_FORMATION\_AND\_ARYLSULFATASE\_ACTIVATION;REACTOME\_G/

IPID\_METABOLISM;REACTOME\_PHOSPHOLIPID\_METABOLISM;REACTOME\_SPHINGOLIPID\_M

PCR;REACTOME\_CLASS\_A1\_RHODOPSIN\_LIKE\_RECEPTORS;REACTOME\_GPCR\_LIGAND\_BI

\_E\_CONTRACTION;REACTOME\_MUSCLE\_CONTRACTION  
FICKING;REACTOME\_SIGNALING\_BY\_EGFR\_IN\_CANCER;REACTOME\_EGFR\_DOWNREGULA

\_ENERGY\_METABOLISM;REACTOME\_REGULATION\_OF\_INSULIN\_SECRETION;REACTOME\_S  
\_ENERGY\_METABOLISM;REACTOME\_REGULATION\_OF\_INSULIN\_SECRETION;REACTOME\_S

BILE\_SALT\_METABOLISM;REACTOME\_SYNTHESIS\_OF\_BILE\_ACIDS\_AND\_BILE\_SALTS\_VIA\_7,



CTOME\_MHC\_CLASS\_II\_ANTIGEN\_PRESENTATION;REACTOME\_CELL\_CYCLE\_MITOTIC;REA  
SURFACE\_INTERACTIONS;REACTOME\_INTEGRATION\_OF\_ENERGY\_METABOLISM;REACTOM

CROSS\_CHEMICAL\_SYNAPSES;REACTOME\_NEURONAL\_SYSTEM;REACTOME\_NEUROTRAN

PID\_METABOLISM;REACTOME\_METABOLISM\_OF\_LIPIDS\_AND\_LIPOPROTEINS  
PCR;REACTOME\_GPCR\_DOWNSTREAM\_SIGNALING;REACTOME\_G\_ALPHA\_S\_SIGNALLING\_

\_BIOLOGY;REACTOME\_ANTIGEN\_PROCESSING\_CROSS\_PRESENTATION;REACTOME\_CELL  
\_BIOLOGY;REACTOME\_EXTRACELLULAR\_MATRIX\_ORGANIZATION;REACTOME\_COLLAGEN\_

CF\_KIT;REACTOME\_GROWTH\_HORMONE\_RECEPTOR\_SIGNALING;REACTOME\_ANTIVIRAL\_M

ACTOME\_METABOLISM\_OF\_PROTEINS

\_AMINO\_ACIDS\_AND\_DERIVATIVES

DN\_OF\_HOMO\_SAPIENS\_WITH\_MYCOBACTERIUM\_TUBERCULOSIS;REACTOME\_TRANSMEM

\_E\_CONTRACTION;REACTOME\_MUSCLE\_CONTRACTION

NGF;REACTOME\_GROWTH\_HORMONE\_RECEPTOR\_SIGNALING;REACTOME\_INSULIN\_RECEI

SIGNALLING\_PATHWAY\_VIA\_PKC\_AND\_MAPK;REACTOME\_SIGNALING\_BY\_GPCR;REACTOME

PAS2\_ACTIVATES\_CIRCADIAN\_EXPRESSION;REACTOME\_CIRCADIAN\_CLOCK

.\_BIOLOGY;REACTOME\_AXON\_GUIDANCE;REACTOME\_L1CAM\_INTERACTIONS

.\_THE\_FANCONI\_ANEMIA\_PATHWAY;REACTOME\_FANCONI\_ANEMIA\_PATHWAY;REACTOME\_I  
CROSS\_CHEMICAL\_SYNAPSES;REACTOME\_NEURONAL\_SYSTEM;REACTOME\_NEUROTRAN

NGF;REACTOME\_SIGNALING\_BY\_SCF\_KIT;REACTOME\_DEVELOPMENTAL\_BIOLOGY;REACTC

EM;REACTOME\_VOLTAGE\_GATED\_POTASSIUM\_CHANNELS;REACTOME\_POTASSIUM\_CHAN  
CRIPTION\_PATHWAY;REACTOME\_NUCLEAR\_RECEPTOR\_TRANSCRIPTION\_PATHWAY

E\_TRANSPORT\_OF\_SMALL\_MOLECULES;REACTOME\_SLC\_MEDIATED\_TRANSMEMBRANE\_TI  
PTOR\_SIGNALING\_IN\_EMT\_EPITHELIAL\_TO\_MESENCHYMAL\_TRANSITION;REACTOME\_DOW

ME\_MEIOTIC\_RECOMBINATION

PCR;REACTOME\_PEPTIDE\_LIGAND\_BINDING\_RECEPTORS;REACTOME\_CLASS\_A1\_RHODOF

.\_MATRIX\_ORGANIZATION;REACTOME\_COLLAGEN\_FORMATION

:S\_GENE\_EXPRESSION;REACTOME\_METABOLISM\_OF\_LIPIDS\_AND\_LIPOPROTEINS;REACTC

CROSS\_CHEMICAL\_SYNAPSES;REACTOME\_NEURONAL\_SYSTEM  
CROSS\_CHEMICAL\_SYNAPSES;REACTOME\_NEURONAL\_SYSTEM  
GFR\_IN\_DISEASE;REACTOME\_SIGNALING\_BY\_FGFR  
APOPTOSIS;REACTOME\_ROLE\_OF\_DCC\_IN\_REGULATING\_APOPTOSIS;REACTOME\_APOPT

AMINO\_ACIDS\_AND\_DERIVATIVES  
BIOLOGY;REACTOME\_AXON\_GUIDANCE;REACTOME\_CRMP5\_IN\_SEMA3A\_SIGNALING;REA

ME\_CELL\_CYCLE;REACTOME\_CELL\_CYCLE\_CHECKPOINTS;REACTOME\_REGULATION\_OF\_T  
MATRIX\_ORGANIZATION;REACTOME\_COLLAGEN\_FORMATION

L\_ACTIVITY\_OF\_SMAD2\_SMAD3\_SMAD4\_HETEROTRIMER;REACTOME\_DOWNREGULATION\_  
EM;REACTOME\_CGMP\_EFFECTS;REACTOME\_NITRIC\_OXIDE\_STIMULATES\_GUANYLATE\_CY

\_AMINO\_ACIDS\_AND\_DERIVATIVES;REACTOME\_BRANCHED\_CHAIN\_AMINO\_ACID\_CATABOL

PCR;REACTOME\_PEPTIDE\_LIGAND\_BINDING\_RECEPTORS;REACTOME\_CLASS\_A1\_RHODOF

OSYLATION\_OF\_MUCINS;REACTOME\_TERMINATION\_OF\_O\_GLYCAN\_BIOSYNTHESIS;REACTO

VAYS;REACTOME\_ACTIVATION\_OF\_CHAPERONE\_GENES\_BY\_XBP1S;REACTOME\_UNFOLDE

LATORS\_OF\_RIG\_I\_MDA5\_SIGNALING;REACTOME\_RIG\_I\_MDA5\_MEDIATED\_INDUCTION\_OF\_  
LATORS\_OF\_RIG\_I\_MDA5\_SIGNALING;REACTOME\_RIG\_I\_MDA5\_MEDIATED\_INDUCTION\_OF\_

HO\_GTPASES

CROSS\_CHEMICAL\_SYNAPSES;REACTOME\_NEURONAL\_SYSTEM;REACTOME\_NEUROTRAN

VAYS;REACTOME\_INSULIN\_SYNTHESIS\_AND\_PROCESSING

DATIONS;REACTOME\_GLUCURONIDATION;REACTOME\_PHASE\_II\_CONJUGATION

E\_TRANSPORT\_OF\_SMALL\_MOLECULES;REACTOME\_SLC\_MEDIATED\_TRANSMEMBRANE\_TI

\_MATRIX\_ORGANIZATION;REACTOME\_COLLAGEN\_FORMATION

31;REACTOME\_CELL\_CYCLE;REACTOME\_CELL\_CYCLE\_MITOTIC;REACTOME\_MITOTIC\_G1\_C  
HO\_GTPASES

THESIS;REACTOME\_HEPARAN\_SULFATE\_HEPARIN\_HS\_GAG\_METABOLISM;REACTOME\_GLY

OSYLATION\_OF\_MUCINS;REACTOME\_METABOLISM\_OF\_PROTEINS;REACTOME\_POST\_TRAN

E\_TRANSPORT\_OF\_SMALL\_MOLECULES;REACTOME\_SLC\_MEDIATED\_TRANSMEMBRANE\_T  
CTOME\_CELL\_CYCLE\_MITOTIC;REACTOME\_RECRUITMENT\_OF\_MITOTIC\_CENTROSOME\_PI

E\_TRANSPORT\_OF\_SMALL\_MOLECULES;REACTOME\_SLC\_MEDIATED\_TRANSMEMBRANE\_T

HO\_GTPASES;REACTOME\_SIGNALLING\_BY\_NGF;REACTOME\_DEVELOPMENTAL\_BIOLOGY;R  
HO\_GTPASES;REACTOME\_SIGNALLING\_BY\_NGF;REACTOME\_DEVELOPMENTAL\_BIOLOGY;R

<\_STIMULATES\_FATTY\_ACID\_OXIDATION\_IN\_MUSCLE;REACTOME\_INSULIN\_RECEPTOR\_SIG  
\_LIPIDS\_AND\_LIPOPROTEINS;REACTOME\_FATTY\_ACID\_TRIACYLGLYCEROL\_AND\_KETONE\_  
:S\_GENE\_EXPRESSION;REACTOME\_METABOLISM\_OF\_LIPIDS\_AND\_LIPOPROTEINS;REACTC

PCR;REACTOME\_OPIOID\_SIGNALLING;REACTOME\_DARPP\_32\_EVENTS;REACTOME\_GPCR\_|  
CTOME\_CELL\_CYCLE\_MITOTIC;REACTOME\_MITOTIC\_M\_M\_G1\_PHASES;REACTOME\_CHROM

NGF;REACTOME\_SIGNALING\_BY\_SCF\_KIT;REACTOME\_CELL\_CELL\_COMMUNICATION;REAC`  
CTOME\_CELL\_CYCLE\_CHECKPOINTS;REACTOME\_ACTIVATION\_OF\_ATR\_IN\_RESPONSE\_TO

TION;REACTOME\_CHONDROITIN\_SULFATE\_BIOSYNTHESIS;REACTOME\_CHONDROITIN\_SUI

RBOXYLATION\_HYPUSINE\_FORMATION\_AND\_ARYLSULFATASE\_ACTIVATION;REACTOME\_GL

.\_BIOLOGY;REACTOME\_AXON\_GUIDANCE;REACTOME\_OTHER\_SEMAPHORIN\_INTERACTION

CTOME\_CELL\_CYCLE\_MITOTIC;REACTOME\_CELL\_CYCLE\_CHECKPOINTS;REACTOME\_CYCL  
CTOME\_CELL\_CYCLE\_MITOTIC;REACTOME\_CELL\_CYCLE\_CHECKPOINTS;REACTOME\_CYCL  
PHA\_BETA\_SIGNALING;REACTOME\_INTERFERON\_SIGNALING;REACTOME\_IMMUNE\_SYSTEM  
PHA\_BETA\_SIGNALING;REACTOME\_INTERFERON\_SIGNALING;REACTOME\_IMMUNE\_SYSTEM

ACTOME\_CTNNB1\_PHOSPHORYLATION\_CASCADE;  
ACTOME\_NITRIC\_OXIDE\_STIMULATES\_GUANYLATE\_CYCLASE;  
ACTOME\_PLATELET\_HC

IPPO

ACTOME\_AMINOACYLATION;  
ACTOME\_TRNA\_AMINOACYLATION;  
ACTOME\_BIOLOGY;  
ACTOME\_AXON\_GUIDANCE;  
ACTOME\_NETRIN1\_SIGNALING

ACTOME\_FGFR\_SIGNALING;  
ACTOME\_INSULIN\_RECEPTOR\_SIGNALLING\_CASCADE;  
ACTOME\_FGFR\_SIGNALING;  
ACTOME\_INSULIN\_RECEPTOR\_SIGNALLING\_CASCADE;  
ACTOME\_FGFR\_SIGNALING;  
ACTOME\_INSULIN\_RECEPTOR\_SIGNALLING\_CASCADE;  
ACTOME

ACTOME\_SRP\_DEPENDENT\_COTRANSLATIONAL\_PROTEIN\_TARGETING\_TO\_MEMBRANE;  
ACTOME\_PCR;  
ACTOME\_CLASS\_C\_3\_METABOTROPIC\_Glutamate\_PHEROMONE\_RECEPTORS;  
ACTOME

ACTOME\_PROTEINS;  
ACTOME\_POST\_TRANSLATIONAL\_PROTEIN\_MODIFICATION;  
ACTOME\_ASP\_PROTEINS;  
ACTOME\_POST\_TRANSLATIONAL\_PROTEIN\_MODIFICATION;  
ACTOME\_SYN

ACTOME\_FICKING;  
ACTOME\_TRANS\_GOLGI\_NETWORK\_VESICLE\_BUDDING;  
ACTOME\_GOLGI\_AS

ACTOME\_CRIPTION\_PATHWAY

ACTOME\_COMBINATION\_REPAIR\_OF\_REPLICATION\_INDEPENDENT\_DOUBLE\_STRAND\_BREAKS;  
ACTOME\_REA

ACTOME\_AMINOACYLATION;  
ACTOME\_TRNA\_AMINOACYLATION

ACTOME\_MATRIX\_ORGANIZATION;  
ACTOME\_COLLAGEN\_FORMATION;  
ACTOME\_MATRIX\_ORGANIZATION;  
ACTOME\_COLLAGEN\_FORMATION

NGF;REACTOME\_DAG\_AND\_IP3\_SIGNALING;REACTOME\_SIGNALING\_BY\_ERBB2;REACTOME  
SCRIPTION\_PATHWAY;REACTOME\_NUCLEAR\_RECEPTOR\_TRANSCRIPTION\_PATHWAY  
SCRIPTION\_PATHWAY;REACTOME\_NUCLEAR\_RECEPTOR\_TRANSCRIPTION\_PATHWAY  
SCRIPTION\_PATHWAY;REACTOME\_NUCLEAR\_RECEPTOR\_TRANSCRIPTION\_PATHWAY  
ACTOME\_SRP\_DEPENDENT\_COTRANSLATIONAL\_PROTEIN\_TARGETING\_TO\_MEMBRANE;RE

3FR\_IN\_DISEASE;REACTOME\_FRS2\_MEDIATED\_CASCADE;REACTOME\_DOWNSTREAM\_SIGI

A\_BIOGENESIS;REACTOME\_REGULATORY\_RNA\_PATHWAYS

\_MATRIX\_ORGANIZATION;REACTOME\_COLLAGEN\_FORMATION

\_AMINO\_ACIDS\_AND\_DERIVATIVES;REACTOME\_BRANCHED\_CHAIN\_AMINO\_ACID\_CATABOL  
E\_TRANSPORT\_OF\_SMALL\_MOLECULES;REACTOME\_SLC\_MEDIATED\_TRANSMEMBRANE\_TI

SCRIPTION\_PATHWAY;REACTOME\_NUCLEAR\_RECEPTOR\_TRANSCRIPTION\_PATHWAY

SURFACE\_INTERACTIONS  
SURFACE\_INTERACTIONS

ROTOXICITY;REACTOME\_PROTEOLYTIC\_CLEAVAGE\_OF\_SNARE\_COMPLEX\_PROTEINS;REA



JLFATE\_DERMATAN\_SULFATE\_METABOLISM;REACTOME\_GLYCOSAMINOGLYCAN\_METABOLISM

ME\_CELL\_CYCLE;REACTOME\_CHROMOSOME\_MAINTENANCE;REACTOME\_MEIOTIC\_SYNAPOSMAL  
ME\_CELL\_CYCLE;REACTOME\_CHROMOSOME\_MAINTENANCE;REACTOME\_MEIOTIC\_SYNAPOSMAL  
ME\_CELL\_CYCLE;REACTOME\_CHROMOSOME\_MAINTENANCE;REACTOME\_MEIOTIC\_SYNAPOSMAL

\_LIPIDS\_AND\_LIPOPROTEINS;REACTOME\_LIPID\_DIGESTION\_MOBILIZATION\_AND\_TRANSPORT  
;REACTOME\_ADAPTIVE\_IMMUNE\_SYSTEM;REACTOME\_CLASS\_I\_MHC\_MEDIATED\_ANTIGEN

JLFATE\_BIOSYNTHESIS;REACTOME\_CHONDROITIN\_SULFATE\_DERMATAN\_SULFATE\_METABOLISM  
IGNALING\_EVENTS\_OF\_B\_CELL\_RECEPTOR\_BCR;REACTOME\_ACTIVATION\_OF\_NF\_KAPPAE

SIGNALLING\_PATHWAY\_VIA\_PKC\_AND\_MAPK;REACTOME\_SIGNALING\_BY\_GPCR;REACTOME

\_MATRIX\_ORGANIZATION;REACTOME\_COLLAGEN\_FORMATION

PROTEINS\_MEDIATED\_TRANSPORT;REACTOME\_TRANSMEMBRANE\_TRANSPORT\_OF\_SMALL\_MOLECULES

\_AMINO\_ACIDS\_AND\_DERIVATIVES;REACTOME\_BRANCHED\_CHAIN\_AMINO\_ACID\_CATABOLISM  
TLR3\_SIGNALING;REACTOME\_TAK1\_ACTIVATES\_NFKB\_BY\_PHOSPHORYLATION\_AND\_ACTIVATION

:\_TRIC\_CCT\_WITH\_TARGET\_PROTEINS\_DURING\_BIOSYNTHESIS;REACTOME\_PROTEIN\_FOL

.BOLISM\_AND\_CITRIC\_ACID\_TCA\_CYCLE;REACTOME\_TCA\_CYCLE\_AND\_RESPIRATORY\_ELE  
VGF;REACTOME\_DAG\_AND\_IP3\_SIGNALING;REACTOME\_SIGNALING\_BY\_ERBB2;REACTOME  
VAYS;REACTOME\_REGULATION\_OF\_INSULIN\_LIKE\_GROWTH\_FACTOR\_IGF\_ACTIVITY\_BY\_IN

OSYLATION\_OF\_MUCINS;REACTOME\_METABOLISM\_OF\_PROTEINS;REACTOME\_POST\_TRAN

ME\_CELL\_CYCLE;REACTOME\_CHROMOSOME\_MAINTENANCE;REACTOME\_MEIOTIC\_SYNAP  
PCR;REACTOME\_CLASS\_B\_2\_SECRETIN\_FAMILY\_RECEPTORS;REACTOME\_GPCR\_LIGAND\_

CH1\_TRANSMITS\_SIGNAL\_TO\_THE\_NUCLEUS;REACTOME\_SIGNALING\_BY\_NOTCH1;REACTO

.\_BIOLOGY;REACTOME\_EXTRACELLULAR\_MATRIX\_ORGANIZATION;REACTOME\_CELL\_SURF  
;REACTOME\_ADAPTIVE\_IMMUNE\_SYSTEM;REACTOME\_CLASS\_I\_MHC\_MEDIATED\_ANTIGEN

\_MATRIX\_ORGANIZATION;REACTOME\_COLLAGEN\_FORMATION

OSYLATION\_OF\_MUCINS;REACTOME\_TERMINATION\_OF\_O\_GLYCAN\_BIOSYNTHESIS;REACTO  
GFR\_IN\_DISEASE;REACTOME\_SIGNALING\_BY\_FGFR1\_MUTANTS;REACTOME\_SIGNALING\_BY

'NT;REACTOME\_CROSS\_PRESENTATION\_OF\_SOLUBLE\_EXOGENOUS\_ANTIGENS\_ENDOSOM  
THE\_PRE\_REPLICATIVE\_COMPLEX;REACTOME\_CELL\_CYCLE;REACTOME\_ORC1\_REMOVAL

\_AMINO\_ACIDS\_AND\_DERIVATIVES

MUNICATION;REACTOME\_CELL\_EXTRACELLULAR\_MATRIX\_INTERACTIONS;REACTOME\_CEL  
PCR;REACTOME\_CLASS\_B\_2\_SECRETIN\_FAMILY\_RECEPTORS;REACTOME\_GPCR\_LIGAND

SIGNALLING\_PATHWAY\_VIA\_PKC\_AND\_MAPK;REACTOME\_SIGNALING\_BY\_GPCR;REACTOME  
SIGNALLING\_PATHWAY\_VIA\_PKC\_AND\_MAPK;REACTOME\_SIGNALING\_BY\_GPCR;REACTOME  
OR\_RECYCLING;REACTOME\_LATENT\_INFECTION\_OF\_HOMO\_SAPIENS\_WITH\_MYCOBACTERI

\_CARBOHYDRATES;REACTOME\_DIGESTION\_OF\_DIETARY\_CARBOHYDRATE

PTERIN\_BH4\_SYNTHESIS\_RECYCLING\_SALVAGE\_AND\_REGULATION;REACTOME\_LATENT\_I

\_BIOLOGY;REACTOME\_SIGNALING\_BY\_GPCR;REACTOME\_OPIOID\_SIGNALLING;REACTOME

<\_STIMULATES\_FATTY\_ACID\_OXIDATION\_IN\_MUSCLE;REACTOME\_INSULIN\_RECEPTOR\_SIG  
<\_STIMULATES\_FATTY\_ACID\_OXIDATION\_IN\_MUSCLE;REACTOME\_INSULIN\_RECEPTOR\_SIG

;REACTOME\_ADAPTIVE\_IMMUNE\_SYSTEM;REACTOME\_CLASS\_I\_MHC\_MEDIATED\_ANTIGEN

;TOME\_INNATE\_IMMUNE\_SYSTEM;REACTOME\_IMMUNE\_SYSTEM

HO\_GTPASES  
\_PROTEINS;REACTOME\_POST\_TRANSLATIONAL\_PROTEIN\_MODIFICATION;REACTOME\_ASP

/ED\_IN\_MEGAKARYOCYTE\_DEVELOPMENT\_AND\_PLATELET\_PRODUCTION;REACTOME\_HEM

ME\_MEIOTIC\_RECOMBINATION

.\_BIOLOGY;REACTOME\_NEGATIVE\_REGULATION\_OF\_FGFR\_SIGNALING;REACTOME\_INSULII  
.\_BIOLOGY;REACTOME\_NEGATIVE\_REGULATION\_OF\_FGFR\_SIGNALING;REACTOME\_INSULII

REPAIR;REACTOME\_RESOLUTION\_OF\_AP\_SITES\_VIA\_THE\_MULTIPLE\_NUCLEOTIDE\_PATCH

PCR;REACTOME\_GPCR\_DOWNSTREAM\_SIGNALING;REACTOME\_G\_ALPHA\_S\_SIGNALLING\_

\_BIOLOGY;REACTOME\_METABOLISM\_OF\_LIPIDS\_AND\_LIPOPOTEINS;REACTOME\_TRANSC

\_FATTY\_ACID\_BETA\_OXIDATION;REACTOME\_METABOLISM\_OF\_LIPIDS\_AND\_LIPOPOTEINS  
\_FATTY\_ACID\_BETA\_OXIDATION;REACTOME\_METABOLISM\_OF\_LIPIDS\_AND\_LIPOPOTEINS

EM;REACTOME\_VOLTAGE\_GATED\_POTASSIUM\_CHANNELS;REACTOME\_POTASSIUM\_CHAN

EM;REACTOME\_TANDEM\_PORE\_DOMAIN\_POTASSIUM\_CHANNELS;REACTOME\_POTASSIUM

AVAGE\_OF\_CELLULAR\_PROTEINS;REACTOME\_CELL\_CELL\_COMMUNICATION;REACTOME\_C

ROTRANSMITTER\_RELEASE\_CYCLE;REACTOME\_TRANSMISSION\_ACROSS\_CHEMICAL\_SYN  
NSCRIPTION;REACTOME\_TRANSCRIPTION;REACTOME\_RNA\_POL\_I\_RNA\_POL\_III\_AND\_MITC

E\_TRANSPORT\_OF\_SMALL\_MOLECULES;REACTOME\_SLC\_MEDIATED\_TRANSMEMBRANE\_T

\_RESPIRATORY\_ELECTRON\_TRANSPORT;REACTOME\_RESPIRATORY\_ELECTRON\_TRANSP  
MUNICATION;REACTOME\_CELL\_EXTRACELLULAR\_MATRIX\_INTERACTIONS;REACTOME\_CEL

NGF;REACTOME\_NGF\_SIGNALLING\_VIA\_TRKA\_FROM\_THE\_PLASMA\_MEMBRANE

NGF;REACTOME\_INSULIN\_RECEPTOR\_SIGNALLING\_CASCADE;REACTOME\_SIGNALLING\_TO  
A\_AMINOACYLATION;REACTOME\_TRNA\_AMINOACYLATION

\_PORPHYRINS  
\_MATRIX\_ORGANIZATION;REACTOME\_COLLAGEN\_FORMATION  
\_MATRIX\_ORGANIZATION;REACTOME\_COLLAGEN\_FORMATION  
\_MATRIX\_ORGANIZATION;REACTOME\_COLLAGEN\_FORMATION

VAYS;REACTOME\_REGULATION\_OF\_INSULIN\_LIKE\_GROWTH\_FACTOR\_IGF\_ACTIVITY\_BY\_IN

CTOME\_CELL\_CYCLE\_MITOTIC;REACTOME\_RECRUITMENT\_OF\_MITOTIC\_CENTROSOME\_PI

NGF;REACTOME\_SIGNALING\_BY\_SCF\_KIT;REACTOME\_SIGNALING\_BY\_ERBB4;REACTOME\_S  
;REACTOME\_ADAPTIVE\_IMMUNE\_SYSTEM;REACTOME\_CLASS\_I\_MHC\_MEDIATED\_ANTIGEN  
ROTRANSMITTER\_RELEASE\_CYCLE;REACTOME\_TRANSMISSION\_ACROSS\_CHEMICAL\_SYN  
\_VITAMINS\_AND\_COFACTORS

AVAGE\_OF\_CELLULAR\_PROTEINS;REACTOME\_DEVELOPMENTAL\_BIOLOGY;REACTOME\_CEL  
AVAGE\_OF\_CELLULAR\_PROTEINS;REACTOME\_DEVELOPMENTAL\_BIOLOGY;REACTOME\_CEL  
AVAGE\_OF\_CELLULAR\_PROTEINS;REACTOME\_DEVELOPMENTAL\_BIOLOGY;REACTOME\_CEL  
AVAGE\_OF\_CELLULAR\_PROTEINS;REACTOME\_DEVELOPMENTAL\_BIOLOGY;REACTOME\_CEL  
\_AMINO\_ACIDS\_AND\_DERIVATIVES;REACTOME\_AMINO\_ACID\_SYNTHESIS\_AND\_INTERCONV  
\_AMINO\_ACIDS\_AND\_DERIVATIVES;REACTOME\_AMINO\_ACID\_SYNTHESIS\_AND\_INTERCONV  
\_PROTEINS;REACTOME\_POST\_TRANSLATIONAL\_PROTEIN\_MODIFICATION;REACTOME\_SYN  
PID\_METABOLISM;REACTOME\_METABOLISM\_OF\_LIPIDS\_AND\_LIPOPROTEINS  
PID\_METABOLISM;REACTOME\_METABOLISM\_OF\_LIPIDS\_AND\_LIPOPROTEINS  
NGF;REACTOME\_ARMS\_MEDIATED\_ACTIVATION;REACTOME\_PROLONGED\_ERK\_ACTIVATIO

NSCRIPTION\_INITIATION\_FROM\_TYPE\_2\_PROMOTER;REACTOME\_RNA\_POL\_III\_TRANSCRIP  
NGF;REACTOME\_SIGNALLING\_TO\_RAS;REACTOME\_NGF\_SIGNALLING\_VIA\_TRKA\_FROM\_TH

\_AMINO\_ACIDS\_AND\_DERIVATIVES;REACTOME\_AMINE\_DERIVED\_HORMONES  
\_BIOLOGY;REACTOME\_EXTRACELLULAR\_MATRIX\_ORGANIZATION;REACTOME\_COLLAGEN\_  
\_BIOLOGY;REACTOME\_EXTRACELLULAR\_MATRIX\_ORGANIZATION;REACTOME\_COLLAGEN\_  
\_BIOLOGY;REACTOME\_EXTRACELLULAR\_MATRIX\_ORGANIZATION;REACTOME\_COLLAGEN\_

WAY\_FOR\_APOPTOSIS;REACTOME\_TRAF6\_MEDIATED\_IRF7\_ACTIVATION;REACTOME\_TRAF  
\_PROTEINS;REACTOME\_POST\_TRANSLATIONAL\_PROTEIN\_MODIFICATION;REACTOME\_ASP  
E\_TRANSPORT\_OF\_SMALL\_MOLECULES;REACTOME\_SLC\_MEDIATED\_TRANSMEMBRANE\_TI

\_STEROID\_HORMONES\_AND\_VITAMINS\_A\_AND\_D;REACTOME\_HDL\_MEDIATED\_LIPID\_TRAN  
\_STEROID\_HORMONES\_AND\_VITAMINS\_A\_AND\_D;REACTOME\_HDL\_MEDIATED\_LIPID\_TRAN

SURFACE\_INTERACTIONS;REACTOME\_P130CAS\_LINKAGE\_TO\_MAPK\_SIGNALING\_FOR\_INTE

METABOLISM;REACTOME\_SYNTHESIS\_OF\_PC;REACTOME\_GLYCEROPHOSPHOLIPID\_BIOSYN

\_MATRIX\_ORGANIZATION;REACTOME\_COLLAGEN\_FORMATION

PCR;REACTOME\_OPIOID\_SIGNALLING;REACTOME\_DARPP\_32\_EVENTS



DATIONS;REACTOME\_XENOBIOTICS;REACTOME\_CYTOCHROME\_P450\_ARRANGED\_BY\_SUB:  
TES\_B\_CELL\_RECEPTOR\_LEADING\_TO\_GENERATION\_OF\_SECOND\_MESSENGERS;REACTC

JATION;REACTOME\_HEPARAN\_SULFATE\_HEPARIN\_HS\_GAG\_METABOLISM;REACTOME\_GLY

MUNICATION;REACTOME\_EXTRACELLULAR\_MATRIX\_ORGANIZATION;REACTOME\_COLLAGE

NGF;REACTOME\_P75\_NTR\_RECEPTOR\_MEDIATED\_SIGNALLING  
\_BIOLOGY;REACTOME\_AXON\_GUIDANCE;REACTOME\_NCAM1\_INTERACTIONS;REACTOME\_

\_BIOLOGY;REACTOME\_AXON\_GUIDANCE;REACTOME\_NETRIN1\_SIGNALING;REACTOME\_DC  
\_BIOLOGY;REACTOME\_AXON\_GUIDANCE;REACTOME\_NETRIN1\_SIGNALING;REACTOME\_DC

\_AMINO\_ACIDS\_AND\_DERIVATIVES;REACTOME\_BIOLOGICAL\_OXIDATIONS;REACTOME\_PHA  
\_AMINO\_ACIDS\_AND\_DERIVATIVES;REACTOME\_BIOLOGICAL\_OXIDATIONS;REACTOME\_PHA  
\_AMINO\_ACIDS\_AND\_DERIVATIVES;REACTOME\_BIOLOGICAL\_OXIDATIONS;REACTOME\_PHA

'NT;REACTOME\_CROSS\_PRESENTATION\_OF\_SOLUBLE\_EXOGENOUS\_ANTIGENS\_ENDOSOI

NGF;REACTOME\_DEVELOPMENTAL\_BIOLOGY;REACTOME\_NEF\_MEDIATES\_DOWN\_MODULA

)SYLATION\_OF\_MUCINS;REACTOME\_TERMINATION\_OF\_O\_GLYCAN\_BIOSYNTHESIS;REACTC  
)SYLATION\_OF\_MUCINS;REACTOME\_TERMINATION\_OF\_O\_GLYCAN\_BIOSYNTHESIS;REACTC  
)SYLATION\_OF\_MUCINS;REACTOME\_TERMINATION\_OF\_O\_GLYCAN\_BIOSYNTHESIS;REACTC  
)SYLATION\_OF\_MUCINS;REACTOME\_TERMINATION\_OF\_O\_GLYCAN\_BIOSYNTHESIS;REACTC

OSYLATION\_OF\_MUCINS;REACTOME\_TERMINATION\_OF\_O\_GLYCAN\_BIOSYNTHESIS;REACTOME\_AMINO\_ACIDS\_AND\_DERIVATIVES;REACTOME\_AMINE\_DERIVED\_HORMONES

TORY\_INTERACTIONS\_BETWEEN\_A\_LYMPHOID\_AND\_A\_NON\_LYMPHOID\_CELL;REACTOME\_

PCR;REACTOME\_OLFACTORY\_SIGNALING\_PATHWAY;REACTOME\_GPCR\_DOWNSTREAM\_S

PAS2\_ACTIVATES\_CIRCADIAN\_EXPRESSION;REACTOME\_PPARA\_ACTIVATES\_GENE\_EXPRES

OR\_SIGNALLING\_CASCADE;REACTOME\_SIGNALING\_BY\_GPCR;REACTOME\_GPCR\_DOWNST  
\_STEROID\_HORMONES\_AND\_VITAMINS\_A\_AND\_D;REACTOME\_BIOLOGICAL\_OXIDATIONS;RI

\_AMINO\_ACIDS\_AND\_DERIVATIVES;REACTOME\_AMINE\_DERIVED\_HORMONES

TLR3\_SIGNALING;REACTOME\_RIP\_MEDIATED\_NFKB\_ACTIVATION\_VIA\_DAI;REACTOME\_GAS  
BOLISM\_AND\_CITRIC\_ACID\_TCA\_CYCLE;REACTOME\_TCA\_CYCLE\_AND\_RESPIRATORY\_ELE  
E\_TRANSPORT\_OF\_SMALL\_MOLECULES;REACTOME\_SLC\_MEDIATED\_TRANSMEMBRANE\_TI

AVAGE\_OF\_CELLULAR\_PROTEINS;REACTOME\_CASPASE\_MEDIATED\_CLEAVAGE\_OF\_CYTOS

IOSYNTHESIS;REACTOME\_FATTY\_ACYL\_COA\_BIOSYNTHESIS;REACTOME\_METABOLISM\_OF

CTOME\_CELL\_CYCLE\_MITOTIC;REACTOME\_RECRUITMENT\_OF\_MITOTIC\_CENTROSOME\_PI

PCR;REACTOME\_OLFACTORY\_SIGNALING\_PATHWAY;REACTOME\_GPCR\_DOWNSTREAM\_S

PCR;REACTOME\_OLFACTORY\_SIGNALING\_PATHWAY;REACTOME\_GPCR\_DOWNSTREAM\_S  
PCR;REACTOME\_OLFACTORY\_SIGNALING\_PATHWAY;REACTOME\_GPCR\_DOWNSTREAM\_S  
'\_5\_TO\_3\_EXORIBONUCLEASE;REACTOME\_METABOLISM\_OF\_MRNA;REACTOME\_DEADENYL

:S\_GENE\_EXPRESSION;REACTOME\_ALPHA\_LINOLENIC\_ACID\_ALA\_METABOLISM;REACTOME

\_CAPPED\_INTRON\_CONTAINING\_PRE\_MRNA;REACTOME\_TRANSPORT\_OF\_MATURE\_TRAN

NGF;REACTOME\_SIGNALING\_BY\_SCF\_KIT;REACTOME\_SIGNALING\_BY\_ERBB4;REACTOME\_S  
KDOWN\_GLYCOGENOLYSIS;REACTOME\_METABOLISM\_OF\_CARBOHYDRATES;REACTOME\_

VAYS;REACTOME\_ACTIVATION\_OF\_CHAPERONE\_GENES\_BY\_XBP1S;REACTOME\_UNFOLDED  
THE\_PRE\_REPLICATIVE\_COMPLEX;REACTOME\_CELL\_CYCLE;REACTOME\_PROCESSIVE\_SY  
EM;REACTOME\_TANDEM\_PORE\_DOMAIN\_POTASSIUM\_CHANNELS;REACTOME\_POTASSIUM

3;REACTOME\_IMMUNE\_SYSTEM;REACTOME\_ADAPTIVE\_IMMUNE\_SYSTEM  
3;REACTOME\_IMMUNE\_SYSTEM;REACTOME\_ADAPTIVE\_IMMUNE\_SYSTEM

ANTIGEN\_PRESENTATION;REACTOME\_FACTORS\_INVOLVED\_IN\_MEGAKARYOCYTE\_DEVELOP

MENT\_OF\_TGF\_BETA\_RECEPTOR\_SIGNALING;REACTOME\_TGF\_BETA\_RECEPTOR\_SIGNALING\_  
RESPIRATORY\_ELECTRON\_TRANSPORT;REACTOME\_RESPIRATORY\_ELECTRON\_TRANSPOR  
OR\_RECYCLING;REACTOME\_LATENT\_INFECTION\_OF\_HOMO\_SAPIENS\_WITH\_MYCOBACTERI

\_LIPIDS\_AND\_LIPOPROTEINS;REACTOME\_CHOLESTEROL\_BIOSYNTHESIS

HO\_GTPASES

LIPID\_METABOLISM;REACTOME\_PHOSPHOLIPID\_METABOLISM;REACTOME\_SPHINGOLIPID\_M  
E\_TRANSPORT\_OF\_SMALL\_MOLECULES;REACTOME\_SLC\_MEDIATED\_TRANSMEMBRANE\_T

ANTIGEN\_PRESENTATION;REACTOME\_IMMUNE\_SYSTEM;REACTOME\_ADAPTIVE\_IMMUNE\_SY  
STIMULATES\_GUANYLATE\_CYCLASE;REACTOME\_PLATELET\_HOMEOSTASIS;REACTOME\_HEM

ORRIBB2;REACTOME\_HIV\_INFECTION;REACTOME\_HOST\_INTERACTIONS\_OF\_HIV\_FACTORS;RE  
\_AMINO\_ACIDS\_AND\_DERIVATIVES;REACTOME\_BRANCHED\_CHAIN\_AMINO\_ACID\_CATABOL  
ME\_CELL\_CYCLE;REACTOME\_P53\_INDEPENDENT\_G1\_S\_DNA\_DAMAGE\_CHECKPOINT;REAC

CTOME\_CELL\_CYCLE\_MITOTIC;REACTOME\_MITOTIC\_M\_M\_G1\_PHASES;REACTOME\_DNA\_R  
MUNICATION;REACTOME\_ADHERENS\_JUNCTIONS\_INTERACTIONS;REACTOME\_CELL\_CELL

\_BIOLOGY;REACTOME\_AXON\_GUIDANCE;REACTOME\_L1CAM\_INTERACTIONS;REACTOME\_I

\_TRANSPORT;REACTOME\_MEMBRANE\_TRAFFICKING  
'\_5\_TO\_3\_EXORIBONUCLEASE;REACTOME\_METABOLISM\_OF\_MRNA;REACTOME\_DEADENYL

HO\_GTPASES;REACTOME\_SIGNALLING\_BY\_NGF;REACTOME\_DEVELOPMENTAL\_BIOLOGY;R  
HO\_GTPASES;REACTOME\_SIGNALLING\_BY\_NGF;REACTOME\_DEVELOPMENTAL\_BIOLOGY;R  
PCR;REACTOME\_OLFACTORY\_SIGNALING\_PATHWAY;REACTOME\_GPCR\_DOWNSTREAM\_S

CTOME\_CELL\_CYCLE\_MITOTIC;REACTOME\_G1\_PHASE;REACTOME\_MITOTIC\_G1\_G1\_S\_PHA  
EM;REACTOME\_VOLTAGE\_GATED\_POTASSIUM\_CHANNELS;REACTOME\_POTASSIUM\_CHAN  
WAY\_FOR\_APOPTOSIS;REACTOME\_APOPTOSIS  
DOWN\_MODULATION\_OF\_CELL\_SURFACE\_RECEPTORS\_BY\_RECRUITING\_THEM\_TO\_CLATH

'IPS\_AT\_THE\_GOLGI\_MEMBRANE;REACTOME\_PHOSPHOLIPID\_METABOLISM;REACTOME\_SY  
'IPS\_AT\_THE\_GOLGI\_MEMBRANE;REACTOME\_PHOSPHOLIPID\_METABOLISM;REACTOME\_SY  
BILE\_SALT\_METABOLISM;REACTOME\_RECYCLING\_OF\_BILE\_ACIDS\_AND\_SALTS;REACTOME

OSYLATION\_OF\_MUCINS;REACTOME\_TERMINATION\_OF\_O\_GLYCAN\_BIOSYNTHESIS;REACTO  
OSYLATION\_OF\_MUCINS;REACTOME\_TERMINATION\_OF\_O\_GLYCAN\_BIOSYNTHESIS;REACTO

NGF;REACTOME\_DAG\_AND\_IP3\_SIGNALING;REACTOME\_SIGNALING\_BY\_ERBB2;REACTOME

TORY\_INTERACTIONS\_BETWEEN\_A\_LYMPHOID\_AND\_A\_NON\_LYMPHOID\_CELL;REACTOME

TRIC\_CCT\_WITH\_TARGET\_PROTEINS\_DURING\_BIOSYNTHESIS;REACTOME\_PREFOLDIN\_M

E\_CONTRACTION;REACTOME\_MUSCLE\_CONTRACTION  
TAKE\_AND\_DEGRADATION;REACTOME\_HYALURONAN\_METABOLISM;REACTOME\_GLYCOS/  
REPAIR;REACTOME\_RESOLUTION\_OF\_AP\_SITES\_VIA\_THE\_MULTIPLE\_NUCLEOTIDE\_PATCH

.\_BIOLOGY;REACTOME\_PPARA\_ACTIVATES\_GENE\_EXPRESSION;REACTOME\_METABOLISM\_OF\_HOMO\_SAPIENS\_WITH\_MYCOBACTERIUM\_TUBERCULOSIS;REACTOME\_NITRIC\_OXII

\_PROTEINS;REACTOME\_POST\_TRANSLATIONAL\_PROTEIN\_MODIFICATION;REACTOME\_ASP  
MMA\_SIGNALING;REACTOME\_INTERFERON\_ALPHA\_BETA\_SIGNALING;REACTOME\_INTERFE

CTOME\_CELL\_CYCLE\_MITOTIC;REACTOME\_MITOTIC\_M\_M\_G1\_PHASES;REACTOME\_DNA\_R  
CTOME\_CELL\_CYCLE\_MITOTIC;REACTOME\_MITOTIC\_M\_M\_G1\_PHASES;REACTOME\_DNA\_R  
FICKING;REACTOME\_TRANS\_GOLGI\_NETWORK\_VESICLE\_BUDDING;REACTOME\_GOLGI\_AS

OSYLATION\_OF\_MUCINS;REACTOME\_METABOLISM\_OF\_PROTEINS;REACTOME\_POST\_TRAN

GFR\_IN\_DISEASE;REACTOME\_SIGNALING\_BY\_FGFR1\_MUTANTS;REACTOME\_SIGNALING\_BY

CTOME\_CELL\_CYCLE\_MITOTIC;REACTOME\_CELL\_CYCLE\_CHECKPOINTS;REACTOME\_TRAN

\_FATTY\_ACID\_BETA\_OXIDATION;REACTOME\_METABOLISM\_OF\_LIPIDS\_AND\_LIPOPROTEINS

.\_BIOLOGY;REACTOME\_EXTRACELLULAR\_MATRIX\_ORGANIZATION;REACTOME\_COLLAGEN\_  
\_TRNA\_AMINOACYLATION;REACTOME\_TRNA\_AMINOACYLATION

DESCRIPTION;REACTOME\_TRANSCRIPTION;REACTOME\_FORMATION\_OF\_RNA\_POL\_II\_ELONG  
INTERACTIONS\_AT\_THE\_VASCULAR\_WALL;REACTOME\_BASIGIN\_INTERACTIONS;REACTOME

.\_PATHWAY;REACTOME\_DNA\_REPAIR

PCR;REACTOME\_CLASS\_A1\_RHODOPSIN\_LIKE\_RECEPTORS;REACTOME\_EICOSANOID\_LIG/

.\_VITAMINS\_AND\_COFACTORS

.\_VITAMINS\_AND\_COFACTORS  
MUNICATION;REACTOME\_RESPONSE\_TO\_ELEVATED\_PLATELET\_CYTOSOLIC\_CA2\_;REACTO

.\_BREAK\_REPAIR;REACTOME\_DNA\_REPAIR

SIGNALLING\_PATHWAY\_VIA\_PKC\_AND\_MAPK;REACTOME\_SIGNALING\_BY\_GPCR;REACTOME

PHA\_BETA\_SIGNALING;REACTOME\_INTERFERON\_SIGNALING;REACTOME\_IMMUNE\_SYSTEM  
A\_BIOGENESIS;REACTOME\_REGULATORY\_RNA\_PATHWAYS

JH1\_TRANSMITS\_SIGNAL\_TO\_THE\_NUCLEUS;REACTOME\_SIGNALING\_BY\_NOTCH1;REACTO

NTIGEN\_PRESENTATION;REACTOME\_FACTORS\_INVOLVED\_IN\_MEGAKARYOCYTE\_DEVELOP

NGF;REACTOME\_SIGNALING\_BY\_SCF\_KIT;REACTOME\_DEVELOPMENTAL\_BIOLOGY;REACTO

JH1\_TRANSMITS\_SIGNAL\_TO\_THE\_NUCLEUS;REACTOME\_SIGNALING\_BY\_NOTCH4;REACTO  
NSCRIPTION\_INITIATION\_FROM\_TYPE\_2\_PROMOTER;REACTOME\_RNA\_POL\_III\_TRANSCRIP

E\_TRANSPORT\_OF\_SMALL\_MOLECULES;REACTOME\_ION\_TRANSPORT\_BY\_P\_TYPE\_ATPAS  
;REACTOME\_ADAPTIVE\_IMMUNE\_SYSTEM;REACTOME\_CLASS\_I\_MHC\_MEDIATED\_ANTIGEN  
;REACTOME\_ADAPTIVE\_IMMUNE\_SYSTEM;REACTOME\_CLASS\_I\_MHC\_MEDIATED\_ANTIGEN

CROSS\_CHEMICAL\_SYNAPSES;REACTOME\_NEURONAL\_SYSTEM;REACTOME\_NEUROTRAN

\_BIOLOGY;REACTOME\_AXON\_GUIDANCE;REACTOME\_ACTIVATION\_OF\_RAC;REACTOME\_SI  
GNALLING\_PATHWAY\_VIA\_PKC\_AND\_MAPK;REACTOME\_TRANSMISSION\_ACROSS\_CHEMICK  
\_BIOLOGY;REACTOME\_AXON\_GUIDANCE;REACTOME\_NCAM\_SIGNALING\_FOR\_NEURITE\_OI  
\_BIOLOGY;REACTOME\_AXON\_GUIDANCE;REACTOME\_NCAM\_SIGNALING\_FOR\_NEURITE\_OI

\_AMINO\_ACIDS\_AND\_DERIVATIVES



.\_BIOLOGY;REACTOME\_METABOLISM\_OF\_PROTEINS;REACTOME\_AXON\_GUIDANCE;REACTO  
SURFACE\_INTERACTIONS  
SURFACE\_INTERACTIONS

E\_TRANSPORT\_OF\_SMALL\_MOLECULES;REACTOME\_ION\_TRANSPORT\_BY\_P\_TYPE\_ATPAS

VAYS;REACTOME\_INSULIN\_SYNTHESIS\_AND\_PROCESSING  
E\_TRANSPORT\_OF\_SMALL\_MOLECULES;REACTOME\_PASSIVE\_TRANSPORT\_BY\_AQUAPORI

SURFACE\_INTERACTIONS

\_STEROID\_HORMONES\_AND\_VITAMINS\_A\_AND\_D;REACTOME\_BIOLOGICAL\_OXIDATIONS;RI

\_AMINO\_ACIDS\_AND\_DERIVATIVES

HO\_GTPASES;REACTOME\_SIGNALLING\_BY\_NGF;REACTOME\_NRAGE\_SIGNALS\_DEATH\_THF

E\_TRANSPORT\_OF\_SMALL\_MOLECULES;REACTOME\_SLC\_MEDIATED\_TRANSMEMBRANE\_TI

NGF;REACTOME\_DEVELOPMENTAL\_BIOLOGY;REACTOME\_SIGNALING\_BY\_NODAL

PCR;REACTOME\_GPCR\_DOWNSTREAM\_SIGNALING;REACTOME\_G\_ALPHA\_I\_SIGNALLING\_E

HO\_GTPASES

PCR;REACTOME\_PEPTIDE\_LIGAND\_BINDING\_RECEPTORS;REACTOME\_CLASS\_A1\_RHODOP  
ME\_CELL\_CYCLE;REACTOME\_CHROMOSOME\_MAINTENANCE;REACTOME\_MEIOTIC\_SYNAP

ACTOME\_SRP\_DEPENDENT\_COTRANSLATIONAL\_PROTEIN\_TARGETING\_TO\_MEMBRANE;RI  
\_PROTEIN\_IMPORT;REACTOME\_METABOLISM\_OF\_PROTEINS

.\_BIOLOGY;REACTOME\_MYOGENESIS

CRPTION\_PATHWAY

.\_BIOLOGY;REACTOME\_BMAL1\_CLOCK\_NPAS2\_ACTIVATES\_CIRCADIAN\_EXPRESSION;REAC  
.\_BIOLOGY;REACTOME\_BMAL1\_CLOCK\_NPAS2\_ACTIVATES\_CIRCADIAN\_EXPRESSION;REAC  
.\_BIOLOGY;REACTOME\_BMAL1\_CLOCK\_NPAS2\_ACTIVATES\_CIRCADIAN\_EXPRESSION;REAC  
NGF;REACTOME\_DAG\_AND\_IP3\_SIGNALING;REACTOME\_SIGNALING\_BY\_ERBB2;REACTOME

MMA\_SIGNALING;REACTOME\_INTERFERON\_SIGNALING;REACTOME\_IMMUNE\_SYSTEM;REA  
MMA\_SIGNALING;REACTOME\_INTERFERON\_SIGNALING;REACTOME\_IMMUNE\_SYSTEM;REA

Y)TEINS\_MEDIATED\_TRANSPORT;REACTOME\_TRANSMEMBRANE\_TRANSPORT\_OF\_SMALL\_M  
\_MRNA;REACTOME\_METABOLISM\_OF\_RNA;REACTOME\_NONSENSE\_MEDIATED\_DECAY\_ENI

OR\_SIGNALLING\_CASCADE;REACTOME\_PKB\_MEDIATED\_EVENTS;REACTOME\_SIGNALING\_E

PRESSION\_AND\_PROCESSING;REACTOME\_PRE\_NOTCH\_PROCESSING\_IN\_GOLGI;REACTOM

INTERACTIONS\_AT\_THE\_VASCULAR\_WALL;REACTOME\_INTEGRIN\_CELL\_SURFACE\_INTERA  
Cription\_Pathway

WDOWN\_GLYCOGENOLYSIS;REACTOME\_METABOLISM\_OF\_CARBOHYDRATES;REACTOME\_

\_NON\_CODING\_RNA;REACTOME\_ANTIVIRAL\_MECHANISM\_BY\_IFN\_STIMULATED\_GENES;RE  
\_NON\_CODING\_RNA;REACTOME\_ANTIVIRAL\_MECHANISM\_BY\_IFN\_STIMULATED\_GENES;RE  
LIPID\_TRANSPORT;REACTOME\_METABOLISM\_OF\_LIPIDS\_AND\_LIPOPROTEINS;REACTOME\_I

E\_TRANSPORT\_OF\_SMALL\_MOLECULES;REACTOME\_SLC\_MEDIATED\_TRANSMEMBRANE\_TI

E\_TRANSPORT\_OF\_SMALL\_MOLECULES;REACTOME\_SLC\_MEDIATED\_TRANSMEMBRANE\_TI  
ME\_CELL\_CYCLE;REACTOME\_CHROMOSOME\_MAINTENANCE;REACTOME\_MEIOTIC\_SYNAP

SURFACE\_INTERACTIONS;REACTOME\_P130CAS\_LINKAGE\_TO\_MAPK\_SIGNALING\_FOR\_INTE  
TES\_B\_CELL\_RECEPTOR\_LEADING\_TO\_GENERATION\_OF\_SECOND\_MESSENGERS;REACTC  
SCRIPTION\_TERMINATION;REACTOME\_RNA\_POL\_I\_TRANSCRIPTION;REACTOME\_TRANSCF

\_LIPIDS\_AND\_LIPOPROTEINS;REACTOME\_CHOLESTEROL\_BIOSYNTHESIS

\_CAPPED\_INTRON\_CONTAINING\_PRE\_MRNA;REACTOME\_MRNA\_PROCESSING;REACTOME\_

\_MRNA;REACTOME\_METABOLISM\_OF\_RNA;REACTOME\_NONSENSE\_MEDIATED\_DECAY\_ENI  
\_MRNA;REACTOME\_METABOLISM\_OF\_RNA;REACTOME\_NONSENSE\_MEDIATED\_DECAY\_ENI

CROSS\_CHEMICAL\_SYNAPSES;REACTOME\_NEURONAL\_SYSTEM;REACTOME\_NEUROTRAN  
;REACTOME\_ADAPTIVE\_IMMUNE\_SYSTEM;REACTOME\_CLASS\_I\_MHC\_MEDIATED\_ANTIGEN

E\_TRANSPORT\_OF\_SMALL\_MOLECULES;REACTOME\_SLC\_MEDIATED\_TRANSMEMBRANE\_T

A\_BIOGENESIS;REACTOME\_REGULATORY\_RNA\_PATHWAYS;REACTOME\_PROCESSING\_OF

METABOLISM;REACTOME\_SYNTHESIS\_OF\_PIPS\_AT\_THE\_PLASMA\_MEMBRANE;REACTOME\_I

THESIS;REACTOME\_HEPARAN\_SULFATE\_HEPARIN\_HS\_GAG\_METABOLISM;REACTOME\_GLY

\_BIOLOGY;REACTOME\_BMAL1\_CLOCK\_NPAS2\_ACTIVATES\_CIRCADIAN\_EXPRESSION;REAC

\_BIOLOGY;REACTOME\_BMAL1\_CLOCK\_NPAS2\_ACTIVATES\_CIRCADIAN\_EXPRESSION;REAC

TLR3\_SIGNALING;REACTOME\_MAP\_KINASE\_ACTIVATION\_IN\_TLR\_CASCADE;REACTOME\_AC

TION\_OF\_HOMO\_SAPIENS\_WITH\_MYCOBACTERIUM\_TUBERCULOSIS;REACTOME\_NITRIC\_OXID

E\_TRANSPORT\_OF\_SMALL\_MOLECULES;REACTOME\_SLC\_MEDIATED\_TRANSMEMBRANE\_T

E\_TRANSPORT\_OF\_SMALL\_MOLECULES;REACTOME\_SLC\_MEDIATED\_TRANSMEMBRANE\_T

EGFR\_IN\_DISEASE;REACTOME\_SIGNALING\_BY\_FGFR1\_MUTANTS;REACTOME\_SIGNALING\_BY

VEGF;REACTOME\_DEVELOPMENTAL\_BIOLOGY;REACTOME\_NEF\_MEDIATES\_DOWN\_MODULA

\_BIOLOGY;REACTOME\_TRANSMISSION\_ACROSS\_CHEMICAL\_SYNAPSES;REACTOME\_NEUR

ACTOME\_SRP\_DEPENDENT\_COTRANSLATIONAL\_PROTEIN\_TARGETING\_TO\_MEMBRANE;RE

.\_BIOLOGY;REACTOME\_DOWNREGULATION\_OF\_ERBB2\_ERBB3\_SIGNALING;REACTOME\_SIC  
PCR;REACTOME\_PEPTIDE\_LIGAND\_BINDING\_RECEPTORS;REACTOME\_CLASS\_A1\_RHODOF

NGF;REACTOME\_SIGNALING\_BY\_SCF\_KIT;REACTOME\_GROWTH\_HORMONE\_RECEPTOR\_SI  
NGF;REACTOME\_SIGNALING\_BY\_SCF\_KIT;REACTOME\_GROWTH\_HORMONE\_RECEPTOR\_SI  
NGF;REACTOME\_SIGNALING\_BY\_SCF\_KIT;REACTOME\_GROWTH\_HORMONE\_RECEPTOR\_SI  
TOTHENATE\_METABOLISM;REACTOME\_METABOLISM\_OF\_VITAMINS\_AND\_COFACTORS

CROSS\_CHEMICAL\_SYNAPSES;REACTOME\_NEURONAL\_SYSTEM;REACTOME\_NEUROTRAN  
;REACTOME\_ADAPTIVE\_IMMUNE\_SYSTEM;REACTOME\_CLASS\_I\_MHC\_MEDIATED\_ANTIGEN

.\_BIOLOGY;REACTOME\_EXTRACELLULAR\_MATRIX\_ORGANIZATION;REACTOME\_CELL\_SURF

ME\_FACTORS\_INVOLVED\_IN\_MEGAKARYOCYTE\_DEVELOPMENT\_AND\_PLATELET\_PRODUC

ONE\_RECEPTOR\_SIGNALING;REACTOME\_SIGNALING\_BY\_ERBB4;REACTOME\_PROLACTIN\_R  
.\_BIOLOGY;REACTOME\_AXON\_GUIDANCE;REACTOME\_L1CAM\_INTERACTIONS;REACTOME\_I

TERS\_IN\_LIPID\_HOMEOSTASIS;REACTOME\_ABC\_FAMILY\_PROTEINS\_MEDIATED\_TRANSPO

OR\_SIGNALLING\_CASCADE;REACTOME\_REGULATION\_OF\_AMPK\_ACTIVITY\_VIA\_LKB1;REAC

TOTHENATE\_METABOLISM;REACTOME\_METABOLISM\_OF\_VITAMINS\_AND\_COFACTORS;REA  
TOTHENATE\_METABOLISM;REACTOME\_METABOLISM\_OF\_VITAMINS\_AND\_COFACTORS;REA

NGF;REACTOME\_NGF\_SIGNALLING\_VIA\_TRKA\_FROM\_THE\_PLASMA\_MEMBRANE;REACTOMI  
CTOME\_CELL\_CYCLE\_MITOTIC;REACTOME\_MITOTIC\_M\_M\_G1\_PHASES;REACTOME\_DNA\_R

CTOME\_CELL\_CYCLE\_MITOTIC;REACTOME\_RECRUITMENT\_OF\_MITOTIC\_CENTROSOME\_PI  
PCR;REACTOME\_PEPTIDE\_LIGAND\_BINDING\_RECEPTORS;REACTOME\_CLASS\_A1\_RHODOF

MUNICATION;REACTOME\_CELL\_JUNCTION\_ORGANIZATION

E\_TRANSPORT\_OF\_SMALL\_MOLECULES;REACTOME\_AQUAPORIN\_MEDIATED\_TRANSPORT;

E\_TRANSPORT\_OF\_SMALL\_MOLECULES;REACTOME\_ION\_TRANSPORT\_BY\_P\_TYPE\_ATPAS

BOLISM\_AND\_CITRIC\_ACID\_TCA\_CYCLE;REACTOME\_TCA\_CYCLE\_AND\_RESPIRATORY\_ELE  
REACTOME\_RNA\_POL\_I\_RNA\_POL\_III\_AND\_MITOCHONDRIAL\_TRANSCRIPTION

REACTOME\_RNA\_POL\_I\_RNA\_POL\_III\_AND\_MITOCHONDRIAL\_TRANSCRIPTION

\_CAPPED\_INTRON\_CONTAINING\_PRE\_MRNA;REACTOME\_MRNA\_PROCESSING;REACTOME\_

HO\_GTPASES

NSCRIPTION\_INITIATION\_FROM\_TYPE\_2\_PROMOTER;REACTOME\_MICRORNA\_MIRNA\_BIOG

PCR;REACTOME\_CLASS\_A1\_RHODOPSIN\_LIKE\_RECEPTORS;REACTOME\_GPCR\_DOWNSTR

HO\_GTPASES;REACTOME\_SIGNALLING\_BY\_NGF;REACTOME\_SIGNALING\_BY\_SCF\_KIT;REAC  
HO\_GTPASES;REACTOME\_SIGNALLING\_BY\_NGF;REACTOME\_TGF\_BETA\_RECEPTOR\_SIGNA

.COUPLED\_NER\_TC\_NER;REACTOME\_NUCLEOTIDE\_EXCISION\_REPAIR;REACTOME\_FORMA  
.COUPLED\_NER\_TC\_NER;REACTOME\_NUCLEOTIDE\_EXCISION\_REPAIR;REACTOME\_FORMA

)SYLATION\_OF\_MUCINS;REACTOME\_TERMINATION\_OF\_O\_GLYCAN\_BIOSYNTHESIS;REACTO  
)SYLATION\_OF\_MUCINS;REACTOME\_TERMINATION\_OF\_O\_GLYCAN\_BIOSYNTHESIS;REACTO  
)SYLATION\_OF\_MUCINS;REACTOME\_TERMINATION\_OF\_O\_GLYCAN\_BIOSYNTHESIS;REACTO

ANISM\_BY\_IFN\_STIMULATED\_GENES;REACTOME\_INTERFERON\_SIGNALING;REACTOME\_NE



SIGNALLING\_PATHWAY\_VIA\_PKC\_AND\_MAPK;REACTOME\_SIGNALING\_BY\_GPCR;REACTOME  
ORY\_INTERACTIONS\_BETWEEN\_A\_LYMPHOID\_AND\_A\_NON\_LYMPHOID\_CELL;REACTOME\_  
S;REACTOME\_INTERFERON\_ALPHA\_BETA\_SIGNALING;REACTOME\_REGULATION\_OF\_IFNA\_

\_LIPIDS\_AND\_LIPOPROTEINS;REACTOME\_LIPID\_DIGESTION\_MOBILIZATION\_AND\_TRANSP  
\_LIPIDS\_AND\_LIPOPROTEINS;REACTOME\_LIPID\_DIGESTION\_MOBILIZATION\_AND\_TRANSP  
/ED\_IN\_MEGAKARYOCYTE\_DEVELOPMENT\_AND\_PLATELET\_PRODUCTION;REACTOME\_HEM

NGF;REACTOME\_DAG\_AND\_IP3\_SIGNALING;REACTOME\_CELL\_CYCLE;REACTOME\_SIGNALIN  
PCR;REACTOME\_OLFACTORY\_SIGNALING\_PATHWAY;REACTOME\_GPCR\_DOWNSTREAM\_S  
GFR\_IN\_CANCER;REACTOME\_EGFR\_DOWNREGULATION  
HO\_GTPASES

PCR;REACTOME\_OPIOID\_SIGNALLING;REACTOME\_DARPP\_32\_EVENTS;REACTOME\_GPCR\_I

CRIPION\_PATHWAY

CTOME\_GLUCONEOGENESIS;REACTOME\_METABOLISM\_OF\_CARBOHYDRATES;REACTOME

CRIPION\_PATHWAY

\_CAPPED\_INTRON\_CONTAINING\_PRE\_MRNA;REACTOME\_MRNA\_PROCESSING;REACTOME\_

\_CAPPED\_INTRON\_CONTAINING\_PRE\_MRNA;REACTOME\_MRNA\_PROCESSING;REACTOME\_  
\_BIOLOGY;REACTOME\_TGF\_BETA\_RECEPTOR\_SIGNALING\_IN\_EMT\_EPITHELIAL\_TO\_MESEI  
NGF;REACTOME\_P75\_NTR\_RECEPTOR\_MEDIATED\_SIGNALLING;REACTOME\_SIGNALING\_BY

CRIPION\_PATHWAY  
CRIPION\_PATHWAY

\_PROTEIN\_IMPORT;REACTOME\_METABOLISM\_OF\_PROTEINS  
SIGNALLING\_PATHWAY\_VIA\_PKC\_AND\_MAPK;REACTOME\_SIGNALING\_BY\_GPCR;REACTOME

E\_TRANSPORT\_OF\_SMALL\_MOLECULES;REACTOME\_SLC\_MEDIATED\_TRANSMEMBRANE\_TI

NOVO\_BIOSYNTHESIS;REACTOME\_PHOSPHOLIPID\_METABOLISM;REACTOME\_SPHINGOLI

\_CAPPED\_INTRON\_CONTAINING\_PRE\_MRNA;REACTOME\_MRNA\_PROCESSING;REACTOME\_  
\_CAPPED\_INTRON\_CONTAINING\_PRE\_MRNA;REACTOME\_MRNA\_PROCESSING;REACTOME\_

\_BIOLOGY;REACTOME\_AXON\_GUIDANCE;REACTOME\_SEMA4D\_IN\_SEMAPHORIN\_SIGNALIN  
CRIPION\_PATHWAY;REACTOME\_NUCLEAR\_RECEPTOR\_TRANSCRIPTION\_PATHWAY  
REPAIR;REACTOME\_RESOLUTION\_OF\_AP\_SITES\_VIA\_THE\_MULTIPLE\_NUCLEOTIDE\_PATCH  
REPAIR;REACTOME\_RESOLUTION\_OF\_AP\_SITES\_VIA\_THE\_MULTIPLE\_NUCLEOTIDE\_PATCH  
REPAIR;REACTOME\_RESOLUTION\_OF\_AP\_SITES\_VIA\_THE\_MULTIPLE\_NUCLEOTIDE\_PATCH

\_E\_CONTRACTION;REACTOME\_MUSCLE\_CONTRACTION

\_E\_CONTRACTION;REACTOME\_MUSCLE\_CONTRACTION

CROSS\_CHEMICAL\_SYNAPSES;REACTOME\_NEURONAL\_SYSTEM;REACTOME\_NEUROTRAN

ORY\_INTERACTIONS\_BETWEEN\_A\_LYMPHOID\_AND\_A\_NON\_LYMPHOID\_CELL;REACTOME\_

\_ENERGY\_METABOLISM;REACTOME\_REGULATION\_OF\_INSULIN\_SECRETION

CRPTION\_PATHWAY

CRPTION\_PATHWAY

CRPTION\_PATHWAY

MUNICATION;REACTOME\_CELL\_SURFACE\_INTERACTIONS\_AT\_THE\_VASCULAR\_WALL;REAC

\_TRIC\_CCT\_WITH\_TARGET\_PROTEINS\_DURING\_BIOSYNTHESIS;REACTOME\_PROTEIN\_FOL

\_BIOLOGY;REACTOME\_AXON\_GUIDANCE;REACTOME\_NCAM1\_INTERACTIONS;REACTOME\_

\_PROTEINS;REACTOME\_POST\_TRANSLATIONAL\_MODIFICATION\_SYNTHESIS\_OF\_GPI\_ANCH

CTOME\_CELL\_CYCLE\_MITOTIC;REACTOME\_RECRUITMENT\_OF\_MITOTIC\_CENTROSOME\_PI  
\_VITAMINS\_AND\_COFACTORS

CROSS\_CHEMICAL\_SYNAPSES;REACTOME\_NEURONAL\_SYSTEM;REACTOME\_NEUROTRAN

NGF;REACTOME\_DEVELOPMENTAL\_BIOLOGY;REACTOME\_DAG\_AND\_IP3\_SIGNALING;REACT

E\_TRANSPORT\_OF\_SMALL\_MOLECULES;REACTOME\_SLC\_MEDIATED\_TRANSMEMBRANE\_T  
E\_TRANSPORT\_OF\_SMALL\_MOLECULES;REACTOME\_SLC\_MEDIATED\_TRANSMEMBRANE\_T  
EM;REACTOME\_VOLTAGE\_GATED\_POTASSIUM\_CHANNELS;REACTOME\_POTASSIUM\_CHAN  
E\_TRANSPORT\_OF\_SMALL\_MOLECULES;REACTOME\_ION\_TRANSPORT\_BY\_P\_TYPE\_ATPAS

PCR;REACTOME\_INTEGRATION\_OF\_ENERGY\_METABOLISM;REACTOME\_TRANSMEMBRANE  
PCR;REACTOME\_INTEGRATION\_OF\_ENERGY\_METABOLISM;REACTOME\_TRANSMEMBRANE  
ME\_CELL\_CYCLE;REACTOME\_CHROMOSOME\_MAINTENANCE;REACTOME\_MEIOTIC\_SYNAP  
\_BIOLOGY;REACTOME\_EXTRACELLULAR\_MATRIX\_ORGANIZATION;REACTOME\_COLLAGEN\_  
\_BIOLOGY;REACTOME\_EXTRACELLULAR\_MATRIX\_ORGANIZATION;REACTOME\_COLLAGEN\_  
TRANSPORT;REACTOME\_MEMBRANE\_TRAFFICKING;REACTOME\_DIABETES\_PATHWAYS;RE

INTERACTIONS\_AT\_THE\_VASCULAR\_WALL;REACTOME\_INTEGRIN\_CELL\_SURFACE\_INTERA  
TLR3\_SIGNALING;REACTOME\_RIP\_MEDIATED\_NFKB\_ACTIVATION\_VIA\_DAI;REACTOME\_GAS

METABOLISM;REACTOME\_SYNTHESIS\_OF\_PIP3\_AT\_THE\_PLASMA\_MEMBRANE;REACTOME\_I  
PHA\_BETA\_SIGNALING;REACTOME\_REGULATION\_OF\_IFNA\_SIGNALING;REACTOME\_INTERFI  
HO\_GTPASES;REACTOME\_SIGNALLING\_BY\_NGF;REACTOME\_NRAGE\_SIGNALS\_DEATH\_THF

MUNICATION;REACTOME\_DSCAM\_INTERACTIONS  
MUNICATION;REACTOME\_DSCAM\_INTERACTIONS  
MUNICATION;REACTOME\_DSCAM\_INTERACTIONS  
MUNICATION;REACTOME\_DSCAM\_INTERACTIONS

\_CAPPED\_INTRON\_CONTAINING\_PRE\_MRNA;REACTOME\_TRANSPORT\_OF\_MATURE\_TRAN

ORY\_INTERACTIONS\_BETWEEN\_A\_LYMPHOID\_AND\_A\_NON\_LYMPHOID\_CELL;REACTOME\_  
\_VITAMINS\_AND\_COFACTORS  
\_BIOLOGY;REACTOME\_EXTRACELLULAR\_MATRIX\_ORGANIZATION;REACTOME\_COLLAGEN\_  
\_AMINO\_ACIDS\_AND\_DERIVATIVES

CTOME\_CELL\_CYCLE\_MITOTIC;REACTOME\_RECRUITMENT\_OF\_MITOTIC\_CENTROSOME\_PI

'IPS\_AT\_THE\_GOLGI\_MEMBRANE;REACTOME\_PHOSPHOLIPID\_METABOLISM;REACTOME\_PI

NGF;REACTOME\_NGF\_SIGNALLING\_VIA\_TRKA\_FROM\_THE\_PLASMA\_MEMBRANE;REACTOME  
\_METABOLISM;REACTOME\_METABOLISM\_OF\_NUCLEOTIDES;REACTOME\_PYRIMIDINE\_METABOLI  
\_ATIONS;REACTOME\_GLUTATHIONE\_CONJUGATION;REACTOME\_PHASE\_II\_CONJUGATION

THE\_PRE\_REPLICATIVE\_COMPLEX;REACTOME\_CELL\_CYCLE;REACTOME\_ORC1\_REMOVAL\_  
\_BIOLOGY;REACTOME\_AXON\_GUIDANCE;REACTOME\_SEMA4D\_IN\_SEMAPHORIN\_SIGNALIN

S;REACTOME\_IL\_3\_5\_AND\_GM-CSF\_SIGNALING;REACTOME\_IL\_RECEPTOR\_SHC\_SIGNALIN

MODELLING\_OF\_PC;REACTOME\_PHOSPHOLIPID\_METABOLISM;REACTOME\_ACYL\_CHAIN\_RE  
/ED\_IN\_MEGAKARYOCYTE\_DEVELOPMENT\_AND\_PLATELET\_PRODUCTION;REACTOME\_HEN

CROSS\_CHEMICAL\_SYNAPSES;REACTOME\_NEURONAL\_SYSTEM;REACTOME\_NEUROTRAN  
CROSS\_CHEMICAL\_SYNAPSES;REACTOME\_NEURONAL\_SYSTEM;REACTOME\_NEUROTRAN

\_BIOLOGY;REACTOME\_AXON\_GUIDANCE;REACTOME\_NCAM1\_INTERACTIONS;REACTOME\_  
.NSCRIPTION\_AND\_TRANSLATION;REACTOME\_PRE\_NOTCH\_EXPRESSION\_AND\_PROCESSIN  
SIGNALLING\_PATHWAY\_VIA\_PKC\_AND\_MAPK;REACTOME\_SIGNALING\_BY\_GPCR;REACTOME  
NSCRIPTION\_INITIATION\_FROM\_TYPE\_2\_PROMOTER;REACTOME\_RNA\_POL\_III\_TRANSCRIP  
NSCRIPTION\_INITIATION\_FROM\_TYPE\_2\_PROMOTER;REACTOME\_RNA\_POL\_III\_TRANSCRIP  
CTOME\_CELL\_CYCLE\_MITOTIC;REACTOME\_MITOTIC\_M\_M\_G1\_PHASES;REACTOME\_DNA\_R

METABOLISM;REACTOME\_GLYCEROPHOSPHOLIPID\_BIOSYNTHESIS;REACTOME\_METABOLIS

ME\_CELL\_CYCLE;REACTOME\_CHROMOSOME\_MAINTENANCE;REACTOME\_MEIOTIC\_SYNAP

EM  
EM

RBOXYLATION\_HYPUSINE\_FORMATION\_AND\_ARYLSULFATASE\_ACTIVATION;REACTOME\_GL

IOSYNTHESIS;REACTOME\_METABOLISM\_OF\_LIPIDS\_AND\_LIPOPROTEINS;REACTOME\_FATT  
IOSYNTHESIS;REACTOME\_METABOLISM\_OF\_LIPIDS\_AND\_LIPOPROTEINS;REACTOME\_FATT  
\_E\_CONTRACTION;REACTOME\_MUSCLE\_CONTRACTION

LATORS\_OF\_RIG\_I\_MDA5\_SIGNALING;REACTOME\_RIG\_I\_MDA5\_MEDIATED\_INDUCTION\_OF\_

NGF;REACTOME\_NRAGE\_SIGNALS\_DEATH\_THROUGH\_JNK;REACTOME\_REGULATION\_OF\_A

ME\_CELL\_CYCLE;REACTOME\_PROCESSING\_OF\_CAPPED\_INTRON\_CONTAINING\_PRE\_MRN.  
;REACTOME\_ADAPTIVE\_IMMUNE\_SYSTEM;REACTOME\_CLASS\_I\_MHC\_MEDIATED\_ANTIGEN

HO\_GTPASES;REACTOME\_SIGNALLING\_BY\_NGF;REACTOME\_NRAGE\_SIGNALS\_DEATH\_THF

HO\_GTPASES

.\_BIOLOGY;REACTOME\_PPARA\_ACTIVATES\_GENE\_EXPRESSION;REACTOME\_GENERIC\_TRA/  
FFICKING;REACTOME\_GAP\_JUNCTION\_TRAFFICKING;REACTOME\_GAP\_JUNCTION\_ASSEMBI

CELLULAR\_DOMAIN\_REGULATES\_TRANSCRIPTION;REACTOME\_SIGNALING\_BY\_NOTCH1;REA  
KDOWN\_GLYCOGENOLYSIS;REACTOME\_METABOLISM\_OF\_CARBOHYDRATES;REACTOME\_

IOSYNTHESIS;REACTOME\_FATTY\_ACYL\_COA\_BIOSYNTHESIS;REACTOME\_METABOLISM\_OF

JATION;REACTOME\_CHONDROITIN\_SULFATE\_DERMATAN\_SULFATE\_METABOLISM;REACTO  
E\_TRANSPORT\_OF\_SMALL\_MOLECULES;REACTOME\_SLC\_MEDIATED\_TRANSMEMBRANE\_TI

E\_TRANSPORT\_OF\_SMALL\_MOLECULES;REACTOME\_ION\_TRANSPORT\_BY\_P\_TYPE\_ATPAS

CTION;REACTOME\_CHONDROITIN\_SULFATE\_BIOSYNTHESIS;REACTOME\_CHONDROITIN\_SUI  
E\_TRANSPORT\_OF\_SMALL\_MOLECULES;REACTOME\_PLATELET\_HOMEOSTASIS;REACTOME  
ACTOME\_SRP\_DEPENDENT\_COTRANSLATIONAL\_PROTEIN\_TARGETING\_TO\_MEMBRANE;RI  
\_BIOLOGY;REACTOME\_CELL\_SURFACE\_INTERACTIONS\_AT\_THE\_VASCULAR\_WALL;REACT  
\_BIOLOGY;REACTOME\_CELL\_SURFACE\_INTERACTIONS\_AT\_THE\_VASCULAR\_WALL;REACT

\_CARBOHYDRATES

CTOME\_CHROMOSOME\_MAINTENANCE;REACTOME\_TELOMERE\_MAINTENANCE;REACTOMI

\_AMINO\_ACIDS\_AND\_DERIVATIVES

ANISM\_BY\_IFN\_STIMULATED\_GENES;REACTOME\_INTERFERON\_SIGNALING;REACTOME\_IMI



ATION;REACTOME\_HEPARAN\_SULFATE\_HEPARIN\_HS\_GAG\_METABOLISM;REACTOME\_GLY  
CTOME\_CELL\_CYCLE\_MITOTIC;REACTOME\_RECRUITMENT\_OF\_MITOTIC\_CENTROSOME\_PI

SH1\_TRANSMITS\_SIGNAL\_TO\_THE\_NUCLEUS;REACTOME\_SIGNALING\_BY\_NOTCH4;REACTO

CTOME\_MHC\_CLASS\_II\_ANTIGEN\_PRESENTATION;REACTOME\_CELL\_CYCLE\_MITOTIC;REA

.E\_CONTRACTION;REACTOME\_MUSCLE\_CONTRACTION

\_MATRIX\_ORGANIZATION;REACTOME\_COLLAGEN\_FORMATION

\_BIOLOGY;REACTOME\_AXON\_GUIDANCE;REACTOME\_NCAM\_SIGNALING\_FOR\_NEURITE\_OI  
PCR;REACTOME\_PEPTIDE\_LIGAND\_BINDING\_RECEPTORS;REACTOME\_CLASS\_A1\_RHODOF

PCR;REACTOME\_CLASS\_B\_2\_SECRETIN\_FAMILY\_RECEPTORS;REACTOME\_GPCR\_LIGAND\_

ACID\_METABOLISM;REACTOME\_METABOLISM\_OF\_AMINO\_ACIDS\_AND\_DERIVATIVES;REACT

TERS\_IN\_LIPID\_HOMEOSTASIS;REACTOME\_ABC\_FAMILY\_PROTEINS\_MEDIATED\_TRANSPOR

E\_TRANSPORT\_OF\_SMALL\_MOLECULES;REACTOME\_SLC\_MEDIATED\_TRANSMEMBRANE\_TRANSPORT;  
\_PROTEIN\_IMPORT;REACTOME\_METABOLISM\_OF\_PROTEINS

REACTOME\_CELL\_CYCLE\_MITOTIC;REACTOME\_RECRUITMENT\_OF\_MITOTIC\_CENTROSOME\_P1  
CTOME\_CELL\_CYCLE\_MITOTIC;REACTOME\_RECRUITMENT\_OF\_MITOTIC\_CENTROSOME\_P1

WAY\_FOR\_APOPTOSIS;REACTOME\_APOPTOSIS  
NGF;REACTOME\_SIGNALING\_BY\_SCF\_KIT;REACTOME\_CELL\_CELL\_COMMUNICATION;REACTOME

ATIONS;REACTOME\_CYTOCHROME\_P450\_ARRANGED\_BY\_SUBSTRATE\_TYPE;REACTOME\_C  
PHOSPHOLIPID\_AT\_THE\_EARLY\_ENDOSOME\_MEMBRANE;REACTOME\_PHOSPHOLIPID\_METABOLISM;REACTOME

SIGNALING\_PATHWAY\_VIA\_PKC\_AND\_MAPK;REACTOME\_SIGNALING\_BY\_GPCR;REACTOME

PHAGOCYTOSIS;REACTOME\_HYALURONAN\_METABOLISM;REACTOME\_GLYCOSYLATION

DOWNREGULATION\_OF\_MHC\_CLASS\_I\_COMPLEX\_CELL\_SURFACE\_EXPRESSION;REACTOME

PHAGOCYTOSIS;REACTOME\_CELL\_CELL\_COMMUNICATION;REACTOME\_CELL\_CELL\_COMMUNICATION

CTOME\_METABOLISM\_OF\_CARBOHYDRATES;REACTOME\_GLUCOSE\_METABOLISM

JN\_OF\_HOMO\_SAPIENS\_WITH\_MYCOBACTERIUM\_TUBERCULOSIS;REACTOME\_NITRIC\_OXII

NGF;REACTOME\_SIGNALING\_BY\_SCF\_KIT;REACTOME\_DEVELOPMENTAL\_BIOLOGY;REACTC

'\_5\_TO\_3\_EXORIBONUCLEASE;REACTOME\_METABOLISM\_OF\_MRNA;REACTOME\_DEADENYL  
\_CAPPED\_INTRON\_CONTAINING\_PRE\_MRNA;REACTOME\_MRNA\_PROCESSING;REACTOME\_  
CRIPTION\_PATHWAY

METABOLISM;REACTOME\_GLYCEROPHOSPHOLIPID\_BIOSYNTHESIS;REACTOME\_METABOLIS

RBOXYLATION\_HYPUSINE\_FORMATION\_AND\_ARYLSULFATASE\_ACTIVATION;REACTOME\_GL

\_BIOLOGY;REACTOME\_MHC\_CLASS\_II\_ANTIGEN\_PRESENTATION;REACTOME\_AXON\_GUIDA

CROSS\_CHEMICAL\_SYNAPSES;REACTOME\_NEURONAL\_SYSTEM;REACTOME\_NEUROTRAN  
NGF;REACTOME\_TRIF\_MEDIATED\_TLR3\_SIGNALING;REACTOME\_P75NTR\_RECRUITS\_SIGNA

\_MATRIX\_ORGANIZATION;REACTOME\_COLLAGEN\_FORMATION  
ATION\_OF\_SOLUBLE\_EXOGENOUS\_ANTIGENS\_ENDOSOMES;REACTOME\_ANTIGEN\_PROCE

\_BIOLOGY;REACTOME\_CELL\_CELL\_COMMUNICATION;REACTOME\_AXON\_GUIDANCE;REAC

VAYS;REACTOME\_REGULATION\_OF\_INSULIN\_LIKE\_GROWTH\_FACTOR\_IGF\_ACTIVITY\_BY\_IN

PCR;REACTOME\_CLASS\_A1\_RHODOPSIN\_LIKE\_RECEPTORS;REACTOME\_AMINE\_LIGAND\_B

DESCRIPTION;REACTOME\_TRANSCRIPTION;REACTOME\_RNA\_POL\_I\_RNA\_POL\_III\_AND\_MITOCHONDRIAL

TRANSCRIPTION;REACTOME\_PPARA\_ACTIVATES\_GENE\_EXPRESSION;REACTOME\_METABOLISM

AND\_TRANSPORT;REACTOME\_ABC\_FAMILY\_PROTEINS\_MEDIATED\_TRANSPORT;REACTOME

CELL\_CYCLE\_MITOTIC;REACTOME\_RECRUITMENT\_OF\_MITOTIC\_CENTROSOME\_PIVOTAL

REGULATION\_OF\_CELLULAR\_PROTEINS;REACTOME\_DEVELOPMENTAL\_BIOLOGY;REACTOME\_CELL

CYCLE\_FOR\_APOPTOSIS;REACTOME\_TRAF6\_MEDIATED\_IRF7\_ACTIVATION;REACTOME\_TRAF6

SURFACE\_INTERACTIONS

REGULATION\_OF\_FGFR\_SIGNALING;REACTOME\_INSULIN\_RECEPTOR\_SIGNALLING\_CASCADE;REACTOME

CELL\_CYCLE\_MITOTIC;REACTOME\_SIGNALING\_BY\_NGF;REACTOME\_DEVELOPMENTAL\_BIOLOGY;REACTOME

CELL\_CYCLE\_MITOTIC;REACTOME\_INTERFERON\_ALPHA\_BETA\_SIGNALING;REACTOME\_INTERFERON\_ALPHA\_BETA

SIGNALING;REACTOME\_ORC1\_REMOVAL\_FROM\_CHROMATIN;REACTOME\_CELL\_CYCLE\_MITOTIC;REACTOME

INSULIN\_SYNTHESIS\_AND\_PROCESSING

TRANSPORT\_OF\_SMALL\_MOLECULES;REACTOME\_SLC\_MEDIATED\_TRANSMEMBRANE\_TRANSPORT

NEURONAL\_SYSTEM;REACTOME\_CROSS\_CHEMICAL\_SYNAPSES;REACTOME\_NEURONAL\_SYSTEM;REACTOME\_INTEGRATION

OLFACTORY\_SIGNALING\_PATHWAY;REACTOME\_GPCR\_DOWNSTREAM\_SIGNALING

POTASSIUM\_CHANNELS

CELL\_CYCLE\_MITOTIC;REACTOME\_RECRUITMENT\_OF\_MITOTIC\_CENTROSOME\_PIVOTAL

E\_TRANSPORT\_OF\_SMALL\_MOLECULES;REACTOME\_SLC\_MEDIATED\_TRANSMEMBRANE\_TI

NGF;REACTOME\_TRIF\_MEDIATED\_TLR3\_SIGNALING;REACTOME\_P75NTR\_RECRUITS\_SIGNA

NSCRIPTION;REACTOME\_TRANSCRIPTION;REACTOME\_RNA\_POL\_I\_RNA\_POL\_III\_AND\_MITC

HO\_GTPASES;REACTOME\_SIGNALLING\_BY\_NGF;REACTOME\_DEVELOPMENTAL\_BIOLOGY;R  
ACTOME\_METABOLISM\_OF\_PROTEINS

MUNICATION;REACTOME\_ADHERENS\_JUNCTIONS\_INTERACTIONS;REACTOME\_CELL\_CELL\_

IPPO  
IPPO

NGF;REACTOME\_NGF\_SIGNALLING\_VIA\_TRKA\_FROM\_THE\_PLASMA\_MEMBRANE;REACTOME

E\_TRANSPORT\_OF\_SMALL\_MOLECULES;REACTOME\_SLC\_MEDIATED\_TRANSMEMBRANE\_T

ACTOME\_FORMATION\_OF\_THE\_TERNARY\_COMPLEX\_AND\_SUBSEQUENTLY\_THE\_43S\_COM  
E\_TRANSPORT\_OF\_SMALL\_MOLECULES;REACTOME\_ION\_TRANSPORT\_BY\_P\_TYPE\_ATPAS  
METABOLISM;REACTOME\_GLYCOSAMINOGLYCAN\_METABOLISM;REACTOME\_ABC\_FAMILY\_PF  
E\_TRANSPORT\_OF\_SMALL\_MOLECULES;REACTOME\_ION\_CHANNEL\_TRANSPORT;REACTOM

CEPTOR\_INTERACTIONS;REACTOME\_RESPONSE\_TO\_ELEVATED\_PLATELET\_CYTOSOLIC\_C

IOSYNTHESIS;REACTOME\_FATTY\_ACYL\_COA\_BIOSYNTHESIS;REACTOME\_METABOLISM\_OF

\_BIOLOGY;REACTOME\_REGULATION\_OF\_APOPTOSIS;REACTOME\_AXON\_GUIDANCE;REAC

SSING\_CROSS\_PRESENTATION;REACTOME\_ENDOSOMAL\_VACUOLAR\_PATHWAY;REACTOM

\_MATRIX\_ORGANIZATION;REACTOME\_COLLAGEN\_FORMATION

METABOLISM;REACTOME\_SYNTHESIS\_OF\_PIP2\_AT\_THE\_PLASMA\_MEMBRANE;REACTOME\_I

\_PROTEINS;REACTOME\_POST\_TRANSLATIONAL\_PROTEIN\_MODIFICATION;REACTOME\_ASP  
RBB4;REACTOME\_NUCLEAR\_SIGNALING\_BY\_ERBB4;REACTOME\_SIGNALING\_BY\_GPCR;REA

EM;REACTOME\_TANDEM\_PORE\_DOMAIN\_POTASSIUM\_CHANNELS;REACTOME\_POTASSIUM

EM;REACTOME\_INTEGRATION\_OF\_ENERGY\_METABOLISM;REACTOME\_REGULATION\_OF\_IN

CH1\_TRANSMITS\_SIGNAL\_TO\_THE\_NUCLEUS;REACTOME\_SIGNALING\_BY\_NOTCH1;REACTO

\_AMINO\_ACIDS\_AND\_DERIVATIVES

METABOLISM;REACTOME\_SYNTHESIS\_OF\_PIPS\_AT\_THE\_PLASMA\_MEMBRANE;REACTOME\_I

E\_NOVO\_BIOSYNTHESIS;REACTOME\_PHOSPHOLIPID\_METABOLISM;REACTOME\_SPHINGOLI

INT;REACTOME\_CTNNB1\_PHOSPHORYLATION\_CASCADE;REACTOME\_CELL\_CYCLE;REACTO

LEVATED\_PLATELET\_CYTOSOLIC\_CA2\_;REACTOME\_GLYCOLYSIS;REACTOME\_GLUCONEOC



\_CAPPED\_INTRON\_CONTAINING\_PRE\_MRNA;REACTOME\_MRNA\_PROCESSING;REACTOME\_VAYS;REACTOME\_UNFOLDED\_PROTEIN\_RESPONSE  
CROSS\_CHEMICAL\_SYNAPSES;REACTOME\_NEURONAL\_SYSTEM;REACTOME\_NEUROTRAN

DATIONS;REACTOME\_CYTOSOLIC\_SULFONATION\_OF\_SMALL\_MOLECULES;REACTOME\_PHA

CROSS\_CHEMICAL\_SYNAPSES;REACTOME\_NEURONAL\_SYSTEM;REACTOME\_NEUROTRAN

CROSS\_CHEMICAL\_SYNAPSES;REACTOME\_NEURONAL\_SYSTEM;REACTOME\_SIGNALING\_E

PHA\_BETA\_SIGNALING;REACTOME\_INTERFERON\_SIGNALING;REACTOME\_IMMUNE\_SYSTEM

\_RESPIRATORY\_ELECTRON\_TRANSPORT;REACTOME\_RESPIRATORY\_ELECTRON\_TRANSP

HE\_PROTEOLYTIC\_ACTIVITY\_OF\_APC\_C\_REQUIRED\_FOR\_THE\_ONSET\_OF\_ANAPHASE\_BY\_

PCR;REACTOME\_OPIOID\_SIGNALLING;REACTOME\_DARPP\_32\_EVENTS

E\_TRANSPORT\_OF\_SMALL\_MOLECULES;REACTOME\_SLC\_MEDIATED\_TRANSMEMBRANE\_T

CF\_KIT;REACTOME\_GROWTH\_HORMONE\_RECEPTOR\_SIGNALING;REACTOME\_SIGNALING\_  
THESIS;REACTOME\_HEPARAN\_SULFATE\_HEPARIN\_HS\_GAG\_METABOLISM;REACTOME\_GLY

NGF;REACTOME\_TRIF\_MEDIATED\_TLR3\_SIGNALING;REACTOME\_TCR\_SIGNALING;REACTOM  
MUNICATION;REACTOME\_DSCAM\_INTERACTIONS

IOSYNTHESIS;REACTOME\_PHOSPHOLIPID\_METABOLISM;REACTOME\_SYNTHESIS\_OF\_PA;RI

PCR;REACTOME\_CLASS\_A1\_RHODOPSIN\_LIKE\_RECEPTORS;REACTOME\_GPCR\_DOWNSTR  
JATION;REACTOME\_CHONDROITIN\_SULFATE\_DERMATAN\_SULFATE\_METABOLISM;REACTO

MUNICATION;REACTOME\_CELL\_EXTRACELLULAR\_MATRIX\_INTERACTIONS;REACTOME\_CEL

HO\_GTPASES;REACTOME\_MEMBRANE\_TRAFFICKING;REACTOME\_TRANS\_GOLGI\_NETWORK

LEVATED\_PLATELET\_CYTOSOLIC\_CA2\_;REACTOME\_FORMATION\_OF\_FIBRIN\_CLOT\_CLOTT

LIPID\_METABOLISM;REACTOME\_PHOSPHOLIPID\_METABOLISM;REACTOME\_SPHINGOLIPID\_M  
NGF;REACTOME\_CELL\_CELL\_COMMUNICATION;REACTOME\_P75NTR\_RECRUITS\_SIGNALLIN

\_LIPIDS\_AND\_LIPOPOTEINS;REACTOME\_LIPID\_DIGESTION\_MOBILIZATION\_AND\_TRANSPOR

\_NSPORT\_ACROSS\_THE\_PLASMA\_MEMBRANE;REACTOME\_TRANSMEMBRANE\_TRANSPORT

\_OSYLATION\_OF\_MUCINS;REACTOME\_TERMINATION\_OF\_O\_GLYCAN\_BIOSYNTHESIS;REACTO

ME\_CELL\_CYCLE;REACTOME\_CHROMOSOME\_MAINTENANCE;REACTOME\_MEIOTIC\_SYNA  
NSCRIPTION\_AND\_TRANSLATION;REACTOME\_SIGNALING\_BY\_NOTCH2;REACTOME\_PRE\_N

\_COMPLEMENT\_CASCADE;REACTOME\_INNATE\_IMMUNE\_SYSTEM;REACTOME\_IMMUNE\_SY

SURFACE\_INTERACTIONS;REACTOME\_SIGNALING\_BY\_PDGF

PTERIN\_BH4\_SYNTHESIS\_RECYCLING\_SALVAGE\_AND\_REGULATION;REACTOME\_METABOL

CROSS\_CHEMICAL\_SYNAPSES;REACTOME\_NEURONAL\_SYSTEM;REACTOME\_NEUROTRAN

METABOLISM;REACTOME\_SYNTHESIS\_OF\_PC;REACTOME\_GLYCEROPHOSPHOLIPID\_BIOSYN  
S\_GENE\_EXPRESSION;REACTOME\_METABOLISM\_OF\_LIPIDS\_AND\_LIPOPROTEINS;REACTC  
SURFACE\_INTERACTIONS

NSCRIPTION\_INITIATION\_FROM\_TYPE\_2\_PROMOTER;REACTOME\_RNA\_POL\_II\_TRANSCRIP

TES\_B\_CELL\_RECEPTOR\_LEADING\_TO\_GENERATION\_OF\_SECOND\_MESSENGERS;REACTC

\_RESPIRATORY\_ELECTRON\_TRANSPORT;REACTOME\_MITOCHONDRIAL\_PROTEIN\_IMPORT;  
SIGNALLING\_PATHWAY\_VIA\_PKC\_AND\_MAPK;REACTOME\_SIGNALING\_BY\_GPCR;REACTOME

LCROSS\_CHEMICAL\_SYNAPSES;REACTOME\_NEURONAL\_SYSTEM

PROTEINS;REACTOME\_POST\_TRANSLATIONAL\_PROTEIN\_MODIFICATION;REACTOME\_SYN

PCR;REACTOME\_PEPTIDE\_LIGAND\_BINDING\_RECEPTORS;REACTOME\_CLASS\_A1\_RHODOP

DEGRADATION;REACTOME\_SIGNALLING\_BY\_NGF;REACTOME\_DEVELOPMENTAL\_BIOLOGY;F

G;REACTOME\_POST\_CHAPERONIN\_TUBULIN\_FOLDING\_PATHWAY;REACTOME\_METABOLIS

LCROSS\_CHEMICAL\_SYNAPSES;REACTOME\_NEURONAL\_SYSTEM;REACTOME\_NEUROTRAN

MUNICATION;REACTOME\_SIGNAL\_REGULATORY\_PROTEIN\_SIRP\_FAMILY\_INTERACTIONS

CELLULAR\_DOMAIN\_REGULATES\_TRANSCRIPTION;REACTOME\_SIGNALING\_BY\_NOTCH1;REA

E\_TRANSPORT\_OF\_SMALL\_MOLECULES;REACTOME\_SLC\_MEDIATED\_TRANSMEMBRANE\_T

.BIOLOGY;REACTOME\_HS\_GAG\_DEGRADATION;REACTOME\_CHONDROITIN\_SULFATE\_DER

HO\_GTPASES

.COUPLED\_NER\_TC\_NER;REACTOME\_NUCLEOTIDE\_EXCISION\_REPAIR;REACTOME\_FORMA

E\_TRANSPORT\_OF\_SMALL\_MOLECULES;REACTOME\_SLC\_MEDIATED\_TRANSMEMBRANE\_T

.BIOLOGY;REACTOME\_AXON\_GUIDANCE;REACTOME\_NETRIN1\_SIGNALING;REACTOME\_DC

SSING\_CROSS\_PRESENTATION;REACTOME\_ENDOSOMAL\_VACUOLAR\_PATHWAY;REACTOM

SPORT\_AND\_METABOLISM;REACTOME\_ABC\_FAMILY\_PROTEINS\_MEDIATED\_TRANSPORT;RI

SIGNALLING\_PATHWAY\_VIA\_PKC\_AND\_MAPK;REACTOME\_SIGNALING\_BY\_GPCR;REACTOME

SIGNALLING\_PATHWAY\_VIA\_PKC\_AND\_MAPK;REACTOME\_SIGNALING\_BY\_GPCR;REACTOME

PCR;REACTOME\_OLFACTORY\_SIGNALING\_PATHWAY;REACTOME\_GPCR\_DOWNSTREAM\_S

CROSS\_CHEMICAL\_SYNAPSES;REACTOME\_NEURONAL\_SYSTEM

CRIPION\_PATHWAY

PIPS\_AT\_THE\_EARLY\_ENDOSOME\_MEMBRANE;REACTOME\_SYNTHESIS\_OF\_PIPS\_AT\_THE\_C  
MUNICATION;REACTOME\_CELL\_EXTRACELLULAR\_MATRIX\_INTERACTIONS;REACTOME\_CEL  
ME\_CELL\_CYCLE;REACTOME\_P53\_INDEPENDENT\_G1\_S\_DNA\_DAMAGE\_CHECKPOINT;REAC  
WAYS;REACTOME\_ACTIVATION\_OF\_CHAPERONE\_GENES\_BY\_XBP1S;REACTOME\_UNFOLDE

NGF;REACTOME\_SIGNALING\_BY\_SCF\_KIT;REACTOME\_DEVELOPMENTAL\_BIOLOGY;REACTC  
NTIGEN\_PRESENTATION;REACTOME\_FACTORS\_INVOLVED\_IN\_MEGAKARYOCYTE\_DEVELOF  
EM;REACTOME\_INTEGRATION\_OF\_ENERGY\_METABOLISM;REACTOME\_REGULATION\_OF\_IN

CROSS\_CHEMICAL\_SYNAPSES;REACTOME\_NEURONAL\_SYSTEM;REACTOME\_NEUROTRAN

TES\_B\_CELL\_RECEPTOR\_LEADING\_TO\_GENERATION\_OF\_SECOND\_MESSENGERS;REACTC

/ED\_IN\_MEGAKARYOCYTE\_DEVELOPMENT\_AND\_PLATELET\_PRODUCTION;REACTOME\_HEM

CRPTION\_PATHWAY

CROSS\_CHEMICAL\_SYNAPSES;REACTOME\_NEURONAL\_SYSTEM;REACTOME\_NEUROTRAN



\_CARBOHYDRATES

\_CARBOHYDRATES

PCR;REACTOME\_CLASS\_C\_3\_METABOTROPIC\_Glutamate\_Pheromone\_Receptors;RE  
3;REACTOME\_IMMUNE\_SYSTEM;REACTOME\_ADAPTIVE\_IMMUNE\_SYSTEM

ORATION\_OF\_CARBOXYLIC\_ACID\_DERIVED\_AMINO\_ACIDS

SSING\_CROSS\_PRESENTATION;REACTOME\_LATENT\_INFECTION\_OF\_HOMO\_SAPIENS\_WITI  
EM;REACTOME\_VOLTAGE\_GATED\_POTASSIUM\_CHANNELS;REACTOME\_POTASSIUM\_CHAN

OSYLATION\_OF\_MUCINS;REACTOME\_METABOLISM\_OF\_PROTEINS;REACTOME\_POST\_TRAN

\_PROTEIN\_IMPORT;REACTOME\_METABOLISM\_OF\_PROTEINS

RBOXYLATION\_HYPUSINE\_FORMATION\_AND\_ARYLSULFATASE\_ACTIVATION;REACTOME\_GL  
PAS2\_ACTIVATES\_CIRCADIAN\_EXPRESSION;REACTOME\_CIRCADIAN\_CLOCK

CTOME\_CELL\_CYCLE\_MITOTIC;REACTOME\_MITOTIC\_M\_M\_G1\_PHASES;REACTOME\_DNA\_R

OSYLATION\_OF\_MUCINS;REACTOME\_METABOLISM\_OF\_PROTEINS;REACTOME\_POST\_TRAN

\_BIOLOGY;REACTOME\_AXON\_GUIDANCE;REACTOME\_NETRIN1\_SIGNALING;REACTOME\_DC

\_NON\_CODING\_RNA;REACTOME\_ANTIVIRAL\_MECHANISM\_BY\_IFN\_STIMULATED\_GENES;RE

OR\_RECYCLING;REACTOME\_LATENT\_INFECTION\_OF\_HOMO\_SAPIENS\_WITH\_MYCOBACTERI

NGF

\_SYSTEM;REACTOME\_IMMUNE\_SYSTEM;REACTOME\_NOD1\_2\_SIGNALING\_PATHWAY;REACT

MUNICATION;REACTOME\_TGF\_BETA\_RECEPTOR\_SIGNALING\_IN\_EMT\_EPITHELIAL\_TO\_MES

\_BIOLOGY;REACTOME\_AXON\_GUIDANCE;REACTOME\_NETRIN1\_SIGNALING;REACTOME\_DC

\_AMINO\_ACIDS\_AND\_DERIVATIVES;REACTOME\_AMINE\_DERIVED\_HORMONES

\_BIOLOGY;REACTOME\_EXTRACELLULAR\_MATRIX\_ORGANIZATION;REACTOME\_COLLAGEN\_

\_BIOLOGY;REACTOME\_PPARA\_ACTIVATES\_GENE\_EXPRESSION;REACTOME\_METABOLISM\_

\_BIOLOGY;REACTOME\_REGULATION\_OF\_BETA\_CELL\_DEVELOPMENT;REACTOME\_REGULA  
/ED\_IN\_MEGAKARYOCYTE\_DEVELOPMENT\_AND\_PLATELET\_PRODUCTION;REACTOME\_HEM  
\_NON\_CODING\_RNA;REACTOME\_METABOLISM\_OF\_RNA

WAGE\_OF\_CELLULAR\_PROTEINS;REACTOME\_MEMBRANE\_TRAFFICKING;REACTOME\_SIGN

CROSS\_CHEMICAL\_SYNAPSES;REACTOME\_NEURONAL\_SYSTEM;REACTOME\_NEUROTRAN

SURFACE\_INTERACTIONS

MUNICATION;REACTOME\_INTEGRIN\_CELL\_SURFACE\_INTERACTIONS;REACTOME\_CELL\_JUN  
OR\_SIGNALLING\_CASCADE;REACTOME\_REGULATION\_OF\_AMPK\_ACTIVITY\_VIA\_LKB1;REAC  
\_MATRIX\_ORGANIZATION;REACTOME\_COLLAGEN\_FORMATION;REACTOME\_METABOLISM\_C  
SYLATION\_OF\_MUCINS;REACTOME\_METABOLISM\_OF\_PROTEINS;REACTOME\_POST\_TRAN  
SYLATION\_OF\_MUCINS;REACTOME\_METABOLISM\_OF\_PROTEINS;REACTOME\_POST\_TRAN

CRPTION\_PATHWAY

CRPTION\_PATHWAY

IOSYNTHESIS;REACTOME\_PHOSPHOLIPID\_METABOLISM;REACTOME\_SYNTHESIS\_OF\_PE;RI

HO\_GTPASES;REACTOME\_SIGNALLING\_BY\_NGF;REACTOME\_NRAGE\_SIGNALS\_DEATH\_THF

ON\_OF\_TGF\_BETA\_RECEPTOR\_SIGNALING;REACTOME\_TGF\_BETA\_RECEPTOR\_SIGNALING\_  
\KDOWN\_GLYCOGENOLYSIS;REACTOME\_METABOLISM\_OF\_CARBOHYDRATES;REACTOME\_

MUNICATION;REACTOME\_CELL\_JUNCTION\_ORGANIZATION

CTOME\_CELL\_CYCLE\_MITOTIC;REACTOME\_RECRUITMENT\_OF\_MITOTIC\_CENTROSOME\_PI

\_SYSTEM;REACTOME\_IMMUNE\_SYSTEM;REACTOME\_INFLAMMASOMES;REACTOME\_NUCLEO

REACTOME\_TRANSLOCATION\_OF\_ZAP\_70\_TO\_IMMUNOLOGICAL\_SYNAPSE;REACTOME\_GE

ANTIGEN\_PRESENTATION;REACTOME\_FACTORS\_INVOLVED\_IN\_MEGAKARYOCYTE\_DEVELOP  
MENT;REACTOME\_CLASS\_B\_2\_SECRETIN\_FAMILY\_RECEPTORS;REACTOME\_GPCR\_DOWNST

REACTOME\_SRP\_DEPENDENT\_COTRANSLATIONAL\_PROTEIN\_TARGETING\_TO\_MEMBRANE;RE

ACTOME\_SIGNALING\_BY\_SCF\_KIT;REACTOME\_CELL\_CELL\_COMMUNICATION;REACT

OME\_TRANSPORT\_OF\_SMALL\_MOLECULES;REACTOME\_ION\_TRANSPORT\_BY\_P\_TYPE\_ATPASE  
TRANSPORT\_OF\_SMALL\_MOLECULES;REACTOME\_ION\_TRANSPORT\_BY\_P\_TYPE\_ATPASE

LATION\_OF\_FGFR\_SIGNALING;REACTOME\_INSULIN\_RECEPTOR\_SIGNALLING\_CASCADE;RE

ACTOME\_CLASS\_A1\_RHODOPHOSPHATASES;REACTOME\_SIGNALLING\_BY\_NGF;REACTOME\_PPARG\_ACTIVATES\_GENE\_EXPRESSION

REACTOME\_TERMINATION\_OF\_O\_GLYCAN\_BIOSYNTHESIS;REACTOME\_TERMINATION\_OF\_O\_GLYCAN\_BIOSYNTHESIS;REACTOME\_TERMINATION\_OF\_O\_GLYCAN\_BIOSYNTHESIS

ACTION;REACTOME\_SMOOTH\_MUSCLE\_CONTRACTION  
OF\_THE\_EXTRACELLULAR\_MATRIX;REACTOME\_EXTRACELLULAR\_MATRIX\_ORGANIZATION

ATIONS;REACTOME\_GLUTATHIONE\_CONJUGATION;REACTOME\_PHASE\_II\_CONJUGATION  
REACTOME\_HIV\_LIFE\_CYCLE;REACTOME\_EARLY\_PHASE\_OF\_HIV\_LIFE\_CYCLE;REACTOME\_I

CELL\_BIOLOGY;REACTOME\_CELL\_CELL\_COMMUNICATION;REACTOME\_IMMUNOREGULATORY\_I

OSYLATION\_OF\_MUCINS;REACTOME\_TERMINATION\_OF\_O\_GLYCAN\_BIOSYNTHESIS;REACTO  
M;REACTOME\_INTEGRATION\_OF\_ENERGY\_METABOLISM;REACTOME\_ABC\_FAMILY\_PROTEI  
BOLISM\_AND\_CITRIC\_ACID\_TCA\_CYCLE;REACTOME\_TCA\_CYCLE\_AND\_RESPIRATORY\_ELE

ANTIGEN\_PRESENTATION;REACTOME\_IMMUNE\_SYSTEM;REACTOME\_ADAPTIVE\_IMMUNE\_SY  
STEM;REACTOME\_TRANSPORT\_OF\_SMALL\_MOLECULES;REACTOME\_SLC\_MEDIATED\_TRANSMEMBRANE\_TI

OF\_THE\_EXTRACELLULAR\_MATRIX;REACTOME\_EXTRACELLULAR\_MATRIX\_ORGANIZATION  
OF\_MUSCLE\_CONTRACTION;REACTOME\_MUSCLE\_CONTRACTION

;REACTOME\_ADAPTIVE\_IMMUNE\_SYSTEM;REACTOME\_CLASS\_I\_MHC\_MEDIATED\_ANTIGEN

THE\_PROTEOLYTIC\_ACTIVITY\_OF\_APC\_C\_REQUIRED\_FOR\_THE\_ONSET\_OF\_ANAPHASE\_BY\_I



FICKING;REACTOME\_GAP\_JUNCTION\_TRAFFICKING;REACTOME\_GAP\_JUNCTION\_ASSEMBLY  
SYLATION\_OF\_MUCINS;REACTOME\_TERMINATION\_OF\_O\_GLYCAN\_BIOSYNTHESIS;REACTO

REACTOME\_ANTIVIRAL\_MECHANISM\_BY\_IFN\_STIMULATED\_GENES;REACTOME\_SIGNALING\_  
NUCLEOTIDES;REACTOME\_PURINE\_SALVAGE;REACTOME\_PURINE\_METABOLISM

HO\_GTPASES;REACTOME\_SIGNALLING\_BY\_NGF;REACTOME\_NRAGE\_SIGNALS\_DEATH\_THF  
\_AMINO\_ACIDS\_AND\_DERIVATIVES;REACTOME\_AMINE\_DERIVED\_HORMONES  
\_STEROID\_HORMONES\_AND\_VITAMINS\_A\_AND\_D;REACTOME\_STEROID\_HORMONES;REAC

\_MATRIX\_ORGANIZATION;REACTOME\_COLLAGEN\_FORMATION  
ETABOLISM;REACTOME\_GLYCOSAMINOGLYCAN\_METABOLISM;REACTOME\_ABC\_FAMILY\_PF  
REACTOME\_NITRIC\_OXIDE\_STIMULATES\_GUANYLATE\_CYCLASE;REACTOME\_PLATELET\_HC  
FICKING;REACTOME\_TRANS\_GOLGI\_NETWORK\_VESICLE\_BUDDING;REACTOME\_GOLGI\_AS

PCR;REACTOME\_PEPTIDE\_LIGAND\_BINDING\_RECEPTORS;REACTOME\_CLASS\_A1\_RHODOF

\_BIOLOGY;REACTOME\_AXON\_GUIDANCE;REACTOME\_OTHER\_SEMAPHORIN\_INTERACTION  
HO\_GTPASES;REACTOME\_SIGNALLING\_BY\_NGF;REACTOME\_TRANSMISSION\_ACROSS\_CHE  
AVAGE\_OF\_CELLULAR\_PROTEINS;REACTOME\_SIGNALING\_BY\_WNT;REACTOME\_CTNNB1\_P

\_BIOLOGY;REACTOME\_TRANSCRIPTIONAL\_REGULATION\_OF\_WHITE\_ADIPOCYTE\_DIFFERE  
IPPO

THE\_PRE\_REPLICATIVE\_COMPLEX;REACTOME\_CELL\_CYCLE;REACTOME\_PROCESSIVE\_SYI

\_BIOLOGY;REACTOME\_AXON\_GUIDANCE;REACTOME\_CRMP5\_IN\_SEMA3A\_SIGNALING;REA

NSCRIPTION;REACTOME\_TRANSCRIPTION;REACTOME\_RNA\_POL\_I\_RNA\_POL\_III\_AND\_MITC

PCR;REACTOME\_OLFACTORY\_SIGNALING\_PATHWAY;REACTOME\_GPCR\_DOWNSTREAM\_S

:S\_GENE\_EXPRESSION;REACTOME\_METABOLISM\_OF\_LIPIDS\_AND\_LIPOPROTEINS;REACTC  
  
DASYLATION\_OF\_MUCINS;REACTOME\_METABOLISM\_OF\_PROTEINS;REACTOME\_POST\_TRAN  
  
NGF;REACTOME\_DAG\_AND\_IP3\_SIGNALING;REACTOME\_SIGNALING\_BY\_ERBB2;REACTOME  
  
:\_ENERGY\_METABOLISM;REACTOME\_REGULATION\_OF\_INSULIN\_SECRETION;REACTOME\_II  
  
\_MRNA;REACTOME\_METABOLISM\_OF\_RNA;REACTOME\_DESTABILIZATION\_OF\_MRNA\_BY\_B  
\_BIOLOGY;REACTOME\_AXON\_GUIDANCE;REACTOME\_NCAM1\_INTERACTIONS;REACTOME\_  
  
\_MATRIX\_ORGANIZATION;REACTOME\_COLLAGEN\_FORMATION  
  
\_HYPOXIA\_INDUCIBLE\_FACTOR\_HIF\_BY\_OXYGEN;REACTOME\_OXYGEN\_DEPENDENT\_PROL  
  
ACTOME\_FORMATION\_OF\_THE\_TERNARY\_COMPLEX\_AND\_SUBSEQUENTLY\_THE\_43S\_COM  
  
LEVATED\_PLATELET\_CYTOSOLIC\_CA2\_;REACTOME\_FORMATION\_OF\_FIBRIN\_CLOT\_CLOTT



OPENING;REACTOME\_TRANSCRIPTION;REACTOME\_RNA\_POL\_II\_PRE\_TRANSCRIPTION\_EV  
\_MRNA\_SPLICING

\_PHASE1\_FUNCTIONALIZATION\_OF\_COMPOUNDS  
3LYCEROPHOSPHOLIPID\_BIOSYNTHESIS;REACTOME\_METABOLISM\_OF\_LIPIDS\_AND\_LIPOPI

.IMMUNE\_SYSTEM;REACTOME\_ADAPTIVE\_IMMUNE\_SYSTEM  
)CHONDRIAL\_TRANSCRIPTION;REACTOME\_RNA\_POL\_III\_TRANSCRIPTION\_INITIATION\_FROI

DLING\_IN\_IMMUNE\_SYSTEM

ARGININE\_N\_LINKED\_GLYCOSYLATION;REACTOME\_TRANSPORT\_TO\_THE\_GOLGI\_AND\_SUE

REAM\_SIGNALING;REACTOME\_G\_ALPHA\_S\_SIGNALLING\_EVENTS;REACTOME\_GPCR\_LIGA

E\_EXPRESSION;REACTOME\_PRE\_NOTCH\_EXPRESSION\_AND\_PROCESSING;REACTOME\_NC

ACTOME\_PROCESSING\_OF\_CAPPED\_INTRON\_CONTAINING\_PRE\_MRNA;REACTOME\_TRAN

\_SIGNALING\_BY\_EGFR\_IN\_CANCER;REACTOME\_NGF\_SIGNALLING\_VIA\_TRKA\_FROM\_THE\_I  
;REACTOME\_SPRY\_REGULATION\_OF\_FGF\_SIGNALING;REACTOME\_TRIF\_MEDIATED\_TLR3\_

RANSPORT;REACTOME\_TRANSPORT\_OF\_GLUCOSE\_AND\_OTHER\_SUGARS\_BILE\_SALTS\_AI

MPLEX;REACTOME\_ACTIVATION\_OF\_THE\_MRNA\_UPON\_BINDING\_OF\_THE\_CAP\_BINDING\_C

SIS;REACTOME\_PACKAGING\_OF\_TELOMERE\_ENDS;REACTOME\_TELOMERE\_MAINTENANCE

LIFE\_CYCLE;REACTOME\_LATE\_PHASE\_OF\_HIV\_LIFE\_CYCLE

N\_FORMATION;REACTOME\_CELL\_JUNCTION\_ORGANIZATION

ME\_DOWNSTREAM\_TCR\_SIGNALING;REACTOME\_P75NTR\_RECRUITS\_SIGNALLING\_COMPLE

IGNALING

\_TRANSPORT\_ACROSS\_THE\_PLASMA\_MEMBRANE;REACTOME\_TRANSMEMBRANE\_TRANSF

3OLISM;REACTOME\_GLYCOSAMINOGLYCAN\_METABOLISM;REACTOME\_METABOLISM\_OF\_C

SIS

ES;REACTOME\_ION\_CHANNEL\_TRANSPORT

:EVENTS

\_MRNA\_SPLICING;REACTOME\_MRNA\_SPLICING\_MINOR\_PATHWAY

ROTEINS\_AND\_COMPLEXES;REACTOME\_LOSS\_OF\_NLP\_FROM\_MITOTIC\_CENTROSOMES;R

\_SIGNALING\_BY\_EGFR\_IN\_CANCER;REACTOME\_NGF\_SIGNALLING\_VIA\_TRKA\_FROM\_THE\_I

STRATE\_TYPE;REACTOME\_PHASE1\_FUNCTIONALIZATION\_OF\_COMPOUNDS

D\_PROTEIN\_RESPONSE

\_PRE\_MRNA;REACTOME\_RNA\_POL\_II\_TRANSCRIPTION;REACTOME\_MRNA\_PROCESSING;RE

'COSAMINOGLYCAN\_METABOLISM;REACTOME\_METABOLISM\_OF\_CARBOHYDRATES  
ROUGH\_JNK;REACTOME\_CELL\_DEATH\_SIGNALLING\_VIA\_NRAGE\_NRIF\_AND\_NADE;REACTO

SIGNALING\_BY\_ERBB2;REACTOME\_SIGNALING\_BY\_EGFR\_IN\_CANCER;REACTOME\_PI3K\_EVI  
SIGNALING\_BY\_ERBB2;REACTOME\_SIGNALING\_BY\_EGFR\_IN\_CANCER;REACTOME\_PI3K\_EVI

\_FROM\_CHROMATIN;REACTOME\_ASSOCIATION\_OF\_LICENSING\_FACTORS\_WITH\_THE\_PRE\_

INELS





HOMEOSTASIS;REACTOME\_HIV\_INFECTION;REACTOME\_HOST\_INTERACTIONS\_OF\_HIV\_FACTOR  
VIRUS;REACTOME\_NOTCH1\_INTRACELLULAR\_DOMAIN\_REGULATES\_TRANSCRIPTION;REACTO

ION\_CHANNEL

GLYCOGEN;REACTOME\_METABOLISM\_OF\_CARBOHYDRATES

TRANSPORT;REACTOME\_TRANSPORT\_OF\_INORGANIC\_CATIONS\_ANIONS\_AND\_AMINO\_ACID

REACTOME\_ENDOSOMAL\_SORTING\_COMPLEX\_REQUIRED\_FOR\_TRANSPORT\_ESCRT;REACTOME

TRANSPORT;REACTOME\_TRANSPORT\_OF\_INORGANIC\_CATIONS\_ANIONS\_AND\_AMINO\_ACID

E\_PLASMA\_MEMBRANE;REACTOME\_SIGNALLING\_TO\_ERKS;REACTOME\_P38MAPK\_EVENTS  
SPORT;REACTOME\_STEROID\_HORMONES;REACTOME\_METABOLISM\_OF\_LIPIDS\_AND\_LIPC

REACTOME\_REGULATION\_OF\_WATER\_BALANCE\_BY\_RENAL\_AQUAPORINS

OME\_METABOLISM\_OF\_PROTEINS;REACTOME\_POST\_TRANSLATIONAL\_PROTEIN\_MODIFIC/  
OME\_METABOLISM\_OF\_PROTEINS;REACTOME\_POST\_TRANSLATIONAL\_PROTEIN\_MODIFIC/

'COSAMINOGLYCAN\_METABOLISM;REACTOME\_METABOLISM\_OF\_CARBOHYDRATES

CA2\_;REACTOME\_HEMOSTASIS;REACTOME\_PLATELET\_ACTIVATION\_SIGNALING\_AND\_AGG  
D\_PROTEIN\_RESPONSE  
PMENT\_AND\_PLATELET\_PRODUCTION;REACTOME\_KINESINS;REACTOME\_HEMOSTASIS;RE/

IGNALING

DE\_STIMULATES\_GUANYLATE\_CYCLASE;REACTOME\_PLATELET\_HOMEOSTASIS;REACTOME  
REACTOME\_SIGNALING\_BY\_NOTCH1;REACTOME\_TRANSCRIPTIONAL\_ACTIVITY\_OF\_SMAD2  
IPTOSIS\_INDUCED\_DNA\_FRAGMENTATION;REACTOME\_TAK1\_ACTIVATES\_NFKB\_BY\_PHOSF

\_PROCESSING\_PRESENTATION;REACTOME\_ANTIGEN\_PROCESSING\_UBIQUITINATION\_PRC

IGNALING

RANSPORT;REACTOME\_TRANSPORT\_OF\_INORGANIC\_CATIONS\_ANIONS\_AND\_AMINO\_ACID

SIGNALING

RANSPORT;REACTOME\_TRANSPORT\_OF\_VITAMINS\_NUCLEOSIDES\_AND\_RELATED\_MOLEC

I;REACTOME\_CYTOKINE\_SIGNALING\_IN\_IMMUNE\_SYSTEM  
TION\_INTERACTIONS;REACTOME\_CELL\_JUNCTION\_ORGANIZATION

M\_OF\_PROTEINS

IAPSES;REACTOME\_NEURONAL\_SYSTEM;REACTOME\_NEUROTRANSMITTER\_RELEASE\_CYC

'SIN\_LIKE\_RECEPTORS;REACTOME\_GPCR\_DOWNSTREAM\_SIGNALING;REACTOME\_G\_ALPH

DL\_OXIDATION

DL\_OXIDATION

ANSCRIPTION\_PATHWAY;REACTOME\_METABOLISM\_OF\_LIPIDS\_AND\_LIPOPROTEINS;REACT

K\_VESICLE\_BUDDING;REACTOME\_SYNTHESIS\_OF\_PIPS\_AT\_THE\_GOLGI\_MEMBRANE;REAC

\_PROCESSING\_PRESENTATION;REACTOME\_ANTIGEN\_PROCESSING\_UBIQUITINATION\_PRC

IGNALING

;REACTOME\_PURINE\_METABOLISM

ESINS;REACTOME\_HEMOSTASIS

ESINS;REACTOME\_HEMOSTASIS

ACTOME\_GLYCEROPHOSPHOLIPID\_BIOSYNTHESIS;REACTOME\_SIGNALING\_BY\_GPCR;REAC

TOME\_SIGNALING\_BY\_ERBB4;REACTOME\_SIGNALING\_BY\_ERBB2;REACTOME\_SIGNALING\_E

TOME\_SIGNALING\_BY\_ERBB4;REACTOME\_SIGNALING\_BY\_ERBB2;REACTOME\_SIGNALING\_E

PEPTIDE\_LIGAND\_BINDING\_RECEPTORS;REACTOME\_CLASS\_A1\_RHODOPSIN\_LIKE\_RECE

ER\_PHAGOSOME\_PATHWAY;REACTOME\_IMMUNOREGULATORY\_INTERACTIONS\_BETWE  
CHONDRIAL\_TRANSCRIPTION;REACTOME\_RNA\_POL\_I\_TRANSCRIPTION\_INITIATION

FATTY\_ACID\_TRIACYLGLYCEROL\_AND\_KETONE\_BODY\_METABOLISM

CTION\_OF\_GENE\_EXPRESSION\_IN\_BETA\_CELLS;REACTOME\_TRANSMEMBRANE\_TRANSPOF

BY\_GPCR;REACTOME\_INTEGRATION\_OF\_ENERGY\_METABOLISM;REACTOME\_OPIOID\_SIGNA  
CTRON\_TRANSPORT;REACTOME\_REGULATION\_OF\_PYRUVATE\_DEHYDROGENASE\_PDH\_C

STASIS

RANSPORT;REACTOME\_TRANSPORT\_OF\_INORGANIC\_CATIONS\_ANIONS\_AND\_AMINO\_ACID  
CAM\_INTERACTIONS;REACTOME\_INTERACTION\_BETWEEN\_L1\_AND\_ANKYRINS;REACTOME

RANSPORT;REACTOME\_TRANSPORT\_OF\_VITAMINS\_NUCLEOSIDES\_AND\_RELATED\_MOLEC

.ONAL\_SYSTEM;REACTOME\_INTEGRATION\_OF\_ENERGY\_METABOLISM;REACTOME\_AXON\_C

SMOOTH\_MUSCLE\_CONTRACTION;REACTOME\_HEMOSTASIS;REACTOME\_PLATELET\_ACTIV

REACTOME\_REGULATION\_OF\_WATER\_BALANCE\_BY\_RENAL\_AQUAPORINS

ME\_SIGNALING\_BY\_ERBB4;REACTOME\_SIGNALING\_BY\_ERBB2;REACTOME\_SIGNALING\_BY  
\_SIGNALING\_BY\_EGFR\_IN\_CANCER;REACTOME\_ANTIGEN\_ACTIVATES\_B\_CELL\_RECEPTOR  
D\_PROTEIN\_RESPONSE

SSOCIATED\_VESICLE\_BIOGENESIS



SMITTER\_RECEPTOR\_BINDING\_AND\_DOWNSTREAM\_TRANSMISSION\_IN\_THE\_POSTSYNAP

CTRON\_TRANSPORT;REACTOME\_REGULATION\_OF\_PYRUVATE\_DEHYDROGENASE\_PDH\_C

REACTOME\_INTEGRATION\_OF\_ENERGY\_METABOLISM;REACTOME\_GLUCAGON\_SIGNALING\_IN\_METABOLISM;  
REACTOME\_TRIGLYCERIDE\_BIOSYNTHESIS;REACTOME\_FATTY\_ACYL\_COA\_BIOSYNTHESIS;REACTOME

REACTOME\_GROWTH\_FACTOR\_SIGNALING\_BY\_ATF4;REACTOME\_UNFOLDED\_PROTEIN\_RESPONSE;REACTOME\_METABOLISM\_OF  
REACTOME\_TRANSCRIPTION\_COUPLED\_NER\_TC\_NER\_REPAIR\_COMPLEX;REACTOME\_DNA\_REPAIR

REACTOME\_CELL\_GROWTH;REACTOME\_L1CAM\_INTERACTIONS;REACTOME\_INTERACTION\_BETWEEN\_L1CAM  
REACTOME\_GROWTH\_FACTOR\_SIGNALING\_BY\_ATF4;REACTOME\_UNFOLDED\_PROTEIN\_RESPONSE;REACTOME\_METABOLISM\_OF

REACTOME\_LIPID\_METABOLISM;REACTOME\_ACYL\_CHAIN\_REMODELLING\_OF\_PE;REACTOME\_GLYCEROL  
REACTOME\_PEPTIDE\_HORMONE\_BIOSYNTHESIS

REACTOME\_SIGNALING\_BY\_EGFR\_IN\_CANCER;REACTOME\_NGF\_SIGNALLING\_VIA\_TRKA\_FROM\_THE\_PLACENTA

REACTOME\_FROM\_CHROMATIN;REACTOME\_CELL\_CYCLE\_MITOTIC;REACTOME\_CELL\_CYCLE\_CHECKPOINTS

REACTOME\_IMMUNE\_SYSTEM;REACTOME\_ADAPTIVE\_IMMUNE\_SYSTEM

SLATIONAL\_PROTEIN\_MODIFICATION

ROUGH\_JNK;REACTOME\_CELL\_DEATH\_SIGNALLING\_VIA\_NRAGE\_NRIF\_AND\_NADE;REACTO

\_PROCESSING\_PRESENTATION;REACTOME\_ANTIGEN\_PROCESSING\_UBIQUITINATION\_PRC

TION\_INTERACTIONS;REACTOME\_CELL\_JUNCTION\_ORGANIZATION

MOLECULES

:SSING\_CROSS\_PRESENTATION;REACTOME\_INTERFERON\_GAMMA\_SIGNALING;REACTOME

ROUGH\_JNK;REACTOME\_CELL\_DEATH\_SIGNALLING\_VIA\_NRAGE\_NRIF\_AND\_NADE;REACTO

ROUGH\_JNK;REACTOME\_CELL\_DEATH\_SIGNALLING\_VIA\_NRAGE\_NRIF\_AND\_NADE;REACTO

SCRIPTION;REACTOME\_RNA\_POL\_I\_RNA\_POL\_III\_AND\_MITOCHONDRIAL\_TRANSCRIPTION;REA

OF\_SMALL\_MOLECULES;REACTOME\_SLC\_MEDIATED\_TRANSMEMBRANE\_TRANSPORT;RE.  
OF\_SMALL\_MOLECULES;REACTOME\_SLC\_MEDIATED\_TRANSMEMBRANE\_TRANSPORT;RE.

RANSPORT;REACTOME\_TRANSPORT\_OF\_INORGANIC\_CATIONS\_ANIONS\_AND\_AMINO\_ACID

SCRIPTION;REACTOME\_RNA\_POL\_I\_RNA\_POL\_III\_AND\_MITOCHONDRIAL\_TRANSCRIPTION;REA

TION;REACTOME\_TRANSCRIPTION;REACTOME\_RNA\_POL\_I\_RNA\_POL\_III\_AND\_MITOCHOND

CTOME\_SIGNALING\_BY\_NOTCH

HOSTASIS;REACTOME\_INNATE\_IMMUNE\_SYSTEM;REACTOME\_IMMUNE\_SYSTEM;REACTOME

BINDING

I\_REPLACEMENT\_PATHWAY;REACTOME\_BASE\_FREE\_SUGAR\_PHOSPHATE\_REMOVAL\_VIA\_I  
I\_REPLACEMENT\_PATHWAY;REACTOME\_BASE\_FREE\_SUGAR\_PHOSPHATE\_REMOVAL\_VIA

ES;REACTOME\_ION\_CHANNEL\_TRANSPORT

THE\_FANCONI\_ANEMIA\_PATHWAY;REACTOME\_FANCONI\_ANEMIA\_PATHWAY;REACTOME\_DI  
;REACTOME\_NUCLEOTIDE\_LIKE\_PURINERGIC\_RECEPTORS;REACTOME\_GPCR\_DOWNSTRE

CTION\_OF\_GENE\_EXPRESSION\_IN\_BETA\_CELLS;REACTOME\_INTEGRATION\_OF\_ENERGY\_M

SCRIPTION\_COUPLED\_NER\_TC\_NER;REACTOME\_POL\_SWITCHING;REACTOME\_NUCLEOTII

RANSPORT;REACTOME\_TRANSPORT\_OF\_INORGANIC\_CATIONS\_ANIONS\_AND\_AMINO\_ACID  
;TOME\_PPARA\_ACTIVATES\_GENE\_EXPRESSION;REACTOME\_RORA\_ACTIVATES\_CIRCADIAN

IOSTASIS

:ECEPTOR\_SIGNALING;REACTOME\_NUCLEAR\_SIGNALING\_BY\_ERBB4;REACTOME\_IMMUNE\_

\_II\_TRANSCRIPTION;REACTOME\_MRNA\_CAPPING;REACTOME\_TRANSCRIPTION\_COUPLED\_

ATION;REACTOME\_HYALURONAN\_UPTAKE\_AND\_DEGRADATION;REACTOME\_HYALURONAN  
ATION;REACTOME\_HYALURONAN\_UPTAKE\_AND\_DEGRADATION;REACTOME\_HYALURONAN  
ALPHA\_HYDROXYCHOLESTEROL;REACTOME\_SYNTHESIS\_OF\_BILE\_ACIDS\_AND\_BILE\_SALT

ME\_LIGAND\_GATED\_ION\_CHANNEL\_TRANSPORT

:NTIATION

EACTOME\_RNA\_POL\_I\_RNA\_POL\_III\_AND\_MITOCHONDRIAL\_TRANSCRIPTION;REACTOME\_C

ONAL\_REGULATION\_OF\_WHITE\_ADIPOCYTE\_DIFFERENTIATION;REACTOME\_APOPTOSIS

EACTOME\_CYTOCHROME\_P450\_ARRANGED\_BY\_SUBSTRATE\_TYPE;REACTOME\_PHASE1\_F

ITEM

RELATIONAL\_PROTEIN\_MODIFICATION

TYROSINE\_SIGNALING\_BY\_THE\_B\_CELL\_RECEPTOR\_BCR;REACTOME\_IMMUNE\_SYSTEM;REACTOME

REACTOME\_PI3K\_EVENT;  
REACTOME\_ERBB2\_SIGNALING\_BY\_ERBB2;REACTOME\_GRB2\_EVENTS\_IN\_ERBB2\_SIGNALING;REACTOME\_PI3K\_EVENT;

REACTOME\_RECRUITING\_RECEPTORS\_BY\_RECRUITING\_THEM\_TO\_CLATHRIN\_ADAPTERS;REACTOME\_LATENT\_INFECTIOUS\_AGENT;  
REACTOME\_PACKAGING\_OF\_TELOMERE\_ENDS;REACTOME\_TELOMERE\_MAINTENANCE;  
REACTOME\_SIGNALING\_BY\_NOTCH

IT\_AND\_PLATELET\_PRODUCTION;REACTOME\_TRAF3\_DEPENDENT\_IRF\_ACTIVATION\_PATH

CTOME\_SIGNALING\_BY\_NOTCH

N\_EVENTS;REACTOME\_NGF\_SIGNALLING\_VIA\_TRKA\_FROM\_THE\_PLASMA\_MEMBRANE;REA

HANCED\_BY\_THE\_EXON\_JUNCTION\_COMPLEX

TOME\_ROLE\_OF\_DCC\_IN\_REGULATING\_APOPTOSIS;REACTOME\_NETRIN1\_SIGNALING;REA  
TOME\_ROLE\_OF\_DCC\_IN\_REGULATING\_APOPTOSIS;REACTOME\_NETRIN1\_SIGNALING;REA

MENT\_AND\_PLATELET\_PRODUCTION;REACTOME\_KINESINS;REACTOME\_HEMOSTASIS;REA

OME\_METABOLISM\_OF\_PROTEINS;REACTOME\_POST\_TRANSLATIONAL\_PROTEIN\_MODIFIC

CA2\_;REACTOME\_HEMOSTASIS;REACTOME\_PLATELET\_ACTIVATION\_SIGNALING\_AND\_AGG



NCAM\_SIGNALING\_FOR\_NEURITE\_OUT\_GROWTH;REACTOME\_L1CAM\_INTERACTIONS;REAC

\_GLUCOSE\_METABOLISM  
\_GLUCOSE\_METABOLISM  
SOCIATED\_VESICLE\_BIOGENESIS  
D\_PROTEIN\_RESPONSE

REACTOME\_CYTOCHROME\_P450\_ARRANGED\_BY\_SUBSTRATE\_TYPE;REACTOME\_PHASE1\_F  
REACTOME\_CYTOCHROME\_P450\_ARRANGED\_BY\_SUBSTRATE\_TYPE;REACTOME\_PHASE1\_F

\_OF\_LIPIDS\_AND\_LIPOPROTEINS;REACTOME\_FATTY\_ACID\_TRIACYLGLYCEROL\_AND\_KETO  
LIPID\_METABOLISM;REACTOME\_SYNTHESIS\_OF\_PA;REACTOME\_ACYL\_CHAIN\_REMODELLIN

OSTASIS

TIVATION\_AND\_REGULATION

\_S\_TRANSITION\_;REACTOME\_G1\_S\_TRANSITION;REACTOME\_MITOTIC\_G1\_G1\_S\_PHASES;R  
\_S\_TRANSITION\_;REACTOME\_G1\_S\_TRANSITION;REACTOME\_MITOTIC\_G1\_G1\_S\_PHASES;R

SING\_OF\_ENDOSOMAL\_TLR;REACTOME\_MHC\_CLASS\_II\_ANTIGEN\_PRESENTATION;REACTO

\_PROCESSING\_PRESENTATION;REACTOME\_ANTIGEN\_PROCESSING\_UBIQUITINATION\_PRC

UT\_GROWTH;REACTOME\_L1CAM\_INTERACTIONS;REACTOME\_INTERACTION\_BETWEEN\_L1

MPLEX;REACTOME\_ACTIVATION\_OF\_THE\_MRNA\_UPON\_BINDING\_OF\_THE\_CAP\_BINDING\_C

OME\_TRIF\_MEDIATED\_TLR3\_SIGNALING;REACTOME\_SIGNALING\_BY\_ERBB4;REACTOME\_SIG

SMITTER\_RECEPTOR\_BINDING\_AND\_DOWNSTREAM\_TRANSMISSION\_IN\_THE\_POSTSYNAP

G;REACTOME\_NGF\_SIGNALLING\_VIA\_TRKA\_FROM\_THE\_PLASMA\_MEMBRANE;REACTOME\_

HANCED\_BY\_THE\_EXON\_JUNCTION\_COMPLEX

BY\_INSULIN\_RECEPTOR;REACTOME\_MTORC1\_MEDIATED\_SIGNALLING;REACTOME\_PI3K\_C/

TION;REACTOME\_TRANSCRIPTION;REACTOME\_RNA\_POL\_I\_RNA\_POL\_III\_AND\_MITOCHONC

CTIONS;REACTOME\_HEMOSTASIS

.DING;REACTOME\_METABOLISM\_OF\_PROTEINS

LCIUM\_HOMEOSTASIS;REACTOME\_HEMOSTASIS

ACTES\_CIRCADIAN\_EXPRESSION;REACTOME\_METABOLISM\_OF\_LIPIDS\_AND\_LIPOPOTEINS;

F\_ENERGY\_METABOLISM;REACTOME\_METABOLISM\_OF\_LIPIDS\_AND\_LIPOPOTEINS;REAC

;TOME\_PPORA\_ACTIVATES\_GENE\_EXPRESSION;REACTOME\_RORA\_ACTIVATES\_CIRCADIAN

RANSPORT;REACTOME\_TRANSPORT\_OF\_INORGANIC\_CATIONS\_ANIONS\_AND\_AMINO\_ACID

NCAM\_SIGNALING\_FOR\_NEURITE\_OUT\_GROWTH

ANSCRIPTION;REACTOME\_HIV\_INFECTION;REACTOME\_HIV\_LIFE\_CYCLE;REACTOME\_LATE\_

ES;REACTOME\_ION\_CHANNEL\_TRANSPORT

\_OF\_LIPIDS\_AND\_LIPOPROTEINS;REACTOME\_FATTY\_ACID\_TRIACYLGLYCEROL\_AND\_KETOI

OME\_METABOLISM\_OF\_PROTEINS;REACTOME\_POST\_TRANSLATIONAL\_PROTEIN\_MODIFIC/  
OME\_METABOLISM\_OF\_PROTEINS;REACTOME\_POST\_TRANSLATIONAL\_PROTEIN\_MODIFIC/  
OME\_METABOLISM\_OF\_PROTEINS;REACTOME\_POST\_TRANSLATIONAL\_PROTEIN\_MODIFIC/  
OME\_METABOLISM\_OF\_PROTEINS;REACTOME\_POST\_TRANSLATIONAL\_PROTEIN\_MODIFIC/

TIVITY\_OF\_SMAD2\_SMAD3\_SMAD4\_HETEROTRIMER;REACTOME\_GENERIC\_TRANSCRIPTION

TRANSMEMBRANE\_TRANSPORT\_OF\_SMALL\_MOLECULES;REACTOME\_SLC\_MEDIATED\_TRA

'\_GPCR;REACTOME\_G\_ALPHA1213\_SIGNALLING\_EVENTS;REACTOME\_GPCR\_DOWNSTREAM  
SMITTER\_RECEPTOR\_BINDING\_AND\_DOWNSTREAM\_TRANSMISSION\_IN\_THE\_POSTSYNAP  
SMITTER\_RECEPTOR\_BINDING\_AND\_DOWNSTREAM\_TRANSMISSION\_IN\_THE\_POSTSYNAP

HOURED\_PROTEINS;REACTOME\_POST\_TRANSLATIONAL\_PROTEIN\_MODIFICATION;REACTOV  
HOURED\_PROTEINS;REACTOME\_POST\_TRANSLATIONAL\_PROTEIN\_MODIFICATION;REACTOV

CAL\_SYNAPSES;REACTOME\_NEURONAL\_SYSTEM;REACTOME\_SIGNALING\_BY\_GPCR;REAC

IGNALING;REACTOME\_HIV\_INFECTION;REACTOME\_HOST\_INTERACTIONS\_OF\_HIV\_FACTORS  
:TOME\_PPARA\_ACTIVATES\_GENE\_EXPRESSION;REACTOME\_RORA\_ACTIVATES\_CIRCADIAN  
:TOME\_PPARA\_ACTIVATES\_GENE\_EXPRESSION;REACTOME\_RORA\_ACTIVATES\_CIRCADIAN

E\_SIGNALING\_BY\_NOTCH

:TOME\_PPARA\_ACTIVATES\_GENE\_EXPRESSION;REACTOME\_PRE\_NOTCH\_TRANSCRIPTION  
ME\_FATTY\_ACID\_TRIACYLGLYCEROL\_AND\_KETONE\_BODY\_METABOLISM  
SIS

<B\_AND\_MAP\_KINASES\_UPON\_TLR7\_8\_OR\_9\_ACTIVATION;REACTOME\_TRAF6\_MEDIATED\_I  
<B\_AND\_MAP\_KINASES\_UPON\_TLR7\_8\_OR\_9\_ACTIVATION;REACTOME\_TRAF6\_MEDIATED\_I  
NAL\_SYSTEM;REACTOME\_PHASE1\_FUNCTIONALIZATION\_OF\_COMPOUNDS;REACTOME\_NE

DRT;REACTOME\_RESPIRATORY\_ELECTRON\_TRANSPORT\_ATP\_SYNTHESIS\_BY\_CHEMIOSM  
\NSCRIPTION\_PATHWAY;REACTOME\_METABOLISM\_OF\_LIPIDS\_AND\_LIPOPROTEINS;REACT

I;REACTOME\_NRAGE\_SIGNALS\_DEATH\_THROUGH\_JNK;REACTOME\_CELL\_DEATH\_SIGNALL  
ITION\_PHASE

I;REACTOME\_CYTOKINE\_SIGNALING\_IN\_IMMUNE\_SYSTEM

NER\_MOLECULES;REACTOME\_AXON\_GUIDANCE;REACTOME\_SIGNALING\_BY\_ROBO\_RECEP

\_MITOTIC\_SPINDLE\_CHECKPOINT\_COMPONENTS;REACTOME\_CELL\_CYCLE;REACTOME\_CE

INS;REACTOME\_METABOLISM\_OF\_CARBOHYDRATES;REACTOME\_GLUCOSE\_METABOLISM  
\_PROCESSING\_PRESENTATION;REACTOME\_ANTIGEN\_PROCESSING\_UBIQUITINATION\_PRC

E\_PEPTIDE\_LIGAND\_BINDING\_RECEPTORS;REACTOME\_CLASS\_A1\_RHODOPSIN\_LIKE\_RECE  
RANSPORT;REACTOME\_TRANSPORT\_OF\_GLUCOSE\_AND\_OTHER\_SUGARS\_BILE\_SALTS\_AI  
RANSPORT;REACTOME\_TRANSPORT\_OF\_GLUCOSE\_AND\_OTHER\_SUGARS\_BILE\_SALTS\_AI

GNALING\_BY\_ROBO\_RECEPTOR;REACTOME\_NETRIN1\_SIGNALING

\_OF\_SMALL\_MOLECULES;REACTOME\_SLC\_MEDIATED\_TRANSMEMBRANE\_TRANSPORT;RE.

SIS

ME\_SIGNALING\_BY\_NOTCH

SIGNALING\_BY\_ERBB2;REACTOME\_SIGNALING\_BY\_EGFR\_IN\_CANCER;REACTOME\_PI3K\_EV

NG\_BY\_ERBB2;REACTOME\_PI3K\_EVENTS\_IN\_ERBB2\_SIGNALING  
[\_REPLACEMENT\_PATHWAY;REACTOME\_BASE\_FREE\_SUGAR\_PHOSPHATE\_REMOVAL\_VIA\_



Ξ\_G\_ALPHA\_Q\_SIGNALLING\_EVENTS;REACTOME\_GPCR\_DOWNSTREAM\_SIGNALING;REACT

ALPHA\_HYDROXYCHOLESTEROL;REACTOME\_SYNTHESIS\_OF\_BILE\_ACIDS\_AND\_BILE\_SALT

ROTEINS\_AND\_COMPLEXES;REACTOME\_LOSS\_OF\_NLP\_FROM\_MITOTIC\_CENTROSOMES;R

IMMUNE\_SYSTEM;REACTOME\_ADAPTIVE\_IMMUNE\_SYSTEM

REACTOME\_PPARA\_ACTIVATES\_GENE\_EXPRESSION;REACTOME\_RORA\_ACTIVATES\_CIRCADIAN

REACTOME\_INTERFERON\_SIGNALING;REACTOME\_NEGATIVE\_REGULATORS\_OF\_RIG\_I\_MDA5

ANTIGEN\_PROCESSING\_PRESENTATION;REACTOME\_ANTIGEN\_PROCESSING\_UBIQUITINATION\_PATHWAYS

REACTOME\_SIGNALING\_BY\_NOTCH

\_MEDIATED\_ACTIVATION\_CASCADE;REACTOME\_HEMOSTASIS;REACTOME\_SIGNALING\_BY\_  
I\_PHASE

RANSPORT;REACTOME\_TRANSPORT\_OF\_GLUCOSE\_AND\_OTHER\_SUGARS\_BILE\_SALTS\_AI

SIGNALING\_BY\_ERBB2;REACTOME\_SIGNALING\_BY\_EGFR\_IN\_CANCER;REACTOME\_PI3K\_EVI

:ACTOME\_GPCR\_LIGAND\_BINDING  
\_PROCESSING\_PRESENTATION;REACTOME\_ANTIGEN\_PROCESSING\_UBIQUITINATION\_PRC  
\_PROCESSING\_PRESENTATION;REACTOME\_ANTIGEN\_PROCESSING\_UBIQUITINATION\_PRC

ME\_HS\_GAG\_BIOSYNTHESIS;REACTOME\_HEPARAN\_SULFATE\_HEPARIN\_HS\_GAG\_METABO  
ME\_HS\_GAG\_BIOSYNTHESIS;REACTOME\_HEPARAN\_SULFATE\_HEPARIN\_HS\_GAG\_METABO

BODY\_METABOLISM

ARAGINE\_N\_LINKED\_GLYCOSYLATION;REACTOME\_TRANSPORT\_TO\_THE\_GOLGI\_AND\_SUE

G;REACTOME\_NGF\_SIGNALLING\_VIA\_TRKA\_FROM\_THE\_PLASMA\_MEMBRANE;REACTOME\_

AMINOGLYCAN\_METABOLISM;REACTOME\_TRANSMEMBRANE\_TRANSPORT\_OF\_SMALL\_MOL  
AMINOGLYCAN\_METABOLISM;REACTOME\_TRANSMEMBRANE\_TRANSPORT\_OF\_SMALL\_MOL

MODULATION\_OF\_CELL\_SURFACE\_RECEPTORS\_BY\_RECRUITING\_THEM\_TO\_CLATHRIN\_AI

INELS

INELS

\_MRNA\_SPLICING

ANSCRIPTION\_PATHWAY;REACTOME\_METABOLISM\_OF\_LIPIDS\_AND\_LIPOPROTEINS;REACT

OME\_SIGNALING\_BY\_FGFR\_IN\_DISEASE;REACTOME\_SIGNALING\_BY\_FGFR

IGNALLING\_CASCADE;REACTOME\_INTEGRATION\_OF\_ENERGY\_METABOLISM;REACTOME\_RE

\_BY\_ILS;REACTOME\_IL\_3\_5\_AND\_GM-CSF\_SIGNALING;REACTOME\_IL\_RECEPTOR\_SHC\_SIG

LORED\_PROTEINS;REACTOME\_POST\_TRANSLATIONAL\_PROTEIN\_MODIFICATION

CLASS\_A1\_RHODOPSIN\_LIKE\_RECEPTORS;REACTOME\_G\_ALPHA\_Q\_SIGNALLING\_EVENT

MOLECULES

MOLECULES

REACTOME\_SIGNALING\_BY\_NOTCH

REACTOME\_AXON\_GUIDANCE;REACTOME\_G\_ALPHA1213\_SIGNALLING\_EVENTS;REACTOME

NOTCH\_EXPRESSION\_AND\_PROCESSING;REACTOME\_PRE\_NOTCH\_PROCESSING\_IN\_GOLGI

NOTCH\_EXPRESSION\_AND\_PROCESSING;REACTOME\_PRE\_NOTCH\_PROCESSING\_IN\_GOLGI

TRANSCRIPTION;REACTOME\_TRANSCRIPTION;REACTOME\_RNA\_POL\_I\_RNA\_POL\_III\_AND\_MITOCHOND

METABOLISM;REACTOME\_METABOLISM\_OF\_LIPIDS\_AND\_LIPOPROTEINS

PROTEIN\_PROCESSING\_PRESENTATION;REACTOME\_ANTIGEN\_PROCESSING\_UBIQUITINATION\_PRC

CELL\_DIVISION;REACTOME\_MITOTIC\_PROMETAPHASE

REACTOME\_NF\_KB\_SIGNALS\_DEATH\_THROUGH\_JNK;REACTOME\_CELL\_DEATH\_SIGNALLING

CREATION\_OF\_C4\_AND\_C2\_ACTIVATORS;REACTOME\_INITIAL\_TRIGGERING\_OF\_COMPLEM  
EVENTS;REACTOME\_G\_ALPHA\_Z\_SIGNALLING\_EVENTS  
MITOCHONDRIAL\_TRANSCRIPTION;REACTOME\_RNA\_POL\_III\_TRANSCRIPTION\_INITIATION\_FRO  
ET\_CYTOSOLIC\_CA2\_;REACTOME\_HEMOSTASIS;REACTOME\_PLATELET\_ACTIVATION\_SIGN  
INSULIN\_LIKE\_GROWTH\_FACTOR\_BINDING\_PROTEINS\_IGFBPS

REACTOME\_PROCESSING\_OF\_CAPPED\_INTRON\_CONTAINING\_PRE\_MRNA;REACTOME\_TRANS

NCAM\_SIGNALING\_FOR\_NEURITE\_OUT\_GROWTH

SYNTHESIS;REACTOME\_METABOLISM\_OF\_LIPIDS\_AND\_LIPOPROTEINS  
NCAM\_SIGNALING\_FOR\_NEURITE\_OUT\_GROWTH;REACTOME\_L1CAM\_INTERACTIONS  
STEM;REACTOME\_COMPLEMENT\_CASCADE

REACTOME\_OTHER\_SEMAPHORIN\_INTERACTIONS;REACTOME\_SEMA3A\_PAK\_DEPENDENT\_AXO  
REACTOME\_METABOLISM\_OF\_LIPIDS\_AND\_LIPOPROTEINS

PLATELET\_CYTOSOLIC\_CA2\_;REACTOME\_HEMOSTASIS;REACTOME\_PLATELET\_ACTIVATION\_S

ROUGH\_JNK;REACTOME\_CELL\_DEATH\_SIGNALLING\_VIA\_NRAGE\_NRIF\_AND\_NADE;REACTO

I\_CHANNELS

OME\_SIGNALING\_BY\_ERBB4;REACTOME\_DOWNREGULATION\_OF\_ERBB2\_ERBB3\_SIGNALING

:MODELLING\_OF\_PE;REACTOME\_GLYCEROPHOSPHOLIPID\_BIOSYNTHESIS;REACTOME\_ME  
\_ERBB4;REACTOME\_SIGNALING\_BY\_EGFR\_IN\_CANCER;REACTOME\_NUCLEAR\_SIGNALING\_

INSULIN\_SECRETION\_BY\_GLUCAGON\_LIKE\_PEPTIDE1;REACTOME\_REGULATION\_OF\_INSULIN

:TOME\_PPARA\_ACTIVATES\_GENE\_EXPRESSION;REACTOME\_RORA\_ACTIVATES\_CIRCADIAN

RANSPORT;REACTOME\_TRANSPORT\_OF\_INORGANIC\_CATIONS\_ANIONS\_AND\_AMINO\_ACID

TOME\_NCAM\_SIGNALING\_FOR\_NEURITE\_OUT\_GROWTH;REACTOME\_L1CAM\_INTERACTION  
TOME\_NCAM\_SIGNALING\_FOR\_NEURITE\_OUT\_GROWTH;REACTOME\_L1CAM\_INTERACTION

;REACTOME\_PHASE\_II\_CONJUGATION;REACTOME\_GLUCOSE\_METABOLISM  
:AF6\_MEDIATED\_INDUCION\_OF\_NFKB\_AND\_MAP\_KINASES\_UPON\_TLR7\_8\_OR\_9\_ACTIVAT

AMMA\_CARBOXYLATION\_TRANSPORT\_AND\_AMINO\_TERMINAL\_CLEAVAGE\_OF\_PROTEINS;F

\_MRNA\_SPLICING;REACTOME\_MRNA\_SPLICING\_MINOR\_PATHWAY

:EPLICATION;REACTOME\_MITOTIC\_PROMETAPHASE

E\_PLASMA\_MEMBRANE;REACTOME\_SIGNALLING\_TO\_ERKS;REACTOME\_P38MAPK\_EVENTS  
AMMA\_CARBOXYLATION\_TRANSPORT\_AND\_AMINO\_TERMINAL\_CLEAVAGE\_OF\_PROTEINS;F

1METABOLISM;REACTOME\_METABOLISM\_OF\_LIPIDS\_AND\_LIPOPROTEINS

NDING

.TION;REACTOME\_ENDOSOMAL\_SORTING\_COMPLEX\_REQUIRED\_FOR\_TRANSPORT\_ESCRT

;YNTHESES\_SECRETION\_AND\_INACTIVATION\_OF\_GIP;REACTOME\_INCRETIN\_SYNTHESIS\_SI  
;YNTHESES\_SECRETION\_AND\_INACTIVATION\_OF\_GIP;REACTOME\_INCRETIN\_SYNTHESIS\_SI

ALPHA\_HYDROXYCHOLESTEROL;REACTOME\_RECYCLING\_OF\_BILE\_ACIDS\_AND\_SALTS;RE/



CTOME\_RECRUITMENT\_OF\_MITOTIC\_CENTROSOME\_PROTEINS\_AND\_COMPLEXES;REACTOME\_INTEGRIN\_ALPHAIIIB\_BETA3\_SIGNALING;REACTOME\_REGULATION\_OF\_INSULIN\_SECRET  
SMITTER\_RECEPTOR\_BINDING\_AND\_DOWNSTREAM\_TRANSMISSION\_IN\_THE\_POSTSYNAP  
EVENTS;REACTOME\_CGMP\_EFFECTS;REACTOME\_NITRIC\_OXIDE\_STIMULATES\_GUANYLAT

\_SURFACE\_INTERACTIONS\_AT\_THE\_VASCULAR\_WALL;REACTOME\_PECAM1\_INTERACTION  
\_FORMATION;REACTOME\_SIGNALING\_BY\_PDGF;REACTOME\_AXON\_GUIDANCE;REACTOME\_  
MECHANISM\_BY\_IFN\_STIMULATED\_GENES;REACTOME\_SIGNALING\_BY\_FGFR\_IN\_DISEASE;F

BRANE\_TRANSPORT\_OF\_SMALL\_MOLECULES;REACTOME\_SLC\_MEDIATED\_TRANSMEMBR

PTOR\_SIGNALLING\_CASCADE;REACTOME\_NGF\_SIGNALLING\_VIA\_TRKA\_FROM\_THE\_PLASM

\_PEPTIDE\_LIGAND\_BINDING\_RECEPTORS;REACTOME\_CLASS\_A1\_RHODOPSIN\_LIKE\_RECE

DNA\_REPAIR  
SMITTER\_RELEASE\_CYCLE;REACTOME\_TRANSMEMBRANE\_TRANSPORT\_OF\_SMALL\_MOLE

ME\_SIGNALING\_BY\_ERBB4;REACTOME\_SIGNALING\_BY\_ERBB2;REACTOME\_GRB2\_EVENTS

INELS

RANSPORT;REACTOME\_TRANSPORT\_OF\_INORGANIC\_CATIONS\_ANIONS\_AND\_AMINO\_ACID  
NREGULATION\_OF\_TGF\_BETA\_RECEPTOR\_SIGNALING;REACTOME\_TGF\_BETA\_RECEPTOR

PSIN\_LIKE\_RECEPTORS;REACTOME\_CHEMOKINE\_RECEPTORS\_BIND\_CHEMOKINES;REACTO

ME\_FATTY\_ACID\_TRIACYLGLYCEROL\_AND\_KETONE\_BODY\_METABOLISM;REACTOME\_MET

OSIS

CTOME\_OTHER\_SEMAPHORIN\_INTERACTIONS;REACTOME\_SEMA3A\_PAK\_DEPENDENT\_AXI

THE\_FANCONI\_ANEMIA\_PATHWAY;REACTOME\_FANCONI\_ANEMIA\_PATHWAY;REACTOME\_DI

\_OF\_SMAD2\_3\_SMAD4\_TRANSCRIPTIONAL\_ACTIVITY;REACTOME\_GENERIC\_TRANSCRIPTIOI

'CLASE;REACTOME\_PLATELET\_HOMEOSTASIS;REACTOME\_HEMOSTASIS;REACTOME\_POTA

ISM

PSIN\_LIKE\_RECEPTORS;REACTOME\_GPCR\_DOWNSTREAM\_SIGNALING;REACTOME\_G\_ALPHA

OME\_METABOLISM\_OF\_PROTEINS;REACTOME\_POST\_TRANSLATIONAL\_PROTEIN\_MODIFICATION

D\_PROTEIN\_RESPONSE

\_IFN\_ALPHA\_BETA\_PATHWAYS;REACTOME\_INNATE\_IMMUNE\_SYSTEM;REACTOME\_IMMUNE\_SYSTEM

SMITTER\_RECEPTOR\_BINDING\_AND\_DOWNSTREAM\_TRANSMISSION\_IN\_THE\_POSTSYNAPTIC

RANSPORT;REACTOME\_TRANSPORT\_OF\_INORGANIC\_CATIONS\_ANIONS\_AND\_AMINO\_ACIDS

31\_S\_PHASES

'COSAMINOGLYCAN\_METABOLISM;REACTOME\_METABOLISM\_OF\_CARBOHYDRATES

SLATIONAL\_PROTEIN\_MODIFICATION

RANSPORT;REACTOME\_TRANSPORT\_OF\_INORGANIC\_CATIONS\_ANIONS\_AND\_AMINO\_ACID  
ROTEINS\_AND\_COMPLEXES;REACTOME\_LOSS\_OF\_NLP\_FROM\_MITOTIC\_CENTROSOMES;R

RANSPORT;REACTOME\_TRANSPORT\_OF\_INORGANIC\_CATIONS\_ANIONS\_AND\_AMINO\_ACID

!EACTOME\_GASTRIN\_CREB\_SIGNALLING\_PATHWAY\_VIA\_PKC\_AND\_MAPK;REACTOME\_NRA  
!EACTOME\_GASTRIN\_CREB\_SIGNALLING\_PATHWAY\_VIA\_PKC\_AND\_MAPK;REACTOME\_NRA

IGNALLING\_CASCADE;REACTOME\_REGULATION\_OF\_AMPK\_ACTIVITY\_VIA\_LKB1;REACTOME\_BODY\_METABOLISM  
ME\_FATTY\_ACID\_TRIACYLGLYCEROL\_AND\_KETONE\_BODY\_METABOLISM;REACTOME\_CHC

DOWNSTREAM\_SIGNALING;REACTOME\_G\_ALPHA\_S\_SIGNALLING\_EVENTS

MOSOME\_MAINTENANCE;REACTOME\_DEPOSITION\_OF\_NEW\_CENPA\_CONTAINING\_NUCLEC

TOME\_IL\_7\_SIGNALING;REACTOME\_SIGNALING\_BY\_ERBB4;REACTOME\_SIGNALING\_BY\_ERE  
I\_REPLICATION\_STRESS;REACTOME\_G2\_M\_CHECKPOINTS

.FATE\_DERMATAN\_SULFATE\_METABOLISM;REACTOME\_HEPARAN\_SULFATE\_HEPARIN\_HS\_

.YCOSPHINGOLIPID\_METABOLISM;REACTOME\_PHOSPHOLIPID\_METABOLISM;REACTOME\_T

S;REACTOME\_SEMAPHORIN\_INTERACTIONS

.IN\_A\_B1\_ASSOCIATED\_EVENTS\_DURING\_G2\_M\_TRANSITION;REACTOME\_MITOTIC\_G2\_G2\_  
.IN\_A\_B1\_ASSOCIATED\_EVENTS\_DURING\_G2\_M\_TRANSITION;REACTOME\_MITOTIC\_G2\_G2\_  
I;REACTOME\_CYTOKINE\_SIGNALING\_IN\_IMMUNE\_SYSTEM  
I;REACTOME\_CYTOKINE\_SIGNALING\_IN\_IMMUNE\_SYSTEM

HOMEOSTASIS;REACTOME\_HEMOSTASIS

REACTOME\_SIGNALING\_BY\_FGFR\_IN\_DISEASE;REACTOME\_SIGNALING\_BY\_FGFR\_MUTANTS;F  
REACTOME\_SIGNALING\_BY\_FGFR\_IN\_DISEASE;REACTOME\_SIGNALING\_BY\_FGFR\_MUTANTS;F  
REACTOME\_SIGNALING\_BY\_FGFR\_IN\_DISEASE;REACTOME\_SIGNALING\_BY\_FGFR\_MUTANTS;F

REACTOME\_PEPTIDE\_CHAIN\_ELONGATION;REACTOME\_METABOLISM\_OF\_PROTEINS;REACTO  
REACTOME\_GPCR\_LIGAND\_BINDING

ASPARAGINE\_N\_LINKED\_GLYCOSYLATION;REACTOME\_TRANSPORT\_TO\_THE\_GOLGI\_AND\_SUE  
THESIS\_OF\_SUBSTRATES\_IN\_N\_GLYCAN\_BIOSYTHESIS;REACTOME\_ASPARAGINE\_N\_LINKED

ASSOCIATED\_VESICLE\_BIOGENESIS

REACTOME\_DOUBLE\_STRAND\_BREAK\_REPAIR;REACTOME\_DNA\_REPAIR

\_SIGNALING\_BY\_EGFR\_IN\_CANCER;REACTOME\_ANTIGEN\_ACTIVATES\_B\_CELL\_RECEPTOR

REACTOME\_PEPTIDE\_CHAIN\_ELONGATION;REACTOME\_METABOLISM\_OF\_PROTEINS;REACTO

VALING\_OF\_ACTIVATED\_FGFR;REACTOME\_SIGNALING\_BY\_FGFR

ISM

RANSPORT;REACTOME\_TRANSPORT\_OF\_VITAMINS\_NUCLEOSIDES\_AND\_RELATED\_MOLEC

CTOME\_NEURONAL\_SYSTEM



\_ISM;REACTOME\_METABOLISM\_OF\_CARBOHYDRATES

SIS

SIS

SIS

RT;REACTOME\_LIPOPROTEIN\_METABOLISM

\_PROCESSING\_PRESENTATION;REACTOME\_ANTIGEN\_PROCESSING\_UBIQUITINATION\_PRC

3OLISM;REACTOME\_GLYCOSAMINOGLYCAN\_METABOLISM;REACTOME\_METABOLISM\_OF\_C  
3\_IN\_B\_CELLS;REACTOME\_SIGNALING\_BY\_THE\_B\_CELL\_RECEPTOR\_BCR;REACTOME\_TCR

E\_G\_ALPHA\_Q\_SIGNALLING\_EVENTS;REACTOME\_GPCR\_DOWNSTREAM\_SIGNALING;REACT

MOLECULES

ISM

/ATION\_OF\_IKKS\_COMPLEX;REACTOME\_MAP\_KINASE\_ACTIVATION\_IN\_TLR\_CASCADE;REA

.DING;REACTOME\_METABOLISM\_OF\_PROTEINS

CTRON\_TRANSPORT;REACTOME\_METABOLISM\_OF\_AMINO\_ACIDS\_AND\_DERIVATIVES;REA  
\_SIGNALING\_BY\_EGFR\_IN\_CANCER;REACTOME\_NGF\_SIGNALLING\_VIA\_TRKA\_FROM\_THE\_I  
INSULIN\_LIKE\_GROWTH\_FACTOR\_BINDING\_PROTEINS\_IGFBPS

SLATIONAL\_PROTEIN\_MODIFICATION

SIS  
BINDING

ME\_SIGNALING\_BY\_NOTCH

ACE\_INTERACTIONS\_AT\_THE\_VASCULAR\_WALL;REACTOME\_COLLAGEN\_FORMATION;REA  
\_PROCESSING\_PRESENTATION;REACTOME\_ANTIGEN\_PROCESSING\_UBIQUITINATION\_PRC

OME\_METABOLISM\_OF\_PROTEINS;REACTOME\_POST\_TRANSLATIONAL\_PROTEIN\_MODIFICATION;  
/FGFR1\_FUSION\_MUTANTS;REACTOME\_SIGNALING\_BY\_FGFR\_MUTANTS

MES;REACTOME\_ANTIGEN\_PROCESSING\_CROSS\_PRESENTATION;REACTOME\_ER\_PHAGOSOMES;  
FROM\_CHROMATIN;REACTOME\_ASSOCIATION\_OF\_LICENSING\_FACTORS\_WITH\_THE\_PRE

L\_JUNCTION\_ORGANIZATION  
BINDING

E\_G\_ALPHA\_Q\_SIGNALLING\_EVENTS;REACTOME\_GPCR\_DOWNSTREAM\_SIGNALING;REACTOME\_GPCR\_DOWNSTREAM\_SIGNALING;  
E\_G\_ALPHA\_Q\_SIGNALLING\_EVENTS;REACTOME\_GPCR\_DOWNSTREAM\_SIGNALING;REACTOME\_GPCR\_DOWNSTREAM\_SIGNALING;  
RIUM\_TUBERCULOSIS;REACTOME\_TRANSMEMBRANE\_TRANSPORT\_OF\_SMALL\_MOLECULES

INFECTION\_OF\_HOMO\_SAPIENS\_WITH\_MYCOBACTERIUM\_TUBERCULOSIS;REACTOME\_ENERGY\_METABOLISM;  
\_DARPP\_32\_EVENTS;REACTOME\_AXON\_GUIDANCE;REACTOME\_CRMP5\_IN\_SEMA3A\_SIGNALLING;  
SIGNALLING\_CASCADE;REACTOME\_INTEGRATION\_OF\_ENERGY\_METABOLISM;REACTOME\_INTEGRATION\_OF\_ENERGY\_METABOLISM;  
SIGNALLING\_CASCADE;REACTOME\_INTEGRATION\_OF\_ENERGY\_METABOLISM;REACTOME\_INTEGRATION\_OF\_ENERGY\_METABOLISM

\_PROCESSING\_PRESENTATION;REACTOME\_ANTIGEN\_PROCESSING\_UBIQUITINATION\_PRC

ARGINE\_N\_LINKED\_GLYCOSYLATION

OSTASIS

N\_RECEPTOR\_SIGNALLING\_CASCADE;REACTOME\_SIGNALING\_BY\_FGFR\_IN\_DISEASE;REAC  
N\_RECEPTOR\_SIGNALLING\_CASCADE;REACTOME\_SIGNALING\_BY\_FGFR\_IN\_DISEASE;REAC

I\_REPLACEMENT\_PATHWAY;REACTOME\_BASE\_FREE\_SUGAR\_PHOSPHATE\_REMOVAL\_VIA\_

EVENTS

;REPTIONAL\_REGULATION\_OF\_WHITE\_ADIPOCYTE\_DIFFERENTIATION;REACTOME\_HORMON

;REACTOME\_FATTY\_ACID\_TRIACYLGLYCEROL\_AND\_KETONE\_BODY\_METABOLISM

;REACTOME\_FATTY\_ACID\_TRIACYLGLYCEROL\_AND\_KETONE\_BODY\_METABOLISM

INELS

I\_CHANNELS

ASPASE\_MEDIATED\_CLEAVAGE\_OF\_CYTOSKELETAL\_PROTEINS;REACTOME\_CELL\_JUNCTI

IAPSES;REACTOME\_NEURONAL\_SYSTEM;REACTOME\_NEUROTRANSMITTER\_RELEASE\_CYC

CHONDRIAL\_TRANSCRIPTION;REACTOME\_RNA\_POL\_III\_TRANSCRIPTION\_TERMINATION

RANSPORT;REACTOME\_TRANSPORT\_OF\_INORGANIC\_CATIONS\_ANIONS\_AND\_AMINO\_ACID

PORT;REACTOME\_RESPIRATORY\_ELECTRON\_TRANSPORT\_ATP\_SYNTHESIS\_BY\_CHEMIOSM

.L\_JUNCTION\_ORGANIZATION

\_RAS;REACTOME\_NGF\_SIGNALLING\_VIA\_TRKA\_FROM\_THE\_PLASMA\_MEMBRANE;REACTOM

INSULIN\_LIKE\_GROWTH\_FACTOR\_BINDING\_PROTEINS\_IGFBPS

ROTEINS\_AND\_COMPLEXES;REACTOME\_LOSS\_OF\_NLP\_FROM\_MITOTIC\_CENTROSOMES;R

SIGNALING\_BY\_ERBB2;REACTOME\_SIGNALING\_BY\_EGFR\_IN\_CANCER;REACTOME\_PI3K\_EV  
\_PROCESSING\_PRESENTATION;REACTOME\_ANTIGEN\_PROCESSING\_UBIQUITINATION\_PRC  
APSES;REACTOME\_NEURONAL\_SYSTEM;REACTOME\_NEUROTRANSMITTER\_RELEASE\_CYC

\_L\_CELL\_COMMUNICATION;REACTOME\_CASPASE\_MEDIATED\_CLEAVAGE\_OF\_CYTOSKELET  
\_L\_CELL\_COMMUNICATION;REACTOME\_CASPASE\_MEDIATED\_CLEAVAGE\_OF\_CYTOSKELET  
\_L\_CELL\_COMMUNICATION;REACTOME\_CASPASE\_MEDIATED\_CLEAVAGE\_OF\_CYTOSKELET  
\_L\_CELL\_COMMUNICATION;REACTOME\_CASPASE\_MEDIATED\_CLEAVAGE\_OF\_CYTOSKELET

/ERSION\_TRANSAMINATION;REACTOME\_TRYPTOPHAN\_CATABOLISM  
/ERSION\_TRANSAMINATION;REACTOME\_TRYPTOPHAN\_CATABOLISM  
THESIS\_OF\_SUBSTRATES\_IN\_N\_GLYCAN\_BIOSYTHESIS;REACTOME\_ASPARAGINE\_N\_LINKE

N\_EVENTS;REACTOME\_NGF\_SIGNALLING\_VIA\_TRKA\_FROM\_THE\_PLASMA\_MEMBRANE;REA

TION;REACTOME\_TRANSCRIPTION;REACTOME\_RNA\_POL\_I\_RNA\_POL\_III\_AND\_MITOCHONC  
E\_PLASMA\_MEMBRANE;REACTOME\_SIGNALLING\_TO\_ERKS;REACTOME\_P38MAPK\_EVENTS

\_FORMATION;REACTOME\_SIGNALING\_BY\_PDGF;REACTOME\_AXON\_GUIDANCE;REACTOME\_  
\_FORMATION;REACTOME\_SIGNALING\_BY\_PDGF;REACTOME\_AXON\_GUIDANCE;REACTOME\_  
\_FORMATION;REACTOME\_SIGNALING\_BY\_PDGF;REACTOME\_AXON\_GUIDANCE;REACTOME\_

'6\_MEDIATED\_NFKB\_ACTIVATION;REACTOME\_RIG\_I\_MDA5\_MEDIATED\_INDUCION\_OF\_IFN\_  
ARAGINE\_N\_LINKED\_GLYCOSYLATION;REACTOME\_CALNEXIN\_CALRETICULIN\_CYCLE;REAC  
RANSPORT;REACTOME\_TRANSPORT\_OF\_INORGANIC\_CATIONS\_ANIONS\_AND\_AMINO\_ACID

SPORT;REACTOME\_STEROID\_HORMONES;REACTOME\_METABOLISM\_OF\_LIPIDS\_AND\_LIPC  
SPORT;REACTOME\_STEROID\_HORMONES;REACTOME\_METABOLISM\_OF\_LIPIDS\_AND\_LIPC

:GRINS;REACTOME\_GRB2\_SOS\_PROVIDES\_LINKAGE\_TO\_MAPK\_SIGNALING\_FOR\_INTERGR

INTHESIS;REACTOME\_TRANSMISSION\_ACROSS\_CHEMICAL\_SYNAPSES;REACTOME\_NEURON



STRATE\_TYPE;REACTOME\_PHASE1\_FUNCTIONALIZATION\_OF\_COMPOUNDS

OME\_SIGNALING\_BY\_THE\_B\_CELL\_RECEPTOR\_BCR;REACTOME\_SIGNALING\_BY\_ILS;REACT

'COSAMINOGLYCAN\_METABOLISM;REACTOME\_METABOLISM\_OF\_CARBOHYDRATES

N\_FORMATION;REACTOME\_CELL\_JUNCTION\_ORGANIZATION

NCAM\_SIGNALING\_FOR\_NEURITE\_OUT\_GROWTH

:C\_MEDIATED\_ATTRACTIVE\_SIGNALING;REACTOME\_FACTORS\_INVOLVED\_IN\_MEGAKARYO  
:C\_MEDIATED\_ATTRACTIVE\_SIGNALING;REACTOME\_FACTORS\_INVOLVED\_IN\_MEGAKARYO

.SE1\_FUNCTIONALIZATION\_OF\_COMPOUNDS;REACTOME\_METABOLISM\_OF\_POLYAMINES  
.SE1\_FUNCTIONALIZATION\_OF\_COMPOUNDS;REACTOME\_METABOLISM\_OF\_POLYAMINES  
.SE1\_FUNCTIONALIZATION\_OF\_COMPOUNDS;REACTOME\_METABOLISM\_OF\_POLYAMINES

MES;REACTOME\_ANTIGEN\_PROCESSING\_CROSS\_PRESENTATION;REACTOME\_ER\_PHAGOS

.TION\_OF\_CELL\_SURFACE\_RECEPTORS\_BY\_RECRUITING\_THEM\_TO\_CLATHRIN\_ADAPTERS

OME\_METABOLISM\_OF\_PROTEINS;REACTOME\_POST\_TRANSLATIONAL\_PROTEIN\_MODIFIC/  
OME\_METABOLISM\_OF\_PROTEINS;REACTOME\_POST\_TRANSLATIONAL\_PROTEIN\_MODIFIC/  
OME\_METABOLISM\_OF\_PROTEINS;REACTOME\_POST\_TRANSLATIONAL\_PROTEIN\_MODIFIC/  
OME\_METABOLISM\_OF\_PROTEINS;REACTOME\_POST\_TRANSLATIONAL\_PROTEIN\_MODIFIC/

OME\_METABOLISM\_OF\_PROTEINS;REACTOME\_POST\_TRANSLATIONAL\_PROTEIN\_MODIFIC/

IMMUNE\_SYSTEM;REACTOME\_ADAPTIVE\_IMMUNE\_SYSTEM

IGNALING

SSION;REACTOME\_RORA\_ACTIVATES\_CIRCADIAN\_EXPRESSION;REACTOME\_CIRCADIAN\_R

REAM\_SIGNALING;REACTOME\_G\_ALPHA\_S\_SIGNALLING\_EVENTS;REACTOME\_CGMP\_EFFE  
EACTOME\_CYTOCHROME\_P450\_ARRANGED\_BY\_SUBSTRATE\_TYPE;REACTOME\_PHASE1\_F

TRIN\_CREB\_SIGNALLING\_PATHWAY\_VIA\_PKC\_AND\_MAPK;REACTOME\_SIGNALING\_BY\_GPC  
CTRON\_TRANSPORT;REACTOME\_PYRUVATE\_METABOLISM  
RANSPORT;REACTOME\_TRANSPORT\_OF\_GLUCOSE\_AND\_OTHER\_SUGARS\_BILE\_SALTS\_AI

SKELETAL\_PROTEINS;REACTOME\_APOPTOSIS;REACTOME\_APOPTOTIC\_EXECUTION\_PHASE

\_LIPIDS\_AND\_LIPOPROTEINS;REACTOME\_FATTY\_ACID\_TRIACYLGLYCEROL\_AND\_KETONE  
ROTEINS\_AND\_COMPLEXES;REACTOME\_LOSS\_OF\_NLP\_FROM\_MITOTIC\_CENTROSOMES;R

IGNALING

IGNALING

IGNALING

\_ATION\_DEPENDENT\_MRNA\_DECAY;REACTOME\_METABOLISM\_OF\_RNA

\_METABOLISM\_OF\_LIPIDS\_AND\_LIPOPROTEINS;REACTOME\_FATTY\_ACID\_TRIACYLGLYCEF

SCRIPT\_TO\_CYTOPLASM;REACTOME\_MRNA\_PROCESSING;REACTOME\_TRANSPORT\_OF\_M.

SIGNALING\_BY\_ERBB2;REACTOME\_SIGNALING\_BY\_EGFR\_IN\_CANCER;REACTOME\_PI3K\_EVI  
\_GLUCOSE\_METABOLISM

D\_PROTEIN\_RESPONSE

SYNTHESIS\_ON\_THE\_LAGGING\_STRAND;REACTOME\_CELL\_CYCLE\_MITOTIC;REACTOME\_M\_G  
I\_CHANNELS

PLATELET\_PRODUCTION;REACTOME\_KINESINS;REACTOME\_HEMOSTASIS;RE/

ACTIVATES\_SMADS;REACTOME\_SIGNALING\_BY\_GPCR;REACTOME\_OPIOID\_SIGNALLING;R  
ORT;REACTOME\_RESPIRATORY\_ELECTRON\_TRANSPORT\_ATP\_SYNTHESIS\_BY\_CHEMIOSM  
RIUM\_TUBERCULOSIS;REACTOME\_TRANSMEMBRANE\_TRANSPORT\_OF\_SMALL\_MOLECULE

METABOLISM;REACTOME\_METABOLISM\_OF\_LIPIDS\_AND\_LIPOPROTEINS  
TRANSPORT;REACTOME\_TRANSPORT\_OF\_VITAMINS\_NUCLEOSIDES\_AND\_RELATED\_MOLEC

STEM  
HEMOSTASIS

REACTOME\_IMMUNE\_SYSTEM;REACTOME\_ADAPTIVE\_IMMUNE\_SYSTEM;REACTOME\_CLASS\_I  
ISM;REACTOME\_METABOLISM\_OF\_LIPIDS\_AND\_LIPOPROTEINS;REACTOME\_FATTY\_ACID\_T  
REACTOME\_CELL\_CYCLE\_CHECKPOINTS;REACTOME\_HOMOLOGOUS\_RECOMBINATION\_REPAIR

REPLICATION;REACTOME\_MITOTIC\_PROMETAPHASE  
CELL\_JUNCTION\_ORGANIZATION;REACTOME\_CELL\_JUNCTION\_ORGANIZATION

INTERACTION\_BETWEEN\_L1\_AND\_ANKYRINS

TRANSCRIPTION\_DEPENDENT\_MRNA\_DECAY;REACTOME\_METABOLISM\_OF\_RNA

REACTOME\_NRAGE\_SIGNALS\_DEATH\_THROUGH\_JNK;REACTOME\_CELL\_DEATH\_SIGNALLIN  
REACTOME\_NRAGE\_SIGNALS\_DEATH\_THROUGH\_JNK;REACTOME\_CELL\_DEATH\_SIGNALLIN  
IGNALING

ASES

INELS

IRIN\_ADAPTERS;REACTOME\_DEFENSINS;REACTOME\_TCR\_SIGNALING;REACTOME\_DOWNS

YNTHESIS\_OF\_PIPS\_AT\_THE\_PLASMA\_MEMBRANE;REACTOME\_PI\_METABOLISM;REACTOME  
YNTHESIS\_OF\_PIPS\_AT\_THE\_PLASMA\_MEMBRANE;REACTOME\_PI\_METABOLISM;REACTOME  
\_TRANSMEMBRANE\_TRANSPORT\_OF\_SMALL\_MOLECULES;REACTOME\_SLC\_MEDIATED\_TR

OME\_METABOLISM\_OF\_PROTEINS;REACTOME\_POST\_TRANSLATIONAL\_PROTEIN\_MODIFIC/  
OME\_METABOLISM\_OF\_PROTEINS;REACTOME\_POST\_TRANSLATIONAL\_PROTEIN\_MODIFIC/

\_SIGNALING\_BY\_EGFR\_IN\_CANCER;REACTOME\_NGF\_SIGNALLING\_VIA\_TRKA\_FROM\_THE\_I

INTEGRIN\_CELL\_SURFACE\_INTERACTIONS;REACTOME\_IMMUNE\_SYSTEM;REACTOME\_ADA

MEDIATED\_TRANSFER\_OF\_SUBSTRATE\_TO\_CCT\_TRIC;REACTOME\_PROTEIN\_FOLDING;REA

AMINOGLYCAN\_METABOLISM;REACTOME\_METABOLISM\_OF\_CARBOHYDRATES  
I\_REPLACEMENT\_PATHWAY;REACTOME\_BASE\_FREE\_SUGAR\_PHOSPHATE\_REMOVAL\_VIA\_

\_OF\_LIPIDS\_AND\_LIPOPROTEINS;REACTOME\_FATTY\_ACID\_TRIACYLGLYCEROL\_AND\_KETOI  
DE\_STIMULATES\_GUANYLATE\_CYCLASE;REACTOME\_PLATELET\_HOMEOSTASIS;REACTOME

ARAGINE\_N\_LINKED\_GLYCOSYLATION;REACTOME\_N\_GLYCAN\_TRIMMING\_IN\_THE\_ER\_AND  
RON\_SIGNALING;REACTOME\_IMMUNE\_SYSTEM;REACTOME\_CYTOKINE\_SIGNALING\_IN\_IMM

:EPLICATION;REACTOME\_MITOTIC\_PROMETAPHASE  
:EPLICATION;REACTOME\_MITOTIC\_PROMETAPHASE  
SOCIATED\_VESICLE\_BIOGENESIS

SLATIONAL\_PROTEIN\_MODIFICATION

/\_FGFR1\_FUSION\_MUTANTS;REACTOME\_SIGNALING\_BY\_FGFR\_MUTANTS

SCRIPTION\_COUPLED\_NER\_TC\_NER;REACTOME\_POL\_SWITCHING;REACTOME\_NUCLEOTII

;REACTOME\_FATTY\_ACID\_TRIACYLGLYCEROL\_AND\_KETONE\_BODY\_METABOLISM

\_FORMATION;REACTOME\_INTEGRIN\_CELL\_SURFACE\_INTERACTIONS;REACTOME\_SIGNALIN

3ATION\_COMPLEX\_;REACTOME\_ELONGATION\_ARREST\_AND\_RECOVERY;REACTOME\_RNA\_

Ξ\_AMINO\_ACID\_TRANSPORT\_ACROSS\_THE\_PLASMA\_MEMBRANE;REACTOME\_TRANSMEME

AND\_BINDING\_RECEPTORS;REACTOME\_PROSTANOID\_LIGAND\_RECEPTORS;REACTOME\_G

OME\_CELL\_EXTRACELLULAR\_MATRIX\_INTERACTIONS;REACTOME\_CELL\_JUNCTION\_ORGAN

Ξ\_CLASS\_A1\_RHODOPSIN\_LIKE\_RECEPTORS;REACTOME\_G\_ALPHA\_Q\_SIGNALLING\_EVENT

I;REACTOME\_CYTOKINE\_SIGNALING\_IN\_IMMUNE\_SYSTEM

ME\_SIGNALING\_BY\_NOTCH

MENT\_AND\_PLATELET\_PRODUCTION;REACTOME\_KINESINS;REACTOME\_HEMOSTASIS;RE/

ME\_TETRAHYDROBIOPTERIN\_BH4\_SYNTHESIS\_RECYCLING\_SALVAGE\_AND\_REGULATION;

ME\_SIGNALING\_BY\_NOTCH2;REACTOME\_SIGNALING\_BY\_NOTCH1;REACTOME\_SIGNALING\_  
TION;REACTOME\_TRANSCRIPTION;REACTOME\_RNA\_POL\_I\_RNA\_POL\_III\_AND\_MITOCHONE

ES;REACTOME\_ION\_CHANNEL\_TRANSPORT

\_PROCESSING\_PRESENTATION;REACTOME\_ANTIGEN\_PROCESSING\_UBIQUITINATION\_PRC  
\_PROCESSING\_PRESENTATION;REACTOME\_ANTIGEN\_PROCESSING\_UBIQUITINATION\_PRC

SMITTER\_RECEPTOR\_BINDING\_AND\_DOWNSTREAM\_TRANSMISSION\_IN\_THE\_POSTSYNAP

GNALING\_BY\_ROBO\_RECEPTOR

CAL\_SYNAPSES;REACTOME\_NEURONAL\_SYSTEM;REACTOME\_SIGNALING\_BY\_GPCR;REAC  
UT\_GROWTH;REACTOME\_L1CAM\_INTERACTIONS;REACTOME\_INTERACTION\_BETWEEN\_L1  
UT\_GROWTH;REACTOME\_L1CAM\_INTERACTIONS;REACTOME\_INTERACTION\_BETWEEN\_L1.



OME\_POST\_TRANSLATIONAL\_MODIFICATION\_SYNTHESIS\_OF\_GPI\_ANCHORED\_PROTEINS;f

ES;REACTOME\_ION\_CHANNEL\_TRANSPORT

NS;REACTOME\_AQUAPORIN\_MEDIATED\_TRANSPORT

REACTOME\_CYTOCHROME\_P450\_ARRANGED\_BY\_SUBSTRATE\_TYPE;REACTOME\_PHASE1\_F

ROUGH\_JNK;REACTOME\_CELL\_DEATH\_SIGNALLING\_VIA\_NF\_KB\_NF\_TAU2\_AND\_NF\_TAU1;REACTO

RANSPORT;REACTOME\_TRANSPORT\_OF\_GLUCOSE\_AND\_OTHER\_SUGARS\_BILE\_SALTS\_AI

EVENTS

PROTEIN\_LIKE\_RECEPTORS;REACTOME\_GPCR\_DOWNSTREAM\_SIGNALING;REACTOME\_G\_ALPHA\_SIS

REACTOME\_PEPTIDE\_CHAIN\_ELONGATION;REACTOME\_METABOLISM\_OF\_PROTEINS;REACTO

REACTOME\_PPARG\_ACTIVATES\_GENE\_EXPRESSION;REACTOME\_PRE\_NOTCH\_TRANSCRIPTION  
REACTOME\_PPARG\_ACTIVATES\_GENE\_EXPRESSION;REACTOME\_PRE\_NOTCH\_TRANSCRIPTION  
REACTOME\_PPARG\_ACTIVATES\_GENE\_EXPRESSION;REACTOME\_PRE\_NOTCH\_TRANSCRIPTION  
\_SIGNALING\_BY\_EGFR\_IN\_CANCER;REACTOME\_NGF\_SIGNALLING\_VIA\_TRKA\_FROM\_THE\_F

REACTOME\_CYTOKINE\_SIGNALING\_IN\_IMMUNE\_SYSTEM  
REACTOME\_CYTOKINE\_SIGNALING\_IN\_IMMUNE\_SYSTEM

MOLECULES

REGULATED\_BY\_THE\_EXON\_JUNCTION\_COMPLEX

3Y\_INSULIN\_RECEPTOR;REACTOME\_MTORC1\_MEDIATED\_SIGNALLING;REACTOME\_PI3K\_C/

E\_TRANSMEMBRANE\_TRANSPORT\_OF\_SMALL\_MOLECULES;REACTOME\_PLATELET\_HOME(

CTIONS;REACTOME\_HEMOSTASIS

.GLUCOSE\_METABOLISM

ACTOME\_PROCESSING\_OF\_CAPPED\_INTRON\_CONTAINING\_PRE\_MRNA;REACTOME\_TRAN  
ACTOME\_PROCESSING\_OF\_CAPPED\_INTRON\_CONTAINING\_PRE\_MRNA;REACTOME\_TRAN  
LIPID\_DIGESTION\_MOBILIZATION\_AND\_TRANSPORT;REACTOME\_LIPOPROTEIN\_METABOLIS

RANSPORT;REACTOME\_TRANSPORT\_OF\_INORGANIC\_CATIONS\_ANIONS\_AND\_AMINO\_ACID

RANSPORT;REACTOME\_TRANSPORT\_OF\_INORGANIC\_CATIONS\_ANIONS\_AND\_AMINO\_ACID  
SIS;REACTOME\_PACKAGING\_OF\_TELOMERE\_ENDS;REACTOME\_TELOMERE\_MAINTENANCE

GRINS;REACTOME\_INTEGRIN\_ALPHAIIIB\_BETA3\_SIGNALING;REACTOME\_SIGNALING\_BY\_PC

ME\_SIGNALING\_BY\_THE\_B\_CELL\_RECEPTOR\_BCR;REACTOME\_GPVI\_MEDIATED\_ACTIVATI

RIPTION;REACTOME\_RNA\_POL\_I\_RNA\_POL\_III\_AND\_MITOCHONDRIAL\_TRANSCRIPTION;REA

\_MRNA\_SPLICING;REACTOME\_MRNA\_SPLICING\_MINOR\_PATHWAY

HANCED\_BY\_THE\_EXON\_JUNCTION\_COMPLEX  
HANCED\_BY\_THE\_EXON\_JUNCTION\_COMPLEX

SMITTER\_RECEPTOR\_BINDING\_AND\_DOWNSTREAM\_TRANSMISSION\_IN\_THE\_POSTSYNAP  
\_PROCESSING\_PRESENTATION;REACTOME\_ANTIGEN\_PROCESSING\_UBIQUITINATION\_PRC

RANSPORT;REACTOME\_TRANSPORT\_OF\_GLUCOSE\_AND\_OTHER\_SUGARS\_BILE\_SALTS\_AI

\_CAPPED\_INTRON\_CONTAINING\_PRE\_MRNA;REACTOME\_RNA\_POL\_II\_TRANSCRIPTION;REA

PI\_METABOLISM;REACTOME\_SIGNALING\_BY\_GPCR;REACTOME\_GPVI\_MEDIATED\_ACTIVATI

'COSAMINOGLYCAN\_METABOLISM;REACTOME\_METABOLISM\_OF\_CARBOHYDRATES

:TOME\_SIGNALING\_BY\_ERBB4;REACTOME\_NUCLEAR\_SIGNALING\_BY\_ERBB4;REACTOME\_P

:TOME\_SIGNALING\_BY\_ERBB4;REACTOME\_NUCLEAR\_SIGNALING\_BY\_ERBB4;REACTOME\_P

:TIVATED\_TAK1\_MEDIATES\_P38\_MAPK\_ACTIVATION;REACTOME\_TRAF6\_MEDIATED\_INDUCT

DE\_STIMULATES\_GUANYLATE\_CYCLASE;REACTOME\_PLATELET\_HOMEOSTASIS;REACTOME

RANSPORT;REACTOME\_TRANSPORT\_OF\_GLUCOSE\_AND\_OTHER\_SUGARS\_BILE\_SALTS\_AI

RANSPORT;REACTOME\_TRANSPORT\_OF\_GLUCOSE\_AND\_OTHER\_SUGARS\_BILE\_SALTS\_AI

/\_FGFR1\_FUSION\_MUTANTS;REACTOME\_SIGNALING\_BY\_FGFR\_MUTANTS

.TION\_OF\_CELL\_SURFACE\_RECEPTORS\_BY\_RECRUITING\_THEM\_TO\_CLATHRIN\_ADAPTERS

.ONAL\_SYSTEM;REACTOME\_AXON\_GUIDANCE;REACTOME\_NCAM1\_INTERACTIONS;REACTC

EACTOME\_PEPTIDE\_CHAIN\_ELONGATION;REACTOME\_METABOLISM\_OF\_PROTEINS;REACTC

SIGNALING\_BY\_ERBB2;REACTOME\_GRB2\_EVENTS\_IN\_ERBB2\_SIGNALING;REACTOME\_PI3K\_E  
SIN\_LIKE\_RECEPTORS;REACTOME\_CHEMOKINE\_RECEPTORS\_BIND\_CHEMOKINES;REACTO

GNALING;REACTOME\_NGF\_SIGNALLING\_VIA\_TRKA\_FROM\_THE\_PLASMA\_MEMBRANE;REAC  
GNALING;REACTOME\_NGF\_SIGNALLING\_VIA\_TRKA\_FROM\_THE\_PLASMA\_MEMBRANE;REAC  
GNALING;REACTOME\_NGF\_SIGNALLING\_VIA\_TRKA\_FROM\_THE\_PLASMA\_MEMBRANE;REAC

SMITTER\_RECEPTOR\_BINDING\_AND\_DOWNSTREAM\_TRANSMISSION\_IN\_THE\_POSTSYNAP  
\_PROCESSING\_PRESENTATION;REACTOME\_ANTIGEN\_PROCESSING\_UBIQUITINATION\_PRC

FACE\_INTERACTIONS\_AT\_THE\_VASCULAR\_WALL;REACTOME\_COLLAGEN\_FORMATION;REAC

TION;REACTOME\_MEIOTIC\_RECOMBINATION;REACTOME\_HEMOSTASIS

RECEPTOR\_SIGNALING;REACTOME\_NUCLEAR\_SIGNALING\_BY\_ERBB4;REACTOME\_DIABETE  
INTERACTION\_BETWEEN\_L1\_AND\_ANKYRINS

RT;REACTOME\_TRANSMEMBRANE\_TRANSPORT\_OF\_SMALL\_MOLECULES

REACTOME\_ENERGY\_DEPENDENT\_REGULATION\_OF\_MTOR\_BY\_LKB1\_AMPK;REACTOME\_PKB\_M

REACTOME\_TRIGLYCERIDE\_BIOSYNTHESIS;REACTOME\_FATTY\_ACYL\_COA\_BIOSYNTHESIS;RE  
ACTOME\_TRIGLYCERIDE\_BIOSYNTHESIS;REACTOME\_FATTY\_ACYL\_COA\_BIOSYNTHESIS;RE

REACTOME\_SIGNALING\_BY\_GPCR;REACTOME\_CLASS\_B\_2\_SECRETIN\_FAMILY\_RECEPTORS;REACTO  
REPLICATION;REACTOME\_MITOTIC\_PROMETAPHASE

PROTEINS\_AND\_COMPLEXES;REACTOME\_LOSS\_OF\_NLP\_FROM\_MITOTIC\_CENTROSOMES;R  
GPROTEIN\_LIKE\_RECEPTORS;REACTOME\_GPCR\_DOWNSTREAM\_SIGNALING;REACTOME\_G\_ALPH

REACTOME\_REGULATION\_OF\_WATER\_BALANCE\_BY\_RENAL\_AQUAPORINS

REACTOME\_ION\_CHANNEL\_TRANSPORT

REACTOME\_CENTRON\_TRANSPORT;REACTOME\_CELL\_SURFACE\_INTERACTIONS\_AT\_THE\_VASCULAR\_WA

\_MRNA\_SPLICING

ENESIS;REACTOME\_REGULATORY\_RNA\_PATHWAYS;REACTOME\_PROCESSING\_OF\_CAPPE

EAM\_SIGNALING;REACTOME\_G\_ALPHA\_I\_SIGNALLING\_EVENTS;REACTOME\_GPCR\_LIGAND

CTOME\_ANTIGEN\_ACTIVATES\_B\_CELL\_RECEPTOR\_LEADING\_TO\_GENERATION\_OF\_SECON  
ALING\_IN\_EMT\_EPITHELIAL\_TO\_MESENCHYMAL\_TRANSITION;REACTOME\_NRAGE\_SIGNALS

TION\_OF\_TRANSCRIPTION\_COUPLED\_NER\_TC\_NER\_REPAIR\_COMPLEX;REACTOME\_DNA\_F  
TION\_OF\_TRANSCRIPTION\_COUPLED\_NER\_TC\_NER\_REPAIR\_COMPLEX;REACTOME\_DNA\_F

OME\_METABOLISM\_OF\_PROTEINS;REACTOME\_POST\_TRANSLATIONAL\_PROTEIN\_MODIFIC/  
OME\_METABOLISM\_OF\_PROTEINS;REACTOME\_POST\_TRANSLATIONAL\_PROTEIN\_MODIFIC/  
OME\_METABOLISM\_OF\_PROTEINS;REACTOME\_POST\_TRANSLATIONAL\_PROTEIN\_MODIFIC/

:GATIVE\_REGULATORS\_OF\_RIG\_I\_MDA5\_SIGNALING;REACTOME\_RIG\_I\_MDA5\_MEDIATED\_II



Ξ\_CLASS\_A1\_RHODOPSIN\_LIKE\_RECEPTORS;REACTOME\_G\_ALPHA\_Q\_SIGNALLING\_EVENT  
INTEGRIN\_CELL\_SURFACE\_INTERACTIONS;REACTOME\_INTERFERON\_GAMMA\_SIGNALING;  
\_SIGNALING;REACTOME\_INTERFERON\_SIGNALING;REACTOME\_IL\_6\_SIGNALING;REACTOME

RT;REACTOME\_LIPOPROTEIN\_METABOLISM;REACTOME\_CHYLOMICRON\_MEDIATED\_LIPID\_  
RT;REACTOME\_LIPOPROTEIN\_METABOLISM;REACTOME\_CHYLOMICRON\_MEDIATED\_LIPID\_  
/OSTASIS

VG\_BY\_ERBB2;REACTOME\_SIGNALING\_BY\_EGFR\_IN\_CANCER;REACTOME\_NGF\_SIGNALLING  
IGNALING

DOWNSTREAM\_SIGNALING;REACTOME\_G\_ALPHA\_S\_SIGNALLING\_EVENTS

\_GLUCOSE\_METABOLISM

\_MRNA\_SPLICING

\_MRNA\_SPLICING

NCHYMAL\_TRANSITION;REACTOME\_DOWNREGULATION\_OF\_TGF\_BETA\_RECEPTOR\_SIGNALING;  
\_GPCR;REACTOME\_G\_ALPHA1213\_SIGNALLING\_EVENTS;REACTOME\_GPCR\_DOWNSTREAM

\_CLASS\_A1\_RHODOPSIN\_LIKE\_RECEPTORS;REACTOME\_G\_ALPHA\_Q\_SIGNALLING\_EVENT

TRANSPORT;REACTOME\_TRANSPORT\_OF\_INORGANIC\_CATIONS\_ANIONS\_AND\_AMINO\_ACIDS

LIPID\_METABOLISM;REACTOME\_METABOLISM\_OF\_LIPIDS\_AND\_LIPOPROTEINS

\_MRNA\_SPLICING

\_MRNA\_SPLICING

ING;REACTOME\_SEMAPHORIN\_INTERACTIONS;REACTOME\_SEMA4D\_INDUCED\_CELL\_MIGRATION

REPLACEMENT\_PATHWAY;REACTOME\_CELL\_CYCLE;REACTOME\_PROCESSIVE\_SYNTHESIS

REPLACEMENT\_PATHWAY;REACTOME\_CELL\_CYCLE;REACTOME\_PROCESSIVE\_SYNTHESIS

REPLACEMENT\_PATHWAY;REACTOME\_CELL\_CYCLE;REACTOME\_PROCESSIVE\_SYNTHESIS

SMITTER\_RECEPTOR\_BINDING\_AND\_DOWNSTREAM\_TRANSMISSION\_IN\_THE\_POSTSYNAP

IMMUNE\_SYSTEM;REACTOME\_ADAPTIVE\_IMMUNE\_SYSTEM

ACTOME\_SIGNAL\_REGULATORY\_PROTEIN\_SIRP\_FAMILY\_INTERACTIONS;REACTOME\_HEMOS

.DING;REACTOME\_METABOLISM\_OF\_PROTEINS

NCAM\_SIGNALING\_FOR\_NEURITE\_OUT\_GROWTH

HYDROLYZED\_PROTEINS;REACTOME\_POST\_TRANSLATIONAL\_PROTEIN\_MODIFICATION

PROTEINS\_AND\_COMPLEXES;REACTOME\_LOSS\_OF\_NLP\_FROM\_MITOTIC\_CENTROSOMES;R

SMITTER\_RECEPTOR\_BINDING\_AND\_DOWNSTREAM\_TRANSMISSION\_IN\_THE\_POSTSYNAP

ACTOME\_ANTIVIRAL\_MECHANISM\_BY\_IFN\_STIMULATED\_GENES;REACTOME\_SIGNALING\_BY\_E

RANSPORT;REACTOME\_TRANSPORT\_OF\_INORGANIC\_CATIONS\_ANIONS\_AND\_AMINO\_ACID

RANSPORT;REACTOME\_TRANSPORT\_OF\_GLUCOSE\_AND\_OTHER\_SUGARS\_BILE\_SALTS\_AI

INELS

ES;REACTOME\_ION\_CHANNEL\_TRANSPORT

\_TRANSPORT\_OF\_SMALL\_MOLECULES;REACTOME\_GLUCAGON\_SIGNALING\_IN\_METABOLIC  
\_TRANSPORT\_OF\_SMALL\_MOLECULES;REACTOME\_GLUCAGON\_SIGNALING\_IN\_METABOLIC  
SIS

\_FORMATION;REACTOME\_SIGNALING\_BY\_PDGF;REACTOME\_AXON\_GUIDANCE;REACTOME\_  
\_FORMATION;REACTOME\_SIGNALING\_BY\_PDGF;REACTOME\_AXON\_GUIDANCE;REACTOME\_  
:ACTOME\_ACTIVATION\_OF\_CHAPERONE\_GENES\_BY\_XBP1S;REACTOME\_UNFOLDED\_PROT

CTIONS;REACTOME\_HEMOSTASIS

TRIN\_CREB\_SIGNALLING\_PATHWAY\_VIA\_PKC\_AND\_MAPK;REACTOME\_RESPONSE\_TO\_ELE

PI\_METABOLISM;REACTOME\_METABOLISM\_OF\_LIPIDS\_AND\_LIPOPROTEINS

ERON\_SIGNALING;REACTOME\_IMMUNE\_SYSTEM;REACTOME\_CYTOKINE\_SIGNALING\_IN\_IMI  
ROUGH\_JNK;REACTOME\_CELL\_DEATH\_SIGNALLING\_VIA\_NRAGE\_NRIF\_AND\_NADE;REACTO

SCRIPT\_TO\_CYTOPLASM;REACTOME\_RNA\_POL\_II\_TRANSCRIPTION;REACTOME\_MRNA\_PRO

CELL\_SURFACE\_INTERACTIONS\_AT\_THE\_VASCULAR\_WALL;REACTOME\_INTEGRIN\_CELL\_S  
\_FORMATION;REACTOME\_SIGNALING\_BY\_PDGF;REACTOME\_AXON\_GUIDANCE;REACTOME

ROTEINS\_AND\_COMPLEXES;REACTOME\_LOSS\_OF\_NLP\_FROM\_MITOTIC\_CENTROSOMES;R

\_METABOLISM;REACTOME\_METABOLISM\_OF\_LIPIDS\_AND\_LIPOPROTEINS

\_SIGNALING\_BY\_GPCR;REACTOME\_CLASS\_A1\_RHODOPSIN\_LIKE\_RECEPTORS;REACTOME  
SM

\_FROM\_CHROMATIN;REACTOME\_CELL\_CYCLE\_MITOTIC;REACTOME\_CELL\_CYCLE\_CHECKP  
G;REACTOME\_SEMAPHORIN\_INTERACTIONS;REACTOME\_SEMA4D\_INDUCED\_CELL\_MIGRA

G;REACTOME\_IL\_2\_SIGNALING;REACTOME\_IMMUNE\_SYSTEM;REACTOME\_CYTOKINE\_SIGN  
:MODELLING\_OF\_PE;REACTOME\_GLYCEROPHOSPHOLIPID\_BIOSYNTHESIS;REACTOME\_ME  
/OSTASIS

SMITTER\_RECEPTOR\_BINDING\_AND\_DOWNSTREAM\_TRANSMISSION\_IN\_THE\_POSTSYNAP  
SMITTER\_RECEPTOR\_BINDING\_AND\_DOWNSTREAM\_TRANSMISSION\_IN\_THE\_POSTSYNAP

NCAM\_SIGNALING\_FOR\_NEURITE\_OUT\_GROWTH  
NG;REACTOME\_REGULATORY\_RNA\_PATHWAYS;REACTOME\_SIGNALING\_BY\_NOTCH  
E\_PEPTIDE\_LIGAND\_BINDING\_RECEPTORS;REACTOME\_CLASS\_A1\_RHODOPSIN\_LIKE\_RECE  
TION;REACTOME\_TRANSCRIPTION;REACTOME\_RNA\_POL\_I\_RNA\_POL\_III\_AND\_MITOCHONC  
TION;REACTOME\_TRANSCRIPTION;REACTOME\_RNA\_POL\_I\_RNA\_POL\_III\_AND\_MITOCHONC  
:EPLICATION;REACTOME\_MITOTIC\_PROMETAPHASE

M\_OF\_LIPIDS\_AND\_LIPOPROTEINS

SIS

.YCOSPHINGOLIPID\_METABOLISM;REACTOME\_PHOSPHOLIPID\_METABOLISM;REACTOME\_T

Y\_ACID\_TRIACYLGLYCEROL\_AND\_KETONE\_BODY\_METABOLISM  
Y\_ACID\_TRIACYLGLYCEROL\_AND\_KETONE\_BODY\_METABOLISM

\_IFN\_ALPHA\_BETA\_PATHWAYS;REACTOME\_INNATE\_IMMUNE\_SYSTEM;REACTOME\_IMMUNE

\_APOPTOSIS;REACTOME\_CELL\_DEATH\_SIGNALLING\_VIA\_NRAGE\_NRIF\_AND\_NADE;REACTOM

A;REACTOME\_CELL\_CYCLE\_MITOTIC;REACTOME\_MRNA\_PROCESSING;REACTOME\_MRNA\_  
\_PROCESSING\_PRESENTATION;REACTOME\_ANTIGEN\_PROCESSING\_UBIQUITINATION\_PRC

ROUGH\_JNK;REACTOME\_CELL\_DEATH\_SIGNALLING\_VIA\_NRAGE\_NRIF\_AND\_NADE;REACTO

ANSRIPTION\_PATHWAY;REACTOME\_METABOLISM\_OF\_LIPIDS\_AND\_LIPOPOTEINS;REACT  
LY

.CTOME\_SIGNALING\_BY\_NOTCH  
\_GLUCOSE\_METABOLISM

:\_LIPIDS\_AND\_LIPOPROTEINS;REACTOME\_FATTY\_ACID\_TRIACYLGLYCEROL\_AND\_KETONE\_

ME\_HS\_GAG\_BIOSYNTHESIS;REACTOME\_HEPARAN\_SULFATE\_HEPARIN\_HS\_GAG\_METABO  
RANSPO

ES;REACTOME\_ION\_CHANNEL\_TRANSPORT

\_FATE\_DERMATAN\_SULFATE\_METABOLISM;REACTOME\_HEPARAN\_SULFATE\_HEPARIN\_HS\_  
:\_PLATELET\_CALCIIUM\_HOMEOSTASIS;REACTOME\_ION\_TRANSPORT\_BY\_P\_TYPE\_ATPASES  
EACTOME\_METABOLISM\_OF\_PROTEINS

OME\_BASIGIN\_INTERACTIONS;REACTOME\_AXON\_GUIDANCE;REACTOME\_L1CAM\_INTERAC  
OME\_BASIGIN\_INTERACTIONS;REACTOME\_AXON\_GUIDANCE;REACTOME\_L1CAM\_INTERAC

Ξ\_EXTENSION\_OF\_TELOMERES

MUNE\_SYSTEM;REACTOME\_CYTOKINE\_SIGNALING\_IN\_IMMUNE\_SYSTEM



'COSAMINOGLYCAN\_METABOLISM;REACTOME\_METABOLISM\_OF\_CARBOHYDRATES  
ROTEINS\_AND\_COMPLEXES;REACTOME\_LOSS\_OF\_NLP\_FROM\_MITOTIC\_CENTROSOMES;R

ME\_SIGNALING\_BY\_NOTCH2;REACTOME\_SIGNALING\_BY\_NOTCH1;REACTOME\_SIGNALING\_

CTOME\_MITOTIC\_M\_M\_G1\_PHASES;REACTOME\_FACTORS\_INVOLVED\_IN\_MEGAKARYOCYTI

UT\_GROWTH;REACTOME\_L1CAM\_INTERACTIONS;REACTOME\_INTERACTION\_BETWEEN\_L1.  
PSIN\_LIKE\_RECEPTORS;REACTOME\_GPCR\_LIGAND\_BINDING

BINDING

TOME\_BIOLOGICAL\_OXIDATIONS;REACTOME\_PHASE\_II\_CONJUGATION



DE\_STIMULATES\_GUANYLATE\_CYCLASE;REACTOME\_PLATELET\_HOMEOSTASIS;REACTOME

ME\_TETRAHYDROBIOPTERIN\_BH4\_SYNTHESIS\_RECYCLING\_SALVAGE\_AND\_REGULATION;

ATION\_DEPENDENT\_MRNA\_DECAY;REACTOME\_METABOLISM\_OF\_RNA  
MRNA\_SPLICING

M\_OF\_LIPIDS\_AND\_LIPOPROTEINS

YCOSPHINGOLIPID\_METABOLISM;REACTOME\_PHOSPHOLIPID\_METABOLISM;REACTOME\_T

ANCE;REACTOME\_L1CAM\_INTERACTIONS;REACTOME\_RECYCLING\_PATHWAY\_OF\_L1;REAC

SMITTER\_RECEPTOR\_BINDING\_AND\_DOWNSTREAM\_TRANSMISSION\_IN\_THE\_POSTSYNAP  
LLING\_COMPLEXES;REACTOME\_P75NTR\_SIGNALS\_VIA\_NFKB;REACTOME\_NFKB\_IS\_ACTIV/

ESSING\_CROSS\_PRESENTATION;REACTOME\_INTERFERON\_GAMMA\_SIGNALING;REACTOME

TOME\_NCAM\_SIGNALING\_FOR\_NEURITE\_OUT\_GROWTH;REACTOME\_L1CAM\_INTERACTION

JSULIN LIKE\_GROWTH\_FACTOR\_BINDING\_PROTEINS\_IGFBPS

INDING\_RECEPTORS;REACTOME\_GPCR\_DOWNSTREAM\_SIGNALING;REACTOME\_G\_ALPHA

CHONDRIAL\_TRANSCRIPTION;REACTOME\_RNA\_POL\_I\_TRANSCRIPTION\_INITIATION

\_OF\_LIPIDS\_AND\_LIOPROTEINS;REACTOME\_FATTY\_ACID\_TRIACYLGLYCEROL\_AND\_KETO

EACTOME\_TRANSMEMBRANE\_TRANSPORT\_OF\_SMALL\_MOLECULES

ROTEINS\_AND\_COMPLEXES;REACTOME\_LOSS\_OF\_NLP\_FROM\_MITOTIC\_CENTROSOMES;R  
L\_CELL\_COMMUNICATION;REACTOME\_INTEGRIN\_CELL\_SURFACE\_INTERACTIONS;REACTC  
6\_MEDIATED\_NFKB\_ACTIVATION;REACTOME\_RIG\_I\_MDA5\_MEDIATED\_INDUCION\_OF\_IFN\_

ACTOME\_SIGNALING\_BY\_FGFR\_IN\_DISEASE;REACTOME\_ACTIVATED\_POINT\_MUTANTS\_OF

:EACTOME\_NRAGE\_SIGNALS\_DEATH\_THROUGH\_JNK;REACTOME\_CELL\_DEATH\_SIGNALLIN  
RON\_SIGNALING;REACTOME\_IMMUNE\_SYSTEM;REACTOME\_CYTOKINE\_SIGNALING\_IN\_IMM  
ME\_CYCLIN\_E\_ASSOCIATED\_EVENTS\_DURING\_G1\_S\_TRANSITION\_;REACTOME\_G1\_PHASE;

RANSPORT;REACTOME\_TRANSPORT\_OF\_INORGANIC\_CATIONS\_ANIONS\_AND\_AMINO\_ACID

N\_OF\_ENERGY\_METABOLISM;REACTOME\_REGULATION\_OF\_INSULIN\_SECRETION  
IGNALING

ROTEINS\_AND\_COMPLEXES;REACTOME\_LOSS\_OF\_NLP\_FROM\_MITOTIC\_CENTROSOMES;R

RANSPORT;REACTOME\_TRANSPORT\_OF\_INORGANIC\_CATIONS\_ANIONS\_AND\_AMINO\_ACID

LLING\_COMPLEXES;REACTOME\_P75NTR\_SIGNALS\_VIA\_NFKB;REACTOME\_NFKB\_IS\_ACTIV/

CHONDRIAL\_TRANSCRIPTION;REACTOME\_RNA\_POL\_III\_TRANSCRIPTION\_INITIATION\_FROI

REACTOME\_NRAGE\_SIGNALS\_DEATH\_THROUGH\_JNK;REACTOME\_CELL\_DEATH\_SIGNALLIN

JUNCTION\_ORGANIZATION;REACTOME\_CELL\_JUNCTION\_ORGANIZATION

REACTOME\_SIGNALLING\_TO\_ERKS;REACTOME\_SIGNALLING\_TO\_P38\_VIA\_RIT\_AND\_RIN

REACTOME\_TRANSPORT\_OF\_INORGANIC\_CATIONS\_ANIONS\_AND\_AMINO\_ACID

REACTOME\_SRP\_DEPENDENT\_COTRANSLATIONAL\_PROTEIN\_TARGETING\_TO\_MEMBRANES;  
REACTOME\_ION\_CHANNEL\_TRANSPORT;  
REACTOME\_PROTEINS\_MEDIATED\_TRANSPORT;  
REACTOME\_TRANSMEMBRANE\_TRANSPORT\_OF\_SMALL\_MOLECULES;  
REACTOME\_LIGAND\_GATED\_ION\_CHANNEL\_TRANSPORT

REACTOME\_HEMOSTASIS;REACTOME\_PLATELET\_ACTIVATION\_SIGNALING\_AND\_AGGREGATION

REACTOME\_LIPIDS\_AND\_LIPOPROTEINS;REACTOME\_FATTY\_ACID\_TRIACYLGLYCEROL\_AND\_KETONE\_BODIES

REACTOME\_ROLE\_OF\_DCC\_IN\_REGULATING\_APOPTOSIS;REACTOME\_NETRIN1\_SIGNALING;REACTOME\_NG2

REACTOME\_MER\_PHAGOSOME\_PATHWAY;REACTOME\_IMMUNOREGULATORY\_INTERACTIONS\_BETWEEN\_T\_LYMPHOCYTES

REACTOME\_METABOLISM;REACTOME\_METABOLISM\_OF\_LIPIDS\_AND\_LIPOPROTEINS

ARGINE\_N\_LINKED\_GLYCOSYLATION;REACTOME\_CALNEXIN\_CALRETICULIN\_CYCLE;REACTOME\_PEPTIDE\_LIGAND\_BINDING\_RECEPTORS;REACTOME\_CLASS\_A1\_RHODOPSIN\_LIKE

I\_CHANNELS

INSULIN\_SECRETION;REACTOME\_POTASSIUM\_CHANNELS;REACTOME\_INWARDLY\_RECTIFYING\_CHANNELS

ME\_SIGNALING\_BY\_NOTCH

PI\_METABOLISM;REACTOME\_METABOLISM\_OF\_LIPIDS\_AND\_LIPOPROTEINS

PID\_METABOLISM;REACTOME\_METABOLISM\_OF\_LIPIDS\_AND\_LIPOPROTEINS

ME\_CELL\_CYCLE\_MITOTIC;REACTOME\_COSTIMULATION\_BY\_THE\_CD28\_FAMILY;REACTOME\_CELL\_CYCLE\_G1\_S\_G2\_M

GENESIS;REACTOME\_METABOLISM\_OF\_CARBOHYDRATES;REACTOME\_HEMOSTASIS;REACTOME\_CELL\_CYCLE\_G1\_S\_G2\_M



\_MRNA\_SPLICING;REACTOME\_MRNA\_SPLICING\_MINOR\_PATHWAY

SMITTER\_RECEPTOR\_BINDING\_AND\_DOWNSTREAM\_TRANSMISSION\_IN\_THE\_POSTSYNAP

USE\_II\_CONJUGATION

SMITTER\_RECEPTOR\_BINDING\_AND\_DOWNSTREAM\_TRANSMISSION\_IN\_THE\_POSTSYNAP

BY\_GPCR;REACTOME\_OPIOID\_SIGNALLING;REACTOME\_ADENYLATE\_CYCLASE\_INHIBITORY

I;REACTOME\_CYTOKINE\_SIGNALING\_IN\_IMMUNE\_SYSTEM

ORT;REACTOME\_RESPIRATORY\_ELECTRON\_TRANSPORT\_ATP\_SYNTHESIS\_BY\_CHEMIOSM

\_MITOTIC\_SPINDLE\_CHECKPOINT\_COMPONENTS;REACTOME\_CELL\_CYCLE;REACTOME\_CE

RANSPORT;REACTOME\_TRANSPORT\_OF\_INORGANIC\_CATIONS\_ANIONS\_AND\_AMINO\_ACID

BY\_ERBB4;REACTOME\_PROLACTIN\_RECEPTOR\_SIGNALING;REACTOME\_NUCLEAR\_SIGNALING;  
REACTOME\_GLYCOSAMINOGLYCAN\_METABOLISM;REACTOME\_METABOLISM\_OF\_CARBOHYDRATES

REACTOME\_DOWNSTREAM\_TCR\_SIGNALING;REACTOME\_P75NTR\_RECRUITS\_SIGNALLING\_COMPLEX

REACTOME\_GLYCEROPHOSPHOLIPID\_BIOSYNTHESIS;REACTOME\_METABOLISM\_OF\_LIPIDS

REACTOME\_GPCR\_LIGAND\_BINDING;REACTOME\_G\_ALPHA\_I\_SIGNALLING\_EVENTS;REACTOME\_GPCR\_LIGAND\_BINDING;  
REACTOME\_HEPARAN\_SULFATE\_HEPARIN\_HS\_GAG\_METABOLISM

.L\_JUNCTION\_ORGANIZATION

K\_VESICLE\_BUDDING;REACTOME\_SYNTHESIS\_OF\_PIPS\_AT\_THE\_GOLGI\_MEMBRANE;REAC  
ING\_CASCADE;REACTOME\_INTRINSIC\_PATHWAY;REACTOME\_HEMOSTASIS;REACTOME\_PL

1METABOLISM;REACTOME\_METABOLISM\_OF\_LIPIDS\_AND\_LIPOPROTEINS

G\_COMPLEXES;REACTOME\_P75NTR\_SIGNALS\_VIA\_NFKB;REACTOME\_P75\_NTR\_RECEPTOF

RT;REACTOME\_LIPOPROTEIN\_METABOLISM

\_OF\_SMALL\_MOLECULES;REACTOME\_SLC\_MEDIATED\_TRANSMEMBRANE\_TRANSPORT;RE.

OME\_METABOLISM\_OF\_PROTEINS;REACTOME\_POST\_TRANSLATIONAL\_PROTEIN\_MODIFIC/

SIS

NOTCH\_EXPRESSION\_AND\_PROCESSING;REACTOME\_PRE\_NOTCH\_PROCESSING\_IN\_GOLGI

STEM;REACTOME\_COMPLEMENT\_CASCADE

ISM\_OF\_VITAMINS\_AND\_COFACTORS;REACTOME\_CELL\_CYCLE;REACTOME\_ENOS\_ACTIVATION

SMITTER\_RECEPTOR\_BINDING\_AND\_DOWNSTREAM\_TRANSMISSION\_IN\_THE\_POSTSYNAPTIC

THESIS;REACTOME\_TRANSMEMBRANE\_TRANSPORT\_OF\_SMALL\_MOLECULES;REACTOME\_LIPID\_METABOLISM;  
FATTY\_ACID\_TRIACYLGLYCEROL\_AND\_KETONE\_BODY\_METABOLISM

ION;REACTOME\_RNA\_POL\_III\_TRANSCRIPTION;REACTOME\_RNA\_POL\_II\_TRANSCRIPTION

ION\_SIGNALING\_BY\_THE\_B\_CELL\_RECEPTOR\_BCR;REACTOME\_IMMUNE\_SYSTEM;REACTOME

REACTOME\_METABOLISM\_OF\_PROTEINS;REACTOME\_RESPIRATORY\_ELECTRON\_TRANSPORT;  
MITOCHONDRIAL\_INTEGRATION\_OF\_ENERGY\_METABOLISM;REACTOME\_G\_ALPHA\_Q\_SIGNALLING\_EVENTS

THEISIS\_OF\_SUBSTRATES\_IN\_N\_GLYCAN\_BIOSYTHESIS;REACTOME\_ASPARAGINE\_N\_LINKED

PROTEIN\_LIKE\_RECEPTORS;REACTOME\_CHEMOKINE\_RECEPTORS\_BIND\_CHEMOKINES;REACTOME

REACTOME\_MEMBRANE\_TRAFFICKING;REACTOME\_TRANS\_GOLGI\_NETWORK\_VESICLE\_BUFFERING

M\_OF\_PROTEINS

SMITTER\_RECEPTOR\_BINDING\_AND\_DOWNSTREAM\_TRANSMISSION\_IN\_THE\_POSTSYNAPTIC

REACTOME\_SIGNALING\_BY\_NOTCH

RANSPORT;REACTOME\_TRANSPORT\_OF\_INORGANIC\_CATIONS\_ANIONS\_AND\_AMINO\_ACID

HEPARAN\_SULFATE\_METABOLISM;REACTOME\_HS\_GAG\_BIOSYNTHESIS;REACTOME\_HEPARA

CTION\_OF\_TRANSCRIPTION\_COUPLED\_NER\_TC\_NER\_REPAIR\_COMPLEX;REACTOME\_DNA\_F

RANSPORT;REACTOME\_TRANSPORT\_OF\_VITAMINS\_NUCLEOSIDES\_AND\_RELATED\_MOLEC

IC\_MEDIATED\_ATTRACTIVE\_SIGNALING

MEALER\_PHAGOSOME\_PATHWAY;REACTOME\_IMMUNOREGULATORY\_INTERACTIONS\_BETWE

REACTOME\_TRANSMEMBRANE\_TRANSPORT\_OF\_SMALL\_MOLECULES

EG\_ALPHA\_Q\_SIGNALLING\_EVENTS;REACTOME\_GPCR\_DOWNSTREAM\_SIGNALING;REACT

EG\_ALPHA\_Q\_SIGNALLING\_EVENTS;REACTOME\_GPCR\_DOWNSTREAM\_SIGNALING;REACT

IGNALING

GOLOGI\_MEMBRANE;REACTOME\_PHOSPHOLIPID\_METABOLISM;REACTOME\_SYNTHESIS\_OF\_PLASMA\_MEMBRANE;  
CELL\_JUNCTION\_ORGANIZATION;  
REACTOME\_CELL\_CYCLE\_CHECKPOINTS;REACTOME\_HOMOLOGOUS\_RECOMBINATION\_REPAIR;  
REACTOME\_DNA\_DAMAGE\_RESPONSE

REACTOME\_SIGNALING\_BY\_ERBB4;REACTOME\_SIGNALING\_BY\_ERBB2;REACTOME\_SIGNALING\_BY\_ERBB3;  
REACTOME\_PLATELET\_PRODUCTION;REACTOME\_KINESINS;REACTOME\_HEMOSTASIS;  
REACTOME\_INSULIN\_SECRETION\_BY\_GLCAGON\_LIKE\_PEPTIDE1;REACTOME\_REGULATION\_OF\_INSULIN\_SECRETION

REACTOME\_NEUROTRANSMITTER\_RECEPTOR\_BINDING\_AND\_DOWNSTREAM\_TRANSMISSION\_IN\_THE\_POSTSYNAPTIC\_TERMINAL

REACTOME\_SIGNALING\_BY\_THE\_B\_CELL\_RECEPTOR\_BCR;REACTOME\_GPVI\_MEDIATED\_ACTIVATION\_OF\_THE\_B\_CELL

HEMOSTASIS

REACTOME\_NEUROTRANSMITTER\_RELEASE\_CYCLE;REACTOME\_DOPAMINE\_NEUROTRANSMITTER\_RELEASE\_CYCLE



REACTOME\_GPCR\_LIGAND\_BINDING

REACTOME\_MYCOBACTERIUM\_TUBERCULOSIS;REACTOME\_IMMUNE\_SYSTEM;REACTOME\_ADAPTIVE  
IMMUNITY

REACTOME\_TRANSLATIONAL\_PROTEIN\_MODIFICATION

REACTOME\_SPHINGOLIPID\_METABOLISM;REACTOME\_PHOSPHOLIPID\_METABOLISM;REACTOME\_T

REACTOME\_CELL\_DIVISION

REACTOME\_TRANSLATIONAL\_PROTEIN\_MODIFICATION

REACTOME\_CELL\_CELL\_CONTACT\_MEDIATED\_ATTRACTIVE\_SIGNALING

ACTOME\_PROCESSING\_OF\_CAPPED\_INTRON\_CONTAINING\_PRE\_MRNA;REACTOME\_TRAN

RIUM\_TUBERCULOSIS;REACTOME\_TRANSMEMBRANE\_TRANSPORT\_OF\_SMALL\_MOLECULE

OME\_NUCLEOTIDE\_BINDING\_DOMAIN\_LEUCINE\_RICH\_REPEAT\_CONTAINING\_RECEPTOR\_I

;ENCHYMAL\_TRANSITION;REACTOME\_CELL\_CELL\_JUNCTION\_ORGANIZATION;REACTOME\_

;C\_MEDIATED\_ATTRACTIVE\_SIGNALING;REACTOME\_FACTORS\_INVOLVED\_IN\_MEGAKARYO

\_FORMATION;REACTOME\_INTEGRIN\_CELL\_SURFACE\_INTERACTIONS;REACTOME\_SIGNALIN

\_OF\_LIPIDS\_AND\_LIOPROTEINS;REACTOME\_FATTY\_ACID\_TRIACYLGLYCEROL\_AND\_KETO  
TION\_OF\_GENE\_EXPRESSION\_IN\_BETA\_CELLS  
MOSTASIS

ALING\_BY\_HIPPO;REACTOME\_APOPTOTIC\_CLEAVAGE\_OF\_CELL\_ADHESION\_PROTEINS;RE  
SMITTER\_RECEPTOR\_BINDING\_AND\_DOWNSTREAM\_TRANSMISSION\_IN\_THE\_POSTSYNAP

CTION\_ORGANIZATION

TOME\_ENERGY\_DEPENDENT\_REGULATION\_OF\_MTOR\_BY\_LKB1\_AMPK;REACTOME\_PKB\_M  
OF\_LIPIDS\_AND\_LIPOPROTEINS;REACTOME\_LIPID\_DIGESTION\_MOBILIZATION\_AND\_TRANSF

SLATIONAL\_PROTEIN\_MODIFICATION

SLATIONAL\_PROTEIN\_MODIFICATION

EACTOME\_SYNTHESIS\_OF\_PC;REACTOME\_GLYCEROPHOSPHOLIPID\_BIOSYNTHESIS;REAC

ROUGH\_JNK;REACTOME\_CELL\_DEATH\_SIGNALLING\_VIA\_NRAGE\_NRIF\_AND\_NADE;REACTO

\_ACTIVATES\_SMADS;REACTOME\_SIGNALING\_BY\_TGF\_BETA\_RECEPTOR\_COMPLEX

.GLUCOSE\_METABOLISM

ROTEINS\_AND\_COMPLEXES;REACTOME\_LOSS\_OF\_NLP\_FROM\_MITOTIC\_CENTROSOMES;R

OTIDE\_BINDING\_DOMAIN\_LEUCINE\_RICH\_REPEAT\_CONTAINING\_RECEPTOR\_NLR\_SIGNALING

NERATION\_OF\_SECOND\_MESSENGER\_MOLECULES;REACTOME\_IMMUNE\_SYSTEM;REACTOME

MENT\_AND\_PLATELET\_PRODUCTION;REACTOME\_KINESINS;REACTOME\_HEMOSTASIS;REACTOME\_TREASURER\_SIGNALING;REACTOME\_G\_ALPHA\_S\_SIGNALLING\_EVENTS;REACTOME\_GPCR\_LIGANDS

REACTOME\_PEPTIDE\_CHAIN\_ELONGATION;REACTOME\_METABOLISM\_OF\_PROTEINS;REACTOME

REACTOME\_SIGNALING\_BY\_ERBB4;REACTOME\_SIGNALING\_BY\_ERBB2;REACTOME\_SIGNALING\_BY\_ERBB3

REACTOME\_ION\_CHANNEL\_TRANSPORT  
REACTOME\_ION\_CHANNEL\_TRANSPORT

REACTOME\_SIGNALING\_BY\_FGFR\_IN\_DISEASE;REACTOME\_ACTIVATED\_POINT\_MUTANTS\_OF

REACTOME\_OPIOID\_SIGNALLING;REACTOME\_G\_PROTEIN\_ACTIVATION;REACTOME\_CELL\_DEATH\_BY\_APOPTOSIS;REACTOME\_NF\_KB\_SIGNALS\_DEATH\_THROUGH\_JNK;REACTOME\_CELL\_DEATH\_BY\_APOPTOSIS

REACTOME\_METABOLISM\_OF\_PROTEINS;REACTOME\_POST\_TRANSLATIONAL\_PROTEIN\_MODIFICATION

HOST\_INTERACTIONS\_OF\_HIV\_FACTORS;REACTOME\_INTERACTIONS\_OF\_VPR\_WITH\_HOST

INTERACTIONS\_BETWEEN\_A\_LYMPHOID\_AND\_A\_NON\_LYMPHOID\_CELL;REACTOME\_CELL\_

OME\_METABOLISM\_OF\_PROTEINS;REACTOME\_POST\_TRANSLATIONAL\_PROTEIN\_MODIFICA

EINS\_MEDIATED\_TRANSPORT;REACTOME\_TRANSMEMBRANE\_TRANSPORT\_OF\_SMALL\_MO  
CTRON\_TRANSPORT;REACTOME\_PYRUVATE\_METABOLISM

'STEM

RANSPORT;REACTOME\_TRANSPORT\_OF\_INORGANIC\_CATIONS\_ANIONS\_AND\_AMINO\_ACID

\_PROCESSING\_PRESENTATION;REACTOME\_ANTIGEN\_PROCESSING\_UBIQUITINATION\_PRC

\_MITOTIC\_SPINDLE\_CHECKPOINT\_COMPONENTS;REACTOME\_CELL\_CYCLE;REACTOME\_CE

EM\_HEMOSTASIS  
FUNCTIONS;REACTOME\_HEMOSTASIS  
TRANSPORT;REACTOME\_TRANSPORT\_OF\_INORGANIC\_CATIONS\_ANIONS\_AND\_AMINO\_ACID

PEPTIDE\_LIGAND\_RECEPTORS;REACTOME\_GPCR\_DOWNSTREAM\_SIGNALING;REACTOME\_G\_ALPHA

TRANSPORT;REACTOME\_TRANSMEMBRANE\_TRANSPORT\_OF\_SMALL\_MOLECULES  
TRANSPORT\_OF\_PROTEINS

TRANSPORT;REACTOME\_TRANSPORT\_OF\_GLUCOSE\_AND\_OTHER\_SUGARS\_BILE\_SALTS\_AID

TRANSPORT;REACTOME\_TRANSMEMBRANE\_TRANSPORT\_OF\_SMALL\_MOLECULES

BINDING

EM\_PEPTIDE\_LIGAND\_BINDING\_RECEPTORS;REACTOME\_CLASS\_A1\_RHODOPSIN\_LIKE\_RECE  
PTOR\_SIGNALING\_FOR\_NEURITE\_OUT\_GROWTH  
CALYPTER\_SYNAPSES;REACTOME\_NEURONAL\_SYSTEM;REACTOME\_SIGNALING\_BY\_GPCR;REACT  
OME\_HEMOSTASIS

CELLULAR\_FORMATION;REACTOME\_SIGNALING\_BY\_PDGF;REACTOME\_AXON\_GUIDANCE;REACTOME

CELLULAR\_SIGNALING\_COMPLEXES;REACTOME\_P75NTR\_SIGNALS\_VIA\_NFKB;REACTOME\_NFKB\_IS\_ACTIVATED

LY  
DME\_PRE\_NOTCH\_EXPRESSION\_AND\_PROCESSING;REACTOME\_PRE\_NOTCH\_PROCESSIN

\_BY\_ILS;REACTOME\_IL\_3\_5\_AND\_GM\_CSF\_SIGNALING;REACTOME\_IL\_RECEPTOR\_SHC\_SIG

ROUGH\_JNK;REACTOME\_CELL\_DEATH\_SIGNALLING\_VIA\_NRAGE\_NRIF\_AND\_NADE;REACTO

TOME\_METABOLISM\_OF\_LIPIDS\_AND\_LIPOPROTEINS

ROTEINS\_MEDIATED\_TRANSPORT;REACTOME\_TRANSMEMBRANE\_TRANSPORT\_OF\_SMALL\_  
MEOSTASIS;REACTOME\_HEMOSTASIS  
SOCIATED\_VESICLE\_BIOGENESIS

PSIN\_LIKE\_RECEPTORS;REACTOME\_GPCR\_DOWNSTREAM\_SIGNALING;REACTOME\_G\_ALPHA

S;REACTOME\_SEMAPHORIN\_INTERACTIONS  
EMICAL\_SYNAPSES;REACTOME\_NRAGE\_SIGNALS\_DEATH\_THROUGH\_JNK;REACTOME\_NEU  
HOSPHORYLATION\_CASCADE;REACTOME\_APOPTOSIS;REACTOME\_APOPTOTIC\_EXECUTIO

:NTIATION

NTHESES\_ON\_THE\_LAGGING\_STRAND;REACTOME\_CELL\_CYCLE\_MITOTIC;REACTOME\_M\_G

CTOME\_SEMA3A\_PAK\_DEPENDENT\_AXON\_REPULSION;REACTOME\_SEMAPHORIN\_INTERA

CHONDRIAL\_TRANSCRIPTION;REACTOME\_RNA\_POL\_III\_TRANSCRIPTION\_TERMINATION

IGNALING

ME\_FATTY\_ACID\_TRIACYLGLYCEROL\_AND\_KETONE\_BODY\_METABOLISM

SLATIONAL\_PROTEIN\_MODIFICATION

\_SIGNALING\_BY\_EGFR\_IN\_CANCER;REACTOME\_ANTIGEN\_ACTIVATES\_B\_CELL\_RECEPTOR

CRETIN\_SYNTHESIS\_SECRETION\_AND\_INACTIVATION;REACTOME\_SYNTHESIS\_SECRETIO

RF1;REACTOME\_REGULATION\_OF\_MRNA\_STABILITY\_BY\_PROTEINS\_THAT\_BIND\_AU\_RICH\_

NCAM\_SIGNALING\_FOR\_NEURITE\_OUT\_GROWTH

.INE\_HYDROXYLATION\_OF\_HYPOXIA\_INDUCIBLE\_FACTOR\_ALPHA

MPLEX;REACTOME\_ACTIVATION\_OF\_THE\_MRNA\_UPON\_BINDING\_OF\_THE\_CAP\_BINDING\_C

ING\_CASCADE;REACTOME\_INTRINSIC\_PATHWAY;REACTOME\_HEMOSTASIS;REACTOME\_PL



ENTS;REACTOME\_HIV\_INFECTION;REACTOME\_HIV\_LIFE\_CYCLE;REACTOME\_LATE\_PHASE\_

ROTEINS

V\_TYPE\_3\_PROMOTER

3SEQUENT\_MODIFICATION;REACTOME\_N\_GLYCAN\_ANTENNAE\_ELONGATION;REACTOME\_N

ND\_BINDING

PTCH1\_INTRACELLULAR\_DOMAIN\_REGULATES\_TRANSCRIPTION;REACTOME\_SIGNALING\_B'

SPORT\_OF\_MATURE\_TRANSCRIPT\_TO\_CYTOPLASM;REACTOME\_TRANSMEMBRANE\_TRANS

PLASMA\_MEMBRANE;REACTOME\_SIGNALING\_BY\_FGFR\_IN\_DISEASE;REACTOME\_TRANSMI  
SIGNALING;REACTOME\_NEGATIVE\_REGULATION\_OF\_FGFR\_SIGNALING;REACTOME\_CELL\_

ND\_ORGANIC\_ACIDS\_METAL\_IONS\_AND\_AMINE\_COMPOUNDS;REACTOME\_FACILITATIVE\_N

OMPLEX\_AND\_EIFS\_AND\_SUBSEQUENT\_BINDING\_TO\_43S;REACTOME\_METABOLISM\_OF\_PI

⋮

XES;REACTOME\_REGULATED\_PROTEOLYSIS\_OF\_P75NTR;REACTOME\_P75NTR\_SIGNALS\_V

PORT\_OF\_SMALL\_MOLECULES;REACTOME\_SLC\_MEDIATED\_TRANSMEMBRANE\_TRANSPOR

ARBOHYDRATES



EACTOME\_RECRUITMENT\_OF\_NUMA\_TO\_MITOTIC\_CENTROSOMES;REACTOME\_MITOTIC\_C

PLASMA\_MEMBRANE;REACTOME\_SIGNALING\_BY\_FGFR\_IN\_DISEASE;REACTOME\_SIGNALIN

REACTOME\_MRNA\_SPLICING;REACTOME\_PROCESSING\_OF\_CAPPED\_INTRONLESS\_PRE\_MRNA

REACTOME\_P75\_NTR\_RECEPTOR\_MEDIATED\_SIGNALLING;REACTOME\_SIGNALING\_BY\_GPCR;REACTOME

REACTOME\_EVENTS\_IN\_ERBB4\_SIGNALING;REACTOME\_PI3K\_EVENTS\_IN\_ERBB2\_SIGNALING;REACTOME\_EVENTS\_IN\_ERBB4\_SIGNALING;REACTOME\_PI3K\_EVENTS\_IN\_ERBB2\_SIGNALING;REACTOME

REACTOME\_REPLICATIVE\_COMPLEX;REACTOME\_E2F\_ENABLED\_INHIBITION\_OF\_PRE\_REPLICATION\_COMPLEX

I\_EXPRESSION;REACTOME\_YAP1\_AND\_WWTR1\_TAZ\_STIMULATED\_GENE\_EXPRESSION;RE

IG\_BY\_PDGF;REACTOME\_AXON\_GUIDANCE;REACTOME\_NCAM1\_INTERACTIONS;REACTOMI  
ME\_P75\_NTR\_RECEPTOR\_MEDIATED\_SIGNALLING;REACTOME\_SIGNALING\_BY\_GPCR;REAC

BY\_CONSTITUTIVELY\_ACTIVE\_EGFR;REACTOME\_SIGNALING\_BY\_EGFR\_IN\_CANCER;REACTO



:S;REACTOME\_THE\_ROLE\_OF\_NEF\_IN\_HIV1\_REPLICATION\_AND\_DISEASE\_PATHOGENESIS  
ME\_SIGNALING\_BY\_NOTCH1;REACTOME\_GENERIC\_TRANSCRIPTION\_PATHWAY;REACTOMI

)S\_OLIGOPEPTIDES

:\_HIV\_INFECTION;REACTOME\_HIV\_LIFE\_CYCLE;REACTOME\_LATE\_PHASE\_OF\_HIV\_LIFE\_CY

)S\_OLIGOPEPTIDES

PROTEINS;REACTOME\_LIPID\_DIGESTION\_MOBILIZATION\_AND\_TRANSPORT;REACTOME\_LI

ATION  
ATION

REGATION

ACTOME\_IMMUNE\_SYSTEM;REACTOME\_ADAPTIVE\_IMMUNE\_SYSTEM

HEMOSTASIS

\_SMAD3\_SMAD4\_HETEROTRIMER;REACTOME\_DOWNREGULATION\_OF\_SMAD2\_3\_SMAD4\_T  
PHORYLATION\_AND\_ACTIVATION\_OF\_IKKS\_COMPLEX;REACTOME\_TRAF6\_MEDIATED\_NFKB

PROTEASOME\_DEGRADATION

OS\_OLIGOPEPTIDES

ULES;REACTOME\_TRANSPORT\_OF\_ORGANIC\_ANIONS

LE;REACTOME\_TRANSMEMBRANE\_TRANSPORT\_OF\_SMALL\_MOLECULES;REACTOME\_SLC.

1A\_I\_SIGNALLING\_EVENTS;REACTOME\_GPCR\_LIGAND\_BINDING

REACTOME\_FATTY\_ACID\_TRIACYLGLYCEROL\_AND\_KETONE\_BODY\_METABOLISM;REACTOME\_TR

REACTOME\_PHOSPHOLIPID\_METABOLISM;REACTOME\_PI\_METABOLISM;REACTOME\_GOLGI\_ASS

PROTEASOME\_DEGRADATION

REACTOME\_G\_ALPHA\_Q\_SIGNALLING\_EVENTS;REACTOME\_GPCR\_DOWNSTREAM\_SIGNALING;F

SIGNALING\_BY\_CONSTITUTIVELY\_ACTIVE\_EGFR;REACTOME\_SIGNALING\_BY\_EGFR\_IN\_CANCER;REACTO  
SIGNALING\_BY\_CONSTITUTIVELY\_ACTIVE\_EGFR;REACTOME\_SIGNALING\_BY\_EGFR\_IN\_CANCER;REACTO

:PTORS;REACTOME\_G\_ALPHA\_Q\_SIGNALLING\_EVENTS;REACTOME\_GPCR\_DOWNSTREAM\_

EN\_A\_LYMPHOID\_AND\_A\_NON\_LYMPHOID\_CELL;REACTOME\_INTERFERON\_GAMMA\_SIGNA

RT\_OF\_SMALL\_MOLECULES;REACTOME\_SLC\_MEDIATED\_TRANSMEMBRANE\_TRANSPORT;R

ALLING;REACTOME\_ADENYLATE\_CYCLASE\_INHIBITORY\_PATHWAY;REACTOME\_NEUROTRA

OMPLEX;REACTOME\_PYRUVATE\_METABOLISM

DS\_OLIGOPEPTIDES

\_VOLTAGE\_GATED\_POTASSIUM\_CHANNELS;REACTOME\_POTASSIUM\_CHANNELS

RULES

GUIDANCE;REACTOME\_NCAM1\_INTERACTIONS;REACTOME\_REGULATION\_OF\_INSULIN\_SEC

ATION\_SIGNALING\_AND\_AGGREGATION

\_CONSTITUTIVELY\_ACTIVE\_EGFR;REACTOME\_GRB2\_EVENTS\_IN\_ERBB2\_SIGNALING;REAC  
\_LEADING\_TO\_GENERATION\_OF\_SECOND\_MESSENGERS;REACTOME\_SIGNALING\_BY\_THE



TIC\_CELL;REACTOME\_ACETYLCHOLINE\_BINDING\_AND\_DOWNSTREAM\_EVENTS;REACTOME

OMPLEX;REACTOME\_PYRUVATE\_METABOLISM

3OLIC\_REGULATION;REACTOME\_G\_ALPHA\_Q\_SIGNALLING\_EVENTS;REACTOME\_CLASS\_B\_  
ACTOME\_INTEGRATION\_OF\_ENERGY\_METABOLISM;REACTOME\_METABOLISM\_OF\_LIPIDS\_

F\_MRNA;REACTOME\_METABOLISM\_OF\_RNA;REACTOME\_REGULATION\_OF\_MRNA\_STABILIT  
REPAIR

\_AND\_ANKYRINS  
F\_MRNA;REACTOME\_MRNA\_DECAY\_BY\_3\_TO\_5\_EXORIBONUCLEASE;REACTOME\_DEADEN'  
PHOSPHOLIPID\_BIOSYNTHESIS;REACTOME\_METABOLISM\_OF\_LIPIDS\_AND\_LIPOPROTEINS

PLASMA\_MEMBRANE;REACTOME\_SIGNALING\_BY\_FGFR\_IN\_DISEASE;REACTOME\_RESPONS

OINTS;REACTOME\_M\_G1\_TRANSITION;REACTOME\_G1\_S\_TRANSITION;REACTOME\_SYNTHE

ME\_P75\_NTR\_RECEPTOR\_MEDIATED\_SIGNALLING;REACTOME\_SIGNALING\_BY\_GPCR;REAC

PROTEASOME\_DEGRADATION

IFN\_GAMMA\_SIGNALING;REACTOME\_IMMUNE\_SYSTEM;REACTOME\_ADAPTIVE\_IMMUNE\_

ME\_P75\_NTR\_RECEPTOR\_MEDIATED\_SIGNALLING;REACTOME\_SIGNALING\_BY\_GPCR;REAC

ME\_P75\_NTR\_RECEPTOR\_MEDIATED\_SIGNALLING;REACTOME\_SIGNALING\_BY\_GPCR;REAC

CTOME\_RNA\_POL\_I\_TRANSCRIPTION\_INITIATION

ACTOME\_TRANSPORT\_OF\_INORGANIC\_CATIONS\_ANIONS\_AND\_AMINO\_ACIDS\_OLIGOPEPT  
ACTOME\_TRANSPORT\_OF\_INORGANIC\_CATIONS\_ANIONS\_AND\_AMINO\_ACIDS\_OLIGOPEPT

IS\_OLIGOPEPTIDES

CTOME\_RNA\_POL\_I\_TRANSCRIPTION\_INITIATION

ORIAL\_TRANSCRIPTION

E\_TOLL\_RECEPTOR\_CASCADES

\_THE\_SINGLE\_NUCLEOTIDE\_REPLACEMENT\_PATHWAY;REACTOME\_DNA\_REPAIR;REACTOM  
\_THE\_SINGLE\_NUCLEOTIDE\_REPLACEMENT\_PATHWAY;REACTOME\_DNA\_REPAIR;REACTOM

NA\_REPAIR;REACTOME\_CHROMOSOME\_MAINTENANCE;REACTOME\_ACTIVATION\_OF\_ATR\_  
:AM\_SIGNALING;REACTOME\_G\_ALPHA\_I\_SIGNALLING\_EVENTS;REACTOME\_SIGNAL\_AMPLIF

ETABOLISM;REACTOME\_TRANSMEMBRANE\_TRANSPORT\_OF\_SMALL\_MOLECULES;REACTO

DE\_EXCISION\_REPAIR;REACTOME\_REPAIR\_SYNTHESIS\_FOR\_GAP\_FILLING\_BY\_DNA\_POL\_I

OS\_OLIGOPEPTIDES

I\_EXPRESSION;REACTOME\_CIRCADIAN\_REPRESSION\_OF\_EXPRESSION\_BY\_REV\_ERBA;RE/

.SYSTEM;REACTOME\_CYTOKINE\_SIGNALING\_IN\_IMMUNE\_SYSTEM

.NER\_TC\_NER;REACTOME\_RNA\_POL\_II\_TRANSCRIPTION\_PRE\_INITIATION\_AND\_PROMOTE

\_METABOLISM;REACTOME\_CHONDROITIN\_SULFATE\_DERMATAN\_SULFATE\_METABOLISM;F  
\_METABOLISM;REACTOME\_CHONDROITIN\_SULFATE\_DERMATAN\_SULFATE\_METABOLISM;F  
S;REACTOME\_ALPHA\_LINOLENIC\_ACID\_ALA\_METABOLISM;REACTOME\_PEROXISOMAL\_LIPI

;CHROMOSOME\_MAINTENANCE;REACTOME\_DEPOSITION\_OF\_NEW\_CENPA\_CONTAINING\_NL

UNCTIONALIZATION\_OF\_COMPOUNDS;REACTOME\_ENDOGENOUS\_STEROLS;REACTOME\_S

ME\_ADAPTIVE\_IMMUNE\_SYSTEM

S\_IN\_ERBB4\_SIGNALING;REACTOME\_SHC1\_EVENTS\_IN\_ERBB4\_SIGNALING;REACTOME\_PI3  
KINASE\_ACTIVATION\_OF\_HOMO\_SAPIENS\_WITH\_MYCOBACTERIUM\_TUBERCULOSIS;REACTOME\_TRANSME  
:

WAY;REACTOME\_INTERFERON\_ALPHA\_BETA\_SIGNALING;REACTOME\_REGULATION\_OF\_IFN

ACTOME\_SIGNALLING\_TO\_ERKS;REACTOME\_SIGNALING\_BY\_PDGF;REACTOME\_DOWNSTRE

CTOME\_APOPTOSIS  
CTOME\_APOPTOSIS

ACTOME\_IMMUNE\_SYSTEM;REACTOME\_ADAPTIVE\_IMMUNE\_SYSTEM

ATION

REGATION



ACTOME\_SIGNAL\_TRANSDUCTION\_BY\_L1;REACTOME\_INTERFERON\_GAMMA\_SIGNALING;RE/

UNCTIONALIZATION\_OF\_COMPOUNDS;REACTOME\_STEROID\_HORMONES;REACTOME\_MET.  
UNCTIONALIZATION\_OF\_COMPOUNDS;REACTOME\_STEROID\_HORMONES;REACTOME\_MET.

NE\_BODY\_METABOLISM;REACTOME\_TRANSCRIPTIONAL\_REGULATION\_OF\_WHITE\_ADIPOC  
VG\_OF\_PG;REACTOME\_ACYL\_CHAIN\_REMODELLING\_OF\_PE;REACTOME\_ACYL\_CHAIN\_REM

REACTOME\_S\_PHASE  
REACTOME\_S\_PHASE

OME\_STEROID\_HORMONES;REACTOME\_METABOLISM\_OF\_LIPIDS\_AND\_LIPOPROTEINS;RE/

PROTEASOME\_DEGRADATION

AND\_ANKYRINS

COMPLEX\_AND\_EIF5\_AND\_SUBSEQUENT\_BINDING\_TO\_43S;REACTOME\_METABOLISM\_OF\_PI

SIGNALING\_BY\_ERBB2;REACTOME\_GRB2\_EVENTS\_IN\_ERBB2\_SIGNALING;REACTOME\_SIGNAL

ING\_CELL;REACTOME\_ACETYLCHOLINE\_BINDING\_AND\_DOWNSTREAM\_EVENTS;REACTOME

NUCLEAR\_EVENTS\_KINASE\_AND\_TRANSCRIPTION\_FACTOR\_ACTIVATION;REACTOME\_ERK

MAPK\_CASCADE

PROXIMAL\_TRANSCRIPTION;REACTOME\_RNA\_POL\_III\_TRANSCRIPTION\_INITIATION\_FROM\_TYPE

REACTOME\_FATTY\_ACID\_TRIACYLGLYCEROL\_AND\_KETONE\_BODY\_METABOLISM;REACTO

TOME\_FATTY\_ACID\_TRIACYLGLYCEROL\_AND\_KETONE\_BODY\_METABOLISM

I\_EXPRESSION;REACTOME\_YAP1\_AND\_WWTR1\_TAZ\_STIMULATED\_GENE\_EXPRESSION;RE.

OS\_OLIGOPEPTIDES

\_PHASE\_OF\_HIV\_LIFE\_CYCLE

NE\_BODY\_METABOLISM;REACTOME\_TRANSCRIPTIONAL\_REGULATION\_OF\_WHITE\_ADIPOC

ATION  
ATION  
ATION  
ATION

I\_PATHWAY;REACTOME\_SIGNALING\_BY\_TGF\_BETA\_RECEPTOR\_COMPLEX

NSMEMBRANE\_TRANSPORT;REACTOME\_TRANSPORT\_OF\_INORGANIC\_CATIONS\_ANIONS\_

1\_SIGNALING  
TIC\_CELL;REACTOME\_ACTIVATION\_OF\_KAINATE\_RECEPTORS\_UPON\_Glutamate\_BINDING  
TIC\_CELL;REACTOME\_ACTIVATION\_OF\_KAINATE\_RECEPTORS\_UPON\_Glutamate\_BINDING

IE\_HEMOSTASIS  
IE\_HEMOSTASIS

TOME\_INTEGRATION\_OF\_ENERGY\_METABOLISM;REACTOME\_OPIOID\_SIGNALLING;REACTO

;REACTOME\_THE\_ROLE\_OF\_NEF\_IN\_HIV1\_REPLICATION\_AND\_DISEASE\_PATHOGENESIS;R  
I\_EXPRESSION;REACTOME\_YAP1\_AND\_WWTR1\_TAZ\_STIMULATED\_GENE\_EXPRESSION;RE.  
I\_EXPRESSION;REACTOME\_YAP1\_AND\_WWTR1\_TAZ\_STIMULATED\_GENE\_EXPRESSION;RE.

\_AND\_TRANSLATION;REACTOME\_RORA\_ACTIVATES\_CIRCADIAN\_EXPRESSION;REACTOME.

RF7\_ACTIVATION\_IN\_TLR7\_8\_OR\_9\_SIGNALING;REACTOME\_INNATE\_IMMUNE\_SYSTEM;REA  
RF7\_ACTIVATION\_IN\_TLR7\_8\_OR\_9\_SIGNALING;REACTOME\_INNATE\_IMMUNE\_SYSTEM;REA  
UROTRANSMITTER\_RELEASE\_CYCLE;REACTOME\_NOREPINEPHRINE\_NEUROTRANSMITTER

OTIC\_COUPLING\_AND\_HEAT\_PRODUCTION\_BY\_UNCOUPLING\_PROTEINS\_

OME\_FATTY\_ACID\_TRIACYLGLYCEROL\_AND\_KETONE\_BODY\_METABOLISM;REACTOME\_TR

ING\_VIA\_NRAGE\_NRIF\_AND\_NADE;REACTOME\_P75\_NTR\_RECEPTOR\_MEDIATED\_SIGNALLI

TOR;REACTOME\_IMMUNE\_SYSTEM;REACTOME\_ADAPTIVE\_IMMUNE\_SYSTEM

LL\_CYCLE\_MITOTIC;REACTOME\_CELL\_CYCLE\_CHECKPOINTS;REACTOME\_REGULATION\_OF

PROTEASOME\_DEGRADATION

RECEPTORS;REACTOME\_G\_ALPHA\_Q\_SIGNALLING\_EVENTS;REACTOME\_GPCR\_DOWNSTREAM\_  
AND\_ORGANIC\_ACIDS\_METAL\_IONS\_AND\_AMINE\_COMPOUNDS;REACTOME\_METAL\_ION\_SLC  
AND\_ORGANIC\_ACIDS\_METAL\_IONS\_AND\_AMINE\_COMPOUNDS;REACTOME\_METAL\_ION\_SLC

REACTOME\_TRANSPORT\_OF\_INORGANIC\_CATIONS\_ANIONS\_AND\_AMINO\_ACIDS\_OLIGOPEPT

ENTS\_IN\_ERBB4\_SIGNALING;REACTOME\_PI3K\_EVENTS\_IN\_ERBB2\_SIGNALING;REACTOME\_

\_THE\_SINGLE\_NUCLEOTIDE\_REPLACEMENT\_PATHWAY;REACTOME\_DNA\_REPAIR;REACTOM



OME\_G\_ALPHA\_Z\_SIGNALLING\_EVENTS;REACTOME\_EFFECTS\_OF\_PIP2\_HYDROLYSIS;REA

S\_VIA\_24\_HYDROXYCHOLESTEROL;REACTOME\_SYNTHESIS\_OF\_BILE\_ACIDS\_AND\_BILE\_SA

EACTOME\_RECRUITMENT\_OF\_NUMA\_TO\_MITOTIC\_CENTROSOMES;REACTOME\_MITOTIC\_C

I\_EXPRESSION;REACTOME\_YAP1\_AND\_WWTR1\_TAZ\_STIMULATED\_GENE\_EXPRESSION;RE

\5\_SIGNALING;REACTOME\_RIG\_I\_MDA5\_MEDIATED\_INDUCTION\_OF\_IFN\_ALPHA\_BETA\_PATI

)TEASOME\_DEGRADATION

.TGF\_BETA\_RECEPTOR\_COMPLEX;REACTOME\_PLATELET\_ACTIVATION\_SIGNALING\_AND\_A

ND\_ORGANIC\_ACIDS\_METAL\_IONS\_AND\_AMINE\_COMPOUNDS;REACTOME\_FACILITATIVE\_N

ENTS\_IN\_ERBB4\_SIGNALING;REACTOME\_PI3K\_EVENTS\_IN\_ERBB2\_SIGNALING;REACTOME\_

PROTEASOME\_DEGRADATION  
PROTEASOME\_DEGRADATION

METABOLISM;REACTOME\_GLYCOSAMINOGLYCAN\_METABOLISM;REACTOME\_A\_TETRASACCHARIDE  
METABOLISM;REACTOME\_GLYCOSAMINOGLYCAN\_METABOLISM;REACTOME\_A\_TETRASACCHARIDE

POSTSEQUENT\_MODIFICATION

GASTRIN\_CREB\_SIGNALLING\_PATHWAY\_VIA\_PKC\_AND\_MAPK;REACTOME\_NUCLEAR\_EVENTS

REACTOME\_TRANSPORT;REACTOME\_SLC\_MEDIATED\_TRANSMEMBRANE\_TRANSPORT;REACTOME\_TRANSPORT;  
REACTOME\_TRANSPORT;REACTOME\_SLC\_MEDIATED\_TRANSMEMBRANE\_TRANSPORT;REACTOME\_TRANSPORT

CHAPTERS;REACTOME\_CELL\_SURFACE\_INTERACTIONS\_AT\_THE\_VASCULAR\_WALL;REACTOME

REACTOME\_FATTY\_ACID\_TRIACYLGLYCEROL\_AND\_KETONE\_BODY\_METABOLISM;REACTOME\_TRANSPORT

REGULATION\_OF\_AMPK\_ACTIVITY\_VIA\_LKB1;REACTOME\_ENERGY\_DEPENDENT\_REGULATION\_OF\_TRANSPORT;  
REGULATION\_OF\_IFNG\_SIGNALING;REACTOME\_INTERFERON\_GAMMA\_SIGNALING

S;REACTOME\_GPCR\_DOWNSTREAM\_SIGNALING;REACTOME\_G\_ALPHA\_I\_SIGNALLING\_EVE

\_GPCR\_DOWNSTREAM\_SIGNALING;REACTOME\_SEMA4D\_IN\_SEMAPHORIN\_SIGNALING;REA

;REACTOME\_GENERIC\_TRANSCRIPTION\_PATHWAY;REACTOME\_NOTCH\_HLH\_TRANSCRIPT  
;REACTOME\_GENERIC\_TRANSCRIPTION\_PATHWAY;REACTOME\_NOTCH\_HLH\_TRANSCRIPT

ORIAL\_TRANSCRIPTION;REACTOME\_RNA\_POL\_III\_TRANSCRIPTION\_INITIATION\_FROM\_TYPE

PROTEASOME\_DEGRADATION

G\_VIA\_NRAGE\_NRIF\_AND\_NADE;REACTOME\_P75\_NTR\_RECEPTOR\_MEDIATED\_SIGNALLING

ENT

V\_TYPE\_3\_PROMOTER

ALIGNING\_AND\_AGGREGATION

TRANSPORT\_OF\_MATURE\_TRANSCRIPT\_TO\_CYTOPLASM;REACTOME\_TRANSMEMBRANE\_TRANSPORT

AND\_REPULSION;REACTOME\_SEMAPHORIN\_INTERACTIONS;REACTOME\_SEMA3A\_PLEXIN\_RECEPTOR

SIGNALING\_AND\_AGGREGATION

ME\_P75\_NTR\_RECEPTOR\_MEDIATED\_SIGNALLING;REACTOME\_SIGNALING\_BY\_GPCR;REACTOME

3;REACTOME\_SIGNALING\_BY\_ERBB2;REACTOME\_SIGNALING\_BY\_EGFR\_IN\_CANCER;REACT

TABOLISM\_OF\_LIPIDS\_AND\_LIPOPOTEINS  
BY\_ERBB4;REACTOME\_ACTIVATED\_NOTCH1\_TRANSMITS\_SIGNAL\_TO\_THE\_NUCLEUS;REA

V\_SECRETION;REACTOME\_VOLTAGE\_GATED\_POTASSIUM\_CHANNELS;REACTOME\_POTASS

I\_EXPRESSION;REACTOME\_YAP1\_AND\_WWTR1\_TAZ\_STIMULATED\_GENE\_EXPRESSION;RE

DS\_OLIGOPEPTIDES;REACTOME\_PLATELET\_HOMEOSTASIS;REACTOME\_PLATELET\_CALCIUM

S;REACTOME\_INTERACTION\_BETWEEN\_L1\_AND\_ANKYRINS;REACTOME\_NEPHRIN\_INTERAC  
S;REACTOME\_INTERACTION\_BETWEEN\_L1\_AND\_ANKYRINS;REACTOME\_NEPHRIN\_INTERAC

ION;REACTOME\_MYD88\_MAL\_CASCADE\_INITIATED\_ON\_PLASMA\_MEMBRANE;REACTOME\_I

REACTOME\_METABOLISM\_OF\_PROTEINS;REACTOME\_POST\_TRANSLATIONAL\_PROTEIN\_MC

REACTOME\_CELL\_SURFACE\_INTERACTIONS\_AT\_THE\_VASCULAR\_WALL;REACTOME\_COMM

SECRETION\_AND\_INACTIVATION;REACTOME\_SYNTHESIS\_SECRETION\_AND\_INACTIVATION\_C  
SECRETION\_AND\_INACTIVATION;REACTOME\_SYNTHESIS\_SECRETION\_AND\_INACTIVATION\_C

ACTOME\_SYNTHESIS\_OF\_BILE\_ACIDS\_AND\_BILE\_SALTS;REACTOME\_METABOLISM\_OF\_LIPI



TIME\_LOSS\_OF\_NLP\_FROM\_MITOTIC\_CENTROSOMES;REACTOME\_MITOTIC\_G2\_G2\_M\_PHASE  
ION\_BY\_GLUCAGON\_LIKE\_PEPTIDE1;REACTOME\_REGULATION\_OF\_INSULIN\_SECRETION;R  
TIC\_CELL;REACTOME\_ACETYLCHOLINE\_BINDING\_AND\_DOWNSTREAM\_EVENTS;REACTOME  
E\_CYCLASE;REACTOME\_PLATELET\_HOMEOSTASIS;REACTOME\_HEMOSTASIS

S;REACTOME\_INTEGRIN\_CELL\_SURFACE\_INTERACTIONS;REACTOME\_AXON\_GUIDANCE;RE  
\_NCAM1\_INTERACTIONS;REACTOME\_NCAM\_SIGNALING\_FOR\_NEURITE\_OUT\_GROWTH  
REACTOME\_SIGNALING\_BY\_FGFR1\_MUTANTS;REACTOME\_SIGNALING\_BY\_FGFR1\_FUSION\_

NE\_TRANSPORT;REACTOME\_TRANSPORT\_OF\_GLUCOSE\_AND\_OTHER\_SUGARS\_BILE\_SAL

IA\_MEMBRANE;REACTOME\_PI3K\_AKT\_ACTIVATION;REACTOME\_SIGNALING\_BY\_INSULIN\_RE  
:PTORS;REACTOME\_G\_ALPHA\_Q\_SIGNALLING\_EVENTS;REACTOME\_GPCR\_DOWNSTREAM\_

CULES;REACTOME\_SLC\_MEDIATED\_TRANSMEMBRANE\_TRANSPORT;REACTOME\_TRANSPOR

\_IN\_ERBB2\_SIGNALING;REACTOME\_SIGNALING\_BY\_EGFR\_IN\_CANCER;REACTOME\_SHC1\_E

OS\_OLIGOPEPTIDES

\_SIGNALING\_ACTIVATES\_SMADS;REACTOME\_SIGNALING\_BY\_TGF\_BETA\_RECEPTOR\_COM

OME\_GPCR\_DOWNSTREAM\_SIGNALING;REACTOME\_G\_ALPHA\_I\_SIGNALLING\_EVENTS;REA

ABOLISM\_OF\_PORPHYRINS

ON\_REPULSION;REACTOME\_SEMAPHORIN\_INTERACTIONS;REACTOME\_SEMA3A\_PLEXIN\_RI

NA\_REPAIR;REACTOME\_CHROMOSOME\_MAINTENANCE;REACTOME\_ACTIVATION\_OF\_ATR\_

N\_PATHWAY;REACTOME\_SIGNALING\_BY\_TGF\_BETA\_RECEPTOR\_COMPLEX

ASSIUM\_CHANNELS

IA\_I\_SIGNALLING\_EVENTS;REACTOME\_GPCR\_LIGAND\_BINDING

ATION

\_SYSTEM;REACTOME\_ADAPTIVE\_IMMUNE\_SYSTEM;REACTOME\_CLASS\_I\_MHC\_MEDIATED\_  
\_SYSTEM;REACTOME\_ADAPTIVE\_IMMUNE\_SYSTEM;REACTOME\_CLASS\_I\_MHC\_MEDIATED\_

TIC\_CELL;REACTOME\_TRANSMEMBRANE\_TRANSPORT\_OF\_SMALL\_MOLECULES;REACTOMI

IS\_OLIGOPEPTIDES

OS\_OLIGOPEPTIDES  
EACTOME\_MITOTIC\_G2\_G2\_M\_PHASES

OS\_OLIGOPEPTIDES

.GE\_SIGNALS\_DEATH\_THROUGH\_JNK;REACTOME\_CELL\_DEATH\_SIGNALLING\_VIA\_NRAGE\_I  
.GE\_SIGNALS\_DEATH\_THROUGH\_JNK;REACTOME\_CELL\_DEATH\_SIGNALLING\_VIA\_NRAGE\_I

ENERGY\_DEPENDENT\_REGULATION\_OF\_MTOR\_BY\_LKB1\_AMPK;REACTOME\_REGULATION  
OF\_CHOLESTEROL\_BIOSYNTHESIS

PROCESSES\_AT\_THE\_CENTROMERE;REACTOME\_DNA\_REPLICATION;REACTOME\_MITOTIC\_PRO

CESSING;REACTOME\_SIGNALING\_BY\_CONSTITUTIVELY\_ACTIVE\_EGFR;REACTOME\_SIGNALING\_E

OF\_GAG\_METABOLISM;REACTOME\_GLYCOSAMINOGLYCAN\_METABOLISM;REACTOME\_A\_TETR

ACTIVATION\_OF\_ARYLSULFATASES;REACTOME\_METABOLISM\_OF\_PROTEINS;REACTOM

OSIS\_OF\_M\_PHASES;REACTOME\_ACTIVATION\_OF\_ATR\_IN\_RESPONSE\_TO\_REPLICATION\_STRESS;R  
EPLICATION\_OF\_M\_PHASES;REACTOME\_ACTIVATION\_OF\_ATR\_IN\_RESPONSE\_TO\_REPLICATION\_STRESS;R

REACTOME\_FRS2\_MEDIATED\_CASCADE;REACTOME\_PI\_3K\_CASCADE;REACTOME\_DOWNS1  
REACTOME\_FRS2\_MEDIATED\_CASCADE;REACTOME\_PI\_3K\_CASCADE;REACTOME\_DOWNS1  
REACTOME\_FRS2\_MEDIATED\_CASCADE;REACTOME\_PI\_3K\_CASCADE;REACTOME\_DOWNS1

OME\_3\_UTR\_MEDIATED\_TRANSLATIONAL\_REGULATION;REACTOME\_METABOLISM\_OF\_MRN

SEQUENT\_MODIFICATION;REACTOME\_N\_GLYCAN\_ANTENNAE\_ELONGATION;REACTOME\_N  
ED\_GLYCOSYLATION;REACTOME\_BIOSYNTHESIS\_OF\_THE\_N\_GLYCAN\_PRECURSOR\_DOLIC

\_LEADING\_TO\_GENERATION\_OF\_SECOND\_MESSENGERS;REACTOME\_SIGNALING\_BY\_THE

OME\_3\_UTR\_MEDIATED\_TRANSLATIONAL\_REGULATION;REACTOME\_METABOLISM\_OF\_MRN

:ULES



PROTEASOME\_DEGRADATION

CARBOHYDRATES  
\_SIGNALING; REACTOME\_DOWNSTREAM\_TCR\_SIGNALING; REACTOME\_IMMUNE\_SYSTEM; RE

ACTOME\_EFFECTS\_OF\_PIP2\_HYDROLYSIS; REACTOME\_HEMOSTASIS; REACTOME\_PLATELET\_A

ACTOME\_JNK\_C\_JUN\_KINASES\_PHOSPHORYLATION\_AND\_ACTIVATION\_MEDIATED\_BY\_ACTI

ACTOME\_CITRIC\_ACID\_CYCLE\_TCA\_CYCLE

PLASMA\_MEMBRANE;REACTOME\_SIGNALING\_BY\_FGFR\_IN\_DISEASE;REACTOME\_TRANSMI

ACTOME\_PLATELET\_ADHESION\_TO\_EXPOSED\_COLLAGEN;REACTOME\_INTEGRIN\_CELL\_SUR

PROTEASOME\_DEGRADATION

ATION

SOME\_PATHWAY;REACTOME\_CELL\_CYCLE;REACTOME\_ORC1\_REMOVAL\_FROM\_CHROMAT  
\_REPLICATIVE\_COMPLEX;REACTOME\_E2F\_ENABLED\_INHIBITION\_OF\_PRE\_REPLICATION\_C

OME\_EFFECTS\_OF\_PIP2\_HYDROLYSIS;REACTOME\_HEMOSTASIS;REACTOME\_PLATELET\_A  
OME\_EFFECTS\_OF\_PIP2\_HYDROLYSIS;REACTOME\_HEMOSTASIS;REACTOME\_PLATELET\_A  
S;REACTOME\_IRON\_UPTAKE\_AND\_TRANSPORT;REACTOME\_TRANSFERRIN\_ENDOCYTOSIS

OS\_ACTIVATION\_AND\_REGULATION;REACTOME\_NITRIC\_OXIDE\_STIMULATES\_GUANYLATE\_I  
ALING;REACTOME\_SEMAPHORIN\_INTERACTIONS;REACTOME\_FACTORS\_INVOLVED\_IN\_MEC  
GULATION\_OF\_AMPK\_ACTIVITY\_VIA\_LKB1;REACTOME\_ENERGY\_DEPENDENT\_REGULATION  
GULATION\_OF\_AMPK\_ACTIVITY\_VIA\_LKB1;REACTOME\_ENERGY\_DEPENDENT\_REGULATION

TEASOME\_DEGRADATION

CTOME\_SIGNALING\_BY\_FGFR1\_MUTANTS;REACTOME\_SIGNALING\_BY\_ACTIVATED\_POINT\_M  
CTOME\_SIGNALING\_BY\_FGFR1\_MUTANTS;REACTOME\_SIGNALING\_BY\_ACTIVATED\_POINT\_M

\_THE\_SINGLE\_NUCLEOTIDE\_REPLACEMENT\_PATHWAY;REACTOME\_DNA\_REPAIR;REACTOM

NE\_SENSITIVE\_LIPASE\_HSL\_MEDIATED\_TRIACYLGLYCEROL\_HYDROLYSIS;REACTOME\_LIPI

ON\_ORGANIZATION;REACTOME\_APOPTOSIS;REACTOME\_APOPTOTIC\_EXECUTION\_PHASE

LE;REACTOME\_TRANSMEMBRANE\_TRANSPORT\_OF\_SMALL\_MOLECULES;REACTOME\_SLC

OS\_OLIGOPEPTIDES

OTIC\_COUPLING\_AND\_HEAT\_PRODUCTION\_BY\_UNCOUPLING\_PROTEINS\_

ME\_SIGNALLING\_TO\_ERKS;REACTOME\_SIGNALING\_BY\_INSULIN\_RECEPTOR;REACTOME\_SI

EACTOME\_MITOTIC\_G2\_G2\_M\_PHASES

ENTS\_IN\_ERBB4\_SIGNALING;REACTOME\_PI3K\_EVENTS\_IN\_ERBB2\_SIGNALING;REACTOME\_

YTEASOME\_DEGRADATION

YLE;REACTOME\_INTEGRATION\_OF\_ENERGY\_METABOLISM;REACTOME\_DOPAMINE\_NEURO

AL\_PROTEINS;REACTOME\_AXON\_GUIDANCE;REACTOME\_NCAM\_SIGNALING\_FOR\_NEURITE

AL\_PROTEINS;REACTOME\_AXON\_GUIDANCE;REACTOME\_NCAM\_SIGNALING\_FOR\_NEURITE

AL\_PROTEINS;REACTOME\_AXON\_GUIDANCE;REACTOME\_NCAM\_SIGNALING\_FOR\_NEURITE

AL\_PROTEINS;REACTOME\_AXON\_GUIDANCE;REACTOME\_NCAM\_SIGNALING\_FOR\_NEURITE

ED\_GLYCOSYLATION;REACTOME\_BIOSYNTHESIS\_OF\_THE\_N\_GLYCAN\_PRECURSOR\_DOLIC

ACTOME\_SIGNALLING\_TO\_ERKS;REACTOME\_SIGNALING\_BY\_PDGF;REACTOME\_DOWNSTRE

ORIAL\_TRANSCRIPTION

\_NCAM1\_INTERACTIONS;REACTOME\_NCAM\_SIGNALING\_FOR\_NEURITE\_OUT\_GROWTH

\_NCAM1\_INTERACTIONS;REACTOME\_NCAM\_SIGNALING\_FOR\_NEURITE\_OUT\_GROWTH

\_NCAM1\_INTERACTIONS;REACTOME\_NCAM\_SIGNALING\_FOR\_NEURITE\_OUT\_GROWTH

\_ALPHA\_BETA\_PATHWAYS;REACTOME\_APOPTOSIS;REACTOME\_INNATE\_IMMUNE\_SYSTEM;

Y;TOME\_N\_GLYCAN\_TRIMMING\_IN\_THE\_ER\_AND\_CALNEXIN\_CALRETICULIN\_CYCLE

YS\_OLIGOPEPTIDES

)PROTEINS;REACTOME\_LIPID\_DIGESTION\_MOBILIZATION\_AND\_TRANSPORT;REACTOME\_LI  
)PROTEINS;REACTOME\_LIPID\_DIGESTION\_MOBILIZATION\_AND\_TRANSPORT;REACTOME\_LI

INS\_;REACTOME\_INTEGRIN\_ALPHAIIIB\_BETA3\_SIGNALING;REACTOME\_PLATELET\_AGGREG.

JAL\_SYSTEM;REACTOME\_NEUROTRANSMITTER\_RELEASE\_CYCLE;REACTOME\_ACETYLCHC



OME\_REGULATION\_OF\_SIGNALING\_BY\_CBL;REACTOME\_IL\_3\_5\_AND\_GM-CSF\_SIGNALING;

CYTE\_DEVELOPMENT\_AND\_PLATELET\_PRODUCTION;REACTOME\_HEMOSTASIS  
CYTE\_DEVELOPMENT\_AND\_PLATELET\_PRODUCTION;REACTOME\_HEMOSTASIS

SOME\_PATHWAY;REACTOME\_CELL\_CYCLE;REACTOME\_ORC1\_REMOVAL\_FROM\_CHROMAT

;REACTOME\_SIGNALING\_BY\_EGFR\_IN\_CANCER;REACTOME\_NGF\_SIGNALLING\_VIA\_TRKA\_

ATION  
ATION  
ATION  
ATION

ATION

REPRESSION\_OF\_EXPRESSION\_BY\_REV\_ERBA;REACTOME\_METABOLISM\_OF\_LIPIDS\_AND\_I

ACTS;REACTOME\_NITRIC\_OXIDE\_STIMULATES\_GUANYLATE\_CYCLASE;REACTOME\_PLATELE  
UNCTIONALIZATION\_OF\_COMPOUNDS;REACTOME\_STEROID\_HORMONES;REACTOME\_MET.

R;REACTOME\_PEPTIDE\_LIGAND\_BINDING\_RECEPTORS;REACTOME\_CLASS\_A1\_RHODOPSI

ND\_ORGANIC\_ACIDS\_METAL\_IONS\_AND\_AMINE\_COMPOUNDS;REACTOME\_NA\_CL\_DEPEND

E

\_BODY\_METABOLISM;REACTOME\_SYNTHESIS\_OF\_VERY\_LONG\_CHAIN\_FATTY\_ACYL\_COAS

EACTOME\_MITOTIC\_M\_M\_G1\_PHASES;REACTOME\_MITOTIC\_G2\_G2\_M\_PHASES;REACTOME

ROL\_AND\_KETONE\_BODY\_METABOLISM

ATURE\_MRNA\_DERIVED\_FROM\_AN\_INTRONLESS\_TRANSCRIPT

ENTS\_IN\_ERBB4\_SIGNALING;REACTOME\_PI3K\_EVENTS\_IN\_ERBB2\_SIGNALING;REACTOME\_

1\_TRANSITION;REACTOME\_G1\_S\_TRANSITION;REACTOME\_POL\_SWITCHING;REACTOME\_S

ACTOME\_IMMUNE\_SYSTEM;REACTOME\_ADAPTIVE\_IMMUNE\_SYSTEM

EACTOME\_DARPP\_32\_EVENTS;REACTOME\_METABOLISM\_OF\_LIPIDS\_AND\_LIPOPROTEINS;I  
OTIC\_COUPLING\_AND\_HEAT\_PRODUCTION\_BY\_UNCOUPLING\_PROTEINS\_  
S;REACTOME\_IRON\_UPTAKE\_AND\_TRANSPORT;REACTOME\_TRANSFERRIN\_ENDOCYTOSIS

:ULES;REACTOME\_TRANSPORT\_OF\_ORGANIC\_ANIONS

I\_MHC\_MEDIATED\_ANTIGEN\_PROCESSING\_PRESENTATION;REACTOME\_ANTIGEN\_PROCES  
RIACYLGLYCEROL\_AND\_KETONE\_BODY\_METABOLISM  
!\_OF\_REPLICATION\_INDEPENDENT\_DOUBLE\_STRAND\_BREAKS;REACTOME\_P53\_DEPENDEI

G\_VIA\_NRAGE\_NRIF\_AND\_NADE;REACTOME\_P75\_NTR\_RECEPTOR\_MEDIATED\_SIGNALLING  
G\_VIA\_NRAGE\_NRIF\_AND\_NADE;REACTOME\_P75\_NTR\_RECEPTOR\_MEDIATED\_SIGNALLING

TREAM\_TCR\_SIGNALING;REACTOME\_PHOSPHORYLATION\_OF\_CD3\_AND\_TCR\_ZETA\_CHAIN

:\_METABOLISM\_OF\_LIPIDS\_AND\_LIPOPROTEINS  
:\_METABOLISM\_OF\_LIPIDS\_AND\_LIPOPROTEINS

:ANSMEMBRANE\_TRANSPORT;REACTOME\_METABOLISM\_OF\_LIPIDS\_AND\_LIPOPROTEINS;R

ATION  
ATION

PLASMA\_MEMBRANE;REACTOME\_SIGNALING\_BY\_FGFR\_IN\_DISEASE;REACTOME\_TRANSMI

.PTIVE\_IMMUNE\_SYSTEM

CTOME\_FORMATION\_OF\_TUBULIN\_FOLDING\_INTERMEDIATES\_BY\_CCT\_TRIC;REACTOME\_M

\_THE\_SINGLE\_NUCLEOTIDE\_REPLACEMENT\_PATHWAY;REACTOME\_DNA\_REPAIR;REACTOM

NE\_BODY\_METABOLISM;REACTOME\_TRANSCRIPTIONAL\_REGULATION\_OF\_WHITE\_ADIPOC  
E\_HEMOSTASIS

)\_CALNEXIN\_CALRETICULIN\_CYCLE

1UNE\_SYSTEM

DE\_EXCISION\_REPAIR;REACTOME\_REPAIR\_SYNTHESIS\_FOR\_GAP\_FILLING\_BY\_DNA\_POL\_I

ING\_BY\_PDGF;REACTOME\_AXON\_GUIDANCE;REACTOME\_NCAM1\_INTERACTIONS;REACTOME

\_POL\_II\_PRE\_TRANSCRIPTION\_EVENTS;REACTOME\_HIV\_INFECTION;REACTOME\_HIV\_LIFE\_  
BRANE\_TRANSPORT\_OF\_SMALL\_MOLECULES;REACTOME\_SLC\_MEDIATED\_TRANSMEMBRAI

PCR\_DOWNSTREAM\_SIGNALING;REACTOME\_G\_ALPHA\_S\_SIGNALLING\_EVENTS;REACTOME

IZATION;REACTOME\_NEPHRIN\_INTERACTIONS;REACTOME\_HEMOSTASIS;REACTOME\_PLA

S;REACTOME\_GPCR\_DOWNSTREAM\_SIGNALING;REACTOME\_GPCR\_LIGAND\_BINDING

ACTOME\_IMMUNE\_SYSTEM;REACTOME\_ADAPTIVE\_IMMUNE\_SYSTEM

REACTOME\_SIGNALING\_BY\_ERBB4;REACTOME\_DOWNREGULATION\_OF\_ERBB2\_ERBB3\_SIK  
\_BY\_NOTCH3;REACTOME\_RECEPTOR\_LIGAND\_BINDING\_INITIATES\_THE\_SECOND\_PROTEO  
)RIAL\_TRANSCRIPTION

)TEASOME\_DEGRADATION  
)TEASOME\_DEGRADATION

TIC\_CELL;REACTOME\_ACETYLCHOLINE\_BINDING\_AND\_DOWNSTREAM\_EVENTS;REACTOME

TOME\_INTEGRATION\_OF\_ENERGY\_METABOLISM;REACTOME\_OPIOID\_SIGNALLING;REACTO  
\_AND\_ANKYRINS  
\_AND\_ANKYRINS



REACTOME\_OTHER\_SEMAPHORIN\_INTERACTIONS;REACTOME\_SEMAPHORIN\_INTERACTIOI

UNCTIONALIZATION\_OF\_COMPOUNDS;REACTOME\_ENDOGENOUS\_STEROLS;REACTOME\_S

ME\_P75\_NTR\_RECEPTOR\_MEDIATED\_SIGNALLING;REACTOME\_SIGNALING\_BY\_GPCR;REAC

ND\_ORGANIC\_ACIDS\_METAL\_IONS\_AND\_AMINE\_COMPOUNDS;REACTOME\_AMINE\_COMPOL

1A\_I\_SIGNALLING\_EVENTS;REACTOME\_GPCR\_LIGAND\_BINDING

OME\_3\_UTR\_MEDIATED\_TRANSLATIONAL\_REGULATION;REACTOME\_METABOLISM\_OF\_MRN

\_AND\_TRANSLATION;REACTOME\_RORA\_ACTIVATES\_CIRCADIAN\_EXPRESSION;REACTOME  
\_AND\_TRANSLATION;REACTOME\_RORA\_ACTIVATES\_CIRCADIAN\_EXPRESSION;REACTOME  
\_AND\_TRANSLATION;REACTOME\_RORA\_ACTIVATES\_CIRCADIAN\_EXPRESSION;REACTOME  
PLASMA\_MEMBRANE;REACTOME\_SIGNALING\_BY\_FGFR\_IN\_DISEASE;REACTOME\_TRANSMI

ASCAD

OSTASIS;REACTOME\_PLATELET\_CALCIIUM\_HOMEOSTASIS;REACTOME\_ION\_TRANSPORT\_B

SPORT\_OF\_MATURE\_TRANSCRIPT\_TO\_CYTOPLASM;REACTOME\_TRANSMEMBRANE\_TRANSPORT\_OF\_MATURE\_TRANSCRIPT\_TO\_CYTOPLASM;REACTOME\_TRANSMEMBRANE\_TRANSM

OS\_OLIGOPEPTIDES

OS\_OLIGOPEPTIDES

:

OGF;REACTOME\_DOWNSTREAM\_SIGNAL\_TRANSDUCTION;REACTOME\_PLATELET\_AGGREG.

ON\_CASCADE;REACTOME\_HEMOSTASIS;REACTOME\_INNATE\_IMMUNE\_SYSTEM;REACTOMI

CTOME\_RNA\_POL\_I\_TRANSCRIPTION\_INITIATION

TIC\_CELL;REACTOME\_ACTIVATION\_OF\_NMDA\_RECEPTOR\_UPON\_GLUTAMATE\_BINDING\_AI

OTEASOME\_DEGRADATION

ND\_ORGANIC\_ACIDS\_METAL\_IONS\_AND\_AMINE\_COMPOUNDS;REACTOME\_BILE\_SALT\_AND  
CTOME\_MRNA\_CAPPING;REACTOME\_TRANSCRIPTION\_COUPLED\_NER\_TC\_NER;REACTOM  
ON\_CASCADE;REACTOME\_GPCR\_DOWNSTREAM\_SIGNALING;REACTOME\_G\_BETA\_GAMMA

PARA\_ACTIVATES\_GENE\_EXPRESSION;REACTOME\_RORA\_ACTIVATES\_CIRCADIAN\_EXPRES  
PARA\_ACTIVATES\_GENE\_EXPRESSION;REACTOME\_RORA\_ACTIVATES\_CIRCADIAN\_EXPRES

TION\_OF\_NFKB\_AND\_MAP\_KINASES\_UPON\_TLR7\_8\_OR\_9\_ACTIVATION;REACTOME\_NFKB\_A  
E\_HEMOSTASIS  
ND\_ORGANIC\_ACIDS\_METAL\_IONS\_AND\_AMINE\_COMPOUNDS;REACTOME\_BILE\_SALT\_AND  
ND\_ORGANIC\_ACIDS\_METAL\_IONS\_AND\_AMINE\_COMPOUNDS;REACTOME\_BILE\_SALT\_AND

;REACTOME\_SIGNALING\_BY\_EGFR\_IN\_CANCER;REACTOME\_NGF\_SIGNALLING\_VIA\_TRKA

ME\_NCAM\_SIGNALING\_FOR\_NEURITE\_OUT\_GROWTH  
ME\_3\_UTR\_MEDIATED\_TRANSLATIONAL\_REGULATION;REACTOME\_METABOLISM\_OF\_MRN

VENTS\_IN\_ERBB2\_SIGNALING;REACTOME\_AXON\_GUIDANCE;REACTOME\_SEMA4D\_IN\_SEMA  
CTOME\_GPCR\_DOWNSTREAM\_SIGNALING;REACTOME\_G\_ALPHA\_I\_SIGNALLING\_EVENTS;REA

;TOME\_SIGNALING\_BY\_FGFR\_IN\_DISEASE;REACTOME\_SIGNALING\_BY\_FGFR1\_MUTANTS;RI  
;TOME\_SIGNALING\_BY\_FGFR\_IN\_DISEASE;REACTOME\_SIGNALING\_BY\_FGFR1\_MUTANTS;RI  
;TOME\_SIGNALING\_BY\_FGFR\_IN\_DISEASE;REACTOME\_SIGNALING\_BY\_FGFR1\_MUTANTS;RI

TIC\_CELL;REACTOME\_TRAFFICKING\_OF\_AMPA\_RECEPTORS;REACTOME\_TRAFFICKING\_OF  
)TEASOME\_DEGRADATION

CTOME\_PLATELET\_ADHESION\_TO\_EXPOSED\_COLLAGEN;REACTOME\_INTEGRIN\_CELL\_SUR

S\_PATHWAYS;REACTOME\_SYNTHESIS\_SECRETION\_AND\_DEACYLATION\_OF\_GHRELIN;REA

DIATED\_EVENTS;REACTOME\_SIGNALING\_BY\_INSULIN\_RECEPTOR;REACTOME\_MTORC1\_I

ACTOME\_INTEGRATION\_OF\_ENERGY\_METABOLISM;REACTOME\_METABOLISM\_OF\_LIPIDS\_  
ACTOME\_INTEGRATION\_OF\_ENERGY\_METABOLISM;REACTOME\_METABOLISM\_OF\_LIPIDS\_

ME\_GLUCAGON\_TYPE\_LIGAND\_RECEPTORS;REACTOME\_GPCR\_DOWNSTREAM\_SIGNALING

EACTOME\_MITOTIC\_G2\_G2\_M\_PHASES  
IA\_S\_SIGNALLING\_EVENTS;REACTOME\_GPCR\_LIGAND\_BINDING

ALL;REACTOME\_BASIGIN\_INTERACTIONS;REACTOME\_INTEGRIN\_CELL\_SURFACE\_INTERAC

D\_INTRON\_CONTAINING\_PRE\_MRNA;REACTOME\_RNA\_POL\_II\_TRANSCRIPTION;REACTOME

\_BINDING

D\_MESSENGERS;REACTOME\_SIGNALING\_BY\_THE\_B\_CELL\_RECEPTOR\_BCR;REACTOME\_N  
\_DEATH\_THROUGH\_JNK;REACTOME\_CELL\_DEATH\_SIGNALLING\_VIA\_NRAGE\_NRIF\_AND\_N/

REPAIR

REPAIR

ATION

ATION

ATION

INDUCTION\_OF\_IFN\_ALPHA\_BETA\_PATHWAYS;REACTOME\_INNATE\_IMMUNE\_SYSTEM;REAC



S;REACTOME\_P2Y\_RECEPTORS;REACTOME\_NUCLEOTIDE\_LIKE\_PURINERGIC\_RECEPTORS  
REACTOME\_INTERFERON\_SIGNALING;REACTOME\_IMMUNE\_SYSTEM;REACTOME\_ADAPTIVE  
:\_IMMUNE\_SYSTEM;REACTOME\_CYTOKINE\_SIGNALING\_IN\_IMMUNE\_SYSTEM

\_TRANSPORT  
\_TRANSPORT

G\_VIA\_TRKA\_FROM\_THE\_PLASMA\_MEMBRANE;REACTOME\_SIGNALING\_BY\_FGFR\_IN\_DISEASE

ACTIVATES\_SMADS;REACTOME\_RES  
PIGMENT\_SIGNALING

REACTOME\_GPCR\_DOWNSTREAM\_SIGNALING;REACTOME\_GPCR\_LIGAND\_BINDING

REACTOME\_PLATELET\_HOMEOSTASIS;REACTOME\_PLATELET\_CALCIIUM

CELL\_GROWTH\_CONE\_COLLAPSE

REACTOME\_CELL\_CYCLE\_MITOTIC;REACTOME\_TRANSCRIPTION  
ON\_THE\_LAGGING\_STRAND;REACTOME\_CELL\_CYCLE\_MITOTIC;REACTOME\_TRANSCRIPTION  
ON\_THE\_LAGGING\_STRAND;REACTOME\_CELL\_CYCLE\_MITOTIC;REACTOME\_TRANSCRIPTION

TIC\_CELL;REACTOME\_TRAFFICKING\_OF\_AMPA\_RECEPTORS

STASIS

REACTOME\_MITOTIC\_G2\_G2\_M\_PHASES

TIC\_CELL;REACTOME\_TRAFFICKING\_OF\_AMPA\_RECEPTORS

RBB2;REACTOME\_SIGNALING\_BY\_CONSTITUTIVELY\_ACTIVE\_EGFR;REACTOME\_SIGNALING

OS\_OLIGOPEPTIDES

ND\_ORGANIC\_ACIDS\_METAL\_IONS\_AND\_AMINE\_COMPOUNDS;REACTOME\_BILE\_SALT\_AND

C\_REGULATION;REACTOME\_REGULATION\_OF\_INSULIN\_SECRETION\_BY\_GLUCAGON\_LIKE\_  
C\_REGULATION;REACTOME\_REGULATION\_OF\_INSULIN\_SECRETION\_BY\_GLUCAGON\_LIKE\_

\_NCAM1\_INTERACTIONS;REACTOME\_NCAM\_SIGNALING\_FOR\_NEURITE\_OUT\_GROWTH  
\_NCAM1\_INTERACTIONS;REACTOME\_NCAM\_SIGNALING\_FOR\_NEURITE\_OUT\_GROWTH  
EIN\_RESPONSE

:VATED\_PLATELET\_CYTOSOLIC\_CA2\_;REACTOME\_SIGNALING\_BY\_GPCR;REACTOME\_PEPT

MUNE\_SYSTEM

ME\_P75\_NTR\_RECEPTOR\_MEDIATED\_SIGNALLING;REACTOME\_SIGNALING\_BY\_GPCR;REAC

PROCESSING;REACTOME\_MRNA\_SPLICING;REACTOME\_TRANSCRIPTION;REACTOME\_MRNA\_3.

SURFACE\_INTERACTIONS;REACTOME\_HEMOSTASIS;REACTOME\_IMMUNE\_SYSTEM;REACTC  
\_NCAM1\_INTERACTIONS;REACTOME\_NCAM\_SIGNALING\_FOR\_NEURITE\_OUT\_GROWTH

EACTOME\_MITOTIC\_G2\_G2\_M\_PHASES

E\_NUCLEOTIDE\_LIKE\_PURINERGIC\_RECEPTORS;REACTOME\_GPCR\_DOWNSTREAM\_SIGNA

OINTS;REACTOME\_M\_G1\_TRANSITION;REACTOME\_G1\_S\_TRANSITION;REACTOME\_SYNTHE  
TION\_AND\_GROWTH\_CONE\_COLLAPSE

IGNALING\_IN\_IMMUNE\_SYSTEM

METABOLISM\_OF\_LIPIDS\_AND\_LIPOPROTEINS

HEART\_CELL;REACTOME\_INHIBITION\_OF\_VOLTAGE\_GATED\_CA2\_CHANNELS\_VIA\_GBETA\_GAMMA  
HEART\_CELL;REACTOME\_INHIBITION\_OF\_VOLTAGE\_GATED\_CA2\_CHANNELS\_VIA\_GBETA\_GAMMA

RECEPTORS;REACTOME\_G\_ALPHA\_Q\_SIGNALLING\_EVENTS;REACTOME\_GPCR\_DOWNSTREAM\_EFFECTOR\_ACTIVATION;  
HEART\_CELL;REACTOME\_RNA\_POL\_III\_TRANSCRIPTION\_INITIATION\_FROM\_TYPE\_III\_PROMOTER;  
HEART\_CELL;REACTOME\_RNA\_POL\_III\_TRANSCRIPTION\_INITIATION\_FROM\_TYPE\_III\_PROMOTER

HEART\_CELL;REACTOME\_ACTIVATION\_OF\_ARYLSULFATASES;REACTOME\_METABOLISM\_OF\_PROTEINS;REACTOME

SYSTEM

ME\_P75\_NTR\_RECEPTOR\_MEDIATED\_SIGNALLING;REACTOME\_ROLE\_OF\_DCC\_IN\_REGULAT

SPLICING;REACTOME\_MITOTIC\_M\_M\_G1\_PHASES;REACTOME\_CHROMOSOME\_MAINTENAN  
)TEASOME\_DEGRADATION

ME\_P75\_NTR\_RECEPTOR\_MEDIATED\_SIGNALLING;REACTOME\_SIGNALING\_BY\_GPCR;REAC

OME\_FATTY\_ACID\_TRIACYLGLYCEROL\_AND\_KETONE\_BODY\_METABOLISM;REACTOME\_TR

\_BODY\_METABOLISM;REACTOME\_SYNTHESIS\_OF\_VERY\_LONG\_CHAIN\_FATTY\_ACYL\_COAS

ILISM;REACTOME\_GLYCOSAMINOGLYCAN\_METABOLISM;REACTOME\_A\_TETRASACCHARIDE  
S\_OLIGOPEPTIDES

\_GAG\_METABOLISM;REACTOME\_GLYCOSAMINOGLYCAN\_METABOLISM;REACTOME\_A\_TETR  
S;REACTOME\_ION\_CHANNEL\_TRANSPORT;REACTOME\_HEMOSTASIS

TIONS;REACTOME\_INTERACTION\_BETWEEN\_L1\_AND\_ANKYRINS;REACTOME\_SIGNAL\_TRAN  
TIONS;REACTOME\_INTERACTION\_BETWEEN\_L1\_AND\_ANKYRINS;REACTOME\_SIGNAL\_TRAN



EACTOME\_MITOTIC\_M\_M\_G1\_PHASES;REACTOME\_MITOTIC\_G2\_G2\_M\_PHASES;REACTOME

\_BY\_NOTCH3;REACTOME\_RECEPTOR\_LIGAND\_BINDING\_INITIATES\_THE\_SECOND\_PROTEO

E\_DEVELOPMENT\_AND\_PLATELET\_PRODUCTION;REACTOME\_KINESINS;REACTOME\_DNA\_F

\_AND\_ANKYRINS

ABOLISM\_OF\_LIPIDS\_AND\_LIPOPROTEINS;REACTOME\_LIPID\_DIGESTION\_MOBILIZATION\_AN

ND\_ORGANIC\_ACIDS\_METAL\_IONS\_AND\_AMINE\_COMPOUNDS;REACTOME\_ZINC\_TRANSPOR

REACTOME\_MITOTIC\_G2\_G2\_M\_PHASES

REACTOME\_MITOTIC\_G2\_G2\_M\_PHASES

SIGNALING\_BY\_CONSTitutively\_ACTIVE\_EGFR;REACTOME\_SIGNALING\_BY\_EGFR\_IN\_CANCER;REACTO

M;REACTOME\_METABOLISM\_OF\_LIPIDS\_AND\_LIPOPROTEINS

REACTOME\_G\_ALPHA\_Q\_SIGNALLING\_EVENTS;REACTOME\_GPCR\_DOWNSTREAM\_M

PATHWAY;REACTOME\_ER\_PHAGOSOME\_PATHWAY;REACTOME\_NEF\_MEDIATES\_DOWN\_M

ON\_ORGANIZATION;REACTOME\_APOPTOSIS;REACTOME\_APOPTOTIC\_EXECUTION\_PHASE

≡\_HEMOSTASIS

REACTOME\_SIGNALING\_BY\_ERBB4;REACTOME\_DOWNREGULATION\_OF\_ERBB2\_ERBB3\_SIK

HE\_ACTIVATION\_OF\_ARYLSULFATASES;REACTOME\_METABOLISM\_OF\_PROTEINS;REACTOM

TOME\_FACTORS\_INVOLVED\_IN\_MEGAKARYOCYTE\_DEVELOPMENT\_AND\_PLATELET\_PROD

TIC\_CELL;REACTOME\_TRANSMEMBRANE\_TRANSPORT\_OF\_SMALL\_MOLECULES;REACTOMI  
ATED\_AND\_SIGNALS\_SURVIVAL;REACTOME\_P75\_NTR\_RECEPTOR\_MEDIATED\_SIGNALLING;

:\_INTERFERON\_SIGNALING;REACTOME\_IMMUNE\_SYSTEM;REACTOME\_ADAPTIVE\_IMMUNE\_  
S;REACTOME\_INTERACTION\_BETWEEN\_L1\_AND\_ANKYRINS;REACTOME\_NEPHRIN\_INTERAC

\_I\_SIGNALLING\_EVENTS;REACTOME\_GPCR\_LIGAND\_BINDING

NE\_BODY\_METABOLISM;REACTOME\_TRANSCRIPTIONAL\_REGULATION\_OF\_WHITE\_ADIPOC

REACTOME\_MITOTIC\_G2\_G2\_M\_PHASES

REACTOME\_P130CAS\_LINKAGE\_TO\_MAPK\_SIGNALING\_FOR\_INTEGRINS;REACTOME\_GRB2\_SOS\_PI  
3K/ACT1/ALPHA\_BETA\_PATHWAYS;REACTOME\_APOPTOSIS;REACTOME\_INNATE\_IMMUNE\_SYSTEM;

REACTOME\_FGFR2;REACTOME\_SIGNALING\_BY\_FGFR\_MUTANTS;REACTOME\_FRS2\_MEDIATED\_CASCADE

REACTOME\_G\_VIA\_NRAGE\_NRIF\_AND\_NADE;REACTOME\_P75\_NTR\_RECEPTOR\_MEDIATED\_SIGNALLING  
IN THE IMMUNE\_SYSTEM

REACTOME\_G1\_S\_TRANSITION;REACTOME\_SYNTHESIS\_OF\_DNA;REACTOME\_MITOTIC\_G1

REACTOME\_S\_OLIGOPEPTIDES

REACTOME\_MITOTIC\_G2\_G2\_M\_PHASES

OS\_OLIGOPEPTIDES

ATED\_AND\_SIGNALS\_SURVIVAL;REACTOME\_P75\_NTR\_RECEPTOR\_MEDIATED\_SIGNALLING;

VI\_TYPE\_3\_PROMOTER

G\_VIA\_NRAGE\_NRIF\_AND\_NADE;REACTOME\_P75\_NTR\_RECEPTOR\_MEDIATED\_SIGNALLING

OS\_OLIGOPEPTIDES

BRANE;REACTOME\_ACTIVATION\_OF\_THE\_MRNA\_UPON\_BINDING\_OF\_THE\_CAP\_BINDING\_C  
\_MOLECULES;REACTOME\_METABOLISM\_OF\_CARBOHYDRATES

REGATION

\_BODY\_METABOLISM;REACTOME\_SYNTHESIS\_OF\_VERY\_LONG\_CHAIN\_FATTY\_ACYL\_COAS

CTOME\_APOPTOSIS

ÆEN\_A\_LYMPHOID\_AND\_A\_NON\_LYMPHOID\_CELL;REACTOME\_INTERFERON\_GAMMA\_SIGN/

REACTOME\_N\_GLYCAN\_TRIMMING\_IN\_THE\_ER\_AND\_CALNEXIN\_CALRETICULIN\_CYCLE  
REACTOME\_GPCRs;REACTOME\_CHEMOKINE\_RECEPTORS\_BIND\_CHEMOKINES;REACTOME\_GPC

OPENING\_K\_CHANNELS

REACTOME\_CTLA4\_INHIBITORY\_SIGNALING;REACTOME\_MITOTIC\_M\_M\_G1\_PHASES;REACTOME\_PLA

REACTOME\_GLUCOSE\_METABOLISM;REACTOME\_PLATELET\_ACTIVATION\_SIGNALING\_AND\_AGG



TIC\_CELL;REACTOME\_TRAFFICKING\_OF\_AMPA\_RECEPTORS

TIC\_CELL;REACTOME\_TRAFFICKING\_OF\_AMPA\_RECEPTORS;REACTOME\_TRAFFICKING\_OF

\_PATHWAY;REACTOME\_NEUROTRANSMITTER\_RECEPTOR\_BINDING\_AND\_DOWNSTREAM\_

OTIC\_COUPLING\_AND\_HEAT\_PRODUCTION\_BY\_UNCOUPLING\_PROTEINS\_

LL\_CYCLE\_MITOTIC;REACTOME\_CELL\_CYCLE\_CHECKPOINTS;REACTOME\_REGULATION\_OF

OS\_OLIGOPEPTIDES

.ING\_BY\_ERBB4;REACTOME\_SIGNALING\_BY\_ILS;REACTOME\_IL\_3\_5\_AND\_GM\_CSF\_SIGNALI

XES;REACTOME\_REGULATED\_PROTEOLYSIS\_OF\_P75NTR;REACTOME\_P75NTR\_SIGNALS\_V

AND\_LIPOPROTEINS;REACTOME\_FATTY\_ACID\_TRIACYLGLYCEROL\_AND\_KETONE\_BODY\_M

\_BINDING

ILISM;REACTOME\_GLYCOSAMINOGLYCAN\_METABOLISM;REACTOME\_A\_TETRASACCHARIDE

;TOME\_PHOSPHOLIPID\_METABOLISM;REACTOME\_PI\_METABOLISM;REACTOME\_GOLGI\_ASS

.ATELET\_ACTIVATION\_SIGNALING\_AND\_AGGREGATION

R\_MEDIATED\_SIGNALLING;REACTOME\_CELL\_CELL\_JUNCTION\_ORGANIZATION;REACTOME\_

ACTOME\_TRANSPORT\_OF\_INORGANIC\_CATIONS\_ANIONS\_AND\_AMINO\_ACIDS\_OLIGOPEPT

ATION

;REACTOME\_GENERIC\_TRANSCRIPTION\_PATHWAY;REACTOME\_NOTCH\_HLH\_TRANSCRIPT

TION\_AND\_REGULATION;REACTOME\_CELL\_CYCLE\_MITOTIC;REACTOME\_G1\_S\_TRANSITION

TIC\_CELL;REACTOME\_TRANSMEMBRANE\_TRANSPORT\_OF\_SMALL\_MOLECULES;REACTOME  
\_SLC\_MEDIATED\_TRANSMEMBRANE\_TRANSPORT;REACTOME\_TRANSPORT\_OF\_GLUCOSE\_

\_PRE\_INITIATION\_AND\_PROMOTER\_OPENING;REACTOME\_TRANSCRIPTION;REACTOME\_RN

ME\_ADAPTIVE\_IMMUNE\_SYSTEM

ORT;REACTOME\_RESPIRATORY\_ELECTRON\_TRANSPORT\_ATP\_SYNTHESIS\_BY\_CHEMIOSM  
;REACTOME\_REGULATION\_OF\_INSULIN\_SECRETION;REACTOME\_REGULATION\_OF\_INSULI

ED\_GLYCOSYLATION;REACTOME\_BIOSYNTHESIS\_OF\_THE\_N\_GLYCAN\_PRECURSOR\_DOLIC

OME\_GPCR\_LIGAND\_BINDING

IDDING;REACTOME\_SIGNALING\_BY\_EGFR\_IN\_CANCER;REACTOME\_NGF\_SIGNALLING\_VIA\_

TIC\_CELL;REACTOME\_ACTIVATION\_OF\_KAINATE\_RECEPTORS\_UPON\_Glutamate\_BINDING

OS\_OLIGOPEPTIDES

IN\_SULFATE\_HEPARIN\_HS\_GAG\_METABOLISM;REACTOME\_GLYCOSAMINOGLYCAN\_METABO

REPAIR

ULES;REACTOME\_TRANSPORT\_OF\_ORGANIC\_ANIONS

EEN\_A\_LYMPHOID\_AND\_A\_NON\_LYMPHOID\_CELL;REACTOME\_INTERFERON\_GAMMA\_SIGNA

OME\_EFFECTS\_OF\_PIP2\_HYDROLYSIS;REACTOME\_HEMOSTASIS;REACTOME\_PLATELET\_A  
OME\_EFFECTS\_OF\_PIP2\_HYDROLYSIS;REACTOME\_HEMOSTASIS;REACTOME\_PLATELET\_A

PIPS\_AT\_THE\_PLASMA\_MEMBRANE;REACTOME\_PI\_METABOLISM;REACTOME\_METABOLISM  
:\_OF\_REPLICATION\_INDEPENDENT\_DOUBLE\_STRAND\_BREAKS;REACTOME\_P53\_DEPENDEN

\_CONSTITUTIVELY\_ACTIVE\_EGFR;REACTOME\_GRB2\_EVENTS\_IN\_ERBB2\_SIGNALING;REAC  
ACTOME\_IMMUNE\_SYSTEM;REACTOME\_ADAPTIVE\_IMMUNE\_SYSTEM  
N\_SECRETION;REACTOME\_VOLTAGE\_GATED\_POTASSIUM\_CHANNELS;REACTOME\_POTASS

TIC\_CELL;REACTOME\_TRANSMEMBRANE\_TRANSPORT\_OF\_SMALL\_MOLECULES;REACTOMI

ON\_CASCADE;REACTOME\_HEMOSTASIS;REACTOME\_INNATE\_IMMUNE\_SYSTEM;REACTOMI

E



\_IMMUNE\_SYSTEM;REACTOME\_CLASS\_I\_MHC\_MEDIATED\_ANTIGEN\_PROCESSING\_PRESEN

THE\_ACTIVATION\_OF\_ARYLSULFATASES;REACTOME\_METABOLISM\_OF\_PROTEINS;REACTOM

SPORT\_OF\_MATURE\_TRANSCRIPT\_TO\_CYTOPLASM;REACTOME\_TRANSMEMBRANE\_TRANS

S;REACTOME\_IRON\_UPTAKE\_AND\_TRANSPORT;REACTOME\_TRANSFERRIN\_ENDOCYTOSIS

NLR\_SIGNALING\_PATHWAYS

TIGHT\_JUNCTION\_INTERACTIONS;REACTOME\_CELL\_JUNCTION\_ORGANIZATION;REACTOME

CYTE\_DEVELOPMENT\_AND\_PLATELET\_PRODUCTION;REACTOME\_HEMOSTASIS

NGF\_BY\_PDGF;REACTOME\_AXON\_GUIDANCE;REACTOME\_NCAM1\_INTERACTIONS;REACTOME

NE\_BODY\_METABOLISM;REACTOME\_TRANSCRIPTIONAL\_REGULATION\_OF\_WHITE\_ADIPOC

REACTOME\_APOPTOSIS;REACTOME\_APOPTOTIC\_EXECUTION\_PHASE  
TIC\_CELL;REACTOME\_ACETYLCHOLINE\_BINDING\_AND\_DOWNSTREAM\_EVENTS;REACTOME

MEDIATED\_EVENTS;REACTOME\_SIGNALING\_BY\_INSULIN\_RECEPTOR;REACTOME\_MTORC1\_I  
PORT;REACTOME\_LIPOPROTEIN\_METABOLISM;REACTOME\_CHYLOMICRON\_MEDIATED\_LIPI

TOME\_METABOLISM\_OF\_LIPIDS\_AND\_LIPOPROTEINS;REACTOME\_FATTY\_ACID\_TRIACYLGL

ME\_P75\_NTR\_RECEPTOR\_MEDIATED\_SIGNALLING;REACTOME\_SIGNALING\_BY\_GPCR;REAC

EACTOME\_MITOTIC\_G2\_G2\_M\_PHASES;REACTOME\_SIGNALLING\_BY\_NGF;REACTOME\_SIGI

IG\_PATHWAYS

ME\_ADAPTIVE\_IMMUNE\_SYSTEM

ACTOME\_IMMUNE\_SYSTEM;REACTOME\_ADAPTIVE\_IMMUNE\_SYSTEM  
ND\_BINDING

OME\_3\_UTR\_MEDIATED\_TRANSLATIONAL\_REGULATION;REACTOME\_METABOLISM\_OF\_MRN

BY\_CONSTITUTIVELY\_ACTIVE\_EGFR;REACTOME\_SIGNALING\_BY\_EGFR\_IN\_CANCER;REACTO

\_FGFR2;REACTOME\_SIGNALING\_BY\_FGFR3\_MUTANTS;REACTOME\_SIGNALING\_BY\_FGFR\_M

ION;REACTOME\_GPCR\_DOWNSTREAM\_SIGNALING;REACTOME\_G\_ALPHA\_I\_SIGNALLING\_E  
I\_SIGNALLING\_VIA\_NRAGE\_NRIF\_AND\_NADE;REACTOME\_P75\_NTR\_RECEPTOR\_MEDIATED

ATION

'\_CELLULAR\_PROTEINS;REACTOME\_INTEGRATION\_OF\_PROVIRUS;REACTOME\_APOBEC3G\_

SURFACE\_INTERACTIONS\_AT\_THE\_VASCULAR\_WALL;REACTOME\_PLATELET\_ADHESION\_TO

ATION

OLECULES;REACTOME\_REGULATION\_OF\_INSULIN\_SECRETION;REACTOME\_POTASSIUM\_CH

OS\_OLIGOPEPTIDES

PROTEASOME\_DEGRADATION

CELL\_CYCLE\_MITOTIC;REACTOME\_CELL\_CYCLE\_CHECKPOINTS;REACTOME\_REGULATION\_OF

OS\_OLIGOPEPTIDES

PHA\_S\_SIGNALLING\_EVENTS;REACTOME\_GPCR\_LIGAND\_BINDING

ND\_ORGANIC\_ACIDS\_METAL\_IONS\_AND\_AMINE\_COMPOUNDS;REACTOME\_AMINE\_COMPOUNDS

PTORS;REACTOME\_G\_ALPHA\_Q\_SIGNALLING\_EVENTS;REACTOME\_GPCR\_DOWNSTREAM\_SIGNALING;  
TOME\_INTEGRATION\_OF\_ENERGY\_METABOLISM;REACTOME\_OPIOID\_SIGNALLING;REACTOME

\_NCAM1\_INTERACTIONS;REACTOME\_NCAM\_SIGNALING\_FOR\_NEURITE\_OUT\_GROWTH

ATED\_AND\_SIGNALS\_SURVIVAL;REACTOME\_P75\_NTR\_RECEPTOR\_MEDIATED\_SIGNALLING;

G\_IN\_GOLGI;REACTOME\_KERATAN\_SULFATE\_BIOSYNTHESIS;REACTOME\_KERATAN\_SULF

NALING;REACTOME\_REGULATION\_OF\_IFNG\_SIGNALING;REACTOME\_INTERFERON\_GAMMA

ME\_P75\_NTR\_RECEPTOR\_MEDIATED\_SIGNALLING;REACTOME\_SIGNALING\_BY\_GPCR;REAC

\_MOLECULES;REACTOME\_METABOLISM\_OF\_CARBOHYDRATES

IA\_S\_SIGNALLING\_EVENTS;REACTOME\_GPCR\_LIGAND\_BINDING

RONAL\_SYSTEM;REACTOME\_CELL\_DEATH\_SIGNALLING\_VIA\_NRAGE\_NRIF\_AND\_NADE;REA  
N\_PHASE

1\_TRANSITION;REACTOME\_G1\_S\_TRANSITION;REACTOME\_POL\_SWITCHING;REACTOME\_S'

CTIONS;REACTOME\_SEMA3A\_PLEXIN\_REPULSION\_SIGNALING\_BY\_INHIBITING\_INTEGRIN\_A

\_LEADING\_TO\_GENERATION\_OF\_SECOND\_MESSENGERS;REACTOME\_SIGNALING\_BY\_THE

N\_AND\_INACTIVATION\_OF\_GLP1

.ELEMENTS

OMPLEX\_AND\_EIFS\_AND\_SUBSEQUENT\_BINDING\_TO\_43S;REACTOME\_METABOLISM\_OF\_PI

.ATELET\_ACTIVATION\_SIGNALING\_AND\_AGGREGATION



OF\_HIV\_LIFE\_CYCLE

↓\_GLYCAN\_ANTENNAE\_ELONGATION\_IN\_THE\_MEDIAL\_TRANS\_GOLGI

Y\_NOTCH1;REACTOME\_GENERIC\_TRANSCRIPTION\_PATHWAY;REACTOME\_RNA\_POL\_I\_TRA

SPORT\_OF\_SMALL\_MOLECULES;REACTOME\_MRNA\_PROCESSING;REACTOME\_TRANSPORT

SSION\_ACROSS\_CHEMICAL\_SYNAPSES;REACTOME\_NEURONAL\_SYSTEM;REACTOME\_SIGN  
CYCLE;REACTOME\_NGF\_SIGNALLING\_VIA\_TRKA\_FROM\_THE\_PLASMA\_MEMBRANE;REACTC

A\_INDEPENDENT\_GLUCOSE\_TRANSPORTERS

ROTEINS;REACTOME\_3\_UTR\_MEDIATED\_TRANSLATIONAL\_REGULATION

'IA\_NFKB;REACTOME\_NRF\_SIGNALS\_CELL\_DEATH\_FROM\_THE\_NUCLEUS;REACTOME\_NFK

T;REACTOME\_TRANSPORT\_OF\_INORGANIC\_CATIONS\_ANIONS\_AND\_AMINO\_ACIDS\_OLIGO



32\_G2\_M\_PHASES

G\_BY\_GPCR;REACTOME\_INTEGRATION\_OF\_ENERGY\_METABOLISM;REACTOME\_OPIOID\_SIK

NA;REACTOME\_TRANSCRIPTION;REACTOME\_MRNA\_3\_END\_PROCESSING;REACTOME\_CLE

;TOME\_G\_ALPHA1213\_SIGNALLING\_EVENTS;REACTOME\_GPCR\_DOWNSTREAM\_SIGNALING

.DOWNSTREAM\_SIGNALING\_EVENTS\_OF\_B\_CELL\_RECEPTOR\_BCR;REACTOME\_SIGNALING  
.DOWNSTREAM\_SIGNALING\_EVENTS\_OF\_B\_CELL\_RECEPTOR\_BCR;REACTOME\_SIGNALING

OMPLEX\_FORMATION;REACTOME\_CELL\_CYCLE\_MITOTIC;REACTOME\_CELL\_CYCLE\_CHECK

ACTOME\_CIRCADIANTOPRESSION\_OF\_EXPRESSION\_BY\_REV\_ERBA;REACTOME\_GENERIC

E\_NCAM\_SIGNALING\_FOR\_NEURITE\_OUT\_GROWTH  
ACTOME\_G\_ALPHA1213\_SIGNALLING\_EVENTS;REACTOME\_GPCR\_DOWNSTREAM\_SIGNALING

ACTOME\_PI3K\_EVENTS\_IN\_ERBB4\_SIGNALING;REACTOME\_PI3K\_EVENTS\_IN\_ERBB2\_SIGNALING



E\_NOTCH\_HLH\_TRANSCRIPTION\_PATHWAY;REACTOME\_SIGNALING\_BY\_NOTCH

CLE

POPROTEIN\_METABOLISM

TRANSCRIPTIONAL\_ACTIVITY;REACTOME\_GENERIC\_TRANSCRIPTION\_PATHWAY;REACTOME  
\_ACTIVATION;REACTOME\_TRAF6\_MEDIATED\_INDUCTION\_OF\_NFKB\_AND\_MAP\_KINASES\_UF



\_MEDIATED\_TRANSMEMBRANE\_TRANSPORT;REACTOME\_TRANSPORT\_OF\_INORGANIC\_CA

TRANSCRIPTIONAL\_REGULATION\_OF\_WHITE\_ADIPOCYTE\_DIFFERENTIATION

ASSOCIATED\_VESICLE\_BIOGENESIS;REACTOME\_METABOLISM\_OF\_LIPIDS\_AND\_LIPOPROTEINS

REACTOME\_EFFECTS\_OF\_PIP2\_HYDROLYSIS;REACTOME\_METABOLISM\_OF\_LIPIDS\_AND\_LI

OME\_PI3K\_EVENTS\_IN\_ERBB4\_SIGNALING;REACTOME\_PI3K\_EVENTS\_IN\_ERBB2\_SIGNALINC  
OME\_PI3K\_EVENTS\_IN\_ERBB4\_SIGNALING;REACTOME\_PI3K\_EVENTS\_IN\_ERBB2\_SIGNALINC

\_SIGNALING;REACTOME\_GPCR\_LIGAND\_BINDING

ALING;REACTOME\_INTERFERON\_ALPHA\_BETA\_SIGNALING;REACTOME\_INTERFERON\_SIGN,

.EACTOME\_GLUCOSE\_TRANSPORT;REACTOME\_METABOLISM\_OF\_CARBOHYDRATES;REAC

NSMITTER\_RECEPTOR\_BINDING\_AND\_DOWNSTREAM\_TRANSMISSION\_IN\_THE\_POSTSYNA

;RETION;REACTOME\_NCAM\_SIGNALING\_FOR\_NEURITE\_OUT\_GROWTH;REACTOME\_INHIBIT

TOME\_SIGNALING\_BY\_EGFR\_IN\_CANCER;REACTOME\_SHC1\_EVENTS\_IN\_ERBB4\_SIGNALING  
\_B\_CELL\_RECEPTOR\_BCR;REACTOME\_NGF\_SIGNALLING\_VIA\_TRKA\_FROM\_THE\_PLASMA\_|



ε\_HIGHLY\_CALCIIUM\_PERMEABLE\_POSTSYNAPTIC\_NICOTINIC\_ACETYLCHOLINE\_RECEPTOR

2\_SECRETIN\_FAMILY\_RECEPTORS;REACTOME\_GLCAGON\_TYPE\_LIGAND\_RECEPTORS;RE  
AND\_LIPOPROTEINS;REACTOME\_FATTY\_ACID\_TRIACYLGLYCEROL\_AND\_KETONE\_BODY\_M

Y\_BY\_PROTEINS\_THAT\_BIND\_AU\_RICH\_ELEMENTS;REACTOME\_DESTABILIZATION\_OF\_MRI

YLATION\_DEPENDENT\_MRNA\_DECAY;REACTOME\_METABOLISM\_OF\_RNA;REACTOME\_DEST

3

IE\_TO\_ELEVATED\_PLATELET\_CYTOSOLIC\_CA2\_;REACTOME\_TRANSMISSION\_ACROSS\_CHE

ESIS\_OF\_DNA;REACTOME\_MITOTIC\_G1\_G1\_S\_PHASES;REACTOME\_MITOTIC\_M\_M\_G1\_PHA

ACTOME\_G\_ALPHA1213\_SIGNALLING\_EVENTS;REACTOME\_GPCR\_DOWNSTREAM\_SIGNALING

\_SYSTEM;REACTOME\_CYTOKINE\_SIGNALING\_IN\_IMMUNE\_SYSTEM;REACTOME\_CLASS\_I\_M

;TOME\_G\_ALPHA1213\_SIGNALLING\_EVENTS;REACTOME\_GPCR\_DOWNSTREAM\_SIGNALING

;TOME\_G\_ALPHA1213\_SIGNALLING\_EVENTS;REACTOME\_GPCR\_DOWNSTREAM\_SIGNALING

IDES;REACTOME\_AMINO\_ACID\_AND\_OLIGOPEPTIDE\_SLC\_TRANSPORTERS

IDES;REACTOME\_AMINO\_ACID\_AND\_OLIGOPEPTIDE\_SLC\_TRANSPORTERS

ME\_RESOLUTION\_OF\_AP\_SITES\_VIA\_THE\_SINGLE\_NUCLEOTIDE\_REPLACEMENT\_PATHWAY  
ME\_RESOLUTION\_OF\_AP\_SITES\_VIA\_THE\_SINGLE\_NUCLEOTIDE\_REPLACEMENT\_PATHWAY

IN\_RESPONSE\_TO\_REPLICATION\_STRESS;REACTOME\_MEIOTIC\_SYNAPSIS;REACTOME\_G2  
ICATION;REACTOME\_ADP\_SIGNALLING\_THROUGH\_P2RY12;REACTOME\_GPCR\_LIGAND\_BIN

ME\_REGULATION\_OF\_INSULIN\_SECRETION;REACTOME\_SLC\_MEDIATED\_TRANSMEMBRANI

N\_TC\_NER;REACTOME\_SYNTHESIS\_OF\_DNA;REACTOME\_DNA\_REPAIR;REACTOME\_CHROM

ACTOME\_METABOLISM\_OF\_LIPIDS\_AND\_LIPOPROTEINS;REACTOME\_FATTY\_ACID\_TRIACYL

R\_OPENING;REACTOME\_MRNA\_PROCESSING;REACTOME\_TRANSCRIPTION;REACTOME\_NU

REACTOME\_KERATAN\_SULFATE\_KERATIN\_METABOLISM;REACTOME\_KERATAN\_SULFATE\_C  
REACTOME\_KERATAN\_SULFATE\_KERATIN\_METABOLISM;REACTOME\_KERATAN\_SULFATE\_C  
D\_METABOLISM;REACTOME\_METABOLISM\_OF\_LIPIDS\_AND\_LIPOPROTEINS

JCLEOSOMES\_AT\_THE\_CENTROMERE;REACTOME\_RNA\_POL\_I\_PROMOTER\_OPENING;REAC

TEROID\_HORMONES;REACTOME\_METABOLISM\_OF\_LIPIDS\_AND\_LIPOPROTEINS

IK\_EVENTS\_IN\_ERBB2\_SIGNALING;REACTOME\_NUCLEAR\_SIGNALING\_BY\_ERBB4

MBRANE\_TRANSPORT\_OF\_SMALL\_MOLECULES;REACTOME\_IRON\_UPTAKE\_AND\_TRANSPC

VA\_SIGNALING;REACTOME\_INTERFERON\_SIGNALING;REACTOME\_RIG\_I\_MDA5\_MEDIATED\_

AM\_SIGNAL\_TRANSDUCTION;REACTOME\_SIGNALING\_BY\_ILS;REACTOME\_REGULATION\_OI



ACTOME\_INTERFERON\_SIGNALING;REACTOME\_IMMUNE\_SYSTEM;REACTOME\_CYTOKINE\_S

ABOLISM\_OF\_LIPIDS\_AND\_LIOPROTEINS  
ABOLISM\_OF\_LIPIDS\_AND\_LIOPROTEINS

YTE\_DIFFERENTIATION

IODELLING\_OF\_PS;REACTOME\_GLYCEROPHOSPHOLIPID\_BIOSYNTHESIS;REACTOME\_MET/

ACTOME\_INNATE\_IMMUNE\_SYSTEM;REACTOME\_IMMUNE\_SYSTEM;REACTOME\_TOLL\_RECE

ROTEINS;REACTOME\_3\_UTR\_MEDIATED\_TRANSLATIONAL\_REGULATION

.ING\_BY\_EGFR\_IN\_CANCER;REACTOME\_SHC1\_EVENTS\_IN\_ERBB4\_SIGNALING;REACTOME\_

≡\_HIGHLY\_CALCIIUM\_PERMEABLE\_POSTSYNAPTIC\_NICOTINIC\_ACETYLCHOLINE\_RECEPTOF

\_MAPK\_TARGETS;REACTOME\_MYOGENESIS;REACTOME\_MAP\_KINASE\_ACTIVATION\_IN\_TLF

\_3\_PROMOTER;REACTOME\_RNA\_POL\_III\_TRANSCRIPTION\_TERMINATION;REACTOME\_RNA

ME\_CIRCADIANT\_CLOCK;REACTOME\_TRANSCRIPTIONAL\_REGULATION\_OF\_WHITE\_ADIPOC`

ACTOME\_CIRCADIANT\_REPRESSION\_OF\_EXPRESSION\_BY\_REV\_ERBA;REACTOME\_GENERIC

YTE\_DIFFERENTIATION

AND\_AMINO\_ACIDS\_OLIGOPEPTIDES;REACTOME\_AMINO\_ACID\_AND\_OLIGOPEPTIDE\_SLC\_1

G;REACTOME\_IOTROPIC\_ACTIVITY\_OF\_KAINATE\_RECEPTORS

G;REACTOME\_IOTROPIC\_ACTIVITY\_OF\_KAINATE\_RECEPTORS

ME\_NEUROTRANSMITTER\_RECEPTOR\_BINDING\_AND\_DOWNSTREAM\_TRANSMISSION\_IN\_T

EACTOME\_IMMUNE\_SYSTEM;REACTOME\_CYTOKINE\_SIGNALING\_IN\_IMMUNE\_SYSTEM  
ACTOME\_CIRCADIAN\_REPRESSION\_OF\_EXPRESSION\_BY\_REV\_ERBA;REACTOME\_GENERIC  
ACTOME\_CIRCADIAN\_REPRESSION\_OF\_EXPRESSION\_BY\_REV\_ERBA;REACTOME\_GENERIC

\_PRE\_NOTCH\_EXPRESSION\_AND\_PROCESSING;REACTOME\_NOTCH1\_INTRACELLULAR\_DO

.CTOME\_IMMUNE\_SYSTEM;REACTOME\_TOLL\_RECEPTOR\_CASCADES  
.CTOME\_IMMUNE\_SYSTEM;REACTOME\_TOLL\_RECEPTOR\_CASCADES

!\_RELEASE\_CYCLE

ANSCRIPTIONAL\_REGULATION\_OF\_WHITE\_ADIPOCYTE\_DIFFERENTIATION

NG;REACTOME\_SIGNALING\_BY\_GPCR;REACTOME\_G\_ALPHA1213\_SIGNALLING\_EVENTS;RE/

=\_MITOTIC\_CELL\_CYCLE;REACTOME\_APC\_C\_CDH1\_MEDIATED\_DEGRADATION\_OF\_CDC20\_

\_SIGNALING;REACTOME\_GPCR\_LIGAND\_BINDING  
)\_TRANSPORTERS;REACTOME\_IRON\_UPTAKE\_AND\_TRANSPORT  
)\_TRANSPORTERS;REACTOME\_IRON\_UPTAKE\_AND\_TRANSPORT

IDES;REACTOME\_AMINO\_ACID\_AND\_OLIGOPEPTIDE\_SLC\_TRANSPORTERS

DOWNSTREAM\_SIGNALING\_EVENTS\_OF\_B\_CELL\_RECEPTOR\_BCR;REACTOME\_SIGNALING

RESOLUTION\_OF\_AP\_SITES\_VIA\_THE\_SINGLE\_NUCLEOTIDE\_REPLACEMENT\_PATHWAY



CTOME\_HEMOSTASIS;REACTOME\_PLATELET\_ACTIVATION\_SIGNALING\_AND\_AGGREGATIO

ULTS;REACTOME\_PEROXISOMAL\_LIPID\_METABOLISM;REACTOME\_METABOLISM\_OF\_LIPIDS\_

32\_G2\_M\_PHASES

ACTOME\_CIRCADIANT\_REPRESSION\_OF\_EXPRESSION\_BY\_REV\_ERBA;REACTOME\_GENERIC

HWAYS;REACTOME\_INNATE\_IMMUNE\_SYSTEM;REACTOME\_IMMUNE\_SYSTEM;REACTOME\_C

GGREGATION

A\_INDEPENDENT\_GLUCOSE\_TRANSPORTERS

.DOWNSTREAM\_SIGNALING\_EVENTS\_OF\_B\_CELL\_RECEPTOR\_BCR;REACTOME\_SIGNALING

:\_LINKER\_SEQUENCE\_IS\_REQUIRED\_FOR\_GAG\_SYNTHESIS;REACTOME\_METABOLISM\_OF\_  
:\_LINKER\_SEQUENCE\_IS\_REQUIRED\_FOR\_GAG\_SYNTHESIS;REACTOME\_METABOLISM\_OF\_

ITS\_KINASE\_AND\_TRANSCRIPTION\_FACTOR\_ACTIVATION;REACTOME\_ERK\_MAPK\_TARGET

PORT\_OF\_INORGANIC\_CATIONS\_ANIONS\_AND\_AMINO\_ACIDS\_OLIGOPEPTIDES;REACTOME  
PORT\_OF\_INORGANIC\_CATIONS\_ANIONS\_AND\_AMINO\_ACIDS\_OLIGOPEPTIDES;REACTOME

ME\_PECAM1\_INTERACTIONS;REACTOME\_TCR\_SIGNALING;REACTOME\_DOWNSTREAM\_TCF

ANSCRIPTIONAL\_REGULATION\_OF\_WHITE\_ADIPOCYTE\_DIFFERENTIATION

I\_OF\_MTOR\_BY\_LKB1\_AMPK;REACTOME\_REGULATION\_OF\_RHEB\_GTPASE\_ACTIVITY\_BY\_A  
\_SIGNALING;REACTOME\_INTERFERON\_ALPHA\_BETA\_SIGNALING;REACTOME\_REGULATION

ENTS;REACTOME\_GPCR\_LIGAND\_BINDING

ACTOME\_SEMAPHORIN\_INTERACTIONS;REACTOME\_SEMA4D\_INDUCED\_CELL\_MIGRATION\_

ION\_PATHWAY;REACTOME\_RECEPTOR\_LIGAND\_BINDING\_INITIATES\_THE\_SECOND\_PROTE  
ION\_PATHWAY;REACTOME\_RECEPTOR\_LIGAND\_BINDING\_INITIATES\_THE\_SECOND\_PROTE

\_3\_PROMOTER;REACTOME\_RNA\_POL\_III\_TRANSCRIPTION\_TERMINATION;REACTOME\_RNA

;REACTOME\_SIGNALING\_BY\_GPCR;REACTOME\_AXON\_GUIDANCE;REACTOME\_G\_ALPHA12

SPORT\_OF\_SMALL\_MOLECULES;REACTOME\_MRNA\_PROCESSING;REACTOME\_TRANSPORT

EPULSION\_SIGNALING\_BY\_INHIBITING\_INTEGRIN\_ADHESION

ACTOME\_G\_ALPHA1213\_SIGNALLING\_EVENTS;REACTOME\_GPCR\_DOWNSTREAM\_SIGNALING

ACTOME\_PI3K\_EVENTS\_IN\_ERBB4\_SIGNALING;REACTOME\_PI3K\_EVENTS\_IN\_ERBB2\_SIGNALING

REACTOME\_SIGNALING\_BY\_NOTCH1;REACTOME\_REGULATED\_PROTEOLYSIS\_OF\_P75NTR;REACTOME

CELLULAR\_IUM\_CHANNELS

REACTOME\_CIRCADIAN\_REPRESSION\_OF\_EXPRESSION\_BY\_REV\_ERBA;REACTOME\_GENERIC

REACTOME\_HOMEOSTASIS;REACTOME\_HEMOSTASIS

CELLULAR\_ACTIONS  
CELLULAR\_ACTIONS

REACTOME\_INNATE\_IMMUNE\_SYSTEM;REACTOME\_ACTIVATED\_TLR4\_SIGNALLING;REACTOME\_IMMUNE

MODIFICATION

ON\_PATHWAY;REACTOME\_METABOLISM\_OF\_PROTEINS;REACTOME\_FORMATION\_OF\_FIBR

GF\_GLP1

GF\_GLP1

DS\_AND\_LIPOPROTEINS



ES;REACTOME\_IMMUNE\_SYSTEM;REACTOME\_ADAPTIVE\_IMMUNE\_SYSTEM  
EACTOME\_RAP1\_SIGNALLING;REACTOME\_PLATELET\_AGGREGATION\_PLUG\_FORMATION;R  
E\_HIGHLY\_CALCIUM\_PERMEABLE\_POSTSYNAPTIC\_NICOTINIC\_ACETYLCHOLINE\_RECEPTOR

EACTOME\_L1CAM\_INTERACTIONS;REACTOME\_SIGNAL\_TRANSDUCTION\_BY\_L1;REACTOME  
\_MUTANTS;REACTOME\_SIGNALING\_BY\_FGFR\_MUTANTS;REACTOME\_SIGNALING\_BY\_PDGF;

.TS\_AND\_ORGANIC\_ACIDS\_METAL\_IONS\_AND\_AMINE\_COMPOUNDS;REACTOME\_METAL\_ION

CEPTOR;REACTOME\_SIGNAL\_ATTENUATION;REACTOME\_SOS\_MEDIATED\_SIGNALLING;RE  
\_SIGNALLING;REACTOME\_G\_ALPHA\_I\_SIGNALLING\_EVENTS;REACTOME\_GPCR\_LIGAND\_BINDING

PORT\_OF\_GLUCOSE\_AND\_OTHER\_SUGARS\_BILE\_SALTS\_AND\_ORGANIC\_ACIDS\_METAL\_ION

EVENTS\_IN\_ERBB4\_SIGNALING;REACTOME\_INSULIN\_RECEPTOR\_SIGNALLING\_CASCADE;RE

PLEX

REACTOME\_GPCR\_LIGAND\_BINDING

EPULSION\_SIGNALING\_BY\_INHIBITING\_INTEGRIN\_ADHESION

.IN\_RESPONSE\_TO\_REPLICATION\_STRESS;REACTOME\_MEIOTIC\_SYNAPSIS;REACTOME\_G2

\_ANTIGEN\_PROCESSING\_PRESENTATION;REACTOME\_ANTIGEN\_PROCESSING\_UBIQUITINA`  
\_ANTIGEN\_PROCESSING\_PRESENTATION;REACTOME\_ANTIGEN\_PROCESSING\_UBIQUITINA`

E\_GABA\_A\_RECEPTOR\_ACTIVATION;REACTOME\_GABA\_RECEPTOR\_ACTIVATION;REACTOM

NRIF\_AND\_NADE;REACTOME\_P75\_NTR\_RECEPTOR\_MEDIATED\_SIGNALLING;REACTOME\_SI  
NRIF\_AND\_NADE;REACTOME\_P75\_NTR\_RECEPTOR\_MEDIATED\_SIGNALLING;REACTOME\_SI

\_OF\_RHEB\_GTPASE\_ACTIVITY\_BY\_AMPK;REACTOME\_PKB\_MEDIATED\_EVENTS;REACTOME

OMETAPHASE

BY\_EGFR\_IN\_CANCER;REACTOME\_PI3K\_EVENTS\_IN\_ERBB4\_SIGNALING;REACTOME\_PI3K\_E

ASACCHARIDE\_LINKER\_SEQUENCE\_IS\_REQUIRED\_FOR\_GAG\_SYNTHESIS;REACTOME\_ME

ME\_SPHINGOLIPID\_METABOLISM;REACTOME\_POST\_TRANSLATIONAL\_PROTEIN\_MODIFICAT

REACTOME\_G2\_M\_CHECKPOINTS;REACTOME\_G2\_M\_DNA\_DAMAGE\_CHECKPOINT

REACTOME\_G2\_M\_CHECKPOINTS;REACTOME\_G2\_M\_DNA\_DAMAGE\_CHECKPOINT

↑REAM\_SIGNALING\_OF\_ACTIVATED\_FGFR;REACTOME\_PHOSPHOLIPASE\_C\_MEDIATED\_CAS  
↑REAM\_SIGNALING\_OF\_ACTIVATED\_FGFR;REACTOME\_PHOSPHOLIPASE\_C\_MEDIATED\_CAS  
↑REAM\_SIGNALING\_OF\_ACTIVATED\_FGFR;REACTOME\_PHOSPHOLIPASE\_C\_MEDIATED\_CAS

↓A;REACTOME\_METABOLISM\_OF\_RNA;REACTOME\_INFLUENZA\_LIFE\_CYCLE;REACTOME\_INI

↓\_GLYCAN\_ANTENNAE\_ELONGATION\_IN\_THE\_MEDIAL\_TRANS\_GOLGI  
↓\_LIPID\_LINKED\_OLIGOSACCHARIDE\_ATTACHMENT\_AND\_TRANSFER\_TO\_A\_NASCENT\_PROTEIN

\_B\_CELL\_RECEPTOR\_BCR;REACTOME\_NGF\_SIGNALLING\_VIA\_TRKA\_FROM\_THE\_PLASMA\_|

JA;REACTOME\_METABOLISM\_OF\_RNA;REACTOME\_INFLUENZA\_LIFE\_CYCLE;REACTOME\_INI



REACTOME\_ADAPTIVE\_IMMUNE\_SYSTEM

ACTIVATION\_SIGNALING\_AND\_AGGREGATION

ACTIVATED\_HUMAN\_TAK1;REACTOME\_ACTIVATED\_TAK1\_MEDIATES\_P38\_MAPK\_ACTIVATION;RI

SSION\_ACROSS\_CHEMICAL\_SYNAPSES;REACTOME\_NEURONAL\_SYSTEM;REACTOME\_SIGN

!FACE\_INTERACTIONS;REACTOME\_SIGNALING\_BY\_PDGF;REACTOME\_GPVI\_MEDIATED\_ACT

IN;REACTOME\_DOWNSTREAM\_SIGNALING\_EVENTS\_OF\_B\_CELL\_RECEPTOR\_BCR;REACTO  
OMPLEX\_FORMATION;REACTOME\_CELL\_CYCLE\_MITOTIC;REACTOME\_CELL\_CYCLE\_CHECK

CTIVATION\_SIGNALING\_AND\_AGGREGATION  
CTIVATION\_SIGNALING\_AND\_AGGREGATION

;\_AND\_RECYCLING;REACTOME\_SIGNALING\_BY\_INSULIN\_RECEPTOR

CYCLASE;REACTOME\_PLATELET\_HOMEOSTASIS;REACTOME\_HEMOSTASIS

MEGAKARYOCYTE\_DEVELOPMENT\_AND\_PLATELET\_PRODUCTION;REACTOME\_HEMOSTASIS

REGULATION\_OF\_MTOR\_BY\_LKB1\_AMPK;REACTOME\_REGULATION\_OF\_RHEB\_GTPASE\_ACTIVITY\_BY\_A  
REGULATION\_OF\_MTOR\_BY\_LKB1\_AMPK;REACTOME\_REGULATION\_OF\_RHEB\_GTPASE\_ACTIVITY\_BY\_A

MUTANTS\_OF\_FGFR1;REACTOME\_SIGNALING\_BY\_FGFR\_MUTANTS;REACTOME\_AXON\_GUIDE  
MUTANTS\_OF\_FGFR1;REACTOME\_SIGNALING\_BY\_FGFR\_MUTANTS;REACTOME\_AXON\_GUIDE

ME\_RESOLUTION\_OF\_AP\_SITES\_VIA\_THE\_SINGLE\_NUCLEOTIDE\_REPLACEMENT\_PATHWAY

)\_DIGESTION\_MOBILIZATION\_AND\_TRANSPORT

\_MEDIATED\_TRANSMEMBRANE\_TRANSPORT;REACTOME\_TRANSPORT\_OF\_INORGANIC\_CA

GNAL\_ATTENUATION;REACTOME\_SHC\_MEDIATED\_SIGNALLING;REACTOME\_SHC\_RELATED

DOWNSTREAM\_SIGNALING\_EVENTS\_OF\_B\_CELL\_RECEPTOR\_BCR;REACTOME\_SIGNALING

TRANSMITTER\_RELEASE\_CYCLE;REACTOME\_ACETYLCHOLINE\_NEUROTRANSMITTER\_REL

OUT\_GROWTH;REACTOME\_L1CAM\_INTERACTIONS;REACTOME\_INTERACTION\_BETWEEN  
OUT\_GROWTH;REACTOME\_L1CAM\_INTERACTIONS;REACTOME\_INTERACTION\_BETWEEN  
OUT\_GROWTH;REACTOME\_L1CAM\_INTERACTIONS;REACTOME\_INTERACTION\_BETWEEN  
OUT\_GROWTH;REACTOME\_L1CAM\_INTERACTIONS;REACTOME\_INTERACTION\_BETWEEN

HOL\_LIPID\_LINKED\_OLIGOSACCHARIDE\_LLO\_AND\_TRANSFER\_TO\_A\_NASCENT\_PROTEIN

AM\_SIGNAL\_TRANSDUCTION;REACTOME\_SIGNALING\_BY\_ILS;REACTOME\_REGULATION\_O

REACTOME\_IMMUNE\_SYSTEM

POPROTEIN\_METABOLISM  
POPROTEIN\_METABOLISM

ATION\_PLUG\_FORMATION;REACTOME\_HEMOSTASIS;REACTOME\_PLATELET\_ACTIVATION\_9

OLINE\_NEUROTRANSMITTER\_RELEASE\_CYCLE;REACTOME\_METABOLISM\_OF\_LIPIDS\_AND\_I



REACTOME\_IMMUNE\_SYSTEM;REACTOME\_ADAPTIVE\_IMMUNE\_SYSTEM;REACTOME\_CYTO

IN;REACTOME\_DOWNSTREAM\_SIGNALING\_EVENTS\_OF\_B\_CELL\_RECEPTOR\_BCR;REACTO

FROM\_THE\_PLASMA\_MEMBRANE;REACTOME\_MHC\_CLASS\_II\_ANTIGEN\_PRESENTATION;RE

\_LIPOPROTEINS;REACTOME\_FATTY\_ACID\_TRIACYLGLYCEROL\_AND\_KETONE\_BODY\_METABO

ET\_HOMEOSTASIS;REACTOME\_PKB\_MEDIATED\_EVENTS;REACTOME\_SIGNALING\_BY\_INSUL  
ABOLISM\_OF\_LIPIDS\_AND\_LIPOPROTEINS

IN\_LIKE\_RECEPTORS;REACTOME\_G\_ALPHA\_Q\_SIGNALLING\_EVENTS;REACTOME\_GPCR\_DRUG  
ENT\_NEUROTRANSMITTER\_TRANSPORTERS;REACTOME\_AMINE\_COMPOUND\_SLC\_TRANSPORTERS

;REACTOME\_DNA\_REPLICATION;REACTOME\_MITOTIC\_PROMETAPHASE

\_DOWNSTREAM\_SIGNALING\_EVENTS\_OF\_B\_CELL\_RECEPTOR\_BCR;REACTOME\_SIGNALING

YNTHESES\_OF\_DNA;REACTOME\_MITOTIC\_G1\_G1\_S\_PHASES;REACTOME\_MITOTIC\_M\_M\_G1

REACTOME\_HORMONE\_SENSITIVE\_LIPASE\_HSL\_MEDIATED\_TRIACYLGLYCEROL\_HYDROLY  
;\_AND\_RECYCLING;REACTOME\_SIGNALING\_BY\_INSULIN\_RECEPTOR

;SING\_UBIQUITINATION\_PROTEASOME\_DEGRADATION;REACTOME\_VIF\_MEDIATED\_DEGRAI  
NT\_G1\_DNA\_DAMAGE\_RESPONSE;REACTOME\_REGULATION\_OF\_THE\_FANCONI\_ANEMIA\_P.

;REACTOME\_SIGNALING\_BY\_GPCR;REACTOME\_AXON\_GUIDANCE;REACTOME\_G\_ALPHA12  
;REACTOME\_SIGNALING\_BY\_GPCR;REACTOME\_AXON\_GUIDANCE;REACTOME\_G\_ALPHA12

√S;REACTOME\_TRANSLOCATION\_OF\_ZAP\_70\_TO\_IMMUNOLOGICAL\_SYNAPSE;REACTOME\_

.EACTOME\_TRANSPORT\_OF\_VITAMINS\_NUCLEOSIDES\_AND\_RELATED\_MOLECULES;REACT

SSION\_ACROSS\_CHEMICAL\_SYNAPSES;REACTOME\_NEURONAL\_SYSTEM;REACTOME\_SIGN

METABOLISM\_OF\_PROTEINS

ME\_RESOLUTION\_OF\_AP\_SITES\_VIA\_THE\_SINGLE\_NUCLEOTIDE\_REPLACEMENT\_PATHWAY

YTE\_DIFFERENTIATION

N\_TC\_NER;REACTOME\_SYNTHESIS\_OF\_DNA;REACTOME\_DNA\_REPAIR;REACTOME\_CHROM

E\_NCAM\_SIGNALING\_FOR\_NEURITE\_OUT\_GROWTH

CYCLE;REACTOME\_LATE\_PHASE\_OF\_HIV\_LIFE\_CYCLE

NE\_TRANSPORT;REACTOME\_TRANSPORT\_OF\_INORGANIC\_CATIONS\_ANIONS\_AND\_AMINO\_

E\_GPCR\_LIGAND\_BINDING

TELET\_ACTIVATION\_SIGNALING\_AND\_AGGREGATION

SIGNALING;REACTOME\_SIGNALING\_BY\_ERBB2;REACTOME\_SIGNALING\_BY\_EGFR\_IN\_CANCEI  
LYTIC\_CLEAVAGE\_OF\_NOTCH\_RECEPTOR;REACTOME\_SIGNALING\_BY\_NOTCH

≡\_HIGHLY\_CALCIIUM\_PERMEABLE\_POSTSYNAPTIC\_NICOTINIC\_ACETYLCHOLINE\_RECEPTOF

ME\_NEUROTRANSMITTER\_RECEPTOR\_BINDING\_AND\_DOWNSTREAM\_TRANSMISSION\_IN\_1



NS;REACTOME\_POST\_TRANSLATIONAL\_PROTEIN\_MODIFICATION;REACTOME\_SYNTHESIS\_

TEROID\_HORMONES;REACTOME\_METABOLISM\_OF\_LIPIDS\_AND\_LIPOPROTEINS

;TOME\_G\_ALPHA1213\_SIGNALLING\_EVENTS;REACTOME\_GPCR\_DOWNSTREAM\_SIGNALING

JND\_SLC\_TRANSPORTERS

JA;REACTOME\_METABOLISM\_OF\_RNA;REACTOME\_INFLUENZA\_LIFE\_CYCLE;REACTOME\_INI

\_YAP1\_AND\_WWTR1\_TAZ\_STIMULATED\_GENE\_EXPRESSION;REACTOME\_PRE\_NOTCH\_EXF  
\_YAP1\_AND\_WWTR1\_TAZ\_STIMULATED\_GENE\_EXPRESSION;REACTOME\_PRE\_NOTCH\_EXF  
\_YAP1\_AND\_WWTR1\_TAZ\_STIMULATED\_GENE\_EXPRESSION;REACTOME\_PRE\_NOTCH\_EXF  
SSION\_ACROSS\_CHEMICAL\_SYNAPSES;REACTOME\_NEURONAL\_SYSTEM;REACTOME\_SIGN

Y\_P\_TYPE\_ATPASES;REACTOME\_ION\_CHANNEL\_TRANSPORT;REACTOME\_SIGNALING\_BY\_

SPORT\_OF\_SMALL\_MOLECULES;REACTOME\_MRNA\_PROCESSING;REACTOME\_TRANSPORT  
SPORT\_OF\_SMALL\_MOLECULES;REACTOME\_MRNA\_PROCESSING;REACTOME\_TRANSPORT

ATION\_PLUG\_FORMATION;REACTOME\_HEMOSTASIS;REACTOME\_PLATELET\_ACTIVATION\_9

E\_IMMUNE\_SYSTEM;REACTOME\_TOLL\_RECEPTOR\_CASCADES;REACTOME\_ADAPTIVE\_IMM

ND\_POSTSYNAPTIC\_EVENTS;REACTOME\_POST\_NMDA\_RECEPTOR\_ACTIVATION\_EVENTS

\_ORGANIC\_ANION\_SLC\_TRANSPORTERS

E\_RNA\_POL\_II\_TRANSCRIPTION\_PRE\_INITIATION\_AND\_PROMOTER\_OPENING;REACTOME\_  
\_SIGNALLING\_THROUGH\_PI3KGAMMA;REACTOME\_G\_PROTEIN\_BETA\_GAMMA\_SIGNALLING

SSION;REACTOME\_NOTCH1\_INTRACELLULAR\_DOMAIN\_REGULATES\_TRANSCRIPTION;REAC  
SSION;REACTOME\_NOTCH1\_INTRACELLULAR\_DOMAIN\_REGULATES\_TRANSCRIPTION;REAC

ND\_MAP\_KINASES\_ACTIVATION\_MEDIATED\_BY\_TLR4\_SIGNALING\_REPERTOIRE;REACTOMI

\_ORGANIC\_ANION\_SLC\_TRANSPORTERS  
\_ORGANIC\_ANION\_SLC\_TRANSPORTERS

FROM\_THE\_PLASMA\_MEMBRANE;REACTOME\_MHC\_CLASS\_II\_ANTIGEN\_PRESENTATION;RE

JA;REACTOME\_METABOLISM\_OF\_RNA;REACTOME\_INFLUENZA\_LIFE\_CYCLE;REACTOME\_INI

SEMAPHORIN\_SIGNALING;REACTOME\_SEMAPHORIN\_INTERACTIONS;REACTOME\_SEMA4D\_INDUCTION;  
REACTOME\_GPCR\_LIGAND\_BINDING

REACTOME\_SIGNALING\_BY\_FGFR1\_FUSION\_MUTANTS;REACTOME\_SIGNALING\_BY\_FGFR\_MIMICRY;  
REACTOME\_SIGNALING\_BY\_FGFR1\_FUSION\_MUTANTS;REACTOME\_SIGNALING\_BY\_FGFR\_MIMICRY;  
REACTOME\_SIGNALING\_BY\_FGFR1\_FUSION\_MUTANTS;REACTOME\_SIGNALING\_BY\_FGFR\_MIMICRY

REACTOME\_NMDA\_RECEPTOR\_SIGNALLING;  
REACTOME\_NMDA\_RECEPTOR\_SIGNALLING

REACTOME\_GPIIb\_IIIa\_INTERACTIONS;REACTOME\_SIGNALING\_BY\_PDGF;REACTOME\_GPIIb\_IIIa\_MEDIATED\_ACTIVATION

REACTOME\_IMMUNE\_SYSTEM;REACTOME\_CYTOKINE\_SIGNALING\_IN\_IMMUNE\_SYSTEM

MEDIATED\_SIGNALLING;REACTOME\_PI3K\_CASCADE

AND\_LIPOPOTEINS;REACTOME\_FATTY\_ACID\_TRIACYLGLYCEROL\_AND\_KETONE\_BODY\_M  
AND\_LIPOPOTEINS;REACTOME\_FATTY\_ACID\_TRIACYLGLYCEROL\_AND\_KETONE\_BODY\_M

3;REACTOME\_G\_ALPHA\_S\_SIGNALLING\_EVENTS;REACTOME\_GPCR\_LIGAND\_BINDING

TIONS;REACTOME\_PYRUVATE\_METABOLISM;REACTOME\_HEMOSTASIS

RNA\_POL\_III\_TRANSCRIPTION;REACTOME\_MRNA\_CAPPING;REACTOME\_TRANSCRIPTION\_

IRAGE\_SIGNALS\_DEATH\_THROUGH\_JNK;REACTOME\_CELL\_DEATH\_SIGNALLING\_VIA\_NTAG  
ADE;REACTOME\_P75\_NTR\_RECEPTOR\_MEDIATED\_SIGNALLING;REACTOME\_SIGNALING\_BY

TOME\_IMMUNE\_SYSTEM;REACTOME\_CYTOKINE\_SIGNALING\_IN\_IMMUNE\_SYSTEM



;REACTOME\_GPCR\_DOWNSTREAM\_SIGNALING;REACTOME\_G\_ALPHA\_S\_SIGNALLING\_EVE  
E\_IMMUNE\_SYSTEM;REACTOME\_CYTOKINE\_SIGNALING\_IN\_IMMUNE\_SYSTEM

ASE;REACTOME\_SIGNALING\_BY\_GPCR;REACTOME\_INTEGRATION\_OF\_ENERGY\_METABOLIS

RESPONSE\_TO\_ELEVATED\_PLATELET\_CYTOSOLIC\_CA2\_;REACTOME\_TRANSCRIPTIONAL\_REG

HEMODYNAMIC\_HOMEOSTASIS;REACTOME\_HEMOSTASIS

TRANSCRIPTION\_COUPLED\_NER\_TC\_NER;REACTOME\_POL\_SWITCHING;REACTOME\_NUCLEOTIDE\_EX  
TRANSCRIPTION\_COUPLED\_NER\_TC\_NER;REACTOME\_POL\_SWITCHING;REACTOME\_NUCLEOTIDE\_EX  
TRANSCRIPTION\_COUPLED\_NER\_TC\_NER;REACTOME\_POL\_SWITCHING;REACTOME\_NUCLEOTIDE\_EX

;\_BY\_EGFR\_IN\_CANCER;REACTOME\_ANTIGEN\_ACTIVATES\_B\_CELL\_RECEPTOR\_LEADING\_

\_ORGANIC\_ANION\_SLC\_TRANSPORTERS

PEPTIDE1;REACTOME\_REGULATION\_OF\_INSULIN\_SECRETION;REACTOME\_CLASS\_B\_2\_SEC  
PEPTIDE1;REACTOME\_REGULATION\_OF\_INSULIN\_SECRETION;REACTOME\_CLASS\_B\_2\_SEC

IDE\_LIGAND\_BINDING\_RECEPTORS;REACTOME\_CLASS\_A1\_RHODOPSIN\_LIKE\_RECEPTORS

;TOME\_G\_ALPHA1213\_SIGNALLING\_EVENTS;REACTOME\_GPCR\_DOWNSTREAM\_SIGNALING

\_END\_PROCESSING;REACTOME\_CLEAVAGE\_OF\_GROWING\_TRANSCRIPT\_IN\_THE\_TERMIN

ME\_ADAPTIVE\_IMMUNE\_SYSTEM

LING;REACTOME\_G\_ALPHA\_S\_SIGNALLING\_EVENTS;REACTOME\_GPCR\_LIGAND\_BINDING

ESIS\_OF\_DNA;REACTOME\_MITOTIC\_G1\_G1\_S\_PHASES;REACTOME\_MITOTIC\_M\_M\_G1\_PHA

IMA\_SUBUNITS;REACTOME\_GABA\_B\_RECEPTOR\_ACTIVATION;REACTOME\_GABA\_RECEPTC  
IMA\_SUBUNITS;REACTOME\_GABA\_B\_RECEPTOR\_ACTIVATION;REACTOME\_GABA\_RECEPTC

\_SIGNALING;REACTOME\_G\_ALPHA\_I\_SIGNALLING\_EVENTS;REACTOME\_GPCR\_LIGAND\_BINI  
\_3\_PROMOTER;REACTOME\_RNA\_POL\_III\_TRANSCRIPTION\_TERMINATION;REACTOME\_RNA  
\_3\_PROMOTER;REACTOME\_RNA\_POL\_III\_TRANSCRIPTION\_TERMINATION;REACTOME\_RNA

ME\_SPHINGOLIPID\_METABOLISM;REACTOME\_POST\_TRANSLATIONAL\_PROTEIN\_MODIFICAT

ING\_APOPTOSIS;REACTOME\_APOPTOSIS

CE;REACTOME\_DNA\_REPLICATION;REACTOME\_MITOTIC\_PROMETAPHASE;REACTOME\_MEI

CTOME\_G\_ALPHA1213\_SIGNALLING\_EVENTS;REACTOME\_GPCR\_DOWNSTREAM\_SIGNALING

ANSCRIPTIONAL\_REGULATION\_OF\_WHITE\_ADIPOCYTE\_DIFFERENTIATION

:\_LINKER\_SEQUENCE\_IS\_REQUIRED\_FOR\_GAG\_SYNTHESIS;REACTOME\_METABOLISM\_OF\_

:ASACCHARIDE\_LINKER\_SEQUENCE\_IS\_REQUIRED\_FOR\_GAG\_SYNTHESIS;REACTOME\_ME

INDUCTION\_BY\_L1;REACTOME\_RECYCLING\_PATHWAY\_OF\_L1;REACTOME\_HEMOSTASIS  
INDUCTION\_BY\_L1;REACTOME\_RECYCLING\_PATHWAY\_OF\_L1;REACTOME\_HEMOSTASIS



Ξ\_DNA\_REPLICATION;REACTOME\_MITOTIC\_PROMETAPHASE

LYTIC\_CLEAVAGE\_OF\_NOTCH\_RECEPTOR;REACTOME\_SIGNALING\_BY\_NOTCH

REPLICATION;REACTOME\_HEMOSTASIS;REACTOME\_IMMUNE\_SYSTEM;REACTOME\_ADAPTI

ND\_TRANSPORT

RTERS;REACTOME\_METAL\_ION\_SLC\_TRANSPORTERS

OME\_PI3K\_EVENTS\_IN\_ERBB4\_SIGNALING;REACTOME\_PI3K\_EVENTS\_IN\_ERBB2\_SIGNALING

\_SIGNALING;REACTOME\_GPCR\_LIGAND\_BINDING;REACTOME\_THROMBIN\_SIGNALLING\_THR

ODULATION\_OF\_CELL\_SURFACE\_RECEPTORS\_BY\_RECRUITING\_THEM\_TO\_CLATHRIN\_ADA

SIGNALING;REACTOME\_SIGNALING\_BY\_ERBB2;REACTOME\_SIGNALING\_BY\_EGFR\_IN\_CANCEI

ME\_SPHINGOLIPID\_METABOLISM;REACTOME\_POST\_TRANSLATIONAL\_PROTEIN\_MODIFICAT

UCTION;REACTOME\_KINESINS;REACTOME\_HEMOSTASIS;REACTOME\_IMMUNE\_SYSTEM;RE

E\_GABA\_A\_RECEPTOR\_ACTIVATION;REACTOME\_GABA\_RECEPTOR\_ACTIVATION;REACTOM  
REACTOME\_TAK1\_ACTIVATES\_NFKB\_BY\_PHOSPHORYLATION\_AND\_ACTIVATION\_OF\_IKKS\_

\_SYSTEM;REACTOME\_CYTOKINE\_SIGNALING\_IN\_IMMUNE\_SYSTEM;REACTOME\_CLASS\_I\_MI  
CTIONS

YTE\_DIFFERENTIATION

ROVIDES\_LINKAGE\_TO\_MAPK\_SIGNALING\_FOR\_INTERGRINS\_;REACTOME\_INTEGRIN\_ALPH  
REACTOME\_IMMUNE\_SYSTEM

\DE;REACTOME\_PI\_3K\_CASCADE;REACTOME\_DOWNSTREAM\_SIGNALING\_OF\_ACTIVATED\_

;REACTOME\_SIGNALING\_BY\_GPCR;REACTOME\_AXON\_GUIDANCE;REACTOME\_G\_ALPHA12

\_G1\_S\_PHASES;REACTOME\_INHIBITION\_OF\_REPLICATION\_INITIATION\_OF\_DAMAGED\_DNA\_

REACTOME\_TAK1\_ACTIVATES\_NFKB\_BY\_PHOSPHORYLATION\_AND\_ACTIVATION\_OF\_IKKS\_

;REACTOME\_SIGNALING\_BY\_GPCR;REACTOME\_AXON\_GUIDANCE;REACTOME\_G\_ALPHA12

;COMPLEX\_AND\_EIFS\_AND\_SUBSEQUENT\_BINDING\_TO\_43S;REACTOME\_PEPTIDE\_CHAIN\_EL

;

ALING;REACTOME\_INTERFERON\_ALPHA\_BETA\_SIGNALING;REACTOME\_INTERFERON\_SIGN,

DR\_DOWNSTREAM\_SIGNALING;REACTOME\_G\_ALPHA\_I\_SIGNALLING\_EVENTS;REACTOME\_C

PLATELET\_HOMEOSTASIS;REACTOME\_PLATELET\_SENSITIZATION\_BY\_LDL;REACTOME\_DNA\_F

REGATION



GLUR2\_CONTAINING\_AMPA\_RECEPTORS

TRANSMISSION\_IN\_THE\_POSTSYNAPTIC\_CELL;REACTOME\_PLC\_BETA\_MEDIATED\_EVENTS

MITOTIC\_CELL\_CYCLE;REACTOME\_APC\_C\_CDH1\_MEDIATED\_DEGRADATION\_OF\_CDC20

NG;REACTOME\_IL\_RECEPTOR\_SHC\_SIGNALING;REACTOME\_FACTORS\_INVOLVED\_IN\_MEG.

'IA\_NFKB;REACTOME\_NRIF\_SIGNALS\_CELL\_DEATH\_FROM\_THE\_NUCLEUS;REACTOME\_NFK

METABOLISM

:\_LINKER\_SEQUENCE\_IS\_REQUIRED\_FOR\_GAG\_SYNTHESIS;REACTOME\_METABOLISM\_OF\_

OCIATED\_VESICLE\_BIOGENESIS;REACTOME\_METABOLISM\_OF\_LIPIDS\_AND\_LIPOPROTEINS

TIGHT\_JUNCTION\_INTERACTIONS;REACTOME\_CELL\_JUNCTION\_ORGANIZATION

IDES;REACTOME\_AMINO\_ACID\_AND\_OLIGOPEPTIDE\_SLC\_TRANSPORTERS

ION\_PATHWAY;REACTOME\_RECEPTOR\_LIGAND\_BINDING\_INITIATES\_THE\_SECOND\_PROTE

N;REACTOME\_MITOTIC\_G1\_G1\_S\_PHASES;REACTOME\_E2F\_MEDIATED\_REGULATION\_OF\_D

E\_GABA\_A\_RECEPTOR\_ACTIVATION;REACTOME\_GABA\_RECEPTOR\_ACTIVATION;REACTOM  
\_AND\_OTHER\_SUGARS\_BILE\_SALTS\_AND\_ORGANIC\_ACIDS\_METAL\_IONS\_AND\_AMINE\_COM

A\_POL\_I\_RNA\_POL\_III\_AND\_MITOCHONDRIAL\_TRANSCRIPTION;REACTOME\_RNA\_POL\_II\_PF

IOTIC\_COUPLING\_AND\_HEAT\_PRODUCTION\_BY\_UNCOUPLING\_PROTEINS\_  
N\_SECRETION\_BY\_ACETYLCHOLINE;REACTOME\_ADP\_SIGNALLING\_THROUGH\_P2RY1;REAC

HOL\_LIPID\_LINKED\_OLIGOSACCHARIDE\_LLO\_AND\_TRANSFER\_TO\_A\_NASCENT\_PROTEIN

TRKA\_FROM\_THE\_PLASMA\_MEMBRANE;REACTOME\_MHC\_CLASS\_II\_ANTIGEN\_PRESENTATI

G;REACTOME\_IONOTROPIC\_ACTIVITY\_OF\_KAINATE\_RECEPTORS

OLISM;REACTOME\_A\_TETRASACCHARIDE\_LINKER\_SEQUENCE\_IS\_REQUIRED\_FOR\_GAG\_S

ALING;REACTOME\_INTERFERON\_ALPHA\_BETA\_SIGNALING;REACTOME\_INTERFERON\_SIGN,

CTIVATION\_SIGNALING\_AND\_AGGREGATION  
CTIVATION\_SIGNALING\_AND\_AGGREGATION

4\_OF\_LIPIDS\_AND\_LIPOPROTEINS

NT\_G1\_DNA\_DAMAGE\_RESPONSE;REACTOME\_REGULATION\_OF\_THE\_FANCONI\_ANEMIA\_P

TOME\_SIGNALING\_BY\_EGFR\_IN\_CANCER;REACTOME\_SHC1\_EVENTS\_IN\_ERBB4\_SIGNALING

SIUM\_CHANNELS

E\_GABA\_A\_RECEPTOR\_ACTIVATION;REACTOME\_GABA\_RECEPTOR\_ACTIVATION;REACTOM

E\_IMMUNE\_SYSTEM;REACTOME\_TOLL\_RECEPTOR\_CASCADES;REACTOME\_ADAPTIVE\_IMM



NTATION

ME\_SPHINGOLIPID\_METABOLISM;REACTOME\_POST\_TRANSLATIONAL\_PROTEIN\_MODIFICAT

SPORT\_OF\_SMALL\_MOLECULES;REACTOME\_MRNA\_PROCESSING;REACTOME\_TRANSPORT

;\_AND\_RECYCLING;REACTOME\_SIGNALING\_BY\_INSULIN\_RECEPTOR

REACTOME\_SIGNALING\_BY\_TGF\_BETA\_RECEPTOR\_COMPLEX

REACTOME\_NCAM\_SIGNALING\_FOR\_NEURITE\_OUT\_GROWTH

REACTOME\_MYOTUBE\_DIFFERENTIATION

REACTOME\_HIGHLY\_CALCIIUM\_PERMEABLE\_POSTSYNAPTIC\_NICOTINIC\_ACETYLCHOLINE\_RECEPTOR

MEDIATED\_SIGNALLING;REACTOME\_PI3K\_CASCADE  
D\_TRANSPORT

YCEROL\_AND\_KETONE\_BODY\_METABOLISM

STOME\_G\_ALPHA1213\_SIGNALLING\_EVENTS;REACTOME\_GPCR\_DOWNSTREAM\_SIGNALING

VALING\_BY\_SCF\_KIT;REACTOME\_DEVELOPMENTAL\_BIOLOGY;REACTOME\_SIGNALING\_BY\_I

JA;REACTOME\_METABOLISM\_OF\_RNA;REACTOME\_INFLUENZA\_LIFE\_CYCLE;REACTOME\_INI

OME\_PI3K\_EVENTS\_IN\_ERBB4\_SIGNALING;REACTOME\_PI3K\_EVENTS\_IN\_ERBB2\_SIGNALING

MUTANTS;REACTOME\_FRS2\_MEDIATED\_CASCADE;REACTOME\_PI\_3K\_CASCADE;REACTOME

:EVENTS;REACTOME\_GPCR\_LIGAND\_BINDING  
\_SIGNALLING;REACTOME\_SIGNALING\_BY\_GPCR;REACTOME\_G\_ALPHA1213\_SIGNALLING\_E'

\_MEDIATED\_RESISTANCE\_TO\_HIV1\_INFECTI

O\_EXPOSED\_COLLAGEN;REACTOME\_BASIGIN\_INTERACTIONS;REACTOME\_INTEGRIN\_CELL

ANNELS;REACTOME\_INWARDLY\_RECTIFYING\_K\_CHANNELS

\_MITOTIC\_CELL\_CYCLE;REACTOME\_MITOTIC\_M\_M\_G1\_PHASES;REACTOME\_DNA\_REPLIC/

JND\_SLC\_TRANSPORTERS

\_SIGNALING;REACTOME\_GPCR\_LIGAND\_BINDING

ME\_NEUROTRANSMITTER\_RECEPTOR\_BINDING\_AND\_DOWNSTREAM\_TRANSMISSION\_IN\_T

REACTOME\_TAK1\_ACTIVATES\_NFKB\_BY\_PHOSPHORYLATION\_AND\_ACTIVATION\_OF\_IKKS\_

ACTE\_KERATIN\_METABOLISM;REACTOME\_GLYCOSAMINOGLYCAN\_METABOLISM;REACTOME\_  
\_SIGNALING;REACTOME\_INTERFERON\_ALPHA\_BETA\_SIGNALING;REACTOME\_REGULATION

ACTOME\_G\_ALPHA1213\_SIGNALLING\_EVENTS;REACTOME\_GPCR\_DOWNSTREAM\_SIGNALING

ACTOME\_P75\_NTR\_RECEPTOR\_MEDIATED\_SIGNALLING;REACTOME\_SIGNALING\_BY\_GPCR;I

YNTHESES\_OF\_DNA;REACTOME\_MITOTIC\_G1\_G1\_S\_PHASES;REACTOME\_MITOTIC\_M\_M\_G1

ADHESION

\_B\_CELL\_RECEPTOR\_BCR;REACTOME\_NGF\_SIGNALLING\_VIA\_TRKA\_FROM\_THE\_PLASMA\_|

ROTEINS;REACTOME\_3\_UTR\_MEDIATED\_TRANSLATIONAL\_REGULATION





TRANSCRIPTION;REACTOME\_NOTCH\_HLH\_TRANSCRIPTION\_PATHWAY;REACTOME\_TRANSCRI

\_OF\_MATURE\_MRNA\_DERIVED\_FROM\_AN\_INTRONLESS\_TRANSCRIPT;REACTOME\_SLC\_ME

ALING\_BY\_GPCR;REACTOME\_OPIOID\_SIGNALLING;REACTOME\_CA\_DEPENDENT\_EVENTS;R  
OME\_SIGNALING\_BY\_FGFR\_IN\_DISEASE;REACTOME\_NUCLEAR\_EVENTS\_KINASE\_AND\_TRAI



B\_IS\_ACTIVATED\_AND\_SIGNALS\_SURVIVAL;REACTOME\_CELL\_DEATH\_SIGNALLING\_VIA\_NR

PEPTIDES;REACTOME\_AMINO\_ACID\_AND\_OLIGOPEPTIDE\_SLC\_TRANSPORTERS



3NALLING;REACTOME\_CA\_DEPENDENT\_EVENTS;REACTOME\_DARPP\_32\_EVENTS;REACTOM

AVAGE\_OF\_GROWING\_TRANSCRIPT\_IN\_THE\_TERMINATION\_REGION\_

i

BY\_THE\_B\_CELL\_RECEPTOR\_BCR;REACTOME\_INSULIN\_RECEPTOR\_SIGNALLING\_CASCAI  
BY\_THE\_B\_CELL\_RECEPTOR\_BCR;REACTOME\_INSULIN\_RECEPTOR\_SIGNALLING\_CASCAI

(POINTS;REACTOME\_CDC6\_ASSOCIATION\_WITH\_THE\_ORC\_ORIGIN\_COMPLEX;REACTOME\_

:\_TRANSCRIPTION\_PATHWAY;REACTOME\_METABOLISM\_OF\_LIPIDS\_AND\_LIPOPROTEINS;R

i

3;REACTOME\_INSULIN\_RECEPTOR\_SIGNALLING\_CASCADE;REACTOME\_CELL\_SURFACE\_IN





E\_METABOLISM\_OF\_LIPIDS\_AND\_LIPOPROTEINS;REACTOME\_FATTY\_ACID\_TRIACYLGLYCEF  
PON\_TLR7\_8\_OR\_9\_ACTIVATION;REACTOME\_ADVANCED\_GLYCOSYLATION\_ENDPRODUCT\_



TIONS\_ANIONS\_AND\_AMINO\_ACIDS\_OLIGOPEPTIDES;REACTOME\_AMINO\_ACID\_AND\_OLIGC



POPROTEINS;REACTOME\_HORMONE\_SENSITIVE\_LIPASE\_HSL\_MEDIATED\_TRIACYLGLYCER

3;REACTOME\_INSULIN\_RECEPTOR\_SIGNALLING\_CASCADE;REACTOME\_CELL\_SURFACE\_IN  
3;REACTOME\_INSULIN\_RECEPTOR\_SIGNALLING\_CASCADE;REACTOME\_CELL\_SURFACE\_IN

ALING;REACTOME\_IMMUNE\_SYSTEM;REACTOME\_ADAPTIVE\_IMMUNE\_SYSTEM;REACTOME\_

TOME\_REGULATION\_OF\_GLUCOKINASE\_BY\_GLUCOKINASE\_REGULATORY\_PROTEIN

PTIC\_CELL;REACTOME\_PLC\_BETA\_MEDIATED\_EVENTS;REACTOME\_G\_PROTEIN\_ACTIVATION

ION\_OF\_INSULIN\_SECRETION\_BY\_ADRENALINE\_NORADRENALINE

3;REACTOME\_DOWNSTREAM\_SIGNALING\_EVENTS\_OF\_B\_CELL\_RECEPTOR\_BCR;REACTOM  
MEMBRANE;REACTOME\_SIGNALING\_BY\_FGFR\_IN\_DISEASE;REACTOME\_GASTRIN\_CREB\_SI



RS

REACTOME\_GPCR\_DOWNSTREAM\_SIGNALING;REACTOME\_G\_ALPHA\_S\_SIGNALLING\_EVENT;  
METABOLISM

RNA\_BY\_KSRP

STABILIZATION\_OF\_MRNA\_BY\_BRF1;REACTOME\_REGULATION\_OF\_MRNA\_STABILITY\_BY\_PRO

SYNAPTICAL\_SYNAPSES;REACTOME\_NEURONAL\_SYSTEM;REACTOME\_SIGNALING\_BY\_GPCR;RE

SES;REACTOME\_ASSEMBLY\_OF\_THE\_PRE\_REPLICATIVE\_COMPLEX;REACTOME\_DNA\_REPL

i

-IC\_MEDIATED\_ANTIGEN\_PROCESSING\_PRESENTATION



G1\_M\_CHECKPOINTS;REACTOME\_G2\_M\_DNA\_DAMAGE\_CHECKPOINT  
BINDING;REACTOME\_HEMOSTASIS;REACTOME\_PLATELET\_ACTIVATION\_SIGNALING\_AND\_AGGR

ATION;REACTOME\_TRANSPORT\_OF\_GLUCOSE\_AND\_OTHER\_SUGARS\_BILE\_SALTS

AND\_MITOCHONDRIAL\_MITOCHONDRIAL\_MAINTENANCE;REACTOME\_GLOBAL\_GENOMIC\_NER\_GG\_NER;REACTOME\_LAGGII

AND\_GLYCEROL\_AND\_KETONE\_BODY\_METABOLISM;REACTOME\_CIRCADIAN\_CLOCK;REACTOME

CLEOTIDE\_EXCISION\_REPAIR;REACTOME\_FORMATION\_OF\_RNA\_POL\_II\_ELONGATION\_COM

DEGRADATION;REACTOME\_GLYCOSAMINOGLYCAN\_METABOLISM;REACTOME\_SPHINGOLIPID

DEGRADATION;REACTOME\_GLYCOSAMINOGLYCAN\_METABOLISM;REACTOME\_SPHINGOLIPID

REACTOME\_MEIOTIC\_RECOMBINATION;REACTOME\_MEIOTIC\_SYNOPSIS;REACTOME\_AMYLOIDS

ORT;REACTOME\_TRANSFERRIN\_ENDOCYTOSIS\_AND\_RECYCLING;REACTOME\_SIGNALING\_E

INDUCTION\_OF\_IFN\_ALPHA\_BETA\_PATHWAYS;REACTOME\_HEMOSTASIS;REACTOME\_INNA

F\_SIGNALING\_BY\_CBL;REACTOME\_IL\_3\_5\_AND\_GM-CSF\_SIGNALING;REACTOME\_IMMUNE\_



SIGNALING\_IN\_IMMUNE\_SYSTEM

ABOLISM\_OF\_LIPIDS\_AND\_LIPOPROTEINS

PTOR\_CASCADES;REACTOME\_ADAPTIVE\_IMMUNE\_SYSTEM

.INSULIN\_RECEPTOR\_SIGNALLING\_CASCADE;REACTOME\_ARMS\_MEDIATED\_ACTIVATION;RI

RS;REACTOME\_PRESYNAPTIC\_NICOTINIC\_ACETYLCHOLINE\_RECEPTORS

\_CASCADE;REACTOME\_MAPK\_TARGETS\_NUCLEAR\_EVENTS\_MEDIATED\_BY\_MAP\_KINASES

\_POL\_III\_CHAIN\_ELONGATION

YTE\_DIFFERENTIATION

:\_TRANSCRIPTION\_PATHWAY;REACTOME\_NUCLEAR\_RECEPTOR\_TRANSCRIPTION\_PATHW

TRANSPORTERS

THE\_POSTSYNAPTIC\_CELL;REACTOME\_PLC\_BETA\_MEDIATED\_EVENTS;REACTOME\_G\_ALPHA

:\_TRANSCRIPTION\_PATHWAY;REACTOME\_METABOLISM\_OF\_LIPIDS\_AND\_LIPOPROTEINS;R  
:\_TRANSCRIPTION\_PATHWAY;REACTOME\_METABOLISM\_OF\_LIPIDS\_AND\_LIPOPROTEINS;R

MAIN\_REGULATES\_TRANSCRIPTION;REACTOME\_CIRCADIAN\_REPRESSION\_OF\_EXPRESSION

ACTOME\_GPCR\_DOWNSTREAM\_SIGNALING;REACTOME\_CELL\_EXTRACELLULAR\_MATRIX\_I

AND\_OTHER\_APC\_C\_CDH1\_TARGETED\_PROTEINS\_IN\_LATE\_MITOSIS\_EARLY\_G1;REACTOM

BY THE B CELL RECEPTOR BCR;REACTOME\_NGF\_SIGNALLING\_VIA\_TRKA\_FROM\_THE\_I



v

\_AND\_LIPOPROTEINS

:\_TRANSCRIPTION\_PATHWAY;REACTOME\_METABOLISM\_OF\_LIPIDS\_AND\_LIPOPROTEINS;R

CYTOKINE\_SIGNALING\_IN\_IMMUNE\_SYSTEM

BY\_THE\_B\_CELL\_RECEPTOR\_BCR;REACTOME\_NGF\_SIGNALLING\_VIA\_TRKA\_FROM\_THE\_I

LIPIDS\_AND\_LIPOPOTEINS;REACTOME\_METABOLISM\_OF\_CARBOHYDRATES;REACTOME\_  
LIPIDS\_AND\_LIPOPOTEINS;REACTOME\_METABOLISM\_OF\_CARBOHYDRATES;REACTOME\_

S;REACTOME\_TRANSMISSION\_ACROSS\_CHEMICAL\_SYNAPSES;REACTOME\_NEURONAL\_SY

\_METABOLISM\_OF\_CARBOHYDRATES

\_METABOLISM\_OF\_CARBOHYDRATES

R\_SIGNALING;REACTOME\_PHOSPHORYLATION\_OF\_CD3\_AND\_TCR\_ZETA\_CHAINS;REACTOM

.MPK;REACTOME\_METABOLISM\_OF\_LIPIDS\_AND\_LIPOPROTEINS;REACTOME\_FATTY\_ACID\_

I\_OF\_IFNA\_SIGNALING;REACTOME\_INTERFERON\_SIGNALING;REACTOME\_IL\_2\_SIGNALING;I

AND\_GROWTH\_CONE\_COLLAPSE

EXOLYTIC\_CLEAVAGE\_OF\_NOTCH\_RECEPTOR;REACTOME\_SIGNALING\_BY\_NOTCH  
EXOLYTIC\_CLEAVAGE\_OF\_NOTCH\_RECEPTOR;REACTOME\_SIGNALING\_BY\_NOTCH

\_POL\_III\_CHAIN\_ELONGATION

.13\_SIGNALLING\_EVENTS;REACTOME\_GPCR\_DOWNSTREAM\_SIGNALING;REACTOME\_SEMA

\_OF\_MATURE\_MRNA\_DERIVED\_FROM\_AN\_INTRONLESS\_TRANSCRIPT;REACTOME\_SLC\_ME

G;REACTOME\_DOWNSTREAM\_SIGNALING\_EVENTS\_OF\_B\_CELL\_RECEPTOR\_BCR;REACTOI

CTOME\_P75\_NTR\_RECEPTOR\_MEDIATED\_SIGNALLING;REACTOME\_RECEPTOR\_LIGAND\_BI

;\_TRANSCRIPTION\_PATHWAY;REACTOME\_METABOLISM\_OF\_LIPIDS\_AND\_LIPOPROTEINS;R

\_SYSTEM;REACTOME\_TOLL\_RECEPTOR\_CASCADES;REACTOME\_CYTOKINE\_SIGNALING\_IN

:IN\_CLOT\_CLOTTING\_CASCADE;REACTOME\_POST\_TRANSLATIONAL\_PROTEIN\_MODIFICATI



REACTOME\_HEMOSTASIS;REACTOME\_IMMUNE\_SYSTEM;REACTOME\_ADAPTIVE\_IMMUNE\_S  
RS;REACTOME\_PRESYNAPTIC\_NICOTINIC\_ACETYLCHOLINE\_RECEPTORS

\_HEMOSTASIS;REACTOME\_IMMUNE\_SYSTEM;REACTOME\_ADAPTIVE\_IMMUNE\_SYSTEM;REA  
REACTOME\_DOWNSTREAM\_SIGNAL\_TRANSDUCTION;REACTOME\_SIGNALING\_BY\_ILS;REAC

N\_SLC\_TRANSPORTERS

ACTOME\_IMMUNE\_SYSTEM;REACTOME\_CYTOKINE\_SIGNALING\_IN\_IMMUNE\_SYSTEM;REAC

JING

S\_AND\_AMINE\_COMPOUNDS;REACTOME\_NA\_CL\_DEPENDENT\_NEUROTRANSMITTER\_TRAN

:ACTOME\_ARMS\_MEDIATED\_ACTIVATION;REACTOME\_PROLONGED\_ERK\_ACTIVATION\_EVE

\_M\_CHECKPOINTS;REACTOME\_G2\_M\_DNA\_DAMAGE\_CHECKPOINT

TION\_PROTEASOME\_DEGRADATION  
TION\_PROTEASOME\_DEGRADATION

IE\_ION\_CHANNEL\_TRANSPORT;REACTOME\_LIGAND\_GATED\_ION\_CHANNEL\_TRANSPORT

GNALING\_BY\_GPCR;REACTOME\_AXON\_GUIDANCE;REACTOME\_G\_ALPHA\_Q\_SIGNALLING\_E  
GNALING\_BY\_GPCR;REACTOME\_AXON\_GUIDANCE;REACTOME\_G\_ALPHA\_Q\_SIGNALLING\_E

\_SIGNALING\_BY\_INSULIN\_RECEPTOR;REACTOME\_PI3K\_CASCADE

:EVENTS\_IN\_ERBB2\_SIGNALING;REACTOME\_ANTIGEN\_ACTIVATES\_B\_CELL\_RECEPTOR\_LEA

ETABOLISM\_OF\_CARBOHYDRATES

TION;REACTOME\_METABOLISM\_OF\_LIPIDS\_AND\_LIPOPROTEINS

SCADE;REACTOME\_SHC\_MEDIATED\_CASCADE;REACTOME\_SIGNALING\_BY\_INSULIN\_RECEF  
SCADE;REACTOME\_SHC\_MEDIATED\_CASCADE;REACTOME\_SIGNALING\_BY\_INSULIN\_RECEF  
SCADE;REACTOME\_SHC\_MEDIATED\_CASCADE;REACTOME\_SIGNALING\_BY\_INSULIN\_RECEF  
FLUENZA\_VIRAL\_RNA\_TRANSCRIPTION\_AND\_REPLICATION;REACTOME\_NONSENSE\_MEDIA

MEMBRANE;REACTOME\_SIGNALING\_BY\_FGFR\_IN\_DISEASE;REACTOME\_GASTRIN\_CREB\_SI

FLUENZA\_VIRAL\_RNA\_TRANSCRIPTION\_AND\_REPLICATION;REACTOME\_NONSENSE\_MEDIA





ALIGNING\_BY\_GPCR;REACTOME\_INTEGRATION\_OF\_ENERGY\_METABOLISM;REACTOME\_OPIOID

ACTIVATION\_CASCADE;REACTOME\_AXON\_GUIDANCE;REACTOME\_NCAM1\_INTERACTIONS;REACTOME

ME\_ACTIVATION\_OF\_NF\_KAPPAB\_IN\_B\_CELLS;REACTOME\_SIGNALING\_BY\_THE\_B\_CELL\_R  
(POINTS;REACTOME\_CDC6\_ASSOCIATION\_WITH\_THE\_ORC\_ORIGIN\_COMPLEX;REACTOME\_

.MPK;REACTOME\_METABOLISM\_OF\_LIPIDS\_AND\_LIPOPROTEINS;REACTOME\_FATTY\_ACID\_  
.MPK;REACTOME\_METABOLISM\_OF\_LIPIDS\_AND\_LIPOPROTEINS;REACTOME\_FATTY\_ACID\_

ANCE;REACTOME\_NCAM\_SIGNALING\_FOR\_NEURITE\_OUT\_GROWTH;REACTOME\_FRS2\_ME  
ANCE;REACTOME\_NCAM\_SIGNALING\_FOR\_NEURITE\_OUT\_GROWTH;REACTOME\_FRS2\_ME

TIONS\_ANIONS\_AND\_AMINO\_ACIDS\_OLIGOPEPTIDES;REACTOME\_AMINO\_ACID\_AND\_OLIGC

\_EVENTS

BY\_THE\_B\_CELL\_RECEPTOR\_BCR;REACTOME\_NGF\_SIGNALLING\_VIA\_TRKA\_FROM\_THE\_I

EASE\_CYCLE;REACTOME\_NOREPINEPHRINE\_NEUROTRANSMITTER\_RELEASE\_CYCLE;REAC

L1\_AND\_ANKYRINS;REACTOME\_NEPHRIN\_INTERACTIONS;REACTOME\_APOPTOSIS;REACT  
L1\_AND\_ANKYRINS;REACTOME\_NEPHRIN\_INTERACTIONS;REACTOME\_APOPTOSIS;REACT  
L1\_AND\_ANKYRINS;REACTOME\_NEPHRIN\_INTERACTIONS;REACTOME\_APOPTOSIS;REACT  
L1\_AND\_ANKYRINS;REACTOME\_NEPHRIN\_INTERACTIONS;REACTOME\_APOPTOSIS;REACT

F\_SIGNALING\_BY\_CBL;REACTOME\_IL\_3\_5\_AND\_GM-CSF\_SIGNALING;REACTOME\_IMMUNE\_

SIGNALING\_AND\_AGGREGATION

\_IPOPTEINS



KINE\_SIGNALING\_IN\_IMMUNE\_SYSTEM

ME\_ACTIVATION\_OF\_NF\_KAPPAB\_IN\_B\_CELLS;REACTOME\_SIGNALING\_BY\_THE\_B\_CELL\_R

:ACTOME\_RETROGRADE\_NEUROTROPHIN\_SIGNALLING;REACTOME\_EGFR\_DOWNREGULAT

OLISM;REACTOME\_CIRCADIAN\_CLOCK

.IN\_RECEPTOR;REACTOME\_HEMOSTASIS;REACTOME\_PI3K\_CASCADE

DWNSTREAM\_SIGNALING;REACTOME\_G\_ALPHA\_I\_SIGNALLING\_EVENTS;REACTOME\_TAK1\_  
PORTERS

i\_BY\_THE\_B\_CELL\_RECEPTOR\_BCR;REACTOME\_NGF\_SIGNALLING\_VIA\_TRKA\_FROM\_THE\_I

\_PHASES;REACTOME\_CHROMOSOME\_MAINTENANCE;REACTOME\_LAGGING\_STRAND\_SYN

SIS;REACTOME\_LIPID\_DIGESTION\_MOBILIZATION\_AND\_TRANSPORT;REACTOME\_SIGNALIN

DATION\_OF\_APOBEC3G

ATHWAY;REACTOME\_FANCONI\_ANEMIA\_PATHWAY;REACTOME\_DOUBLE\_STRAND\_BREAK\_

13\_SIGNALLING\_EVENTS;REACTOME\_GPCR\_DOWNSTREAM\_SIGNALING;REACTOME\_SEMA  
13\_SIGNALLING\_EVENTS;REACTOME\_GPCR\_DOWNSTREAM\_SIGNALING;REACTOME\_SEMA

GENERATION\_OF\_SECOND\_MESSENGER\_MOLECULES;REACTOME\_PD1\_SIGNALING;REACT

OME\_TRANSPORT\_OF\_ORGANIC\_ANIONS

ALING\_BY\_GPCR;REACTOME\_INTEGRATION\_OF\_ENERGY\_METABOLISM;REACTOME\_OPIOI

1OSOME\_MAINTENANCE;REACTOME\_GLOBAL\_GENOMIC\_NER\_GG\_NER;REACTOME\_LAGGII

\_ACIDS\_OLIGOPEPTIDES;REACTOME\_AMINO\_ACID\_AND\_OLIGOPEPTIDE\_SLC\_TRANSPORTI

R;REACTOME\_PI3K\_EVENTS\_IN\_ERBB4\_SIGNALING;REACTOME\_PI3K\_EVENTS\_IN\_ERBB2\_S

RS

THE\_POSTSYNAPTIC\_CELL;REACTOME\_PLC\_BETA\_MEDIATED\_EVENTS;REACTOME\_G\_ALPHA



OF\_GLYCOSYLPHOSPHATIDYLINOSITOL\_GPI

FLUENZA\_VIRAL\_RNA\_TRANSCRIPTION\_AND\_REPLICATION;REACTOME\_NONSENSE\_MEDIA

PRESSION\_AND\_PROCESSING;REACTOME\_NOTCH1\_INTRACELLULAR\_DOMAIN\_REGULATES  
PRESSION\_AND\_PROCESSING;REACTOME\_NOTCH1\_INTRACELLULAR\_DOMAIN\_REGULATES  
PRESSION\_AND\_PROCESSING;REACTOME\_NOTCH1\_INTRACELLULAR\_DOMAIN\_REGULATES  
ALING\_BY\_GPCR;REACTOME\_INTEGRATION\_OF\_ENERGY\_METABOLISM;REACTOME\_OPIOI

NOTCH;REACTOME\_HEMOSTASIS

\_OF\_MATURE\_MRNA\_DERIVED\_FROM\_AN\_INTRONLESS\_TRANSCRIPT;REACTOME\_SLC\_ME  
\_OF\_MATURE\_MRNA\_DERIVED\_FROM\_AN\_INTRONLESS\_TRANSCRIPT;REACTOME\_SLC\_ME

SIGNALING\_AND\_AGGREGATION

UNE\_SYSTEM;REACTOME\_PLATELET\_ACTIVATION\_SIGNALING\_AND\_AGGREGATION

MRNA\_PROCESSING;REACTOME\_MRNA\_SPLICING;REACTOME\_MRNA\_SPLICING\_MINOR\_PATHWAYS;REACTOME\_METABOLISM\_OF\_LIPIDS\_AND\_LIPOPROTEINS;REACTOME\_HEMOSTASIS;REA

CTOME\_CIRCADIAN\_REPRESSION\_OF\_EXPRESSION\_BY\_REV\_ERBA;REACTOME\_SIGNALING  
CTOME\_CIRCADIAN\_REPRESSION\_OF\_EXPRESSION\_BY\_REV\_ERBA;REACTOME\_SIGNALING

E\_MYD88\_MAL\_CASCADE\_INITIATED\_ON\_PLASMA\_MEMBRANE;REACTOME\_INNATE\_IMMUN

:ACTOME\_RETROGRADE\_NEUROTROPHIN\_SIGNALLING;REACTOME\_EGFR\_DOWNREGULAT

FLUENZA\_VIRAL\_RNA\_TRANSCRIPTION\_AND\_REPLICATION;REACTOME\_NONSENSE\_MEDIA

ICED\_CELL\_MIGRATION\_AND\_GROWTH\_CONE\_COLLAPSE

UTANTS;REACTOME\_SIGNALING\_BY\_PDGF;REACTOME\_DOWNSTREAM\_SIGNAL\_TRANSDUC  
UTANTS;REACTOME\_SIGNALING\_BY\_PDGF;REACTOME\_DOWNSTREAM\_SIGNAL\_TRANSDUC  
UTANTS;REACTOME\_SIGNALING\_BY\_PDGF;REACTOME\_DOWNSTREAM\_SIGNAL\_TRANSDUC

IVATION\_CASCADE;REACTOME\_AXON\_GUIDANCE;REACTOME\_NCAM1\_INTERACTIONS;REA/

ETABOLISM  
ETABOLISM

\_COUPLED\_NER\_TC\_NER;REACTOME\_RNA\_POL\_II\_TRANSCRIPTION\_PRE\_INITIATION\_AND\_

E\_NRIF\_AND\_NADE;REACTOME\_P75\_NTR\_RECEPTOR\_MEDIATED\_SIGNALLING;REACTOME  
\_GPCR;REACTOME\_G\_ALPHA1213\_SIGNALLING\_EVENTS;REACTOME\_GPCR\_DOWNSTREAM



NTS;REACTOME\_GPCR\_LIGAND\_BINDING

3M;REACTOME\_CELL\_CYCLE\_MITOTIC;REACTOME\_GLYCOLYSIS;REACTOME\_OPIOID

REGULATION\_OF\_WHITE\_ADIPOCYTE\_DIFFERENTIATION;REACTOME\_HEMOSTASIS;REACTOME

REPAIR;REACTOME\_REPAIR\_SYNTHESIS\_FOR\_GAP\_FILLING\_BY\_DNA\_POL\_IN\_TC\_



RETIN\_FAMILY\_RECEPTORS;REACTOME\_G\_LUCAGON\_TYPE\_LIGAND\_RECEPTORS;REACTO  
RETIN\_FAMILY\_RECEPTORS;REACTOME\_G\_LUCAGON\_TYPE\_LIGAND\_RECEPTORS;REACTO

;REACTOME\_G\_ALPHA\_Q\_SIGNALLING\_EVENTS;REACTOME\_GPCR\_DOWNSTREAM\_SIGNAL

ATION\_REGION\_

SES;REACTOME\_ASSEMBLY\_OF\_THE\_PRE\_REPLICATIVE\_COMPLEX;REACTOME\_DNA\_REPL

OR\_ACTIVATION;REACTOME\_POTASSIUM\_CHANNELS;REACTOME\_INWARDLY\_RECTIFYING\_  
OR\_ACTIVATION;REACTOME\_POTASSIUM\_CHANNELS;REACTOME\_INWARDLY\_RECTIFYING\_

DING

\_POL\_III\_CHAIN\_ELONGATION

\_POL\_III\_CHAIN\_ELONGATION

ION;REACTOME\_METABOLISM\_OF\_LIPIDS\_AND\_LIPOPROTEINS

IOTIC\_SYNOPSIS

i

\_CARBOHYDRATES

ΓABOLISM\_OF\_CARBOHYDRATES



√E\_IMMUNE\_SYSTEM

3;REACTOME\_INSULIN\_RECEPTOR\_SIGNALLING\_CASCADE;REACTOME\_CELL\_SURFACE\_IN

ROUGH\_PROTEINASE\_ACTIVATED\_RECEPTORS\_PARS;REACTOME\_HEMOSTASIS;REACTOM

PTERS;REACTOME\_IMMUNOREGULATORY\_INTERACTIONS\_BETWEEN\_A\_LYMPHOID\_AND\_

2;REACTOME\_PI3K\_EVENTS\_IN\_ERBB4\_SIGNALING;REACTOME\_PI3K\_EVENTS\_IN\_ERBB2\_S

ION;REACTOME\_METABOLISM\_OF\_LIPIDS\_AND\_LIPOPROTEINS

ACTOME\_ADAPTIVE\_IMMUNE\_SYSTEM

IE\_ION\_CHANNEL\_TRANSPORT;REACTOME\_LIGAND\_GATED\_ION\_CHANNEL\_TRANSPORT  
\_COMPLEX;REACTOME\_MAP\_KINASE\_ACTIVATION\_IN\_TLR\_CASCADE;REACTOME\_JNK\_C\_JI

-IC\_MEDIATED\_ANTIGEN\_PROCESSING\_PRESENTATION

IAIIB\_BETA3\_SIGNALING;REACTOME\_AXON\_GUIDANCE;REACTOME\_NCAM\_SIGNALING\_FOR

FGFR;REACTOME\_PHOSPHOLIPASE\_C\_MEDIATED\_CASCADE;REACTOME\_SHC\_MEDIATED\_

13\_SIGNALLING\_EVENTS;REACTOME\_GPCR\_DOWNSTREAM\_SIGNALING;REACTOME\_SEMA

\_BY\_RB1\_E2F1;REACTOME\_DNA\_REPLICATION;REACTOME\_E2F\_MEDIATED\_REGULATION\_C

\_COMPLEX;REACTOME\_MAP\_KINASE\_ACTIVATION\_IN\_TLR\_CASCADE;REACTOME\_JNK\_C\_JI

.13\_SIGNALLING\_EVENTS;REACTOME\_GPCR\_DOWNSTREAM\_SIGNALING;REACTOME\_ACTIV

\_ONGATION;REACTOME\_METABOLISM\_OF\_PROTEINS;REACTOME\_3\_UTR\_MEDIATED\_TRAN

ALING;REACTOME\_IMMUNE\_SYSTEM;REACTOME\_ADAPTIVE\_IMMUNE\_SYSTEM;REACTOME\_

3PCR\_LIGAND\_BINDING

REPLICATION;REACTOME\_HEMOSTASIS;REACTOME\_MITOTIC\_PROMETAPHASE;REACTOME\_



;REACTOME\_G\_PROTEIN\_ACTIVATION;REACTOME\_GPCR\_DOWNSTREAM\_SIGNALING;REAC

AND\_OTHER\_APC\_C\_CDH1\_TARGETED\_PROTEINS\_IN\_LATE\_MITOSIS\_EARLY\_G1;REACTOM

AKARYOCYTE\_DEVELOPMENT\_AND\_PLATELET\_PRODUCTION;REACTOME\_REGULATION\_OI

B\_IS\_ACTIVATED\_AND\_SIGNALS\_SURVIVAL;REACTOME\_CELL\_DEATH\_SIGNALLING\_VIA\_NR

\_CARBOHYDRATES





EXOLYTIC\_CLEAVAGE\_OF\_NOTCH\_RECEPTOR;REACTOME\_SIGNALING\_BY\_NOTCH

DNA\_REPLICATION;REACTOME\_G1\_S\_SPECIFIC\_TRANSCRIPTION

IE\_ION\_CHANNEL\_TRANSPORT;REACTOME\_LIGAND\_GATED\_ION\_CHANNEL\_TRANSPORT

AMPOUNDS;REACTOME\_AMINE\_COMPOUND\_SLC\_TRANSPORTERS;REACTOME\_METABOLISM

RE\_TRANSCRIPTION\_EVENTS;REACTOME\_RNA\_POL\_III\_TRANSCRIPTION\_INITIATION\_FROM

ACTOME\_GPCR\_DOWNSTREAM\_SIGNALING;REACTOME\_SIGNAL\_AMPLIFICATION;REACTOME

ION;REACTOME\_RETROGRADE\_NEUROTROPHIN\_SIGNALLING;REACTOME\_EGFR\_DOWNRE

YNTHESES;REACTOME\_AXON\_GUIDANCE;REACTOME\_ACTIVATION\_OF\_RAC;REACTOME\_SIK

ALING;REACTOME\_IMMUNE\_SYSTEM;REACTOME\_ADAPTIVE\_IMMUNE\_SYSTEM;REACTOME\_

ATHWAY;REACTOME\_FANCONI\_ANEMIA\_PATHWAY;REACTOME\_DOUBLE\_STRAND\_BREAK\_

3;REACTOME\_DOWNSTREAM\_SIGNALING\_EVENTS\_OF\_B\_CELL\_RECEPTOR\_BCR;REACTOM

IE\_ION\_CHANNEL\_TRANSPORT;REACTOME\_LIGAND\_GATED\_ION\_CHANNEL\_TRANSPORT

UNE\_SYSTEM;REACTOME\_PLATELET\_ACTIVATION\_SIGNALING\_AND\_AGGREGATION



TON;REACTOME\_METABOLISM\_OF\_LIPIDS\_AND\_LIPOPROTEINS

\_OF\_MATURE\_MRNA\_DERIVED\_FROM\_AN\_INTRONLESS\_TRANSCRIPT;REACTOME\_SLC\_ME

RS



FLUENZA\_VIRAL\_RNA\_TRANSCRIPTION\_AND\_REPLICATION;REACTOME\_NONSENSE\_MEDIA

3;REACTOME\_INSULIN\_RECEPTOR\_SIGNALLING\_CASCADE;REACTOME\_CELL\_SURFACE\_IN

3\_DOWNSTREAM\_SIGNALING\_OF\_ACTIVATED\_FGFR;REACTOME\_PHOSPHOLIPASE\_C\_MEDI

VENTS;REACTOME\_GPCR\_DOWNSTREAM\_SIGNALING;REACTOME\_METABOLISM\_OF\_LIPIDS

\_SURFACE\_INTERACTIONS;REACTOME\_AXON\_GUIDANCE;REACTOME\_OTHER\_SEMAPHOR

ATION;REACTOME\_APC\_C\_CDC20\_MEDIATED\_DEGRADATION\_OF\_MITOTIC\_PROTEINS;REA

THE\_POSTSYNAPTIC\_CELL;REACTOME\_PLC\_BETA\_MEDIATED\_EVENTS;REACTOME\_G\_ALPHA

\_COMPLEX;REACTOME\_MAP\_KINASE\_ACTIVATION\_IN\_TLR\_CASCADE;REACTOME\_JNK\_C\_JI

\_METABOLISM\_OF\_PROTEINS;REACTOME\_POST\_TRANSLATIONAL\_PROTEIN\_MODIFICATIOI

I\_OF\_IFNA\_SIGNALING;REACTOME\_INTERFERON\_SIGNALING;REACTOME\_IL\_2\_SIGNALING;I

i

REACTOME\_NEUROTRANSMITTER\_RECEPTOR\_BINDING\_AND\_DOWNSTREAM\_TRANSMISSI

\_PHASES;REACTOME\_CHROMOSOME\_MAINTENANCE;REACTOME\_LAGGING\_STRAND\_SYN

MEMBRANE;REACTOME\_SIGNALING\_BY\_FGFR\_IN\_DISEASE;REACTOME\_GASTRIN\_CREB\_SI





PTION;REACTOME\_RNA\_POL\_I\_RNA\_POL\_III\_AND\_MITOCHONDRIAL\_TRANSCRIPTION;REAC

:DIATED\_TRANSMEMBRANE\_TRANSPORT;REACTOME\_GLUCOSE\_TRANSPORT;REACTOME\_

:EACTOME\_NEUROTRANSMITTER\_RECEPTOR\_BINDING\_AND\_DOWNSTREAM\_TRANSMISSIO  
NSCRIPTION\_FACTOR\_ACTIVATION;REACTOME\_ERKS\_ARE\_INACTIVATED;REACTOME\_ERK



AGE\_NRIF\_AND\_NADE;REACTOME\_P75\_NTR\_RECEPTOR\_MEDIATED\_SIGNALLING;REACTO



ME\_PLC\_BETA\_MEDIATED\_EVENTS;REACTOME\_PKA\_MEDIATED\_PHOSPHORYLATION\_OF\_C

DE;REACTOME\_NGF\_SIGNALLING\_VIA\_TRKA\_FROM\_THE\_PLASMA\_MEMBRANE;REACTOME\_ DE;REACTOME\_NGF\_SIGNALLING\_VIA\_TRKA\_FROM\_THE\_PLASMA\_MEMBRANE;REACTOME\_

\_M\_G1\_TRANSITION;REACTOME\_G1\_S\_TRANSITION;REACTOME\_CDT1\_ASSOCIATION\_WITH

EACTOME\_FATTY\_ACID\_TRIACYLGLYCEROL\_AND\_KETONE\_BODY\_METABOLISM;REACTOM

TERACTIONS\_AT\_THE\_VASCULAR\_WALL;REACTOME\_NGF\_SIGNALLING\_VIA\_TRKA\_FROM\_





ROL\_AND\_KETONE\_BODY\_METABOLISM;REACTOME\_TRANSCRIPTIONAL\_REGULATION\_OF\_  
.RECEPTOR\_SIGNALING;REACTOME\_NFKB\_AND\_MAP\_KINASES\_ACTIVATION\_MEDIATED\_BY



PEPTIDE\_SLC\_TRANSPORTERS



COL\_HYDROLYSIS;REACTOME\_LIPID\_DIGESTION\_MOBILIZATION\_AND\_TRANSPORT;REACTC

TERACTIONS\_AT\_THE\_VASCULAR\_WALL;REACTOME\_NGF\_SIGNALLING\_VIA\_TRKA\_FROM\_  
TERACTIONS\_AT\_THE\_VASCULAR\_WALL;REACTOME\_NGF\_SIGNALLING\_VIA\_TRKA\_FROM\_

\_CYTOKINE\_SIGNALING\_IN\_IMMUNE\_SYSTEM;REACTOME\_ANTIGEN\_PRESENTATION\_FOLD

ON;REACTOME\_REGULATION\_OF\_INSULIN\_SECRETION;REACTOME\_INHIBITION\_OF\_INSULIN

1/E\_SIGNALING\_BY\_THE\_B\_CELL\_RECEPTOR\_BCR;REACTOME\_INSULIN\_RECEPTOR\_SIGNALING\_PATHWAY\_VIA\_PKC\_AND\_MAPK;REACTOME\_SIGNALING\_BY\_GPCR;REACTOME\_





S;REACTOME\_GPCR\_LIGAND\_BINDING

PROTEINS\_THAT\_BIND\_AU\_RICH\_ELEMENTS;REACTOME\_DESTABILIZATION\_OF\_MRNA\_BY\_KS

REACTOME\_OPIOID\_SIGNALLING;REACTOME\_CA\_DEPENDENT\_EVENTS;REACTOME\_NEUROTIF

PLICATION;REACTOME\_ACTIVATION\_OF\_ATR\_IN\_RESPONSE\_TO\_REPLICATION\_STRESS;REA





REGULATION

S\_AND\_ORGANIC\_ACIDS\_METAL\_IONS\_AND\_AMINE\_COMPOUNDS;REACTOME\_FACILITATIVI

NG\_STRAND\_SYNTHESIS;REACTOME\_DNA\_REPLICATION;REACTOME\_ACTIVATION\_OF\_ATR

REGULATION\_OF\_WHITE\_ADIPOCYTE\_DIFFERENTIATION

MPLEX\_;REACTOME\_FORMATION\_OF\_TRANSCRIPTION\_COUPLED\_NER\_TC\_NER\_REPAIR\_C  
D\_METABOLISM;REACTOME\_METABOLISM\_OF\_LIPIDS\_AND\_LIPOPROTEINS;REACTOME\_ME  
D\_METABOLISM;REACTOME\_METABOLISM\_OF\_LIPIDS\_AND\_LIPOPROTEINS;REACTOME\_ME

;REACTOME\_PACKAGING\_OF\_TELOMERE\_ENDS;REACTOME\_TELOMERE\_MAINTENANCE

3Y\_INSULIN\_RECEPTOR;REACTOME\_HIV\_INFECTION;REACTOME\_HOST\_INTERACTIONS\_OF

TE\_IMMUNE\_SYSTEM;REACTOME\_IMMUNE\_SYSTEM;REACTOME\_CYTOKINE\_SIGNALING\_IN.

SYSTEM;REACTOME\_CYTOKINE\_SIGNALING\_IN\_IMMUNE\_SYSTEM





REACTOME\_PROLONGED\_ERK\_ACTIVATION\_EVENTS;REACTOME\_SIGNALLING\_TO\_RAS;REA

3;REACTOME\_TRAF6\_MEDIATED\_INDUCTION\_OF\_NFKB\_AND\_MAP\_KINASES\_UPON\_TLR7\_8

AY;REACTOME\_METABOLISM\_OF\_LIPIDS\_AND\_LIPOPROTEINS;REACTOME\_FATTY\_ACID\_TF



IA\_Q\_SIGNALLING\_EVENTS;REACTOME\_REGULATION\_OF\_INSULIN\_SECRETION;REACTOME

EACTOME\_FATTY\_ACID\_TRIACYLGLYCEROL\_AND\_KETONE\_BODY\_METABOLISM;REACTOM  
EACTOME\_FATTY\_ACID\_TRIACYLGLYCEROL\_AND\_KETONE\_BODY\_METABOLISM;REACTOM

DN\_BY\_REV\_ERBA;REACTOME\_SIGNALING\_BY\_NOTCH1;REACTOME\_REGULATION\_OF\_HYP

INTERACTIONS;REACTOME\_CELL\_JUNCTION\_ORGANIZATION

ME\_APC\_C\_CDC20\_MEDIATED\_DEGRADATION\_OF\_MITOTIC\_PROTEINS;REACTOME\_AUTOD

PLASMA\_MEMBRANE;REACTOME\_SIGNALING\_BY\_FGFR\_IN\_DISEASE;REACTOME\_PI3K\_AKT





EACTOME\_FATTY\_ACID\_TRIACYLGLYCEROL\_AND\_KETONE\_BODY\_METABOLISM;REACTOM

PLASMA\_MEMBRANE;REACTOME\_SIGNALING\_BY\_FGFR\_IN\_DISEASE;REACTOME\_PI3K\_AKT

LIPID\_DIGESTION\_MOBILIZATION\_AND\_TRANSPORT;REACTOME\_LIPOPROTEIN\_METABOLIS  
LIPID\_DIGESTION\_MOBILIZATION\_AND\_TRANSPORT;REACTOME\_LIPOPROTEIN\_METABOLIS

STEM;REACTOME\_SIGNALING\_BY\_GPCR;REACTOME\_NEUROTRANSMITTER\_RECEPTOR\_B

ME\_TRANSLOCATION\_OF\_ZAP\_70\_TO\_IMMUNOLOGICAL\_SYNAPSE;REACTOME\_GENERATIO

TRIACYLGLYCEROL\_AND\_KETONE\_BODY\_METABOLISM;REACTOME\_PKB\_MEDIATED\_EVEN

REACTOME\_IL\_6\_SIGNALING;REACTOME\_IMMUNE\_SYSTEM;REACTOME\_CYTOKINE\_SIGNAL

4D\_IN\_SEMAPHORIN\_SIGNALING;REACTOME\_SEMAPHORIN\_INTERACTIONS;REACTOME\_SE

:DIATED\_TRANSMEMBRANE\_TRANSPORT;REACTOME\_GLUCOSE\_TRANSPORT;REACTOME\_

ME\_SIGNALING\_BY\_THE\_B\_CELL\_RECEPTOR\_BCR;REACTOME\_NGF\_SIGNALLING\_VIA\_TRK

NDING\_INITIATES\_THE\_SECOND\_PROTEOLYTIC\_CLEAVAGE\_OF\_NOTCH\_RECEPTOR;REAC

EACTOME\_FATTY\_ACID\_TRIACYLGLYCEROL\_AND\_KETONE\_BODY\_METABOLISM;REACTOM

\_IMMUNE\_SYSTEM

ON;REACTOME\_HEMOSTASIS



SYSTEM;REACTOME\_PLATELET\_ACTIVATION\_SIGNALING\_AND\_AGGREGATION

ACTOME\_CLASS\_I\_MHC\_MEDIATED\_ANTIGEN\_PROCESSING\_PRESENTATION

ACTOME\_REGULATION\_OF\_IFNG\_SIGNALING;REACTOME\_INTERFERON\_GAMMA\_SIGNALING;

ACTOME\_PI3K\_CASCADE

TRANSPORTERS;REACTOME\_AMINE\_COMPOUND\_SLC\_TRANSPORTERS;REACTOME\_GABA\_SYN

TH;REACTOME\_SIGNALLING\_TO\_RAS;REACTOME\_NGF\_SIGNALLING\_VIA\_TRKA\_FROM\_TH





EVENTS;REACTOME\_G\_ALPHA1213\_SIGNALLING\_EVENTS;REACTOME\_GPCR\_DOWNSTREAM  
EVENTS;REACTOME\_G\_ALPHA1213\_SIGNALLING\_EVENTS;REACTOME\_GPCR\_DOWNSTREAM

DING\_TO\_GENERATION\_OF\_SECOND\_MESSENGERS;REACTOME\_SIGNALING\_BY\_THE\_B\_CI

'TOR;REACTOME\_FGFR\_LIGAND\_BINDING\_AND\_ACTIVATION;REACTOME\_FGFR4\_LIGAND\_E  
'TOR;REACTOME\_FGFR\_LIGAND\_BINDING\_AND\_ACTIVATION;REACTOME\_FGFR4\_LIGAND\_E  
'TOR;REACTOME\_FGFR\_LIGAND\_BINDING\_AND\_ACTIVATION;REACTOME\_FGFR4\_LIGAND\_E  
TED\_DECAY\_ENHANCED\_BY\_THE\_EXON\_JUNCTION\_COMPLEX

GNALLING\_PATHWAY\_VIA\_PKC\_AND\_MAPK;REACTOME\_SIGNALING\_BY\_GPCR;REACTOME\_

.TED\_DECAY\_ENHANCED\_BY\_THE\_EXON\_JUNCTION\_COMPLEX





D\_SIGNALLING;REACTOME\_CA\_DEPENDENT\_EVENTS;REACTOME\_ADENYLATE\_CYCLASE\_A

ACTOME\_NCAM\_SIGNALING\_FOR\_NEURITE\_OUT\_GROWTH;REACTOME\_HEMOSTASIS;REAC

ECEPTOR\_BCR;REACTOME\_P53\_INDEPENDENT\_G1\_S\_DNA\_DAMAGE\_CHECKPOINT;REACT  
\_M\_G1\_TRANSITION;REACTOME\_G1\_S\_TRANSITION;REACTOME\_CDT1\_ASSOCIATION\_WITH

TRIACYLGLYCEROL\_AND\_KETONE\_BODY\_METABOLISM;REACTOME\_PKB\_MEDIATED\_EVEN  
TRIACYLGLYCEROL\_AND\_KETONE\_BODY\_METABOLISM;REACTOME\_PKB\_MEDIATED\_EVEN

:DIATED\_CASCADE;REACTOME\_PI\_3K\_CASCADE;REACTOME\_DOWNSTREAM\_SIGNALING\_C  
:DIATED\_CASCADE;REACTOME\_PI\_3K\_CASCADE;REACTOME\_DOWNSTREAM\_SIGNALING\_C

PEPTIDE\_SLC\_TRANSPORTERS



PLASMA\_MEMBRANE;REACTOME\_SIGNALING\_BY\_FGFR\_IN\_DISEASE;REACTOME\_PI3K\_AKT

;TOME\_REGULATION\_OF\_INSULIN\_SECRETION;REACTOME\_GABA\_SYNTHESIS\_RELEASE\_R

OME\_APOPTOTIC\_EXECUTION\_PHASE

OME\_APOPTOTIC\_EXECUTION\_PHASE

OME\_APOPTOTIC\_EXECUTION\_PHASE

OME\_APOPTOTIC\_EXECUTION\_PHASE

SYSTEM;REACTOME\_CYTOKINE\_SIGNALING\_IN\_IMMUNE\_SYSTEM





ECEPTOR\_BCR;REACTOME\_P53\_INDEPENDENT\_G1\_S\_DNA\_DAMAGE\_CHECKPOINT;REACT

ION;REACTOME\_TRANSMISSION\_ACROSS\_CHEMICAL\_SYNAPSES;REACTOME\_NEURONAL\_

ACTIVATES\_NFKB\_BY\_PHOSPHORYLATION\_AND\_ACTIVATION\_OF\_IKKS\_COMPLEX;REACTC

PLASMA\_MEMBRANE;REACTOME\_SIGNALING\_BY\_FGFR\_IN\_DISEASE;REACTOME\_PI3K\_AKT

THESIS;REACTOME\_INHIBITION\_OF\_REPLICATION\_INITIATION\_OF\_DAMAGED\_DNA\_BY\_RB1

G\_BY\_TGF\_BETA\_RECEPTOR\_COMPLEX

REPAIR;REACTOME\_AUTODEGRADATION\_OF\_THE\_E3\_UBIQUITIN\_LIGASE\_COP1;REACTOM

4D\_IN\_SEMAPHORIN\_SIGNALING;REACTOME\_SEMAPHORIN\_INTERACTIONS;REACTOME\_SE  
4D\_IN\_SEMAPHORIN\_SIGNALING;REACTOME\_SEMAPHORIN\_INTERACTIONS;REACTOME\_SE

ACTOME\_COSTIMULATION\_BY\_THE\_CD28\_FAMILY;REACTOME\_HIV\_INFECTION;REACTOME\_HI

D\_SIGNALLING;REACTOME\_CA\_DEPENDENT\_EVENTS;REACTOME\_ADENYLATE\_CYCLASE\_F

NG\_STRAND\_SYNTHESIS;REACTOME\_DNA\_REPLICATION;REACTOME\_ACTIVATION\_OF\_ATR

ERS;REACTOME\_HEMOSTASIS

IGNALING;REACTOME\_DOWNSTREAM\_SIGNALING\_EVENTS\_OF\_B\_CELL\_RECEPTOR\_BCR;F

IA\_Q\_SIGNALLING\_EVENTS;REACTOME\_REGULATION\_OF\_INSULIN\_SECRETION;REACTOME





ATED\_DECAY\_ENHANCED\_BY\_THE\_EXON\_JUNCTION\_COMPLEX

§\_TRANSCRIPTION;REACTOME\_CIRCADIAN\_REPRESSION\_OF\_EXPRESSION\_BY\_REV\_ERBA  
§\_TRANSCRIPTION;REACTOME\_CIRCADIAN\_REPRESSION\_OF\_EXPRESSION\_BY\_REV\_ERBA  
§\_TRANSCRIPTION;REACTOME\_CIRCADIAN\_REPRESSION\_OF\_EXPRESSION\_BY\_REV\_ERBA  
D\_SIGNALLING;REACTOME\_CA\_DEPENDENT\_EVENTS;REACTOME\_ADENYLATE\_CYCLASE\_A



:DIATED\_TRANSMEMBRANE\_TRANSPORT;REACTOME\_GLUCOSE\_TRANSPORT;REACTOME\_  
:DIATED\_TRANSMEMBRANE\_TRANSPORT;REACTOME\_GLUCOSE\_TRANSPORT;REACTOME\_

PATHWAY;REACTOME\_TRANSCRIPTION;REACTOME\_NUCLEOTIDE\_EXCISION\_REPAIR;REACTOME\_PLATELET\_ACTIVATION\_SIGNALING\_AND\_AGGREGATION

;\_BY\_NOTCH1;REACTOME\_TRANSCRIPTIONAL\_ACTIVITY\_OF\_SMAD2\_SMAD3\_SMAD4\_HETE  
;\_BY\_NOTCH1;REACTOME\_TRANSCRIPTIONAL\_ACTIVITY\_OF\_SMAD2\_SMAD3\_SMAD4\_HETE

E\_SYSTEM;REACTOME\_ACTIVATED\_TLR4\_SIGNALLING;REACTOME\_IMMUNE\_SYSTEM;REAC

TION;REACTOME\_TRANSMISSION\_ACROSS\_CHEMICAL\_SYNAPSES;REACTOME\_NEURONAL\_

.TED\_DECAY\_ENHANCED\_BY\_THE\_EXON\_JUNCTION\_COMPLEX

CTION;REACTOME\_SIGNALING\_BY\_ILS;REACTOME\_IL\_6\_SIGNALING;REACTOME\_IMMUNE\_S  
CTION;REACTOME\_SIGNALING\_BY\_ILS;REACTOME\_IL\_6\_SIGNALING;REACTOME\_IMMUNE\_S  
CTION;REACTOME\_SIGNALING\_BY\_ILS;REACTOME\_IL\_6\_SIGNALING;REACTOME\_IMMUNE\_S

ACTOME\_NCAM\_SIGNALING\_FOR\_NEURITE\_OUT\_GROWTH;REACTOME\_HEMOSTASIS;REAC



\_PROMOTER\_OPENING;REACTOME\_MRNA\_PROCESSING;REACTOME\_MRNA\_SPLICING;REA

\_SIGNALING\_BY\_GPCR;REACTOME\_GPVI\_MEDIATED\_ACTIVATION\_CASCADE;REACTOME\_G  
1\_SIGNALING;REACTOME\_SIGNALING\_BY\_TGF\_BETA\_RECEPTOR\_COMPLEX



D\_SIGNALLING;REACTOME\_RECRUITMENT\_OF\_MITOTIC\_CENTROSOME\_PROTEINS\_AND\_C

:\_SIGNALING\_BY\_TGF\_BETA\_RECEPTOR\_COMPLEX;REACTOME\_PLATELET\_ACTIVATION\_SI

NER;REACTOME\_SYNTHESIS\_OF\_DNA;REACTOME\_DNA\_REPAIR;REACTOME\_CHROMOSOM  
NER;REACTOME\_SYNTHESIS\_OF\_DNA;REACTOME\_DNA\_REPAIR;REACTOME\_CHROMOSOM  
NER;REACTOME\_SYNTHESIS\_OF\_DNA;REACTOME\_DNA\_REPAIR;REACTOME\_CHROMOSOM



ME\_GPCR\_DOWNSTREAM\_SIGNALING;REACTOME\_G\_ALPHA\_I\_SIGNALLING\_EVENTS;REA  
ME\_GPCR\_DOWNSTREAM\_SIGNALING;REACTOME\_G\_ALPHA\_I\_SIGNALLING\_EVENTS;REA

\_ING;REACTOME\_G\_ALPHA\_I\_SIGNALLING\_EVENTS;REACTOME\_TAK1\_ACTIVATES\_NFKB\_B'

.ICATION;REACTOME\_ACTIVATION\_OF\_ATR\_IN\_RESPONSE\_TO\_REPLICATION\_STRESS;REA

K\_CHANNELS  
K\_CHANNELS









TERACTIONS\_AT\_THE\_VASCULAR\_WALL;REACTOME\_NGF\_SIGNALLING\_VIA\_TRKA\_FROM\_

E\_PLATELET\_ACTIVATION\_SIGNALING\_AND\_AGGREGATION

A\_NON\_LYMPHOID\_CELL;REACTOME\_INTERFERON\_GAMMA\_SIGNALING;REACTOME\_INTER

IGNALING;REACTOME\_DOWNSTREAM\_SIGNALING\_EVENTS\_OF\_B\_CELL\_RECEPTOR\_BCR;F

JN\_KINASES\_PHOSPHORYLATION\_AND\_ACTIVATION\_MEDIATED\_BY\_ACTIVATED\_HUMAN\_T

:\_NEURITE\_OUT\_GROWTH;REACTOME\_NETRIN1\_SIGNALING;REACTOME\_DCC\_MEDIATED\_

CASCADE;REACTOME\_SIGNALING\_BY\_INSULIN\_RECEPTOR;REACTOME\_FGFR\_LIGAND\_BIN

4D\_IN\_SEMAPHORIN\_SIGNALING;REACTOME\_SEMAPHORIN\_INTERACTIONS;REACTOME\_SE

OF\_DNA\_REPLICATION;REACTOME\_S\_PHASE

JN\_KINASES\_PHOSPHORYLATION\_AND\_ACTIVATION\_MEDIATED\_BY\_ACTIVATED\_HUMAN\_T

'ATION\_OF\_RAC;REACTOME\_SIGNALING\_BY\_ROBO\_RECEPTOR

ISLATIONAL\_REGULATION;REACTOME\_METABOLISM\_OF\_MRNA;REACTOME\_METABOLISM\_I

\_CYTOKINE\_SIGNALING\_IN\_IMMUNE\_SYSTEM;REACTOME\_ANTIGEN\_PRESENTATION\_FOLD

\_IMMUNE\_SYSTEM;REACTOME\_ADAPTIVE\_IMMUNE\_SYSTEM



ACTOME\_G\_ALPHA\_I\_SIGNALLING\_EVENTS;REACTOME\_G\_ALPHA\_S\_SIGNALLING\_EVENTS;RI

ME\_APC\_C\_CDC20\_MEDIATED\_DEGRADATION\_OF\_MITOTIC\_PROTEINS;REACTOME\_AUTOD

F\_IFNG\_SIGNALING;REACTOME\_INTERFERON\_GAMMA\_SIGNALING;REACTOME\_INTERFERO

:AGE\_NRIF\_AND\_NADE;REACTOME\_P75\_NTR\_RECEPTOR\_MEDIATED\_SIGNALLING;REACTO





1\_OF\_LIPIDS\_AND\_LIPOPOTEINS

\_TYPE\_3\_PROMOTER;REACTOME\_HIV\_INFECTON;REACTOME\_HIV\_LIFE\_CYCLE;REACTOME

\_THROMBOXANE\_SIGNALLING\_THROUGH\_TP\_RECEPTOR;REACTOME\_THROMBIN\_SIGNALI

GULATION;REACTOME\_AXON\_GUIDANCE;REACTOME\_LYSOSOME\_VESICLE\_BIOGENESIS;R

SIGNALING\_BY\_ROBO\_RECEPTOR;REACTOME\_METABOLISM\_OF\_CARBOHYDRATES

\_CYTOKINE\_SIGNALING\_IN\_IMMUNE\_SYSTEM;REACTOME\_ANTIGEN\_PRESENTATION\_FOLD

REPAIR;REACTOME\_AUTODEGRADATION\_OF\_THE\_E3\_UBIQUITIN\_LIGASE\_COP1;REACTOM

ME\_SIGNALING\_BY\_THE\_B\_CELL\_RECEPTOR\_BCR;REACTOME\_INSULIN\_RECEPTOR\_SIGNALI





:DIATED\_TRANSMEMBRANE\_TRANSPORT;REACTOME\_GLUCOSE\_TRANSPORT;REACTOME\_



.TED\_DECAY\_ENHANCED\_BY\_THE\_EXON\_JUNCTION\_COMPLEX

TERACTIONS\_AT\_THE\_VASCULAR\_WALL;REACTOME\_NGF\_SIGNALLING\_VIA\_TRKA\_FROM\_I

IATED\_CASCADE;REACTOME\_SHC\_MEDIATED\_CASCADE;REACTOME\_SIGNALING\_BY\_INSUL

S\_AND\_LIPOPROTEINS;REACTOME\_FATTY\_ACID\_TRIACYLGLYCEROL\_AND\_KETONE\_BODY\_

IN\_INTERACTIONS;REACTOME\_SEMAPHORIN\_INTERACTIONS;REACTOME\_CELL\_EXTRACEL

CTOME\_MITOTIC\_PROMETAPHASE;REACTOME\_APC\_CDC20\_MEDIATED\_DEGRADATION\_OF

-IA\_Q\_SIGNALLING\_EVENTS;REACTOME\_REGULATION\_OF\_INSULIN\_SECRETION;REACTOME

JN\_KINASES\_PHOSPHORYLATION\_AND\_ACTIVATION\_MEDIATED\_BY\_ACTIVATED\_HUMAN\_T

N;REACTOME\_SIGNALING\_BY\_NOTCH;REACTOME\_METABOLISM\_OF\_CARBOHYDRATES

REACTOME\_IL\_6\_SIGNALING;REACTOME\_IMMUNE\_SYSTEM;REACTOME\_CYTOKINE\_SIGNAL

ON\_IN\_THE\_POSTSYNAPTIC\_CELL;REACTOME\_G\_ALPHA1213\_SIGNALLING\_EVENTS;REACT

THESIS;REACTOME\_INHIBITION\_OF\_REPLICATION\_INITIATION\_OF\_DAMAGED\_DNA\_BY\_RB1

GNALLING\_PATHWAY\_VIA\_PKC\_AND\_MAPK;REACTOME\_SIGNALING\_BY\_GPCR;REACTOME\_





;TOME\_SIGNALING\_BY\_NOTCH;REACTOME\_RNA\_POL\_I\_TRANSCRIPTION\_INITIATION

.METABOLISM\_OF\_RNA;REACTOME\_INTERFERON\_SIGNALING;REACTOME\_METABOLISM\_OF

ON\_IN\_THE\_POSTSYNAPTIC\_CELL;REACTOME\_PLC\_BETA\_MEDIATED\_EVENTS;REACTOME\_  
\_MAPK\_TARGETS;REACTOME\_GLYCOLYSIS;REACTOME\_SIGNALING\_BY\_GPCR;REACTOME\_



ME\_TAK1\_ACTIVATES\_NFKB\_BY\_PHOSPHORYLATION\_AND\_ACTIVATION\_OF\_IKKS\_COMPLE



;REB;REACTOME\_TRANSMEMBRANE\_TRANSPORT\_OF\_SMALL\_MOLECULES;REACTOME\_GL

\_SIGNALING\_BY\_FGFR\_IN\_DISEASE;REACTOME\_PI3K\_AKT\_ACTIVATION;REACTOME\_GAB1\_  
\_SIGNALING\_BY\_FGFR\_IN\_DISEASE;REACTOME\_PI3K\_AKT\_ACTIVATION;REACTOME\_GAB1\_

I\_THE\_CDC6\_ORC\_ORIGIN\_COMPLEX;REACTOME\_SYNTHESIS\_OF\_DNA;REACTOME\_MITOTI

E\_CIRCADIAN\_CLOCK;REACTOME\_TRANSCRIPTIONAL\_REGULATION\_OF\_WHITE\_ADIPOCYT

THE\_PLASMA\_MEMBRANE;REACTOME\_SIGNALING\_BY\_FGFR\_IN\_DISEASE;REACTOME\_PHO





WHITE\_ADIPOCYTE\_DIFFERENTIATION;REACTOME\_SIGNALING\_BY\_NOTCH;REACTOME\_SIK  
/\_TLR4\_SIGNALING\_REPERTOIRE;REACTOME\_RIG\_I\_MDA5\_MEDIATED\_INDUCTION\_OF\_IFN.







HOME\_HEMOSTASIS;REACTOME\_PLATELET\_ACTIVATION\_SIGNALING\_AND\_AGGREGATION

THE\_PLASMA\_MEMBRANE;REACTOME\_SIGNALING\_BY\_FGFR\_IN\_DISEASE;REACTOME\_PHO  
THE\_PLASMA\_MEMBRANE;REACTOME\_SIGNALING\_BY\_FGFR\_IN\_DISEASE;REACTOME\_PHO

ING\_ASSEMBLY\_AND\_PEPTIDE\_LOADING\_OF\_CLASS\_I\_MHC;REACTOME\_CLASS\_I\_MHC\_ME

↓\_SECRETION\_BY\_ADRENALINE\_NORADRENALINE;REACTOME\_GPCR\_DOWNSTREAM\_SIGN

LLING\_CASCADE;REACTOME\_ARMS\_MEDIATED\_ACTIVATION;REACTOME\_PROLONGED\_ERK  
\_INTEGRATION\_OF\_ENERGY\_METABOLISM;REACTOME\_OPIOID\_SIGNALLING;REACTOME\_PI





RP;REACTOME\_DESTABILIZATION\_OF\_MRNA\_BY\_TRISTETRAPROLIN\_TTP

RANSMITTER\_RECEPTOR\_BINDING\_AND\_DOWNSTREAM\_TRANSMISSION\_IN\_THE\_POSTSYN

CTOME\_UNWINDING\_OF\_DNA;REACTOME\_G2\_M\_CHECKPOINTS;REACTOME\_S\_PHASE;RE/





E\_NA\_INDEPENDENT\_GLUCOSE\_TRANSPORTERS;REACTOME\_GLUCOSE\_TRANSPORT;REA

\_IN\_RESPONSE\_TO\_REPLICATION\_STRESS;REACTOME\_TELOMERE\_MAINTENANCE;REACT

OMPLEX;REACTOME\_RNA\_POL\_I\_RNA\_POL\_III\_AND\_MITOCHONDRIAL\_TRANSCRIPTION;RE

:TABOLISM\_OF\_CARBOHYDRATES

:TABOLISM\_OF\_CARBOHYDRATES

:\_HIV\_FACTORS;REACTOME\_THE\_ROLE\_OF\_NEF\_IN\_HIV1\_REPLICATION\_AND\_DISEASE\_PA

\_IMMUNE\_SYSTEM





CTOME\_NGF\_SIGNALLING\_VIA\_TRKA\_FROM\_THE\_PLASMA\_MEMBRANE;REACTOME\_SIGNAL

\_OR\_9\_ACTIVATION;REACTOME\_NFKB\_AND\_MAP\_KINASES\_ACTIVATION\_MEDIATED\_BY\_TL

ACYLGLYCEROL\_AND\_KETONE\_BODY\_METABOLISM;REACTOME\_CIRCADIAN\_CLOCK;REA



E\_REGULATION\_OF\_INSULIN\_SECRETION\_BY\_ACETYLCHOLINE;REACTOME\_G\_BETA\_GAMM

E\_CIRCADIAN\_CLOCK;REACTOME\_TRANSCRIPTIONAL\_REGULATION\_OF\_WHITE\_ADIPOCYT  
E\_CIRCADIAN\_CLOCK;REACTOME\_TRANSCRIPTIONAL\_REGULATION\_OF\_WHITE\_ADIPOCYT

OXIA\_INDUCIBLE\_FACTOR\_HIF\_BY\_OXYGEN;REACTOME\_METABOLISM\_OF\_LIPIDS\_AND\_LIF



EGRADATION\_OF\_CDH1\_BY\_CDH1\_APC\_C;REACTOME\_APC\_C\_CDC20\_MEDIATED\_DEGRAD

\_ACTIVATION;REACTOME\_GAB1\_SIGNALOSOME;REACTOME\_SIGNALING\_BY\_PDGF;REACTC





E\_CIRCADIAN\_CLOCK;REACTOME\_TRANSCRIPTIONAL\_REGULATION\_OF\_WHITE\_ADIPOCYT

\_ACTIVATION;REACTOME\_AKT\_PHOSPHORYLATES\_TARGETS\_IN\_THE\_CYTOSOL;REACTOM

3M;REACTOME\_CHYLOMICRON\_MEDIATED\_LIPID\_TRANSPORT;REACTOME\_AMYLOIDS  
3M;REACTOME\_CHYLOMICRON\_MEDIATED\_LIPID\_TRANSPORT;REACTOME\_AMYLOIDS

INDING\_AND\_DOWNSTREAM\_TRANSMISSION\_IN\_THE\_POSTSYNAPTIC\_CELL;REACTOME\_A

IN\_OF\_SECOND\_MESSENGER\_MOLECULES;REACTOME\_GPVI\_MEDIATED\_ACTIVATION\_CAS

TS;REACTOME\_SIGNALING\_BY\_INSULIN\_RECEPTOR;REACTOME\_PI3K\_CASCADE

.ING\_IN\_IMMUNE\_SYSTEM

MA4D\_INDUCED\_CELL\_MIGRATION\_AND\_GROWTH\_CONE\_COLLAPSE

.METABOLISM\_OF\_RNA;REACTOME\_INTERFERON\_SIGNALING;REACTOME\_METABOLISM\_OF

A\_FROM\_THE\_PLASMA\_MEMBRANE;REACTOME\_SIGNALING\_BY\_FGFR\_IN\_DISEASE;REACTO

TOME\_SIGNALING\_BY\_NOTCH;REACTOME\_IMMUNE\_SYSTEM;REACTOME\_CYTOKINE\_SIGNA

E\_CIRCADIAN\_CLOCK;REACTOME\_TRANSCRIPTIONAL\_REGULATION\_OF\_WHITE\_ADIPOCYT





REACTOME\_INTERFERON\_ALPHA\_BETA\_SIGNALING;REACTOME\_REGULATION\_OF\_IFNA\_SI

SYNTHESIS\_RELEASE\_REUPTAKE\_AND\_DEGRADATION

PLASMA\_MEMBRANE;REACTOME\_SIGNALLING\_TO\_ERKS;REACTOME\_SIGNALING\_BY\_FC





W\_SIGNALING;REACTOME\_NETRIN1\_SIGNALING;REACTOME\_DCC\_MEDIATED\_ATTRACTIVE\_  
W\_SIGNALING;REACTOME\_NETRIN1\_SIGNALING;REACTOME\_DCC\_MEDIATED\_ATTRACTIVE\_

ELL\_RECEPTOR\_BCR;REACTOME\_INSULIN\_RECEPTOR\_SIGNALLING\_CASCADE;REACTOME

BINDING\_AND\_ACTIVATION;REACTOME\_SIGNALING\_BY\_FGFR;REACTOME\_PI3K\_CASCADE  
BINDING\_AND\_ACTIVATION;REACTOME\_SIGNALING\_BY\_FGFR;REACTOME\_PI3K\_CASCADE  
BINDING\_AND\_ACTIVATION;REACTOME\_SIGNALING\_BY\_FGFR;REACTOME\_PI3K\_CASCADE

\_INTEGRATION\_OF\_ENERGY\_METABOLISM;REACTOME\_OPIOID\_SIGNALLING;REACTOME\_PI



IFKB\_AND\_MAP\_KINASES\_ACTIVATION\_MEDIATED\_BY\_TLR4\_SIGNALING\_REPERTOIRE;REA

ACTIVATING\_PATHWAY;REACTOME\_ADENYLATE\_CYCLASE\_INHIBITORY\_PATHWAY;REACTC

ACTOME\_PLATELET\_ACTIVATION\_SIGNALING\_AND\_AGGREGATION

OME\_CDK\_MEDIATED\_PHOSPHORYLATION\_AND\_REMOVAL\_OF\_CDC6;REACTOME\_METABOLISM\_OF\_CDC6\_ORC\_ORIGIN\_COMPLEX;REACTOME\_SYNTHESIS\_OF\_DNA;REACTOME\_MITOTIC\_CELL\_CYCLE

TS;REACTOME\_SIGNALING\_BY\_INSULIN\_RECEPTOR;REACTOME\_PI3K\_CASCADE  
TS;REACTOME\_SIGNALING\_BY\_INSULIN\_RECEPTOR;REACTOME\_PI3K\_CASCADE

MF\_ACTIVATED\_FGFR;REACTOME\_PHOSPHOLIPASE\_C\_MEDIATED\_CASCADE;REACTOME\_SI  
MF\_ACTIVATED\_FGFR;REACTOME\_PHOSPHOLIPASE\_C\_MEDIATED\_CASCADE;REACTOME\_SI





\_ACTIVATION;REACTOME\_GAB1\_SIGNALOSOME;REACTOME\_SIGNALING\_BY\_PDGF;REACTO

EUPTAKE\_AND\_DEGRADATION





OME\_CDK\_MEDIATED\_PHOSPHORYLATION\_AND\_REMOVAL\_OF\_CDC6;REACTOME\_METABC

\_SYSTEM;REACTOME\_NEUROTRANSMITTER\_RECEPTOR\_BINDING\_AND\_DOWNSTREAM\_TR

ME\_GPCR\_LIGAND\_BINDING;REACTOME\_TRAF6\_MEDIATED\_NFKB\_ACTIVATION;REACTOME

\_ACTIVATION;REACTOME\_AKT\_PHOSPHORYLATES\_TARGETS\_IN\_THE\_CYTOSOL;REACTOME

\_E2F1;REACTOME\_DNA\_REPLICATION;REACTOME\_E2F\_MEDIATED\_REGULATION\_OF\_DNA\_

IE\_DNA\_REPAIR;REACTOME\_MEIOTIC\_RECOMBINATION;REACTOME\_G2\_M\_CHECKPOINTS;I

MA4D\_INDUCED\_CELL\_MIGRATION\_AND\_GROWTH\_CONE\_COLLAPSE  
MA4D\_INDUCED\_CELL\_MIGRATION\_AND\_GROWTH\_CONE\_COLLAPSE

V\_LIFE\_CYCLE;REACTOME\_EARLY\_PHASE\_OF\_HIV\_LIFE\_CYCLE;REACTOME\_HOST\_INTERA

ACTIVATING\_PATHWAY;REACTOME\_ADENYLATE\_CYCLASE\_INHIBITORY\_PATHWAY;REACTC

!\_IN\_RESPONSE\_TO\_REPLICATION\_STRESS;REACTOME\_TELOMERE\_MAINTENANCE;REACT



REACTOME\_SIGNALING\_BY\_THE\_B\_CELL\_RECEPTOR\_BCR;REACTOME\_NGF\_SIGNALLING\_V

REGULATION\_OF\_INSULIN\_SECRETION\_BY\_ACETYLCHOLINE;REACTOME\_G\_BETA\_GAMM





;REACTOME\_SIGNALING\_BY\_NOTCH1;REACTOME\_REGULATION\_OF\_HYPOXIA\_INDUCIBLE\_  
;REACTOME\_SIGNALING\_BY\_NOTCH1;REACTOME\_REGULATION\_OF\_HYPOXIA\_INDUCIBLE\_  
;REACTOME\_SIGNALING\_BY\_NOTCH1;REACTOME\_REGULATION\_OF\_HYPOXIA\_INDUCIBLE\_  
ACTIVATING\_PATHWAY;REACTOME\_ADENYLATE\_CYCLASE\_INHIBITORY\_PATHWAY;REACTC



.METABOLISM\_OF\_RNA;REACTOME\_INTERFERON\_SIGNALING;REACTOME\_METABOLISM\_OF  
.METABOLISM\_OF\_RNA;REACTOME\_INTERFERON\_SIGNALING;REACTOME\_METABOLISM\_OF

OME\_FORMATION\_OF\_RNA\_POL\_II\_ELONGATION\_COMPLEX\_;REACTOME\_ELONGATION\_AF

ROTRIMER;REACTOME\_DOWNREGULATION\_OF\_SMAD2\_3\_SMAD4\_TRANSCRIPTIONAL\_ACT  
ROTRIMER;REACTOME\_DOWNREGULATION\_OF\_SMAD2\_3\_SMAD4\_TRANSCRIPTIONAL\_ACT

CTOME\_TOLL\_RECEPTOR\_CASCADES

\_SYSTEM;REACTOME\_NEUROTRANSMITTER\_RECEPTOR\_BINDING\_AND\_DOWNSTREAM\_TR

SYSTEM;REACTOME\_CYTOKINE\_SIGNALING\_IN\_IMMUNE\_SYSTEM  
SYSTEM;REACTOME\_CYTOKINE\_SIGNALING\_IN\_IMMUNE\_SYSTEM  
SYSTEM;REACTOME\_CYTOKINE\_SIGNALING\_IN\_IMMUNE\_SYSTEM

REACTOME\_PLATELET\_ACTIVATION\_SIGNALING\_AND\_AGGREGATION



CTOME\_MRNA\_SPLICING\_MINOR\_PATHWAY;REACTOME\_TRANSCRIPTION;REACTOME\_NUC

}\_ALPHA1213\_SIGNALLING\_EVENTS;REACTOME\_CD28\_CO\_STIMULATION;REACTOME\_GPCF



OMPLEXES;REACTOME\_CA\_DEPENDENT\_EVENTS;REACTOME\_DARPP\_32\_EVENTS;REACTC

GNALING\_AND\_AGGREGATION

1E\_MAINTENANCE;REACTOME\_GLOBAL\_GENOMIC\_NER\_GG\_NER;REACTOME\_LAGGING\_ST  
1E\_MAINTENANCE;REACTOME\_GLOBAL\_GENOMIC\_NER\_GG\_NER;REACTOME\_LAGGING\_ST  
1E\_MAINTENANCE;REACTOME\_GLOBAL\_GENOMIC\_NER\_GG\_NER;REACTOME\_LAGGING\_ST



CTOME\_G\_ALPHA\_S\_SIGNALLING\_EVENTS;REACTOME\_G\_ALPHA\_Z\_SIGNALLING\_EVENTS;F  
CTOME\_G\_ALPHA\_S\_SIGNALLING\_EVENTS;REACTOME\_G\_ALPHA\_Z\_SIGNALLING\_EVENTS;F

Y\_PHOSPHORYLATION\_AND\_ACTIVATION\_OF\_IKKS\_COMPLEX;REACTOME\_GPCR\_LIGAND\_I

CTOME\_UNWINDING\_OF\_DNA;REACTOME\_G2\_M\_CHECKPOINTS;REACTOME\_S\_PHASE;RE/











THE\_PLASMA\_MEMBRANE;REACTOME\_SIGNALING\_BY\_FGFR\_IN\_DISEASE;REACTOME\_PHO

IFERON\_ALPHA\_BETA\_SIGNALING;REACTOME\_INTERFERON\_SIGNALING;REACTOME\_HIV\_I

REACTOME\_SIGNALING\_BY\_THE\_B\_CELL\_RECEPTOR\_BCR;REACTOME\_NGF\_SIGNALLING\_V

AK1;REACTOME\_ACTIVATED\_TAK1\_MEDIATES\_P38\_MAPK\_ACTIVATION;REACTOME\_SIGNAL

ATTRACTIVE\_SIGNALING;REACTOME\_SIGNAL\_REGULATORY\_PROTEIN\_SIRP\_FAMILY\_INTEF

NDING\_AND\_ACTIVATION;REACTOME\_FGFR2C\_LIGAND\_BINDING\_AND\_ACTIVATION;REACTC

MA4D\_INDUCED\_CELL\_MIGRATION\_AND\_GROWTH\_CONE\_COLLAPSE

TAK1;REACTOME\_ACTIVATED\_TAK1\_MEDIATES\_P38\_MAPK\_ACTIVATION;REACTOME\_SIGNAL

OF\_RNA;REACTOME\_INFLUENZA\_LIFE\_CYCLE;REACTOME\_INFLUENZA\_VIRAL\_RNA\_TRANS(

ING\_ASSEMBLY\_AND\_PEPTIDE\_LOADING\_OF\_CLASS\_I\_MHC;REACTOME\_CLASS\_I\_MHC\_ME





EACTOME\_G\_ALPHA\_Z\_SIGNALLING\_EVENTS;REACTOME\_SIGNAL\_AMPLIFICATION;REACTC

EGRADATION\_OF\_CDH1\_BY\_CDH1\_APC\_C;REACTOME\_APC\_C\_CDC20\_MEDIATED\_DEGRAD

IN\_SIGNALING;REACTOME\_IL\_2\_SIGNALING;REACTOME\_IL\_6\_SIGNALING;REACTOME\_HEMC

ME\_TAK1\_ACTIVATES\_NFKB\_BY\_PHOSPHORYLATION\_AND\_ACTIVATION\_OF\_IKKS\_COMPLE





Ξ\_LATE\_PHASE\_OF\_HIV\_LIFE\_CYCLE

ΛING\_THROUGH\_PROTEINASE\_ACTIVATED\_RECEPTORS\_PARS;REACTOME\_HEMOSTASIS;R

EACTOME\_GOLGI\_ASSOCIATED\_VESICLE\_BIOGENESIS;REACTOME\_L1CAM\_INTERACTIONS

ING\_ASSEMBLY\_AND\_PEPTIDE\_LOADING\_OF\_CLASS\_I\_MHC;REACTOME\_CLASS\_I\_MHC\_ME

IE\_DNA\_REPAIR;REACTOME\_MEIOTIC\_RECOMBINATION;REACTOME\_G2\_M\_CHECKPOINTS;I

LLING\_CASCADE;REACTOME\_ARMS\_MEDIATED\_ACTIVATION;REACTOME\_PROLONGED\_ERF





.METABOLISM\_OF\_RNA;REACTOME\_INTERFERON\_SIGNALING;REACTOME\_METABOLISM\_OF



THE\_PLASMA\_MEMBRANE;REACTOME\_SIGNALING\_BY\_FGFR\_IN\_DISEASE;REACTOME\_PHO

\_IN\_RECEPTOR;REACTOME\_FGFR\_LIGAND\_BINDING\_AND\_ACTIVATION;REACTOME\_FGFR2C

\_METABOLISM

.LULAR\_MATRIX\_INTERACTIONS;REACTOME\_CELL\_JUNCTION\_ORGANIZATION;REACTOME\_

\_NEK2A

REGULATION\_OF\_INSULIN\_SECRETION\_BY\_ACETYLCHOLINE;REACTOME\_G\_BETA\_GAMMA

ACTIVATED\_TAK1\_MEDIATES\_P38\_MAPK\_ACTIVATION;REACTOME\_SIGNALING

.ING\_IN\_IMMUNE\_SYSTEM

ACTOME\_GPCR\_DOWNSTREAM\_SIGNALING;REACTOME\_RAS\_ACTIVATION\_UOPN\_CA2\_INFUX\_

\_E2F1;REACTOME\_DNA\_REPLICATION;REACTOME\_E2F\_MEDIATED\_REGULATION\_OF\_DNA\_

\_INTEGRATION\_OF\_ENERGY\_METABOLISM;REACTOME\_OPIOID\_SIGNALLING;REACTOME\_PI





\_CARBOHYDRATES;REACTOME\_INFLUENZA\_LIFE\_CYCLE;REACTOME\_NEP\_NS2\_INTERACT

SIGNALING\_BY\_PDGF;REACTOME\_DOWNSTREAM\_SIGNAL\_TRANSDUCTION;REACTOME\_AC  
INTEGRATION\_OF\_ENERGY\_METABOLISM;REACTOME\_CELL\_CYCLE\_MITOTIC;REACTOME\_



EX;REACTOME\_MAP\_KINASE\_ACTIVATION\_IN\_TLR\_CASCADE;REACTOME\_JNK\_C\_JUN\_KINASE



.UCAGON\_SIGNALING\_IN\_METABOLIC\_REGULATION;REACTOME\_SIGNALING\_BY\_PDGF;REA

SIGNALOSOME;REACTOME\_SIGNALING\_BY\_PDGF;REACTOME\_DOWNSTREAM\_SIGNAL\_TRA  
SIGNALOSOME;REACTOME\_SIGNALING\_BY\_PDGF;REACTOME\_DOWNSTREAM\_SIGNAL\_TRA

IC\_G1\_G1\_S\_PHASES;REACTOME\_MITOTIC\_M\_M\_G1\_PHASES;REACTOME\_ASSEMBLY\_OF\_

T\_E\_DIFFERENTIATION

SPHOLIPID\_METABOLISM;REACTOME\_GASTRIN\_CREB\_SIGNALLING\_PATHWAY\_VIA\_PKC\_AI





3NALING\_BY\_TGF\_BETA\_RECEPTOR\_COMPLEX  
\_ALPHA\_BETA\_PATHWAYS;REACTOME\_APOPTOSIS;REACTOME\_MYD88\_MAL\_CASCADE\_INI







SPHOLIPID\_METABOLISM;REACTOME\_GASTRIN\_CREB\_SIGNALLING\_PATHWAY\_VIA\_PKC\_AI  
SPHOLIPID\_METABOLISM;REACTOME\_GASTRIN\_CREB\_SIGNALLING\_PATHWAY\_VIA\_PKC\_AI

DIATED\_ANTIGEN\_PROCESSING\_PRESENTATION

IGNALING;REACTOME\_G\_ALPHA\_I\_SIGNALLING\_EVENTS;REACTOME\_G\_ALPHA\_S\_SIGNALLING

<\_ACTIVATION\_EVENTS;REACTOME\_SIGNALLING\_TO\_RAS;REACTOME\_CELL\_SURFACE\_INT  
LC\_BETA\_MEDIATED\_EVENTS;REACTOME\_ELEVATION\_OF\_CYTOSOLIC\_CA2\_LEVELS;REAC





√APTIC\_CELL;REACTOME\_PLC\_BETA\_MEDIATED\_EVENTS;REACTOME\_SIGNALING\_BY\_PDG

√ACTOME\_DNA\_STRAND\_ELONGATION





CTOME\_METABOLISM\_OF\_CARBOHYDRATES

OME\_EXTENSION\_OF\_TELOMERES;REACTOME\_G2\_M\_CHECKPOINTS;REACTOME\_S\_PHAS

ACTOME\_DNA\_REPAIR;REACTOME\_RNA\_POL\_II\_PRE\_TRANSCRIPTION\_EVENTS;REACTOME

.THOGENESIS







LLING\_TO\_ERKS;REACTOME\_SIGNALING\_BY\_FGFR\_IN\_DISEASE;REACTOME\_SIGNALLING\_1

.R4\_SIGNALING\_REPERTOIRE;REACTOME\_MYD88\_MAL\_CASCADE\_INITIATED\_ON\_PLASMA\_

CTOME\_TRANSCRIPTIONAL\_REGULATION\_OF\_WHITE\_ADIPOCYTE\_DIFFERENTIATION



1A\_SIGNALLING\_THROUGH\_PLC\_BETA;REACTOME\_GPCR\_DOWNSTREAM\_SIGNALING;REAC

T\_E\_DIFFERENTIATION  
T\_E\_DIFFERENTIATION

P0PROTEINS;REACTOME\_FATTY\_ACID\_TRIACYLGLYCEROL\_AND\_KETONE\_BODY\_METABOL



PHOSPHORYLATION\_OF\_CYCLIN\_B;REACTOME\_CONVERSION\_FROM\_APC\_C\_CDC20\_TO\_APC\_C\_CDH1\_I

OME\_DOWNSTREAM\_SIGNAL\_TRANSDUCTION;REACTOME\_CD28\_CO\_STIMULATION;REACTO





TE\_DIFFERENTIATION

1E\_GAB1\_SIGNALOSOME;REACTOME\_REGULATION\_OF\_APOPTOSIS;REACTOME\_SIGNALING

XON\_GUIDANCE;REACTOME\_ACTIVATION\_OF\_NMDA\_RECEPTOR\_UPON\_Glutamate\_BINDING

ICADE;REACTOME\_CD28\_CO-STIMULATION;REACTOME\_CD28\_DEPENDENT\_VAV1\_PATHWAY



=\_CARBOHYDRATES;REACTOME\_INFLUENZA\_LIFE\_CYCLE;REACTOME\_NEP\_NS2\_INTERACT

OME\_NEGATIVE\_REGULATION\_OF\_THE\_PI3K\_AKT\_NETWORK;REACTOME\_PI3K\_AKT\_ACTIV

ALING\_IN\_IMMUNE\_SYSTEM

TE\_DIFFERENTIATION





IGNALING;REACTOME\_INTERFERON\_SIGNALING;REACTOME\_IL\_6\_SIGNALING;REACTOME\_I

;FR\_IN\_DISEASE;REACTOME\_SIGNALLING\_TO\_P38\_VIA\_RIT\_AND\_RIN;REACTOME\_GASTRIN





\_SIGNALING  
\_SIGNALING

\_CELL\_SURFACE\_INTERACTIONS\_AT\_THE\_VASCULAR\_WALL;REACTOME\_NGF\_SIGNALLING



LC\_BETA\_MEDIATED\_EVENTS;REACTOME\_ELEVATION\_OF\_CYTOSOLIC\_CA2\_LEVELS;REAC





ME\_NEUROTRANSMITTER\_RECEPTOR\_BINDING\_AND\_DOWNSTREAM\_TRANSMISSION\_IN\_

OLISM\_OF\_AMINO\_ACIDS\_AND\_DERIVATIVES;REACTOME\_REGULATION\_OF\_ORNITHINE\_DE  
IC\_G1\_G1\_S\_PHASES;REACTOME\_MITOTIC\_M\_M\_G1\_PHASES;REACTOME\_ASSEMBLY\_OF\_

HC\_MEDIATED\_CASCADE;REACTOME\_L1CAM\_INTERACTIONS;REACTOME\_SIGNAL\_TRANSD  
HC\_MEDIATED\_CASCADE;REACTOME\_L1CAM\_INTERACTIONS;REACTOME\_SIGNAL\_TRANSD





OME\_DOWNSTREAM\_SIGNAL\_TRANSDUCTION;REACTOME\_CD28\_CO\_STIMULATION;REACTO





OLISM\_OF\_AMINO\_ACIDS\_AND\_DERIVATIVES;REACTOME\_REGULATION\_OF\_ORNITHINE\_DE

ANSMISSION\_IN\_THE\_POSTSYNAPTIC\_CELL;REACTOME\_AXON\_GUIDANCE;REACTOME\_TR.

Ξ\_TRAF6\_MEDIATED\_INDUCION\_OF\_NFKB\_AND\_MAP\_KINASES\_UPON\_TLR7\_8\_OR\_9\_ACTI

1E\_GAB1\_SIGNALOSOME;REACTOME\_NRAGE\_SIGNALS\_DEATH\_THROUGH\_JNK;REACTOME

\_REPLICATION;REACTOME\_TELOMERE\_MAINTENANCE;REACTOME\_EXTENSION\_OF\_TELOM

REACTOME\_G2\_M\_DNA\_DAMAGE\_CHECKPOINT

CTIONS\_OF\_HIV\_FACTORS;REACTOME\_INNATE\_IMMUNE\_SYSTEM;REACTOME\_THE\_ROLE\_

ME\_NEUROTRANSMITTER\_RECEPTOR\_BINDING\_AND\_DOWNSTREAM\_TRANSMISSION\_IN\_

OME\_EXTENSION\_OF\_TELOMERES;REACTOME\_G2\_M\_CHECKPOINTS;REACTOME\_S\_PHAS



/1A\_TRKA\_FROM\_THE\_PLASMA\_MEMBRANE;REACTOME\_SIGNALING\_BY\_FGFR\_IN\_DISEASE

1A\_SIGNALLING\_THROUGH\_PLC\_BETA;REACTOME\_GPCR\_DOWNSTREAM\_SIGNALING;REAC





FACTOR\_HIF\_BY\_OXYGEN;REACTOME\_GENERIC\_TRANSCRIPTION\_PATHWAY;REACTOME\_I  
FACTOR\_HIF\_BY\_OXYGEN;REACTOME\_GENERIC\_TRANSCRIPTION\_PATHWAY;REACTOME\_I  
FACTOR\_HIF\_BY\_OXYGEN;REACTOME\_GENERIC\_TRANSCRIPTION\_PATHWAY;REACTOME\_I  
ME\_NEUROTRANSMITTER\_RECEPTOR\_BINDING\_AND\_DOWNSTREAM\_TRANSMISSION\_IN\_



=\_CARBOHYDRATES;REACTOME\_INFLUENZA\_LIFE\_CYCLE;REACTOME\_NEP\_NS2\_INTERACT  
=\_CARBOHYDRATES;REACTOME\_INFLUENZA\_LIFE\_CYCLE;REACTOME\_NEP\_NS2\_INTERACT

REST\_AND\_RECOVERY;REACTOME\_FORMATION\_OF\_TRANSCRIPTION\_COUPLED\_NER\_TC

IVITY;REACTOME\_GENERIC\_TRANSCRIPTION\_PATHWAY;REACTOME\_METABOLISM\_OF\_LIF  
IVITY;REACTOME\_GENERIC\_TRANSCRIPTION\_PATHWAY;REACTOME\_METABOLISM\_OF\_LIF

ANSMISSION\_IN\_THE\_POSTSYNAPTIC\_CELL;REACTOME\_AXON\_GUIDANCE;REACTOME\_TR,





LEOTIDE\_EXCISION\_REPAIR;REACTOME\_FORMATION\_OF\_RNA\_POL\_II\_ELONGATION\_COM

\_DOWNSTREAM\_SIGNALING;REACTOME\_CD28\_DEPENDENT\_VAV1\_PATHWAY;REACTOME\_



OME\_LOSS\_OF\_NLP\_FROM\_MITOTIC\_CENTROSOMES;REACTOME\_PLG\_BETA\_MEDIATED\_E\

RAND\_SYNTHESIS;REACTOME\_DNA\_REPLICATION;REACTOME\_TELOMERE\_MAINTENANCE;  
RAND\_SYNTHESIS;REACTOME\_DNA\_REPLICATION;REACTOME\_TELOMERE\_MAINTENANCE;  
RAND\_SYNTHESIS;REACTOME\_DNA\_REPLICATION;REACTOME\_TELOMERE\_MAINTENANCE;

A\_FROM\_THE\_PLASMA\_MEMBRANE;REACTOME\_SIGNALLING\_TO\_ERKS;REACTOME\_SIGNA

REACTOME\_GPCR\_LIGAND\_BINDING;REACTOME\_PLATELET\_HOMEOSTASIS;REACTOME\_AG  
REACTOME\_GPCR\_LIGAND\_BINDING;REACTOME\_PLATELET\_HOMEOSTASIS;REACTOME\_AG

BINDING;REACTOME\_TRAF6\_MEDIATED\_NFKB\_ACTIVATION;REACTOME\_TRAF6\_MEDIATED\_

ACTOME\_DNA\_STRAND\_ELONGATION











SPHOLIPID\_METABOLISM;REACTOME\_GASTRIN\_CREB\_SIGNALLING\_PATHWAY\_VIA\_PKC\_AI

NFECTON;REACTOME\_HOST\_INTERACTIONS\_OF\_HIV\_FACTORS;REACTOME\_THE\_ROLE\_O

/IA\_TRKA\_FROM\_THE\_PLASMA\_MEMBRANE;REACTOME\_SIGNALING\_BY\_FGFR\_IN\_DISEASE

LING\_BY\_ILS;REACTOME\_IL1\_SIGNALING;REACTOME\_IRAK1\_RECRUITS\_IKK\_COMPLEX;REA

REACTIONS;REACTOME\_PLATELET\_AGGREGATION\_PLUG\_FORMATION;REACTOME\_APOPTO

ME\_SIGNALING\_BY\_FGFR;REACTOME\_PI3K\_CASCADE

LING\_BY\_ILS;REACTOME\_IL1\_SIGNALING;REACTOME\_IRAK1\_RECRUITS\_IKK\_COMPLEX;REA

DESCRIPTION\_AND\_REPLICATION;REACTOME\_NONSENSE\_MEDIATED\_DECAY\_ENHANCED\_BY\_

MEDIATED\_ANTIGEN\_PROCESSING\_PRESENTATION





ME\_ADP\_SIGNALLING\_THROUGH\_P2RY12;REACTOME\_GABA\_B\_RECEPTOR\_ACTIVATION;R

ATION\_OF\_CYCLIN\_B;REACTOME\_CONVERSION\_FROM\_APC\_C\_CDC20\_TO\_APC\_C\_CDH1\_I

OSTASIS;REACTOME\_IMMUNE\_SYSTEM;REACTOME\_CYTOKINE\_SIGNALING\_IN\_IMMUNE\_SY:

:X;REACTOME\_MAP\_KINASE\_ACTIVATION\_IN\_TLR\_CASCADE;REACTOME\_JNK\_C\_JUN\_KINA:





!EACTOME\_PLATELET\_ACTIVATION\_SIGNALING\_AND\_AGGREGATION

;REACTOME\_SIGNAL\_TRANSDUCTION\_BY\_L1;REACTOME\_RECYCLING\_PATHWAY\_OF\_L1;RI

DIATED\_ANTIGEN\_PROCESSING\_PRESENTATION

REACTOME\_G2\_M\_DNA\_DAMAGE\_CHECKPOINT

<\_ACTIVATION\_EVENTS;REACTOME\_SIGNALLING\_TO\_RAS;REACTOME\_CELL\_SURFACE\_INT





=\_CARBOHYDRATES;REACTOME\_INFLUENZA\_LIFE\_CYCLE;REACTOME\_NEP\_NS2\_INTERACT



SPHOLIPID\_METABOLISM;REACTOME\_GASTRIN\_CREB\_SIGNALLING\_PATHWAY\_VIA\_PKC\_AI

C\_LIGAND\_BINDING\_AND\_ACTIVATION;REACTOME\_FGFR4\_LIGAND\_BINDING\_AND\_ACTIVAT

.L1CAM\_INTERACTIONS;REACTOME\_SIGNAL\_TRANSDUCTION\_BY\_L1;REACTOME\_HEMOSTA

1A\_SIGNALLING\_THROUGH\_PLC\_BETA;REACTOME\_GPCR\_DOWNSTREAM\_SIGNALING;REAC

LING\_BY\_ILS;REACTOME\_IL1\_SIGNALING;REACTOME\_IRAK1\_RECRUITS\_IKK\_COMPLEX;REA

.THROUGH\_NMDA\_RECEPTOR;REACTOME\_ACTIVATION\_OF\_NMDA\_RECEPTOR\_UPON\_GLU

\_REPLICATION;REACTOME\_TELOMERE\_MAINTENANCE;REACTOME\_EXTENSION\_OF\_TELOM

LC\_BETA\_MEDIATED\_EVENTS;REACTOME\_ELEVATION\_OF\_CYTOSOLIC\_CA2\_LEVELS;REAC





'S\_WITH\_THE\_CELLULAR\_EXPORT\_MACHINERY;REACTOME\_HIV\_INFECTION;REACTOME\_TI

STIVATION\_OF\_NMDA\_RECEPTOR\_UPON\_Glutamate\_BINDING\_AND\_POSTSYNAPTIC\_EVE  
\_OPIOID\_SIGNALLING;REACTOME\_DARPP\_32\_EVENTS;REACTOME\_G1\_PHASE;REACTOME\_C



SES\_PHOSPHORYLATION\_AND\_ACTIVATION\_MEDIATED\_BY\_ACTIVATED\_HUMAN\_TAK1;REA



.CTOME\_DOWNSTREAM\_SIGNAL\_TRANSDUCTION;REACTOME\_REGULATION\_OF\_INSULIN\_S

INDUCTION;REACTOME\_CD28\_CO\_STIMULATION;REACTOME\_COSTIMULATION\_BY\_THE\_C  
INDUCTION;REACTOME\_CD28\_CO\_STIMULATION;REACTOME\_COSTIMULATION\_BY\_THE\_C

THE\_PRE\_REPLICATIVE\_COMPLEX;REACTOME\_DNA\_REPLICATION;REACTOME\_E2F\_MEDIA

ND\_MAPK;REACTOME\_SIGNALING\_BY\_FGFR1\_MUTANTS;REACTOME\_SYNTHESIS\_OF\_PIPS\_





INITIATED\_ON\_PLASMA\_MEMBRANE;REACTOME\_INNATE\_IMMUNE\_SYSTEM;REACTOME\_ACTI







ND\_MAPK;REACTOME\_SIGNALING\_BY\_FGFR1\_MUTANTS;REACTOME\_SYNTHESIS\_OF\_PIPS.  
ND\_MAPK;REACTOME\_SIGNALING\_BY\_FGFR1\_MUTANTS;REACTOME\_SYNTHESIS\_OF\_PIPS.

;-EVENTS;REACTOME\_G\_ALPHA\_Z\_SIGNALLING\_EVENTS;REACTOME\_SIGNAL\_AMPLIFICATI

REACTIONS\_AT\_THE\_VASCULAR\_WALL;REACTOME\_NGF\_SIGNALLING\_VIA\_TRKA\_FROM\_T  
TOME\_SIGNALING\_BY\_PDGF;REACTOME\_DOWNSTREAM\_SIGNAL\_TRANSDUCTION;REACTC





F;REACTOME\_DOWNSTREAM\_SIGNAL\_TRANSDUCTION;REACTOME\_TRAFFICKING\_OF\_AMF





E;REACTOME\_DNA\_STRAND\_ELONGATION

≡\_GLOBAL\_GENOMIC\_NER\_GG\_NER;REACTOME\_FORMATION\_OF\_INCISION\_COMPLEX\_IN\_()









RO\_P38\_VIA\_RIT\_AND\_RIN;REACTOME\_GASTRIN\_CREB\_SIGNALLING\_PATHWAY\_VIA\_PKC\_A

MEMBRANE;REACTOME\_INNATE\_IMMUNE\_SYSTEM;REACTOME\_ACTIVATED\_TLR4\_SIGNALL









N\_LATE\_ANAPHASE;REACTOME\_IMMUNE\_SYSTEM;REACTOME\_PHOSPHORYLATION\_OF\_TI

OME\_COSTIMULATION\_BY\_THE\_CD28\_FAMILY;REACTOME\_CD28\_DEPENDENT\_PI3K\_AKT\_SI







3\_BY\_PDGF;REACTOME\_DOWNSTREAM\_SIGNAL\_TRANSDUCTION;REACTOME\_PI\_3K\_CASC.

ING\_AND\_POSTSYNAPTIC\_EVENTS;REACTOME\_CREB\_PHOSPHORYLATION\_THROUGH\_TH

Y;REACTOME\_PD1\_SIGNALING;REACTOME\_COSTIMULATION\_BY\_THE\_CD28\_FAMILY;REAC



'S\_WITH\_THE\_CELLULAR\_EXPORT\_MACHINERY;REACTOME\_HIV\_INFECTION;REACTOME\_TI

ATION;REACTOME\_AKT\_PHOSPHORYLATES\_TARGETS\_IN\_THE\_CYTOSOL;REACTOME\_GAB





MMUNE\_SYSTEM;REACTOME\_CYTOKINE\_SIGNALING\_IN\_IMMUNE\_SYSTEM

I\_CREB\_SIGNALLING\_PATHWAY\_VIA\_PKC\_AND\_MAPK;REACTOME\_SHC1\_EVENTS\_IN\_EGFR







3\_VIA\_TRKA\_FROM\_THE\_PLASMA\_MEMBRANE;REACTOME\_SIGNALING\_BY\_FGFR\_IN\_DISEA



TOME\_SIGNALING\_BY\_PDGF;REACTOME\_DOWNSTREAM\_SIGNAL\_TRANSDUCTION;REACTC





THE\_POSTSYNAPTIC\_CELL;REACTOME\_PLC\_BETA\_MEDIATED\_EVENTS;REACTOME\_PKA\_M

CARBOXYLASE\_ODC;REACTOME\_REGULATION\_OF\_APOPTOSIS;REACTOME\_CELL\_CYCLE\_  
THE\_PRE\_REPLICATIVE\_COMPLEX;REACTOME\_DNA\_REPLICATION;REACTOME\_E2F\_MEDIA

DUCTION\_BY\_L1;REACTOME\_SIGNALING\_BY\_INSULIN\_RECEPTOR;REACTOME\_FGFR\_LIGAN  
DUCTION\_BY\_L1;REACTOME\_SIGNALING\_BY\_INSULIN\_RECEPTOR;REACTOME\_FGFR\_LIGAN





DME\_COSTIMULATION\_BY\_THE\_CD28\_FAMILY;REACTOME\_CD28\_DEPENDENT\_PI3K\_AKT\_SI





CARBOXYLASE\_ODC;REACTOME\_REGULATION\_OF\_APOPTOSIS;REACTOME\_CELL\_CYCLE\_

AFFICKING\_OF\_AMPA\_RECEPTORS;REACTOME\_TRAFFICKING\_OF\_GLUR2\_CONTAINING\_AM

IVATION;REACTOME\_ADVANCED\_GLYCOSYLATION\_ENDPRODUCT\_RECEPTOR\_SIGNALING;

\_CELL\_DEATH\_SIGNALLING\_VIA\_NRAGE\_NRIF\_AND\_NADE;REACTOME\_P75\_NTR\_RECEPTC

IERES;REACTOME\_S\_PHASE;REACTOME\_DNA\_STRAND\_ELONGATION

.OF\_NEF\_IN\_HIV1\_REPLICATION\_AND\_DISEASE\_PATHOGENESIS;REACTOME\_IMMUNE\_SYS`

THE\_POSTSYNAPTIC\_CELL;REACTOME\_PLC\_BETA\_MEDIATED\_EVENTS;REACTOME\_PKA\_M

E;REACTOME\_DNA\_STRAND\_ELONGATION



;REACTOME\_ENOS\_ACTIVATION\_AND\_REGULATION;REACTOME\_NEGATIVE\_REGULATION\_!

;TOME\_G\_PROTEIN\_BETA\_GAMMA\_SIGNALLING;REACTOME\_ACTIVATION\_OF\_KAINATE\_RE





NOTCH\_HLH\_TRANSCRIPTION\_PATHWAY;REACTOME\_METABOLISM\_OF\_LIPIDS\_AND\_LIPOF  
NOTCH\_HLH\_TRANSCRIPTION\_PATHWAY;REACTOME\_METABOLISM\_OF\_LIPIDS\_AND\_LIPOF  
NOTCH\_HLH\_TRANSCRIPTION\_PATHWAY;REACTOME\_METABOLISM\_OF\_LIPIDS\_AND\_LIPOF  
THE\_POSTSYNAPTIC\_CELL;REACTOME\_PLC\_BETA\_MEDIATED\_EVENTS;REACTOME\_PKA\_M



'S\_WITH\_THE\_CELLULAR\_EXPORT\_MACHINERY;REACTOME\_HIV\_INFECTION;REACTOME\_TI  
'S\_WITH\_THE\_CELLULAR\_EXPORT\_MACHINERY;REACTOME\_HIV\_INFECTION;REACTOME\_TI

;\_NER\_REPAIR\_COMPLEX;REACTOME\_DNA\_REPAIR;REACTOME\_RNA\_POL\_II\_PRE\_TRANSC

'IDS\_AND\_LIOPROTEINS;REACTOME\_FATTY\_ACID\_TRIACYLGLYCEROL\_AND\_KETONE\_BOI  
'IDS\_AND\_LIOPROTEINS;REACTOME\_FATTY\_ACID\_TRIACYLGLYCEROL\_AND\_KETONE\_BOI

AFFICKING\_OF\_AMPA\_RECEPTORS;REACTOME\_TRAFFICKING\_OF\_GLUR2\_CONTAINING\_AM





PLEX\_;REACTOME\_ELONGATION\_ARREST\_AND\_RECOVERY;REACTOME\_FORMATION\_OF\_1

\_COSTIMULATION\_BY\_THE\_CD28\_FAMILY;REACTOME\_SIGNALING\_BY\_ILS;REACTOME\_REGI



/ENTS;REACTOME\_PKA\_MEDIATED\_PHOSPHORYLATION\_OF\_CREB;REACTOME\_TRANSMEN

;REACTOME\_REMOVAL\_OF\_THE\_FLAP\_INTERMEDIATE\_FROM\_THE\_C\_STRAND;REACTOME  
;REACTOME\_REMOVAL\_OF\_THE\_FLAP\_INTERMEDIATE\_FROM\_THE\_C\_STRAND;REACTOME  
;REACTOME\_REMOVAL\_OF\_THE\_FLAP\_INTERMEDIATE\_FROM\_THE\_C\_STRAND;REACTOME



UAPORIN\_MEDIATED\_TRANSPORT;REACTOME\_PROSTACYCLIN\_SIGNALLING\_THROUGH\_P  
UAPORIN\_MEDIATED\_TRANSPORT;REACTOME\_PROSTACYCLIN\_SIGNALLING\_THROUGH\_P

\_INDUCTION\_OF\_NFKB\_AND\_MAP\_KINASES\_UPON\_TLR7\_8\_OR\_9\_ACTIVATION;REACTOME\_













ND\_MAPK;REACTOME\_SIGNALING\_BY\_FGFR1\_MUTANTS;REACTOME\_SYNTHESIS\_OF\_PIPS\_

F\_NEF\_IN\_HIV1\_REPLICATION\_AND\_DISEASE\_PATHOGENESIS;REACTOME\_IMMUNE\_SYSTE

;REACTOME\_ENOS\_ACTIVATION\_AND\_REGULATION;REACTOME\_NEGATIVE\_REGULATION\_1

.CTOME\_TRAF6\_MEDIATED\_INDUCION\_OF\_NFKB\_AND\_MAP\_KINASES\_UPON\_TLR7\_8\_OR\_

SIS;REACTOME\_HEMOSTASIS;REACTOME\_PLATELET\_ACTIVATION\_SIGNALING\_AND\_AGGR

.CTOME\_TRAF6\_MEDIATED\_INDUCION\_OF\_NFKB\_AND\_MAP\_KINASES\_UPON\_TLR7\_8\_OR\_

THE\_EXON\_JUNCTION\_COMPLEX





REACTOME\_GABA\_RECEPTOR\_ACTIVATION;REACTOME\_HEMOSTASIS;REACTOME\_PLATELE

TH\_LATE\_ANAPHASE;REACTOME\_IMMUNE\_SYSTEM;REACTOME\_PHOSPHORYLATION\_OF\_TF

STEM

SES\_PHOSPHORYLATION\_AND\_ACTIVATION\_MEDIATED\_BY\_ACTIVATED\_HUMAN\_TAK1;REA







EACTOME\_INFLUENZA\_LIFE\_CYCLE;REACTOME\_IMMUNE\_SYSTEM;REACTOME\_ADAPTIVE\_I



REACTIONS\_AT\_THE\_VASCULAR\_WALL;REACTOME\_NGF\_SIGNALLING\_VIA\_TRKA\_FROM\_T





'S\_WITH\_THE\_CELLULAR\_EXPORT\_MACHINERY;REACTOME\_HIV\_INFECTION;REACTOME\_TI



ND\_MAPK;REACTOME\_SIGNALING\_BY\_FGFR1\_MUTANTS;REACTOME\_SYNTHESIS\_OF\_PIPS\_

ION;REACTOME\_SIGNALING\_BY\_FGFR;REACTOME\_PI3K\_CASCADE

\\SIS;REACTOME\_IMMUNE\_SYSTEM;REACTOME\_ADAPTIVE\_IMMUNE\_SYSTEM

ACTOME\_G\_PROTEIN\_BETA\_GAMMA\_SIGNALLING;REACTOME\_ACTIVATION\_OF\_KAINATE\_RE

ACTOME\_TRAF6\_MEDIATED\_INDUCTION\_OF\_NFKB\_AND\_MAP\_KINASES\_UPON\_TLR7\_8\_OR\_

TAMATE\_BINDING\_AND\_POSTSYNAPTIC\_EVENTS;REACTOME\_CREB\_PHOSPHORYLATION\_

IERES;REACTOME\_S\_PHASE;REACTOME\_DNA\_STRAND\_ELONGATION

TOME\_SIGNALING\_BY\_PDGF;REACTOME\_DOWNSTREAM\_SIGNAL\_TRANSDUCTION;REACTC





RANSPORT\_OF\_RIBONUCLEOPROTEINS\_INTO\_THE\_HOST\_NUCLEUS;REACTOME\_HIV\_LIFE\_

NTS;REACTOME\_POST\_NMDA\_RECEPTOR\_ACTIVATION\_EVENTS;REACTOME\_DOWNSTREA  
31\_S\_TRANSITION;REACTOME\_COSTIMULATION\_BY\_THE\_CD28\_FAMILY;REACTOME\_CTLA4



REACTOME\_ACTIVATED\_TAK1\_MEDIATES\_P38\_MAPK\_ACTIVATION;REACTOME\_SIGNALING\_BY\_



;SECRETION\_BY\_GLUCAGON\_LIKE\_PEPTIDE1;REACTOME\_REGULATION\_OF\_INSULIN\_SECRE

;D28\_FAMILY;REACTOME\_CD28\_DEPENDENT\_PI3K\_AKT\_SIGNALING;REACTOME\_PI\_3K\_CAS  
;D28\_FAMILY;REACTOME\_CD28\_DEPENDENT\_PI3K\_AKT\_SIGNALING;REACTOME\_PI\_3K\_CAS

TED\_REGULATION\_OF\_DNA\_REPLICATION;REACTOME\_ACTIVATION\_OF\_ATR\_IN\_RESPONS

\_AT\_THE\_PLASMA\_MEMBRANE;REACTOME\_SIGNALING\_BY\_FGFR1\_FUSION\_MUTANTS;REA





VATED\_TLR4\_SIGNALLING;REACTOME\_IMMUNE\_SYSTEM;REACTOME\_TOLL\_RECEPTOR\_CA







\_AT\_THE\_PLASMA\_MEMBRANE;REACTOME\_SIGNALING\_BY\_FGFR1\_FUSION\_MUTANTS;REA  
\_AT\_THE\_PLASMA\_MEMBRANE;REACTOME\_SIGNALING\_BY\_FGFR1\_FUSION\_MUTANTS;REA

ON;REACTOME\_ADP\_SIGNALLING\_THROUGH\_P2RY12;REACTOME\_GABA\_B\_RECEPTOR\_AC

HE\_PLASMA\_MEMBRANE;REACTOME\_SIGNALLING\_TO\_ERKS;REACTOME\_P38MAPK\_EVENT  
ME\_REGULATION\_OF\_INSULIN\_SECRETION\_BY\_GLCAGON\_LIKE\_PEPTIDE1;REACTOME\_C





'A\_RECEPTORS;REACTOME\_TRAFFICKING\_OF\_GLUR2\_CONTAINING\_AMPA\_RECEPTORS;RE







GG\_NER;REACTOME\_HIV\_INFECTION;REACTOME\_HIV\_LIFE\_CYCLE;REACTOME\_FORMATIOI









ND\_MAPK;REACTOME\_SHC1\_EVENTS\_IN\_EGFR\_SIGNALING;REACTOME\_SIGNALING\_BY\_GI

ING;REACTOME\_IMMUNE\_SYSTEM;REACTOME\_TOLL\_RECEPTOR\_CASCADES





CEPTORS\_UPON\_Glutamate\_BINDING

CTOME\_FACTORS\_INVOLVED\_IN\_MEGAKARYOCYTE\_DEVELOPMENT\_AND\_PLATELET\_PRO



-IE\_APC\_C;REACTOME\_ADAPTIVE\_IMMUNE\_SYSTEM;REACTOME\_CLASS\_I\_MHC\_MEDIATED

IGNALING;REACTOME\_PI\_3K\_CASCADE;REACTOME\_DOWNSTREAM\_SIGNALING\_OF\_ACTIV/







ADE;REACTOME\_DOWNSTREAM\_SIGNALING\_OF\_ACTIVATED\_FGFR;REACTOME\_ROLE\_OF\_

E\_ACTIVATION\_OF\_RAS;REACTOME\_POST\_NMDA\_RECEPTOR\_ACTIVATION\_EVENTS;REAC

TOME\_CD28\_DEPENDENT\_PI3K\_AKT\_SIGNALING;REACTOME\_CTLA4\_INHIBITORY\_SIGNALIN



RANSPORT\_OF\_RIBONUCLEOPROTEINS\_INTO\_THE\_HOST\_NUCLEUS;REACTOME\_HIV\_LIFE\_

1\_SIGNALOSOME;REACTOME\_REGULATION\_OF\_BETA\_CELL\_DEVELOPMENT;REACTOME\_R







:\_SIGNALING;REACTOME\_TRANSMISSION\_ACROSS\_CHEMICAL\_SYNAPSES;REACTOME\_NEU







SE;REACTOME\_PHOSPHOLIPID\_METABOLISM;REACTOME\_GASTRIN\_CREB\_SIGNALLING\_PA



NAME\_REGULATION\_OF\_INSULIN\_SECRETION\_BY\_GLCAGON\_LIKE\_PEPTIDE1;REACTOME\_G





EDIATED\_PHOSPHORYLATION\_OF\_CREB;REACTOME\_TRANSMEMBRANE\_TRANSPORT\_OF\_

MITOTIC;REACTOME\_CELL\_CYCLE\_CHECKPOINTS;REACTOME\_CYCLIN\_E\_ASSOCIATED\_EV  
TED\_REGULATION\_OF\_DNA\_REPLICATION;REACTOME\_ACTIVATION\_OF\_ATR\_IN\_RESPONS

D\_BINDING\_AND\_ACTIVATION;REACTOME\_SIGNALING\_BY\_FGFR;REACTOME\_FGFR1\_LIGAN  
D\_BINDING\_AND\_ACTIVATION;REACTOME\_SIGNALING\_BY\_FGFR;REACTOME\_FGFR1\_LIGAN





IGNALING;REACTOME\_PI\_3K\_CASCADE;REACTOME\_DOWNSTREAM\_SIGNALING\_OF\_ACTIV/





MITOTIC;REACTOME\_CELL\_CYCLE\_CHECKPOINTS;REACTOME\_CYCLIN\_E\_ASSOCIATED\_EV

MPA\_RECEPTORS;REACTOME\_L1CAM\_INTERACTIONS;REACTOME\_SIGNAL\_TRANSDUCTION

REACTOME\_NFKB\_AND\_MAP\_KINASES\_ACTIVATION\_MEDIATED\_BY\_TLR4\_SIGNALING\_REP

R\_MEDIATED\_SIGNALLING;REACTOME\_SIGNALING\_BY\_PDGF;REACTOME\_DOWNSTREAM\_



TEM;REACTOME\_BINDING\_AND\_ENTRY\_OF\_HIV\_VIRION;REACTOME\_ADAPTIVE\_IMMUNE\_S'

EDIATED\_PHOSPHORYLATION\_OF\_CREB;REACTOME\_TRANSMEMBRANE\_TRANSPORT\_OF\_





OF\_THE\_PI3K\_AKT\_NETWORK;REACTOME\_PI3K\_AKT\_ACTIVATION;REACTOME\_AKT\_PHOSF

CEPTORS\_UPON\_Glutamate\_BINDING





'ROTEINS;REACTOME\_FATTY\_ACID\_TRIACYLGLYCEROL\_AND\_KETONE\_BODY\_METABOLISM  
'ROTEINS;REACTOME\_FATTY\_ACID\_TRIACYLGLYCEROL\_AND\_KETONE\_BODY\_METABOLISM  
'ROTEINS;REACTOME\_FATTY\_ACID\_TRIACYLGLYCEROL\_AND\_KETONE\_BODY\_METABOLISM  
EDIATED\_PHOSPHORYLATION\_OF\_CREB;REACTOME\_TRANSMEMBRANE\_TRANSPORT\_OF\_



RANSPORT\_OF\_RIBONUCLEOPROTEINS\_INTO\_THE\_HOST\_NUCLEUS;REACTOME\_HIV\_LIFE\_

RIPTION\_EVENTS;REACTOME\_INFLUENZA\_LIFE\_CYCLE;REACTOME\_INFLUENZA\_VIRAL\_RN,

DY\_METABOLISM;REACTOME\_CIRCADIAN\_CLOCK;REACTOME\_TRANSCRIPTIONAL\_REGULA  
DY\_METABOLISM;REACTOME\_CIRCADIAN\_CLOCK;REACTOME\_TRANSCRIPTIONAL\_REGULA

MPA\_RECEPTORS;REACTOME\_L1CAM\_INTERACTIONS;REACTOME\_SIGNAL\_TRANSDUCTION





TRANSCRIPTION\_COUPLED\_NER\_TC\_NER\_REPAIR\_COMPLEX;REACTOME\_RNA\_POL\_I\_RNA

REGULATION\_OF\_SIGNALING\_BY\_CBL;REACTOME\_IL\_3\_5\_AND\_GM-CSF\_SIGNALING;REACTOME



/BRANE\_TRANSPORT\_OF\_SMALL\_MOLECULES;REACTOME\_GLCAGON\_SIGNALING\_IN\_ME

\_EXTENSION\_OF\_TELOMERES;REACTOME\_S\_PHASE;REACTOME\_DNA\_STRAND\_ELONGATI  
\_EXTENSION\_OF\_TELOMERES;REACTOME\_S\_PHASE;REACTOME\_DNA\_STRAND\_ELONGATI  
\_EXTENSION\_OF\_TELOMERES;REACTOME\_S\_PHASE;REACTOME\_DNA\_STRAND\_ELONGATI



ROSTACYCLIN\_RECEPTOR;REACTOME\_REGULATION\_OF\_WATER\_BALANCE\_BY\_RENAL\_AC  
ROSTACYCLIN\_RECEPTOR;REACTOME\_REGULATION\_OF\_WATER\_BALANCE\_BY\_RENAL\_AC

.ADVANCED\_GLYCOSYLATION\_ENDPRODUCT\_RECEPTOR\_SIGNALING;REACTOME\_NFKB\_A













\_AT\_THE\_PLASMA\_MEMBRANE;REACTOME\_SIGNALING\_BY\_FGFR1\_FUSION\_MUTANTS;REA

:M;REACTOME\_ADAPTIVE\_IMMUNE\_SYSTEM;REACTOME\_CYTOKINE\_SIGNALING\_IN\_IMMUNI

OF\_THE\_PI3K\_AKT\_NETWORK;REACTOME\_PI3K\_AKT\_ACTIVATION;REACTOME\_AKT\_PHOSF

9\_ACTIVATION;REACTOME\_TRAF6\_MEDIATED\_IRF7\_ACTIVATION\_IN\_TLR7\_8\_OR\_9\_SIGNAL

EGATION;REACTOME\_APOPTOTIC\_EXECUTION\_PHASE

9\_ACTIVATION;REACTOME\_TRAF6\_MEDIATED\_IRF7\_ACTIVATION\_IN\_TLR7\_8\_OR\_9\_SIGNAL







T\_ACTIVATION\_SIGNALING\_AND\_AGGREGATION

-IE\_APC\_C;REACTOME\_ADAPTIVE\_IMMUNE\_SYSTEM;REACTOME\_CLASS\_I\_MHC\_MEDIATED

REACTOME\_ACTIVATED\_TAK1\_MEDIATES\_P38\_MAPK\_ACTIVATION;REACTOME\_SIGNALING\_BY\_







MMUNE\_SYSTEM;REACTOME\_GAP\_JUNCTION\_TRAFFICKING



HE\_PLASMA\_MEMBRANE;REACTOME\_SIGNALLING\_TO\_ERKS;REACTOME\_P38MAPK\_EVENT





RANSPORT\_OF\_RIBONUCLEOPROTEINS\_INTO\_THE\_HOST\_NUCLEUS;REACTOME\_HIV\_LIFE\_



\_AT\_THE\_PLASMA\_MEMBRANE;REACTOME\_SIGNALING\_BY\_FGFR1\_FUSION\_MUTANTS;REA



CEPTORS\_UPON\_Glutamate\_BINDING

9\_ACTIVATION;REACTOME\_TRAF6\_MEDIATED\_IRF7\_ACTIVATION\_IN\_TLR7\_8\_OR\_9\_SIGNAL

THROUGH\_THE\_ACTIVATION\_OF\_RAS;REACTOME\_POST\_NMDA\_RECEPTOR\_ACTIVATION\_E

HOME\_REGULATION\_OF\_INSULIN\_SECRETION\_BY\_GLCAGON\_LIKE\_PEPTIDE1;REACTOME\_C





\_CYCLE;REACTOME\_HOST\_INTERACTIONS\_OF\_HIV\_FACTORS;REACTOME\_LATE\_PHASE\_OI

M\_SIGNALING\_OF\_ACTIVATED\_FGFR;REACTOME\_PHOSPHOLIPASE\_C\_MEDIATED\_CASCAD  
.INHIBITORY\_SIGNALING;REACTOME\_METABOLISM\_OF\_MRNA;REACTOME\_METABOLISM\_C



\_ILS;REACTOME\_IL1\_SIGNALING;REACTOME\_IRAK1\_RECRUITS\_IKK\_COMPLEX;REACTOME\_



CTION;REACTOME\_DOWNSTREAM\_SIGNALING\_OF\_ACTIVATED\_FGFR;REACTOME\_PHOSPHO

CADE;REACTOME\_DOWNSTREAM\_SIGNALING\_OF\_ACTIVATED\_FGFR;REACTOME\_PKB\_MEI  
CADE;REACTOME\_DOWNSTREAM\_SIGNALING\_OF\_ACTIVATED\_FGFR;REACTOME\_PKB\_MEI

E\_TO\_REPLICATION\_STRESS;REACTOME\_G1\_S\_SPECIFIC\_TRANSCRIPTION;REACTOME\_G2

CTOME\_PI\_METABOLISM;REACTOME\_SIGNALING\_BY\_FGFR\_MUTANTS;REACTOME\_PI3K\_AK





\\SCADES;REACTOME\_APOPTOTIC\_EXECUTION\_PHASE







CTOME\_PI\_METABOLISM;REACTOME\_SIGNALING\_BY\_FGFR\_MUTANTS;REACTOME\_PI3K\_Ak  
CTOME\_PI\_METABOLISM;REACTOME\_SIGNALING\_BY\_FGFR\_MUTANTS;REACTOME\_PI3K\_Ak

;TIVATION;REACTOME\_GABA\_RECEPTOR\_ACTIVATION;REACTOME\_HEMOSTASIS;REACTOM

'S;REACTOME\_SIGNALING\_BY\_FGFR\_IN\_DISEASE;REACTOME\_SIGNALLING\_TO\_P38\_VIA\_RI  
;\_ALPHA\_Q\_SIGNALLING\_EVENTS;REACTOME\_REGULATION\_OF\_INSULIN\_SECRETION;REA





REACTOME\_GPCR\_DOWNSTREAM\_SIGNALING;REACTOME\_G\_ALPHA\_Z\_SIGNALLING\_EVENT:







V\_OF\_THE\_HIV1\_EARLY\_ELONGATION\_COMPLEX;REACTOME\_LATE\_PHASE\_OF\_HIV\_LIFE\_C









PCR;REACTOME\_SIGNALING\_BY\_PDGF;REACTOME\_DOWNSTREAM\_SIGNAL\_TRANSDUCTIO





DUCTION;REACTOME\_TRAF3\_DEPENDENT\_IRF\_ACTIVATION\_PATHWAY;REACTOME\_RIG\_I\_



\_ANTIGEN\_PROCESSING\_PRESENTATION;REACTOME\_ANTIGEN\_PROCESSING\_UBIQUITINA

ATED\_FGFR;REACTOME\_IMMUNE\_SYSTEM;REACTOME\_ADAPTIVE\_IMMUNE\_SYSTEM;REACT







.DCC\_IN\_REGULATING\_APOPTOSIS;REACTOME\_APOPTOSIS;REACTOME\_INNATE\_IMMUNE\_

TOME\_MAP\_KINASE\_ACTIVATION\_IN\_TLR\_CASCADE;REACTOME\_MAPK\_TARGETS\_NUCLEA

G;REACTOME\_SIGNALING\_BY\_ILS;REACTOME\_IL\_2\_SIGNALING;REACTOME\_HEMOSTASIS;F



\_CYCLE;REACTOME\_HOST\_INTERACTIONS\_OF\_HIV\_FACTORS;REACTOME\_LATE\_PHASE\_OI

REGULATION\_OF\_GENE\_EXPRESSION\_IN\_BETA\_CELLS;REACTOME\_SIGNALING\_BY\_GPCR;R







JRONAL\_SYSTEM;REACTOME\_SIGNALING\_BY\_GPCR;REACTOME\_NEUROTRANSMITTER\_RE







PATHWAY\_VIA\_PKC\_AND\_MAPK;REACTOME\_SIGNALING\_BY\_FGFR1\_MUTANTS;REACTOME\_S



3\_ALPHA\_Q\_SIGNALLING\_EVENTS;REACTOME\_REGULATION\_OF\_INSULIN\_SECRETION;REA



REACTOME\_CYTOKINE\_SIGNALING\_IN\_IMMUNE\_SYSTEM;REACTOME\_NUCLEOTIDE\_BINDING.

\_SMALL\_MOLECULES;REACTOME\_GLUCAGON\_SIGNALING\_IN\_METABOLIC\_REGULATION;RE

'ENTS\_DURING\_G1\_S\_TRANSITION\_';REACTOME\_P53\_DEPENDENT\_G1\_DNA\_DAMAGE\_RESF  
E\_TO\_REPLICATION\_STRESS;REACTOME\_G2\_M\_CHECKPOINTS;REACTOME\_S\_PHASE

ID\_BINDING\_AND\_ACTIVATION;REACTOME\_PI3K\_CASCADE  
ID\_BINDING\_AND\_ACTIVATION;REACTOME\_PI3K\_CASCADE





ATED\_FGFR;REACTOME\_IMMUNE\_SYSTEM;REACTOME\_ADAPTIVE\_IMMUNE\_SYSTEM;REACT





'ENTS\_DURING\_G1\_S\_TRANSITION\_;REACTOME\_P53\_DEPENDENT\_G1\_DNA\_DAMAGE\_RESF

[\_BY\_L1;REACTOME\_RECYCLING\_PATHWAY\_OF\_L1;REACTOME\_HIV\_INFECTION;REACTOME

ERTOIRE;REACTOME\_RIG\_I\_MDA5\_MEDIATED\_INDUCTION\_OF\_IFN\_ALPHA\_BETA\_PATHWA

SIGNAL\_TRANSDUCTION;REACTOME\_PI\_3K\_CASCADE;REACTOME\_DOWNSTREAM\_SIGNAL



YSTEM

.SMALL\_MOLECULES;REACTOME\_GLCAGON\_SIGNALING\_IN\_METABOLIC\_REGULATION;RE





'HORYLATES\_TARGETS\_IN\_THE\_CYTOSOL;REACTOME\_GAB1\_SIGNALOSOME;REACTOME\_I





4;REACTOME\_TRAF6\_MEDIATED\_IRF7\_ACTIVATION;REACTOME\_CIRCADIAN\_CLOCK;REACT  
4;REACTOME\_TRAF6\_MEDIATED\_IRF7\_ACTIVATION;REACTOME\_CIRCADIAN\_CLOCK;REACT  
4;REACTOME\_TRAF6\_MEDIATED\_IRF7\_ACTIVATION;REACTOME\_CIRCADIAN\_CLOCK;REACT  
\_SMALL\_MOLECULES;REACTOME\_GLUCAGON\_SIGNALING\_IN\_METABOLIC\_REGULATION;RE



\_CYCLE;REACTOME\_HOST\_INTERACTIONS\_OF\_HIV\_FACTORS;REACTOME\_LATE\_PHASE\_OI  
\_CYCLE;REACTOME\_HOST\_INTERACTIONS\_OF\_HIV\_FACTORS;REACTOME\_LATE\_PHASE\_OI

A\_TRANSCRIPTION\_AND\_REPLICATION;REACTOME\_HIV\_INFECTION;REACTOME\_HIV\_LIFE\_C

TION\_OF\_WHITE\_ADIPOCYTE\_DIFFERENTIATION;REACTOME\_SIGNALING\_BY\_NOTCH;REAC  
TION\_OF\_WHITE\_ADIPOCYTE\_DIFFERENTIATION;REACTOME\_SIGNALING\_BY\_NOTCH;REAC

\_BY\_L1;REACTOME\_RECYCLING\_PATHWAY\_OF\_L1;REACTOME\_HIV\_INFECTION;REACTOME





\_POL\_III\_AND\_MITOCHONDRIAL\_TRANSCRIPTION;REACTOME\_DNA\_REPAIR;REACTOME\_RN

\_HEMOSTASIS;REACTOME\_IMMUNE\_SYSTEM;REACTOME\_ADAPTIVE\_IMMUNE\_SYSTEM;RE



TABOLIC\_REGULATION;REACTOME\_SIGNALING\_BY\_PDGF;REACTOME\_DOWNSTREAM\_SIGI

ON  
ON  
ON



QUAPORINS;REACTOME\_HEMOSTASIS  
QUAPORINS;REACTOME\_HEMOSTASIS

ND\_MAP\_KINASES\_ACTIVATION\_MEDIATED\_BY\_TLR4\_SIGNALING\_REPERTOIRE;REACTOME













CTOME\_PI\_METABOLISM;REACTOME\_SIGNALING\_BY\_FGFR\_MUTANTS;REACTOME\_PI3K\_AK

E\_SYSTEM;REACTOME\_ANTIGEN\_PRESENTATION\_FOLDING\_ASSEMBLY\_AND\_PEPTIDE\_LO,

'HORYLATES\_TARGETS\_IN\_THE\_CYTOSOL;REACTOME\_GAB1\_SIGNALOSOME;REACTOME\_I

ING;REACTOME\_NFKB\_AND\_MAP\_KINASES\_ACTIVATION\_MEDIATED\_BY\_TLR4\_SIGNALING\_



ING;REACTOME\_NFKB\_AND\_MAP\_KINASES\_ACTIVATION\_MEDIATED\_BY\_TLR4\_SIGNALING\_







\_ANTIGEN\_PROCESSING\_PRESENTATION;REACTOME\_ANTIGEN\_PROCESSING\_UBIQUITINA

\_ILS;REACTOME\_IL1\_SIGNALING;REACTOME\_IRAK1\_RECRUITS\_IKK\_COMPLEX;REACTOME\_











'S;REACTOME\_SIGNALING\_BY\_FGFR\_IN\_DISEASE;REACTOME\_SIGNALLING\_TO\_P38\_VIA\_RI'





\_CYCLE;REACTOME\_HOST\_INTERACTIONS\_OF\_HIV\_FACTORS;REACTOME\_LATE\_PHASE\_OI



CTOME\_PI\_METABOLISM;REACTOME\_SIGNALING\_BY\_FGFR\_MUTANTS;REACTOME\_PI3K\_AK





EVENTS

3\_ALPHA\_Q\_SIGNALLING\_EVENTS;REACTOME\_REGULATION\_OF\_INSULIN\_SECRETION;REA





F\_HIV\_LIFE\_CYCLE;REACTOME\_INTERACTIONS\_OF\_VPR\_WITH\_HOST\_CELLULAR\_PROTEIN

RE;REACTOME\_SIGNALING\_BY\_FGFR

OF\_RNA;REACTOME\_MITOTIC\_G1\_G1\_S\_PHASES;REACTOME\_MITOTIC\_M\_M\_G1\_PHASES;RI



TRAF6\_MEDIATED\_IRF7\_ACTIVATION;REACTOME\_TRAF6\_MEDIATED\_NFKB\_ACTIVATION;RE



LIPASE\_C\_MEDIATED\_CASCADE;REACTOME\_AQUAPORIN\_MEDIATED\_TRANSPORT;REACT

DIATED\_EVENTS;REACTOME\_SIGNALING\_BY\_INSULIN\_RECEPTOR;REACTOME\_IMMUNE\_SY  
DIATED\_EVENTS;REACTOME\_SIGNALING\_BY\_INSULIN\_RECEPTOR;REACTOME\_IMMUNE\_SY

?\_M\_CHECKPOINTS;REACTOME\_S\_PHASE

CT\_ACTIVATION;REACTOME\_TCR\_SIGNALING;REACTOME\_DOWNSTREAM\_TCR\_SIGNALING;













CT\_ACTIVATION;REACTOME\_TCR\_SIGNALING;REACTOME\_DOWNSTREAM\_TCR\_SIGNALING;  
CT\_ACTIVATION;REACTOME\_TCR\_SIGNALING;REACTOME\_DOWNSTREAM\_TCR\_SIGNALING;

1E\_PLATELET\_ACTIVATION\_SIGNALING\_AND\_AGGREGATION

T\_AND\_RIN;REACTOME\_GASTRIN\_CREB\_SIGNALLING\_PATHWAY\_VIA\_PKC\_AND\_MAPK;REA  
CTOME\_GPCR\_DOWNSTREAM\_SIGNALING;REACTOME\_DOWNSTREAM\_SIGNALING\_OF\_ACT1





S;REACTOME\_DOWNSTREAM\_SIGNALING\_OF\_ACTIVATED\_FGFR;REACTOME\_PHOSPHOLIP







CYCLE;REACTOME\_RNA\_POL\_I\_TRANSCRIPTION\_INITIATION









IN;REACTOME\_AXON\_GUIDANCE;REACTOME\_NCAM\_SIGNALING\_FOR\_NEURITE\_OUT\_GROW





.MDA5\_MEDIATED\_INDUCTION\_OF\_IFN\_ALPHA\_BETA\_PATHWAYS;REACTOME\_TRANSCRIPT



ATION\_PROTEASOME\_DEGRADATION;REACTOME\_APC\_CDC20\_MEDIATED\_DEGRADATION\_C

HOME\_PIP3\_ACTIVATES\_AKT\_SIGNALING;REACTOME\_SIGNALING\_BY\_FGFR







SYSTEM;REACTOME\_IMMUNE\_SYSTEM;REACTOME\_ADAPTIVE\_IMMUNE\_SYSTEM;REACTOM

R\_EVENTS\_MEDIATED\_BY\_MAP\_KINASES;REACTOME\_L1CAM\_INTERACTIONS;REACTOME\_

REACTOME\_HIV\_INFECTION;REACTOME\_HOST\_INTERACTIONS\_OF\_HIV\_FACTORS;REACTOI



F\_HIV\_LIFE\_CYCLE;REACTOME\_INTERACTIONS\_OF\_VPR\_WITH\_HOST\_CELLULAR\_PROTEIN

:EACTOME\_SIGNALING\_BY\_PDGF;REACTOME\_GPVI\_MEDIATED\_ACTIVATION\_CASCADE;REA







CEPTOR\_BINDING\_AND\_DOWNSTREAM\_TRANSMISSION\_IN\_THE\_POSTSYNAPTIC\_CELL;RE,







YNTHESES\_OF\_PIPS\_AT\_THE\_PLASMA\_MEMBRANE;REACTOME\_SIGNALING\_BY\_FGFR1\_FUS



CTOME\_GPCR\_DOWNSTREAM\_SIGNALING;REACTOME\_DOWNSTREAM\_SIGNALING\_OF\_ACT1





REACTOME\_SIGNALING\_BY\_PDGF;REACTOME\_DOWNSTREAM\_SIGNAL\_TRANSDUCTION;REAC

RESPONSE;REACTOME\_M\_G1\_TRANSITION;REACTOME\_G1\_S\_TRANSITION;REACTOME\_CDT1\_A







HOME\_PIP3\_ACTIVATES\_AKT\_SIGNALING;REACTOME\_SIGNALING\_BY\_FGFR





RESPONSE;REACTOME\_M\_G1\_TRANSITION;REACTOME\_G1\_S\_TRANSITION;REACTOME\_CDT1\_A

:\_HOST\_INTERACTIONS\_OF\_HIV\_FACTORS;REACTOME\_THE\_ROLE\_OF\_NEF\_IN\_HIV1\_REPL

YS;REACTOME\_MYD88\_MAL\_CASCADE\_INITIATED\_ON\_PLASMA\_MEMBRANE;REACTOME\_IN

ING\_OF\_ACTIVATED\_FGFR;REACTOME\_APOPTOSIS;REACTOME\_IMMUNE\_SYSTEM;REACTC





REACTOME\_SIGNALING\_BY\_PDGF;REACTOME\_DOWNSTREAM\_SIGNAL\_TRANSDUCTION;REAC





NTEGRIN\_CELL\_SURFACE\_INTERACTIONS;REACTOME\_REGULATION\_OF\_BETA\_CELL\_DEVI





OME\_FACTORS\_INVOLVED\_IN\_MEGAKARYOCYTE\_DEVELOPMENT\_AND\_PLATELET\_PRODU  
OME\_FACTORS\_INVOLVED\_IN\_MEGAKARYOCYTE\_DEVELOPMENT\_AND\_PLATELET\_PRODU  
OME\_FACTORS\_INVOLVED\_IN\_MEGAKARYOCYTE\_DEVELOPMENT\_AND\_PLATELET\_PRODU  
:ACTOME\_SIGNALING\_BY\_PDGF;REACTOME\_DOWNSTREAM\_SIGNAL\_TRANSDUCTION;REAC



F\_HIV\_LIFE\_CYCLE;REACTOME\_INTERACTIONS\_OF\_VPR\_WITH\_HOST\_CELLULAR\_PROTEIN  
F\_HIV\_LIFE\_CYCLE;REACTOME\_INTERACTIONS\_OF\_VPR\_WITH\_HOST\_CELLULAR\_PROTEIN

CYCLE;REACTOME\_ABORTIVE\_ELONGATION\_OF\_HIV1\_TRANSCRIPT\_IN\_THE\_ABSENCE\_OF

TOME\_SIGNALING\_BY\_TGF\_BETA\_RECEPTOR\_COMPLEX  
TOME\_SIGNALING\_BY\_TGF\_BETA\_RECEPTOR\_COMPLEX

:\_HOST\_INTERACTIONS\_OF\_HIV\_FACTORS;REACTOME\_THE\_ROLE\_OF\_NEF\_IN\_HIV1\_REPL





IA\_POL\_II\_PRE\_TRANSCRIPTION\_EVENTS;REACTOME\_RNA\_POL\_III\_TRANSCRIPTION\_INITIA

:ACTOME\_CYTOKINE\_SIGNALING\_IN\_IMMUNE\_SYSTEM;REACTOME\_PLATELET\_ACTIVATION



VAL\_TRANSDUCTION;REACTOME\_REGULATION\_OF\_INSULIN\_SECRETION\_BY\_GLCAGON\_





:\_RIG\_I\_MDA5\_MEDIATED\_INDUCTION\_OF\_IFN\_ALPHA\_BETA\_PATHWAYS;REACTOME\_HEMK













CT\_ACTIVATION;REACTOME\_TCR\_SIGNALING;REACTOME\_DOWNSTREAM\_TCR\_SIGNALING;

ADING\_OF\_CLASS\_I\_MHC;REACTOME\_CLASS\_I\_MHC\_MEDIATED\_ANTIGEN\_PROCESSING\_F

NTEGRIN\_CELL\_SURFACE\_INTERACTIONS;REACTOME\_REGULATION\_OF\_BETA\_CELL\_DEVI

REPertoire;REACTOME\_MYD88\_MAL\_CASCADE\_INITIATED\_ON\_PLASMA\_MEMBRANE;REA



REPertoire;REACTOME\_MYD88\_MAL\_CASCADE\_INITIATED\_ON\_PLASMA\_MEMBRANE;REA







ATION\_PROTEASOME\_DEGRADATION;REACTOME\_APC\_CDC20\_MEDIATED\_DEGRADATION\_C

TRAF6\_MEDIATED\_IRF7\_ACTIVATION;REACTOME\_TRAF6\_MEDIATED\_NFKB\_ACTIVATION;RE











T\_AND\_RIN;REACTOME\_GASTRIN\_CREB\_SIGNALLING\_PATHWAY\_VIA\_PKC\_AND\_MAPK;REA





F\_HIV\_LIFE\_CYCLE;REACTOME\_INTERACTIONS\_OF\_VPR\_WITH\_HOST\_CELLULAR\_PROTEIN

KT\_PHOSPHORYLATES\_TARGETS\_IN\_THE\_CYTOSOL;REACTOME\_GAB1\_SIGNALOSOME;RE/

CT\_ACTIVATION;REACTOME\_TCR\_SIGNALING;REACTOME\_DOWNSTREAM\_TCR\_SIGNALING;



REPertoire;REACTOME\_MYD88\_MAL\_CASCADE\_INITIATED\_ON\_PLASMA\_MEMBRANE;REA



CTOME\_GPCR\_DOWNSTREAM\_SIGNALING;REACTOME\_DOWNSTREAM\_SIGNALING\_OF\_ACT1





IS;REACTOME\_REGULATION\_OF\_GLUCOKINASE\_BY\_GLUCOKINASE\_REGULATORY\_PROTEI

EACTOME\_MAP\_KINASE\_ACTIVATION\_IN\_TLR\_CASCADE;REACTOME\_MAPK\_TARGETS\_NUC



FACTOME\_IRAK2\_MEDIATED\_ACTIVATION\_OF\_TAK1\_COMPLEX\_UPON\_TLR7\_8\_OR\_9\_STIMU



OME\_REGULATION\_OF\_WATER\_BALANCE\_BY\_RENAL\_AQUAPORINS;REACTOME\_FACTORS

STEM;REACTOME\_MTORC1\_MEDIATED\_SIGNALLING;REACTOME\_ADAPTIVE\_IMMUNE\_SYST  
STEM;REACTOME\_MTORC1\_MEDIATED\_SIGNALLING;REACTOME\_ADAPTIVE\_IMMUNE\_SYST

REACTOME\_GAB1\_SIGNALOSOME;REACTOME\_TIE2\_SIGNALING;REACTOME\_SIGNALING\_BY













REACTOME\_GAB1\_SIGNALOSOME;REACTOME\_TIE2\_SIGNALING;REACTOME\_SIGNALING\_B1  
REACTOME\_GAB1\_SIGNALOSOME;REACTOME\_TIE2\_SIGNALING;REACTOME\_SIGNALING\_B1



REACTOME\_SIGNALING\_BY\_FGFR\_MUTANTS;REACTOME\_SHC1\_EVENTS\_IN\_EGFR\_SIGNALING  
ACTIVATED\_FGFR;REACTOME\_PHOSPHOLIPASE\_C\_MEDIATED\_CASCADE;REACTOME\_EFFECT





ASE\_C\_MEDIATED\_CASCADE;REACTOME\_HEMOSTASIS;REACTOME\_PLATELET\_ACTIVATIOI

















WTH;REACTOME\_FRS2\_MEDIATED\_CASCADE;REACTOME\_DOWNSTREAM\_SIGNALING\_OF\_#





TIONAL\_REGULATION\_OF\_WHITE\_ADIPOCYTE\_DIFFERENTIATION;REACTOME\_SIGNALING\_B



DF\_NEK2A









ME\_NOD1\_2\_SIGNALING\_PATHWAY;REACTOME\_PIP3\_ACTIVATES\_AKT\_SIGNALING;REACTO

SIGNAL\_TRANSDUCTION\_BY\_L1;REACTOME\_RECYCLING\_PATHWAY\_OF\_L1;REACTOME\_TR

ME\_THE\_ROLE\_OF\_NEF\_IN\_HIV1\_REPLICATION\_AND\_DISEASE\_PATHOGENESIS;REACTOME



IS;REACTOME\_REGULATION\_OF\_GLUCOKINASE\_BY\_GLUCOKINASE\_REGULATORY\_PROTEI

ACTOME\_DOWNSTREAM\_SIGNAL\_TRANSDUCTION;REACTOME\_CD28\_CO\_STIMULATION;RE/







ACTOME\_SIGNALING\_BY\_PDGF;REACTOME\_DOWNSTREAM\_SIGNAL\_TRANSDUCTION;REAC







SION\_MUTANTS;REACTOME\_PI\_METABOLISM;REACTOME\_SIGNALING\_BY\_FGFR\_MUTANTS;



ACTIVATED\_FGFR;REACTOME\_PHOSPHOLIPASE\_C\_MEDIATED\_CASCADE;REACTOME\_EFFECT





CTOME\_GPCR\_DOWNSTREAM\_SIGNALING;REACTOME\_G\_ALPHA\_I\_SIGNALLING\_EVENTS;RI

ASSOCIATION\_WITH\_THE\_CDC6\_ORC\_ORIGIN\_COMPLEX;REACTOME\_SYNTHESIS\_OF\_DNA;













ASSOCIATION\_WITH\_THE\_CDC6\_ORC\_ORIGIN\_COMPLEX;REACTOME\_SYNTHESIS\_OF\_DNA;

ICATION\_AND\_DISEASE\_PATHOGENESIS;REACTOME\_IMMUNE\_SYSTEM;REACTOME\_ADAPT

NATE\_IMMUNE\_SYSTEM;REACTOME\_ACTIVATED\_TLR4\_SIGNALLING;REACTOME\_IMMUNE\_S

ME\_ACTIVATION\_OF\_BH3\_ONLY\_PROTEINS;REACTOME\_ADAPTIVE\_IMMUNE\_SYSTEM;REAC





OTOME\_REGULATION\_OF\_INSULIN\_SECRETION\_BY\_GLCAGON\_LIKE\_PEPTIDE1;REACTOMI





ELOPMENT;REACTOME\_REGULATION\_OF\_GENE\_EXPRESSION\_IN\_BETA\_CELLS;REACTOME





CTION;REACTOME\_TRAF3\_DEPENDENT\_IRF\_ACTIVATION\_PATHWAY;REACTOME\_RIG\_I\_MD  
CTION;REACTOME\_TRAF3\_DEPENDENT\_IRF\_ACTIVATION\_PATHWAY;REACTOME\_RIG\_I\_MD  
CTION;REACTOME\_TRAF3\_DEPENDENT\_IRF\_ACTIVATION\_PATHWAY;REACTOME\_RIG\_I\_MD  
CTOME\_GPCR\_DOWNSTREAM\_SIGNALING;REACTOME\_G\_ALPHA\_I\_SIGNALLING\_EVENTS;RI



IS;REACTOME\_REGULATION\_OF\_GLUCOKINASE\_BY\_GLUCOKINASE\_REGULATORY\_PROTEI  
IS;REACTOME\_REGULATION\_OF\_GLUCOKINASE\_BY\_GLUCOKINASE\_REGULATORY\_PROTEI

\_TAT;REACTOME\_FORMATION\_OF\_THE\_HIV1\_EARLY\_ELONGATION\_COMPLEX;REACTOME\_

.ICATION\_AND\_DISEASE\_PATHOGENESIS;REACTOME\_IMMUNE\_SYSTEM;REACTOME\_ADAPT





ATION\_FROM\_TYPE\_3\_PROMOTER;REACTOME\_INFLUENZA\_LIFE\_CYCLE;REACTOME\_INFLUI

I\_SIGNALING\_AND\_AGGREGATION



LIKE\_PEPTIDE1;REACTOME\_REGULATION\_OF\_INSULIN\_SECRETION;REACTOME\_DOWNSTR





DSTASIS;REACTOME\_MYD88\_MAL\_CASCADE\_INITIATED\_ON\_PLASMA\_MEMBRANE;REACTOI













REACTOME\_GAB1\_SIGNALOSOME;REACTOME\_TIE2\_SIGNALING;REACTOME\_SIGNALING\_B1

PRESENTATION

ELOPMENT;REACTOME\_REGULATION\_OF\_GENE\_EXPRESSION\_IN\_BETA\_CELLS;REACTOME

.CTOME\_INNATE\_IMMUNE\_SYSTEM;REACTOME\_ACTIVATED\_TLR4\_SIGNALLING;REACTOME



.CTOME\_INNATE\_IMMUNE\_SYSTEM;REACTOME\_ACTIVATED\_TLR4\_SIGNALLING;REACTOME







DF\_NEK2A

FACTOME\_IRAK2\_MEDIATED\_ACTIVATION\_OF\_TAK1\_COMPLEX\_UPON\_TLR7\_8\_OR\_9\_STIMU











.CTOME\_SIGNALING\_BY\_FGFR\_MUTANTS;REACTOME\_SHC1\_EVENTS\_IN\_EGFR\_SIGNALING





IS;REACTOME\_REGULATION\_OF\_GLUCOKINASE\_BY\_GLUCOKINASE\_REGULATORY\_PROTEI



REACTOME\_GAB1\_SIGNALOSOME;REACTOME\_TIE2\_SIGNALING;REACTOME\_SIGNALING\_B1



.CTOME\_INNATE\_IMMUNE\_SYSTEM;REACTOME\_ACTIVATED\_TLR4\_SIGNALLING;REACTOME.



ACTIVATED\_FGFR;REACTOME\_PHOSPHOLIPASE\_C\_MEDIATED\_CASCADE;REACTOME\_EFFECT





N;REACTOME\_IMMUNE\_SYSTEM;REACTOME\_CYTOKINE\_SIGNALING\_IN\_IMMUNE\_SYSTEM

;LEAR\_EVENTS\_MEDIATED\_BY\_MAP\_KINASES;REACTOME\_PLATELET\_HOMEOSTASIS;REAC



RELATION;REACTOME\_TRAF6\_MEDIATED\_INDUCION\_OF\_NFKB\_AND\_MAP\_KINASES\_UPON\_



;INVOLVED\_IN\_MEGAKARYOCYTE\_DEVELOPMENT\_AND\_PLATELET\_PRODUCTION;REACTC

EM;REACTOME\_PIP3\_ACTIVATES\_AKT\_SIGNALING;REACTOME\_SIGNALING\_BY\_FGFR;REAC  
EM;REACTOME\_PIP3\_ACTIVATES\_AKT\_SIGNALING;REACTOME\_SIGNALING\_BY\_FGFR;REAC

/\_GPCR;REACTOME\_SIGNALING\_BY\_PDGF;REACTOME\_GPVI\_MEDIATED\_ACTIVATION\_CAS













/\_GPCR;REACTOME\_SIGNALING\_BY\_PDGF;REACTOME\_GPVI\_MEDIATED\_ACTIVATION\_CAS  
/\_GPCR;REACTOME\_SIGNALING\_BY\_PDGF;REACTOME\_GPVI\_MEDIATED\_ACTIVATION\_CAS



;REACTOME\_TIE2\_SIGNALING;REACTOME\_SIGNALING\_BY\_GPCR;REACTOME\_SIGNALING\_B  
'S\_OF\_PIP2\_HYDROLYSIS;REACTOME\_PLATELET\_HOMEOSTASIS;REACTOME\_PLATELET\_C/





N\_SIGNALING\_AND\_AGGREGATION;REACTOME\_SIGNALING\_BY\_FGFR

















ACTIVATED\_FGFR;REACTOME\_MAP\_KINASE\_ACTIVATION\_IN\_TLR\_CASCADE;REACTOME\_L1





RY\_NOTCH;REACTOME\_HEMOSTASIS;REACTOME\_INNATE\_IMMUNE\_SYSTEM;REACTOME\_IM













ME\_NUCLEOTIDE\_BINDING\_DOMAIN\_LEUCINE\_RICH\_REPEAT\_CONTAINING\_RECEPTOR\_NL

AF6\_MEDIATED\_INDUCION\_OF\_NFKB\_AND\_MAP\_KINASES\_UPON\_TLR7\_8\_OR\_9\_ACTIVATI

:\_IMMUNE\_SYSTEM;REACTOME\_ADAPTIVE\_IMMUNE\_SYSTEM;REACTOME\_CYTOKINE\_SIGN.



N;REACTOME\_IMMUNE\_SYSTEM;REACTOME\_CYTOKINE\_SIGNALING\_IN\_IMMUNE\_SYSTEM

ACTOME\_GPCR\_DOWNSTREAM\_SIGNALING;REACTOME\_G\_BETA\_GAMMA\_SIGNALLING\_THI







;TOME\_AXON\_GUIDANCE;REACTOME\_NCAM\_SIGNALING\_FOR\_NEURITE\_OUT\_GROWTH;RE







REACTOME\_PI3K\_AKT\_ACTIVATION;REACTOME\_TCR\_SIGNALING;REACTOME\_DOWNSTREA



'S\_OF\_PIP2\_HYDROLYSIS;REACTOME\_PLATELET\_HOMEOSTASIS;REACTOME\_PLATELET\_C/





EACTOME\_G\_ALPHA\_S\_SIGNALLING\_EVENTS;REACTOME\_G\_ALPHA\_Z\_SIGNALLING\_EVENT

REACTOME\_AUTODEGRADATION\_OF\_THE\_E3\_UBIQUITIN\_LIGASE\_COP1;REACTOME\_META













REACTOME\_AUTODEGRADATION\_OF\_THE\_E3\_UBIQUITIN\_LIGASE\_COP1;REACTOME\_META

TIVE\_IMMUNE\_SYSTEM

SYSTEM;REACTOME\_TOLL\_RECEPTOR\_CASCADES;REACTOME\_AMYLOIDS

CTOME\_PIP3\_ACTIVATES\_AKT\_SIGNALING;REACTOME\_SIGNALING\_BY\_FGFR;REACTOME\_IN





E\_REGULATION\_OF\_INSULIN\_SECRETION;REACTOME\_INHIBITION\_OF\_INSULIN\_SECRETION





:\_SIGNALING\_BY\_GPCR;REACTOME\_INTEGRIN\_ALPHAIIIB\_BETA3\_SIGNALING;REACTOME\_SI





IA5\_MEDIATED\_INDUCTION\_OF\_IFN\_ALPHA\_BETA\_PATHWAYS;REACTOME\_TRANSCRIPTION  
IA5\_MEDIATED\_INDUCTION\_OF\_IFN\_ALPHA\_BETA\_PATHWAYS;REACTOME\_TRANSCRIPTION  
IA5\_MEDIATED\_INDUCTION\_OF\_IFN\_ALPHA\_BETA\_PATHWAYS;REACTOME\_TRANSCRIPTION  
EACTOME\_G\_ALPHA\_S\_SIGNALLING\_EVENTS;REACTOME\_G\_ALPHA\_Z\_SIGNALLING\_EVENT



N;REACTOME\_IMMUNE\_SYSTEM;REACTOME\_CYTOKINE\_SIGNALING\_IN\_IMMUNE\_SYSTEM  
N;REACTOME\_IMMUNE\_SYSTEM;REACTOME\_CYTOKINE\_SIGNALING\_IN\_IMMUNE\_SYSTEM

\_VIRAL\_MESSENGER\_RNA\_SYNTHESIS;REACTOME\_LATE\_PHASE\_OF\_HIV\_LIFE\_CYCLE

IVE\_IMMUNE\_SYSTEM





ENZA\_VIRAL\_RNA\_TRANSCRIPTION\_AND\_REPLICATION;REACTOME\_HIV\_INFECTION;REACT



!EAM\_SIGNALING\_OF\_ACTIVATED\_FGFR;REACTOME\_PHOSPHOLIPASE\_C\_MEDIATED\_CASC





VE\_INNATE\_IMMUNE\_SYSTEM;REACTOME\_ACTIVATED\_TLR4\_SIGNALLING;REACTOME\_IMM













/\_GPCR;REACTOME\_SIGNALING\_BY\_PDGF;REACTOME\_GPVI\_MEDIATED\_ACTIVATION\_CAS

:\_SIGNALING\_BY\_GPCR;REACTOME\_INTEGRIN\_ALPHAIIIB\_BETA3\_SIGNALING;REACTOME\_SI

\_IMMUNE\_SYSTEM;REACTOME\_TOLL\_RECEPTOR\_CASCADES;REACTOME\_NOD1\_2\_SIGNAL



\_IMMUNE\_SYSTEM;REACTOME\_TOLL\_RECEPTOR\_CASCADES;REACTOME\_NOD1\_2\_SIGNAL









ILATION;REACTOME\_TRAF6\_MEDIATED\_INDUCION\_OF\_NFKB\_AND\_MAP\_KINASES\_UPON\_











;REACTOME\_TIE2\_SIGNALING;REACTOME\_SIGNALING\_BY\_GPCR;REACTOME\_SIGNALING\_E





N;REACTOME\_IMMUNE\_SYSTEM;REACTOME\_CYTOKINE\_SIGNALING\_IN\_IMMUNE\_SYSTEM

IE\_EXPRESSION\_IN\_BETA\_CELLS;REACTOME\_SIGNALING\_BY\_GPCR;REACTOME\_SIGNALIN

/\_GPCR;REACTOME\_SIGNALING\_BY\_PDGF;REACTOME\_GPVI\_MEDIATED\_ACTIVATION\_CAS



\_IMMUNE\_SYSTEM;REACTOME\_TOLL\_RECEPTOR\_CASCADES;REACTOME\_NOD1\_2\_SIGNAL



'S\_OF\_PIP2\_HYDROLYSIS;REACTOME\_PLATELET\_HOMEOSTASIS;REACTOME\_PLATELET\_C/





TOME\_PLATELET\_SE



TLR7\_8



ME\_HEMOSTASIS;REACTOME\_SIG

TOME\_PI3K\_CA  
TOME\_PI3K\_CA

CADE;REACT













CADE;REACT  
CADE;REACT



Y\_PDGF;REAC  
CALCIUM\_HOMEOSTASIS;R























CAM\_INTERACTIO





MUNE\_SYSTEM













R\_SIGNALING\_PATHW

ION;REACTOME\_NFKB\_AND\_MAP\_

ALING\_IN\_IMMUNE\_S





ROUGH\_PI3KGAMMA;REAC







ACTOME\_ACTIVATION\_







M\_TCR\_SIGNA



ALCIUM\_HOMEOSTASIS;R





'S;REACTOME\_ACTIVATION\_OF\_

BOLISM\_OF\_MRNA;REACTOME\_METABO













BOLISM\_OF\_MRNA;REACTOME\_METABO

INTRINSIC\_PATHWAY





I\_BY\_ADRENALINE\_NORADR





GNALING\_BY\_PDG





JAL\_REGULATION\_OF\_WHITE  
JAL\_REGULATION\_OF\_WHITE  
JAL\_REGULATION\_OF\_WHITE  
S;REACTOME\_DOWNSTREAM\_SIG











OME\_HIV\_LI



;ADE;REACTOME\_MITOTIC\_G2\_G





UNE\_SYSTEM;RE













CADE;REACT

GNALING\_BY\_PDG

.ING\_



.ING\_









TLR7\_8











Y\_PDF;REAC









CADE;REACT



.ING\_



ALCIUM\_HOMEOSTASIS;R
