# Supplementary material for: Genomic alterations caused by HPV integration in a cohort of Chinese endocervical adenocarcinomas
Source: PubMed Central journal article supplement (PMC8636260; doi:10.1038/s41417-020-00283-4), 2021-01-04
Supplement: 41417_2020_283_MOESM6_ESM.pdf [file 41417_2020_283_MOESM6_ESM.pdf]

## Supplementary Table 5

### Detail of somatic INDELS detected in each case by whole genome sequencing.

| Patient | CHF | POS      | ID        | REF      | ALT     | QUAL | FILTER | GeneName  | Func       |
|---------|-----|----------|-----------|----------|---------|------|--------|-----------|------------|
| ACa01   | 2   | 1.22E+08 | .         | AC       | A       | .    | PASS   | TFCP2L1   | intronic   |
| ACa01   | 2   | 2.05E+08 | .         | G        | GT      | .    | PASS   | CTLA4     | exonic     |
| ACa01   | 6   | 58777054 | rs6078884 | TTGGAG   | T       | .    | PASS   | .         | intergenic |
| ACa01   | 7   | 93623657 | .         | GTTT     | G       | .    | PASS   | BET1      | exonic     |
| ACa01   | 12  | 1.14E+08 | rs3773783 | T        | TC      | .    | PASS   | SLC8B1    | intronic   |
| ACa01   | 15  | 62173088 | .         | AT       | A       | .    | PASS   | VPS13C    | exonic     |
| ACa01   | 17  | 3030310  | .         | CAGA     | C       | .    | PASS   | OR1G1     | exonic     |
| ACa01   | 19  | 39760071 | .         | T        | TC      | .    | PASS   | IFNL2     | intronic   |
| ACa01   | 21  | 45668946 | .         | C        | CAG     | .    | PASS   | DNMT3L    | exonic     |
| ACa01   | X   | 53461076 | rs7821786 | T        | TAGAC   | .    | PASS   | HSD17B10  | intronic   |
| ACa02   | 5   | 10618545 | .         | ACACAGCA | A       | .    | PASS   | ANKRD33   | exonic     |
| ACa02   | 13  | 28973403 | rs9190283 | G        | GT      | .    | PASS   | FLT1      | intronic   |
| ACa02   | 14  | 69445857 | .         | T        | TTGGGC  | .    | PASS   | ACTN1     | UTR5       |
| ACa02   | 19  | 17397481 | rs7640343 | GTGTGTGG | G       | .    | PASS   | ANKLE1    | exonic     |
| ACa02   | 22  | 30734626 | rs5844903 | TC       | T       | .    | PASS   | SF3A1     | intronic   |
| ACa03   | 3   | 50005225 | .         | GGGGATIG | G       | .    | PASS   | RBM6      | exonic     |
| ACa04   | 2   | 33500956 | .         | CG       | C       | .    | PASS   | LTBP1     | exonic     |
| ACa04   | 3   | 1.96E+08 | .         | CGT      | C       | .    | PASS   | .         | intergenic |
| ACa04   | 16  | 23224248 | .         | GC       | G       | .    | PASS   | SCNN1G    | intronic   |
| ACa06   | 16  | 90233007 | .         | CCTCTTT  | C       | .    | PASS   | .         | ncRNA_int  |
| ACa06   | 17  | 6563152  | .         | C        | CTCTCTC | .    | PASS   | ALOX15P1  | ncRNA_int  |
| ACa06   | 17  | 72337184 | .         | CTG      | C       | .    | PASS   | KIF19     | intronic   |
| ACa07   | 1   | 889573   | rs7760984 | AC       | A       | .    | PASS   | NOC2L     | intronic   |
| ACa07   | 1   | 1078309  | rs9376078 | TC       | T       | .    | PASS   | LINC01342 | ncRNA_ex   |
| ACa07   | 1   | 1256093  | .         | AC       | A       | .    | PASS   | CPSF3L    | intronic   |
| ACa07   | 1   | 1356387  | rs7790390 | T        | TG      | .    | PASS   | ANKRD65   | splicing   |
| ACa07   | 1   | 1391388  | .         | AC       | A       | .    | PASS   | ATAD3C    | intronic   |
| ACa07   | 1   | 12253249 | .         | CG       | C       | .    | PASS   | TNFRSF11  | intronic   |
| ACa07   | 1   | 19467922 | .         | TG       | T       | .    | PASS   | UBR4      | exonic     |
| ACa07   | 1   | 27106800 | .         | CA       | C       | .    | PASS   | ARID1A    | exonic     |
| ACa07   | 1   | 39734616 | .         | A        | AC      | .    | PASS   | MACF1     | intronic   |
| ACa07   | 1   | 39919366 | .         | C        | CT      | .    | PASS   | MACF1     | intronic   |
| ACa07   | 1   | 41990610 | rs7712392 | GA       | G       | .    | PASS   | HIVEP3    | intronic   |
| ACa07   | 1   | 62190602 | rs7686883 | T        | TG      | .    | PASS   | TM2D1     | intronic   |
| ACa07   | 1   | 86361739 | .         | CT       | C       | .    | PASS   | COL24A1   | exonic     |
| ACa07   | 1   | 1.1E+08  | rs7700977 | GT       | G       | .    | PASS   | SARS      | intronic   |
| ACa07   | 1   | 1.13E+08 | .         | AG       | A       | .    | PASS   | RHOC      | intronic   |
| ACa07   | 1   | 1.5E+08  | .         | TG       | T       | .    | PASS   | APH1A     | intronic   |
| ACa07   | 1   | 1.55E+08 | .         | GT       | G       | .    | PASS   | UBE2Q1    | exonic     |
| ACa07   | 1   | 1.55E+08 | .         | TA       | T       | .    | PASS   | CLK2      | exonic     |
| ACa07   | 1   | 1.56E+08 | .         | GA       | G       | .    | PASS   | GON4L     | intronic   |
| ACa07   | 1   | 1.57E+08 | .         | CAG      | C       | .    | PASS   | BCAN      | intronic   |
| ACa07   | 1   | 1.77E+08 | .         | TC       | T       | .    | PASS   | PAPPA2    | intronic   |
| ACa07   | 1   | 1.79E+08 | rs7584166 | G        | GA      | .    | PASS   | AXDND1    | exonic     |
| ACa07   | 1   | 1.83E+08 | rs7537986 | GA       | G       | .    | PASS   | DHX9      | UTR3       |
| ACa07   | 1   | 1.99E+08 | rs5395449 | AT       | A       | .    | PASS   | PTPRC     | intronic   |
| ACa07   | 1   | 2.04E+08 | .         | AC       | A       | .    | PASS   | PLEKHA6   | exonic     |
| ACa07   | 1   | 2.26E+08 | rs7594247 | TA       | T       | .    | PASS   | LIN9      | intronic   |
| ACa07   | 1   | 2.27E+08 | rs7703770 | TA       | T       | .    | PASS   | CDC42BP1  | intronic   |
| ACa07   | 1   | 2.32E+08 | .         | CG       | C       | .    | PASS   | TSNAX-DI  | ncRNA_ex   |
| ACa07   | 2   | 7421609  | rs7968975 | CTG      | C       | .    | PASS   | .         | intergenic |

|       |   |          |           |         |    |   |      |           |            |
|-------|---|----------|-----------|---------|----|---|------|-----------|------------|
| ACa07 | 2 | 11389836 | .         | C       | CA | . | PASS | ROCK2     | exonic     |
| ACa07 | 2 | 24406265 | rs7808912 | AT      | A  | . | PASS | FAM228A   | intronic   |
| ACa07 | 2 | 28464145 | .         | TA      | T  | . | PASS | BRE       | intronic   |
| ACa07 | 2 | 41384161 | rs1997131 | CA      | C  | . | PASS | .         | intergenic |
| ACa07 | 2 | 46841951 | .         | GA      | G  | . | PASS | PIGF      | intronic   |
| ACa07 | 2 | 55464460 | rs7703599 | A       | AT | . | PASS | MTIF2     | exonic     |
| ACa07 | 2 | 74763923 | rs7789371 | G       | GC | . | PASS | LOXL3     | exonic     |
| ACa07 | 2 | 86433450 | .         | G       | GT | . | PASS | MRPL35    | intronic   |
| ACa07 | 2 | 1E+08    | .         | TA      | T  | . | PASS | AFF3      | intronic   |
| ACa07 | 2 | 1.22E+08 | .         | CG      | C  | . | PASS | TFCP2L1   | intronic   |
| ACa07 | 2 | 1.49E+08 | rs7647197 | TA      | T  | . | PASS | ACVR2A    | exonic     |
| ACa07 | 2 | 1.67E+08 | .         | AG      | A  | . | PASS | CSRNP3    | exonic     |
| ACa07 | 2 | 1.67E+08 | .         | A       | AT | . | PASS | LOC10272  | ncRNA_int  |
| ACa07 | 2 | 1.68E+08 | rs7456483 | T       | TG | . | PASS | XIRP2     | exonic     |
| ACa07 | 2 | 1.76E+08 | .         | CT      | C  | . | PASS | ATF2      | exonic     |
| ACa07 | 2 | 1.79E+08 | .         | AT      | A  | . | PASS | PDE11A    | intronic   |
| ACa07 | 2 | 1.79E+08 | rs7470964 | CT      | C  | . | PASS | MIR548N   | ncRNA_int  |
| ACa07 | 2 | 1.79E+08 | .         | AT      | A  | . | PASS | TTN       | exonic     |
| ACa07 | 2 | 1.92E+08 | .         | A       | AT | . | PASS | STAT1     | exonic     |
| ACa07 | 2 | 1.99E+08 | .         | CA      | C  | . | PASS | BOLL      | intronic   |
| ACa07 | 2 | 2.03E+08 | .         | T       | TA | . | PASS | CDK15     | intronic   |
| ACa07 | 2 | 2.07E+08 | .         | AC      | A  | . | PASS | ADAM23    | exonic     |
| ACa07 | 2 | 2.08E+08 | .         | AG      | A  | . | PASS | FASTKD2   | exonic     |
| ACa07 | 2 | 2.08E+08 | .         | GA      | G  | . | PASS | METTL21A  | intronic   |
| ACa07 | 2 | 2.2E+08  | .         | TA      | T  | . | PASS | RESP18    | splicing   |
| ACa07 | 2 | 2.29E+08 | .         | TG      | T  | . | PASS | SPHKAP    | exonic     |
| ACa07 | 2 | 2.35E+08 | rs5440185 | A       | AC | . | PASS | DNAJB3    | exonic     |
| ACa07 | 2 | 2.42E+08 | .         | CT      | C  | . | PASS | FARP2     | intronic   |
| ACa07 | 3 | 1363509  | .         | AT      | A  | . | PASS | CNTN6     | exonic     |
| ACa07 | 3 | 14974794 | rs9042896 | C       | CT | . | PASS | FGD5      | UTR3       |
| ACa07 | 3 | 25820209 | rs7608755 | TA      | T  | . | PASS | NGLY1     | intronic   |
| ACa07 | 3 | 45765061 | .         | GAA     | G  | . | PASS | SACM1L    | intronic   |
| ACa07 | 3 | 47449380 | .         | TGAG    | T  | . | PASS | PTPN23    | exonic     |
| ACa07 | 3 | 50005144 | rs7647092 | A       | AG | . | PASS | RBM6      | exonic     |
| ACa07 | 3 | 51909483 | .         | CA      | C  | . | PASS | IQCF5-AS1 | ncRNA_ex   |
| ACa07 | 3 | 53220652 | .         | CG      | C  | . | PASS | PRKCD     | exonic     |
| ACa07 | 3 | 53810811 | .         | CT      | C  | . | PASS | CACNA1D   | intronic   |
| ACa07 | 3 | 1.13E+08 | .         | AAG     | A  | . | PASS | C3orf17   | intronic   |
| ACa07 | 3 | 1.29E+08 | .         | T       | TG | . | PASS | ACAD9     | intronic   |
| ACa07 | 3 | 1.38E+08 | rs7755820 | GA      | G  | . | PASS | FAIM      | exonic     |
| ACa07 | 3 | 1.49E+08 | .         | T       | TC | . | PASS | ANKUB1    | intronic   |
| ACa07 | 3 | 1.52E+08 | .         | CTTCT   | C  | . | PASS | MBNL1     | intronic   |
| ACa07 | 3 | 1.74E+08 | .         | A       | AT | . | PASS | NLGN1     | intronic   |
| ACa07 | 3 | 1.84E+08 | .         | TG      | T  | . | PASS | CHRD      | intronic   |
| ACa07 | 4 | 1194388  | .         | G       | GC | . | PASS | LOC10013  | ncRNA_int  |
| ACa07 | 4 | 1379730  | rs7704742 | TTAAC   | T  | . | PASS | UVSSA     | exonic     |
| ACa07 | 4 | 8358662  | rs7480610 | GAGA    | G  | . | PASS | .         | intergenic |
| ACa07 | 4 | 37863107 | rs7646973 | AT      | A  | . | PASS | PGM2      | intronic   |
| ACa07 | 4 | 41672908 | rs9281864 | GA      | G  | . | PASS | LIMCH1    | intronic   |
| ACa07 | 4 | 54231548 | .         | AAGG    | A  | . | PASS | SCFD2     | exonic     |
| ACa07 | 4 | 56448411 | rs7525252 | AAAAAAG | A  | . | PASS | PDCL2     | intronic   |
| ACa07 | 4 | 81123328 | .         | TC      | T  | . | PASS | PRDM8     | exonic     |
| ACa07 | 4 | 95192048 | .         | C       | CT | . | PASS | SMARCA1   | intronic   |
| ACa07 | 4 | 1.11E+08 | .         | CG      | C  | . | PASS | EGF       | intronic   |

|       |   |          |           |      |      |   |      |          |            |
|-------|---|----------|-----------|------|------|---|------|----------|------------|
| ACa07 | 4 | 1.14E+08 | .         | C    | CA   | . | PASS | CAMK2D   | intronic   |
| ACa07 | 4 | 1.15E+08 | rs7641185 | C    | CT   | . | PASS | ARSJ     | exonic     |
| ACa07 | 4 | 1.26E+08 | rs7639462 | TCTC | T    | . | PASS | FAT4     | exonic     |
| ACa07 | 4 | 1.78E+08 | .         | A    | AT   | . | PASS | NEIL3    | exonic     |
| ACa07 | 4 | 1.91E+08 | .         | C    | CA   | . | PASS | FRG2     | intronic   |
| ACa07 | 5 | 1576160  | .         | AG   | A    | . | PASS | SDHAP3   | ncRNA_int  |
| ACa07 | 5 | 14487780 | rs7466549 | AC   | A    | . | PASS | TRIO     | exonic     |
| ACa07 | 5 | 14711208 | rs7717298 | C    | CA   | . | PASS | ANKH     | UTR3       |
| ACa07 | 5 | 33683110 | .         | GA   | G    | . | PASS | ADAMTS1  | intronic   |
| ACa07 | 5 | 37239071 | .         | GA   | G    | . | PASS | C5orf42  | intronic   |
| ACa07 | 5 | 38903970 | rs7625018 | CT   | C    | . | PASS | OSMR     | intronic   |
| ACa07 | 5 | 74054640 | rs7658478 | T    | TG   | . | PASS | GFM2     | intronic   |
| ACa07 | 5 | 77425138 | .         | G    | GA   | . | PASS | AP3B1    | intronic   |
| ACa07 | 5 | 1.4E+08  | .         | ACT  | A    | . | PASS | SRA1     | intronic   |
| ACa07 | 5 | 1.41E+08 | rs7778584 | GT   | G    | . | PASS | PCDHGA3  | exonic     |
| ACa07 | 5 | 1.54E+08 | rs7693384 | G    | GC   | . | PASS | LARP1    | exonic     |
| ACa07 | 5 | 1.68E+08 | .         | AG   | A    | . | PASS | SLIT3    | exonic     |
| ACa07 | 5 | 1.68E+08 | rs7768326 | CG   | C    | . | PASS | SLIT3    | intronic   |
| ACa07 | 6 | 28494004 | rs3743843 | CT   | C    | . | PASS | GPX5     | intronic   |
| ACa07 | 6 | 31473742 | .         | TG   | T    | . | PASS | MICB     | intronic   |
| ACa07 | 6 | 31931561 | rs7666007 | CT   | C    | . | PASS | SKIV2L   | intronic   |
| ACa07 | 6 | 32149321 | rs7805014 | TC   | T    | . | PASS | AGER     | exonic     |
| ACa07 | 6 | 32156482 | rs7489955 | CG   | C    | . | PASS | PBX2     | intronic   |
| ACa07 | 6 | 32905244 | rs7612855 | G    | GA   | . | PASS | HLA-DMB  | intronic   |
| ACa07 | 6 | 36867370 | rs7600208 | AC   | A    | . | PASS | C6orf89  | exonic     |
| ACa07 | 6 | 41555084 | .         | GC   | G    | . | PASS | FOXP4    | exonic     |
| ACa07 | 6 | 76028720 | .         | GA   | G    | . | PASS | FILIP1   | intronic   |
| ACa07 | 6 | 99848190 | .         | GA   | G    | . | PASS | PNISR    | UTR3       |
| ACa07 | 6 | 1.01E+08 | rs7792033 | C    | CA   | . | PASS | SIM1     | intronic   |
| ACa07 | 6 | 1.03E+08 | rs7668254 | CA   | C    | . | PASS | GRIK2    | exonic     |
| ACa07 | 6 | 1.07E+08 | .         | TC   | T    | . | PASS | BEND3    | exonic     |
| ACa07 | 6 | 1.11E+08 | .         | A    | AG   | . | PASS | SLC16A10 | intronic   |
| ACa07 | 6 | 1.12E+08 | .         | G    | GT   | . | PASS | TRAF3IP2 | exonic     |
| ACa07 | 6 | 1.12E+08 | rs1490463 | ATG  | A    | . | PASS | LAMA4    | intronic   |
| ACa07 | 6 | 1.22E+08 | .         | AT   | A    | . | PASS | TBC1D32  | exonic     |
| ACa07 | 6 | 1.35E+08 | rs7570813 | CT   | C    | . | PASS | HBS1L    | exonic     |
| ACa07 | 6 | 1.44E+08 | rs7468588 | C    | CA   | . | PASS | PHACTR2  | exonic     |
| ACa07 | 6 | 1.6E+08  | .         | TAG  | T    | . | PASS | PNLDC1   | intronic   |
| ACa07 | 6 | 1.6E+08  | .         | A    | AT   | . | PASS | IGF2R    | intronic   |
| ACa07 | 7 | 35473    | .         | T    | TGCC | . | PASS | .        | intergenic |
| ACa07 | 7 | 1703082  | rs1443745 | T    | TG   | . | PASS | .        | intergenic |
| ACa07 | 7 | 4874484  | .         | TC   | T    | . | PASS | RADIL    | exonic     |
| ACa07 | 7 | 5401258  | rs7542333 | C    | CG   | . | PASS | TNRC18   | exonic     |
| ACa07 | 7 | 15666546 | rs3701666 | GA   | G    | . | PASS | MEOX2    | splicing   |
| ACa07 | 7 | 27498345 | .         | A    | AG   | . | PASS | .        | intergenic |
| ACa07 | 7 | 30472801 | rs7470634 | GA   | G    | . | PASS | NOD1     | intronic   |
| ACa07 | 7 | 30491509 | .         | AC   | A    | . | PASS | NOD1     | exonic     |
| ACa07 | 7 | 55433871 | .         | T    | TC   | . | PASS | LANCL2   | exonic     |
| ACa07 | 7 | 57528541 | rs7819467 | TA   | T    | . | PASS | ZNF716   | exonic     |
| ACa07 | 7 | 72952223 | .         | C    | CA   | . | PASS | BCL7B    | intronic   |
| ACa07 | 7 | 73480937 | .         | TG   | T    | . | PASS | ELN      | intronic   |
| ACa07 | 7 | 99672965 | .         | GA   | G    | . | PASS | ZNF3     | intronic   |
| ACa07 | 7 | 1E+08    | .         | TG   | T    | . | PASS | NYAP1    | exonic     |
| ACa07 | 7 | 1E+08    | rs5592025 | CG   | C    | . | PASS | EPHB4    | intronic   |

|       |    |          |           |          |      |      |      |           |            |
|-------|----|----------|-----------|----------|------|------|------|-----------|------------|
| ACa07 | 7  | 1.02E+08 | .         | GCCAGCCG | .    | PASS | CUX1 | exonic    |            |
| ACa07 | 7  | 1.23E+08 | rs7594121 | A        | AGAG | .    | PASS | LMOD2     | exonic     |
| ACa07 | 7  | 1.34E+08 | rs7708715 | TA       | T    | .    | PASS | AKR1B10   | intronic   |
| ACa07 | 7  | 1.51E+08 | .         | G        | GC   | .    | PASS | ATG9B     | exonic     |
| ACa07 | 7  | 1.55E+08 | rs7618495 | CT       | C    | .    | PASS | DPP6      | intronic   |
| ACa07 | 8  | 15977886 | .         | A        | AAAC | .    | PASS | MSR1      | intronic   |
| ACa07 | 8  | 18656880 | rs7790763 | GA       | G    | .    | PASS | PSD3      | intronic   |
| ACa07 | 8  | 22017278 | .         | G        | GC   | .    | PASS | .         | intergenic |
| ACa07 | 8  | 23340737 | rs1126292 | CG       | C    | .    | PASS | .         | intergenic |
| ACa07 | 8  | 32607049 | rs3832550 | C        | CT   | .    | PASS | NRG1      | intronic   |
| ACa07 | 8  | 38458195 | .         | CA       | C    | .    | PASS | RNF5P1    | ncRNA_ex   |
| ACa07 | 8  | 56866371 | .         | AT       | A    | .    | PASS | LYN       | intronic   |
| ACa07 | 8  | 80678509 | rs7782900 | CT       | C    | .    | PASS | HEY1      | UTR5       |
| ACa07 | 8  | 95686610 | rs7759500 | TA       | T    | .    | PASS | ESRP1     | exonic     |
| ACa07 | 8  | 1.05E+08 | .         | CT       | C    | .    | PASS | RIMS2     | intronic   |
| ACa07 | 8  | 1.33E+08 | rs1462533 | TAC      | T    | .    | PASS | KCNQ3     | intronic   |
| ACa07 | 8  | 1.44E+08 | .         | T        | TC   | .    | PASS | BAI1      | intronic   |
| ACa07 | 8  | 1.45E+08 | rs7562540 | A        | AC   | .    | PASS | CYC1      | exonic     |
| ACa07 | 9  | 27359243 | rs7648900 | GA       | G    | .    | PASS | MOB3B     | intronic   |
| ACa07 | 9  | 34997368 | rs7766165 | CA       | C    | .    | PASS | DNAJB5    | UTR3       |
| ACa07 | 9  | 35707140 | .         | CG       | C    | .    | PASS | TLN1      | exonic     |
| ACa07 | 9  | 44078574 | rs5303481 | AT       | A    | .    | PASS | .         | intergenic |
| ACa07 | 9  | 96438893 | .         | G        | GA   | .    | PASS | PHF2      | exonic     |
| ACa07 | 9  | 98209616 | .         | TG       | T    | .    | PASS | PTCH1     | exonic     |
| ACa07 | 9  | 98278828 | .         | CT       | C    | .    | PASS | PTCH1     | UTR5       |
| ACa07 | 9  | 1.14E+08 | rs7606317 | C        | CA   | .    | PASS | KIAA0368  | intronic   |
| ACa07 | 9  | 1.25E+08 | rs7792498 | AT       | A    | .    | PASS | OR1L3     | exonic     |
| ACa07 | 9  | 1.26E+08 | rs1028985 | CCTT     | C    | .    | PASS | STRBP     | exonic     |
| ACa07 | 9  | 1.28E+08 | rs7703285 | CT       | C    | .    | PASS | RABEPK    | intronic   |
| ACa07 | 9  | 1.32E+08 | rs3675892 | AC       | A    | .    | PASS | C9orf50,N | intronic   |
| ACa07 | 9  | 1.34E+08 | .         | TG       | T    | .    | PASS | PPAPDC3   | intronic   |
| ACa07 | 9  | 1.39E+08 | .         | TG       | T    | .    | PASS | PMPCA     | exonic     |
| ACa07 | 9  | 1.4E+08  | .         | G        | GC   | .    | PASS | LCN8      | intronic   |
| ACa07 | 9  | 1.4E+08  | rs7517698 | A        | AC   | .    | PASS | CCDC183   | intronic   |
| ACa07 | 9  | 1.4E+08  | .         | AC       | A    | .    | PASS | C9orf142  | exonic     |
| ACa07 | 10 | 7269835  | .         | A        | AG   | .    | PASS | SFMBT2    | exonic     |
| ACa07 | 10 | 26534837 | rs7625775 | AT       | A    | .    | PASS | GAD2      | intronic   |
| ACa07 | 10 | 29169287 | .         | CA       | C    | .    | PASS | C10orf126 | exonic     |
| ACa07 | 10 | 47381004 | .         | TA       | T    | .    | PASS | FAM35DP   | ncRNA_ex   |
| ACa07 | 10 | 64977094 | rs7582351 | T        | TA   | .    | PASS | JMJD1C    | splicing   |
| ACa07 | 10 | 70731843 | .         | G        | GT   | .    | PASS | DDX21     | intronic   |
| ACa07 | 10 | 72520489 | rs7542104 | C        | CG   | .    | PASS | ADAMTS1   | exonic     |
| ACa07 | 10 | 75560463 | rs7696631 | T        | TC   | .    | PASS | ZSWIM8    | exonic     |
| ACa07 | 10 | 81072274 | .         | CT       | C    | .    | PASS | ZMIZ1     | intronic   |
| ACa07 | 10 | 81927077 | rs7488695 | GACAA    | G    | .    | PASS | ANXA11    | intronic   |
| ACa07 | 10 | 88768816 | rs7664186 | GGAA     | G    | .    | PASS | AGAP11    | exonic     |
| ACa07 | 10 | 95400667 | rs7585686 | AT       | A    | .    | PASS | PDE6C     | intronic   |
| ACa07 | 10 | 1.05E+08 | .         | CA       | C    | .    | PASS | INA       | intronic   |
| ACa07 | 10 | 1.24E+08 | rs5534658 | G        | GC   | .    | PASS | TACC2     | intronic   |
| ACa07 | 10 | 1.34E+08 | .         | GT       | G    | .    | PASS | BNIP3     | intronic   |
| ACa07 | 11 | 320191   | .         | T        | TG   | .    | PASS | IFITM3    | intronic   |
| ACa07 | 11 | 375699   | .         | TG       | T    | .    | PASS | B4GALNT4  | exonic     |
| ACa07 | 11 | 1478186  | rs7518721 | AC       | A    | .    | PASS | BRSK2     | exonic     |
| ACa07 | 11 | 4712970  | rs9766384 | CA       | C    | .    | PASS | OR51E2    | intronic   |

|       |    |          |           |       |     |   |      |          |            |
|-------|----|----------|-----------|-------|-----|---|------|----------|------------|
| ACa07 | 11 | 7110948  | .         | GC    | G   | . | PASS | RBMXL2   | exonic     |
| ACa07 | 11 | 8716961  | .         | CCCTT | C   | . | PASS | ST5      | intronic   |
| ACa07 | 11 | 20409548 | rs7632273 | T     | TTG | . | PASS | PRMT3    | intronic   |
| ACa07 | 11 | 26584821 | rs7778008 | C     | CA  | . | PASS | MUC15,AN | intronic   |
| ACa07 | 11 | 43740330 | rs1049395 | CA    | C   | . | PASS | HSD17B12 | intronic   |
| ACa07 | 11 | 45907401 | .         | AG    | A   | . | PASS | MAPK8IP1 | exonic     |
| ACa07 | 11 | 62378941 | .         | AG    | A   | . | PASS | EML3     | exonic     |
| ACa07 | 11 | 66433146 | .         | GA    | G   | . | PASS | RBM4B,RE | intronic   |
| ACa07 | 11 | 67049843 | rs7588677 | GC    | G   | . | PASS | ADRBK1   | intronic   |
| ACa07 | 11 | 71238177 | rs8987047 | GA    | G   | . | PASS | .        | upstream   |
| ACa07 | 11 | 77920855 | rs7647351 | AC    | A   | . | PASS | USP35    | exonic     |
| ACa07 | 11 | 83344240 | .         | AC    | A   | . | PASS | DLG2     | intronic   |
| ACa07 | 11 | 92531965 | .         | AT    | A   | . | PASS | FAT3     | exonic     |
| ACa07 | 11 | 93439895 | rs5739889 | AT    | A   | . | PASS | CEP295   | intronic   |
| ACa07 | 11 | 1.34E+08 | rs7766671 | AAAGT | A   | . | PASS | JAM3     | exonic     |
| ACa07 | 12 | 416952   | rs7749641 | CT    | C   | . | PASS | KDM5A    | exonic     |
| ACa07 | 12 | 4877574  | rs7666743 | C     | CT  | . | PASS | GALNT8   | intronic   |
| ACa07 | 12 | 6765122  | .         | CT    | C   | . | PASS | ING4     | intronic   |
| ACa07 | 12 | 7064305  | .         | TC    | T   | . | PASS | PTPN6    | intronic   |
| ACa07 | 12 | 7967145  | .         | GA    | G   | . | PASS | SLC2A14  | intronic   |
| ACa07 | 12 | 9885640  | .         | A     | AAG | . | PASS | CLECL1   | exonic     |
| ACa07 | 12 | 12510357 | rs7566997 | GTTC  | G   | . | PASS | LOH12CR  | UTR5       |
| ACa07 | 12 | 27786283 | rs7649880 | AT    | A   | . | PASS | PPFIBP1  | intronic   |
| ACa07 | 12 | 27803090 | .         | TCTC  | T   | . | PASS | PPFIBP1  | intronic   |
| ACa07 | 12 | 40878124 | .         | TG    | T   | . | PASS | MUC19    | exonic     |
| ACa07 | 12 | 46385784 | .         | T     | TC  | . | PASS | .        | intergenic |
| ACa07 | 12 | 49433406 | rs7636694 | CA    | C   | . | PASS | KMT2D    | intronic   |
| ACa07 | 12 | 50475320 | .         | TC    | T   | . | PASS | ASIC1    | intronic   |
| ACa07 | 12 | 51402108 | .         | GTA   | G   | . | PASS | SLC11A2  | intronic   |
| ACa07 | 12 | 52200420 | .         | GC    | G   | . | PASS | SCN8A    | exonic     |
| ACa07 | 12 | 53400448 | .         | TG    | T   | . | PASS | EIF4B    | intronic   |
| ACa07 | 12 | 54426885 | rs5532896 | AT    | A   | . | PASS | HOXC5    | UTR5       |
| ACa07 | 12 | 56827355 | .         | CA    | C   | . | PASS | TIMELESS | exonic     |
| ACa07 | 12 | 57422572 | rs7706124 | CT    | C   | . | PASS | MYO1A    | exonic     |
| ACa07 | 12 | 57522679 | rs5359317 | T     | TG  | . | PASS | LRP1     | UTR5       |
| ACa07 | 12 | 57921731 | rs7763171 | TG    | T   | . | PASS | MBD6     | exonic     |
| ACa07 | 12 | 1.04E+08 | rs1999629 | GT    | G   | . | PASS | HCFC2    | intronic   |
| ACa07 | 12 | 1.05E+08 | .         | TAAAG | T   | . | PASS | NFYB     | intronic   |
| ACa07 | 12 | 1.24E+08 | .         | C     | CT  | . | PASS | DNAH10   | exonic     |
| ACa07 | 13 | 27255386 | rs7643750 | GC    | G   | . | PASS | WASF3    | exonic     |
| ACa07 | 13 | 36855327 | .         | A     | AG  | . | PASS | CCDC169, | intronic   |
| ACa07 | 13 | 1.11E+08 | rs7166969 | TG    | T   | . | PASS | CARS2    | intronic   |
| ACa07 | 14 | 55236839 | .         | G     | GA  | . | PASS | SAMD4A   | exonic     |
| ACa07 | 14 | 58934608 | .         | GA    | G   | . | PASS | KIAA0586 | exonic     |
| ACa07 | 14 | 59781977 | rs1134746 | CT    | C   | . | PASS | DAAM1    | intronic   |
| ACa07 | 14 | 69354434 | rs5526989 | TA    | T   | . | PASS | ACTN1    | intronic   |
| ACa07 | 14 | 94120292 | .         | CT    | C   | . | PASS | UNC79    | exonic     |
| ACa07 | 14 | 96798757 | .         | AT    | A   | . | PASS | ATG2B    | intronic   |
| ACa07 | 14 | 1.06E+08 | .         | AC    | A   | . | PASS | CRIP1    | intronic   |
| ACa07 | 15 | 23021238 | rs1451472 | CT    | C   | . | PASS | NIPA2    | exonic     |
| ACa07 | 15 | 42930851 | .         | CT    | C   | . | PASS | STARD9   | intronic   |
| ACa07 | 15 | 43705010 | rs7643803 | CA    | C   | . | PASS | RNU6-28P | ncRNA_int  |
| ACa07 | 15 | 43748660 | .         | CT    | C   | . | PASS | TP53BP1  | exonic     |
| ACa07 | 15 | 49574201 | .         | CTG   | C   | . | PASS | GALK2    | exonic     |

|       |    |          |           |          |      |   |      |          |            |
|-------|----|----------|-----------|----------|------|---|------|----------|------------|
| ACa07 | 15 | 54003202 | rs5635626 | GT       | G    | . | PASS | WDR72    | intronic   |
| ACa07 | 15 | 72072854 | rs7515595 | T        | TA   | . | PASS | THSD4    | UTR3       |
| ACa07 | 15 | 73558645 | rs5561116 | C        | CT   | . | PASS | NEO1     | intronic   |
| ACa07 | 15 | 73995992 | .         | GC       | G    | . | PASS | CD276    | intronic   |
| ACa07 | 15 | 85405928 | .         | TG       | T    | . | PASS | ALPK3    | exonic     |
| ACa07 | 15 | 86807692 | rs7643461 | CA       | C    | . | PASS | AGBL1    | exonic     |
| ACa07 | 15 | 88472356 | .         | GA       | G    | . | PASS | NTRK3    | intronic   |
| ACa07 | 15 | 90190139 | .         | AC       | A    | . | PASS | KIF7     | exonic     |
| ACa07 | 15 | 91434151 | .         | GC       | G    | . | PASS | FES      | intronic   |
| ACa07 | 16 | 3599228  | rs7781350 | G        | GA   | . | PASS | NLRC3    | splicing   |
| ACa07 | 16 | 4387550  | rs7809656 | GC       | G    | . | PASS | GLIS2    | UTR3       |
| ACa07 | 16 | 4862228  | rs7491504 | G        | GC   | . | PASS | GLYR1    | exonic     |
| ACa07 | 16 | 12536764 | .         | CT       | C    | . | PASS | SNX29    | intronic   |
| ACa07 | 16 | 15122677 | .         | G        | GT   | . | PASS | PDXDC1   | intronic   |
| ACa07 | 16 | 30392609 | .         | AC       | A    | . | PASS | SEPT1,ZN | intronic   |
| ACa07 | 16 | 30983080 | rs7570296 | T        | TGA  | . | PASS | SETD1A   | intronic   |
| ACa07 | 16 | 50340876 | .         | GT       | G    | . | PASS | ADCY7    | intronic   |
| ACa07 | 16 | 66436882 | rs7817135 | G        | GC   | . | PASS | CDH5     | exonic     |
| ACa07 | 16 | 67325657 | rs7679025 | CG       | C    | . | PASS | KCTD19   | exonic     |
| ACa07 | 16 | 68321838 | .         | ACT      | A    | . | PASS | SLC7A6   | intronic   |
| ACa07 | 16 | 88494628 | .         | T        | TC   | . | PASS | ZNF469   | exonic     |
| ACa07 | 17 | 663583   | .         | TA       | T    | . | PASS | GLOD4    | intronic   |
| ACa07 | 17 | 2597572  | .         | TG       | T    | . | PASS | CLUH     | splicing   |
| ACa07 | 17 | 7297382  | .         | TG       | T    | . | PASS | TMEM256  | ncRNA_int  |
| ACa07 | 17 | 7832616  | rs7574964 | AC       | A    | . | PASS | KCNAB3   | exonic     |
| ACa07 | 17 | 8380302  | .         | GCTT     | G    | . | PASS | MYH10    | exonic     |
| ACa07 | 17 | 29687463 | rs5285990 | TA       | T    | . | PASS | NF1      | intronic   |
| ACa07 | 17 | 37318860 | .         | ATC      | A    | . | PASS | ARL5C    | intronic   |
| ACa07 | 17 | 37687471 | .         | TG       | T    | . | PASS | CDK12    | exonic     |
| ACa07 | 17 | 40458083 | .         | GA       | G    | . | PASS | STAT5A   | intronic   |
| ACa07 | 17 | 41004673 | .         | TC       | T    | . | PASS | AOC3     | exonic     |
| ACa07 | 17 | 42477138 | .         | CT       | C    | . | PASS | GPATCH8  | exonic     |
| ACa07 | 17 | 43322182 | .         | CCA      | C    | . | PASS | FMNL1    | splicing   |
| ACa07 | 17 | 45291237 | rs1380173 | T        | TGGA | . | PASS | MYL4     | intronic   |
| ACa07 | 17 | 45915469 | .         | AC       | A    | . | PASS | SCRN2    | UTR3       |
| ACa07 | 17 | 46878603 | .         | CG       | C    | . | PASS | TTLL6    | intronic   |
| ACa07 | 17 | 76794615 | .         | AT       | A    | . | PASS | USP36    | exonic     |
| ACa07 | 17 | 77081973 | rs7634794 | GC       | G    | . | PASS | ENGASE   | intronic   |
| ACa07 | 17 | 78942662 | .         | ATGGAATA | A    | . | PASS | .        | intergenic |
| ACa07 | 17 | 80012761 | rs7487058 | GC       | G    | . | PASS | GPS1     | intronic   |
| ACa07 | 18 | 2724882  | rs1429731 | AT       | A    | . | PASS | SMCHD1   | intronic   |
| ACa07 | 18 | 12274075 | rs7500268 | TC       | T    | . | PASS | CIDEA    | intronic   |
| ACa07 | 18 | 13643281 | .         | GT       | G    | . | PASS | LDLRAD4  | intronic   |
| ACa07 | 18 | 21140211 | .         | C        | CA   | . | PASS | NPC1     | exonic     |
| ACa07 | 18 | 23845110 | rs7661354 | CT       | C    | . | PASS | TAF4B    | intronic   |
| ACa07 | 18 | 33553014 | .         | GA       | G    | . | PASS | C18orf21 | intronic   |
| ACa07 | 18 | 44101049 | rs5710814 | G        | GC   | . | PASS | LOXHD1   | intronic   |
| ACa07 | 18 | 46476715 | rs1019291 | CCCT     | C    | . | PASS | SMAD7    | exonic     |
| ACa07 | 18 | 56246441 | rs7630535 | T        | TC   | . | PASS | ALPK2    | exonic     |
| ACa07 | 19 | 1128144  | .         | GA       | G    | . | PASS | SBNO2    | intronic   |
| ACa07 | 19 | 1434835  | .         | GC       | G    | . | PASS | DAZAP1   | exonic     |
| ACa07 | 19 | 3831692  | rs7644591 | CG       | C    | . | PASS | ZFR2     | exonic     |
| ACa07 | 19 | 3941222  | .         | G        | GC   | . | PASS | NMRK2    | intronic   |
| ACa07 | 19 | 4697751  | .         | TC       | T    | . | PASS | DPP9     | intronic   |

|       |    |          |           |      |    |   |      |          |            |
|-------|----|----------|-----------|------|----|---|------|----------|------------|
| ACa07 | 19 | 4909388  | .         | GC   | G  | . | PASS | .        | intronic   |
| ACa07 | 19 | 5218843  | rs7590798 | GA   | G  | . | PASS | PTPRS    | intronic   |
| ACa07 | 19 | 5240270  | .         | CG   | C  | . | PASS | PTPRS    | exonic     |
| ACa07 | 19 | 6387617  | rs7708014 | GC   | G  | . | PASS | GTF2F1   | intronic   |
| ACa07 | 19 | 6719395  | .         | TG   | T  | . | PASS | C3       | exonic     |
| ACa07 | 19 | 8601567  | .         | TG   | T  | . | PASS | MYO1F    | intronic   |
| ACa07 | 19 | 13081255 | .         | GT   | G  | . | PASS | DAND5    | intronic   |
| ACa07 | 19 | 17941276 | .         | GAGA | G  | . | PASS | JAK3     | intronic   |
| ACa07 | 19 | 18887992 | rs7799007 | TC   | T  | . | PASS | CRTC1    | exonic     |
| ACa07 | 19 | 33638508 | rs7677659 | C    | CA | . | PASS | WDR88    | intronic   |
| ACa07 | 19 | 34941384 | .         | CA   | C  | . | PASS | UBA2     | intronic   |
| ACa07 | 19 | 35843419 | .         | CG   | C  | . | PASS | .        | downstream |
| ACa07 | 19 | 36211898 | .         | AC   | A  | . | PASS | KMT2B    | exonic     |
| ACa07 | 19 | 37118180 | rs9414440 | GA   | G  | . | PASS | ZNF382   | exonic     |
| ACa07 | 19 | 38023216 | .         | A    | AT | . | PASS | ZNF793   | intronic   |
| ACa07 | 19 | 38573182 | .         | GC   | G  | . | PASS | SIPA1L3  | exonic     |
| ACa07 | 19 | 43808555 | .         | T    | TC | . | PASS | .        | intergenic |
| ACa07 | 19 | 43991218 | rs7662018 | TC   | T  | . | PASS | PHLDB3   | exonic     |
| ACa07 | 19 | 45655750 | .         | TG   | T  | . | PASS | NKPD1    | exonic     |
| ACa07 | 19 | 45803093 | .         | CG   | C  | . | PASS | MARK4    | exonic     |
| ACa07 | 19 | 46124694 | rs7520653 | C    | CG | . | PASS | EML2     | intronic   |
| ACa07 | 19 | 46190720 | .         | GA   | G  | . | PASS | SNRPD2   | UTR3       |
| ACa07 | 19 | 46998234 | .         | AC   | A  | . | PASS | PNMAL2   | exonic     |
| ACa07 | 19 | 48197890 | rs7555061 | A    | AC | . | PASS | GLTSCR1  | exonic     |
| ACa07 | 19 | 49458970 | rs3981228 | T    | TG | . | PASS | BAX      | exonic     |
| ACa07 | 19 | 50139128 | .         | CG   | C  | . | PASS | RRAS     | intronic   |
| ACa07 | 19 | 50862108 | .         | TC   | T  | . | PASS | NAPSA    | intronic   |
| ACa07 | 19 | 51955893 | rs7666986 | CAG  | C  | . | PASS | SIGLEC8  | intronic   |
| ACa07 | 19 | 54754576 | .         | T    | TG | . | PASS | LILRB5   | UTR3       |
| ACa07 | 19 | 54947243 | .         | TC   | T  | . | PASS | TTYH1    | intronic   |
| ACa07 | 19 | 55815035 | rs7811378 | A    | AC | . | PASS | BRSK1    | exonic     |
| ACa07 | 19 | 59069508 | .         | AC   | A  | . | PASS | UBE2M    | intronic   |
| ACa07 | 20 | 2730208  | .         | GC   | G  | . | PASS | EBF4     | intronic   |
| ACa07 | 20 | 3944693  | rs7575646 | GA   | G  | . | PASS | RNF24    | intronic   |
| ACa07 | 20 | 13698200 | rs3605176 | CT   | C  | . | PASS | ESF1     | intronic   |
| ACa07 | 20 | 17596265 | .         | GC   | G  | . | PASS | RRBP1    | intronic   |
| ACa07 | 20 | 31022441 | rs1085307 | A    | AG | . | PASS | ASXL1    | exonic     |
| ACa07 | 20 | 33501331 | rs7539299 | C    | CG | . | PASS | ACSS2    | intronic   |
| ACa07 | 20 | 35155634 | .         | CA   | C  | . | PASS | DLGAP4-A | ncRNA_int  |
| ACa07 | 20 | 35284816 | rs7511829 | TG   | T  | . | PASS | NDRG3    | splicing   |
| ACa07 | 20 | 45644793 | rs7684989 | C    | CT | . | PASS | EYA2     | intronic   |
| ACa07 | 20 | 47858503 | rs7667143 | CA   | C  | . | PASS | DDX27    | exonic     |
| ACa07 | 20 | 62070158 | rs9359712 | AC   | A  | . | PASS | KCNQ2    | intronic   |
| ACa07 | 20 | 62193605 | .         | GC   | G  | . | PASS | HELZ2    | intronic   |
| ACa07 | 21 | 21112410 | rs3687317 | AG   | A  | . | PASS | .        | intergenic |
| ACa07 | 21 | 47571590 | rs7538174 | GC   | G  | . | PASS | FTCD     | exonic     |
| ACa07 | 21 | 47663396 | rs7755389 | C    | CG | . | PASS | MCM3AP   | exonic     |
| ACa07 | 22 | 20137447 | rs2001464 | TC   | T  | . | PASS | .        | upstream   |
| ACa07 | 22 | 25853204 | .         | TC   | T  | . | PASS | CRYBB2P  | ncRNA_int  |
| ACa07 | 22 | 28195488 | .         | AG   | A  | . | PASS | MN1      | exonic     |
| ACa07 | 22 | 31927025 | .         | CT   | C  | . | PASS | SFI1     | intronic   |
| ACa07 | 22 | 37769103 | rs7686708 | AG   | A  | . | PASS | ELFN2    | UTR3       |
| ACa07 | 22 | 37964382 | .         | AC   | A  | . | PASS | CDC42EP  | exonic     |
| ACa07 | 22 | 42905256 | .         | GC   | G  | . | PASS | SERHL    | ncRNA_int  |

|       |    |          |           |          |         |   |      |          |            |
|-------|----|----------|-----------|----------|---------|---|------|----------|------------|
| ACa07 | 22 | 46712113 | rs7743082 | A        | AC      | . | PASS | GTSE1    | exonic     |
| ACa07 | 22 | 50636198 | .         | AC       | A       | . | PASS | TRABD    | intronic   |
| ACa07 | X  | 302051   | .         | GT       | G       | . | PASS | PPP2R3B  | exonic     |
| ACa07 | X  | 7243363  | rs7631509 | CT       | C       | . | PASS | STS      | intronic   |
| ACa07 | X  | 20134812 | .         | G        | GC      | . | PASS | MAP7D2   | intronic   |
| ACa07 | X  | 41203475 | rs7752182 | A        | AT      | . | PASS | DDX3X    | intronic   |
| ACa07 | X  | 47500595 | rs7515575 | AG       | A       | . | PASS | ELK1     | intronic   |
| ACa07 | X  | 48763589 | rs7821251 | A        | AC      | . | PASS | SLC35A2  | intronic   |
| ACa07 | X  | 49055509 | .         | T        | TG      | . | PASS | SYP-AS1  | ncRNA_ex   |
| ACa07 | X  | 49961701 | .         | G        | GC      | . | PASS | AKAP4    | intronic   |
| ACa07 | X  | 75004753 | .         | TG       | T       | . | PASS | MAGEE2   | exonic     |
| ACa07 | X  | 1.35E+08 | rs1064795 | CG       | C       | . | PASS | SLC9A6   | UTR5       |
| ACa07 | X  | 1.53E+08 | rs7823430 | A        | AG      | . | PASS | PLXNB3   | exonic     |
| ACaP0 | 6  | 1611718  | .         | CCCG     | C       | . | PASS | FOXC1    | exonic     |
| ACaP0 | 11 | 75279877 | .         | A        | AGGTGCT | . | PASS | SERPINH1 | splicing   |
| ACaP0 | 19 | 1128220  | .         | C        | CCTGAAG | . | PASS | SBNO2    | intronic   |
| ACaP0 | 1  | 43916716 | .         | CCATCTT  | C       | . | PASS | HYI,SZT2 | UTR3       |
| ACaP0 | 2  | 1.6E+08  | rs7485648 | AGCACTG  | A       | . | PASS | DAPL1    | UTR5       |
| ACaP0 | 3  | 19554555 | .         | GTCTCCC  | G       | . | PASS | KCNH8    | exonic     |
| ACaP0 | 13 | 47263423 | .         | CATTTGT  | C       | . | PASS | LRCH1    | intronic   |
| ACaP0 | 14 | 70040199 | rs9344233 | GGAGGC   | G       | . | PASS | CCDC177  | exonic     |
| ACaP0 | 15 | 23690415 | rs4036589 | T        | TTGTGC  | . | PASS | .        | intergenic |
| ACaP0 | 1  | 54691919 | rs1062553 | G        | GGAA    | . | PASS | SSBP3    | UTR3       |
| ACaP0 | 2  | 1.19E+08 | .         | A        | AGGAGG  | . | PASS | INSIG2   | intronic   |
| ACaP0 | 2  | 1.19E+08 | rs3707030 | AGGAGG   | A       | . | PASS | INSIG2   | intronic   |
| ACaP0 | 6  | 90121644 | .         | ATCCTCC  | A       | . | PASS | RRAGD    | exonic     |
| ACaP0 | 9  | 1.28E+08 | .         | T        | TTCACGG | . | PASS | WDR38    | intronic   |
| ACaP0 | 17 | 78450008 | .         | CGGATGC  | C       | . | PASS | NPTX1    | exonic     |
| ACaP0 | 18 | 33877739 | .         | GCGTCCC  | G       | . | PASS | FHOD3    | UTR5       |
| ACaP0 | 2  | 1.74E+08 | .         | ACTCAAT  | A       | . | PASS | ZAK      | exonic     |
| ACaP0 | 4  | 25162105 | rs8860593 | AAAAAC   | A       | . | PASS | SEPSECS  | UTR5       |
| ACaP0 | 7  | 6226691  | .         | TCCATGT  | T       | . | PASS | CYTH3    | exonic     |
| ACaP0 | 11 | 87011    | .         | AGGTGTCA | .       | . | PASS | .        | intergenic |
| ACaP0 | 14 | 21993501 | rs9488701 | ACTCCT   | A       | . | PASS | SALL2    | exonic     |
| ACaP0 | 17 | 7811126  | rs1047246 | CCAGTA   | C       | . | PASS | CHD3     | intronic   |
| ACaP0 | 1  | 1.48E+08 | .         | AGAGTT   | A       | . | PASS | NBPF14,N | exonic     |
| ACaP0 | 2  | 1.73E+08 | .         | CCGGGA   | C       | . | PASS | PDK1     | intronic   |
| ACaP0 | 6  | 1.58E+08 | .         | GCCAAGC  | G       | . | PASS | SYNJ2    | exonic     |
| ACaP0 | 12 | 1.33E+08 | .         | GA       | G       | . | PASS | POLE     | exonic     |
| ACaP0 | 17 | 7578525  | .         | G        | GCAA    | . | PASS | TP53     | exonic     |
| ACaP0 | 19 | 49691954 | .         | A        | ACGC    | . | PASS | TRPM4    | exonic     |
| ACaP0 | 19 | 51172433 | .         | TGGGGA   | CT      | . | PASS | SHANK1   | exonic     |
| ACaP0 | 22 | 36960223 | rs3980370 | G        | GT      | . | PASS | CACNG2   | UTR3       |
| ACaP0 | 3  | 1.85E+08 | .         | AAGTTGCA | .       | . | PASS | IGF2BP2  | intronic   |
| ACaP0 | 4  | 71554619 | rs7562167 | CGAGGA   | C       | . | PASS | UTP3     | exonic     |
| ACaP0 | 10 | 21805804 | rs7459278 | GGCCGC   | G       | . | PASS | SKIDA1   | exonic     |
| ACaP0 | 16 | 845968   | .         | AC       | A       | . | PASS | CHTF18   | exonic     |
| ACaP0 | 17 | 46673923 | .         | CGCCGC   | C       | . | PASS | HOXB6    | exonic     |
| ACaP0 | 19 | 36237318 | .         | A        | AG      | . | PASS | PSENNEN  | splicing   |
| ACaP0 | MT | 9531     | rs2676066 | A        | AC      | . | PASS | .        | intergenic |
| ACaP0 | 20 | 13765944 | .         | C        | CGCGGG  | . | PASS | NDUFAF5  | intronic   |
| ACaP1 | 17 | 18159768 | .         | GC       | G       | . | PASS | FLII     | intronic   |
| ACaP1 | 1  | 43770851 | rs7519299 | C        | CG      | . | PASS | TIE1     | intronic   |
| ACaP1 | 8  | 14095086 | .         | CCCCAAAC | .       | . | PASS | SGCZ     | exonic     |



|         |    |          |           |         |        |   |      |          |            |
|---------|----|----------|-----------|---------|--------|---|------|----------|------------|
| ACaP1:  | 9  | 1.4E+08  | .         | T       | TG     | . | PASS | ENTPD2   | exonic     |
| ACaP1:  | 11 | 1.32E+08 | .         | ATCT    | A      | . | PASS | NTM      | intronic   |
| ACaP1:  | 14 | 68162286 | .         | T       | TA     | . | PASS | RDH11    | intronic   |
| ACaP1:  | 22 | 42557265 | rs7666083 | CGGGCG  | C      | . | PASS | TCF20    | UTR3       |
| ACaP1:  | 2  | 23925992 | .         | C       | CTTG   | . | PASS | KLHL29   | intronic   |
| ACaP1:  | 5  | 56719286 | .         | CAAGGG  | C      | . | PASS | .        | intergenic |
| ACaP1:  | 9  | 1.31E+08 | .         | G       | GC     | . | PASS | ODF2     | intronic   |
| ACaP1:  | 11 | 6662745  | rs7788921 | CCAGCAG | C      | . | PASS | DCHS1    | exonic     |
| ACaP1:  | 12 | 9907649  | .         | TA      | T      | . | PASS | CD69     | intronic   |
| ACaP1:  | 13 | 99461550 | rs7743913 | TTTTTG  | T      | . | PASS | DOCK9    | intronic   |
| ACaP1:  | 14 | 88892767 | rs7758009 | CG      | C      | . | PASS | SPATA7   | exonic     |
| ACaP1:  | 16 | 67063717 | .         | G       | GT     | . | PASS | CBFB     | splicing   |
| ACaP1:  | 17 | 15410163 | .         | A       | AATTCT | . | PASS | TVP23C-C | intronic   |
| ACaP1:  | 17 | 27044730 | .         | AGAGCG  | A      | . | PASS | NARR,RAE | UTR5       |
| ACaP1:  | 21 | 46900013 | rs7645628 | CCCAGG  | C      | . | PASS | COL18A1  | exonic     |
| ACaP1:  | 22 | 17414848 | .         | AGAGCCC | A      | . | PASS | .        | intergenic |
| ACaP1:X |    | 16888095 | .         | GCCGCG  | G      | . | PASS | RBBP7    | intronic   |
| ACaP1:  | 7  | 6682259  | .         | CGAGGT  | C      | . | PASS | ZNF316   | exonic     |
| ACaP1:  | 8  | 1.08E+08 | .         | TTGATCA | T      | . | PASS | ANGPT1   | intronic   |
| ACaP1:  | 11 | 1.02E+08 | rs6015769 | TA      | T      | . | PASS | BIRC3    | intronic   |
| ACaP1:  | 16 | 69153951 | rs7596499 | GGGGCC  | G      | . | PASS | CHTF8    | UTR3       |
| ACaP1:  | 19 | 46366371 | .         | TCCGCC  | T      | . | PASS | SYMPK    | UTR5       |
| ACaP1:  | 19 | 58002863 | .         | G       | GCTGT  | . | PASS | ZNF419   | exonic     |
| ACaP1:X |    | 48163160 | .         | C       | CT     | . | PASS | SSX9     | ncRNA_int  |
| ACaP1:X |    | 1.07E+08 | .         | A       | AT     | . | PASS | COL4A6   | intronic   |
| ACaP1:  | 3  | 51392370 | .         | AGG     | A      | . | PASS | DOCK3    | exonic     |
| ACaP1:  | 3  | 1.02E+08 | .         | CTT     | C      | . | PASS | NFKBIZ   | exonic     |
| ACaP1:  | 15 | 93632120 | .         | GTCTGCC | G      | . | PASS | RGMA     | intronic   |

| Gene      | GeneDetail  | ExonicFunction | AAChange | Genecode  | wgRna | cytoBand | targetScan | tfbsConsSi |
|-----------|-------------|----------------|----------|-----------|-------|----------|------------|------------|
| NM_01455. | .           | .              | .        | ENST0000. | .     | 2q14.2   | .          | .          |
| NM_00521. | frameshift  | CTLA4:NM       | .        | ENST0000. | .     | 2q33.2   | .          | Score=999  |
| NR_00366  | dist=48933. | .              | .        | .         | .     | 6p11.1   | .          | .          |
| NM_00586. | nonframes   | BET1:NM        | .        | ENST0000. | .     | 7q21.3   | .          | .          |
| NM_02495. | .           | .              | .        | ENST0000. | .     | 12q24.13 | .          | .          |
| NM_00101. | frameshift  | VPS13C:NM      | .        | ENST0000. | .     | 15q22.2  | .          | .          |
| NM_00355. | nonframes   | OR1G1:NM       | .        | ENST0000. | .     | 17p13.3  | .          | .          |
| NM_17213. | .           | .              | .        | ENST0000. | .     | 19q13.2  | .          | .          |
| NM_01336. | frameshift  | DNMT3L:NM      | .        | ENST0000. | .     | 21q22.3  | .          | .          |
| NM_00103. | .           | .              | .        | ENST0000. | .     | Xp11.22  | .          | .          |
| NM_00116. | nonframes   | ANKRD33        | .        | ENST0000. | .     | 5p15.2   | .          | Score=807  |
| NM_00115. | .           | .              | .        | ENST0000. | .     | 13q12.3  | .          | .          |
| NM_00110  | NM_00110.   | .              | .        | ENST0000. | .     | 14q24.1  | .          | .          |
| NM_00127. | frameshift  | ANKLE1:NM      | .        | ENST0000. | .     | 19p13.11 | .          | .          |
| NM_00587. | .           | .              | .        | ENST0000. | .     | 22q12.2  | .          | .          |
| NM_00577. | nonframes   | RBM6:NM        | .        | ENST0000. | .     | 3p21.31  | .          | Score=905  |
| NM_00062. | frameshift  | LTBP1:NM       | .        | ENST0000. | .     | 2p22.3   | .          | Score=979  |
| NM_00578  | dist=2844;. | .              | .        | ENST0000. | .     | 3q29     | .          | .          |
| NM_00103. | .           | .              | .        | ENST0000. | .     | 16p12.2  | .          | .          |
| NR_12616. | .           | .              | .        | ENST0000. | .     | 16q24.3  | .          | .          |
| NR_04598. | .           | .              | .        | ENST0000. | .     | 17p13.1  | .          | .          |
| NM_15320. | .           | .              | .        | ENST0000. | .     | 17q25.1  | .          | .          |
| NM_01565. | .           | .              | .        | ENST0000. | .     | 1p36.33  | .          | .          |
| NR_03886. | .           | .              | .        | ENST0000. | .     | 1p36.33  | .          | .          |
| NM_00125. | .           | .              | .        | ENST0000. | .     | 1p36.33  | .          | .          |
| NM_00114. | .           | .              | .        | ENST0000. | .     | 1p36.33  | .          | .          |
| NM_00103. | .           | .              | .        | ENST0000. | .     | 1p36.33  | .          | .          |
| NM_00106. | .           | .              | .        | ENST0000. | .     | 1p36.22  | .          | .          |
| NM_02076. | frameshift  | UBR4:NM        | .        | ENST0000. | .     | 1p36.13  | .          | .          |
| NM_00601. | frameshift  | ARID1A:NM      | .        | ENST0000. | .     | 1p36.11  | .          | Score=894  |
| NM_01209. | .           | .              | .        | ENST0000. | .     | 1p34.3   | .          | .          |
| NM_01209. | .           | .              | .        | ENST0000. | .     | 1p34.3   | .          | .          |
| NM_00112. | .           | .              | .        | ENST0000. | .     | 1p34.2   | .          | .          |
| NM_03202. | .           | .              | .        | ENST0000. | .     | 1p31.3   | .          | .          |
| NM_15289. | frameshift  | COL24A1:NM     | .        | ENST0000. | .     | 1p22.3   | .          | .          |
| NM_00651. | .           | .              | .        | ENST0000. | .     | 1p13.3   | .          | .          |
| NM_00104. | .           | .              | .        | ENST0000. | .     | 1p13.2   | .          | .          |
| NM_00107. | .           | .              | .        | ENST0000. | .     | 1q21.2   | .          | .          |
| NM_01758. | frameshift  | UBE2Q1:NM      | .        | ENST0000. | .     | 1q21.3   | .          | Score=833  |
| NM_00129. | frameshift  | CLK2:NM        | .        | ENST0000. | .     | 1q22     | .          | Score=851  |
| NM_00128. | .           | .              | .        | ENST0000. | .     | 1q22     | .          | .          |
| NM_02194. | .           | .              | .        | ENST0000. | .     | 1q23.1   | .          | .          |
| NM_02031. | .           | .              | .        | ENST0000. | .     | 1q25.2   | .          | .          |
| NM_14469. | frameshift  | AXDND1:NM      | .        | ENST0000. | .     | 1q25.2   | .          | .          |
| NM_00135  | NM_00135.   | .              | .        | ENST0000. | .     | 1q25.3   | .          | .          |
| NM_00283. | .           | .              | .        | ENST0000. | .     | 1q31.3   | .          | .          |
| NM_01493. | frameshift  | PLEKHA6:NM     | .        | ENST0000. | .     | 1q32.1   | .          | Score=888  |
| NM_00127. | .           | .              | .        | ENST0000. | .     | 1q42.12  | .          | .          |
| NM_00360. | .           | .              | .        | ENST0000. | .     | 1q42.13  | .          | .          |
| NR_02839. | .           | .              | .        | ENST0000. | .     | 1q42.2   | .          | .          |
| NR_11025  | dist=20359. | .              | .        | .         | .     | 2p25.1   | .          | .          |

|           |             |            |           |         |   |           |
|-----------|-------------|------------|-----------|---------|---|-----------|
| NM_00485. | frameshift  | ROCK2:NM   | ENST0000. | 2p25.1  | . | Score=935 |
| NM_00104. | .           | .          | ENST0000. | 2p23.3  | . | .         |
| NM_00126. | .           | .          | ENST0000. | 2p23.2  | . | .         |
| NM_00111  | dist=64458. | .          | ENST0000. | 2p22.1  | . | .         |
| NM_00264. | .           | .          | ENST0000. | 2p21    | . | .         |
| NM_00100. | frameshift  | MTIF2:NM   | ENST0000. | 2p16.1  | . | .         |
| NM_03260. | frameshift  | LOXL3:NM   | ENST0000. | 2p13.1  | . | .         |
| NM_01662. | .           | .          | ENST0000. | 2p11.2  | . | .         |
| NM_00102. | .           | .          | ENST0000. | 2q11.2  | . | .         |
| NM_01455. | .           | .          | ENST0000. | 2q14.2  | . | .         |
| NM_00127. | frameshift  | ACVR2A:NM  | ENST0000. | 2q22.3  | . | .         |
| NM_00117. | frameshift  | CSRNP3:NM  | ENST0000. | 2q24.3  | . | .         |
| NR_11059. | .           | .          | ENST0000. | 2q24.3  | . | .         |
| NM_00119. | frameshift  | XIRP2:NM   | ENST0000. | 2q24.3  | . | .         |
| NM_00125. | frameshift  | ATF2:NM    | ENST0000. | 2q31.1  | . | .         |
| NM_00107. | .           | .          | ENST0000. | 2q31.2  | . | .         |
| NR_03166. | .           | .          | ENST0000. | 2q31.2  | . | .         |
| NM_00125. | stopgain    | TTN:NM     | ENST0000. | 2q31.2  | . | .         |
| NM_00731. | frameshift  | STAT1:NM   | ENST0000. | 2q32.2  | . | .         |
| NM_00128. | .           | .          | ENST0000. | 2q33.1  | . | .         |
| NM_00126. | .           | .          | ENST0000. | 2q33.1  | . | .         |
| NM_00381. | frameshift  | ADAM23:NM  | ENST0000. | 2q33.3  | . | .         |
| NM_00113. | frameshift  | FASTKD2:NM | ENST0000. | 2q33.3  | . | .         |
| NM_00112. | .           | .          | ENST0000. | 2q33.3  | . | .         |
| NM_00100  | NM_00100.   | .          | ENST0000. | 2q35    | . | .         |
| NM_00114. | frameshift  | SPHKAP:NM  | ENST0000. | 2q36.3  | . | .         |
| NM_00100. | frameshift  | DNAJB3:NM  | ENST0000. | 2q37.1  | . | .         |
| NM_01480. | .           | .          | ENST0000. | 2q37.3  | . | .         |
| NM_00128. | frameshift  | CNTN6:NM   | ENST0000. | 3p26.3  | . | Score=844 |
| NM_15253  | NM_15253.   | .          | ENST0000. | 3p25.1  | . | .         |
| NM_00114. | .           | .          | ENST0000. | 3p24.2  | . | .         |
| NM_01401. | .           | .          | ENST0000. | 3p21.31 | . | .         |
| NM_01546. | nonframes   | PTPN23:NM  | ENST0000. | 3p21.31 | . | .         |
| NM_00577. | frameshift  | RBM6:NM    | ENST0000. | 3p21.31 | . | .         |
| NR_10998. | .           | .          | ENST0000. | 3p21.2  | . | .         |
| NM_00625. | frameshift  | PRKCD:NM   | ENST0000. | 3p21.1  | . | .         |
| NM_00072. | .           | .          | ENST0000. | 3p21.1  | . | .         |
| NM_01541. | .           | .          | ENST0000. | 3q13.2  | . | .         |
| NM_01404. | .           | .          | ENST0000. | 3q21.3  | . | .         |
| NM_00103. | frameshift  | FAIM:NM    | ENST0000. | 3q22.3  | . | .         |
| NM_00114. | .           | .          | ENST0000. | 3q25.1  | . | .         |
| NM_02103. | .           | .          | ENST0000. | 3q25.1  | . | .         |
| NM_01493. | .           | .          | ENST0000. | 3q26.31 | . | .         |
| NM_00374. | .           | .          | ENST0000. | 3q27.1  | . | .         |
| NR_02456. | .           | .          | ENST0000. | 4p16.3  | . | .         |
| NM_02089. | frameshift  | UVSSA:NM   | ENST0000. | 4p16.3  | . | .         |
| NM_05304  | dist=49825. | .          | ENST0000. | 4p16.1  | . | .         |
| NM_01829. | .           | .          | ENST0000. | 4p14    | . | .         |
| NM_00111. | .           | .          | ENST0000. | 4p13    | . | .         |
| NM_15254. | nonframes   | SCFD2:NM   | ENST0000. | 4q12    | . | .         |
| NM_15240. | .           | .          | ENST0000. | 4q12    | . | .         |
| NM_00109. | frameshift  | PRDM8:NM   | ENST0000. | 4q21.21 | . | .         |
| NM_00112. | .           | .          | ENST0000. | 4q22.3  | . | .         |
| NM_00117. | .           | .          | ENST0000. | 4q25    | . | .         |

|                      |            |                      |         |   |           |
|----------------------|------------|----------------------|---------|---|-----------|
| NM_00122.            | .          | ENST0000.            | 4q26    | . | .         |
| NM_02459.            | frameshift | ARSJ:NM_ENST0000.    | 4q26    | . | .         |
| NM_00129.            | nonframes  | FAT4:NM_ENST0000.    | 4q28.1  | . | Score=956 |
| NM_01824.            | frameshift | NEIL3:NM_ENST0000.   | 4q34.3  | . | .         |
| NM_00100.            | .          | ENST0000.            | 4q35.2  | . | .         |
| NR_00326.            | .          | ENST0000.            | 5p15.33 | . | .         |
| NM_00711.            | frameshift | TRIO:NM_ENST0000.    | 5p15.2  | . | .         |
| NM_05402             | NM_05402.  | ENST0000.            | 5p15.2  | . | .         |
| NM_03095.            | .          | ENST0000.            | 5p13.3  | . | .         |
| NM_02307.            | .          | ENST0000.            | 5p13.2  | . | .         |
| NM_00399.            | .          | ENST0000.            | 5p13.1  | . | .         |
| NM_00128.            | .          | ENST0000.            | 5q13.3  | . | .         |
| NM_00127.            | .          | ENST0000.            | 5q14.1  | . | .         |
| NM_00103.            | .          | ENST0000.            | 5q31.3  | . | .         |
| NM_01891.            | frameshift | PCDHGA3 ENST0000.    | 5q31.3  | . | .         |
| NM_01531.            | frameshift | LARP1:NM ENST0000.   | 5q33.2  | . | .         |
| NM_00127.            | frameshift | SLIT3:NM_ENST0000.   | 5q34    | . | Score=781 |
| NM_00127.            | .          | ENST0000.            | 5q34    | . | .         |
| NM_00150.            | .          | ENST0000.            | 6p22.1  | . | .         |
| NM_00128.            | .          | ENST0000.            | 6p21.33 | . | .         |
| NM_00692.            | .          | ENST0000.            | 6p21.33 | . | .         |
| NM_00120.            | frameshift | AGER:NM ENST0000.    | 6p21.32 | . | .         |
| NM_00258.            | .          | ENST0000.            | 6p21.32 | . | .         |
| NM_00211.            | .          | ENST0000.            | 6p21.32 | . | .         |
| NM_00128.            | frameshift | C6orf89:NI ENST0000. | 6p21.2  | . | Score=724 |
| NM_00101.            | frameshift | FOXP4:NM ENST0000.   | 6p21.1  | . | Score=998 |
| NM_00128.            | .          | ENST0000.            | 6q14.1  | . | .         |
| NM_01549             | NM_01549.  | ENST0000.            | 6q16.2  | . | .         |
| NM_00506.            | .          | ENST0000.            | 6q16.3  | . | .         |
| NM_00116.            | frameshift | GRIK2:NM ENST0000.   | 6q16.3  | . | Score=835 |
| NM_00108.            | frameshift | BEND3:NM ENST0000.   | 6q21    | . | .         |
| NM_01859.            | .          | ENST0000.            | 6q21    | . | .         |
| NM_00116.            | frameshift | TRAF3IP2 ENST0000.   | 6q21    | . | .         |
| NM_00110.            | .          | ENST0000.            | 6q21    | . | .         |
| NM_15273.            | frameshift | TBC1D32: ENST0000.   | 6q22.31 | . | Score=837 |
| NM_00114.            | frameshift | HBS1L:NM ENST0000.   | 6q23.3  | . | .         |
| NM_00110.            | frameshift | PHACTR2 ENST0000.    | 6q24.2  | . | .         |
| NM_00127.            | .          | ENST0000.            | 6q25.3  | . | .         |
| NM_00087.            | .          | ENST0000.            | 6q25.3  | . | .         |
| NONE,NR_dist=NONE.   | .          | ENST0000.            | 7p22.3  | . | .         |
| NR_00128 dist=46754. | .          | .                    | 7p22.3  | . | .         |
| NM_01805.            | frameshift | RADIL:NM ENST0000.   | 7p22.1  | . | .         |
| NM_00108.            | frameshift | TNRC18:N ENST0000.   | 7p22.1  | . | Score=858 |
| NM_00592             | NM_00592.  | ENST0000.            | 7p21.2  | . | .         |
| NR_12050 dist=21149. | .          | ENST0000.            | 7p15.2  | . | .         |
| NM_00609.            | .          | ENST0000.            | 7p14.3  | . | .         |
| NM_00609.            | frameshift | NOD1:NM ENST0000.    | 7p14.3  | . | .         |
| NM_01869.            | frameshift | LANCL2:N ENST0000.   | 7p11.2  | . | .         |
| NM_00115.            | frameshift | ZNF716:NI ENST0000.  | 7p11.2  | . | .         |
| NM_00119.            | .          | ENST0000.            | 7q11.23 | . | .         |
| NM_00050.            | .          | ENST0000.            | 7q11.23 | . | .         |
| NM_00127.            | .          | ENST0000.            | 7q22.1  | . | .         |
| NM_17356.            | frameshift | NYAP1:NM ENST0000.   | 7q22.1  | . | .         |
| NM_00444.            | .          | ENST0000.            | 7q22.1  | . | .         |

|                      |            |            |           |          |             |           |
|----------------------|------------|------------|-----------|----------|-------------|-----------|
| NM_00120.            | frameshift | CUX1:NM_   | ENST0000. | 7q22.1   | .           | Score=824 |
| NM_20716.            | nonframes  | LMOD2:NM_  | ENST0000. | 7q31.32  | .           | .         |
| NM_02029.            | .          | .          | ENST0000. | 7q33     | .           | .         |
| NM_17368.            | unknown    | UNKNO      | ENST0000. | 7q36.1   | .           | Score=822 |
| NM_00103.            | .          | .          | ENST0000. | 7q36.2   | .           | .         |
| NM_13871.            | .          | .          | ENST0000. | 8p22     | .           | .         |
| NM_01531.            | .          | .          | ENST0000. | 8p22     | .           | .         |
| NM_13927 dist=2934;  | .          | .          | ENST0000. | 8p21.3   | .           | Score=946 |
| NM_00112 dist=25494. | .          | .          | ENST0000. | 8p21.2   | .           | .         |
| NM_00115.            | .          | .          | ENST0000. | 8p12     | .           | .         |
| NR_00312.            | .          | .          | ENST0000. | 8p11.22  | .           | .         |
| NM_00111.            | .          | .          | ENST0000. | 8q12.1   | .           | .         |
| NM_00128             | NM_00128.  | .          | ENST0000. | 8q21.13  | .           | .         |
| NM_00103.            | frameshift | ESRP1:NM_  | ENST0000. | 8q22.1   | .           | .         |
| NM_00110.            | .          | .          | ENST0000. | 8q22.3   | .           | .         |
| NM_00120.            | .          | .          | ENST0000. | 8q24.22  | .           | .         |
| NM_00170.            | .          | .          | ENST0000. | 8q24.3   | .           | .         |
| NM_00191.            | frameshift | CYC1:NM_   | ENST0000. | 8q24.3   | .           | Score=904 |
| NM_02476.            | .          | .          | ENST0000. | 9p21.2   | .           | .         |
| NM_00113             | NM_00113.  | .          | ENST0000. | 9p13.3   | Score=98;l. | .         |
| NM_00628.            | frameshift | TLN1:NM_   | ENST0000. | 9p13.3   | .           | .         |
| NM_00120 dist=15610. | .          | .          | ENST0000. | 9p11.2   | .           | .         |
| NM_00539.            | frameshift | PHF2:NM_   | ENST0000. | 9q22.31  | .           | .         |
| NM_00026.            | frameshift | PTCH1:NM_  | ENST0000. | 9q22.32  | .           | .         |
| NM_00108             | NM_00108.  | .          | ENST0000. | 9q22.32  | .           | .         |
| NM_00108.            | .          | .          | ENST0000. | 9q31.3   | .           | .         |
| NM_00100.            | frameshift | OR1L3:NM_  | ENST0000. | 9q33.2   | .           | .         |
| NM_00117.            | nonframes  | STRBP:NM_  | ENST0000. | 9q33.3   | .           | .         |
| NM_00117.            | .          | .          | ENST0000. | 9q33.3   | .           | .         |
| NM_00128.            | .          | .          | ENST0000. | 9q34.11  | .           | .         |
| NM_03272.            | .          | .          | ENST0000. | 9q34.13  | .           | .         |
| NM_00128.            | frameshift | PMPCA:NI   | ENST0000. | 9q34.3   | .           | .         |
| NM_17846.            | .          | .          | ENST0000. | 9q34.3   | .           | .         |
| NM_00103.            | .          | .          | ENST0000. | 9q34.3   | .           | .         |
| NM_18324.            | frameshift | C9orf142:† | ENST0000. | 9q34.3   | .           | .         |
| NM_00101.            | frameshift | SFMBT2:†   | ENST0000. | 10p14    | .           | .         |
| NM_00081.            | .          | .          | ENST0000. | 10p12.1  | .           | .         |
| NM_00127.            | frameshift | C10orf126  | ENST0000. | 10p12.1  | .           | .         |
| NR_02763.            | .          | .          | ENST0000. | 10q11.22 | .           | .         |
| NM_00128             | NM_00128.  | .          | ENST0000. | 10q21.3  | .           | .         |
| NM_00125.            | .          | .          | ENST0000. | 10q22.1  | .           | .         |
| NM_08072.            | frameshift | ADAMTS1    | ENST0000. | 10q22.1  | .           | .         |
| NM_00124.            | frameshift | ZSWIM8:†   | ENST0000. | 10q22.2  | .           | Score=991 |
| NM_02033.            | .          | .          | ENST0000. | 10q22.3  | .           | .         |
| NM_00115.            | .          | .          | ENST0000. | 10q22.3  | .           | .         |
| NM_13344.            | nonframes  | AGAP11:†   | ENST0000. | 10q23.2  | .           | .         |
| NM_00620.            | .          | .          | ENST0000. | 10q23.33 | .           | .         |
| NM_03272.            | .          | .          | ENST0000. | 10q24.33 | .           | .         |
| NM_00129.            | .          | .          | ENST0000. | 10q26.13 | .           | .         |
| NM_00405.            | .          | .          | ENST0000. | 10q26.3  | .           | .         |
| NM_02103.            | .          | .          | ENST0000. | 11p15.5  | .           | .         |
| NM_17853.            | frameshift | B4GALNT    | ENST0000. | 11p15.5  | .           | .         |
| NM_00125.            | frameshift | BRSK2:NM_  | ENST0000. | 11p15.5  | .           | .         |
| NM_03077.            | .          | .          | ENST0000. | 11p15.4  | .           | .         |

|           |             |           |           |          |   |           |
|-----------|-------------|-----------|-----------|----------|---|-----------|
| NM_01446. | frameshift  | RBMXL2:N  | ENST0000. | 11p15.4  | . | .         |
| NM_00541. | .           | .         | ENST0000. | 11p15.4  | . | .         |
| NM_00114. | .           | .         | ENST0000. | 11p15.1  | . | .         |
| NM_00113. | .           | .         | ENST0000. | 11p14.2  | . | .         |
| NM_01614. | .           | .         | ENST0000. | 11p11.2  | . | .         |
| NM_00545. | frameshift  | MAPK8IP1  | ENST0000. | 11p11.2  | . | .         |
| NM_00130. | frameshift  | EML3:NM_  | ENST0000. | 11q12.3  | . | .         |
| NM_00119. | .           | .         | ENST0000. | 11q13.2  | . | .         |
| NM_00161. | .           | .         | ENST0000. | 11q13.2  | . | .         |
| NM_00101. | .           | .         | .         | 11q13.4  | . | .         |
| NM_02079. | frameshift  | USP35:NM  | ENST0000. | 11q14.1  | . | Score=882 |
| NM_00114. | .           | .         | ENST0000. | 11q14.1  | . | .         |
| NM_00100. | frameshift  | FAT3:NM_  | ENST0000. | 11q14.3  | . | .         |
| NM_03339. | .           | .         | ENST0000. | 11q21    | . | .         |
| NM_00120. | frameshift  | JAM3:NM_  | ENST0000. | 11q25    | . | Score=856 |
| NM_00104. | frameshift  | KDM5A:NM  | ENST0000. | 12p13.33 | . | .         |
| NM_01741. | .           | .         | ENST0000. | 12p13.32 | . | .         |
| NM_00112. | .           | .         | ENST0000. | 12p13.31 | . | .         |
| NM_00283. | .           | .         | ENST0000. | 12p13.31 | . | .         |
| NM_00128. | .           | .         | ENST0000. | 12p13.31 | . | .         |
| NM_00125. | frameshift  | CLECL1:N  | ENST0000. | 12p13.31 | . | .         |
| NM_05816  | NM_05816.   | .         | ENST0000. | 12p13.2  | . | .         |
| NM_00119. | .           | .         | ENST0000. | 12p11.23 | . | .         |
| NM_00119. | .           | .         | ENST0000. | 12p11.22 | . | .         |
| NM_17360. | unknown     | UNKNOWI   | ENST0000. | 12q12    | . | .         |
| NM_00471  | dist=1383;( | .         | ENST0000. | 12q12    | . | .         |
| NM_00348. | .           | .         | ENST0000. | 12q13.12 | . | .         |
| NM_00109. | .           | .         | ENST0000. | 12q13.12 | . | .         |
| NM_00061. | .           | .         | ENST0000. | 12q13.12 | . | .         |
| NM_00117. | frameshift  | SCN8A:NM  | ENST0000. | 12q13.13 | . | Score=836 |
| NM_00130. | .           | .         | ENST0000. | 12q13.13 | . | .         |
| NM_01895  | NM_01895.   | .         | ENST0000. | 12q13.13 | . | .         |
| NM_00392. | frameshift  | TIMELESS  | ENST0000. | 12q13.3  | . | Score=866 |
| NM_00125. | frameshift  | MYO1A:NI  | ENST0000. | 12q13.3  | . | .         |
| NM_00233  | NM_00233.   | .         | ENST0000. | 12q13.3  | . | .         |
| NM_05289. | frameshift  | MBD6:NM_  | ENST0000. | 12q13.3  | . | Score=879 |
| NM_01332. | .           | .         | ENST0000. | 12q23.3  | . | .         |
| NM_00616. | .           | .         | ENST0000. | 12q23.3  | . | .         |
| NM_20743. | frameshift  | DNAH10:N  | ENST0000. | 12q24.31 | . | .         |
| NM_00129. | frameshift  | WASF3:NI  | ENST0000. | 13q12.13 | . | .         |
| NM_00114. | .           | .         | ENST0000. | 13q13.3  | . | .         |
| NM_02453. | .           | .         | ENST0000. | 13q34    | . | .         |
| NM_00116. | frameshift  | SAMD4A:N  | ENST0000. | 14q22.2  | . | .         |
| NM_00124. | frameshift  | KIAA0586: | ENST0000. | 14q23.1  | . | .         |
| NM_00127. | .           | .         | ENST0000. | 14q23.1  | . | .         |
| NM_00110. | .           | .         | ENST0000. | 14q24.1  | . | .         |
| NM_02081. | frameshift  | UNC79:NM  | ENST0000. | 14q32.12 | . | .         |
| NM_01803. | .           | .         | ENST0000. | 14q32.2  | . | .         |
| NM_00131. | .           | .         | ENST0000. | 14q32.33 | . | .         |
| NM_00100. | frameshift  | NIPA2:NM  | ENST0000. | 15q11.2  | . | .         |
| NM_02075. | .           | .         | ENST0000. | 15q15.2  | . | .         |
| NR_04648. | .           | .         | ENST0000. | 15q15.3  | . | .         |
| NM_00114. | frameshift  | TP53BP1:I | ENST0000. | 15q15.3  | . | .         |
| NM_00100. | frameshift  | GALK2:NM  | ENST0000. | 15q21.2  | . | Score=807 |

|                         |            |                     |          |   |           |
|-------------------------|------------|---------------------|----------|---|-----------|
| NM_18275.               | .          | ENST0000.           | 15q21.3  | . | .         |
| NM_00128NM_00128.       | .          | ENST0000.           | 15q23    | . | .         |
| NM_00117.               | .          | ENST0000.           | 15q24.1  | . | .         |
| NM_00102.               | .          | ENST0000.           | 15q24.1  | . | .         |
| NM_02077.               | frameshift | ALPK3:NM ENST0000.  | 15q25.3  | . | Score=872 |
| NM_15233.               | frameshift | AGBL1:NM ENST0000.  | 15q25.3  | . | .         |
| NM_00101.               | .          | ENST0000.           | 15q25.3  | . | .         |
| NM_19852.               | frameshift | KIF7:NM_ ENST0000.  | 15q26.1  | . | Score=920 |
| NM_00114.               | .          | ENST0000.           | 15q26.1  | . | .         |
| NM_17884NM_17884.       | .          | ENST0000.           | 16p13.3  | . | .         |
| NM_03257NM_03257.       | .          | ENST0000.           | 16p13.3  | . | .         |
| NM_03256.               | frameshift | GLYR1:NM ENST0000.  | 16p13.3  | . | Score=782 |
| NM_03216.               | .          | ENST0000.           | 16p13.13 | . | .         |
| NM_00128.               | .          | ENST0000.           | 16p13.11 | . | .         |
| NM_00121.               | .          | ENST0000.           | 16p11.2  | . | .         |
| NM_01471.               | .          | ENST0000.           | 16p11.2  | . | .         |
| NM_00111.               | .          | ENST0000.           | 16q12.1  | . | .         |
| NM_00179.               | frameshift | CDH5:NM_ ENST0000.  | 16q21    | . | .         |
| NM_00110.               | frameshift | KCTD19:N ENST0000.  | 16q22.1  | . | Score=899 |
| NM_00107.               | .          | ENST0000.           | 16q22.1  | . | .         |
| NM_00112.               | frameshift | ZNF469:NI ENST0000. | 16q24.2  | . | Score=800 |
| NM_01608.               | .          | ENST0000.           | 17p13.3  | . | .         |
| NM_01522NM_01522.       | .          | ENST0000.           | 17p13.3  | . | .         |
| NR_03771.               | .          | ENST0000.           | 17p13.1  | . | .         |
| NM_00473.               | frameshift | KCNAB3:N ENST0000.  | 17p13.1  | . | Score=942 |
| NM_00125.               | nonframes  | MYH10:NM ENST0000.  | 17p13.1  | . | Score=826 |
| NM_00026.               | .          | ENST0000.           | 17q11.2  | . | .         |
| NM_00114.               | .          | ENST0000.           | 17q12    | . | .         |
| NM_01508.               | frameshift | CDK12:NM ENST0000.  | 17q12    | . | Score=922 |
| NM_00128.               | .          | ENST0000.           | 17q21.2  | . | .         |
| NM_00127.               | frameshift | AOC3:NM_ ENST0000.  | 17q21.31 | . | .         |
| NM_00100.               | frameshift | GPATCH8 ENST0000.   | 17q21.31 | . | .         |
| NM_00589.               | .          | ENST0000.           | 17q21.31 | . | Score=968 |
| NM_00100.               | .          | ENST0000.           | 17q21.32 | . | .         |
| NM_00114NM_00114.       | .          | ENST0000.           | 17q21.32 | . | .         |
| NM_00113.               | .          | ENST0000.           | 17q21.32 | . | .         |
| NM_02509.               | frameshift | USP36:NM ENST0000.  | 17q25.3  | . | .         |
| NM_00104.               | .          | ENST0000.           | 17q25.3  | . | .         |
| NM_00116 dist=2490;(.). | .          | ENST0000.           | 17q25.3  | . | .         |
| NM_00412.               | .          | ENST0000.           | 17q25.3  | . | .         |
| NM_01529.               | .          | ENST0000.           | 18p11.32 | . | .         |
| NM_00127.               | .          | ENST0000.           | 18p11.21 | . | .         |
| NM_00100.               | .          | ENST0000.           | 18p11.21 | . | .         |
| NM_00027.               | frameshift | NPC1:NM_ ENST0000.  | 18q11.2  | . | .         |
| NM_00129.               | .          | ENST0000.           | 18q11.2  | . | .         |
| NM_00120.               | .          | ENST0000.           | 18q12.2  | . | .         |
| NM_00114.               | .          | ENST0000.           | 18q21.1  | . | .         |
| NM_00119.               | nonframes  | SMAD7:NM ENST0000.  | 18q21.1  | . | .         |
| NM_05294.               | frameshift | ALPK2:NM ENST0000.  | 18q21.32 | . | .         |
| NM_00110.               | .          | ENST0000.           | 19p13.3  | . | .         |
| NM_01895.               | frameshift | DAZAP1:N ENST0000.  | 19p13.3  | . | Score=879 |
| NM_01517.               | frameshift | ZFR2:NM_ ENST0000.  | 19p13.3  | . | .         |
| NM_00128.               | .          | ENST0000.           | 19p13.3  | . | .         |
| NM_13915.               | .          | ENST0000.           | 19p13.3  | . | .         |

|                      |            |           |           |          |   |           |
|----------------------|------------|-----------|-----------|----------|---|-----------|
| NM_00129.            | .          | .         | ENST0000. | 19p13.3  | . | .         |
| NM_00285.            | .          | .         | ENST0000. | 19p13.3  | . | .         |
| NM_00285.            | frameshift | PTPRS:NM  | ENST0000. | 19p13.3  | . | .         |
| NM_00209.            | .          | .         | ENST0000. | 19p13.3  | . | .         |
| NM_00006.            | frameshift | C3:NM_00  | ENST0000. | 19p13.3  | . | .         |
| NM_01233.            | .          | .         | ENST0000. | 19p13.2  | . | .         |
| NM_15265.            | .          | .         | ENST0000. | 19p13.2  | . | .         |
| NM_00021.            | .          | .         | ENST0000. | 19p13.11 | . | .         |
| NM_00109.            | frameshift | CRTC1:NM  | ENST0000. | 19p13.11 | . | .         |
| NM_17347.            | .          | .         | ENST0000. | 19q13.11 | . | .         |
| NM_00549.            | .          | .         | ENST0000. | 19q13.11 | . | .         |
| NM_00530.            | .          | .         | ENST0000. | 19q13.12 | . | .         |
| NM_01472.            | frameshift | KMT2B:NM  | ENST0000. | 19q13.12 | . | .         |
| NM_00125.            | frameshift | ZNF382:NI | ENST0000. | 19q13.12 | . | .         |
| NM_00101.            | .          | .         | ENST0000. | 19q13.12 | . | .         |
| NM_01507.            | unknown    | UNKNOWI   | ENST0000. | 19q13.13 | . | Score=755 |
| NM_00130 dist=34840. | .          | .         | ENST0000. | 19q13.31 | . | .         |
| NM_19885.            | frameshift | PHLDB3:N  | ENST0000. | 19q13.31 | . | .         |
| NM_19847.            | frameshift | NKPD1:NM  | ENST0000. | 19q13.32 | . | .         |
| NM_00119.            | frameshift | MARK4:NM  | ENST0000. | 19q13.32 | . | Score=755 |
| NM_00119.            | .          | .         | ENST0000. | 19q13.32 | . | .         |
| NM_00459NM_00459.    | .          | .         | ENST0000. | 19q13.32 | . | .         |
| NM_02070.            | frameshift | PNMAL2:N  | ENST0000. | 19q13.32 | . | Score=766 |
| NM_01571.            | frameshift | GLTSCR1:  | ENST0000. | 19q13.33 | . | .         |
| NM_00129.            | frameshift | BAX:NM_C  | ENST0000. | 19q13.33 | . | Score=836 |
| NM_00627.            | .          | .         | ENST0000. | 19q13.33 | . | .         |
| NM_00485.            | .          | .         | ENST0000. | 19q13.33 | . | .         |
| NM_01444.            | .          | .         | ENST0000. | 19q13.41 | . | .         |
| NM_00108NM_00108.    | .          | .         | ENST0000. | 19q13.42 | . | .         |
| NM_00100.            | .          | .         | ENST0000. | 19q13.42 | . | .         |
| NM_03243.            | frameshift | BRSK1:NM  | ENST0000. | 19q13.42 | . | .         |
| NM_00396.            | .          | .         | ENST0000. | 19q13.43 | . | .         |
| NM_00111.            | .          | .         | ENST0000. | 20p13    | . | .         |
| NM_00113.            | .          | .         | ENST0000. | 20p13    | . | .         |
| NM_00127.            | .          | .         | ENST0000. | 20p12.1  | . | .         |
| NM_00104.            | .          | .         | ENST0000. | 20p12.1  | . | .         |
| NM_01533.            | frameshift | ASXL1:NM  | ENST0000. | 20q11.21 | . | Score=888 |
| NM_00107.            | .          | .         | ENST0000. | 20q11.22 | . | .         |
| NR_10993.            | .          | .         | ENST0000. | 20q11.23 | . | .         |
| NM_02247NM_02247.    | .          | .         | ENST0000. | 20q11.23 | . | .         |
| NM_00524.            | .          | .         | ENST0000. | 20q13.12 | . | .         |
| NM_01789.            | frameshift | DDX27:NM  | ENST0000. | 20q13.13 | . | .         |
| NM_00451.            | .          | .         | ENST0000. | 20q13.33 | . | .         |
| NM_00103.            | .          | .         | ENST0000. | 20q13.33 | . | .         |
| NR_10992 dist=98028. | .          | .         | ENST0000. | 21q21.1  | . | .         |
| NM_00665.            | frameshift | FTCD:NM_  | ENST0000. | 21q22.3  | . | .         |
| NM_00390.            | frameshift | MCM3AP:I  | ENST0000. | 21q22.3  | . | Score=976 |
| NM_00124.            | .          | .         | ENST0000. | 22q11.21 | . | .         |
| NR_03373.            | .          | .         | ENST0000. | 22q11.23 | . | .         |
| NM_00243.            | frameshift | MN1:NM_(  | ENST0000. | 22q12.1  | . | Score=869 |
| NM_00100.            | .          | .         | ENST0000. | 22q12.2  | . | .         |
| NM_05290NM_05290.    | .          | .         | ENST0000. | 22q13.1  | . | .         |
| NM_15224.            | frameshift | CDC42EP:  | ENST0000. | 22q13.1  | . | Score=888 |
| NR_02778.            | .          | .         | ENST0000. | 22q13.2  | . | .         |



|           |             |           |           |          |   |           |
|-----------|-------------|-----------|-----------|----------|---|-----------|
| NM_01642. | frameshift  | GTSE1:NM  | ENST0000. | 22q13.31 | . | .         |
| NM_02520. | .           | .         | ENST0000. | 22q13.33 | . | .         |
| NM_01323. | frameshift  | PPP2R3B:  | ENST0000. | Xp22.33  | . | .         |
| NM_00035. | .           | .         | ENST0000. | Xp22.31  | . | .         |
| NM_00116. | .           | .         | ENST0000. | Xp22.12  | . | .         |
| NM_00119. | .           | .         | ENST0000. | Xp11.4   | . | .         |
| NM_00111. | .           | .         | ENST0000. | Xp11.23  | . | .         |
| NM_00103. | .           | .         | ENST0000. | Xp11.23  | . | .         |
| NR_04664. | .           | .         | ENST0000. | Xp11.23  | . | .         |
| NM_00388. | .           | .         | ENST0000. | Xp11.22  | . | .         |
| NM_13870. | frameshift  | MAGEE2:NM | ENST0000. | Xq13.3   | . | .         |
| NM_00104  | NM_00104.   | .         | ENST0000. | Xq26.3   | . | .         |
| NM_00116. | frameshift  | PLXNB3:NM | ENST0000. | Xq28     | . | .         |
| NM_00145. | nonframes   | FOXC1:NM  | ENST0000. | 6p25.3   | . | .         |
| NM_00120  | NM_00120.   | .         | ENST0000. | 11q13.5  | . | .         |
| NM_00110. | .           | .         | ENST0000. | 19p13.3  | . | .         |
| NM_00119  | NM_00119.   | .         | ENST0000. | 1p34.2   | . | .         |
| NM_00101  | NM_00101.   | .         | ENST0000. | 2q24.1   | . | .         |
| NM_14463. | frameshift  | KCNH8:NM  | ENST0000. | 3p24.3   | . | .         |
| NM_00116. | .           | .         | ENST0000. | 13q14.13 | . | .         |
| NM_00127. | nonframes   | CCDC177:  | ENST0000. | 14q24.1  | . | .         |
| NR_03884  | dist=76944. | .         | ENST0000. | 15q11.2  | . | .         |
| NM_00100  | NM_00100.   | .         | ENST0000. | 1p32.3   | . | .         |
| NM_01613. | .           | .         | ENST0000. | 2q14.2   | . | .         |
| NM_01613. | .           | .         | ENST0000. | 2q14.2   | . | .         |
| NM_02124. | nonframes   | RRAGD:NM  | ENST0000. | 6q15     | . | .         |
| NM_00104. | .           | .         | ENST0000. | 9q33.3   | . | .         |
| NM_00252. | nonframes   | NPTX1:NM  | ENST0000. | 17q25.3  | . | Score=699 |
| NM_00128  | NM_00128.   | .         | ENST0000. | 18q12.2  | . | .         |
| NM_01665. | frameshift  | ZAK:NM_0  | ENST0000. | 2q31.1   | . | .         |
| NM_01695  | NM_01695.   | .         | .         | 4p15.2   | . | .         |
| NM_00422. | nonframes   | CYTH3:NM  | ENST0000. | 7p22.1   | . | .         |
| NONE, NR_ | dist=NONE.  | .         | ENST0000. | 11p15.5  | . | .         |
| NM_00540. | frameshift  | SALL2:NM  | ENST0000. | 14q11.2  | . | .         |
| NM_00100. | .           | .         | ENST0000. | 17p13.1  | . | .         |
| NM_00103. | frameshift  | NBPF8:NM  | ENST0000. | 1q21.2   | . | .         |
| NM_00127. | .           | .         | ENST0000. | 2q31.1   | . | .         |
| NM_00389. | frameshift  | SYNJ2:NM  | ENST0000. | 6q25.3   | . | .         |
| NM_00623. | frameshift  | POLE:NM_  | ENST0000. | 12q24.33 | . | .         |
| NM_00054. | nonframes   | TP53:NM_  | ENST0000. | 17p13.1  | . | .         |
| NM_00119. | nonframes   | TRPM4:NM  | ENST0000. | 19q13.33 | . | .         |
| NM_01614. | frameshift  | SHANK1:NM | ENST0000. | 19q13.33 | . | Score=985 |
| NM_00607  | NM_00607.   | .         | ENST0000. | 22q12.3  | . | .         |
| NM_00100. | .           | .         | ENST0000. | 3q27.2   | . | .         |
| NM_02036. | nonframes   | UTP3:NM_  | ENST0000. | 4q13.3   | . | .         |
| NM_20737. | nonframes   | SKIDA1:NM | ENST0000. | 10p12.31 | . | .         |
| NM_02209. | frameshift  | CHTF18:NM | ENST0000. | 16p13.3  | . | .         |
| NM_01895. | frameshift  | HOXB6:NM  | ENST0000. | 17q21.32 | . | .         |
| NM_00128  | NM_00128.   | .         | ENST0000. | 19q13.12 | . | Score=926 |
| NONE, NO_ | dist=NONE.  | .         | .         | .        | . | .         |
| NM_00103. | .           | .         | ENST0000. | 20p12.1  | . | .         |
| NM_00125. | .           | .         | ENST0000. | 17p11.2  | . | .         |
| NM_00125. | .           | .         | ENST0000. | 1p34.2   | . | .         |
| NM_13916. | frameshift  | SGCZ:NM_  | ENST0000. | 8p22     | . | .         |

|           |              |           |           |          |   |           |
|-----------|--------------|-----------|-----------|----------|---|-----------|
| NM_00124. | frameshift i | ENTPD2:N  | ENST0000. | 9q34.3   | . | .         |
| NM_00104. | .            | .         | ENST0000. | 11q25    | . | .         |
| NM_00125. | .            | .         | ENST0000. | 14q24.1  | . | .         |
| NM_00565  | NM_00565.    | .         | ENST0000. | 22q13.2  | . | .         |
| NM_05292. | .            | .         | ENST0000. | 2p24.1   | . | .         |
| NM_02291  | dist=15878.  | .         | ENST0000. | 5q11.2   | . | .         |
| NM_00124. | .            | .         | ENST0000. | 9q34.11  | . | .         |
| NM_00373. | nonframes    | DCHS1:NM  | ENST0000. | 11p15.4  | . | .         |
| NM_00178. | .            | .         | ENST0000. | 12p13.31 | . | .         |
| NM_00113. | .            | .         | ENST0000. | 13q32.3  | . | .         |
| NM_00104. | frameshift i | SPATA7:N  | ENST0000. | 14q31.3  | . | .         |
| NM_00175  | NM_00175.    | .         | ENST0000. | 16q22.1  | . | .         |
| NM_00120. | .            | .         | ENST0000. | 17p12    | . | .         |
| NM_00114  | NM_00114.    | .         | ENST0000. | 17q11.2  | . | .         |
| NM_03058. | nonframes    | COL18A1:  | ENST0000. | 21q22.3  | . | .         |
| NR_00360  | dist=10462.  | .         | ENST0000. | 22q11.1  | . | .         |
| NM_00289. | .            | .         | ENST0000. | Xp22.2   | . | Score=911 |
| NM_00127. | nonframes    | ZNF316:NI | ENST0000. | 7p22.1   | . | .         |
| NM_00114. | .            | .         | ENST0000. | 8q23.1   | . | .         |
| NM_00116. | .            | .         | ENST0000. | 11q22.2  | . | .         |
| NM_00103  | NM_00103.    | .         | ENST0000. | 16q22.1  | . | .         |
| NM_00481  | NM_00481.    | .         | ENST0000. | 19q13.32 | . | .         |
| NM_00109. | frameshift i | ZNF419:NI | ENST0000. | 19q13.43 | . | .         |
| NR_07339. | .            | .         | ENST0000. | Xp11.23  | . | .         |
| NM_00128. | .            | .         | ENST0000. | Xq22.3   | . | .         |
| NM_00494. | frameshift i | DOCK3:NM  | ENST0000. | 3p21.2   | . | .         |
| NM_00100. | frameshift i | NFKBIZ:NI | ENST0000. | 3q12.3   | . | .         |
| NM_02021. | .            | .         | ENST0000. | 15q26.1  | . | .         |

| genomicSt  | Repeat     | avsnp150  | cosmic82  | clinvar_20 | gwasCatal | 1000g2015 | 1000g2015 | 1000g2015 |
|------------|------------|-----------|-----------|------------|-----------|-----------|-----------|-----------|
| .          | .          | .         | ID=COSM1. | .          | .         | .         | .         | .         |
| .          | Score=118  | rs6078884 | .         | .          | .         | .         | .         | .         |
| Score=0.9; | .          | .         | .         | .          | .         | .         | .         | .         |
| .          | .          | rs3773783 | .         | .          | .         | .         | .         | .         |
| .          | .          | .         | .         | .          | .         | .         | .         | .         |
| Score=0.9  | Score=239. | .         | .         | .          | .         | .         | .         | .         |
| .          | Score=344  | rs7821786 | .         | .          | .         | 0.0039    | 0.001589  | .         |
| .          | .          | rs9190283 | .         | .          | .         | .         | .         | .         |
| .          | Score=561  | rs7640343 | .         | .          | .         | .         | .         | .         |
| .          | .          | rs5844903 | .         | .          | .         | 0.1448    | 0.153754  | .         |
| .          | .          | .         | .         | .          | .         | .         | .         | .         |
| .          | .          | .         | ID=COSN1. | .          | .         | .         | .         | .         |
| Score=0.9  | .          | .         | .         | .          | .         | .         | .         | .         |
| Score=0.9  | Score=446. | .         | .         | .          | .         | .         | .         | .         |
| .          | Score=366. | .         | .         | .          | .         | .         | .         | .         |
| .          | .          | rs7760984 | .         | .          | .         | .         | .         | .         |
| .          | .          | rs9376078 | ID=COSN2. | .          | .         | .         | .         | .         |
| .          | .          | rs7790390 | .         | .          | .         | .         | .         | .         |
| .          | .          | .         | .         | .          | .         | .         | .         | .         |
| .          | .          | .         | ID=COSM1. | .          | .         | .         | .         | .         |
| .          | .          | .         | .         | .          | .         | .         | .         | .         |
| .          | .          | rs7712392 | ID=COSN5. | .          | .         | .         | .         | .         |
| .          | .          | rs7686883 | .         | .          | .         | .         | .         | .         |
| .          | .          | rs7700977 | ID=COSN2. | .          | .         | .         | .         | .         |
| .          | .          | .         | .         | .          | .         | .         | .         | .         |
| .          | .          | .         | ID=COSM1. | .          | .         | .         | .         | .         |
| .          | .          | .         | ID=COSM1. | .          | .         | .         | .         | .         |
| .          | .          | rs7584166 | ID=COSM1. | .          | .         | .         | .         | .         |
| .          | .          | rs7537986 | ID=COSN1. | .          | .         | .         | .         | .         |
| .          | .          | rs5395449 | .         | .          | .         | .         | 0.000599  | .         |
| .          | .          | .         | ID=COSM1. | .          | .         | .         | .         | .         |
| .          | .          | rs7594247 | ID=COSM1. | .          | .         | .         | .         | .         |
| .          | .          | rs7703770 | .         | .          | .         | .         | .         | .         |
| .          | .          | .         | .         | .          | .         | .         | .         | .         |
| .          | Score=390  | rs7968975 | .         | .          | .         | .         | .         | .         |

|            |   |   |                     |   |   |   |         |          |
|------------|---|---|---------------------|---|---|---|---------|----------|
| .          | . | . | ID=COSM1.           | . | . | . | .       | .        |
| .          | . | . | rs7808912.          | . | . | . | .       | .        |
| .          | . | . | Score=625.          | . | . | . | .       | .        |
| Score=0.9% | . | . | rs1997131 ID=COSN1. | . | . | . | 0.005   | 0.001597 |
| .          | . | . | .                   | . | . | . | .       | .        |
| .          | . | . | rs7703599 ID=COSM1. | . | . | . | .       | .        |
| .          | . | . | rs7789371 ID=COSM1. | . | . | . | .       | .        |
| .          | . | . | Score=121.          | . | . | . | .       | .        |
| .          | . | . | ID=COSN2.           | . | . | . | .       | .        |
| .          | . | . | .                   | . | . | . | .       | .        |
| .          | . | . | rs7647197 ID=COSM1. | . | . | . | .       | .        |
| .          | . | . | .                   | . | . | . | .       | .        |
| .          | . | . | rs7456483 ID=COSM1. | . | . | . | .       | .        |
| .          | . | . | .                   | . | . | . | .       | .        |
| .          | . | . | ID=COSN2.           | . | . | . | .       | .        |
| .          | . | . | rs7470964.          | . | . | . | .       | .        |
| .          | . | . | .                   | . | . | . | .       | .        |
| .          | . | . | ID=COSM1.           | . | . | . | .       | .        |
| .          | . | . | .                   | . | . | . | .       | .        |
| .          | . | . | ID=COSM1.           | . | . | . | .       | .        |
| .          | . | . | .                   | . | . | . | .       | .        |
| .          | . | . | ID=COSM1.           | . | . | . | .       | .        |
| Score=0.9% | . | . | rs5440185 ID=COSN2. | . | . | . | 0.00619 | .        |
| .          | . | . | .                   | . | . | . | .       | .        |
| .          | . | . | ID=COSM1.           | . | . | . | .       | .        |
| .          | . | . | rs9042896.          | . | . | . | .       | .        |
| .          | . | . | rs7608755 ID=COSN1. | . | . | . | .       | .        |
| .          | . | . | .                   | . | . | . | .       | .        |
| .          | . | . | rs7647092 ID=COSM1. | . | . | . | .       | .        |
| .          | . | . | .                   | . | . | . | .       | .        |
| .          | . | . | ID=COSM1.           | . | . | . | .       | .        |
| .          | . | . | .                   | . | . | . | .       | .        |
| .          | . | . | rs7755820.          | . | . | . | .       | .        |
| .          | . | . | .                   | . | . | . | .       | .        |
| .          | . | . | .                   | . | . | . | .       | .        |
| .          | . | . | ID=COSN1.           | . | . | . | .       | .        |
| .          | . | . | .                   | . | . | . | .       | .        |
| .          | . | . | rs7704742.          | . | . | . | .       | .        |
| .          | . | . | rs7480610.          | . | . | . | .       | .        |
| .          | . | . | rs7646973 ID=COSN2. | . | . | . | .       | .        |
| .          | . | . | rs9281864.          | . | . | . | .       | .        |
| .          | . | . | .                   | . | . | . | .       | .        |
| .          | . | . | rs7525252.          | . | . | . | .       | .        |
| .          | . | . | .                   | . | . | . | .       | .        |
| .          | . | . | ID=COSN2.           | . | . | . | .       | .        |

|            |                    |  |                |
|------------|--------------------|--|----------------|
| Score=234  | rs7641185 ID=COSM1 |  |                |
|            | rs7639462          |  |                |
|            | ID=COSM4           |  |                |
| Score=0.91 |                    |  |                |
| Score=0.91 |                    |  |                |
|            | rs7466549 ID=COSM1 |  |                |
|            | rs7717298          |  |                |
|            |                    |  |                |
|            | rs7625018 ID=COSM2 |  |                |
|            | rs7658478          |  |                |
|            |                    |  |                |
|            | rs7778584          |  |                |
|            | rs7693384 ID=COSM1 |  |                |
|            |                    |  |                |
|            | rs7768326          |  |                |
|            | rs3743843          |  | 0.003 0.000599 |
| Score=0.91 |                    |  |                |
|            | rs7666007          |  |                |
|            | rs7805014          |  |                |
| Score=0.91 | rs7489955 ID=COSM2 |  |                |
|            | rs7612855          |  |                |
|            | rs7600208 ID=COSM1 |  |                |
|            | ID=COSM1           |  |                |
| Score=0.91 | ID=COSM1           |  |                |
|            |                    |  |                |
|            | rs7792033          |  |                |
|            | rs7668254 ID=COSM4 |  |                |
|            | ID=COSM1           |  |                |
|            |                    |  |                |
|            | rs1490463          |  |                |
|            | ID=COSM1           |  |                |
| Score=0.91 | rs7570813          |  |                |
|            | rs7468588 ID=COSM1 |  |                |
|            |                    |  |                |
| Score=0.91 | Score=321          |  |                |
|            | rs1443745          |  |                |
|            |                    |  |                |
|            | rs7542333 ID=COSM1 |  |                |
|            | rs3701666 ID=COSM1 |  |                |
| Score=0.81 |                    |  |                |
|            | rs7470634 ID=COSM1 |  |                |
|            |                    |  |                |
| Score=0.81 | rs7819467          |  |                |
|            | Score=217          |  |                |
|            |                    |  |                |
|            |                    |  |                |
|            |                    |  |                |
|            | rs5592025          |  | 0.004 0.000799 |

|           |           |           |  |  |        |          |          |
|-----------|-----------|-----------|--|--|--------|----------|----------|
|           | rs7594121 |           |  |  |        |          |          |
| Score=0.9 | rs7708715 | Score=568 |  |  |        |          |          |
|           | rs7618495 |           |  |  |        |          |          |
| Score=232 | rs7790763 |           |  |  |        |          |          |
|           | rs1126292 |           |  |  | 0.0198 | 0.04972  |          |
|           | rs3832550 |           |  |  |        |          |          |
|           | ID=COSN   |           |  |  |        |          |          |
|           | rs7782900 | ID=COSN   |  |  |        |          |          |
|           | rs7759500 | ID=COSM   |  |  |        |          |          |
| Score=198 | rs1462533 |           |  |  |        |          |          |
|           | rs7562540 | ID=COSM   |  |  |        |          |          |
|           | rs7648900 |           |  |  |        |          |          |
|           | rs7766165 | ID=COSN   |  |  |        |          |          |
| Score=0.9 | rs5303481 | ID=COSM   |  |  | 0.002  | 0.000599 |          |
|           | ID=COSM   |           |  |  |        |          |          |
|           | ID=COSM   |           |  |  |        |          |          |
| Score=261 | rs7606317 |           |  |  |        |          |          |
|           | rs7792498 | ID=COSM   |  |  |        |          |          |
|           | rs1028985 |           |  |  |        |          |          |
|           | rs7703285 |           |  |  |        |          |          |
|           | rs3675892 |           |  |  | 0.003  | 0.000599 |          |
| Score=402 |           |           |  |  |        |          |          |
|           | rs7517698 |           |  |  |        |          |          |
|           | ID=COSM   |           |  |  |        |          |          |
|           | rs7625775 | ID=COSN   |  |  |        |          |          |
| Score=0.9 | ID=COSN   |           |  |  |        |          |          |
|           | rs7582351 |           |  |  |        |          |          |
|           | rs7542104 |           |  |  |        |          | 0.008387 |
|           | rs7696631 | ID=COSM   |  |  |        |          |          |
|           | ID=COSN   |           |  |  |        |          |          |
|           | rs7488695 |           |  |  |        |          |          |
| Score=0.9 | rs7664186 |           |  |  |        |          |          |
|           | rs7585686 |           |  |  |        |          |          |
|           | rs5534658 |           |  |  | 0.0069 | 0.002196 |          |
| Score=0.9 |           |           |  |  |        |          |          |
|           | ID=COSM   |           |  |  |        |          |          |
|           | rs7518721 | ID=COSM   |  |  |        |          |          |
|           | rs9766384 |           |  |  |        |          |          |



|            |   |                                   |   |   |       |          |
|------------|---|-----------------------------------|---|---|-------|----------|
| .          | . | rs5635626 ID=COSN2.               | . | . | 0.001 | 0.000799 |
| .          | . | rs7515595.                        | . | . | .     | .        |
| .          | . | rs5561116 ID=COSN1.               | . | . | .     | 0.000799 |
| .          | . | .                                 | . | . | .     | .        |
| .          | . | rs7643461 ID=COSM4.               | . | . | .     | .        |
| .          | . | .                                 | . | . | .     | .        |
| .          | . | ID=COSM4.                         | . | . | .     | .        |
| .          | . | .                                 | . | . | .     | .        |
| .          | . | rs7781350.                        | . | . | .     | .        |
| .          | . | rs7809656.                        | . | . | .     | .        |
| .          | . | rs7491504 ID=COSM4.               | . | . | .     | .        |
| .          | . | Score=119.                        | . | . | .     | .        |
| Score=0.9. | . | .                                 | . | . | .     | .        |
| .          | . | .                                 | . | . | .     | .        |
| .          | . | rs7570296.                        | . | . | .     | .        |
| .          | . | .                                 | . | . | .     | .        |
| .          | . | rs7817135 ID=COSM4.               | . | . | .     | .        |
| .          | . | rs7679025 ID=COSM4.               | . | . | .     | .        |
| .          | . | .                                 | . | . | .     | .        |
| .          | . | .                                 | . | . | .     | .        |
| .          | . | .                                 | . | . | .     | .        |
| .          | . | .                                 | . | . | .     | .        |
| .          | . | rs7574964 ID=COSM4.               | . | . | .     | .        |
| .          | . | ID=COSM4.                         | . | . | .     | .        |
| .          | . | rs5285990 ID=COSN2.               | . | . | .     | 0.002796 |
| .          | . | Score=276.                        | . | . | .     | .        |
| .          | . | ID=COSM4.                         | . | . | .     | .        |
| Score=0.9. | . | .                                 | . | . | .     | .        |
| .          | . | .                                 | . | . | .     | .        |
| .          | . | .                                 | . | . | .     | .        |
| .          | . | rs1380173.                        | . | . | .     | 0.026558 |
| .          | . | ID=COSN1.                         | . | . | .     | .        |
| .          | . | .                                 | . | . | .     | .        |
| .          | . | rs7634794.                        | . | . | .     | .        |
| .          | . | .                                 | . | . | .     | .        |
| .          | . | rs7487058.                        | . | . | .     | .        |
| .          | . | rs1429731 ID=COSN1 Likely benign. | . | . | .     | .        |
| .          | . | rs7500268.                        | . | . | .     | .        |
| .          | . | .                                 | . | . | .     | .        |
| .          | . | .                                 | . | . | .     | .        |
| .          | . | rs7661354.                        | . | . | .     | .        |
| .          | . | .                                 | . | . | .     | .        |
| .          | . | rs5710814.                        | . | . | .     | .        |
| .          | . | Score=235 rs1019291.              | . | . | .     | .        |
| .          | . | rs7630535 ID=COSM4.               | . | . | .     | .        |
| .          | . | Score=346.                        | . | . | .     | .        |
| .          | . | Score=23;l.                       | . | . | .     | .        |
| .          | . | rs7644591 ID=COSM4.               | . | . | .     | .        |
| .          | . | .                                 | . | . | .     | .        |
| .          | . | Score=856.                        | . | . | .     | .        |













|          |          |        |   |   |   |   |   |            |
|----------|----------|--------|---|---|---|---|---|------------|
| 0.0018   | 0.0002   | 0.0001 | . | . | . | . | . | 3.925528,1 |
|          | 3.31E-05 | 0      | . | . | . | . | . | .          |
| 0.0062   | 0.0003   | 0.0003 | . | . | . | . | . | 12.104388  |
|          |          |        | . | . | . | . | . | 0.699566,7 |
|          | 2.54E-05 | 0      | . | . | . | . | . | .          |
|          | 0.0003   | 0.0002 | . | . | . | . | . | .          |
|          | 8.29E-06 | 0      | . | . | . | . | . | .          |
|          | 0.0018   | 0.0003 | . | . | . | . | . | 3.668062,1 |
|          | 0.0013   | 0.0003 | . | . | . | . | . | -0.354890, |
|          |          |        | . | . | . | . | . | -0.012894, |
|          | 3.91E-05 | 0.0005 | . | . | . | . | . | .          |
|          | 8.60E-06 | 0      | . | . | . | . | . | .          |
| 0.0108   | 0.0132   | 0.0002 | . | . | . | . | . | 0.779711,8 |
|          | 8.55E-06 | 0      | . | . | . | . | . | .          |
|          | 0.0014   | 0.0002 | . | . | . | . | . | 2.174337,1 |
|          |          |        | . | . | . | . | . | .          |
|          | 0.0003   | 0      | . | . | . | . | . | .          |
|          | 1.67E-05 | 0      | . | . | . | . | . | .          |
| 8.00E-05 |          |        | . | . | . | . | . | 4.835186,2 |
|          |          |        | . | . | . | . | . | 0.253508,5 |
|          | 0.0027   | 0      | . | . | . | . | . | .          |
|          | 2.51E-05 | 0      | . | . | . | . | . | .          |
|          |          |        | . | . | . | . | . | .          |
|          |          |        | . | . | . | . | . | -0.792134, |
|          |          |        | . | . | . | . | . | 0.066003,4 |
|          | 0.0011   | 0      | . | . | . | . | . | 7.541577,3 |
|          | 0.0002   | 0      | . | . | . | . | . | 0.414848,6 |
|          |          |        | . | . | . | . | . | .          |
|          | 7.45E-05 | 0      | . | . | . | . | . | .          |
|          |          |        | . | . | . | . | . | .          |
|          | 8.41E-06 | 0      | . | . | . | . | . | .          |
|          |          |        | . | . | . | . | . | .          |
|          |          |        | . | . | . | . | . | .          |
|          | 0.0006   | 0.0026 | . | . | . | . | . | -0.337970, |

|          |          |        |  |  |            |
|----------|----------|--------|--|--|------------|
|          | 0.0075   | 0.0013 |  |  | 1.449740,1 |
|          | 0.0042   | 0.0001 |  |  | -0.171168, |
|          | 1.66E-05 | 0      |  |  |            |
|          | 0.0012   | 0      |  |  | 0.332589,5 |
|          |          |        |  |  | -1.012315, |
| 0.0011   | 0.0002   |        |  |  | 3.590050,1 |
|          | 0.0006   | 0      |  |  |            |
|          | 8.28E-06 | 0      |  |  |            |
|          |          |        |  |  | 0.781695,8 |
|          | 0.0003   | 0      |  |  |            |
|          | 8.31E-06 | 0      |  |  |            |
|          | 0.0005   | 0.0004 |  |  |            |
|          |          |        |  |  |            |
| 0.0076   |          |        |  |  | 0.848277,8 |
| 0.0061   | 0.0384   | 0.1569 |  |  | -0.953411, |
|          | 9.89E-05 | 0.001  |  |  | 4.370603,2 |
|          | 4.37E-05 | 0      |  |  | 2.454346,1 |
|          |          |        |  |  | -0.201835, |
|          |          |        |  |  |            |
|          | 1.38E-05 | 0      |  |  |            |
|          |          |        |  |  |            |
|          | 9.35E-05 | 0      |  |  |            |
|          |          |        |  |  |            |
| 8.80E-05 | 0.0002   | 0.0005 |  |  | -0.750302, |
| 0.0086   | 0.0025   | 0.0001 |  |  | 0.948278,8 |
|          | 8.28E-06 |        |  |  |            |
| 0.0043   | 0.0031   | 0.0005 |  |  | 5.924892,3 |
|          | 1.66E-05 | 0.0001 |  |  |            |
|          | 8.28E-06 | 0      |  |  | -0.266141, |
|          | 2.62E-05 | 0      |  |  |            |
|          |          |        |  |  |            |
| 0.005    | 0.0046   | 0.0122 |  |  | 0.334116,5 |
|          |          |        |  |  |            |
|          |          |        |  |  |            |
| 0.0021   |          |        |  |  | 1.247081,1 |
| 0.0175   | 0.0006   | 0.0004 |  |  | 1.443171,1 |
|          |          |        |  |  | 1.184019,9 |







|        |          |        |  |            |
|--------|----------|--------|--|------------|
|        | 4.39E-05 | 0      |  |            |
|        | 0.0002   | 0.0001 |  |            |
|        |          |        |  |            |
|        |          |        |  |            |
| 0.006  | 0.0002   | 0      |  | 6.184515,3 |
| 0.0002 | 0.0004   | 0.0004 |  | 0.091208,4 |
|        |          |        |  |            |
|        |          |        |  |            |
|        |          |        |  |            |
|        | 3.27E-05 | 0      |  |            |
|        |          |        |  |            |
| 0.0106 | 0.0088   | 0.0091 |  | -0.310612, |
|        |          |        |  |            |
| 0.0075 | 0.0002   | 0.0003 |  | 2.258493,1 |
| 0.0064 | 0.0016   | 0.0001 |  | 1.111180,9 |
|        |          |        |  |            |
|        |          |        |  | -0.232107, |
|        | 0.0003   | 0.0002 |  |            |
|        |          |        |  |            |
|        | 0.0015   | 0.0005 |  |            |
|        |          |        |  |            |
|        | 0.0003   | 0.0005 |  |            |
|        | 5.83E-05 | 0      |  |            |
| 0.0252 | 0.0016   | 0.0005 |  | 4.966242,2 |
| 0.0048 | 0.0003   | 0.0001 |  | -1.576300, |
|        |          |        |  |            |
|        | 0.0002   | 0      |  |            |
|        | 0.0003   | 0.0001 |  |            |
|        | 0.0004   | 0.0006 |  | 4.399397,2 |
|        |          |        |  | -0.789274, |
|        |          |        |  |            |
|        |          |        |  | -1.711714, |
|        | 8.36E-06 | 0      |  |            |
|        | 0.0002   | 0.0002 |  |            |
|        | 0.0166   | 0.0104 |  | 0.846469,8 |
|        |          |        |  |            |
|        |          |        |  |            |
|        | 0.0002   | 0.0009 |  | 0.118246,4 |





| NovoDb_V | NovoDb_V | INFO      | FORMAT              | ACa01N     | ACa01T   | Ori_REF | Ori_ALT | shared_hoi |
|----------|----------|-----------|---------------------|------------|----------|---------|---------|------------|
| .        | .        | IC=2;IHP= | DP:DP2:T/24:24:24,2 | 47:47:23,2 | AC       | A       |         | 0          |
| .        | .        | IC=8;IHP= | DP:DP2:T/62:62:54,5 | 114:114:69 | G        | GT      |         | 0          |
| 0.001063 | .        | IC=0;IHP= | DP:DP2:T/74:74:73,7 | 236:236:20 | TTGGAG   | T       |         | 0          |
| .        | .        | IC=1;IHP= | DP:DP2:T/51:51:51,5 | 101:101:69 | GTTT     | G       |         | 0          |
| .        | .        | IC=9;IHP= | DP:DP2:T/77:77:75,7 | 154:154:99 | T        | TC      |         | 0          |
| .        | .        | IC=0;IHP= | DP:DP2:T/96:96:94,9 | 334:334:28 | AT       | A       |         | 0          |
| .        | .        | IC=1;IHP= | DP:DP2:T/93:93:92,9 | 166:166:10 | CAGA     | C       |         | 0          |
| 0.000389 | .        | IC=5;IHP= | DP:DP2:T/145:145:13 | 576:576:23 | T        | TC      |         | 0          |
| .        | .        | IC=1;IHP= | DP:DP2:T/106:106:10 | 234:234:13 | C        | CAG     |         | 0          |
| 0.001392 | .        | IC=6;IHP= | DP:DP2:T/51:51:48,4 | 116:116:89 | T        | TAGAC   |         | 0          |
| .        | .        | IC=0;IHP= | DP:DP2:T/107:107:11 | 245:245:16 | ACACAGCA |         |         | 0          |
| .        | .        | IC=9;IHP= | DP:DP2:T/38:38:31,3 | 72:72:32,3 | G        | GT      |         | 0          |
| 0.011341 | .        | IC=1;IHP= | DP:DP2:T/70:70:64,6 | 176:176:14 | T        | TTGGGC  |         | 0          |
| 0.002806 | .        | IC=0;IHP= | DP:DP2:T/78:78:74,7 | 205:205:19 | GTGTGTG  | G       |         | 0          |
| 0.090962 | 0.147788 | IC=2;IHP= | DP:DP2:T/12:12:12,1 | 29:29:0,0  | TC       | T       |         | 0          |
| .        | .        | IC=0;IHP= | DP:DP2:T/97:97:95,9 | 152:152:13 | GGGGATTG |         |         | 0          |
| .        | .        | IC=2;IHP= | DP:DP2:T/79:79:76,7 | 167:167:11 | CG       | C       |         | 0          |
| .        | .        | IC=0;IHP= | DP:DP2:T/65:65:61,6 | 254:254:19 | CGT      | C       |         | 0          |
| .        | .        | IC=4;IHP= | DP:DP2:T/41:41:41,4 | 83:83:53,5 | GC       | G       |         | 0          |
| .        | .        | IC=0;IHP= | DP:DP2:T/83:83:83,9 | 172:172:19 | CCTCTTT  | C       |         | 0          |
| 0.005265 | .        | IC=1;IHP= | DP:DP2:T/69:69:68,6 | 144:144:12 | C        | CTCTCTC |         | 0          |
| .        | .        | IC=2;IHP= | DP:DP2:T/70:70:69,6 | 177:177:14 | CTG      | C       |         | 0          |
| .        | .        | IC=5;IHP= | DP:DP2:T/118:118:11 | 220:220:16 | AC       | A       |         | 0          |
| .        | .        | IC=7;IHP= | DP:DP2:T/152:152:14 | 304:304:24 | TC       | T       |         | 0          |
| .        | .        | IC=4;IHP= | DP:DP2:T/67:67:68,6 | 194:194:13 | AC       | A       |         | 0          |
| .        | .        | IC=8;IHP= | DP:DP2:T/103:103:10 | 193:193:19 | T        | TG      |         | 0          |
| .        | .        | IC=5;IHP= | DP:DP2:T/42:42:42,4 | 77:77:56,5 | AC       | A       |         | 0          |
| .        | .        | IC=5;IHP= | DP:DP2:T/89:89:82,8 | 173:173:12 | CG       | C       |         | 0          |
| .        | .        | IC=6;IHP= | DP:DP2:T/86:86:83,8 | 209:209:16 | TG       | T       |         | 0          |
| .        | .        | IC=0;IHP= | DP:DP2:T/165:165:16 | 317:317:26 | CA       | C       |         | 0          |
| .        | .        | IC=8;IHP= | DP:DP2:T/105:105:99 | 191:191:16 | A        | AC      |         | 0          |
| .        | .        | IC=7;IHP= | DP:DP2:T/50:50:50,5 | 85:85:64,6 | C        | CT      |         | 0          |
| .        | .        | IC=7;IHP= | DP:DP2:T/24:24:24,2 | 53:53:35,3 | GA       | G       |         | 0          |
| .        | .        | IC=8;IHP= | DP:DP2:T/108:108:10 | 203:203:19 | T        | TG      |         | 0          |
| .        | .        | IC=4;IHP= | DP:DP2:T/56:56:56,5 | 84:84:56,5 | CT       | C       |         | 0          |
| .        | .        | IC=6;IHP= | DP:DP2:T/90:90:88,8 | 153:153:11 | GT       | G       |         | 0          |
| .        | .        | IC=4;IHP= | DP:DP2:T/60:60:60,6 | 137:137:10 | AG       | A       |         | 0          |
| .        | .        | IC=5;IHP= | DP:DP2:T/51:51:49,4 | 68:68:52,5 | TG       | T       |         | 0          |
| .        | .        | IC=6;IHP= | DP:DP2:T/94:94:91,9 | 237:237:19 | GT       | G       |         | 0          |
| .        | .        | IC=4;IHP= | DP:DP2:T/93:93:92,9 | 198:198:19 | TA       | T       |         | 0          |
| .        | .        | IC=7;IHP= | DP:DP2:T/63:63:57,5 | 106:106:79 | GA       | G       |         | 0          |
| .        | .        | IC=2;IHP= | DP:DP2:T/58:58:59,5 | 108:108:84 | CAG      | C       |         | 0          |
| .        | .        | IC=4;IHP= | DP:DP2:T/71:71:68,6 | 114:114:87 | TC       | T       |         | 0          |
| .        | .        | IC=9;IHP= | DP:DP2:T/59:59:59,5 | 97:97:72,7 | G        | GA      |         | 0          |
| .        | .        | IC=6;IHP= | DP:DP2:T/56:56:52,5 | 105:105:82 | GA       | G       |         | 0          |
| .        | .        | IC=7;IHP= | DP:DP2:T/52:52:51,5 | 92:92:65,6 | AT       | A       |         | 0          |
| .        | .        | IC=5;IHP= | DP:DP2:T/217:217:21 | 458:458:36 | AC       | A       |         | 0          |
| .        | .        | IC=7;IHP= | DP:DP2:T/73:73:70,7 | 133:133:10 | TA       | T       |         | 0          |
| .        | .        | IC=7;IHP= | DP:DP2:T/59:59:55,5 | 86:86:61,6 | TA       | T       |         | 0          |
| .        | .        | IC=5;IHP= | DP:DP2:T/52:52:48,5 | 79:79:57,5 | CG       | C       |         | 0          |
| .        | 0.000883 | IC=5;IHP= | DP:DP2:T/31:31:32,3 | 73:73:49,4 | CTG      | C       |         | 0          |

|          |          |                                                 |    |   |
|----------|----------|-------------------------------------------------|----|---|
|          |          | IC=8;IHP= DP:DP2:T/50:50:49,4 79:79:62,6 C      | CA | 0 |
|          |          | IC=6;IHP= DP:DP2:T/72:72:68,6 114:114:87AT      | A  | 0 |
|          |          | IC=3;IHP= DP:DP2:T/41:41:41,4 54:54:34,3 TA     | T  | 0 |
| 0.001131 | 0.001416 | IC=7;IHP= DP:DP2:T/52:52:49,4 85:85:61,6 CA     | C  | 0 |
|          |          | IC=4;IHP= DP:DP2:T/25:25:25,2 48:48:30,3 GA     | G  | 0 |
|          |          | IC=9;IHP= DP:DP2:T/40:40:38,3 61:61:43,4 A      | AT | 0 |
|          |          | IC=9;IHP= DP:DP2:T/131:131:12 324:324:24 G      | GC | 0 |
|          |          | IC=7;IHP= DP:DP2:T/71:71:67,6 101:101:77 G      | GT | 0 |
|          |          | IC=7;IHP= DP:DP2:T/47:47:47,4 73:73:50,5 TA     | T  | 0 |
|          |          | IC=5;IHP= DP:DP2:T/55:55:53,5 108:108:82 CG     | C  | 0 |
|          |          | IC=7;IHP= DP:DP2:T/103:103:98 125:125:70 TA     | T  | 0 |
|          |          | IC=4;IHP= DP:DP2:T/97:97:95,9 182:182:14 AG     | A  | 0 |
|          |          | IC=7;IHP= DP:DP2:T/109:109:10 187:187:14 A      | AT | 0 |
| 0.000194 |          | IC=8;IHP= DP:DP2:T/70:70:64,6 136:136:10 T      | TG | 0 |
|          |          | IC=5;IHP= DP:DP2:T/66:66:63,6 110:110:80 CT     | C  | 0 |
|          |          | IC=7;IHP= DP:DP2:T/58:58:55,5 108:108:85 AT     | A  | 0 |
|          |          | IC=7;IHP= DP:DP2:T/86:86:86,8 131:131:10 CT     | C  | 0 |
|          |          | IC=4;IHP= DP:DP2:T/73:73:71,7 145:145:11 AT     | A  | 0 |
|          |          | IC=6;IHP= DP:DP2:T/51:51:49,4 104:104:70 A      | AT | 0 |
|          |          | IC=6;IHP= DP:DP2:T/72:72:67,6 105:105:70 CA     | C  | 0 |
|          |          | IC=9;IHP= DP:DP2:T/59:59:59,5 118:118:88 T      | TA | 0 |
|          |          | IC=6;IHP= DP:DP2:T/62:62:60,6 111:111:81 AC     | A  | 0 |
|          |          | IC=0;IHP= DP:DP2:T/106:106:10 152:152:10 AG     | A  | 0 |
|          |          | IC=4;IHP= DP:DP2:T/96:96:92,9 137:137:10 GA     | G  | 0 |
|          |          | IC=3;IHP= DP:DP2:T/67:67:67,6 140:140:11 TA     | T  | 0 |
|          |          | IC=4;IHP= DP:DP2:T/136:136:10 304:304:20 TG     | T  | 0 |
|          |          | IC=8;IHP= DP:DP2:T/181:181:17 310:310:20 A      | AC | 0 |
|          |          | IC=6;IHP= DP:DP2:T/119:119:11 176:176:14 CT     | C  | 0 |
|          |          | IC=5;IHP= DP:DP2:T/71:71:66,6 120:120:98 AT     | A  | 0 |
|          |          | IC=7;IHP= DP:DP2:T/39:39:35,3 96:96:65,6 C      | CT | 0 |
|          |          | IC=7;IHP= DP:DP2:T/49:49:44,4 66:66:51,5 TA     | T  | 0 |
|          |          | IC=6;IHP= DP:DP2:T/101:101:97 131:131:10 GAA    | G  | 0 |
|          |          | IC=1;IHP= DP:DP2:T/102:102:10 225:225:10 TGAG   | T  | 0 |
|          |          | IC=8;IHP= DP:DP2:T/90:90:88,8 174:174:10 A      | AG | 0 |
|          |          | IC=3;IHP= DP:DP2:T/79:79:77,7 122:122:97 CA     | C  | 0 |
|          |          | IC=6;IHP= DP:DP2:T/251:251:24 394:394:30 CG     | C  | 0 |
|          |          | IC=6;IHP= DP:DP2:T/79:79:75,7 158:158:10 CT     | C  | 0 |
|          |          | IC=0;IHP= DP:DP2:T/35:35:35,3 78:78:52,5 AAG    | A  | 0 |
|          |          | IC=7;IHP= DP:DP2:T/122:122:11 214:214:17 T      | TG | 0 |
|          |          | IC=5;IHP= DP:DP2:T/68:68:68,6 81:81:64,6 GA     | G  | 0 |
|          |          | IC=5;IHP= DP:DP2:T/58:58:57,5 125:125:97 T      | TC | 0 |
| 0.045347 |          | IC=0;IHP= DP:DP2:T/38:38:37,3 92:92:70,7 CTTCT  | C  | 0 |
|          |          | IC=9;IHP= DP:DP2:T/68:68:63,6 98:98:76,7 A      | AT | 0 |
|          |          | IC=6;IHP= DP:DP2:T/183:183:17 449:449:30 TG     | T  | 0 |
|          |          | IC=6;IHP= DP:DP2:T/105:105:10 177:177:10 G      | GC | 0 |
|          |          | IC=0;IHP= DP:DP2:T/91:91:91,9 227:227:10 TTAAC  | T  | 0 |
| 0.000518 | 0.00088  | IC=2;IHP= DP:DP2:T/166:166:17 280:280:21 GAGA   | G  | 0 |
|          |          | IC=6;IHP= DP:DP2:T/79:79:79,7 157:157:10 AT     | A  | 0 |
|          |          | IC=5;IHP= DP:DP2:T/77:77:69,7 125:125:90 GA     | G  | 0 |
|          |          | IC=1;IHP= DP:DP2:T/148:148:14 282:282:20 AAGG   | A  | 0 |
|          |          | IC=2;IHP= DP:DP2:T/65:65:69,6 141:141:10 AAAAAG | A  | 0 |
|          |          | IC=4;IHP= DP:DP2:T/207:207:20 405:405:30 TC     | T  | 0 |
|          |          | IC=9;IHP= DP:DP2:T/46:46:44,4 67:67:46,4 C      | CT | 0 |
|          |          | IC=6;IHP= DP:DP2:T/55:55:52,5 104:104:70 CG     | C  | 0 |

|          |          |                                              |      |   |
|----------|----------|----------------------------------------------|------|---|
| .        | .        | IC=8;IHP= DP:DP2:T/52:52:51,5 85:85:67,6 C   | CA   | 0 |
| .        | .        | IC=9;IHP= DP:DP2:T/84:84:75,7 113:113:88 C   | CT   | 0 |
| .        | .        | IC=1;IHP= DP:DP2:T/67:67:69,6 137:137:111 TC | T    | 0 |
| .        | .        | IC=8;IHP= DP:DP2:T/54:54:46,4 122:122:88 A   | AT   | 0 |
| .        | .        | IC=8;IHP= DP:DP2:T/177:177:173 348:348:28 C  | CA   | 0 |
| .        | .        | IC=4;IHP= DP:DP2:T/183:183:183 351:351:28 AG | A    | 0 |
| .        | .        | IC=6;IHP= DP:DP2:T/52:52:49,4 137:137:98 AC  | A    | 0 |
| .        | .        | IC=9;IHP= DP:DP2:T/80:80:77,7 133:133:10 C   | CA   | 0 |
| .        | .        | IC=5;IHP= DP:DP2:T/35:35:36,3 66:66:51,5 GA  | G    | 0 |
| .        | .        | IC=7;IHP= DP:DP2:T/54:54:43,4 91:91:61,6 GA  | G    | 0 |
| .        | .        | IC=7;IHP= DP:DP2:T/84:84:81,8 131:131:10 CT  | C    | 0 |
| .        | .        | IC=8;IHP= DP:DP2:T/91:91:88,8 174:174:18 T   | TG   | 0 |
| .        | .        | IC=8;IHP= DP:DP2:T/37:37:32,3 87:87:60,6 G   | GA   | 0 |
| 0.000195 | .        | IC=2;IHP= DP:DP2:T/77:77:73,7 134:134:10 ACT | A    | 0 |
| .        | .        | IC=4;IHP= DP:DP2:T/77:77:76,7 140:140:10 GT  | G    | 0 |
| .        | .        | IC=9;IHP= DP:DP2:T/176:176:18 391:391:28 G   | GC   | 0 |
| .        | .        | IC=4;IHP= DP:DP2:T/117:117:111 188:188:18 AG | A    | 0 |
| .        | .        | IC=6;IHP= DP:DP2:T/39:39:38,3 108:108:78 CG  | C    | 0 |
| 0.001761 | 0.005587 | IC=7;IHP= DP:DP2:T/40:40:37,3 91:91:69,6 CT  | C    | 0 |
| .        | .        | IC=4;IHP= DP:DP2:T/62:62:61,6 86:86:61,6 TG  | T    | 0 |
| .        | .        | IC=7;IHP= DP:DP2:T/90:90:86,8 133:133:10 CT  | C    | 0 |
| .        | .        | IC=5;IHP= DP:DP2:T/162:162:18 396:396:31 TC  | T    | 0 |
| .        | .        | IC=7;IHP= DP:DP2:T/122:122:11 204:204:14 CG  | C    | 0 |
| .        | .        | IC=8;IHP= DP:DP2:T/43:43:40,4 122:122:98 G   | GA   | 0 |
| .        | .        | IC=7;IHP= DP:DP2:T/70:70:59,5 106:106:68 AC  | A    | 0 |
| .        | .        | IC=4;IHP= DP:DP2:T/133:133:18 274:274:21 GC  | G    | 0 |
| .        | .        | IC=7;IHP= DP:DP2:T/31:31:31,3 58:58:33,3 GA  | G    | 0 |
| .        | .        | IC=7;IHP= DP:DP2:T/62:62:57,5 106:106:78 GA  | G    | 0 |
| .        | .        | IC=9;IHP= DP:DP2:T/59:59:58,5 108:108:84 C   | CA   | 0 |
| .        | .        | IC=7;IHP= DP:DP2:T/77:77:74,7 151:151:78 CA  | C    | 0 |
| .        | .        | IC=6;IHP= DP:DP2:T/131:131:12 243:243:18 TC  | T    | 0 |
| .        | .        | IC=7;IHP= DP:DP2:T/56:56:51,5 89:89:62,6 A   | AG   | 0 |
| .        | .        | IC=9;IHP= DP:DP2:T/109:109:10 179:179:18 G   | GT   | 0 |
| 0.028386 | 0.003559 | IC=7;IHP= DP:DP2:T/62:62:63,6 107:107:88 ATG | A    | 0 |
| .        | .        | IC=6;IHP= DP:DP2:T/37:37:37,3 59:59:43,4 AT  | A    | 0 |
| .        | .        | IC=7;IHP= DP:DP2:T/52:52:50,5 55:55:35,3 CT  | C    | 0 |
| .        | .        | IC=9;IHP= DP:DP2:T/50:50:49,4 82:82:66,6 C   | CA   | 0 |
| .        | .        | IC=1;IHP= DP:DP2:T/61:61:59,5 87:87:62,6 TAG | T    | 0 |
| .        | .        | IC=7;IHP= DP:DP2:T/69:69:69,6 146:146:10 A   | AT   | 0 |
| 0.010551 | 0.00354  | IC=6;IHP= DP:DP2:T/29:29:24,2 59:59:28,3 T   | TGCC | 0 |
| .        | .        | IC=9;IHP= DP:DP2:T/42:42:38,3 90:90:63,6 T   | TG   | 0 |
| .        | .        | IC=3;IHP= DP:DP2:T/88:88:86,8 145:145:10 TC  | T    | 0 |
| .        | .        | IC=8;IHP= DP:DP2:T/31:31:30,3 77:77:53,5 C   | CG   | 0 |
| .        | .        | IC=7;IHP= DP:DP2:T/47:47:43,4 65:65:46,4 GA  | G    | 0 |
| .        | .        | IC=7;IHP= DP:DP2:T/61:61:59,5 129:129:98 A   | AG   | 0 |
| .        | .        | IC=7;IHP= DP:DP2:T/103:103:97 202:202:18 GA  | G    | 0 |
| .        | .        | IC=4;IHP= DP:DP2:T/144:144:18 244:244:18 AC  | A    | 0 |
| .        | .        | IC=6;IHP= DP:DP2:T/107:107:98 222:222:17 T   | TC   | 0 |
| .        | .        | IC=6;IHP= DP:DP2:T/90:90:87,8 172:172:18 TA  | T    | 0 |
| .        | .        | IC=8;IHP= DP:DP2:T/111:111:10 261:261:20 C   | CA   | 0 |
| .        | .        | IC=6;IHP= DP:DP2:T/100:100:10 182:182:18 TG  | T    | 0 |
| .        | .        | IC=4;IHP= DP:DP2:T/91:91:89,8 161:161:11 GA  | G    | 0 |
| .        | .        | IC=3;IHP= DP:DP2:T/117:117:11 271:271:18 TG  | T    | 0 |
| 0.002138 | 0.001767 | IC=6;IHP= DP:DP2:T/103:103:92 214:214:18 CG  | C    | 0 |

|          |          |                                                     |   |
|----------|----------|-----------------------------------------------------|---|
| .        | .        | IC=1;IHP= DP:DP2:T/ 123:123:12 256:256:22 GCCAGCC G | 0 |
| 0.000278 | .        | IC=7;IHP= DP:DP2:T/ 42:42:38,3 65:65:40,4 A AGAG    | 0 |
| .        | .        | IC=7;IHP= DP:DP2:T/ 77:77:77,7 156:156:12 TA T      | 0 |
| .        | .        | IC=6;IHP= DP:DP2:T/ 80:80:76,7 137:137:11 G GC      | 0 |
| .        | .        | IC=7;IHP= DP:DP2:T/ 75:75:67,6 153:153:12 CT C      | 0 |
| .        | .        | IC=5;IHP= DP:DP2:T/ 92:92:86,9 203:203:15 A AAAC    | 0 |
| 0.001942 | .        | IC=7;IHP= DP:DP2:T/ 75:75:71,7 137:137:11 GA G      | 0 |
| .        | .        | IC=7;IHP= DP:DP2:T/ 154:154:14 336:336:27 G GC      | 0 |
| .        | .        | IC=1;IHP= DP:DP2:T/ 23:23:21,2 48:48:26,2 CG C      | 0 |
| .        | .        | IC=9;IHP= DP:DP2:T/ 111:111:10 187:187:13 C CT      | 0 |
| .        | .        | IC=6;IHP= DP:DP2:T/ 90:90:89,9 209:209:17 CA C      | 0 |
| .        | .        | IC=4;IHP= DP:DP2:T/ 68:68:64,6 130:130:9 AT A       | 0 |
| .        | .        | IC=7;IHP= DP:DP2:T/ 35:35:30,3 54:54:37,3 CT C      | 0 |
| .        | .        | IC=7;IHP= DP:DP2:T/ 86:86:85,8 162:162:12 TA T      | 0 |
| .        | .        | IC=6;IHP= DP:DP2:T/ 37:37:34,3 83:83:60,6 CT C      | 0 |
| 0.000194 | 0.003565 | IC=6;IHP= DP:DP2:T/ 91:91:86,8 164:164:11 TAC T     | 0 |
| .        | .        | IC=7;IHP= DP:DP2:T/ 150:150:14 221:221:16 T TC      | 0 |
| .        | .        | IC=8;IHP= DP:DP2:T/ 116:116:11 236:236:15 A AC      | 0 |
| .        | .        | IC=6;IHP= DP:DP2:T/ 66:66:63,6 122:122:7 GA G       | 0 |
| .        | .        | IC=7;IHP= DP:DP2:T/ 94:94:88,8 225:225:16 CA C      | 0 |
| .        | .        | IC=5;IHP= DP:DP2:T/ 104:104:97 223:223:17 CG C      | 0 |
| .        | .        | IC=7;IHP= DP:DP2:T/ 50:50:43,4 80:80:55,5 AT A      | 0 |
| .        | .        | IC=9;IHP= DP:DP2:T/ 49:49:48,4 98:98:76,7 G GA      | 0 |
| .        | .        | IC=6;IHP= DP:DP2:T/ 72:72:65,6 155:155:11 TG T      | 0 |
| .        | .        | IC=7;IHP= DP:DP2:T/ 132:132:12 304:304:22 CT C      | 0 |
| 0.000197 | .        | IC=9;IHP= DP:DP2:T/ 61:61:55,5 87:87:59,6 C CA      | 0 |
| 0.000705 | .        | IC=7;IHP= DP:DP2:T/ 75:75:68,6 193:193:15 AT A      | 0 |
| .        | .        | IC=1;IHP= DP:DP2:T/ 67:67:70,7 72:72:61,6 CCTT C    | 0 |
| .        | .        | IC=3;IHP= DP:DP2:T/ 227:227:22 425:425:35 CT C      | 0 |
| 0.005479 | 0.012433 | IC=5;IHP= DP:DP2:T/ 71:71:71,7 123:123:9 AC A       | 0 |
| .        | .        | IC=5;IHP= DP:DP2:T/ 47:47:47,4 98:98:75,7 TG T      | 0 |
| .        | .        | IC=4;IHP= DP:DP2:T/ 101:101:99 170:170:12 TG T      | 0 |
| .        | .        | IC=7;IHP= DP:DP2:T/ 99:99:95,9 183:183:13 G GC      | 0 |
| 0.000389 | .        | IC=8;IHP= DP:DP2:T/ 91:91:86,8 125:125:8 A AC       | 0 |
| .        | .        | IC=5;IHP= DP:DP2:T/ 90:90:88,8 197:197:14 AC A      | 0 |
| .        | .        | IC=5;IHP= DP:DP2:T/ 40:40:40,4 77:77:58,5 A AG      | 0 |
| .        | .        | IC=7;IHP= DP:DP2:T/ 41:41:39,3 90:90:62,6 AT A      | 0 |
| .        | .        | IC=6;IHP= DP:DP2:T/ 87:87:83,8 154:154:12 CA C      | 0 |
| 0.001391 | .        | IC=6;IHP= DP:DP2:T/ 77:77:71,7 120:120:91 TA T      | 0 |
| 0.001206 | .        | IC=9;IHP= DP:DP2:T/ 49:49:46,4 73:73:52,5 T TA      | 0 |
| .        | .        | IC=9;IHP= DP:DP2:T/ 95:95:81,8 176:176:13 G GT      | 0 |
| .        | .        | IC=7;IHP= DP:DP2:T/ 270:270:25 556:556:42 C CG      | 0 |
| .        | .        | IC=9;IHP= DP:DP2:T/ 64:64:61,6 164:164:11 T TC      | 0 |
| .        | .        | IC=6;IHP= DP:DP2:T/ 93:93:93,9 139:139:10 CT C      | 0 |
| 0.000389 | .        | IC=0;IHP= DP:DP2:T/ 85:85:81,8 178:178:15 GACAA G   | 0 |
| .        | .        | IC=3;IHP= DP:DP2:T/ 115:115:11 308:308:24 GGAA G    | 0 |
| .        | .        | IC=6;IHP= DP:DP2:T/ 73:73:71,7 123:123:9 AT A       | 0 |
| .        | .        | IC=6;IHP= DP:DP2:T/ 82:82:81,8 131:131:10 CA C      | 0 |
| 0.00529  | 0.002833 | IC=9;IHP= DP:DP2:T/ 49:49:43,4 80:80:57,5 G GC      | 0 |
| .        | .        | IC=7;IHP= DP:DP2:T/ 75:75:75,7 165:165:12 GT G      | 0 |
| .        | .        | IC=5;IHP= DP:DP2:T/ 41:41:39,6 80:80:55,6 T TG      | 0 |
| .        | .        | IC=6;IHP= DP:DP2:T/ 159:159:15 362:362:27 TG T      | 0 |
| .        | .        | IC=7;IHP= DP:DP2:T/ 75:75:74,7 181:181:14 AC A      | 0 |
| .        | .        | IC=7;IHP= DP:DP2:T/ 48:48:45,4 80:80:60,6 CA C      | 0 |



|          |          |                                                |     |   |
|----------|----------|------------------------------------------------|-----|---|
| .        | .        | IC=4;IHP= DP:DP2:T/95:95:95,9 176:176:1 GC     | G   | 0 |
| .        | .        | IC=1;IHP= DP:DP2:T/64:64:64,6 124:124:1 CCCTT  | C   | 0 |
| 0.000777 | .        | IC=7;IHP= DP:DP2:T/93:93:86,8 204:204:1 T      | TTG | 0 |
| 0.000229 | .        | IC=9;IHP= DP:DP2:T/46:46:40,4 51:51:32,3 C     | CA  | 0 |
| .        | .        | IC=7;IHP= DP:DP2:T/62:62:60,6 88:88:69,6 CA    | C   | 0 |
| .        | .        | IC=6;IHP= DP:DP2:T/57:57:56,5 120:120:8 AG     | A   | 0 |
| .        | .        | IC=4;IHP= DP:DP2:T/95:95:93,9 189:189:1 AG     | A   | 0 |
| .        | 0.00088  | IC=7;IHP= DP:DP2:T/125:125:112 14:214:1 GA     | G   | 0 |
| .        | .        | IC=5;IHP= DP:DP2:T/101:101:9 206:206:1 GC      | G   | 0 |
| .        | .        | IC=7;IHP= DP:DP2:T/52:52:51,5 77:77:54,5 GA    | G   | 0 |
| .        | .        | IC=7;IHP= DP:DP2:T/119:119:1 230:230:17 AC     | A   | 0 |
| .        | .        | IC=0;IHP= DP:DP2:T/116:116:11 228:228:1 AC     | A   | 0 |
| .        | .        | IC=5;IHP= DP:DP2:T/96:96:90,9 130:130:9 AT     | A   | 0 |
| 0.00136  | .        | IC=5;IHP= DP:DP2:T/59:59:59,6 114:114:9 AT     | A   | 0 |
| .        | .        | IC=1;IHP= DP:DP2:T/70:70:69,7 116:116:9 AAAGT  | A   | 0 |
| .        | .        | IC=7;IHP= DP:DP2:T/98:98:93,9 156:156:11 CT    | C   | 0 |
| .        | .        | IC=9;IHP= DP:DP2:T/47:47:46,4 97:97:74,7 C     | CT  | 0 |
| .        | .        | IC=7;IHP= DP:DP2:T/59:59:54,5 101:101:7 CT     | C   | 0 |
| .        | .        | IC=5;IHP= DP:DP2:T/84:84:81,8 187:187:14 TC    | T   | 0 |
| .        | .        | IC=5;IHP= DP:DP2:T/56:56:55,5 112:112:8 GA     | G   | 0 |
| .        | .        | IC=5;IHP= DP:DP2:T/80:80:78,7 129:129:9 A      | AAG | 0 |
| .        | .        | IC=1;IHP= DP:DP2:T/53:53:54,5 110:110:8 GTTC   | G   | 0 |
| .        | .        | IC=7;IHP= DP:DP2:T/54:54:51,5 107:107:7 AT     | A   | 0 |
| .        | .        | IC=1;IHP= DP:DP2:T/64:64:66,6 64:64:47,4 TCTC  | T   | 0 |
| .        | .        | IC=3;IHP= DP:DP2:T/916:916:9 1551:1551 TG      | T   | 0 |
| .        | .        | IC=5;IHP= DP:DP2:T/194:194:1 363:363:27 T      | TC  | 0 |
| .        | .        | IC=7;IHP= DP:DP2:T/85:85:81,8 203:203:1 CA     | C   | 0 |
| .        | .        | IC=4;IHP= DP:DP2:T/120:120:11 237:237:1 TC     | T   | 0 |
| 0.010408 | 0.006184 | IC=6;IHP= DP:DP2:T/28:28:26,2 51:51:29,3 GTA   | G   | 0 |
| .        | .        | IC=5;IHP= DP:DP2:T/180:180:17 314:314:2 GC     | G   | 0 |
| .        | .        | IC=6;IHP= DP:DP2:T/124:124:11 245:245:1 TG     | T   | 0 |
| .        | .        | IC=6;IHP= DP:DP2:T/83:83:84,8 167:167:1 AT     | A   | 0 |
| .        | .        | IC=5;IHP= DP:DP2:T/78:78:76,7 164:164:11 CA    | C   | 0 |
| .        | .        | IC=7;IHP= DP:DP2:T/135:135:12 259:259:1 CT     | C   | 0 |
| .        | .        | IC=9;IHP= DP:DP2:T/56:56:52,5 105:105:81 T     | TG  | 0 |
| .        | .        | IC=7;IHP= DP:DP2:T/113:113:11 269:269:2 TG     | T   | 0 |
| 0.006646 | 0.00499  | IC=5;IHP= DP:DP2:T/107:107:97 175:175:12 GT    | G   | 0 |
| .        | .        | IC=0;IHP= DP:DP2:T/41:41:38,3 66:66:50,5 TAAAG | T   | 0 |
| .        | .        | IC=7;IHP= DP:DP2:T/68:68:67,6 130:130:9 C      | CT  | 0 |
| .        | .        | IC=7;IHP= DP:DP2:T/119:119:1 243:243:1 GC      | G   | 0 |
| .        | .        | IC=5;IHP= DP:DP2:T/55:55:54,5 72:72:50,5 A     | AG  | 0 |
| .        | .        | IC=7;IHP= DP:DP2:T/47:47:46,4 77:77:53,5 TG    | T   | 0 |
| .        | .        | IC=8;IHP= DP:DP2:T/129:129:12 239:239:1 G      | GA  | 0 |
| .        | .        | IC=6;IHP= DP:DP2:T/81:81:77,7 142:142:1 GA     | G   | 0 |
| 0.00312  | 0.001767 | IC=6;IHP= DP:DP2:T/61:61:60,6 114:114:8 CT     | C   | 0 |
| .        | .        | IC=5;IHP= DP:DP2:T/43:43:42,4 74:74:55,5 TA    | T   | 0 |
| .        | .        | IC=5;IHP= DP:DP2:T/115:115:11 241:241:1 CT     | C   | 0 |
| .        | .        | IC=7;IHP= DP:DP2:T/74:74:71,7 97:97:70,7 AT    | A   | 0 |
| .        | .        | IC=4;IHP= DP:DP2:T/77:77:77,7 182:182:1 AC     | A   | 0 |
| .        | .        | IC=7;IHP= DP:DP2:T/51:51:50,5 118:118:8 CT     | C   | 0 |
| .        | .        | IC=6;IHP= DP:DP2:T/33:33:31,3 52:52:36,3 CT    | C   | 0 |
| .        | .        | IC=7;IHP= DP:DP2:T/40:40:37,3 110:110:8 CA     | C   | 0 |
| .        | .        | IC=6;IHP= DP:DP2:T/67:67:66,6 133:133:1 CT     | C   | 0 |
| .        | .        | IC=1;IHP= DP:DP2:T/72:72:73,7 129:129:1 CTG    | C   | 0 |

|          |          |                                                    |      |   |
|----------|----------|----------------------------------------------------|------|---|
|          |          | IC=7;IHP= DP:DP2:T/74:74:70,7 176:176:13 GT        | G    | 0 |
|          |          | IC=8;IHP= DP:DP2:T/75:75:74,7 149:149:11 T         | TA   | 0 |
|          |          | IC=9;IHP= DP:DP2:T/56:56:54,5 144:144:10 C         | CT   | 0 |
|          |          | IC=4;IHP= DP:DP2:T/144:144:14278:278:21 GC         | G    | 0 |
|          |          | IC=5;IHP= DP:DP2:T/85:85:84,8 178:178:14 TG        | T    | 0 |
|          |          | IC=7;IHP= DP:DP2:T/82:82:81,8 156:156:11 CA        | C    | 0 |
|          |          | IC=4;IHP= DP:DP2:T/74:74:74,7 126:126:10 GA        | G    | 0 |
|          |          | IC=5;IHP= DP:DP2:T/99:99:97,9 198:198:15 AC        | A    | 0 |
|          |          | IC=4;IHP= DP:DP2:T/66:66:65,6 176:176:13 GC        | G    | 0 |
|          |          | IC=9;IHP= DP:DP2:T/119:119:11300:300:22 G          | GA   | 0 |
|          |          | IC=6;IHP= DP:DP2:T/80:80:74,7 156:156:12 GC        | G    | 0 |
|          |          | IC=9;IHP= DP:DP2:T/114:114:10 192:192:11 G         | GC   | 0 |
|          |          | IC=7;IHP= DP:DP2:T/69:69:68,6 115:115:91 CT        | C    | 0 |
|          |          | IC=9;IHP= DP:DP2:T/78:78:78,7 154:154:12 G         | GT   | 0 |
|          |          | IC=5;IHP= DP:DP2:T/93:93:88,8 212:212:15 AC        | A    | 0 |
| 0.000224 |          | IC=8;IHP= DP:DP2:T/56:56:47,4 107:107:75 T         | TGA  | 0 |
|          |          | IC=7;IHP= DP:DP2:T/55:55:53,5 105:105:80 GT        | G    | 0 |
|          |          | IC=8;IHP= DP:DP2:T/168:168:16416:416:33 G          | GC   | 0 |
|          |          | IC=6;IHP= DP:DP2:T/139:139:13 233:233:19 CG        | C    | 0 |
|          |          | IC=1;IHP= DP:DP2:T/83:83:83,8 134:134:10 ACT       | A    | 0 |
|          |          | IC=7;IHP= DP:DP2:T/139:139:12 250:250:19 T         | TC   | 0 |
|          |          | IC=6;IHP= DP:DP2:T/44:44:40,4 57:57:34,3 TA        | T    | 0 |
|          |          | IC=5;IHP= DP:DP2:T/92:92:91,9 181:181:14 TG        | T    | 0 |
|          |          | IC=6;IHP= DP:DP2:T/57:57:54,5 109:109:79 TG        | T    | 0 |
| 0.000389 | 0.002427 | IC=5;IHP= DP:DP2:T/129:129:12 215:215:16 AC        | A    | 0 |
|          |          | IC=2;IHP= DP:DP2:T/107:107:10 195:195:15 GCTT      | G    | 0 |
|          |          | IC=7;IHP= DP:DP2:T/26:26:27,2 45:45:29,3 TA        | T    | 0 |
|          |          | IC=1;IHP= DP:DP2:T/45:45:44,4 95:95:71,7 ATC       | A    | 0 |
|          |          | IC=6;IHP= DP:DP2:T/109:109:99 276:276:21 TG        | T    | 0 |
|          |          | IC=6;IHP= DP:DP2:T/77:77:76,7 121:121:93 GA        | G    | 0 |
|          |          | IC=4;IHP= DP:DP2:T/111:111:10 213:213:15 TC        | T    | 0 |
|          |          | IC=4;IHP= DP:DP2:T/99:99:96,9 229:229:18 CT        | C    | 0 |
|          |          | IC=0;IHP= DP:DP2:T/100:100:10 166:166:13 CCA       | C    | 0 |
| 0.000469 |          | IC=8;IHP= DP:DP2:T/82:82:67,6 149:149:95 T         | TGGA | 0 |
|          | 0.00088  | IC=5;IHP= DP:DP2:T/79:79:78,7 158:158:12 AC        | A    | 0 |
|          |          | IC=5;IHP= DP:DP2:T/53:53:54,5 99:99:79,7 CG        | C    | 0 |
|          |          | IC=5;IHP= DP:DP2:T/61:61:55,5 145:145:10 AT        | A    | 0 |
|          |          | IC=4;IHP= DP:DP2:T/71:71:69,7 108:108:83 GC        | G    | 0 |
|          |          | IC=1;IHP= DP:DP2:T/160:160:15 296:296:23 ATGGAAT A | A    | 0 |
|          | 0.000885 | IC=6;IHP= DP:DP2:T/176:176:17 456:456:35 GC        | G    | 0 |
|          |          | IC=7;IHP= DP:DP2:T/31:31:31,3 47:47:32,3 AT        | A    | 0 |
|          |          | IC=5;IHP= DP:DP2:T/48:48:49,4 87:87:61,6 TC        | T    | 0 |
|          |          | IC=4;IHP= DP:DP2:T/144:144:14272:272:21 GT         | G    | 0 |
|          |          | IC=7;IHP= DP:DP2:T/71:71:68,6 167:167:12 C         | CA   | 0 |
|          |          | IC=7;IHP= DP:DP2:T/33:33:32,3 58:58:37,3 CT        | C    | 0 |
|          |          | IC=4;IHP= DP:DP2:T/45:45:44,4 54:54:33,3 GA        | G    | 0 |
|          |          | IC=8;IHP= DP:DP2:T/114:114:11 197:197:14 G         | GC   | 0 |
|          |          | IC=2;IHP= DP:DP2:T/78:78:75,7 143:143:11 CCCT      | C    | 0 |
|          |          | IC=1;IHP= DP:DP2:T/187:187:18 337:337:25 T         | TC   | 0 |
|          |          | IC=6;IHP= DP:DP2:T/90:90:89,8 197:197:14 GA        | G    | 0 |
|          |          | IC=6;IHP= DP:DP2:T/79:79:78,8 193:193:15 GC        | G    | 0 |
|          |          | IC=5;IHP= DP:DP2:T/55:55:52,5 131:131:95 CG        | C    | 0 |
| 0.00039  |          | IC=1;IHP= DP:DP2:T/57:57:33,3 88:88:26,2 G         | GC   | 0 |
|          |          | IC=6;IHP= DP:DP2:T/81:81:76,7 175:175:12 TC        | T    | 0 |

|          |          |                                              |    |   |
|----------|----------|----------------------------------------------|----|---|
| .        | .        | IC=5;IHP= DP:DP2:T/74:74:69,6 151:151:11GC   | G  | 0 |
| 0.000194 | .        | IC=6;IHP= DP:DP2:T/69:69:62,6 124:124:92GA   | G  | 0 |
| .        | .        | IC=5;IHP= DP:DP2:T/33:33:32,3 64:64:46,4 CG  | C  | 0 |
| .        | .        | IC=6;IHP= DP:DP2:T/228:228:21467:467:35 GC   | G  | 0 |
| .        | .        | IC=4;IHP= DP:DP2:T/86:86:83,8 215:215:16TG   | T  | 0 |
| .        | .        | IC=5;IHP= DP:DP2:T/19:19:20,2 24:24:9,9:7TG  | T  | 0 |
| .        | .        | IC=6;IHP= DP:DP2:T/154:154:14271:271:22GT    | G  | 0 |
| .        | .        | IC=1;IHP= DP:DP2:T/61:61:63,6 112:112:86GAGA | G  | 0 |
| .        | .        | IC=7;IHP= DP:DP2:T/129:129:11265:265:15TC    | T  | 0 |
| .        | .        | IC=9;IHP= DP:DP2:T/107:107:10225:225:17C     | CA | 0 |
| .        | .        | IC=6;IHP= DP:DP2:T/27:27:24,2 52:52:30,3 CA  | C  | 0 |
| .        | .        | IC=5;IHP= DP:DP2:T/44:44:41,4 69:69:51,5 CG  | C  | 0 |
| .        | .        | IC=6;IHP= DP:DP2:T/240:240:23562:562:45AC    | A  | 0 |
| .        | .        | IC=4;IHP= DP:DP2:T/75:75:71,7 131:131:10GA   | G  | 0 |
| .        | .        | IC=9;IHP= DP:DP2:T/77:77:72,7 127:127:94A    | AT | 0 |
| .        | .        | IC=5;IHP= DP:DP2:T/267:267:25479:479:35GC    | G  | 0 |
| .        | .        | IC=5;IHP= DP:DP2:T/54:54:54,5 83:83:59,5 T   | TC | 0 |
| .        | .        | IC=4;IHP= DP:DP2:T/122:122:11196:196:15TC    | T  | 0 |
| .        | .        | IC=3;IHP= DP:DP2:T/129:129:13247:247:15TG    | T  | 0 |
| .        | .        | IC=4;IHP= DP:DP2:T/67:67:65,6 152:152:12CG   | C  | 0 |
| .        | .        | IC=9;IHP= DP:DP2:T/95:95:93,9 188:188:14C    | CG | 0 |
| .        | .        | IC=6;IHP= DP:DP2:T/45:45:47,4 74:74:52,5 GA  | G  | 0 |
| .        | .        | IC=3;IHP= DP:DP2:T/224:224:22547:547:44AC    | A  | 0 |
| .        | .        | IC=9;IHP= DP:DP2:T/100:100:84192:192:12A     | AC | 0 |
| .        | .        | IC=9;IHP= DP:DP2:T/185:185:17384:384:25T     | TG | 0 |
| .        | .        | IC=4;IHP= DP:DP2:T/26:26:34,3 38:38:21,2 CG  | C  | 0 |
| .        | .        | IC=6;IHP= DP:DP2:T/83:83:74,7 196:196:15TC   | T  | 0 |
| .        | .        | IC=4;IHP= DP:DP2:T/39:39:34,3 71:71:43,4 CAG | C  | 0 |
| .        | .        | IC=6;IHP= DP:DP2:T/82:82:81,8 191:191:14T    | TG | 0 |
| .        | .        | IC=4;IHP= DP:DP2:T/226:226:21418:418:33TC    | T  | 0 |
| .        | .        | IC=9;IHP= DP:DP2:T/246:246:23516:516:40A     | AC | 0 |
| .        | .        | IC=7;IHP= DP:DP2:T/104:104:10207:207:15AC    | A  | 0 |
| .        | .        | IC=5;IHP= DP:DP2:T/156:156:14370:370:27GC    | G  | 0 |
| .        | .        | IC=7;IHP= DP:DP2:T/39:39:36,3 84:84:62,6 GA  | G  | 0 |
| .        | .        | IC=7;IHP= DP:DP2:T/65:65:62,6 144:144:10CT   | C  | 0 |
| .        | .        | IC=6;IHP= DP:DP2:T/78:78:72,7 175:175:14GC   | G  | 0 |
| .        | .        | IC=9;IHP= DP:DP2:T/136:136:12223:223:17A     | AG | 0 |
| .        | .        | IC=8;IHP= DP:DP2:T/86:86:78,7 141:141:10C    | CG | 0 |
| .        | .        | IC=7;IHP= DP:DP2:T/34:34:33,3 51:51:37,3 CA  | C  | 0 |
| .        | .        | IC=5;IHP= DP:DP2:T/65:65:61,6 93:93:72,7 TG  | T  | 0 |
| .        | .        | IC=9;IHP= DP:DP2:T/95:95:90,9 161:161:12C    | CT | 0 |
| .        | .        | IC=7;IHP= DP:DP2:T/104:104:10230:230:17CA    | C  | 0 |
| .        | .        | IC=7;IHP= DP:DP2:T/52:52:46,4 74:74:48,4 AC  | A  | 0 |
| .        | .        | IC=1;IHP= DP:DP2:T/97:97:96,9 158:158:13GC   | G  | 0 |
| 0.003326 | 0.001393 | IC=0;IHP= DP:DP2:T/26:26:25,2 48:48:28,2 AG  | A  | 0 |
| .        | .        | IC=5;IHP= DP:DP2:T/95:95:94,9 155:155:12GC   | G  | 0 |
| .        | .        | IC=8;IHP= DP:DP2:T/149:149:14242:242:16C     | CG | 0 |
| 0.003911 | .        | IC=7;IHP= DP:DP2:T/127:127:11299:299:22TC    | T  | 0 |
| .        | .        | IC=5;IHP= DP:DP2:T/72:72:72,7 137:137:10TC   | T  | 0 |
| .        | .        | IC=4;IHP= DP:DP2:T/47:47:44,4 102:102:77AG   | A  | 0 |
| .        | .        | IC=6;IHP= DP:DP2:T/46:46:46,4 91:91:63,6 CT  | C  | 0 |
| .        | .        | IC=7;IHP= DP:DP2:T/86:86:83,8 133:133:10AG   | A  | 0 |
| .        | .        | IC=5;IHP= DP:DP2:T/75:75:71,7 176:176:12AC   | A  | 0 |
| .        | .        | IC=5;IHP= DP:DP2:T/129:129:11262:262:15GC    | G  | 0 |

|          |          |                                                    |          |   |
|----------|----------|----------------------------------------------------|----------|---|
| .        | .        | IC=7;IHP= DP:DP2:T/137:137:12240:240:1E A          | AC       | 0 |
| .        | .        | IC=6;IHP= DP:DP2:T/51:51:49,5 82:82:46,4 AC        | A        | 0 |
| .        | .        | IC=6;IHP= DP:DP2:T/48:48:48,4 135:135:10 GT        | G        | 0 |
| .        | .        | IC=5;IHP= DP:DP2:T/88:88:87,8 136:136:11 CT        | C        | 0 |
| .        | .        | IC=8;IHP= DP:DP2:T/94:94:91,9 200:200:14 G         | GC       | 0 |
| .        | .        | IC=9;IHP= DP:DP2:T/72:72:66,6 123:123:9E A         | AT       | 0 |
| .        | .        | IC=7;IHP= DP:DP2:T/81:81:79,7 113:113:7E AG        | A        | 0 |
| .        | .        | IC=8;IHP= DP:DP2:T/118:118:11203:203:1E A          | AC       | 0 |
| .        | .        | IC=5;IHP= DP:DP2:T/167:167:1E 372:372:2E T         | TG       | 0 |
| .        | .        | IC=7;IHP= DP:DP2:T/74:74:72,7 134:134:10 G         | GC       | 0 |
| 0.000194 | .        | IC=5;IHP= DP:DP2:T/118:118:11268:268:21 TG         | T        | 0 |
| .        | .        | IC=5;IHP= DP:DP2:T/53:53:53,5 74:74:58,5 CG        | C        | 0 |
| .        | .        | IC=9;IHP= DP:DP2:T/81:81:77,7 159:159:10 A         | AG       | 0 |
| .        | .        | IC=0;IHP= DP:DP2:T/46:46:46,4 81:81:61,6 CCGG      | C        | 0 |
| .        | .        | IC=2;IHP= DP:DP2:T/124:124:12212:212:1E A          | AGGTGCT  | 0 |
| .        | .        | IC=2;IHP= DP:DP2:T/125:125:10 237:237:1E C         | CCTGAAG  | 0 |
| .        | .        | IC=0;IHP= DP:DP2:T/81:81:90,9 161:161:17 CCATCTT C | C        | 0 |
| .        | .        | IC=2;IHP= DP:DP2:T/90:90:86,8 149:149:1E AGCACTGA  | A        | 0 |
| .        | .        | IC=0;IHP= DP:DP2:T/73:73:73,7 165:165:1E GTCTCCCG  | G        | 0 |
| .        | .        | IC=0;IHP= DP:DP2:T/95:95:81,8 169:169:14 CATTGT.C  | C        | 0 |
| 0.000451 | .        | IC=2;IHP= DP:DP2:T/145:145:1E 152:152:1E GGAGGC(G  | G        | 0 |
| 0.002163 | 0.004448 | IC=2;IHP= DP:DP2:T/90:90:87,9 122:122:11 T         | TTGTGC   | 0 |
| 0.180922 | 0.286092 | IC=1;IHP= DP:DP2:T/16:16:16,1 7:7:1,1:6,6 G        | GGAA     | 0 |
| .        | .        | IC=1;IHP= DP:DP2:T/77:77:76,9 107:107:91 A         | AGGAGG   | 0 |
| .        | .        | IC=0;IHP= DP:DP2:T/80:80:84,9 149:149:1E AGGAGG/A  | A        | 0 |
| .        | .        | IC=5;IHP= DP:DP2:T/171:171:1E 229:229:20 ATCCTCC A | A        | 0 |
| .        | .        | IC=1;IHP= DP:DP2:T/100:100:10 133:133:11 T         | TTCACGG  | 0 |
| .        | .        | IC=0;IHP= DP:DP2:T/219:219:20 189:189:1E CGGATGC C | C        | 0 |
| .        | .        | IC=0;IHP= DP:DP2:T/76:76:106, 108:108:1E GCGTCCCG  | G        | 0 |
| .        | .        | IC=0;IHP= DP:DP2:T/81:81:89,8 149:149:1E ACTCAAT/A | A        | 0 |
| .        | 0.00088  | IC=4;IHP= DP:DP2:T/114:114:8E 243:243:1E AAAAAC A  | A        | 0 |
| .        | .        | IC=0;IHP= DP:DP2:T/82:82:82,8 148:148:14 TCCATGT T | T        | 0 |
| .        | .        | IC=0;IHP= DP:DP2:T/83:83:79,9 240:240:2E AGGTGTCA  | A        | 0 |
| .        | .        | IC=2;IHP= DP:DP2:T/90:90:89,8 159:159:14 ACTCCT A  | A        | 0 |
| .        | 0.00088  | IC=2;IHP= DP:DP2:T/130:130:12 158:158:14 CCAGTA C  | C        | 0 |
| .        | .        | IC=1;IHP= DP:DP2:T/116:116:12 241:241:2E AGAGTT A  | A        | 0 |
| .        | .        | IC=0;IHP= DP:DP2:T/123:123:12 248:248:2E CCGGGAC C | C        | 0 |
| .        | .        | IC=0;IHP= DP:DP2:T/147:147:1E 194:194:17 GCCAAGC G | G        | 0 |
| .        | .        | IC=1;IHP= DP:DP2:T/78:78:78,7 159:159:1E GA        | G        | 0 |
| .        | .        | IC=2;IHP= DP:DP2:T/98:98:91,9 200:200:1E G         | GCAA     | 0 |
| .        | .        | IC=2;IHP= DP:DP2:T/101:101:9E 232:232:17 A         | ACGC     | 0 |
| .        | .        | IC=0;IHP= DP:DP2:T/65:65:75,7 121:121:1E TGGGGAC T | T        | 0 |
| 0.039913 | 0.190813 | IC=7;IHP= DP:DP2:T/20:20:18,1 35:35:11,1 G         | GT       | 0 |
| .        | .        | IC=0;IHP= DP:DP2:T/60:60:70,7 72:72:67,6 AAGTTGCA  | A        | 0 |
| .        | .        | IC=4;IHP= DP:DP2:T/115:115:10 186:186:1E CGAGGAC C | C        | 0 |
| 0.000235 | .        | IC=0;IHP= DP:DP2:T/40:40:45,4 51:51:41,4 GGCCGC(G  | G        | 0 |
| .        | .        | IC=2;IHP= DP:DP2:T/111:111:10 223:223:1E AC        | A        | 0 |
| .        | .        | IC=0;IHP= DP:DP2:T/499:499:54 706:706:6E CGCCGC(C  | C        | 0 |
| .        | .        | IC=7;IHP= DP:DP2:T/92:92:91,9 219:219:17 A         | AG       | 0 |
| .        | .        | IC=7;IHP= DP:DP2:T/106:106:9E 71:71:44,4 A         | AC       | 0 |
| 0.00366  | 0.048893 | IC=5;IHP= DP:DP2:T/90:90:64,6 234:234:1E C         | CGCGGG(G | 0 |
| .        | .        | IC=2;IHP= DP:DP2:T/75:75:74,7 102:102:80 GC        | G        | 0 |
| .        | .        | IC=7;IHP= DP:DP2:T/225:225:21 298:298:2E C         | CG       | 0 |
| .        | .        | IC=0;IHP= DP:DP2:T/114:114:1E 178:178:1E CCCCAAA C | C        | 0 |

|          |          |                                                     |        |   |
|----------|----------|-----------------------------------------------------|--------|---|
| .        | .        | IC=4;IHP= DP:DP2:T/77:77:75,7 180:180:14 T          | TG     | 0 |
| 0.000194 | .        | IC=1;IHP= DP:DP2:T/54:54:52,5 56:56:37,3 ATCT       | A      | 0 |
| .        | .        | IC=2;IHP= DP:DP2:T/76:76:76,7 117:117:92 T          | TA     | 0 |
| 0.000194 | 0.003521 | IC=2;IHP= DP:DP2:T/76:76:77,7 151:151:14 CGGGCG C   | C      | 0 |
| .        | .        | IC=2;IHP= DP:DP2:T/74:74:72,7 93:93:79,7 C          | CTTG   | 0 |
| .        | .        | IC=2;IHP= DP:DP2:T/72:72:73,7 68:68:58,5 CAAGGG C   | C      | 0 |
| .        | .        | IC=3;IHP= DP:DP2:T/90:90:88,8 60:60:47,5 G          | GC     | 0 |
| .        | .        | IC=6;IHP= DP:DP2:T/101:101:90 151:151:12 CCAGCAC C  | C      | 0 |
| .        | .        | IC=0;IHP= DP:DP2:T/29:29:29,2 82:82:55,5 TA         | T      | 0 |
| 0.002622 | 0.002727 | IC=0;IHP= DP:DP2:T/191:191:19 202:202:19 TTTTGT T   | T      | 0 |
| .        | .        | IC=2;IHP= DP:DP2:T/82:82:78,7 198:198:19 CG         | C      | 0 |
| .        | .        | IC=2;IHP= DP:DP2:T/67:67:65,6 175:175:12 G          | GT     | 0 |
| .        | .        | IC=1;IHP= DP:DP2:T/109:109:10 88:88:76,7 A          | AATTCT | 0 |
| .        | .        | IC=0;IHP= DP:DP2:T/77:77:82,8 242:242:23 AGAGCG C A | A      | 0 |
| .        | .        | IC=0;IHP= DP:DP2:T/84:84:89,8 178:178:19 CCCAGG C C | C      | 0 |
| .        | .        | IC=1;IHP= DP:DP2:T/81:81:78,7 77:77:63,6 AGAGCC C A | A      | 0 |
| .        | .        | IC=0;IHP= DP:DP2:T/73:73:88,8 81:81:72,7 GCCGCG C G | G      | 0 |
| .        | .        | IC=1;IHP= DP:DP2:T/93:93:97,9 163:163:19 CGAGGT C C | C      | 0 |
| .        | .        | IC=0;IHP= DP:DP2:T/19:19:20,2 50:50:28,2 TTGATCA T  | T      | 0 |
| 0.023056 | .        | IC=0;IHP= DP:DP2:T/48:48:46,4 33:33:24,2 TA         | T      | 0 |
| 0.000389 | 0.001393 | IC=2;IHP= DP:DP2:T/148:148:14 279:279:29 GGGGCC C G | G      | 0 |
| .        | 0.000882 | IC=4;IHP= DP:DP2:T/161:161:14 222:222:17 TCCGCC C T | T      | 0 |
| .        | .        | IC=2;IHP= DP:DP2:T/126:126:12 145:145:72 G          | GCTGT  | 0 |
| .        | .        | IC=2;IHP= DP:DP2:T/81:81:76,8 104:104:52 C          | CT     | 0 |
| .        | .        | IC=8;IHP= DP:DP2:T/118:118:10 295:295:19 A          | AT     | 0 |
| .        | .        | IC=0;IHP= DP:DP2:T/53:53:55,5 182:182:19 AGG        | A      | 0 |
| .        | .        | IC=3;IHP= DP:DP2:T/113:113:11 232:232:19 CTT        | C      | 0 |
| .        | .        | IC=0;IHP= DP:DP2:T/77:77:79,8 69:69:62,6 GTCTGCC G  | G      | 0 |

| shared_her | OMIM        | GWAS_Pu | HGMD_ID | GO_BP     | GO_CC      | GO_MF     | KEGG_PA  | PID_PATH  |
|------------|-------------|---------|---------|-----------|------------|-----------|----------|-----------|
| 0          | .           | NA      | .       | MULTI_OF. | .          | TRANSCR.  | .        | .         |
| 0          | {Celiac dis | NA      | .       | IMMUNE_I  | INTRINSIC. | .         | KEGG_CE  | PID_NFAT  |
| 0          | .           | NA      | .       | .         | .          | .         | .        | .         |
| 0          | .           | NA      | .       | ESTABLIS  | ORGANEL.   | .         | KEGG_SN. | .         |
| 0          | .           | NA      | .       | .         | .          | .         | .        | .         |
| 0          | .           | NA      | .       | .         | .          | .         | .        | .         |
| 0          | .           | NA      | .       | .         | .          | .         | KEGG_OL. | .         |
| 0          | .           | NA      | .       | .         | .          | .         | .        | .         |
| 0          | .           | NA      | .       | .         | CYTOPLA:   | ENZYME_   | KEGG_CY. | .         |
| 0          | 17-beta-hy  | NA      | .       | LIPID_ME  | CYTOPLA:   | STEROID_  | KEGG_VA. | .         |
| 0          | .           | NA      | .       | .         | .          | .         | .        | .         |
| 0          | .           | NA      | .       | MULTI_OF  | INTRINSIC  | TRANSME   | KEGG_CY  | PID_GLYP  |
| 0          | Bleeding d  | NA      | .       | FOCAL_AI  | ADHEREN    | INTEGRIN  | KEGG_FO  | PID_ILK_F |
| 0          | .           | NA      | .       | .         | .          | .         | .        | .         |
| 0          | .           | NA      | .       | RNA_MET   | ORGANEL.   | .         | KEGG_SP. | .         |
| 0          | .           | NA      | .       | RNA_MET   | NUCLEUS    | RNA_BINC. | .        | .         |
| 0          | .           | NA      | .       | .         | .          | .         | KEGG_TG. | .         |
| 0          | .           | NA      | .       | .         | .          | .         | .        | .         |
| 0          | Bronchiect  | NA      | .       | ESTABLIS  | INTRINSIC  | CATION_T  | KEGG_TA. | .         |
| 0          | .           | NA      | .       | .         | .          | .         | .        | .         |
| 0          | .           | NA      | .       | .         | .          | .         | .        | .         |
| 0          | .           | NA      | .       | .         | .          | .         | .        | .         |
| 0          | .           | NA      | .       | .         | .          | .         | .        | PID_TAP6  |
| 0          | .           | NA      | .       | .         | .          | .         | .        | .         |
| 0          | .           | NA      | .       | RNA_MET   | NUCLEOP.   | .         | .        | .         |
| 0          | .           | NA      | .       | .         | .          | .         | .        | .         |
| 0          | .           | NA      | .       | .         | .          | .         | .        | .         |
| 0          | .           | NA      | .       | .         | .          | RECEPTO   | KEGG_CY  | PID_TNFP  |
| 0          | .           | NA      | .       | .         | .          | .         | .        | .         |
| 0          | Mental retz | NA      | .       | RNA_MET   | NUCLEOP    | TRANSCR.  | .        | .         |
| 0          | .           | NA      | .       | .         | CYTOPLA:   | .         | .        | .         |
| 0          | .           | NA      | .       | .         | CYTOPLA:   | .         | .        | .         |
| 0          | .           | NA      | .       | NUCLEOB.  | .          | TRANSCR.  | .        | .         |
| 0          | .           | NA      | .       | .         | .          | .         | .        | .         |
| 0          | .           | NA      | .       | .         | .          | .         | .        | PID_ATF2  |
| 0          | .           | NA      | .       | TRNA_PRI  | .          | LIGASE_A  | KEGG_AM. | .         |
| 0          | .           | NA      | .       | POSITIVE. | .          | HYDROLA.  | .        | PID_PRLS  |
| 0          | .           | NA      | .       | GLYCOPR   | INTRINSIC. | .         | KEGG_NC  | PID_NOTC  |
| 0          | .           | NA      | .       | .         | .          | .         | KEGG_UB. | .         |
| 0          | .           | NA      | .       | .         | .          | PHOSPHC.  | .        | .         |
| 0          | .           | NA      | .       | .         | .          | .         | .        | .         |
| 0          | .           | NA      | .       | .         | .          | .         | .        | .         |
| 0          | .           | NA      | .       | PROTEOL.  | .          | METALLOI. | .        | .         |
| 0          | .           | NA      | .       | .         | .          | .         | .        | .         |
| 0          | .           | NA      | .       | .         | CYTOPLA:   | HYDROLA.  | .        | .         |
| 0          | Severe cor  | NA      | .       | REGULAT   | INTRINSIC  | PROTEIN_  | KEGG_CE  | PID_BCR_  |
| 0          | .           | NA      | .       | .         | .          | .         | .        | .         |
| 0          | .           | NA      | .       | .         | .          | .         | .        | .         |
| 0          | .           | NA      | .       | BIOPOLYM  | CELL_JUN   | NUCLEOT.  | .        | PID_CDC4  |
| 0          | .           | NA      | .       | .         | .          | .         | .        | .         |
| 0          | .           | NA      | .       | .         | .          | .         | .        | .         |

|     |                  |    |                  |               |             |             |
|-----|------------------|----|------------------|---------------|-------------|-------------|
| 0 . | NA               | .  | BIOPOLYM .       | PHOSPHO       | KEGG_CH     | PID_RHOA    |
| 0 . | NA               | .  | .                | .             | .           | .           |
| 0 . | NA               | .  | CELL_DEVELOPMENT | PEPTIDE       | .           | .           |
| 0 . | NA               | .  | .                | .             | .           | .           |
| 0 . | NA               | .  | PHOSPHO          | ORGANEL       | TRANSFER    | KEGG_GL     |
| 0 . | NA               | .  | MACROMOLECULE    | CYTOPLASMIC   | RIBONUCLEIC | .           |
| 0 . | NA               | .  | .                | EXTRACELLULAR | .           | .           |
| 0 . | NA               | .  | .                | .             | .           | .           |
| 0 . | NA               | .  | MULTICELLULAR    | NUCLEUS       | .           | .           |
| 0 . | NA               | .  | MULTI-OFF        | TRANSCRIPTION | .           | .           |
| 0 . | NA               | .  | REGULATION       | INTRINSIC     | TRANSFER    | KEGG_CY     |
| 0 . | NA               | .  | .                | .             | .           | .           |
| 0 . | NA               | .  | .                | .             | .           | .           |
| 0 . | NA               | .  | .                | .             | .           | .           |
| 0 . | NA               | .  | .                | RNA           | POLYMERASE  | KEGG_MA     |
| 0 . | NA               | .  | SIGNAL           | TRANSDUCTION  | KEGG_PU     | .           |
| 0 . | NA               | .  | .                | .             | .           | .           |
| 0 . | Cardiomyocyte    | NA | MUSCLE           | ORGANEL       | NUCLEOTIDE  | KEGG_HY     |
| 0 . | Candidiasis      | NA | RNA              | METABOLISM    | CYTOPLASMIC | RECEPTOR    |
| 0 . | NA               | .  | POSITIVE         | CYTOPLASMIC   | TRANSLATION | .           |
| 0 . | NA               | .  | .                | .             | .           | .           |
| 0 . | NA               | .  | SYSTEM           | INTRINSIC     | INTEGRIN    | .           |
| 0 . | Mitochondrial    | NA | .                | .             | .           | .           |
| 0 . | NA               | .  | .                | .             | .           | .           |
| 0 . | NA               | .  | .                | .             | .           | .           |
| 0 . | NA               | .  | .                | .             | .           | .           |
| 0 . | NA               | .  | SYSTEM           | CYTOPLASMIC   | RAS         | GTPASE      |
| 0 . | NA               | .  | SYSTEM           | .             | .           | PID_NOTCH   |
| 0 . | NA               | .  | REGULATION       | CYTOPLASMIC   | GTPASE      | .           |
| 0 . | ?Congenital      | NA | GLYCOPROTEIN     | CYTOPLASMIC   | .           | .           |
| 0 . | NA               | .  | .                | CYTOPLASMIC   | .           | .           |
| 0 . | NA               | .  | .                | .             | .           | .           |
| 0 . | NA               | .  | RNA              | METABOLISM    | NUCLEUS     | RNA_BINDING |
| 0 . | NA               | .  | .                | .             | .           | .           |
| 0 . | NA               | .  | BIOPOLYM         | CYTOPLASMIC   | ENZYME      | KEGG_CH     |
| 0 . | Sinoatrial node  | NA | ESTABLISHED      | MEMBRANE      | CATION      | TRANSPORT   |
| 0 . | NA               | .  | .                | .             | .           | .           |
| 0 . | ACAD9 deficiency | NA | .                | .             | .           | .           |
| 0 . | NA               | .  | .                | .             | .           | PID_TRKR    |
| 0 . | NA               | .  | .                | .             | .           | .           |
| 0 . | NA               | .  | MUSCLE           | CYTOPLASMIC   | RNA_BINDING | .           |
| 0 . | NA               | .  | REGULATION       | INTRINSIC     | .           | KEGG_CE     |
| 0 . | NA               | .  | SYSTEM           | .             | .           | KEGG_TG     |
| 0 . | NA               | .  | .                | .             | .           | PID_BMPF    |
| 0 . | NA               | .  | .                | .             | .           | .           |
| 0 . | UV-sensitive     | NA | .                | .             | .           | .           |
| 0 . | NA               | .  | .                | .             | .           | .           |
| 0 . | NA               | .  | .                | .             | .           | KEGG_GL     |
| 0 . | NA               | .  | .                | .             | .           | .           |
| 0 . | NA               | .  | .                | .             | .           | .           |
| 0 . | NA               | .  | .                | .             | .           | .           |
| 0 . | NA               | .  | .                | .             | .           | .           |
| 0 . | NA               | .  | DNA              | METABOLISM    | .           | .           |
| 0 . | Adermatoglycan   | NA | DNA              | METABOLISM    | MEMBRANE    | RECEPTOR    |
| 0 . | Hypomagnesemia   | NA | DNA              | METABOLISM    | MEMBRANE    | RECEPTOR    |

|               |    |   |   |           |           |           |
|---------------|----|---|---|-----------|-----------|-----------|
| 0 .           | NA | . | . | MACROMOL. | KEGG_ER   | PID_IFNGI |
| 0 .           | NA | . | . | ARYLSULF. | .         | .         |
| 0 .           | NA | . | . | .         | .         | .         |
| 0 .           | NA | . | . | .         | KEGG_BA   | .         |
| 0 .           | NA | . | . | .         | .         | .         |
| 0 .           | NA | . | . | .         | .         | .         |
| 0 .           | NA | . | . | ENZYME_   | PHOSPHO   | PID_RHO/  |
| 0 Chondroca   | NA | . | . | SYSTEM_   | MEMBRAN   | ACTIVE_T. |
| 0 .           | NA | . | . | .         | .         | .         |
| 0 Joubert sy  | NA | . | . | .         | .         | .         |
| 0 Amyloidosi  | NA | . | . | SIGNAL_T  | INTRINSIC | RECEPTO   |
| 0 .           | NA | . | . | .         | KEGG_CY   | .         |
| 0 Hermansk    | NA | . | . | ESTABLIS  | CYTOPLA:  | KEGG_LY:  |
| 0 Acampom     | NA | . | . | CELL_DE   | RIBONUCI. | PID_ERA_  |
| 0 .           | NA | . | . | .         | .         | .         |
| 0 .           | NA | . | . | .         | .         | .         |
| 0 .           | NA | . | . | SYSTEM_   | EXTRACE   | KEGG_AX.  |
| 0 .           | NA | . | . | SYSTEM_   | EXTRACE   | KEGG_AX.  |
| 0 .           | NA | . | . | .         | KEGG_GL   | .         |
| 0 .           | NA | . | . | DEFENSE.  | KEGG_NA   | .         |
| 0 Trichohep   | NA | . | . | .         | HYDROLA   | KEGG_RN.  |
| 0 .           | NA | . | . | BIOPOLY   | INTRINSIC | RECEPTO.  |
| 0 .           | NA | . | . | .         | PID_AMB2  | .         |
| 0 .           | NA | . | . | .         | KEGG_CE   | .         |
| 0 .           | NA | . | . | .         | .         | .         |
| 0 .           | NA | . | . | .         | .         | .         |
| 0 .           | NA | . | . | .         | .         | .         |
| 0 .           | NA | . | . | .         | .         | .         |
| 0 Obesity, se | NA | . | . | SYSTEM_   | TRANSCR.  | .         |
| 0 Mental ret  | NA | . | . | REGULAT   | INTRINSIC | GLUTAMA   |
| 0 .           | NA | . | . | .         | KEGG_NE   | .         |
| 0 .           | NA | . | . | ESTABLIS  | MEMBRAN   | .         |
| 0 {Psoriasis  | NA | . | . | POSITIVE. | .         | .         |
| 0 Cardiomyo   | NA | . | . | PROTEIN/  | STRUCTU   | KEGG_FO   |
| 0 .           | NA | . | . | .         | PID_INTE  | .         |
| 0 .           | NA | . | . | SIGNAL_T  | GTP_BINC  | .         |
| 0 .           | NA | . | . | .         | .         | .         |
| 0 .           | NA | . | . | .         | .         | .         |
| 0 Hepatocell  | NA | . | . | ESTABLIS  | ORGANEL   | TRANSME   |
| 0 .           | NA | . | . | .         | KEGG_LY:  | .         |
| 0 .           | NA | . | . | .         | .         | .         |
| 0 .           | NA | . | . | .         | .         | .         |
| 0 .           | NA | . | . | .         | .         | .         |
| 0 .           | NA | . | . | MULTICEL  | .         | .         |
| 0 .           | NA | . | . | .         | .         | .         |
| 0 .           | NA | . | . | PROTEIN_  | CYTOPLA:  | ENZYME_   |
| 0 .           | NA | . | . | PROTEIN_  | CYTOPLA:  | ENZYME_   |
| 0 .           | NA | . | . | NEGATIVE  | CYTOPLA:  | .         |
| 0 .           | NA | . | . | .         | .         | .         |
| 0 .           | NA | . | . | .         | .         | .         |
| 0 Cutis laxa, | NA | . | . | SYSTEM_   | .         | .         |
| 0 .           | NA | . | . | .         | .         | .         |
| 0 .           | NA | . | . | .         | .         | .         |
| 0 .           | NA | . | . | SYSTEM_   | INTRINSIC | KEGG_AX   |
| 0 .           | NA | . | . | .         | PID_EPHE  | .         |



|                |    |   |                     |                   |            |
|----------------|----|---|---------------------|-------------------|------------|
| 0 .            | NA | . | RNA_MET .           | RNA_POL .         | .          |
| 0 .            | NA | . | .                   | .                 | .          |
| 0 .            | NA | . | STEROID .           | ALDO_KE KEGG_FR . | .          |
| 0 .            | NA | . | ORGANEL .           | .                 | .          |
| 0 Ventricular  | NA | . | .                   | .                 | .          |
| 0 Barrett esc  | NA | . | ESTABLIS INTRINSIC  | RECEPTO .         | .          |
| 0 .            | NA | . | .                   | KEGG_EN .         | .          |
| 0 .            | NA | . | .                   | .                 | .          |
| 0 .            | NA | . | .                   | .                 | .          |
| 0 {?Schizop    | NA | . | NEGATIVE .          | TRANSCR KEGG_ER   | PID_ERBE   |
| 0 .            | NA | . | .                   | .                 | .          |
| 0 .            | NA | . | REGULAT MEMBRAN     | PHOSPHC KEGG_CH   | PID_FCER   |
| 0 .            | NA | . | SYSTEM_ .           | TRANSCR .         | PID_HES_   |
| 0 .            | NA | . | .                   | .                 | .          |
| 0 .            | NA | . | .                   | .                 | .          |
| 0 Seizures, t  | NA | . | ESTABLIS INTRINSIC  | CATION_T .        | .          |
| 0 .            | NA | . | SYSTEM_   INTRINSIC | G_PROTE KEGG_P5 . | .          |
| 0 .            | NA | . | .                   | CYTOPLA: ELECTRO  | KEGG_OX .  |
| 0 .            | NA | . | .                   | .                 | .          |
| 0 .            | NA | . | RESPONS .           | .                 | .          |
| 0 .            | NA | . | MACROM(CELL_PR(C    | PROTEIN_ KEGG_FO  | PID_RHO/   |
| 0 .            | NA | . | .                   | .                 | .          |
| 0 .            | NA | . | .                   | NUCLEUS .         | .          |
| 0 Basal cell c | NA | . | SYSTEM_   INTRINSIC | RECEPTO KEGG_HE   | PID_HEDC   |
| 0 Basal cell c | NA | . | SYSTEM_   INTRINSIC | RECEPTO KEGG_HE   | PID_HEDC   |
| 0 .            | NA | . | BIOPOLYM            | ORGANEL .         | .          |
| 0 .            | NA | . | .                   | KEGG_OL .         | .          |
| 0 .            | NA | . | .                   | NUCLEUS .         | .          |
| 0 .            | NA | . | ESTABLIS CYTOPLA:   | .                 | .          |
| 0 .            | NA | . | .                   | .                 | .          |
| 0 .            | NA | . | PROTEOL             | ORGANEL METALLO . | .          |
| 0 .            | NA | . | .                   | .                 | .          |
| 0 .            | NA | . | .                   | .                 | .          |
| 0 .            | NA | . | .                   | .                 | .          |
| 0 .            | NA | . | .                   | .                 | .          |
| 0 .            | NA | . | CARBOXY .           | KEGG_AL .         | .          |
| 0 .            | NA | . | .                   | .                 | .          |
| 0 .            | NA | . | .                   | .                 | .          |
| 0 .            | NA | . | RNA_MET .           | NUCLEAR .         | .          |
| 0 .            | NA | . | .                   | ORGANEL HYDROLA . | .          |
| 0 .            | NA | . | .                   | .                 | .          |
| 0 .            | NA | . | .                   | .                 | .          |
| 0 .            | NA | . | .                   | .                 | PID_AR_P   |
| 0 .            | NA | . | IMMUNE_   CYTOPLA:  | .                 | .          |
| 0 .            | NA | . | .                   | .                 | .          |
| 0 Cone dystr   | NA | . | SENSORY .           | KEGG_PU           | PID_CONE   |
| 0 .            | NA | . | .                   | ORGANEL STRUCTU . | .          |
| 0 .            | NA | . | .                   | NUCLEAR .         | .          |
| 0 .            | NA | . | REGULAT NUCLEOP     | PROTEIN_ .        | PID_MTOF   |
| 0 {Influenza,  | NA | . | IMMUNE_   MEMBRAN . | .                 | .          |
| 0 .            | NA | . | .                   | .                 | .          |
| 0 .            | NA | . | SYSTEM_ .           | NUCLEOT .         | PID_LKB1 . |
| 0 .            | NA | . | .                   | KEGG_OL .         | .          |

|                |    |   |                   |             |            |           |           |   |
|----------------|----|---|-------------------|-------------|------------|-----------|-----------|---|
| 0 .            | NA | . | .                 | .           | .          | .         | .         | . |
| 0 .            | NA | . | .                 | .           | .          | .         | .         | . |
| 0 .            | NA | . | .                 | .           | .          | .         | .         | . |
| 0 Dystonia 2   | NA | . | .                 | .           | .          | .         | .         | . |
| 0 .            | NA | . | .                 | .           | .          | KEGG_ST . | .         | . |
| 0 {Diabetes r  | NA | . | ESTABLIS CYTOPLA: | KINASE_B    | KEGG_MA    | PID_REEL  | .         | . |
| 0 .            | NA | . | .                 | .           | .          | .         | .         | . |
| 0 .            | NA | . | .                 | .           | RNA_BIN    | .         | .         | . |
| 0 .            | NA | . | SIGNAL_T          | CYTOPLA:    | .          | KEGG_CH   | PID_HDAC  | . |
| 0 .            | NA | . | .                 | .           | .          | .         | .         | . |
| 0 .            | NA | . | .                 | .           | .          | .         | .         | . |
| 0 .            | NA | . | .                 | MEMBRAN     | PHOSPHC.   | .         | .         | . |
| 0 .            | NA | . | .                 | .           | .          | .         | .         | . |
| 0 .            | NA | . | .                 | .           | .          | .         | .         | . |
| 0 Hemorrhag    | NA | . | .                 | .           | .          | KEGG_CE   | PID_AMB2  | . |
| 0 .            | NA | . | RNA_MET           | ORGANEL     | TRANSCR.   | .         | .         | . |
| 0 .            | NA | . | .                 | .           | TRANSFEI   | KEGG_O_ . | .         | . |
| 0 .            | NA | . | RNA_MET           | NUCLEUS .   | .          | .         | .         | . |
| 0 .            | NA | . | CELL_DE\          | MEMBRAN     | PROTEIN_   | KEGG_AD   | PID_BCR_  | . |
| 0 .            | NA | . | .                 | .           | .          | .         | .         | . |
| 0 .            | NA | . | .                 | .           | .          | .         | .         | . |
| 0 .            | NA | . | .                 | .           | .          | .         | .         | . |
| 0 .            | NA | . | .                 | .           | .          | .         | .         | . |
| 0 .            | NA | . | .                 | .           | .          | .         | .         | . |
| 0 .            | NA | . | .                 | .           | .          | .         | .         | . |
| 0 .            | NA | . | .                 | .           | .          | .         | .         | . |
| 0 .            | NA | . | .                 | .           | .          | .         | .         | . |
| 0 .            | NA | . | .                 | .           | .          | .         | .         | . |
| 0 .            | NA | . | .                 | .           | .          | .         | .         | . |
| 0 .            | NA | . | .                 | .           | .          | .         | .         | . |
| 0 .            | NA | . | .                 | .           | .          | .         | .         | . |
| 0 .            | NA | . | ESTABLIS          | INTRINSIC   | CATION_T   | KEGG_LY:  | PID_HIF2F | . |
| 0 Cognitive ii | NA | . | SYSTEM_           | INTRINSIC . | .          | .         | .         | . |
| 0 .            | NA | . | MACROM(C          | CYTOPLA:    | TRANSLA'   | KEGG_MT   | PID_MTOF  | . |
| 0 .            | NA | . | RNA_MET .         | TRANSCR .   | .          | .         | .         | . |
| 0 .            | NA | . | NEGATIVE          | ORGANEL     | PROTEIN_ . | PID_ATR_  | .         | . |
| 0 Deafness,    | NA | . | SENSORY           | ORGANEL .   | .          | .         | .         | . |
| 0 .            | NA | . | LIPID_ME          | INTRINSIC   | CATION_E   | KEGG_AL   | PID_AMB2  | . |
| 0 .            | NA | . | .                 | .           | .          | .         | .         | . |
| 0 .            | NA | . | RNA_MET           | CYTOPLA:    | RNA_POL .  | .         | .         | . |
| 0 .            | NA | . | RNA_MET           | NUCLEOP     | TRANSCR    | KEGG_AN   | PID_P53D  | . |
| 0 .            | NA | . | .                 | .           | .          | .         | .         | . |
| 0 .            | NA | . | MACROM(C          | .           | .          | KEGG_AD . | .         | . |
| 0 .            | NA | . | .                 | .           | .          | .         | .         | . |
| 0 .            | NA | . | .                 | .           | .          | KEGG_AV . | .         | . |
| 0 .            | NA | . | POSITIVE_ .       | TRANSLA' .  | .          | .         | .         | . |
| 0 .            | NA | . | .                 | .           | .          | .         | .         | . |
| 0 .            | NA | . | .                 | .           | .          | KEGG_WI   | PID_WNT_  | . |
| 0 Bleeding d   | NA | . | FOCAL_AI          | ADHEREN     | INTEGRIN   | KEGG_FO   | PID_ILK_F | . |
| 0 .            | NA | . | .                 | .           | .          | .         | .         | . |
| 0 .            | NA | . | .                 | .           | .          | .         | .         | . |
| 0 .            | NA | . | CELL_PR(C         | CYTOPLA:    | CATION_E . | .         | .         | . |
| 0 .            | NA | . | .                 | .           | .          | .         | .         | . |
| 0 .            | NA | . | .                 | .           | .          | .         | .         | . |
| 0 .            | NA | . | .                 | .           | .          | .         | .         | . |
| 0 .            | NA | . | .                 | .           | .          | .         | .         | . |
| 0 .            | NA | . | .                 | NUCLEOP .   | .          | PID_ATM_  | .         | . |
| 0 .            | NA | . | .                 | .           | .          | PHOSPHC   | KEGG_GA . | . |

|   |              |    |   |                             |           |          |          |           |   |
|---|--------------|----|---|-----------------------------|-----------|----------|----------|-----------|---|
| 0 | Amelogenin   | NA | . | .                           | .         | .        | .        | .         | . |
| 0 | .            | NA | . | .                           | .         | .        | .        | .         | . |
| 0 | .            | NA | . | .                           | INTRINSIC | .        | KEGG_CE  | .         | . |
| 0 | .            | NA | . | POSITIVE                    | .         | .        | KEGG_CE  | .         | . |
| 0 | .            | NA | . | SYSTEM_ NUCLEUS             | .         | .        | .        | .         | . |
| 0 | .            | NA | . | .                           | .         | .        | .        | .         | . |
| 0 | .            | NA | . | ENZYME_ INTRINSIC GROWTH    | .         | KEGG_NE  | PID_SHP2 | .         | . |
| 0 | Acrocallosis | NA | . | .                           | .         | .        | .        | .         | . |
| 0 | .            | NA | . | BIOPOLYM                    | .         | .        | KEGG_AX  | PID_IL4_2 | . |
| 0 | .            | NA | . | REGULAT CYTOPLA             | .         | .        | .        | .         | . |
| 0 | Nephronop    | NA | . | NEGATIVE NUCLEOP            | TRANSCR   | .        | .        | .         | . |
| 0 | .            | NA | . | .                           | .         | .        | .        | .         | . |
| 0 | .            | NA | . | .                           | .         | .        | .        | .         | . |
| 0 | .            | NA | . | .                           | .         | .        | .        | .         | . |
| 0 | .            | NA | . | .                           | .         | .        | PID_AURC | .         | . |
| 0 | .            | NA | . | .                           | .         | .        | KEGG_LY  | .         | . |
| 0 | .            | NA | . | NUCLEOB INTRINSIC PHOSPHC   | KEGG_PU   | PID_ENDC | .        | .         | . |
| 0 | .            | NA | . | HOMOPHI MEMBRAN             | .         | KEGG_CE  | PID_VEGF | .         | . |
| 0 | .            | NA | . | .                           | .         | .        | .        | .         | . |
| 0 | .            | NA | . | ESTABLIS INTRINSIC ACTIVE_T | .         | .        | .        | .         | . |
| 0 | Brittle corn | NA | . | .                           | .         | .        | .        | .         | . |
| 0 | .            | NA | . | .                           | .         | .        | .        | .         | . |
| 0 | .            | NA | . | .                           | .         | .        | .        | .         | . |
| 0 | .            | NA | . | .                           | .         | .        | .        | .         | . |
| 0 | .            | NA | . | ESTABLIS                    | .         | AUXILIAR | .        | .         | . |
| 0 | .            | NA | . | CYTOKINE ORGANEL HYDROLA    | KEGG_TIC  | .        | .        | .         | . |
| 0 | Leukemia,    | NA | . | REGULAT AXON;CYT            | RAS_GTP   | KEGG_MA  | PID_HNF3 | .         | . |
| 0 | .            | NA | . | .                           | .         | .        | .        | .         | . |
| 0 | .            | NA | . | PROTEIN_NUCLEUS             | .         | .        | .        | .         | . |
| 0 | .            | NA | . | JAK_STAT                    | .         | TRANSCR  | KEGG_ER  | PID_ERBB  | . |
| 0 | .            | NA | . | DEFENSE_CELL_SUFCOPPER      | _KEGG_GL  | .        | .        | .         | . |
| 0 | .            | NA | . | .                           | .         | .        | .        | .         | . |
| 0 | .            | NA | . | .                           | .         | .        | .        | .         | . |
| 0 | .            | NA | . | ORGANEL                     | .         | .        | .        | .         | . |
| 0 | .            | NA | . | .                           | .         | .        | .        | .         | . |
| 0 | .            | NA | . | .                           | .         | .        | .        | .         | . |
| 0 | .            | NA | . | .                           | .         | .        | .        | .         | . |
| 0 | .            | NA | . | .                           | .         | .        | KEGG_OT  | .         | . |
| 0 | .            | NA | . | .                           | .         | .        | .        | .         | . |
| 0 | .            | NA | . | REGULAT                     | .         | GTPASE_  | .        | .         | . |
| 0 | Fascioscap   | NA | . | .                           | .         | .        | .        | .         | . |
| 0 | .            | NA | . | DNA_MET CYTOPLA             | PROTEIN   | .        | .        | .         | . |
| 0 | .            | NA | . | .                           | .         | .        | .        | .         | . |
| 0 | Niemann-F    | NA | . | REGULAT ORGANEL SUBSTRA     | KEGG_LY   | .        | .        | .         | . |
| 0 | .            | NA | . | .                           | .         | NF_KAPP  | KEGG_BA  | PID_MYC   | . |
| 0 | .            | NA | . | .                           | .         | .        | .        | .         | . |
| 0 | Deafness,    | NA | . | .                           | .         | .        | .        | .         | . |
| 0 | {Colorectal  | NA | . | ENZYME_                     | .         | RECEPTO  | KEGG_TG  | PID_SMAI  | . |
| 0 | .            | NA | . | .                           | .         | .        | .        | .         | . |
| 0 | .            | NA | . | .                           | .         | .        | .        | .         | . |
| 0 | .            | NA | . | GAMETE_                     | .         | RNA_BINI | .        | .         | . |
| 0 | .            | NA | . | .                           | .         | .        | .        | .         | . |
| 0 | .            | NA | . | .                           | .         | .        | .        | .         | . |
| 0 | .            | NA | . | .                           | .         | .        | .        | .         | . |
| 0 | .            | NA | . | .                           | .         | .        | .        | .         | . |

|     |              |    |   |                         |                   |          |           |          |   |
|-----|--------------|----|---|-------------------------|-------------------|----------|-----------|----------|---|
| 0 . | NA           | .  | . | .                       | .                 | .        | .         | .        | . |
| 0 . | NA           | .  | . | INTRINSIC PROTEIN_      | .                 | .        | .         | .        | . |
| 0 . | NA           | .  | . | INTRINSIC PROTEIN_      | .                 | .        | .         | .        | . |
| 0 . | NA           | .  | . | RNA_MET NUCLEOP RNA_POL | KEGG_BA           | .        | .         | .        | . |
| 0   | C3 defici    | NA | . | SIGNAL_T                | RECEPTO           | KEGG_CC  | PID_ERB_  | .        | . |
| 0 . | NA           | .  | . | .                       | .                 | .        | .         | .        | . |
| 0 . | NA           | .  | . | .                       | .                 | .        | .         | .        | . |
| 0   | SCID, auto   | NA | . | BIOPOLYM                | .                 | KEGG_CH  | PID_IL4_2 | .        | . |
| 0   | Mucoepide    | NA | . | RNA_MET NUCLEUS         | TRANSCR           | .        | PID_AP1_  | .        | . |
| 0 . | NA           | .  | . | .                       | .                 | .        | .         | .        | . |
| 0 . | NA           | .  | . | .                       | ENZYME_           | KEGG_UB  | .         | .        | . |
| 0 . | NA           | .  | . | .                       | .                 | .        | .         | .        | . |
| 0 . | NA           | .  | . | .                       | .                 | .        | .         | .        | . |
| 0 . | NA           | .  | . | .                       | .                 | .        | .         | .        | . |
| 0 . | NA           | .  | . | .                       | .                 | .        | .         | .        | . |
| 0 . | NA           | .  | . | .                       | .                 | .        | .         | .        | . |
| 0 . | NA           | .  | . | .                       | .                 | .        | .         | .        | . |
| 0 . | NA           | .  | . | .                       | .                 | .        | .         | .        | . |
| 0 . | NA           | .  | . | SYSTEM_                 | ORGANEL PHOSPHC   | .        | PID_LKB1  | .        | . |
| 0 . | NA           | .  | . | SENSORY                 | ORGANEL           | .        | .         | .        | . |
| 0 . | NA           | .  | . | RNA_MET                 | ORGANEL           | .        | KEGG_SP   | .        | . |
| 0 . | NA           | .  | . | .                       | .                 | .        | .         | .        | . |
| 0 . | NA           | .  | . | .                       | .                 | .        | .         | .        | . |
| 0   | Colorectal   | NA | . | REGULAT                 | ORGANEL PROTEIN_  | KEGG_P5  | PID_P73P, | .        | . |
| 0 . | NA           | .  | . | SIGNAL_T                | HYDROLA           | KEGG_MA  | PID_EPHE  | .        | . |
| 0 . | NA           | .  | . | PROTEOL                 | .                 | KEGG_LY  | .         | .        | . |
| 0 . | NA           | .  | . | SIGNAL_T                | INTRINSIC CARBOHY | .        | .         | .        | . |
| 0 . | NA           | .  | . | SIGNAL_T                | RECEPTO           | .        | .         | .        | . |
| 0 . | NA           | .  | . | .                       | INTRINSIC         | .        | .         | .        | . |
| 0 . | NA           | .  | . | MITOTIC_                | CYTOPLA           | PHOSPHC  | .         | PID_LKB1 | . |
| 0 . | NA           | .  | . | .                       | .                 | ACID_AMI | KEGG_UB   | PID_ERB_ | . |
| 0 . | NA           | .  | . | .                       | .                 | .        | .         | .        | . |
| 0 . | NA           | .  | . | .                       | .                 | .        | .         | .        | . |
| 0 . | NA           | .  | . | .                       | .                 | .        | .         | .        | . |
| 0 . | NA           | .  | . | BIOSYNT                 | RIBONUCI          | RECEPTO  | .         | .        | . |
| 0   | Bohring-O    | NA | . | .                       | .                 | .        | .         | .        | . |
| 0 . | NA           | .  | . | .                       | .                 | LIGASE_A | KEGG_GL   | PID_HDAC | . |
| 0 . | NA           | .  | . | .                       | .                 | .        | .         | .        | . |
| 0 . | NA           | .  | . | .                       | CYTOPLA           | .        | .         | .        | . |
| 0 . | NA           | .  | . | SYSTEM_                 | .                 | .        | .         | .        | . |
| 0 . | NA           | .  | . | .                       | .                 | .        | .         | .        | . |
| 0   | Epileptic ei | NA | . | SYSTEM_                 | INTRINSIC         | CATION_T | .         | .        | . |
| 0 . | NA           | .  | . | .                       | .                 | .        | .         | .        | . |
| 0 . | NA           | .  | . | .                       | .                 | .        | .         | .        | . |
| 0   | Glutamate    | NA | . | COFACTC                 | CYTOPLA           | .        | KEGG_HI   | .        | . |
| 0 . | NA           | .  | . | DNA_MET                 | CYTOPLA           | DNA_BIN  | .         | .        | . |
| 0 . | NA           | .  | . | .                       | .                 | .        | .         | .        | . |
| 0 . | NA           | .  | . | .                       | .                 | .        | .         | .        | . |
| 0   | Meningiom    | NA | . | .                       | .                 | .        | .         | .        | . |
| 0 . | NA           | .  | . | .                       | .                 | .        | .         | .        | . |
| 0 . | NA           | .  | . | .                       | .                 | .        | .         | .        | . |
| 0 . | NA           | .  | . | REGULAT                 | .                 | .        | .         | .        | . |
| 0 . | NA           | .  | . | .                       | .                 | .        | .         | .        | . |

|     |             |    |           |            |            |           |          |          |
|-----|-------------|----|-----------|------------|------------|-----------|----------|----------|
| 0 . | NA          | .  | .         | .          | .          | KEGG_P5.  |          |          |
| 0 . | NA          | .  | .         | .          | .          | .         |          |          |
| 0 . | NA          | .  | BIOPOLYM  | PROTEIN_   | PROTEIN_   | PID_RB_1  |          |          |
| 0   | Ichthyosis, | NA | .         | LIPID_CA1  | VESICULA   | HYDROLA   | KEGG_ST. |          |
| 0 . | NA          | .  | .         | .          | .          | .         |          |          |
| 0 . | NA          | .  | .         | CYTOPLA:   | HYDROLA    | KEGG_RK.  |          |          |
| 0 . | NA          | .  | RNA_MET.  | TRANSCR    | KEGG_MA    | PID_BCR_  |          |          |
| 0   | Congenital  | NA | .         | ESTABLIS.  | SUBSTRA.   | .         |          |          |
| 0 . | NA          | .  | .         | .          | .          | .         |          |          |
| 0 . | NA          | .  | SIGNAL_T  | NON_MEM    | KINASE_B.  | .         |          |          |
| 0 . | NA          | .  | .         | .          | .          | .         |          |          |
| 0   | Mental retz | NA | .         | ORGANEL    | CATION_T   | KEGG_CA.  |          |          |
| 0 . | NA          | .  | .         | .          | .          | KEGG_AX.  |          |          |
| 0   | Axenfeld-R  | NA | .         | SYSTEM_    | ORGANEL    | SEQUENC.  |          |          |
| 0   | Osteogene   | NA | .         | RESPONS    | CYTOPLA:   | PROTEAS.  |          |          |
| 0 . | NA          | .  | .         | .          | .          | .         |          |          |
| 0 . | NA          | .  | .         | .          | .          | KEGG_GL.  |          |          |
| 0 . | NA          | .  | .         | .          | .          | .         |          |          |
| 0 . | NA          | .  | .         | .          | .          | .         |          |          |
| 0 . | NA          | .  | .         | .          | .          | .         |          |          |
| 0 . | NA          | .  | .         | .          | .          | .         |          |          |
| 0 . | NA          | .  | .         | .          | .          | .         |          |          |
| 0 . | NA          | .  | .         | .          | .          | .         |          |          |
| 0 . | NA          | .  | .         | .          | .          | .         |          |          |
| 0 . | NA          | .  | .         | .          | .          | .         |          |          |
| 0 . | NA          | .  | .         | .          | .          | .         |          |          |
| 0 . | NA          | .  | .         | .          | .          | .         |          |          |
| 0 . | NA          | .  | .         | .          | .          | .         |          |          |
| 0 . | NA          | .  | .         | .          | .          | .         |          |          |
| 0 . | NA          | .  | .         | .          | .          | .         |          |          |
| 0 . | NA          | .  | .         | .          | .          | .         |          |          |
| 0 . | NA          | .  | .         | .          | .          | .         |          |          |
| 0 . | NA          | .  | .         | .          | .          | .         |          |          |
| 0 . | NA          | .  | .         | .          | .          | .         |          |          |
| 0   | Pontocere   | NA | .         | CELL_DE\   | CYTOPLA:   | NUCLEOT   | KEGG_MA  | PID_P38G |
| 0   |             | NA | .         | BIOPOLYM   | CYTOPLA:   | RNA_BIN   | KEGG_AV. |          |
| 0 . | NA          | .  | ESTABLIS  | MEMBRAN    | LIPID_BIN. | PID_ARF6  |          |          |
| 0 . | NA          | .  | .         | .          | .          | .         |          |          |
| 0 . | NA          | .  | .         | .          | .          | .         |          |          |
| 0 . | NA          | .  | RNA_MET.  | HYDROLA.   | PID_HDAC   |           |          |          |
| 0 . | NA          | .  | .         | .          | .          | .         |          |          |
| 0 . | NA          | .  | GLUCOSE   | CYTOPLA:   | PHOSPHC    | KEGG_T_ . |          |          |
| 0 . | NA          | .  | .         | .          | .          | KEGG_INC. |          |          |
| 0 . | NA          | .  | DNA_MET   | NUCLEUS    | NUCLEOT    | KEGG_PU.  |          |          |
| 0   | Adrenal co  | NA | .         | REGULAT    | NUCLEOP    | NUCLEOT   | KEGG_MA  | PID_HDAC |
| 0   | Progressiv  | NA | .         | .          | .          | .         | .        |          |
| 0 . | NA          | .  | .         | CELL_FR/.  | .          | .         |          |          |
| 0   | Mental retz | NA | .         | .          | MEMBRAN    | CATION_T  | KEGG_MA. |          |
| 0   | {Diabetes r | NA | .         | BIOSYNT    | CYTOPLA:   | RNA_BIN   | .        |          |
| 0 . | NA          | .  | SYSTEM_   | ORGANEL.   | .          | .         |          |          |
| 0 . | NA          | .  | .         | .          | .          | .         |          |          |
| 0 . | NA          | .  | .         | .          | .          | .         |          |          |
| 0 . | NA          | .  | .         | .          | .          | .         |          |          |
| 0   | Acne inver  | NA | .         | GLYCOPR    | INTRINSIC. | KEGG_NC   | PID_NOTC |          |
| 0 . | NA          | .  | .         | .          | .          | .         |          |          |
| 0   | Mitochondi  | NA | .         | .          | .          | .         |          |          |
| 0 . | NA          | .  | SYSTEM_ . | ACTIN_BI . | .          | .         |          |          |
| 0 . | NA          | .  | SYSTEM_   | INTRINSIC  | TRANSME.   | .         |          |          |
| 0 . | NA          | .  | .         | .          | .          | .         |          |          |

|               |    |   |                 |           |           |
|---------------|----|---|-----------------|-----------|-----------|
| 0 .           | NA | . | .               | .         | KEGG_PU.  |
| 0 .           | NA | . | CELL_REC.       | .         | .         |
| 0 .           | NA | . | ISOPREN.        | OXIDOREI  | KEGG_RE.  |
| 0 .           | NA | . | .               | .         | .         |
| 0 .           | NA | . | .               | .         | .         |
| 0 .           | NA | . | .               | .         | .         |
| 0 .           | NA | . | .               | STRUCTU.  | PID_PLK1. |
| 0 .           | NA | . | .               | .         | .         |
| 0 .           | NA | . | .               | INTRINSIC | RECEPTO.  |
| 0 .           | NA | . | .               | .         | PID_CDC4  |
| 0 Leber conç  | NA | . | .               | .         | .         |
| 0 Myeloid let | NA | . | RNA_MET.        | RNA_POL.  | PID_SMAE  |
| 0 .           | NA | . | .               | .         | .         |
| 0 .           | NA | . | .               | .         | .         |
| 0 Knobloch s  | NA | . | SYSTEM_         | PROTEIN/. | PID_INTEC |
| 0 .           | NA | . | .               | .         | .         |
| 0 .           | NA | . | MULTICEL.       | .         | PID_SMAE  |
| 0 .           | NA | . | .               | .         | .         |
| 0 .           | NA | . | SIGNAL_T.       | RECEPTO.  | PID_ANGI  |
| 0 .           | NA | . | CELL_DE\CYTOPLA | ACID_AMI  | KEGG_UB   |
| 0 .           | NA | . | .               | .         | PID_CD40  |
| 0 .           | NA | . | .               | .         | .         |
| 0 .           | NA | . | NUCLEOP.        | KEGG_TIC. | .         |
| 0 .           | NA | . | .               | .         | .         |
| 0 .           | NA | . | .               | .         | .         |
| 0 Leiomyom:   | NA | . | .               | .         | KEGG_FO   |
| 0 .           | NA | . | .               | .         | PID_INTEC |
| 0 .           | NA | . | .               | .         | .         |
| 0 .           | NA | . | .               | .         | .         |
| 0 .           | NA | . | .               | .         | PID_BMPF  |

BIOCART/REACTOME\_PATHWAY

BIOCART/REACTOME\_COSTIMULATION\_BY\_THE\_CD28\_FAMILY;REACTOME\_CTLA4\_INHIBIT

REACTOME\_SIGNALING\_BY\_GPCR;REACTOME\_OLFACTORY\_SIGNALING\_PATHW

REACTOME\_METABOLISM\_OF\_AMINO\_ACIDS\_AND\_DERIVATIVES;REACTOME\_BR

BIOCART/REACTOME\_VEGF\_LIGAND\_RECEPTOR\_INTERACTIONS

BIOCART/REACTOME\_CELL\_CELL\_COMMUNICATION;REACTOME\_RESPONSE\_TO\_ELEVATE

REACTOME\_PROCESSING\_OF\_CAPPED\_INTRON\_CONTAINING\_PRE\_MRNA;REAC

BIOCART/.

REACTOME\_IMMUNE\_SYSTEM;REACTOME\_ADAPTIVE\_IMMUNE\_SYSTEM;REACTC

REACTOME\_EXTRACELLULAR\_MATRIX\_ORGANIZATION;REACTOME\_COLLAGEN\_  
REACTOME\_CYTOSOLIC\_TRNA\_AMINOACYLATION;REACTOME\_TRNA\_AMINOACY  
REACTOME\_SIGNALING\_BY\_RHO\_GTPASES;REACTOME\_DEVELOPMENTAL\_BIOL  
REACTOME\_SIGNALLING\_BY\_NGF;REACTOME\_SIGNALING\_BY\_ERBB4;REACTOM  
REACTOME\_IMMUNE\_SYSTEM;REACTOME\_ADAPTIVE\_IMMUNE\_SYSTEM;REACTC

REACTOME\_CS\_DS\_DEGRADATION;REACTOME\_CHONDROITIN\_SULFATE\_BIOSY  
REACTOME\_DIABETES\_PATHWAYS;REACTOME\_REGULATION\_OF\_INSULIN\_LIKE\_

REACTOME\_PROCESSING\_OF\_CAPPED\_INTRON\_CONTAINING\_PRE\_MRNA;REAC

BIOCART/REACTOME\_DEVELOPMENTAL\_BIOLOGY;REACTOME\_TCR\_SIGNALING;REACTOM

REACTOME\_G0\_AND\_EARLY\_G1;REACTOME\_CELL\_CYCLE;REACTOME\_CELL\_CY

BIOCART/REACTOME\_DEVELOPMENTAL\_BIOLOGY;REACTOME\_SIGNALING\_BY\_GPCR;REA  
.  
.  
.  
.  
REACTOME\_METABOLISM\_OF\_PROTEINS;REACTOME\_POST\_TRANSLATIONAL\_M  
.  
.  
.  
.  
.  
.  
.  
.  
REACTOME\_DEVELOPMENTAL\_BIOLOGY;REACTOME\_SIGNALING\_BY\_NODAL;RE  
.  
.  
.  
.  
BIOCART/REACTOME\_TRIF\_MEDIATED\_TLR3\_SIGNALING;REACTOME\_MAP\_KINASE\_ACTIV/  
REACTOME\_SIGNALING\_BY\_GPCR;REACTOME\_GPCR\_DOWNSTREAM\_SIGNALING  
.  
.  
.  
BIOCART/REACTOME\_SIGNALING\_BY\_SCF\_KIT;REACTOME\_GROWTH\_HORMONE\_RECEPT  
.  
.  
.  
.  
.  
.  
.  
BIOCART/.  
.  
.  
REACTOME\_DEVELOPMENTAL\_BIOLOGY;REACTOME\_AXON\_GUIDANCE;REACTO  
REACTOME\_DEVELOPMENTAL\_BIOLOGY;REACTOME\_AXON\_GUIDANCE;REACTO  
.  
.  
.  
REACTOME\_SYNTHESIS\_OF\_PIPS\_AT\_THE\_GOLGI\_MEMBRANE;REACTOME\_PHO  
.  
.  
.  
.  
.  
BIOCART/REACTOME\_APOPTOTIC\_CLEAVAGE\_OF\_CELLULAR\_PROTEINS;REACTOME\_SIGI  
.  
.  
.  
.  
.  
.  
.  
.  
BIOCART/.  
.  
.  
.  
.  
REACTOME\_GLYCOGEN\_BREAKDOWN\_GLYCOGENOLYSIS;REACTOME\_METABOI  
.  
.  
.  
.  
.  
.  
.  
BIOCART/REACTOME\_SIGNALING\_BY\_ERBB4;REACTOME\_SIGNALING\_BY\_ERBB2;REACTOM



BIOCART/REACTOME\_TRANSMISSION\_ACROSS\_CHEMICAL\_SYNAPSES;REACTOME\_NEURC  
REACTOME\_PTM\_GAMMA\_CARBOXYLATION\_HYPUSINE\_FORMATION\_AND\_ARYL

BIOCART/REACTOME\_SIGNALING\_BY\_RHO\_GTPASES;REACTOME\_SIGNALLING\_BY\_NGF;RI

REACTOME\_MEMBRANE\_TRAFFICKING;REACTOME\_TRANS\_GOLGI\_NETWORK\_V  
BIOCART/.

REACTOME\_DEVELOPMENTAL\_BIOLOGY;REACTOME\_AXON\_GUIDANCE;REACTOI  
REACTOME\_DEVELOPMENTAL\_BIOLOGY;REACTOME\_AXON\_GUIDANCE;REACTOI

REACTOME\_TRIF\_MEDIATED\_TLR3\_SIGNALING;REACTOME\_RIP\_MEDIATED\_NFKI

REACTOME\_MHC\_CLASS\_II\_ANTIGEN\_PRESENTATION;REACTOME\_IMMUNE\_SYS

REACTOME\_TRANSMISSION\_ACROSS\_CHEMICAL\_SYNAPSES;REACTOME\_NEURC

REACTOME\_AMINO\_ACID\_TRANSPORT\_ACROSS\_THE\_PLASMA\_MEMBRANE;REA

BIOCART/.

REACTOME\_MEMBRANE\_TRAFFICKING;REACTOME\_TRANS\_GOLGI\_NETWORK\_V

REACTOME\_TRIF\_MEDIATED\_TLR3\_SIGNALING;REACTOME\_TAK1\_ACTIVATES\_NI  
REACTOME\_TRIF\_MEDIATED\_TLR3\_SIGNALING;REACTOME\_TAK1\_ACTIVATES\_NI

REACTOME\_GENERIC\_TRANSCRIPTION\_PATHWAY

. REACTOME\_SIGNALING\_BY\_FGFR\_IN\_DISEASE;REACTOME\_SIGNALING\_BY\_FGFI  
. .  
. .  
. .  
. .  
. .  
. .  
. .  
. .  
. .  
BIOCART/REACTOME\_SIGNALING\_BY\_ERBB4;REACTOME\_DOWNREGULATION\_OF\_ERBB2\_  
. .  
BIOCART/REACTOME\_SIGNALING\_BY\_SCF\_KIT;REACTOME\_GROWTH\_HORMONE\_RECEPT  
. REACTOME\_NOTCH1\_INTRACELLULAR\_DOMAIN\_REGULATES\_TRANSCRIPTION;F  
. .  
. .  
. REACTOME\_DEVELOPMENTAL\_BIOLOGY;REACTOME\_NEURONAL\_SYSTEM;REAC  
. .  
. REACTOME\_TCA\_CYCLE\_AND\_RESPIRATORY\_ELECTRON\_TRANSPORT;REACTO  
. .  
. .  
BIOCART/REACTOME\_DEVELOPMENTAL\_BIOLOGY;REACTOME\_RESPONSE\_TO\_ELEVATED  
. .  
. .  
BIOCART/REACTOME\_SIGNALING\_BY\_GPCR;REACTOME\_CLASS\_B\_2\_SECRETIN\_FAMILY\_F  
BIOCART/REACTOME\_SIGNALING\_BY\_GPCR;REACTOME\_CLASS\_B\_2\_SECRETIN\_FAMILY\_F  
. .  
. REACTOME\_SIGNALING\_BY\_GPCR;REACTOME\_OLFACTORY\_SIGNALING\_PATHW  
. .  
. .  
. .  
. REACTOME\_MITOCHONDRIAL\_PROTEIN\_IMPORT;REACTOME\_METABOLISM\_OF\_  
. .  
. .  
. .  
. REACTOME\_TRANSMISSION\_ACROSS\_CHEMICAL\_SYNAPSES;REACTOME\_NEURC  
. .  
. .  
. REACTOME\_FACTORS\_INVOLVED\_IN\_MEGAKARYOCYTE\_DEVELOPMENT\_AND\_P  
. .  
. REACTOME\_EXTRACELLULAR\_MATRIX\_ORGANIZATION;REACTOME\_COLLAGEN\_  
. .  
. .  
. .  
. .  
. .  
. REACTOME\_INTERFERON\_ALPHA\_BETA\_SIGNALING;REACTOME\_INTERFERON\_S  
. .  
. .  
. REACTOME\_SIGNALING\_BY\_GPCR;REACTOME\_OLFACTORY\_SIGNALING\_PATHW

. .  
.  
. .  
. .  
. .  
.  
REACTOME\_O\_LINKED\_GLYCOSYLATION\_OF\_MUCINS;REACTOME\_TERMINATION  
. .  
REACTOME\_TRIGLYCERIDE\_BIOSYNTHESIS;REACTOME\_FATTY\_ACYL\_COA\_BIOS  
. .  
.  
. .  
. .  
. .  
. .  
REACTOME\_SIGNALLING\_BY\_NGF;REACTOME\_DAG\_AND\_IP3\_SIGNALING;REACT  
. .  
.  
. .  
. .  
. .  
. .  
REACTOME\_CELL\_SURFACE\_INTERACTIONS\_AT\_THE\_VASCULAR\_WALL;REACTC  
. .  
REACTOME\_O\_LINKED\_GLYCOSYLATION\_OF\_MUCINS;REACTOME\_METABOLISM  
. .  
BIOCART/REACTOME\_SIGNALING\_BY\_SCF\_KIT;REACTOME\_GROWTH\_HORMONE\_RECEPT  
. .  
.  
. .  
. .  
. .  
. .  
REACTOME\_O\_LINKED\_GLYCOSYLATION\_OF\_MUCINS;REACTOME\_TERMINATION  
. .  
.  
. .  
. .  
REACTOME\_DEVELOPMENTAL\_BIOLOGY;REACTOME\_AXON\_GUIDANCE;REACTO  
BIOCART/REACTOME\_TRANSLATION;REACTOME\_INSULIN\_RECEPTOR\_SIGNALLING\_CASC.  
. .  
.  
.  
. .  
.  
.  
.  
REACTOME\_PPARA\_ACTIVATES\_GENE\_EXPRESSION;REACTOME\_DIABETES\_PAT  
. .  
BIOCART/.  
. .  
REACTOME\_MITOCHONDRIAL\_TRNA\_AMINOACYLATION;REACTOME\_TRNA\_AMIN  
. .  
.  
.  
.  
BIOCART/REACTOME\_CELL\_CELL\_COMMUNICATION;REACTOME\_RESPONSE\_TO\_ELEVATE  
. .  
.  
.  
.  
.  
.  
REACTOME\_HOMOLOGOUS\_RECOMBINATION\_REPAIR\_OF\_REPLICATION\_INDEP  
. .

.  
. .  
REACTOME\_DEVELOPMENTAL\_BIOLOGY;REACTOME\_AXON\_GUIDANCE;REACTO

.  
. .  
REACTOME\_SIGNALING\_BY\_SCF\_KIT;REACTOME\_DEVELOPMENTAL\_BIOLOGY;RI

.  
. .  
REACTOME\_SIGNALLING\_BY\_NGF;REACTOME\_DAG\_AND\_IP3\_SIGNALING;REACT  
REACTOME\_CELL\_CELL\_COMMUNICATION;REACTOME\_ADHERENS\_JUNCTIONS\_

.  
. .  
REACTOME\_CELL\_SURFACE\_INTERACTIONS\_AT\_THE\_VASCULAR\_WALL;REACTO

.  
. .  
REACTOME\_NEURONAL\_SYSTEM;REACTOME\_VOLTAGE\_GATED\_POTASSIUM\_CH  
REACTOME\_DEVELOPMENTAL\_BIOLOGY;REACTOME\_AXON\_GUIDANCE;REACTO

.  
. .  
BIOCART/REACTOME\_SIGNALING\_BY\_SCF\_KIT;REACTOME\_GROWTH\_HORMONE\_RECEPT

.  
. .  
REACTOME\_STRIATED\_MUSCLE\_CONTRACTION;REACTOME\_MUSCLE\_CONTRAC

.  
. .  
REACTOME\_RNA\_POL\_II\_TRANSCRIPTION;REACTOME\_RNA\_POL\_II\_TRANSCRIPT

.  
. .  
BIOCART/REACTOME\_SIGNALING\_BY\_BMP;REACTOME\_DOWNREGULATION\_OF\_TGF\_BET/

BIOCART/REACTOME\_PROCESSING\_OF\_CAPPED\_INTRON\_CONTAINING\_PRE\_MRNA;REAC  
BIOCART/REACTOME\_IMMUNOREGULATORY\_INTERACTIONS\_BETWEEN\_A\_LYMPHOID\_AN

BIOCART/REACTOME\_IL\_7\_SIGNALING;REACTOME\_SIGNALING\_BY\_ILS;REACTOME\_IL\_3\_5

REACTOME\_IMMUNE\_SYSTEM;REACTOME\_ADAPTIVE\_IMMUNE\_SYSTEM;REACTC

REACTOME\_GENERIC\_TRANSCRIPTION\_PATHWAY

REACTOME\_METABOLISM\_OF\_NON\_CODING\_RNA;REACTOME\_PROCESSING\_OF

BIOCART/REACTOME\_APOPTOSIS;REACTOME\_INTRINSIC\_PATHWAY\_FOR\_APOPTOSIS  
REACTOME\_DEVELOPMENTAL\_BIOLOGY;REACTOME\_TRANSMISSION\_ACROSS\_C

REACTOME\_IMMUNOREGULATORY\_INTERACTIONS\_BETWEEN\_A\_LYMPHOID\_AN

BIOCART/REACTOME\_IMMUNE\_SYSTEM;REACTOME\_ADAPTIVE\_IMMUNE\_SYSTEM;REACTC

REACTOME\_BIOLOGICAL\_OXIDATIONS;REACTOME\_PHASE1\_FUNCTIONALIZATIO

REACTOME\_DEVELOPMENTAL\_BIOLOGY;REACTOME\_NEURONAL\_SYSTEM;REAC

REACTOME\_METABOLISM\_OF\_AMINO\_ACIDS\_AND\_DERIVATIVES

.  
. .  
BIOCART/REACTOME\_CELL\_CYCLE;REACTOME\_CELL\_CYCLE\_MITOTIC;REACTOME\_G1\_PH  
REACTOME\_PTM\_GAMMA\_CARBOXYLATION\_HYPUSINE\_FORMATION\_AND\_ARYL

.  
. .  
BIOCART/REACTOME\_SIGNALLING\_BY\_NGF;REACTOME\_TRIF\_MEDIATED\_TLR3\_SIGNALING  
REACTOME\_TRANSMEMBRANE\_TRANSPORT\_OF\_SMALL\_MOLECULES;REACTOM

.  
. .  
REACTOME\_TRANSMEMBRANE\_TRANSPORT\_OF\_SMALL\_MOLECULES;REACTOM  
REACTOME\_DEVELOPMENTAL\_BIOLOGY;REACTOME\_AXON\_GUIDANCE;REACTOI

.  
. .  
REACTOME\_EXTRACELLULAR\_MATRIX\_ORGANIZATION;REACTOME\_COLLAGEN\_

.  
. .  
REACTOME\_NEURONAL\_SYSTEM;REACTOME\_VOLTAGE\_GATED\_POTASSIUM\_CH

.  
. .  
BIOCART/.

.  
. .  
REACTOME\_PYRUVATE\_METABOLISM\_AND\_CITRIC\_ACID\_TCA\_CYCLE;REACTOM  
BIOCART/REACTOME\_PHOSPHOLIPID\_METABOLISM;REACTOME\_SYNTHESIS\_OF\_PIPS\_AT\_

.  
. .  
REACTOME\_ACTIVATION\_OF\_THE\_PRE\_REPLICATIVE\_COMPLEX;REACTOME\_CE  
BIOCART/REACTOME\_CELL\_CYCLE;REACTOME\_PRE\_NOTCH\_TRANSCRIPTION\_AND\_TRAN

.  
. .  
REACTOME\_TRANSMISSION\_ACROSS\_CHEMICAL\_SYNAPSES;REACTOME\_NEUR  
REACTOME\_DIABETES\_PATHWAYS

.  
. .  
REACTOME\_SIGNALLING\_BY\_NGF;REACTOME\_SIGNALING\_BY\_ERBB4;REACTOM

.  
. .  
. REACTOME\_METABOLISM\_OF\_STEROID\_HORMONES\_AND\_VITAMINS\_A\_AND\_D;I  
. .  
. .  
. .  
. .  
. .  
. .  
. .  
. REACTOME\_FACTORS\_INVOLVED\_IN\_MEGAKARYOCYTE\_DEVELOPMENT\_AND\_P  
. .  
. .  
. .  
. .  
. .  
. .  
. REACTOME\_CELL\_CYCLE;REACTOME\_CHROMOSOME\_MAINTENANCE;REACTOM  
. .  
. REACTOME\_CELL\_SURFACE\_INTERACTIONS\_AT\_THE\_VASCULAR\_WALL;REACTO  
BIOCART/REACTOME\_INNATE\_IMMUNE\_SYSTEM;REACTOME\_IMMUNE\_SYSTEM;REACTOMI  
. .  
. .  
. REACTOME\_GENERIC\_TRANSCRIPTION\_PATHWAY  
. .  
BIOCART/REACTOME\_EXTRACELLULAR\_MATRIX\_ORGANIZATION;REACTOME\_COLLAGEN\_  
. REACTOME\_FACTORS\_INVOLVED\_IN\_MEGAKARYOCYTE\_DEVELOPMENT\_AND\_P  
. .  
. REACTOME\_DEVELOPMENTAL\_BIOLOGY;REACTOME\_AXON\_GUIDANCE;REACTOI

ORY\_SIGNALING;REACTOME\_IMMUNE\_SYSTEM;REACTOME\_ADAPTIVE\_IMMUNE\_SYSTEM

AY;REACTOME\_GPCR\_DOWNSTREAM\_SIGNALING

ANCHORED\_CHAIN\_AMINO\_ACID\_CATABOLISM

ED\_PLATELET\_CYTOSOLIC\_CA2\_;REACTOME\_CELL\_EXTRACELLULAR\_MATRIX\_INTERACTIO

:TOME\_MRNA\_PROCESSING;REACTOME\_MRNA\_SPLICING

OME\_CLASS\_I\_MHC\_MEDIATED\_ANTIGEN\_PROCESSING\_PRESENTATION;REACTOME\_ANTIG

FORMATION

'LATION

OGY;REACTOME\_SIGNALING\_BY\_GPCR;REACTOME\_AXON\_GUIDANCE;REACTOME\_G\_ALPHA

E\_NUCLEAR\_SIGNALING\_BY\_ERBB4;REACTOME\_ACTIVATED\_NOTCH1\_TRANSMITS\_SIGNAL

OME\_CLASS\_I\_MHC\_MEDIATED\_ANTIGEN\_PROCESSING\_PRESENTATION;REACTOME\_ANTIG

NTHESIS;REACTOME\_CHONDROITIN\_SULFATE\_DERMATAN\_SULFATE\_METABOLISM;REACT

\_GROWTH\_FACTOR\_IGF\_ACTIVITY\_BY\_INSULIN\_LIKE\_GROWTH\_FACTOR\_BINDING\_PROTEI

:TOME\_MRNA\_PROCESSING;REACTOME\_MRNA\_SPLICING

IE\_PHOSPHORYLATION\_OF\_CD3\_AND\_TCR\_ZETA\_CHAINS;REACTOME\_AXON\_GUIDANCE;RI

CLE\_MITOTIC;REACTOME\_MITOTIC\_G1\_G1\_S\_PHASES



CTOME\_AXON\_GUIDANCE;REACTOME\_G\_ALPHA1213\_SIGNALLING\_EVENTS;REACTOME\_GF

ODIFICATION\_SYNTHESIS\_OF\_GPI\_ANCHORED\_PROTEINS;REACTOME\_POST\_TRANSLATIO

ACTOME\_SIGNALING\_BY\_BMP

ATION\_IN\_TLR\_CASCADE;REACTOME\_ACTIVATION\_OF\_THE\_AP1\_FAMILY\_OF\_TRANSCRIPTI  
3;REACTOME\_G\_ALPHA\_S\_SIGNALLING\_EVENTS;REACTOME\_CGMP\_EFFECTS;REACTOME\_

OR\_SIGNALING;REACTOME\_ANTIVIRAL\_MECHANISM\_BY\_IFN\_STIMULATED\_GENES;REACTC

ME\_SEMAPHORIN\_INTERACTIONS;REACTOME\_SEMA3A\_PLEXIN\_REPULSION\_SIGNALING\_B  
ME\_L1CAM\_INTERACTIONS

SPHOLIPID\_METABOLISM;REACTOME\_PI\_METABOLISM;REACTOME\_METABOLISM\_OF\_LIPID

VALLING\_BY\_NGF;REACTOME\_DAG\_AND\_IP3\_SIGNALING;REACTOME\_SIGNALING\_BY\_ERBB

\_ISM\_OF\_CARBOHYDRATES;REACTOME\_GLUCOSE\_METABOLISM

ME\_SIGNALING\_BY\_CONSTITUTIVELY\_ACTIVE\_EGFR;REACTOME\_GRB2\_EVENTS\_IN\_ERBB2

ONAL\_SYSTEM;REACTOME\_NEUROTRANSMITTER\_RECEPTOR\_BINDING\_AND\_DOWNSTREA  
SULFATASE\_ACTIVATION;REACTOME\_GLYCOSPHINGOLIPID\_METABOLISM;REACTOME\_PHC

EACTOME\_DEVELOPMENTAL\_BIOLOGY;REACTOME\_GASTRIN\_CREB\_SIGNALLING\_PATHWA

ESICLE\_BUDDING;REACTOME\_GOLGI\_ASSOCIATED\_VESICLE\_BIOGENESIS

ME\_NETRIN1\_SIGNALING  
ME\_NETRIN1\_SIGNALING

B\_ACTIVATION\_VIA\_DAI;REACTOME\_TAK1\_ACTIVATES\_NFKB\_BY\_PHOSPHORYLATION\_AND  
ITEM;REACTOME\_ADAPTIVE\_IMMUNE\_SYSTEM

ONAL\_SYSTEM;REACTOME\_NEUROTRANSMITTER\_RECEPTOR\_BINDING\_AND\_DOWNSTREA  
CTOME\_TRANSMEMBRANE\_TRANSPORT\_OF\_SMALL\_MOLECULES;REACTOME\_SLC\_MEDIA

ESICLE\_BUDDING;REACTOME\_GOLGI\_ASSOCIATED\_VESICLE\_BIOGENESIS

FKB\_BY\_PHOSPHORYLATION\_AND\_ACTIVATION\_OF\_IKKS\_COMPLEX;REACTOME\_MAP\_KIN/  
FKB\_BY\_PHOSPHORYLATION\_AND\_ACTIVATION\_OF\_IKKS\_COMPLEX;REACTOME\_MAP\_KIN/

R1\_MUTANTS;REACTOME\_SIGNALING\_BY\_FGFR1\_FUSION\_MUTANTS;REACTOME\_SIGNALIN

\_ERBB3\_SIGNALING;REACTOME\_SIGNALING\_BY\_ERBB2;REACTOME\_GRB2\_EVENTS\_IN\_ERB  
OR\_SIGNALING;REACTOME\_REGULATION\_OF\_KIT\_SIGNALING;REACTOME\_ANTIGEN\_ACTIV  
;EACTOME\_SIGNALING\_BY\_NOTCH1;REACTOME\_SIGNALING\_BY\_NOTCH

TOME\_AXON\_GUIDANCE;REACTOME\_L1CAM\_INTERACTIONS;REACTOME\_INTERACTION\_BE  
ME\_MITOCHONDRIAL\_PROTEIN\_IMPORT;REACTOME\_METABOLISM\_OF\_PROTEINS;REACTO

\_PLATELET\_CYTOSOLIC\_CA2\_;REACTOME\_INTEGRIN\_CELL\_SURFACE\_INTERACTIONS;REA

RECEPTORS;REACTOME\_GPCR\_LIGAND\_BINDING  
RECEPTORS;REACTOME\_GPCR\_LIGAND\_BINDING  
AY;REACTOME\_GPCR\_DOWNSTREAM\_SIGNALING

PROTEINS

ONAL\_SYSTEM;REACTOME\_NEUROTRANSMITTER\_RELEASE\_CYCLE;REACTOME\_GABA\_SYN

LATELET\_PRODUCTION;REACTOME\_HEMOSTASIS

FORMATION

;IGNALING;REACTOME\_IMMUNE\_SYSTEM;REACTOME\_CYTOKINE\_SIGNALING\_IN\_IMMUNE\_S

AY;REACTOME\_GPCR\_DOWNSTREAM\_SIGNALING

...\_OF\_O\_GLYCAN\_BIOSYNTHESIS;REACTOME\_METABOLISM\_OF\_PROTEINS;REACTOME\_PO...  
...SYNTHESIS;REACTOME\_METABOLISM\_OF\_LIPIDS\_AND\_LIPOPROTEINS;REACTOME\_FATTY\_...

...OME\_SIGNALING\_BY\_ERBB2;REACTOME\_SIGNALING\_BY\_EGFR\_IN\_CANCER;REACTOME\_N...

...OME\_INTEGRIN\_CELL\_SURFACE\_INTERACTIONS;REACTOME\_HEMOSTASIS

...\_OF\_PROTEINS;REACTOME\_POST\_TRANSLATIONAL\_PROTEIN\_MODIFICATION

...OR\_SIGNALING;REACTOME\_CELL\_CELL\_COMMUNICATION;REACTOME\_REGULATION\_OF\_K...

...\_OF\_O\_GLYCAN\_BIOSYNTHESIS;REACTOME\_METABOLISM\_OF\_PROTEINS;REACTOME\_PO...

...ME\_L1CAM\_INTERACTIONS;REACTOME\_INTERACTION\_BETWEEN\_L1\_AND\_ANKYRINS  
...ADE;REACTOME\_ACTIVATION\_OF\_THE\_MRNA\_UPON\_BINDING\_OF\_THE\_CAP\_BINDING\_COM...

...THWAYS;REACTOME\_PERK\_REGULATED\_GENE\_EXPRESSION;REACTOME\_ACTIVATION\_OF...

...OACYLATION

...ED\_PLATELET\_CYTOSOLIC\_CA2\_;REACTOME\_CELL\_EXTRACELLULAR\_MATRIX\_INTERACTIO...

...ENDENT\_DOUBLE\_STRAND\_BREAKS;REACTOME\_DOUBLE\_STRAND\_BREAK\_REPAIR;REACT...

ME\_MYOGENESIS;REACTOME\_NETRIN1\_SIGNALING

REACTOME\_AXON\_GUIDANCE;REACTOME\_CRMP5\_IN\_SEMA3A\_SIGNALING;REACTOME\_SEM

REACTOME\_SIGNALING\_BY\_ERBB2;REACTOME\_SIGNALING\_BY\_EGFR\_IN\_CANCER;REACTOME\_NG2  
CELL\_CELL\_INTERACTIONS;REACTOME\_CELL\_CELL\_JUNCTION\_ORGANIZATION;REACTOME\_CELL\_JUN

CTON\_BASIGIN\_INTERACTIONS;REACTOME\_AMINO\_ACID\_TRANSPORT\_ACROSS\_THE\_PLASMA

MEMBRANE\_CHANNELS;REACTOME\_POTASSIUM\_CHANNELS

REACTOME\_SEMA4D\_IN\_SEMAPHORIN\_SIGNALING;REACTOME\_SEMAPHORIN\_INTERACTIONS;REACTOME

REACTOME\_IL7R\_SIGNALING;REACTOME\_IL7\_SIGNALING;REACTOME\_SIGNALING\_BY\_ERBB4;REACTOME

ACTIVATION

REACTOME\_TRANSCRIPTION\_PRE\_INITIATION\_AND\_PROMOTER\_OPENING;REACTOME\_TRANSCRIPTION;REACTOME

REACTOME\_TGF\_ALPHA\_RECEPTOR\_SIGNALING;REACTOME\_SMAD2\_SMAD3\_SMAD4\_HETEROTRIMER\_REGULATION

;TOME\_RNA\_POL\_II\_TRANSCRIPTION;REACTOME\_MRNA\_CAPPING;REACTOME\_RNA\_POL\_II  
D\_A\_NON\_LYMPHOID\_CELL;REACTOME\_REGULATION\_OF\_COMPLEMENT\_CASCADE;REACT

\_AND\_GM-CSF\_SIGNALING;REACTOME\_IL\_RECEPTOR\_SHC\_SIGNALING;REACTOME\_IL\_2\_S

OME\_CLASS\_I\_MHC\_MEDIATED\_ANTIGEN\_PROCESSING\_PRESENTATION;REACTOME\_ANTIG

\_CAPPED\_INTRON\_CONTAINING\_PRE\_MRNA;REACTOME\_MRNA\_PROCESSING;REACTOME

CHEMICAL\_SYNAPSES;REACTOME\_NEURONAL\_SYSTEM;REACTOME\_NEUROTRANSMITTER

D\_A\_NON\_LYMPHOID\_CELL;REACTOME\_IMMUNE\_SYSTEM;REACTOME\_ADAPTIVE\_IMMUNE

OME\_CLASS\_I\_MHC\_MEDIATED\_ANTIGEN\_PROCESSING\_PRESENTATION;REACTOME\_ANTIG

N\_OF\_COMPOUNDS;REACTOME\_ETHANOL\_OXIDATION

TOME\_AXON\_GUIDANCE;REACTOME\_L1CAM\_INTERACTIONS;REACTOME\_INTERACTION\_BE

IASE;REACTOME\_G1\_S\_TRANSITION;REACTOME\_MITOTIC\_G1\_G1\_S\_PHASES;REACTOME\_I  
SULFATASE\_ACTIVATION;REACTOME\_GLYCOSPHINGOLIPID\_METABOLISM;REACTOME\_PHC

3;REACTOME\_NGF\_SIGNALLING\_VIA\_TRKA\_FROM\_THE\_PLASMA\_MEMBRANE;REACTOME\_N  
IE\_SLC\_MEDIATED\_TRANSMEMBRANE\_TRANSPORT;REACTOME\_TRANSPORT\_OF\_VITAMIN;

IE\_SLC\_MEDIATED\_TRANSMEMBRANE\_TRANSPORT;REACTOME\_TRANSPORT\_OF\_INORGAN  
ME\_OTHER\_SEMAPHORIN\_INTERACTIONS;REACTOME\_SEMAPHORIN\_INTERACTIONS

FORMATION

CHANNELS;REACTOME\_POTASSIUM\_CHANNELS

IE\_TCA\_CYCLE\_AND\_RESPIRATORY\_ELECTRON\_TRANSPORT;REACTOME\_REGULATION\_OF  
\_THE\_PLASMA\_MEMBRANE;REACTOME\_PI\_METABOLISM;REACTOME\_METABOLISM\_OF\_LIP  
LL\_CYCLE;REACTOME\_CELL\_CYCLE\_MITOTIC;REACTOME\_TRANSCRIPTION\_COUPLED\_NEF  
ISLATION;REACTOME\_PRE\_NOTCH\_EXPRESSION\_AND\_PROCESSING;REACTOME\_CELL\_CY

ONAL\_SYSTEM;REACTOME\_NEUROTRANSMITTER\_RECEPTOR\_BINDING\_AND\_DOWNSTREA

E\_NUCLEAR\_SIGNALING\_BY\_ERBB4;REACTOME\_ACTIVATED\_NOTCH1\_TRANSMITS\_SIGNAL

REACTOME\_METABOLISM\_OF\_LIPIDS\_AND\_LIPOPROTEINS

LATELET\_PRODUCTION;REACTOME\_HEMOSTASIS

E\_DEPOSITION\_OF\_NEW\_CENPA\_CONTAINING\_NUCLEOSOMES\_AT\_THE\_CENTROMERE

ME\_TIE2\_SIGNALING;REACTOME\_HEMOSTASIS

E\_NOD1\_2\_SIGNALING\_PATHWAY;REACTOME\_NUCLEOTIDE\_BINDING\_DOMAIN\_LEUCINE\_R

FORMATION

LATELET\_PRODUCTION;REACTOME\_HEMOSTASIS

ME\_NETRIN1\_SIGNALING



NS;REACTOME\_CELL\_JUNCTION\_ORGANIZATION;REACTOME\_NEPHRIN\_INTERACTIONS;RE

EN\_PROCESSING\_UBIQUITINATION\_PROTEASOME\_DEGRADATION

IA1213\_SIGNALLING\_EVENTS;REACTOME\_GPCR\_DOWNSTREAM\_SIGNALING;REACTOME\_SF  
\_TO\_THE\_NUCLEUS;REACTOME\_SIGNALING\_BY\_NOTCH4;REACTOME\_SIGNALING\_BY\_NOT  
EN\_PROCESSING\_UBIQUITINATION\_PROTEASOME\_DEGRADATION

OME\_HEPARAN\_SULFATE\_HEPARIN\_HS\_GAG\_METABOLISM;REACTOME\_GLYCOSAMINOGL  
NS\_IGFBPS

EACTOME\_SEMA4D\_IN\_SEMAPHORIN\_SIGNALING;REACTOME\_SEMAPHORIN\_INTERACTION

'CR\_DOWNSTREAM\_SIGNALING;REACTOME\_SEMA4D\_IN\_SEMAPHORIN\_SIGNALING;REACTO

NAL\_PROTEIN\_MODIFICATION;REACTOME\_SYNTHESIS\_OF\_GLYCOSYLPHOSPHATIDYLINOS

ION\_FACTORS;REACTOME\_MAPK\_TARGETS\_NUCLEAR\_EVENTS\_MEDIATED\_BY\_MAP\_KINASE;  
\_NITRIC\_OXIDE\_STIMULATES\_GUANYLATE\_CYCLASE;REACTOME\_PLATELET\_HOMEOSTASIS

OME\_SIGNALING\_BY\_FGFR\_IN\_DISEASE;REACTOME\_SIGNALING\_BY\_FGFR1\_MUTANTS;REA

Y\_INHIBITING\_INTEGRIN\_ADHESION

IS\_AND\_LIPOPROTEINS

2;REACTOME\_SIGNALING\_BY\_EGFR\_IN\_CANCER;REACTOME\_NGF\_SIGNALLING\_VIA\_TRKA

\_SIGNALING;REACTOME\_SIGNALING\_BY\_EGFR\_IN\_CANCER;REACTOME\_PI3K\_EVENTS\_IN\_I

...M\_TRANSMISSION\_IN\_THE\_POSTSYNAPTIC\_CELL;REACTOME\_TRAFFICKING\_OF\_AMPA\_RE  
...OSPHOLIPID\_METABOLISM;REACTOME\_THE\_ACTIVATION\_OF\_ARYLSULFATASES;REACTOME

...Y\_VIA\_PKC\_AND\_MAPK;REACTOME\_NRAGE\_SIGNALS\_DEATH\_THROUGH\_JNK;REACTOME\_

...ACTIVATION\_OF\_IKKS\_COMPLEX;REACTOME\_TRAF6\_MEDIATED\_NFKB\_ACTIVATION;REAC

...M\_TRANSMISSION\_IN\_THE\_POSTSYNAPTIC\_CELL;REACTOME\_ACTIVATION\_OF\_KAINATE\_F  
...TED\_TRANSMEMBRANE\_TRANSPORT;REACTOME\_TRANSPORT\_OF\_INORGANIC\_CATIONS\_

...ASE\_ACTIVATION\_IN\_TLR\_CASCADE;REACTOME\_JNK\_C\_JUN\_KINASES\_PHOSPHORYLATION  
...ASE\_ACTIVATION\_IN\_TLR\_CASCADE;REACTOME\_JNK\_C\_JUN\_KINASES\_PHOSPHORYLATION

IG\_BY\_FGFR\_MUTANTS

IB2\_SIGNALING;REACTOME\_PI3K\_EVENTS\_IN\_ERBB4\_SIGNALING;REACTOME\_SHC1\_EVENT

'ATES\_B\_CELL\_RECEPTOR\_LEADING\_TO\_GENERATION\_OF\_SECOND\_MESSENGERS;REACT

ETWEEN\_L1\_AND\_ANKYRINS;REACTOME\_VOLTAGE\_GATED\_POTASSIUM\_CHANNELS;REAC

ME\_RESPIRATORY\_ELECTRON\_TRANSPORT;REACTOME\_RESPIRATORY\_ELECTRON\_TRAN

ACTOME\_DIABETES\_PATHWAYS;REACTOME\_P130CAS\_LINKAGE\_TO\_MAPK\_SIGNALING\_FOF

NTHESIS\_RELEASE\_REUPTAKE\_AND\_DEGRADATION

SYSTEM

ST\_TRANSLATIONAL\_PROTEIN\_MODIFICATION  
ACID\_TRIACYLGLYCEROL\_AND\_KETONE\_BODY\_METABOLISM;REACTOME\_SYNTHESIS\_OF\_

3F\_SIGNALLING\_VIA\_TRKA\_FROM\_THE\_PLASMA\_MEMBRANE;REACTOME\_SIGNALING\_BY\_F

.IT\_SIGNALING;REACTOME\_CELL\_SURFACE\_INTERACTIONS\_AT\_THE\_VASCULAR\_WALL;RE/

ST\_TRANSLATIONAL\_PROTEIN\_MODIFICATION

MPLEX\_AND\_EIFS\_AND\_SUBSEQUENT\_BINDING\_TO\_43S;REACTOME\_METABOLISM\_OF\_PRC

\_CHAPERONES\_BY\_ATF6\_ALPHA;REACTOME\_ACTIVATION\_OF\_GENES\_BY\_ATF4;REACTOM

INS;REACTOME\_CELL\_JUNCTION\_ORGANIZATION;REACTOME\_NEPHRIN\_INTERACTIONS;RE

OME\_DNA\_REPAIR

A3A\_PAK\_DEPENDENT\_AXON\_REPULSION;REACTOME\_SEMAPHORIN\_INTERACTIONS;REAC

3F\_SIGNALLING\_VIA\_TRKA\_FROM\_THE\_PLASMA\_MEMBRANE;REACTOME\_SIGNALING\_BY\_F  
CTION\_ORGANIZATION

4A\_MEMBRANE;REACTOME\_TRANSMEMBRANE\_TRANSPORT\_OF\_SMALL\_MOLECULES;REAC

;TOME\_SEMA4D\_INDUCED\_CELL\_MIGRATION\_AND\_GROWTH\_CONE\_COLLAPSE

E\_PROLACTIN\_RECEPTOR\_SIGNALING;REACTOME\_NUCLEAR\_SIGNALING\_BY\_ERBB4;REAC

E\_RNA\_POL\_II\_PRE\_TRANSCRIPTION\_EVENTS;REACTOME\_HIV\_INFECTION;REACTOME\_HIV

S\_TRANSCRIPTION;REACTOME\_TGF\_BETA\_RECEPTOR\_SIGNALING\_ACTIVATES\_SMADS;RE

\_TRANSCRIPTION\_PRE\_INITIATION\_AND\_PROMOTER\_OPENING;REACTOME\_MRNA\_PROCE  
TOME\_SIGNALING\_BY\_GPCR;REACTOME\_PEPTIDE\_LIGAND\_BINDING\_RECEPTORS;REACTO

IGNALING;REACTOME\_IMMUNE\_SYSTEM;REACTOME\_CYTOKINE\_SIGNALING\_IN\_IMMUNE\_S

EN\_PROCESSING\_UBIQUITINATION\_PROTEASOME\_DEGRADATION

\_MRNA\_SPLICING;REACTOME\_MRNA\_SPLICING\_MINOR\_PATHWAY;REACTOME\_METABOLIS

\_RECEPTOR\_BINDING\_AND\_DOWNSTREAM\_TRANSMISSION\_IN\_THE\_POSTSYNAPTIC\_CELL

\_SYSTEM

EN\_PROCESSING\_UBIQUITINATION\_PROTEASOME\_DEGRADATION

BETWEEN\_L1\_AND\_ANKYRINS;REACTOME\_VOLTAGE\_GATED\_POTASSIUM\_CHANNELS;REAC

NHIBITION\_OF\_REPLICATION\_INITIATION\_OF\_DAMAGED\_DNA\_BY\_RB1\_E2F1;REACTOME\_E;  
OSPHOLIPID\_METABOLISM;REACTOME\_THE\_ACTIVATION\_OF\_ARYLSULFATASES;REACTOMI

NUCLEAR\_EVENTS\_KINASE\_AND\_TRANSCRIPTION\_FACTOR\_ACTIVATION;REACTOME\_ERK\_  
S\_NUCLEOSIDES\_AND\_RELATED\_MOLECULES

VIC\_CATIONS\_ANIONS\_AND\_AMINO\_ACIDS\_OLIGOPEPTIDES

F\_PYRUVATE\_DEHYDROGENASE\_PDH\_COMPLEX;REACTOME\_PYRUVATE\_METABOLISM  
IDS\_AND\_LIOPROTEINS  
R\_TC\_NER;REACTOME\_M\_G1\_TRANSITION;REACTOME\_G1\_S\_TRANSITION;REACTOME\_NUC  
CLE\_CHECKPOINTS;REACTOME\_P53\_DEPENDENT\_G1\_DNA\_DAMAGE\_RESPONSE;REACTO

M\_TRANSMISSION\_IN\_THE\_POSTSYNAPTIC\_CELL;REACTOME\_TRAFFICKING\_OF\_AMPA\_RE

\_TO\_THE\_NUCLEUS;REACTOME\_SIGNALING\_BY\_NOTCH4;REACTOME\_SIGNALING\_BY\_NOT



ICH\_REPEAT\_CONTAINING\_RECEPTOR\_NLR\_SIGNALING\_PATHWAYS

ACTOME\_HEMOSTASIS;REACTOME\_PLATELET\_ACTIVATION\_SIGNALING\_AND\_AGGREGATI

EMA4D\_IN\_SEMAPHORIN\_SIGNALING;REACTOME\_SEMAPHORIN\_INTERACTIONS;REACTOME  
CH2;REACTOME\_SIGNALING\_BY\_NOTCH1;REACTOME\_SIGNALING\_BY\_NOTCH3;REACTOME

YCAN\_METABOLISM;REACTOME\_A\_TETRASACCHARIDE\_LINKER\_SEQUENCE\_IS\_REQUIRED

S;REACTOME\_IMMUNE\_SYSTEM;REACTOME\_ADAPTIVE\_IMMUNE\_SYSTEM

OME\_SEMAPHORIN\_INTERACTIONS;REACTOME\_SEMA4D\_INDUCED\_CELL\_MIGRATION\_AND

ITOL\_GPI

SES;REACTOME\_CIRCADIAN\_CLOCK;REACTOME\_TRAF6\_MEDIATED\_INDUCTION\_OF\_NFKB\_3;REACTOME\_HEMOSTASIS

CTOME\_SIGNALING\_BY\_FGFR1\_FUSION\_MUTANTS;REACTOME\_SIGNALING\_BY\_FGFR\_MUT.

\_FROM\_THE\_PLASMA\_MEMBRANE;REACTOME\_SIGNALING\_BY\_FGFR\_IN\_DISEASE;REACTOI

ERBB2\_SIGNALING;REACTOME\_EGFR\_DOWNREGULATION;REACTOME\_GAB1\_SIGNALOSOM

CEPTORS;REACTOME\_RAS\_ACTIVATION\_UPON\_CA2\_INFUX\_THROUGH\_NMDA\_RECEPTOR  
E\_METABOLISM\_OF\_PROTEINS;REACTOME\_SPHINGOLIPID\_METABOLISM;REACTOME\_POST

CELL\_DEATH\_SIGNALLING\_VIA\_NRAGE\_NRIF\_AND\_NADE;REACTOME\_P75\_NTR\_RECEPTOR

REACTOME\_TRAF6\_MEDIATED\_INDUCION\_OF\_NFKB\_AND\_MAP\_KINASES\_UPON\_TLR7\_8\_OR\_9

RECEPTORS\_UPON\_Glutamate\_BINDING;REACTOME\_Ionotropic\_Activity\_of\_Kainate  
Receptors\_and\_Amino\_Acids\_Oligopeptides;REACTOME\_Amino\_Acid\_and\_Oligopeptide

REACTOME\_ACTIVATION\_MEDIATED\_BY\_ACTIVATED\_HUMAN\_TAK1;REACTOME\_ACTIVATED\_TAK1  
REACTOME\_ACTIVATION\_MEDIATED\_BY\_ACTIVATED\_HUMAN\_TAK1;REACTOME\_ACTIVATED\_TAK1

S\_IN\_ERBB4\_SIGNALING;REACTOME\_PI3K\_EVENTS\_IN\_ERBB2\_SIGNALING;REACTOME\_NUC  
TOME\_SIGNALING\_BY\_THE\_B\_CELL\_RECEPTOR\_BCR;REACTOME\_CELL\_SURFACE\_INTERAC

TOME\_POTASSIUM\_CHANNELS

SPORT\_ATP\_SYNTHESIS\_BY\_CHEMIOSMOTIC\_COUPLING\_AND\_HEAT\_PRODUCTION\_BY\_UI

3\_INTEGRINS;REACTOME\_GRB2\_SOS\_PROVIDES\_LINKAGE\_TO\_MAPK\_SIGNALING\_FOR\_INT

VERY\_LONG\_CHAIN\_FATTY\_ACYL\_COAS

GFR\_IN\_DISEASE;REACTOME\_GASTRIN\_CREB\_SIGNALLING\_PATHWAY\_VIA\_PKC\_AND\_MAF

ACTOME\_PECAM1\_INTERACTIONS;REACTOME\_PD1\_SIGNALING;REACTOME\_COSTIMULATIC

TEINS;REACTOME\_3\_UTR\_MEDIATED\_TRANSLATIONAL\_REGULATION;REACTOME\_DEADEN

E\_UNFOLDED\_PROTEIN\_RESPONSE;REACTOME\_ACTIVATION\_OF\_CHAPERONE\_GENES\_BY

ACTOME\_HEMOSTASIS;REACTOME\_PLATELET\_ACTIVATION\_SIGNALING\_AND\_AGGREGATI

;TOME\_SEMA3A\_PLEXIN\_REPULSION\_SIGNALING\_BY\_INHIBITING\_INTEGRIN\_ADHESION

;GFR\_IN\_DISEASE;REACTOME\_TRANSMISSION\_ACROSS\_CHEMICAL\_SYNAPSES;REACTOME

;TOME\_SLC\_MEDIATED\_TRANSMEMBRANE\_TRANSPORT;REACTOME\_TRANSPORT\_OF\_INO

;TOME\_SIGNALING\_BY\_FGFR\_IN\_DISEASE;REACTOME\_SIGNALING\_BY\_FGFR1\_MUTANTS;REACTOME

\_LIFE\_CYCLE;REACTOME\_LATE\_PHASE\_OF\_HIV\_LIFE\_CYCLE

;ACTOME\_TRANSCRIPTIONAL\_ACTIVITY\_OF\_SMAD2\_SMAD3\_SMAD4\_HETEROTRIMER;REACTOME

SSING;REACTOME\_MRNA\_SPLICING;REACTOME\_MRNA\_SPLICING\_MINOR\_PATHWAY;REACTOME\_CLASS\_A1\_RHODOPSIN\_LIKE\_RECEPTORS;REACTOME\_GPCR\_DOWNSTREAM\_SIGNALING

SYSTEM

M\_OF\_RNA

;REACTOME\_AXON\_GUIDANCE;REACTOME\_SEMA4D\_IN\_SEMAPHORIN\_SIGNALING;REACTOME\_POTASSIUM\_CHANNELS

REACTOME\_POTASSIUM\_CHANNELS



2F\_MEDIATED\_REGULATION\_OF\_DNA\_REPLICATION  
E\_METABOLISM\_OF\_PROTEINS;REACTOME\_SPHINGOLIPID\_METABOLISM;REACTOME\_POST

MAPK\_TARGETS;REACTOME\_MAP\_KINASE\_ACTIVATION\_IN\_TLR\_CASCADE;REACTOME\_MA

LEOTIDE\_EXCISION\_REPAIR;REACTOME\_REPAIR\_SYNTHESIS\_FOR\_GAP\_FILLING\_BY\_DNA  
ME\_AUTODEGRADATION\_OF\_THE\_E3\_UBIQUITIN\_LIGASE\_COP1;REACTOME\_FACTORS\_INV

CEPTORS

CH2;REACTOME\_SIGNALING\_BY\_NOTCH1;REACTOME\_SIGNALING\_BY\_NOTCH3;REACTOME



ON

SEMA4D\_INDUCED\_CELL\_MIGRATION\_AND\_GROWTH\_CONE\_COLLAPSE  
REGULATED\_PROTEOLYSIS\_OF\_P75NTR;REACTOME\_NRIF\_SIGNALS\_CELL\_DEATH\_FROM

FOR\_GAG\_SYNTHESIS;REACTOME\_METABOLISM\_OF\_CARBOHYDRATES

!\_GROWTH\_CONE\_COLLAPSE

\_AND\_MAP\_KINASES\_UPON\_TLR7\_8\_OR\_9\_ACTIVATION;REACTOME\_NFKB\_AND\_MAP\_KINASES

ANTS;REACTOME\_SIGNALING\_BY\_PDGF;REACTOME\_DOWNSTREAM\_SIGNAL\_TRANSDUCTION

ME\_GASTRIN\_CREB\_SIGNALLING\_PATHWAY\_VIA\_PKC\_AND\_MAPK;REACTOME\_SIGNALING

IE;REACTOME\_SHC1\_EVENTS\_IN\_EGFR\_SIGNALING;REACTOME\_RESPONSE\_TO\_ELEVATED

;REACTOME\_ACTIVATION\_OF\_NMDA\_RECEPTOR\_UPON\_Glutamate\_BINDING\_AND\_POST  
TRANSLATIONAL\_PROTEIN\_MODIFICATION;REACTOME\_METABOLISM\_OF\_LIPIDS\_AND\_LI

R\_MEDIATED\_SIGNALLING;REACTOME\_SIGNALING\_BY\_GPCR;REACTOME\_AXON\_GUIDANCE

\_ACTIVATION;REACTOME\_ADVANCED\_GLYCOSYLATION\_ENDPRODUCT\_RECEPTOR\_SIGNA

E\_RECEPTORS

DE\_SLC\_TRANSPORTERS

<1\_MEDIATES\_P38\_MAPK\_ACTIVATION;REACTOME\_SIGNALING\_BY\_ILS;REACTOME\_IL1\_SIG  
<1\_MEDIATES\_P38\_MAPK\_ACTIVATION;REACTOME\_SIGNALING\_BY\_ILS;REACTOME\_IL1\_SIG

CLEAR\_SIGNALING\_BY\_ERBB4

CTIONS\_AT\_THE\_VASCULAR\_WALL;REACTOME\_PLATELET\_ADHESION\_TO\_EXPOSED\_COLL

NCOUPLING\_PROTEINS\_

ERGRINS\_;REACTOME\_INTEGRIN\_ALPHAIIIB\_BETA3\_SIGNALING;REACTOME\_MUSCLE\_CON

PK;REACTOME\_SIGNALING\_BY\_GPCR;REACTOME\_OPIOID\_SIGNALLING;REACTOME\_CA\_DEI

ON\_BY\_THE\_CD28\_FAMILY;REACTOME\_SIGNALING\_BY\_ILS;REACTOME\_IL\_3\_5\_AND\_GM\_CS

NYLATION\_OF\_MRNA;REACTOME\_METABOLISM\_OF\_MRNA;REACTOME\_DEADENYLATION\_D

'\_ATF6\_ALPHA;REACTOME\_METABOLISM\_OF\_LIPIDS\_AND\_LIPOPROTEINS;REACTOME\_FAT

ON

REACTOME\_NEURONAL\_SYSTEM;REACTOME\_SIGNALING\_BY\_GPCR;REACTOME\_INTEGRATION\_OF\_E

CELLULAR\_ORGANIC\_CATIONS\_ANIONS\_AND\_AMINO\_ACIDS\_OLIGOPEPTIDES;REACTOME\_AMINO\_ACID

REACTOME\_SIGNALING\_BY\_FGFR1\_FUSION\_MUTANTS;REACTOME\_SIGNALING\_BY\_FGFR\_MU

REACTOME\_GENERIC\_TRANSCRIPTION\_PATHWAY;REACTOME\_SIGNALING\_BY\_TGF\_BETA\_REC



TOME\_TRANSCRIPTION;REACTOME\_FORMATION\_OF\_RNA\_POL\_II\_ELONGATION\_COMPLEX  
ING;REACTOME\_G\_ALPHA\_I\_SIGNALLING\_EVENTS;REACTOME\_GPCR\_LIGAND\_BINDING;RE/

OME\_SEMAPHORIN\_INTERACTIONS;REACTOME\_SEMA3A\_PLEXIN\_REPULSION\_SIGNALING\_E

Γ\_TRANSLATIONAL\_PROTEIN\_MODIFICATION;REACTOME\_METABOLISM\_OF\_LIPIDS\_AND\_LI

.PK\_TARGETS\_NUCLEAR\_EVENTS\_MEDIATED\_BY\_MAP\_KINASES;REACTOME\_TRAF6\_MEDIA

\_POL\_IN\_TC\_NER;REACTOME\_SYNTHESIS\_OF\_DNA;REACTOME\_MITOTIC\_G1\_G1\_S\_PHASE  
INVOLVED\_IN\_MEGAKARYOCYTE\_DEVELOPMENT\_AND\_PLATELET\_PRODUCTION;REACTOME\_

REGULATED\_PROTEOLYSIS\_OF\_P75NTR;REACTOME\_NRF1\_SIGNALS\_CELL\_DEATH\_FROM



\_THE\_NUCLEUS;REACTOME\_CELL\_DEATH\_SIGNALLING\_VIA\_NRAGE\_NRIF\_AND\_NADE;REA

SES\_ACTIVATION\_MEDIATED\_BY\_TLR4\_SIGNALING\_REPERTOIRE;REACTOME\_MYD88\_MAL\_

ON;REACTOME\_SIGNALING\_BY\_ILS;REACTOME\_REGULATION\_OF\_IFNG\_SIGNALING;REACT

\_BY\_GPCR;REACTOME\_OPIOID\_SIGNALLING;REACTOME\_CA\_DEPENDENT\_EVENTS;REACTC

)\_PLATELET\_CYTOSOLIC\_CA2\_;REACTOME\_HEMOSTASIS;REACTOME\_PLATELET\_ACTIVATI

SYNAPTIC\_EVENTS;REACTOME\_CREB\_PHOSPHORYLATION\_THROUGH\_THE\_ACTIVATION\_OF  
PROTEINS

;REACTOME\_G\_ALPHA\_Q\_SIGNALLING\_EVENTS;REACTOME\_G\_ALPHA1213\_SIGNALLING\_E'

LING;REACTOME\_NFKB\_AND\_MAP\_KINASES\_ACTIVATION\_MEDIATED\_BY\_TLR4\_SIGNALING

NALING;REACTOME\_TRAF6\_MEDIATED\_INDUCTION\_OF\_NFKB\_AND\_MAP\_KINASES\_UPON\_T  
NALING;REACTOME\_TRAF6\_MEDIATED\_INDUCTION\_OF\_NFKB\_AND\_MAP\_KINASES\_UPON\_T

.AGEN;REACTOME\_PECAM1\_INTERACTIONS;REACTOME\_GPVI\_MEDIATED\_ACTIVATION\_CA

TRACTION;REACTOME\_AXON\_GUIDANCE;REACTOME\_ACTIVATION\_OF\_CHAPERONE\_GENE

PENDENT\_EVENTS;REACTOME\_PLC\_BETA\_MEDIATED\_EVENTS;REACTOME\_SIGNALING\_BY.

F\_SIGNALING;REACTOME\_PLATELET\_HOMEOSTASIS;REACTOME\_PLATELET\_SENSITIZATIO

EPENDENT\_MRNA\_DECAY;REACTOME\_METABOLISM\_OF\_RNA;REACTOME\_PKB\_MEDIATED.

TY\_ACID\_TRIACYLGLYCEROL\_AND\_KETONE\_BODY\_METABOLISM



ENERGY\_METABOLISM;REACTOME\_OPIOID\_SIGNALLING;REACTOME\_CA\_DEPENDENT\_EVEN

\_AND\_OLIGOPEPTIDE\_SLC\_TRANSPORTERS;REACTOME\_HEMOSTASIS

JTANTS;REACTOME\_SIGNALING\_BY\_PDGF;REACTOME\_DOWNSTREAM\_SIGNAL\_TRANSDUC

EPTOR\_COMPLEX

;REACTOME\_ELONGATION\_ARREST\_AND\_RECOVERY;REACTOME\_RNA\_POL\_II\_PRE\_TRAN  
ACTOME\_INNATE\_IMMUNE\_SYSTEM;REACTOME\_IMMUNE\_SYSTEM;REACTOME\_COMPLEME

BY\_INHIBITING\_INTEGRIN\_ADHESION;REACTOME\_ACTIVATION\_OF\_NMDA\_RECEPTOR\_UPOI

POPROTEINS

ATED\_INDUCTION\_OF\_NFKB\_AND\_MAP\_KINASES\_UPON\_TLR7\_8\_OR\_9\_ACTIVATION;REACTI

S;REACTOME\_MITOTIC\_M\_M\_G1\_PHASES;REACTOME\_DNA\_REPAIR;REACTOME\_CHROMOS  
SIGNALING\_BY\_NOTCH;REACTOME\_APOPTOSIS;REACTOME\_HEMOSTASIS;REACTOME\_ACTI

\_THE\_NUCLEUS;REACTOME\_CELL\_DEATH\_SIGNALLING\_VIA\_NRAGE\_NRIF\_AND\_NADE;REA



CTOME\_P75\_NTR\_RECEPTOR\_MEDIATED\_SIGNALLING;REACTOME\_SIGNALING\_BY\_NOTCH

CASCADE\_INITIATED\_ON\_PLASMA\_MEMBRANE;REACTOME\_INNATE\_IMMUNE\_SYSTEM;REA

OME\_INTERFERON\_GAMMA\_SIGNALING;REACTOME\_INTERFERON\_ALPHA\_BETA\_SIGNALIN

OME\_PLC\_BETA\_MEDIATED\_EVENTS;REACTOME\_SIGNALING\_BY\_PDGF;REACTOME\_DOWN

ON\_SIGNALING\_AND\_AGGREGATION

DF\_RAS;REACTOME\_POST\_NMDA\_RECEPTOR\_ACTIVATION\_EVENTS;REACTOME\_UNBLOCK

VENTS;REACTOME\_GPCR\_DOWNSTREAM\_SIGNALING;REACTOME\_NETRIN1\_SIGNALING;RE

\_REPertoire;REACTOME\_RIG\_I\_MDA5\_MEDIATED\_INDUCTION\_OF\_IFN\_ALPHA\_BETA\_PAT

LR7\_8\_OR\_9\_ACTIVATION;REACTOME\_NFKB\_AND\_MAP\_KINASES\_ACTIVATION\_MEDIATED\_  
LR7\_8\_OR\_9\_ACTIVATION;REACTOME\_NFKB\_AND\_MAP\_KINASES\_ACTIVATION\_MEDIATED\_

SCADE;REACTOME\_CD28\_CO\_STIMULATION;REACTOME\_COSTIMULATION\_BY\_THE\_CD28\_F

S\_BY\_XBP1S;REACTOME\_UNFOLDED\_PROTEIN\_RESPONSE;REACTOME\_SEMAPHORIN\_INTI



\_PDGF;REACTOME\_DOWNSTREAM\_SIGNAL\_TRANSDUCTION;REACTOME\_G\_ALPHA\_Q\_SIGM

N\_BY\_LDL;REACTOME\_IL\_RECEPTOR\_SHC\_SIGNALING;REACTOME\_SIGNAL\_REGULATORY\_

\_EVENTS;REACTOME\_SIGNALING\_BY\_INSULIN\_RECEPTOR;REACTOME\_MTORC1\_MEDIATEE

ITS;REACTOME\_ADENYLATE\_CYCLASE\_ACTIVATING\_PATHWAY;REACTOME\_ADENYLATE\_C

CTION;REACTOME\_SIGNALING\_BY\_ILS;REACTOME\_IL\_3\_5\_AND\_GM-CSF\_SIGNALING;REACT

DESCRIPTION\_EVENTS;REACTOME\_INFLUENZA\_LIFE\_CYCLE;REACTOME\_INFLUENZA\_VIRAL\_  
ANT\_CASCADE;REACTOME\_ADAPTIVE\_IMMUNE\_SYSTEM;REACTOME\_INITIAL\_TRIGGERING\_

\_GLUTAMATE\_BINDING\_AND\_POSTSYNAPTIC\_EVENTS;REACTOME\_CREB\_PHOSPHORYLA

OME\_NFKB\_AND\_MAP\_KINASES\_ACTIVATION\_MEDIATED\_BY\_TLR4\_SIGNALING\_REPERTOIF

SOME\_MAINTENANCE;REACTOME\_GLOBAL\_GENOMIC\_NER\_GG\_NER;REACTOME\_DNA\_REP  
IVATION\_OF\_BH3\_ONLY\_PROTEINS;REACTOME\_INTRINSIC\_PATHWAY\_FOR\_APOPTOSIS

CTOME\_P75\_NTR\_RECEPTOR\_MEDIATED\_SIGNALLING;REACTOME\_SIGNALING\_BY\_NOTCH





CTOME\_ACTIVATED\_TLR4\_SIGNALLING;REACTOME\_IMMUNE\_SYSTEM;REACTOME\_TOLL\_R

G;REACTOME\_REGULATION\_OF\_IFNA\_SIGNALING;REACTOME\_INTERFERON\_SIGNALING;RE

STREAM\_SIGNAL\_TRANSDUCTION;REACTOME\_G\_ALPHA\_Q\_SIGNALLING\_EVENTS;REACTOM

ING\_OF\_NMDA\_RECEPTOR\_Glutamate\_BINDING\_AND\_ACTIVATION;REACTOME\_CREB\_P1

ACTOME\_DCC\_MEDIATED\_ATTRACTIVE\_SIGNALING

HWAYS;REACTOME\_MYD88\_MAL\_CASCADE\_INITIATED\_ON\_PLASMA\_MEMBRANE;REACTOM

\_BY\_TLR4\_SIGNALING\_REPERTOIRE;REACTOME\_MYD88\_MAL\_CASCADE\_INITIATED\_ON\_PL  
\_BY\_TLR4\_SIGNALING\_REPERTOIRE;REACTOME\_MYD88\_MAL\_CASCADE\_INITIATED\_ON\_PL



FAMILY;REACTOME\_CTLA4\_INHIBITORY\_SIGNALING;REACTOME\_SIGNALING\_BY\_ILS;REACTO

ER ACTIONS;REACTOME\_SEMA3A\_PLEXIN\_REPULSION\_SIGNALING\_BY\_INHIBITING\_INTEGR

WALLING\_EVENTS;REACTOME\_GPCR\_DOWNSTREAM\_SIGNALING;REACTOME\_DOWNSTREA

\_PROTEIN\_SIRP\_FAMILY\_INTERACTIONS;REACTOME\_REGULATION\_OF\_IFNG\_SIGNALING;RI

)\_SIGNALLING;REACTOME\_PI3K\_CASCADE

YCLASE\_INHIBITORY\_PATHWAY;REACTOME\_NEUROTRANSMITTER\_RECEPTOR\_BINDING\_A

OME\_IL\_2\_SIGNALING;REACTOME\_IMMUNE\_SYSTEM;REACTOME\_CYTOKINE\_SIGNALING\_II

\_RNA\_TRANSCRIPTION\_AND\_REPLICATION;REACTOME\_HIV\_INFECTION;REACTOME\_HIV\_LIF  
OF\_COMPLEMENT

TION\_THROUGH\_THE\_ACTIVATION\_OF\_RAS;REACTOME\_POST\_NMDA\_RECEPTOR\_ACTIVATION

RE;REACTOME\_MYD88\_MAL\_CASCADE\_INITIATED\_ON\_PLASMA\_MEMBRANE;REACTOME\_INI

LICATION;REACTOME\_TELOMERE\_MAINTENANCE;REACTOME\_EXTENSION\_OF\_TELOMERE;





ECEPTOR\_CASCADES

REACTOME\_IL\_6\_SIGNALING;REACTOME\_IMMUNE\_SYSTEM;REACTOME\_CYTOKINE\_SIGNALING

REACTOME\_GPCR\_DOWNSTREAM\_SIGNALING;REACTOME\_G\_ALPHA\_Z\_SIGNALLING\_EVENTS;REACTOME



-IOSPORYLATION\_THROUGH\_THE\_ACTIVATION\_OF\_CAMKII;REACTOME\_INTERFERON\_GA

ME\_INNATE\_IMMUNE\_SYSTEM;REACTOME\_ACTIVATED\_TLR4\_SIGNALLING;REACTOME\_IMMI

ASMA\_MEMBRANE;REACTOME\_INNATE\_IMMUNE\_SYSTEM;REACTOME\_ACTIVATED\_TLR4\_S  
ASMA\_MEMBRANE;REACTOME\_INNATE\_IMMUNE\_SYSTEM;REACTOME\_ACTIVATED\_TLR4\_S

OME\_REGULATION\_OF\_SIGNALING\_BY\_CBL;REACTOME\_IL\_3\_5\_AND\_GM-CSF\_SIGNALING;F

IN\_ADHESION;REACTOME\_SMOOTH\_MUSCLE\_CONTRACTION;REACTOME\_PLATELET\_AGGF

.M\_SIGNALING\_OF\_ACTIVATED\_FGFR;REACTOME\_PHOSPHOLIPASE\_C\_MEDIATED\_CASCAD

EACTOME\_INTERFERON\_GAMMA\_SIGNALING;REACTOME\_INTERFERON\_ALPHA\_BETA\_SIGN

END\_DOWNSTREAM\_TRANSMISSION\_IN\_THE\_POSTSYNAPTIC\_CELL;REACTOME\_PLC\_BETA

√\_IMMUNE\_SYSTEM

FE\_CYCLE;REACTOME\_ABORTIVE\_ELONGATION\_OF\_HIV1\_TRANSCRIPT\_IN\_THE\_ABSENCE\_

TION\_EVENTS

√ATE\_IMMUNE\_SYSTEM;REACTOME\_ACTIVATED\_TLR4\_SIGNALLING;REACTOME\_IMMUNE\_S

S;REACTOME\_S\_PHASE







WJG\_IN\_IMMUNE\_SYSTEM

REACTOME\_METABOLISM\_OF\_MRNA;REACTOME\_METABOLISM\_OF\_RNA;REACTOME\_DOWNSTR

MMA\_SIGNALING;REACTOME\_INTERFERON\_SIGNALING;REACTOME\_IMMUNE\_SYSTEM;REA

JNE\_SYSTEM;REACTOME\_TOLL\_RECEPTOR\_CASCADES

IGNALLING;REACTOME\_IMMUNE\_SYSTEM;REACTOME\_TOLL\_RECEPTOR\_CASCADES;REAC  
IGNALLING;REACTOME\_IMMUNE\_SYSTEM;REACTOME\_TOLL\_RECEPTOR\_CASCADES;REAC

REACTOME\_HEMOSTASIS;REACTOME\_IMMUNE\_SYSTEM;REACTOME\_ADAPTIVE\_IMMUNE\_S

REGATION\_PLUG\_FORMATION;REACTOME\_HEMOSTASIS;REACTOME\_PLATELET\_ACTIVATIC

REACTOME\_SIGNALING\_BY\_FGFR

REGULATION\_OF\_IFNA\_SIGNALING;REACTOME\_INTERFERON\_SIGNALING

\_MEDIATED\_EVENTS;REACTOME\_PKA\_MEDIATED\_PHOSPHORYLATION\_OF\_CREB;REACTOM

\_OF\_TAT;REACTOME\_FORMATION\_OF\_THE\_HIV1\_EARLY\_ELONGATION\_COMPLEX;REACTOI

SYSTEM;REACTOME\_TOLL\_RECEPTOR\_CASCADES







EAM\_SIGNALING\_OF\_ACTIVATED\_FGFR;REACTOME\_PHOSPHOLIPASE\_C\_MEDIATED\_CASC

CTOME\_CYTOKINE\_SIGNALING\_IN\_IMMUNE\_SYSTEM

ROME\_NOD1\_2\_SIGNALING\_PATHWAY;REACTOME\_CYTOKINE\_SIGNALING\_IN\_IMMUNE\_SYS  
ROME\_NOD1\_2\_SIGNALING\_PATHWAY;REACTOME\_CYTOKINE\_SIGNALING\_IN\_IMMUNE\_SYS

SYSTEM;REACTOME\_CYTOKINE\_SIGNALING\_IN\_IMMUNE\_SYSTEM;REACTOME\_PLATELET\_A

IN\_SIGNALING\_AND\_AGGREGATION

NG;REACTOME\_IL\_2\_SIGNALING;REACTOME\_HEMOSTASIS;REACTOME\_IMMUNE\_SYSTEM;R

ME\_TRANSMEMBRANE\_TRANSPORT\_OF\_SMALL\_MOLECULES;REACTOME\_GLCAGON\_SIGI

ME\_VIRAL\_MESSENGER\_RNA\_SYNTHESIS;REACTOME\_LATE\_PHASE\_OF\_HIV\_LIFE\_CYCLE









ADE;REACTOME\_EFFECTS\_OF\_PIP2\_HYDROLYSIS;REACTOME\_REGULATION\_OF\_MRNA\_ST

TEM;REACTOME\_NUCLEOTIDE\_BINDING\_DOMAIN\_LEUCINE\_RICH\_REPEAT\_CONTAINING\_R  
TEM;REACTOME\_NUCLEOTIDE\_BINDING\_DOMAIN\_LEUCINE\_RICH\_REPEAT\_CONTAINING\_R

CTIVATION\_SIGNALING\_AND\_AGGREGATION

EACTOME\_ADAPTIVE\_IMMUNE\_SYSTEM;REACTOME\_CYTOKINE\_SIGNALING\_IN\_IMMUNE\_S'

VALING\_IN\_METABOLIC\_REGULATION;REACTOME\_SIGNALING\_BY\_PDGF;REACTOME\_DOWI











ABILITY\_BY\_PROTEINS\_THAT\_BIND\_AU\_RICH\_ELEMENTS;REACTOME\_INTERFERON\_GAMM

ECEPTOR\_NLR\_SIGNALING\_PATHWAYS  
ECEPTOR\_NLR\_SIGNALING\_PATHWAYS



YSTEM

DOWNSTREAM\_SIGNAL\_TRANSDUCTION;REACTOME\_GPCR\_DOWNSTREAM\_SIGNALING;REACTC











1A\_SIGNALING;REACTOME\_INTERFERON\_SIGNALING;REACTOME\_APOPTOSIS;REACTOME\_I









ME\_G\_ALPHA\_I\_SIGNALLING\_EVENTS;REACTOME\_G\_ALPHA\_S\_SIGNALLING\_EVENTS;REAC









-HEMOSTASIS;REACTOME\_IMMUNE\_SYSTEM;REACTOME\_CYTOKINE\_S









CTOME\_G\_ALPHA\_Z\_SIGNALLING\_EVENTS;REACTOME\_DOWNSTREAM\_SIG
