# Supplementary material for: Genomic alterations caused by HPV integration in a cohort of Chinese endocervical adenocarcinomas
Source: PubMed Central journal article supplement (PMC8636260; doi:10.1038/s41417-020-00283-4), 2021-01-04
Supplement: 41417_2020_283_MOESM8_ESM.pdf [file 41417_2020_283_MOESM8_ESM.pdf]

**Supplementary Table 7**

**Detail of somatic SNV detected in each case by whole exome sequencing.**

| Patient | CHRO | POS  | ID        | REF | ALT | QUAL | FIL         | GeneNam   | Func      | Ger | Gen     | Ex | AAChar |
|---------|------|------|-----------|-----|-----|------|-------------|-----------|-----------|-----|---------|----|--------|
| ACa01   | 1    | #### | rs6264213 | T   | C   | .    | PA:LINC0100 | ncRNA_NR_ | .         | .   | .       | .  | .      |
| ACa01   | 1    | #### | rs8798212 | A   | G   | .    | PA:LINC0100 | ncRNA_NR_ | .         | .   | .       | .  | .      |
| ACa01   | 1    | #### | .         | C   | T   | .    | PA:HES4     | UTR3      | NM_NM_    | .   | .       | .  | .      |
| ACa01   | 1    | #### | rs2011489 | C   | T   | .    | PA:.        | intergen  | NM_dist=  | .   | .       | .  | .      |
| ACa01   | 1    | #### | rs7706792 | G   | A   | .    | PA:PTCHD2   | exonic    | NM_       | mis | PTCHD   | .  | .      |
| ACa01   | 1    | #### | .         | C   | T   | .    | PA:MTHFR    | intronic  | NM_       | .   | .       | .  | .      |
| ACa01   | 1    | #### | rs7573447 | A   | G   | .    | PA:PRAMEF2  | intronic  | NM_       | .   | .       | .  | .      |
| ACa01   | 1    | #### | .         | G   | T   | .    | PA:NBPF1    | intronic  | NM_       | .   | .       | .  | .      |
| ACa01   | 1    | #### | rs643011  | C   | G   | .    | PA:NBPF1    | intronic  | NM_       | .   | .       | .  | .      |
| ACa01   | 1    | #### | rs1891369 | T   | C   | .    | PA:.        | upstream  | NR_       | .   | .       | .  | .      |
| ACa01   | 1    | #### | rs7967920 | G   | A   | .    | PA:PAX7     | intronic  | NM_       | .   | .       | .  | .      |
| ACa01   | 1    | #### | .         | A   | C   | .    | PA:TAF12    | intronic  | NM_       | .   | .       | .  | .      |
| ACa01   | 1    | #### | rs3699237 | G   | A   | .    | PA:SF3A3    | intronic  | NM_       | .   | .       | .  | .      |
| ACa01   | 1    | #### | .         | G   | A   | .    | PA:.        | intergen  | NR_dist=  | .   | .       | .  | .      |
| ACa01   | 1    | #### | .         | A   | C   | .    | PA:CYP2J2   | intronic  | NM_       | .   | .       | .  | .      |
| ACa01   | 1    | #### | .         | G   | A   | .    | PA:CEPT1    | intronic  | NM_       | .   | .       | .  | .      |
| ACa01   | 1    | #### | .         | A   | T   | .    | PA:.        | intergen  | NR_dist=  | .   | .       | .  | .      |
| ACa01   | 1    | #### | rs1809861 | G   | A   | .    | PA:.        | intergen  | NOI_dist= | .   | .       | .  | .      |
| ACa01   | 1    | #### | rs3742168 | A   | C   | .    | PA:.        | intergen  | NR_dist=  | .   | .       | .  | .      |
| ACa01   | 1    | #### | rs1409433 | T   | C   | .    | PA:.        | intergen  | NR_dist=  | .   | .       | .  | .      |
| ACa01   | 1    | #### | rs7967822 | G   | A   | .    | PA:.        | ncRNA_NR_ | .         | .   | .       | .  | .      |
| ACa01   | 1    | #### | rs7763460 | C   | G   | .    | PA:.        | ncRNA_NR_ | .         | .   | .       | .  | .      |
| ACa01   | 1    | #### | .         | A   | T   | .    | PA:.        | intergen  | NR_dist=  | .   | .       | .  | .      |
| ACa01   | 1    | #### | rs1694653 | C   | G   | .    | PA:.        | intergen  | NR_dist=  | .   | .       | .  | .      |
| ACa01   | 1    | #### | rs1129555 | G   | A   | .    | PA:NBPF8,NE | intronic  | NM_       | .   | .       | .  | .      |
| ACa01   | 1    | #### | rs3732644 | C   | T   | .    | PA:NBPF8,NE | intronic  | NM_       | .   | .       | .  | .      |
| ACa01   | 1    | #### | .         | T   | C   | .    | PA:PDE4DIP  | exonic    | NM_       | mis | PDE4D   | .  | .      |
| ACa01   | 1    | #### | rs2691756 | T   | C   | .    | PA:NBPF9,NE | intronic  | NM_       | .   | .       | .  | .      |
| ACa01   | 1    | #### | .         | A   | G   | .    | PA:NBPF25P  | ncRNA_NR_ | .         | .   | .       | .  | .      |
| ACa01   | 1    | #### | .         | G   | T   | .    | PA:NBPF25P  | ncRNA_NR_ | .         | .   | .       | .  | .      |
| ACa01   | 1    | #### | .         | G   | A   | .    | PA:NBPF25P  | ncRNA_NR_ | .         | .   | .       | .  | .      |
| ACa01   | 1    | #### | rs1932337 | C   | T   | .    | PA:.        | intergen  | NR_dist=  | .   | .       | .  | .      |
| ACa01   | 1    | #### | .         | C   | G   | .    | PA:NBPF8    | intronic  | NM_       | .   | .       | .  | .      |
| ACa01   | 1    | #### | rs2837929 | G   | A   | .    | PA:NBPF8    | intronic  | NM_       | .   | .       | .  | .      |
| ACa01   | 1    | #### | rs2983273 | A   | C   | .    | PA:.        | intergen  | NR_dist=  | .   | .       | .  | .      |
| ACa01   | 1    | #### | rs3740307 | C   | T   | .    | PA:PGLYRP3  | exonic    | NM_       | syr | PGLYR   | .  | .      |
| ACa01   | 1    | #### | rs1674785 | C   | T   | .    | PA:.        | UTR3      | NM_NM_    | .   | .       | .  | .      |
| ACa01   | 1    | #### | rs1485348 | T   | G   | .    | PA:FCGR2B   | exonic    | NM_       | mis | FCGR2   | .  | .      |
| ACa01   | 1    | #### | rs7598068 | G   | A   | .    | PA:POU2F1   | exonic    | NM_       | mis | POU2F   | .  | .      |
| ACa01   | 1    | #### | .         | G   | T   | .    | PA:DIEXF    | intronic  | NM_       | .   | .       | .  | .      |
| ACa01   | 1    | #### | .         | A   | C   | .    | PA:LBR      | intronic  | NM_       | .   | .       | .  | .      |
| ACa01   | 1    | #### | .         | A   | C   | .    | PA:LOC10015 | ncRNA_NR_ | .         | .   | .       | .  | .      |
| ACa01   | 1    | #### | rs2006447 | A   | G   | .    | PA:CEP170   | exonic    | NM_       | syr | CEP170  | .  | .      |
| ACa01   | 1    | #### | rs3739868 | A   | G   | .    | PA:.        | upstream  | NM_       | .   | .       | .  | .      |
| ACa01   | 1    | #### | rs1782199 | G   | T   | .    | PA:.        | upstream  | NM_       | .   | .       | .  | .      |
| ACa01   | 2    | #### | rs3461159 | C   | A   | .    | PA:.        | intergen  | NR_dist=  | .   | .       | .  | .      |
| ACa01   | 2    | #### | rs8689209 | G   | A   | .    | PA:.        | intergen  | NOI_dist= | .   | .       | .  | .      |
| ACa01   | 2    | #### | .         | C   | T   | .    | PA:LOC65434 | ncRNA_NR_ | .         | .   | .       | .  | .      |
| ACa01   | 2    | #### | .         | A   | G   | .    | PA:IL1R1    | exonic    | NM_       | mis | IL1R1:M | .  | .      |
| ACa01   | 2    | #### | rs3877497 | T   | G   | .    | PA:FAM138B  | ncRNA_NR_ | .         | .   | .       | .  | .      |
| ACa01   | 2    | #### | rs1037863 | A   | G   | .    | PA:CNTNAP5  | intronic  | NM_       | .   | .       | .  | .      |

|       |   |      |           |   |   |   |             |            |            |             |
|-------|---|------|-----------|---|---|---|-------------|------------|------------|-------------|
| ACa01 | 2 | #### | rs1839843 | T | C | . | PA:POTEF    | exonic     | NM_.       | syr POTEF   |
| ACa01 | 2 | #### | .         | C | A | . | PA:POTEF    | exonic     | NM_.       | mis POTEF   |
| ACa01 | 2 | #### | .         | C | T | . | PA:MGAT5    | intronic   | NM_.       | .           |
| ACa01 | 2 | #### | .         | A | T | . | PA:ZEB2     | exonic     | NM_.       | mis ZEB2:N  |
| ACa01 | 2 | #### | .         | T | G | . | PA:CDCA7    | intronic   | NM_.       | .           |
| ACa01 | 2 | #### | .         | C | T | . | PA:MARS2    | exonic     | NM_.       | mis MARS2   |
| ACa01 | 2 | #### | .         | T | G | . | PA:PLEKHM3  | exonic     | NM_.       | mis PLEKHI  |
| ACa01 | 2 | #### | rs7812258 | C | T | . | PA:PTH2R    | intronic   | NM_.       | .           |
| ACa01 | 2 | #### | rs1010785 | C | T | . | PA:DNAJB2   | intronic   | NM_.       | .           |
| ACa01 | 2 | #### | rs7526847 | A | C | . | PA:.        | intergen   | NM_dist=.  | .           |
| ACa01 | 3 | #### | .         | T | G | . | PA:NR2C2    | intronic   | NM_.       | .           |
| ACa01 | 3 | #### | .         | T | G | . | PA:CAPN7    | intronic   | NM_.       | .           |
| ACa01 | 3 | #### | .         | C | G | . | PA:KAT2B    | exonic     | NM_.       | mis KAT2B:  |
| ACa01 | 3 | #### | .         | G | A | . | PA:PLCD1    | intronic   | NM_.       | .           |
| ACa01 | 3 | #### | rs1450320 | C | T | . | PA:SCN10A   | exonic     | NM_.       | mis SCN10,  |
| ACa01 | 3 | #### | rs1398610 | C | T | . | PA:SCN10A   | exonic     | NM_.       | mis SCN10,  |
| ACa01 | 3 | #### | .         | G | A | . | PA:PDZRN3   | exonic     | NM_.       | syr PDZRN   |
| ACa01 | 3 | #### | rs1126455 | G | T | . | PA:OR5H14   | exonic     | NM_.       | syr OR5H1-  |
| ACa01 | 3 | #### | .         | C | G | . | PA:NFKBIZ   | intronic   | NM_.       | .           |
| ACa01 | 3 | #### | rs7541975 | C | T | . | PA:NFKBIZ   | intronic   | NM_.       | .           |
| ACa01 | 3 | #### | rs3757741 | G | A | . | PA:IFT57    | exonic     | NM_.       | mis IFT57:N |
| ACa01 | 3 | #### | .         | C | T | . | PA:.        | intergen   | NR_dist=.  | .           |
| ACa01 | 3 | #### | rs6228513 | T | C | . | PA:.        | intergen   | NM_dist=.  | .           |
| ACa01 | 3 | #### | .         | C | T | . | PA:.        | intergen   | NM_dist=.  | .           |
| ACa01 | 4 | #### | rs4970287 | C | T | . | PA:.        | intergen   | NOI_dist=. | .           |
| ACa01 | 4 | #### | .         | T | G | . | PA:FAM175A  | intronic   | NM_.       | .           |
| ACa01 | 4 | #### | rs3764069 | C | T | . | PA:.        | intergen   | NR_dist=.  | .           |
| ACa01 | 4 | #### | rs7963572 | G | A | . | PA:.        | intergen   | NR_dist=.  | .           |
| ACa01 | 4 | #### | rs9542709 | C | T | . | PA:FREM3    | exonic     | NM_.       | mis FREM3   |
| ACa01 | 4 | #### | rs3721454 | C | T | . | PA:FAM198B  | intronic   | NM_.       | .           |
| ACa01 | 4 | #### | .         | C | T | . | PA:TRIML1   | exonic     | NM_.       | syr TRIML1  |
| ACa01 | 5 | #### | rs649883  | T | C | . | PA:ZDHHC11  | intronic   | NM_.       | .           |
| ACa01 | 5 | #### | rs1467072 | G | A | . | PA:SDHAP3   | ncRNA_NR_. | .          | .           |
| ACa01 | 5 | #### | .         | C | A | . | PA:.        | intergen   | NM_dist=.  | .           |
| ACa01 | 5 | #### | rs1500138 | A | G | . | PA:GUSBP1   | ncRNA_NR_. | .          | .           |
| ACa01 | 5 | #### | .         | T | G | . | PA:NUP155   | intronic   | NM_.       | .           |
| ACa01 | 5 | #### | rs7962294 | T | C | . | PA:NLN      | intronic   | NM_.       | .           |
| ACa01 | 5 | #### | .         | C | G | . | PA:LOC44108 | ncRNA_NR_. | .          | .           |
| ACa01 | 5 | #### | .         | A | G | . | PA:PPIP5K2  | intronic   | NM_.       | .           |
| ACa01 | 5 | #### | rs7609290 | C | T | . | PA:CAMK4    | exonic     | NM_.       | syr CAMK4   |
| ACa01 | 5 | #### | .         | C | T | . | PA:PPP2CA   | intronic   | NM_.       | .           |
| ACa01 | 5 | #### | rs7647428 | C | T | . | PA:PCDHGC   | exonic     | NM_.       | mis PCDHC   |
| ACa01 | 5 | #### | rs1407436 | A | C | . | PA:.        | intergen   | NR_dist=.  | .           |
| ACa01 | 5 | #### | rs7380674 | G | C | . | PA:.        | intergen   | NR_dist=.  | .           |
| ACa01 | 6 | #### | rs5568001 | G | A | . | PA:.        | intergen   | NM_dist=.  | .           |
| ACa01 | 6 | #### | rs3977792 | T | G | . | PA:GSTA1    | exonic     | NM_.       | mis GSTA1:  |
| ACa01 | 6 | #### | .         | T | C | . | PA:.        | intergen   | NM_dist=.  | .           |
| ACa01 | 6 | #### | .         | A | G | . | PA:PHIP     | exonic     | NM_.       | mis PHIP:N  |
| ACa01 | 6 | #### | rs9844362 | C | T | . | PA:.        | intergen   | NM_dist=.  | .           |
| ACa01 | 6 | #### | .         | T | A | . | PA:.        | intergen   | NM_dist=.  | .           |
| ACa01 | 6 | #### | rs9992807 | T | C | . | PA:PDSS2    | intronic   | NM_.       | .           |
| ACa01 | 6 | #### | .         | C | T | . | PA:ARMC2    | exonic     | NM_.       | mis ARMC2   |
| ACa01 | 6 | #### | rs7554849 | G | A | . | PA:SLC2A12  | exonic     | NM_.       | syr SLC2A'  |
| ACa01 | 6 | #### | .         | G | A | . | PA:UTRN     | intronic   | NM_.       | .           |

|       |    |      |           |   |   |   |             |            |            |             |
|-------|----|------|-----------|---|---|---|-------------|------------|------------|-------------|
| ACa01 | 6  | #### | rs7747387 | C | T | . | PA:ADGB     | exonic     | NM_.       | syr ADGB:1  |
| ACa01 | 6  | #### | rs1467177 | C | T | . | PA:RAET1L   | intronic   | NM_.       | .           |
| ACa01 | 7  | #### | .         | G | T | . | PA:EIF3B    | intronic   | NM_.       | .           |
| ACa01 | 7  | #### | rs7308136 | G | C | . | PA:SNX13    | intronic   | NM_.       | .           |
| ACa01 | 7  | #### | .         | G | A | . | PA:AEBP1    | intronic   | NM_.       | .           |
| ACa01 | 7  | #### | .         | C | T | . | PA:.        | intergen   | NM_dist=.  | .           |
| ACa01 | 7  | #### | rs7911953 | C | T | . | PA:.        | intergen   | NR_dist=.  | .           |
| ACa01 | 7  | #### | .         | G | C | . | PA:.        | intergen   | NR_dist=.  | .           |
| ACa01 | 7  | #### | .         | C | T | . | PA:.        | intergen   | NR_dist=.  | .           |
| ACa01 | 7  | #### | .         | A | C | . | PA:ZNF716   | exonic     | NM_.       | mi: ZNF716  |
| ACa01 | 7  | #### | rs4311554 | G | T | . | PA:.        | intergen   | NOI_dist=. | .           |
| ACa01 | 7  | #### | .         | G | T | . | PA:.        | intergen   | NR_dist=.  | .           |
| ACa01 | 7  | #### | .         | G | A | . | PA:.        | intergen   | NR_dist=.  | .           |
| ACa01 | 7  | #### | rs5467260 | G | A | . | PA:.        | intergen   | NR_dist=.  | .           |
| ACa01 | 7  | #### | .         | C | G | . | PA:.        | intergen   | NR_dist=.  | .           |
| ACa01 | 7  | #### | rs8688020 | G | A | . | PA:.        | intergen   | NR_dist=.  | .           |
| ACa01 | 7  | #### | rs8799757 | G | T | . | PA:GTF2IRD2 | intronic   | NM_.       | .           |
| ACa01 | 7  | #### | rs7686126 | G | A | . | PA:HEPACAM  | intronic   | NM_.       | .           |
| ACa01 | 7  | #### | rs3727203 | G | C | . | PA:POLR2J3  | intronic   | NM_.       | .           |
| ACa01 | 7  | #### | rs7809364 | G | A | . | PA:POT1     | exonic     | NM_.       | mi: POT1:N  |
| ACa01 | 7  | #### | .         | G | A | . | PA:SSMEM1   | exonic     | NM_.       | syr SSMEM   |
| ACa01 | 7  | #### | rs7754267 | A | G | . | PA:KMT2C    | exonic     | NM_.       | syr KMT2C   |
| ACa01 | 7  | #### | rs1499922 | C | T | . | PA:KMT2C    | exonic     | NM_.       | mi: KMT2C   |
| ACa01 | 7  | #### | .         | C | T | . | PA:KMT2C    | UTR5       | NM_NM_.    | .           |
| ACa01 | 7  | #### | rs1407758 | C | T | . | PA:.        | intergen   | NM_dist=.  | .           |
| ACa01 | 7  | #### | rs1482637 | T | C | . | PA:.        | intergen   | NM_dist=.  | .           |
| ACa01 | 8  | #### | .         | C | A | . | PA:.        | intergen   | NR_dist=.  | .           |
| ACa01 | 8  | #### | .         | A | G | . | PA:MTUS1    | intronic   | NM_.       | .           |
| ACa01 | 8  | #### | .         | A | C | . | PA:XPO7     | intronic   | NM_.       | .           |
| ACa01 | 8  | #### | .         | T | G | . | PA:KCTD9    | exonic     | NM_.       | mi: KCTD9   |
| ACa01 | 8  | #### | rs1813428 | G | A | . | PA:.        | intergen   | NM_dist=.  | .           |
| ACa01 | 8  | #### | rs2022368 | A | G | . | PA:.        | intergen   | NM_dist=.  | .           |
| ACa01 | 8  | #### | .         | T | C | . | PA:LOC39222 | ncRNA_NR_. | .          | .           |
| ACa01 | 8  | #### | rs1837720 | A | T | . | PA:IMPA1    | intronic   | NM_.       | .           |
| ACa01 | 9  | #### | rs1329860 | T | C | . | PA:CNTNAP3  | intronic   | NM_.       | .           |
| ACa01 | 9  | #### | rs2954515 | T | C | . | PA:.        | intergen   | NM_dist=.  | .           |
| ACa01 | 9  | #### | rs1968548 | C | A | . | PA:PTGER4P  | ncRNA_NR_. | .          | .           |
| ACa01 | 9  | #### | rs2019611 | G | A | . | PA:PTGER4P  | ncRNA_NR_. | .          | .           |
| ACa01 | 9  | #### | rs4928839 | A | C | . | PA:.        | intergen   | NM_dist=.  | .           |
| ACa01 | 9  | #### | .         | G | A | . | PA:WNK2     | intronic   | NM_.       | .           |
| ACa01 | 9  | #### | rs2868900 | G | A | . | PA:.        | intergen   | NM_dist=.  | .           |
| ACa01 | 9  | #### | .         | C | T | . | PA:ENG      | exonic     | NM_.       | syr ENG:NI  |
| ACa01 | 9  | #### | .         | T | G | . | PA:FNBP1    | exonic     | NM_.       | syr FNBP1:  |
| ACa01 | 9  | #### | .         | A | G | . | PA:ADAMTS1  | intronic   | NM_.       | .           |
| ACa01 | 9  | #### | rs7694907 | C | T | . | PA:DBH      | exonic     | NM_.       | syr DBH:NI  |
| ACa01 | 10 | #### | .         | G | A | . | PA:HSPA14   | exonic     | NM_.       | mi: HSPA14  |
| ACa01 | 10 | #### | rs1051909 | T | G | . | PA:NMT2     | intronic   | NM_.       | .           |
| ACa01 | 10 | #### | .         | C | T | . | PA:MYO3A    | exonic     | NM_.       | mi: MYO3A   |
| ACa01 | 10 | #### | .         | G | A | . | PA:MYO3A    | exonic     | NM_.       | mi: MYO3A   |
| ACa01 | 10 | #### | rs7531795 | G | A | . | PA:ARMC4    | exonic     | NM_.       | unl UNKNC   |
| ACa01 | 10 | #### | rs5566342 | C | T | . | PA:SVIL     | exonic     | NM_.       | syr SVIL:NI |
| ACa01 | 10 | #### | rs1759036 | G | T | . | PA:ANKRD30  | intronic   | NM_.       | .           |
| ACa01 | 10 | #### | .         | C | T | . | PA:.        | intergen   | NM_dist=.  | .           |
| ACa01 | 10 | #### | rs1494650 | A | C | . | PA:.        | intergen   | NR_dist=.  | .           |

|       |    |      |           |   |   |   |             |           |          |     |         |
|-------|----|------|-----------|---|---|---|-------------|-----------|----------|-----|---------|
| ACa01 | 10 | #### | rs5524339 | C | T | . | PA:ACTR3BP  | ncRNA_NR_ | .        | .   |         |
| ACa01 | 10 | #### | rs7827248 | T | A | . | PA:AGAP9    | intronic  | NM_      | .   | .       |
| ACa01 | 10 | #### | rs7821206 | C | T | . | PA:RBP3     | exonic    | NM_      | mis | RBP3:N  |
| ACa01 | 10 | #### | .         | C | A | . | PA:.        | intergen  | NM_dist= | .   | .       |
| ACa01 | 10 | #### | .         | C | T | . | PA:ATOH7    | exonic    | NM_      | syr | ATOH7   |
| ACa01 | 10 | #### | rs1810812 | C | T | . | PA:TET1     | exonic    | NM_      | syr | TET1:N  |
| ACa01 | 10 | #### | rs1852770 | G | A | . | PA:STOX1    | exonic    | NM_      | mis | STOX1   |
| ACa01 | 10 | #### | .         | G | T | . | PA:.        | upstream  | NM_      | .   | .       |
| ACa01 | 10 | #### | .         | A | C | . | PA:LIPA     | intronic  | NM_      | .   | .       |
| ACa01 | 10 | #### | rs9002476 | C | T | . | PA:.        | intergen  | NM_dist= | .   | .       |
| ACa01 | 10 | #### | .         | A | G | . | PA:COL17A1  | intronic  | NM_      | .   | .       |
| ACa01 | 10 | #### | rs1028763 | G | A | . | PA:TRUB1    | intronic  | NM_      | .   | .       |
| ACa01 | 11 | #### | .         | G | T | . | PA:.        | intergen  | NM_dist= | .   | .       |
| ACa01 | 11 | #### | rs7615769 | A | T | . | PA:METTL15  | intronic  | NM_      | .   | .       |
| ACa01 | 11 | #### | .         | G | A | . | PA:TRAF6    | intronic  | NM_      | .   | .       |
| ACa01 | 11 | #### | .         | T | G | . | PA:.        | intergen  | NM_dist= | .   | .       |
| ACa01 | 11 | #### | .         | G | A | . | PA:MS4A15   | intronic  | NM_      | .   | .       |
| ACa01 | 11 | #### | .         | T | A | . | PA:PRKRIR   | exonic    | NM_      | mis | PRKRIF  |
| ACa01 | 11 | #### | .         | T | G | . | PA:INTS4    | intronic  | NM_      | .   | .       |
| ACa01 | 11 | #### | .         | T | G | . | PA:INTS4    | intronic  | NM_      | .   | .       |
| ACa01 | 11 | #### | rs7614089 | C | T | . | PA:USP35    | exonic    | NM_      | syr | USP35:  |
| ACa01 | 11 | #### | rs1438612 | C | T | . | PA:HEPHL1   | exonic    | NM_      | mis | HEPHL   |
| ACa01 | 11 | #### | .         | G | T | . | PA:SIK2     | exonic    | NM_      | syr | SIK2:NI |
| ACa01 | 11 | #### | rs7757345 | C | T | . | PA:OR10S1   | exonic    | NM_      | mis | OR10S   |
| ACa01 | 11 | #### | rs2512286 | T | C | . | PA:.        | intergen  | NM_dist= | .   | .       |
| ACa01 | 12 | #### | rs5382343 | T | C | . | PA:.        | ncRNA_NR_ | .        | .   | .       |
| ACa01 | 12 | #### | rs8799828 | C | G | . | PA:LOC10028 | ncRNA_NR_ | .        | .   | .       |
| ACa01 | 12 | #### | .         | A | C | . | PA:SLC6A13  | exonic    | NM_      | mis | SLC6A'  |
| ACa01 | 12 | #### | rs8681434 | T | C | . | PA:ERC1     | UTR5      | NM_NM_   | .   | .       |
| ACa01 | 12 | #### | rs2575282 | A | G | . | PA:.        | intergen  | NM_dist= | .   | .       |
| ACa01 | 12 | #### | .         | G | A | . | PA:PDZRN4   | intronic  | NM_      | .   | .       |
| ACa01 | 12 | #### | .         | G | C | . | PA:SLC38A1  | UTR3      | NM_NM_   | .   | .       |
| ACa01 | 12 | #### | .         | C | T | . | PA:BIN2     | exonic    | NM_      | syr | BIN2:NI |
| ACa01 | 12 | #### | .         | A | C | . | PA:.        | intergen  | NR_dist= | .   | .       |
| ACa01 | 12 | #### | .         | G | A | . | PA:CAPS2    | intronic  | NM_      | .   | .       |
| ACa01 | 12 | #### | rs1043870 | C | T | . | PA:CHST11   | exonic    | NM_      | syr | CHST1   |
| ACa01 | 12 | #### | .         | C | T | . | PA:CCDC63   | intronic  | NM_      | .   | .       |
| ACa01 | 12 | #### | .         | C | T | . | PA:CIT      | intronic  | NM_      | .   | .       |
| ACa01 | 13 | #### | .         | C | A | . | PA:PCDH17   | exonic    | NM_      | mis | PCDH1   |
| ACa01 | 14 | #### | .         | G | A | . | PA:.        | intergen  | NR_dist= | .   | .       |
| ACa01 | 14 | #### | rs2014705 | C | T | . | PA:.        | intergen  | NR_dist= | .   | .       |
| ACa01 | 14 | #### | rs8794601 | G | A | . | PA:.        | intergen  | NR_dist= | .   | .       |
| ACa01 | 14 | #### | .         | C | T | . | PA:.        | intergen  | NR_dist= | .   | .       |
| ACa01 | 14 | #### | rs8674109 | G | T | . | PA:.        | intergen  | NM_dist= | .   | .       |
| ACa01 | 14 | #### | .         | C | T | . | PA:KLHL33   | exonic    | NM_      | mis | KLHL33  |
| ACa01 | 14 | #### | .         | A | C | . | PA:.        | intergen  | NM_dist= | .   | .       |
| ACa01 | 14 | #### | .         | A | C | . | PA:.        | intergen  | NM_dist= | .   | .       |
| ACa01 | 14 | #### | .         | G | A | . | PA:TRAPPC6  | intronic  | NM_      | .   | .       |
| ACa01 | 14 | #### | .         | G | A | . | PA:.        | upstream  | NM_      | .   | .       |
| ACa01 | 14 | #### | .         | T | G | . | PA:KIAA0586 | intronic  | NM_      | .   | .       |
| ACa01 | 14 | #### | rs7732738 | G | A | . | PA:SYNE2    | exonic    | NM_      | mis | SYNE2:  |
| ACa01 | 14 | #### | .         | G | T | . | PA:WDR25    | intronic  | NM_      | .   | .       |
| ACa01 | 14 | #### | rs2897118 | C | T | . | PA:.        | intergen  | NM_dist= | .   | .       |
| ACa01 | 14 | #### | rs3681255 | T | A | . | PA:.        | upstream  | NR_      | .   | .       |

|       |    |      |           |   |   |   |               |            |            |             |   |
|-------|----|------|-----------|---|---|---|---------------|------------|------------|-------------|---|
| ACa01 | 14 | #### | rs6199969 | T | C | . | PA:.          | intergen   | NR_dist=.  | .           |   |
| ACa01 | 15 | #### | .         | C | A | . | PA:.          | intergen   | NOI_dist=. | .           |   |
| ACa01 | 15 | #### | .         | T | G | . | PA:.          | intergen   | NOI_dist=. | .           |   |
| ACa01 | 15 | #### | rs3749240 | G | A | . | PA:.          | intergen   | NR_dist=.  | .           |   |
| ACa01 | 15 | #### | .         | C | T | . | PA:.          | intergen   | NR_dist=.  | .           |   |
| ACa01 | 15 | #### | .         | C | T | . | PA: CXADRP2   | ncRNA_NR_. | .          | .           |   |
| ACa01 | 15 | #### | .         | C | T | . | PA: GOLGA8L   | ncRNA_NR_. | .          | .           |   |
| ACa01 | 15 | #### | rs7964394 | T | C | . | PA: HERC2P2   | ncRNA_NR_. | .          | .           |   |
| ACa01 | 15 | #### | .         | A | G | . | PA:.          | intergen   | NR_dist=.  | .           |   |
| ACa01 | 15 | #### | rs7126232 | C | T | . | PA:.          | intronic   | NM_.       | .           | . |
| ACa01 | 15 | #### | .         | G | A | . | PA: NPAP1     | exonic     | NM_.       | syr NPAP1:  |   |
| ACa01 | 15 | #### | .         | G | A | . | PA: ATP10A    | exonic     | NM_.       | syr ATP10A: |   |
| ACa01 | 15 | #### | rs7695754 | C | T | . | PA: GOLGA8M   | exonic     | NM_.       | mis GOLGA   |   |
| ACa01 | 15 | #### | .         | G | A | . | PA: APBA2     | exonic     | NM_.       | mis APBA2:  |   |
| ACa01 | 15 | #### | .         | T | C | . | PA: ULK4P2, U | ncRNA_NR_. | .          | .           |   |
| ACa01 | 15 | #### | .         | C | A | . | PA:.          | intergen   | NR_dist=.  | .           |   |
| ACa01 | 15 | #### | rs8658676 | G | A | . | PA: GOLGA8C   | intronic   | NM_.       | .           | . |
| ACa01 | 15 | #### | .         | G | T | . | PA: GOLGA8C   | intronic   | NM_.       | .           | . |
| ACa01 | 15 | #### | rs3683923 | G | A | . | PA: DISP2     | UTR5       | NM_NM_.    | .           | . |
| ACa01 | 15 | #### | rs3741666 | G | A | . | PA: VPS13C    | intronic   | NM_.       | .           | . |
| ACa01 | 15 | #### | .         | C | T | . | PA:.          | intergen   | NM_dist=.  | .           | . |
| ACa01 | 15 | #### | rs5743805 | G | A | . | PA:.          | upstream   | NR_.       | .           | . |
| ACa01 | 15 | #### | rs1998088 | A | G | . | PA: GOLGA6L   | exonic     | NM_.       | syr GOLGA   |   |
| ACa01 | 15 | #### | rs3775649 | A | G | . | PA: GOLGA6L   | exonic     | NM_.       | mis GOLGA   |   |
| ACa01 | 15 | #### | rs6202866 | A | G | . | PA: WASH3P    | ncRNA_NR_. | .          | .           |   |
| ACa01 | 16 | #### | rs7561426 | G | A | . | PA: RGS11     | UTR3       | NM_NM_.    | .           | . |
| ACa01 | 16 | #### | .         | C | T | . | PA: OTOA      | intronic   | NM_.       | .           | . |
| ACa01 | 16 | #### | rs7464587 | C | T | . | PA: CORO1A    | exonic     | NM_.       | syr CORO1   |   |
| ACa01 | 16 | #### | .         | G | A | . | PA: ZNF646    | exonic     | NM_.       | syr ZNF646  |   |
| ACa01 | 16 | #### | rs2018870 | C | T | . | PA:.          | intergen   | NR_dist=.  | .           | . |
| ACa01 | 16 | #### | rs4643347 | T | C | . | PA:.          | intergen   | NOI_dist=. | .           | . |
| ACa01 | 16 | #### | rs4535017 | T | C | . | PA:.          | intergen   | NOI_dist=. | .           | . |
| ACa01 | 16 | #### | rs2128471 | T | C | . | PA:.          | intergen   | NOI_dist=. | .           | . |
| ACa01 | 16 | #### | rs2888787 | C | G | . | PA:.          | intergen   | NOI_dist=. | .           | . |
| ACa01 | 16 | #### | rs4355081 | T | A | . | PA:.          | intergen   | NOI_dist=. | .           | . |
| ACa01 | 16 | #### | rs4249097 | T | C | . | PA:.          | intergen   | NOI_dist=. | .           | . |
| ACa01 | 16 | #### | rs4232920 | C | T | . | PA:.          | intergen   | NOI_dist=. | .           | . |
| ACa01 | 16 | #### | rs7970299 | T | G | . | PA:.          | intergen   | NOI_dist=. | .           | . |
| ACa01 | 16 | #### | rs1483332 | A | T | . | PA:.          | intergen   | NOI_dist=. | .           | . |
| ACa01 | 16 | #### | rs9972801 | A | G | . | PA:.          | intergen   | NOI_dist=. | .           | . |
| ACa01 | 16 | #### | rs2878607 | A | T | . | PA:.          | intergen   | NOI_dist=. | .           | . |
| ACa01 | 16 | #### | rs4249050 | C | G | . | PA:.          | intergen   | NOI_dist=. | .           | . |
| ACa01 | 16 | #### | rs4250282 | T | C | . | PA:.          | intergen   | NOI_dist=. | .           | . |
| ACa01 | 16 | #### | rs7198709 | T | C | . | PA:.          | intergen   | NOI_dist=. | .           | . |
| ACa01 | 16 | #### | rs4445923 | A | T | . | PA:.          | intergen   | NOI_dist=. | .           | . |
| ACa01 | 16 | #### | rs4450416 | A | G | . | PA:.          | intergen   | NOI_dist=. | .           | . |
| ACa01 | 16 | #### | .         | G | A | . | PA:.          | intergen   | NOI_dist=. | .           | . |
| ACa01 | 16 | #### | rs8056404 | C | G | . | PA:.          | intergen   | NOI_dist=. | .           | . |
| ACa01 | 16 | #### | rs8056672 | A | C | . | PA:.          | intergen   | NOI_dist=. | .           | . |
| ACa01 | 16 | #### | rs6152895 | G | A | . | PA:.          | intergen   | NOI_dist=. | .           | . |
| ACa01 | 16 | #### | rs2884801 | T | C | . | PA:.          | intergen   | NOI_dist=. | .           | . |
| ACa01 | 16 | #### | .         | A | C | . | PA: FTO       | intronic   | NM_.       | .           | . |
| ACa01 | 16 | #### | .         | C | T | . | PA: CBFβ      | exonic     | NM_.       | sto CBFβ:N  |   |
| ACa01 | 16 | #### | .         | C | G | . | PA:.          | intergen   | NM_dist=.  | .           | . |

|       |    |      |           |   |   |   |             |           |           |     |        |
|-------|----|------|-----------|---|---|---|-------------|-----------|-----------|-----|--------|
| ACa01 | 16 | #### | .         | C | T | . | PA:ZNF469   | exonic    | NM_       | mi  | ZNF469 |
| ACa01 | 17 | #### | rs7801100 | G | A | . | PA:PRPF8    | exonic    | NM_       | syr | PRPF8: |
| ACa01 | 17 | #### | .         | T | C | . | PA:SPATA22  | exonic    | NM_       | mi  | SPATA: |
| ACa01 | 17 | #### | rs3687584 | G | A | . | PA:CHD3     | exonic    | NM_       | mi  | CHD3:M |
| ACa01 | 17 | #### | .         | A | C | . | PA:DNAH9    | intronic  | NM_       | .   | .      |
| ACa01 | 17 | #### | rs1845094 | C | T | . | PA:MEIS3P1  | ncRNA_NR_ | .         | .   | .      |
| ACa01 | 17 | #### | .         | G | A | . | PA:MYO15A   | intronic  | NM_       | .   | .      |
| ACa01 | 17 | #### | .         | G | T | . | PA:FLJ36000 | ncRNA_NR_ | .         | .   | .      |
| ACa01 | 17 | #### | .         | C | G | . | PA:FLJ36000 | ncRNA_NR_ | .         | .   | .      |
| ACa01 | 17 | #### | rs4503851 | G | T | . | PA:FLJ36000 | ncRNA_NR_ | .         | .   | .      |
| ACa01 | 17 | #### | rs1462263 | C | A | . | PA:.        | intergen  | NM_dist=  | .   | .      |
| ACa01 | 17 | #### | rs4362423 | T | G | . | PA:.        | intergen  | NM_dist=  | .   | .      |
| ACa01 | 17 | #### | rs6565430 | T | G | . | PA:.        | intergen  | NM_dist=  | .   | .      |
| ACa01 | 17 | #### | rs1434103 | G | A | . | PA:.        | intergen  | NM_dist=  | .   | .      |
| ACa01 | 17 | #### | .         | G | C | . | PA:.        | intergen  | NM_dist=  | .   | .      |
| ACa01 | 17 | #### | rs8916657 | T | A | . | PA:.        | intergen  | NM_dist=  | .   | .      |
| ACa01 | 17 | #### | rs1167082 | A | T | . | PA:FBXL20   | intronic  | NM_       | .   | .      |
| ACa01 | 17 | #### | .         | T | G | . | PA:CNP      | intronic  | NM_       | .   | .      |
| ACa01 | 17 | #### | rs1459625 | G | A | . | PA:TUBG1    | intronic  | NM_       | .   | .      |
| ACa01 | 17 | #### | rs1724395 | T | C | . | PA:.        | intergen  | NR_dist=  | .   | .      |
| ACa01 | 17 | #### | .         | G | A | . | PA:TEX14    | intronic  | NM_       | .   | .      |
| ACa01 | 17 | #### | .         | T | G | . | PA:FAM20A,F | intronic  | NM_       | .   | .      |
| ACa01 | 17 | #### | .         | A | C | . | PA:CD300LB  | intronic  | NM_       | .   | .      |
| ACa01 | 18 | #### | .         | C | T | . | PA:EPB41L3  | exonic    | NM_       | syr | EPB41L |
| ACa01 | 18 | #### | rs5374020 | T | C | . | PA:.        | intergen  | NM_dist=  | .   | .      |
| ACa01 | 18 | #### | rs2012257 | C | G | . | PA:.        | intergen  | NM_dist=  | .   | .      |
| ACa01 | 19 | #### | .         | G | A | . | PA:.        | intergen  | NM_dist=  | .   | .      |
| ACa01 | 19 | #### | rs7125437 | C | G | . | PA:.        | intergen  | NR_dist=  | .   | .      |
| ACa01 | 19 | #### | .         | C | T | . | PA:.        | intergen  | NR_dist=  | .   | .      |
| ACa01 | 19 | #### | .         | A | G | . | PA:CYP2F1   | intronic  | NM_       | .   | .      |
| ACa01 | 19 | #### | .         | G | T | . | PA:.        | intergen  | NR_dist=  | .   | .      |
| ACa01 | 19 | #### | .         | G | A | . | PA:POU2F2   | intronic  | NM_       | .   | .      |
| ACa01 | 19 | #### | .         | G | A | . | PA:CD177    | intronic  | NM_       | .   | .      |
| ACa01 | 19 | #### | .         | G | T | . | PA:DHDH     | intronic  | NM_       | .   | .      |
| ACa01 | 19 | #### | .         | G | A | . | PA:NLRP5    | exonic    | NM_       | mi  | NLRP5: |
| ACa01 | 19 | #### | rs8677343 | T | C | . | PA:.        | intergen  | NR_dist=  | .   | .      |
| ACa01 | 20 | #### | .         | G | A | . | PA:CNBD2    | intronic  | NM_       | .   | .      |
| ACa01 | 20 | #### | .         | C | T | . | PA:TGM2     | intronic  | NM_       | .   | .      |
| ACa01 | 21 | #### | rs8795581 | C | T | . | PA:.        | intergen  | NOI_dist= | .   | .      |
| ACa01 | 21 | #### | rs8661396 | G | A | . | PA:TEKT4P2  | ncRNA_NR_ | .         | .   | .      |
| ACa01 | 21 | #### | .         | G | T | . | PA:.        | intergen  | NR_dist=  | .   | .      |
| ACa01 | 21 | #### | rs7532385 | G | A | . | PA:BAGE2,B/ | intronic  | NM_       | .   | .      |
| ACa01 | 21 | #### | rs3737231 | A | T | . | PA:BAGE2,B/ | intronic  | NM_       | .   | .      |
| ACa01 | 21 | #### | .         | G | A | . | PA:.        | intergen  | NM_dist=  | .   | .      |
| ACa01 | 22 | #### | rs2003402 | C | A | . | PA:POTEH    | intronic  | NM_       | .   | .      |
| ACa01 | 22 | #### | rs2818474 | G | A | . | PA:.        | intergen  | NM_dist=  | .   | .      |
| ACa01 | 22 | #### | rs5464921 | C | T | . | PA:CECR2    | exonic    | NM_       | unl | UNKNC  |
| ACa01 | 22 | #### | rs9350299 | A | G | . | PA:GGT5     | intronic  | NM_       | .   | .      |
| ACa01 | 22 | #### | rs4050109 | C | G | . | PA:.        | intergen  | NM_dist=  | .   | .      |
| ACa01 | 22 | #### | .         | T | G | . | PA:.        | intergen  | NM_dist=  | .   | .      |
| ACa01 | 22 | #### | .         | A | C | . | PA:POM121L  | ncRNA_NR_ | .         | .   | .      |
| ACa01 | 22 | #### | .         | C | T | . | PA:MYO18B   | intronic  | NM_       | .   | .      |
| ACa01 | 22 | #### | .         | A | C | . | PA:THOC5    | intronic  | NM_       | .   | .      |
| ACa01 | 22 | #### | .         | G | A | . | PA:RNF215   | intronic  | NM_       | .   | .      |

|       |    |      |           |   |   |              |           |           |     |         |
|-------|----|------|-----------|---|---|--------------|-----------|-----------|-----|---------|
| ACa01 | 22 | #### | rs1425675 | C | T | PA:CYP2D7    | ncRNA_NR_ | .         | .   |         |
| ACa01 | 22 | #### | rs1054069 | G | A | PA:CELSR1    | intronic  | NM_       | .   | .       |
| ACa01 | 22 | #### | .         | G | A | PA:CELSR1    | intronic  | NM_       | .   | .       |
| ACa01 | X  | #### | rs7661994 | C | T | PA:VCX       | UTR5      | NM_NM_    | .   | .       |
| ACa01 | X  | #### | .         | C | T | PA:.         | intergen  | NM_dist=  | .   | .       |
| ACa01 | X  | #### | .         | T | C | PA:.         | intergen  | NM_dist=  | .   | .       |
| ACa01 | X  | #### | .         | G | A | PA:TFE3      | exonic    | NM_       | mis | TFE3:N  |
| ACa01 | X  | #### | .         | G | A | PA:TFE3      | intronic  | NM_       | .   | .       |
| ACa01 | X  | #### | .         | C | T | PA:CACNA1F   | intronic  | NM_       | .   | .       |
| ACa01 | X  | #### | rs7822715 | C | T | PA:.         | upstream  | NM_       | .   | .       |
| ACa01 | X  | #### | rs7821690 | C | T | PA:TSPYL2    | exonic    | NM_       | syr | TSPYL2  |
| ACa01 | X  | #### | .         | A | T | PA:.         | intergen  | NOI dist= | .   | .       |
| ACa01 | X  | #### | .         | T | G | PA:AR        | intronic  | NM_       | .   | .       |
| ACa01 | X  | #### | .         | C | T | PA:.         | downstr   | NM_       | .   | .       |
| ACa01 | X  | #### | .         | C | T | PA:BRWD3     | intronic  | NM_       | .   | .       |
| ACa01 | X  | #### | .         | C | T | PA:.         | intergen  | NM_dist=  | .   | .       |
| ACa01 | X  | #### | .         | G | A | PA:CSTF2     | exonic    | NM_       | syr | CSTF2:  |
| ACa01 | X  | #### | rs7818697 | G | A | PA:ZCCHC18   | exonic    | NM_       | mis | ZCCHC   |
| ACa01 | X  | #### | .         | C | T | PA:HS6ST2    | exonic    | NM_       | mis | HS6ST2: |
| ACa01 | X  | #### | .         | C | T | PA:MCF2      | exonic    | NM_       | mis | MCF2:N  |
| ACa01 | X  | #### | .         | C | T | PA:CD99L2    | intronic  | NM_       | .   | .       |
| ACa01 | MT | 7830 | rs8788971 | G | A | PA:.         | intergen  | NOI dist= | .   | .       |
| ACa02 | 1  | #### | .         | C | T | PA:MTOR      | exonic    | NM_       | mis | MTOR:I  |
| ACa02 | 1  | #### | .         | C | T | PA:MTOR      | exonic    | NM_       | mis | MTOR:I  |
| ACa02 | 1  | #### | rs5506852 | G | A | PA:.         | intergen  | NM_dist=  | .   | .       |
| ACa02 | 1  | #### | rs2994093 | G | A | PA:PRAMEF2   | UTR3      | NM_NM_    | .   | .       |
| ACa02 | 1  | #### | .         | C | T | PA:.         | intronic  | NM_       | .   | .       |
| ACa02 | 1  | #### | rs1390932 | C | T | PA:ESPSP     | ncRNA_NR_ | .         | .   | .       |
| ACa02 | 1  | #### | .         | A | C | PA:KIF17     | intronic  | NM_       | .   | .       |
| ACa02 | 1  | #### | rs3686746 | G | A | PA:ORC1      | exonic    | NM_       | syr | ORC1:N  |
| ACa02 | 1  | #### | .         | T | C | PA:LRRC40    | intronic  | NM_       | .   | .       |
| ACa02 | 1  | #### | .         | T | C | PA:ZNF644    | intronic  | NM_       | .   | .       |
| ACa02 | 1  | #### | .         | C | T | PA:KCNA2     | exonic    | NM_       | syr | KCNA2   |
| ACa02 | 1  | #### | rs2010827 | G | C | PA:.         | intergen  | NOI dist= | .   | .       |
| ACa02 | 1  | #### | .         | C | A | PA:.         | intergen  | NOI dist= | .   | .       |
| ACa02 | 1  | #### | rs2018849 | T | G | PA:.         | intergen  | NOI dist= | .   | .       |
| ACa02 | 1  | #### | rs3724010 | A | T | PA:.         | intergen  | NR_dist=  | .   | .       |
| ACa02 | 1  | #### | .         | T | C | PA:.         | intergen  | NR_dist=  | .   | .       |
| ACa02 | 1  | #### | rs3772379 | G | C | PA:.         | intergen  | NR_dist=  | .   | .       |
| ACa02 | 1  | #### | rs8799699 | G | A | PA:NBPF20    | intronic  | NM_       | .   | .       |
| ACa02 | 1  | #### | .         | C | A | PA:NBPF9,NE  | intronic  | NM_       | .   | .       |
| ACa02 | 1  | #### | .         | A | C | PA:NBPF8,NE  | intronic  | NM_       | .   | .       |
| ACa02 | 1  | #### | rs4649849 | A | G | PA:NBPF9,NE  | intronic  | NM_       | .   | .       |
| ACa02 | 1  | #### | rs8799650 | A | C | PA:NBPF25P   | ncRNA_NR_ | .         | .   | .       |
| ACa02 | 1  | #### | rs7668601 | C | G | PA:NBPF25P   | ncRNA_NR_ | .         | .   | .       |
| ACa02 | 1  | #### | rs7823737 | C | T | PA:NBPF25P   | ncRNA_NR_ | .         | .   | .       |
| ACa02 | 1  | #### | .         | C | T | PA:NBPF8     | intronic  | NM_       | .   | .       |
| ACa02 | 1  | #### | rs2003436 | G | A | PA:NBPF8     | intronic  | NM_       | .   | .       |
| ACa02 | 1  | #### | rs6181174 | G | A | PA:NBPF8     | intronic  | NM_       | .   | .       |
| ACa02 | 1  | #### | rs6181174 | G | A | PA:NBPF8     | intronic  | NM_       | .   | .       |
| ACa02 | 1  | #### | .         | A | C | PA:LOC100506 | ncRNA_NR_ | .         | .   | .       |
| ACa02 | 1  | #### | rs7494818 | C | T | PA:TNR       | exonic    | NM_       | mis | TNR:NM  |
| ACa02 | 1  | #### | .         | C | T | PA:SOAT1     | intronic  | NM_       | .   | .       |
| ACa02 | 1  | #### | rs8790889 | C | A | PA:AXDND1    | intronic  | NM_       | .   | .       |

|       |   |      |           |   |   |   |             |           |           |     |         |
|-------|---|------|-----------|---|---|---|-------------|-----------|-----------|-----|---------|
| ACa02 | 1 | #### | .         | G | T | . | PA:RNU5F-1  | ncRNA_NR_ | .         | .   |         |
| ACa02 | 1 | #### | .         | G | A | . | PA:ZNF678   | intronic  | NM_       | .   | .       |
| ACa02 | 1 | #### | .         | A | G | . | PA:.        | intergen  | NM_dist=  | .   | .       |
| ACa02 | 1 | #### | .         | C | A | . | PA:RGS7     | intronic  | NM_       | .   | .       |
| ACa02 | 2 | #### | .         | A | G | . | PA:NCOA1    | intronic  | NM_       | .   | .       |
| ACa02 | 2 | #### | rs1020943 | C | A | . | PA:.        | intergen  | NR_dist=  | .   | .       |
| ACa02 | 2 | #### | .         | C | T | . | PA:LOC65434 | ncRNA_NR_ | .         | .   |         |
| ACa02 | 2 | #### | rs2004118 | A | T | . | PA:.        | intergen  | NR_dist=  | .   | .       |
| ACa02 | 2 | #### | rs2021466 | A | T | . | PA:.        | intergen  | NR_dist=  | .   | .       |
| ACa02 | 2 | #### | rs3694799 | T | C | . | PA:ANKRD36  | intronic  | NM_       | .   | .       |
| ACa02 | 2 | #### | rs5416674 | G | A | . | PA:RGPD4    | exonic    | NM_       | miR | RGPD4   |
| ACa02 | 2 | #### | rs1053772 | A | C | . | PA:LIMS1    | intronic  | NM_       | .   | .       |
| ACa02 | 2 | #### | .         | C | T | . | PA:WASH2P   | ncRNA_NR_ | .         | .   |         |
| ACa02 | 2 | #### | rs5382277 | C | T | . | PA:RNU6-81F | ncRNA_NR_ | .         | .   |         |
| ACa02 | 2 | #### | .         | G | C | . | PA: 7-Mar   | intronic  | NM_       | .   | .       |
| ACa02 | 2 | #### | rs1875087 | G | A | . | PA:BBS5     | intronic  | NM_       | .   | .       |
| ACa02 | 2 | #### | .         | G | T | . | PA:TTN      | exonic    | NM_       | miR | TTN:NM  |
| ACa02 | 2 | #### | .         | A | G | . | PA:CARF     | intronic  | NM_       | .   | .       |
| ACa02 | 2 | #### | .         | T | C | . | PA:ATIC     | UTR3      | NM_NM_    | .   | .       |
| ACa02 | 2 | #### | rs1509794 | C | T | . | PA:COL4A4   | exonic    | NM_       | miR | COL4A-  |
| ACa02 | 2 | #### | .         | C | T | . | PA:NGEF     | exonic    | NM_       | miR | NGEF:↑  |
| ACa02 | 2 | #### | rs7970263 | T | C | . | PA:.        | intergen  | NR_dist=  | .   | .       |
| ACa02 | 3 | #### | .         | G | A | . | PA:ITPR1    | splicing  | NM_NM_    | .   | .       |
| ACa02 | 3 | #### | .         | G | A | . | PA:.        | UTR3      | NM_NM_    | .   | .       |
| ACa02 | 3 | #### | rs6777426 | G | C | . | PA:MST1     | exonic    | NM_       | miR | MST1:NM |
| ACa02 | 3 | #### | rs6779963 | G | A | . | PA:MST1     | intronic  | NM_       | .   | .       |
| ACa02 | 3 | #### | rs5472981 | G | A | . | PA:FRMD4B   | exonic    | NM_       | unl | UNKNC   |
| ACa02 | 3 | #### | .         | C | T | . | PA:MITF     | intronic  | NM_       | .   | .       |
| ACa02 | 3 | #### | .         | C | G | . | PA:.        | intergen  | NM_dist=  | .   | .       |
| ACa02 | 3 | #### | rs1219132 | G | A | . | PA:PIK3CA   | exonic    | NM_       | miR | PIK3CA  |
| ACa02 | 3 | #### | .         | C | G | . | PA:MFN1     | intronic  | NM_       | .   | .       |
| ACa02 | 3 | #### | .         | A | G | . | PA:GMNC     | exonic    | NM_       | syr | GMNC:   |
| ACa02 | 3 | #### | .         | G | T | . | PA:.        | ncRNA_NR_ | .         | .   | .       |
| ACa02 | 3 | #### | rs4857535 | A | G | . | PA:LOC22072 | ncRNA_NR_ | .         | .   | .       |
| ACa02 | 4 | #### | .         | C | T | . | PA:CTBP1    | intronic  | NM_       | .   | .       |
| ACa02 | 4 | #### | .         | G | T | . | PA:USP17L1  | exonic    | NM_       | miR | USP17L  |
| ACa02 | 4 | #### | .         | G | T | . | PA:.        | intergen  | NM_dist=  | .   | .       |
| ACa02 | 4 | #### | rs7961122 | C | G | . | PA:.        | upstream  | NM_       | .   | .       |
| ACa02 | 4 | #### | .         | C | T | . | PA:MIR1273f | ncRNA_NR_ | .         | .   | .       |
| ACa02 | 4 | #### | .         | A | G | . | PA:.        | intergen  | NM_dist=  | .   | .       |
| ACa02 | 4 | #### | .         | G | A | . | PA:.        | intergen  | NR_dist=  | .   | .       |
| ACa02 | 4 | #### | rs3705413 | C | T | . | PA:PRDM8    | exonic    | NM_       | syr | PRDM8   |
| ACa02 | 4 | #### | .         | C | T | . | PA:ADH1C    | exonic    | NM_       | unl | UNKNC   |
| ACa02 | 4 | #### | .         | T | C | . | PA:SLC9B2   | UTR3      | NM_NM_    | .   | .       |
| ACa02 | 4 | #### | .         | G | A | . | PA:ANK2     | intronic  | NM_       | .   | .       |
| ACa02 | 4 | #### | rs2016625 | T | G | . | PA:GYPB     | exonic    | NM_       | miR | GYPB:↑  |
| ACa02 | 4 | #### | .         | G | A | . | PA:WDR17    | intronic  | NM_       | .   | .       |
| ACa02 | 4 | #### | rs7619626 | C | T | . | PA:ZFP42    | exonic    | NM_       | syr | ZFP42:↑ |
| ACa02 | 5 | #### | rs8684061 | C | G | . | PA:LOC44213 | ncRNA_NR_ | .         | .   | .       |
| ACa02 | 5 | #### | .         | C | T | . | PA:OTULIN   | intronic  | NM_       | .   | .       |
| ACa02 | 5 | #### | .         | G | A | . | PA:.        | intergen  | NR_dist=  | .   | .       |
| ACa02 | 5 | #### | .         | G | A | . | PA:.        | intergen  | NR_dist=  | .   | .       |
| ACa02 | 5 | #### | rs8659304 | A | G | . | PA:.        | intergen  | NOI dist= | .   | .       |
| ACa02 | 5 | #### | rs1335780 | A | C | . | PA:.        | intergen  | NOI dist= | .   | .       |



|       |   |      |           |   |   |   |              |          |     |        |            |
|-------|---|------|-----------|---|---|---|--------------|----------|-----|--------|------------|
| ACa02 | 5 | #### | rs1483787 | G | C | . | PA:.         | intergen | NOI | dist=. | .          |
| ACa02 | 5 | #### | .         |   | C | A | PA:RGS7BP    | UTR5     | NM  | NM_.   | .          |
| ACa02 | 5 | #### | rs1416874 | T | G | . | PA:.         | intergen | NR  | dist=. | .          |
| ACa02 | 5 | #### | .         |   | G | A | PA:SH3TC2    | intronic | NM  | .      | .          |
| ACa02 | 5 | #### | rs7284112 | G | A | . | PA:DOCK2     | intronic | NM  | .      | .          |
| ACa02 | 5 | #### | rs1829546 | C | A | . | PA:MAML1     | intronic | NM  | .      | .          |
| ACa02 | 6 | #### | rs7743469 | A | G | . | PA:STK19     | exonic   | NM  | .      | syr STK19: |
| ACa02 | 6 | #### | rs1403232 | T | C | . | PA:CYP21A1   | ncRNA    | NR  | .      | .          |
| ACa02 | 6 | #### | rs7596914 | C | T | . | PA:KCNK17    | intronic | NM  | .      | .          |
| ACa02 | 6 | #### | rs4928651 | T | A | . | PA:.         | intergen | NR  | dist=. | .          |
| ACa02 | 6 | #### | .         |   | G | T | PA:DSE       | exonic   | NM  | .      | sto DSE:NM |
| ACa02 | 7 | #### | .         |   | A | C | PA:INTS1     | intronic | NM  | .      | .          |
| ACa02 | 7 | #### | rs7467237 | A | G | . | PA:NME8      | intronic | NM  | .      | .          |
| ACa02 | 7 | #### | rs7762925 | C | T | . | PA:NACAD     | exonic   | NM  | .      | mis NACAD  |
| ACa02 | 7 | #### | .         |   | G | T | PA:.         | intergen | NR  | dist=. | .          |
| ACa02 | 7 | #### | .         |   | A | G | PA:.         | intergen | NR  | dist=. | .          |
| ACa02 | 7 | #### | rs1422600 | C | T | . | PA:.         | intergen | NR  | dist=. | .          |
| ACa02 | 7 | #### | rs4460255 | G | C | . | PA:.         | intergen | NOI | dist=. | .          |
| ACa02 | 7 | #### | .         |   | C | A | PA:.         | intergen | NR  | dist=. | .          |
| ACa02 | 7 | #### | rs3740384 | G | A | . | PA:.         | intergen | NR  | dist=. | .          |
| ACa02 | 7 | #### | rs8672068 | G | A | . | PA:.         | intergen | NR  | dist=. | .          |
| ACa02 | 7 | #### | .         |   | C | G | PA:.         | intergen | NR  | dist=. | .          |
| ACa02 | 7 | #### | .         |   | G | A | PA:.         | intergen | NR  | dist=. | .          |
| ACa02 | 7 | #### | .         |   | G | T | PA:.         | intergen | NR  | dist=. | .          |
| ACa02 | 7 | #### | rs5541523 | C | T | . | PA:GTF2IP1,  | lncRNA   | NR  | .      | .          |
| ACa02 | 7 | #### | rs3757000 | T | C | . | PA:.         | intergen | NM  | dist=. | .          |
| ACa02 | 7 | #### | .         |   | A | G | PA:GPR85     | exonic   | NM  | .      | syr GPR85: |
| ACa02 | 7 | #### | .         |   | T | G | PA:SLC4A2    | intronic | NM  | .      | .          |
| ACa02 | 7 | #### | .         |   | T | G | PA:ABCF2     | intronic | NM  | .      | .          |
| ACa02 | 7 | #### | .         |   | T | G | PA:ABCF2     | intronic | NM  | .      | .          |
| ACa02 | 7 | #### | rs8681384 | G | C | . | PA:PTPRN2    | intronic | NM  | .      | .          |
| ACa02 | 8 | #### | .         |   | C | T | PA:.         | intergen | NM  | dist=. | .          |
| ACa02 | 8 | #### | rs3989791 | C | G | . | PA:.         | intergen | NR  | dist=. | .          |
| ACa02 | 8 | #### | .         |   | G | A | PA:.         | intergen | NR  | dist=. | .          |
| ACa02 | 8 | #### | rs7469289 | G | A | . | PA:RP1L1     | exonic   | NM  | .      | syr RP1L1: |
| ACa02 | 8 | #### | rs7595500 | C | G | . | PA:FAM90A2:  | ncRNA    | NR  | .      | .          |
| ACa02 | 8 | #### | .         |   | G | A | PA:MIR3926-: | ncRNA    | NR  | .      | .          |
| ACa02 | 8 | #### | .         |   | G | T | PA:VPS37A    | intronic | NM  | .      | .          |
| ACa02 | 8 | #### | .         |   | G | C | PA:.         | intergen | NOI | dist=. | .          |
| ACa02 | 8 | #### | rs4440644 | C | T | . | PA:.         | intergen | NOI | dist=. | .          |
| ACa02 | 8 | #### | .         |   | G | T | PA:ZNF704    | intronic | NM  | .      | .          |
| ACa02 | 8 | #### | .         |   | G | A | PA:CSMD3     | intronic | NM  | .      | .          |
| ACa02 | 8 | #### | .         |   | C | T | PA:LY6H      | intronic | NM  | .      | .          |
| ACa02 | 9 | #### | rs5356927 | G | A | . | PA:SLC24A2   | intronic | NM  | .      | .          |
| ACa02 | 9 | #### | rs5620843 | C | T | . | PA:PAX5      | intronic | NM  | .      | .          |
| ACa02 | 9 | #### | rs1412360 | T | C | . | PA:CNTNAP3   | exonic   | NM  | .      | mis CNTNA  |
| ACa02 | 9 | #### | rs3755065 | C | A | . | PA:GLIDR     | ncRNA    | NR  | .      | .          |
| ACa02 | 9 | #### | rs5368523 | T | A | . | PA:.         | upstream | NR  | .      | .          |
| ACa02 | 9 | #### | rs7792676 | G | T | . | PA:PTGER4P   | ncRNA    | NR  | .      | .          |
| ACa02 | 9 | #### | rs1968548 | C | A | . | PA:PTGER4P   | ncRNA    | NR  | .      | .          |
| ACa02 | 9 | #### | rs6254382 | A | G | . | PA:LOC6422:  | ncRNA    | NR  | .      | .          |
| ACa02 | 9 | #### | .         |   | G | T | PA:.         | intergen | NR  | dist=. | .          |
| ACa02 | 9 | #### | rs5781745 | G | A | . | PA:.         | intergen | NM  | dist=. | .          |
| ACa02 | 9 | #### | .         |   | G | A | PA:RALGDS    | intronic | NM  | .      | .          |

|       |    |      |           |   |   |   |             |            |           |     |         |
|-------|----|------|-----------|---|---|---|-------------|------------|-----------|-----|---------|
| ACa02 | 9  | #### | .         | G | A | . | PA:CACNA1E  | exonic     | NM_.      | mis | CACNA   |
| ACa02 | 10 | #### | rs7660547 | C | T | . | PA:CUBN     | exonic     | NM_.      | syr | CUBN:f  |
| ACa02 | 10 | #### | rs1930137 | C | T | . | PA:MLLT10   | intronic   | NM_.      | .   | .       |
| ACa02 | 10 | #### | .         | T | G | . | PA:BMS1     | splicing   | NM_NM_.   | .   | .       |
| ACa02 | 10 | #### | rs7819664 | T | A | . | PA:FAM35DP  | ncRNA_NR_. | .         | .   | .       |
| ACa02 | 10 | #### | rs6185008 | G | C | . | PA:TIMM23B, | intronic   | NM_.      | .   | .       |
| ACa02 | 10 | #### | .         | T | A | . | PA:AGAP5    | intronic   | NM_.      | .   | .       |
| ACa02 | 10 | #### | .         | G | A | . | PA:.        | intergen   | NR_dist=. | .   | .       |
| ACa02 | 10 | #### | .         | C | T | . | PA:PKD2L1   | intronic   | NM_.      | .   | .       |
| ACa02 | 10 | #### | rs2928119 | C | G | . | PA:RAB11FIF | intronic   | NM_.      | .   | .       |
| ACa02 | 10 | #### | .         | C | G | . | PA:.        | intergen   | NR_dist=. | .   | .       |
| ACa02 | 10 | #### | rs1021891 | C | T | . | PA:SCART1   | ncRNA_NR_. | .         | .   | .       |
| ACa02 | 11 | #### | rs6263724 | A | C | . | PA:MUC2     | exonic     | NM_.      | syr | MUC2:f  |
| ACa02 | 11 | #### | rs1494932 | T | C | . | PA:MUC5B    | intronic   | NM_.      | .   | .       |
| ACa02 | 11 | #### | .         | T | G | . | PA:ST5      | intronic   | NM_.      | .   | .       |
| ACa02 | 11 | #### | .         | G | A | . | PA:IPO7     | intronic   | NM_.      | .   | .       |
| ACa02 | 11 | #### | .         | G | A | . | PA:EXT2     | intronic   | NM_.      | .   | .       |
| ACa02 | 11 | #### | .         | G | A | . | PA:SYT7     | intronic   | NM_.      | .   | .       |
| ACa02 | 11 | #### | rs9265024 | G | C | . | PA:VEGFB    | UTR3       | NM_NM_.   | .   | .       |
| ACa02 | 11 | #### | .         | T | C | . | PA:SYVN1    | intronic   | NM_.      | .   | .       |
| ACa02 | 11 | #### | .         | C | T | . | PA:KLC2     | UTR3       | NM_NM_.   | .   | .       |
| ACa02 | 11 | #### | .         | G | A | . | PA:LOC10013 | ncRNA_NR_. | .         | .   | .       |
| ACa02 | 11 | #### | rs3679844 | G | A | . | PA:ARAP1    | exonic     | NM_.      | syr | ARAP1:  |
| ACa02 | 11 | #### | .         | G | A | . | PA:ARAP1    | exonic     | NM_.      | syr | ARAP1:  |
| ACa02 | 11 | #### | .         | C | A | . | PA:GDPD5    | intronic   | NM_.      | .   | .       |
| ACa02 | 11 | #### | rs3831451 | A | G | . | PA:MYO7A    | intronic   | NM_.      | .   | .       |
| ACa02 | 11 | #### | .         | A | T | . | PA:INTS4    | intronic   | NM_.      | .   | .       |
| ACa02 | 11 | #### | .         | C | T | . | PA:.        | intergen   | NM_dist=. | .   | .       |
| ACa02 | 11 | #### | rs1441056 | C | T | . | PA:BACE1    | intronic   | NM_.      | .   | .       |
| ACa02 | 11 | #### | rs5379167 | G | T | . | PA:OR8B8    | exonic     | NM_.      | mis | OR8B8:  |
| ACa02 | 11 | #### | .         | T | C | . | PA:.        | intergen   | NM_dist=. | .   | .       |
| ACa02 | 12 | #### | rs1482401 | C | G | . | PA:.        | intergen   | NR_dist=. | .   | .       |
| ACa02 | 12 | #### | .         | T | A | . | PA:TULP3    | exonic     | NM_.      | mis | TULP3:  |
| ACa02 | 12 | #### | rs2005141 | T | C | . | PA:.        | intergen   | NR_dist=. | .   | .       |
| ACa02 | 12 | #### | .         | G | A | . | PA:ASUN     | exonic     | NM_.      | syr | ASUN:f  |
| ACa02 | 12 | #### | .         | T | C | . | PA:BAZ2A    | exonic     | NM_.      | syr | BAZ2A:  |
| ACa02 | 12 | #### | rs3737629 | G | A | . | PA:ZBTB39   | exonic     | NM_.      | mis | ZBTB39: |
| ACa02 | 12 | #### | .         | C | T | . | PA:OTOGL    | intronic   | NM_.      | .   | .       |
| ACa02 | 12 | #### | .         | G | A | . | PA:PPFIA2   | exonic     | NM_.      | sto | PPFIA2  |
| ACa02 | 12 | #### | .         | C | G | . | PA:.        | intergen   | NM_dist=. | .   | .       |
| ACa02 | 12 | #### | .         | C | T | . | PA:BTBD11   | exonic     | NM_.      | mis | BTBD11: |
| ACa02 | 12 | #### | .         | G | A | . | PA:PPTC7    | intronic   | NM_.      | .   | .       |
| ACa02 | 12 | #### | rs3495666 | A | G | . | PA:PPTC7    | intronic   | NM_.      | .   | .       |
| ACa02 | 12 | #### | .         | G | C | . | PA:NOS1     | intronic   | NM_.      | .   | .       |
| ACa02 | 12 | #### | .         | C | G | . | PA:NCOR2    | exonic     | NM_.      | mis | NCOR2   |
| ACa02 | 13 | #### | .         | A | G | . | PA:HMGB1    | UTR3       | NM_NM_.   | .   | .       |
| ACa02 | 13 | #### | .         | A | C | . | PA:VWA8     | intronic   | NM_.      | .   | .       |
| ACa02 | 13 | #### | rs3772091 | T | C | . | PA:.        | intergen   | NR_dist=. | .   | .       |
| ACa02 | 13 | #### | .         | G | T | . | PA:.        | intergen   | NM_dist=. | .   | .       |
| ACa02 | 13 | #### | .         | C | G | . | PA:TPP2     | intronic   | NM_.      | .   | .       |
| ACa02 | 14 | #### | rs2259899 | C | A | . | PA:.        | intergen   | NR_dist=. | .   | .       |
| ACa02 | 14 | #### | rs7532438 | G | A | . | PA:OR4K15   | exonic     | NM_.      | mis | OR4K15: |
| ACa02 | 14 | #### | .         | T | A | . | PA:.        | intergen   | NM_dist=. | .   | .       |
| ACa02 | 14 | #### | .         | G | T | . | PA:.        | intergen   | NM_dist=. | .   | .       |

|       |    |      |           |   |   |   |              |              |           |     |         |
|-------|----|------|-----------|---|---|---|--------------|--------------|-----------|-----|---------|
| ACa02 | 14 | #### | .         | T | C | . | PA:C14orf183 | exonic       | NM_       | mis | C14orf1 |
| ACa02 | 14 | #### | .         | G | C | . | PA:RBM25     | exonic       | NM_       | mis | RBM25   |
| ACa02 | 14 | #### | .         | G | A | . | PA:LTBP2     | intronic     | NM_       | .   | .       |
| ACa02 | 14 | #### | .         | A | C | . | PA:SLC25A47  | intronic     | NM_       | .   | .       |
| ACa02 | 14 | #### | rs9310230 | C | T | . | PA:MEG3      | ncRNA_NR_    | .         | .   | .       |
| ACa02 | 14 | #### | .         | C | T | . | PA:TRMT61A   | intronic     | NM_       | .   | .       |
| ACa02 | 15 | #### | rs2259724 | A | G | . | PA:LINC0119  | ncRNA_NR_NR_ | .         | .   | .       |
| ACa02 | 15 | #### | rs2648130 | G | T | . | PA:.         | intergen     | NM_dist=  | .   | .       |
| ACa02 | 15 | #### | rs2015085 | C | A | . | PA:.         | intergen     | NR_dist=  | .   | .       |
| ACa02 | 15 | #### | rs2007357 | A | G | . | PA:.         | intergen     | NM_dist=  | .   | .       |
| ACa02 | 15 | #### | .         | C | A | . | PA:RYS3      | exonic       | NM_       | unl | UNKNC   |
| ACa02 | 15 | #### | .         | A | G | . | PA:VPS18     | exonic       | NM_       | syr | VPS18:  |
| ACa02 | 15 | #### | .         | G | A | . | PA:SLC12A1   | intronic     | NM_       | .   | .       |
| ACa02 | 15 | #### | .         | C | T | . | PA:RAB8B     | UTR5         | NM_NM_    | .   | .       |
| ACa02 | 15 | #### | .         | C | T | . | PA:PKM       | intronic     | NM_       | .   | .       |
| ACa02 | 15 | #### | .         | C | A | . | PA:NEO1      | intronic     | NM_       | .   | .       |
| ACa02 | 15 | #### | .         | C | T | . | PA:GOLGA6C   | intronic     | NM_       | .   | .       |
| ACa02 | 15 | #### | rs1401448 | T | C | . | PA:.         | intergen     | NR_dist=  | .   | .       |
| ACa02 | 15 | #### | rs8788873 | C | A | . | PA:SCAPER    | intronic     | NM_       | .   | .       |
| ACa02 | 15 | #### | rs2870850 | G | A | . | PA:.         | intergen     | NM_dist=  | .   | .       |
| ACa02 | 15 | #### | .         | C | T | . | PA:SLCO3A1   | intronic     | NM_       | .   | .       |
| ACa02 | 15 | #### | rs7724699 | C | T | . | PA:ADAMTS1   | exonic       | NM_       | syr | ADAMT   |
| ACa02 | 15 | #### | .         | G | A | . | PA:WASH3P    | ncRNA_NR_    | .         | .   | .       |
| ACa02 | 16 | #### | rs7760391 | C | T | . | PA:NP1PA1    | intronic     | NM_       | .   | .       |
| ACa02 | 16 | #### | .         | C | G | . | PA:NDE1      | intronic     | NM_       | .   | .       |
| ACa02 | 16 | #### | .         | G | A | . | PA:.         | intergen     | NM_dist=  | .   | .       |
| ACa02 | 16 | #### | .         | C | T | . | PA:SRCAP     | exonic       | NM_       | mis | SRCAP   |
| ACa02 | 16 | #### | rs2111615 | A | G | . | PA:TP53TG3l  | intronic     | NM_       | .   | .       |
| ACa02 | 16 | #### | rs1123661 | T | C | . | PA:TP53TG3l  | intronic     | NM_       | .   | .       |
| ACa02 | 16 | #### | .         | C | A | . | PA:.         | intergen     | NR_dist=  | .   | .       |
| ACa02 | 16 | #### | rs5547762 | C | T | . | PA:.         | intergen     | NR_dist=  | .   | .       |
| ACa02 | 16 | #### | rs3718897 | C | T | . | PA:.         | intergen     | NR_dist=  | .   | .       |
| ACa02 | 16 | #### | rs4967312 | G | T | . | PA:.         | intergen     | NOI dist= | .   | .       |
| ACa02 | 16 | #### | rs4270195 | G | C | . | PA:.         | intergen     | NOI dist= | .   | .       |
| ACa02 | 16 | #### | rs4347658 | A | T | . | PA:.         | intergen     | NOI dist= | .   | .       |
| ACa02 | 16 | #### | rs4246399 | T | C | . | PA:.         | intergen     | NOI dist= | .   | .       |
| ACa02 | 16 | #### | rs5908263 | A | G | . | PA:.         | intergen     | NOI dist= | .   | .       |
| ACa02 | 16 | #### | rs4249045 | T | C | . | PA:.         | intergen     | NOI dist= | .   | .       |
| ACa02 | 16 | #### | rs7188365 | G | T | . | PA:.         | intergen     | NOI dist= | .   | .       |
| ACa02 | 16 | #### | rs4249050 | C | G | . | PA:.         | intergen     | NOI dist= | .   | .       |
| ACa02 | 16 | #### | rs4505355 | C | T | . | PA:.         | intergen     | NOI dist= | .   | .       |
| ACa02 | 16 | #### | rs1244825 | T | G | . | PA:.         | intergen     | NOI dist= | .   | .       |
| ACa02 | 16 | #### | rs1393031 | A | G | . | PA:.         | intergen     | NOI dist= | .   | .       |
| ACa02 | 16 | #### | rs5614462 | A | C | . | PA:.         | intergen     | NOI dist= | .   | .       |
| ACa02 | 16 | #### | rs4967197 | T | G | . | PA:.         | intergen     | NOI dist= | .   | .       |
| ACa02 | 16 | #### | rs4450416 | A | G | . | PA:.         | intergen     | NOI dist= | .   | .       |
| ACa02 | 16 | #### | rs8056404 | C | G | . | PA:.         | intergen     | NOI dist= | .   | .       |
| ACa02 | 16 | #### | rs4246356 | C | T | . | PA:.         | intergen     | NOI dist= | .   | .       |
| ACa02 | 16 | #### | rs8052624 | G | T | . | PA:.         | intergen     | NOI dist= | .   | .       |
| ACa02 | 16 | #### | rs4249654 | A | T | . | PA:.         | intergen     | NOI dist= | .   | .       |
| ACa02 | 16 | #### | rs2885782 | G | T | . | PA:.         | intergen     | NOI dist= | .   | .       |
| ACa02 | 16 | #### | rs6153388 | C | T | . | PA:.         | intergen     | NOI dist= | .   | .       |
| ACa02 | 16 | #### | .         | G | C | . | PA:.         | intergen     | NOI dist= | .   | .       |
| ACa02 | 16 | #### | rs2875315 | T | C | . | PA:.         | intergen     | NOI dist= | .   | .       |

|       |    |      |           |   |   |   |             |          |           |        |         |
|-------|----|------|-----------|---|---|---|-------------|----------|-----------|--------|---------|
| ACa02 | 16 | #### | .         | G | A | . | PA:.        | intergen | NOI       | dist=. | .       |
| ACa02 | 16 | #### | rs1479181 | C | G | . | PA:.        | intergen | NOI       | dist=. | .       |
| ACa02 | 16 | #### | rs8677676 | C | T | . | PA:.        | intergen | NOI       | dist=. | .       |
| ACa02 | 16 | #### | .         | C | G | . | PA:HYDIN    | intronic | NM_.      | .      | .       |
| ACa02 | 16 | #### | rs1891151 | G | C | . | PA:HP       | exonic   | NM_.      | mis    | HP:NM_  |
| ACa02 | 16 | #### | rs1291890 | T | C | . | PA:HPR      | intronic | NM_.      | .      | .       |
| ACa02 | 16 | #### | .         | G | T | . | PA:CNTNAP4  | intronic | NM_.      | .      | .       |
| ACa02 | 16 | #### | .         | C | A | . | PA:ACSF3    | exonic   | NM_.      | mis    | ACSF3:  |
| ACa02 | 16 | #### | rs7697160 | C | T | . | PA:ACSF3    | exonic   | NM_.      | mis    | ACSF3:  |
| ACa02 | 16 | #### | rs7945920 | C | A | . | PA:.        | ncRNA_   | NR_.      | .      | .       |
| ACa02 | 16 | #### | rs3697515 | C | A | . | PA:.        | ncRNA_   | NR_.      | .      | .       |
| ACa02 | 16 | #### | rs5596034 | A | G | . | PA:.        | ncRNA_   | NR_.      | .      | .       |
| ACa02 | 17 | #### | .         | G | A | . | PA:XAF1     | exonic   | NM_.      | mis    | XAF1:N  |
| ACa02 | 17 | #### | .         | A | C | . | PA:CLDN7    | intronic | NM_.      | .      | .       |
| ACa02 | 17 | #### | .         | C | T | . | PA:LOC28402 | ncRNA_   | NR_.      | .      | .       |
| ACa02 | 17 | #### | .         | G | A | . | PA:MYH13    | intronic | NM_.      | .      | .       |
| ACa02 | 17 | #### | rs9806119 | C | T | . | PA:DNAH9    | intronic | NM_.      | .      | .       |
| ACa02 | 17 | #### | rs7571703 | C | T | . | PA:DNAH9    | intronic | NM_.      | .      | .       |
| ACa02 | 17 | #### | rs1460005 | T | A | . | PA:CCDC144  | intronic | NM_.      | .      | .       |
| ACa02 | 17 | #### | rs2168782 | A | G | . | PA:.        | intergen | NR_dist=. | .      | .       |
| ACa02 | 17 | #### | .         | C | G | . | PA:FLJ36000 | ncRNA_   | NR_.      | .      | .       |
| ACa02 | 17 | #### | rs4362423 | T | G | . | PA:.        | intergen | NM_dist=. | .      | .       |
| ACa02 | 17 | #### | rs4283255 | A | G | . | PA:.        | intergen | NM_dist=. | .      | .       |
| ACa02 | 17 | #### | rs1403689 | T | G | . | PA:.        | intergen | NM_dist=. | .      | .       |
| ACa02 | 17 | #### | rs1405621 | C | T | . | PA:.        | intergen | NM_dist=. | .      | .       |
| ACa02 | 17 | #### | .         | G | C | . | PA:.        | intergen | NM_dist=. | .      | .       |
| ACa02 | 17 | #### | rs7126069 | C | T | . | PA:TBC1D3F  | intronic | NM_.      | .      | .       |
| ACa02 | 17 | #### | rs573849  | T | C | . | PA:.        | upstream | NM_.      | .      | .       |
| ACa02 | 17 | #### | rs9693530 | T | A | . | PA:.        | intergen | NM_dist=. | .      | .       |
| ACa02 | 17 | #### | .         | T | A | . | PA:LOC44043 | ncRNA_   | NR_.      | .      | .       |
| ACa02 | 17 | #### | .         | C | G | . | PA:GPR179   | intronic | NM_.      | .      | .       |
| ACa02 | 17 | #### | .         | G | A | . | PA:CA10     | UTR5     | NM_NM_.   | .      | .       |
| ACa02 | 17 | #### | rs7516213 | G | T | . | PA:TBC1D3P  | ncRNA_   | NR_.      | .      | .       |
| ACa02 | 17 | #### | rs7607356 | G | A | . | PA:AXIN2    | exonic   | NM_.      | syr    | AXIN2:I |
| ACa02 | 17 | #### | .         | C | T | . | PA:SEC14L1  | exonic   | NM_.      | mis    | SEC14I  |
| ACa02 | 17 | #### | .         | G | A | . | PA:RBF3X3   | intronic | NM_.      | .      | .       |
| ACa02 | 17 | #### | rs1138327 | C | T | . | PA:BAIAP2-A | ncRNA_   | NR_.      | .      | .       |
| ACa02 | 17 | #### | rs8791354 | A | T | . | PA:TBCD     | intronic | NM_.      | .      | .       |
| ACa02 | 18 | #### | .         | G | C | . | PA:.        | intergen | NR_dist=. | .      | .       |
| ACa02 | 18 | #### | rs8658406 | G | A | . | PA:.        | intergen | NM_dist=. | .      | .       |
| ACa02 | 18 | #### | rs8676712 | C | T | . | PA:.        | intergen | NM_dist=. | .      | .       |
| ACa02 | 19 | #### | .         | C | A | . | PA:GAMT     | intronic | NM_.      | .      | .       |
| ACa02 | 19 | #### | rs3756184 | G | A | . | PA:.        | upstream | NM_.      | .      | .       |
| ACa02 | 19 | #### | .         | G | A | . | PA:THOP1    | UTR5     | NM_NM_.   | .      | .       |
| ACa02 | 19 | #### | .         | G | T | . | PA:THOP1    | UTR5     | NM_NM_.   | .      | .       |
| ACa02 | 19 | #### | rs5460066 | G | A | . | PA:PNPLA6   | exonic   | NM_.      | mis    | PNPLA6  |
| ACa02 | 19 | #### | .         | T | C | . | PA:SLC1A6   | intronic | NM_.      | .      | .       |
| ACa02 | 19 | #### | .         | C | T | . | PA:CEBPG    | UTR5     | NM_NM_.   | .      | .       |
| ACa02 | 19 | #### | .         | G | A | . | PA:ARHGAP3  | intronic | NM_.      | .      | .       |
| ACa02 | 19 | #### | rs2385185 | G | C | . | PA:.        | intergen | NR_dist=. | .      | .       |
| ACa02 | 19 | #### | rs7125437 | C | G | . | PA:.        | intergen | NR_dist=. | .      | .       |
| ACa02 | 19 | #### | .         | G | C | . | PA:RYR1     | intronic | NM_.      | .      | .       |
| ACa02 | 19 | #### | rs1390553 | T | A | . | PA:.        | intergen | NM_dist=. | .      | .       |
| ACa02 | 19 | #### | rs7714460 | G | A | . | PA:FPR1     | exonic   | NM_.      | mis    | FPR1:N  |

|       |    |      |           |   |   |   |             |                   |             |   |
|-------|----|------|-----------|---|---|---|-------------|-------------------|-------------|---|
| ACa02 | 19 | #### | rs1785512 | T | C | . | PA:TPM3P9   | ncRNA_NR_         | .           | . |
| ACa02 | 19 | #### | rs9207323 | G | A | . | PA:.        | intergenNM_dist=  | .           | . |
| ACa02 | 20 | #### | .         | T | G | . | PA:RRBP1    | exonic NM_        | miR RRBP1   |   |
| ACa02 | 20 | #### | .         | G | A | . | PA:.        | intergenNR_dist=  | .           | . |
| ACa02 | 20 | #### | rs7787265 | G | A | . | PA:ACSS1    | exonic NM_        | syr ACSS1:  |   |
| ACa02 | 20 | #### | rs3775467 | G | A | . | PA:ACSS1    | intronic NM_      | .           | . |
| ACa02 | 20 | #### | .         | C | T | . | PA:FRG1B    | ncRNA_NR_         | .           | . |
| ACa02 | 20 | #### | .         | C | A | . | PA:L3MBTL1  | intronic NM_      | .           | . |
| ACa02 | 20 | #### | .         | G | A | . | PA:ZSWIM1   | intronic NM_      | .           | . |
| ACa02 | 20 | #### | .         | G | A | . | PA:BIRC7    | exonic NM_        | miR BIRC7:l |   |
| ACa02 | 21 | #### | rs3747993 | C | G | . | PA:.        | intergenNOI dist= | .           | . |
| ACa02 | 21 | #### | rs3730978 | G | A | . | PA:.        | intergenNOI dist= | .           | . |
| ACa02 | 21 | #### | rs2927801 | G | A | . | PA:.        | intergenNR_dist=  | .           | . |
| ACa02 | 21 | #### | rs1996169 | T | C | . | PA:BAGE2,B/ | intronic NM_      | .           | . |
| ACa02 | 21 | #### | rs8789866 | G | T | . | PA:BAGE4,B/ | intronic NM_      | .           | . |
| ACa02 | 21 | #### | rs4358221 | G | A | . | PA:.        | intergenNM_dist=  | .           | . |
| ACa02 | 21 | #### | .         | T | A | . | PA:.        | intergenNM_dist=  | .           | . |
| ACa02 | 21 | #### | rs8664333 | A | C | . | PA:.        | upstreamNM_       | .           | . |
| ACa02 | 21 | #### | rs7967544 | T | G | . | PA:LOC10013 | ncRNA_NR_         | .           | . |
| ACa02 | 21 | #### | .         | G | A | . | PA:TRAPPC1  | exonic NM_        | syr TRAPP   |   |
| ACa02 | 21 | #### | .         | G | A | . | PA:DIP2A    | intronic NM_      | .           | . |
| ACa02 | 21 | #### | .         | C | T | . | PA:.        | intergenNM_dist=  | .           | . |
| ACa02 | 22 | #### | .         | G | A | . | PA:TBX1     | exonic NM_        | miR TBX1:N  |   |
| ACa02 | 22 | #### | rs3702204 | C | T | . | PA:.        | intergenNM_dist=  | .           | . |
| ACa02 | 22 | #### | rs1119554 | G | T | . | PA:.        | intergenNM_dist=  | .           | . |
| ACa02 | 22 | #### | rs1880252 | C | T | . | PA:POM121L  | ncRNA_NR_         | .           | . |
| ACa02 | 22 | #### | .         | G | A | . | PA:.        | intergenNR_dist=  | .           | . |
| ACa02 | X  | #### | rs1637792 | G | C | . | PA:VCX      | exonic NM_        | miR VCX:NM  |   |
| ACa02 | X  | #### | .         | G | A | . | PA:MID1     | intronic NM_      | .           | . |
| ACa02 | X  | #### | .         | G | A | . | PA:DCAF8L2  | exonic NM_        | miR DCAF8L  |   |
| ACa02 | X  | #### | .         | C | A | . | PA:.        | intergenNM_dist=  | .           | . |
| ACa02 | X  | #### | rs7740495 | G | A | . | PA:FAM47A   | exonic NM_        | syr FAM47,  |   |
| ACa02 | X  | #### | .         | G | C | . | PA:CDK16    | intronic NM_      | .           | . |
| ACa02 | X  | #### | .         | G | T | . | PA:CDK16    | UTR5 NM_NM_       | .           | . |
| ACa02 | X  | #### | .         | G | T | . | PA:.        | intergenNOI dist= | .           | . |
| ACa02 | X  | #### | rs8686279 | A | C | . | PA:.        | intergenNOI dist= | .           | . |
| ACa02 | X  | #### | .         | C | T | . | PA:.        | intergenNOI dist= | .           | . |
| ACa02 | X  | #### | .         | G | C | . | PA:.        | intergenNOI dist= | .           | . |
| ACa02 | X  | #### | .         | C | T | . | PA:MED12    | exonic NM_        | sto MED12   |   |
| ACa02 | X  | #### | .         | T | A | . | PA:GPRASP1  | exonic NM_        | syr GPRAS   |   |
| ACa02 | X  | #### | .         | G | A | . | PA:.        | intergenNM_dist=  | .           | . |
| ACa02 | X  | #### | .         | A | G | . | PA:DCX      | intronic NM_      | .           | . |
| ACa02 | X  | #### | .         | C | A | . | PA:OCRL     | UTR3 NM_NM_       | .           | . |
| ACa02 | X  | #### | .         | C | T | . | PA:IGSF1    | intronic NM_      | .           | . |
| ACa02 | X  | #### | rs9883463 | T | G | . | PA:MAP7D3   | intronic NM_      | .           | . |
| ACa02 | X  | #### | .         | G | C | . | PA:FGF13    | intronic NM_      | .           | . |
| ACa02 | X  | #### | rs7821231 | G | A | . | PA:.        | upstreamNR_       | .           | . |
| ACa02 | X  | #### | .         | G | A | . | PA:FLNA     | intronic NM_      | .           | . |
| ACa02 | Y  | #### | rs3769023 | C | A | . | PA:.        | intergenNOI dist= | .           | . |
| ACa02 | MT | 759  | .         | C | T | . | PA:.        | intergenNOI dist= | .           | . |
| ACa02 | MT | #### | rs1057516 | C | T | . | PA:.        | intergenNOI dist= | .           | . |
| ACa03 | 1  | #### | .         | A | G | . | PA:.        | intergenNR_dist=  | .           | . |
| ACa03 | 1  | #### | .         | G | A | . | PA:CDK11A,C | intronic NM_      | .           | . |
| ACa03 | 1  | #### | .         | C | T | . | PA:TP73     | exonic NM_        | miR TP73:N  |   |

|       |   |      |           |   |   |   |             |            |           |     |          |
|-------|---|------|-----------|---|---|---|-------------|------------|-----------|-----|----------|
| ACa03 | 1 | #### | rs7579432 | C | T | . | PA:VPS13D   | intronic   | NM_.      | .   | .        |
| ACa03 | 1 | #### | rs5565927 | T | C | . | PA:NBPF1    | intronic   | NM_.      | .   | .        |
| ACa03 | 1 | #### | rs7619917 | T | C | . | PA:NBPF1    | intronic   | NM_.      | .   | .        |
| ACa03 | 1 | #### | rs663828  | T | C | . | PA:NBPF1    | intronic   | NM_.      | .   | .        |
| ACa03 | 1 | #### | rs646524  | T | G | . | PA:NBPF1    | intronic   | NM_.      | .   | .        |
| ACa03 | 1 | #### | rs4596945 | G | C | . | PA:NBPF1    | intronic   | NM_.      | .   | .        |
| ACa03 | 1 | #### | rs2296161 | C | T | . | PA:.        | upstrear   | NR_.      | .   | .        |
| ACa03 | 1 | #### | rs5616387 | C | T | . | PA:EMC1     | exonic     | NM_.      | mis | EMC1:1   |
| ACa03 | 1 | #### | .         | G | A | . | PA:ZC3H12A  | intronic   | NM_.      | .   | .        |
| ACa03 | 1 | #### | rs9490484 | G | T | . | PA:HECTD3   | intronic   | NM_.      | .   | .        |
| ACa03 | 1 | #### | .         | T | G | . | PA:ANGPTL3  | UTR3       | NM_NM_.   | .   | .        |
| ACa03 | 1 | #### | .         | G | T | . | PA:ERICH3   | exonic     | NM_.      | mis | ERICH3:1 |
| ACa03 | 1 | #### | .         | C | T | . | PA:RABGGTE  | intronic   | NM_.      | .   | .        |
| ACa03 | 1 | #### | .         | G | A | . | PA:NHLH2    | exonic     | NM_.      | mis | NHLH2:1  |
| ACa03 | 1 | #### | rs1409433 | T | C | . | PA:.        | intergen   | NR_dist=. | .   | .        |
| ACa03 | 1 | #### | rs2022010 | G | A | . | PA:.        | intergen   | NR_dist=. | .   | .        |
| ACa03 | 1 | #### | rs7763460 | C | G | . | PA:.        | ncRNA_NR_. | .         | .   | .        |
| ACa03 | 1 | #### | rs1457064 | G | A | . | PA:.        | intergen   | NR_dist=. | .   | .        |
| ACa03 | 1 | #### | .         | C | G | . | PA:NBPF20   | intronic   | NM_.      | .   | .        |
| ACa03 | 1 | #### | rs1148852 | G | C | . | PA:NBPF9,NE | intronic   | NM_.      | .   | .        |
| ACa03 | 1 | #### | rs3746294 | A | G | . | PA:NBPF20,F | intronic   | NM_.      | .   | .        |
| ACa03 | 1 | #### | rs3675661 | C | G | . | PA:NBPF25P  | ncRNA_NR_. | .         | .   | .        |
| ACa03 | 1 | #### | rs7986155 | T | A | . | PA:NBPF8    | intronic   | NM_.      | .   | .        |
| ACa03 | 1 | #### | rs7593611 | G | A | . | PA:MEX3A    | exonic     | NM_.      | syr | MEX3A    |
| ACa03 | 1 | #### | .         | G | T | . | PA:OR6P1    | exonic     | NM_.      | mis | OR6P1:1  |
| ACa03 | 1 | #### | .         | G | C | . | PA:LAD1     | intronic   | NM_.      | .   | .        |
| ACa03 | 1 | #### | rs7508890 | G | A | . | PA:PPFIA4   | exonic     | NM_.      | mis | PPFIA4   |
| ACa03 | 1 | #### | rs1454313 | A | G | . | PA:LEFTY1   | exonic     | NM_.      | mis | LEFTY1:1 |
| ACa03 | 1 | #### | rs3720052 | C | T | . | PA:OR6F1    | exonic     | NM_.      | mis | OR6F1:1  |
| ACa03 | 1 | #### | rs8789457 | A | G | . | PA:.        | upstrear   | NM_.      | .   | .        |
| ACa03 | 2 | #### | .         | C | A | . | PA:VSNL1    | exonic     | NM_.      | mis | VSNL1:1  |
| ACa03 | 2 | #### | .         | T | A | . | PA:LRRTM4   | UTR5       | NM_NM_.   | .   | .        |
| ACa03 | 2 | #### | .         | G | A | . | PA:LRRTM1   | exonic     | NM_.      | syr | LRRTM    |
| ACa03 | 2 | #### | rs2013675 | G | A | . | PA:.        | intergen   | NR_dist=. | .   | .        |
| ACa03 | 2 | #### | .         | G | C | . | PA:RGPD1,R  | intronic   | NM_.      | .   | .        |
| ACa03 | 2 | #### | .         | T | C | . | PA:.        | intergen   | NM_dist=. | .   | .        |
| ACa03 | 2 | #### | rs1473449 | G | T | . | PA:UBR3     | intronic   | NM_.      | .   | .        |
| ACa03 | 2 | #### | .         | C | T | . | PA:ITGA4    | exonic     | NM_.      | mis | ITGA4:1  |
| ACa03 | 2 | #### | .         | C | T | . | PA:ATIC     | splicing   | NM_NM_.   | .   | .        |
| ACa03 | 2 | #### | .         | C | A | . | PA:.        | intergen   | NR_dist=. | .   | .        |
| ACa03 | 3 | #### | rs1050893 | G | C | . | PA:KIF9     | intronic   | NM_.      | .   | .        |
| ACa03 | 3 | #### | .         | C | T | . | PA:KIF9     | intronic   | NM_.      | .   | .        |
| ACa03 | 3 | #### | rs1178604 | G | A | . | PA:CACNA2C  | intronic   | NM_.      | .   | .        |
| ACa03 | 3 | #### | rs3744125 | G | A | . | PA:.        | intergen   | NM_dist=. | .   | .        |
| ACa03 | 3 | #### | rs1451899 | C | T | . | PA:ROBO2    | intronic   | NM_.      | .   | .        |
| ACa03 | 3 | #### | .         | G | A | . | PA:MGLL     | intronic   | NM_.      | .   | .        |
| ACa03 | 3 | #### | .         | A | C | . | PA:NUDT16   | UTR3       | NM_NM_.   | .   | .        |
| ACa03 | 3 | #### | .         | A | C | . | PA:IL20RB   | intronic   | NM_.      | .   | .        |
| ACa03 | 3 | #### | .         | T | G | . | PA:ARMC8    | exonic     | NM_.      | syr | ARMC8    |
| ACa03 | 3 | #### | rs1057519 | G | A | . | PA:PIK3CA   | exonic     | NM_.      | mis | PIK3CA   |
| ACa03 | 3 | #### | rs1048860 | G | A | . | PA:PIK3CA   | exonic     | NM_.      | mis | PIK3CA   |
| ACa03 | 3 | #### | .         | C | A | . | PA:FYTTD1   | intronic   | NM_.      | .   | .        |
| ACa03 | 4 | #### | rs3725657 | G | A | . | PA:ZFYVE28  | exonic     | NM_.      | mis | ZFYVE:1  |
| ACa03 | 4 | #### | .         | A | G | . | PA:JAKMIP1  | splicing   | NM_NM_.   | .   | .        |

|       |   |      |           |   |   |   |             |            |           |     |         |
|-------|---|------|-----------|---|---|---|-------------|------------|-----------|-----|---------|
| ACa03 | 4 | #### | rs8796734 | A | G | . | PA:.        | upstream   | NM_.      | .   | .       |
| ACa03 | 4 | #### | rs5941177 | C | T | . | PA:.        | intergen   | NM_dist=. | .   | .       |
| ACa03 | 4 | #### | .         | C | T | . | PA:NPFFR2   | exonic     | NM_.      | mis | NPFFR   |
| ACa03 | 4 | #### | .         | A | C | . | PA:SPOCK3   | intronic   | NM_.      | .   | .       |
| ACa03 | 5 | #### | rs4288119 | G | A | . | PA:.        | intergen   | NR_dist=. | .   | .       |
| ACa03 | 5 | #### | rs8669155 | C | T | . | PA:.        | intergen   | NR_dist=. | .   | .       |
| ACa03 | 5 | #### | rs7765625 | G | A | . | PA:JADE2    | exonic     | NM_.      | mis | JADE2:  |
| ACa03 | 5 | #### | rs5593800 | C | T | . | PA:.        | intergen   | NM_dist=. | .   | .       |
| ACa03 | 5 | #### | .         | G | A | . | PA:.        | intergen   | NR_dist=. | .   | .       |
| ACa03 | 6 | #### | .         | A | C | . | PA:BPHL     | intronic   | NM_.      | .   | .       |
| ACa03 | 6 | #### | rs1513411 | G | C | . | PA:HLA-B    | exonic     | NM_.      | mis | HLA-B:l |
| ACa03 | 6 | #### | .         | C | A | . | PA:EHMT2    | exonic     | NM_.      | mis | EHMT2   |
| ACa03 | 6 | #### | rs7668272 | C | T | . | PA:PPARD    | exonic     | NM_.      | mis | PPARD   |
| ACa03 | 6 | #### | .         | G | A | . | PA:TNFRSF2  | intronic   | NM_.      | .   | .       |
| ACa03 | 6 | #### | .         | T | A | . | PA:GSTA2    | intronic   | NM_.      | .   | .       |
| ACa03 | 6 | #### | .         | T | G | . | PA:COL12A1  | intronic   | NM_.      | .   | .       |
| ACa03 | 7 | #### | .         | C | T | . | PA:THSD7A   | intronic   | NM_.      | .   | .       |
| ACa03 | 7 | #### | .         | C | T | . | PA:C7orf31  | intronic   | NM_.      | .   | .       |
| ACa03 | 7 | #### | .         | G | A | . | PA:HECW1    | exonic     | NM_.      | mis | HECW1   |
| ACa03 | 7 | #### | .         | T | G | . | PA:GCK      | intronic   | NM_.      | .   | .       |
| ACa03 | 7 | #### | .         | C | T | . | PA:.        | intergen   | NM_dist=. | .   | .       |
| ACa03 | 7 | #### | rs1439657 | G | A | . | PA:.        | intergen   | NR_dist=. | .   | .       |
| ACa03 | 7 | #### | .         | C | T | . | PA:.        | intergen   | NR_dist=. | .   | .       |
| ACa03 | 7 | #### | rs8799634 | G | T | . | PA:.        | intergen   | NR_dist=. | .   | .       |
| ACa03 | 7 | #### | .         | A | G | . | PA:.        | intergen   | NR_dist=. | .   | .       |
| ACa03 | 7 | #### | rs2002309 | C | G | . | PA:.        | intergen   | NR_dist=. | .   | .       |
| ACa03 | 7 | #### | .         | C | A | . | PA:.        | intergen   | NR_dist=. | .   | .       |
| ACa03 | 7 | #### | rs2018986 | T | C | . | PA:.        | intergen   | NR_dist=. | .   | .       |
| ACa03 | 7 | #### | .         | C | T | . | PA:SPDYE5   | intronic   | NM_.      | .   | .       |
| ACa03 | 7 | #### | .         | C | T | . | PA:SPDYE5   | intronic   | NM_.      | .   | .       |
| ACa03 | 7 | #### | .         | G | A | . | PA:.        | intergen   | NM_dist=. | .   | .       |
| ACa03 | 7 | #### | .         | G | A | . | PA:GNAI1    | exonic     | NM_.      | mis | GNAI1:l |
| ACa03 | 7 | #### | .         | C | T | . | PA:SAMD9    | exonic     | NM_.      | mis | SAMD9   |
| ACa03 | 7 | #### | rs2676016 | C | T | . | PA:PDK4     | exonic     | NM_.      | mis | PDK4:N  |
| ACa03 | 7 | #### | rs1826826 | G | A | . | PA:NYAP1    | intronic   | NM_.      | .   | .       |
| ACa03 | 7 | #### | rs1409779 | C | T | . | PA:ST7      | intronic   | NM_.      | .   | .       |
| ACa03 | 7 | #### | .         | A | C | . | PA:NOBOX    | intronic   | NM_.      | .   | .       |
| ACa03 | 7 | #### | .         | G | C | . | PA:KMT2C    | intronic   | NM_.      | .   | .       |
| ACa03 | 7 | #### | rs7962502 | C | T | . | PA:.        | intergen   | NM_dist=. | .   | .       |
| ACa03 | 8 | #### | .         | G | C | . | PA:ANGPT2   | exonic     | NM_.      | syr | ANGPT   |
| ACa03 | 8 | #### | rs3763515 | G | A | . | PA:.        | intergen   | NR_dist=. | .   | .       |
| ACa03 | 8 | #### | rs5673338 | T | A | . | PA:.        | intergen   | NR_dist=. | .   | .       |
| ACa03 | 8 | #### | .         | C | G | . | PA:LOC10192 | ncRNA_NR_. | .         | .   | .       |
| ACa03 | 8 | #### | .         | C | T | . | PA:SLC26A7  | intronic   | NM_.      | .   | .       |
| ACa03 | 8 | #### | .         | G | A | . | PA:VPS13B   | intronic   | NM_.      | .   | .       |
| ACa03 | 8 | #### | rs5609552 | T | C | . | PA:KCNQ3    | intronic   | NM_.      | .   | .       |
| ACa03 | 9 | #### | .         | G | A | . | PA:FOCAD    | intronic   | NM_.      | .   | .       |
| ACa03 | 9 | #### | rs1463382 | C | T | . | PA:IL11RA   | intronic   | NM_.      | .   | .       |
| ACa03 | 9 | #### | rs7495042 | G | A | . | PA:.        | upstream   | NR_.      | .   | .       |
| ACa03 | 9 | #### | .         | C | T | . | PA:.        | ncRNA_NR_. | .         | .   | .       |
| ACa03 | 9 | #### | rs7714176 | G | A | . | PA:AQP7P1   | ncRNA_NR_. | .         | .   | .       |
| ACa03 | 9 | #### | rs4452915 | C | T | . | PA:.        | intergen   | NM_dist=. | .   | .       |
| ACa03 | 9 | #### | rs7492487 | T | C | . | PA:.        | intergen   | NM_dist=. | .   | .       |
| ACa03 | 9 | #### | rs391727  | G | C | . | PA:PGM5     | intronic   | NM_.      | .   | .       |

|       |    |      |           |   |   |   |             |            |            |                |
|-------|----|------|-----------|---|---|---|-------------|------------|------------|----------------|
| ACa03 | 9  | #### | .         | G | A | . | PA:.        | intergen   | NM_dist=.  | .              |
| ACa03 | 9  | #### | .         | G | T | . | PA:SLC28A3  | intronic   | NM_.       | .              |
| ACa03 | 9  | #### | rs2855049 | T | C | . | PA:CEL      | intronic   | NM_.       | .              |
| ACa03 | 9  | #### | rs7771119 | G | A | . | PA:NOTCH1   | exonic     | NM_.       | syr NOTCH-     |
| ACa03 | 10 | #### | .         | G | A | . | PA:CAMK1D   | exonic     | NM_.       | mis CAMK1      |
| ACa03 | 10 | #### | .         | G | A | . | PA:CACNB2   | intronic   | NM_.       | .              |
| ACa03 | 10 | #### | rs7747854 | G | A | . | PA:CCNY     | UTR3       | NM_NM_.    | .              |
| ACa03 | 10 | #### | rs1759035 | A | G | . | PA:ANKRD30  | intronic   | NM_.       | .              |
| ACa03 | 10 | #### | rs3125109 | G | A | . | PA:.        | intergen   | NR_dist=.  | .              |
| ACa03 | 10 | #### | .         | G | A | . | PA:TBATA    | intronic   | NM_.       | .              |
| ACa03 | 10 | #### | rs2018088 | G | A | . | PA:VCL      | exonic     | NM_.       | mis VCL:NM     |
| ACa03 | 10 | #### | .         | A | G | . | PA:.        | intergen   | NM_dist=.  | .              |
| ACa03 | 10 | #### | rs3128226 | C | G | . | PA:NUTM2A   | intronic   | NM_.       | .              |
| ACa03 | 10 | #### | .         | G | A | . | PA:.        | intergen   | NM_dist=.  | .              |
| ACa03 | 10 | #### | .         | C | G | . | PA:RAB11FIF | UTR3       | NM_NM_.    | .              |
| ACa03 | 10 | #### | rs5495128 | C | T | . | PA:.        | intergen   | NM_dist=.  | .              |
| ACa03 | 10 | #### | .         | C | A | . | PA:CPXM2    | exonic     | NM_.       | mis CPXM2      |
| ACa03 | 11 | #### | .         | G | T | . | PA:TSPAN18  | intronic   | NM_.       | .              |
| ACa03 | 11 | #### | .         | C | T | . | PA:C11orf80 | intronic   | NM_.       | .              |
| ACa03 | 11 | #### | .         | A | T | . | PA:MIR5692A | ncRNA_NR_. | .          | .              |
| ACa03 | 12 | #### | rs7827727 | T | C | . | PA:LOC10028 | ncRNA_NR_. | .          | .              |
| ACa03 | 12 | #### | .         | C | A | . | PA:AKAP3    | UTR5       | NM_NM_.    | .              |
| ACa03 | 12 | #### | .         | G | C | . | PA:CHD4     | exonic     | NM_.       | mis CHD4:NM    |
| ACa03 | 12 | #### | .         | G | C | . | PA:ZNF384   | intronic   | NM_.       | .              |
| ACa03 | 12 | #### | .         | C | A | . | PA:ZNF705A  | intronic   | NM_.       | .              |
| ACa03 | 12 | #### | rs1219135 | C | T | . | PA:KRAS     | exonic     | NM_.       | mis KRAS:NM    |
| ACa03 | 12 | #### | rs3731379 | C | T | . | PA:ITPR2    | exonic     | NM_.       | mis ITPR2:NM   |
| ACa03 | 12 | #### | rs4031316 | T | C | . | PA:DDX11    | intronic   | NM_.       | .              |
| ACa03 | 12 | #### | rs5661873 | C | T | . | PA:PUS7L    | exonic     | NM_.       | mis PUS7L:NM   |
| ACa03 | 12 | #### | rs9815586 | G | A | . | PA:FAM186A  | exonic     | NM_.       | sto FAM186A:NM |
| ACa03 | 12 | #### | rs1409167 | G | A | . | PA:MMP19    | intronic   | NM_.       | .              |
| ACa03 | 12 | #### | .         | C | A | . | PA:HIP1R    | intronic   | NM_.       | .              |
| ACa03 | 12 | #### | .         | G | A | . | PA:DNAH10   | intronic   | NM_.       | .              |
| ACa03 | 12 | #### | rs1707911 | T | C | . | PA:.        | intergen   | NM_dist=.  | .              |
| ACa03 | 12 | #### | rs7662808 | G | A | . | PA:DDX51    | exonic     | NM_.       | mis DDX51:NM   |
| ACa03 | 13 | #### | rs9079318 | C | T | . | PA:.        | intergen   | NR_dist=.  | .              |
| ACa03 | 13 | #### | .         | A | C | . | PA:GSX1     | intronic   | NM_.       | .              |
| ACa03 | 13 | #### | rs7666774 | G | A | . | PA:FLT3     | exonic     | NM_.       | sto FLT3:NM    |
| ACa03 | 13 | #### | .         | C | T | . | PA:DCLK1    | exonic     | NM_.       | mis DCLK1:NM   |
| ACa03 | 13 | #### | .         | C | T | . | PA:SPACA7   | intronic   | NM_.       | .              |
| ACa03 | 14 | #### | rs2018046 | T | G | . | PA:LOC10192 | ncRNA_NR_. | .          | .              |
| ACa03 | 14 | #### | rs4982820 | G | A | . | PA:.        | intergen   | NM_dist=.  | .              |
| ACa03 | 14 | #### | rs2005137 | C | T | . | PA:.        | intergen   | NM_dist=.  | .              |
| ACa03 | 14 | #### | .         | T | G | . | PA:.        | intergen   | NR_dist=.  | .              |
| ACa03 | 14 | #### | .         | T | C | . | PA:.        | intergen   | NM_dist=.  | .              |
| ACa03 | 14 | #### | rs3763109 | C | T | . | PA:.        | intergen   | NM_dist=.  | .              |
| ACa03 | 14 | #### | .         | G | T | . | PA:.        | intergen   | NM_dist=.  | .              |
| ACa03 | 14 | #### | rs7592315 | G | A | . | PA:LRRC16B  | intronic   | NM_.       | .              |
| ACa03 | 14 | #### | .         | T | A | . | PA:.        | intergen   | NM_dist=.  | .              |
| ACa03 | 14 | #### | rs7473295 | G | A | . | PA:.        | intergen   | NR_dist=.  | .              |
| ACa03 | 15 | #### | rs5686085 | C | T | . | PA:.        | intergen   | NOI_dist=. | .              |
| ACa03 | 15 | #### | rs5761409 | G | C | . | PA:.        | intergen   | NOI_dist=. | .              |
| ACa03 | 15 | #### | rs3684417 | G | T | . | PA:.        | intergen   | NM_dist=.  | .              |
| ACa03 | 15 | #### | rs1130343 | A | C | . | PA:.        | intergen   | NR_dist=.  | .              |



|       |    |      |           |   |   |   |              |          |            |             |
|-------|----|------|-----------|---|---|---|--------------|----------|------------|-------------|
| ACa03 | 15 | #### | rs1995519 | C | G | . | PA:.         | intergen | NR_dist=.  | .           |
| ACa03 | 15 | #### | rs1836337 | A | G | . | PA:.         | upstream | NR_.       | .           |
| ACa03 | 15 | #### | rs3700524 | G | A | . | PA:.         | intronic | NM_.       | .           |
| ACa03 | 15 | #### | rs3766397 | G | A | . | PA: GOLGA85  | ncRNA_   | NR_.       | .           |
| ACa03 | 15 | #### | .         | G | A | . | PA: CHRFBAM7 | intronic | NM_.       | .           |
| ACa03 | 15 | #### | rs5573362 | C | T | . | PA: SPINT1   | exonic   | NM_.       | syr SPINT1  |
| ACa03 | 15 | #### | .         | C | T | . | PA:.         | downstr  | NM_.       | .           |
| ACa03 | 15 | #### | rs7443087 | A | G | . | PA: GOLGA6E  | exonic   | NM_.       | mis GOLGA   |
| ACa03 | 15 | #### | .         | G | A | . | PA: GOLGA6L  | intronic | NM_.       | .           |
| ACa03 | 16 | #### | .         | T | C | . | PA: IFT140   | exonic   | NM_.       | mis IFT140: |
| ACa03 | 16 | #### | .         | A | T | . | PA: IL32     | exonic   | NM_.       | syr IL32:NM |
| ACa03 | 16 | #### | .         | C | T | . | PA: SNX29    | intronic | NM_.       | .           |
| ACa03 | 16 | #### | .         | G | A | . | PA: RRN3P2   | ncRNA_   | NR_.       | .           |
| ACa03 | 16 | #### | rs2887413 | C | G | . | PA:.         | intergen | NOI dist=. | .           |
| ACa03 | 16 | #### | rs4966607 | C | T | . | PA:.         | intergen | NOI dist=. | .           |
| ACa03 | 16 | #### | rs4359628 | T | G | . | PA:.         | intergen | NOI dist=. | .           |
| ACa03 | 16 | #### | rs4249500 | G | A | . | PA:.         | intergen | NOI dist=. | .           |
| ACa03 | 16 | #### | rs4372866 | C | T | . | PA:.         | intergen | NOI dist=. | .           |
| ACa03 | 16 | #### | rs4396558 | T | A | . | PA:.         | intergen | NOI dist=. | .           |
| ACa03 | 16 | #### | rs4249160 | C | T | . | PA:.         | intergen | NOI dist=. | .           |
| ACa03 | 16 | #### | rs4967780 | G | C | . | PA:.         | intergen | NOI dist=. | .           |
| ACa03 | 16 | #### | rs7203681 | C | T | . | PA:.         | intergen | NOI dist=. | .           |
| ACa03 | 16 | #### | rs7826866 | G | A | . | PA:.         | intergen | NOI dist=. | .           |
| ACa03 | 16 | #### | rs4249045 | T | C | . | PA:.         | intergen | NOI dist=. | .           |
| ACa03 | 16 | #### | rs7188365 | G | T | . | PA:.         | intergen | NOI dist=. | .           |
| ACa03 | 16 | #### | rs9972801 | A | G | . | PA:.         | intergen | NOI dist=. | .           |
| ACa03 | 16 | #### | rs4249048 | G | C | . | PA:.         | intergen | NOI dist=. | .           |
| ACa03 | 16 | #### | rs7823469 | C | A | . | PA:.         | intergen | NOI dist=. | .           |
| ACa03 | 16 | #### | rs1393031 | A | G | . | PA:.         | intergen | NOI dist=. | .           |
| ACa03 | 16 | #### | rs4090116 | C | T | . | PA:.         | intergen | NOI dist=. | .           |
| ACa03 | 16 | #### | rs4090115 | C | T | . | PA:.         | intergen | NOI dist=. | .           |
| ACa03 | 16 | #### | rs4459567 | C | T | . | PA:.         | intergen | NOI dist=. | .           |
| ACa03 | 16 | #### | rs6133865 | A | T | . | PA:.         | intergen | NOI dist=. | .           |
| ACa03 | 16 | #### | rs4341908 | A | C | . | PA:.         | intergen | NOI dist=. | .           |
| ACa03 | 16 | #### | rs4451975 | A | C | . | PA:.         | intergen | NOI dist=. | .           |
| ACa03 | 16 | #### | rs7187636 | T | C | . | PA:.         | intergen | NOI dist=. | .           |
| ACa03 | 16 | #### | .         | C | A | . | PA: PDXDC2F  | ncRNA_   | NR_.       | .           |
| ACa03 | 16 | #### | rs2004697 | A | G | . | PA: PDPR     | exonic   | NM_.       | mis PDPR:†  |
| ACa03 | 16 | #### | .         | A | C | . | PA:.         | upstream | NM_.       | .           |
| ACa03 | 16 | #### | .         | C | G | . | PA: FANCA    | exonic   | NM_.       | mis FANCA   |
| ACa03 | 16 | #### | .         | C | A | . | PA: SPIRE2   | intronic | NM_.       | .           |
| ACa03 | 17 | #### | .         | T | G | . | PA: SMYD4    | intronic | NM_.       | .           |
| ACa03 | 17 | #### | .         | G | A | . | PA: GAS7     | UTR5     | NM_NM_.    | .           |
| ACa03 | 17 | #### | .         | G | T | . | PA: ATPAF2   | UTR5     | NM_NM_.    | .           |
| ACa03 | 17 | #### | rs1440233 | G | A | . | PA:.         | intergen | NM_dist=.  | .           |
| ACa03 | 17 | #### | rs4362423 | T | G | . | PA:.         | intergen | NM_dist=.  | .           |
| ACa03 | 17 | #### | rs1409172 | A | G | . | PA:.         | intergen | NM_dist=.  | .           |
| ACa03 | 17 | #### | rs3737234 | C | A | . | PA:.         | intergen | NR_dist=.  | .           |
| ACa03 | 17 | #### | .         | C | T | . | PA: ARHGAP2  | exonic   | NM_.       | mis ARHGA   |
| ACa03 | 17 | #### | .         | A | G | . | PA: ARHGAP2  | intronic | NM_.       | .           |
| ACa03 | 17 | #### | rs8679073 | A | T | . | PA: GSDMA    | intronic | NM_.       | .           |
| ACa03 | 17 | #### | .         | G | A | . | PA:.         | intergen | NM_dist=.  | .           |
| ACa03 | 17 | #### | .         | G | A | . | PA: KANSL1   | intronic | NM_.       | .           |
| ACa03 | 17 | #### | rs7651139 | C | T | . | PA: CACNG5   | exonic   | NM_.       | mis CACNG   |

|       |    |      |           |   |   |   |             |           |           |     |        |
|-------|----|------|-----------|---|---|---|-------------|-----------|-----------|-----|--------|
| ACa03 | 17 | #### | rs7754213 | G | A | . | PA:MYO15B   | ncRNA_NR_ | .         | .   |        |
| ACa03 | 17 | #### | .         | G | A | . | PA:MGAT5B   | intronic  | NM_       | .   | .      |
| ACa03 | 17 | #### | rs5408783 | C | T | . | PA: 9-Sep   | intronic  | NM_       | .   | .      |
| ACa03 | 17 | #### | .         | G | A | . | PA:CCDC137  | exonic    | NM_       | syr | CCDC1  |
| ACa03 | 17 | #### | .         | C | T | . | PA:GCGR     | intronic  | NM_       | .   | .      |
| ACa03 | 17 | #### | rs3732207 | C | T | . | PA:FASN     | intronic  | NM_       | .   | .      |
| ACa03 | 18 | #### | .         | C | T | . | PA:CIDEA    | exonic    | NM_       | syr | CIDEA: |
| ACa03 | 19 | #### | rs7575217 | C | T | . | PA:SEMA6B   | exonic    | NM_       | syr | SEMA6  |
| ACa03 | 19 | #### | .         | G | A | . | PA:KHSRP    | intronic  | NM_       | .   | .      |
| ACa03 | 19 | #### | .         | G | T | . | PA:XAB2     | intronic  | NM_       | .   | .      |
| ACa03 | 19 | #### | .         | G | T | . | PA:TIMM44   | intronic  | NM_       | .   | .      |
| ACa03 | 19 | #### | .         | C | A | . | PA:FBN3     | intronic  | NM_       | .   | .      |
| ACa03 | 19 | #### | rs1492924 | G | A | . | PA:.        | intergen  | NM_dist=  | .   | .      |
| ACa03 | 19 | #### | rs1999730 | T | C | . | PA:CEP89    | intronic  | NM_       | .   | .      |
| ACa03 | 19 | #### | rs3762437 | G | T | . | PA:.        | intergen  | NR_dist=  | .   | .      |
| ACa03 | 19 | #### | rs7125437 | C | G | . | PA:.        | intergen  | NR_dist=  | .   | .      |
| ACa03 | 19 | #### | .         | C | T | . | PA:SPTBN4   | exonic    | NM_       | syr | SPTBN  |
| ACa03 | 19 | #### | .         | A | C | . | PA:EXOSC5   | intronic  | NM_       | .   | .      |
| ACa03 | 19 | #### | .         | C | G | . | PA:.        | intergen  | NM_dist=  | .   | .      |
| ACa03 | 19 | #### | .         | C | A | . | PA:PLA2G4C  | exonic    | NM_       | mi  | PLA2G4 |
| ACa03 | 19 | #### | rs6212787 | C | A | . | PA:CGB8     | intronic  | NM_       | .   | .      |
| ACa03 | 19 | #### | .         | A | C | . | PA:KLK15    | intronic  | NM_       | .   | .      |
| ACa03 | 19 | #### | rs5492748 | T | C | . | PA:TPM3P9   | ncRNA_NR_ | .         | .   |        |
| ACa03 | 19 | #### | .         | T | C | . | PA:.        | downstr   | NR_       | .   | .      |
| ACa03 | 19 | #### | rs7600928 | G | A | . | PA:PRKCG    | exonic    | NM_       | syr | PRKCG  |
| ACa03 | 19 | #### | .         | G | T | . | PA:ZNF211   | intronic  | NM_       | .   | .      |
| ACa03 | 19 | #### | rs7704038 | T | G | . | PA:ZNF814   | exonic    | NM_       | mi  | ZNF814 |
| ACa03 | 19 | #### | .         | C | T | . | PA:MZF1-AS1 | ncRNA_NR_ | .         | .   |        |
| ACa03 | 20 | #### | .         | C | T | . | PA:TGM6     | intronic  | NM_       | .   | .      |
| ACa03 | 20 | #### | .         | G | T | . | PA:.        | intergen  | NM_dist=  | .   | .      |
| ACa03 | 20 | #### | .         | C | A | . | PA:MIR663A1 | ncRNA_NR_ | .         | .   |        |
| ACa03 | 20 | #### | rs9569348 | A | G | . | PA:FRG1B    | ncRNA_NR_ | .         | .   |        |
| ACa03 | 20 | #### | .         | C | A | . | PA:WFDC2    | intronic  | NM_       | .   | .      |
| ACa03 | 21 | #### | rs3772733 | C | T | . | PA:.        | intergen  | NR_dist=  | .   | .      |
| ACa03 | 21 | #### | rs9184726 | C | T | . | PA:BAGE,BA1 | intronic  | NM_       | .   | .      |
| ACa03 | 21 | #### | rs9266067 | A | G | . | PA:.        | intergen  | NM_dist=  | .   | .      |
| ACa03 | 21 | #### | .         | G | A | . | PA:.        | intergen  | NM_dist=  | .   | .      |
| ACa03 | 21 | #### | .         | C | T | . | PA:DONSON   | intronic  | NM_       | .   | .      |
| ACa03 | 21 | #### | rs7967544 | T | G | . | PA:LOC10013 | ncRNA_NR_ | .         | .   |        |
| ACa03 | 22 | #### | rs2019683 | C | T | . | PA:.        | intergen  | NM_dist=  | .   | .      |
| ACa03 | 22 | #### | rs7543647 | C | T | . | PA:LZTR1    | intronic  | NM_       | .   | .      |
| ACa03 | 22 | #### | rs5711604 | G | A | . | PA:TTC28-AS | ncRNA_NR_ | .         | .   |        |
| ACa03 | 22 | #### | rs1856371 | C | T | . | PA:.        | intergen  | NM_dist=  | .   | .      |
| ACa03 | 22 | #### | rs3713772 | C | T | . | PA:MCM5     | exonic    | NM_       | syr | MCM5:l |
| ACa03 | 22 | #### | .         | G | A | . | PA:TMEM184  | intronic  | NM_       | .   | .      |
| ACa03 | 22 | #### | .         | G | A | . | PA:NPTXR    | UTR3      | NM_NM_    | .   | .      |
| ACa03 | 22 | #### | .         | C | A | . | PA:LINC0089 | ncRNA_NR_ | .         | .   |        |
| ACa03 | X  | #### | rs6644312 | G | T | . | PA:.        | intergen  | NM_dist=  | .   | .      |
| ACa03 | X  | #### | rs2010857 | T | C | . | PA:SHROOM   | intronic  | NM_       | .   | .      |
| ACa03 | X  | #### | .         | C | T | . | PA:WWC3     | exonic    | NM_       | mi  | WWC3:  |
| ACa03 | X  | #### | rs7457127 | C | T | . | PA:SRPX     | exonic    | NM_       | mi  | SRPX:M |
| ACa03 | X  | #### | .         | G | A | . | PA:WAS      | intronic  | NM_       | .   | .      |
| ACa03 | X  | #### | rs7825308 | G | A | . | PA:CACNA1F  | exonic    | NM_       | mi  | CACNA  |
| ACa03 | X  | #### | .         | G | C | . | PA:.        | intergen  | NOI dist= | .   | .      |

|       |    |      |           |   |   |   |             |            |           |        |         |
|-------|----|------|-----------|---|---|---|-------------|------------|-----------|--------|---------|
| ACa03 | X  | #### | .         | T | C | . | PA:.        | intergen   | NOI       | dist=. | .       |
| ACa03 | X  | #### | rs7756689 | A | G | . | PA:.        | intergen   | NOI       | dist=. | .       |
| ACa03 | X  | #### | rs2486782 | A | T | . | PA:CHIC1    | intronic   | NM_.      | .      | .       |
| ACa03 | X  | #### | .         | G | A | . | PA:AMOT     | exonic     | NM_.      | mis    | AMOT:!  |
| ACa03 | X  | #### | .         | T | C | . | PA:C1GALT1  | exonic     | NM_.      | mis    | C1GAL!  |
| ACa03 | X  | #### | .         | C | T | . | PA:.        | upstream   | NM_.      | .      | .       |
| ACa03 | X  | #### | rs1016097 | C | A | . | PA:MCF2     | intronic   | NM_.      | .      | .       |
| ACa03 | X  | #### | .         | G | A | . | PA:NSDHL    | intronic   | NM_.      | .      | .       |
| ACa03 | X  | #### | rs7802961 | G | A | . | PA:.        | intergen   | NM_dist=. | .      | .       |
| ACa03 | MT | 4451 | .         | T | C | . | PA:.        | intergen   | NOI       | dist=. | .       |
| ACa03 | MT | 5777 | rs3868289 | G | A | . | PA:.        | intergen   | NOI       | dist=. | .       |
| ACa03 | MT | #### | .         | C | A | . | PA:.        | intergen   | NOI       | dist=. | .       |
| ACa04 | 1  | #### | rs7466465 | C | T | . | PA:ATAD3C   | exonic     | NM_.      | syr    | ATAD3!  |
| ACa04 | 1  | #### | .         | C | G | . | PA:CDK11B   | intronic   | NM_.      | .      | .       |
| ACa04 | 1  | #### | rs1454709 | C | T | . | PA:FBXO2    | exonic     | NM_.      | mis    | FBXO2!  |
| ACa04 | 1  | #### | .         | C | T | . | PA:MAD2L2   | exonic     | NM_.      | mis    | MAD2L!  |
| ACa04 | 1  | #### | rs1440990 | G | A | . | PA:PRAMEF2  | UTR3       | NM_NM_.   | .      | .       |
| ACa04 | 1  | #### | rs1157686 | G | C | . | PA:.        | intergen   | NM_dist=. | .      | .       |
| ACa04 | 1  | #### | .         | T | A | . | PA:.        | upstream   | NR_.      | .      | .       |
| ACa04 | 1  | #### | rs7511577 | C | T | . | PA:.        | intergen   | NM_dist=. | .      | .       |
| ACa04 | 1  | #### | .         | G | C | . | PA:SH2D5    | exonic     | NM_.      | mis    | SH2D5:  |
| ACa04 | 1  | #### | rs5551428 | C | T | . | PA:TCEA3    | intronic   | NM_.      | .      | .       |
| ACa04 | 1  | #### | rs1422489 | G | A | . | PA:GRHL3    | exonic     | NM_.      | mis    | GRHL3   |
| ACa04 | 1  | #### | .         | G | A | . | PA:RHD      | intronic   | NM_.      | .      | .       |
| ACa04 | 1  | #### | .         | G | A | . | PA:COL16A1  | intronic   | NM_.      | .      | .       |
| ACa04 | 1  | #### | rs7753177 | G | A | . | PA:RNF19B   | exonic     | NM_.      | un!    | UNKNC   |
| ACa04 | 1  | #### | .         | C | T | . | PA:SNIP1    | exonic     | NM_.      | mis    | SNIP1:! |
| ACa04 | 1  | #### | .         | G | C | . | PA:MACF1    | exonic     | NM_.      | mis    | MACF1   |
| ACa04 | 1  | #### | .         | G | T | . | PA:MACF1    | intronic   | NM_.      | .      | .       |
| ACa04 | 1  | #### | .         | G | T | . | PA:MACF1    | intronic   | NM_.      | .      | .       |
| ACa04 | 1  | #### | .         | G | C | . | PA:MACF1    | intronic   | NM_.      | .      | .       |
| ACa04 | 1  | #### | .         | A | G | . | PA:SCMH1    | intronic   | NM_.      | .      | .       |
| ACa04 | 1  | #### | rs7580073 | C | T | . | PA:KLF17    | exonic     | NM_.      | mis    | KLF17:! |
| ACa04 | 1  | #### | rs8662033 | C | A | . | PA:.        | intergen   | NM_dist=. | .      | .       |
| ACa04 | 1  | #### | .         | C | T | . | PA:CYB5RL   | intronic   | NM_.      | .      | .       |
| ACa04 | 1  | #### | .         | C | G | . | PA:INADL    | intronic   | NM_.      | .      | .       |
| ACa04 | 1  | #### | .         | G | A | . | PA:.        | intergen   | NR_dist=. | .      | .       |
| ACa04 | 1  | #### | .         | G | A | . | PA:FPGT-TNI | intronic   | NM_.      | .      | .       |
| ACa04 | 1  | #### | .         | G | A | . | PA:EVI5     | intronic   | NM_.      | .      | .       |
| ACa04 | 1  | #### | .         | C | A | . | PA:ABCA4    | intronic   | NM_.      | .      | .       |
| ACa04 | 1  | #### | .         | G | A | . | PA:SNX7     | intronic   | NM_.      | .      | .       |
| ACa04 | 1  | #### | rs7598590 | G | A | . | PA:CD53     | intronic   | NM_.      | .      | .       |
| ACa04 | 1  | #### | .         | G | A | . | PA:LOC6433! | exonic     | NM_.      | syr    | LOC64!  |
| ACa04 | 1  | #### | rs2004173 | G | A | . | PA:FCGR1B   | UTR3       | NM_NM_.   | .      | .       |
| ACa04 | 1  | #### | rs1043712 | C | T | . | PA:.        | intergen   | NOI       | dist=. | .       |
| ACa04 | 1  | #### | .         | C | T | . | PA:.        | intergen   | NR_dist=. | .      | .       |
| ACa04 | 1  | #### | rs2002777 | G | A | . | PA:.        | intergen   | NR_dist=. | .      | .       |
| ACa04 | 1  | #### | rs7506054 | A | G | . | PA:.        | intergen   | NR_dist=. | .      | .       |
| ACa04 | 1  | #### | rs1694653 | C | G | . | PA:.        | intergen   | NR_dist=. | .      | .       |
| ACa04 | 1  | #### | rs4125366 | A | T | . | PA:NBPF20,N | intronic   | NM_.      | .      | .       |
| ACa04 | 1  | #### | .         | T | G | . | PA:NBPF25P  | ncRNA_NR_. | .         | .      | .       |
| ACa04 | 1  | #### | .         | A | G | . | PA:NBPF25P  | ncRNA_NR_. | .         | .      | .       |
| ACa04 | 1  | #### | rs6181199 | G | A | . | PA:NBPF11,N | intronic   | NM_.      | .      | .       |
| ACa04 | 1  | #### | rs8799948 | C | A | . | PA:NBPF8    | intronic   | NM_.      | .      | .       |

|       |   |      |           |   |   |   |             |                  |     |          |
|-------|---|------|-----------|---|---|---|-------------|------------------|-----|----------|
| ACa04 | 1 | #### | rs482979  | C | T | . | PA:NBPF25P  | ncRNA_NR_        | .   | .        |
| ACa04 | 1 | #### | rs2021032 | T | G | . | PA:NBPF25P  | ncRNA_NR_        | .   | .        |
| ACa04 | 1 | #### | rs2009700 | C | G | . | PA:NBPF25P  | ncRNA_NR_        | .   | .        |
| ACa04 | 1 | #### | rs2003739 | G | A | . | PA:NBPF25P  | ncRNA_NR_        | .   | .        |
| ACa04 | 1 | #### | rs3705433 | G | A | . | PA:NBPF25P  | ncRNA_NR_        | .   | .        |
| ACa04 | 1 | #### | rs226753  | G | C | . | PA:NBPF25P  | ncRNA_NR_        | .   | .        |
| ACa04 | 1 | #### | .         | G | A | . | PA:NBPF25P  | ncRNA_NR_        | .   | .        |
| ACa04 | 1 | #### | rs2787777 | C | T | . | PA:.        | intergenNR_dist= | .   | .        |
| ACa04 | 1 | #### | rs3750007 | T | A | . | PA:.        | downstrNM_       | .   | .        |
| ACa04 | 1 | #### | .         | C | T | . | PA:.        | intergenNM_dist= | .   | .        |
| ACa04 | 1 | #### | .         | C | G | . | PA:INTS3    | intronicNM_      | .   | .        |
| ACa04 | 1 | #### | .         | C | A | . | PA:SLC27A3  | intronicNM_      | .   | .        |
| ACa04 | 1 | #### | .         | A | T | . | PA:SLC50A1  | exonicNM_        | syr | SLC50A1  |
| ACa04 | 1 | #### | .         | G | T | . | PA:ARHGEF2  | intronicNM_      | .   | .        |
| ACa04 | 1 | #### | .         | C | T | . | PA:PEAR1    | intronicNM_      | .   | .        |
| ACa04 | 1 | #### | .         | C | T | . | PA:PEAR1    | exonicNM_        | syr | PEAR1    |
| ACa04 | 1 | #### | .         | C | T | . | PA:TNFSF4   | intronicNM_      | .   | .        |
| ACa04 | 1 | #### | .         | C | G | . | PA:ASPM     | exonicNM_        | mis | ASPM     |
| ACa04 | 1 | #### | rs1997462 | G | A | . | PA:KIF21B   | intronicNM_      | .   | .        |
| ACa04 | 1 | #### | rs3692540 | G | A | . | PA:PLEKHA6  | exonicNM_        | mis | PLEKHA6  |
| ACa04 | 1 | #### | .         | G | A | . | PA:C1orf115 | exonicNM_        | mis | C1orf115 |
| ACa04 | 1 | #### | .         | C | T | . | PA:CAPN2    | exonicNM_        | mis | CAPN2    |
| ACa04 | 1 | #### | .         | G | A | . | PA:.        | intergenNM_dist= | .   | .        |
| ACa04 | 1 | #### | rs7793949 | G | A | . | PA:OBSCN    | intronicNM_      | .   | .        |
| ACa04 | 2 | #### | .         | C | T | . | PA:ASAP2    | UTR5NM_NM_       | .   | .        |
| ACa04 | 2 | #### | .         | C | G | . | PA:TAF1B    | intronicNM_      | .   | .        |
| ACa04 | 2 | #### | .         | G | C | . | PA:SF3B6    | exonicNM_        | syr | SF3B6    |
| ACa04 | 2 | #### | .         | G | C | . | PA:CAD      | intronicNM_      | .   | .        |
| ACa04 | 2 | #### | .         | C | A | . | PA:.        | intergenNM_dist= | .   | .        |
| ACa04 | 2 | #### | .         | C | T | . | PA:SLC3A1   | exonicNM_        | syr | SLC3A1   |
| ACa04 | 2 | #### | .         | C | T | . | PA:SLC3A1,P | UTR3NM_NM_       | .   | .        |
| ACa04 | 2 | #### | .         | A | G | . | PA:RHOQ     | intronicNM_      | .   | .        |
| ACa04 | 2 | #### | .         | C | G | . | PA:.        | intergenNM_dist= | .   | .        |
| ACa04 | 2 | #### | .         | C | G | . | PA:ARHGAP2  | intronicNM_      | .   | .        |
| ACa04 | 2 | #### | .         | C | T | . | PA:DYSF     | intronicNM_      | .   | .        |
| ACa04 | 2 | #### | rs3764475 | C | T | . | PA:RETSAT   | intronicNM_      | .   | .        |
| ACa04 | 2 | #### | rs1425097 | C | T | . | PA:PTCD3    | exonicNM_        | syr | PTCD3    |
| ACa04 | 2 | #### | .         | C | T | . | PA:.        | downstrNM_       | .   | .        |
| ACa04 | 2 | #### | .         | G | A | . | PA:RNF103-C | intronicNM_      | .   | .        |
| ACa04 | 2 | #### | rs8671368 | A | G | . | PA:RGPD2,R  | intronicNM_      | .   | .        |
| ACa04 | 2 | #### | rs8674281 | C | A | . | PA:RGPD1,R  | intronicNM_      | .   | .        |
| ACa04 | 2 | #### | .         | C | T | . | PA:LOC28507 | ncRNA_NR_        | .   | .        |
| ACa04 | 2 | #### | rs1210470 | G | A | . | PA:.        | intergenNR_dist= | .   | .        |
| ACa04 | 2 | #### | rs2015850 | T | C | . | PA:.        | intergenNM_dist= | .   | .        |
| ACa04 | 2 | #### | .         | C | T | . | PA:SLC9A2   | exonicNM_        | syr | SLC9A2   |
| ACa04 | 2 | #### | .         | G | A | . | PA:ACOXL    | intronicNM_      | .   | .        |
| ACa04 | 2 | #### | .         | G | C | . | PA:POLR1B   | intronicNM_      | .   | .        |
| ACa04 | 2 | #### | rs6216365 | A | T | . | PA:INSIG2   | intronicNM_      | .   | .        |
| ACa04 | 2 | #### | .         | C | T | . | PA:IWS1     | UTR5NM_NM_       | .   | .        |
| ACa04 | 2 | #### | .         | C | T | . | PA:POTEF    | intronicNM_      | .   | .        |
| ACa04 | 2 | #### | rs1839843 | T | C | . | PA:POTEF    | exonicNM_        | syr | POTEF    |
| ACa04 | 2 | #### | rs2001821 | A | G | . | PA:POTEE    | intronicNM_      | .   | .        |
| ACa04 | 2 | #### | .         | C | T | . | PA:LOC40107 | ncRNA_NR_        | .   | .        |
| ACa04 | 2 | #### | .         | G | T | . | PA:RPRM     | UTR3NM_NM_       | .   | .        |

|       |   |      |           |   |   |   |             |           |          |     |         |
|-------|---|------|-----------|---|---|---|-------------|-----------|----------|-----|---------|
| ACa04 | 2 | #### | .         | G | C | . | PA:WDSUB1   | intronic  | NM_      | .   | .       |
| ACa04 | 2 | #### | .         | T | G | . | PA:.        | intergen  | NM_dist= | .   | .       |
| ACa04 | 2 | #### | .         | C | T | . | PA:CCDC141  | exonic    | NM_      | mis | CCDC1   |
| ACa04 | 2 | #### | .         | T | G | . | PA:GTF3C3   | intronic  | NM_      | .   | .       |
| ACa04 | 2 | #### | .         | T | C | . | PA:CPS1     | intronic  | NM_      | .   | .       |
| ACa04 | 2 | #### | .         | C | T | . | PA:TMEM169  | intronic  | NM_      | .   | .       |
| ACa04 | 2 | #### | .         | G | A | . | PA:SP140    | exonic    | NM_      | mis | SP140:l |
| ACa04 | 2 | #### | .         | G | A | . | PA:SP140    | intronic  | NM_      | .   | .       |
| ACa04 | 2 | #### | .         | C | T | . | PA:HDAC4    | intronic  | NM_      | .   | .       |
| ACa04 | 3 | #### | .         | G | A | . | PA:.        | intergen  | NM_dist= | .   | .       |
| ACa04 | 3 | #### | .         | G | A | . | PA:ZFYVE20  | intronic  | NM_      | .   | .       |
| ACa04 | 3 | #### | .         | G | A | . | PA:CAPN7    | intronic  | NM_      | .   | .       |
| ACa04 | 3 | #### | .         | G | T | . | PA:OSBPL10  | intronic  | NM_      | .   | .       |
| ACa04 | 3 | #### | .         | C | G | . | PA:DYNC1LI1 | exonic    | NM_      | mis | DYNC1   |
| ACa04 | 3 | #### | .         | C | T | . | PA:NBEAL2   | intronic  | NM_      | .   | .       |
| ACa04 | 3 | #### | .         | G | A | . | PA:KIF9-AS1 | ncRNA_NR_ | .        | .   |         |
| ACa04 | 3 | #### | .         | C | T | . | PA:NDUFAF3  | exonic    | NM_      | syr | NDUFA   |
| ACa04 | 3 | #### | .         | C | T | . | PA:NPRL2    | exonic    | NM_      | mis | NPRL2:  |
| ACa04 | 3 | #### | .         | G | A | . | PA:CACNA2C  | intronic  | NM_      | .   | .       |
| ACa04 | 3 | #### | rs7801345 | C | T | . | PA:STAB1    | intronic  | NM_      | .   | .       |
| ACa04 | 3 | #### | rs3677973 | G | A | . | PA:ITIH3    | exonic    | NM_      | mis | ITIH3:N |
| ACa04 | 3 | #### | rs7454520 | G | A | . | PA:WNT5A    | intronic  | NM_      | .   | .       |
| ACa04 | 3 | #### | .         | A | T | . | PA:EPHA6    | intronic  | NM_      | .   | .       |
| ACa04 | 3 | #### | rs1911937 | G | A | . | PA:MIR548G  | ncRNA_NR_ | .        | .   |         |
| ACa04 | 3 | #### | .         | C | T | . | PA:ZNF80    | exonic    | NM_      | mis | ZNF80:  |
| ACa04 | 3 | #### | .         | C | G | . | PA:GPR156   | exonic    | NM_      | mis | GPR156  |
| ACa04 | 3 | #### | .         | C | T | . | PA:SEMA5B   | intronic  | NM_      | .   | .       |
| ACa04 | 3 | #### | .         | C | T | . | PA:H1FX     | exonic    | NM_      | mis | H1FX:N  |
| ACa04 | 3 | #### | .         | C | T | . | PA:RPL32P3  | ncRNA_NR_ | .        | .   |         |
| ACa04 | 3 | #### | .         | C | T | . | PA:MBD4     | exonic    | NM_      | mis | MBD4:M  |
| ACa04 | 3 | #### | .         | C | T | . | PA:MBD4     | intronic  | NM_      | .   | .       |
| ACa04 | 3 | #### | .         | G | A | . | PA:COL6A5   | exonic    | NM_      | syr | COL6A5  |
| ACa04 | 3 | #### | .         | C | T | . | PA:ATP2C1   | exonic    | NM_      | syr | ATP2C1  |
| ACa04 | 3 | #### | rs1469630 | G | A | . | PA:NME9     | intronic  | NM_      | .   | .       |
| ACa04 | 3 | #### | .         | C | A | . | PA:FOXL2    | exonic    | NM_      | sto | FOXL2:  |
| ACa04 | 3 | #### | .         | G | A | . | PA:GRK7     | exonic    | NM_      | syr | GRK7:M  |
| ACa04 | 3 | #### | .         | T | G | . | PA:ATR      | intronic  | NM_      | .   | .       |
| ACa04 | 3 | #### | rs7613736 | G | C | . | PA:P2RY12,M | intronic  | NM_      | .   | .       |
| ACa04 | 3 | #### | .         | C | T | . | PA:MLF1     | intronic  | NM_      | .   | .       |
| ACa04 | 3 | #### | .         | G | A | . | PA:ZBBX     | intronic  | NM_      | .   | .       |
| ACa04 | 3 | #### | .         | G | C | . | PA:SLC2A2   | exonic    | NM_      | syr | SLC2A2  |
| ACa04 | 3 | #### | .         | C | T | . | PA:FNDC3B   | exonic    | NM_      | syr | FNDC3   |
| ACa04 | 3 | #### | .         | C | G | . | PA:HTR3E    | exonic    | NM_      | mis | HTR3E:  |
| ACa04 | 3 | #### | .         | G | A | . | PA:SENP2    | intronic  | NM_      | .   | .       |
| ACa04 | 3 | #### | .         | G | A | . | PA:RFC4     | intronic  | NM_      | .   | .       |
| ACa04 | 3 | #### | .         | C | T | . | PA:HRASLS   | intronic  | NM_      | .   | .       |
| ACa04 | 3 | #### | rs8795450 | C | T | . | PA:.        | intergen  | NM_dist= | .   | .       |
| ACa04 | 3 | #### | .         | C | T | . | PA:.        | intergen  | NM_dist= | .   | .       |
| ACa04 | 3 | #### | rs4927838 | G | A | . | PA:SDHAP1   | ncRNA_NR_ | .        | .   |         |
| ACa04 | 3 | #### | rs1739998 | C | T | . | PA:SDHAP1   | ncRNA_NR_ | .        | .   |         |
| ACa04 | 4 | #### | rs4022005 | C | T | . | PA:ZNF595,Z | intronic  | NM_      | .   | .       |
| ACa04 | 4 | #### | rs7518089 | C | T | . | PA:SLC26A1  | exonic    | NM_      | syr | SLC26A1 |
| ACa04 | 4 | #### | rs7529426 | G | A | . | PA:PPARGC1  | exonic    | NM_      | mis | PPARG   |
| ACa04 | 4 | #### | .         | G | A | . | PA:.        | intergen  | NR_dist= | .   | .       |

|       |   |      |           |   |   |   |             |            |           |            |
|-------|---|------|-----------|---|---|---|-------------|------------|-----------|------------|
| ACa04 | 4 | #### | .         | G | A | . | PA:N4BP2    | splicing   | NM_NM_.   | .          |
| ACa04 | 4 | #### | .         | C | G | . | PA:LIMCH1   | exonic     | NM_.      | mis LIMCH1 |
| ACa04 | 4 | #### | rs7541707 | G | T | . | PA:.        | intergen   | NM_dist=. | .          |
| ACa04 | 4 | #### | .         | G | A | . | PA:AASDH    | intronic   | NM_.      | .          |
| ACa04 | 4 | #### | rs5423520 | C | T | . | PA:MTHFD2L  | intronic   | NM_.      | .          |
| ACa04 | 4 | #### | .         | G | C | . | PA:ANXA3    | intronic   | NM_.      | .          |
| ACa04 | 4 | #### | rs8789415 | C | A | . | PA:CISD2    | UTR3       | NM_NM_.   | .          |
| ACa04 | 4 | #### | rs8900187 | C | T | . | PA:COL25A1  | intronic   | NM_.      | .          |
| ACa04 | 4 | #### | .         | G | A | . | PA:SNHG8    | ncRNA_NR_. | .         | .          |
| ACa04 | 4 | #### | rs1378897 | A | T | . | PA:MFS8     | intronic   | NM_.      | .          |
| ACa04 | 4 | #### | .         | G | C | . | PA:PCDH10   | exonic     | NM_.      | mis PCDH1  |
| ACa04 | 4 | #### | rs3676041 | A | G | . | PA:GYPB     | intronic   | NM_.      | .          |
| ACa04 | 4 | #### | .         | T | G | . | PA:GUCY1A3  | intronic   | NM_.      | .          |
| ACa04 | 4 | #### | .         | T | C | . | PA:NEK1     | intronic   | NM_.      | .          |
| ACa04 | 4 | #### | .         | G | C | . | PA:.        | upstream   | NR_.      | .          |
| ACa04 | 5 | #### | .         | G | A | . | PA:PDCD6    | exonic     | NM_.      | mis PDCD6  |
| ACa04 | 5 | #### | .         | C | T | . | PA:LINC0119 | ncRNA_NR_. | .         | .          |
| ACa04 | 5 | #### | .         | G | A | . | PA:GHR      | intronic   | NM_.      | .          |
| ACa04 | 5 | #### | .         | A | C | . | PA:ANKRD55  | intronic   | NM_.      | .          |
| ACa04 | 5 | #### | .         | G | A | . | PA:.        | intergen   | NM_dist=. | .          |
| ACa04 | 5 | #### | .         | T | A | . | PA:MAST4    | intronic   | NM_.      | .          |
| ACa04 | 5 | #### | .         | C | T | . | PA:.        | intergen   | NM_dist=. | .          |
| ACa04 | 5 | #### | .         | G | C | . | PA:GTF2H2B  | ncRNA_NR_. | .         | .          |
| ACa04 | 5 | #### | rs2848141 | C | T | . | PA:.        | intergen   | NR_dist=. | .          |
| ACa04 | 5 | #### | .         | C | T | . | PA:HEXB     | splicing   | NM_NM_.   | .          |
| ACa04 | 5 | #### | .         | C | T | . | PA:HEXB     | exonic     | NM_.      | sto HEXB:N |
| ACa04 | 5 | #### | .         | C | T | . | PA:HSD17B4  | exonic     | NM_.      | mis HSD17B |
| ACa04 | 5 | #### | .         | C | A | . | PA:HARS     | intronic   | NM_.      | .          |
| ACa04 | 5 | #### | .         | C | A | . | PA:HARS     | intronic   | NM_.      | .          |
| ACa04 | 5 | #### | rs1024566 | A | C | . | PA:G3BP1    | intronic   | NM_.      | .          |
| ACa04 | 5 | #### | .         | C | T | . | PA:GLRA1    | intronic   | NM_.      | .          |
| ACa04 | 5 | #### | .         | G | C | . | PA:ADAM19   | intronic   | NM_.      | .          |
| ACa04 | 5 | #### | .         | G | A | . | PA:EBF1     | intronic   | NM_.      | .          |
| ACa04 | 5 | #### | rs5341551 | G | A | . | PA:TENM2    | intronic   | NM_.      | .          |
| ACa04 | 5 | #### | .         | C | T | . | PA:EIF4E1B  | intronic   | NM_.      | .          |
| ACa04 | 5 | #### | .         | G | C | . | PA:CBY3     | exonic     | NM_.      | syr CBY3:N |
| ACa04 | 6 | #### | rs2013466 | C | G | . | PA:DUSP22   | exonic     | NM_.      | mis DUSP2  |
| ACa04 | 6 | #### | .         | C | G | . | PA:BPHL     | intronic   | NM_.      | .          |
| ACa04 | 6 | #### | .         | C | G | . | PA:CDYL     | exonic     | NM_.      | mis CDYL:N |
| ACa04 | 6 | #### | rs7489137 | G | A | . | PA:HIST1H2E | exonic     | NM_.      | syr HIST1H |
| ACa04 | 6 | #### | .         | C | T | . | PA:POM121L  | exonic     | NM_.      | mis POM12  |
| ACa04 | 6 | #### | .         | C | G | . | PA:POM121L  | exonic     | NM_.      | mis POM12  |
| ACa04 | 6 | #### | rs9402071 | C | T | . | PA:PGBD1    | intronic   | NM_.      | .          |
| ACa04 | 6 | #### | .         | G | C | . | PA:DHX16    | exonic     | NM_.      | syr DHX16: |
| ACa04 | 6 | #### | .         | G | C | . | PA:DHX16    | intronic   | NM_.      | .          |
| ACa04 | 6 | #### | .         | G | A | . | PA:.        | upstream   | NM_.      | .          |
| ACa04 | 6 | #### | .         | G | A | . | PA:TNF      | intronic   | NM_.      | .          |
| ACa04 | 6 | #### | .         | G | A | . | PA:ZBTB12   | exonic     | NM_.      | syr ZBTB12 |
| ACa04 | 6 | #### | .         | C | T | . | PA:STK19    | exonic     | NM_.      | mis STK19: |
| ACa04 | 6 | #### | rs5421901 | C | T | . | PA:CYP21A11 | ncRNA_NR_. | .         | .          |
| ACa04 | 6 | #### | .         | C | T | . | PA:CYP21A2  | exonic     | NM_.      | unl UNKNC  |
| ACa04 | 6 | #### | .         | C | T | . | PA:CYP21A11 | ncRNA_NR_. | .         | .          |
| ACa04 | 6 | #### | .         | C | A | . | PA:ETV7     | exonic     | NM_.      | syr ETV7:N |
| ACa04 | 6 | #### | .         | T | G | . | PA:CMTR1    | intronic   | NM_.      | .          |

|       |   |      |           |   |   |   |             |            |           |     |          |
|-------|---|------|-----------|---|---|---|-------------|------------|-----------|-----|----------|
| ACa04 | 6 | #### | rs3746609 | A | C | . | PA:AARS2    | intronic   | NM_.      | .   | .        |
| ACa04 | 6 | #### | rs5482384 | C | T | . | PA:GPR116   | exonic     | NM_.      | mis | GPR116   |
| ACa04 | 6 | #### | rs1442276 | G | A | . | PA:DEFB112  | exonic     | NM_.      | mis | DEFB112  |
| ACa04 | 6 | #### | rs9008212 | C | G | . | PA:TTK      | intronic   | NM_.      | .   | .        |
| ACa04 | 6 | #### | .         | C | T | . | PA:CASP8AP  | intronic   | NM_.      | .   | .        |
| ACa04 | 6 | #### | rs7466151 | C | T | . | PA:AK9      | intronic   | NM_.      | .   | .        |
| ACa04 | 6 | #### | .         | C | T | . | PA:CEP85L   | exonic     | NM_.      | mis | CEP85L   |
| ACa04 | 6 | #### | rs5411063 | G | A | . | PA:.        | intergen   | NM_dist=. | .   | .        |
| ACa04 | 6 | #### | .         | G | C | . | PA:LOC10012 | ncRNA_NR_. | .         | .   | .        |
| ACa04 | 7 | #### | rs3695415 | G | A | . | PA:INTS1    | intronic   | NM_.      | .   | .        |
| ACa04 | 7 | #### | rs9183664 | C | T | . | PA:AP5Z1    | intronic   | NM_.      | .   | .        |
| ACa04 | 7 | #### | .         | G | T | . | PA:.        | intergen   | NM_dist=. | .   | .        |
| ACa04 | 7 | #### | .         | C | T | . | PA:.        | intergen   | NR_dist=. | .   | .        |
| ACa04 | 7 | #### | rs1485954 | C | T | . | PA:MYO1G    | intronic   | NM_.      | .   | .        |
| ACa04 | 7 | #### | rs3677059 | G | A | . | PA:.        | intergen   | NR_dist=. | .   | .        |
| ACa04 | 7 | #### | .         | C | G | . | PA:.        | intergen   | NR_dist=. | .   | .        |
| ACa04 | 7 | #### | .         | A | T | . | PA:.        | intergen   | NR_dist=. | .   | .        |
| ACa04 | 7 | #### | .         | T | C | . | PA:.        | intergen   | NR_dist=. | .   | .        |
| ACa04 | 7 | #### | rs2018986 | T | C | . | PA:.        | intergen   | NR_dist=. | .   | .        |
| ACa04 | 7 | #### | rs1860492 | C | T | . | PA:.        | intergen   | NR_dist=. | .   | .        |
| ACa04 | 7 | #### | .         | C | A | . | PA:.        | intergen   | NR_dist=. | .   | .        |
| ACa04 | 7 | #### | .         | G | C | . | PA:.        | intergen   | NR_dist=. | .   | .        |
| ACa04 | 7 | #### | rs2687038 | T | C | . | PA:TYW1     | intronic   | NM_.      | .   | .        |
| ACa04 | 7 | #### | .         | A | C | . | PA:WBSCR17  | intronic   | NM_.      | .   | .        |
| ACa04 | 7 | #### | .         | G | T | . | PA:HIP1     | intronic   | NM_.      | .   | .        |
| ACa04 | 7 | #### | .         | A | G | . | PA:.        | intergen   | NM_dist=. | .   | .        |
| ACa04 | 7 | #### | rs3730249 | G | A | . | PA:SRRT     | intronic   | NM_.      | .   | .        |
| ACa04 | 7 | #### | rs3721622 | G | A | . | PA:RBM28    | exonic     | NM_.      | mis | RBM28    |
| ACa04 | 7 | #### | .         | G | C | . | PA:RBM28    | exonic     | NM_.      | mis | RBM28    |
| ACa04 | 7 | #### | rs1030263 | C | T | . | PA:KCP      | intronic   | NM_.      | .   | .        |
| ACa04 | 7 | #### | .         | C | T | . | PA:.        | intergen   | NM_dist=. | .   | .        |
| ACa04 | 7 | #### | .         | G | C | . | PA:EZH2     | intronic   | NM_.      | .   | .        |
| ACa04 | 7 | #### | rs8678229 | G | T | . | PA:KMT2C    | intronic   | NM_.      | .   | .        |
| ACa04 | 8 | #### | .         | G | A | . | PA:.        | intergen   | NR_dist=. | .   | .        |
| ACa04 | 8 | #### | rs6264068 | C | T | . | PA:.        | intergen   | NR_dist=. | .   | .        |
| ACa04 | 8 | #### | .         | G | A | . | PA:BLK      | intronic   | NM_.      | .   | .        |
| ACa04 | 8 | #### | .         | A | G | . | PA:FAM86B1  | intronic   | NM_.      | .   | .        |
| ACa04 | 8 | #### | .         | G | A | . | PA:FAM86B2  | intronic   | NM_.      | .   | .        |
| ACa04 | 8 | #### | rs7607907 | C | T | . | PA:CHMP7    | exonic     | NM_.      | mis | CHMP7    |
| ACa04 | 8 | #### | .         | G | A | . | PA:NRG1     | exonic     | NM_.      | mis | NRG1:NM  |
| ACa04 | 8 | #### | rs3736343 | G | A | . | PA:RAB11FIF | exonic     | NM_.      | mis | RAB11FIF |
| ACa04 | 8 | #### | .         | C | T | . | PA:ATP6V1H  | intronic   | NM_.      | .   | .        |
| ACa04 | 8 | #### | .         | G | A | . | PA:TERF1    | exonic     | NM_.      | syr | TERF1:   |
| ACa04 | 8 | #### | rs9872967 | T | A | . | PA:HEY1     | UTR3       | NM_NM_.   | .   | .        |
| ACa04 | 8 | #### | .         | G | A | . | PA:.        | intergen   | NM_dist=. | .   | .        |
| ACa04 | 8 | #### | .         | G | A | . | PA:.        | intergen   | NM_dist=. | .   | .        |
| ACa04 | 8 | #### | .         | T | A | . | PA:.        | intergen   | NR_dist=. | .   | .        |
| ACa04 | 8 | #### | .         | G | C | . | PA:RGS22    | intronic   | NM_.      | .   | .        |
| ACa04 | 8 | #### | .         | G | A | . | PA:CSMD3    | intronic   | NM_.      | .   | .        |
| ACa04 | 8 | #### | .         | G | T | . | PA:TAF2     | exonic     | NM_.      | mis | TAF2:NM  |
| ACa04 | 8 | #### | .         | G | A | . | PA:.        | intergen   | NR_dist=. | .   | .        |
| ACa04 | 8 | #### | rs1436548 | G | C | . | PA:KIAA0196 | exonic     | NM_.      | mis | KIAA0196 |
| ACa04 | 8 | #### | .         | G | C | . | PA:KIAA0196 | intronic   | NM_.      | .   | .        |
| ACa04 | 8 | #### | .         | G | A | . | PA:TRAPPC9  | intronic   | NM_.      | .   | .        |

|       |    |      |           |   |   |   |             |                   |     |         |
|-------|----|------|-----------|---|---|---|-------------|-------------------|-----|---------|
| ACa04 | 9  | #### | .         | C | T | . | PA:LOC38970 | ncRNA_NR_         | .   | .       |
| ACa04 | 9  | #### | rs7682516 | C | T | . | PA:HAUS6    | exonic NM_        | miR | HAUS6   |
| ACa04 | 9  | #### | .         | C | T | . | PA:IFNB1    | exonic NM_        | miR | IFNB1:† |
| ACa04 | 9  | #### | .         | G | C | . | PA:UBAP2    | exonic NM_        | sto | UBAP2:  |
| ACa04 | 9  | #### | rs3764507 | T | C | . | PA:CNTNAP3  | intronic NM_      | .   | .       |
| ACa04 | 9  | #### | .         | C | G | . | PA:LOC10272 | intergen NR_dist= | .   | .       |
| ACa04 | 9  | #### | .         | G | C | . | PA:FAM27E3  | ncRNA_NR_         | .   | .       |
| ACa04 | 9  | #### | .         | G | A | . | PA:.        | intergen NM_dist= | .   | .       |
| ACa04 | 9  | #### | .         | C | G | . | PA:SMC5-AS  | ncRNA_NR_         | .   | .       |
| ACa04 | 9  | #### | .         | C | G | . | PA:VPS13A   | intronic NM_      | .   | .       |
| ACa04 | 9  | #### | .         | T | G | . | PA:TLE4     | intronic NM_      | .   | .       |
| ACa04 | 9  | #### | .         | G | C | . | PA:ERCC6L2  | exonic NM_        | miR | ERCC6   |
| ACa04 | 9  | #### | rs9619494 | C | T | . | PA:HSDL2    | splicing NM_NM_   | .   | .       |
| ACa04 | 9  | #### | .         | C | T | . | PA:DAB2IP   | exonic NM_        | syr | DAB2IF  |
| ACa04 | 9  | #### | .         | G | A | . | PA:LMX1B    | exonic NM_        | syr | LMX1B:  |
| ACa04 | 9  | #### | .         | G | A | . | PA:CERCAM   | intronic NM_      | .   | .       |
| ACa04 | 9  | #### | rs7589091 | C | T | . | PA:IER5L    | UTR3 NM_NM_       | .   | .       |
| ACa04 | 9  | #### | .         | C | A | . | PA:GPR107   | splicing NM_NM_   | .   | .       |
| ACa04 | 9  | #### | .         | G | T | . | PA:RAPGEF1  | intronic NM_      | .   | .       |
| ACa04 | 9  | #### | .         | C | T | . | PA:.        | intergen NM_dist= | .   | .       |
| ACa04 | 9  | #### | .         | C | T | . | PA:PNPLA7   | exonic NM_        | unl | UNKNC   |
| ACa04 | 10 | #### | .         | C | A | . | PA:UPF2     | exonic NM_        | sto | UPF2:N  |
| ACa04 | 10 | #### | rs2018361 | T | C | . | PA:SKIDA1   | exonic NM_        | syr | SKIDA1  |
| ACa04 | 10 | #### | .         | T | G | . | PA:RASSF4   | intronic NM_      | .   | .       |
| ACa04 | 10 | #### | .         | T | G | . | PA:RASSF4   | intronic NM_      | .   | .       |
| ACa04 | 10 | #### | .         | G | T | . | PA:HKDC1    | intronic NM_      | .   | .       |
| ACa04 | 10 | #### | rs3760330 | G | A | . | PA:HKDC1    | exonic NM_        | syr | HKDC1   |
| ACa04 | 10 | #### | .         | G | A | . | PA:HKDC1    | UTR3 NM_NM_       | .   | .       |
| ACa04 | 10 | #### | .         | G | C | . | PA:UNC5B    | splicing NM_NM_   | .   | .       |
| ACa04 | 10 | #### | rs7593379 | G | A | . | PA:UNC5B    | exonic NM_        | miR | UNC5B   |
| ACa04 | 10 | #### | rs7698966 | G | A | . | PA:CDH23    | exonic NM_        | syr | CDH23:  |
| ACa04 | 10 | #### | .         | C | T | . | PA:.        | intergen NM_dist= | .   | .       |
| ACa04 | 10 | #### | .         | A | G | . | PA:.        | intergen NM_dist= | .   | .       |
| ACa04 | 10 | #### | .         | C | G | . | PA:KIF11    | intronic NM_      | .   | .       |
| ACa04 | 10 | #### | .         | G | A | . | PA:PDCD11   | intronic NM_      | .   | .       |
| ACa04 | 10 | #### | .         | G | A | . | PA:PLEKHA1  | intronic NM_      | .   | .       |
| ACa04 | 10 | #### | rs7966467 | A | G | . | PA:.        | intergen NM_dist= | .   | .       |
| ACa04 | 11 | #### | rs7657851 | G | A | . | PA:MUC6     | exonic NM_        | syr | MUC6:†  |
| ACa04 | 11 | #### | rs8667539 | C | G | . | PA:.        | intergen NR_dist= | .   | .       |
| ACa04 | 11 | #### | .         | G | A | . | PA:SBF2     | exonic NM_        | miR | SBF2:N  |
| ACa04 | 11 | #### | .         | C | T | . | PA:LUZP2    | exonic NM_        | sto | LUZP2:  |
| ACa04 | 11 | #### | .         | C | T | . | PA:WT1      | exonic NM_        | miR | WT1:NI  |
| ACa04 | 11 | #### | .         | A | G | . | PA:DGKZ     | exonic NM_        | miR | DGKZ:†  |
| ACa04 | 11 | #### | .         | G | T | . | PA:ARFGAP2  | intronic NM_      | .   | .       |
| ACa04 | 11 | #### | .         | C | A | . | PA:.        | downstr NM_       | .   | .       |
| ACa04 | 11 | #### | rs7463740 | C | T | . | PA:PPP1R32  | exonic NM_        | miR | PPP1R:  |
| ACa04 | 11 | #### | .         | T | G | . | PA:RAB3IL1  | intronic NM_      | .   | .       |
| ACa04 | 11 | #### | .         | C | T | . | PA:MIR3680- | ncRNA_NR_         | .   | .       |
| ACa04 | 11 | #### | rs3704854 | C | T | . | PA:RCOR2    | exonic NM_        | miR | RCOR2   |
| ACa04 | 11 | #### | .         | C | G | . | PA:TRPT1    | intronic NM_      | .   | .       |
| ACa04 | 11 | #### | .         | C | G | . | PA:NUDT22   | exonic NM_        | miR | NUDT2   |
| ACa04 | 11 | #### | .         | G | T | . | PA:VEGFB    | intronic NM_      | .   | .       |
| ACa04 | 11 | #### | .         | G | A | . | PA:FKBP2    | exonic NM_        | miR | FKBP2:  |
| ACa04 | 11 | #### | .         | G | A | . | PA:FKBP2    | UTR3 NM_NM_       | .   | .       |



|       |    |      |           |   |   |   |             |            |           |     |          |
|-------|----|------|-----------|---|---|---|-------------|------------|-----------|-----|----------|
| ACa04 | 11 | #### | .         | C | T | . | PA:CCDC88B  | intronic   | NM_.      | .   | .        |
| ACa04 | 11 | #### | rs7459229 | C | T | . | PA:LTBP3    | intronic   | NM_.      | .   | .        |
| ACa04 | 11 | #### | .         | C | G | . | PA:P4HA3    | exonic     | NM_.      | mis | P4HA3:   |
| ACa04 | 11 | #### | .         | G | A | . | PA:NCAM1    | intronic   | NM_.      | .   | .        |
| ACa04 | 11 | #### | rs3521580 | T | C | . | PA:PCSK7    | intronic   | NM_.      | .   | .        |
| ACa04 | 11 | #### | rs3580670 | C | T | . | PA:PCSK7    | intronic   | NM_.      | .   | .        |
| ACa04 | 11 | #### | rs9203240 | C | T | . | PA:HEPACAM  | UTR3       | NM_NM_.   | .   | .        |
| ACa04 | 11 | #### | .         | C | T | . | PA:ZBTB44   | exonic     | NM_.      | mis | ZBTB44:  |
| ACa04 | 12 | #### | .         | C | G | . | PA:ENO2     | intronic   | NM_.      | .   | .        |
| ACa04 | 12 | #### | .         | C | T | . | PA:ENO2     | intronic   | NM_.      | .   | .        |
| ACa04 | 12 | #### | .         | C | T | . | PA:NECAP1   | UTR5       | NM_NM_.   | .   | .        |
| ACa04 | 12 | #### | rs7123030 | G | A | . | PA:DDX11    | exonic     | NM_.      | mis | DDX11:   |
| ACa04 | 12 | #### | .         | G | A | . | PA:KIAA1551 | exonic     | NM_.      | mis | KIAA15   |
| ACa04 | 12 | #### | .         | G | C | . | PA:PDZRN4   | intronic   | NM_.      | .   | .        |
| ACa04 | 12 | #### | .         | C | G | . | PA:SCAF11   | exonic     | NM_.      | mis | SCAF11:  |
| ACa04 | 12 | #### | .         | C | T | . | PA:CYP27B1  | exonic     | NM_.      | mis | CYP27B1: |
| ACa04 | 12 | #### | .         | C | G | . | PA:CYP27B1  | intronic   | NM_.      | .   | .        |
| ACa04 | 12 | #### | rs8674713 | G | A | . | PA:PPM1H    | intronic   | NM_.      | .   | .        |
| ACa04 | 12 | #### | rs9109827 | C | T | . | PA:MDM1     | intronic   | NM_.      | .   | .        |
| ACa04 | 12 | #### | rs9642294 | C | T | . | PA:PTPRQ    | intronic   | NM_.      | .   | .        |
| ACa04 | 12 | #### | .         | T | G | . | PA:C12orf29 | intronic   | NM_.      | .   | .        |
| ACa04 | 12 | #### | .         | C | A | . | PA:CRADD    | intronic   | NM_.      | .   | .        |
| ACa04 | 12 | #### | .         | G | C | . | PA:MYBPC1   | exonic     | NM_.      | mis | MYBPC    |
| ACa04 | 12 | #### | .         | C | T | . | PA:RBM19    | intronic   | NM_.      | .   | .        |
| ACa04 | 12 | #### | .         | C | T | . | PA:MED13L   | exonic     | NM_.      | syr | MED13    |
| ACa04 | 12 | #### | .         | G | A | . | PA:GCN1L1   | intronic   | NM_.      | .   | .        |
| ACa04 | 12 | #### | rs7540482 | G | A | . | PA:PLA2G1B  | intronic   | NM_.      | .   | .        |
| ACa04 | 12 | #### | .         | G | A | . | PA:SBNO1    | intronic   | NM_.      | .   | .        |
| ACa04 | 12 | #### | .         | C | G | . | PA:EP400    | intronic   | NM_.      | .   | .        |
| ACa04 | 13 | #### | .         | A | C | . | PA:IFT88    | intronic   | NM_.      | .   | .        |
| ACa04 | 13 | #### | .         | G | C | . | PA:NBEA     | exonic     | NM_.      | mis | NBEA:1   |
| ACa04 | 13 | #### | .         | G | C | . | PA:EPSTI1   | exonic     | NM_.      | sto | EPSTI1   |
| ACa04 | 13 | #### | .         | C | A | . | PA:DOCK9    | intronic   | NM_.      | .   | .        |
| ACa04 | 13 | #### | rs7720033 | G | T | . | PA:FGF14    | exonic     | NM_.      | syr | FGF14:   |
| ACa04 | 14 | #### | rs1450473 | C | T | . | PA:.        | intergen   | NR_dist=. | .   | .        |
| ACa04 | 14 | #### | .         | A | C | . | PA:.        | intergen   | NM_dist=. | .   | .        |
| ACa04 | 14 | #### | .         | G | A | . | PA:DHRS4-A: | ncRNA_NR_. | .         | .   | .        |
| ACa04 | 14 | #### | .         | G | A | . | PA:DHRS4-A: | ncRNA_NR_. | .         | .   | .        |
| ACa04 | 14 | #### | .         | C | T | . | PA:.        | intergen   | NM_dist=. | .   | .        |
| ACa04 | 14 | #### | .         | G | C | . | PA:.        | intergen   | NR_dist=. | .   | .        |
| ACa04 | 14 | #### | rs1501582 | C | T | . | PA:GCH1     | exonic     | NM_.      | syr | GCH1:1   |
| ACa04 | 14 | #### | .         | C | A | . | PA:LRRRC9   | ncRNA_NR_. | .         | .   | .        |
| ACa04 | 14 | #### | .         | C | A | . | PA:MAX,CHU  | intronic   | NM_.      | .   | .        |
| ACa04 | 14 | #### | .         | C | A | . | PA:MAX,CHU  | intronic   | NM_.      | .   | .        |
| ACa04 | 14 | #### | rs7676169 | G | A | . | PA:SMOC1    | exonic     | NM_.      | mis | SMOC1    |
| ACa04 | 14 | #### | .         | C | T | . | PA:PAPLN    | exonic     | NM_.      | syr | PAPLN:   |
| ACa04 | 14 | #### | .         | G | A | . | PA:ANGEL1   | intronic   | NM_.      | .   | .        |
| ACa04 | 14 | #### | .         | G | C | . | PA:.        | intergen   | NM_dist=. | .   | .        |
| ACa04 | 14 | #### | .         | G | A | . | PA:LGMMN    | intronic   | NM_.      | .   | .        |
| ACa04 | 14 | #### | rs3756754 | G | A | . | PA:SERPINA: | ncRNA_NR_. | .         | .   | .        |
| ACa04 | 14 | #### | .         | T | G | . | PA:MTA1     | intronic   | NM_.      | .   | .        |
| ACa04 | 14 | #### | rs5537870 | G | A | . | PA:.        | intergen   | NR_dist=. | .   | .        |
| ACa04 | 14 | #### | rs1289410 | G | A | . | PA:.        | intergen   | NR_dist=. | .   | .        |
| ACa04 | 15 | #### | .         | C | T | . | PA:.        | intergen   | NR_dist=. | .   | .        |

|       |    |      |           |   |   |   |             |           |          |            |
|-------|----|------|-----------|---|---|---|-------------|-----------|----------|------------|
| ACa04 | 15 | #### | .         | C | A | . | PA:LOC28368 | ncRNA_NR_ | .        | .          |
| ACa04 | 15 | #### | rs5409237 | C | T | . | PA:HERC2    | exonic    | NM_      | syr HERC2  |
| ACa04 | 15 | #### | .         | T | G | . | PA:.        | intergen  | NR_dist= | .          |
| ACa04 | 15 | #### | .         | T | G | . | PA:PDCD6IP1 | ncRNA_NR_ | .        | .          |
| ACa04 | 15 | #### | .         | T | C | . | PA:ULK4P1,U | ncRNA_NR_ | .        | .          |
| ACa04 | 15 | #### | rs2015085 | C | A | . | PA:.        | intergen  | NR_dist= | .          |
| ACa04 | 15 | #### | rs7481072 | C | T | . | PA:RPAP1    | intronic  | NM_      | .          |
| ACa04 | 15 | #### | .         | C | T | . | PA:RPAP1    | intronic  | NM_      | .          |
| ACa04 | 15 | #### | .         | C | G | . | PA:RPAP1    | exonic    | NM_      | mis RPAP1: |
| ACa04 | 15 | #### | rs7754448 | G | A | . | PA:SPTBN5   | exonic    | NM_      | syr SPTBN  |
| ACa04 | 15 | #### | .         | G | T | . | PA:CATSPER  | intronic  | NM_      | .          |
| ACa04 | 15 | #### | rs1922871 | C | T | . | PA:MFAP1    | intronic  | NM_      | .          |
| ACa04 | 15 | #### | .         | C | T | . | PA:EIF3J    | intronic  | NM_      | .          |
| ACa04 | 15 | #### | rs6202600 | G | A | . | PA:.        | intergen  | NM_dist= | .          |
| ACa04 | 15 | #### | .         | G | A | . | PA:SPATA5L  | exonic    | NM_      | syr SPATA: |
| ACa04 | 15 | #### | .         | G | A | . | PA:RFX7     | intronic  | NM_      | .          |
| ACa04 | 15 | #### | .         | C | T | . | PA:ANXA2    | intronic  | NM_      | .          |
| ACa04 | 15 | #### | rs5478938 | C | T | . | PA:RBPMS2   | intronic  | NM_      | .          |
| ACa04 | 15 | #### | .         | C | A | . | PA:MAP2K1   | intronic  | NM_      | .          |
| ACa04 | 15 | #### | .         | G | C | . | PA:MAP2K5   | intronic  | NM_      | .          |
| ACa04 | 15 | #### | .         | G | A | . | PA:ISLR     | UTR3      | NM_NM_   | .          |
| ACa04 | 15 | #### | .         | C | T | . | PA:.        | intergen  | NM_dist= | .          |
| ACa04 | 15 | #### | .         | C | T | . | PA:CHRNA4   | exonic    | NM_      | mis CHRNB  |
| ACa04 | 15 | #### | .         | C | G | . | PA:ANKRD34  | exonic    | NM_      | mis ANKRD  |
| ACa04 | 15 | #### | rs2401418 | T | C | . | PA:.        | intergen  | NM_dist= | .          |
| ACa04 | 15 | #### | .         | C | T | . | PA:FANCI    | splicing  | NM_NM_   | .          |
| ACa04 | 15 | #### | .         | C | G | . | PA:VPS33B   | exonic    | NM_      | mis VPS33B |
| ACa04 | 15 | #### | .         | C | G | . | PA:MCTP2    | intronic  | NM_      | .          |
| ACa04 | 15 | #### | .         | C | T | . | PA:MEF2A    | intronic  | NM_      | .          |
| ACa04 | 15 | #### | rs7510253 | C | T | . | PA:TARSL2   | exonic    | NM_      | mis TARSL: |
| ACa04 | 16 | #### | rs7504825 | G | A | . | PA:NPRL3    | exonic    | NM_      | unl UNKNC  |
| ACa04 | 16 | #### | .         | C | T | . | PA:CLCN7    | intronic  | NM_      | .          |
| ACa04 | 16 | #### | .         | G | A | . | PA:RBFOX1   | intronic  | NM_      | .          |
| ACa04 | 16 | #### | .         | G | A | . | PA:TEKT5    | exonic    | NM_      | sto TEKT5: |
| ACa04 | 16 | #### | .         | C | T | . | PA:TNFRSF1  | exonic    | NM_      | mis TNFRS  |
| ACa04 | 16 | #### | .         | G | A | . | PA:NOMO1    | intronic  | NM_      | .          |
| ACa04 | 16 | #### | rs5522924 | C | T | . | PA:NPIPA5   | intronic  | NM_      | .          |
| ACa04 | 16 | #### | rs6203288 | T | C | . | PA:.        | intergen  | NR_dist= | .          |
| ACa04 | 16 | #### | rs7654396 | C | T | . | PA:SMG1     | exonic    | NM_      | mis SMG1:f |
| ACa04 | 16 | #### | .         | G | A | . | PA:EEF2K    | intronic  | NM_      | .          |
| ACa04 | 16 | #### | .         | C | T | . | PA:POLR3E   | intronic  | NM_      | .          |
| ACa04 | 16 | #### | .         | A | G | . | PA:SMG1P1   | ncRNA_NR_ | .        | .          |
| ACa04 | 16 | #### | .         | C | G | . | PA:XPO6     | exonic    | NM_      | mis XPO6:M |
| ACa04 | 16 | #### | .         | G | A | . | PA:XPO6     | intronic  | NM_      | .          |
| ACa04 | 16 | #### | .         | G | A | . | PA:.        | intergen  | NR_dist= | .          |
| ACa04 | 16 | #### | .         | T | A | . | PA:RNF40    | intronic  | NM_      | .          |
| ACa04 | 16 | #### | .         | C | T | . | PA:ITGAM    | intronic  | NM_      | .          |
| ACa04 | 16 | #### | rs7896651 | A | C | . | PA:.        | intergen  | NR_dist= | .          |
| ACa04 | 16 | #### | rs7515102 | C | G | . | PA:LONP2    | splicing  | NM_NM_   | .          |
| ACa04 | 16 | #### | .         | C | T | . | PA:CNOT1    | exonic    | NM_      | mis CNOT1  |
| ACa04 | 16 | #### | .         | C | G | . | PA:CTCF     | exonic    | NM_      | mis CTCF:M |
| ACa04 | 16 | #### | .         | T | A | . | PA:ZNF821   | UTR5      | NM_NM_   | .          |
| ACa04 | 16 | #### | rs2911030 | A | G | . | PA:LOC28392 | ncRNA_NR_ | .        | .          |
| ACa04 | 16 | #### | .         | G | A | . | PA:.        | intergen  | NM_dist= | .          |

|       |    |      |           |   |   |   |                         |           |          |     |          |
|-------|----|------|-----------|---|---|---|-------------------------|-----------|----------|-----|----------|
| ACa04 | 16 | #### | .         | C | T | . | PA:.                    | ncRNA_NR_ | .        | .   |          |
| ACa04 | 17 | #### | rs7805194 | C | T | . | PA:P2RX1                | intronic  | NM_      | .   | .        |
| ACa04 | 17 | #### | .         | C | T | . | PA:ALOX12- <del>A</del> | ncRNA_NR_ | .        | .   |          |
| ACa04 | 17 | #### | .         | C | G | . | PA:TNFSF12              | exonic    | NM_      | mis | TNFSF12  |
| ACa04 | 17 | #### | .         | C | T | . | PA:DNAH2                | exonic    | NM_      | syr | DNAH2    |
| ACa04 | 17 | #### | .         | A | G | . | PA:MYH13                | exonic    | NM_      | mis | MYH13    |
| ACa04 | 17 | #### | .         | G | C | . | PA:DNAH9                | exonic    | NM_      | mis | DNAH9    |
| ACa04 | 17 | #### | rs5595610 | G | A | . | PA:TTC19                | intronic  | NM_      | .   | .        |
| ACa04 | 17 | #### | .         | C | G | . | PA:SREBF1               | UTR3      | NM_NM_   | .   | .        |
| ACa04 | 17 | #### | .         | G | C | . | PA:ZNF286B              | intronic  | NM_      | .   | .        |
| ACa04 | 17 | #### | .         | C | T | . | PA:CCDC144              | ncRNA_NR_ | .        | .   |          |
| ACa04 | 17 | #### | .         | G | A | . | PA:LGALS9B              | intronic  | NM_      | .   | .        |
| ACa04 | 17 | #### | rs7841783 | G | A | . | PA:FLJ36000             | ncRNA_NR_ | .        | .   |          |
| ACa04 | 17 | #### | .         | C | T | . | PA:TLCD1                | UTR3      | NM_NM_   | .   | .        |
| ACa04 | 17 | #### | .         | G | C | . | PA:ERAL1                | intronic  | NM_      | .   | .        |
| ACa04 | 17 | #### | .         | G | A | . | PA:.                    | upstream  | NR_      | .   | .        |
| ACa04 | 17 | #### | .         | C | G | . | PA:SUZ12                | exonic    | NM_      | mis | SUZ12:   |
| ACa04 | 17 | #### | .         | C | A | . | PA:SUZ12                | intronic  | NM_      | .   | .        |
| ACa04 | 17 | #### | .         | G | C | . | PA:RHOT1                | intronic  | NM_      | .   | .        |
| ACa04 | 17 | #### | .         | G | T | . | PA:LOC101006            | intronic  | NM_      | .   | .        |
| ACa04 | 17 | #### | rs8795183 | C | T | . | PA:TBC1D3H              | intronic  | NM_      | .   | .        |
| ACa04 | 17 | #### | .         | G | A | . | PA:MRM1                 | intronic  | NM_      | .   | .        |
| ACa04 | 17 | #### | .         | G | C | . | PA:ACACA                | intronic  | NM_      | .   | .        |
| ACa04 | 17 | #### | .         | G | A | . | PA:SYNRG                | intronic  | NM_      | .   | .        |
| ACa04 | 17 | #### | .         | C | A | . | PA:.                    | upstream  | NM_      | .   | .        |
| ACa04 | 17 | #### | .         | G | C | . | PA:MED1                 | exonic    | NM_      | mis | MED1:1   |
| ACa04 | 17 | #### | rs1035039 | C | T | . | PA:LOC100506            | ncRNA_NR_ | .        | .   |          |
| ACa04 | 17 | #### | .         | G | A | . | PA:ZNF385C              | intronic  | NM_      | .   | .        |
| ACa04 | 17 | #### | .         | C | T | . | PA:SLC4A1               | intronic  | NM_      | .   | .        |
| ACa04 | 17 | #### | .         | C | T | . | PA:EME1                 | intronic  | NM_      | .   | .        |
| ACa04 | 17 | #### | .         | C | T | . | PA:CACNA1C              | intronic  | NM_      | .   | .        |
| ACa04 | 17 | #### | .         | C | G | . | PA:BZRAP1               | splicing  | NM_NM_   | .   | .        |
| ACa04 | 17 | #### | .         | G | C | . | PA:DDX42                | exonic    | NM_      | mis | DDX42:   |
| ACa04 | 17 | #### | .         | G | T | . | PA:DDX42                | exonic    | NM_      | mis | DDX42:   |
| ACa04 | 17 | #### | .         | T | G | . | PA:CEP112               | intronic  | NM_      | .   | .        |
| ACa04 | 17 | #### | .         | G | C | . | PA:UNC13D               | intronic  | NM_      | .   | .        |
| ACa04 | 17 | #### | rs1405528 | C | T | . | PA:SLC26A11             | exonic    | NM_      | syr | SLC26A11 |
| ACa04 | 17 | #### | .         | C | T | . | PA:BAIAP2               | exonic    | NM_      | syr | BAIAP2   |
| ACa04 | 17 | #### | rs3677917 | A | G | . | PA:FLJ43681             | ncRNA_NR_ | .        | .   |          |
| ACa04 | 18 | #### | .         | G | C | . | PA:L3MBTL4              | intronic  | NM_      | .   | .        |
| ACa04 | 18 | #### | .         | G | A | . | PA:LRRRC30              | exonic    | NM_      | syr | LRRRC30  |
| ACa04 | 18 | #### | .         | C | G | . | PA:PPP4R1               | exonic    | NM_      | mis | PPP4R1   |
| ACa04 | 18 | #### | .         | G | C | . | PA:TXNDC2               | UTR5      | NM_NM_   | .   | .        |
| ACa04 | 18 | #### | .         | C | G | . | PA:PIEZO2               | exonic    | NM_      | mis | PIEZO2   |
| ACa04 | 18 | #### | .         | G | A | . | PA:RNMT                 | exonic    | NM_      | mis | RNMT:1   |
| ACa04 | 18 | #### | .         | C | T | . | PA:ANKRD20              | ncRNA_NR_ | .        | .   |          |
| ACa04 | 18 | #### | .         | G | T | . | PA:KCTD1                | intronic  | NM_      | .   | .        |
| ACa04 | 18 | #### | .         | C | T | . | PA:SKOR2                | exonic    | NM_      | mis | SKOR2    |
| ACa04 | 18 | #### | .         | G | A | . | PA:TCF4                 | intronic  | NM_      | .   | .        |
| ACa04 | 18 | #### | .         | C | T | . | PA:.                    | intergen  | NR_dist= | .   | .        |
| ACa04 | 18 | #### | rs7468202 | C | T | . | PA:TNFRSF1              | intronic  | NM_      | .   | .        |
| ACa04 | 18 | #### | .         | G | A | . | PA:CCDC102              | exonic    | NM_      | syr | CCDC102  |
| ACa04 | 18 | #### | .         | A | G | . | PA:ATP9B                | intronic  | NM_      | .   | .        |
| ACa04 | 19 | #### | rs9545783 | C | T | . | PA:.                    | upstream  | NM_      | .   | .        |

|       |    |      |           |   |   |   |             |            |           |     |         |
|-------|----|------|-----------|---|---|---|-------------|------------|-----------|-----|---------|
| ACa04 | 19 | #### | .         | G | A | . | PA:HMHA1    | intronic   | NM_.      | .   | .       |
| ACa04 | 19 | #### | .         | G | C | . | PA:HMHA1    | intronic   | NM_.      | .   | .       |
| ACa04 | 19 | #### | .         | G | T | . | PA:TCF3     | intronic   | NM_.      | .   | .       |
| ACa04 | 19 | #### | rs3742787 | G | A | . | PA:TCF3     | intronic   | NM_.      | .   | .       |
| ACa04 | 19 | #### | rs1418930 | A | T | . | PA:SCAMP4   | intronic   | NM_.      | .   | .       |
| ACa04 | 19 | #### | .         | G | T | . | PA:THOP1    | exonic     | NM_.      | sto | THOP1   |
| ACa04 | 19 | #### | rs7627736 | G | A | . | PA:THOP1    | intronic   | NM_.      | .   | .       |
| ACa04 | 19 | #### | .         | C | T | . | PA:NFIC     | UTR5       | NM_NM_.   | .   | .       |
| ACa04 | 19 | #### | .         | G | C | . | PA:CHAF1A   | intronic   | NM_.      | .   | .       |
| ACa04 | 19 | #### | .         | G | A | . | PA:ACSBG2   | intronic   | NM_.      | .   | .       |
| ACa04 | 19 | #### | .         | T | A | . | PA:STXBP2   | intronic   | NM_.      | .   | .       |
| ACa04 | 19 | #### | .         | A | G | . | PA:ANGPTL4  | intronic   | NM_.      | .   | .       |
| ACa04 | 19 | #### | .         | G | C | . | PA:RAB11B-1 | ncRNA_NR_. | .         | .   | .       |
| ACa04 | 19 | #### | .         | C | G | . | PA:MYO1F    | intronic   | NM_.      | .   | .       |
| ACa04 | 19 | #### | .         | G | T | . | PA:MUC16    | exonic     | NM_.      | sto | MUC16   |
| ACa04 | 19 | #### | .         | G | A | . | PA:MUC16    | exonic     | NM_.      | mis | MUC16   |
| ACa04 | 19 | #### | .         | G | A | . | PA:MUC16    | exonic     | NM_.      | syr | MUC16   |
| ACa04 | 19 | #### | rs7741875 | G | A | . | PA:MUC16    | exonic     | NM_.      | mis | MUC16   |
| ACa04 | 19 | #### | .         | C | T | . | PA:QTRT1    | intronic   | NM_.      | .   | .       |
| ACa04 | 19 | #### | .         | G | C | . | PA:ZNF442   | exonic     | NM_.      | mis | ZNF442  |
| ACa04 | 19 | #### | .         | G | A | . | PA:HOOK2    | intronic   | NM_.      | .   | .       |
| ACa04 | 19 | #### | .         | G | T | . | PA:JUNB     | UTR5       | NM_NM_.   | .   | .       |
| ACa04 | 19 | #### | .         | C | G | . | PA:NWD1     | exonic     | NM_.      | mis | NWD1:1  |
| ACa04 | 19 | #### | rs7797020 | G | A | . | PA:FAM129C  | exonic     | NM_.      | mis | FAM129C |
| ACa04 | 19 | #### | .         | G | A | . | PA:SLC5A5   | intronic   | NM_.      | .   | .       |
| ACa04 | 19 | #### | .         | A | T | . | PA:YJEFN3   | intronic   | NM_.      | .   | .       |
| ACa04 | 19 | #### | .         | C | T | . | PA:ZNF253   | exonic     | NM_.      | mis | ZNF253  |
| ACa04 | 19 | #### | .         | G | A | . | PA:ZNF676   | UTR5       | NM_NM_.   | .   | .       |
| ACa04 | 19 | #### | .         | C | G | . | PA:PLEKHF1  | intronic   | NM_.      | .   | .       |
| ACa04 | 19 | #### | .         | G | A | . | PA:.        | intergen   | NM_dist=. | .   | .       |
| ACa04 | 19 | #### | .         | G | C | . | PA:HAUS5    | intronic   | NM_.      | .   | .       |
| ACa04 | 19 | #### | rs8683521 | T | G | . | PA:.        | intergen   | NM_dist=. | .   | .       |
| ACa04 | 19 | #### | rs8793125 | T | C | . | PA:.        | intergen   | NM_dist=. | .   | .       |
| ACa04 | 19 | #### | rs7653982 | C | T | . | PA:ZNF850   | exonic     | NM_.      | mis | ZNF850  |
| ACa04 | 19 | #### | rs9896621 | C | T | . | PA:SAMD4B   | intronic   | NM_.      | .   | .       |
| ACa04 | 19 | #### | .         | G | A | . | PA:FCGBP    | intronic   | NM_.      | .   | .       |
| ACa04 | 19 | #### | rs1408143 | C | T | . | PA:ARHGEF1  | intronic   | NM_.      | .   | .       |
| ACa04 | 19 | #### | .         | G | C | . | PA:GRIK5    | intronic   | NM_.      | .   | .       |
| ACa04 | 19 | #### | rs1444115 | C | T | . | PA:GRIK5    | intronic   | NM_.      | .   | .       |
| ACa04 | 19 | #### | .         | G | A | . | PA:PSG10P   | ncRNA_NR_. | .         | .   | .       |
| ACa04 | 19 | #### | .         | G | C | . | PA:PLAUR    | intronic   | NM_.      | .   | .       |
| ACa04 | 19 | #### | rs4251912 | G | A | . | PA:PLAUR    | exonic     | NM_.      | syr | PLAUR   |
| ACa04 | 19 | #### | .         | C | G | . | PA:NANOS2   | exonic     | NM_.      | mis | NANOS   |
| ACa04 | 19 | #### | .         | G | T | . | PA:NPAS1    | intronic   | NM_.      | .   | .       |
| ACa04 | 19 | #### | .         | C | A | . | PA:SCAF1    | intronic   | NM_.      | .   | .       |
| ACa04 | 19 | #### | .         | G | A | . | PA:ZNF615   | exonic     | NM_.      | syr | ZNF615  |
| ACa04 | 19 | #### | .         | T | G | . | PA:.        | downstr    | NM_.      | .   | .       |
| ACa04 | 19 | #### | .         | G | A | . | PA:.        | upstream   | NM_.      | .   | .       |
| ACa04 | 19 | #### | .         | G | C | . | PA:NCR1     | exonic     | NM_.      | mis | NCR1:1  |
| ACa04 | 19 | #### | .         | G | C | . | PA:USP29    | exonic     | NM_.      | mis | USP29:  |
| ACa04 | 19 | #### | .         | G | C | . | PA:USP29    | exonic     | NM_.      | mis | USP29:  |
| ACa04 | 20 | #### | .         | C | T | . | PA:SIRPB1   | intronic   | NM_.      | .   | .       |
| ACa04 | 20 | #### | .         | T | G | . | PA:TGM6     | intronic   | NM_.      | .   | .       |
| ACa04 | 20 | #### | .         | G | A | . | PA:TMC2     | intronic   | NM_.      | .   | .       |

|       |    |      |           |   |   |   |             |           |           |     |         |
|-------|----|------|-----------|---|---|---|-------------|-----------|-----------|-----|---------|
| ACa04 | 20 | #### | .         | G | A | . | PA:SIGLEC1  | exonic    | NM_       | mi  | SIGLEC  |
| ACa04 | 20 | #### | rs7610831 | C | G | . | PA:PLCB1    | exonic    | NM_       | mi  | PLCB1:  |
| ACa04 | 20 | #### | .         | C | G | . | PA:BANF2    | intronic  | NM_       | .   | .       |
| ACa04 | 20 | #### | .         | G | A | . | PA:SNORD17  | ncRNA_NR_ | .         | .   | .       |
| ACa04 | 20 | #### | rs8120738 | C | G | . | PA:FRG1B    | ncRNA_NR_ | .         | .   | .       |
| ACa04 | 20 | #### | rs7791580 | G | A | . | PA:FRG1B    | ncRNA_NR_ | .         | .   | .       |
| ACa04 | 20 | #### | .         | C | T | . | PA:HCK      | UTR5      | NM_NM_    | .   | .       |
| ACa04 | 20 | #### | .         | C | G | . | PA:NCOA6    | intronic  | NM_       | .   | .       |
| ACa04 | 20 | #### | rs1904867 | C | T | . | PA:NCOA6    | exonic    | NM_       | mi  | NCOA6   |
| ACa04 | 20 | #### | .         | C | T | . | PA:RNF114   | exonic    | NM_       | sto | RNF114  |
| ACa04 | 20 | #### | .         | C | T | . | PA:DOK5     | exonic    | NM_       | unl | UNKNC   |
| ACa04 | 20 | #### | .         | C | T | . | PA:ZNF831   | exonic    | NM_       | syr | ZNF831  |
| ACa04 | 20 | #### | .         | G | T | . | PA:OSBPL2   | intronic  | NM_       | .   | .       |
| ACa04 | 20 | #### | .         | G | A | . | PA:COL20A1  | intronic  | NM_       | .   | .       |
| ACa04 | 20 | #### | rs1874434 | G | A | . | PA:MYT1     | intronic  | NM_       | .   | .       |
| ACa04 | 21 | #### | .         | C | T | . | PA:.        | intergen  | NR_dist=  | .   | .       |
| ACa04 | 21 | #### | .         | A | C | . | PA:.        | intergen  | NR_dist=  | .   | .       |
| ACa04 | 21 | #### | .         | T | G | . | PA:.        | intergen  | NR_dist=  | .   | .       |
| ACa04 | 21 | #### | rs3707796 | G | A | . | PA:.        | intergen  | NR_dist=  | .   | .       |
| ACa04 | 21 | #### | rs7469658 | C | T | . | PA:BAGE2,B/ | intronic  | NM_       | .   | .       |
| ACa04 | 21 | #### | rs4638882 | C | A | . | PA:.        | intergen  | NM_dist=  | .   | .       |
| ACa04 | 21 | #### | .         | T | C | . | PA:CBR3-AS' | ncRNA_NR_ | .         | .   | .       |
| ACa04 | 21 | #### | .         | G | A | . | PA:.        | intergen  | NM_dist=  | .   | .       |
| ACa04 | 21 | #### | .         | G | A | . | PA:UBASH3A  | intronic  | NM_       | .   | .       |
| ACa04 | 21 | #### | .         | G | C | . | PA:CBS      | exonic    | NM_       | mi  | CBS:NM  |
| ACa04 | 21 | #### | rs7276130 | G | A | . | PA:FAM207A  | intronic  | NM_       | .   | .       |
| ACa04 | 21 | #### | .         | C | G | . | PA:COL18A1  | intronic  | NM_       | .   | .       |
| ACa04 | 22 | #### | .         | C | T | . | PA:.        | intergen  | NOI dist= | .   | .       |
| ACa04 | 22 | #### | .         | T | A | . | PA:.        | intergen  | NM_dist=  | .   | .       |
| ACa04 | 22 | #### | .         | G | C | . | PA:.        | intergen  | NM_dist=  | .   | .       |
| ACa04 | 22 | #### | rs3769174 | G | T | . | PA:GGT3P    | ncRNA_NR_ | .         | .   | .       |
| ACa04 | 22 | #### | rs2870983 | C | T | . | PA:PRODH    | exonic    | NM_       | mi  | PRODH   |
| ACa04 | 22 | #### | .         | G | A | . | PA:.        | intergen  | NM_dist=  | .   | .       |
| ACa04 | 22 | #### | rs1389774 | C | G | . | PA:.        | intergen  | NR_dist=  | .   | .       |
| ACa04 | 22 | #### | rs3731564 | G | C | . | PA:POM121L  | ncRNA_NR_ | .         | .   | .       |
| ACa04 | 22 | #### | rs1856371 | C | T | . | PA:.        | intergen  | NM_dist=  | .   | .       |
| ACa04 | 22 | #### | .         | C | G | . | PA:KIAA1656 | ncRNA_NR_ | .         | .   | .       |
| ACa04 | 22 | #### | rs5669283 | G | A | . | PA:PES1     | intronic  | NM_       | .   | .       |
| ACa04 | 22 | #### | .         | G | T | . | PA:TOM1     | intronic  | NM_       | .   | .       |
| ACa04 | 22 | #### | rs7606577 | G | A | . | PA:MFNG     | intronic  | NM_       | .   | .       |
| ACa04 | 22 | #### | .         | G | C | . | PA:APOBEC3  | ncRNA_NR_ | .         | .   | .       |
| ACa04 | 22 | #### | .         | G | C | . | PA:SYNGR1   | exonic    | NM_       | mi  | SYNGR   |
| ACa04 | 22 | #### | rs1409901 | C | T | . | PA:XPNPEP3  | exonic    | NM_       | mi  | XPNPE   |
| ACa04 | 22 | #### | .         | G | C | . | PA:EP300    | exonic    | NM_       | mi  | EP300:l |
| ACa04 | 22 | #### | rs3731131 | G | A | . | PA:SREBF2   | exonic    | NM_       | syr | SREBF   |
| ACa04 | 22 | #### | .         | C | G | . | PA:SMC1B    | intronic  | NM_       | .   | .       |
| ACa04 | 22 | #### | .         | C | T | . | PA:.        | intergen  | NR_dist=  | .   | .       |
| ACa04 | 22 | #### | .         | G | A | . | PA:MOV10L1  | intronic  | NM_       | .   | .       |
| ACa04 | 22 | #### | rs7711497 | G | A | . | PA:PLXNB2   | exonic    | NM_       | syr | PLXNB:  |
| ACa04 | X  | #### | .         | C | T | . | PA:P2RY8    | UTR3      | NM_NM_    | .   | .       |
| ACa04 | X  | #### | rs8673094 | G | A | . | PA:.        | intergen  | NM_dist=  | .   | .       |
| ACa04 | X  | #### | rs7643909 | T | C | . | PA:VCX3B    | UTR5      | NM_NM_    | .   | .       |
| ACa04 | X  | #### | rs6640384 | G | A | . | PA:.        | intergen  | NM_dist=  | .   | .       |
| ACa04 | X  | #### | .         | C | G | . | PA:TLR7     | exonic    | NM_       | mi  | TLR7:N  |

|       |   |      |           |   |   |   |             |            |            |            |
|-------|---|------|-----------|---|---|---|-------------|------------|------------|------------|
| ACa04 | X | #### | .         | C | A | . | PA:TLR8     | exonic     | NM_.       | sto TLR8:N |
| ACa04 | X | #### | .         | G | T | . | PA:DMD      | intronic   | NM_.       | .          |
| ACa04 | X | #### | .         | G | A | . | PA:MAOA     | exonic     | NM_.       | mis MAOA:I |
| ACa04 | X | #### | .         | G | A | . | PA:SSX1     | intronic   | NM_.       | .          |
| ACa04 | X | #### | .         | G | A | . | PA:PCSK1N   | exonic     | NM_.       | syr PCSK1I |
| ACa04 | X | #### | .         | C | G | . | PA:USP27X-1 | ncRNA_NR_. | .          | .          |
| ACa04 | X | #### | .         | G | A | . | PA:FAM120C  | UTR3       | NM_NM_.    | .          |
| ACa04 | X | #### | .         | A | G | . | PA:FAM120C  | intronic   | NM_.       | .          |
| ACa04 | X | #### | .         | G | A | . | PA:GNL3L    | exonic     | NM_.       | syr GNL3L: |
| ACa04 | X | #### | .         | C | T | . | PA:UQCRBP1  | ncRNA_NR_. | .          | .          |
| ACa04 | X | #### | .         | T | C | . | PA:TEX11    | intronic   | NM_.       | .          |
| ACa04 | X | #### | .         | C | G | . | PA:MED12    | exonic     | NM_.       | sto MED12  |
| ACa04 | X | #### | .         | G | A | . | PA:NLGN3    | exonic     | NM_.       | sto NLGN3  |
| ACa04 | X | #### | .         | C | G | . | PA:BCYRN1   | ncRNA_NR_. | .          | .          |
| ACa04 | X | #### | .         | G | A | . | PA:.        | intergen   | NM_dist=.  | .          |
| ACa04 | X | #### | .         | C | T | . | PA:SASH3    | exonic     | NM_.       | sto SASH3: |
| ACa04 | X | #### | .         | G | C | . | PA:UTP14A   | exonic     | NM_.       | mis UTP14/ |
| ACa04 | X | #### | .         | G | A | . | PA:BCORL1   | exonic     | NM_.       | mis BCORL  |
| ACa04 | X | #### | .         | G | A | . | PA:FIRRE    | ncRNA_NR_. | .          | .          |
| ACa04 | X | #### | .         | C | T | . | PA:ARHGEF6  | exonic     | NM_.       | mis ARHGE  |
| ACa04 | X | #### | .         | G | A | . | PA:HMGB3    | exonic     | NM_.       | unl UNKNC  |
| ACa04 | X | #### | rs7824625 | G | A | . | PA:TREX2    | exonic     | NM_.       | mis TREX2: |
| ACa04 | X | #### | .         | A | C | . | PA:BCAP31   | intronic   | NM_.       | .          |
| ACa06 | 1 | #### | .         | T | C | . | PA:.        | intergen   | NR_dist=.  | .          |
| ACa06 | 1 | #### | rs7810569 | G | A | . | PA:.        | intergen   | NR_dist=.  | .          |
| ACa06 | 1 | #### | rs1149269 | C | T | . | PA:ATAD3A   | intronic   | NM_.       | .          |
| ACa06 | 1 | #### | .         | G | T | . | PA:FAM213B  | exonic     | NM_.       | syr FAM21: |
| ACa06 | 1 | #### | .         | G | A | . | PA:MEGF6    | intronic   | NM_.       | .          |
| ACa06 | 1 | #### | .         | A | C | . | PA:GPR157   | intronic   | NM_.       | .          |
| ACa06 | 1 | #### | rs2008876 | C | T | . | PA:.        | intergen   | NM_dist=.  | .          |
| ACa06 | 1 | #### | rs5565927 | T | C | . | PA:NBPF1    | intronic   | NM_.       | .          |
| ACa06 | 1 | #### | rs6177234 | C | A | . | PA:NBPF1    | intronic   | NM_.       | .          |
| ACa06 | 1 | #### | rs1008195 | C | G | . | PA:CROCCP2  | ncRNA_NR_. | .          | .          |
| ACa06 | 1 | #### | rs5388409 | G | A | . | PA:ESPNP    | ncRNA_NR_. | .          | .          |
| ACa06 | 1 | #### | rs6669627 | G | C | . | PA:CROCC    | exonic     | NM_.       | mis CROCC  |
| ACa06 | 1 | #### | .         | A | C | . | PA:PAX7     | intronic   | NM_.       | .          |
| ACa06 | 1 | #### | rs7661411 | C | T | . | PA:IFI6     | intronic   | NM_.       | .          |
| ACa06 | 1 | #### | rs7802118 | C | T | . | PA:HIVEP3   | exonic     | NM_.       | mis HIVEP3 |
| ACa06 | 1 | #### | rs8664767 | C | T | . | PA:.        | intergen   | NM_dist=.  | .          |
| ACa06 | 1 | #### | .         | G | C | . | PA:.        | intergen   | NM_dist=.  | .          |
| ACa06 | 1 | #### | rs7581372 | T | C | . | PA:.        | intergen   | NOI_dist=. | .          |
| ACa06 | 1 | #### | rs7697846 | A | C | . | PA:.        | intergen   | NOI_dist=. | .          |
| ACa06 | 1 | #### | rs2016919 | T | A | . | PA:.        | intergen   | NR_dist=.  | .          |
| ACa06 | 1 | #### | .         | C | A | . | PA:.        | intergen   | NR_dist=.  | .          |
| ACa06 | 1 | #### | rs3703375 | C | A | . | PA:.        | intergen   | NR_dist=.  | .          |
| ACa06 | 1 | #### | rs1996515 | T | A | . | PA:.        | intergen   | NR_dist=.  | .          |
| ACa06 | 1 | #### | .         | A | T | . | PA:.        | intergen   | NR_dist=.  | .          |
| ACa06 | 1 | #### | .         | C | G | . | PA:.        | intergen   | NR_dist=.  | .          |
| ACa06 | 1 | #### | .         | G | A | . | PA:LINC0113 | ncRNA_NR_. | .          | .          |
| ACa06 | 1 | #### | .         | T | A | . | PA:NBPF9,N  | intronic   | NM_.       | .          |
| ACa06 | 1 | #### | .         | G | T | . | PA:NBPF25P  | ncRNA_NR_. | .          | .          |
| ACa06 | 1 | #### | rs8799960 | G | C | . | PA:NBPF8    | intronic   | NM_.       | .          |
| ACa06 | 1 | #### | rs2003739 | G | A | . | PA:NBPF25P  | ncRNA_NR_. | .          | .          |
| ACa06 | 1 | #### | rs3705433 | G | A | . | PA:NBPF25P  | ncRNA_NR_. | .          | .          |

|       |   |      |           |   |   |   |             |           |           |     |        |
|-------|---|------|-----------|---|---|---|-------------|-----------|-----------|-----|--------|
| ACa06 | 1 | #### | .         | T | G | . | PA:FCRL4    | intronic  | NM_       | .   | .      |
| ACa06 | 1 | #### | rs1839036 | T | A | . | PA:.        | intergen  | NR_dist=  | .   | .      |
| ACa06 | 1 | #### | .         | T | C | . | PA:.        | intergen  | NM_dist=  | .   | .      |
| ACa06 | 1 | #### | .         | A | G | . | PA:.        | intergen  | NM_dist=  | .   | .      |
| ACa06 | 1 | #### | .         | A | C | . | PA:ENAH     | intronic  | NM_       | .   | .      |
| ACa06 | 1 | #### | rs1828179 | T | C | . | PA:.        | intergen  | NM_dist=  | .   | .      |
| ACa06 | 2 | #### | rs4096246 | A | C | . | PA:.        | intergen  | NR_dist=  | .   | .      |
| ACa06 | 2 | #### | .         | G | C | . | PA:RGPD1,R  | intronic  | NM_       | .   | .      |
| ACa06 | 2 | #### | .         | G | A | . | PA:.        | intergen  | NOI_dist= | .   | .      |
| ACa06 | 2 | #### | .         | G | T | . | PA:.        | intergen  | NR_dist=  | .   | .      |
| ACa06 | 2 | #### | rs2011280 | G | A | . | PA:ANAPC1   | exonic    | NM_       | mis | ANAPC  |
| ACa06 | 2 | #### | rs8685337 | G | A | . | PA:.        | upstream  | NR_       | .   | .      |
| ACa06 | 2 | #### | rs2747968 | A | G | . | PA:WASH2P   | ncRNA_NR_ | .         | .   | .      |
| ACa06 | 2 | #### | rs1029282 | G | T | . | PA:INSIG2   | intronic  | NM_       | .   | .      |
| ACa06 | 2 | #### | rs2001821 | A | G | . | PA:POTEE    | intronic  | NM_       | .   | .      |
| ACa06 | 2 | #### | rs7800646 | C | T | . | PA:.        | intergen  | NM_dist=  | .   | .      |
| ACa06 | 2 | #### | .         | T | C | . | PA:DHRS9    | intronic  | NM_       | .   | .      |
| ACa06 | 2 | #### | .         | A | T | . | PA:SLC25A12 | intronic  | NM_       | .   | .      |
| ACa06 | 2 | #### | rs1875561 | C | T | . | PA:UBE2E3   | intronic  | NM_       | .   | .      |
| ACa06 | 2 | #### | rs8671576 | C | G | . | PA:IKZF2    | intronic  | NM_       | .   | .      |
| ACa06 | 3 | #### | .         | T | G | . | PA:KLHL18   | intronic  | NM_       | .   | .      |
| ACa06 | 3 | #### | .         | G | A | . | PA:AGTR1    | exonic    | NM_       | sy  | AGTR1  |
| ACa06 | 3 | #### | .         | T | G | . | PA:CP       | intronic  | NM_       | .   | .      |
| ACa06 | 3 | #### | .         | T | G | . | PA:CP       | intronic  | NM_       | .   | .      |
| ACa06 | 3 | #### | rs3760511 | G | A | . | PA:.        | intergen  | NM_dist=  | .   | .      |
| ACa06 | 3 | #### | rs8677455 | A | G | . | PA:LINC0088 | ncRNA_NR_ | .         | .   | .      |
| ACa06 | 3 | #### | rs1128840 | A | G | . | PA:.        | intergen  | NR_dist=  | .   | .      |
| ACa06 | 4 | #### | .         | C | T | . | PA:ZNF595,Z | intronic  | NM_       | .   | .      |
| ACa06 | 4 | #### | rs1443656 | G | A | . | PA:SLIT2    | intronic  | NM_       | .   | .      |
| ACa06 | 5 | #### | .         | G | A | . | PA:FAM134B  | intronic  | NM_       | .   | .      |
| ACa06 | 5 | #### | .         | C | T | . | PA:.        | intergen  | NR_dist=  | .   | .      |
| ACa06 | 5 | #### | rs3759258 | G | T | . | PA:.        | intergen  | NR_dist=  | .   | .      |
| ACa06 | 5 | #### | rs8790446 | T | C | . | PA:NBPF22P  | ncRNA_NR_ | .         | .   | .      |
| ACa06 | 5 | #### | .         | G | A | . | PA:LOC10013 | ncRNA_NR_ | .         | .   | .      |
| ACa06 | 5 | #### | .         | A | C | . | PA:SLC36A2  | intronic  | NM_       | .   | .      |
| ACa06 | 5 | #### | .         | A | G | . | PA:CCNG1    | intronic  | NM_       | .   | .      |
| ACa06 | 5 | #### | .         | C | A | . | PA:COL23A1  | exonic    | NM_       | mis | COL23/ |
| ACa06 | 5 | #### | .         | C | A | . | PA:ADAMTS2  | intronic  | NM_       | .   | .      |
| ACa06 | 6 | #### | rs3719775 | T | C | . | PA:.        | upstream  | NM_       | .   | .      |
| ACa06 | 6 | #### | rs9202904 | C | G | . | PA:.        | upstream  | NM_       | .   | .      |
| ACa06 | 6 | #### | rs4292554 | A | G | . | PA:.        | intergen  | NR_dist=  | .   | .      |
| ACa06 | 6 | #### | rs4437505 | G | T | . | PA:.        | intergen  | NR_dist=  | .   | .      |
| ACa06 | 6 | #### | rs7508774 | C | T | . | PA:KIAA1244 | intronic  | NM_       | .   | .      |
| ACa06 | 6 | #### | .         | A | C | . | PA:SYNE1    | intronic  | NM_       | .   | .      |
| ACa06 | 6 | #### | rs1436754 | G | A | . | PA:TCP10L2  | intronic  | NM_       | .   | .      |
| ACa06 | 6 | #### | .         | A | G | . | PA:WDR27    | intronic  | NM_       | .   | .      |
| ACa06 | 7 | #### | .         | A | C | . | PA:SDK1     | intronic  | NM_       | .   | .      |
| ACa06 | 7 | #### | rs2016650 | T | A | . | PA:RSPH10B  | intronic  | NM_       | .   | .      |
| ACa06 | 7 | #### | .         | T | G | . | PA:.        | intergen  | NM_dist=  | .   | .      |
| ACa06 | 7 | #### | .         | C | G | . | PA:.        | intergen  | NR_dist=  | .   | .      |
| ACa06 | 7 | #### | .         | C | G | . | PA:.        | intergen  | NR_dist=  | .   | .      |
| ACa06 | 7 | #### | .         | C | G | . | PA:.        | intergen  | NR_dist=  | .   | .      |
| ACa06 | 7 | #### | .         | C | A | . | PA:.        | intergen  | NR_dist=  | .   | .      |
| ACa06 | 7 | #### | .         | G | T | . | PA:.        | intergen  | NR_dist=  | .   | .      |

|       |    |      |           |   |   |   |             |            |            |            |
|-------|----|------|-----------|---|---|---|-------------|------------|------------|------------|
| ACa06 | 7  | #### | .         | C | T | . | PA:.        | intergen   | NR_dist=.  | .          |
| ACa06 | 7  | #### | .         | A | C | . | PA:.        | intergen   | NR_dist=.  | .          |
| ACa06 | 7  | #### | rs4596537 | C | A | . | PA:.        | intergen   | NOI_dist=. | .          |
| ACa06 | 7  | #### | rs2167825 | A | C | . | PA:.        | intergen   | NOI_dist=. | .          |
| ACa06 | 7  | #### | rs586765  | G | T | . | PA:.        | intergen   | NR_dist=.  | .          |
| ACa06 | 7  | #### | rs8688020 | G | A | . | PA:.        | intergen   | NR_dist=.  | .          |
| ACa06 | 7  | #### | rs2462259 | C | T | . | PA:DTX2     | intronic   | NM_.       | .          |
| ACa06 | 7  | #### | rs6248349 | G | A | . | PA:POLR2J2  | intronic   | NM_.       | .          |
| ACa06 | 7  | #### | rs3741264 | C | G | . | PA:LINC0100 | ncRNA_NR_. | .          | .          |
| ACa06 | 7  | #### | .         | T | C | . | PA:KMT2C    | intronic   | NM_.       | .          |
| ACa06 | 8  | #### | rs2077351 | A | C | . | PA:.        | intergen   | NM_dist=.  | .          |
| ACa06 | 8  | #### | .         | T | G | . | PA:PPAPDC1  | intronic   | NM_.       | .          |
| ACa06 | 8  | #### | rs7503847 | T | G | . | PA:.        | intergen   | NM_dist=.  | .          |
| ACa06 | 8  | #### | rs7967153 | G | A | . | PA:.        | intergen   | NM_dist=.  | .          |
| ACa06 | 8  | #### | .         | A | G | . | PA:.        | intergen   | NM_dist=.  | .          |
| ACa06 | 8  | #### | rs4363208 | C | G | . | PA:.        | intergen   | NOI_dist=. | .          |
| ACa06 | 8  | #### | rs3740584 | G | C | . | PA:.        | intergen   | NOI_dist=. | .          |
| ACa06 | 8  | #### | .         | C | T | . | PA:.        | ncRNA_NR_. | .          | .          |
| ACa06 | 8  | #### | .         | G | A | . | PA:ARC      | exonic     | NM_.       | mis ARC:NM |
| ACa06 | 8  | #### | rs7821104 | T | G | . | PA:OPLAH    | intronic   | NM_.       | .          |
| ACa06 | 9  | #### | rs7495042 | G | A | . | PA:.        | upstream   | NR_.       | .          |
| ACa06 | 9  | #### | rs4928839 | A | C | . | PA:.        | intergen   | NM_dist=.  | .          |
| ACa06 | 9  | #### | rs4568707 | G | A | . | PA:LOC64226 | ncRNA_NR_. | .          | .          |
| ACa06 | 9  | #### | rs1435617 | T | C | . | PA:.        | intergen   | NM_dist=.  | .          |
| ACa06 | 9  | #### | rs3773733 | T | C | . | PA:.        | intergen   | NM_dist=.  | .          |
| ACa06 | 9  | #### | .         | C | G | . | PA:NXNL2    | intronic   | NM_.       | .          |
| ACa06 | 9  | #### | .         | T | G | . | PA:.        | intergen   | NM_dist=.  | .          |
| ACa06 | 9  | #### | .         | C | T | . | PA:MAPKAP1  | intronic   | NM_.       | .          |
| ACa06 | 10 | #### | rs1397322 | T | C | . | PA:.        | intergen   | NM_dist=.  | .          |
| ACa06 | 10 | #### | .         | G | T | . | PA:MIR603   | ncRNA_NR_. | .          | .          |
| ACa06 | 10 | #### | rs9631413 | T | C | . | PA:.        | intergen   | NM_dist=.  | .          |
| ACa06 | 10 | #### | .         | T | C | . | PA:CREM     | intronic   | NM_.       | .          |
| ACa06 | 10 | #### | rs694157  | A | G | . | PA:.        | intergen   | NR_dist=.  | .          |
| ACa06 | 10 | #### | rs5275172 | G | A | . | PA:.        | intergen   | NM_dist=.  | .          |
| ACa06 | 10 | #### | rs1888127 | G | A | . | PA:DLG5     | intronic   | NM_.       | .          |
| ACa06 | 10 | #### | rs2573327 | T | C | . | PA:.        | intergen   | NM_dist=.  | .          |
| ACa06 | 10 | #### | rs3128226 | C | G | . | PA:NUTM2A   | intronic   | NM_.       | .          |
| ACa06 | 11 | #### | .         | T | C | . | PA:.        | intergen   | NR_dist=.  | .          |
| ACa06 | 11 | #### | .         | G | A | . | PA:.        | intergen   | NR_dist=.  | .          |
| ACa06 | 11 | #### | rs9035709 | C | T | . | PA:.        | intergen   | NR_dist=.  | .          |
| ACa06 | 11 | #### | rs1874489 | T | C | . | PA:.        | intergen   | NM_dist=.  | .          |
| ACa06 | 11 | #### | rs9666739 | G | T | . | PA:PRKRIR   | exonic     | NM_.       | mis PRKRIF |
| ACa06 | 11 | #### | rs5688517 | G | A | . | PA:.        | intergen   | NM_dist=.  | .          |
| ACa06 | 11 | #### | .         | G | A | . | PA:OR8G5    | exonic     | NM_.       | mis OR8G5  |
| ACa06 | 11 | #### | .         | T | G | . | PA:NTM      | intronic   | NM_.       | .          |
| ACa06 | 12 | #### | rs7606061 | T | C | . | PA:KRT6A    | intronic   | NM_.       | .          |
| ACa06 | 12 | #### | .         | T | C | . | PA:ERBB3    | exonic     | NM_.       | mis ERBB3  |
| ACa06 | 12 | #### | rs7597010 | C | T | . | PA:TDG      | UTR5       | NM_NM_.    | .          |
| ACa06 | 13 | #### | rs2004528 | C | T | . | PA:.        | intergen   | NR_dist=.  | .          |
| ACa06 | 13 | #### | rs1510074 | G | A | . | PA:MYO16    | exonic     | NM_.       | syr MYO16  |
| ACa06 | 14 | #### | rs7446578 | T | C | . | PA:DUXAP10  | ncRNA_NR_. | .          | .          |
| ACa06 | 14 | #### | .         | C | T | . | PA:.        | intergen   | NR_dist=.  | .          |
| ACa06 | 14 | #### | rs2006543 | C | T | . | PA:.        | intergen   | NM_dist=.  | .          |
| ACa06 | 14 | #### | rs2020426 | T | C | . | PA:.        | intergen   | NM_dist=.  | .          |



|       |    |      |           |   |   |   |             |          |            |           |
|-------|----|------|-----------|---|---|---|-------------|----------|------------|-----------|
| ACa06 | 14 | #### | rs7704695 | G | T | . | PA:.        | intergen | NM_dist=.  | .         |
| ACa06 | 14 | #### | .         | G | A | . | PA:PRKCH    | exonic   | NM_.       | unl UNKNC |
| ACa06 | 14 | #### | .         | A | T | . | PA:GSTZ1    | intronic | NM_.       | .         |
| ACa06 | 14 | #### | .         | C | T | . | PA:.        | intergen | NR_dist=.  | .         |
| ACa06 | 15 | #### | rs6200967 | C | T | . | PA:.        | intergen | NOI dist=. | .         |
| ACa06 | 15 | #### | .         | C | T | . | PA:.        | intergen | NR_dist=.  | .         |
| ACa06 | 15 | #### | .         | A | C | . | PA:.        | downstr  | NR_.       | .         |
| ACa06 | 15 | #### | rs7751825 | G | C | . | PA:GOLGA8T  | ncRNA_   | NR_.       | .         |
| ACa06 | 15 | #### | rs2449652 | T | C | . | PA:LOC10028 | ncRNA_   | NR_.       | .         |
| ACa06 | 15 | #### | rs2449653 | T | C | . | PA:LOC10028 | ncRNA_   | NR_.       | .         |
| ACa06 | 15 | #### | .         | G | A | . | PA:GOLGA8k  | intronic | NM_.       | .         |
| ACa06 | 15 | #### | .         | G | A | . | PA:.        | upstream | NM_.       | .         |
| ACa06 | 15 | #### | rs6202600 | G | A | . | PA:.        | intergen | NM_dist=.  | .         |
| ACa06 | 15 | #### | .         | A | C | . | PA:SLC27A2  | intronic | NM_.       | .         |
| ACa06 | 15 | #### | .         | T | A | . | PA:SNX1     | UTR5     | NM_NM_.    | .         |
| ACa06 | 15 | #### | .         | C | T | . | PA:GOLGA6L  | exonic   | NM_.       | mis GOLGA |
| ACa06 | 15 | #### | rs3743150 | T | G | . | PA:.        | intergen | NM_dist=.  | .         |
| ACa06 | 15 | #### | rs9700260 | C | G | . | PA:GOLGA6L  | ncRNA_   | NR_.       | .         |
| ACa06 | 15 | #### | rs364085  | T | C | . | PA:.        | upstream | NR_.       | .         |
| ACa06 | 16 | #### | rs2009400 | G | A | . | PA:.        | intergen | NR_dist=.  | .         |
| ACa06 | 16 | #### | rs2016432 | C | T | . | PA:.        | intergen | NR_dist=.  | .         |
| ACa06 | 16 | #### | .         | C | T | . | PA:.        | intergen | NR_dist=.  | .         |
| ACa06 | 16 | #### | rs5667377 | T | C | . | PA:.        | intergen | NR_dist=.  | .         |
| ACa06 | 16 | #### | rs5618411 | T | C | . | PA:RRN3P2   | ncRNA_   | NR_.       | .         |
| ACa06 | 16 | #### | rs8792106 | A | T | . | PA:.        | downstr  | NR_.       | .         |
| ACa06 | 16 | #### | rs4319791 | C | T | . | PA:.        | intergen | NOI dist=. | .         |
| ACa06 | 16 | #### | rs4349321 | G | A | . | PA:.        | intergen | NOI dist=. | .         |
| ACa06 | 16 | #### | rs4246344 | G | A | . | PA:.        | intergen | NOI dist=. | .         |
| ACa06 | 16 | #### | .         | A | T | . | PA:.        | intergen | NOI dist=. | .         |
| ACa06 | 16 | #### | rs8799648 | A | G | . | PA:.        | intergen | NOI dist=. | .         |
| ACa06 | 16 | #### | rs9972801 | A | G | . | PA:.        | intergen | NOI dist=. | .         |
| ACa06 | 16 | #### | rs4324300 | G | A | . | PA:.        | intergen | NOI dist=. | .         |
| ACa06 | 16 | #### | rs9328621 | T | C | . | PA:.        | intergen | NOI dist=. | .         |
| ACa06 | 16 | #### | rs4380209 | C | T | . | PA:.        | intergen | NOI dist=. | .         |
| ACa06 | 16 | #### | rs4291933 | A | G | . | PA:.        | intergen | NOI dist=. | .         |
| ACa06 | 16 | #### | rs4011858 | G | C | . | PA:.        | intergen | NOI dist=. | .         |
| ACa06 | 16 | #### | .         | G | C | . | PA:.        | intergen | NOI dist=. | .         |
| ACa06 | 16 | #### | rs7205231 | T | A | . | PA:.        | intergen | NOI dist=. | .         |
| ACa06 | 16 | #### | rs4093117 | C | A | . | PA:.        | intergen | NOI dist=. | .         |
| ACa06 | 16 | #### | rs4249029 | G | A | . | PA:.        | intergen | NOI dist=. | .         |
| ACa06 | 16 | #### | .         | C | T | . | PA:.        | intergen | NOI dist=. | .         |
| ACa06 | 16 | #### | rs6205366 | G | A | . | PA:.        | ncRNA_   | NR_.       | .         |
| ACa06 | 17 | #### | rs2543804 | G | A | . | PA:CCDC144  | ncRNA_   | NR_.       | .         |
| ACa06 | 17 | #### | rs7126379 | T | C | . | PA:.        | upstream | NR_.       | .         |
| ACa06 | 17 | #### | rs7126379 | G | A | . | PA:.        | upstream | NR_.       | .         |
| ACa06 | 17 | #### | rs7841783 | G | A | . | PA:FLJ36000 | ncRNA_   | NR_.       | .         |
| ACa06 | 17 | #### | .         | T | A | . | PA:.        | intergen | NM_dist=.  | .         |
| ACa06 | 17 | #### | rs1437650 | T | G | . | PA:.        | intergen | NM_dist=.  | .         |
| ACa06 | 17 | #### | .         | G | A | . | PA:.        | intergen | NM_dist=.  | .         |
| ACa06 | 17 | #### | rs6207957 | C | T | . | PA:.        | intronic | NM_.       | .         |
| ACa06 | 17 | #### | rs7482024 | G | T | . | PA:KRTAP9-7 | exonic   | NM_.       | syr KRTAP |
| ACa06 | 17 | #### | rs1459625 | G | A | . | PA:TUBG1    | intronic | NM_.       | .         |
| ACa06 | 17 | #### | .         | A | T | . | PA:.        | intergen | NR_dist=.  | .         |
| ACa06 | 18 | #### | rs2012257 | C | G | . | PA:.        | intergen | NM_dist=.  | .         |

|       |    |      |           |   |   |   |              |            |            |             |
|-------|----|------|-----------|---|---|---|--------------|------------|------------|-------------|
| ACa06 | 18 | #### | rs3734996 | A | T | . | PA:.         | intergen   | NM_dist=.  | .           |
| ACa06 | 18 | #### | rs7520640 | G | A | . | PA:SERPINB   | intronic   | NM_.       | .           |
| ACa06 | 19 | #### | .         | A | C | . | PA:ARRDC5    | intronic   | NM_.       | .           |
| ACa06 | 19 | #### | .         | T | A | . | PA:CD22      | intronic   | NM_.       | .           |
| ACa06 | 19 | #### | rs7641371 | G | T | . | PA:.         | intergen   | NR_dist=.  | .           |
| ACa06 | 19 | #### | .         | G | A | . | PA:.         | intergen   | NR_dist=.  | .           |
| ACa06 | 19 | #### | .         | C | A | . | PA:.         | upstrear   | NM_.       | .           |
| ACa06 | 19 | #### | .         | T | A | . | PA:EML2      | intronic   | NM_.       | .           |
| ACa06 | 19 | #### | rs3499068 | A | G | . | PA:.         | downstr    | NR_.       | .           |
| ACa06 | 19 | #### | rs5615613 | C | T | . | PA:.         | downstr    | NR_.       | .           |
| ACa06 | 19 | #### | rs1334652 | G | A | . | PA:LILRA6,LI | intronic   | NM_.       | .           |
| ACa06 | 19 | #### | rs3751555 | G | A | . | PA:.         | intergen   | NM_dist=.  | .           |
| ACa06 | 20 | #### | .         | C | T | . | PA:NCOA6     | exonic     | NM_.       | syr NCOA6   |
| ACa06 | 21 | #### | rs7984422 | A | G | . | PA:.         | intergen   | NOI dist=. | .           |
| ACa06 | 21 | #### | rs2017188 | T | C | . | PA:.         | intergen   | NM_dist=.  | .           |
| ACa06 | 22 | #### | rs3753995 | G | A | . | PA:.         | intergen   | NM_dist=.  | .           |
| ACa06 | 22 | #### | .         | A | T | . | PA:.         | intergen   | NM_dist=.  | .           |
| ACa06 | 22 | #### | rs2021509 | A | G | . | PA:.         | intergen   | NM_dist=.  | .           |
| ACa06 | 22 | #### | .         | T | G | . | PA:DGCR6L,   | intergen   | NM_dist=.  | .           |
| ACa06 | 22 | #### | rs6221896 | C | T | . | PA:.         | intergen   | NM_dist=.  | .           |
| ACa06 | 22 | #### | rs2016329 | G | T | . | PA:.         | intergen   | NR_dist=.  | .           |
| ACa06 | 22 | #### | rs6223125 | C | T | . | PA:POM121L   | ncRNA_NR_. | .          | .           |
| ACa06 | 22 | #### | rs367416  | T | C | . | PA:.         | intergen   | NM_dist=.  | .           |
| ACa06 | 22 | #### | rs3609392 | C | T | . | PA:CYP2D7    | ncRNA_NR_. | .          | .           |
| ACa06 | 22 | #### | .         | C | A | . | PA:RRP7A     | intronic   | NM_.       | .           |
| ACa06 | 22 | #### | .         | G | A | . | PA:PARVG     | intronic   | NM_.       | .           |
| ACa06 | X  | #### | .         | C | T | . | PA:KDM5C     | UTR5       | NM_NM_.    | .           |
| ACa06 | X  | #### | .         | G | C | . | PA:.         | intergen   | NOI dist=. | .           |
| ACa06 | X  | #### | .         | C | T | . | PA:.         | intergen   | NOI dist=. | .           |
| ACa06 | X  | #### | rs7520049 | T | C | . | PA:.         | intergen   | NOI dist=. | .           |
| ACa06 | X  | #### | rs7756689 | A | G | . | PA:.         | intergen   | NOI dist=. | .           |
| ACa06 | X  | #### | .         | A | C | . | PA:.         | intergen   | NOI dist=. | .           |
| ACa06 | X  | #### | rs1048883 | C | T | . | PA:SNX12     | exonic     | NM_.       | mis SNX12:  |
| ACa06 | X  | #### | .         | T | A | . | PA:.         | intergen   | NM_dist=.  | .           |
| ACa06 | X  | #### | .         | G | A | . | PA:NHSL2     | exonic     | NM_.       | mis NHSL2:  |
| ACa06 | X  | #### | rs1423249 | G | A | . | PA:.         | intergen   | NM_dist=.  | .           |
| ACa06 | X  | #### | .         | C | T | . | PA:.         | intergen   | NM_dist=.  | .           |
| ACa07 | 1  | #### | rs3744991 | C | T | . | PA:LINC0100  | ncRNA_NR_. | .          | .           |
| ACa07 | 1  | #### | .         | C | T | . | PA:NOC2L     | intronic   | NM_.       | .           |
| ACa07 | 1  | #### | rs1159856 | C | T | . | PA:KLHL17    | exonic     | NM_.       | syr KLHL17  |
| ACa07 | 1  | #### | .         | G | A | . | PA:PERM1     | exonic     | NM_.       | unl UNKNC   |
| ACa07 | 1  | #### | .         | C | T | . | PA:ISG15     | exonic     | NM_.       | mis ISG15:† |
| ACa07 | 1  | #### | rs5413521 | C | T | . | PA:FAM132A   | UTR3       | NM_NM_.    | .           |
| ACa07 | 1  | #### | rs7680451 | C | T | . | PA:UBE2J2    | intronic   | NM_.       | .           |
| ACa07 | 1  | #### | .         | G | A | . | PA:CPTP      | intronic   | NM_.       | .           |
| ACa07 | 1  | #### | .         | C | T | . | PA:MXRA8     | exonic     | NM_.       | mis MXRA8   |
| ACa07 | 1  | #### | rs7800811 | C | T | . | PA:CCNL2     | intronic   | NM_.       | .           |
| ACa07 | 1  | #### | .         | G | A | . | PA:MIB2      | intronic   | NM_.       | .           |
| ACa07 | 1  | #### | rs2014492 | C | T | . | PA:CDK11B    | intronic   | NM_.       | .           |
| ACa07 | 1  | #### | rs7463384 | G | A | . | PA:CDK11B    | exonic     | NM_.       | unl UNKNC   |
| ACa07 | 1  | #### | .         | C | T | . | PA:CDK11B    | intronic   | NM_.       | .           |
| ACa07 | 1  | #### | .         | C | T | . | PA:CDK11B    | intronic   | NM_.       | .           |
| ACa07 | 1  | #### | .         | C | A | . | PA:GABRD     | exonic     | NM_.       | syr GABRD   |
| ACa07 | 1  | #### | .         | G | A | . | PA:PRKCZ     | intronic   | NM_.       | .           |

|       |   |      |           |   |   |   |            |          |          |     |         |
|-------|---|------|-----------|---|---|---|------------|----------|----------|-----|---------|
| ACa07 | 1 | #### | .         | G | A | . | PA:PEX10   | intronic | NM_.     | .   | .       |
| ACa07 | 1 | #### | .         | A | G | . | PA:MEGF6   | exonic   | NM_.     | syr | MEGF6   |
| ACa07 | 1 | #### | .         | C | A | . | PA:DFFB    | intronic | NM_.     | .   | .       |
| ACa07 | 1 | #### | .         | G | T | . | PA:NPHP4   | exonic   | NM_.     | unl | UNKNC   |
| ACa07 | 1 | #### | .         | G | A | . | PA:NPHP4   | intronic | NM_.     | .   | .       |
| ACa07 | 1 | #### | rs9430027 | C | T | . | PA:CHD5    | intronic | NM_.     | .   | .       |
| ACa07 | 1 | #### | .         | C | T | . | PA:CHD5    | exonic   | NM_.     | mis | CHD5:M  |
| ACa07 | 1 | #### | .         | C | T | . | PA:CHD5    | exonic   | NM_.     | mis | CHD5:M  |
| ACa07 | 1 | #### | rs9864160 | G | A | . | PA:RNF207  | intronic | NM_.     | .   | .       |
| ACa07 | 1 | #### | rs7562596 | C | T | . | PA:ZBTB48  | intronic | NM_.     | .   | .       |
| ACa07 | 1 | #### | rs1431018 | C | T | . | PA:CAMTA1  | exonic   | NM_.     | syr | CAMTA   |
| ACa07 | 1 | #### | .         | T | A | . | PA:CAMTA1  | intronic | NM_.     | .   | .       |
| ACa07 | 1 | #### | rs7748471 | C | T | . | PA:CAMTA1  | exonic   | NM_.     | syr | CAMTA   |
| ACa07 | 1 | #### | rs9446685 | C | T | . | PA:SLC2A7  | intronic | NM_.     | .   | .       |
| ACa07 | 1 | #### | rs1476580 | G | A | . | PA:GPR157  | exonic   | NM_.     | mis | GPR157  |
| ACa07 | 1 | #### | .         | C | T | . | PA:SLC25A3 | intronic | NM_.     | .   | .       |
| ACa07 | 1 | #### | .         | C | T | . | PA:CLCN6   | intronic | NM_.     | .   | .       |
| ACa07 | 1 | #### | .         | A | G | . | PA:.       | intergen | NM_dist= | .   | .       |
| ACa07 | 1 | #### | rs7934532 | C | T | . | PA:PLOD1   | intronic | NM_.     | .   | .       |
| ACa07 | 1 | #### | .         | C | T | . | PA:TNFRSF8 | intronic | NM_.     | .   | .       |
| ACa07 | 1 | #### | .         | G | T | . | PA:VPS13D  | intronic | NM_.     | .   | .       |
| ACa07 | 1 | #### | .         | C | T | . | PA:VPS13D  | exonic   | NM_.     | mis | VPS13D  |
| ACa07 | 1 | #### | rs2021163 | G | C | . | PA:PRAMEF4 | intronic | NM_.     | .   | .       |
| ACa07 | 1 | #### | rs5876978 | C | T | . | PA:PRAMEF1 | intronic | NM_.     | .   | .       |
| ACa07 | 1 | #### | rs4646008 | G | A | . | PA:CASP9   | exonic   | NM_.     | mis | CASP9   |
| ACa07 | 1 | #### | rs3745685 | C | T | . | PA:EPHA2   | UTR3     | NM_NM_.  | .   | .       |
| ACa07 | 1 | #### | .         | G | A | . | PA:ARHGEF1 | exonic   | NM_.     | mis | ARHGEF1 |
| ACa07 | 1 | #### | rs3734377 | G | A | . | PA:NBPF1   | exonic   | NM_.     | unl | UNKNC   |
| ACa07 | 1 | #### | rs6177234 | C | A | . | PA:NBPF1   | intronic | NM_.     | .   | .       |
| ACa07 | 1 | #### | rs4112521 | T | C | . | PA:NBPF1   | intronic | NM_.     | .   | .       |
| ACa07 | 1 | #### | rs1213433 | A | T | . | PA:NBPF1   | UTR5     | NM_NM_.  | .   | .       |
| ACa07 | 1 | #### | rs3930814 | G | A | . | PA:.       | upstream | NR_.     | .   | .       |
| ACa07 | 1 | #### | rs5780915 | G | A | . | PA:ATP13A2 | intronic | NM_.     | .   | .       |
| ACa07 | 1 | #### | rs3774826 | C | T | . | PA:IGSF21  | exonic   | NM_.     | mis | IGSF21  |
| ACa07 | 1 | #### | rs3766882 | C | T | . | PA:TAS1R2  | exonic   | NM_.     | mis | TAS1R2  |
| ACa07 | 1 | #### | rs3471023 | G | A | . | PA:UBR4    | exonic   | NM_.     | syr | UBR4:M  |
| ACa07 | 1 | #### | .         | G | A | . | PA:UBR4    | exonic   | NM_.     | syr | UBR4:M  |
| ACa07 | 1 | #### | .         | A | G | . | PA:MRTO4   | intronic | NM_.     | .   | .       |
| ACa07 | 1 | #### | rs3712996 | C | T | . | PA:CAPZB   | UTR3     | NM_NM_.  | .   | .       |
| ACa07 | 1 | #### | .         | G | A | . | PA:TMCO4   | intronic | NM_.     | .   | .       |
| ACa07 | 1 | #### | rs1001195 | G | A | . | PA:RAP1GAF | intronic | NM_.     | .   | .       |
| ACa07 | 1 | #### | .         | C | T | . | PA:HSPG2   | intronic | NM_.     | .   | .       |
| ACa07 | 1 | #### | .         | A | G | . | PA:HSPG2   | exonic   | NM_.     | unl | UNKNC   |
| ACa07 | 1 | #### | rs7584776 | C | T | . | PA:.       | upstream | NM_.     | .   | .       |
| ACa07 | 1 | #### | .         | C | A | . | PA:CELA3A  | exonic   | NM_.     | mis | CELA3A  |
| ACa07 | 1 | #### | .         | G | A | . | PA:.       | intronic | NM_.     | .   | .       |
| ACa07 | 1 | #### | .         | G | T | . | PA:GALE    | UTR3     | NM_NM_.  | .   | .       |
| ACa07 | 1 | #### | rs1391690 | C | T | . | PA:HMGCL   | intronic | NM_.     | .   | .       |
| ACa07 | 1 | #### | rs7518873 | G | A | . | PA:RUNX3   | exonic   | NM_.     | syr | RUNX3   |
| ACa07 | 1 | #### | .         | G | T | . | PA:RHCE    | intronic | NM_.     | .   | .       |
| ACa07 | 1 | #### | .         | G | A | . | PA:MAN1C1  | intronic | NM_.     | .   | .       |
| ACa07 | 1 | #### | .         | G | A | . | PA:STMN1   | intronic | NM_.     | .   | .       |
| ACa07 | 1 | #### | .         | C | T | . | PA:FAM110D | exonic   | NM_.     | syr | FAM110D |
| ACa07 | 1 | #### | rs7737670 | C | T | . | PA:CNKSR1  | exonic   | NM_.     | mis | CNKSR1  |

|       |   |      |           |   |   |   |             |          |           |     |        |
|-------|---|------|-----------|---|---|---|-------------|----------|-----------|-----|--------|
| ACa07 | 1 | #### | rs7767332 | C | T | . | PA:UBXN11   | exonic   | NM_.      | mis | UBXN1  |
| ACa07 | 1 | #### | .         | G | A | . | PA:RPS6KA1  | exonic   | NM_.      | mis | RPS6K  |
| ACa07 | 1 | #### | rs8792552 | C | T | . | PA:ARID1A   | exonic   | NM_.      | sto | ARID1A |
| ACa07 | 1 | #### | .         | C | T | . | PA:ZDHHC18  | exonic   | NM_.      | mis | ZDHHC  |
| ACa07 | 1 | #### | rs1003250 | G | A | . | PA:SLC9A1   | intronic | NM_.      | .   | .      |
| ACa07 | 1 | #### | rs7625790 | C | T | . | PA:SLC9A1   | intronic | NM_.      | .   | .      |
| ACa07 | 1 | #### | rs9468364 | G | A | . | PA:WDTC1    | intronic | NM_.      | .   | .      |
| ACa07 | 1 | #### | .         | C | T | . | PA:LOC64496 | ncRNA_   | NR_.      | .   | .      |
| ACa07 | 1 | #### | .         | G | A | . | PA:EYA3     | intronic | NM_.      | .   | .      |
| ACa07 | 1 | #### | .         | G | C | . | PA:YTHDF2   | intronic | NM_.      | .   | .      |
| ACa07 | 1 | #### | rs7596455 | G | A | . | PA:FABP3    | exonic   | NM_.      | syr | FABP3: |
| ACa07 | 1 | #### | rs9232513 | G | A | . | PA:SPOCD1   | exonic   | NM_.      | mis | SPOCD  |
| ACa07 | 1 | #### | .         | G | A | . | PA:TMEM39E  | intronic | NM_.      | .   | .      |
| ACa07 | 1 | #### | .         | C | A | . | PA:LCK      | exonic   | NM_.      | mis | LCK:NM |
| ACa07 | 1 | #### | .         | G | A | . | PA:.        | intergen | NM_dist=. | .   | .      |
| ACa07 | 1 | #### | .         | C | T | . | PA:S100PBP  | intronic | NM_.      | .   | .      |
| ACa07 | 1 | #### | rs9651423 | A | G | . | PA:ZMYM4    | intronic | NM_.      | .   | .      |
| ACa07 | 1 | #### | rs7723940 | G | A | . | PA:RSPO1    | exonic   | NM_.      | mis | RSPO1  |
| ACa07 | 1 | #### | .         | G | A | . | PA:C1orf109 | intronic | NM_.      | .   | .      |
| ACa07 | 1 | #### | rs1814745 | C | T | . | PA:EPHA10   | intronic | NM_.      | .   | .      |
| ACa07 | 1 | #### | .         | C | T | . | PA:MACF1    | intronic | NM_.      | .   | .      |
| ACa07 | 1 | #### | .         | G | A | . | PA:MACF1    | intronic | NM_.      | .   | .      |
| ACa07 | 1 | #### | .         | A | C | . | PA:MACF1    | UTR3     | NM_NM_.   | .   | .      |
| ACa07 | 1 | #### | rs5523408 | C | T | . | PA:PPIEL    | ncRNA_   | NR_.      | .   | .      |
| ACa07 | 1 | #### | .         | G | T | . | PA:PABPC4   | intronic | NM_.      | .   | .      |
| ACa07 | 1 | #### | .         | G | A | . | PA:PPT1     | exonic   | NM_.      | mis | PPT1:N |
| ACa07 | 1 | #### | .         | T | C | . | PA:RLF      | exonic   | NM_.      | syr | RLF:NM |
| ACa07 | 1 | #### | .         | G | A | . | PA:RLF      | UTR3     | NM_NM_.   | .   | .      |
| ACa07 | 1 | #### | rs9093579 | G | T | . | PA:KCNQ4    | intronic | NM_.      | .   | .      |
| ACa07 | 1 | #### | .         | T | A | . | PA:KCNQ4    | intronic | NM_.      | .   | .      |
| ACa07 | 1 | #### | rs1179985 | C | T | . | PA:FOXJ3    | intronic | NM_.      | .   | .      |
| ACa07 | 1 | #### | rs7456140 | G | A | . | PA:YBX1     | exonic   | NM_.      | mis | YBX1:N |
| ACa07 | 1 | #### | .         | G | A | . | PA:MED8     | intronic | NM_.      | .   | .      |
| ACa07 | 1 | #### | .         | C | T | . | PA:KDM4A-A: | ncRNA_   | NR_.      | .   | .      |
| ACa07 | 1 | #### | .         | C | T | . | PA:PLK3     | intronic | NM_.      | .   | .      |
| ACa07 | 1 | #### | .         | C | A | . | PA:CCDC17   | exonic   | NM_.      | mis | CCDC1  |
| ACa07 | 1 | #### | rs7290104 | C | T | . | PA:RAD54L   | intronic | NM_.      | .   | .      |
| ACa07 | 1 | #### | .         | A | G | . | PA:FAAH     | intronic | NM_.      | .   | .      |
| ACa07 | 1 | #### | rs5508458 | C | T | . | PA:MKNK1    | exonic   | NM_.      | syr | MKNK1  |
| ACa07 | 1 | #### | .         | C | T | . | PA:CYP4Z2P  | ncRNA_   | NR_.      | .   | .      |
| ACa07 | 1 | #### | .         | G | T | . | PA:AGBL4    | intronic | NM_.      | .   | .      |
| ACa07 | 1 | #### | rs7570389 | C | T | . | PA:TTC39A   | intronic | NM_.      | .   | .      |
| ACa07 | 1 | #### | rs9512571 | C | T | . | PA:LRP8     | intronic | NM_.      | .   | .      |
| ACa07 | 1 | #### | rs7759188 | C | T | . | PA:GLIS1    | intronic | NM_.      | .   | .      |
| ACa07 | 1 | #### | .         | G | A | . | PA:CYB5RL   | exonic   | NM_.      | mis | CYB5R  |
| ACa07 | 1 | #### | rs3769455 | G | A | . | PA:PCSK9    | exonic   | NM_.      | mis | PCSK9: |
| ACa07 | 1 | #### | rs7815069 | C | T | . | PA:PRKAA2   | exonic   | NM_.      | mis | PRKAA  |
| ACa07 | 1 | #### | .         | C | T | . | PA:DAB1     | intronic | NM_.      | .   | .      |
| ACa07 | 1 | #### | .         | T | A | . | PA:JAK1     | intronic | NM_.      | .   | .      |
| ACa07 | 1 | #### | .         | C | T | . | PA:WDR78    | intronic | NM_.      | .   | .      |
| ACa07 | 1 | #### | .         | C | A | . | PA:FPGT,FP  | intronic | NM_.      | .   | .      |
| ACa07 | 1 | #### | .         | A | G | . | PA:PIGK     | intronic | NM_.      | .   | .      |
| ACa07 | 1 | #### | rs1785229 | G | A | . | PA:ELTD1    | exonic   | NM_.      | syr | ELTD1: |
| ACa07 | 1 | #### | .         | G | A | . | PA:.        | intergen | NM_dist=. | .   | .      |

|       |   |      |           |   |   |   |              |            |           |              |
|-------|---|------|-----------|---|---|---|--------------|------------|-----------|--------------|
| ACa07 | 1 | #### | rs1394863 | C | T | . | PA:LPHN2     | exonic     | NM_.      | syr LPHN2:   |
| ACa07 | 1 | #### | rs7636045 | C | T | . | PA:LPAR3     | exonic     | NM_.      | mis LPAR3:   |
| ACa07 | 1 | #### | .         | C | A | . | PA:ZNHIT6    | intronic   | NM_.      | .            |
| ACa07 | 1 | #### | .         | G | T | . | PA:TGFBR3    | intronic   | NM_.      | .            |
| ACa07 | 1 | #### | .         | G | C | . | PA:ABCA4     | exonic     | NM_.      | syr ABCA4:   |
| ACa07 | 1 | #### | rs6174943 | G | A | . | PA:ABCA4     | exonic     | NM_.      | syr ABCA4:   |
| ACa07 | 1 | #### | .         | T | A | . | PA:LRRC39    | intronic   | NM_.      | .            |
| ACa07 | 1 | #### | .         | A | T | . | PA:COL11A1   | intronic   | NM_.      | .            |
| ACa07 | 1 | #### | .         | A | C | . | PA:PRPF38B   | exonic     | NM_.      | mis PRPF38B: |
| ACa07 | 1 | #### | rs9363214 | C | T | . | PA:CELSR2    | intronic   | NM_.      | .            |
| ACa07 | 1 | #### | rs7774328 | G | A | . | PA:STRIP1    | intronic   | NM_.      | .            |
| ACa07 | 1 | #### | .         | C | T | . | PA:RBM15     | exonic     | NM_.      | mis RBM15:   |
| ACa07 | 1 | #### | .         | T | C | . | PA:CHIA      | UTR5       | NM_NM_.   | .            |
| ACa07 | 1 | #### | .         | C | T | . | PA:C1orf162  | exonic     | NM_.      | unl UNKNC    |
| ACa07 | 1 | #### | .         | T | C | . | PA:FAM212B   | UTR3       | NM_NM_.   | .            |
| ACa07 | 1 | #### | rs7556469 | C | T | . | PA:MOV10     | exonic     | NM_.      | mis MOV10:   |
| ACa07 | 1 | #### | .         | G | A | . | PA:RHOC      | exonic     | NM_.      | syr RHOC:    |
| ACa07 | 1 | #### | .         | G | T | . | PA:MAGI3     | exonic     | NM_.      | mis MAGI3:   |
| ACa07 | 1 | #### | .         | T | G | . | PA:AMPD1     | intronic   | NM_.      | .            |
| ACa07 | 1 | #### | rs3724512 | C | T | . | PA:AMPD1     | exonic     | NM_.      | mis AMPD1:   |
| ACa07 | 1 | #### | .         | G | A | . | PA:TTF2      | intronic   | NM_.      | .            |
| ACa07 | 1 | #### | .         | G | T | . | PA:SPAG17,   | intronic   | NM_.      | .            |
| ACa07 | 1 | #### | .         | C | T | . | PA:NBPF7     | intronic   | NM_.      | .            |
| ACa07 | 1 | #### | rs1041798 | C | T | . | PA:NOTCH2    | intronic   | NM_.      | .            |
| ACa07 | 1 | #### | .         | A | G | . | PA:NOTCH2    | splicing   | NM_NM_.   | .            |
| ACa07 | 1 | #### | .         | T | G | . | PA:ANKRD20   | ncRNA_NR_. | .         | .            |
| ACa07 | 1 | #### | rs9441133 | T | G | . | PA:NBPF9,NE  | exonic     | NM_.      | unl UNKNC    |
| ACa07 | 1 | #### | rs4067693 | G | C | . | PA:NBPF20,N  | intronic   | NM_.      | .            |
| ACa07 | 1 | #### | .         | A | G | . | PA:NBPF9,NE  | exonic     | NM_.      | unl UNKNC    |
| ACa07 | 1 | #### | rs7819390 | C | T | . | PA:SEC22B    | exonic     | NM_.      | unl UNKNC    |
| ACa07 | 1 | #### | rs7515424 | T | A | . | PA:NBPF25P   | ncRNA_NR_. | .         | .            |
| ACa07 | 1 | #### | .         | C | T | . | PA:NBPF25P   | ncRNA_NR_. | .         | .            |
| ACa07 | 1 | #### | .         | C | T | . | PA:POLR3C    | exonic     | NM_.      | mis POLR3C:  |
| ACa07 | 1 | #### | .         | G | A | . | PA:NBPF25P   | ncRNA_NR_. | .         | .            |
| ACa07 | 1 | #### | .         | G | A | . | PA:LOC101006 | ncRNA_NR_. | .         | .            |
| ACa07 | 1 | #### | .         | C | T | . | PA:NBPF25P   | ncRNA_NR_. | .         | .            |
| ACa07 | 1 | #### | .         | C | T | . | PA:TARS2     | intronic   | NM_.      | .            |
| ACa07 | 1 | #### | .         | G | A | . | PA:PI4KB     | exonic     | NM_.      | sto PI4KB:1  |
| ACa07 | 1 | #### | .         | T | C | . | PA:POGZ      | exonic     | NM_.      | mis POGZ:1   |
| ACa07 | 1 | #### | .         | G | A | . | PA:FLG2      | exonic     | NM_.      | syr FLG2:N   |
| ACa07 | 1 | #### | rs9479104 | C | T | . | PA:PGLYRP3   | intronic   | NM_.      | .            |
| ACa07 | 1 | #### | .         | C | T | . | PA:S100A16   | intronic   | NM_.      | .            |
| ACa07 | 1 | #### | .         | A | G | . | PA:INTS3     | intronic   | NM_.      | .            |
| ACa07 | 1 | #### | rs7704251 | G | A | . | PA:DENND4E   | exonic     | NM_.      | mis DENND4E: |
| ACa07 | 1 | #### | .         | C | A | . | PA:UBE2Q1    | splicing   | NM_NM_.   | .            |
| ACa07 | 1 | #### | .         | C | T | . | PA:MTX1      | intronic   | NM_.      | .            |
| ACa07 | 1 | #### | .         | C | A | . | PA:ASH1L     | exonic     | NM_.      | mis ASH1L:   |
| ACa07 | 1 | #### | .         | C | A | . | PA:YY1AP1    | intronic   | NM_.      | .            |
| ACa07 | 1 | #### | rs9321901 | C | T | . | PA:PMF1      | UTR3       | NM_NM_.   | .            |
| ACa07 | 1 | #### | .         | T | C | . | PA:ARHGEF1   | intronic   | NM_.      | .            |
| ACa07 | 1 | #### | rs3718046 | C | T | . | PA:ETV3L     | exonic     | NM_.      | mis ETV3L:   |
| ACa07 | 1 | #### | rs2000983 | A | G | . | PA:.         | intergen   | NM_dist=. | .            |
| ACa07 | 1 | #### | rs7734794 | G | A | . | PA:CD1B      | exonic     | NM_.      | syr CD1B:N   |
| ACa07 | 1 | #### | rs7622475 | C | T | . | PA:CRP       | intronic   | NM_.      | .            |

|       |   |      |           |   |   |   |             |           |           |             |
|-------|---|------|-----------|---|---|---|-------------|-----------|-----------|-------------|
| ACa07 | 1 | #### | .         | G | A | . | PA:ADAMTS4  | exonic    | NM_.      | mi& ADAMT   |
| ACa07 | 1 | #### | rs2010794 | C | T | . | PA:C1orf226 | exonic    | NM_.      | syr C1orf22 |
| ACa07 | 1 | #### | .         | C | A | . | PA:RGS4     | exonic    | NM_.      | mi& RGS4:N  |
| ACa07 | 1 | #### | .         | A | G | . | PA:PBX1     | exonic    | NM_.      | mi& PBX1:N  |
| ACa07 | 1 | #### | .         | C | T | . | PA:POU2F1   | exonic    | NM_.      | syr POU2F   |
| ACa07 | 1 | #### | .         | G | A | . | PA:CCDC181  | intronic  | NM_.      | .           |
| ACa07 | 1 | #### | .         | A | G | . | PA:SELP     | intronic  | NM_.      | .           |
| ACa07 | 1 | #### | .         | C | T | . | PA:SCYL3    | intronic  | NM_.      | .           |
| ACa07 | 1 | #### | .         | G | A | . | PA:RABGAP1  | intronic  | NM_.      | .           |
| ACa07 | 1 | #### | .         | T | G | . | PA:PAPPA2   | intronic  | NM_.      | .           |
| ACa07 | 1 | #### | rs7763360 | C | T | . | PA:ASTN1    | exonic    | NM_.      | syr ASTN1:  |
| ACa07 | 1 | #### | .         | C | A | . | PA:ABL2     | exonic    | NM_.      | sto ABL2:N  |
| ACa07 | 1 | #### | rs1014592 | C | T | . | PA:NPHS2    | UTR5      | NM_NM_.   | .           |
| ACa07 | 1 | #### | .         | C | T | . | PA:CEP350   | intronic  | NM_.      | .           |
| ACa07 | 1 | #### | rs7733795 | C | A | . | PA:CACNA1E  | exonic    | NM_.      | mi& CACNA   |
| ACa07 | 1 | #### | rs7640679 | G | A | . | PA:ZNF648   | exonic    | NM_.      | mi& ZNF64&  |
| ACa07 | 1 | #### | .         | G | A | . | PA:TEDDM1   | exonic    | NM_.      | mi& TEDDM   |
| ACa07 | 1 | #### | rs7702036 | C | T | . | PA:NPL      | exonic    | NM_.      | mi& NPL:NM  |
| ACa07 | 1 | #### | .         | C | A | . | PA:TPR      | exonic    | NM_.      | mi& TPR:NM  |
| ACa07 | 1 | #### | .         | C | T | . | PA:CRB1     | intronic  | NM_.      | .           |
| ACa07 | 1 | #### | .         | A | G | . | PA:CAMSAP2  | intronic  | NM_.      | .           |
| ACa07 | 1 | #### | rs3712350 | G | A | . | PA:KIF21B   | exonic    | NM_.      | mi& KIF21B  |
| ACa07 | 1 | #### | rs3723002 | C | T | . | PA:CACNA1S  | intronic  | NM_.      | .           |
| ACa07 | 1 | #### | rs3694010 | G | A | . | PA:NAV1     | exonic    | NM_.      | mi& NAV1:N  |
| ACa07 | 1 | #### | .         | G | T | . | PA:TIMM17A  | intronic  | NM_.      | .           |
| ACa07 | 1 | #### | rs1044866 | C | T | . | PA:ETNK2    | intronic  | NM_.      | .           |
| ACa07 | 1 | #### | .         | C | T | . | PA:CNTN2    | intronic  | NM_.      | .           |
| ACa07 | 1 | #### | .         | T | G | . | PA:C4BPA    | exonic    | NM_.      | syr C4BPA:  |
| ACa07 | 1 | #### | .         | G | A | . | PA:CR1L     | intronic  | NM_.      | .           |
| ACa07 | 1 | #### | .         | T | C | . | PA:PLXNA2   | intronic  | NM_.      | .           |
| ACa07 | 1 | #### | .         | C | G | . | PA:HSD11B1  | intronic  | NM_.      | .           |
| ACa07 | 1 | #### | .         | T | C | . | PA:RCOR3    | intronic  | NM_.      | .           |
| ACa07 | 1 | #### | rs9188348 | C | T | . | PA:TATDN3   | intronic  | NM_.      | .           |
| ACa07 | 1 | #### | .         | C | T | . | PA:FLVCR1   | exonic    | NM_.      | mi& FLVCR   |
| ACa07 | 1 | #### | .         | G | T | . | PA:RPS6KC1  | exonic    | NM_.      | mi& RPS6Kl  |
| ACa07 | 1 | #### | .         | A | G | . | PA:PTPN14   | intronic  | NM_.      | .           |
| ACa07 | 1 | #### | .         | G | A | . | PA:PTPN14   | intronic  | NM_.      | .           |
| ACa07 | 1 | #### | rs9106912 | T | C | . | PA:USH2A    | exonic    | NM_.      | mi& USH2A   |
| ACa07 | 1 | #### | .         | G | T | . | PA:USH2A    | intronic  | NM_.      | .           |
| ACa07 | 1 | #### | rs7564262 | C | T | . | PA:USH2A    | exonic    | NM_.      | mi& USH2A   |
| ACa07 | 1 | #### | rs1909372 | C | T | . | PA:ESRRG    | UTR3      | NM_NM_.   | .           |
| ACa07 | 1 | #### | .         | C | T | . | PA:SLC30A1  | (splicing | NM_NM_.   | .           |
| ACa07 | 1 | #### | .         | C | T | . | PA:IARS2    | exonic    | NM_.      | syr IARS2:l |
| ACa07 | 1 | #### | rs7799500 | C | T | . | PA:IARS2    | exonic    | NM_.      | mi& IARS2:l |
| ACa07 | 1 | #### | .         | C | A | . | PA: 2-Mar   | exonic    | NM_.      | mi& MARC2   |
| ACa07 | 1 | #### | .         | T | G | . | PA:DISP1    | exonic    | NM_.      | mi& DISP1:l |
| ACa07 | 1 | #### | .         | C | T | . | PA:NVL      | intronic  | NM_.      | .           |
| ACa07 | 1 | #### | .         | G | A | . | PA:TMEM63A  | intronic  | NM_.      | .           |
| ACa07 | 1 | #### | .         | G | A | . | PA:LEFTY2   | exonic    | NM_.      | mi& LEFTY2  |
| ACa07 | 1 | #### | rs9303868 | C | T | . | PA:.        | intergen  | NM_dist=. | .           |
| ACa07 | 1 | #### | .         | G | A | . | PA:ADCK3    | intronic  | NM_.      | .           |
| ACa07 | 1 | #### | .         | A | T | . | PA:OBSCN    | exonic    | NM_.      | mi& OBSCN   |
| ACa07 | 1 | #### | .         | G | A | . | PA:TRIM67   | exonic    | NM_.      | mi& TRIM67  |
| ACa07 | 1 | #### | .         | C | T | . | PA:KIAA1804 | intronic  | NM_.      | .           |

|       |   |      |           |   |   |   |             |            |           |     |         |
|-------|---|------|-----------|---|---|---|-------------|------------|-----------|-----|---------|
| ACa07 | 1 | #### | rs1006991 | C | T | . | PA:KCNK1    | exonic     | NM_.      | syr | KCNK1   |
| ACa07 | 1 | #### | rs3676265 | C | T | . | PA:RYS2     | intronic   | NM_.      | .   | .       |
| ACa07 | 1 | #### | .         | C | T | . | PA:PLD5     | intronic   | NM_.      | .   | .       |
| ACa07 | 1 | #### | .         | C | T | . | PA:AKT3     | splicing   | NM_NM_.   | .   | .       |
| ACa07 | 1 | #### | rs1000082 | G | A | . | PA:.        | intergen   | NM_dist=. | .   | .       |
| ACa07 | 1 | #### | rs1825931 | C | T | . | PA:ZNF496   | intronic   | NM_.      | .   | .       |
| ACa07 | 1 | #### | rs7580154 | C | T | . | PA:ZNF692   | exonic     | NM_.      | mis | ZNF692  |
| ACa07 | 2 | #### | rs3724090 | G | A | . | PA:TPO      | intronic   | NM_.      | .   | .       |
| ACa07 | 2 | #### | rs7778730 | G | A | . | PA:TSSC1    | intronic   | NM_.      | .   | .       |
| ACa07 | 2 | #### | .         | A | G | . | PA:TRAPPC1  | exonic     | NM_.      | mis | TRAPP   |
| ACa07 | 2 | #### | rs5690508 | G | A | . | PA:TRAPPC1  | exonic     | NM_.      | mis | TRAPP   |
| ACa07 | 2 | #### | .         | T | C | . | PA:.        | intergen   | NR_dist=. | .   | .       |
| ACa07 | 2 | #### | rs7490370 | G | A | . | PA:MBOAT2   | exonic     | NM_.      | mis | MBOAT   |
| ACa07 | 2 | #### | rs3691590 | C | T | . | PA:ADAM17   | exonic     | NM_.      | mis | ADAM1   |
| ACa07 | 2 | #### | rs9653906 | G | A | . | PA:PQLC3    | intronic   | NM_.      | .   | .       |
| ACa07 | 2 | #### | .         | C | T | . | PA:FAM49A   | intronic   | NM_.      | .   | .       |
| ACa07 | 2 | #### | rs3765736 | C | T | . | PA:FAM49A   | intronic   | NM_.      | .   | .       |
| ACa07 | 2 | #### | rs3680831 | C | T | . | PA:VSNL1    | exonic     | NM_.      | syr | VSNL1:  |
| ACa07 | 2 | #### | rs7556987 | C | T | . | PA:KCNS3    | exonic     | NM_.      | mis | KCNS3   |
| ACa07 | 2 | #### | .         | G | A | . | PA:KLHL29   | exonic     | NM_.      | mis | KLHL29  |
| ACa07 | 2 | #### | rs5650507 | G | A | . | PA:ITSN2    | intronic   | NM_.      | .   | .       |
| ACa07 | 2 | #### | rs7736455 | G | A | . | PA:NCOA1    | exonic     | NM_.      | syr | NCOA1   |
| ACa07 | 2 | #### | rs1479767 | G | A | . | PA:EMILIN1  | exonic     | NM_.      | mis | EMILIN  |
| ACa07 | 2 | #### | .         | G | A | . | PA:CAD      | exonic     | NM_.      | mis | CAD:NM  |
| ACa07 | 2 | #### | .         | A | T | . | PA:CAD      | exonic     | NM_.      | mis | CAD:NM  |
| ACa07 | 2 | #### | .         | G | A | . | PA:FND4     | intronic   | NM_.      | .   | .       |
| ACa07 | 2 | #### | .         | G | A | . | PA:ALK      | intronic   | NM_.      | .   | .       |
| ACa07 | 2 | #### | rs7664313 | G | A | . | PA:BIRC6    | exonic     | NM_.      | mis | BIRC6:l |
| ACa07 | 2 | #### | rs1047800 | G | A | . | PA:TTC27    | intronic   | NM_.      | .   | .       |
| ACa07 | 2 | #### | .         | A | G | . | PA:LINC0048 | ncRNA_NR_. | .         | .   | .       |
| ACa07 | 2 | #### | .         | C | T | . | PA:STRN     | exonic     | NM_.      | mis | STRN:M  |
| ACa07 | 2 | #### | rs7725290 | C | T | . | PA:SLC8A1   | intronic   | NM_.      | .   | .       |
| ACa07 | 2 | #### | .         | T | G | . | PA:LRPPRC   | intronic   | NM_.      | .   | .       |
| ACa07 | 2 | #### | .         | T | C | . | PA:PPP1R21  | UTR3       | NM_NM_.   | .   | .       |
| ACa07 | 2 | #### | .         | C | A | . | PA:STON1-G  | intronic   | NM_.      | .   | .       |
| ACa07 | 2 | #### | .         | C | T | . | PA:SPTBN1   | intronic   | NM_.      | .   | .       |
| ACa07 | 2 | #### | .         | C | A | . | PA:SPTBN1   | exonic     | NM_.      | mis | SPTBN   |
| ACa07 | 2 | #### | .         | T | C | . | PA:RTN4     | UTR5       | NM_NM_.   | .   | .       |
| ACa07 | 2 | #### | rs7787019 | T | C | . | PA:EFEMP1   | intronic   | NM_.      | .   | .       |
| ACa07 | 2 | #### | rs7608139 | C | T | . | PA:CCDC85A  | exonic     | NM_.      | syr | CCDC8   |
| ACa07 | 2 | #### | .         | T | C | . | PA:BCL11A   | UTR3       | NM_NM_.   | .   | .       |
| ACa07 | 2 | #### | .         | C | T | . | PA:WDPCP    | intronic   | NM_.      | .   | .       |
| ACa07 | 2 | #### | .         | A | T | . | PA:UGP2     | intronic   | NM_.      | .   | .       |
| ACa07 | 2 | #### | .         | A | C | . | PA:PELI1    | UTR3       | NM_NM_.   | .   | .       |
| ACa07 | 2 | #### | .         | C | T | . | PA:ARHGAP2  | exonic     | NM_.      | mis | ARHGA   |
| ACa07 | 2 | #### | .         | A | G | . | PA:ANTXR1   | intronic   | NM_.      | .   | .       |
| ACa07 | 2 | #### | .         | C | A | . | PA:ADD2     | intronic   | NM_.      | .   | .       |
| ACa07 | 2 | #### | .         | C | T | . | PA:NAGK     | intronic   | NM_.      | .   | .       |
| ACa07 | 2 | #### | .         | C | A | . | PA:DYSF     | intronic   | NM_.      | .   | .       |
| ACa07 | 2 | #### | rs7670256 | C | T | . | PA:EVA1A    | exonic     | NM_.      | syr | EVA1A:  |
| ACa07 | 2 | #### | .         | A | G | . | PA:DNAH6    | exonic     | NM_.      | mis | DNAH6   |
| ACa07 | 2 | #### | rs1883943 | G | A | . | PA:KCMF1    | intronic   | NM_.      | .   | .       |
| ACa07 | 2 | #### | .         | G | A | . | PA:RETSAT   | intronic   | NM_.      | .   | .       |
| ACa07 | 2 | #### | .         | G | T | . | PA:GGCX     | exonic     | NM_.      | syr | GGCX:l  |

|       |   |      |           |   |   |   |             |           |           |     |         |
|-------|---|------|-----------|---|---|---|-------------|-----------|-----------|-----|---------|
| ACa07 | 2 | #### | .         | T | C | . | PA:VAMP5    | intronic  | NM_       | .   | .       |
| ACa07 | 2 | #### | .         | C | T | . | PA:RGPD2,R  | intronic  | NM_       | .   | .       |
| ACa07 | 2 | #### | .         | A | C | . | PA:.        | intergen  | NR_dist=  | .   | .       |
| ACa07 | 2 | #### | rs1915368 | G | A | . | PA:.        | intergen  | NR_dist=  | .   | .       |
| ACa07 | 2 | #### | rs7778874 | G | A | . | PA:.        | intergen  | NR_dist=  | .   | .       |
| ACa07 | 2 | #### | rs2923588 | G | A | . | PA:.        | intergen  | NR_dist=  | .   | .       |
| ACa07 | 2 | #### | rs3763447 | C | T | . | PA:.        | intergen  | NR_dist=  | .   | .       |
| ACa07 | 2 | #### | .         | T | G | . | PA:.        | intergen  | NR_dist=  | .   | .       |
| ACa07 | 2 | #### | .         | T | C | . | PA:.        | intergen  | NR_dist=  | .   | .       |
| ACa07 | 2 | #### | rs8689209 | G | A | . | PA:.        | intergen  | NOI dist= | .   | .       |
| ACa07 | 2 | #### | rs3759446 | C | A | . | PA:.        | intergen  | NOI dist= | .   | .       |
| ACa07 | 2 | #### | rs1210521 | G | A | . | PA:.        | intergen  | NOI dist= | .   | .       |
| ACa07 | 2 | #### | rs2931782 | G | A | . | PA:ANKRD20  | ncRNA_NR_ | .         | .   |         |
| ACa07 | 2 | #### | .         | A | G | . | PA:TRIM43B  | intronic  | NM_       | .   | .       |
| ACa07 | 2 | #### | rs7784367 | C | T | . | PA:ASTL     | exonic    | NM_       | syr | ASTL:N  |
| ACa07 | 2 | #### | .         | C | T | . | PA:SNRNP20  | exonic    | NM_       | syr | SNRNP   |
| ACa07 | 2 | #### | rs5704884 | G | A | . | PA:FER1L5   | intronic  | NM_       | .   | .       |
| ACa07 | 2 | #### | .         | T | C | . | PA:CNNM3    | intronic  | NM_       | .   | .       |
| ACa07 | 2 | #### | rs5571075 | G | A | . | PA:ANKRD36  | exonic    | NM_       | syr | ANKRD   |
| ACa07 | 2 | #### | .         | T | C | . | PA:ANKRD36  | intronic  | NM_       | .   | .       |
| ACa07 | 2 | #### | .         | C | A | . | PA:TMEM131  | exonic    | NM_       | syr | TMEM1   |
| ACa07 | 2 | #### | rs7682782 | C | T | . | PA:AFF3     | exonic    | NM_       | mis | AFF3:N  |
| ACa07 | 2 | #### | .         | G | A | . | PA:IL18R1   | exonic    | NM_       | mis | IL18R1: |
| ACa07 | 2 | #### | rs7516119 | G | A | . | PA:TGFBRAF  | exonic    | NM_       | syr | TGFBR   |
| ACa07 | 2 | #### | rs2018112 | C | T | . | PA:RGPD3    | exonic    | NM_       | mis | RGPD3   |
| ACa07 | 2 | #### | rs7589510 | C | T | . | PA:BUB1     | exonic    | NM_       | mis | BUB1:N  |
| ACa07 | 2 | #### | .         | G | A | . | PA:.        | intergen  | NM_dist=  | .   | .       |
| ACa07 | 2 | #### | .         | A | G | . | PA:.        | downstr   | NM_       | .   | .       |
| ACa07 | 2 | #### | .         | A | G | . | PA:IL36A    | exonic    | NM_       | mis | IL36A:N |
| ACa07 | 2 | #### | .         | G | A | . | PA:.        | intergen  | NM_dist=  | .   | .       |
| ACa07 | 2 | #### | .         | T | C | . | PA:DPP10    | intronic  | NM_       | .   | .       |
| ACa07 | 2 | #### | rs7642264 | C | T | . | PA:RALB     | exonic    | NM_       | syr | RALB:N  |
| ACa07 | 2 | #### | .         | T | A | . | PA:PROC     | intronic  | NM_       | .   | .       |
| ACa07 | 2 | #### | .         | G | A | . | PA:MYO7B    | intronic  | NM_       | .   | .       |
| ACa07 | 2 | #### | rs7817298 | C | T | . | PA:SMPD4    | intronic  | NM_       | .   | .       |
| ACa07 | 2 | #### | rs1340756 | G | C | . | PA:.        | intergen  | NM_dist=  | .   | .       |
| ACa07 | 2 | #### | rs1820004 | C | T | . | PA:.        | intergen  | NM_dist=  | .   | .       |
| ACa07 | 2 | #### | .         | A | G | . | PA:GPR39    | intronic  | NM_       | .   | .       |
| ACa07 | 2 | #### | .         | C | T | . | PA:MIR7853  | ncRNA_NR_ | .         | .   |         |
| ACa07 | 2 | #### | .         | C | A | . | PA:LRP1B    | intronic  | NM_       | .   | .       |
| ACa07 | 2 | #### | .         | G | A | . | PA:NEB      | exonic    | NM_       | mis | NEB:NM  |
| ACa07 | 2 | #### | .         | G | T | . | PA:STAM2    | intronic  | NM_       | .   | .       |
| ACa07 | 2 | #### | .         | G | A | . | PA:FMNL2    | intronic  | NM_       | .   | .       |
| ACa07 | 2 | #### | rs1012824 | C | T | . | PA:PRPF40A  | intronic  | NM_       | .   | .       |
| ACa07 | 2 | #### | rs9859742 | A | C | . | PA:ARL6IP6  | intronic  | NM_       | .   | .       |
| ACa07 | 2 | #### | rs2003571 | C | T | . | PA:TANC1    | exonic    | NM_       | mis | TANC1:  |
| ACa07 | 2 | #### | rs3721419 | G | A | . | PA:SLC4A10  | exonic    | NM_       | mis | SLC4A'  |
| ACa07 | 2 | #### | .         | G | T | . | PA:DPP4     | intronic  | NM_       | .   | .       |
| ACa07 | 2 | #### | rs1029714 | C | T | . | PA:DPP4     | intronic  | NM_       | .   | .       |
| ACa07 | 2 | #### | .         | G | A | . | PA:SCN3A    | intronic  | NM_       | .   | .       |
| ACa07 | 2 | #### | .         | T | G | . | PA:ABCB11   | intronic  | NM_       | .   | .       |
| ACa07 | 2 | #### | .         | G | T | . | PA:BBS5     | UTR5      | NM_NM_    | .   | .       |
| ACa07 | 2 | #### | .         | A | G | . | PA:LOC10192 | ncRNA_NR_ | .         | .   |         |
| ACa07 | 2 | #### | rs9215367 | C | T | . | PA:GORASP2  | exonic    | NM_       | sto | GORAS   |



|       |   |      |           |   |   |   |             |           |          |     |         |
|-------|---|------|-----------|---|---|---|-------------|-----------|----------|-----|---------|
| ACa07 | 2 | #### | .         | T | A | . | PA:DYNC1I2  | intronic  | NM_      | .   | .       |
| ACa07 | 2 | #### | rs9638533 | G | A | . | PA:RAPGEF4  | intronic  | NM_      | .   | .       |
| ACa07 | 2 | #### | .         | T | C | . | PA:WIPF1    | intronic  | NM_      | .   | .       |
| ACa07 | 2 | #### | .         | T | C | . | PA:CHRNA1   | intronic  | NM_      | .   | .       |
| ACa07 | 2 | #### | .         | G | A | . | PA:.        | intergen  | NM_dist= | .   | .       |
| ACa07 | 2 | #### | .         | A | T | . | PA:AGPS     | intronic  | NM_      | .   | .       |
| ACa07 | 2 | #### | .         | G | A | . | PA:PDE11A   | intronic  | NM_      | .   | .       |
| ACa07 | 2 | #### | rs9603080 | T | A | . | PA:TTN      | intronic  | NM_      | .   | .       |
| ACa07 | 2 | #### | rs3772721 | C | T | . | PA:DNAJC10  | exonic    | NM_      | mis | DNAJC   |
| ACa07 | 2 | #### | rs3766275 | T | C | . | PA:FSIP2    | exonic    | NM_      | mis | FSIP2:1 |
| ACa07 | 2 | #### | .         | A | G | . | PA:FSIP2    | exonic    | NM_      | mis | FSIP2:1 |
| ACa07 | 2 | #### | .         | T | C | . | PA:ITGAV    | intronic  | NM_      | .   | .       |
| ACa07 | 2 | #### | rs3768239 | G | A | . | PA:COL5A2   | intronic  | NM_      | .   | .       |
| ACa07 | 2 | #### | rs7715235 | C | T | . | PA:WDR75    | intronic  | NM_      | .   | .       |
| ACa07 | 2 | #### | .         | G | A | . | PA:STAT1    | intronic  | NM_      | .   | .       |
| ACa07 | 2 | #### | .         | G | A | . | PA:SDPR     | exonic    | NM_      | mis | SDPR:1  |
| ACa07 | 2 | #### | .         | T | A | . | PA:STK17B   | exonic    | NM_      | mis | STK17B  |
| ACa07 | 2 | #### | .         | C | T | . | PA:KCTD18   | exonic    | NM_      | mis | KCTD18  |
| ACa07 | 2 | #### | .         | T | C | . | PA:CLK1     | exonic    | NM_      | mis | CLK1:N  |
| ACa07 | 2 | #### | rs5481928 | G | A | . | PA:KIAA2012 | exonic    | NM_      | syr | KIAA20  |
| ACa07 | 2 | #### | rs1901033 | T | A | . | PA:NBEAL1   | intronic  | NM_      | .   | .       |
| ACa07 | 2 | #### | rs7778048 | A | G | . | PA:RAPH1    | exonic    | NM_      | syr | RAPH1   |
| ACa07 | 2 | #### | rs1477917 | G | A | . | PA:EEF1B2   | exonic    | NM_      | syr | EEF1B2  |
| ACa07 | 2 | #### | rs5379398 | G | A | . | PA:ADAM23   | intronic  | NM_      | .   | .       |
| ACa07 | 2 | #### | .         | G | C | . | PA:CRYGD    | exonic    | NM_      | mis | CRYGD   |
| ACa07 | 2 | #### | .         | C | A | . | PA:.        | intergen  | NM_dist= | .   | .       |
| ACa07 | 2 | #### | .         | G | A | . | PA:UNC80    | exonic    | NM_      | mis | UNC80:  |
| ACa07 | 2 | #### | .         | C | T | . | PA:UNC80    | intronic  | NM_      | .   | .       |
| ACa07 | 2 | #### | .         | A | G | . | PA:UNC80    | intronic  | NM_      | .   | .       |
| ACa07 | 2 | #### | .         | T | C | . | PA:CPS1     | intronic  | NM_      | .   | .       |
| ACa07 | 2 | #### | .         | G | T | . | PA:TNS1     | intronic  | NM_      | .   | .       |
| ACa07 | 2 | #### | .         | A | T | . | PA:.        | intergen  | NM_dist= | .   | .       |
| ACa07 | 2 | #### | .         | C | A | . | PA:CATIP-AS | ncRNA_NR_ | .        | .   | .       |
| ACa07 | 2 | #### | .         | G | T | . | PA:SLC11A1  | splicing  | NM_NM_   | .   | .       |
| ACa07 | 2 | #### | rs5756405 | G | A | . | PA:VIL1     | intronic  | NM_      | .   | .       |
| ACa07 | 2 | #### | .         | G | T | . | PA:TLL4     | intronic  | NM_      | .   | .       |
| ACa07 | 2 | #### | rs3732211 | G | A | . | PA:CCDC108  | intronic  | NM_      | .   | .       |
| ACa07 | 2 | #### | .         | G | A | . | PA:DNAJB2   | exonic    | NM_      | syr | DNAJB2  |
| ACa07 | 2 | #### | rs7469670 | C | T | . | PA:DES      | intronic  | NM_      | .   | .       |
| ACa07 | 2 | #### | rs5290584 | C | T | . | PA:SPEG     | splicing  | NM_NM_   | .   | .       |
| ACa07 | 2 | #### | .         | T | A | . | PA:EPHA4    | exonic    | NM_      | mis | EPHA4:  |
| ACa07 | 2 | #### | .         | C | T | . | PA:IRS1     | exonic    | NM_      | syr | IRS1:NI |
| ACa07 | 2 | #### | .         | A | T | . | PA:LOC65484 | ncRNA_NR_ | .        | .   | .       |
| ACa07 | 2 | #### | rs499449  | C | T | . | PA:FBXO36   | intronic  | NM_      | .   | .       |
| ACa07 | 2 | #### | rs7533248 | G | A | . | PA:NMUR1    | exonic    | NM_      | mis | NMUR1   |
| ACa07 | 2 | #### | .         | C | A | . | PA:DIS3L2   | splicing  | NM_NM_   | .   | .       |
| ACa07 | 2 | #### | .         | G | T | . | PA:DIS3L2   | intronic  | NM_      | .   | .       |
| ACa07 | 2 | #### | .         | G | A | . | PA:ALPPL2   | intronic  | NM_      | .   | .       |
| ACa07 | 2 | #### | rs2020267 | G | A | . | PA:INPP5D   | exonic    | NM_      | unl | UNKNC   |
| ACa07 | 2 | #### | rs1053770 | C | T | . | PA:MROH2A   | intronic  | NM_      | .   | .       |
| ACa07 | 2 | #### | .         | C | T | . | PA:MROH2A   | exonic    | NM_      | syr | MROH2   |
| ACa07 | 2 | #### | .         | C | T | . | PA:IQCA1    | intronic  | NM_      | .   | .       |
| ACa07 | 2 | #### | rs7483373 | C | T | . | PA:PER2     | exonic    | NM_      | mis | PER2:N  |
| ACa07 | 2 | #### | .         | C | T | . | PA:LOC15093 | ncRNA_NR_ | .        | .   | .       |

|       |   |      |           |   |   |   |             |            |           |             |
|-------|---|------|-----------|---|---|---|-------------|------------|-----------|-------------|
| ACa07 | 2 | #### | rs3776284 | G | A | . | PA:KIF1A    | exonic     | NM_.      | syr KIF1A:M |
| ACa07 | 2 | #### | rs1500761 | C | T | . | PA:KIF1A    | intronic   | NM_.      | .           |
| ACa07 | 2 | #### | .         | G | T | . | PA:.        | upstream   | NM_.      | .           |
| ACa07 | 2 | #### | .         | C | T | . | PA:.        | intergen   | NR_dist=. | .           |
| ACa07 | 2 | #### | .         | G | A | . | PA:SNED1    | intronic   | NM_.      | .           |
| ACa07 | 3 | #### | rs3731564 | C | T | . | PA:CHL1     | exonic     | NM_.      | syr CHL1:N  |
| ACa07 | 3 | #### | rs5694312 | C | T | . | PA:CNTN6    | intronic   | NM_.      | .           |
| ACa07 | 3 | #### | .         | C | T | . | PA:LMCD1    | intronic   | NM_.      | .           |
| ACa07 | 3 | #### | .         | G | A | . | PA:LHFPL4   | UTR5       | NM_NM_.   | .           |
| ACa07 | 3 | #### | rs7502023 | C | T | . | PA:.        | intergen   | NM_dist=. | .           |
| ACa07 | 3 | #### | .         | T | C | . | PA:IL17RC   | intronic   | NM_.      | .           |
| ACa07 | 3 | #### | rs7567892 | C | T | . | PA:CRELD1   | exonic     | NM_.      | mis CRELD   |
| ACa07 | 3 | #### | .         | C | T | . | PA:FANCD2   | intronic   | NM_.      | .           |
| ACa07 | 3 | #### | .         | C | T | . | PA:SLC6A11  | exonic     | NM_.      | mis SLC6A'  |
| ACa07 | 3 | #### | .         | G | A | . | PA:TAMM41   | intronic   | NM_.      | .           |
| ACa07 | 3 | #### | .         | G | A | . | PA:.        | intergen   | NM_dist=. | .           |
| ACa07 | 3 | #### | rs9925095 | C | T | . | PA:TSEN2    | intronic   | NM_.      | .           |
| ACa07 | 3 | #### | .         | G | T | . | PA:RAF1     | intronic   | NM_.      | .           |
| ACa07 | 3 | #### | .         | C | A | . | PA:IQSEC1   | intronic   | NM_.      | .           |
| ACa07 | 3 | #### | .         | T | A | . | PA:CAPN7    | exonic     | NM_.      | mis CAPN7   |
| ACa07 | 3 | #### | .         | T | C | . | PA:TBC1D5   | intronic   | NM_.      | .           |
| ACa07 | 3 | #### | .         | G | T | . | PA:KCNH8    | intronic   | NM_.      | .           |
| ACa07 | 3 | #### | .         | G | A | . | PA:NR1D2    | exonic     | NM_.      | syr NR1D2:  |
| ACa07 | 3 | #### | .         | C | T | . | PA:TOP2B    | intronic   | NM_.      | .           |
| ACa07 | 3 | #### | .         | A | G | . | PA:.        | intergen   | NM_dist=. | .           |
| ACa07 | 3 | #### | rs8972401 | A | G | . | PA:SLC4A7   | intronic   | NM_.      | .           |
| ACa07 | 3 | #### | rs1124655 | G | A | . | PA:TGFBR2   | exonic     | NM_.      | mis TGFBR   |
| ACa07 | 3 | #### | .         | C | T | . | PA:.        | intergen   | NM_dist=. | .           |
| ACa07 | 3 | #### | rs7802104 | C | T | . | PA:STT3B    | exonic     | NM_.      | unl UNKNC   |
| ACa07 | 3 | #### | .         | G | T | . | PA:STAC     | intronic   | NM_.      | .           |
| ACa07 | 3 | #### | rs5407838 | G | A | . | PA:DCLK3    | exonic     | NM_.      | mis DCLK3:  |
| ACa07 | 3 | #### | rs5599017 | G | A | . | PA:MLH1     | intronic   | NM_.      | .           |
| ACa07 | 3 | #### | .         | T | C | . | PA:GOLGA4   | exonic     | NM_.      | syr GOLGA   |
| ACa07 | 3 | #### | rs3732183 | G | A | . | PA:DLEC1    | intronic   | NM_.      | .           |
| ACa07 | 3 | #### | .         | C | T | . | PA:EXOG     | intronic   | NM_.      | .           |
| ACa07 | 3 | #### | rs7485706 | G | A | . | PA:SCN10A   | exonic     | NM_.      | syr SCN10,  |
| ACa07 | 3 | #### | .         | G | A | . | PA:ZKSCAN7  | intronic   | NM_.      | .           |
| ACa07 | 3 | #### | rs7745693 | G | A | . | PA:CCR9     | exonic     | NM_.      | mis CCR9:M  |
| ACa07 | 3 | #### | .         | G | A | . | PA:.        | upstream   | NM_.      | .           |
| ACa07 | 3 | #### | .         | G | A | . | PA:SETD2    | intronic   | NM_.      | .           |
| ACa07 | 3 | #### | rs7512571 | C | T | . | PA:CCDC51   | exonic     | NM_.      | mis CCDC5   |
| ACa07 | 3 | #### | rs5304720 | G | A | . | PA:COL7A1   | intronic   | NM_.      | .           |
| ACa07 | 3 | #### | rs3713830 | C | T | . | PA:NCKIPSD  | exonic     | NM_.      | mis NCKIP9  |
| ACa07 | 3 | #### | .         | C | T | . | PA:WDR6     | exonic     | NM_.      | mis WDR6:l  |
| ACa07 | 3 | #### | rs2001906 | C | T | . | PA:QRICH1   | exonic     | NM_.      | syr QRICH'  |
| ACa07 | 3 | #### | .         | G | A | . | PA:USP4     | exonic     | NM_.      | mis USP4:N  |
| ACa07 | 3 | #### | .         | C | T | . | PA:BSN      | exonic     | NM_.      | sto BSN:NM  |
| ACa07 | 3 | #### | .         | G | T | . | PA:CAMKV    | intronic   | NM_.      | .           |
| ACa07 | 3 | #### | rs7596904 | C | T | . | PA:CACNA2C  | exonic     | NM_.      | unl UNKNC   |
| ACa07 | 3 | #### | rs1821535 | G | A | . | PA:IQCF5-AS | ncRNA_NR_. | .         | .           |
| ACa07 | 3 | #### | .         | A | G | . | PA:PCBP4    | intronic   | NM_.      | .           |
| ACa07 | 3 | #### | rs7780907 | G | A | . | PA:PCBP4    | exonic     | NM_.      | mis PCBP4:  |
| ACa07 | 3 | #### | .         | A | G | . | PA:ALAS1    | splicing   | NM_NM_.   | .           |
| ACa07 | 3 | #### | .         | G | A | . | PA:DNAH1    | intronic   | NM_.      | .           |

|       |   |      |           |   |   |   |             |            |           |     |         |
|-------|---|------|-----------|---|---|---|-------------|------------|-----------|-----|---------|
| ACa07 | 3 | #### | .         | A | G | . | PA:DNAH1    | intronic   | NM_.      | .   | .       |
| ACa07 | 3 | #### | .         | C | T | . | PA:DNAH1    | intronic   | NM_.      | .   | .       |
| ACa07 | 3 | #### | rs9624625 | C | T | . | PA:SEMA3G   | intronic   | NM_.      | .   | .       |
| ACa07 | 3 | #### | .         | A | T | . | PA:PBRM1    | intronic   | NM_.      | .   | .       |
| ACa07 | 3 | #### | .         | T | G | . | PA:PBRM1    | exonic     | NM_.      | mi  | PBRM1   |
| ACa07 | 3 | #### | .         | C | T | . | PA:CACNA1C  | exonic     | NM_.      | mi  | CACNA   |
| ACa07 | 3 | #### | rs2000990 | C | T | . | PA:ACTR8    | intronic   | NM_.      | .   | .       |
| ACa07 | 3 | #### | rs9858893 | T | C | . | PA:CACNA2C  | intronic   | NM_.      | .   | .       |
| ACa07 | 3 | #### | rs1042360 | T | C | . | PA:CACNA2C  | intronic   | NM_.      | .   | .       |
| ACa07 | 3 | #### | .         | G | A | . | PA:IL17RD   | intronic   | NM_.      | .   | .       |
| ACa07 | 3 | #### | .         | C | A | . | PA:APPL1    | intronic   | NM_.      | .   | .       |
| ACa07 | 3 | #### | .         | G | T | . | PA:DENND6A  | UTR3       | NM_NM_.   | .   | .       |
| ACa07 | 3 | #### | .         | G | T | . | PA:PXK      | intronic   | NM_.      | .   | .       |
| ACa07 | 3 | #### | rs7458693 | C | T | . | PA:ADAMTS9  | exonic     | NM_.      | syr | ADAMT   |
| ACa07 | 3 | #### | .         | A | G | . | PA:LMOD3    | exonic     | NM_.      | mi  | LMOD3   |
| ACa07 | 3 | #### | .         | C | T | . | PA:MITF     | exonic     | NM_.      | mi  | MITF:N  |
| ACa07 | 3 | #### | rs7794528 | C | T | . | PA:FAM86DP  | ncRNA_NR_. | .         | .   | .       |
| ACa07 | 3 | #### | .         | G | A | . | PA:MINA     | exonic     | NM_.      | mi  | MINA:N  |
| ACa07 | 3 | #### | .         | A | G | . | PA:.        | intergen   | NR_dist=. | .   | .       |
| ACa07 | 3 | #### | .         | G | T | . | PA:KIAA1524 | intronic   | NM_.      | .   | .       |
| ACa07 | 3 | #### | .         | C | T | . | PA:MORC1    | intronic   | NM_.      | .   | .       |
| ACa07 | 3 | #### | .         | G | T | . | PA:CFAP44   | exonic     | NM_.      | syr | CFAP44  |
| ACa07 | 3 | #### | .         | A | C | . | PA:TMEM39A  | splicing   | NM_NM_.   | .   | .       |
| ACa07 | 3 | #### | .         | C | A | . | PA:TMEM39A  | intronic   | NM_.      | .   | .       |
| ACa07 | 3 | #### | rs3684939 | G | A | . | PA:STXBP5L  | exonic     | NM_.      | mi  | STXBP5L |
| ACa07 | 3 | #### | rs1001693 | G | A | . | PA:SEMA5B   | intronic   | NM_.      | .   | .       |
| ACa07 | 3 | #### | rs1465223 | G | A | . | PA:.        | intergen   | NM_dist=. | .   | .       |
| ACa07 | 3 | #### | .         | C | A | . | PA:UROC1    | intronic   | NM_.      | .   | .       |
| ACa07 | 3 | #### | rs5528272 | G | A | . | PA:PLXNA1   | exonic     | NM_.      | syr | PLXNA1  |
| ACa07 | 3 | #### | rs7511092 | G | A | . | PA:TPRA1    | exonic     | NM_.      | syr | TPRA1   |
| ACa07 | 3 | #### | .         | A | G | . | PA:.        | intergen   | NR_dist=. | .   | .       |
| ACa07 | 3 | #### | rs5631647 | C | T | . | PA:LOC65371 | ncRNA_NR_. | .         | .   | .       |
| ACa07 | 3 | #### | .         | A | G | . | PA:RPL32P3  | ncRNA_NR_. | .         | .   | .       |
| ACa07 | 3 | #### | .         | G | A | . | PA:NUDT16   | exonic     | NM_.      | mi  | NUDT16  |
| ACa07 | 3 | #### | .         | C | A | . | PA:ACPP     | UTR3       | NM_NM_.   | .   | .       |
| ACa07 | 3 | #### | .         | G | A | . | PA:PRR23A   | exonic     | NM_.      | mi  | PRR23A  |
| ACa07 | 3 | #### | .         | C | T | . | PA:PRR23C   | exonic     | NM_.      | syr | PRR23C  |
| ACa07 | 3 | #### | rs1408440 | C | T | . | PA:CLSTN2   | exonic     | NM_.      | syr | CLSTN2  |
| ACa07 | 3 | #### | .         | G | A | . | PA:RASA2    | exonic     | NM_.      | syr | RASA2   |
| ACa07 | 3 | #### | .         | C | T | . | PA:TFDP2    | intronic   | NM_.      | .   | .       |
| ACa07 | 3 | #### | rs7685217 | A | T | . | PA:ATR      | intronic   | NM_.      | .   | .       |
| ACa07 | 3 | #### | rs7705095 | C | T | . | PA:PCOLCE2  | exonic     | NM_.      | mi  | PCOLCE2 |
| ACa07 | 3 | #### | .         | G | A | . | PA:.        | intergen   | NM_dist=. | .   | .       |
| ACa07 | 3 | #### | .         | C | T | . | PA:.        | intergen   | NR_dist=. | .   | .       |
| ACa07 | 3 | #### | rs7605662 | C | T | . | PA:EIF2A    | exonic     | NM_.      | syr | EIF2A   |
| ACa07 | 3 | #### | .         | C | A | . | PA:GFM1     | intronic   | NM_.      | .   | .       |
| ACa07 | 3 | #### | .         | G | A | . | PA:MIR16-2  | ncRNA_NR_. | .         | .   | .       |
| ACa07 | 3 | #### | .         | G | A | . | PA:.        | intergen   | NM_dist=. | .   | .       |
| ACa07 | 3 | #### | .         | G | C | . | PA:.        | intergen   | NM_dist=. | .   | .       |
| ACa07 | 3 | #### | rs5388049 | C | T | . | PA:SKIL     | exonic     | NM_.      | mi  | SKIL:NI |
| ACa07 | 3 | #### | rs9368630 | G | A | . | PA:.        | intergen   | NM_dist=. | .   | .       |
| ACa07 | 3 | #### | .         | G | T | . | PA:KCNMB3   | UTR5       | NM_NM_.   | .   | .       |
| ACa07 | 3 | #### | rs7652687 | C | T | . | PA:USP13    | exonic     | NM_.      | syr | USP13   |
| ACa07 | 3 | #### | rs5714458 | C | T | . | PA:LOC10192 | ncRNA_NR_. | .         | .   | .       |

|       |   |      |           |   |   |   |            |            |           |     |        |
|-------|---|------|-----------|---|---|---|------------|------------|-----------|-----|--------|
| ACa07 | 3 | #### | .         | T | G | . | PA:MCCC1   | exonic     | NM_.      | mis | MCCC1  |
| ACa07 | 3 | #### | .         | C | T | . | PA:KLHL6   | exonic     | NM_.      | mis | KLHL6: |
| ACa07 | 3 | #### | rs9015268 | C | T | . | PA:HTR3D   | intronic   | NM_.      | .   | .      |
| ACa07 | 3 | #### | .         | T | C | . | PA:VWA5B2  | intronic   | NM_.      | .   | .      |
| ACa07 | 3 | #### | rs3748943 | G | A | . | PA:ECE2    | exonic     | NM_.      | mis | ECE2:N |
| ACa07 | 3 | #### | .         | T | A | . | PA:SST     | intronic   | NM_.      | .   | .      |
| ACa07 | 3 | #### | rs7531929 | C | T | . | PA:LPP     | exonic     | NM_.      | syr | LPP:NM |
| ACa07 | 3 | #### | rs7777314 | G | A | . | PA:TMEM44  | intronic   | NM_.      | .   | .      |
| ACa07 | 3 | #### | .         | C | T | . | PA:.       | intergen   | NM_dist=. | .   | .      |
| ACa07 | 3 | #### | .         | C | T | . | PA:.       | intergen   | NM_dist=. | .   | .      |
| ACa07 | 3 | #### | .         | C | T | . | PA:MUC4    | intronic   | NM_.      | .   | .      |
| ACa07 | 3 | #### | .         | C | T | . | PA:.       | intergen   | NM_dist=. | .   | .      |
| ACa07 | 3 | #### | rs8866852 | G | A | . | PA:NRROS   | intronic   | NM_.      | .   | .      |
| ACa07 | 3 | #### | rs7637750 | A | G | . | PA:.       | intergen   | NR_dist=. | .   | .      |
| ACa07 | 4 | #### | .         | G | T | . | PA:ABCA11P | ncRNA_NR_. | .         | .   | .      |
| ACa07 | 4 | #### | rs7620115 | G | A | . | PA:TMEM175 | exonic     | NM_.      | unf | UNKNC  |
| ACa07 | 4 | #### | .         | C | A | . | PA:CTBP1   | intronic   | NM_.      | .   | .      |
| ACa07 | 4 | #### | rs9125004 | C | T | . | PA:FAM53A  | intronic   | NM_.      | .   | .      |
| ACa07 | 4 | #### | .         | C | T | . | PA:TACC3   | intronic   | NM_.      | .   | .      |
| ACa07 | 4 | #### | .         | G | A | . | PA:LETM1   | intronic   | NM_.      | .   | .      |
| ACa07 | 4 | #### | rs5508099 | G | A | . | PA:WHSC1   | intronic   | NM_.      | .   | .      |
| ACa07 | 4 | #### | .         | T | C | . | PA:MXD4    | intronic   | NM_.      | .   | .      |
| ACa07 | 4 | #### | .         | G | A | . | PA:DOK7    | intronic   | NM_.      | .   | .      |
| ACa07 | 4 | #### | rs9333127 | G | A | . | PA:.       | intronic   | NM_.      | .   | .      |
| ACa07 | 4 | #### | .         | C | T | . | PA:ADRA2C  | exonic     | NM_.      | sto | ADRA2  |
| ACa07 | 4 | #### | rs5603533 | C | T | . | PA:WFS1    | exonic     | NM_.      | syr | WFS1:f |
| ACa07 | 4 | #### | .         | G | A | . | PA:PPP2R2C | intronic   | NM_.      | .   | .      |
| ACa07 | 4 | #### | .         | G | A | . | PA:SORCS2  | intronic   | NM_.      | .   | .      |
| ACa07 | 4 | #### | rs3763511 | G | A | . | PA:AFAP1   | exonic     | NM_.      | mis | AFAP1: |
| ACa07 | 4 | #### | rs2006520 | C | T | . | PA:ABLIM2  | intronic   | NM_.      | .   | .      |
| ACa07 | 4 | #### | rs7521101 | C | T | . | PA:SH3TC1  | exonic     | NM_.      | syr | SH3TC  |
| ACa07 | 4 | #### | rs7804064 | G | A | . | PA:ZNF518B | exonic     | NM_.      | mis | ZNF518 |
| ACa07 | 4 | #### | .         | C | A | . | PA:BOD1L1  | exonic     | NM_.      | mis | BOD1L  |
| ACa07 | 4 | #### | .         | G | A | . | PA:CC2D2A  | exonic     | NM_.      | mis | CC2D2  |
| ACa07 | 4 | #### | .         | A | T | . | PA:PACRGL  | intronic   | NM_.      | .   | .      |
| ACa07 | 4 | #### | .         | T | C | . | PA:CCDC149 | exonic     | NM_.      | mis | CCDC1  |
| ACa07 | 4 | #### | rs1420745 | A | G | . | PA:.       | intergen   | NR_dist=. | .   | .      |
| ACa07 | 4 | #### | rs5344165 | C | T | . | PA:UBE2K   | intronic   | NM_.      | .   | .      |
| ACa07 | 4 | #### | .         | C | T | . | PA:UBE2K   | intronic   | NM_.      | .   | .      |
| ACa07 | 4 | #### | .         | G | T | . | PA:.       | intergen   | NM_dist=. | .   | .      |
| ACa07 | 4 | #### | rs7759148 | G | A | . | PA:RHOH    | exonic     | NM_.      | mis | RHOH:l |
| ACa07 | 4 | #### | .         | A | T | . | PA:NSUN7   | exonic     | NM_.      | mis | NSUN7  |
| ACa07 | 4 | #### | rs2856467 | C | T | . | PA:GABRB1  | intronic   | NM_.      | .   | .      |
| ACa07 | 4 | #### | rs1451863 | C | T | . | PA:.       | intergen   | NM_dist=. | .   | .      |
| ACa07 | 4 | #### | rs5941177 | C | T | . | PA:.       | intergen   | NM_dist=. | .   | .      |
| ACa07 | 4 | #### | .         | C | T | . | PA:LRRRC66 | exonic     | NM_.      | mis | LRRRC6 |
| ACa07 | 4 | #### | .         | C | T | . | PA:DANCR   | ncRNA_NR_. | .         | .   | .      |
| ACa07 | 4 | #### | .         | G | C | . | PA:EXOC1   | intronic   | NM_.      | .   | .      |
| ACa07 | 4 | #### | .         | C | A | . | PA:THEGL   | intronic   | NM_.      | .   | .      |
| ACa07 | 4 | #### | .         | G | A | . | PA:TMPRSS1 | intronic   | NM_.      | .   | .      |
| ACa07 | 4 | #### | .         | C | T | . | PA:UGT2B4  | exonic     | NM_.      | sto | UGT2B  |
| ACa07 | 4 | #### | .         | A | T | . | PA:CSN1S1  | splicing   | NM_NM_.   | .   | .      |
| ACa07 | 4 | #### | rs7619680 | C | T | . | PA:SLC4A4  | intronic   | NM_.      | .   | .      |
| ACa07 | 4 | #### | .         | C | T | . | PA:ADAMTS3 | splicing   | NM_NM_.   | .   | .      |

|       |   |      |           |   |   |   |              |            |           |     |         |
|-------|---|------|-----------|---|---|---|--------------|------------|-----------|-----|---------|
| ACa07 | 4 | #### | rs1194702 | T | A | . | PA:AFM       | intronic   | NM_.      | .   | .       |
| ACa07 | 4 | #### | .         | G | T | . | PA:RASSF6    | intronic   | NM_.      | .   | .       |
| ACa07 | 4 | #### | rs3691209 | C | T | . | PA:PPEF2     | exonic     | NM_.      | mis | PPEF2:  |
| ACa07 | 4 | #### | .         | G | T | . | PA:CCDC158   | exonic     | NM_.      | syr | CCDC1   |
| ACa07 | 4 | #### | rs7609961 | C | T | . | PA:SHROOM    | exonic     | NM_.      | mis | SHROC   |
| ACa07 | 4 | #### | .         | G | T | . | PA:FRAS1     | exonic     | NM_.      | sto | FRAS1:  |
| ACa07 | 4 | #### | .         | A | G | . | PA:LIN54     | UTR5       | NM_NM_.   | .   | .       |
| ACa07 | 4 | #### | rs8867538 | T | C | . | PA:WDFY3     | intronic   | NM_.      | .   | .       |
| ACa07 | 4 | #### | .         | G | T | . | PA:FAM13A    | exonic     | NM_.      | mis | FAM13,  |
| ACa07 | 4 | #### | .         | C | A | . | PA:NFKB1     | intronic   | NM_.      | .   | .       |
| ACa07 | 4 | #### | .         | G | A | . | PA:TET2      | exonic     | NM_.      | mis | TET2:N  |
| ACa07 | 4 | #### | rs3719859 | C | T | . | PA:TBCK      | exonic     | NM_.      | unl | UNKNC   |
| ACa07 | 4 | #### | .         | C | T | . | PA:ENPEP     | exonic     | NM_.      | syr | ENPEP   |
| ACa07 | 4 | #### | .         | A | G | . | PA:.         | intergen   | NM_dist=. | .   | .       |
| ACa07 | 4 | #### | .         | A | G | . | PA:NDST3     | intronic   | NM_.      | .   | .       |
| ACa07 | 4 | #### | .         | A | G | . | PA:LOC72921  | ncRNA_NR_. | .         | .   | .       |
| ACa07 | 4 | #### | .         | G | T | . | PA:METTL14   | exonic     | NM_.      | sto | METTL   |
| ACa07 | 4 | #### | .         | C | A | . | PA:NDNF      | exonic     | NM_.      | mis | NDNF:†  |
| ACa07 | 4 | #### | rs7744530 | T | C | . | PA:ANKRD50   | exonic     | NM_.      | mis | ANKRD   |
| ACa07 | 4 | #### | .         | G | T | . | PA:C4orf29   | exonic     | NM_.      | mis | C4orf29 |
| ACa07 | 4 | #### | rs7741072 | A | G | . | PA:C4orf29   | exonic     | NM_.      | mis | C4orf29 |
| ACa07 | 4 | #### | .         | C | A | . | PA:.         | intergen   | NR_dist=. | .   | .       |
| ACa07 | 4 | #### | .         | G | A | . | PA:.         | intergen   | NR_dist=. | .   | .       |
| ACa07 | 4 | #### | .         | G | T | . | PA:TBC1D9    | exonic     | NM_.      | syr | TBC1D:  |
| ACa07 | 4 | #### | .         | G | A | . | PA:TBC1D9    | exonic     | NM_.      | syr | TBC1D:  |
| ACa07 | 4 | #### | .         | A | G | . | PA:IL15      | exonic     | NM_.      | syr | IL15:NM |
| ACa07 | 4 | #### | .         | C | A | . | PA:GYPB      | intronic   | NM_.      | .   | .       |
| ACa07 | 4 | #### | rs8661228 | T | C | . | PA:TRIM2     | intronic   | NM_.      | .   | .       |
| ACa07 | 4 | #### | rs4095550 | G | A | . | PA:KLHL2     | intronic   | NM_.      | .   | .       |
| ACa07 | 4 | #### | .         | G | A | . | PA:GALNTL6   | intronic   | NM_.      | .   | .       |
| ACa07 | 4 | #### | .         | A | G | . | PA:TENM3     | exonic     | NM_.      | mis | TENM3   |
| ACa07 | 4 | #### | rs9420962 | C | T | . | PA:CCDC110   | intronic   | NM_.      | .   | .       |
| ACa07 | 4 | #### | .         | G | A | . | PA:SORBS2    | exonic     | NM_.      | syr | SORBS   |
| ACa07 | 4 | #### | rs7781796 | G | A | . | PA:F11-AS1   | ncRNA_NR_. | .         | .   | .       |
| ACa07 | 5 | #### | .         | A | G | . | PA:SLC9A3    | intronic   | NM_.      | .   | .       |
| ACa07 | 5 | #### | .         | G | A | . | PA:CEP72     | exonic     | NM_.      | mis | CEP72:  |
| ACa07 | 5 | #### | rs412221  | G | C | . | PA:ZDHHC11   | intronic   | NM_.      | .   | .       |
| ACa07 | 5 | #### | rs1006578 | C | T | . | PA:SLC12A7   | intronic   | NM_.      | .   | .       |
| ACa07 | 5 | #### | .         | C | A | . | PA:IRX4      | exonic     | NM_.      | mis | IRX4:NI |
| ACa07 | 5 | #### | rs9030458 | G | A | . | PA:.         | intergen   | NM_dist=. | .   | .       |
| ACa07 | 5 | #### | rs7491497 | G | A | . | PA:ICE1      | exonic     | NM_.      | mis | ICE1:NI |
| ACa07 | 5 | #### | .         | G | T | . | PA:UBE2QL1   | exonic     | NM_.      | mis | UBE2Q   |
| ACa07 | 5 | #### | .         | A | G | . | PA:PAPD7     | exonic     | NM_.      | mis | PAPD7:  |
| ACa07 | 5 | #### | rs1497666 | G | A | . | PA:CTNND2    | exonic     | NM_.      | syr | CTNND   |
| ACa07 | 5 | #### | rs6554817 | G | A | . | PA:DNAH5     | intronic   | NM_.      | .   | .       |
| ACa07 | 5 | #### | rs9140889 | G | C | . | PA:TRIO      | intronic   | NM_.      | .   | .       |
| ACa07 | 5 | #### | rs7661668 | G | A | . | PA:TRIO      | intronic   | NM_.      | .   | .       |
| ACa07 | 5 | #### | rs9251299 | G | A | . | PA:.         | intergen   | NM_dist=. | .   | .       |
| ACa07 | 5 | #### | rs5697598 | G | A | . | PA:ADAMTS1   | intronic   | NM_.      | .   | .       |
| ACa07 | 5 | #### | rs8799835 | G | C | . | PA:.         | intergen   | NR_dist=. | .   | .       |
| ACa07 | 5 | #### | rs9765292 | G | T | . | PA:.         | intergen   | NR_dist=. | .   | .       |
| ACa07 | 5 | #### | rs9765293 | C | T | . | PA:.         | intergen   | NR_dist=. | .   | .       |
| ACa07 | 5 | #### | .         | C | A | . | PA:MIR3650,l | ncRNA_NR_. | .         | .   | .       |
| ACa07 | 5 | #### | .         | T | A | . | PA:PRKAA1    | UTR3       | NM_NM_.   | .   | .       |

|       |   |      |           |   |   |   |             |            |           |        |          |
|-------|---|------|-----------|---|---|---|-------------|------------|-----------|--------|----------|
| ACa07 | 5 | #### | .         | A | G | . | PA:OXCT1    | intronic   | NM_.      | .      | .        |
| ACa07 | 5 | #### | .         | G | T | . | PA:HMGCS1   | intronic   | NM_.      | .      | .        |
| ACa07 | 5 | #### | .         | T | C | . | PA:.        | intergen   | NOI       | dist=. | .        |
| ACa07 | 5 | #### | rs4327635 | T | C | . | PA:.        | intergen   | NOI       | dist=. | .        |
| ACa07 | 5 | #### | .         | A | G | . | PA:.        | intergen   | NOI       | dist=. | .        |
| ACa07 | 5 | #### | rs2005764 | C | T | . | PA:ACTBL2   | exonic     | NM_.      | mi&    | ACTBL2   |
| ACa07 | 5 | #### | .         | C | T | . | PA:PDE4D    | exonic     | NM_.      | mi&    | PDE4D    |
| ACa07 | 5 | #### | rs5582099 | C | T | . | PA:.        | intergen   | NM_dist=. | .      | .        |
| ACa07 | 5 | #### | .         | C | A | . | PA:CENPK    | splicing   | NM_NM_.   | .      | .        |
| ACa07 | 5 | #### | .         | G | A | . | PA:ERBB2IP  | intronic   | NM_.      | .      | .        |
| ACa07 | 5 | #### | rs5672287 | G | A | . | PA:MAST4    | intronic   | NM_.      | .      | .        |
| ACa07 | 5 | #### | .         | A | G | . | PA:MAST4    | exonic     | NM_.      | mi&    | MAST4    |
| ACa07 | 5 | #### | rs2016310 | C | T | . | PA:MAST4    | exonic     | NM_.      | mi&    | MAST4    |
| ACa07 | 5 | #### | .         | C | T | . | PA:PIK3R1   | exonic     | NM_.      | syr    | PIK3R1   |
| ACa07 | 5 | #### | .         | A | G | . | PA:RAD17    | intronic   | NM_.      | .      | .        |
| ACa07 | 5 | #### | .         | C | G | . | PA:GUSBP9,  | ncRNA_NR_. | .         | .      | .        |
| ACa07 | 5 | #### | .         | C | A | . | PA:MAP1B    | intronic   | NM_.      | .      | .        |
| ACa07 | 5 | #### | .         | A | G | . | PA:ANKDD1E  | intronic   | NM_.      | .      | .        |
| ACa07 | 5 | #### | .         | C | T | . | PA:HOMER1   | UTR5       | NM_NM_.   | .      | .        |
| ACa07 | 5 | #### | .         | G | A | . | PA:ACOT12   | exonic     | NM_.      | syr    | ACOT1    |
| ACa07 | 5 | #### | .         | G | A | . | PA:TMEM167  | UTR3       | NM_NM_.   | .      | .        |
| ACa07 | 5 | #### | rs3717547 | C | T | . | PA:VCAN     | intronic   | NM_.      | .      | .        |
| ACa07 | 5 | #### | rs7815826 | C | T | . | PA:.        | intergen   | NM_dist=. | .      | .        |
| ACa07 | 5 | #### | .         | G | T | . | PA:GPR98    | exonic     | NM_.      | mi&    | GPR98    |
| ACa07 | 5 | #### | .         | G | A | . | PA:KIAA0825 | exonic     | NM_.      | mi&    | KIAA08   |
| ACa07 | 5 | #### | rs7633968 | C | T | . | PA:ARSK     | exonic     | NM_.      | mi&    | ARSK:NI  |
| ACa07 | 5 | #### | .         | C | T | . | PA:.        | intergen   | NR_dist=. | .      | .        |
| ACa07 | 5 | #### | .         | A | C | . | PA:PAM      | exonic     | NM_.      | mi&    | PAM:NI   |
| ACa07 | 5 | #### | rs1114874 | C | T | . | PA:PAM      | intronic   | NM_.      | .      | .        |
| ACa07 | 5 | #### | .         | G | T | . | PA:.        | upstream   | NM_.      | .      | .        |
| ACa07 | 5 | #### | .         | A | G | . | PA:EPB41L4, | exonic     | NM_.      | syr    | EPB41L   |
| ACa07 | 5 | #### | .         | C | T | . | PA:SEMA6A   | exonic     | NM_.      | syr    | SEMA6    |
| ACa07 | 5 | #### | .         | G | T | . | PA:TNFAIP8  | intronic   | NM_.      | .      | .        |
| ACa07 | 5 | #### | rs9346631 | G | A | . | PA:SOWAHA   | exonic     | NM_.      | unl    | UNKNC    |
| ACa07 | 5 | #### | .         | A | T | . | PA:AFF4     | intronic   | NM_.      | .      | .        |
| ACa07 | 5 | #### | rs7465490 | C | T | . | PA:FSTL4    | exonic     | NM_.      | syr    | FSTL4:NI |
| ACa07 | 5 | #### | .         | C | T | . | PA:.        | upstream   | NM_.      | .      | .        |
| ACa07 | 5 | #### | rs7470418 | T | C | . | PA:DDX46    | intronic   | NM_.      | .      | .        |
| ACa07 | 5 | #### | rs7665720 | C | T | . | PA:CDC25C   | exonic     | NM_.      | mi&    | CDC25C   |
| ACa07 | 5 | #### | .         | A | G | . | PA:CDC25C   | exonic     | NM_.      | mi&    | CDC25C   |
| ACa07 | 5 | #### | .         | A | G | . | PA:EGR1     | exonic     | NM_.      | mi&    | EGR1:NI  |
| ACa07 | 5 | #### | rs7721589 | G | A | . | PA:EGR1     | exonic     | NM_.      | mi&    | EGR1:NI  |
| ACa07 | 5 | #### | .         | T | C | . | PA:ANKHD1-l | exonic     | NM_.      | mi&    | ANKHD    |
| ACa07 | 5 | #### | .         | G | A | . | PA:PCDHA4   | exonic     | NM_.      | syr    | PCDHA    |
| ACa07 | 5 | #### | .         | C | T | . | PA:PCDHA13  | exonic     | NM_.      | syr    | PCDHA    |
| ACa07 | 5 | #### | rs7823690 | G | A | . | PA:PCDHAC1  | exonic     | NM_.      | syr    | PCDHA    |
| ACa07 | 5 | #### | .         | G | A | . | PA:PCDHB6   | exonic     | NM_.      | mi&    | PCDHB    |
| ACa07 | 5 | #### | .         | C | T | . | PA:PCDHB8   | exonic     | NM_.      | mi&    | PCDHB    |
| ACa07 | 5 | #### | .         | C | T | . | PA:PCDHGA2  | exonic     | NM_.      | syr    | PCDHG    |
| ACa07 | 5 | #### | rs9814581 | C | T | . | PA:PCDHGA2  | exonic     | NM_.      | mi&    | PCDHG    |
| ACa07 | 5 | #### | rs5446331 | C | T | . | PA:PCDHGA3  | exonic     | NM_.      | syr    | PCDHG    |
| ACa07 | 5 | #### | rs3769527 | C | T | . | PA:PCDHGB3  | exonic     | NM_.      | syr    | PCDHG    |
| ACa07 | 5 | #### | rs7719463 | G | A | . | PA:PCDHGB6  | exonic     | NM_.      | mi&    | PCDHG    |
| ACa07 | 5 | #### | rs2018026 | G | A | . | PA:KIAA0141 | exonic     | NM_.      | mi&    | KIAA01   |

|       |   |      |           |   |   |   |              |            |           |             |
|-------|---|------|-----------|---|---|---|--------------|------------|-----------|-------------|
| ACa07 | 5 | #### | rs1000063 | A | G | . | PA:JAKMIP2   | UTR5       | NM_NM_.   | .           |
| ACa07 | 5 | #### | .         | T | C | . | PA:CSNK1A1   | intronic   | NM_.      | .           |
| ACa07 | 5 | #### | .         | A | T | . | PA:PDE6A     | intronic   | NM_.      | .           |
| ACa07 | 5 | #### | .         | G | A | . | PA:SYNPO     | exonic     | NM_.      | mis SYNPO   |
| ACa07 | 5 | #### | .         | C | A | . | PA:G3BP1     | exonic     | NM_.      | mis G3BP1:  |
| ACa07 | 5 | #### | rs5492040 | G | A | . | PA:CYFIP2    | intronic   | NM_.      | .           |
| ACa07 | 5 | #### | rs5611223 | C | T | . | PA:RNF145    | exonic     | NM_.      | mis RNF145  |
| ACa07 | 5 | #### | .         | G | A | . | PA:TENM2     | exonic     | NM_.      | mis TENM2   |
| ACa07 | 5 | #### | .         | C | A | . | PA:TENM2     | exonic     | NM_.      | mis TENM2   |
| ACa07 | 5 | #### | rs1491693 | C | T | . | PA:WWC1      | exonic     | NM_.      | mis WWC1:   |
| ACa07 | 5 | #### | rs7577825 | C | T | . | PA:RARS      | exonic     | NM_.      | mis RARS:†  |
| ACa07 | 5 | #### | .         | G | T | . | PA:SLIT3     | intronic   | NM_.      | .           |
| ACa07 | 5 | #### | .         | T | C | . | PA:SH3PXD2   | exonic     | NM_.      | mis SH3PXD2 |
| ACa07 | 5 | #### | rs1822272 | C | T | . | PA:NEURL1B   | intronic   | NM_.      | .           |
| ACa07 | 5 | #### | .         | C | A | . | PA:CREBRF    | intronic   | NM_.      | .           |
| ACa07 | 5 | #### | .         | T | C | . | PA:FAF2      | intronic   | NM_.      | .           |
| ACa07 | 5 | #### | .         | G | A | . | PA:FGFR4     | intronic   | NM_.      | .           |
| ACa07 | 5 | #### | rs4551119 | G | A | . | PA:FGFR4     | intronic   | NM_.      | .           |
| ACa07 | 5 | #### | rs5582208 | C | T | . | PA:FGFR4     | exonic     | NM_.      | mis FGFR4:  |
| ACa07 | 5 | #### | .         | C | A | . | PA:LOC202186 | ncRNA_NR_. | .         | .           |
| ACa07 | 5 | #### | .         | C | T | . | PA:FAM153A   | intronic   | NM_.      | .           |
| ACa07 | 5 | #### | .         | G | A | . | PA:GRM6      | UTR3       | NM_NM_.   | .           |
| ACa07 | 5 | #### | rs1025870 | G | A | . | PA:.         | intergen   | NM_dist=. | .           |
| ACa07 | 5 | #### | .         | G | A | . | PA:MGAT4B    | UTR3       | NM_NM_.   | .           |
| ACa07 | 5 | #### | .         | G | T | . | PA:GFPT2     | intronic   | NM_.      | .           |
| ACa07 | 6 | #### | rs7651293 | G | A | . | PA:RPP40     | exonic     | NM_.      | mis RPP40:  |
| ACa07 | 6 | #### | rs1023580 | A | T | . | PA:RPP40     | intronic   | NM_.      | .           |
| ACa07 | 6 | #### | rs1864505 | G | A | . | PA:.         | intergen   | NM_dist=. | .           |
| ACa07 | 6 | #### | .         | A | G | . | PA:.         | intergen   | NM_dist=. | .           |
| ACa07 | 6 | #### | rs2004302 | C | T | . | PA:BLOC1S5   | ncRNA_NR_. | .         | .           |
| ACa07 | 6 | #### | .         | T | A | . | PA:.         | intergen   | NR_dist=. | .           |
| ACa07 | 6 | #### | rs3692600 | G | A | . | PA:GCNT2     | intronic   | NM_.      | .           |
| ACa07 | 6 | #### | rs7468362 | G | A | . | PA:HIVEP1    | exonic     | NM_.      | mis HIVEP1  |
| ACa07 | 6 | #### | rs7674897 | C | T | . | PA:DTNBP1    | splicing   | NM_NM_.   | .           |
| ACa07 | 6 | #### | .         | T | G | . | PA:CASC15,   | ncRNA_NR_. | .         | .           |
| ACa07 | 6 | #### | .         | C | T | . | PA:.         | intergen   | NM_dist=. | .           |
| ACa07 | 6 | #### | .         | G | A | . | PA:FAM65B    | intronic   | NM_.      | .           |
| ACa07 | 6 | #### | .         | T | C | . | PA:GUSBP2    | ncRNA_NR_. | .         | .           |
| ACa07 | 6 | #### | .         | G | A | . | PA:.         | intergen   | NR_dist=. | .           |
| ACa07 | 6 | #### | .         | C | T | . | PA:ZSCAN12   | ncRNA_NR_. | .         | .           |
| ACa07 | 6 | #### | .         | G | A | . | PA:ZKSCAN3   | intronic   | NM_.      | .           |
| ACa07 | 6 | #### | .         | T | C | . | PA:.         | intergen   | NM_dist=. | .           |
| ACa07 | 6 | #### | rs7653588 | G | A | . | PA:ZFP57     | intronic   | NM_.      | .           |
| ACa07 | 6 | #### | .         | A | G | . | PA:HLA-H     | ncRNA_NR_. | .         | .           |
| ACa07 | 6 | #### | rs7511377 | C | T | . | PA:PRR3      | intronic   | NM_.      | .           |
| ACa07 | 6 | #### | .         | G | T | . | PA:MDC1      | intronic   | NM_.      | .           |
| ACa07 | 6 | #### | .         | G | A | . | PA:.         | upstream   | NR_.      | .           |
| ACa07 | 6 | #### | .         | A | G | . | PA:.         | intergen   | NM_dist=. | .           |
| ACa07 | 6 | #### | rs7792598 | C | T | . | PA:PRRC2A    | exonic     | NM_.      | syr PRRC2   |
| ACa07 | 6 | #### | .         | G | A | . | PA:VARS      | intronic   | NM_.      | .           |
| ACa07 | 6 | #### | .         | T | C | . | PA:HLA-DRA   | UTR3       | NM_NM_.   | .           |
| ACa07 | 6 | #### | rs1119219 | C | T | . | PA:COL11A2   | exonic     | NM_.      | mis COL11A2 |
| ACa07 | 6 | #### | rs7759216 | C | T | . | PA:COL11A2   | exonic     | NM_.      | syr COL11A2 |
| ACa07 | 6 | #### | .         | G | A | . | PA:ITPR3     | exonic     | NM_.      | mis ITPR3:† |

|       |   |      |           |   |   |   |             |            |           |     |        |
|-------|---|------|-----------|---|---|---|-------------|------------|-----------|-----|--------|
| ACa07 | 6 | #### | .         | G | T | . | PA:PACSIN1  | exonic     | NM_.      | mis | PACSIN |
| ACa07 | 6 | #### | rs7740360 | C | T | . | PA:PPARD    | UTR5       | NM_NM_.   | .   | .      |
| ACa07 | 6 | #### | .         | C | T | . | PA:PPARD    | intronic   | NM_.      | .   | .      |
| ACa07 | 6 | #### | rs7715433 | C | T | . | PA:PPARD    | exonic     | NM_.      | syr | PPARD  |
| ACa07 | 6 | #### | .         | G | A | . | PA:RPL10A   | intronic   | NM_.      | .   | .      |
| ACa07 | 6 | #### | .         | G | C | . | PA:SLC26A8  | intronic   | NM_.      | .   | .      |
| ACa07 | 6 | #### | rs1007644 | G | A | . | PA:CPNE5    | exonic     | NM_.      | mis | CPNE5  |
| ACa07 | 6 | #### | .         | A | G | . | PA:DAAM2    | intronic   | NM_.      | .   | .      |
| ACa07 | 6 | #### | rs3751257 | C | T | . | PA:.        | downstr    | NR_.      | .   | .      |
| ACa07 | 6 | #### | rs7778285 | G | A | . | PA:MDFI     | exonic     | NM_.      | mis | MDFI:N |
| ACa07 | 6 | #### | .         | C | A | . | PA:FRS3     | exonic     | NM_.      | mis | FRS3:N |
| ACa07 | 6 | #### | rs8008274 | C | A | . | PA:GUCA1B   | intronic   | NM_.      | .   | .      |
| ACa07 | 6 | #### | rs7806884 | C | T | . | PA:TRERF1   | exonic     | NM_.      | unl | UNKNC  |
| ACa07 | 6 | #### | .         | G | T | . | PA:PRPH2    | exonic     | NM_.      | syr | PRPH2  |
| ACa07 | 6 | #### | rs1434417 | C | T | . | PA:PTK7     | exonic     | NM_.      | syr | PTK7:N |
| ACa07 | 6 | #### | .         | C | T | . | PA:PTK7     | exonic     | NM_.      | mis | PTK7:N |
| ACa07 | 6 | #### | .         | G | T | . | PA:ZNF318   | intronic   | NM_.      | .   | .      |
| ACa07 | 6 | #### | .         | A | G | . | PA:YIPF3    | intronic   | NM_.      | .   | .      |
| ACa07 | 6 | #### | rs1496900 | G | A | . | PA:XPO5     | exonic     | NM_.      | syr | XPO5:N |
| ACa07 | 6 | #### | rs1435325 | G | A | . | PA:TCTE1    | exonic     | NM_.      | mis | TCTE1: |
| ACa07 | 6 | #### | .         | G | A | . | PA:.        | intergen   | NM_dist=. | .   | .      |
| ACa07 | 6 | #### | .         | C | A | . | PA:DST      | exonic     | NM_.      | mis | DST:NM |
| ACa07 | 6 | #### | .         | C | G | . | PA:.        | intergen   | NM_dist=. | .   | .      |
| ACa07 | 6 | #### | .         | A | G | . | PA:COL19A1  | exonic     | NM_.      | syr | COL19/ |
| ACa07 | 6 | #### | rs2021606 | A | G | . | PA:SMAP1    | UTR3       | NM_NM_.   | .   | .      |
| ACa07 | 6 | #### | .         | A | T | . | PA:KHDC3L   | intronic   | NM_.      | .   | .      |
| ACa07 | 6 | #### | .         | C | A | . | PA:CD109    | intronic   | NM_.      | .   | .      |
| ACa07 | 6 | #### | rs7761622 | C | T | . | PA:PHIP     | exonic     | NM_.      | mis | PHIP:N |
| ACa07 | 6 | #### | rs1497660 | C | T | . | PA:BCKDHB   | exonic     | NM_.      | mis | BCKDHB |
| ACa07 | 6 | #### | rs1002475 | T | C | . | PA:CYB5R4   | intronic   | NM_.      | .   | .      |
| ACa07 | 6 | #### | rs7619979 | G | A | . | PA:SLC35A1  | exonic     | NM_.      | syr | SLC35/ |
| ACa07 | 6 | #### | rs1015787 | G | A | . | PA:MDN1     | intronic   | NM_.      | .   | .      |
| ACa07 | 6 | #### | .         | C | T | . | PA:.        | downstr    | NM_.      | .   | .      |
| ACa07 | 6 | #### | .         | T | C | . | PA:POU3F2   | exonic     | NM_.      | mis | POU3F/ |
| ACa07 | 6 | #### | rs5581466 | A | C | . | PA:LOC10042 | ncRNA_NR_. | .         | .   | .      |
| ACa07 | 6 | #### | .         | T | C | . | PA:NR2E1    | intronic   | NM_.      | .   | .      |
| ACa07 | 6 | #### | .         | T | C | . | PA:SESN1    | intronic   | NM_.      | .   | .      |
| ACa07 | 6 | #### | .         | T | C | . | PA:PPIL6    | UTR5       | NM_NM_.   | .   | .      |
| ACa07 | 6 | #### | .         | G | T | . | PA:MICAL1   | intronic   | NM_.      | .   | .      |
| ACa07 | 6 | #### | .         | G | T | . | PA:REV3L    | exonic     | NM_.      | mis | REV3L: |
| ACa07 | 6 | #### | .         | C | T | . | PA:.        | intergen   | NM_dist=. | .   | .      |
| ACa07 | 6 | #### | .         | G | A | . | PA:.        | intergen   | NM_dist=. | .   | .      |
| ACa07 | 6 | #### | .         | T | C | . | PA:TRMT11   | intronic   | NM_.      | .   | .      |
| ACa07 | 6 | #### | rs3754749 | C | T | . | PA:LAMA2    | intronic   | NM_.      | .   | .      |
| ACa07 | 6 | #### | .         | A | C | . | PA:LAMA2    | intronic   | NM_.      | .   | .      |
| ACa07 | 6 | #### | rs7606036 | G | A | . | PA:EYA4     | exonic     | NM_.      | mis | EYA4:N |
| ACa07 | 6 | #### | rs5279151 | G | A | . | PA:ALDH8A1  | intronic   | NM_.      | .   | .      |
| ACa07 | 6 | #### | rs1006659 | T | C | . | PA:IL20RA   | intronic   | NM_.      | .   | .      |
| ACa07 | 6 | #### | .         | T | C | . | PA:KIAA1244 | intronic   | NM_.      | .   | .      |
| ACa07 | 6 | #### | .         | C | T | . | PA:KIAA1244 | intronic   | NM_.      | .   | .      |
| ACa07 | 6 | #### | rs1910958 | G | A | . | PA:GPR126   | intronic   | NM_.      | .   | .      |
| ACa07 | 6 | #### | rs1401901 | G | A | . | PA:STX11    | exonic     | NM_.      | mis | STX11: |
| ACa07 | 6 | #### | .         | A | G | . | PA:ADGB     | exonic     | NM_.      | mis | ADGB:f |
| ACa07 | 6 | #### | rs7737449 | C | T | . | PA:UST      | exonic     | NM_.      | mis | UST:NM |



|       |   |      |           |   |   |   |             |            |           |             |
|-------|---|------|-----------|---|---|---|-------------|------------|-----------|-------------|
| ACa07 | 6 | #### | rs7774557 | A | G | . | PA:GINM1    | exonic     | NM_.      | miR GINM1:  |
| ACa07 | 6 | #### | .         | T | C | . | PA:KATNA1   | exonic     | NM_.      | miR KATNA   |
| ACa07 | 6 | #### | .         | T | C | . | PA:RAET1E-7 | ncRNA_NR_. | .         | .           |
| ACa07 | 6 | #### | .         | C | T | . | PA:AKAP12   | intronic   | NM_.      | .           |
| ACa07 | 6 | #### | .         | C | T | . | PA:SYNE1    | intronic   | NM_.      | .           |
| ACa07 | 6 | #### | rs5290225 | G | A | . | PA:SYNE1    | intronic   | NM_.      | .           |
| ACa07 | 6 | #### | .         | T | C | . | PA:SYNE1    | intronic   | NM_.      | .           |
| ACa07 | 6 | #### | .         | T | C | . | PA:IPCEF1   | exonic     | NM_.      | miR IPCEF1  |
| ACa07 | 6 | #### | .         | G | A | . | PA:SCAF8    | exonic     | NM_.      | miR SCAF8:  |
| ACa07 | 6 | #### | .         | C | T | . | PA:ARID1B   | exonic     | NM_.      | sto ARID1E  |
| ACa07 | 6 | #### | rs1015839 | G | A | . | PA:TMEM181  | intronic   | NM_.      | .           |
| ACa07 | 6 | #### | .         | C | T | . | PA:SOD2     | exonic     | NM_.      | miR SOD2:N  |
| ACa07 | 6 | #### | .         | G | A | . | PA:.        | intergen   | NM_dist=. | .           |
| ACa07 | 6 | #### | .         | C | T | . | PA:LOC72960 | ncRNA_NR_. | .         | .           |
| ACa07 | 6 | #### | .         | C | T | . | PA:LPA      | intronic   | NM_.      | .           |
| ACa07 | 6 | #### | .         | C | T | . | PA:MAP3K4   | intronic   | NM_.      | .           |
| ACa07 | 6 | #### | .         | T | C | . | PA:PARK2    | exonic     | NM_.      | miR PARK2:  |
| ACa07 | 6 | #### | rs7739962 | C | T | . | PA:QKI      | exonic     | NM_.      | syr QKI:NM  |
| ACa07 | 6 | #### | rs2008105 | G | A | . | PA:C6orf118 | exonic     | NM_.      | miR C6orf11 |
| ACa07 | 6 | #### | rs7558449 | C | T | . | PA:TCP10    | intronic   | NM_.      | .           |
| ACa07 | 6 | #### | .         | A | G | . | PA:WDR27    | UTR5       | NM_NM_.   | .           |
| ACa07 | 7 | #### | .         | T | A | . | PA:FAM20C   | exonic     | NM_.      | miR FAM20C  |
| ACa07 | 7 | #### | .         | C | T | . | PA:.        | intergen   | NM_dist=. | .           |
| ACa07 | 7 | #### | .         | G | T | . | PA:MICALL2  | intronic   | NM_.      | .           |
| ACa07 | 7 | #### | .         | C | T | . | PA:INTS1    | exonic     | NM_.      | miR INTS1:f |
| ACa07 | 7 | #### | .         | C | T | . | PA:INTS1    | exonic     | NM_.      | miR INTS1:f |
| ACa07 | 7 | #### | rs7786995 | G | A | . | PA:INTS1    | exonic     | NM_.      | syr INTS1:f |
| ACa07 | 7 | #### | .         | A | G | . | PA:TMEM184  | intronic   | NM_.      | .           |
| ACa07 | 7 | #### | .         | G | A | . | PA:NUDT1    | intronic   | NM_.      | .           |
| ACa07 | 7 | #### | rs5612232 | G | A | . | PA:CHST12   | exonic     | NM_.      | syr CHST1:  |
| ACa07 | 7 | #### | .         | C | T | . | PA:CARD11   | intronic   | NM_.      | .           |
| ACa07 | 7 | #### | rs3699321 | C | T | . | PA:SDK1     | intronic   | NM_.      | .           |
| ACa07 | 7 | #### | .         | C | A | . | PA:SDK1     | intronic   | NM_.      | .           |
| ACa07 | 7 | #### | rs5413152 | C | T | . | PA:AP5Z1    | intronic   | NM_.      | .           |
| ACa07 | 7 | #### | .         | C | T | . | PA:CCZ1     | exonic     | NM_.      | miR CCZ1:N  |
| ACa07 | 7 | #### | .         | C | A | . | PA:CYTH3    | exonic     | NM_.      | miR CYTH3:  |
| ACa07 | 7 | #### | rs7747652 | C | A | . | PA:DAGLB    | exonic     | NM_.      | miR DAGLB   |
| ACa07 | 7 | #### | .         | G | T | . | PA:GRID2IP  | exonic     | NM_.      | syr GRID2I  |
| ACa07 | 7 | #### | .         | C | T | . | PA:C7orf26  | exonic     | NM_.      | miR C7orf26 |
| ACa07 | 7 | #### | .         | C | T | . | PA:ZNF316   | exonic     | NM_.      | syr ZNF316  |
| ACa07 | 7 | #### | rs7800175 | G | A | . | PA:CCZ1B    | intronic   | NM_.      | .           |
| ACa07 | 7 | #### | rs8790524 | A | G | . | PA:CCZ1B    | intronic   | NM_.      | .           |
| ACa07 | 7 | #### | rs3726603 | G | A | . | PA:CCZ1B    | intronic   | NM_.      | .           |
| ACa07 | 7 | #### | .         | T | C | . | PA:COL28A1  | exonic     | NM_.      | miR COL28A  |
| ACa07 | 7 | #### | .         | G | A | . | PA:MIOS     | exonic     | NM_.      | miR MIOS:N  |
| ACa07 | 7 | #### | .         | G | A | . | PA:.        | intergen   | NR_dist=. | .           |
| ACa07 | 7 | #### | .         | C | A | . | PA:THSD7A   | exonic     | NM_.      | miR THSD7:  |
| ACa07 | 7 | #### | .         | T | C | . | PA:ABCB5    | intronic   | NM_.      | .           |
| ACa07 | 7 | #### | rs3710375 | C | T | . | PA:DNAH11   | exonic     | NM_.      | syr DNAH1   |
| ACa07 | 7 | #### | .         | T | C | . | PA:STEAP1B  | UTR3       | NM_NM_.   | .           |
| ACa07 | 7 | #### | .         | A | T | . | PA:CCDC126  | intronic   | NM_.      | .           |
| ACa07 | 7 | #### | rs1427054 | C | T | . | PA:HIBADH   | exonic     | NM_.      | miR HIBADH  |
| ACa07 | 7 | #### | .         | T | C | . | PA:NOD1     | exonic     | NM_.      | miR NOD1:f  |
| ACa07 | 7 | #### | .         | C | T | . | PA:.        | intergen   | NR_dist=. | .           |

|       |   |      |           |   |   |   |              |           |          |            |
|-------|---|------|-----------|---|---|---|--------------|-----------|----------|------------|
| ACa07 | 7 | #### | .         | G | T | . | PA:DPY19L1F  | ncRNA_NR_ | .        | .          |
| ACa07 | 7 | #### | rs7507081 | C | T | . | PA:FKBP9     | exonic    | NM_      | syr FKBP9: |
| ACa07 | 7 | #### | .         | C | T | . | PA:BBS9      | UTR3      | NM_NM_   | .          |
| ACa07 | 7 | #### | .         | G | A | . | PA:DPY19L1   | intronic  | NM_      | .          |
| ACa07 | 7 | #### | rs7696767 | C | T | . | PA:DPY19L2F  | ncRNA_NR_ | .        | .          |
| ACa07 | 7 | #### | .         | G | A | . | PA:.         | intergen  | NM_dist= | .          |
| ACa07 | 7 | #### | rs7755650 | G | A | . | PA:HECW1     | exonic    | NM_      | syr HECW1  |
| ACa07 | 7 | #### | .         | G | A | . | PA:HECW1     | intronic  | NM_      | .          |
| ACa07 | 7 | #### | .         | G | A | . | PA:URGCP     | exonic    | NM_      | unl UNKNC  |
| ACa07 | 7 | #### | rs1113701 | G | A | . | PA:MYL7      | intronic  | NM_      | .          |
| ACa07 | 7 | #### | .         | G | A | . | PA:TMED4     | intronic  | NM_      | .          |
| ACa07 | 7 | #### | .         | G | T | . | PA:OGDH      | intronic  | NM_      | .          |
| ACa07 | 7 | #### | rs7476235 | C | T | . | PA:ADCY1     | exonic    | NM_      | syr ADCY1  |
| ACa07 | 7 | #### | rs1024757 | G | A | . | PA:IGFBP3    | intronic  | NM_      | .          |
| ACa07 | 7 | #### | .         | A | C | . | PA:TNS3      | intronic  | NM_      | .          |
| ACa07 | 7 | #### | .         | T | C | . | PA:C7orf69   | exonic    | NM_      | unl UNKNC  |
| ACa07 | 7 | #### | .         | G | A | . | PA:NUPR1L    | exonic    | NM_      | mis NUPR1  |
| ACa07 | 7 | #### | .         | C | T | . | PA:.         | intergen  | NM_dist= | .          |
| ACa07 | 7 | #### | .         | G | T | . | PA:.         | intergen  | NR_dist= | .          |
| ACa07 | 7 | #### | .         | C | T | . | PA:.         | intergen  | NR_dist= | .          |
| ACa07 | 7 | #### | rs3749762 | T | G | . | PA:.         | intergen  | NR_dist= | .          |
| ACa07 | 7 | #### | .         | C | T | . | PA:.         | intergen  | NR_dist= | .          |
| ACa07 | 7 | #### | rs8799601 | C | T | . | PA:.         | intergen  | NR_dist= | .          |
| ACa07 | 7 | #### | .         | G | A | . | PA:.         | intergen  | NR_dist= | .          |
| ACa07 | 7 | #### | .         | C | T | . | PA:.         | intergen  | NR_dist= | .          |
| ACa07 | 7 | #### | .         | C | T | . | PA:.         | intergen  | NR_dist= | .          |
| ACa07 | 7 | #### | .         | G | T | . | PA:.         | intergen  | NR_dist= | .          |
| ACa07 | 7 | #### | .         | G | A | . | PA:.         | intergen  | NR_dist= | .          |
| ACa07 | 7 | #### | rs6156381 | C | T | . | PA:.         | ncRNA_NR_ | .        | .          |
| ACa07 | 7 | #### | .         | G | T | . | PA:CCT6P1    | ncRNA_NR_ | .        | .          |
| ACa07 | 7 | #### | .         | G | A | . | PA:CCT6P1    | ncRNA_NR_ | .        | .          |
| ACa07 | 7 | #### | rs5480693 | T | A | . | PA:TYW1      | intronic  | NM_      | .          |
| ACa07 | 7 | #### | rs7706902 | C | T | . | PA:WBSCR17   | exonic    | NM_      | mis WBSCF  |
| ACa07 | 7 | #### | rs5574064 | C | T | . | PA:SPDYE7P   | ncRNA_NR_ | .        | .          |
| ACa07 | 7 | #### | .         | T | C | . | PA:NCF1B     | ncRNA_NR_ | .        | .          |
| ACa07 | 7 | #### | .         | G | A | . | PA:FKBP6     | UTR5      | NM_NM_   | .          |
| ACa07 | 7 | #### | .         | C | T | . | PA:FZD9      | exonic    | NM_      | mis FZD9:N |
| ACa07 | 7 | #### | rs7822351 | C | T | . | PA:BAZ1B     | exonic    | NM_      | mis BAZ1B: |
| ACa07 | 7 | #### | .         | G | T | . | PA:ABHD11    | intronic  | NM_      | .          |
| ACa07 | 7 | #### | .         | G | A | . | PA:LAT2      | intronic  | NM_      | .          |
| ACa07 | 7 | #### | rs7822129 | G | A | . | PA:GTF2IRD7  | exonic    | NM_      | mis GTF2IR |
| ACa07 | 7 | #### | rs3705131 | T | C | . | PA:NCF1      | intronic  | NM_      | .          |
| ACa07 | 7 | #### | rs8799812 | T | C | . | PA:GTF2IP1,1 | ncRNA_NR_ | .        | .          |
| ACa07 | 7 | #### | rs1493360 | T | C | . | PA:FDPSP2    | ncRNA_NR_ | .        | .          |
| ACa07 | 7 | #### | rs1403890 | T | A | . | PA:DTX2      | intronic  | NM_      | .          |
| ACa07 | 7 | #### | .         | G | A | . | PA:CACNA2C   | intronic  | NM_      | .          |
| ACa07 | 7 | #### | .         | A | G | . | PA:.         | intergen  | NM_dist= | .          |
| ACa07 | 7 | #### | .         | C | A | . | PA:PCLO      | exonic    | NM_      | mis PCLO:M |
| ACa07 | 7 | #### | rs1413343 | G | A | . | PA:CDK14     | exonic    | NM_      | mis CDK14: |
| ACa07 | 7 | #### | rs9879024 | G | T | . | PA:.         | upstream  | NM_      | .          |
| ACa07 | 7 | #### | rs7641741 | G | A | . | PA:COL1A2    | exonic    | NM_      | mis COL1A: |
| ACa07 | 7 | #### | .         | T | G | . | PA:SGCE      | intronic  | NM_      | .          |
| ACa07 | 7 | #### | .         | G | A | . | PA:ASB4      | intronic  | NM_      | .          |
| ACa07 | 7 | #### | .         | G | T | . | PA:LMTK2     | splicing  | NM_NM_   | .          |

|       |   |      |           |   |   |   |            |            |           |     |        |
|-------|---|------|-----------|---|---|---|------------|------------|-----------|-----|--------|
| ACa07 | 7 | #### | rs7821462 | C | T | . | PA:TRRAP   | intronic   | NM_.      | .   | .      |
| ACa07 | 7 | #### | rs7752142 | C | T | . | PA:TRRAP   | exonic     | NM_.      | mis | TRRAP  |
| ACa07 | 7 | #### | .         | C | T | . | PA:MYH16   | ncRNA_NR_. | .         | .   | .      |
| ACa07 | 7 | #### | rs9034524 | G | A | . | PA:MYH16   | ncRNA_NR_. | .         | .   | .      |
| ACa07 | 7 | #### | rs5767320 | G | A | . | PA:PCOLCE  | exonic     | NM_.      | mis | PCOLC  |
| ACa07 | 7 | #### | .         | C | T | . | PA:ACTL6B  | exonic     | NM_.      | syr | ACTL6B |
| ACa07 | 7 | #### | rs7641678 | C | T | . | PA:MUC12   | exonic     | NM_.      | sto | MUC12  |
| ACa07 | 7 | #### | .         | G | A | . | PA:MOGAT3  | intronic   | NM_.      | .   | .      |
| ACa07 | 7 | #### | .         | G | A | . | PA:CUX1    | exonic     | NM_.      | mis | CUX1:M |
| ACa07 | 7 | #### | rs7590335 | C | T | . | PA:RASA4B  | exonic     | NM_.      | syr | RASA4B |
| ACa07 | 7 | #### | rs4729845 | T | C | . | PA:SPDYE2B | intronic   | NM_.      | .   | .      |
| ACa07 | 7 | #### | .         | C | T | . | PA:PSMC2   | exonic     | NM_.      | mis | PSMC2  |
| ACa07 | 7 | #### | .         | G | A | . | PA:ORC5    | exonic     | NM_.      | mis | ORC5:M |
| ACa07 | 7 | #### | .         | T | C | . | PA:LRRN3   | exonic     | NM_.      | syr | LRRN3  |
| ACa07 | 7 | #### | .         | G | A | . | PA:IFRD1   | intronic   | NM_.      | .   | .      |
| ACa07 | 7 | #### | .         | G | A | . | PA:ASZ1    | intronic   | NM_.      | .   | .      |
| ACa07 | 7 | #### | rs1457073 | C | T | . | PA:AASS    | intronic   | NM_.      | .   | .      |
| ACa07 | 7 | #### | .         | G | A | . | PA:.       | intergen   | NR_dist=. | .   | .      |
| ACa07 | 7 | #### | rs3755434 | C | T | . | PA:GPR37   | exonic     | NM_.      | mis | GPR37  |
| ACa07 | 7 | #### | .         | T | A | . | PA:.       | intergen   | NM_dist=. | .   | .      |
| ACa07 | 7 | #### | .         | G | T | . | PA:FLNC    | exonic     | NM_.      | mis | FLNC:M |
| ACa07 | 7 | #### | rs2006779 | C | T | . | PA:SMO     | exonic     | NM_.      | syr | SMO:NI |
| ACa07 | 7 | #### | .         | G | T | . | PA:.       | upstream   | NM_.      | .   | .      |
| ACa07 | 7 | #### | rs3679590 | G | A | . | PA:PLXNA4  | exonic     | NM_.      | mis | PLXNA4 |
| ACa07 | 7 | #### | .         | C | A | . | PA:.       | intergen   | NM_dist=. | .   | .      |
| ACa07 | 7 | #### | .         | G | A | . | PA:DGKI    | intronic   | NM_.      | .   | .      |
| ACa07 | 7 | #### | .         | A | G | . | PA:DGKI    | exonic     | NM_.      | mis | DGKI:N |
| ACa07 | 7 | #### | .         | C | T | . | PA:CREB3L2 | exonic     | NM_.      | mis | CREB3  |
| ACa07 | 7 | #### | rs1825415 | G | A | . | PA:ATP6V0A | intronic   | NM_.      | .   | .      |
| ACa07 | 7 | #### | .         | T | C | . | PA:SLC37A3 | intronic   | NM_.      | .   | .      |
| ACa07 | 7 | #### | .         | C | T | . | PA:.       | intergen   | NM_dist=. | .   | .      |
| ACa07 | 7 | #### | .         | C | T | . | PA:AGK     | intronic   | NM_.      | .   | .      |
| ACa07 | 7 | #### | rs7825497 | C | T | . | PA:MGAM    | exonic     | NM_.      | mis | MGAM   |
| ACa07 | 7 | #### | .         | C | T | . | PA:.       | exonic     | NM_.      | unl | UNKNC  |
| ACa07 | 7 | #### | .         | C | A | . | PA:.       | intergen   | NR_dist=. | .   | .      |
| ACa07 | 7 | #### | .         | C | T | . | PA:.       | intergen   | NR_dist=. | .   | .      |
| ACa07 | 7 | #### | .         | C | T | . | PA:.       | intergen   | NR_dist=. | .   | .      |
| ACa07 | 7 | #### | rs7663697 | C | T | . | PA:.       | intergen   | NR_dist=. | .   | .      |
| ACa07 | 7 | #### | .         | G | A | . | PA:GSTK1   | intronic   | NM_.      | .   | .      |
| ACa07 | 7 | #### | rs3733853 | G | A | . | PA:FAM131B | intronic   | NM_.      | .   | .      |
| ACa07 | 7 | #### | rs7598872 | C | T | . | PA:CNTNAP2 | exonic     | NM_.      | syr | CNTNA2 |
| ACa07 | 7 | #### | rs8019707 | C | T | . | PA:KRBA1   | intronic   | NM_.      | .   | .      |
| ACa07 | 7 | #### | rs1447568 | G | A | . | PA:SSPO    | exonic     | NM_.      | mis | SSPO:M |
| ACa07 | 7 | #### | .         | T | G | . | PA:ZNF775  | UTR3       | NM_NM_.   | .   | .      |
| ACa07 | 7 | #### | .         | A | G | . | PA:NOS3    | intronic   | NM_.      | .   | .      |
| ACa07 | 7 | #### | .         | C | T | . | PA:ATG9B   | exonic     | NM_.      | unl | UNKNC  |
| ACa07 | 7 | #### | .         | C | T | . | PA:CDK5    | exonic     | NM_.      | mis | CDK5:M |
| ACa07 | 7 | #### | .         | C | T | . | PA:TMUB1   | exonic     | NM_.      | mis | TMUB1  |
| ACa07 | 7 | #### | .         | C | T | . | PA:PRKAG2  | intronic   | NM_.      | .   | .      |
| ACa07 | 7 | #### | .         | C | T | . | PA:PRKAG2  | intronic   | NM_.      | .   | .      |
| ACa07 | 7 | #### | rs3761181 | C | T | . | PA:KMT2C   | exonic     | NM_.      | mis | KMT2C  |
| ACa07 | 7 | #### | .         | G | C | . | PA:ACTR3B  | intronic   | NM_.      | .   | .      |
| ACa07 | 7 | #### | rs9367654 | G | A | . | PA:DPP6    | intronic   | NM_.      | .   | .      |
| ACa07 | 7 | #### | .         | G | T | . | PA:UBE3C   | intronic   | NM_.      | .   | .      |

|       |   |      |           |   |   |   |             |           |           |     |        |
|-------|---|------|-----------|---|---|---|-------------|-----------|-----------|-----|--------|
| ACa07 | 7 | #### | rs1056749 | G | A | . | PA:PTPRN2   | intronic  | NM_       | .   | .      |
| ACa07 | 7 | #### | rs3696336 | T | A | . | PA:PTPRN2   | intronic  | NM_       | .   | .      |
| ACa07 | 7 | #### | .         | C | T | . | PA:.        | intergen  | NM_dist=  | .   | .      |
| ACa07 | 8 | #### | .         | C | T | . | PA:FAM87A   | ncRNA_NR_ | .         | .   | .      |
| ACa07 | 8 | #### | .         | T | A | . | PA:CLN8     | exonic    | NM_       | syr | CLN8:N |
| ACa07 | 8 | #### | rs1995647 | G | A | . | PA:XKR5     | exonic    | NM_       | mi  | XKR5:N |
| ACa07 | 8 | #### | .         | C | A | . | PA:DEFA4    | intronic  | NM_       | .   | .      |
| ACa07 | 8 | #### | rs7692119 | T | C | . | PA:USP17L1  | exonic    | NM_       | syr | USP17L |
| ACa07 | 8 | #### | rs2946428 | C | T | . | PA:.        | intergen  | NR_dist=  | .   | .      |
| ACa07 | 8 | #### | rs7810476 | C | T | . | PA:CLDN23   | exonic    | NM_       | syr | CLDN2: |
| ACa07 | 8 | #### | rs7606573 | G | A | . | PA:RP1L1    | exonic    | NM_       | mi  | RP1L1: |
| ACa07 | 8 | #### | .         | G | A | . | PA:C8orf74  | splicing  | NM_NM_    | .   | .      |
| ACa07 | 8 | #### | rs7511375 | C | T | . | PA:SOX7     | intronic  | NM_       | .   | .      |
| ACa07 | 8 | #### | rs7626017 | C | T | . | PA:SLC35G5  | exonic    | NM_       | syr | SLC35C |
| ACa07 | 8 | #### | .         | C | T | . | PA:TDH      | ncRNA_NR_ | .         | .   | .      |
| ACa07 | 8 | #### | .         | C | T | . | PA:FAM66A   | ncRNA_NR_ | .         | .   | .      |
| ACa07 | 8 | #### | rs3988723 | A | G | . | PA:FAM86B2  | intronic  | NM_       | .   | .      |
| ACa07 | 8 | #### | rs3713666 | A | T | . | PA:LOC72970 | ncRNA_NR_ | .         | .   | .      |
| ACa07 | 8 | #### | rs1036449 | G | A | . | PA:DLC1     | intronic  | NM_       | .   | .      |
| ACa07 | 8 | #### | .         | T | C | . | PA:TUSC3    | exonic    | NM_       | mi  | TUSC3: |
| ACa07 | 8 | #### | rs1470216 | A | G | . | PA:.        | intergen  | NR_dist=  | .   | .      |
| ACa07 | 8 | #### | rs1394112 | G | A | . | PA:.        | intergen  | NR_dist=  | .   | .      |
| ACa07 | 8 | #### | .         | C | T | . | PA:HR       | intronic  | NM_       | .   | .      |
| ACa07 | 8 | #### | .         | G | T | . | PA:TNFRSF1  | UTR3      | NM_NM_    | .   | .      |
| ACa07 | 8 | #### | .         | C | A | . | PA:R3HCC1   | intronic  | NM_       | .   | .      |
| ACa07 | 8 | #### | .         | G | T | . | PA:NKX2-6   | exonic    | NM_       | syr | NKX2-6 |
| ACa07 | 8 | #### | rs7690910 | C | T | . | PA:DOCK5    | intronic  | NM_       | .   | .      |
| ACa07 | 8 | #### | rs2013688 | G | A | . | PA:KCTD9    | intronic  | NM_       | .   | .      |
| ACa07 | 8 | #### | .         | G | A | . | PA:PNMA2    | UTR3      | NM_NM_    | .   | .      |
| ACa07 | 8 | #### | rs7247582 | C | T | . | PA:EPHX2    | exonic    | NM_       | mi  | EPHX2: |
| ACa07 | 8 | #### | .         | G | A | . | PA:KIF13B   | intronic  | NM_       | .   | .      |
| ACa07 | 8 | #### | rs1419780 | G | A | . | PA:TEX15    | exonic    | NM_       | sto | TEX15: |
| ACa07 | 8 | #### | rs1198970 | G | A | . | PA:DUSP26   | exonic    | NM_       | syr | DUSP2  |
| ACa07 | 8 | #### | rs5320288 | C | T | . | PA:KCNU1    | intronic  | NM_       | .   | .      |
| ACa07 | 8 | #### | .         | C | T | . | PA:ERLIN2   | intronic  | NM_       | .   | .      |
| ACa07 | 8 | #### | rs7612284 | G | A | . | PA:FGFR1    | intronic  | NM_       | .   | .      |
| ACa07 | 8 | #### | .         | C | T | . | PA:FGFR1    | intronic  | NM_       | .   | .      |
| ACa07 | 8 | #### | rs7608102 | G | A | . | PA:TACC1    | exonic    | NM_       | mi  | TACC1: |
| ACa07 | 8 | #### | .         | T | C | . | PA:ADAM18   | intronic  | NM_       | .   | .      |
| ACa07 | 8 | #### | .         | C | T | . | PA:.        | intergen  | NM_dist=  | .   | .      |
| ACa07 | 8 | #### | rs3705628 | G | A | . | PA:KAT6A    | intronic  | NM_       | .   | .      |
| ACa07 | 8 | #### | rs7605197 | G | A | . | PA:POLB     | intronic  | NM_       | .   | .      |
| ACa07 | 8 | #### | .         | G | A | . | PA:.        | intergen  | NM_dist=  | .   | .      |
| ACa07 | 8 | #### | rs3733322 | T | G | . | PA:.        | intergen  | NM_dist=  | .   | .      |
| ACa07 | 8 | #### | rs2003364 | T | C | . | PA:.        | intergen  | NM_dist=  | .   | .      |
| ACa07 | 8 | #### | .         | A | C | . | PA:.        | intergen  | NM_dist=  | .   | .      |
| ACa07 | 8 | #### | rs4498566 | A | C | . | PA:.        | intergen  | NOI dist= | .   | .      |
| ACa07 | 8 | #### | .         | G | A | . | PA:.        | intergen  | NOI dist= | .   | .      |
| ACa07 | 8 | #### | rs4401873 | C | G | . | PA:.        | intergen  | NOI dist= | .   | .      |
| ACa07 | 8 | #### | .         | G | T | . | PA:EFCAB1   | exonic    | NM_       | mi  | EFCAB  |
| ACa07 | 8 | #### | .         | T | C | . | PA:SNTG1    | intronic  | NM_       | .   | .      |
| ACa07 | 8 | #### | .         | A | G | . | PA:.        | downstr   | NM_       | .   | .      |
| ACa07 | 8 | #### | rs1871956 | C | T | . | PA:.        | intergen  | NM_dist=  | .   | .      |
| ACa07 | 8 | #### | .         | G | A | . | PA:.        | intergen  | NM_dist=  | .   | .      |

|       |   |      |           |   |   |   |            |            |           |     |         |
|-------|---|------|-----------|---|---|---|------------|------------|-----------|-----|---------|
| ACa07 | 8 | #### | .         | T | A | . | PA:NSMAF   | intronic   | NM_.      | .   | .       |
| ACa07 | 8 | #### | rs7793713 | G | A | . | PA:CA8     | exonic     | NM_.      | syr | CA8:NM  |
| ACa07 | 8 | #### | rs1513224 | C | T | . | PA:CHD7    | intronic   | NM_.      | .   | .       |
| ACa07 | 8 | #### | rs8897899 | G | A | . | PA:PDE7A   | intronic   | NM_.      | .   | .       |
| ACa07 | 8 | #### | .         | A | G | . | PA:CSPP1   | exonic     | NM_.      | syr | CSPP1:  |
| ACa07 | 8 | #### | .         | G | T | . | PA:CSPP1   | intronic   | NM_.      | .   | .       |
| ACa07 | 8 | #### | rs7454376 | G | A | . | PA:PREX2   | intronic   | NM_.      | .   | .       |
| ACa07 | 8 | #### | .         | G | A | . | PA:C8orf89 | exonic     | NM_.      | mis | C8orf89 |
| ACa07 | 8 | #### | .         | C | T | . | PA:.       | intergen   | NM_dist=. | .   | .       |
| ACa07 | 8 | #### | .         | T | C | . | PA:FABP4   | intronic   | NM_.      | .   | .       |
| ACa07 | 8 | #### | .         | T | C | . | PA:CNGB3   | intronic   | NM_.      | .   | .       |
| ACa07 | 8 | #### | .         | G | A | . | PA:CNGB3   | intronic   | NM_.      | .   | .       |
| ACa07 | 8 | #### | rs1030919 | C | T | . | PA:.       | downstr    | NM_.      | .   | .       |
| ACa07 | 8 | #### | rs7559645 | G | A | . | PA:DECR1   | exonic     | NM_.      | mis | DECR1   |
| ACa07 | 8 | #### | .         | G | A | . | PA:DECR1   | exonic     | NM_.      | mis | DECR1   |
| ACa07 | 8 | #### | .         | T | C | . | PA:RUNX1T1 | intronic   | NM_.      | .   | .       |
| ACa07 | 8 | #### | .         | G | A | . | PA:.       | intergen   | NM_dist=. | .   | .       |
| ACa07 | 8 | #### | rs1000299 | T | C | . | PA:.       | intergen   | NR_dist=. | .   | .       |
| ACa07 | 8 | #### | .         | T | A | . | PA:MATN2   | intronic   | NM_.      | .   | .       |
| ACa07 | 8 | #### | .         | G | A | . | PA:.       | upstream   | NR_.      | .   | .       |
| ACa07 | 8 | #### | .         | G | A | . | PA:.       | intergen   | NM_dist=. | .   | .       |
| ACa07 | 8 | #### | .         | C | T | . | PA:OXR1    | UTR5       | NM_NM_.   | .   | .       |
| ACa07 | 8 | #### | .         | C | T | . | PA:KCNV1   | exonic     | NM_.      | mis | KCNV1   |
| ACa07 | 8 | #### | rs1493710 | C | T | . | PA:ATAD2   | exonic     | NM_.      | mis | ATAD2:  |
| ACa07 | 8 | #### | .         | A | G | . | PA:FER1L6  | exonic     | NM_.      | syr | FER1L6  |
| ACa07 | 8 | #### | rs7626895 | C | T | . | PA:.       | intergen   | NM_dist=. | .   | .       |
| ACa07 | 8 | #### | .         | C | T | . | PA:PRNCR1  | ncRNA_NR_. | .         | .   | .       |
| ACa07 | 8 | #### | rs3595615 | G | A | . | PA:LRR6    | exonic     | NM_.      | syr | LRR6:   |
| ACa07 | 8 | #### | rs1689333 | G | A | . | PA:TG      | exonic     | NM_.      | mis | TG:NM_  |
| ACa07 | 8 | #### | .         | G | T | . | PA:KCNK9   | UTR3       | NM_NM_.   | .   | .       |
| ACa07 | 8 | #### | .         | C | T | . | PA:TRAPPC9 | intronic   | NM_.      | .   | .       |
| ACa07 | 8 | #### | .         | C | A | . | PA:DENND3  | exonic     | NM_.      | syr | DENND3  |
| ACa07 | 8 | #### | .         | C | A | . | PA:MROH5   | intronic   | NM_.      | .   | .       |
| ACa07 | 8 | #### | .         | C | T | . | PA:BAI1    | intronic   | NM_.      | .   | .       |
| ACa07 | 8 | #### | .         | G | T | . | PA:LY6H    | intronic   | NM_.      | .   | .       |
| ACa07 | 8 | #### | rs7598006 | C | T | . | PA:ZFP41   | exonic     | NM_.      | mis | ZFP41:  |
| ACa07 | 8 | #### | rs5644139 | G | A | . | PA:FAM83H  | exonic     | NM_.      | syr | FAM83H  |
| ACa07 | 8 | #### | .         | G | T | . | PA:FAM83H  | exonic     | NM_.      | mis | FAM83H  |
| ACa07 | 8 | #### | rs7819090 | C | T | . | PA:SCRIB   | exonic     | NM_.      | mis | SCRIB:  |
| ACa07 | 8 | #### | .         | C | T | . | PA:NRBP2   | exonic     | NM_.      | mis | NRBP2   |
| ACa07 | 8 | #### | .         | G | A | . | PA:EPPK1   | exonic     | NM_.      | mis | EPPK1:  |
| ACa07 | 8 | #### | rs2000607 | G | A | . | PA:PLEC    | exonic     | NM_.      | mis | PLEC:N  |
| ACa07 | 8 | #### | rs5565117 | C | T | . | PA:HSF1    | intronic   | NM_.      | .   | .       |
| ACa07 | 8 | #### | .         | C | T | . | PA:HSF1    | intronic   | NM_.      | .   | .       |
| ACa07 | 8 | #### | .         | G | A | . | PA:CYHR1   | exonic     | NM_.      | mis | CYHR1   |
| ACa07 | 8 | #### | rs7468927 | G | A | . | PA:KIFC2   | exonic     | NM_.      | mis | KIFC2:  |
| ACa07 | 9 | #### | rs7123526 | A | G | . | PA:WASH1   | intronic   | NM_.      | .   | .       |
| ACa07 | 9 | #### | rs8987908 | C | T | . | PA:SLC1A1  | intronic   | NM_.      | .   | .       |
| ACa07 | 9 | #### | .         | C | A | . | PA:MPDZ    | exonic     | NM_.      | mis | MPDZ:   |
| ACa07 | 9 | #### | rs7591887 | G | A | . | PA:NFIB    | intronic   | NM_.      | .   | .       |
| ACa07 | 9 | #### | .         | C | T | . | PA:FREM1   | exonic     | NM_.      | mis | FREM1   |
| ACa07 | 9 | #### | rs7554261 | C | T | . | PA:FREM1   | exonic     | NM_.      | mis | FREM1   |
| ACa07 | 9 | #### | .         | C | T | . | PA:TTC39B  | intronic   | NM_.      | .   | .       |
| ACa07 | 9 | #### | .         | G | A | . | PA:BNC2    | exonic     | NM_.      | mis | BNC2:N  |

|       |   |      |           |   |   |   |              |            |           |     |         |
|-------|---|------|-----------|---|---|---|--------------|------------|-----------|-----|---------|
| ACa07 | 9 | #### | rs7717080 | G | A | . | PA: CNTLN    | exonic     | NM_.      | mis | CNTLN   |
| ACa07 | 9 | #### | .         | G | A | . | PA: SLC24A2  | exonic     | NM_.      | syr | SLC24A2 |
| ACa07 | 9 | #### | rs7552126 | C | T | . | PA: FOCAD    | exonic     | NM_.      | unl | UNKNC   |
| ACa07 | 9 | #### | rs8986502 | G | A | . | PA: PTPLAD2  | intronic   | NM_.      | .   | .       |
| ACa07 | 9 | #### | rs7703822 | C | T | . | PA: NDUFB6   | intronic   | NM_.      | .   | .       |
| ACa07 | 9 | #### | .         | G | A | . | PA: FAM219A  | UTR3       | NM_NM_.   | .   | .       |
| ACa07 | 9 | #### | .         | C | T | . | PA: TESK1    | exonic     | NM_.      | mis | TESK1:  |
| ACa07 | 9 | #### | .         | G | A | . | PA: FBXO10   | exonic     | NM_.      | mis | FBXO10  |
| ACa07 | 9 | #### | .         | G | A | . | PA: FRMPD1   | exonic     | NM_.      | sto | FRMPD   |
| ACa07 | 9 | #### | rs1616872 | A | G | . | PA: CNTNAP3  | intronic   | NM_.      | .   | .       |
| ACa07 | 9 | #### | rs7820531 | G | C | . | PA: CNTNAP3  | exonic     | NM_.      | mis | CNTNA   |
| ACa07 | 9 | #### | rs6255281 | C | T | . | PA:.         | intergen   | NR_dist=. | .   | .       |
| ACa07 | 9 | #### | .         | C | T | . | PA:.         | intergen   | NM_dist=. | .   | .       |
| ACa07 | 9 | #### | rs2003121 | C | T | . | PA:.         | ncRNA_NR_. | .         | .   | .       |
| ACa07 | 9 | #### | rs2016275 | G | A | . | PA:.         | intergen   | NR_dist=. | .   | .       |
| ACa07 | 9 | #### | rs2013763 | G | C | . | PA:.         | intergen   | NM_dist=. | .   | .       |
| ACa07 | 9 | #### | rs3764322 | A | G | . | PA:.         | intergen   | NM_dist=. | .   | .       |
| ACa07 | 9 | #### | .         | A | C | . | PA: LOC64226 | ncRNA_NR_. | .         | .   | .       |
| ACa07 | 9 | #### | .         | G | A | . | PA: FOXD4L5  | exonic     | NM_.      | mis | FOXD4   |
| ACa07 | 9 | #### | rs7506128 | G | A | . | PA: FOXD4L5  | exonic     | NM_.      | mis | FOXD4   |
| ACa07 | 9 | #### | .         | G | T | . | PA:.         | intergen   | NM_dist=. | .   | .       |
| ACa07 | 9 | #### | .         | G | T | . | PA: TMEM2    | exonic     | NM_.      | syr | TMEM2   |
| ACa07 | 9 | #### | .         | C | A | . | PA: NMRK1    | intronic   | NM_.      | .   | .       |
| ACa07 | 9 | #### | rs9660777 | T | C | . | PA: PRUNE2   | intronic   | NM_.      | .   | .       |
| ACa07 | 9 | #### | rs5294239 | G | A | . | PA:.         | intergen   | NR_dist=. | .   | .       |
| ACa07 | 9 | #### | .         | A | G | . | PA:.         | ncRNA_NR_. | .         | .   | .       |
| ACa07 | 9 | #### | rs5696558 | G | A | . | PA: SPATA31  | exonic     | NM_.      | mis | SPATA:  |
| ACa07 | 9 | #### | .         | G | A | . | PA:.         | intergen   | NM_dist=. | .   | .       |
| ACa07 | 9 | #### | rs7749802 | A | G | . | PA: FRMD3    | UTR5       | NM_NM_.   | .   | .       |
| ACa07 | 9 | #### | .         | G | A | . | PA: NTRK2    | intronic   | NM_.      | .   | .       |
| ACa07 | 9 | #### | .         | C | T | . | PA: ZCCHC6   | exonic     | NM_.      | mis | ZCCHC   |
| ACa07 | 9 | #### | rs9367277 | C | T | . | PA: LOC39236 | ncRNA_NR_. | .         | .   | .       |
| ACa07 | 9 | #### | rs1447929 | C | T | . | PA: SHC3     | intronic   | NM_.      | .   | .       |
| ACa07 | 9 | #### | .         | C | T | . | PA: IARS     | intronic   | NM_.      | .   | .       |
| ACa07 | 9 | #### | .         | A | G | . | PA: C9orf89  | intronic   | NM_.      | .   | .       |
| ACa07 | 9 | #### | rs5352400 | G | A | . | PA: WNK2     | exonic     | NM_.      | mis | WNK2:I  |
| ACa07 | 9 | #### | .         | A | G | . | PA: PHF2     | intronic   | NM_.      | .   | .       |
| ACa07 | 9 | #### | .         | A | G | . | PA: PHF2     | UTR3       | NM_NM_.   | .   | .       |
| ACa07 | 9 | #### | .         | C | T | . | PA: ZNF367   | exonic     | NM_.      | mis | ZNF367  |
| ACa07 | 9 | #### | rs5750212 | C | T | . | PA: CDC14B   | intronic   | NM_.      | .   | .       |
| ACa07 | 9 | #### | rs5664919 | C | T | . | PA: ZNF782   | exonic     | NM_.      | mis | ZNF782  |
| ACa07 | 9 | #### | rs5346016 | G | A | . | PA: TBC1D2   | intronic   | NM_.      | .   | .       |
| ACa07 | 9 | #### | rs5275568 | G | A | . | PA: FSD1L    | intronic   | NM_.      | .   | .       |
| ACa07 | 9 | #### | .         | A | G | . | PA: SVEP1    | intronic   | NM_.      | .   | .       |
| ACa07 | 9 | #### | rs9418280 | C | T | . | PA: KIAA1958 | exonic     | NM_.      | mis | KIAA19  |
| ACa07 | 9 | #### | rs7534529 | C | T | . | PA: KIAA1958 | exonic     | NM_.      | mis | KIAA19  |
| ACa07 | 9 | #### | .         | G | T | . | PA:.         | downstr    | NM_.      | .   | .       |
| ACa07 | 9 | #### | .         | G | T | . | PA: ALAD     | intronic   | NM_.      | .   | .       |
| ACa07 | 9 | #### | rs1017044 | C | T | . | PA: COL27A1  | intronic   | NM_.      | .   | .       |
| ACa07 | 9 | #### | .         | C | T | . | PA: COL27A1  | intronic   | NM_.      | .   | .       |
| ACa07 | 9 | #### | rs5296296 | C | T | . | PA: COL27A1  | intronic   | NM_.      | .   | .       |
| ACa07 | 9 | #### | .         | C | A | . | PA: AKNA     | intronic   | NM_.      | .   | .       |
| ACa07 | 9 | #### | rs5393503 | G | A | . | PA: PAPPA    | exonic     | NM_.      | mis | PAPPA   |
| ACa07 | 9 | #### | rs5770416 | C | T | . | PA: CDK5RAF  | intronic   | NM_.      | .   | .       |

|       |    |      |           |   |   |   |            |            |         |     |        |
|-------|----|------|-----------|---|---|---|------------|------------|---------|-----|--------|
| ACa07 | 9  | #### | rs7765588 | C | T | . | PA:PHF19   | intronic   | NM_.    | .   | .      |
| ACa07 | 9  | #### | .         | A | G | . | PA:PHF19   | intronic   | NM_.    | .   | .      |
| ACa07 | 9  | #### | rs7817163 | C | T | . | PA:DAB2IP  | exonic     | NM_.    | syr | DAB2IF |
| ACa07 | 9  | #### | .         | G | T | . | PA:DAB2IP  | exonic     | NM_.    | mis | DAB2IF |
| ACa07 | 9  | #### | .         | C | A | . | PA:STRBP   | intronic   | NM_.    | .   | .      |
| ACa07 | 9  | #### | rs7671231 | C | T | . | PA:NEK6    | intronic   | NM_.    | .   | .      |
| ACa07 | 9  | #### | .         | T | C | . | PA:MAPKAP1 | intronic   | NM_.    | .   | .      |
| ACa07 | 9  | #### | .         | C | T | . | PA:RALGPS1 | intronic   | NM_.    | .   | .      |
| ACa07 | 9  | #### | rs7704105 | C | T | . | PA:LRSAM1  | exonic     | NM_.    | syr | LRSAM  |
| ACa07 | 9  | #### | rs7514371 | G | A | . | PA:STXBP1  | exonic     | NM_.    | mis | STXBP  |
| ACa07 | 9  | #### | .         | C | A | . | PA:TTC16   | intronic   | NM_.    | .   | .      |
| ACa07 | 9  | #### | rs7724303 | C | T | . | PA:FPGS    | exonic     | NM_.    | mis | FPGS:M |
| ACa07 | 9  | #### | rs3755590 | C | T | . | PA:ENG     | intronic   | NM_.    | .   | .      |
| ACa07 | 9  | #### | rs7704197 | C | T | . | PA:ODF2    | exonic     | NM_.    | syr | ODF2:M |
| ACa07 | 9  | #### | rs3700623 | G | A | . | PA:SPTAN1  | exonic     | NM_.    | mis | SPTAN  |
| ACa07 | 9  | #### | rs1020109 | C | T | . | PA:SPTAN1  | exonic     | NM_.    | mis | SPTAN  |
| ACa07 | 9  | #### | .         | T | C | . | PA:SPTAN1  | intronic   | NM_.    | .   | .      |
| ACa07 | 9  | #### | .         | C | T | . | PA:SPTAN1  | intronic   | NM_.    | .   | .      |
| ACa07 | 9  | #### | rs1200306 | C | T | . | PA:ZER1    | intronic   | NM_.    | .   | .      |
| ACa07 | 9  | #### | rs4837317 | T | C | . | PA:CCBL1   | intronic   | NM_.    | .   | .      |
| ACa07 | 9  | #### | rs4837318 | C | T | . | PA:CCBL1   | intronic   | NM_.    | .   | .      |
| ACa07 | 9  | #### | rs7690702 | G | A | . | PA:DOLPP1  | exonic     | NM_.    | mis | DOLPP  |
| ACa07 | 9  | #### | .         | G | A | . | PA:CRAT    | intronic   | NM_.    | .   | .      |
| ACa07 | 9  | #### | .         | G | A | . | PA:CRAT    | exonic     | NM_.    | mis | CRAT:M |
| ACa07 | 9  | #### | rs9375934 | C | T | . | PA:RAPGEF1 | exonic     | NM_.    | syr | RAPGE  |
| ACa07 | 9  | #### | .         | C | T | . | PA:NTNG2   | intronic   | NM_.    | .   | .      |
| ACa07 | 9  | #### | .         | C | T | . | PA:SETX    | exonic     | NM_.    | mis | SETX:M |
| ACa07 | 9  | #### | rs4498679 | G | A | . | PA:DDX31   | intronic   | NM_.    | .   | .      |
| ACa07 | 9  | #### | .         | G | A | . | PA:GTF3C5  | UTR5       | NM_NM_. | .   | .      |
| ACa07 | 9  | #### | .         | C | T | . | PA:RALGDS  | exonic     | NM_.    | mis | RALGD  |
| ACa07 | 9  | #### | .         | A | G | . | PA:GBGT1   | exonic     | NM_.    | mis | GBGT1  |
| ACa07 | 9  | #### | .         | G | T | . | PA:SURF4   | intronic   | NM_.    | .   | .      |
| ACa07 | 9  | #### | rs7823594 | G | A | . | PA:STKLD1  | exonic     | NM_.    | mis | STKLD  |
| ACa07 | 9  | #### | rs7806069 | C | T | . | PA:TMEM8C  | exonic     | NM_.    | mis | TMEM8  |
| ACa07 | 9  | #### | .         | G | T | . | PA:DBH     | exonic     | NM_.    | mis | DBH:M  |
| ACa07 | 9  | #### | .         | C | T | . | PA:COL5A1  | exonic     | NM_.    | mis | COL5A  |
| ACa07 | 9  | #### | rs6173790 | C | T | . | PA:COL5A1  | exonic     | NM_.    | syr | COL5A  |
| ACa07 | 9  | #### | .         | G | A | . | PA:COL5A1  | intronic   | NM_.    | .   | .      |
| ACa07 | 9  | #### | rs7478355 | C | T | . | PA:CAMSAP1 | exonic     | NM_.    | mis | CAMSA  |
| ACa07 | 9  | #### | .         | C | A | . | PA:GPSM1   | intronic   | NM_.    | .   | .      |
| ACa07 | 9  | #### | rs9942197 | C | T | . | PA:NOTCH1  | intronic   | NM_.    | .   | .      |
| ACa07 | 9  | #### | .         | C | A | . | PA:NOTCH1  | exonic     | NM_.    | mis | NOTCH  |
| ACa07 | 9  | #### | .         | C | T | . | PA:NOTCH1  | intronic   | NM_.    | .   | .      |
| ACa07 | 9  | #### | .         | G | A | . | PA:FAM69B  | exonic     | NM_.    | mis | FAM69I |
| ACa07 | 9  | #### | .         | T | C | . | PA:CCDC183 | ncRNA_NR_. | .       | .   | .      |
| ACa07 | 9  | #### | rs1399152 | C | T | . | PA:TRAF2   | exonic     | NM_.    | syr | TRAF2: |
| ACa07 | 9  | #### | rs5651517 | C | T | . | PA:MAN1B1  | intronic   | NM_.    | .   | .      |
| ACa07 | 9  | #### | rs7788028 | G | A | . | PA:SLC34A3 | intronic   | NM_.    | .   | .      |
| ACa07 | 9  | #### | .         | C | A | . | PA:FAM166A | exonic     | NM_.    | mis | FAM166 |
| ACa07 | 9  | #### | rs7776402 | G | A | . | PA:TOR4A   | exonic     | NM_.    | syr | TOR4A  |
| ACa07 | 9  | #### | rs1126228 | C | T | . | PA:PNPLA7  | intronic   | NM_.    | .   | .      |
| ACa07 | 9  | #### | .         | G | A | . | PA:EHMT1   | intronic   | NM_.    | .   | .      |
| ACa07 | 9  | #### | rs3707879 | C | T | . | PA:TUBBP5  | ncRNA_NR_. | .       | .   | .      |
| ACa07 | 10 | #### | rs7547454 | C | T | . | PA:GTPBP4  | intronic   | NM_.    | .   | .      |

|       |    |      |           |   |   |   |             |           |          |     |         |
|-------|----|------|-----------|---|---|---|-------------|-----------|----------|-----|---------|
| ACa07 | 10 | #### | .         | C | A | . | PA:ADARB2   | intronic  | NM_      | .   | .       |
| ACa07 | 10 | #### | rs5680149 | C | T | . | PA:PITRM1   | intronic  | NM_      | .   | .       |
| ACa07 | 10 | #### | .         | A | T | . | PA:ANKRD16  | intronic  | NM_      | .   | .       |
| ACa07 | 10 | #### | rs2019140 | G | A | . | PA:SFMBT2   | exonic    | NM_      | mis | SFMBT   |
| ACa07 | 10 | #### | rs7961144 | G | A | . | PA:ITIH5    | intronic  | NM_      | .   | .       |
| ACa07 | 10 | #### | rs3708927 | C | T | . | PA:ITIH5    | exonic    | NM_      | mis | ITIH5:N |
| ACa07 | 10 | #### | .         | C | A | . | PA:TAF3     | intronic  | NM_      | .   | .       |
| ACa07 | 10 | #### | .         | G | A | . | PA:TAF3     | intronic  | NM_      | .   | .       |
| ACa07 | 10 | #### | .         | C | A | . | PA:.        | intergen  | NR_dist= | .   | .       |
| ACa07 | 10 | #### | .         | C | A | . | PA:.        | upstream  | NM_      | .   | .       |
| ACa07 | 10 | #### | rs1919845 | C | T | . | PA:.        | intergen  | NM_dist= | .   | .       |
| ACa07 | 10 | #### | rs7658069 | G | A | . | PA:CUBN     | intronic  | NM_      | .   | .       |
| ACa07 | 10 | #### | .         | G | T | . | PA:CUBN     | exonic    | NM_      | mis | CUBN:†  |
| ACa07 | 10 | #### | .         | C | T | . | PA:PLXDC2   | intronic  | NM_      | .   | .       |
| ACa07 | 10 | #### | rs9652901 | T | C | . | PA:DNAJC1   | intronic  | NM_      | .   | .       |
| ACa07 | 10 | #### | .         | A | T | . | PA:KIAA1217 | exonic    | NM_      | mis | KIAA12  |
| ACa07 | 10 | #### | rs7647799 | T | C | . | PA:ARHGAP2  | exonic    | NM_      | mis | ARHGA   |
| ACa07 | 10 | #### | rs1999030 | A | G | . | PA:ARHGAP2  | intronic  | NM_      | .   | .       |
| ACa07 | 10 | #### | .         | A | G | . | PA:MYO3A    | exonic    | NM_      | mis | MYO3A   |
| ACa07 | 10 | #### | .         | A | G | . | PA:APBB1IP  | intronic  | NM_      | .   | .       |
| ACa07 | 10 | #### | rs3678495 | G | A | . | PA:ANKRD26  | exonic    | NM_      | mis | ANKRD   |
| ACa07 | 10 | #### | .         | G | T | . | PA:ANKRD26  | intronic  | NM_      | .   | .       |
| ACa07 | 10 | #### | .         | G | A | . | PA:LRRRC37A | ncRNA_NR_ | .        | .   | .       |
| ACa07 | 10 | #### | rs7766630 | G | A | . | PA:SVIL     | intronic  | NM_      | .   | .       |
| ACa07 | 10 | #### | rs5733337 | C | T | . | PA:LYZL2    | intronic  | NM_      | .   | .       |
| ACa07 | 10 | #### | .         | G | A | . | PA:CCNY     | exonic    | NM_      | mis | CCNY:†  |
| ACa07 | 10 | #### | .         | G | A | . | PA:HNRNPA3  | ncRNA_NR_ | .        | .   | .       |
| ACa07 | 10 | #### | .         | G | A | . | PA:.        | intergen  | NM_dist= | .   | .       |
| ACa07 | 10 | #### | .         | A | G | . | PA:.        | intergen  | NM_dist= | .   | .       |
| ACa07 | 10 | #### | .         | C | T | . | PA:.        | intergen  | NR_dist= | .   | .       |
| ACa07 | 10 | #### | .         | G | A | . | PA:BMS1P5   | ncRNA_NR_ | .        | .   | .       |
| ACa07 | 10 | #### | .         | G | A | . | PA:WDFY4    | intronic  | NM_      | .   | .       |
| ACa07 | 10 | #### | rs9040575 | G | A | . | PA:WDFY4    | exonic    | NM_      | mis | WDFY4   |
| ACa07 | 10 | #### | rs3745238 | G | A | . | PA:CHAT     | exonic    | NM_      | syr | CHAT:†  |
| ACa07 | 10 | #### | .         | C | A | . | PA:.        | intergen  | NR_dist= | .   | .       |
| ACa07 | 10 | #### | rs7512474 | G | A | . | PA:PCDH15   | intronic  | NM_      | .   | .       |
| ACa07 | 10 | #### | .         | C | A | . | PA:.        | intergen  | NM_dist= | .   | .       |
| ACa07 | 10 | #### | rs1389134 | G | A | . | PA:FAM13C   | exonic    | NM_      | mis | FAM13C  |
| ACa07 | 10 | #### | rs5737945 | A | G | . | PA:CCDC6    | intronic  | NM_      | .   | .       |
| ACa07 | 10 | #### | .         | G | A | . | PA:PBLD     | intronic  | NM_      | .   | .       |
| ACa07 | 10 | #### | .         | A | G | . | PA:SUPV3L1  | intronic  | NM_      | .   | .       |
| ACa07 | 10 | #### | rs7548920 | C | T | . | PA:COL13A1  | exonic    | NM_      | syr | COL13A1 |
| ACa07 | 10 | #### | .         | C | T | . | PA:AIFM2    | exonic    | NM_      | mis | AIFM2:† |
| ACa07 | 10 | #### | rs3744653 | G | A | . | PA:PRF1     | intronic  | NM_      | .   | .       |
| ACa07 | 10 | #### | rs2017279 | C | T | . | PA:CDH23    | exonic    | NM_      | mis | CDH23   |
| ACa07 | 10 | #### | .         | C | A | . | PA:P4HA1    | exonic    | NM_      | mis | P4HA1:† |
| ACa07 | 10 | #### | .         | C | A | . | PA:FAM149B  | intronic  | NM_      | .   | .       |
| ACa07 | 10 | #### | rs7759506 | A | G | . | PA:PPP3CB   | intronic  | NM_      | .   | .       |
| ACa07 | 10 | #### | rs7802380 | A | G | . | PA:AGAP5    | intronic  | NM_      | .   | .       |
| ACa07 | 10 | #### | rs8789174 | A | G | . | PA:BMS1P4   | ncRNA_NR_ | .        | .   | .       |
| ACa07 | 10 | #### | .         | C | T | . | PA:BMS1P4   | ncRNA_NR_ | .        | .   | .       |
| ACa07 | 10 | #### | .         | A | G | . | PA:KCNMA1   | ncRNA_NR_ | .        | .   | .       |
| ACa07 | 10 | #### | .         | A | G | . | PA:SFTPD    | intronic  | NM_      | .   | .       |
| ACa07 | 10 | #### | rs5681324 | C | T | . | PA:SH2D4B   | exonic    | NM_      | mis | SH2D4B  |



|       |    |      |           |   |   |   |             |            |           |     |         |
|-------|----|------|-----------|---|---|---|-------------|------------|-----------|-----|---------|
| ACa07 | 10 | #### | .         | C | T | . | PA:CDHR1    | intronic   | NM_.      | .   | .       |
| ACa07 | 10 | #### | .         | C | T | . | PA:LRIT1    | exonic     | NM_.      | syr | LRIT1:1 |
| ACa07 | 10 | #### | .         | C | T | . | PA:GRID1    | intronic   | NM_.      | .   | .       |
| ACa07 | 10 | #### | rs5296587 | C | T | . | PA:.        | intergen   | NR_dist=. | .   | .       |
| ACa07 | 10 | #### | .         | G | A | . | PA:.        | upstream   | NM_.      | .   | .       |
| ACa07 | 10 | #### | rs3696055 | G | A | . | PA:MYOF     | exonic     | NM_.      | sto | MYOF:1  |
| ACa07 | 10 | #### | rs7535868 | G | A | . | PA:CEP55    | exonic     | NM_.      | mis | CEP55:  |
| ACa07 | 10 | #### | .         | G | T | . | PA:CYP2C8   | intronic   | NM_.      | .   | .       |
| ACa07 | 10 | #### | rs9047130 | T | G | . | PA:ENTPD1-1 | ncRNA_NR_. | .         | .   | .       |
| ACa07 | 10 | #### | rs7826084 | C | T | . | PA:BLNK     | exonic;s   | NM_NM_.   | mis | BLNK:N  |
| ACa07 | 10 | #### | .         | G | A | . | PA:.        | intergen   | NM_dist=. | .   | .       |
| ACa07 | 10 | #### | rs3769880 | G | A | . | PA:ZFYVE27  | intronic   | NM_.      | .   | .       |
| ACa07 | 10 | #### | rs9945308 | C | T | . | PA:CRTAC1   | intronic   | NM_.      | .   | .       |
| ACa07 | 10 | #### | rs5392081 | G | A | . | PA:HPSE2    | exonic     | NM_.      | mis | HPSE2:  |
| ACa07 | 10 | #### | rs3692674 | C | T | . | PA:CUTC     | exonic     | NM_.      | mis | CUTC:1  |
| ACa07 | 10 | #### | rs9441434 | C | T | . | PA:SEC31B   | intronic   | NM_.      | .   | .       |
| ACa07 | 10 | #### | .         | G | A | . | PA:PPRC1    | exonic     | NM_.      | mis | PPRC1   |
| ACa07 | 10 | #### | .         | A | G | . | PA:PSD      | intronic   | NM_.      | .   | .       |
| ACa07 | 10 | #### | .         | C | T | . | PA:TRIM8    | intronic   | NM_.      | .   | .       |
| ACa07 | 10 | #### | .         | C | A | . | PA:COL17A1  | intronic   | NM_.      | .   | .       |
| ACa07 | 10 | #### | .         | G | A | . | PA:CFAP58   | intronic   | NM_.      | .   | .       |
| ACa07 | 10 | #### | .         | T | G | . | PA:SORCS3   | intronic   | NM_.      | .   | .       |
| ACa07 | 10 | #### | .         | C | T | . | PA:GFRA1    | intronic   | NM_.      | .   | .       |
| ACa07 | 10 | #### | .         | C | T | . | PA:PDZD8    | exonic     | NM_.      | mis | PDZD8:  |
| ACa07 | 10 | #### | .         | T | A | . | PA:TIAL1    | intronic   | NM_.      | .   | .       |
| ACa07 | 10 | #### | .         | A | G | . | PA:BTBD16   | intronic   | NM_.      | .   | .       |
| ACa07 | 10 | #### | rs7503782 | G | A | . | PA:FAM175B  | exonic     | NM_.      | syr | FAM175: |
| ACa07 | 10 | #### | .         | C | T | . | PA:DOCK1    | exonic     | NM_.      | unl | UNKNC   |
| ACa07 | 10 | #### | rs3765225 | C | T | . | PA:DOCK1    | intronic   | NM_.      | .   | .       |
| ACa07 | 10 | #### | .         | C | T | . | PA:FOXI2    | exonic     | NM_.      | mis | FOXI2:1 |
| ACa07 | 10 | #### | rs5455183 | G | A | . | PA:PPP2R2D  | intronic   | NM_.      | .   | .       |
| ACa07 | 10 | #### | .         | G | T | . | PA:NKX6-2   | exonic     | NM_.      | syr | NKX6-2  |
| ACa07 | 10 | #### | .         | C | T | . | PA:CFAP46   | intronic   | NM_.      | .   | .       |
| ACa07 | 10 | #### | rs5396027 | C | T | . | PA:CFAP46   | intronic   | NM_.      | .   | .       |
| ACa07 | 10 | #### | .         | G | T | . | PA:PRAP1    | exonic     | NM_.      | mis | PRAP1:  |
| ACa07 | 10 | #### | .         | G | A | . | PA:PAOX     | exonic     | NM_.      | syr | PAOX:1  |
| ACa07 | 10 | #### | rs7793478 | G | A | . | PA:PAOX     | intronic   | NM_.      | .   | .       |
| ACa07 | 10 | #### | .         | G | A | . | PA:PAOX     | intronic   | NM_.      | .   | .       |
| ACa07 | 10 | #### | .         | T | C | . | PA:MTG1     | intronic   | NM_.      | .   | .       |
| ACa07 | 11 | #### | .         | G | T | . | PA:LINC0100 | ncRNA_NR_. | .         | .   | .       |
| ACa07 | 11 | #### | rs2003509 | C | A | . | PA:.        | upstream   | NM_.      | .   | .       |
| ACa07 | 11 | #### | .         | G | T | . | PA:PSMD13   | intronic   | NM_.      | .   | .       |
| ACa07 | 11 | #### | rs1008718 | G | A | . | PA:RNH1     | intronic   | NM_.      | .   | .       |
| ACa07 | 11 | #### | rs7793525 | C | T | . | PA:LRRC56   | intronic   | NM_.      | .   | .       |
| ACa07 | 11 | #### | rs3741463 | G | A | . | PA:LMNTD2   | exonic     | NM_.      | mis | LMNTD   |
| ACa07 | 11 | #### | .         | A | G | . | PA:PHRF1    | exonic     | NM_.      | mis | PHRF1:  |
| ACa07 | 11 | #### | .         | G | T | . | PA:SLC25A22 | intronic   | NM_.      | .   | .       |
| ACa07 | 11 | #### | rs8960121 | G | A | . | PA:AP2A2    | intronic   | NM_.      | .   | .       |
| ACa07 | 11 | #### | rs7582346 | G | A | . | PA:.        | intergen   | NM_dist=. | .   | .       |
| ACa07 | 11 | #### | rs7514641 | G | A | . | PA:MUC5B    | intronic   | NM_.      | .   | .       |
| ACa07 | 11 | #### | .         | T | C | . | PA:MUC5B    | intronic   | NM_.      | .   | .       |
| ACa07 | 11 | #### | .         | G | A | . | PA:MUC5B    | exonic     | NM_.      | syr | MUC5B   |
| ACa07 | 11 | #### | .         | C | T | . | PA:MUC5B    | exonic     | NM_.      | mis | MUC5B   |
| ACa07 | 11 | #### | rs3689865 | C | T | . | PA:MUC5B    | exonic     | NM_.      | syr | MUC5B   |

|       |    |      |           |   |   |   |             |          |          |     |         |
|-------|----|------|-----------|---|---|---|-------------|----------|----------|-----|---------|
| ACa07 | 11 | #### | .         | A | G | . | PA:TH       | intronic | NM_      | .   | .       |
| ACa07 | 11 | #### | rs1019902 | C | T | . | PA:.        | downstr  | NR_      | .   | .       |
| ACa07 | 11 | #### | rs7724812 | G | A | . | PA:CD81     | intronic | NM_      | .   | .       |
| ACa07 | 11 | #### | .         | G | T | . | PA:TRPM5    | intronic | NM_      | .   | .       |
| ACa07 | 11 | #### | .         | G | A | . | PA:TRPM5    | intronic | NM_      | .   | .       |
| ACa07 | 11 | #### | rs5592355 | T | C | . | PA:.        | intergen | NR_dist= | .   | .       |
| ACa07 | 11 | #### | .         | T | C | . | PA:OR52B4   | exonic   | NM_      | mis | OR52B:  |
| ACa07 | 11 | #### | .         | G | A | . | PA:.        | intergen | NM_dist= | .   | .       |
| ACa07 | 11 | #### | rs8669468 | C | T | . | PA:TRIM6-TR | intronic | NM_      | .   | .       |
| ACa07 | 11 | #### | .         | G | A | . | PA:PRKCDBF  | UTR3     | NM_NM_   | .   | .       |
| ACa07 | 11 | #### | rs7289628 | C | T | . | PA:APBB1    | intronic | NM_      | .   | .       |
| ACa07 | 11 | #### | .         | G | A | . | PA:DCHS1    | exonic   | NM_      | sto | DCHS1   |
| ACa07 | 11 | #### | .         | C | T | . | PA:DCHS1    | exonic   | NM_      | mis | DCHS1   |
| ACa07 | 11 | #### | rs7595225 | C | T | . | PA:MICALCL  | exonic   | NM_      | mis | MICALC  |
| ACa07 | 11 | #### | rs7811107 | C | T | . | PA:ARNTL    | exonic   | NM_      | unl | UNKNC   |
| ACa07 | 11 | #### | .         | G | A | . | PA:SPON1    | exonic   | NM_      | unl | UNKNC   |
| ACa07 | 11 | #### | rs7824579 | C | T | . | PA:RRAS2    | exonic   | NM_      | mis | RRAS2   |
| ACa07 | 11 | #### | .         | C | A | . | PA:PDE3B    | exonic   | NM_      | mis | PDE3B:  |
| ACa07 | 11 | #### | .         | G | A | . | PA:CYP2R1   | intronic | NM_      | .   | .       |
| ACa07 | 11 | #### | .         | G | A | . | PA:PLEKHA7  | intronic | NM_      | .   | .       |
| ACa07 | 11 | #### | rs7785451 | G | A | . | PA:PLEKHA7  | exonic   | NM_      | mis | PLEKH:  |
| ACa07 | 11 | #### | .         | G | A | . | PA:OTOG     | exonic   | NM_      | mis | OTOG:I  |
| ACa07 | 11 | #### | .         | G | T | . | PA:TPH1     | exonic   | NM_      | syr | TPH1:N  |
| ACa07 | 11 | #### | .         | C | T | . | PA:.        | intergen | NM_dist= | .   | .       |
| ACa07 | 11 | #### | .         | G | T | . | PA:SAA1     | intronic | NM_      | .   | .       |
| ACa07 | 11 | #### | .         | C | A | . | PA:LDHA     | intronic | NM_      | .   | .       |
| ACa07 | 11 | #### | .         | A | C | . | PA:SLC6A5   | intronic | NM_      | .   | .       |
| ACa07 | 11 | #### | rs1146385 | G | A | . | PA:NELL1    | exonic   | NM_      | mis | NELL1:  |
| ACa07 | 11 | #### | .         | A | G | . | PA:GAS2     | exonic   | NM_      | mis | GAS2:N  |
| ACa07 | 11 | #### | .         | A | T | . | PA:.        | intergen | NM_dist= | .   | .       |
| ACa07 | 11 | #### | .         | C | A | . | PA:CD59     | intronic | NM_      | .   | .       |
| ACa07 | 11 | #### | .         | C | T | . | PA:ABTB2    | intronic | NM_      | .   | .       |
| ACa07 | 11 | #### | .         | C | T | . | PA:HSD17B1: | exonic   | NM_      | mis | HSD17I  |
| ACa07 | 11 | #### | .         | G | A | . | PA:ZNF408   | exonic   | NM_      | mis | ZNF40E  |
| ACa07 | 11 | #### | .         | G | A | . | PA:CKAP5    | exonic   | NM_      | sto | CKAP5:  |
| ACa07 | 11 | #### | rs7731977 | C | T | . | PA:ARFGAP2  | intronic | NM_      | .   | .       |
| ACa07 | 11 | #### | .         | T | C | . | PA:OR4A15   | exonic   | NM_      | mis | OR4A1:  |
| ACa07 | 11 | #### | rs7783566 | T | C | . | PA:.        | upstrear | NM_      | .   | .       |
| ACa07 | 11 | #### | .         | T | G | . | PA:SMTNL1   | exonic   | NM_      | mis | SMTNL   |
| ACa07 | 11 | #### | rs7556226 | G | A | . | PA:OR1S1    | exonic   | NM_      | mis | OR1S1:  |
| ACa07 | 11 | #### | rs3705153 | C | T | . | PA:OR10Q1   | exonic   | NM_      | mis | OR10Q   |
| ACa07 | 11 | #### | rs7461600 | C | T | . | PA:PATL1    | intronic | NM_      | .   | .       |
| ACa07 | 11 | #### | rs7613895 | G | A | . | PA:PPP1R32  | exonic   | NM_      | mis | PPP1R:  |
| ACa07 | 11 | #### | .         | C | A | . | PA:PPP1R32  | intronic | NM_      | .   | .       |
| ACa07 | 11 | #### | .         | G | T | . | PA:FADS1    | exonic   | NM_      | syr | FADS1:  |
| ACa07 | 11 | #### | rs7506613 | G | A | . | PA:AHNAK    | exonic   | NM_      | syr | AHNAK   |
| ACa07 | 11 | #### | rs3688014 | C | T | . | PA:MTA2     | exonic   | NM_      | mis | MTA2:N  |
| ACa07 | 11 | #### | rs3734262 | C | T | . | PA:INTS5    | exonic   | NM_      | mis | INTS5:I |
| ACa07 | 11 | #### | .         | T | G | . | PA:NXF1     | UTR3     | NM_NM_   | .   | .       |
| ACa07 | 11 | #### | rs7551956 | C | T | . | PA:NAA40    | exonic   | NM_      | mis | NAA40:  |
| ACa07 | 11 | #### | rs320149  | G | A | . | PA:OTUB1    | intronic | NM_      | .   | .       |
| ACa07 | 11 | #### | .         | T | A | . | PA:BAD      | intronic | NM_      | .   | .       |
| ACa07 | 11 | #### | rs7694797 | C | T | . | PA:PYGM     | exonic   | NM_      | mis | PYGM:I  |
| ACa07 | 11 | #### | rs7599871 | G | A | . | PA:SYVN1    | exonic   | NM_      | syr | SYVN1:  |

|       |    |      |           |   |   |   |             |            |           |     |         |
|-------|----|------|-----------|---|---|---|-------------|------------|-----------|-----|---------|
| ACa07 | 11 | #### | rs2009796 | C | T | . | PA:SPDYC    | intronic   | NM_.      | .   | .       |
| ACa07 | 11 | #### | .         | G | A | . | PA:POLA2    | intronic   | NM_.      | .   | .       |
| ACa07 | 11 | #### | .         | G | A | . | PA:KCNK7    | exonic     | NM_.      | mi  | KCNK7   |
| ACa07 | 11 | #### | .         | G | A | . | PA:MAP3K11  | exonic     | NM_.      | syr | MAP3K   |
| ACa07 | 11 | #### | rs3731576 | G | A | . | PA:PCNXL3   | exonic     | NM_.      | mi  | PCNXL   |
| ACa07 | 11 | #### | .         | G | A | . | PA:SIPA1    | exonic     | NM_.      | mi  | SIPA1:f |
| ACa07 | 11 | #### | .         | T | G | . | PA:SIPA1    | intronic   | NM_.      | .   | .       |
| ACa07 | 11 | #### | .         | G | A | . | PA:RNASEH2  | intronic   | NM_.      | .   | .       |
| ACa07 | 11 | #### | .         | C | T | . | PA:GAL3ST3  | exonic     | NM_.      | syr | GAL3S   |
| ACa07 | 11 | #### | .         | C | T | . | PA:KLC2     | intronic   | NM_.      | .   | .       |
| ACa07 | 11 | #### | .         | C | T | . | PA:CD248    | exonic     | NM_.      | mi  | CD248:  |
| ACa07 | 11 | #### | .         | T | C | . | PA:BRMS1    | exonic     | NM_.      | mi  | BRMS1   |
| ACa07 | 11 | #### | .         | G | A | . | PA:PPP1CA   | intronic   | NM_.      | .   | .       |
| ACa07 | 11 | #### | rs8917540 | C | T | . | PA:NDUFV1   | intronic   | NM_.      | .   | .       |
| ACa07 | 11 | #### | rs1432324 | C | T | . | PA:TCIRG1   | exonic     | NM_.      | syr | TCIRG   |
| ACa07 | 11 | #### | rs7621382 | C | T | . | PA:TPCN2    | exonic     | NM_.      | mi  | TPCN2   |
| ACa07 | 11 | #### | .         | G | A | . | PA:TPCN2    | intronic   | NM_.      | .   | .       |
| ACa07 | 11 | #### | .         | A | G | . | PA:PPFIA1   | intronic   | NM_.      | .   | .       |
| ACa07 | 11 | #### | rs7726393 | C | T | . | PA:DHCR7    | exonic     | NM_.      | mi  | DHCR7   |
| ACa07 | 11 | #### | rs1917587 | G | A | . | PA:LRTOMT   | UTR3       | NM_NM_.   | .   | .       |
| ACa07 | 11 | #### | .         | G | C | . | PA:FOLR2    | intronic   | NM_.      | .   | .       |
| ACa07 | 11 | #### | .         | C | A | . | PA:CLPB     | intronic   | NM_.      | .   | .       |
| ACa07 | 11 | #### | .         | A | G | . | PA:CLPB     | intronic   | NM_.      | .   | .       |
| ACa07 | 11 | #### | .         | C | A | . | PA:ARAP1    | UTR3       | NM_NM_.   | .   | .       |
| ACa07 | 11 | #### | .         | T | C | . | PA:FCHSD2   | intronic   | NM_.      | .   | .       |
| ACa07 | 11 | #### | .         | G | A | . | PA:PPME1    | UTR3       | NM_NM_.   | .   | .       |
| ACa07 | 11 | #### | .         | C | T | . | PA:NEU3     | intronic   | NM_.      | .   | .       |
| ACa07 | 11 | #### | rs7806415 | G | A | . | PA:SLCO2B1  | exonic     | NM_.      | mi  | SLCO2   |
| ACa07 | 11 | #### | rs7805688 | G | A | . | PA:MAP6     | exonic     | NM_.      | mi  | MAP6:N  |
| ACa07 | 11 | #### | rs7453149 | C | T | . | PA:UVRAG    | intronic   | NM_.      | .   | .       |
| ACa07 | 11 | #### | .         | G | A | . | PA:USP35    | intronic   | NM_.      | .   | .       |
| ACa07 | 11 | #### | rs3722049 | G | C | . | PA:.        | intergen   | NM_dist=. | .   | .       |
| ACa07 | 11 | #### | .         | G | A | . | PA:DLG2     | intronic   | NM_.      | .   | .       |
| ACa07 | 11 | #### | .         | G | A | . | PA:GRM5     | exonic     | NM_.      | mi  | GRM5:f  |
| ACa07 | 11 | #### | .         | G | A | . | PA:FOLH1B   | intronic   | NM_.      | .   | .       |
| ACa07 | 11 | #### | rs7912478 | G | A | . | PA:CCDC67   | intronic   | NM_.      | .   | .       |
| ACa07 | 11 | #### | rs1913813 | G | A | . | PA:DYNC2H1  | exonic     | NM_.      | mi  | DYNC2   |
| ACa07 | 11 | #### | rs7548668 | G | A | . | PA:GUCY1A2  | intronic   | NM_.      | .   | .       |
| ACa07 | 11 | #### | rs7639430 | C | T | . | PA:ELMOD1   | exonic     | NM_.      | mi  | ELMOD   |
| ACa07 | 11 | #### | .         | A | G | . | PA:CUL5     | intronic   | NM_.      | .   | .       |
| ACa07 | 11 | #### | .         | T | C | . | PA:ACAT1    | exonic     | NM_.      | syr | ACAT1:  |
| ACa07 | 11 | #### | .         | A | G | . | PA:ATM      | intronic   | NM_.      | .   | .       |
| ACa07 | 11 | #### | rs5746434 | C | T | . | PA:C11orf53 | UTR3       | NM_NM_.   | .   | .       |
| ACa07 | 11 | #### | rs1042921 | G | A | . | PA:COLCA1   | ncRNA_NR_. | .         | .   | .       |
| ACa07 | 11 | #### | rs9738553 | C | T | . | PA:SIK2     | intronic   | NM_.      | .   | .       |
| ACa07 | 11 | #### | rs7711773 | G | A | . | PA:ZW10     | exonic     | NM_.      | syr | ZW10:N  |
| ACa07 | 11 | #### | rs7553780 | T | G | . | PA:CADM1    | intronic   | NM_.      | .   | .       |
| ACa07 | 11 | #### | .         | C | T | . | PA:SIK3     | exonic     | NM_.      | syr | SIK3:NI |
| ACa07 | 11 | #### | rs3706451 | C | A | . | PA:TMPRSS1  | exonic     | NM_.      | syr | TMPRS   |
| ACa07 | 11 | #### | .         | C | T | . | PA:SCN2B    | exonic     | NM_.      | mi  | SCN2B   |
| ACa07 | 11 | #### | .         | G | T | . | PA:MPZL3    | intronic   | NM_.      | .   | .       |
| ACa07 | 11 | #### | .         | C | A | . | PA:ARCN1    | intronic   | NM_.      | .   | .       |
| ACa07 | 11 | #### | .         | G | A | . | PA:DDX6     | exonic     | NM_.      | syr | DDX6:N  |
| ACa07 | 11 | #### | rs5761141 | T | C | . | PA:ARHGEF1  | exonic     | NM_.      | syr | ARHGE   |

|       |    |      |           |   |   |   |              |            |            |     |          |
|-------|----|------|-----------|---|---|---|--------------|------------|------------|-----|----------|
| ACa07 | 11 | #### | .         | C | A | . | PA: ARHGEF1  | exonic     | NM_.       | mi  | ARHGE    |
| ACa07 | 11 | #### | rs1424863 | C | T | . | PA: TECTA    | exonic     | NM_.       | mi  | TECTA    |
| ACa07 | 11 | #### | rs1464053 | C | T | . | PA: OR10G7   | exonic     | NM_.       | mi  | OR10G    |
| ACa07 | 11 | #### | rs1866274 | C | T | . | PA: OR8G2    | exonic     | NM_.       | unl | UNKNC    |
| ACa07 | 11 | #### | .         | C | A | . | PA: ROBO4    | intronic   | NM_.       | .   | .        |
| ACa07 | 11 | #### | .         | C | T | . | PA: PKNOX2   | exonic     | NM_.       | mi  | PKNOX    |
| ACa07 | 11 | #### | rs1036245 | G | A | . | PA: FOXRED1  | exonic     | NM_.       | mi  | FOXRE    |
| ACa07 | 11 | #### | rs1499597 | C | T | . | PA: TP53AIP1 | intronic   | NM_.       | .   | .        |
| ACa07 | 11 | #### | rs1160026 | G | T | . | PA: PRDM10   | exonic     | NM_.       | syr | PRDM1    |
| ACa07 | 11 | #### | rs7501981 | G | A | . | PA: ADAMTS1  | exonic     | NM_.       | mi  | ADAMT    |
| ACa07 | 11 | #### | .         | G | T | . | PA: OPCML    | exonic     | NM_.       | mi  | OPCML    |
| ACa07 | 11 | #### | rs9612999 | G | A | . | PA: .        | intergen   | NM_dist=.  | .   | .        |
| ACa07 | 11 | #### | .         | G | A | . | PA: GLB1L3   | intronic   | NM_.       | .   | .        |
| ACa07 | 12 | #### | rs1492134 | C | T | . | PA: CCDC77   | intronic   | NM_.       | .   | .        |
| ACa07 | 12 | #### | .         | G | A | . | PA: .        | upstream   | NM_.       | .   | .        |
| ACa07 | 12 | #### | rs7477402 | G | A | . | PA: B4GALNT  | exonic     | NM_.       | mi  | B4GALI   |
| ACa07 | 12 | #### | .         | G | T | . | PA: WNK1     | intronic   | NM_.       | .   | .        |
| ACa07 | 12 | #### | .         | C | T | . | PA: CACNA1C  | exonic     | NM_.       | syr | CACNA    |
| ACa07 | 12 | #### | rs2020589 | C | T | . | PA: CACNA1C  | exonic     | NM_.       | syr | CACNA    |
| ACa07 | 12 | #### | rs1044570 | G | A | . | PA: CACNA1C  | intronic   | NM_.       | .   | .        |
| ACa07 | 12 | #### | .         | C | T | . | PA: CRACR2A  | intronic   | NM_.       | .   | .        |
| ACa07 | 12 | #### | .         | C | A | . | PA: CCND2    | intronic   | NM_.       | .   | .        |
| ACa07 | 12 | #### | .         | G | T | . | PA: RAD51AP  | UTR5       | NM_NM_.    | .   | .        |
| ACa07 | 12 | #### | .         | A | G | . | PA: KCNA6    | exonic     | NM_.       | mi  | KCNA6    |
| ACa07 | 12 | #### | .         | G | A | . | PA: TNFRSF1  | exonic     | NM_.       | mi  | TNFRS    |
| ACa07 | 12 | #### | rs7522876 | C | T | . | PA: ZNF384   | intronic   | NM_.       | .   | .        |
| ACa07 | 12 | #### | .         | C | T | . | PA: CD4      | intronic   | NM_.       | .   | .        |
| ACa07 | 12 | #### | .         | C | A | . | PA: CLSTN3   | intronic   | NM_.       | .   | .        |
| ACa07 | 12 | #### | .         | T | C | . | PA: CD163    | splicing   | NM_NM_.    | .   | .        |
| ACa07 | 12 | #### | .         | T | A | . | PA: CLEC6A   | exonic     | NM_.       | mi  | CLEC6A   |
| ACa07 | 12 | #### | .         | G | A | . | PA: MFAP5    | exonic     | NM_.       | unl | UNKNC    |
| ACa07 | 12 | #### | .         | A | G | . | PA: .        | intergen   | NR_dist=.  | .   | .        |
| ACa07 | 12 | #### | rs7607645 | T | C | . | PA: .        | intergen   | NR_dist=.  | .   | .        |
| ACa07 | 12 | #### | .         | C | A | . | PA: CLEC12A  | intronic   | NM_.       | .   | .        |
| ACa07 | 12 | #### | .         | G | A | . | PA: PRH1-PR1 | ncRNA_NR_. | .          | .   | .        |
| ACa07 | 12 | #### | .         | C | A | . | PA: ETV6     | intronic   | NM_.       | .   | .        |
| ACa07 | 12 | #### | rs7520863 | C | T | . | PA: LOH12CR  | exonic     | NM_.       | unl | UNKNC    |
| ACa07 | 12 | #### | .         | T | C | . | PA: LOH12CR  | exonic     | NM_.       | unl | UNKNC    |
| ACa07 | 12 | #### | rs7558438 | C | T | . | PA: RPL13AP1 | ncRNA_NR_. | .          | .   | .        |
| ACa07 | 12 | #### | .         | C | T | . | PA: PIK3C2G  | exonic     | NM_.       | mi  | PIK3C2   |
| ACa07 | 12 | #### | .         | G | T | . | PA: PIK3C2G  | exonic     | NM_.       | sto | PIK3C2   |
| ACa07 | 12 | #### | rs9411424 | A | C | . | PA: .        | intergen   | NM_dist=.  | .   | .        |
| ACa07 | 12 | #### | .         | A | G | . | PA: SLCO1B1  | exonic     | NM_.       | mi  | SLCO1B1  |
| ACa07 | 12 | #### | .         | A | G | . | PA: PPFIBP1  | exonic     | NM_.       | syr | PPFIBP1  |
| ACa07 | 12 | #### | .         | C | T | . | PA: ERGIC2   | UTR3       | NM_NM_.    | .   | .        |
| ACa07 | 12 | #### | rs3715564 | C | T | . | PA: TSPAN11  | intronic   | NM_.       | .   | .        |
| ACa07 | 12 | #### | .         | C | T | . | PA: TSPAN11  | UTR3       | NM_NM_.    | .   | .        |
| ACa07 | 12 | #### | .         | G | A | . | PA: .        | intergen   | NM_dist=.  | .   | .        |
| ACa07 | 12 | #### | .         | C | T | . | PA: .        | intergen   | NOI_dist=. | .   | .        |
| ACa07 | 12 | #### | .         | C | T | . | PA: MUC19    | intronic   | NM_.       | .   | .        |
| ACa07 | 12 | #### | .         | C | T | . | PA: MUC19    | intronic   | NM_.       | .   | .        |
| ACa07 | 12 | #### | .         | A | T | . | PA: PUS7L    | intronic   | NM_.       | .   | .        |
| ACa07 | 12 | #### | .         | A | C | . | PA: C12orf54 | exonic     | NM_.       | mi  | C12orf54 |
| ACa07 | 12 | #### | .         | C | T | . | PA: ADCY6    | intronic   | NM_.       | .   | .        |

|       |    |      |           |   |   |   |             |          |           |     |          |
|-------|----|------|-----------|---|---|---|-------------|----------|-----------|-----|----------|
| ACa07 | 12 | #### | .         | T | C | . | PA:TROAP    | exonic   | NM_.      | mis | TROAP    |
| ACa07 | 12 | #### | rs5557374 | G | A | . | PA:PRPF40B  | intronic | NM_.      | .   | .        |
| ACa07 | 12 | #### | rs7778437 | G | A | . | PA:PRPF40B  | exonic   | NM_.      | mis | PRPF40   |
| ACa07 | 12 | #### | .         | A | G | . | PA:NCKAP5L  | intronic | NM_.      | .   | .        |
| ACa07 | 12 | #### | rs7903986 | G | A | . | PA:ASIC1    | intronic | NM_.      | .   | .        |
| ACa07 | 12 | #### | .         | G | A | . | PA:LARP4    | intronic | NM_.      | .   | .        |
| ACa07 | 12 | #### | .         | T | C | . | PA:TFCP2    | exonic   | NM_.      | mis | TFCP2:   |
| ACa07 | 12 | #### | .         | A | G | . | PA:C12orf80 | exonic   | NM_.      | mis | C12orf80 |
| ACa07 | 12 | #### | .         | G | T | . | PA:KRT71    | UTR5     | NM_NM_.   | .   | .        |
| ACa07 | 12 | #### | rs3777629 | C | T | . | PA:KRT73    | exonic   | NM_.      | syr | KRT73:   |
| ACa07 | 12 | #### | rs5301800 | G | A | . | PA:KRT2     | exonic   | NM_.      | mis | KRT2:N   |
| ACa07 | 12 | #### | .         | C | T | . | PA:KRT4     | exonic   | NM_.      | syr | KRT4:N   |
| ACa07 | 12 | #### | .         | G | A | . | PA:SPRYD3   | intronic | NM_.      | .   | .        |
| ACa07 | 12 | #### | .         | C | T | . | PA:ITGB7    | intronic | NM_.      | .   | .        |
| ACa07 | 12 | #### | rs9039120 | G | A | . | PA:MAP3K12  | intronic | NM_.      | .   | .        |
| ACa07 | 12 | #### | .         | G | T | . | PA:HOXC4    | intronic | NM_.      | .   | .        |
| ACa07 | 12 | #### | rs3688610 | C | T | . | PA:ANKRD52  | exonic   | NM_.      | mis | ANKRD    |
| ACa07 | 12 | #### | rs7688629 | C | T | . | PA:MYO1A    | exonic   | NM_.      | mis | MYO1A    |
| ACa07 | 12 | #### | rs1929543 | T | A | . | PA:TMEM194  | intronic | NM_.      | .   | .        |
| ACa07 | 12 | #### | rs9453696 | G | C | . | PA:LRP1     | intronic | NM_.      | .   | .        |
| ACa07 | 12 | #### | .         | G | A | . | PA:LRP1     | exonic   | NM_.      | mis | LRP1:N   |
| ACa07 | 12 | #### | rs3702872 | G | A | . | PA:LRP1     | intronic | NM_.      | .   | .        |
| ACa07 | 12 | #### | .         | T | C | . | PA:LRP1     | intronic | NM_.      | .   | .        |
| ACa07 | 12 | #### | rs5363943 | G | A | . | PA:SHMT2    | exonic   | NM_.      | mis | SHMT2    |
| ACa07 | 12 | #### | .         | T | G | . | PA:DPY19L2  | exonic   | NM_.      | mis | DPY19L   |
| ACa07 | 12 | #### | rs1809265 | C | T | . | PA:XPOT     | exonic   | NM_.      | syr | XPOT:N   |
| ACa07 | 12 | #### | .         | A | G | . | PA:XPOT     | exonic   | NM_.      | mis | XPOT:N   |
| ACa07 | 12 | #### | .         | A | G | . | PA:YEATS4   | exonic   | NM_.      | unl | UNKNC    |
| ACa07 | 12 | #### | .         | G | A | . | PA:CCT2     | UTR3     | NM_NM_.   | .   | .        |
| ACa07 | 12 | #### | rs5319845 | C | T | . | PA:BEST3    | UTR3     | NM_NM_.   | .   | .        |
| ACa07 | 12 | #### | .         | A | C | . | PA:TMEM19   | exonic   | NM_.      | mis | TMEM1    |
| ACa07 | 12 | #### | rs3675929 | C | T | . | PA:OSBPL8   | exonic   | NM_.      | mis | OSBPL    |
| ACa07 | 12 | #### | .         | G | T | . | PA:CSR2     | intronic | NM_.      | .   | .        |
| ACa07 | 12 | #### | .         | C | A | . | PA:NAV3     | exonic   | NM_.      | mis | NAV3:N   |
| ACa07 | 12 | #### | .         | G | T | . | PA:NAV3     | exonic   | NM_.      | mis | NAV3:N   |
| ACa07 | 12 | #### | rs7672581 | C | T | . | PA:OTOGL    | exonic   | NM_.      | syr | OTOGL    |
| ACa07 | 12 | #### | rs9382701 | A | G | . | PA:OTOGL    | intronic | NM_.      | .   | .        |
| ACa07 | 12 | #### | .         | G | T | . | PA:METTL25  | exonic   | NM_.      | mis | METTL    |
| ACa07 | 12 | #### | .         | C | T | . | PA:.        | intergen | NM_dist=. | .   | .        |
| ACa07 | 12 | #### | .         | G | A | . | PA:USP44    | intronic | NM_.      | .   | .        |
| ACa07 | 12 | #### | rs5750458 | G | A | . | PA:CDK17    | exonic   | NM_.      | mis | CDK17:   |
| ACa07 | 12 | #### | rs1491955 | G | A | . | PA:.        | intergen | NM_dist=. | .   | .        |
| ACa07 | 12 | #### | .         | T | C | . | PA:.        | intergen | NM_dist=. | .   | .        |
| ACa07 | 12 | #### | rs7594794 | C | T | . | PA:NR1H4    | exonic   | NM_.      | mis | NR1H4:   |
| ACa07 | 12 | #### | .         | C | T | . | PA:ANO4     | intronic | NM_.      | .   | .        |
| ACa07 | 12 | #### | .         | A | G | . | PA:ARL1     | intronic | NM_.      | .   | .        |
| ACa07 | 12 | #### | .         | G | T | . | PA:MYBPC1   | intronic | NM_.      | .   | .        |
| ACa07 | 12 | #### | .         | G | T | . | PA:STAB2    | exonic   | NM_.      | mis | STAB2:   |
| ACa07 | 12 | #### | .         | G | A | . | PA:TDG      | intronic | NM_.      | .   | .        |
| ACa07 | 12 | #### | .         | C | T | . | PA:WSCD2    | intronic | NM_.      | .   | .        |
| ACa07 | 12 | #### | .         | C | T | . | PA:SART3    | exonic   | NM_.      | mis | SART3:   |
| ACa07 | 12 | #### | .         | T | C | . | PA:ALKBH2   | intronic | NM_.      | .   | .        |
| ACa07 | 12 | #### | .         | C | T | . | PA:MYO1H    | intronic | NM_.      | .   | .        |
| ACa07 | 12 | #### | .         | G | T | . | PA:.        | intergen | NM_dist=. | .   | .        |

|       |    |      |           |   |   |   |             |            |           |            |
|-------|----|------|-----------|---|---|---|-------------|------------|-----------|------------|
| ACa07 | 12 | #### | .         | C | A | . | PA:BRAP     | UTR5       | NM_NM_.   | .          |
| ACa07 | 12 | #### | rs3699442 | G | A | . | PA:HECTD4   | exonic     | NM_.      | syr HECTD  |
| ACa07 | 12 | #### | rs7648934 | C | T | . | PA:MED13L   | intronic   | NM_.      | .          |
| ACa07 | 12 | #### | .         | T | G | . | PA:NOS1     | intronic   | NM_.      | .          |
| ACa07 | 12 | #### | .         | A | G | . | PA:TAOK3    | intronic   | NM_.      | .          |
| ACa07 | 12 | #### | .         | G | T | . | PA:TMEM233  | UTR3       | NM_NM_.   | .          |
| ACa07 | 12 | #### | rs9094398 | C | T | . | PA:MLEC     | UTR5       | NM_NM_.   | .          |
| ACa07 | 12 | #### | rs7629138 | C | T | . | PA:SPPL3    | UTR3       | NM_NM_.   | .          |
| ACa07 | 12 | #### | .         | A | T | . | PA:OASL     | exonic     | NM_.      | mis OASL:M |
| ACa07 | 12 | #### | rs1000013 | G | A | . | PA:P2RX4    | intronic   | NM_.      | .          |
| ACa07 | 12 | #### | .         | C | T | . | PA:KDM2B    | intronic   | NM_.      | .          |
| ACa07 | 12 | #### | .         | G | T | . | PA:CLIP1    | intronic   | NM_.      | .          |
| ACa07 | 12 | #### | .         | G | A | . | PA:KNTC1    | intronic   | NM_.      | .          |
| ACa07 | 12 | #### | rs5485859 | G | A | . | PA:HIP1R    | intronic   | NM_.      | .          |
| ACa07 | 12 | #### | .         | C | A | . | PA:SBNO1    | intronic   | NM_.      | .          |
| ACa07 | 12 | #### | .         | G | A | . | PA:SBNO1    | intronic   | NM_.      | .          |
| ACa07 | 12 | #### | .         | T | C | . | PA:SETD8    | intronic   | NM_.      | .          |
| ACa07 | 12 | #### | rs3682772 | C | T | . | PA:DNAH10   | intronic   | NM_.      | .          |
| ACa07 | 12 | #### | .         | T | C | . | PA:DNAH10   | exonic     | NM_.      | syr DNAH1  |
| ACa07 | 12 | #### | rs1861196 | G | A | . | PA:DNAH10   | intronic   | NM_.      | .          |
| ACa07 | 12 | #### | .         | T | G | . | PA:TMEM132  | intronic   | NM_.      | .          |
| ACa07 | 12 | #### | .         | C | T | . | PA:.        | intergen   | NR_dist=. | .          |
| ACa07 | 12 | #### | rs7758291 | C | T | . | PA:TMEM132  | exonic     | NM_.      | syr TMEM1  |
| ACa07 | 12 | #### | rs8685914 | G | A | . | PA:GLT1D1   | intronic   | NM_.      | .          |
| ACa07 | 12 | #### | .         | G | T | . | PA:EP400    | intronic   | NM_.      | .          |
| ACa07 | 12 | #### | .         | T | C | . | PA:DDX51    | intronic   | NM_.      | .          |
| ACa07 | 12 | #### | .         | C | T | . | PA:GALNT9   | intronic   | NM_.      | .          |
| ACa07 | 12 | #### | .         | C | T | . | PA:CHFR     | exonic     | NM_.      | mis CHFR:M |
| ACa07 | 13 | #### | .         | C | T | . | PA:PSPC1    | exonic     | NM_.      | syr PSPC1: |
| ACa07 | 13 | #### | .         | G | T | . | PA:ZMYM2    | exonic     | NM_.      | mis ZMYM2  |
| ACa07 | 13 | #### | rs7650516 | G | A | . | PA:ZDHHC20  | exonic     | NM_.      | mis ZDHHC  |
| ACa07 | 13 | #### | .         | G | A | . | PA:SGCG     | exonic     | NM_.      | syr SGCG:l |
| ACa07 | 13 | #### | rs7609687 | G | A | . | PA:WASF3    | UTR3       | NM_NM_.   | .          |
| ACa07 | 13 | #### | .         | T | C | . | PA:POMP     | UTR5       | NM_NM_.   | .          |
| ACa07 | 13 | #### | .         | G | T | . | PA:FRY      | exonic     | NM_.      | mis FRY:NM |
| ACa07 | 13 | #### | .         | T | G | . | PA:RFC3     | intronic   | NM_.      | .          |
| ACa07 | 13 | #### | .         | C | T | . | PA:MIR548F5 | ncRNA_NR_. | .         | .          |
| ACa07 | 13 | #### | .         | C | T | . | PA:CCDC169  | exonic     | NM_.      | mis CCDC1  |
| ACa07 | 13 | #### | .         | T | C | . | PA:SMAD9    | exonic     | NM_.      | mis SMAD9  |
| ACa07 | 13 | #### | rs1133145 | C | T | . | PA:MTRF1    | exonic     | NM_.      | mis MTRF1  |
| ACa07 | 13 | #### | rs9269682 | G | A | . | PA:.        | intergen   | NM_dist=. | .          |
| ACa07 | 13 | #### | .         | G | A | . | PA:ERICH6B  | intronic   | NM_.      | .          |
| ACa07 | 13 | #### | rs5302300 | C | T | . | PA:ERICH6B  | intronic   | NM_.      | .          |
| ACa07 | 13 | #### | rs7755432 | C | T | . | PA:ESD      | intronic   | NM_.      | .          |
| ACa07 | 13 | #### | rs5354767 | C | T | . | PA:.        | intergen   | NR_dist=. | .          |
| ACa07 | 13 | #### | .         | A | C | . | PA:DACH1    | intronic   | NM_.      | .          |
| ACa07 | 13 | #### | .         | G | A | . | PA:TBC1D4   | intronic   | NM_.      | .          |
| ACa07 | 13 | #### | rs5371791 | C | T | . | PA:.        | downstr    | NR_.      | .          |
| ACa07 | 13 | #### | .         | C | T | . | PA:DZIP1    | intronic   | NM_.      | .          |
| ACa07 | 13 | #### | rs1492005 | G | A | . | PA:MBNL2    | exonic     | NM_.      | mis MBNL2  |
| ACa07 | 13 | #### | rs3733851 | G | A | . | PA:TM9SF2   | exonic     | NM_.      | syr TM9SF: |
| ACa07 | 13 | #### | rs3731740 | C | T | . | PA:PCCA     | intronic   | NM_.      | .          |
| ACa07 | 13 | #### | .         | T | C | . | PA:ABHD13   | exonic     | NM_.      | mis ABHD1: |
| ACa07 | 13 | #### | rs7567578 | G | A | . | PA:MYO16    | exonic     | NM_.      | mis MYO16  |

|       |    |      |           |   |   |   |              |            |           |     |        |
|-------|----|------|-----------|---|---|---|--------------|------------|-----------|-----|--------|
| ACa07 | 13 | #### | rs1488011 | G | A | . | PA:COL4A1    | exonic     | NM_.      | mis | COL4A  |
| ACa07 | 13 | #### | rs7563035 | G | A | . | PA:CARS2     | exonic     | NM_.      | syr | CARS2  |
| ACa07 | 13 | #### | .         | G | A | . | PA:.         | upstream   | NM_.      | .   | .      |
| ACa07 | 13 | #### | rs1000744 | C | T | . | PA:ANKRD10   | UTR3       | NM_NM_.   | .   | .      |
| ACa07 | 13 | #### | rs7522048 | G | A | . | PA:.         | intergen   | NM_dist=. | .   | .      |
| ACa07 | 13 | #### | rs7502995 | G | A | . | PA:MCF2L     | exonic     | NM_.      | mis | MCF2L  |
| ACa07 | 13 | #### | rs7709821 | C | T | . | PA:GAS6      | exonic     | NM_.      | mis | GAS6   |
| ACa07 | 14 | #### | rs8791117 | C | T | . | PA:.         | intergen   | NR_dist=. | .   | .      |
| ACa07 | 14 | #### | .         | G | T | . | PA:.         | intergen   | NR_dist=. | .   | .      |
| ACa07 | 14 | #### | rs7445485 | C | T | . | PA:.         | intergen   | NR_dist=. | .   | .      |
| ACa07 | 14 | #### | .         | A | G | . | PA:.         | intergen   | NM_dist=. | .   | .      |
| ACa07 | 14 | #### | rs1453568 | C | A | . | PA:TEP1      | exonic     | NM_.      | mis | TEP1   |
| ACa07 | 14 | #### | rs5497679 | C | T | . | PA:KLHL33    | exonic     | NM_.      | mis | KLHL33 |
| ACa07 | 14 | #### | .         | C | T | . | PA:SUPT16H   | intronic   | NM_.      | .   | .      |
| ACa07 | 14 | #### | .         | T | C | . | PA:.         | intergen   | NM_dist=. | .   | .      |
| ACa07 | 14 | #### | rs3745810 | G | A | . | PA:SLC7A7    | intronic   | NM_.      | .   | .      |
| ACa07 | 14 | #### | rs7576169 | G | A | . | PA:HAUS4     | exonic     | NM_.      | syr | HAUS4  |
| ACa07 | 14 | #### | .         | A | G | . | PA:LOC10272  | ncRNA_NR_. | .         | .   | .      |
| ACa07 | 14 | #### | rs7777607 | G | A | . | PA:LOC10192  | ncRNA_NR_. | .         | .   | .      |
| ACa07 | 14 | #### | rs9241538 | C | T | . | PA:LOC10192  | ncRNA_NR_. | .         | .   | .      |
| ACa07 | 14 | #### | .         | T | A | . | PA:RALGAPA   | ncRNA_NR_. | .         | .   | .      |
| ACa07 | 14 | #### | .         | C | A | . | PA:RALGAPA   | exonic     | NM_.      | mis | RALGA  |
| ACa07 | 14 | #### | .         | C | A | . | PA:PTCSC3    | ncRNA_NR_. | .         | .   | .      |
| ACa07 | 14 | #### | rs5673369 | G | A | . | PA:.         | intergen   | NM_dist=. | .   | .      |
| ACa07 | 14 | #### | .         | C | T | . | PA:.         | intergen   | NM_dist=. | .   | .      |
| ACa07 | 14 | #### | rs8659367 | G | A | . | PA:LRFN5     | exonic     | NM_.      | mis | LRFN5  |
| ACa07 | 14 | #### | .         | T | C | . | PA:FANCM     | splicing   | NM_NM_.   | .   | .      |
| ACa07 | 14 | #### | .         | G | T | . | PA:C14orf182 | intronic   | NM_.      | .   | .      |
| ACa07 | 14 | #### | .         | G | T | . | PA:.         | upstream   | NM_.      | .   | .      |
| ACa07 | 14 | #### | rs7462395 | G | A | . | PA:PTGER2    | exonic     | NM_.      | syr | PTGER  |
| ACa07 | 14 | #### | .         | A | T | . | PA:ACTR10    | intronic   | NM_.      | .   | .      |
| ACa07 | 14 | #### | .         | T | C | . | PA:DAAM1     | intronic   | NM_.      | .   | .      |
| ACa07 | 14 | #### | .         | G | T | . | PA:DAAM1     | exonic     | NM_.      | mis | DAAM1  |
| ACa07 | 14 | #### | .         | T | C | . | PA:L3HYPDH   | intronic   | NM_.      | .   | .      |
| ACa07 | 14 | #### | rs1401803 | C | T | . | PA:DHRS7     | exonic     | NM_.      | syr | DHRS7  |
| ACa07 | 14 | #### | .         | A | G | . | PA:.         | intergen   | NM_dist=. | .   | .      |
| ACa07 | 14 | #### | rs5401543 | C | T | . | PA:MTHFD1    | exonic     | NM_.      | mis | MTHFD  |
| ACa07 | 14 | #### | rs1404421 | C | T | . | PA:.         | intergen   | NM_dist=. | .   | .      |
| ACa07 | 14 | #### | .         | A | G | . | PA:GPHN      | intronic   | NM_.      | .   | .      |
| ACa07 | 14 | #### | .         | C | T | . | PA:ACTN1     | intronic   | NM_.      | .   | .      |
| ACa07 | 14 | #### | .         | C | T | . | PA:ELMSAN1   | intronic   | NM_.      | .   | .      |
| ACa07 | 14 | #### | rs7545827 | C | T | . | PA:ZNF410    | exonic     | NM_.      | mis | ZNF410 |
| ACa07 | 14 | #### | rs3764591 | C | T | . | PA:ZNF410    | intronic   | NM_.      | .   | .      |
| ACa07 | 14 | #### | .         | A | G | . | PA:LTBP2     | exonic     | NM_.      | mis | LTBP2  |
| ACa07 | 14 | #### | .         | C | T | . | PA:YLPM1     | intronic   | NM_.      | .   | .      |
| ACa07 | 14 | #### | .         | G | T | . | PA:PROX2     | UTR3       | NM_NM_.   | .   | .      |
| ACa07 | 14 | #### | rs1413435 | G | A | . | PA:RPS6KL1   | exonic     | NM_.      | syr | RPS6KL |
| ACa07 | 14 | #### | .         | C | A | . | PA:TDP1      | intronic   | NM_.      | .   | .      |
| ACa07 | 14 | #### | .         | G | T | . | PA:NRDE2     | intronic   | NM_.      | .   | .      |
| ACa07 | 14 | #### | rs7511076 | G | A | . | PA:TTC7B     | exonic     | NM_.      | sto | TTC7B  |
| ACa07 | 14 | #### | rs7632995 | G | A | . | PA:GPR68     | UTR5       | NM_NM_.   | .   | .      |
| ACa07 | 14 | #### | .         | G | A | . | PA:CCDC88C   | intronic   | NM_.      | .   | .      |
| ACa07 | 14 | #### | .         | G | A | . | PA:LINC0052  | ncRNA_NR_. | .         | .   | .      |
| ACa07 | 14 | #### | .         | C | T | . | PA:IFI27     | intronic   | NM_.      | .   | .      |

|       |    |      |           |   |   |   |             |            |           |     |        |
|-------|----|------|-----------|---|---|---|-------------|------------|-----------|-----|--------|
| ACa07 | 14 | #### | .         | G | A | . | PA:DICER1   | intronic   | NM_.      | .   | .      |
| ACa07 | 14 | #### | .         | A | G | . | PA:BCL11B   | exonic     | NM_.      | mi  | BCL11E |
| ACa07 | 14 | #### | .         | G | T | . | PA:BCL11B   | exonic     | NM_.      | mi  | BCL11E |
| ACa07 | 14 | #### | .         | C | T | . | PA:DLK1     | exonic     | NM_.      | syr | DLK1:N |
| ACa07 | 14 | #### | .         | T | C | . | PA:MIR411   | ncRNA_NR_. | .         | .   |        |
| ACa07 | 14 | #### | .         | G | A | . | PA:MIR381H  | ncRNA_NR_. | .         | .   |        |
| ACa07 | 14 | #### | rs7571156 | G | A | . | PA:MOK      | exonic     | NM_.      | syr | MOK:N  |
| ACa07 | 14 | #### | rs9721368 | C | T | . | PA:CDC42BP  | intronic   | NM_.      | .   | .      |
| ACa07 | 14 | #### | rs1043142 | C | T | . | PA:TRMT61A  | intronic   | NM_.      | .   | .      |
| ACa07 | 14 | #### | .         | C | T | . | PA:KIF26A   | exonic     | NM_.      | mi  | KIF26A |
| ACa07 | 14 | #### | .         | G | T | . | PA:TMEM179  | exonic     | NM_.      | mi  | TMEM1  |
| ACa07 | 14 | #### | .         | C | T | . | PA:SIVA1    | intronic   | NM_.      | .   | .      |
| ACa07 | 14 | #### | rs7564163 | C | T | . | PA:AKT1     | intronic   | NM_.      | .   | .      |
| ACa07 | 14 | #### | .         | G | T | . | PA:CEP170B  | intronic   | NM_.      | .   | .      |
| ACa07 | 14 | #### | rs7689001 | G | A | . | PA:JAG2     | intronic   | NM_.      | .   | .      |
| ACa07 | 14 | #### | .         | C | A | . | PA:BRF1     | intronic   | NM_.      | .   | .      |
| ACa07 | 14 | #### | rs7822187 | G | A | . | PA:PACS2    | exonic     | NM_.      | mi  | PACS2  |
| ACa07 | 14 | #### | rs7820214 | C | T | . | PA:.        | intergen   | NR_dist=. | .   | .      |
| ACa07 | 14 | #### | .         | G | A | . | PA:ADAM6    | ncRNA_NR_. | .         | .   |        |
| ACa07 | 14 | #### | .         | C | T | . | PA:.        | intergen   | NR_dist=. | .   | .      |
| ACa07 | 15 | #### | rs2005484 | G | A | . | PA:.        | intergen   | NR_dist=. | .   | .      |
| ACa07 | 15 | #### | .         | C | T | . | PA:POTEB,P  | intronic   | NM_.      | .   | .      |
| ACa07 | 15 | #### | .         | A | G | . | PA:.        | intergen   | NR_dist=. | .   | .      |
| ACa07 | 15 | #### | .         | A | G | . | PA:LOC10192 | ncRNA_NR_. | .         | .   |        |
| ACa07 | 15 | #### | .         | C | T | . | PA:CYFIP1   | intronic   | NM_.      | .   | .      |
| ACa07 | 15 | #### | .         | G | A | . | PA:LOC28368 | ncRNA_NR_. | .         | .   |        |
| ACa07 | 15 | #### | .         | G | A | . | PA:.        | intronic   | NM_.      | .   | .      |
| ACa07 | 15 | #### | .         | C | T | . | PA:.        | intronic   | NM_.      | .   | .      |
| ACa07 | 15 | #### | rs7605191 | G | A | . | PA:.        | intergen   | NR_dist=. | .   | .      |
| ACa07 | 15 | #### | rs9195421 | G | A | . | PA:.        | downstr    | NR_.      | .   | .      |
| ACa07 | 15 | #### | .         | G | A | . | PA:.        | downstr    | NR_.      | .   | .      |
| ACa07 | 15 | #### | rs7485099 | T | C | . | PA:.        | upstream   | NR_.      | .   | .      |
| ACa07 | 15 | #### | .         | A | G | . | PA:.        | downstr    | NR_.      | .   | .      |
| ACa07 | 15 | #### | rs9209119 | G | A | . | PA:ATP10A   | intronic   | NM_.      | .   | .      |
| ACa07 | 15 | #### | rs3718584 | C | T | . | PA:HERC2    | splicing   | NM_NM_.   | .   | .      |
| ACa07 | 15 | #### | .         | A | G | . | PA:HERC2    | exonic     | NM_.      | mi  | HERC2  |
| ACa07 | 15 | #### | rs2021672 | C | T | . | PA:GOLGA8M  | exonic     | NM_.      | syr | GOLGA  |
| ACa07 | 15 | #### | .         | G | T | . | PA:FAM189A  | intronic   | NM_.      | .   | .      |
| ACa07 | 15 | #### | .         | G | A | . | PA:GOLGA8J  | exonic     | NM_.      | mi  | GOLGA  |
| ACa07 | 15 | #### | .         | C | T | . | PA:CHRFAM7  | intronic   | NM_.      | .   | .      |
| ACa07 | 15 | #### | rs1995696 | A | G | . | PA:.        | intergen   | NM_dist=. | .   | .      |
| ACa07 | 15 | #### | .         | T | C | . | PA:ULK4P1,U | ncRNA_NR_. | .         | .   |        |
| ACa07 | 15 | #### | .         | C | T | . | PA:OTUD7A   | exonic     | NM_.      | syr | OTUD7  |
| ACa07 | 15 | #### | rs1127716 | A | T | . | PA:.        | intergen   | NM_dist=. | .   | .      |
| ACa07 | 15 | #### | .         | C | T | . | PA:RYS3     | intronic   | NM_.      | .   | .      |
| ACa07 | 15 | #### | .         | G | A | . | PA:.        | intergen   | NM_dist=. | .   | .      |
| ACa07 | 15 | #### | .         | G | A | . | PA:PAK6     | exonic     | NM_.      | mi  | PAK6:N |
| ACa07 | 15 | #### | .         | G | T | . | PA:PLCB2    | intronic   | NM_.      | .   | .      |
| ACa07 | 15 | #### | rs3704110 | C | T | . | PA:SPTBN5   | intronic   | NM_.      | .   | .      |
| ACa07 | 15 | #### | .         | G | A | . | PA:SPTBN5   | intronic   | NM_.      | .   | .      |
| ACa07 | 15 | #### | rs5310947 | G | A | . | PA:TTBK2    | exonic     | NM_.      | syr | TTBK2: |
| ACa07 | 15 | #### | rs7551745 | C | T | . | PA:TUBGCP4  | exonic     | NM_.      | sto | TUBGC  |
| ACa07 | 15 | #### | rs5360360 | C | T | . | PA:CKMT1B   | exonic     | NM_.      | sto | CKMT1  |
| ACa07 | 15 | #### | .         | G | A | . | PA:STRC     | intronic   | NM_.      | .   | .      |



|       |    |      |           |   |   |   |             |            |           |            |
|-------|----|------|-----------|---|---|---|-------------|------------|-----------|------------|
| ACa07 | 15 | #### | rs5322560 | G | A | . | PA:.        | intergen   | NM_dist=. | .          |
| ACa07 | 15 | #### | .         | G | A | . | PA:SORD     | intronic   | NM_.      | .          |
| ACa07 | 15 | #### | .         | G | T | . | PA:DUOX1    | exonic     | NM_.      | mis DUOX1  |
| ACa07 | 15 | #### | .         | A | G | . | PA:SEMA6D   | intronic   | NM_.      | .          |
| ACa07 | 15 | #### | rs7737859 | G | A | . | PA:FBN1     | exonic     | NM_.      | mis FBN1:N |
| ACa07 | 15 | #### | rs1409544 | C | T | . | PA:FBN1     | exonic     | NM_.      | mis FBN1:N |
| ACa07 | 15 | #### | .         | G | T | . | PA:.        | intergen   | NM_dist=. | .          |
| ACa07 | 15 | #### | .         | A | G | . | PA:FAM227B  | intronic   | NM_.      | .          |
| ACa07 | 15 | #### | .         | G | T | . | PA:ATP8B4   | intronic   | NM_.      | .          |
| ACa07 | 15 | #### | .         | A | G | . | PA:USP50    | splicing   | NM_NM_.   | .          |
| ACa07 | 15 | #### | rs3686733 | G | A | . | PA:MYO5C    | exonic     | NM_.      | syr MYO5C  |
| ACa07 | 15 | #### | .         | G | T | . | PA:MYO5A    | intronic   | NM_.      | .          |
| ACa07 | 15 | #### | .         | T | C | . | PA:AQP9     | exonic     | NM_.      | mis AQP9:N |
| ACa07 | 15 | #### | rs7793599 | G | A | . | PA:TLN2     | exonic     | NM_.      | mis TLN2:N |
| ACa07 | 15 | #### | rs7518805 | C | T | . | PA:MTFMT    | exonic     | NM_.      | mis MTFMT  |
| ACa07 | 15 | #### | .         | C | G | . | PA:IGDCC4   | exonic     | NM_.      | mis IGDCC4 |
| ACa07 | 15 | #### | rs5369412 | C | T | . | PA:IGDCC4   | exonic     | NM_.      | syr IGDCC4 |
| ACa07 | 15 | #### | .         | G | A | . | PA:MEGF11   | intronic   | NM_.      | .          |
| ACa07 | 15 | #### | .         | T | C | . | PA:.        | intergen   | NM_dist=. | .          |
| ACa07 | 15 | #### | .         | T | C | . | PA:IQCH     | intronic   | NM_.      | .          |
| ACa07 | 15 | #### | rs7568129 | C | T | . | PA:CLN6     | intronic   | NM_.      | .          |
| ACa07 | 15 | #### | .         | C | T | . | PA:ITGA11   | intronic   | NM_.      | .          |
| ACa07 | 15 | #### | rs5460720 | C | T | . | PA:THSD4    | intronic   | NM_.      | .          |
| ACa07 | 15 | #### | .         | C | A | . | PA:THSD4    | intronic   | NM_.      | .          |
| ACa07 | 15 | #### | .         | G | A | . | PA:CELF6    | exonic     | NM_.      | mis CELF6: |
| ACa07 | 15 | #### | rs1043159 | C | A | . | PA:BBS4     | intronic   | NM_.      | .          |
| ACa07 | 15 | #### | .         | G | A | . | PA:CYP11A1  | intronic   | NM_.      | .          |
| ACa07 | 15 | #### | .         | C | T | . | PA:GOLGA6C  | intronic   | NM_.      | .          |
| ACa07 | 15 | #### | .         | C | T | . | PA:GOLGA6C  | intronic   | NM_.      | .          |
| ACa07 | 15 | #### | rs9744245 | G | A | . | PA:SCAPER   | intronic   | NM_.      | .          |
| ACa07 | 15 | #### | rs1047518 | C | T | . | PA:SCAPER   | intronic   | NM_.      | .          |
| ACa07 | 15 | #### | rs8789048 | A | G | . | PA:LOC64575 | ncRNA_NR_. | .         | .          |
| ACa07 | 15 | #### | .         | G | T | . | PA:.        | intergen   | NR_dist=. | .          |
| ACa07 | 15 | #### | .         | C | T | . | PA:ADAMTS7  | intronic   | NM_.      | .          |
| ACa07 | 15 | #### | rs1471333 | C | T | . | PA:KIAA1024 | exonic     | NM_.      | syr KIAA10 |
| ACa07 | 15 | #### | .         | G | A | . | PA:FAH      | intronic   | NM_.      | .          |
| ACa07 | 15 | #### | rs5292517 | G | A | . | PA:CEMIP    | intronic   | NM_.      | .          |
| ACa07 | 15 | #### | .         | T | C | . | PA:C15orf26 | intronic   | NM_.      | .          |
| ACa07 | 15 | #### | rs9410184 | C | T | . | PA:ADAMTSL  | intronic   | NM_.      | .          |
| ACa07 | 15 | #### | rs7920451 | A | G | . | PA:GOLGA6L  | exonic     | NM_.      | mis GOLGA  |
| ACa07 | 15 | #### | .         | G | A | . | PA:AKAP13   | intronic   | NM_.      | .          |
| ACa07 | 15 | #### | rs3718116 | C | T | . | PA:KLHL25   | exonic     | NM_.      | mis KLHL25 |
| ACa07 | 15 | #### | .         | G | A | . | PA:POLG     | exonic     | NM_.      | mis POLG:N |
| ACa07 | 15 | #### | .         | A | T | . | PA:RHCG     | intronic   | NM_.      | .          |
| ACa07 | 15 | #### | rs2012804 | G | A | . | PA:KIF7     | exonic     | NM_.      | syr KIF7:N |
| ACa07 | 15 | #### | .         | C | T | . | PA:KIF7     | exonic     | NM_.      | syr KIF7:N |
| ACa07 | 15 | #### | rs1475111 | C | T | . | PA:ZNF710   | exonic     | NM_.      | unl UNKNC  |
| ACa07 | 15 | #### | rs5584446 | T | C | . | PA:.        | upstream   | NM_.      | .          |
| ACa07 | 15 | #### | .         | T | C | . | PA:ADAMTS1  | exonic     | NM_.      | syr ADAMT  |
| ACa07 | 15 | #### | .         | C | T | . | PA:PRKXP1   | ncRNA_NR_. | .         | .          |
| ACa07 | 15 | #### | .         | G | T | . | PA:LRRK1    | intronic   | NM_.      | .          |
| ACa07 | 15 | #### | rs7764234 | G | A | . | PA:PCSK6    | exonic     | NM_.      | unl UNKNC  |
| ACa07 | 15 | #### | .         | C | A | . | PA:TARSL2   | intronic   | NM_.      | .          |
| ACa07 | 15 | #### | .         | G | A | . | PA:.        | intergen   | NM_dist=. | .          |

|       |    |      |           |   |   |   |             |          |           |                |
|-------|----|------|-----------|---|---|---|-------------|----------|-----------|----------------|
| ACa07 | 15 | #### | rs3682087 | G | A | . | PA:.        | intergen | NM_dist=. | .              |
| ACa07 | 15 | #### | .         | C | T | . | PA:.        | intergen | NM_dist=. | .              |
| ACa07 | 15 | #### | .         | A | G | . | PA:DDX11L9  | ncRNA    | NR_.      | .              |
| ACa07 | 16 | #### | rs7613665 | G | A | . | PA:NPRL3    | exonic   | NM_.      | unl UNKNC      |
| ACa07 | 16 | #### | .         | G | T | . | PA:ITFG3    | exonic   | NM_.      | mis ITFG3:1    |
| ACa07 | 16 | #### | .         | G | A | . | PA:RGS11    | intronic | NM_.      | .              |
| ACa07 | 16 | #### | rs8927038 | G | C | . | PA:RAB11F1F | intronic | NM_.      | .              |
| ACa07 | 16 | #### | rs1998911 | C | T | . | PA:WFIKKN1  | exonic   | NM_.      | mis WFIKKN1    |
| ACa07 | 16 | #### | rs2010028 | C | T | . | PA:RHOT2    | intronic | NM_.      | .              |
| ACa07 | 16 | #### | rs7767345 | G | A | . | PA:JMJD8    | exonic   | NM_.      | mis JMJD8:1    |
| ACa07 | 16 | #### | rs1466306 | C | T | . | PA:FBXL16   | exonic   | NM_.      | mis FBXL16:1   |
| ACa07 | 16 | #### | rs3681933 | C | T | . | PA:NARFL    | exonic   | NM_.      | syr NARFL:1    |
| ACa07 | 16 | #### | .         | G | T | . | PA:CHTF18   | exonic   | NM_.      | syr CHTF18:1   |
| ACa07 | 16 | #### | .         | C | A | . | PA:LMF1     | intronic | NM_.      | .              |
| ACa07 | 16 | #### | rs1506415 | C | T | . | PA:SSTR5    | exonic   | NM_.      | syr SSTR5:1    |
| ACa07 | 16 | #### | rs9971019 | G | A | . | PA:UBE2I    | intronic | NM_.      | .              |
| ACa07 | 16 | #### | .         | A | T | . | PA:BAIAP3   | exonic   | NM_.      | mis BAIAP3:1   |
| ACa07 | 16 | #### | rs3710800 | C | T | . | PA:BAIAP3   | intronic | NM_.      | .              |
| ACa07 | 16 | #### | .         | G | A | . | PA:BAIAP3   | exonic   | NM_.      | mis BAIAP3:1   |
| ACa07 | 16 | #### | rs7592188 | C | T | . | PA:BAIAP3   | intronic | NM_.      | .              |
| ACa07 | 16 | #### | .         | G | A | . | PA:BAIAP3   | exonic   | NM_.      | mis BAIAP3:1   |
| ACa07 | 16 | #### | rs5365360 | G | A | . | PA:.        | intergen | NM_dist=. | .              |
| ACa07 | 16 | #### | rs7601714 | C | T | . | PA:CLCN7    | exonic   | NM_.      | mis CLCN7:1    |
| ACa07 | 16 | #### | .         | C | T | . | PA:HN1L     | intronic | NM_.      | .              |
| ACa07 | 16 | #### | rs1450874 | C | T | . | PA:HN1L     | exonic   | NM_.      | mis HN1L:N     |
| ACa07 | 16 | #### | .         | T | A | . | PA:MAPK8IP3 | exonic   | NM_.      | syr MAPK8IP3:1 |
| ACa07 | 16 | #### | rs3749279 | G | A | . | PA:RPL3L    | exonic   | NM_.      | syr RPL3L:1    |
| ACa07 | 16 | #### | .         | C | A | . | PA:GFER     | intronic | NM_.      | .              |
| ACa07 | 16 | #### | rs7634894 | G | A | . | PA:ZNF598   | exonic   | NM_.      | mis ZNF598:1   |
| ACa07 | 16 | #### | .         | G | A | . | PA:TRAF7    | intronic | NM_.      | .              |
| ACa07 | 16 | #### | .         | T | C | . | PA:NTN3     | intronic | NM_.      | .              |
| ACa07 | 16 | #### | .         | G | A | . | PA:CCDC64B  | UTR3     | NM_NM_.   | .              |
| ACa07 | 16 | #### | rs1416929 | C | T | . | PA:ZSCAN32  | intronic | NM_.      | .              |
| ACa07 | 16 | #### | .         | A | G | . | PA:ZNF597   | exonic   | NM_.      | syr ZNF597:1   |
| ACa07 | 16 | #### | rs7525617 | C | T | . | PA:CLUAP1   | intronic | NM_.      | .              |
| ACa07 | 16 | #### | rs5345285 | G | A | . | PA:SLX4     | exonic   | NM_.      | mis SLX4:N     |
| ACa07 | 16 | #### | .         | C | A | . | PA:CREBBP   | exonic   | NM_.      | mis CREBBP:1   |
| ACa07 | 16 | #### | rs5502446 | T | A | . | PA:CREBBP   | intronic | NM_.      | .              |
| ACa07 | 16 | #### | rs1894802 | G | A | . | PA:CREBBP   | intronic | NM_.      | .              |
| ACa07 | 16 | #### | rs3711593 | C | T | . | PA:ADCY9    | exonic   | NM_.      | syr ADCY9:1    |
| ACa07 | 16 | #### | rs2013575 | C | T | . | PA:VASN     | exonic   | NM_.      | mis VASN:N     |
| ACa07 | 16 | #### | .         | G | T | . | PA:PPL      | exonic   | NM_.      | mis PPL:NM     |
| ACa07 | 16 | #### | rs5632991 | G | A | . | PA:CIITA    | exonic   | NM_.      | mis CIITA:N    |
| ACa07 | 16 | #### | rs7679436 | T | C | . | PA:CIITA    | intronic | NM_.      | .              |
| ACa07 | 16 | #### | rs9184234 | G | A | . | PA:.        | intergen | NM_dist=. | .              |
| ACa07 | 16 | #### | rs7800288 | A | G | . | PA:BFAR     | intronic | NM_.      | .              |
| ACa07 | 16 | #### | rs5668064 | G | A | . | PA:PDXDC1   | intronic | NM_.      | .              |
| ACa07 | 16 | #### | rs7507758 | G | A | . | PA:.        | intergen | NM_dist=. | .              |
| ACa07 | 16 | #### | .         | C | T | . | PA:KIAA0430 | UTR5     | NM_NM_.   | .              |
| ACa07 | 16 | #### | .         | C | T | . | PA:NDE1     | intronic | NM_.      | .              |
| ACa07 | 16 | #### | .         | G | A | . | PA:ABCC1    | intronic | NM_.      | .              |
| ACa07 | 16 | #### | .         | T | C | . | PA:.        | intergen | NR_dist=. | .              |
| ACa07 | 16 | #### | rs1784261 | A | T | . | PA:SMG1     | exonic   | NM_.      | mis SMG1:1     |
| ACa07 | 16 | #### | rs7575963 | G | A | . | PA:SYT17    | exonic   | NM_.      | mis SYT17:1    |

|       |    |      |           |   |   |   |             |            |            |     |        |
|-------|----|------|-----------|---|---|---|-------------|------------|------------|-----|--------|
| ACa07 | 16 | #### | rs7647908 | G | A | . | PA:UMOD     | exonic     | NM_.       | syr | UMOD:  |
| ACa07 | 16 | #### | .         | C | A | . | PA:ZP2      | exonic     | NM_.       | unl | UNKNC  |
| ACa07 | 16 | #### | rs1829590 | C | T | . | PA:EEF2K    | intronic   | NM_.       | .   | .      |
| ACa07 | 16 | #### | .         | G | A | . | PA:GGA2     | exonic     | NM_.       | mis | GGA2:1 |
| ACa07 | 16 | #### | .         | C | T | . | PA:ERN2     | exonic     | NM_.       | mis | ERN2:1 |
| ACa07 | 16 | #### | rs9722593 | C | T | . | PA:LCMT1    | intronic   | NM_.       | .   | .      |
| ACa07 | 16 | #### | .         | G | T | . | PA:.        | intergen   | NM_dist=.  | .   | .      |
| ACa07 | 16 | #### | .         | G | A | . | PA:GTF3C1   | exonic     | NM_.       | mis | GTF3C  |
| ACa07 | 16 | #### | .         | C | T | . | PA:KIAA0556 | intronic   | NM_.       | .   | .      |
| ACa07 | 16 | #### | rs1412530 | G | A | . | PA:KIAA0556 | exonic     | NM_.       | mis | KIAA05 |
| ACa07 | 16 | #### | rs1909424 | A | T | . | PA:XPO6     | intronic   | NM_.       | .   | .      |
| ACa07 | 16 | #### | .         | G | A | . | PA:.        | intergen   | NM_dist=.  | .   | .      |
| ACa07 | 16 | #### | rs7491998 | C | T | . | PA:ATXN2L   | exonic     | NM_.       | mis | ATXN2L |
| ACa07 | 16 | #### | .         | T | C | . | PA:TUFM     | UTR5       | NM_NM_.    | .   | .      |
| ACa07 | 16 | #### | rs1820846 | G | A | . | PA:ATP2A1   | exonic     | NM_.       | mis | ATP2A1 |
| ACa07 | 16 | #### | .         | G | T | . | PA:.        | intergen   | NR_dist=.  | .   | .      |
| ACa07 | 16 | #### | .         | G | T | . | PA:.        | upstream   | NM_.       | .   | .      |
| ACa07 | 16 | #### | rs7813295 | C | T | . | PA:KCTD13   | exonic     | NM_.       | mis | KCTD13 |
| ACa07 | 16 | #### | rs9659529 | G | A | . | PA:BCKDK    | intronic   | NM_.       | .   | .      |
| ACa07 | 16 | #### | .         | T | C | . | PA:PRSS36   | intronic   | NM_.       | .   | .      |
| ACa07 | 16 | #### | .         | G | T | . | PA:ITGAX    | intronic   | NM_.       | .   | .      |
| ACa07 | 16 | #### | .         | C | A | . | PA:ZNF267   | exonic     | NM_.       | syr | ZNF267 |
| ACa07 | 16 | #### | rs7477221 | C | T | . | PA:.        | intergen   | NR_dist=.  | .   | .      |
| ACa07 | 16 | #### | rs460256  | A | G | . | PA:.        | intergen   | NR_dist=.  | .   | .      |
| ACa07 | 16 | #### | .         | A | G | . | PA:.        | intergen   | NR_dist=.  | .   | .      |
| ACa07 | 16 | #### | .         | A | G | . | PA:.        | intergen   | NR_dist=.  | .   | .      |
| ACa07 | 16 | #### | rs3744640 | G | C | . | PA:.        | intergen   | NR_dist=.  | .   | .      |
| ACa07 | 16 | #### | .         | C | A | . | PA:RNU6-76F | ncRNA_NR_. | .          | .   | .      |
| ACa07 | 16 | #### | .         | A | C | . | PA:.        | intergen   | NR_dist=.  | .   | .      |
| ACa07 | 16 | #### | .         | C | G | . | PA:.        | intergen   | NR_dist=.  | .   | .      |
| ACa07 | 16 | #### | rs1333894 | A | C | . | PA:.        | intergen   | NOI dist=. | .   | .      |
| ACa07 | 16 | #### | rs2885478 | C | T | . | PA:.        | intergen   | NOI dist=. | .   | .      |
| ACa07 | 16 | #### | rs4249087 | T | G | . | PA:.        | intergen   | NOI dist=. | .   | .      |
| ACa07 | 16 | #### | rs5591122 | C | T | . | PA:.        | intergen   | NOI dist=. | .   | .      |
| ACa07 | 16 | #### | rs4246405 | G | C | . | PA:.        | intergen   | NOI dist=. | .   | .      |
| ACa07 | 16 | #### | rs4292070 | G | C | . | PA:.        | intergen   | NOI dist=. | .   | .      |
| ACa07 | 16 | #### | rs8799648 | A | G | . | PA:.        | intergen   | NOI dist=. | .   | .      |
| ACa07 | 16 | #### | rs8799977 | A | C | . | PA:.        | intergen   | NOI dist=. | .   | .      |
| ACa07 | 16 | #### | rs4291933 | A | G | . | PA:.        | intergen   | NOI dist=. | .   | .      |
| ACa07 | 16 | #### | rs4375682 | A | G | . | PA:.        | intergen   | NOI dist=. | .   | .      |
| ACa07 | 16 | #### | rs7200104 | T | G | . | PA:.        | intergen   | NOI dist=. | .   | .      |
| ACa07 | 16 | #### | rs7188643 | A | G | . | PA:.        | intergen   | NOI dist=. | .   | .      |
| ACa07 | 16 | #### | rs9328642 | G | C | . | PA:.        | intergen   | NOI dist=. | .   | .      |
| ACa07 | 16 | #### | rs7205231 | T | A | . | PA:.        | intergen   | NOI dist=. | .   | .      |
| ACa07 | 16 | #### | rs4445923 | A | T | . | PA:.        | intergen   | NOI dist=. | .   | .      |
| ACa07 | 16 | #### | rs2887500 | T | G | . | PA:.        | intergen   | NOI dist=. | .   | .      |
| ACa07 | 16 | #### | rs2888543 | G | T | . | PA:.        | intergen   | NOI dist=. | .   | .      |
| ACa07 | 16 | #### | rs7664258 | G | A | . | PA:.        | intergen   | NOI dist=. | .   | .      |
| ACa07 | 16 | #### | rs4249076 | T | C | . | PA:.        | intergen   | NOI dist=. | .   | .      |
| ACa07 | 16 | #### | .         | T | C | . | PA:.        | intergen   | NOI dist=. | .   | .      |
| ACa07 | 16 | #### | rs3683497 | G | A | . | PA:MYLK3    | exonic     | NM_.       | syr | MYLK3: |
| ACa07 | 16 | #### | .         | C | A | . | PA:PHKB     | intronic   | NM_.       | .   | .      |
| ACa07 | 16 | #### | .         | C | A | . | PA:MT1E     | intronic   | NM_.       | .   | .      |
| ACa07 | 16 | #### | .         | G | T | . | PA:NUP93    | exonic     | NM_.       | mis | NUP93: |

|       |    |      |           |   |   |   |              |            |           |        |         |
|-------|----|------|-----------|---|---|---|--------------|------------|-----------|--------|---------|
| ACa07 | 16 | #### | .         | A | C | . | PA:NUP93     | intronic   | NM_.      | .      | .       |
| ACa07 | 16 | #### | .         | G | A | . | PA:CETP      | intronic   | NM_.      | .      | .       |
| ACa07 | 16 | #### | rs1471990 | C | T | . | PA:CPNE2     | exonic     | NM_.      | syr    | CPNE2   |
| ACa07 | 16 | #### | .         | T | C | . | PA:DRC7      | intronic   | NM_.      | .      | .       |
| ACa07 | 16 | #### | .         | G | T | . | PA:TEPP      | exonic     | NM_.      | mis    | TEPP:M  |
| ACa07 | 16 | #### | .         | A | G | . | PA:CCDC113   | intronic   | NM_.      | .      | .       |
| ACa07 | 16 | #### | rs1499903 | A | G | . | PA:.         | intergen   | NOI       | dist=. | .       |
| ACa07 | 16 | #### | .         | C | T | . | PA:EXOC3L1   | exonic     | NM_.      | mis    | EXOC3   |
| ACa07 | 16 | #### | rs1054074 | A | G | . | PA:EXOC3L1   | intronic   | NM_.      | .      | .       |
| ACa07 | 16 | #### | rs7715372 | C | T | . | PA:ELMO3     | exonic     | NM_.      | syr    | ELMO3   |
| ACa07 | 16 | #### | rs5618721 | G | A | . | PA:SLC9A5    | exonic     | NM_.      | mis    | SLC9A5  |
| ACa07 | 16 | #### | .         | G | T | . | PA:KCTD19    | intronic   | NM_.      | .      | .       |
| ACa07 | 16 | #### | rs7545456 | C | T | . | PA:LRRC36    | exonic     | NM_.      | mis    | LRRC36  |
| ACa07 | 16 | #### | rs3696380 | G | A | . | PA:ZDHHC1    | intronic   | NM_.      | .      | .       |
| ACa07 | 16 | #### | .         | C | A | . | PA:CTCF      | intronic   | NM_.      | .      | .       |
| ACa07 | 16 | #### | rs7584347 | C | T | . | PA:CTRL      | exonic     | NM_.      | mis    | CTRL:M  |
| ACa07 | 16 | #### | .         | C | A | . | PA:SLC12A4   | intronic   | NM_.      | .      | .       |
| ACa07 | 16 | #### | .         | G | A | . | PA:DDX28     | exonic     | NM_.      | syr    | DDX28:  |
| ACa07 | 16 | #### | .         | C | T | . | PA:TERF2     | exonic     | NM_.      | mis    | TERF2:  |
| ACa07 | 16 | #### | rs8670174 | A | G | . | PA:LOC100506 | ncRNA_NR_. | .         | .      | .       |
| ACa07 | 16 | #### | rs9278778 | C | T | . | PA:.         | intergen   | NM_dist=. | .      | .       |
| ACa07 | 16 | #### | rs1485518 | C | T | . | PA:.         | intergen   | NM_dist=. | .      | .       |
| ACa07 | 16 | #### | rs3776990 | G | A | . | PA:PKD1L3    | exonic     | NM_.      | unl    | UNKNC   |
| ACa07 | 16 | #### | rs7502787 | G | T | . | PA:CLEC18B   | intronic   | NM_.      | .      | .       |
| ACa07 | 16 | #### | .         | C | T | . | PA:MLKL      | intronic   | NM_.      | .      | .       |
| ACa07 | 16 | #### | .         | C | T | . | PA:BCAR1     | intronic   | NM_.      | .      | .       |
| ACa07 | 16 | #### | rs1469198 | A | G | . | PA:LOC102406 | ncRNA_NR_. | .         | .      | .       |
| ACa07 | 16 | #### | rs7733922 | G | A | . | PA:PKD1L2    | exonic     | NM_.      | unl    | UNKNC   |
| ACa07 | 16 | #### | .         | T | C | . | PA:PLCG2     | intronic   | NM_.      | .      | .       |
| ACa07 | 16 | #### | rs7483034 | C | T | . | PA:MLYCD     | UTR3       | NM_NM_.   | .      | .       |
| ACa07 | 16 | #### | rs1407517 | G | A | . | PA:DNAAF1    | exonic     | NM_.      | mis    | DNAAF   |
| ACa07 | 16 | #### | rs7647118 | G | A | . | PA:TAF1C     | exonic     | NM_.      | mis    | TAF1C:  |
| ACa07 | 16 | #### | rs9336865 | C | T | . | PA:GSE1      | exonic     | NM_.      | mis    | GSE1:M  |
| ACa07 | 16 | #### | .         | T | A | . | PA:FOXC2     | exonic     | NM_.      | mis    | FOXC2   |
| ACa07 | 16 | #### | rs3681305 | C | T | . | PA:FBXO31    | exonic     | NM_.      | syr    | FBXO3   |
| ACa07 | 16 | #### | rs9665470 | T | C | . | PA:JPH3      | intronic   | NM_.      | .      | .       |
| ACa07 | 16 | #### | rs5606502 | G | A | . | PA:ZNF469    | exonic     | NM_.      | mis    | ZNF469  |
| ACa07 | 16 | #### | rs9646181 | C | T | . | PA:MVD       | intronic   | NM_.      | .      | .       |
| ACa07 | 16 | #### | .         | C | T | . | PA:CBFA2T3   | exonic     | NM_.      | mis    | CBFA2T3 |
| ACa07 | 16 | #### | .         | C | A | . | PA:CDK10     | intronic   | NM_.      | .      | .       |
| ACa07 | 16 | #### | rs2017315 | G | A | . | PA:ZNF276    | exonic     | NM_.      | syr    | ZNF276  |
| ACa07 | 16 | #### | rs7530482 | G | A | . | PA:ZNF276    | UTR3       | NM_NM_.   | .      | .       |
| ACa07 | 17 | #### | rs7627705 | T | C | . | PA:MYO1C     | exonic     | NM_.      | mis    | MYO1C   |
| ACa07 | 17 | #### | .         | C | T | . | PA:PRPF8     | exonic     | NM_.      | mis    | PRPF8:  |
| ACa07 | 17 | #### | .         | A | G | . | PA:TLCD2     | UTR3       | NM_NM_.   | .      | .       |
| ACa07 | 17 | #### | .         | T | C | . | PA:HIC1      | exonic     | NM_.      | syr    | HIC1:NI |
| ACa07 | 17 | #### | .         | C | A | . | PA:SMG6      | intronic   | NM_.      | .      | .       |
| ACa07 | 17 | #### | .         | G | T | . | PA:SMG6      | exonic     | NM_.      | mis    | SMG6:NI |
| ACa07 | 17 | #### | rs7803486 | C | T | . | PA:MNT       | exonic     | NM_.      | mis    | MNT:NI  |
| ACa07 | 17 | #### | .         | A | G | . | PA:METTL16   | exonic     | NM_.      | syr    | METTL   |
| ACa07 | 17 | #### | .         | T | C | . | PA:CAMKK1    | UTR3       | NM_NM_.   | .      | .       |
| ACa07 | 17 | #### | .         | A | C | . | PA:ANKFY1    | intronic   | NM_.      | .      | .       |
| ACa07 | 17 | #### | rs5506079 | C | T | . | PA:UBE2G1    | intronic   | NM_.      | .      | .       |
| ACa07 | 17 | #### | rs3764321 | C | T | . | PA:PELP1     | exonic     | NM_.      | syr    | PELP1:  |

|       |    |      |           |   |   |   |              |            |           |             |
|-------|----|------|-----------|---|---|---|--------------|------------|-----------|-------------|
| ACa07 | 17 | #### | rs2008227 | G | A | . | PA:KIF1C     | exonic     | NM_.      | syr KIF1C:1 |
| ACa07 | 17 | #### | rs2013516 | C | T | . | PA:ZNF594    | exonic     | NM_.      | mis ZNF594  |
| ACa07 | 17 | #### | .         | C | T | . | PA:DHX33     | intronic   | NM_.      | .           |
| ACa07 | 17 | #### | .         | T | C | . | PA:KIAA0753  | exonic     | NM_.      | mis KIAA07  |
| ACa07 | 17 | #### | .         | C | T | . | PA:SLC13A5   | intronic   | NM_.      | .           |
| ACa07 | 17 | #### | .         | A | G | . | PA:CLEC10A   | intronic   | NM_.      | .           |
| ACa07 | 17 | #### | rs2000463 | G | A | . | PA:NEURL4    | exonic     | NM_.      | mis NEURL   |
| ACa07 | 17 | #### | rs7455911 | G | A | . | PA:POLR2A    | exonic     | NM_.      | mis POLR2   |
| ACa07 | 17 | #### | rs1473707 | G | A | . | PA:CCDC42    | exonic     | NM_.      | syr CCDC4   |
| ACa07 | 17 | #### | .         | C | T | . | PA:PIK3R6    | exonic     | NM_.      | unl UNKNC   |
| ACa07 | 17 | #### | .         | C | T | . | PA:GAS7      | splicing   | NM_NM_.   | .           |
| ACa07 | 17 | #### | rs7534759 | A | G | . | PA:DNAH9     | intronic   | NM_.      | .           |
| ACa07 | 17 | #### | .         | G | T | . | PA:DNAH9     | exonic     | NM_.      | sto DNAH9   |
| ACa07 | 17 | #### | .         | C | T | . | PA:HS3ST3B   | exonic     | NM_.      | syr HS3ST:  |
| ACa07 | 17 | #### | rs7633797 | C | T | . | PA:TEKT3     | exonic     | NM_.      | syr TEKT3:  |
| ACa07 | 17 | #### | rs6207237 | G | A | . | PA:TBC1D26   | intronic   | NM_.      | .           |
| ACa07 | 17 | #### | .         | G | A | . | PA:NCOR1     | exonic     | NM_.      | syr NCOR1   |
| ACa07 | 17 | #### | .         | T | C | . | PA:NCOR1     | intronic   | NM_.      | .           |
| ACa07 | 17 | #### | .         | C | T | . | PA:MPRIP     | intronic   | NM_.      | .           |
| ACa07 | 17 | #### | .         | G | A | . | PA:MPRIP     | intronic   | NM_.      | .           |
| ACa07 | 17 | #### | rs1157965 | G | A | . | PA:MYO15A    | intronic   | NM_.      | .           |
| ACa07 | 17 | #### | .         | A | G | . | PA:MYO15A    | splicing   | NM_NM_.   | .           |
| ACa07 | 17 | #### | .         | G | A | . | PA:EVPLL     | intronic   | NM_.      | .           |
| ACa07 | 17 | #### | .         | C | A | . | PA:LGALS9B   | exonic     | NM_.      | syr LGALS9  |
| ACa07 | 17 | #### | rs2869918 | T | C | . | PA:LGALS9B   | UTR5       | NM_NM_.   | .           |
| ACa07 | 17 | #### | rs7529523 | G | A | . | PA:USP22     | intronic   | NM_.      | .           |
| ACa07 | 17 | #### | .         | G | A | . | PA:MAP2K3    | intronic   | NM_.      | .           |
| ACa07 | 17 | #### | .         | C | T | . | PA:NOS2      | intronic   | NM_.      | .           |
| ACa07 | 17 | #### | .         | A | T | . | PA:SLC13A2   | intronic   | NM_.      | .           |
| ACa07 | 17 | #### | .         | G | T | . | PA:SLC13A2   | intronic   | NM_.      | .           |
| ACa07 | 17 | #### | .         | C | T | . | PA:.         | upstream   | NM_.      | .           |
| ACa07 | 17 | #### | .         | C | T | . | PA:SPAG5-A'  | ncRNA_NR_. | .         | .           |
| ACa07 | 17 | #### | rs1051245 | C | T | . | PA:SPAG5-A'  | ncRNA_NR_. | .         | .           |
| ACa07 | 17 | #### | .         | A | G | . | PA:KIAA0100  | intronic   | NM_.      | .           |
| ACa07 | 17 | #### | .         | C | T | . | PA:SEZ6      | exonic     | NM_.      | mis SEZ6:N  |
| ACa07 | 17 | #### | .         | C | T | . | PA:MYO18A    | exonic     | NM_.      | mis MYO18   |
| ACa07 | 17 | #### | rs7968757 | A | G | . | PA:SLC6A4    | intronic   | NM_.      | .           |
| ACa07 | 17 | #### | rs5324904 | C | T | . | PA:EVI2A     | exonic     | NM_.      | mis EVI2A:1 |
| ACa07 | 17 | #### | .         | G | T | . | PA:RAB11F1F  | intronic   | NM_.      | .           |
| ACa07 | 17 | #### | .         | A | G | . | PA:UTP6      | intronic   | NM_.      | .           |
| ACa07 | 17 | #### | .         | G | T | . | PA:UTP6      | intronic   | NM_.      | .           |
| ACa07 | 17 | #### | .         | G | T | . | PA:C17orf102 | intronic   | NM_.      | .           |
| ACa07 | 17 | #### | .         | G | A | . | PA:NLE1      | exonic     | NM_.      | mis NLE1:N  |
| ACa07 | 17 | #### | rs7610872 | C | T | . | PA:SLFN11    | exonic     | NM_.      | mis SLFN11  |
| ACa07 | 17 | #### | .         | G | T | . | PA:.         | intergen   | NM_dist=. | .           |
| ACa07 | 17 | #### | .         | C | A | . | PA:AP2B1     | intronic   | NM_.      | .           |
| ACa07 | 17 | #### | rs3702689 | T | G | . | PA:TBC1D3B   | UTR3       | NM_NM_.   | .           |
| ACa07 | 17 | #### | rs3720623 | T | C | . | PA:.         | upstream   | NM_.      | .           |
| ACa07 | 17 | #### | .         | A | G | . | PA:ARHGAP2   | intronic   | NM_.      | .           |
| ACa07 | 17 | #### | rs7545869 | C | T | . | PA:PCGF2     | exonic     | NM_.      | mis PCGF2   |
| ACa07 | 17 | #### | .         | G | T | . | PA:PLXDC1    | intronic   | NM_.      | .           |
| ACa07 | 17 | #### | rs7807350 | G | A | . | PA:CACNB1    | exonic     | NM_.      | mis CACNB   |
| ACa07 | 17 | #### | .         | C | T | . | PA:RPL19     | intronic   | NM_.      | .           |
| ACa07 | 17 | #### | .         | C | T | . | PA:STAC2     | intronic   | NM_.      | .           |

|       |    |      |           |   |   |   |              |            |           |     |         |
|-------|----|------|-----------|---|---|---|--------------|------------|-----------|-----|---------|
| ACa07 | 17 | #### | rs1057519 | G | A | . | PA:ERBB2     | exonic     | NM_.      | mis | ERBB2:  |
| ACa07 | 17 | #### | rs1996216 | C | T | . | PA:CCR7      | exonic     | NM_.      | syr | CCR7:N  |
| ACa07 | 17 | #### | rs1488746 | C | T | . | PA:KRT34     | exonic     | NM_.      | syr | KRT34:  |
| ACa07 | 17 | #### | rs7824576 | C | T | . | PA:LEPREL4   | exonic     | NM_.      | syr | LEPREL  |
| ACa07 | 17 | #### | rs7827568 | G | A | . | PA:TTC25     | intronic   | NM_.      | .   | .       |
| ACa07 | 17 | #### | .         | A | G | . | PA:TTC25     | intronic   | NM_.      | .   | .       |
| ACa07 | 17 | #### | .         | G | T | . | PA:STAT3     | intronic   | NM_.      | .   | .       |
| ACa07 | 17 | #### | rs9065729 | G | A | . | PA:STAT3     | intronic   | NM_.      | .   | .       |
| ACa07 | 17 | #### | rs5769204 | G | A | . | PA:STAT3     | intronic   | NM_.      | .   | .       |
| ACa07 | 17 | #### | .         | G | T | . | PA:COASY     | intronic   | NM_.      | .   | .       |
| ACa07 | 17 | #### | rs1042659 | C | T | . | PA:WNK4      | intronic   | NM_.      | .   | .       |
| ACa07 | 17 | #### | rs9984123 | C | T | . | PA:NBR2      | ncRNA_NR_. | .         | .   |         |
| ACa07 | 17 | #### | .         | A | G | . | PA:NBR1      | intronic   | NM_.      | .   | .       |
| ACa07 | 17 | #### | .         | G | A | . | PA:LINC0091  | ncRNA_NR_. | .         | .   |         |
| ACa07 | 17 | #### | .         | G | T | . | PA:MPP3      | exonic     | NM_.      | syr | MPP3:N  |
| ACa07 | 17 | #### | .         | C | A | . | PA:MPP3      | intronic   | NM_.      | .   | .       |
| ACa07 | 17 | #### | rs7617924 | G | A | . | PA:MPP3      | exonic     | NM_.      | syr | MPP3:N  |
| ACa07 | 17 | #### | .         | T | G | . | PA:C17orf104 | exonic     | NM_.      | syr | C17orf1 |
| ACa07 | 17 | #### | rs9135110 | C | T | . | PA:KIF18B    | intronic   | NM_.      | .   | .       |
| ACa07 | 17 | #### | .         | G | T | . | PA:ACBD4     | intronic   | NM_.      | .   | .       |
| ACa07 | 17 | #### | rs7805429 | C | T | . | PA:FMNL1     | exonic     | NM_.      | mis | FMNL1:  |
| ACa07 | 17 | #### | .         | C | T | . | PA:PLEKHM1   | intronic   | NM_.      | .   | .       |
| ACa07 | 17 | #### | .         | C | T | . | PA:LRRC37A   | ncRNA_NR_. | .         | .   |         |
| ACa07 | 17 | #### | .         | G | A | . | PA:.         | intergen   | NR_dist=. | .   | .       |
| ACa07 | 17 | #### | rs1002396 | G | A | . | PA:NSF       | intronic   | NM_.      | .   | .       |
| ACa07 | 17 | #### | rs1056060 | A | G | . | PA:.         | intergen   | NM_dist=. | .   | .       |
| ACa07 | 17 | #### | rs2644320 | C | T | . | PA:NPEPPS    | splicing   | NM_NM_.   | .   | .       |
| ACa07 | 17 | #### | .         | A | G | . | PA:OSBPL7    | intronic   | NM_.      | .   | .       |
| ACa07 | 17 | #### | rs3749157 | G | A | . | PA:ABI3      | exonic     | NM_.      | mis | ABI3:NI |
| ACa07 | 17 | #### | rs9379553 | G | A | . | PA:ZNF652    | exonic     | NM_.      | syr | ZNF652  |
| ACa07 | 17 | #### | .         | G | T | . | PA:DLX4      | UTR3       | NM_NM_.   | .   | .       |
| ACa07 | 17 | #### | rs7784106 | C | T | . | PA:SAMD14    | exonic     | NM_.      | mis | SAMD1   |
| ACa07 | 17 | #### | .         | C | A | . | PA:PPP1R9B   | intronic   | NM_.      | .   | .       |
| ACa07 | 17 | #### | .         | G | A | . | PA:PPP1R9B   | exonic     | NM_.      | unl | UNKNC   |
| ACa07 | 17 | #### | rs1029268 | C | T | . | PA:COL1A1    | intronic   | NM_.      | .   | .       |
| ACa07 | 17 | #### | .         | G | T | . | PA:XYLT2     | intronic   | NM_.      | .   | .       |
| ACa07 | 17 | #### | rs3894278 | A | T | . | PA:MYCBPAF   | intronic   | NM_.      | .   | .       |
| ACa07 | 17 | #### | .         | C | T | . | PA:HLF       | intronic   | NM_.      | .   | .       |
| ACa07 | 17 | #### | .         | G | A | . | PA:RAD51C    | intronic   | NM_.      | .   | .       |
| ACa07 | 17 | #### | rs3677870 | A | G | . | PA:PPM1D     | intronic   | NM_.      | .   | .       |
| ACa07 | 17 | #### | .         | G | T | . | PA:GH1       | intronic   | NM_.      | .   | .       |
| ACa07 | 17 | #### | rs7637250 | C | T | . | PA:SCN4A     | exonic     | NM_.      | syr | SCN4A   |
| ACa07 | 17 | #### | .         | C | A | . | PA:PLEKHM1   | ncRNA_NR_. | .         | .   |         |
| ACa07 | 17 | #### | .         | C | T | . | PA:HELZ      | exonic     | NM_.      | syr | HELZ:N  |
| ACa07 | 17 | #### | .         | T | C | . | PA:ABCA6     | exonic     | NM_.      | mis | ABCA6:  |
| ACa07 | 17 | #### | .         | C | T | . | PA:MGC1627   | ncRNA_NR_. | .         | .   |         |
| ACa07 | 17 | #### | .         | C | T | . | PA:.         | downstr    | NM_.      | .   | .       |
| ACa07 | 17 | #### | rs5610655 | C | T | . | PA:FDXR      | exonic     | NM_.      | mis | FDXR:N  |
| ACa07 | 17 | #### | rs1018051 | G | C | . | PA:KIAA0195  | intronic   | NM_.      | .   | .       |
| ACa07 | 17 | #### | rs3777274 | G | A | . | PA:CASKIN2   | intronic   | NM_.      | .   | .       |
| ACa07 | 17 | #### | .         | C | T | . | PA:CASKIN2   | intronic   | NM_.      | .   | .       |
| ACa07 | 17 | #### | .         | G | T | . | PA:MYO15B    | ncRNA_NR_. | .         | .   |         |
| ACa07 | 17 | #### | .         | G | T | . | PA:RECQL5    | intronic   | NM_.      | .   | .       |
| ACa07 | 17 | #### | .         | G | C | . | PA:RECQL5    | intronic   | NM_.      | .   | .       |

|       |    |      |           |   |   |   |             |            |           |            |
|-------|----|------|-----------|---|---|---|-------------|------------|-----------|------------|
| ACa07 | 17 | #### | rs3697050 | C | T | . | PA:CYGB     | exonic     | NM_.      | mis CYGB:1 |
| ACa07 | 17 | #### | .         | A | G | . | PA:SNHG16   | ncRNA_NR_. | .         | .          |
| ACa07 | 17 | #### | .         | C | A | . | PA:MGAT5B   | intronic   | NM_.      | .          |
| ACa07 | 17 | #### | rs7670774 | G | A | . | PA:SEC14L1  | intronic   | NM_.      | .          |
| ACa07 | 17 | #### | .         | C | A | . | PA:DNAH17   | intronic   | NM_.      | .          |
| ACa07 | 17 | #### | rs7521502 | C | T | . | PA:DNAH17   | exonic     | NM_.      | mis DNAH1  |
| ACa07 | 17 | #### | .         | G | A | . | PA:RBF3X3   | exonic     | NM_.      | mis RBF3X  |
| ACa07 | 17 | #### | .         | G | A | . | PA:CBX4     | exonic     | NM_.      | mis CBX4:N |
| ACa07 | 17 | #### | rs5354610 | G | A | . | PA:CCDC40   | exonic     | NM_.      | mis CCDC4  |
| ACa07 | 17 | #### | rs7737952 | G | A | . | PA:CARD14   | intronic   | NM_.      | .          |
| ACa07 | 17 | #### | rs3676544 | C | T | . | PA:CARD14   | exonic     | NM_.      | syr CARD1  |
| ACa07 | 17 | #### | .         | G | A | . | PA:RNF213   | intronic   | NM_.      | .          |
| ACa07 | 17 | #### | .         | G | A | . | PA:RPTOR    | intronic   | NM_.      | .          |
| ACa07 | 17 | #### | .         | G | A | . | PA:BAIAP2   | exonic     | NM_.      | mis BAIAP2 |
| ACa07 | 17 | #### | .         | C | A | . | PA:CEP131   | intronic   | NM_.      | .          |
| ACa07 | 17 | #### | rs3678800 | C | T | . | PA:LINC0048 | ncRNA_NR_. | .         | .          |
| ACa07 | 17 | #### | .         | G | A | . | PA:BAHCC1   | intronic   | NM_.      | .          |
| ACa07 | 17 | #### | .         | C | T | . | PA:OXLD1    | exonic     | NM_.      | syr OXLD1: |
| ACa07 | 17 | #### | .         | C | A | . | PA:NOTUM    | intronic   | NM_.      | .          |
| ACa07 | 17 | #### | .         | T | C | . | PA:ASPSCR1  | splicing   | NM_NM_.   | .          |
| ACa07 | 17 | #### | .         | G | A | . | PA:FASN     | exonic     | NM_.      | mis FASN:N |
| ACa07 | 17 | #### | rs7594547 | G | A | . | PA:FASN     | exonic     | NM_.      | mis FASN:N |
| ACa07 | 17 | #### | .         | C | T | . | PA:CCDC57   | intronic   | NM_.      | .          |
| ACa07 | 17 | #### | rs1452537 | G | A | . | PA:WDR45B   | exonic     | NM_.      | syr WDR45  |
| ACa07 | 17 | #### | .         | G | A | . | PA:ZNF750   | exonic     | NM_.      | syr ZNF750 |
| ACa07 | 18 | #### | .         | G | A | . | PA:ADCYAP1  | exonic     | NM_.      | mis ADCYA  |
| ACa07 | 18 | #### | .         | A | G | . | PA:NDC80    | intronic   | NM_.      | .          |
| ACa07 | 18 | #### | .         | A | G | . | PA:AFG3L2   | intronic   | NM_.      | .          |
| ACa07 | 18 | #### | .         | G | A | . | PA:CEP192   | intronic   | NM_.      | .          |
| ACa07 | 18 | #### | .         | A | T | . | PA:MC2R     | exonic     | NM_.      | mis MC2R:1 |
| ACa07 | 18 | #### | .         | C | A | . | PA:.        | intergen   | NM_dist=. | .          |
| ACa07 | 18 | #### | .         | G | A | . | PA:.        | intergen   | NR_dist=. | .          |
| ACa07 | 18 | #### | .         | G | T | . | PA:GREB1L   | exonic     | NM_.      | mis GREB1  |
| ACa07 | 18 | #### | rs1390032 | C | T | . | PA:ESCO1    | intronic   | NM_.      | .          |
| ACa07 | 18 | #### | .         | G | T | . | PA:TMEM241  | intronic   | NM_.      | .          |
| ACa07 | 18 | #### | rs5453420 | C | T | . | PA:LAMA3    | exonic     | NM_.      | mis LAMA3: |
| ACa07 | 18 | #### | rs7793765 | C | T | . | PA:GAREM    | UTR3       | NM_NM_.   | .          |
| ACa07 | 18 | #### | .         | A | G | . | PA:ELP2     | exonic     | NM_.      | syr ELP2:N |
| ACa07 | 18 | #### | .         | A | G | . | PA:EPG5     | exonic     | NM_.      | mis EPG5:N |
| ACa07 | 18 | #### | rs7789211 | G | A | . | PA:HDHD2    | intronic   | NM_.      | .          |
| ACa07 | 18 | #### | .         | A | G | . | PA:HDHD2    | intronic   | NM_.      | .          |
| ACa07 | 18 | #### | rs7710491 | G | A | . | PA:MYO5B    | exonic     | NM_.      | mis MYO5B  |
| ACa07 | 18 | #### | .         | C | T | . | PA:CFAP53   | intronic   | NM_.      | .          |
| ACa07 | 18 | #### | .         | G | A | . | PA:.        | intergen   | NM_dist=. | .          |
| ACa07 | 18 | #### | .         | G | T | . | PA:ZCCHC2   | exonic     | NM_.      | mis ZCCHC  |
| ACa07 | 18 | #### | rs1417032 | C | T | . | PA:SERPINB  | exonic     | NM_.      | sto SERPIN |
| ACa07 | 18 | #### | .         | T | C | . | PA:SERPINB  | exonic     | NM_.      | mis SERPIN |
| ACa07 | 18 | #### | .         | A | G | . | PA:RTTN     | exonic     | NM_.      | syr RTTN:N |
| ACa07 | 18 | #### | .         | C | A | . | PA:ZNF407   | exonic     | NM_.      | mis ZNF407 |
| ACa07 | 18 | #### | .         | G | T | . | PA:ATP9B    | intronic   | NM_.      | .          |
| ACa07 | 19 | #### | rs1020066 | C | T | . | PA:MIER2    | intronic   | NM_.      | .          |
| ACa07 | 19 | #### | .         | C | T | . | PA:BSG      | UTR5       | NM_NM_.   | .          |
| ACa07 | 19 | #### | rs3749392 | C | T | . | PA:POLRMT   | intronic   | NM_.      | .          |
| ACa07 | 19 | #### | rs7789396 | G | A | . | PA:POLRMT   | exonic     | NM_.      | mis POLRM  |

|       |    |      |           |   |   |   |              |          |           |             |
|-------|----|------|-----------|---|---|---|--------------|----------|-----------|-------------|
| ACa07 | 19 | #### | .         | G | A | . | PA: PALM     | exonic   | NM_.      | mis PALM:N  |
| ACa07 | 19 | #### | rs3777310 | C | T | . | PA: PTBP1    | intronic | NM_.      | .           |
| ACa07 | 19 | #### | .         | G | T | . | PA: TMEM259  | exonic   | NM_.      | mis TMEM2   |
| ACa07 | 19 | #### | rs9456811 | C | T | . | PA: HMHA1    | exonic   | NM_.      | syr HMHA1   |
| ACa07 | 19 | #### | .         | C | T | . | PA: POLR2E   | intronic | NM_.      | .           |
| ACa07 | 19 | #### | rs7620114 | G | A | . | PA: GPX4     | exonic   | NM_.      | unl UNKNC   |
| ACa07 | 19 | #### | rs2022226 | C | T | . | PA: SBNO2    | exonic   | NM_.      | syr SBNO2   |
| ACa07 | 19 | #### | .         | C | T | . | PA: SBNO2    | intronic | NM_.      | .           |
| ACa07 | 19 | #### | rs7799382 | G | A | . | PA: SBNO2    | intronic | NM_.      | .           |
| ACa07 | 19 | #### | .         | G | A | . | PA: SBNO2    | exonic   | NM_.      | mis SBNO2   |
| ACa07 | 19 | #### | .         | C | A | . | PA: MIDN     | intronic | NM_.      | .           |
| ACa07 | 19 | #### | rs3753640 | C | T | . | PA: CIRBP    | exonic   | NM_.      | mis CIRBP:  |
| ACa07 | 19 | #### | .         | G | A | . | PA: DAZAP1   | intronic | NM_.      | .           |
| ACa07 | 19 | #### | .         | G | A | . | PA: DAZAP1   | intronic | NM_.      | .           |
| ACa07 | 19 | #### | rs1007918 | C | T | . | PA: PLK5     | exonic   | NM_.      | syr PLK5:N  |
| ACa07 | 19 | #### | rs3694032 | G | A | . | PA: DOT1L    | exonic   | NM_.      | syr DOT1L:  |
| ACa07 | 19 | #### | rs7522031 | G | A | . | PA: SPPL2B   | intronic | NM_.      | .           |
| ACa07 | 19 | #### | .         | G | T | . | PA: SGTA     | exonic   | NM_.      | mis SGTA:N  |
| ACa07 | 19 | #### | .         | C | A | . | PA: SGTA     | intronic | NM_.      | .           |
| ACa07 | 19 | #### | rs3763485 | C | T | . | PA: S1PR4    | exonic   | NM_.      | syr S1PR4:  |
| ACa07 | 19 | #### | rs7773785 | C | T | . | PA: NFIC     | intronic | NM_.      | .           |
| ACa07 | 19 | #### | .         | G | A | . | PA: ZFR2     | intronic | NM_.      | .           |
| ACa07 | 19 | #### | .         | C | T | . | PA: ANKRD24  | intronic | NM_.      | .           |
| ACa07 | 19 | #### | rs7591374 | G | A | . | PA: ANKRD24  | exonic   | NM_.      | mis ANKRD   |
| ACa07 | 19 | #### | .         | G | A | . | PA: SH3GL1   | exonic   | NM_.      | sto SH3GL:  |
| ACa07 | 19 | #### | rs1503658 | G | A | . | PA: LRG1     | exonic   | NM_.      | mis LRG1:N  |
| ACa07 | 19 | #### | .         | G | A | . | PA: SEMA6B   | exonic   | NM_.      | syr SEMA6   |
| ACa07 | 19 | #### | .         | T | C | . | PA: KDM4B    | exonic   | NM_.      | mis KDM4B   |
| ACa07 | 19 | #### | .         | C | T | . | PA: SAFB     | intronic | NM_.      | .           |
| ACa07 | 19 | #### | rs1018214 | G | A | . | PA: DUS3L    | intronic | NM_.      | .           |
| ACa07 | 19 | #### | rs7632840 | G | A | . | PA: DENND1C  | exonic   | NM_.      | unl UNKNC   |
| ACa07 | 19 | #### | .         | T | C | . | PA: VAV1     | intronic | NM_.      | .           |
| ACa07 | 19 | #### | rs1390681 | C | T | . | PA: ARHGEF1  | exonic   | NM_.      | mis ARHGE   |
| ACa07 | 19 | #### | rs3770694 | C | T | . | PA: PNPLA6   | intronic | NM_.      | .           |
| ACa07 | 19 | #### | rs3745730 | G | A | . | PA: XAB2     | exonic   | NM_.      | mis XAB2:N  |
| ACa07 | 19 | #### | rs7516930 | C | T | . | PA: XAB2     | exonic   | NM_.      | syr XAB2:N  |
| ACa07 | 19 | #### | rs1417170 | G | A | . | PA: STXBP2   | exonic   | NM_.      | mis STXBP:  |
| ACa07 | 19 | #### | .         | G | T | . | PA: CD209    | UTR3     | NM_NM_.   | .           |
| ACa07 | 19 | #### | .         | C | A | . | PA: CD209    | intronic | NM_.      | .           |
| ACa07 | 19 | #### | rs7595385 | C | T | . | PA: EVI5L    | intronic | NM_.      | .           |
| ACa07 | 19 | #### | rs3527749 | C | T | . | PA: FBN3     | exonic   | NM_.      | mis FBN3:N  |
| ACa07 | 19 | #### | rs7615602 | C | T | . | PA: CD320    | UTR3     | NM_NM_.   | .           |
| ACa07 | 19 | #### | rs5308100 | T | G | . | PA: 2-Mar    | UTR3     | NM_NM_.   | .           |
| ACa07 | 19 | #### | .         | C | T | . | PA: ACTL9    | exonic   | NM_.      | mis ACTL9:  |
| ACa07 | 19 | #### | rs3694972 | C | T | . | PA: .        | intergen | NM_dist=. | .           |
| ACa07 | 19 | #### | rs3751712 | C | G | . | PA: .        | intergen | NM_dist=. | .           |
| ACa07 | 19 | #### | rs5686926 | G | A | . | PA: MUC16    | exonic   | NM_.      | syr MUC16   |
| ACa07 | 19 | #### | rs7801357 | C | T | . | PA: MUC16    | exonic   | NM_.      | mis MUC16   |
| ACa07 | 19 | #### | .         | C | T | . | PA: MUC16    | exonic   | NM_.      | syr MUC16   |
| ACa07 | 19 | #### | .         | A | G | . | PA: FBXL12   | intronic | NM_.      | .           |
| ACa07 | 19 | #### | rs7564749 | G | A | . | PA: PIN1     | exonic   | NM_.      | mis PIN1:NI |
| ACa07 | 19 | #### | rs7814402 | G | A | . | PA: OLFM2    | exonic   | NM_.      | mis OLFM2   |
| ACa07 | 19 | #### | .         | C | T | . | PA: C19orf66 | exonic   | NM_.      | mis C19orf6 |
| ACa07 | 19 | #### | .         | G | A | . | PA: PPAN-P2f | exonic   | NM_.      | mis PPAN-F  |



|       |    |      |           |   |   |   |             |          |           |             |
|-------|----|------|-----------|---|---|---|-------------|----------|-----------|-------------|
| ACa07 | 19 | #### | .         | G | A | . | PA:P2RY11,P | UTR3     | NM_NM_.   | .           |
| ACa07 | 19 | #### | .         | G | T | . | PA:ICAM1    | exonic   | NM_.      | mis ICAM1:  |
| ACa07 | 19 | #### | .         | G | A | . | PA:ICAM5    | intronic | NM_.      | .           |
| ACa07 | 19 | #### | rs1383503 | G | A | . | PA:TYK2     | exonic   | NM_.      | syr TYK2:N  |
| ACa07 | 19 | #### | rs2009930 | G | A | . | PA:PDE4A    | exonic   | NM_.      | syr PDE4A:  |
| ACa07 | 19 | #### | .         | A | G | . | PA:ATG4D    | intronic | NM_.      | .           |
| ACa07 | 19 | #### | .         | C | T | . | PA:KRI1     | exonic   | NM_.      | mis KRI1:NI |
| ACa07 | 19 | #### | rs7634492 | C | T | . | PA:LDLR     | exonic   | NM_.      | syr LDLR:N  |
| ACa07 | 19 | #### | rs3737274 | G | A | . | PA:LDLR     | intronic | NM_.      | .           |
| ACa07 | 19 | #### | rs3721772 | C | T | . | PA:DOCK6    | exonic   | NM_.      | mis DOCK6   |
| ACa07 | 19 | #### | .         | A | G | . | PA:CCDC151  | intronic | NM_.      | .           |
| ACa07 | 19 | #### | rs5385135 | A | T | . | PA:CNN1     | intronic | NM_.      | .           |
| ACa07 | 19 | #### | .         | G | T | . | PA:MAN2B1   | intronic | NM_.      | .           |
| ACa07 | 19 | #### | rs3710318 | G | A | . | PA:DAND5    | exonic   | NM_.      | mis DAND5   |
| ACa07 | 19 | #### | .         | G | A | . | PA:RFX1     | exonic   | NM_.      | mis RFX1:N  |
| ACa07 | 19 | #### | .         | A | C | . | PA:PRKACA   | exonic   | NM_.      | mis PRKAC   |
| ACa07 | 19 | #### | .         | C | G | . | PA:WIZ      | intronic | NM_.      | .           |
| ACa07 | 19 | #### | .         | C | T | . | PA:OR10H2   | exonic   | NM_.      | syr OR10H   |
| ACa07 | 19 | #### | .         | G | A | . | PA:KLF2     | exonic   | NM_.      | mis KLF2:N  |
| ACa07 | 19 | #### | rs1015670 | G | A | . | PA:EPS15L1  | intronic | NM_.      | .           |
| ACa07 | 19 | #### | .         | C | T | . | PA:CPAMD8   | intronic | NM_.      | .           |
| ACa07 | 19 | #### | rs1138422 | G | A | . | PA:MYO9B    | intronic | NM_.      | .           |
| ACa07 | 19 | #### | .         | T | C | . | PA:OCEL1    | intronic | NM_.      | .           |
| ACa07 | 19 | #### | rs9290443 | G | A | . | PA:USHBP1   | exonic   | NM_.      | mis USHBP   |
| ACa07 | 19 | #### | rs7698270 | G | A | . | PA:GTPBP3   | exonic   | NM_.      | syr GTPBP   |
| ACa07 | 19 | #### | rs1043222 | C | T | . | PA:UNC13A   | exonic   | NM_.      | mis UNC13.  |
| ACa07 | 19 | #### | .         | T | C | . | PA:UNC13A   | intronic | NM_.      | .           |
| ACa07 | 19 | #### | .         | G | T | . | PA:MAST3    | intronic | NM_.      | .           |
| ACa07 | 19 | #### | .         | C | T | . | PA:PDE4C    | exonic   | NM_.      | mis PDE4C   |
| ACa07 | 19 | #### | rs3719294 | C | T | . | PA:UPF1     | exonic   | NM_.      | syr UPF1:N  |
| ACa07 | 19 | #### | rs2012753 | C | T | . | PA:MAU2     | exonic   | NM_.      | syr MAU2:N  |
| ACa07 | 19 | #### | .         | C | A | . | PA:ZNF90    | exonic   | NM_.      | syr ZNF90:  |
| ACa07 | 19 | #### | .         | T | C | . | PA:.        | intergen | NM_dist=. | .           |
| ACa07 | 19 | #### | .         | T | C | . | PA:ZNF492   | intronic | NM_.      | .           |
| ACa07 | 19 | #### | .         | C | T | . | PA:PLEKHF1  | intronic | NM_.      | .           |
| ACa07 | 19 | #### | rs7540203 | C | T | . | PA:TSHZ3    | exonic   | NM_.      | mis TSHZ3:  |
| ACa07 | 19 | #### | rs3754283 | C | T | . | PA:KIAA0355 | exonic   | NM_.      | mis KIAA03  |
| ACa07 | 19 | #### | .         | C | G | . | PA:GPI      | intronic | NM_.      | .           |
| ACa07 | 19 | #### | .         | A | C | . | PA:CD22     | intronic | NM_.      | .           |
| ACa07 | 19 | #### | rs7656023 | G | A | . | PA:RBM42    | exonic   | NM_.      | mis RBM42   |
| ACa07 | 19 | #### | .         | G | A | . | PA:WDR62    | intronic | NM_.      | .           |
| ACa07 | 19 | #### | .         | T | C | . | PA:ZNF146   | UTR5     | NM_NM_.   | .           |
| ACa07 | 19 | #### | rs5581240 | C | T | . | PA:ZNF529   | UTR3     | NM_NM_.   | .           |
| ACa07 | 19 | #### | .         | C | T | . | PA:.        | intergen | NR_dist=. | .           |
| ACa07 | 19 | #### | rs4806419 | C | A | . | PA:.        | intergen | NR_dist=. | .           |
| ACa07 | 19 | #### | rs7125437 | C | G | . | PA:.        | intergen | NR_dist=. | .           |
| ACa07 | 19 | #### | .         | C | T | . | PA:.        | intergen | NR_dist=. | .           |
| ACa07 | 19 | #### | rs7728313 | G | A | . | PA:.        | downstr  | NM_.      | .           |
| ACa07 | 19 | #### | .         | G | T | . | PA:SIPA1L3  | exonic   | NM_.      | unl UNKNC   |
| ACa07 | 19 | #### | rs1476199 | C | T | . | PA:CATSPER  | exonic   | NM_.      | mis CATSP   |
| ACa07 | 19 | #### | .         | C | T | . | PA:RASGRP2  | intronic | NM_.      | .           |
| ACa07 | 19 | #### | rs3756003 | G | A | . | PA:RYR1     | intronic | NM_.      | .           |
| ACa07 | 19 | #### | rs5371432 | A | G | . | PA:RYR1     | intronic | NM_.      | .           |
| ACa07 | 19 | #### | .         | G | A | . | PA:MAP4K1   | intronic | NM_.      | .           |

|       |    |      |           |   |   |   |             |          |           |     |         |
|-------|----|------|-----------|---|---|---|-------------|----------|-----------|-----|---------|
| ACa07 | 19 | #### | .         | C | A | . | PA:HNRNPL   | intronic | NM_.      | .   | .       |
| ACa07 | 19 | #### | rs5721273 | A | G | . | PA:SIRT2    | intronic | NM_.      | .   | .       |
| ACa07 | 19 | #### | rs8917290 | G | A | . | PA:IFNL4    | exonic   | NM_.      | unl | UNKNC   |
| ACa07 | 19 | #### | .         | T | C | . | PA:.        | intergen | NM_dist=. | .   | .       |
| ACa07 | 19 | #### | rs7564368 | G | A | . | PA:CLC      | UTR3     | NM_NM_.   | .   | .       |
| ACa07 | 19 | #### | rs7738579 | G | A | . | PA:DYRK1B   | exonic   | NM_.      | unl | UNKNC   |
| ACa07 | 19 | #### | .         | G | A | . | PA:FCGBP    | intronic | NM_.      | .   | .       |
| ACa07 | 19 | #### | rs7469641 | G | A | . | PA:SHKBP1   | exonic   | NM_.      | mis | SHKBP   |
| ACa07 | 19 | #### | .         | C | T | . | PA:SHKBP1   | intronic | NM_.      | .   | .       |
| ACa07 | 19 | #### | .         | G | A | . | PA:.        | upstream | NM_.      | .   | .       |
| ACa07 | 19 | #### | .         | C | T | . | PA:LTBP4    | exonic   | NM_.      | unl | UNKNC   |
| ACa07 | 19 | #### | .         | C | T | . | PA:LTBP4    | exonic   | NM_.      | unl | UNKNC   |
| ACa07 | 19 | #### | .         | C | A | . | PA:NUMBL    | intronic | NM_.      | .   | .       |
| ACa07 | 19 | #### | rs1045293 | G | C | . | PA:C19orf54 | exonic   | NM_.      | mis | C19orf5 |
| ACa07 | 19 | #### | .         | G | T | . | PA:HNRNPUL  | exonic   | NM_.      | unl | UNKNC   |
| ACa07 | 19 | #### | .         | G | T | . | PA:TGFB1    | exonic   | NM_.      | mis | TGFB1:  |
| ACa07 | 19 | #### | .         | C | T | . | PA:ARHGEF1  | exonic   | NM_.      | mis | ARHGE   |
| ACa07 | 19 | #### | .         | C | A | . | PA:MEGF8    | exonic   | NM_.      | mis | MEGF8   |
| ACa07 | 19 | #### | .         | C | A | . | PA:CEACAM1  | exonic   | NM_.      | sto | CEACA   |
| ACa07 | 19 | #### | .         | T | C | . | PA:PSG3     | intronic | NM_.      | .   | .       |
| ACa07 | 19 | #### | .         | C | T | . | PA:.        | intergen | NM_dist=. | .   | .       |
| ACa07 | 19 | #### | .         | G | A | . | PA:IRGQ     | exonic   | NM_.      | syr | IRGQ:N  |
| ACa07 | 19 | #### | .         | T | G | . | PA:ZNF155   | intronic | NM_.      | .   | .       |
| ACa07 | 19 | #### | .         | G | T | . | PA:ZNF285   | exonic   | NM_.      | mis | ZNF285  |
| ACa07 | 19 | #### | rs7737032 | C | T | . | PA:ZNF229   | exonic   | NM_.      | unl | UNKNC   |
| ACa07 | 19 | #### | rs9075637 | C | T | . | PA:IGSF23   | intronic | NM_.      | .   | .       |
| ACa07 | 19 | #### | .         | C | T | . | PA:CEACAM1  | intronic | NM_.      | .   | .       |
| ACa07 | 19 | #### | rs5632226 | C | T | . | PA:CEACAM1  | intronic | NM_.      | .   | .       |
| ACa07 | 19 | #### | .         | C | T | . | PA:BCL3     | exonic   | NM_.      | syr | BCL3:N  |
| ACa07 | 19 | #### | .         | C | A | . | PA:BCAM     | exonic   | NM_.      | mis | BCAM:I  |
| ACa07 | 19 | #### | .         | T | C | . | PA:TOMM40   | intronic | NM_.      | .   | .       |
| ACa07 | 19 | #### | .         | G | T | . | PA:GPR4     | exonic   | NM_.      | mis | GPR4:N  |
| ACa07 | 19 | #### | rs1026645 | C | T | . | PA:PRKD2    | exonic   | NM_.      | mis | PRKD2   |
| ACa07 | 19 | #### | rs3697415 | C | T | . | PA:STRN4    | exonic   | NM_.      | mis | STRN4   |
| ACa07 | 19 | #### | .         | G | A | . | PA:SLC8A2   | intronic | NM_.      | .   | .       |
| ACa07 | 19 | #### | .         | G | A | . | PA:CRX      | intronic | NM_.      | .   | .       |
| ACa07 | 19 | #### | .         | C | T | . | PA:.        | intergen | NM_dist=. | .   | .       |
| ACa07 | 19 | #### | rs6213000 | C | G | . | PA:.        | intergen | NR_dist=. | .   | .       |
| ACa07 | 19 | #### | .         | G | A | . | PA:SPHK2    | exonic   | NM_.      | mis | SPHK2:  |
| ACa07 | 19 | #### | rs1012379 | G | A | . | PA:PLEKHA4  | intronic | NM_.      | .   | .       |
| ACa07 | 19 | #### | .         | G | A | . | PA:SNRNP70  | intronic | NM_.      | .   | .       |
| ACa07 | 19 | #### | .         | A | G | . | PA:SNRNP70  | intronic | NM_.      | .   | .       |
| ACa07 | 19 | #### | rs5626072 | C | T | . | PA:DKKL1    | intronic | NM_.      | .   | .       |
| ACa07 | 19 | #### | .         | C | T | . | PA:CCDC155  | intronic | NM_.      | .   | .       |
| ACa07 | 19 | #### | .         | G | T | . | PA:RCN3     | intronic | NM_.      | .   | .       |
| ACa07 | 19 | #### | rs7508901 | C | T | . | PA:CPT1C    | intronic | NM_.      | .   | .       |
| ACa07 | 19 | #### | rs3749564 | G | A | . | PA:MYH14    | exonic   | NM_.      | mis | MYH14   |
| ACa07 | 19 | #### | rs2001122 | G | A | . | PA:NR1H2    | UTR5     | NM_NM_.   | .   | .       |
| ACa07 | 19 | #### | .         | G | A | . | PA:POLD1    | intronic | NM_.      | .   | .       |
| ACa07 | 19 | #### | rs5643823 | T | G | . | PA:POLD1    | intronic | NM_.      | .   | .       |
| ACa07 | 19 | #### | rs3695357 | C | T | . | PA:POLD1    | intronic | NM_.      | .   | .       |
| ACa07 | 19 | #### | .         | G | A | . | PA:.        | upstream | NM_.      | .   | .       |
| ACa07 | 19 | #### | rs7738602 | G | A | . | PA:MYBPC2   | exonic   | NM_.      | mis | MYBPC   |
| ACa07 | 19 | #### | .         | G | A | . | PA:MYBPC2   | splicing | NM_NM_.   | .   | .       |

|       |    |      |           |   |   |   |              |            |           |             |
|-------|----|------|-----------|---|---|---|--------------|------------|-----------|-------------|
| ACa07 | 19 | #### | .         | A | G | . | PA:GPR32     | exonic     | NM_.      | syr GPR32:  |
| ACa07 | 19 | #### | .         | T | C | . | PA:ZNF816    | exonic     | NM_.      | mis ZNF816  |
| ACa07 | 19 | #### | .         | A | G | . | PA:ERVV-2    | exonic     | NM_.      | syr ERVV-2  |
| ACa07 | 19 | #### | rs1420234 | T | G | . | PA:VN1R4     | exonic     | NM_.      | syr VN1R4:  |
| ACa07 | 19 | #### | .         | G | A | . | PA:MIR527    | ncRNA_NR_. | .         | .           |
| ACa07 | 19 | #### | .         | T | G | . | PA:CACNG8    | exonic     | NM_.      | mis CACNG   |
| ACa07 | 19 | #### | .         | T | C | . | PA:PRPF31    | intronic   | NM_.      | .           |
| ACa07 | 19 | #### | .         | G | A | . | PA:LENG1     | intronic   | NM_.      | .           |
| ACa07 | 19 | #### | rs3704562 | G | A | . | PA:LILRA6,LI | intronic   | NM_.      | .           |
| ACa07 | 19 | #### | .         | C | A | . | PA:TTYH1     | intronic   | NM_.      | .           |
| ACa07 | 19 | #### | rs7529171 | G | A | . | PA:KIR3DX1   | ncRNA_NR_. | .         | .           |
| ACa07 | 19 | #### | .         | G | T | . | PA:SYT5      | intronic   | NM_.      | .           |
| ACa07 | 19 | #### | rs3707427 | C | T | . | PA:TMEM190   | exonic     | NM_.      | mis TMEM1   |
| ACa07 | 19 | #### | rs2000514 | G | A | . | PA:NLRP13    | exonic     | NM_.      | mis NLRP1:  |
| ACa07 | 19 | #### | rs7704358 | C | T | . | PA:PEG3      | exonic     | NM_.      | syr PEG3:N  |
| ACa07 | 19 | #### | .         | G | A | . | PA:ZNF773    | intronic   | NM_.      | .           |
| ACa07 | 19 | #### | .         | G | A | . | PA:ZIK1      | intronic   | NM_.      | .           |
| ACa07 | 19 | #### | rs1474253 | C | T | . | PA:ZNF606    | exonic     | NM_.      | syr ZNF606  |
| ACa07 | 19 | #### | .         | C | T | . | PA:ZNF135    | UTR5       | NM_NM_.   | .           |
| ACa07 | 19 | #### | rs3733248 | C | T | . | PA:A1BG      | intronic   | NM_.      | .           |
| ACa07 | 20 | #### | rs1021538 | C | T | . | PA:SIRPA     | exonic     | NM_.      | mis SIRPA:l |
| ACa07 | 20 | #### | rs7627114 | T | C | . | PA:TGM6      | intronic   | NM_.      | .           |
| ACa07 | 20 | #### | .         | G | A | . | PA:NOP56     | intronic   | NM_.      | .           |
| ACa07 | 20 | #### | rs8672082 | C | T | . | PA:C20orf194 | intronic   | NM_.      | .           |
| ACa07 | 20 | #### | .         | C | T | . | PA:GFRA4     | intronic   | NM_.      | .           |
| ACa07 | 20 | #### | rs7638624 | G | A | . | PA:ADAM33    | exonic     | NM_.      | sto ADAM3   |
| ACa07 | 20 | #### | .         | C | T | . | PA:PRND      | UTR3       | NM_NM_.   | .           |
| ACa07 | 20 | #### | rs1032256 | G | A | . | PA:.         | intergen   | NR_dist=. | .           |
| ACa07 | 20 | #### | .         | T | C | . | PA:KIF16B    | intronic   | NM_.      | .           |
| ACa07 | 20 | #### | .         | A | G | . | PA:CSRP2BP   | exonic     | NM_.      | mis CSRP2   |
| ACa07 | 20 | #### | .         | T | C | . | PA:LINC0085  | ncRNA_NR_. | .         | .           |
| ACa07 | 20 | #### | rs1509219 | G | A | . | PA:CST4      | exonic     | NM_.      | mis CST4:N  |
| ACa07 | 20 | #### | .         | T | C | . | PA:ABHD12    | intronic   | NM_.      | .           |
| ACa07 | 20 | #### | .         | C | T | . | PA:FAM182B   | ncRNA_NR_. | .         | .           |
| ACa07 | 20 | #### | .         | C | T | . | PA:FRG1B     | ncRNA_NR_. | .         | .           |
| ACa07 | 20 | #### | .         | G | A | . | PA:FRG1B     | ncRNA_NR_. | .         | .           |
| ACa07 | 20 | #### | rs1845841 | C | T | . | PA:NOL4L     | exonic     | NM_.      | mis NOL4L:  |
| ACa07 | 20 | #### | .         | C | A | . | PA:BPIFB3    | intronic   | NM_.      | .           |
| ACa07 | 20 | #### | .         | G | T | . | PA:ZNF341    | intronic   | NM_.      | .           |
| ACa07 | 20 | #### | .         | G | A | . | PA:PIGU      | intronic   | NM_.      | .           |
| ACa07 | 20 | #### | rs7460506 | A | T | . | PA:TRPC4AP   | intronic   | NM_.      | .           |
| ACa07 | 20 | #### | .         | A | C | . | PA:CEP250    | UTR3       | NM_NM_.   | .           |
| ACa07 | 20 | #### | rs1480471 | C | T | . | PA:NFS1      | exonic     | NM_.      | mis NFS1:N  |
| ACa07 | 20 | #### | rs5431099 | T | C | . | PA:RBM39     | UTR5       | NM_NM_.   | .           |
| ACa07 | 20 | #### | .         | G | A | . | PA:EPB41L1   | intronic   | NM_.      | .           |
| ACa07 | 20 | #### | .         | G | A | . | PA:DLGAP4    | intronic   | NM_.      | .           |
| ACa07 | 20 | #### | rs8798536 | G | A | . | PA:NDRG3     | UTR5       | NM_NM_.   | .           |
| ACa07 | 20 | #### | .         | G | T | . | PA:MROH8     | intronic   | NM_.      | .           |
| ACa07 | 20 | #### | rs9848856 | C | T | . | PA:RPRD1B    | intronic   | NM_.      | .           |
| ACa07 | 20 | #### | rs9460302 | G | A | . | PA:DHX35     | exonic     | NM_.      | mis DHX35:  |
| ACa07 | 20 | #### | rs3711048 | G | A | . | PA:DHX35     | UTR3       | NM_NM_.   | .           |
| ACa07 | 20 | #### | .         | G | A | . | PA:TOP1      | exonic     | NM_.      | mis TOP1:N  |
| ACa07 | 20 | #### | .         | C | T | . | PA:PLCG1     | exonic     | NM_.      | mis PLCG1:  |
| ACa07 | 20 | #### | .         | G | A | . | PA:PTPRT     | exonic     | NM_.      | sto PTPRT   |

|       |    |      |           |   |   |   |            |           |           |     |         |
|-------|----|------|-----------|---|---|---|------------|-----------|-----------|-----|---------|
| ACa07 | 20 | #### | rs3761522 | G | A | . | PA:PTPRT   | exonic    | NM_       | syr | PTPRT   |
| ACa07 | 20 | #### | .         | T | C | . | PA:WISP2   | intronic  | NM_       | .   | .       |
| ACa07 | 20 | #### | .         | G | T | . | PA:WFDC12  | intronic  | NM_       | .   | .       |
| ACa07 | 20 | #### | .         | C | A | . | PA:SLC12A5 | intronic  | NM_       | .   | .       |
| ACa07 | 20 | #### | .         | G | T | . | PA:ELMO2   | intronic  | NM_       | .   | .       |
| ACa07 | 20 | #### | .         | G | T | . | PA:SLC13A3 | intronic  | NM_       | .   | .       |
| ACa07 | 20 | #### | .         | C | T | . | PA:ZMYND8  | exonic    | NM_       | mis | ZMYND   |
| ACa07 | 20 | #### | .         | G | A | . | PA:KCNG1   | exonic    | NM_       | mis | KCNG1   |
| ACa07 | 20 | #### | .         | C | T | . | PA:ATP9A   | intronic  | NM_       | .   | .       |
| ACa07 | 20 | #### | .         | G | A | . | PA:ZFP64   | intronic  | NM_       | .   | .       |
| ACa07 | 20 | #### | rs8891302 | C | T | . | PA:ZNF217  | exonic    | NM_       | syr | ZNF217  |
| ACa07 | 20 | #### | rs8669651 | T | C | . | PA:.       | intergen  | NM_dist=  | .   | .       |
| ACa07 | 20 | #### | .         | G | A | . | PA:GNAS    | exonic    | NM_       | mis | GNAS:1  |
| ACa07 | 20 | #### | .         | C | T | . | PA:GNAS    | exonic    | NM_       | mis | GNAS:1  |
| ACa07 | 20 | #### | .         | G | A | . | PA:SYCP2   | intronic  | NM_       | .   | .       |
| ACa07 | 20 | #### | rs7702464 | C | T | . | PA:LSM14B  | exonic    | NM_       | mis | LSM14B  |
| ACa07 | 20 | #### | rs7787907 | C | T | . | PA:COL9A3  | intronic  | NM_       | .   | .       |
| ACa07 | 20 | #### | rs1813756 | G | A | . | PA:COL9A3  | intronic  | NM_       | .   | .       |
| ACa07 | 20 | #### | rs1435421 | G | A | . | PA:ARFGAP1 | exonic    | NM_       | syr | ARFGA   |
| ACa07 | 20 | #### | .         | C | T | . | PA:.       | downstr   | NM_       | .   | .       |
| ACa07 | 20 | #### | .         | A | G | . | PA:SRMS    | intronic  | NM_       | .   | .       |
| ACa07 | 20 | #### | rs5462318 | G | A | . | PA:ABHD16B | exonic    | NM_       | mis | ABHD1   |
| ACa07 | 21 | #### | rs7962225 | A | G | . | PA:.       | intergen  | NOI dist= | .   | .       |
| ACa07 | 21 | #### | .         | C | T | . | PA:.       | downstr   | NR_       | .   | .       |
| ACa07 | 21 | #### | .         | G | A | . | PA:.       | intergen  | NR_dist=  | .   | .       |
| ACa07 | 21 | #### | .         | C | A | . | PA:.       | intergen  | NR_dist=  | .   | .       |
| ACa07 | 21 | #### | rs8680295 | G | A | . | PA:.       | intergen  | NR_dist=  | .   | .       |
| ACa07 | 21 | #### | rs3711086 | C | A | . | PA:.       | intergen  | NR_dist=  | .   | .       |
| ACa07 | 21 | #### | rs3775054 | C | T | . | PA:.       | intergen  | NR_dist=  | .   | .       |
| ACa07 | 21 | #### | .         | G | A | . | PA:TPTE    | intronic  | NM_       | .   | .       |
| ACa07 | 21 | #### | .         | C | A | . | PA:TPTE    | exonic    | NM_       | unl | UNKNC   |
| ACa07 | 21 | #### | rs5282430 | G | C | . | PA:BAGE5,B | intronic  | NM_       | .   | .       |
| ACa07 | 21 | #### | .         | C | T | . | PA:.       | intergen  | NM_dist=  | .   | .       |
| ACa07 | 21 | #### | rs665796  | T | C | . | PA:.       | intergen  | NM_dist=  | .   | .       |
| ACa07 | 21 | #### | rs6582845 | C | T | . | PA:.       | intergen  | NM_dist=  | .   | .       |
| ACa07 | 21 | #### | rs915519  | G | C | . | PA:.       | intergen  | NM_dist=  | .   | .       |
| ACa07 | 21 | #### | .         | C | T | . | PA:ANKRD30 | ncRNA_NR_ | .         | .   | .       |
| ACa07 | 21 | #### | .         | T | C | . | PA:.       | intergen  | NR_dist=  | .   | .       |
| ACa07 | 21 | #### | .         | A | G | . | PA:NCAM2   | intronic  | NM_       | .   | .       |
| ACa07 | 21 | #### | .         | C | G | . | PA:JAM2    | intronic  | NM_       | .   | .       |
| ACa07 | 21 | #### | .         | A | G | . | PA:APP     | intronic  | NM_       | .   | .       |
| ACa07 | 21 | #### | rs9172671 | C | T | . | PA:MIR5009 | ncRNA_NR_ | .         | .   | .       |
| ACa07 | 21 | #### | .         | C | T | . | PA:KRTAP23 | exonic    | NM_       | mis | KRTAP   |
| ACa07 | 21 | #### | .         | A | G | . | PA:HUNK    | intronic  | NM_       | .   | .       |
| ACa07 | 21 | #### | .         | G | T | . | PA:HUNK    | intronic  | NM_       | .   | .       |
| ACa07 | 21 | #### | rs1034062 | C | T | . | PA:SYNJ1   | exonic    | NM_       | syr | SYNJ1:  |
| ACa07 | 21 | #### | .         | C | T | . | PA:OLIG1   | exonic    | NM_       | syr | OLIG1:l |
| ACa07 | 21 | #### | rs7587939 | A | G | . | PA:IFNAR1  | intronic  | NM_       | .   | .       |
| ACa07 | 21 | #### | .         | C | T | . | PA:ITSN1   | intronic  | NM_       | .   | .       |
| ACa07 | 21 | #### | .         | T | G | . | PA:LOC1001 | ncRNA_NR_ | .         | .   | .       |
| ACa07 | 21 | #### | .         | C | T | . | PA:.       | intergen  | NM_dist=  | .   | .       |
| ACa07 | 21 | #### | rs5585229 | C | T | . | PA:TTC3    | intronic  | NM_       | .   | .       |
| ACa07 | 21 | #### | rs7591033 | G | A | . | PA:PSMG1   | UTR5      | NM_NM_    | .   | .       |
| ACa07 | 21 | #### | rs7585989 | C | T | . | PA:BRWD1   | exonic    | NM_       | mis | BRWD1   |

|       |    |      |   |           |   |   |             |            |           |           |         |         |
|-------|----|------|---|-----------|---|---|-------------|------------|-----------|-----------|---------|---------|
| ACa07 | 21 | #### | . | C         | A | . | PA:IGSF5    | intronic   | NM_.      | .         | .       |         |
| ACa07 | 21 | #### | . | C         | A | . | PA:DSCAM    | exonic     | NM_.      | syr       | DSCAM   |         |
| ACa07 | 21 | #### | . | T         | C | . | PA:DSCAM    | exonic     | NM_.      | syr       | DSCAM   |         |
| ACa07 | 21 | #### | . | G         | A | . | PA:DSCAM    | exonic     | NM_.      | mis       | DSCAM   |         |
| ACa07 | 21 | #### | . | T         | C | . | PA:DSCAM    | exonic     | NM_.      | mis       | DSCAM   |         |
| ACa07 | 21 | #### | . | C         | T | . | PA:FAM3B    | intronic   | NM_.      | .         | .       |         |
| ACa07 | 21 | #### | . | T         | C | . | PA:PRDM15   | intronic   | NM_.      | .         | .       |         |
| ACa07 | 21 | #### | . | rs9464977 | G | A | .           | PA:C2CD2   | intronic  | NM_.      | .       | .       |
| ACa07 | 21 | #### | . | G         | A | . | PA:ZBTB21   | exonic     | NM_.      | mis       | ZBTB21  |         |
| ACa07 | 21 | #### | . | T         | C | . | PA:SLC37A1  | intronic   | NM_.      | .         | .       |         |
| ACa07 | 21 | #### | . | rs1014361 | C | A | .           | PA:U2AF1   | intronic  | NM_.      | .       | .       |
| ACa07 | 21 | #### | . | rs7806447 | G | A | .           | PA:RRP1    | intronic  | NM_.      | .       | .       |
| ACa07 | 21 | #### | . | rs5662670 | C | T | .           | PA:PWP2    | exonic    | NM_.      | mis     | PWP2:1  |
| ACa07 | 21 | #### | . | rs9852755 | C | T | .           | PA:TRPM2   | intronic  | NM_.      | .       | .       |
| ACa07 | 21 | #### | . | rs7565454 | G | A | .           | PA:ITGB2   | exonic    | NM_.      | mis     | ITGB2:1 |
| ACa07 | 21 | #### | . | rs7582548 | C | T | .           | PA:SLC19A1 | exonic    | NM_.      | syr     | SLC19A1 |
| ACa07 | 21 | #### | . | rs3771590 | C | T | .           | PA:COL6A1  | intronic  | NM_.      | .       | .       |
| ACa07 | 21 | #### | . | G         | A | . | PA:FTCD     | intronic   | NM_.      | .         | .       |         |
| ACa07 | 21 | #### | . | G         | A | . | PA:C21orf58 | intronic   | NM_.      | .         | .       |         |
| ACa07 | 21 | #### | . | rs7517144 | G | A | .           | PA:PCNT    | exonic    | NM_.      | mis     | PCNT:1  |
| ACa07 | 21 | #### | . | G         | A | . | PA:DIP2A    | exonic     | NM_.      | mis       | DIP2A:1 |         |
| ACa07 | 22 | #### | . | rs2845112 | A | G | .           | PA:.       | intergen  | NR_dist=. | .       | .       |
| ACa07 | 22 | #### | . | rs8790424 | C | G | .           | PA:POTEH   | intronic  | NM_.      | .       | .       |
| ACa07 | 22 | #### | . | A         | G | . | PA:POTEH    | intronic   | NM_.      | .         | .       |         |
| ACa07 | 22 | #### | . | rs1248470 | C | A | .           | PA:.       | intergen  | NM_dist=. | .       | .       |
| ACa07 | 22 | #### | . | G         | A | . | PA:GAB4     | intronic   | NM_.      | .         | .       |         |
| ACa07 | 22 | #### | . | rs5555078 | G | A | .           | PA:DGCR2   | exonic    | NM_.      | syr     | DGCR2   |
| ACa07 | 22 | #### | . | T         | A | . | PA:DGCR2    | intronic   | NM_.      | .         | .       |         |
| ACa07 | 22 | #### | . | rs1899538 | G | A | .           | PA:.       | intergen  | NM_dist=. | .       | .       |
| ACa07 | 22 | #### | . | C         | A | . | PA:.        | intergen   | NM_dist=. | .         | .       |         |
| ACa07 | 22 | #### | . | G         | A | . | PA:.        | downstr    | NM_.      | .         | .       |         |
| ACa07 | 22 | #### | . | rs3714923 | G | A | .           | PA:PI4KA   | exonic    | NM_.      | syr     | PI4KA:1 |
| ACa07 | 22 | #### | . | rs7724279 | G | A | .           | PA:HIC2    | exonic    | NM_.      | syr     | HIC2:1  |
| ACa07 | 22 | #### | . | G         | A | . | PA:.        | intergen   | NR_dist=. | .         | .       |         |
| ACa07 | 22 | #### | . | rs3777336 | G | A | .           | PA:.       | intergen  | NM_dist=. | .       | .       |
| ACa07 | 22 | #### | . | rs3681295 | C | T | .           | PA:SMARCB1 | intronic  | NM_.      | .       | .       |
| ACa07 | 22 | #### | . | G         | T | . | PA:SUSD2    | exonic     | NM_.      | mis       | SUSD2   |         |
| ACa07 | 22 | #### | . | C         | T | . | PA:ADORA2A  | exonic     | NM_.      | mis       | ADORA2A |         |
| ACa07 | 22 | #### | . | G         | T | . | PA:UPB1     | intronic   | NM_.      | .         | .       |         |
| ACa07 | 22 | #### | . | rs7723316 | G | A | .           | PA:GGT1    | exonic    | NM_.      | mis     | GGT1:1  |
| ACa07 | 22 | #### | . | C         | T | . | PA:POM121L  | ncRNA_NR_. | .         | .         | .       |         |
| ACa07 | 22 | #### | . | C         | T | . | PA:.        | intergen   | NR_dist=. | .         | .       |         |
| ACa07 | 22 | #### | . | rs1925641 | C | T | .           | PA:EMID1   | intronic  | NM_.      | .       | .       |
| ACa07 | 22 | #### | . | T         | C | . | PA:SEC14L4  | UTR3       | NM_NM_.   | .         | .       |         |
| ACa07 | 22 | #### | . | G         | A | . | PA:OSBP2    | intronic   | NM_.      | .         | .       |         |
| ACa07 | 22 | #### | . | rs5710568 | G | A | .           | PA:SMTN    | intronic  | NM_.      | .       | .       |
| ACa07 | 22 | #### | . | rs1015431 | C | T | .           | PA:PIK3IP1 | intronic  | NM_.      | .       | .       |
| ACa07 | 22 | #### | . | G         | A | . | PA:SFI1     | exonic     | NM_.      | syr       | SFI1:1  |         |
| ACa07 | 22 | #### | . | T         | C | . | PA:.        | intergen   | NR_dist=. | .         | .       |         |
| ACa07 | 22 | #### | . | T         | C | . | PA:RTCB     | intronic   | NM_.      | .         | .       |         |
| ACa07 | 22 | #### | . | G         | A | . | PA:LARGE    | intronic   | NM_.      | .         | .       |         |
| ACa07 | 22 | #### | . | rs1379196 | C | T | .           | PA:MCM5    | exonic    | NM_.      | syr     | MCM5:1  |
| ACa07 | 22 | #### | . | C         | T | . | PA:MYH9     | UTR3       | NM_NM_.   | .         | .       |         |
| ACa07 | 22 | #### | . | rs3682304 | G | A | .           | PA:CSF2RB  | exonic    | NM_.      | mis     | CSF2RB  |

|       |    |      |           |   |   |   |             |          |           |     |         |
|-------|----|------|-----------|---|---|---|-------------|----------|-----------|-----|---------|
| ACa07 | 22 | #### | rs5367410 | C | T | . | PA:TEX33    | intronic | NM_.      | .   | .       |
| ACa07 | 22 | #### | .         | G | A | . | PA:PLA2G6   | exonic   | NM_.      | sto | PLA2G6  |
| ACa07 | 22 | #### | .         | C | A | . | PA:MAFF     | intronic | NM_.      | .   | .       |
| ACa07 | 22 | #### | rs7523833 | A | G | . | PA:TMEM184  | intronic | NM_.      | .   | .       |
| ACa07 | 22 | #### | .         | G | A | . | PA:KCNJ4    | exonic   | NM_.      | mi  | KCNJ4:  |
| ACa07 | 22 | #### | .         | G | A | . | PA:KCNJ4    | exonic   | NM_.      | mi  | KCNJ4:  |
| ACa07 | 22 | #### | rs5714435 | C | T | . | PA:GTPBP1   | intronic | NM_.      | .   | .       |
| ACa07 | 22 | #### | .         | C | T | . | PA:APOBEC3  | exonic   | NM_.      | syr | APOBE   |
| ACa07 | 22 | #### | rs3719126 | C | T | . | PA:CACNA1I  | intronic | NM_.      | .   | .       |
| ACa07 | 22 | #### | .         | C | T | . | PA:TNRC6B   | exonic   | NM_.      | mi  | TNRC6   |
| ACa07 | 22 | #### | rs2016059 | G | A | . | PA:MCHR1    | exonic   | NM_.      | mi  | MCHR1   |
| ACa07 | 22 | #### | .         | C | T | . | PA:POLR3H   | exonic   | NM_.      | mi  | POLR3   |
| ACa07 | 22 | #### | rs1838128 | C | T | . | PA:POLR3H   | exonic   | NM_.      | mi  | POLR3   |
| ACa07 | 22 | #### | .         | C | A | . | PA:CENPM    | intronic | NM_.      | .   | .       |
| ACa07 | 22 | #### | .         | G | A | . | PA:RRP7A    | intronic | NM_.      | .   | .       |
| ACa07 | 22 | #### | rs1916812 | C | T | . | PA:EFCAB6   | intronic | NM_.      | .   | .       |
| ACa07 | 22 | #### | .         | G | A | . | PA:PNPLA3   | intronic | NM_.      | .   | .       |
| ACa07 | 22 | #### | rs5584935 | C | T | . | PA:KIAA0930 | intronic | NM_.      | .   | .       |
| ACa07 | 22 | #### | rs1305515 | C | T | . | PA:FAM118A  | intronic | NM_.      | .   | .       |
| ACa07 | 22 | #### | .         | C | T | . | PA:SMC1B    | intronic | NM_.      | .   | .       |
| ACa07 | 22 | #### | .         | A | G | . | PA:FBLN1    | splicing | NM_NM_.   | .   | .       |
| ACa07 | 22 | #### | .         | T | C | . | PA:ATXN10   | intronic | NM_.      | .   | .       |
| ACa07 | 22 | #### | .         | G | A | . | PA:PKDREJ   | exonic   | NM_.      | syr | PKDRE   |
| ACa07 | 22 | #### | .         | G | A | . | PA:CELSR1   | exonic   | NM_.      | mi  | CELSR   |
| ACa07 | 22 | #### | .         | C | A | . | PA:IL17REL  | intronic | NM_.      | .   | .       |
| ACa07 | 22 | #### | .         | C | A | . | PA:MOV10L1  | intronic | NM_.      | .   | .       |
| ACa07 | 22 | #### | rs5595729 | G | A | . | PA:MOV10L1  | exonic   | NM_.      | syr | MOV10   |
| ACa07 | 22 | #### | .         | G | A | . | PA:PANX2    | intronic | NM_.      | .   | .       |
| ACa07 | 22 | #### | .         | G | A | . | PA:PANX2    | exonic   | NM_.      | syr | PANX2:  |
| ACa07 | 22 | #### | rs3705843 | C | T | . | PA:PLXNB2   | exonic   | NM_.      | syr | PLXNB:  |
| ACa07 | 22 | #### | .         | G | A | . | PA:PPP6R2   | intronic | NM_.      | .   | .       |
| ACa07 | 22 | #### | .         | C | T | . | PA:NCAPH2   | exonic   | NM_.      | mi  | NCAPH   |
| ACa07 | 22 | #### | rs9805300 | C | T | . | PA:MAPK8IP2 | intronic | NM_.      | .   | .       |
| ACa07 | X  | #### | .         | A | G | . | PA:ASMT     | intronic | NM_.      | .   | .       |
| ACa07 | X  | #### | .         | T | G | . | PA:CD99     | UTR3     | NM_NM_.   | .   | .       |
| ACa07 | X  | #### | .         | A | C | . | PA:ARSE     | intronic | NM_.      | .   | .       |
| ACa07 | X  | #### | .         | T | C | . | PA:NLGN4X   | UTR3     | NM_NM_.   | .   | .       |
| ACa07 | X  | #### | .         | T | C | . | PA:LOC10028 | exonic   | NM_.      | syr | LOC100  |
| ACa07 | X  | #### | .         | G | T | . | PA:FRMPD4   | intronic | NM_.      | .   | .       |
| ACa07 | X  | #### | .         | C | T | . | PA:EGFL6    | intronic | NM_.      | .   | .       |
| ACa07 | X  | #### | .         | C | T | . | PA:NHS      | exonic   | NM_.      | mi  | NHS:NM  |
| ACa07 | X  | #### | .         | G | A | . | PA:CNKSR2   | intronic | NM_.      | .   | .       |
| ACa07 | X  | #### | rs3730298 | C | T | . | PA:APOO     | exonic   | NM_.      | mi  | APOO:f  |
| ACa07 | X  | #### | .         | C | T | . | PA:ARX      | exonic   | NM_.      | syr | ARX:NM  |
| ACa07 | X  | #### | .         | T | C | . | PA:.        | intergen | NR_dist=. | .   | .       |
| ACa07 | X  | #### | .         | C | T | . | PA:MAGEB1C  | intronic | NM_.      | .   | .       |
| ACa07 | X  | #### | .         | T | A | . | PA:IL1RAPL1 | intronic | NM_.      | .   | .       |
| ACa07 | X  | #### | .         | C | A | . | PA:MAGEB1   | exonic   | NM_.      | syr | MAGEE   |
| ACa07 | X  | #### | .         | G | A | . | PA:GK       | UTR5     | NM_NM_.   | .   | .       |
| ACa07 | X  | #### | .         | T | C | . | PA:GK       | intronic | NM_.      | .   | .       |
| ACa07 | X  | #### | .         | A | C | . | PA:DMD      | intronic | NM_.      | .   | .       |
| ACa07 | X  | #### | .         | A | C | . | PA:.        | intergen | NM_dist=. | .   | .       |
| ACa07 | X  | #### | .         | A | C | . | PA:SRPX     | intronic | NM_.      | .   | .       |
| ACa07 | X  | #### | .         | G | A | . | PA:CXorf38  | exonic   | NM_.      | syr | CXorf38 |

|       |   |      |           |   |   |   |             |           |           |     |        |
|-------|---|------|-----------|---|---|---|-------------|-----------|-----------|-----|--------|
| ACa07 | X | #### | .         | G | A | . | PA:EFHC2    | intronic  | NM_       | .   | .      |
| ACa07 | X | #### | .         | C | T | . | PA:.        | intergen  | NR_dist=  | .   | .      |
| ACa07 | X | #### | .         | G | T | . | PA:SSX5     | intronic  | NM_       | .   | .      |
| ACa07 | X | #### | rs7825839 | C | T | . | PA:PQBP1    | intronic  | NM_       | .   | .      |
| ACa07 | X | #### | rs3679315 | G | A | . | PA:OTUD5    | exonic    | NM_       | mis | OTUD5  |
| ACa07 | X | #### | rs1871040 | C | T | . | PA:WDR45    | exonic    | NM_       | mis | WDR45  |
| ACa07 | X | #### | .         | G | T | . | PA:MAGIX    | intronic  | NM_       | .   | .      |
| ACa07 | X | #### | .         | G | A | . | PA:PRICKLE3 | intronic  | NM_       | .   | .      |
| ACa07 | X | #### | rs7822715 | C | T | . | PA:CACNA1F  | exonic    | NM_       | syr | CACNA  |
| ACa07 | X | #### | .         | C | T | . | PA:AKAP4    | exonic    | NM_       | syr | AKAP4: |
| ACa07 | X | #### | .         | G | A | . | PA:MAGED1   | exonic    | NM_       | mis | MAGED  |
| ACa07 | X | #### | .         | G | A | . | PA:.        | intergen  | NM_dist=  | .   | .      |
| ACa07 | X | #### | rs7825371 | C | T | . | PA:KDM5C    | exonic    | NM_       | mis | KDM5C  |
| ACa07 | X | #### | .         | G | T | . | PA:IQSEC2   | intronic  | NM_       | .   | .      |
| ACa07 | X | #### | .         | A | C | . | PA:SMC1A    | exonic    | NM_       | mis | SMC1A  |
| ACa07 | X | #### | .         | G | T | . | PA:HUWE1    | exonic    | NM_       | mis | HUWE1  |
| ACa07 | X | #### | .         | T | C | . | PA:FAM120C  | intronic  | NM_       | .   | .      |
| ACa07 | X | #### | .         | C | T | . | PA:FGD1     | splicing  | NM_NM_    | .   | .      |
| ACa07 | X | #### | .         | G | A | . | PA:GNL3L    | intronic  | NM_       | .   | .      |
| ACa07 | X | #### | rs9617788 | A | G | . | PA:ITIH6    | intronic  | NM_       | .   | .      |
| ACa07 | X | #### | .         | T | G | . | PA:.        | intergen  | NOI dist= | .   | .      |
| ACa07 | X | #### | .         | G | C | . | PA:.        | intergen  | NOI dist= | .   | .      |
| ACa07 | X | #### | .         | A | G | . | PA:.        | intergen  | NOI dist= | .   | .      |
| ACa07 | X | #### | rs7124105 | C | A | . | PA:.        | intergen  | NOI dist= | .   | .      |
| ACa07 | X | #### | .         | A | G | . | PA:.        | intergen  | NOI dist= | .   | .      |
| ACa07 | X | #### | rs3765099 | T | G | . | PA:.        | intergen  | NOI dist= | .   | .      |
| ACa07 | X | #### | .         | T | C | . | PA:.        | intergen  | NOI dist= | .   | .      |
| ACa07 | X | #### | .         | T | G | . | PA:.        | intergen  | NOI dist= | .   | .      |
| ACa07 | X | #### | .         | A | C | . | PA:.        | intergen  | NOI dist= | .   | .      |
| ACa07 | X | #### | .         | G | A | . | PA:.        | intergen  | NOI dist= | .   | .      |
| ACa07 | X | #### | .         | C | A | . | PA:.        | intergen  | NM_dist=  | .   | .      |
| ACa07 | X | #### | .         | C | A | . | PA:STARD8   | intronic  | NM_       | .   | .      |
| ACa07 | X | #### | rs7687527 | G | A | . | PA:.        | intergen  | NM_dist=  | .   | .      |
| ACa07 | X | #### | .         | G | C | . | PA:ARR3     | intronic  | NM_       | .   | .      |
| ACa07 | X | #### | rs7507300 | C | T | . | PA:MED12    | exonic    | NM_       | mis | MED12  |
| ACa07 | X | #### | rs8632249 | C | T | . | PA:GJB1     | exonic    | NM_       | mis | GJB1:N |
| ACa07 | X | #### | rs7685308 | G | A | . | PA:BCYRN1   | ncRNA_NR_ | .         | .   |        |
| ACa07 | X | #### | .         | C | A | . | PA:BCYRN1   | ncRNA_NR_ | .         | .   |        |
| ACa07 | X | #### | .         | G | A | . | PA:HDAC8    | exonic    | NM_       | mis | HDAC8  |
| ACa07 | X | #### | .         | C | T | . | PA:PHKA1    | exonic    | NM_       | mis | PHKA1: |
| ACa07 | X | #### | .         | A | G | . | PA:CDX4     | exonic    | NM_       | syr | CDX4:N |
| ACa07 | X | #### | .         | G | A | . | PA:.        | intergen  | NM_dist=  | .   | .      |
| ACa07 | X | #### | .         | G | T | . | PA:.        | intergen  | NM_dist=  | .   | .      |
| ACa07 | X | #### | .         | C | A | . | PA:KIAA2022 | exonic    | NM_       | sto | KIAA20 |
| ACa07 | X | #### | .         | A | G | . | PA:.        | intergen  | NM_dist=  | .   | .      |
| ACa07 | X | #### | .         | C | T | . | PA:BRWD3    | exonic    | NM_       | mis | BRWD3  |
| ACa07 | X | #### | .         | G | A | . | PA:PCDH11X  | exonic    | NM_       | mis | PCDH1  |
| ACa07 | X | #### | .         | C | A | . | PA:PCDH11X  | exonic    | NM_       | mis | PCDH1  |
| ACa07 | X | #### | .         | C | T | . | PA:PCDH11X  | intronic  | NM_       | .   | .      |
| ACa07 | X | #### | .         | T | C | . | PA:PCDH11X  | intronic  | NM_       | .   | .      |
| ACa07 | X | #### | rs9672698 | G | A | . | PA:.        | intergen  | NR_dist=  | .   | .      |
| ACa07 | X | #### | .         | G | A | . | PA:NOX1     | exonic    | NM_       | mis | NOX1:N |
| ACa07 | X | #### | .         | C | A | . | PA:NXF5     | exonic    | NM_       | mis | NXF5:N |
| ACa07 | X | #### | .         | C | T | . | PA:TCEAL2   | intronic  | NM_       | .   | .      |

|        |    |      |           |   |   |   |             |           |           |     |         |
|--------|----|------|-----------|---|---|---|-------------|-----------|-----------|-----|---------|
| ACa07  | X  | #### | rs1507941 | C | T | . | PA:IL1RAPL2 | intronic  | NM_       | .   | .       |
| ACa07  | X  | #### | .         | G | A | . | PA:ACSL4    | UTR3      | NM_NM_    | .   | .       |
| ACa07  | X  | #### | .         | C | A | . | PA:LINC0128 | ncRNA_NR_ | .         | .   | .       |
| ACa07  | X  | #### | rs8664003 | T | C | . | PA:.        | intergen  | NR_dist=  | .   | .       |
| ACa07  | X  | #### | .         | C | T | . | PA:SLC25A5- | ncRNA_NR_ | .         | .   | .       |
| ACa07  | X  | #### | .         | C | T | . | PA:CUL4B    | intronic  | NM_       | .   | .       |
| ACa07  | X  | #### | .         | G | A | . | PA:.        | intergen  | NM_dist=  | .   | .       |
| ACa07  | X  | #### | rs1387255 | C | T | . | PA:ACTRT1   | exonic    | NM_       | mis | ACTRT   |
| ACa07  | X  | #### | .         | A | G | . | PA:ZNF280C  | intronic  | NM_       | .   | .       |
| ACa07  | X  | #### | .         | C | A | . | PA:GPC3     | intronic  | NM_       | .   | .       |
| ACa07  | X  | #### | .         | C | T | . | PA:SLC9A6   | intronic  | NM_       | .   | .       |
| ACa07  | X  | #### | .         | G | T | . | PA:GPR112   | intronic  | NM_       | .   | .       |
| ACa07  | X  | #### | .         | A | G | . | PA:ATP11C   | exonic    | NM_       | syr | ATP11C  |
| ACa07  | X  | #### | .         | G | A | . | PA:LDOC1,Sf | intergen  | NM_dist=  | .   | .       |
| ACa07  | X  | #### | .         | C | T | . | PA:MAGEA11  | exonic    | NM_       | syr | MAGEA   |
| ACa07  | X  | #### | rs7823749 | C | T | . | PA:CXorf40B | UTR3      | NM_NM_    | .   | .       |
| ACa07  | X  | #### | .         | G | A | . | PA:CNGA2    | exonic    | NM_       | mis | CNGA2   |
| ACa07  | X  | #### | rs3712627 | C | T | . | PA:.        | intergen  | NM_dist=  | .   | .       |
| ACa07  | X  | #### | .         | G | T | . | PA:BGN      | exonic    | NM_       | mis | BGN:NI  |
| ACa07  | X  | #### | .         | G | A | . | PA:ATP2B3   | intronic  | NM_       | .   | .       |
| ACa07  | X  | #### | rs7825278 | G | A | . | PA:SSR4     | intronic  | NM_       | .   | .       |
| ACa07  | X  | #### | .         | G | A | . | PA:L1CAM    | intronic  | NM_       | .   | .       |
| ACa07  | X  | #### | .         | G | A | . | PA:L1CAM    | intronic  | NM_       | .   | .       |
| ACa07  | X  | #### | .         | G | A | . | PA:RENBP    | splicing  | NM_NM_    | .   | .       |
| ACa07  | X  | #### | .         | C | T | . | PA:HCFC1    | intronic  | NM_       | .   | .       |
| ACa07  | X  | #### | .         | G | A | . | PA:SLC10A3  | exonic    | NM_       | syr | SLC10A  |
| ACa07  | X  | #### | rs7819487 | C | T | . | PA:G6PD     | exonic    | NM_       | mis | G6PD:NI |
| ACa07  | X  | #### | .         | C | T | . | PA:DKC1     | intronic  | NM_       | .   | .       |
| ACa07  | X  | #### | .         | G | A | . | PA:MPP1     | UTR5      | NM_NM_    | .   | .       |
| ACa07  | X  | #### | .         | G | A | . | PA:SMIM9    | UTR5      | NM_NM_    | .   | .       |
| ACa07  | X  | #### | .         | A | G | . | PA:TMLHE    | exonic    | NM_       | mis | TMLHE   |
| ACa07  | Y  | #### | .         | C | T | . | PA:.        | intergen  | NOI dist= | .   | .       |
| ACa07  | MT | 9459 | rs8791767 | C | T | . | PA:.        | intergen  | NOI dist= | .   | .       |
| ACa07  | MT | #### | .         | A | T | . | PA:.        | intergen  | NOI dist= | .   | .       |
| ACa07  | MT | #### | .         | T | C | . | PA:.        | intergen  | NOI dist= | .   | .       |
| ACaP01 | 1  | #### | rs5750552 | C | T | . | PA:NECAP2   | intronic  | NM_       | .   | .       |
| ACaP01 | 1  | #### | rs4101081 | C | T | . | PA:NBPF1    | intronic  | NM_       | .   | .       |
| ACaP01 | 1  | #### | rs7629862 | A | C | . | PA:NBPF1    | intronic  | NM_       | .   | .       |
| ACaP01 | 1  | #### | .         | T | C | . | PA:.        | intergen  | NR_dist=  | .   | .       |
| ACaP01 | 1  | #### | .         | C | A | . | PA:EIF4G3   | exonic    | NM_       | mis | EIF4G3  |
| ACaP01 | 1  | #### | rs3772379 | G | C | . | PA:.        | intergen  | NR_dist=  | .   | .       |
| ACaP01 | 1  | #### | rs3720400 | G | T | . | PA:.        | intergen  | NR_dist=  | .   | .       |
| ACaP01 | 1  | #### | rs6181337 | T | C | . | PA:NBPF25P  | ncRNA_NR_ | .         | .   | .       |
| ACaP01 | 1  | #### | .         | G | T | . | PA:.        | upstream  | NM_       | .   | .       |
| ACaP01 | 2  | #### | .         | G | T | . | PA:ELMOD3   | intronic  | NM_       | .   | .       |
| ACaP01 | 2  | #### | rs1649505 | G | C | . | PA:.        | intergen  | NOI dist= | .   | .       |
| ACaP01 | 3  | #### | rs7933313 | G | A | . | PA:EPHA6    | exonic    | NM_       | syr | EPHA6   |
| ACaP01 | 3  | #### | rs7480655 | C | T | . | PA:COL6A6   | exonic    | NM_       | syr | COL6A6  |
| ACaP01 | 3  | #### | .         | C | A | . | PA:TOPBP1   | exonic    | NM_       | mis | TOPBP   |
| ACaP01 | 4  | #### | .         | C | T | . | PA:.        | intergen  | NM_dist=  | .   | .       |
| ACaP01 | 5  | #### | rs671688  | A | G | . | PA:.        | intergen  | NM_dist=  | .   | .       |
| ACaP01 | 5  | #### | rs8681576 | G | T | . | PA:.        | intergen  | NR_dist=  | .   | .       |
| ACaP01 | 5  | #### | .         | T | C | . | PA:CLK4     | exonic    | NM_       | syr | CLK4:NI |
| ACaP01 | 6  | #### | .         | A | G | . | PA:SASH1    | intronic  | NM_       | .   | .       |



|         |    |      |           |   |   |   |              |           |          |     |         |
|---------|----|------|-----------|---|---|---|--------------|-----------|----------|-----|---------|
| ACaP01  | 7  | #### | .         | T | C | . | PA: AMPH     | intronic  | NM_      | .   | .       |
| ACaP01  | 7  | #### | .         | C | T | . | PA: .        | intergen  | NR_dist= | .   | .       |
| ACaP01  | 7  | #### | .         | C | T | . | PA: TFEC     | splicing  | NM_NM_   | .   | .       |
| ACaP01  | 7  | #### | rs1471823 | G | A | . | PA: GIMAP5,C | exonic    | NM_      | mi  | GIMAP!  |
| ACaP01  | 8  | #### | rs7496607 | G | A | . | PA: XPO7     | intronic  | NM_      | .   | .       |
| ACaP01  | 8  | #### | .         | C | T | . | PA: PIWIL2   | exonic    | NM_      | syr | PIWIL2  |
| ACaP01  | 9  | #### | rs1482733 | G | T | . | PA: .        | intergen  | NM_dist= | .   | .       |
| ACaP01  | 9  | #### | .         | G | T | . | PA: WDR34    | intronic  | NM_      | .   | .       |
| ACaP01  | 10 | #### | rs2020143 | T | C | . | PA: AGAP9    | exonic    | NM_      | mi  | AGAP9   |
| ACaP01  | 10 | #### | .         | A | C | . | PA: HPSE2    | exonic    | NM_      | mi  | HPSE2:  |
| ACaP01  | 11 | #### | rs7731324 | G | A | . | PA: CKAP5    | exonic    | NM_      | mi  | CKAP5:  |
| ACaP01  | 11 | #### | .         | A | T | . | PA: PRG2     | intronic  | NM_      | .   | .       |
| ACaP01  | 12 | #### | rs7734351 | G | A | . | PA: KMT2D    | exonic    | NM_      | syr | KMT2D   |
| ACaP01  | 12 | #### | rs7769669 | C | T | . | PA: KRT7     | exonic    | NM_      | mi  | KRT7:N  |
| ACaP01  | 14 | #### | .         | G | A | . | PA: JAG2     | exonic    | NM_      | syr | JAG2:N  |
| ACaP01  | 14 | #### | rs7157981 | C | T | . | PA: .        | intergen  | NR_dist= | .   | .       |
| ACaP01  | 15 | #### | rs2019940 | T | G | . | PA: GOLGA6L  | exonic    | NM_      | mi  | GOLGA   |
| ACaP01  | 15 | #### | rs3731461 | A | G | . | PA: GOLGA6L  | exonic    | NM_      | syr | GOLGA   |
| ACaP01  | 15 | #### | .         | C | A | . | PA: .        | downstr   | NR_      | .   | .       |
| ACaP01  | 15 | #### | .         | A | G | . | PA: .        | intergen  | NM_dist= | .   | .       |
| ACaP01  | 15 | #### | .         | C | A | . | PA: KIF23    | intronic  | NM_      | .   | .       |
| ACaP01  | 16 | #### | .         | C | T | . | PA: IL21R    | intronic  | NM_      | .   | .       |
| ACaP01  | 17 | #### | rs7781206 | T | C | . | PA: RPAIN    | intronic  | NM_      | .   | .       |
| ACaP01  | 17 | #### | rs3725436 | A | C | . | PA: .        | intergen  | NM_dist= | .   | .       |
| ACaP01  | 19 | #### | rs7861545 | G | A | . | PA: RHPN2    | exonic    | NM_      | sto | RHPN2   |
| ACaP01  | 19 | #### | .         | C | T | . | PA: FCGBP    | exonic    | NM_      | mi  | FCGBP   |
| ACaP01  | 19 | #### | .         | C | G | . | PA: AXL      | intronic  | NM_      | .   | .       |
| ACaP01  | 20 | #### | .         | A | T | . | PA: RP5-977B | ncRNA_NR_ | .        | .   | .       |
| ACaP01  | 21 | #### | rs9266067 | A | G | . | PA: .        | intergen  | NM_dist= | .   | .       |
| ACaP01X |    | #### | rs7663121 | G | A | . | PA: DMD      | exonic    | NM_      | syr | DMD:N   |
| ACaP01X |    | #### | rs3397828 | A | G | . | PA: BCYRN1   | ncRNA_NR_ | .        | .   | .       |
| ACaP02  | 1  | #### | .         | G | A | . | PA: SPEN     | intronic  | NM_      | .   | .       |
| ACaP02  | 1  | #### | rs436293  | C | T | . | PA: NBPF1    | intronic  | NM_      | .   | .       |
| ACaP02  | 1  | #### | .         | G | T | . | PA: COL16A1  | intronic  | NM_      | .   | .       |
| ACaP02  | 1  | #### | .         | G | C | . | PA: CCDC28B  | UTR3      | NM_NM_   | .   | .       |
| ACaP02  | 1  | #### | rs3721234 | C | T | . | PA: SASS6    | intronic  | NM_      | .   | .       |
| ACaP02  | 1  | #### | .         | G | A | . | PA: FNDC7    | intronic  | NM_      | .   | .       |
| ACaP02  | 1  | #### | rs2007574 | G | C | . | PA: NBPF20,N | intronic  | NM_      | .   | .       |
| ACaP02  | 1  | #### | rs9424724 | G | C | . | PA: NBPF25P  | ncRNA_NR_ | .        | .   | .       |
| ACaP02  | 1  | #### | .         | T | G | . | PA: .        | intergen  | NM_dist= | .   | .       |
| ACaP02  | 1  | #### | .         | G | A | . | PA: TMEM79   | exonic    | NM_      | syr | TMEM7   |
| ACaP02  | 1  | #### | .         | G | C | . | PA: C1orf85  | exonic    | NM_      | mi  | C1orf85 |
| ACaP02  | 1  | #### | .         | C | G | . | PA: SPTA1    | intronic  | NM_      | .   | .       |
| ACaP02  | 1  | #### | .         | G | C | . | PA: DARC     | UTR5      | NM_NM_   | .   | .       |
| ACaP02  | 1  | #### | .         | C | T | . | PA: DCAF8    | exonic    | NM_      | mi  | DCAF8:  |
| ACaP02  | 1  | #### | .         | G | C | . | PA: FCRLB    | intronic  | NM_      | .   | .       |
| ACaP02  | 1  | #### | .         | C | T | . | PA: SHCBP1L  | exonic    | NM_      | mi  | SHCBP   |
| ACaP02  | 1  | #### | rs9662955 | G | A | . | PA: CFHR5    | intronic  | NM_      | .   | .       |
| ACaP02  | 1  | #### | rs7570105 | G | A | . | PA: WNT3A    | exonic    | NM_      | mi  | WNT3A   |
| ACaP02  | 1  | #### | .         | C | G | . | PA: KIAA1804 | exonic    | NM_      | syr | KIAA18  |
| ACaP02  | 1  | #### | .         | G | A | . | PA: MTR      | intronic  | NM_      | .   | .       |
| ACaP02  | 1  | #### | .         | C | T | . | PA: FMN2     | UTR3      | NM_NM_   | .   | .       |
| ACaP02  | 2  | #### | .         | C | T | . | PA: GALM     | intronic  | NM_      | .   | .       |
| ACaP02  | 2  | #### | rs1420196 | G | A | . | PA: ABCG5    | exonic    | NM_      | mi  | ABCG5   |

|        |   |      |           |   |   |   |            |            |           |     |          |
|--------|---|------|-----------|---|---|---|------------|------------|-----------|-----|----------|
| ACaP02 | 2 | #### | .         | T | C | . | PA:LYPD6B  | intronic   | NM_.      | .   | .        |
| ACaP02 | 2 | #### | .         | C | T | . | PA:TANC1   | exonic     | NM_.      | mis | TANC1:   |
| ACaP02 | 2 | #### | .         | C | G | . | PA:SLC39A1 | exonic     | NM_.      | mis | SLC39A1: |
| ACaP02 | 2 | #### | rs1857895 | C | T | . | PA:HSPD1   | intronic   | NM_.      | .   | .        |
| ACaP02 | 2 | #### | .         | G | C | . | PA:KLF7    | intronic   | NM_.      | .   | .        |
| ACaP02 | 2 | #### | .         | G | T | . | PA:WDFY1   | intronic   | NM_.      | .   | .        |
| ACaP02 | 2 | #### | .         | G | C | . | PA:MROH2A  | exonic     | NM_.      | mis | MROH2A:  |
| ACaP02 | 2 | #### | rs7784676 | G | A | . | PA:STK25   | exonic     | NM_.      | mis | STK25:   |
| ACaP02 | 3 | #### | .         | G | C | . | PA:UBP1    | intronic   | NM_.      | .   | .        |
| ACaP02 | 3 | #### | .         | A | G | . | PA:CRYBG3  | intronic   | NM_.      | .   | .        |
| ACaP02 | 3 | #### | .         | G | T | . | PA:CEP63   | exonic     | NM_.      | mis | CEP63:   |
| ACaP02 | 3 | #### | .         | G | A | . | PA:CEP63   | exonic     | NM_.      | mis | CEP63:   |
| ACaP02 | 3 | #### | .         | G | C | . | PA:ARMC8,N | intronic   | NM_.      | .   | .        |
| ACaP02 | 3 | #### | rs7462149 | G | A | . | PA:GOLIM4  | exonic     | NM_.      | sto | GOLIM4:  |
| ACaP02 | 3 | #### | .         | G | C | . | PA:TNFSF10 | UTR5       | NM_NM_.   | .   | .        |
| ACaP02 | 3 | #### | rs1048860 | G | A | . | PA:PIK3CA  | exonic     | NM_.      | mis | PIK3CA:  |
| ACaP02 | 3 | #### | .         | A | C | . | PA:YEATS2  | exonic     | NM_.      | mis | YEATS2:  |
| ACaP02 | 4 | #### | .         | C | T | . | PA:TMEM175 | intronic   | NM_.      | .   | .        |
| ACaP02 | 4 | #### | .         | G | A | . | PA:SMARCA1 | exonic     | NM_.      | mis | SMARCA1: |
| ACaP02 | 4 | #### | .         | C | T | . | PA:CYP2U1  | intronic   | NM_.      | .   | .        |
| ACaP02 | 4 | #### | .         | C | T | . | PA:NAA15   | exonic     | NM_.      | mis | NAA15:   |
| ACaP02 | 4 | #### | .         | C | G | . | PA:INPP4B  | exonic     | NM_.      | mis | INPP4B:  |
| ACaP02 | 4 | #### | .         | C | T | . | PA:.       | downstr    | NR_.      | .   | .        |
| ACaP02 | 5 | #### | rs1876921 | G | C | . | PA:SLC45A2 | intronic   | NM_.      | .   | .        |
| ACaP02 | 5 | #### | .         | G | C | . | PA:RNF180  | exonic     | NM_.      | mis | RNF180:  |
| ACaP02 | 5 | #### | .         | C | T | . | PA:F2R     | exonic     | NM_.      | mis | F2R:NM   |
| ACaP02 | 5 | #### | rs7956159 | C | T | . | PA:SEC24A  | exonic     | NM_.      | mis | SEC24A:  |
| ACaP02 | 5 | #### | .         | C | G | . | PA:FAM71B  | exonic     | NM_.      | mis | FAM71B:  |
| ACaP02 | 5 | #### | .         | G | A | . | PA:HMMR    | exonic     | NM_.      | syr | HMMR:    |
| ACaP02 | 5 | #### | .         | G | A | . | PA:KCNIP1  | exonic     | NM_.      | mis | KCNIP1:  |
| ACaP02 | 6 | #### | .         | C | A | . | PA:MYLK4   | intronic   | NM_.      | .   | .        |
| ACaP02 | 6 | #### | .         | A | G | . | PA:SYCP2L  | exonic     | NM_.      | mis | SYCP2L:  |
| ACaP02 | 6 | #### | .         | G | A | . | PA:BTN1A1  | intronic   | NM_.      | .   | .        |
| ACaP02 | 6 | #### | rs1787910 | C | T | . | PA:HLA-A   | intronic   | NM_.      | .   | .        |
| ACaP02 | 6 | #### | rs5364899 | A | G | . | PA:HLA-L   | ncRNA_NR_. | .         | .   |          |
| ACaP02 | 6 | #### | .         | C | G | . | PA:EYS     | exonic     | NM_.      | mis | EYS:NM   |
| ACaP02 | 6 | #### | .         | C | T | . | PA:EYS     | exonic     | NM_.      | mis | EYS:NM   |
| ACaP02 | 6 | #### | .         | C | T | . | PA:.       | intergen   | NM_dist=. | .   | .        |
| ACaP02 | 6 | #### | .         | C | G | . | PA:KIF25   | intronic   | NM_.      | .   | .        |
| ACaP02 | 7 | #### | .         | G | C | . | PA:TNRC18  | UTR3       | NM_NM_.   | .   | .        |
| ACaP02 | 7 | #### | .         | C | A | . | PA:.       | intergen   | NR_dist=. | .   | .        |
| ACaP02 | 7 | #### | .         | C | A | . | PA:ZNF804B | intronic   | NM_.      | .   | .        |
| ACaP02 | 7 | #### | .         | C | T | . | PA:.       | downstr    | NR_.      | .   | .        |
| ACaP02 | 7 | #### | rs3685111 | G | C | . | PA:CREB3L2 | intronic   | NM_.      | .   | .        |
| ACaP02 | 8 | #### | .         | G | A | . | PA:KIF13B  | intronic   | NM_.      | .   | .        |
| ACaP02 | 8 | #### | .         | A | T | . | PA:PREX2   | exonic     | NM_.      | mis | PREX2:   |
| ACaP02 | 8 | #### | .         | G | A | . | PA:SNTB1   | UTR3       | NM_NM_.   | .   | .        |
| ACaP02 | 8 | #### | .         | C | T | . | PA:NAPRT1  | exonic     | NM_.      | mis | NAPRT1:  |
| ACaP02 | 8 | #### | rs3743103 | C | T | . | PA:PLEC    | exonic     | NM_.      | mis | PLEC:NM  |
| ACaP02 | 9 | #### | rs4928838 | C | T | . | PA:.       | intergen   | NM_dist=. | .   | .        |
| ACaP02 | 9 | #### | .         | G | A | . | PA:.       | intergen   | NM_dist=. | .   | .        |
| ACaP02 | 9 | #### | .         | G | A | . | PA:PHF2    | exonic     | NM_.      | syr | PHF2:NM  |
| ACaP02 | 9 | #### | .         | C | T | . | PA:AKNA    | intronic   | NM_.      | .   | .        |
| ACaP02 | 9 | #### | .         | T | A | . | PA:DDX31   | intronic   | NM_.      | .   | .        |

|        |    |      |           |   |   |   |              |           |           |     |         |
|--------|----|------|-----------|---|---|---|--------------|-----------|-----------|-----|---------|
| ACaP02 | 10 | #### | .         | C | T | . | PA:DIP2C     | exonic    | NM_       | mis | DIP2C:l |
| ACaP02 | 10 | #### | .         | G | A | . | PA:PFKP      | intronic  | NM_       | .   | .       |
| ACaP02 | 10 | #### | rs3128226 | C | G | . | PA:NUTM2A    | intronic  | NM_       | .   | .       |
| ACaP02 | 10 | #### | .         | G | C | . | PA:KNDC1     | intronic  | NM_       | .   | .       |
| ACaP02 | 11 | #### | .         | C | T | . | PA:.         | intergen  | NM_dist=  | .   | .       |
| ACaP02 | 11 | #### | .         | C | G | . | PA:NAV2      | intronic  | NM_       | .   | .       |
| ACaP02 | 11 | #### | .         | C | T | . | PA:GYLTL1B   | exonic    | NM_       | syr | GYLTL'  |
| ACaP02 | 11 | #### | .         | G | A | . | PA:.         | upstream  | NM_       | .   | .       |
| ACaP02 | 11 | #### | .         | G | A | . | PA:TENM4     | exonic    | NM_       | syr | TENM4   |
| ACaP02 | 11 | #### | .         | G | A | . | PA:SIK3      | intronic  | NM_       | .   | .       |
| ACaP02 | 11 | #### | .         | G | A | . | PA:.         | upstream  | NM_       | .   | .       |
| ACaP02 | 12 | #### | rs5382343 | T | C | . | PA:.         | intergen  | NOI dist= | .   | .       |
| ACaP02 | 12 | #### | .         | A | G | . | PA:ATF7IP    | exonic    | NM_       | mis | ATF7IP  |
| ACaP02 | 12 | #### | .         | C | G | . | PA:SMCO2     | exonic    | NM_       | mis | SMCO2   |
| ACaP02 | 12 | #### | rs8658204 | T | A | . | PA:XPOT      | intronic  | NM_       | .   | .       |
| ACaP02 | 12 | #### | .         | C | T | . | PA:PTPRQ     | intronic  | NM_       | .   | .       |
| ACaP02 | 12 | #### | .         | G | A | . | PA:NAA25     | exonic    | NM_       | syr | NAA25:  |
| ACaP02 | 12 | #### | rs7707492 | G | A | . | PA:NOS1      | exonic    | NM_       | mis | NOS1:N  |
| ACaP02 | 13 | #### | .         | T | A | . | PA:UBL3      | intronic  | NM_       | .   | .       |
| ACaP02 | 13 | #### | rs3702294 | G | A | . | PA:FRY       | exonic    | NM_       | mis | FRY:NM  |
| ACaP02 | 13 | #### | rs4129275 | C | T | . | PA:FREM2     | exonic    | NM_       | mis | FREM2   |
| ACaP02 | 13 | #### | .         | C | G | . | PA:FREM2     | exonic    | NM_       | mis | FREM2   |
| ACaP02 | 13 | #### | .         | C | T | . | PA:PCDH20    | exonic    | NM_       | mis | PCDH2   |
| ACaP02 | 13 | #### | .         | C | G | . | PA:SLAIN1    | intronic  | NM_       | .   | .       |
| ACaP02 | 13 | #### | .         | C | G | . | PA:SLAIN1    | exonic    | NM_       | mis | SLAIN1  |
| ACaP02 | 13 | #### | .         | G | A | . | PA:CCDC168   | exonic    | NM_       | mis | CCDC1   |
| ACaP02 | 14 | #### | rs3699116 | C | T | . | PA:.         | intergen  | NM_dist=  | .   | .       |
| ACaP02 | 14 | #### | rs7660001 | C | T | . | PA:RALGAPA   | ncRNA_NR_ | .         | .   | .       |
| ACaP02 | 14 | #### | .         | C | T | . | PA:BTBD7     | exonic    | NM_       | syr | BTBD7:  |
| ACaP02 | 14 | #### | .         | G | A | . | PA:CLMN      | splicing  | NM_NM_    | .   | .       |
| ACaP02 | 14 | #### | rs1214345 | C | T | . | PA:AKT1      | exonic    | NM_       | mis | AKT1:N  |
| ACaP02 | 14 | #### | .         | G | A | . | PA:.         | intergen  | NR_dist=  | .   | .       |
| ACaP02 | 15 | #### | rs4932010 | G | A | . | PA:HERC2P3   | ncRNA_NR_ | .         | .   | .       |
| ACaP02 | 15 | #### | rs7494426 | C | G | . | PA:.         | intergen  | NR_dist=  | .   | .       |
| ACaP02 | 15 | #### | rs1079463 | T | C | . | PA:CXADRP2   | ncRNA_NR_ | .         | .   | .       |
| ACaP02 | 15 | #### | rs1823548 | G | C | . | PA:LOC33901  | intronic  | NM_       | .   | .       |
| ACaP02 | 15 | #### | .         | G | A | . | PA:.         | downstr   | NR_       | .   | .       |
| ACaP02 | 15 | #### | rs1861770 | C | T | . | PA:KNSTRN    | intronic  | NM_       | .   | .       |
| ACaP02 | 15 | #### | rs9953164 | G | A | . | PA:PATL2     | exonic    | NM_       | mis | PATL2:  |
| ACaP02 | 15 | #### | .         | G | C | . | PA:HMGN2P2   | ncRNA_NR_ | .         | .   | .       |
| ACaP02 | 15 | #### | .         | G | A | . | PA:GRAMD2    | intronic  | NM_       | .   | .       |
| ACaP02 | 15 | #### | .         | G | A | . | PA:ACSBG1    | intronic  | NM_       | .   | .       |
| ACaP02 | 15 | #### | .         | C | T | . | PA:.         | intergen  | NM_dist=  | .   | .       |
| ACaP02 | 16 | #### | .         | C | T | . | PA:CCDC64B   | exonic    | NM_       | mis | CCDC6   |
| ACaP02 | 16 | #### | .         | G | A | . | PA:.         | intergen  | NR_dist=  | .   | .       |
| ACaP02 | 16 | #### | rs7759203 | C | T | . | PA:OGFOD1    | exonic    | NM_       | mis | OGFOI   |
| ACaP02 | 16 | #### | .         | C | T | . | PA:VAC14-A5  | ncRNA_NR_ | .         | .   | .       |
| ACaP02 | 17 | #### | .         | G | C | . | PA:C17orf107 | exonic    | NM_       | mis | C17orf1 |
| ACaP02 | 17 | #### | rs7810711 | C | T | . | PA:GPR179    | exonic    | NM_       | mis | GPR17:  |
| ACaP02 | 17 | #### | rs1509595 | G | A | . | PA:DBF4B     | exonic    | NM_       | syr | DBF4B:  |
| ACaP02 | 17 | #### | .         | G | A | . | PA:HOXB8     | exonic    | NM_       | syr | HOXB8   |
| ACaP02 | 17 | #### | rs3742496 | C | T | . | PA:SYNGR2    | intronic  | NM_       | .   | .       |
| ACaP02 | 17 | #### | rs5611679 | C | T | . | PA:LOC10025  | ncRNA_NR_ | .         | .   | .       |
| ACaP02 | 17 | #### | rs5502840 | G | A | . | PA:NOTUM     | exonic    | NM_       | syr | NOTUM   |

|          |    |      |           |   |   |              |                  |     |         |
|----------|----|------|-----------|---|---|--------------|------------------|-----|---------|
| ACaP02   | 18 | #### | rs1996954 | C | T | PA: ANKRD20  | ncRNA_NR_        | .   | .       |
| ACaP02   | 18 | #### | .         | G | C | PA: ALPK2    | UTR3_NM_NM_      | .   | .       |
| ACaP02   | 19 | #### | .         | C | G | PA: .        | intergenNM_dist= | .   | .       |
| ACaP02   | 19 | #### | .         | G | A | PA: LSM4     | intronic_NM_     | .   | .       |
| ACaP02   | 19 | #### | .         | G | T | PA: SUGP1    | exonic_NM_       | mis | SUGP1   |
| ACaP02   | 19 | #### | .         | C | T | PA: ZNF506   | exonic_NM_       | mis | ZNF506  |
| ACaP02   | 19 | #### | .         | C | T | PA: ETV2     | intronic_NM_     | .   | .       |
| ACaP02   | 19 | #### | .         | C | G | PA: ZNF568   | exonic_NM_       | sto | ZNF568  |
| ACaP02   | 19 | #### | .         | G | A | PA: TTC9B    | exonic_NM_       | syr | TTC9B:  |
| ACaP02   | 19 | #### | .         | G | C | PA: PSG2     | intronic_NM_     | .   | .       |
| ACaP02   | 19 | #### | .         | C | G | PA: RDH13    | intronic_NM_     | .   | .       |
| ACaP02   | 20 | #### | .         | G | C | PA: TMEM74E  | intronic_NM_     | .   | .       |
| ACaP02   | 20 | #### | .         | G | A | PA: TGM6     | exonic_NM_       | syr | TGM6:†  |
| ACaP02   | 20 | #### | rs1438597 | G | A | PA: CDS2     | exonic_NM_       | mis | CDS2:†  |
| ACaP02   | 20 | #### | .         | G | C | PA: PDRG1    | intronic_NM_     | .   | .       |
| ACaP02   | 20 | #### | .         | T | C | PA: TGM2     | intronic_NM_     | .   | .       |
| ACaP02   | 21 | #### | rs1170118 | T | C | PA: BAGE4,B/ | intronic_NM_     | .   | .       |
| ACaP02   | 21 | #### | .         | C | G | PA: USP25    | exonic_NM_       | sto | USP25:  |
| ACaP02   | 22 | #### | .         | G | C | PA: ARVCF    | intronic_NM_     | .   | .       |
| ACaP02   | 22 | #### | .         | C | T | PA: OSBP2    | exonic_NM_       | mis | OSBP2   |
| ACaP02   | 22 | #### | .         | C | A | PA: EIF3L    | exonic_NM_       | syr | EIF3L:† |
| ACaP02X  |    | #### | rs7509188 | G | A | PA: ARSF     | exonic_NM_       | mis | ARSF:†  |
| ACaP02X  |    | #### | .         | G | A | PA: ARX      | exonic_NM_       | mis | ARX:†   |
| ACaP02X  |    | #### | .         | T | A | PA: .        | intergenNR_dist= | .   | .       |
| ACaP02X  |    | #### | .         | G | A | PA: KIF4A    | exonic_NM_       | mis | KIF4A:† |
| ACaP02X  |    | #### | .         | G | C | PA: NKAP     | exonic_NM_       | mis | NKAP:†  |
| ACaP02X  |    | #### | .         | T | A | PA: SRD5A1P  | ncRNA_NR_        | .   | .       |
| ACaP02X  |    | #### | .         | T | A | PA: SRD5A1P  | ncRNA_NR_        | .   | .       |
| ACaP02X  |    | #### | .         | G | C | PA: GABRA3   | intronic_NM_     | .   | .       |
| ACaP02X  |    | #### | .         | C | T | PA: IRAK1    | UTR3_NM_NM_      | .   | .       |
| ACaP02MT |    | #### | .         | T | C | PA: .        | intergenNO†dist= | .   | .       |
| ACaP03   | 1  | #### | rs1149286 | T | C | PA: SLC35E2  | intronic_NM_     | .   | .       |
| ACaP03   | 1  | #### | .         | C | A | PA: TMEM57   | exonic_NM_       | mis | TMEM5   |
| ACaP03   | 1  | #### | .         | C | T | PA: FPGT-TNI | intronic_NM_     | .   | .       |
| ACaP03   | 1  | #### | .         | G | A | PA: COL24A1  | exonic_NM_       | mis | COL24/  |
| ACaP03   | 1  | #### | rs1998147 | T | C | PA: FCGR1B   | UTR3_NM_NM_      | .   | .       |
| ACaP03   | 1  | #### | rs8662584 | G | T | PA: .        | intergenNR_dist= | .   | .       |
| ACaP03   | 2  | #### | .         | T | A | PA: SPTBN1   | intronic_NM_     | .   | .       |
| ACaP03   | 2  | #### | .         | G | A | PA: ETAA1    | exonic_NM_       | mis | ETAA1:  |
| ACaP03   | 2  | #### | .         | C | G | PA: TMSB10   | intronic_NM_     | .   | .       |
| ACaP03   | 2  | #### | rs3708851 | C | T | PA: GLI2     | exonic_NM_       | syr | GLI2:NI |
| ACaP03   | 2  | #### | rs2008806 | T | A | PA: R3HDM1   | intronic_NM_     | .   | .       |
| ACaP03   | 2  | #### | rs9042902 | C | T | PA: STK39    | intronic_NM_     | .   | .       |
| ACaP03   | 2  | #### | rs3702772 | C | T | PA: IGFBP5   | intronic_NM_     | .   | .       |
| ACaP03   | 2  | #### | rs5574456 | G | A | PA: TRPM8    | intronic_NM_     | .   | .       |
| ACaP03   | 3  | #### | rs1446637 | C | T | PA: MIR548A  | ncRNA_NR_        | .   | .       |
| ACaP03   | 3  | #### | .         | G | T | PA: .        | intergenNM_dist= | .   | .       |
| ACaP03   | 3  | #### | .         | C | T | PA: GRAMD1   | exonic_NM_       | syr | GRAM1   |
| ACaP03   | 3  | #### | rs2015548 | C | T | PA: DRD3     | exonic_NM_       | mis | DRD3:†  |
| ACaP03   | 4  | #### | rs1163261 | C | T | PA: RAB28    | intronic_NM_     | .   | .       |
| ACaP03   | 4  | #### | rs4695484 | C | G | PA: .        | intergenNM_dist= | .   | .       |
| ACaP03   | 4  | #### | rs4695485 | G | T | PA: .        | intergenNM_dist= | .   | .       |
| ACaP03   | 4  | #### | rs7496227 | C | T | PA: SMR3B    | exonic_NM_       | syr | SMR3B   |
| ACaP03   | 4  | #### | rs7758415 | G | A | PA: PDLIM3   | exonic_NM_       | mis | PDLIM3  |

|        |    |      |           |   |   |   |             |            |            |             |
|--------|----|------|-----------|---|---|---|-------------|------------|------------|-------------|
| ACaP03 | 5  | #### | .         | C | T | . | PA:PCDHA6   | exonic     | NM_.       | syr PCDHA   |
| ACaP03 | 6  | #### | rs1161907 | C | T | . | PA:EHMT2    | intronic   | NM_.       | .           |
| ACaP03 | 6  | #### | .         | G | T | . | PA:SENP6    | intronic   | NM_.       | .           |
| ACaP03 | 6  | #### | .         | T | A | . | PA:.        | intergen   | NM_dist=.  | .           |
| ACaP03 | 6  | #### | rs7577542 | C | T | . | PA:CDK19    | UTR3       | NM_NM_.    | .           |
| ACaP03 | 7  | #### | .         | G | A | . | PA:RBAKDN   | ncRNA_NR_. | .          | .           |
| ACaP03 | 7  | #### | .         | C | A | . | PA:ABCB1    | exonic     | NM_.       | mis ABCB1:  |
| ACaP03 | 7  | #### | .         | T | C | . | PA:FAM185A  | intronic   | NM_.       | .           |
| ACaP03 | 8  | #### | rs7722351 | C | T | . | PA:PCM1     | exonic     | NM_.       | syr PCM1:M  |
| ACaP03 | 8  | #### | .         | G | T | . | PA:PTK2     | intronic   | NM_.       | .           |
| ACaP03 | 9  | #### | rs7507213 | G | A | . | PA:TRAF2    | exonic     | NM_.       | mis TRAF2:  |
| ACaP03 | 10 | #### | .         | T | A | . | PA:LINC0071 | ncRNA_NR_. | .          | .           |
| ACaP03 | 10 | #### | rs7571508 | G | A | . | PA:ITGA8    | exonic     | NM_.       | syr ITGA8:I |
| ACaP03 | 10 | #### | rs5655237 | C | T | . | PA:.        | intergen   | NR_dist=.  | .           |
| ACaP03 | 10 | #### | rs7905448 | T | A | . | PA:MCU      | intronic   | NM_.       | .           |
| ACaP03 | 10 | #### | .         | G | A | . | PA:LINC0086 | ncRNA_NR_. | .          | .           |
| ACaP03 | 10 | #### | rs9706750 | C | T | . | PA:LOC10050 | ncRNA_NR_. | .          | .           |
| ACaP03 | 10 | #### | rs7723659 | A | G | . | PA:SFXN2    | intronic   | NM_.       | .           |
| ACaP03 | 10 | #### | .         | G | A | . | PA:INA      | exonic     | NM_.       | syr INA:NM  |
| ACaP03 | 10 | #### | rs1219134 | A | G | . | PA:FGFR2    | exonic     | NM_.       | mis FGFR2:  |
| ACaP03 | 11 | #### | .         | G | A | . | PA:DEAF1    | exonic     | NM_.       | mis DEAF1:  |
| ACaP03 | 11 | #### | rs5453728 | G | A | . | PA:USH1C    | exonic     | NM_.       | syr USH1C   |
| ACaP03 | 11 | #### | .         | A | G | . | PA:USH1C    | exonic     | NM_.       | syr USH1C   |
| ACaP03 | 11 | #### | .         | T | C | . | PA:ARHGEF1  | intronic   | NM_.       | .           |
| ACaP03 | 12 | #### | rs1030864 | T | C | . | PA:OAS1     | exonic     | NM_.       | mis OAS1:M  |
| ACaP03 | 13 | #### | .         | G | A | . | PA:RB1      | exonic     | NM_.       | syr RB1:NM  |
| ACaP03 | 13 | #### | rs9145408 | C | T | . | PA:.        | intergen   | NM_dist=.  | .           |
| ACaP03 | 13 | #### | rs9816818 | A | G | . | PA:.        | upstream   | NM_.       | .           |
| ACaP03 | 14 | #### | .         | G | T | . | PA:.        | upstream   | NM_.       | .           |
| ACaP03 | 14 | #### | .         | C | A | . | PA:NPAS3    | intronic   | NM_.       | .           |
| ACaP03 | 14 | #### | rs5634662 | G | A | . | PA:PRPF39   | exonic     | NM_.       | syr PRPF39  |
| ACaP03 | 14 | #### | .         | G | A | . | PA:ERO1L    | intronic   | NM_.       | .           |
| ACaP03 | 14 | #### | .         | G | A | . | PA:EML5     | exonic     | NM_.       | mis EML5:M  |
| ACaP03 | 14 | #### | .         | C | A | . | PA:HHIPL1   | exonic     | NM_.       | mis HHIPL1  |
| ACaP03 | 15 | #### | .         | G | T | . | PA:.        | intergen   | NOI dist=. | .           |
| ACaP03 | 15 | #### | rs7780894 | G | A | . | PA:.        | intergen   | NR_dist=.  | .           |
| ACaP03 | 15 | #### | .         | T | C | . | PA:MGA      | exonic     | NM_.       | mis MGA:NI  |
| ACaP03 | 15 | #### | .         | C | A | . | PA:TTBK2    | exonic     | NM_.       | mis TTBK2:  |
| ACaP03 | 16 | #### | .         | C | T | . | PA:SLC9A5   | exonic     | NM_.       | syr SLC9A5  |
| ACaP03 | 17 | #### | .         | A | T | . | PA:CCDC42   | intronic   | NM_.       | .           |
| ACaP03 | 17 | #### | rs5864828 | G | C | . | PA:FLJ36000 | ncRNA_NR_. | .          | .           |
| ACaP03 | 17 | #### | rs7798230 | G | A | . | PA:TTLL6    | intronic   | NM_.       | .           |
| ACaP03 | 18 | #### | .         | C | A | . | PA:EPB41L3  | intronic   | NM_.       | .           |
| ACaP03 | 19 | #### | rs7477304 | G | A | . | PA:CACNA1A  | exonic     | NM_.       | syr CACNA1A |
| ACaP03 | 19 | #### | .         | C | A | . | PA:OR7A10   | exonic     | NM_.       | syr OR7A10  |
| ACaP03 | 19 | #### | rs9472013 | T | C | . | PA:ZNF181   | intronic   | NM_.       | .           |
| ACaP03 | 19 | #### | .         | C | T | . | PA:APLP1    | exonic     | NM_.       | mis APLP1:  |
| ACaP03 | 19 | #### | .         | C | A | . | PA:KCNN4    | intronic   | NM_.       | .           |
| ACaP03 | 19 | #### | rs3718581 | C | T | . | PA:KLK11    | intronic   | NM_.       | .           |
| ACaP03 | 19 | #### | rs1056285 | C | T | . | PA:.        | intergen   | NM_dist=.  | .           |
| ACaP03 | 20 | #### | rs5584781 | T | A | . | PA:TMC2     | intronic   | NM_.       | .           |
| ACaP03 | 20 | #### | rs6037279 | C | A | . | PA:.        | intergen   | NR_dist=.  | .           |
| ACaP03 | 20 | #### | .         | G | C | . | PA:CEP250   | intronic   | NM_.       | .           |
| ACaP03 | 20 | #### | .         | G | A | . | PA:SLC12A5  | UTR5       | NM_NM_.    | .           |

|          |      |      |           |   |   |             |           |          |       |         |
|----------|------|------|-----------|---|---|-------------|-----------|----------|-------|---------|
| ACaP03   | 21   | #### | rs2013315 | C | T | PA:TPTE     | intronic  | NM_      | .     | .       |
| ACaP03   | 21   | #### | rs2001788 | G | A | PA:TPTE     | intronic  | NM_      | .     | .       |
| ACaP03   | 22   | #### | .         | G | A | PA:PKDREJ   | exonic    | NM_      | mis   | PKDRE   |
| ACaP03X  |      | #### | .         | G | T | PA:IRAK1    | exonic    | NM_      | sto   | IRAK1:f |
| ACaP03MT | 8177 | .    | .         | G | A | PA:.        | intergen  | NOI      | dist= | .       |
| ACaP03MT |      | #### | .         | G | A | PA:.        | intergen  | NOI      | dist= | .       |
| ACaP04   | 1    | #### | rs6263527 | T | A | PA:.        | intergen  | NR_dist= | .     | .       |
| ACaP04   | 1    | #### | .         | C | A | PA:PODN     | intronic  | NM_      | .     | .       |
| ACaP04   | 1    | #### | rs7457471 | C | G | PA:.        | intergen  | NR_dist= | .     | .       |
| ACaP04   | 1    | #### | .         | T | C | PA:POU2F1   | intronic  | NM_      | .     | .       |
| ACaP04   | 1    | #### | .         | C | A | PA:NID1     | intronic  | NM_      | .     | .       |
| ACaP04   | 2    | #### | .         | G | C | PA:.        | intergen  | NR_dist= | .     | .       |
| ACaP04   | 2    | #### | rs3711404 | G | A | PA:.        | intergen  | NR_dist= | .     | .       |
| ACaP04   | 2    | #### | .         | A | T | PA:ITGA4    | intronic  | NM_      | .     | .       |
| ACaP04   | 3    | #### | rs7758373 | T | C | PA:SDHAP1   | ncRNA_NR_ | .        | .     | .       |
| ACaP04   | 4    | #### | .         | T | A | PA:MXD4     | UTR3      | NM_NM_   | .     | .       |
| ACaP04   | 4    | #### | rs4694947 | T | G | PA:.        | intergen  | NM_dist= | .     | .       |
| ACaP04   | 9    | #### | .         | T | C | PA:TRPM3    | intronic  | NM_      | .     | .       |
| ACaP04   | 10   | #### | rs4070334 | G | A | PA:.        | intergen  | NR_dist= | .     | .       |
| ACaP04   | 12   | #### | rs9213947 | C | A | PA:OSBPL8   | intronic  | NM_      | .     | .       |
| ACaP04   | 14   | #### | rs1125033 | G | A | PA:SOS2     | intronic  | NM_      | .     | .       |
| ACaP04   | 14   | #### | .         | A | C | PA:EIF2B2   | intronic  | NM_      | .     | .       |
| ACaP04   | 15   | #### | rs2859043 | G | A | PA:GOLGA6L  | exonic    | NM_      | mis   | GOLGA   |
| ACaP04   | 15   | #### | .         | G | T | PA:LOC28368 | ncRNA_NR_ | .        | .     | .       |
| ACaP04   | 18   | #### | .         | G | A | PA:NOL4     | intronic  | NM_      | .     | .       |
| ACaP05   | 1    | #### | .         | A | C | PA:.        | intergen  | NR_dist= | .     | .       |
| ACaP05   | 1    | #### | rs2787778 | G | T | PA:.        | intergen  | NR_dist= | .     | .       |
| ACaP05   | 1    | #### | rs2787777 | C | T | PA:.        | intergen  | NR_dist= | .     | .       |
| ACaP05   | 2    | #### | rs3711404 | G | A | PA:.        | intergen  | NR_dist= | .     | .       |
| ACaP05   | 5    | #### | rs1997973 | G | T | PA:CDH12    | UTR3      | NM_NM_   | .     | .       |
| ACaP05   | 7    | #### | rs2018986 | T | C | PA:.        | intergen  | NR_dist= | .     | .       |
| ACaP05   | 7    | #### | .         | G | T | PA:.        | intergen  | NR_dist= | .     | .       |
| ACaP05   | 7    | #### | rs1390499 | G | C | PA:POLR2J3  | exonic    | NM_      | mis   | POLR2.  |
| ACaP05   | 8    | #### | rs2077351 | A | C | PA:.        | intergen  | NM_dist= | .     | .       |
| ACaP05   | 9    | #### | rs1136487 | C | A | PA:PTGER4P  | ncRNA_NR_ | .        | .     | .       |
| ACaP05   | 9    | #### | rs7648362 | A | G | PA:PGM5P2   | ncRNA_NR_ | .        | .     | .       |
| ACaP05   | 9    | #### | .         | G | C | PA:ZFAND5   | intronic  | NM_      | .     | .       |
| ACaP05   | 10   | #### | rs1995206 | C | T | PA:FAM21A,F | exonic    | NM_      | mis   | FAM21I  |
| ACaP05   | 11   | #### | rs3713518 | C | G | PA:.        | intergen  | NR_dist= | .     | .       |
| ACaP05   | 11   | #### | rs8790394 | A | T | PA:MAPK8IP  | UTR3      | NM_NM_   | .     | .       |
| ACaP05   | 17   | #### | rs1155611 | C | A | PA:FLJ36000 | ncRNA_NR_ | .        | .     | .       |
| ACaP05   | 18   | #### | rs2018600 | G | A | PA:SLC35G4  | exonic    | NM_      | mis   | SLC35C  |
| ACaP05   | 21   | #### | .         | G | A | PA:.        | intergen  | NR_dist= | .     | .       |
| ACaP05   | 21   | #### | rs8792017 | A | G | PA:.        | intergen  | NR_dist= | .     | .       |
| ACaP05   | 21   | #### | rs1043983 | A | T | PA:BAGE2,B/ | intronic  | NM_      | .     | .       |
| ACaP05X  |      | #### | rs1444677 | G | C | PA:.        | intergen  | NM_dist= | .     | .       |
| ACaP06   | 1    | #### | .         | G | A | PA:FAM41C   | ncRNA_NR_ | .        | .     | .       |
| ACaP06   | 1    | #### | .         | A | G | PA:NPHP4    | intronic  | NM_      | .     | .       |
| ACaP06   | 1    | #### | .         | C | A | PA:NPHP4    | intronic  | NM_      | .     | .       |
| ACaP06   | 1    | #### | .         | C | T | PA:TMEM201  | exonic    | NM_      | mis   | TMEM2   |
| ACaP06   | 1    | #### | .         | C | T | PA:PRAMEF1  | intronic  | NM_      | .     | .       |
| ACaP06   | 1    | #### | .         | G | T | PA:PRAMEF1  | intronic  | NM_      | .     | .       |
| ACaP06   | 1    | #### | .         | T | G | PA:PALMD    | UTR5      | NM_NM_   | .     | .       |
| ACaP06   | 1    | #### | rs3894786 | T | C | PA:.        | intergen  | NR_dist= | .     | .       |

|        |   |      |           |   |   |   |             |            |           |     |
|--------|---|------|-----------|---|---|---|-------------|------------|-----------|-----|
| ACaP06 | 1 | #### | rs1112760 | G | A | . | PA:.        | intergen   | NR_dist=. | .   |
| ACaP06 | 1 | #### | rs2017985 | G | A | . | PA:NBPF20   | intronic   | NM_.      | mis |
| ACaP06 | 1 | #### | rs3713084 | T | C | . | PA:NBPF20,N | intronic   | NM_.      | mis |
| ACaP06 | 1 | #### | rs8799710 | G | C | . | PA:NBPF8,NE | intronic   | NM_.      | mis |
| ACaP06 | 1 | #### | rs6699421 | A | G | . | PA:NBPF25P  | ncRNA_NR_. | .         | mis |
| ACaP06 | 1 | #### | rs8799669 | C | A | . | PA:NBPF25P  | ncRNA_NR_. | .         | mis |
| ACaP06 | 1 | #### | .         | C | G | . | PA:OTUD7B   | exonic     | NM_.      | mis |
| ACaP06 | 1 | #### | .         | C | G | . | PA:C1orf189 | intronic   | NM_.      | mis |
| ACaP06 | 1 | #### | rs4833528 | C | T | . | PA:RIT1     | exonic     | NM_.      | mis |
| ACaP06 | 1 | #### | rs8940723 | G | A | . | PA:RABGAP1  | intronic   | NM_.      | mis |
| ACaP06 | 1 | #### | rs7731705 | C | T | . | PA:CACNA1E  | intronic   | NM_.      | mis |
| ACaP06 | 2 | #### | .         | G | C | . | PA:RGPD1    | intronic   | NM_.      | mis |
| ACaP06 | 2 | #### | rs7781962 | G | T | . | PA:.        | intergen   | NR_dist=. | mis |
| ACaP06 | 2 | #### | rs2018517 | G | A | . | PA:LYG2     | exonic     | NM_.      | mis |
| ACaP06 | 2 | #### | .         | A | C | . | PA:SLC9A2   | exonic     | NM_.      | mis |
| ACaP06 | 2 | #### | rs7685255 | G | A | . | PA:EVX2     | exonic     | NM_.      | mis |
| ACaP06 | 2 | #### | rs7551300 | C | T | . | PA:CWC22    | exonic     | NM_.      | mis |
| ACaP06 | 3 | #### | rs6224264 | A | G | . | PA:RPSA     | exonic     | NM_.      | mis |
| ACaP06 | 3 | #### | .         | C | G | . | PA:ATP11B   | intronic   | NM_.      | mis |
| ACaP06 | 3 | #### | .         | G | A | . | PA:ABCC5    | exonic     | NM_.      | mis |
| ACaP06 | 3 | #### | .         | G | A | . | PA:HTR3C    | exonic     | NM_.      | mis |
| ACaP06 | 3 | #### | .         | T | G | . | PA:VPS8     | intronic   | NM_.      | mis |
| ACaP06 | 4 | #### | .         | C | G | . | PA:LEF1     | intronic   | NM_.      | mis |
| ACaP06 | 4 | #### | rs5742217 | T | C | . | PA:.        | intergen   | NM_dist=. | mis |
| ACaP06 | 4 | #### | rs5549088 | G | A | . | PA:VEGFC    | exonic     | NM_.      | mis |
| ACaP06 | 5 | #### | .         | G | A | . | PA:.        | intergen   | NR_dist=. | mis |
| ACaP06 | 5 | #### | rs3759258 | G | T | . | PA:.        | intergen   | NR_dist=. | mis |
| ACaP06 | 5 | #### | .         | C | T | . | PA:PTCD2    | exonic     | NM_.      | mis |
| ACaP06 | 5 | #### | .         | G | C | . | PA:ACSL6    | intronic   | NM_.      | mis |
| ACaP06 | 5 | #### | .         | G | A | . | PA:LEAP2    | intronic   | NM_.      | mis |
| ACaP06 | 5 | #### | .         | C | T | . | PA:EIF4E1B  | intronic   | NM_.      | mis |
| ACaP06 | 5 | #### | .         | T | G | . | PA:UNC5A    | intronic   | NM_.      | mis |
| ACaP06 | 6 | #### | rs7580301 | C | T | . | PA:MCUR1    | intronic   | NM_.      | mis |
| ACaP06 | 6 | #### | rs7598672 | G | A | . | PA:JARID2   | intronic   | NM_.      | mis |
| ACaP06 | 6 | #### | .         | G | A | . | PA:ACOT13   | UTR5       | NM_NM_.   | mis |
| ACaP06 | 6 | #### | .         | C | A | . | PA:HLA-G    | exonic     | NM_.      | mis |
| ACaP06 | 6 | #### | .         | G | C | . | PA:MSH5-SAI | ncRNA_NR_. | .         | mis |
| ACaP06 | 6 | #### | .         | C | T | . | PA:COL11A2  | intronic   | NM_.      | mis |
| ACaP06 | 6 | #### | .         | C | T | . | PA:DNPH1    | intronic   | NM_.      | mis |
| ACaP06 | 6 | #### | .         | A | G | . | PA:KHDRBS2  | intronic   | NM_.      | mis |
| ACaP06 | 6 | #### | .         | A | T | . | PA:LOC44111 | exonic     | NM_.      | mis |
| ACaP06 | 6 | #### | .         | G | T | . | PA:SYNJ2    | intronic   | NM_.      | mis |
| ACaP06 | 7 | #### | .         | G | A | . | PA:TMEM184  | intronic   | NM_.      | mis |
| ACaP06 | 7 | #### | rs2018986 | T | C | . | PA:.        | intergen   | NR_dist=. | mis |
| ACaP06 | 7 | #### | rs9803140 | C | G | . | PA:ADAM22   | intronic   | NM_.      | mis |
| ACaP06 | 7 | #### | rs1208357 | G | A | . | PA:.        | intergen   | NM_dist=. | mis |
| ACaP06 | 7 | #### | rs6248378 | G | A | . | PA:.        | intergen   | NM_dist=. | mis |
| ACaP06 | 7 | #### | .         | G | A | . | PA:GIMAP1   | exonic     | NM_.      | mis |
| ACaP06 | 7 | #### | .         | G | A | . | PA:.        | intergen   | NR_dist=. | mis |
| ACaP06 | 8 | #### | .         | G | A | . | PA:INTS9    | intronic   | NM_.      | mis |
| ACaP06 | 8 | #### | rs2022368 | A | G | . | PA:.        | intergen   | NM_dist=. | mis |
| ACaP06 | 8 | #### | .         | T | G | . | PA:SCRIB    | intronic   | NM_.      | mis |
| ACaP06 | 9 | #### | .         | G | C | . | PA:FRMD3    | exonic     | NM_.      | mis |
| ACaP06 | 9 | #### | .         | C | G | . | PA:ROR2     | intronic   | NM_.      | mis |

|        |    |      |           |   |   |   |              |            |            |             |
|--------|----|------|-----------|---|---|---|--------------|------------|------------|-------------|
| ACaP06 | 9  | #### | .         | T | C | . | PA:.         | intergen   | NM_dist=.  | .           |
| ACaP06 | 9  | #### | rs7729568 | G | A | . | PA:MAN1B1    | exonic     | NM_.       | syr MAN1B   |
| ACaP06 | 10 | #### | rs5354201 | C | T | . | PA:CXCL12    | intronic   | NM_.       | .           |
| ACaP06 | 10 | #### | .         | A | T | . | PA:.         | upstream   | NM_.       | .           |
| ACaP06 | 10 | #### | .         | G | T | . | PA:CCDC147   | exonic     | NM_.       | sto CCDC1   |
| ACaP06 | 10 | #### | .         | C | T | . | PA:KCNK18    | exonic     | NM_.       | mis KCNK1   |
| ACaP06 | 11 | #### | rs1474222 | G | A | . | PA:PIDD      | exonic     | NM_.       | syr PIDD:N  |
| ACaP06 | 11 | #### | .         | G | C | . | PA:ZNF195    | UTR5       | NM_NM_.    | .           |
| ACaP06 | 11 | #### | .         | G | A | . | PA:HPX       | exonic     | NM_.       | mis HPX:NM  |
| ACaP06 | 11 | #### | .         | G | A | . | PA:CAND1.11  | ncRNA_NR_. | .          | .           |
| ACaP06 | 11 | #### | rs7776543 | C | T | . | PA:KCNJ11    | UTR5       | NM_NM_.    | .           |
| ACaP06 | 11 | #### | rs7802181 | G | A | . | PA:TP53I11   | exonic     | NM_.       | syr TP53I1  |
| ACaP06 | 11 | #### | .         | C | G | . | PA:DTX4      | intronic   | NM_.       | .           |
| ACaP06 | 11 | #### | .         | C | T | . | PA:SLC25A4f  | UTR3       | NM_NM_.    | .           |
| ACaP06 | 11 | #### | rs1009016 | G | A | . | PA:TRIM29    | intronic   | NM_.       | .           |
| ACaP06 | 11 | #### | .         | G | A | . | PA:DDX25     | intronic   | NM_.       | .           |
| ACaP06 | 12 | #### | .         | G | C | . | PA:NACA      | exonic     | NM_.       | mis NACA:M  |
| ACaP06 | 12 | #### | rs8683709 | T | C | . | PA:HECTD4    | intronic   | NM_.       | .           |
| ACaP06 | 12 | #### | .         | G | T | . | PA:KDM2B     | intronic   | NM_.       | .           |
| ACaP06 | 12 | #### | .         | G | T | . | PA:HPD       | intronic   | NM_.       | .           |
| ACaP06 | 13 | #### | .         | G | A | . | PA:.         | intergen   | NR_dist=.  | .           |
| ACaP06 | 13 | #### | .         | G | A | . | PA:.         | intergen   | NR_dist=.  | .           |
| ACaP06 | 13 | #### | rs7603455 | G | A | . | PA:RNF17     | intronic   | NM_.       | .           |
| ACaP06 | 13 | #### | .         | G | A | . | PA:MTMR6     | exonic     | NM_.       | mis MTMR6   |
| ACaP06 | 13 | #### | .         | A | T | . | PA:MIR548F5  | ncRNA_NR_. | .          | .           |
| ACaP06 | 13 | #### | .         | A | T | . | PA:FREM2     | intronic   | NM_.       | .           |
| ACaP06 | 13 | #### | rs1847802 | G | A | . | PA:TBC1D4    | exonic     | NM_.       | sto TBC1D   |
| ACaP06 | 14 | #### | rs8674109 | G | T | . | PA:.         | intergen   | NM_dist=.  | .           |
| ACaP06 | 14 | #### | .         | C | T | . | PA:PRKD1     | exonic     | NM_.       | mis PRKD1   |
| ACaP06 | 14 | #### | .         | C | T | . | PA:CFL2      | UTR5       | NM_NM_.    | .           |
| ACaP06 | 14 | #### | .         | C | G | . | PA:PRPF39    | intronic   | NM_.       | .           |
| ACaP06 | 14 | #### | rs7590859 | C | T | . | PA:C14orf105 | exonic     | NM_.       | mis C14orf1 |
| ACaP06 | 14 | #### | .         | G | A | . | PA:PPP2R5E   | intronic   | NM_.       | .           |
| ACaP06 | 14 | #### | rs1126070 | A | G | . | PA:ADAM21P   | ncRNA_NR_. | .          | .           |
| ACaP06 | 14 | #### | .         | C | G | . | PA:TDRD9     | intronic   | NM_.       | .           |
| ACaP06 | 14 | #### | .         | C | T | . | PA:TDRD9     | intronic   | NM_.       | .           |
| ACaP06 | 14 | #### | .         | C | T | . | PA:TDRD9     | splicing   | NM_NM_.    | .           |
| ACaP06 | 15 | #### | .         | C | T | . | PA:.         | intergen   | NM_dist=.  | .           |
| ACaP06 | 15 | #### | .         | C | A | . | PA:THSD4     | exonic     | NM_.       | mis THSD4   |
| ACaP06 | 16 | #### | .         | G | A | . | PA:BAIAP3    | splicing   | NM_NM_.    | .           |
| ACaP06 | 16 | #### | .         | G | A | . | PA:UNKL      | intronic   | NM_.       | .           |
| ACaP06 | 16 | #### | rs7488576 | G | A | . | PA:C16orf71  | exonic     | NM_.       | mis C16orf7 |
| ACaP06 | 16 | #### | .         | G | C | . | PA:NAGPA     | intronic   | NM_.       | .           |
| ACaP06 | 16 | #### | .         | G | A | . | PA:ACSM5     | exonic     | NM_.       | mis ACSM5   |
| ACaP06 | 16 | #### | .         | G | A | . | PA:XPO6      | exonic     | NM_.       | mis XPO6:M  |
| ACaP06 | 16 | #### | .         | C | A | . | PA:ALDOA     | splicing   | NM_NM_.    | .           |
| ACaP06 | 16 | #### | rs7501178 | C | T | . | PA:.         | intergen   | NOI dist=. | .           |
| ACaP06 | 16 | #### | rs2128450 | T | A | . | PA:.         | intergen   | NOI dist=. | .           |
| ACaP06 | 16 | #### | rs4436803 | T | G | . | PA:.         | intergen   | NOI dist=. | .           |
| ACaP06 | 16 | #### | rs2887500 | T | G | . | PA:.         | intergen   | NOI dist=. | .           |
| ACaP06 | 16 | #### | .         | C | A | . | PA:HYDIN     | intronic   | NM_.       | .           |
| ACaP06 | 16 | #### | .         | T | C | . | PA:ZNF276    | exonic     | NM_.       | mis ZNF276  |
| ACaP06 | 17 | #### | .         | G | C | . | PA:KSR1      | intronic   | NM_.       | .           |
| ACaP06 | 17 | #### | .         | C | G | . | PA:EFCAB5    | exonic     | NM_.       | mis EFCAB   |



|           |    |      |           |   |   |   |             |            |            |     |         |
|-----------|----|------|-----------|---|---|---|-------------|------------|------------|-----|---------|
| ACaP06    | 17 | #### | .         | G | A | . | PA:GSDMB    | intronic   | NM_.       | .   | .       |
| ACaP06    | 17 | #### | rs1996882 | G | T | . | PA:CNP      | exonic     | NM_.       | mis | CNP:NM  |
| ACaP06    | 17 | #### | .         | C | G | . | PA:EZH1     | intronic   | NM_.       | .   | .       |
| ACaP06    | 17 | #### | rs1022498 | A | T | . | PA:EFTUD2   | intronic   | NM_.       | .   | .       |
| ACaP06    | 17 | #### | .         | C | T | . | PA:ERN1     | exonic     | NM_.       | mis | ERN1:M  |
| ACaP06    | 17 | #### | rs3720728 | C | T | . | PA:CACNG4   | exonic     | NM_.       | syr | CACNG   |
| ACaP06    | 17 | #### | .         | G | A | . | PA:FOXK2    | intronic   | NM_.       | .   | .       |
| ACaP06    | 18 | #### | .         | G | A | . | PA:NAPG     | exonic     | NM_.       | mis | NAPG:f  |
| ACaP06    | 18 | #### | .         | C | T | . | PA:CIDEA    | intronic   | NM_.       | .   | .       |
| ACaP06    | 18 | #### | .         | G | C | . | PA:.        | intergen   | NR_dist=.  | .   | .       |
| ACaP06    | 18 | #### | rs7558958 | C | T | . | PA:C18orf54 | exonic     | NM_.       | mis | C18orf5 |
| ACaP06    | 19 | #### | rs9952243 | G | A | . | PA:SIPA1L3  | exonic     | NM_.       | mis | SIPA1L  |
| ACaP06    | 19 | #### | .         | C | T | . | PA:SULT2B1  | exonic     | NM_.       | mis | SULT2B  |
| ACaP06    | 20 | #### | .         | G | T | . | PA:.        | upstream   | NM_.       | .   | .       |
| ACaP06    | 20 | #### | .         | T | G | . | PA:BPI      | intronic   | NM_.       | .   | .       |
| ACaP06    | 21 | #### | rs3697472 | C | A | . | PA:.        | intergen   | NR_dist=.  | .   | .       |
| ACaP06    | 21 | #### | rs7969899 | C | T | . | PA:.        | intergen   | NR_dist=.  | .   | .       |
| ACaP06    | 21 | #### | .         | C | T | . | PA:.        | intergen   | NM_dist=.  | .   | .       |
| ACaP06    | 21 | #### | .         | C | G | . | PA:TRAPPC1  | intronic   | NM_.       | .   | .       |
| ACaP06    | 22 | #### | rs2212142 | T | G | . | PA:POTEH    | intronic   | NM_.       | .   | .       |
| ACaP06    | 22 | #### | .         | G | T | . | PA:LINC0089 | ncRNA_NR_. | .          | .   | .       |
| ACaP06    | 22 | #### | rs2015076 | G | C | . | PA:.        | intergen   | NM_dist=.  | .   | .       |
| ACaP06    | 22 | #### | rs7611606 | G | A | . | PA:ELFN2    | exonic     | NM_.       | mis | ELFN2:  |
| ACaP06    | 22 | #### | .         | T | A | . | PA:PICK1    | intronic   | NM_.       | .   | .       |
| ACaP06 X  |    | #### | rs3397828 | A | G | . | PA:BCYRN1   | ncRNA_NR_. | .          | .   | .       |
| ACaP06 X  |    | #### | .         | C | T | . | PA:CPXCR1   | exonic     | NM_.       | syr | CPXCR   |
| ACaP06 MT |    | 215  | rs8792192 | A | G | . | PA:.        | intergen   | NOI dist=. | .   | .       |
| ACaP07    | 1  | #### | .         | G | A | . | PA:NECAP2   | exonic     | NM_.       | mis | NECAP   |
| ACaP07    | 1  | #### | rs1996890 | T | C | . | PA:NBPF1    | intronic   | NM_.       | .   | .       |
| ACaP07    | 1  | #### | .         | C | A | . | PA:DLGAP3   | exonic     | NM_.       | mis | DLGAP   |
| ACaP07    | 1  | #### | .         | A | G | . | PA:GNAI3    | exonic     | NM_.       | mis | GNAI3:l |
| ACaP07    | 1  | #### | .         | T | C | . | PA:.        | intergen   | NR_dist=.  | .   | .       |
| ACaP07    | 1  | #### | rs1694653 | C | G | . | PA:.        | intergen   | NR_dist=.  | .   | .       |
| ACaP07    | 1  | #### | rs9441133 | T | G | . | PA:NBPF9,NE | exonic     | NM_.       | unl | UNKNC   |
| ACaP07    | 1  | #### | rs7819708 | C | G | . | PA:NBPF9,NE | exonic     | NM_.       | unl | UNKNC   |
| ACaP07    | 1  | #### | rs2022445 | T | A | . | PA:NBPF8    | intronic   | NM_.       | .   | .       |
| ACaP07    | 1  | #### | .         | C | T | . | PA:.        | intergen   | NM_dist=.  | .   | .       |
| ACaP07    | 1  | #### | .         | C | T | . | PA:ANXA9    | intronic   | NM_.       | .   | .       |
| ACaP07    | 1  | #### | .         | C | G | . | PA:.        | intergen   | NM_dist=.  | .   | .       |
| ACaP07    | 1  | #### | rs1494980 | T | C | . | PA:RNASEL   | exonic     | NM_.       | mis | RNASE   |
| ACaP07    | 1  | #### | .         | C | A | . | PA:HMCN1    | exonic     | NM_.       | mis | HMCN1   |
| ACaP07    | 1  | #### | rs7630457 | C | T | . | PA:CENPF    | exonic     | NM_.       | mis | CENPF   |
| ACaP07    | 1  | #### | rs3725088 | G | T | . | PA:KIAA1804 | intronic   | NM_.       | .   | .       |
| ACaP07    | 2  | #### | .         | T | C | . | PA:COX7A2L  | exonic     | NM_.       | mis | COX7A   |
| ACaP07    | 2  | #### | rs6214568 | A | G | . | PA:.        | intergen   | NR_dist=.  | .   | .       |
| ACaP07    | 2  | #### | .         | C | G | . | PA:ACOXL    | intronic   | NM_.       | .   | .       |
| ACaP07    | 2  | #### | rs1476846 | C | T | . | PA:ANAPC1   | exonic     | NM_.       | mis | ANAPC   |
| ACaP07    | 2  | #### | .         | C | G | . | PA:SP140L   | intronic   | NM_.       | .   | .       |
| ACaP07    | 3  | #### | .         | G | A | . | PA:ACKR2    | UTR3       | NM_NM_.    | .   | .       |
| ACaP07    | 3  | #### | .         | C | A | . | PA:CELSR3   | exonic     | NM_.       | mis | CELSR   |
| ACaP07    | 3  | #### | .         | G | T | . | PA:DPPA2    | intronic   | NM_.       | .   | .       |
| ACaP07    | 3  | #### | rs1428044 | G | A | . | PA:SPICE1   | exonic     | NM_.       | syr | SPICE1  |
| ACaP07    | 3  | #### | .         | T | C | . | PA:MME      | intronic   | NM_.       | .   | .       |
| ACaP07    | 4  | #### | rs4970287 | C | T | . | PA:.        | intergen   | NOI dist=. | .   | .       |

|        |    |      |           |   |   |   |              |            |           |             |
|--------|----|------|-----------|---|---|---|--------------|------------|-----------|-------------|
| ACaP07 | 4  | #### | .         | T | C | . | PA:PPP3CA    | splicing   | NM_NM_.   | .           |
| ACaP07 | 4  | #### | .         | G | A | . | PA:TET2      | exonic     | NM_.      | mis TET2:N  |
| ACaP07 | 5  | #### | .         | C | T | . | PA:NIPBL     | exonic     | NM_.      | sto NIPBL:f |
| ACaP07 | 5  | #### | .         | C | A | . | PA:SLC4A9    | intronic   | NM_.      | .           |
| ACaP07 | 7  | #### | rs9642790 | C | T | . | PA:EPDR1     | intronic   | NM_.      | .           |
| ACaP07 | 7  | #### | rs6246184 | G | A | . | PA:.         | intergen   | NR_dist=. | .           |
| ACaP07 | 7  | #### | .         | C | A | . | PA:.         | intergen   | NR_dist=. | .           |
| ACaP07 | 7  | #### | .         | C | T | . | PA:LRCH4,Zf  | exonic     | NM_.      | mis LRCH4:  |
| ACaP07 | 7  | #### | .         | C | A | . | PA:PTPRZ1    | exonic     | NM_.      | mis PTPRZ   |
| ACaP07 | 7  | #### | rs8915428 | C | T | . | PA:SSPO      | intronic   | NM_.      | .           |
| ACaP07 | 7  | #### | .         | A | T | . | PA:PAXIP1-A  | ncRNA_NR_. | .         | .           |
| ACaP07 | 8  | #### | .         | G | A | . | PA:INTS9     | intronic   | NM_.      | .           |
| ACaP07 | 8  | #### | .         | C | G | . | PA:ZNF703    | exonic     | NM_.      | mis ZNF703  |
| ACaP07 | 8  | #### | .         | G | A | . | PA:C8orf44-S | intronic   | NM_.      | .           |
| ACaP07 | 9  | #### | .         | G | A | . | PA:JAK2      | intronic   | NM_.      | .           |
| ACaP07 | 9  | #### | .         | G | A | . | PA:NDOR1     | intronic   | NM_.      | .           |
| ACaP07 | 10 | #### | .         | C | G | . | PA:NDST2     | intronic   | NM_.      | .           |
| ACaP07 | 10 | #### | .         | G | C | . | PA:GRID1     | exonic     | NM_.      | mis GRID1:  |
| ACaP07 | 10 | #### | .         | G | T | . | PA:NOLC1     | exonic     | NM_.      | syr NOLC1   |
| ACaP07 | 10 | #### | .         | G | C | . | PA:PDCD11    | intronic   | NM_.      | .           |
| ACaP07 | 10 | #### | .         | G | A | . | PA:KNDC1     | splicing   | NM_NM_.   | .           |
| ACaP07 | 11 | #### | .         | C | A | . | PA:TRIM5     | exonic     | NM_.      | mis TRIM5:l |
| ACaP07 | 11 | #### | .         | T | C | . | PA:NLRP10    | exonic     | NM_.      | syr NLRP10  |
| ACaP07 | 11 | #### | .         | C | T | . | PA:DCDC5     | splicing   | NM_NM_.   | .           |
| ACaP07 | 11 | #### | .         | C | T | . | PA:TRAF6     | exonic     | NM_.      | mis TRAF6:  |
| ACaP07 | 11 | #### | .         | T | C | . | PA:CWC15     | intronic   | NM_.      | .           |
| ACaP07 | 11 | #### | rs7580622 | C | T | . | PA:DSCAML1   | exonic     | NM_.      | syr DSCAM   |
| ACaP07 | 12 | #### | .         | A | G | . | PA:CD163     | exonic     | NM_.      | mis CD163:  |
| ACaP07 | 12 | #### | .         | G | A | . | PA:.         | downstr    | NM_.      | .           |
| ACaP07 | 12 | #### | .         | C | G | . | PA:GPD1      | exonic     | NM_.      | mis GPD1:M  |
| ACaP07 | 12 | #### | .         | C | T | . | PA:GPR84     | exonic     | NM_.      | syr GPR84:  |
| ACaP07 | 12 | #### | .         | G | C | . | PA:SLC26A10  | intronic   | NM_.      | .           |
| ACaP07 | 12 | #### | .         | C | A | . | PA:HCAR3     | exonic     | NM_.      | mis HCAR3   |
| ACaP07 | 13 | #### | .         | C | A | . | PA:GPC5      | exonic     | NM_.      | mis GPC5:M  |
| ACaP07 | 14 | #### | rs7149806 | A | G | . | PA:.         | intergen   | NM_dist=. | .           |
| ACaP07 | 14 | #### | .         | G | T | . | PA:.         | intergen   | NR_dist=. | .           |
| ACaP07 | 15 | #### | .         | T | G | . | PA:NDN       | exonic     | NM_.      | mis NDN:NI  |
| ACaP07 | 15 | #### | rs1995696 | A | G | . | PA:.         | intergen   | NM_dist=. | .           |
| ACaP07 | 15 | #### | .         | G | T | . | PA:FMN1      | exonic     | NM_.      | mis FMN1:M  |
| ACaP07 | 15 | #### | .         | C | G | . | PA:GCOM1,M   | intronic   | NM_.      | .           |
| ACaP07 | 15 | #### | .         | C | A | . | PA:PARP6     | intronic   | NM_.      | .           |
| ACaP07 | 15 | #### | .         | G | C | . | PA:ANPEP     | exonic     | NM_.      | mis ANPEP   |
| ACaP07 | 16 | #### | .         | G | A | . | PA:RBFOX1    | UTR5       | NM_NM_.   | .           |
| ACaP07 | 16 | #### | .         | G | T | . | PA:.         | intergen   | NM_dist=. | .           |
| ACaP07 | 17 | #### | .         | G | C | . | PA:MYH13     | intronic   | NM_.      | .           |
| ACaP07 | 17 | #### | .         | T | C | . | PA:TBC1D3P   | ncRNA_NR_. | .         | .           |
| ACaP07 | 18 | #### | rs8790150 | G | A | . | PA:.         | intergen   | NM_dist=. | .           |
| ACaP07 | 19 | #### | rs8673654 | T | C | . | PA:ZFR2      | intronic   | NM_.      | .           |
| ACaP07 | 19 | #### | rs7668108 | G | A | . | PA:MAN2B1    | exonic     | NM_.      | syr MAN2B   |
| ACaP07 | 19 | #### | rs7683037 | G | A | . | PA:CRLF1     | exonic     | NM_.      | mis CRLF1:  |
| ACaP07 | 19 | #### | .         | T | A | . | PA:ZNF676    | UTR3       | NM_NM_.   | .           |
| ACaP07 | 19 | #### | .         | T | G | . | PA:ZNF829    | intronic   | NM_.      | .           |
| ACaP07 | 19 | #### | .         | C | T | . | PA:MAP4K1    | exonic     | NM_.      | syr MAP4K   |
| ACaP07 | 19 | #### | .         | T | G | . | PA:SYMPK     | intronic   | NM_.      | .           |

|          |    |      |           |   |   |   |             |                    |   |             |
|----------|----|------|-----------|---|---|---|-------------|--------------------|---|-------------|
| ACaP07   | 19 | #### | .         | G | C | . | PA:NAPA-AS  | ncRNA_NR           | . | .           |
| ACaP07   | 19 | #### | .         | C | G | . | PA:TULP2    | intronic NM        | . | .           |
| ACaP07   | 19 | #### | .         | G | A | . | PA:TULP2    | intronic NM        | . | .           |
| ACaP07   | 19 | #### | .         | A | G | . | PA:.        | upstream NR        | . | .           |
| ACaP07   | 19 | #### | .         | G | A | . | PA:NLRP9    | exonic NM          | . | syr NLRP9:  |
| ACaP07   | 20 | #### | .         | G | C | . | PA:IFT52    | intronic NM        | . | .           |
| ACaP07   | 20 | #### | .         | A | G | . | PA:SALL4    | exonic NM          | . | mis SALL4:l |
| ACaP07   | 21 | #### | rs1118412 | G | A | . | PA:.        | intergen NM_dist=  | . | .           |
| ACaP07   | 21 | #### | .         | C | A | . | PA:ADAMTS5  | exonic NM          | . | mis ADAMT   |
| ACaP07   | 21 | #### | .         | C | T | . | PA:URB1     | exonic NM          | . | mis URB1:N  |
| ACaP07   | 22 | #### | rs2006656 | T | C | . | PA:.        | intergen NM_dist=  | . | .           |
| ACaP07   | 22 | #### | rs9392199 | G | A | . | PA:PARVB    | intronic NM        | . | .           |
| ACaP07X  |    | #### | rs734038  | T | G | . | PA:KRBOX4   | intronic NM        | . | .           |
| ACaP07X  |    | #### | rs1826904 | G | C | . | PA:.        | intergen NM_dist=  | . | .           |
| ACaP07X  |    | #### | .         | T | A | . | PA:OCRL     | exonic NM          | . | mis OCRL:N  |
| ACaP07X  |    | #### | .         | C | T | . | PA:GPR112   | exonic NM          | . | mis GPR11:  |
| ACaP07X  |    | #### | .         | C | A | . | PA:SLITRK2  | exonic NM          | . | mis SLITRK  |
| ACaP07X  |    | #### | .         | G | A | . | PA:F8       | exonic NM          | . | mis F8:NM_  |
| ACaP07MT |    | #### | .         | G | A | . | PA:.        | intergen NOI dist= | . | .           |
| ACaP07MT |    | #### | .         | T | C | . | PA:.        | intergen NOI dist= | . | .           |
| ACaP08   | 1  | #### | rs1810443 | G | A | . | PA:.        | intergen NR_dist=  | . | .           |
| ACaP08   | 1  | #### | rs3698413 | G | A | . | PA:.        | intergen NR_dist=  | . | .           |
| ACaP08   | 1  | #### | rs3774960 | G | A | . | PA:.        | intergen NR_dist=  | . | .           |
| ACaP08   | 1  | #### | rs2596327 | T | A | . | PA:NBPF9,SE | intronic NM        | . | .           |
| ACaP08   | 1  | #### | rs2020368 | T | A | . | PA:NBPF8    | intronic NM        | . | .           |
| ACaP08   | 1  | #### | .         | C | A | . | PA:NBPF25P  | ncRNA_NR           | . | .           |
| ACaP08   | 2  | #### | .         | G | C | . | PA:DNAH6    | intronic NM        | . | .           |
| ACaP08   | 2  | #### | rs2647769 | C | T | . | PA:.        | intergen NOI dist= | . | .           |
| ACaP08   | 2  | #### | .         | C | T | . | PA:.        | downstr NM         | . | .           |
| ACaP08   | 2  | #### | .         | C | A | . | PA:FBLN7    | intronic NM        | . | .           |
| ACaP08   | 2  | #### | .         | C | G | . | PA:FBLN7    | intronic NM        | . | .           |
| ACaP08   | 2  | #### | rs6216494 | T | A | . | PA:POTEJ    | intronic NM        | . | .           |
| ACaP08   | 3  | #### | .         | G | T | . | PA:TFDP2    | intronic NM        | . | .           |
| ACaP08   | 4  | #### | .         | C | A | . | PA:CYTL1    | intronic NM        | . | .           |
| ACaP08   | 4  | #### | rs1429725 | C | T | . | PA:.        | intergen NM_dist=  | . | .           |
| ACaP08   | 5  | #### | rs2871612 | T | C | . | PA:GUSBP1   | ncRNA_NR           | . | .           |
| ACaP08   | 7  | #### | rs6246206 | T | C | . | PA:.        | intergen NR_dist=  | . | .           |
| ACaP08   | 7  | #### | rs3680944 | T | C | . | PA:CCT6P1,L | ncRNA_NR           | . | .           |
| ACaP08   | 8  | #### | rs1499905 | G | C | . | PA:.        | intergen NM_dist=  | . | .           |
| ACaP08   | 10 | #### | .         | T | A | . | PA:CDH23    | intronic NM        | . | .           |
| ACaP08   | 10 | #### | rs7710236 | G | A | . | PA:C10orf11 | intronic NM        | . | .           |
| ACaP08   | 10 | #### | rs1788433 | A | G | . | PA:SFTPA2   | intronic NM        | . | .           |
| ACaP08   | 10 | #### | .         | T | G | . | PA:DMBT1    | intronic NM        | . | .           |
| ACaP08   | 11 | #### | .         | T | A | . | PA:PKNOX2   | intronic NM        | . | .           |
| ACaP08   | 12 | #### | rs1063873 | T | G | . | PA:.        | intergen NR_dist=  | . | .           |
| ACaP08   | 14 | #### | rs4247513 | T | C | . | PA:.        | intergen NR_dist=  | . | .           |
| ACaP08   | 14 | #### | rs7445485 | C | T | . | PA:.        | intergen NR_dist=  | . | .           |
| ACaP08   | 14 | #### | rs8678279 | G | A | . | PA:.        | intergen NM_dist=  | . | .           |
| ACaP08   | 14 | #### | .         | A | T | . | PA:.        | intergen NM_dist=  | . | .           |
| ACaP08   | 17 | #### | rs3930170 | G | T | . | PA:.        | upstream NM        | . | .           |
| ACaP08   | 17 | #### | rs3894278 | A | T | . | PA:MYCBPAF  | intronic NM        | . | .           |
| ACaP08   | 21 | #### | rs1963041 | G | A | . | PA:.        | intergen NR_dist=  | . | .           |
| ACaP08   | 22 | #### | rs3716554 | G | T | . | PA:.        | intergen NM_dist=  | . | .           |
| ACaP08   | 22 | #### | .         | C | A | . | PA:.        | intergen NM_dist=  | . | .           |

|         |      |           |           |   |   |           |             |            |           |            |
|---------|------|-----------|-----------|---|---|-----------|-------------|------------|-----------|------------|
| ACaP0εX | #### | rs7819787 | C         | A | . | PA:CT45A1 | UTR3        | NM_NM_.    | .         |            |
| ACaP0ε  | 1    | ####      | .         | T | G | .         | PA:ATAD3A   | intronic   | NM_.      | .          |
| ACaP0ε  | 1    | ####      | rs453347  | G | C | .         | PA:NBPF1    | intronic   | NM_.      | .          |
| ACaP0ε  | 1    | ####      | .         | G | T | .         | PA:BTBD19   | intronic   | NM_.      | .          |
| ACaP0ε  | 1    | ####      | rs1812127 | C | G | .         | PA:.        | intergen   | NR_dist=. | .          |
| ACaP0ε  | 1    | ####      | .         | C | G | .         | PA:NOTCH2N  | intronic   | NM_.      | .          |
| ACaP0ε  | 1    | ####      | rs8799607 | G | T | .         | PA:NBPF25P  | ncRNA_NR_. | .         | .          |
| ACaP0ε  | 1    | ####      | rs1451754 | C | A | .         | PA:NBPF8    | intronic   | NM_.      | .          |
| ACaP0ε  | 1    | ####      | rs2003945 | G | T | .         | PA:NBPF8    | intronic   | NM_.      | .          |
| ACaP0ε  | 1    | ####      | rs7970322 | T | G | .         | PA:NBPF8    | intronic   | NM_.      | .          |
| ACaP0ε  | 1    | ####      | .         | G | T | .         | PA:NUCKS1   | intronic   | NM_.      | .          |
| ACaP0ε  | 2    | ####      | rs1996199 | C | T | .         | PA:NEU4     | intronic   | NM_.      | .          |
| ACaP0ε  | 3    | ####      | .         | G | T | .         | PA:.        | intergen   | NM_dist=. | .          |
| ACaP0ε  | 3    | ####      | rs1873413 | C | T | .         | PA:PRKCI    | intronic   | NM_.      | .          |
| ACaP0ε  | 3    | ####      | rs3723871 | A | G | .         | PA:.        | intergen   | NM_dist=. | .          |
| ACaP0ε  | 3    | ####      | .         | T | C | .         | PA:MUC20    | intronic   | NM_.      | .          |
| ACaP0ε  | 3    | ####      | rs2006820 | G | A | .         | PA:SDHAP1   | ncRNA_NR_. | .         | .          |
| ACaP0ε  | 4    | ####      | .         | T | A | .         | PA:.        | upstream   | NM_.      | .          |
| ACaP0ε  | 5    | ####      | .         | C | A | .         | PA:CAMLG    | UTR3       | NM_NM_.   | .          |
| ACaP0ε  | 6    | ####      | .         | C | T | .         | PA:.        | intergen   | NM_dist=. | .          |
| ACaP0ε  | 6    | ####      | rs7746421 | C | G | .         | PA:LPA      | intronic   | NM_.      | .          |
| ACaP0ε  | 6    | ####      | rs3759780 | G | C | .         | PA:.        | intergen   | NM_dist=. | .          |
| ACaP0ε  | 7    | ####      | .         | C | G | .         | PA:.        | intergen   | NR_dist=. | .          |
| ACaP0ε  | 7    | ####      | .         | T | A | .         | PA:.        | intergen   | NR_dist=. | .          |
| ACaP0ε  | 7    | ####      | .         | T | G | .         | PA:AUTS2    | exonic     | NM_.      | mis AUTS2: |
| ACaP0ε  | 9    | ####      | rs2803685 | G | T | .         | PA:FAM27C   | ncRNA_NR_. | .         | .          |
| ACaP0ε  | 10   | ####      | rs1996770 | C | T | .         | PA:.        | intergen   | NM_dist=. | .          |
| ACaP0ε  | 10   | ####      | rs1456597 | C | A | .         | PA:.        | intergen   | NM_dist=. | .          |
| ACaP0ε  | 11   | ####      | .         | A | C | .         | PA:HPX      | intronic   | NM_.      | .          |
| ACaP0ε  | 11   | ####      | .         | T | C | .         | PA:SLC43A1  | intronic   | NM_.      | .          |
| ACaP0ε  | 12   | ####      | rs3718339 | T | G | .         | PA:LOC1002ε | ncRNA_NR_. | .         | .          |
| ACaP0ε  | 12   | ####      | rs3767721 | C | T | .         | PA:LOC1002ε | ncRNA_NR_. | .         | .          |
| ACaP0ε  | 12   | ####      | rs5604999 | A | T | .         | PA:XPOT     | intronic   | NM_.      | .          |
| ACaP0ε  | 14   | ####      | rs7755744 | G | A | .         | PA:POTEG    | intronic   | NM_.      | .          |
| ACaP0ε  | 14   | ####      | rs1018908 | C | T | .         | PA:.        | intergen   | NM_dist=. | .          |
| ACaP0ε  | 15   | ####      | .         | G | A | .         | PA:GOLGA8E  | ncRNA_NR_. | .         | .          |
| ACaP0ε  | 15   | ####      | rs7568595 | T | C | .         | PA:AQR      | exonic     | NM_.      | syr AQR:NI |
| ACaP0ε  | 16   | ####      | rs3739171 | C | T | .         | PA:SMG1P1   | ncRNA_NR_. | .         | .          |
| ACaP0ε  | 16   | ####      | rs7137409 | G | A | .         | PA:CES1P1   | ncRNA_NR_. | .         | .          |
| ACaP0ε  | 17   | ####      | rs7124761 | G | A | .         | PA:.        | intergen   | NM_dist=. | .          |
| ACaP0ε  | 17   | ####      | rs6149181 | G | T | .         | PA:FLJ36000 | ncRNA_NR_. | .         | .          |
| ACaP0ε  | 17   | ####      | rs2870408 | T | C | .         | PA:USP32    | intronic   | NM_.      | .          |
| ACaP0ε  | 17   | ####      | rs2848380 | C | T | .         | PA:USP32    | intronic   | NM_.      | .          |
| ACaP0ε  | 17   | ####      | .         | G | C | .         | PA:STRA13   | intronic   | NM_.      | .          |
| ACaP0ε  | 18   | ####      | .         | C | A | .         | PA:.        | upstream   | NM_.      | .          |
| ACaP0ε  | 19   | ####      | .         | A | G | .         | PA:MUC16    | intronic   | NM_.      | .          |
| ACaP0ε  | 21   | ####      | .         | G | T | .         | PA:.        | intergen   | NR_dist=. | .          |
| ACaP0ε  | 22   | ####      | .         | A | T | .         | PA:FAM230B  | ncRNA_NR_. | .         | .          |
| ACaP0ε  | 22   | ####      | rs3609392 | C | T | .         | PA:CYP2D7P  | ncRNA_NR_. | .         | .          |
| ACaP0εX | #### | .         | C         | A | . | PA:FAAH2  | intronic    | NM_.       | .         | .          |
| ACaP1C  | 1    | ####      | rs7558529 | C | T | .         | PA:MXRA8    | exonic     | NM_.      | mis MXRA8  |
| ACaP1C  | 1    | ####      | .         | C | T | .         | PA:ATAD3B   | intronic   | NM_.      | .          |
| ACaP1C  | 1    | ####      | .         | G | C | .         | PA:CLSPN    | intronic   | NM_.      | .          |
| ACaP1C  | 1    | ####      | .         | G | C | .         | PA:AGO4     | intronic   | NM_.      | .          |

|        |   |      |           |   |   |   |             |           |          |     |         |
|--------|---|------|-----------|---|---|---|-------------|-----------|----------|-----|---------|
| ACaP1C | 1 | #### | .         | C | T | . | PA:EPHA10   | intronic  | NM_      | .   | .       |
| ACaP1C | 1 | #### | .         | G | A | . | PA:.        | intergen  | NM_dist= | .   | .       |
| ACaP1C | 1 | #### | .         | G | T | . | PA:.        | intergen  | NM_dist= | .   | .       |
| ACaP1C | 1 | #### | .         | C | T | . | PA: 15-Sep  | exonic    | NM_      | unl | UNKNC   |
| ACaP1C | 1 | #### | .         | C | T | . | PA:LRRC8B   | exonic    | NM_      | sto | LRRC8B  |
| ACaP1C | 1 | #### | rs1430207 | T | C | . | PA:SYCP1    | intronic  | NM_      | .   | .       |
| ACaP1C | 1 | #### | .         | G | A | . | PA:NOTCH2   | intronic  | NM_      | .   | .       |
| ACaP1C | 1 | #### | rs1996428 | C | T | . | PA:.        | intergen  | NR_dist= | .   | .       |
| ACaP1C | 1 | #### | .         | G | C | . | PA:NBPF9,NC | intronic  | NM_      | .   | .       |
| ACaP1C | 1 | #### | rs3755029 | A | T | . | PA:NBPF25P  | ncRNA_NR_ | .        | .   |         |
| ACaP1C | 1 | #### | rs2849511 | G | A | . | PA:LINC0113 | ncRNA_NR_ | .        | .   |         |
| ACaP1C | 1 | #### | rs7824596 | A | C | . | PA:NBPF8    | intronic  | NM_      | .   | .       |
| ACaP1C | 1 | #### | rs3765099 | T | G | . | PA:NBPF8    | intronic  | NM_      | .   | .       |
| ACaP1C | 1 | #### | rs9099303 | C | T | . | PA:TCHH     | exonic    | NM_      | mis | TCHH:1  |
| ACaP1C | 1 | #### | .         | G | C | . | PA:ATP8B2   | intronic  | NM_      | .   | .       |
| ACaP1C | 1 | #### | .         | G | A | . | PA:RASAL2   | intronic  | NM_      | .   | .       |
| ACaP1C | 1 | #### | .         | A | G | . | PA:PLEKHA6  | intronic  | NM_      | .   | .       |
| ACaP1C | 1 | #### | .         | C | T | . | PA:C4BPB    | intronic  | NM_      | .   | .       |
| ACaP1C | 2 | #### | .         | G | T | . | PA:TTN      | splicing  | NM_NM_   | .   | .       |
| ACaP1C | 2 | #### | .         | G | C | . | PA:TNS1     | intronic  | NM_      | .   | .       |
| ACaP1C | 3 | #### | rs7793139 | G | A | . | PA:ITPR1    | exonic    | NM_      | mis | ITPR1:1 |
| ACaP1C | 3 | #### | .         | C | T | . | PA:RAD18    | intronic  | NM_      | .   | .       |
| ACaP1C | 3 | #### | .         | G | C | . | PA:FBLN2    | intronic  | NM_      | .   | .       |
| ACaP1C | 3 | #### | .         | C | T | . | PA:STAB1    | exonic    | NM_      | mis | STAB1:  |
| ACaP1C | 4 | #### | rs7785731 | C | T | . | PA:NELFA    | exonic    | NM_      | syr | NELFA:  |
| ACaP1C | 4 | #### | rs7749410 | G | A | . | PA:SPP1     | intronic  | NM_      | .   | .       |
| ACaP1C | 5 | #### | rs2382048 | A | G | . | PA:.        | intergen  | NM_dist= | .   | .       |
| ACaP1C | 5 | #### | rs7817278 | C | G | . | PA:DHFR     | exonic    | NM_      | mis | DHFR:1  |
| ACaP1C | 5 | #### | .         | A | G | . | PA:COMMD1   | UTR5      | NM_NM_   | .   | .       |
| ACaP1C | 5 | #### | rs1140023 | G | A | . | PA:ZNF474   | exonic    | NM_      | mis | ZNF474  |
| ACaP1C | 5 | #### | .         | C | T | . | PA:SLC36A3  | intronic  | NM_      | .   | .       |
| ACaP1C | 5 | #### | .         | G | A | . | PA:GABRB2   | exonic    | NM_      | sto | GABRB   |
| ACaP1C | 6 | #### | .         | G | C | . | PA:WRNIP1   | splicing  | NM_NM_   | .   | .       |
| ACaP1C | 6 | #### | .         | C | T | . | PA:SLC44A4  | exonic    | NM_      | mis | SLC44A4 |
| ACaP1C | 6 | #### | .         | T | C | . | PA:TNFRSF2  | intronic  | NM_      | .   | .       |
| ACaP1C | 6 | #### | rs9907394 | C | T | . | PA:LAMA2    | intronic  | NM_      | .   | .       |
| ACaP1C | 6 | #### | .         | G | A | . | PA:ARID1B   | exonic    | NM_      | mis | ARID1B  |
| ACaP1C | 6 | #### | .         | G | A | . | PA:MLLT4    | exonic    | NM_      | mis | MLLT4:  |
| ACaP1C | 6 | #### | .         | G | A | . | PA:TBP      | intronic  | NM_      | .   | .       |
| ACaP1C | 7 | #### | .         | C | G | . | PA:TTYH3    | exonic    | NM_      | mis | TTYH3:  |
| ACaP1C | 7 | #### | .         | C | G | . | PA:PMS2     | intronic  | NM_      | .   | .       |
| ACaP1C | 7 | #### | rs7468373 | T | C | . | PA:ISPD     | exonic    | NM_      | syr | ISPD:N  |
| ACaP1C | 7 | #### | .         | A | T | . | PA:HECW1    | exonic    | NM_      | mis | HECW1:  |
| ACaP1C | 7 | #### | .         | G | A | . | PA:.        | upstream  | NM_      | .   | .       |
| ACaP1C | 7 | #### | rs5705914 | T | G | . | PA:.        | intergen  | NM_dist= | .   | .       |
| ACaP1C | 7 | #### | rs1481871 | C | T | . | PA:GIMAP6   | exonic    | NM_      | mis | GIMAP6  |
| ACaP1C | 8 | #### | rs7588073 | G | A | . | PA:DLGAP2   | intronic  | NM_      | .   | .       |
| ACaP1C | 8 | #### | rs7479925 | G | A | . | PA:BLK      | intronic  | NM_      | .   | .       |
| ACaP1C | 8 | #### | .         | T | G | . | PA:.        | intergen  | NM_dist= | .   | .       |
| ACaP1C | 8 | #### | rs5327262 | C | T | . | PA:.        | intergen  | NM_dist= | .   | .       |
| ACaP1C | 8 | #### | rs5696070 | G | A | . | PA:CYC1     | intronic  | NM_      | .   | .       |
| ACaP1C | 9 | #### | rs3682437 | G | A | . | PA:GNA14    | exonic    | NM_      | mis | GNA14:  |
| ACaP1C | 9 | #### | rs3746457 | G | A | . | PA:OR13C3   | exonic    | NM_      | syr | OR13C   |
| ACaP1C | 9 | #### | rs7528554 | G | A | . | PA:ZER1     | intronic  | NM_      | .   | .       |

|         |    |      |           |   |   |   |             |            |           |     |         |
|---------|----|------|-----------|---|---|---|-------------|------------|-----------|-----|---------|
| ACaP1C  | 9  | #### | rs5640471 | G | A | . | PA:PHPT1    | exonic     | NM_.      | mis | PHPT1:  |
| ACaP1C  | 9  | #### | rs5505690 | C | T | . | PA:CACNA1E  | intronic   | NM_.      | .   | .       |
| ACaP1C  | 10 | #### | .         | G | A | . | PA:RBM20    | exonic     | NM_.      | mis | RBM20   |
| ACaP1C  | 11 | #### | rs7615769 | A | T | . | PA:METTL15  | intronic   | NM_.      | .   | .       |
| ACaP1C  | 11 | #### | .         | C | T | . | PA:DCDC5    | exonic     | NM_.      | syr | DCDC5   |
| ACaP1C  | 11 | #### | rs7817387 | C | G | . | PA:DGKZ     | exonic     | NM_.      | syr | DGKZ:†  |
| ACaP1C  | 11 | #### | .         | T | C | . | PA:.        | upstream   | NM_.      | .   | .       |
| ACaP1C  | 11 | #### | rs7525419 | G | A | . | PA:C11orf84 | exonic     | NM_.      | mis | C11orf8 |
| ACaP1C  | 11 | #### | .         | G | C | . | PA:CAPN1    | intronic   | NM_.      | .   | .       |
| ACaP1C  | 11 | #### | .         | G | A | . | PA:GLB1L2   | intronic   | NM_.      | .   | .       |
| ACaP1C  | 12 | #### | .         | C | G | . | PA:RASAL1   | exonic     | NM_.      | mis | RASAL:  |
| ACaP1C  | 12 | #### | rs1409770 | G | A | . | PA:WDR66    | exonic     | NM_.      | mis | WDR66   |
| ACaP1C  | 13 | #### | .         | T | C | . | PA:ALG5     | intronic   | NM_.      | .   | .       |
| ACaP1C  | 13 | #### | .         | G | T | . | PA:.        | upstream   | NM_.      | .   | .       |
| ACaP1C  | 14 | #### | .         | C | G | . | PA:.        | intergen   | NR_dist=. | .   | .       |
| ACaP1C  | 14 | #### | .         | C | A | . | PA:NID2     | intronic   | NM_.      | .   | .       |
| ACaP1C  | 14 | #### | .         | A | C | . | PA:ZFYVE26  | intronic   | NM_.      | .   | .       |
| ACaP1C  | 14 | #### | .         | C | T | . | PA:ZNF410   | intronic   | NM_.      | .   | .       |
| ACaP1C  | 14 | #### | .         | C | T | . | PA:ZNF410   | intronic   | NM_.      | .   | .       |
| ACaP1C  | 16 | #### | rs7663922 | C | T | . | PA:ITFG3    | exonic     | NM_.      | mis | ITFG3:† |
| ACaP1C  | 16 | #### | rs5750779 | C | T | . | PA:CHTF18   | intronic   | NM_.      | .   | .       |
| ACaP1C  | 16 | #### | .         | C | T | . | PA:SEC14L5  | intronic   | NM_.      | .   | .       |
| ACaP1C  | 16 | #### | .         | T | C | . | PA:COG7     | intronic   | NM_.      | .   | .       |
| ACaP1C  | 16 | #### | rs7569695 | A | G | . | PA:RNU6-76F | ncRNA_NR_. | .         | .   |         |
| ACaP1C  | 16 | #### | rs7520038 | G | A | . | PA:RNU6-76F | ncRNA_NR_. | .         | .   |         |
| ACaP1C  | 17 | #### | .         | T | C | . | PA:ATAD5    | intronic   | NM_.      | .   | .       |
| ACaP1C  | 17 | #### | rs3713755 | C | T | . | PA:CCL4     | exonic     | NM_.      | syr | CCL4:N  |
| ACaP1C  | 17 | #### | rs7744485 | C | T | . | PA:KRT24    | exonic     | NM_.      | syr | KRT24:  |
| ACaP1C  | 17 | #### | rs7460185 | G | A | . | PA:ACSF2    | exonic     | NM_.      | syr | ACSF2:  |
| ACaP1C  | 17 | #### | rs8668152 | T | G | . | PA:CLTC     | intronic   | NM_.      | .   | .       |
| ACaP1C  | 17 | #### | rs8665784 | T | G | . | PA:TBC1D3P  | ncRNA_NR_. | .         | .   |         |
| ACaP1C  | 17 | #### | .         | G | C | . | PA: 9-Sep   | exonic     | NM_.      | mis | SEPT9:  |
| ACaP1C  | 17 | #### | rs1995663 | G | A | . | PA:CBX2     | exonic     | NM_.      | syr | CBX2:N  |
| ACaP1C  | 17 | #### | .         | G | T | . | PA:TBCD     | UTR5       | NM_NM_.   | .   | .       |
| ACaP1C  | 19 | #### | rs3865492 | C | G | . | PA:.        | intergen   | NR_dist=. | .   | .       |
| ACaP1C  | 19 | #### | .         | T | C | . | PA:.        | intergen   | NR_dist=. | .   | .       |
| ACaP1C  | 19 | #### | rs7571526 | G | A | . | PA:GRIK5    | exonic     | NM_.      | syr | GRIK5:† |
| ACaP1C  | 19 | #### | rs7565559 | G | A | . | PA:APOC4    | exonic     | NM_.      | syr | APOC4   |
| ACaP1C  | 20 | #### | .         | G | A | . | PA:SIRPB1   | exonic     | NM_.      | syr | SIRPB1  |
| ACaP1C  | 20 | #### | .         | C | T | . | PA:COX4I2   | intronic   | NM_.      | .   | .       |
| ACaP1C  | 20 | #### | rs3774092 | G | A | . | PA:MROH8    | exonic     | NM_.      | un† | UNKNC   |
| ACaP1C  | 21 | #### | .         | C | A | . | PA:COL18A1- | ncRNA_NR_. | .         | .   | .       |
| ACaP1C  | 22 | #### | rs6197100 | A | G | . | PA:.        | intergen   | NM_dist=. | .   | .       |
| ACaP1C  | 22 | #### | .         | A | G | . | PA:FAM230B  | ncRNA_NR_. | .         | .   | .       |
| ACaP1C  | 22 | #### | rs5662423 | G | C | . | PA:POM121L  | ncRNA_NR_. | .         | .   | .       |
| ACaP1C  | 22 | #### | .         | C | G | . | PA:.        | intergen   | NR_dist=. | .   | .       |
| ACaP1C  | 22 | #### | rs1007675 | G | A | . | PA:KIAA0930 | intronic   | NM_.      | .   | .       |
| ACaP1CX |    | #### | .         | G | C | . | PA:HDAC6    | intronic   | NM_.      | .   | .       |
| ACaP1CX |    | #### | .         | G | A | . | PA:GPKOW    | intronic   | NM_.      | .   | .       |
| ACaP1CX |    | #### | rs7970448 | C | T | . | PA:CLCN5    | exonic     | NM_.      | sto | CLCN5:  |
| ACaP1CX |    | #### | .         | A | G | . | PA:ITIH6    | exonic     | NM_.      | mis | ITIH6:N |
| ACaP1CX |    | #### | .         | C | T | . | PA:CSAG1    | UTR5       | NM_NM_.   | .   | .       |
| ACaP11  | 1  | #### | rs4634900 | A | G | . | PA:.        | intergen   | NM_dist=. | .   | .       |
| ACaP11  | 1  | #### | .         | G | A | . | PA:CSMD2    | intronic   | NM_.      | .   | .       |

|        |    |      |           |   |   |   |            |            |           |             |
|--------|----|------|-----------|---|---|---|------------|------------|-----------|-------------|
| ACaP11 | 1  | #### | rs7450506 | G | T | . | PA:.       | intergen   | NR_dist=. | .           |
| ACaP11 | 1  | #### | rs2016919 | T | A | . | PA:.       | intergen   | NR_dist=. | .           |
| ACaP11 | 1  | #### | .         | A | T | . | PA:.       | intergen   | NR_dist=. | .           |
| ACaP11 | 1  | #### | rs8662584 | G | T | . | PA:.       | intergen   | NR_dist=. | .           |
| ACaP11 | 1  | #### | rs4143495 | G | A | . | PA:NBPF25P | ncRNA_NR_. | .         | .           |
| ACaP11 | 1  | #### | rs6181077 | C | T | . | PA:NBPF8   | intronic   | NM_.      | .           |
| ACaP11 | 1  | #### | .         | G | T | . | PA:CD1D    | UTR5       | NM_NM_.   | .           |
| ACaP11 | 1  | #### | rs2003501 | G | A | . | PA:SLC26A9 | intronic   | NM_.      | .           |
| ACaP11 | 2  | #### | .         | G | A | . | PA:USP34   | intronic   | NM_.      | .           |
| ACaP11 | 2  | #### | rs1834895 | C | T | . | PA:DYSF    | intronic   | NM_.      | .           |
| ACaP11 | 2  | #### | rs2009908 | C | T | . | PA:DYSF    | exonic     | NM_.      | mi: DYSF:M  |
| ACaP11 | 2  | #### | .         | G | C | . | PA:WBP1    | exonic     | NM_.      | mi: WBP1:f  |
| ACaP11 | 2  | #### | rs9528    | T | C | . | PA:TMEM131 | intronic   | NM_.      | .           |
| ACaP11 | 2  | #### | .         | A | G | . | PA:EPC2    | UTR3       | NM_NM_.   | .           |
| ACaP11 | 2  | #### | rs3739748 | G | A | . | PA:GPC1    | exonic     | NM_.      | mi: GPC1:M  |
| ACaP11 | 3  | #### | rs5683253 | C | T | . | PA:.       | intergen   | NM_dist=. | .           |
| ACaP11 | 3  | #### | rs1474450 | C | T | . | PA:SEMA3F  | intronic   | NM_.      | .           |
| ACaP11 | 3  | #### | rs2004359 | G | A | . | PA:ABHD14A | exonic     | NM_.      | mi: ABHD1:  |
| ACaP11 | 3  | #### | .         | C | T | . | PA:ARHGAP3 | exonic     | NM_.      | sto ARHGA   |
| ACaP11 | 4  | #### | .         | T | G | . | PA:LRPAP1  | intronic   | NM_.      | .           |
| ACaP11 | 4  | #### | .         | T | C | . | PA:JAKMIP1 | intronic   | NM_.      | .           |
| ACaP11 | 4  | #### | .         | G | A | . | PA:SH3TC1  | exonic     | NM_.      | syr SH3TC   |
| ACaP11 | 4  | #### | .         | G | A | . | PA:LIMCH1  | intronic   | NM_.      | .           |
| ACaP11 | 4  | #### | rs2932367 | A | T | . | PA:.       | intergen   | NM_dist=. | .           |
| ACaP11 | 4  | #### | .         | T | C | . | PA:.       | intergen   | NM_dist=. | .           |
| ACaP11 | 4  | #### | .         | G | A | . | PA:USP46   | intronic   | NM_.      | .           |
| ACaP11 | 4  | #### | rs7669673 | C | T | . | PA:GK2     | exonic     | NM_.      | syr GK2:NM  |
| ACaP11 | 5  | #### | .         | C | T | . | PA:ERCC8   | intronic   | NM_.      | .           |
| ACaP11 | 5  | #### | .         | C | A | . | PA:.       | upstream   | NM_.      | .           |
| ACaP11 | 5  | #### | .         | G | A | . | PA:SLCO4C1 | exonic     | NM_.      | mi: SLCO4:  |
| ACaP11 | 5  | #### | .         | G | A | . | PA:YIPF5   | UTR3       | NM_NM_.   | .           |
| ACaP11 | 5  | #### | rs5319092 | G | A | . | PA:ABLIM3  | UTR3       | NM_NM_.   | .           |
| ACaP11 | 6  | #### | rs5661365 | A | T | . | PA:SYCP2L  | intronic   | NM_.      | .           |
| ACaP11 | 6  | #### | .         | C | T | . | PA:HLA-G   | intronic   | NM_.      | .           |
| ACaP11 | 6  | #### | .         | C | A | . | PA:TNXB    | exonic     | NM_.      | syr TNXB:M  |
| ACaP11 | 7  | #### | rs1814105 | G | A | . | PA:INTS1   | exonic     | NM_.      | syr INTS1:f |
| ACaP11 | 7  | #### | rs7827655 | G | A | . | PA:.       | intergen   | NR_dist=. | .           |
| ACaP11 | 7  | #### | rs1484992 | G | A | . | PA:RUNDC3E | intronic   | NM_.      | .           |
| ACaP11 | 7  | #### | rs5523938 | A | T | . | PA:EPHB4   | intronic   | NM_.      | .           |
| ACaP11 | 7  | #### | .         | G | T | . | PA:DGKI    | exonic     | NM_.      | syr DGKI:N  |
| ACaP11 | 7  | #### | rs3737114 | G | A | . | PA:DGKI    | intronic   | NM_.      | .           |
| ACaP11 | 7  | #### | .         | C | T | . | PA:OR2A25  | exonic     | NM_.      | syr OR2A2:  |
| ACaP11 | 8  | #### | rs9982298 | G | A | . | PA:SNTG1   | intronic   | NM_.      | .           |
| ACaP11 | 8  | #### | .         | C | T | . | PA:OTUD6B  | exonic     | NM_.      | mi: OTUD6   |
| ACaP11 | 9  | #### | .         | G | A | . | PA:GLIS3   | exonic     | NM_.      | mi: GLIS3:f |
| ACaP11 | 9  | #### | .         | G | A | . | PA:.       | intergen   | NR_dist=. | .           |
| ACaP11 | 9  | #### | rs9330412 | T | C | . | PA:.       | intergen   | NR_dist=. | .           |
| ACaP11 | 9  | #### | .         | G | A | . | PA:C9orf89 | intronic   | NM_.      | .           |
| ACaP11 | 9  | #### | .         | C | A | . | PA:.       | intergen   | NM_dist=. | .           |
| ACaP11 | 9  | #### | rs9459874 | G | A | . | PA:GPSM1   | exonic     | NM_.      | mi: GPSM1   |
| ACaP11 | 9  | #### | rs9494422 | C | T | . | PA:CACNA1E | intronic   | NM_.      | .           |
| ACaP11 | 10 | #### | .         | C | G | . | PA:GPR158  | exonic     | NM_.      | mi: GPR15:  |
| ACaP11 | 10 | #### | .         | T | A | . | PA:ZNF33A  | exonic     | NM_.      | mi: ZNF33:/ |
| ACaP11 | 10 | #### | rs2996811 | G | A | . | PA:.       | intergen   | NR_dist=. | .           |

|         |    |      |           |   |   |   |             |           |          |     |         |
|---------|----|------|-----------|---|---|---|-------------|-----------|----------|-----|---------|
| ACaP11  | 10 | #### | .         | G | C | . | PA:AGAP6    | intronic  | NM_      | .   | .       |
| ACaP11  | 10 | #### | .         | G | C | . | PA:ENTPD1-7 | ncRNA_NR_ | .        | .   |         |
| ACaP11  | 10 | #### | rs7792060 | G | A | . | PA:PI4K2A   | intronic  | NM_      | .   | .       |
| ACaP11  | 11 | #### | .         | T | A | . | PA:PARVA    | intronic  | NM_      | .   | .       |
| ACaP11  | 11 | #### | .         | C | A | . | PA:ATM      | intronic  | NM_      | .   | .       |
| ACaP11  | 11 | #### | .         | T | G | . | PA:HYOU1    | exonic    | NM_      | mi  | HYOU1   |
| ACaP11  | 11 | #### | .         | T | C | . | PA:GLB1L2   | intronic  | NM_      | .   | .       |
| ACaP11  | 12 | #### | .         | T | C | . | PA:CLEC4C   | intronic  | NM_      | .   | .       |
| ACaP11  | 12 | #### | .         | G | A | . | PA:ETV6     | exonic    | NM_      | mi  | ETV6:N  |
| ACaP11  | 12 | #### | rs1219135 | C | T | . | PA:KRAS     | exonic    | NM_      | mi  | KRAS:N  |
| ACaP11  | 12 | #### | rs3522560 | G | A | . | PA:KIF5A    | exonic    | NM_      | syr | KIF5A:N |
| ACaP11  | 12 | #### | .         | T | A | . | PA:KCNC2    | UTR3      | NM_NM_   | .   | .       |
| ACaP11  | 12 | #### | rs5396169 | G | A | . | PA:GNN      | ncRNA_NR_ | .        | .   |         |
| ACaP11  | 13 | #### | .         | G | A | . | PA:.        | intergen  | NM_dist= | .   | .       |
| ACaP11  | 14 | #### | .         | C | T | . | PA:CNIH1    | intronic  | NM_      | .   | .       |
| ACaP11  | 14 | #### | rs8791962 | G | A | . | PA:.        | intergen  | NM_dist= | .   | .       |
| ACaP11  | 15 | #### | .         | G | A | . | PA:LOC72792 | ncRNA_NR_ | .        | .   |         |
| ACaP11  | 15 | #### | .         | A | G | . | PA:NDN      | exonic    | NM_      | mi  | NDN:N   |
| ACaP11  | 15 | #### | .         | C | T | . | PA:GABRA5   | exonic    | NM_      | mi  | GABRA   |
| ACaP11  | 15 | #### | rs7831577 | A | C | . | PA:.        | intergen  | NM_dist= | .   | .       |
| ACaP11  | 15 | #### | rs2010114 | T | A | . | PA:.        | intergen  | NR_dist= | .   | .       |
| ACaP11  | 16 | #### | .         | G | A | . | PA:ZKSCAN2  | intronic  | NM_      | .   | .       |
| ACaP11  | 16 | #### | .         | T | C | . | PA:RNU6-76F | ncRNA_NR_ | .        | .   |         |
| ACaP11  | 16 | #### | .         | C | A | . | PA:CBLN1    | intronic  | NM_      | .   | .       |
| ACaP11  | 16 | #### | rs2001829 | A | C | . | PA:PDXDC2F  | ncRNA_NR_ | .        | .   |         |
| ACaP11  | 16 | #### | .         | C | A | . | PA:PLCG2    | intronic  | NM_      | .   | .       |
| ACaP11  | 17 | #### | .         | C | T | . | PA:RFFL     | exonic    | NM_      | syr | RFFL:N  |
| ACaP11  | 17 | #### | .         | C | T | . | PA:.        | upstream  | NM_      | .   | .       |
| ACaP11  | 17 | #### | .         | C | A | . | PA:.        | intergen  | NM_dist= | .   | .       |
| ACaP11  | 17 | #### | .         | C | G | . | PA:BAHCC1   | intronic  | NM_      | .   | .       |
| ACaP11  | 18 | #### | .         | T | A | . | PA:SERPINB1 | intronic  | NM_      | .   | .       |
| ACaP11  | 19 | #### | rs8673654 | T | C | . | PA:ZFR2     | intronic  | NM_      | .   | .       |
| ACaP11  | 19 | #### | .         | A | T | . | PA:FLJ22184 | exonic    | NM_      | unl | UNKNC   |
| ACaP11  | 19 | #### | rs7680686 | C | T | . | PA:DOCK6    | exonic    | NM_      | mi  | DOCK6   |
| ACaP11  | 19 | #### | .         | A | T | . | PA:LRFN3    | exonic    | NM_      | mi  | LRFN3:  |
| ACaP11  | 19 | #### | .         | G | A | . | PA:.        | intergen  | NM_dist= | .   | .       |
| ACaP11  | 19 | #### | .         | C | T | . | PA:ZNF225   | exonic    | NM_      | syr | ZNF225  |
| ACaP11  | 19 | #### | .         | G | A | . | PA:LILRA5   | intronic  | NM_      | .   | .       |
| ACaP11  | 19 | #### | .         | G | A | . | PA:NLRP2    | intronic  | NM_      | .   | .       |
| ACaP11  | 19 | #### | rs7705940 | G | A | . | PA:ZNF814   | exonic    | NM_      | syr | ZNF814  |
| ACaP11  | 20 | #### | .         | G | A | . | PA:STK35    | exonic    | NM_      | mi  | STK35:  |
| ACaP11  | 20 | #### | rs2002254 | G | A | . | PA:CST11    | intronic  | NM_      | .   | .       |
| ACaP11  | 20 | #### | .         | G | T | . | PA:FAM83D   | exonic    | NM_      | mi  | FAM83D  |
| ACaP11  | 20 | #### | .         | C | T | . | PA:.        | intergen  | NM_dist= | .   | .       |
| ACaP11  | 21 | #### | .         | T | G | . | PA:NCAM2    | exonic    | NM_      | mi  | NCAM2   |
| ACaP11  | 22 | #### | .         | G | A | . | PA:SYN3     | exonic    | NM_      | syr | SYN3:N  |
| ACaP11X |    | #### | .         | C | G | . | PA:.        | intergen  | NM_dist= | .   | .       |
| ACaP11X |    | #### | .         | G | A | . | PA:ARMCX2   | exonic    | NM_      | syr | ARMCX   |
| ACaP11X |    | #### | .         | C | T | . | PA:TEX13A   | exonic    | NM_      | mi  | TEX13A  |
| ACaP11X |    | #### | rs7533837 | C | T | . | PA:NRK      | exonic    | NM_      | syr | NRK:N   |
| ACaP11X |    | #### | .         | C | T | . | PA:SH2D1A   | intronic  | NM_      | .   | .       |
| ACaP11X |    | #### | rs7767123 | C | T | . | PA:MAP7D3   | intronic  | NM_      | .   | .       |
| ACaP11X |    | #### | .         | C | A | . | PA:.        | intergen  | NM_dist= | .   | .       |
| ACaP11X |    | #### | rs3981235 | G | A | . | PA:G6PD     | exonic    | NM_      | mi  | G6PD:N  |



|          |      |      |           |   |   |      |             |            |           |             |
|----------|------|------|-----------|---|---|------|-------------|------------|-----------|-------------|
| ACaP11MT | #### | .    | A         | G | . | PA:. | intergen    | NOI        | dist=.    | .           |
| ACaP12   | 1    | #### | .         | C | T | .    | PA:PGD      | intronic   | NM_.      | .           |
| ACaP12   | 1    | #### | rs1015792 | T | C | .    | PA:CROCCP2  | ncRNA_NR_. | .         | .           |
| ACaP12   | 1    | #### | .         | C | T | .    | PA:TAS1R2   | exonic     | NM_.      | syr TAS1R:  |
| ACaP12   | 1    | #### | rs1453424 | G | A | .    | PA:RAP1GAF  | exonic     | NM_.      | mis RAP1G   |
| ACaP12   | 1    | #### | .         | G | T | .    | PA:BTBD8    | exonic     | NM_.      | sto BTBD8:  |
| ACaP12   | 1    | #### | rs7704066 | T | C | .    | PA:.        | intergen   | NR_dist=. | .           |
| ACaP12   | 1    | #### | rs1415172 | A | G | .    | PA:.        | intergen   | NR_dist=. | .           |
| ACaP12   | 1    | #### | rs1256214 | A | G | .    | PA:.        | intergen   | NR_dist=. | .           |
| ACaP12   | 1    | #### | rs3721624 | C | T | .    | PA:NBP25P   | ncRNA_NR_. | .         | .           |
| ACaP12   | 1    | #### | rs5876752 | C | T | .    | PA:NBP25P   | ncRNA_NR_. | .         | .           |
| ACaP12   | 1    | #### | .         | A | G | .    | PA:NBP25P   | ncRNA_NR_. | .         | .           |
| ACaP12   | 1    | #### | rs3730063 | C | T | .    | PA:CA14     | exonic     | NM_.      | syr CA14:N  |
| ACaP12   | 1    | #### | .         | G | C | .    | PA:NCF2     | intronic   | NM_.      | .           |
| ACaP12   | 1    | #### | .         | C | G | .    | PA:KCNH1    | exonic     | NM_.      | mis KCNH1   |
| ACaP12   | 2    | #### | .         | G | A | .    | PA:KCNK12   | exonic     | NM_.      | mis KCNK1:  |
| ACaP12   | 2    | #### | rs7540104 | G | A | .    | PA:.        | intergen   | NR_dist=. | .           |
| ACaP12   | 2    | #### | .         | G | A | .    | PA:GALNT13  | intronic   | NM_.      | .           |
| ACaP12   | 2    | #### | .         | C | A | .    | PA:MIR548N  | ncRNA_NR_. | .         | .           |
| ACaP12   | 2    | #### | .         | G | T | .    | PA:HSPD1    | intronic   | NM_.      | .           |
| ACaP12   | 2    | #### | rs9825331 | G | A | .    | PA:SH3BP4   | intronic   | NM_.      | .           |
| ACaP12   | 3    | #### | .         | A | G | .    | PA:SUMF1    | intronic   | NM_.      | .           |
| ACaP12   | 3    | #### | rs1309395 | A | G | .    | PA:BHLHE40  | UTR3       | NM_NM_.   | .           |
| ACaP12   | 3    | #### | .         | A | C | .    | PA:CMTM7    | intronic   | NM_.      | .           |
| ACaP12   | 3    | #### | rs3710999 | G | A | .    | PA:GORASP1  | intronic   | NM_.      | .           |
| ACaP12   | 3    | #### | .         | G | T | .    | PA:EIF1B-AS | ncRNA_NR_. | .         | .           |
| ACaP12   | 3    | #### | .         | G | A | .    | PA:QRICH1   | exonic     | NM_.      | mis QRICH:  |
| ACaP12   | 3    | #### | .         | G | A | .    | PA:BSN      | exonic     | NM_.      | syr BSN:NM  |
| ACaP12   | 3    | #### | .         | G | T | .    | PA:BSN      | exonic     | NM_.      | mis BSN:NM  |
| ACaP12   | 3    | #### | .         | C | T | .    | PA:CACNA2C  | intronic   | NM_.      | .           |
| ACaP12   | 3    | #### | .         | T | C | .    | PA:.        | intergen   | NM_dist=. | .           |
| ACaP12   | 3    | #### | rs5729372 | T | C | .    | PA:ALDH1L1- | ncRNA_NR_. | .         | .           |
| ACaP12   | 4    | #### | rs4970287 | C | T | .    | PA:.        | intergen   | NOI       | dist=.      |
| ACaP12   | 4    | #### | rs1456513 | C | T | .    | PA:.        | intergen   | NM_dist=. | .           |
| ACaP12   | 4    | #### | .         | G | A | .    | PA:AFF1     | exonic     | NM_.      | mis AFF1:N  |
| ACaP12   | 4    | #### | .         | A | G | .    | PA:SNHG8    | ncRNA_NR_. | .         | .           |
| ACaP12   | 4    | #### | rs3727861 | C | T | .    | PA:FAT4     | exonic     | NM_.      | mis FAT4:N  |
| ACaP12   | 4    | #### | .         | C | T | .    | PA:GALNT7   | exonic     | NM_.      | mis GALNT   |
| ACaP12   | 4    | #### | .         | A | G | .    | PA:TRIML2   | intronic   | NM_.      | .           |
| ACaP12   | 5    | #### | .         | G | C | .    | PA:ABLIM3   | UTR3       | NM_NM_.   | .           |
| ACaP12   | 5    | #### | .         | C | A | .    | PA:HAVCR1   | intronic   | NM_.      | .           |
| ACaP12   | 6    | #### | .         | C | G | .    | PA:MOG      | UTR3       | NM_NM_.   | .           |
| ACaP12   | 6    | #### | .         | C | G | .    | PA:DNAH8    | intronic   | NM_.      | .           |
| ACaP12   | 6    | #### | rs9010911 | C | T | .    | PA:.        | upstream   | NR_.      | .           |
| ACaP12   | 6    | #### | .         | A | T | .    | PA:CEP85L   | intronic   | NM_.      | .           |
| ACaP12   | 7    | #### | rs1544467 | G | C | .    | PA:ZNF890P  | ncRNA_NR_. | .         | .           |
| ACaP12   | 7    | #### | .         | G | C | .    | PA:USP42    | intronic   | NM_.      | .           |
| ACaP12   | 7    | #### | .         | C | G | .    | PA:STK31    | intronic   | NM_.      | .           |
| ACaP12   | 7    | #### | .         | C | A | .    | PA:HOXA10-  | ncRNA_NR_. | .         | .           |
| ACaP12   | 7    | #### | .         | T | C | .    | PA:TBRG4    | exonic     | NM_.      | mis TBRG4   |
| ACaP12   | 7    | #### | rs1929995 | G | A | .    | PA:.        | intergen   | NM_dist=. | .           |
| ACaP12   | 7    | #### | .         | T | G | .    | PA:TYW1     | intronic   | NM_.      | .           |
| ACaP12   | 7    | #### | .         | G | A | .    | PA:HIP1     | exonic     | NM_.      | syr HIP1:NI |
| ACaP12   | 7    | #### | .         | T | A | .    | PA:PON2     | splicing   | NM_NM_.   | .           |

|        |    |      |           |   |   |   |              |            |           |        |        |
|--------|----|------|-----------|---|---|---|--------------|------------|-----------|--------|--------|
| ACaP12 | 7  | #### | .         | G | C | . | PA:TRRAP     | exonic     | NM_.      | mi     | TRRAP  |
| ACaP12 | 7  | #### | rs5753233 | C | T | . | PA:CHCHD3    | intronic   | NM_.      | .      | .      |
| ACaP12 | 7  | #### | .         | G | A | . | PA:NUP205    | intronic   | NM_.      | .      | .      |
| ACaP12 | 8  | #### | .         | G | A | . | PA:.         | intergen   | NOI       | dist=. | .      |
| ACaP12 | 8  | #### | .         | G | C | . | PA:LACTB2    | exonic     | NM_.      | mi     | LACTB: |
| ACaP12 | 8  | #### | rs5472481 | T | C | . | PA:LOC3922   | ncRNA_NR_. | .         | .      | .      |
| ACaP12 | 8  | #### | .         | G | C | . | PA:ATP6V0D   | intronic   | NM_.      | .      | .      |
| ACaP12 | 9  | #### | rs3746546 | C | T | . | PA:LINGO2    | intronic   | NM_.      | .      | .      |
| ACaP12 | 9  | #### | .         | C | T | . | PA:KIAA1161  | exonic     | NM_.      | unl    | UNKNC  |
| ACaP12 | 9  | #### | .         | C | T | . | PA:APBA1     | exonic     | NM_.      | mi     | APBA1: |
| ACaP12 | 9  | #### | .         | C | T | . | PA:PCSK5     | exonic     | NM_.      | mi     | PCSK5: |
| ACaP12 | 9  | #### | rs2868900 | G | A | . | PA:.         | intergen   | NM_dist=. | .      | .      |
| ACaP12 | 9  | #### | rs3719801 | C | T | . | PA:MIR455    | ncRNA_NR_. | .         | .      | .      |
| ACaP12 | 9  | #### | rs9976753 | G | A | . | PA:CARD9     | intronic   | NM_.      | .      | .      |
| ACaP12 | 9  | #### | rs3763504 | C | T | . | PA:SEC16A    | exonic     | NM_.      | mi     | SEC16/ |
| ACaP12 | 10 | #### | rs9266937 | C | T | . | PA:PITRM1-A  | ncRNA_NR_. | .         | .      | .      |
| ACaP12 | 10 | #### | .         | A | T | . | PA:PARD3     | intronic   | NM_.      | .      | .      |
| ACaP12 | 10 | #### | .         | A | G | . | PA:SYT15     | intronic   | NM_.      | .      | .      |
| ACaP12 | 10 | #### | .         | T | A | . | PA:USP54     | exonic     | NM_.      | sto    | USP54: |
| ACaP12 | 10 | #### | .         | T | G | . | PA:IDE       | intronic   | NM_.      | .      | .      |
| ACaP12 | 10 | #### | .         | A | C | . | PA:DOCK1     | intronic   | NM_.      | .      | .      |
| ACaP12 | 11 | #### | .         | A | C | . | PA:.         | downstr    | NM_.      | .      | .      |
| ACaP12 | 11 | #### | .         | C | T | . | PA:TPH1      | intronic   | NM_.      | .      | .      |
| ACaP12 | 11 | #### | .         | T | A | . | PA:HPS5      | intronic   | NM_.      | .      | .      |
| ACaP12 | 11 | #### | .         | C | T | . | PA:.         | intergen   | NM_dist=. | .      | .      |
| ACaP12 | 11 | #### | rs3696017 | C | T | . | PA:SLC43A3   | intronic   | NM_.      | .      | .      |
| ACaP12 | 11 | #### | .         | C | T | . | PA:C11orf86  | intronic   | NM_.      | .      | .      |
| ACaP12 | 11 | #### | .         | G | A | . | PA:CWF19L2   | exonic     | NM_.      | sto    | CWF19  |
| ACaP12 | 11 | #### | .         | G | A | . | PA:USP2-AS1  | ncRNA_NR_. | .         | .      | .      |
| ACaP12 | 12 | #### | .         | A | C | . | PA:COL2A1    | intronic   | NM_.      | .      | .      |
| ACaP12 | 12 | #### | .         | G | C | . | PA:DEPDC4    | exonic     | NM_.      | mi     | DEPDC  |
| ACaP12 | 12 | #### | rs8683709 | T | C | . | PA:HECTD4    | intronic   | NM_.      | .      | .      |
| ACaP12 | 12 | #### | .         | G | A | . | PA:MED13L    | intronic   | NM_.      | .      | .      |
| ACaP12 | 12 | #### | rs5681239 | C | T | . | PA:HNF1A     | exonic     | NM_.      | mi     | HNF1A: |
| ACaP12 | 13 | #### | rs7528858 | C | T | . | PA:DOCK9     | intronic   | NM_.      | .      | .      |
| ACaP12 | 14 | #### | .         | T | C | . | PA:PRMT5     | exonic     | NM_.      | mi     | PRMT5  |
| ACaP12 | 14 | #### | rs1288039 | A | G | . | PA:.         | intergen   | NM_dist=. | .      | .      |
| ACaP12 | 14 | #### | rs5316143 | G | A | . | PA:.         | upstrear   | NR_.      | .      | .      |
| ACaP12 | 15 | #### | .         | C | G | . | PA:NDN       | exonic     | NM_.      | mi     | NDN:NI |
| ACaP12 | 15 | #### | rs7540721 | C | T | . | PA:TJP1      | exonic     | NM_.      | mi     | TJP1:N |
| ACaP12 | 15 | #### | rs2015691 | A | C | . | PA:CHRFAM7   | UTR5       | NM_NM_.   | .      | .      |
| ACaP12 | 15 | #### | rs7122570 | C | G | . | PA:ULK4P1,U  | ncRNA_NR_. | .         | .      | .      |
| ACaP12 | 15 | #### | .         | G | A | . | PA:NUTM1     | exonic     | NM_.      | syr    | NUTM1  |
| ACaP12 | 15 | #### | .         | C | T | . | PA:EIF3J-AS1 | ncRNA_NR_. | .         | .      | .      |
| ACaP12 | 15 | #### | rs1869226 | T | A | . | PA:LOC6457   | ncRNA_NR_. | .         | .      | .      |
| ACaP12 | 15 | #### | rs8789048 | A | G | . | PA:LOC6457   | ncRNA_NR_. | .         | .      | .      |
| ACaP12 | 15 | #### | .         | C | T | . | PA:TBC1D2B   | exonic     | NM_.      | mi     | TBC1D: |
| ACaP12 | 15 | #### | .         | A | T | . | PA:CPEB1     | intronic   | NM_.      | .      | .      |
| ACaP12 | 16 | #### | rs7655357 | C | T | . | PA:TBL3      | exonic     | NM_.      | syr    | TBL3:N |
| ACaP12 | 16 | #### | rs2015706 | G | A | . | PA:NLRC3     | exonic     | NM_.      | syr    | NLRC3: |
| ACaP12 | 16 | #### | .         | T | C | . | PA:C16orf89  | intronic   | NM_.      | .      | .      |
| ACaP12 | 16 | #### | .         | C | T | . | PA:CHST4     | exonic     | NM_.      | syr    | CHST4  |
| ACaP12 | 17 | #### | .         | C | G | . | PA:SMYD4     | intronic   | NM_.      | .      | .      |
| ACaP12 | 17 | #### | .         | G | A | . | PA:ITGAE     | intronic   | NM_.      | .      | .      |

|         |    |      |           |   |   |   |            |          |           |     |         |
|---------|----|------|-----------|---|---|---|------------|----------|-----------|-----|---------|
| ACaP12  | 17 | #### | rs7781206 | T | C | . | PA:RPAIN   | intronic | NM_.      | .   | .       |
| ACaP12  | 17 | #### | .         | C | T | . | PA:ANKFN1  | intronic | NM_.      | .   | .       |
| ACaP12  | 17 | #### | rs1134430 | C | T | . | PA:FDXR    | intronic | NM_.      | .   | .       |
| ACaP12  | 17 | #### | .         | G | A | . | PA:ITGB4   | intronic | NM_.      | .   | .       |
| ACaP12  | 17 | #### | rs7648089 | G | A | . | PA:RPTOR   | exonic   | NM_.      | syr | RPTOR   |
| ACaP12  | 17 | #### | .         | C | T | . | PA:P4HB    | intronic | NM_.      | .   | .       |
| ACaP12  | 17 | #### | rs3729739 | C | T | . | PA:CD7     | exonic   | NM_.      | mis | CD7:NM  |
| ACaP12  | 17 | #### | .         | C | G | . | PA:B3GNTL1 | intronic | NM_.      | .   | .       |
| ACaP12  | 17 | #### | .         | C | G | . | PA:B3GNTL1 | intronic | NM_.      | .   | .       |
| ACaP12  | 18 | #### | .         | C | T | . | PA:ENOSF1  | UTR3     | NM_NM_.   | .   | .       |
| ACaP12  | 18 | #### | .         | C | T | . | PA:ENOSF1  | UTR3     | NM_NM_.   | .   | .       |
| ACaP12  | 18 | #### | .         | A | C | . | PA:ZNF24   | intronic | NM_.      | .   | .       |
| ACaP12  | 19 | #### | rs5282381 | C | T | . | PA:NFIC    | intronic | NM_.      | .   | .       |
| ACaP12  | 19 | #### | .         | G | A | . | PA:NFIC    | intronic | NM_.      | .   | .       |
| ACaP12  | 19 | #### | rs9075262 | G | A | . | PA:NFIC    | intronic | NM_.      | .   | .       |
| ACaP12  | 19 | #### | .         | G | T | . | PA:NFIC    | intronic | NM_.      | .   | .       |
| ACaP12  | 19 | #### | .         | C | A | . | PA:ZNF561  | intronic | NM_.      | .   | .       |
| ACaP12  | 19 | #### | .         | C | T | . | PA:ZSWIM4  | intronic | NM_.      | .   | .       |
| ACaP12  | 19 | #### | .         | A | C | . | PA:ZNF573  | exonic   | NM_.      | mis | ZNF573  |
| ACaP12  | 19 | #### | .         | C | A | . | PA:ZNF233  | intronic | NM_.      | .   | .       |
| ACaP12  | 19 | #### | .         | G | C | . | PA:IZUMO1  | intronic | NM_.      | .   | .       |
| ACaP12  | 19 | #### | .         | G | A | . | PA:FUT1    | exonic   | NM_.      | sto | FUT1:N  |
| ACaP12  | 19 | #### | .         | G | A | . | PA:FUT1    | exonic   | NM_.      | mis | FUT1:N  |
| ACaP12  | 19 | #### | .         | C | T | . | PA:CLEC11A | exonic   | NM_.      | syr | CLEC1   |
| ACaP12  | 19 | #### | .         | C | A | . | PA:ZNF28   | intronic | NM_.      | .   | .       |
| ACaP12  | 19 | #### | .         | C | A | . | PA:CACNG7  | intronic | NM_.      | .   | .       |
| ACaP12  | 20 | #### | rs7457076 | C | T | . | PA:LPIN3   | exonic   | NM_.      | mis | LPIN3:N |
| ACaP12  | 21 | #### | .         | G | A | . | PA:.       | downstr  | NR_.      | .   | .       |
| ACaP12  | 21 | #### | rs8792017 | A | G | . | PA:.       | intergen | NR_dist=. | .   | .       |
| ACaP12  | 21 | #### | .         | A | C | . | PA:TPTE    | intronic | NM_.      | .   | .       |
| ACaP12  | 22 | #### | rs1167407 | C | T | . | PA:BCL2L13 | intronic | NM_.      | .   | .       |
| ACaP12  | 22 | #### | rs3760330 | A | G | . | PA:DGCR6   | intronic | NM_.      | .   | .       |
| ACaP12  | 22 | #### | .         | C | T | . | PA:SMTN    | exonic   | NM_.      | sto | SMTN:N  |
| ACaP12X |    | #### | .         | C | T | . | PA:RLIM    | exonic   | NM_.      | mis | RLIM:N  |
| ACaP12X |    | #### | .         | G | T | . | PA:MCF2    | exonic   | NM_.      | mis | MCF2:N  |
| ACaP12X |    | #### | .         | T | A | . | PA:MAGEC1  | UTR3     | NM_NM_.   | .   | .       |
| ACaP13  | 1  | #### | rs1153096 | T | C | . | PA:ATAD3B  | intronic | NM_.      | .   | .       |
| ACaP13  | 1  | #### | .         | T | G | . | PA:GABRD   | intronic | NM_.      | .   | .       |
| ACaP13  | 1  | #### | .         | G | A | . | PA:RSPO1   | UTR5     | NM_NM_.   | .   | .       |
| ACaP13  | 1  | #### | rs5317072 | C | T | . | PA:CCDC17  | exonic   | NM_.      | syr | CCDC1   |
| ACaP13  | 1  | #### | .         | T | A | . | PA:ZFYVE9  | intronic | NM_.      | .   | .       |
| ACaP13  | 1  | #### | rs7787296 | C | T | . | PA:DAB1    | UTR5     | NM_NM_.   | .   | .       |
| ACaP13  | 1  | #### | .         | C | T | . | PA:AGL     | exonic   | NM_.      | syr | AGL:NM  |
| ACaP13  | 1  | #### | rs7736232 | A | T | . | PA:.       | intergen | NR_dist=. | .   | .       |
| ACaP13  | 1  | #### | rs1712174 | A | C | . | PA:.       | intergen | NR_dist=. | .   | .       |
| ACaP13  | 1  | #### | .         | C | A | . | PA:LCE2D   | UTR3     | NM_NM_.   | .   | .       |
| ACaP13  | 1  | #### | .         | C | T | . | PA:UBAP2L  | intronic | NM_.      | .   | .       |
| ACaP13  | 1  | #### | .         | C | T | . | PA:NIT1    | intronic | NM_.      | .   | .       |
| ACaP13  | 1  | #### | .         | T | G | . | PA:LAMC2   | intronic | NM_.      | .   | .       |
| ACaP13  | 1  | #### | .         | G | T | . | PA:KCNT2   | intronic | NM_.      | .   | .       |
| ACaP13  | 1  | #### | .         | A | T | . | PA:C1orf53 | UTR5     | NM_NM_.   | .   | .       |
| ACaP13  | 1  | #### | .         | G | A | . | PA:KDM5B   | exonic   | NM_.      | mis | KDM5B   |
| ACaP13  | 1  | #### | .         | G | A | . | PA:SDCCAGξ | intronic | NM_.      | .   | .       |
| ACaP13  | 2  | #### | .         | C | T | . | PA:TRAPPC1 | exonic   | NM_.      | mis | TRAPP   |

|        |   |      |           |   |   |   |             |            |           |             |
|--------|---|------|-----------|---|---|---|-------------|------------|-----------|-------------|
| ACaP13 | 2 | #### | .         | C | T | . | PA:TRAPPC1  | exonic     | NM_.      | syr TRAPP   |
| ACaP13 | 2 | #### | .         | C | A | . | PA:NBAS     | exonic     | NM_.      | mis NBAS:N  |
| ACaP13 | 2 | #### | .         | G | T | . | PA:NLRC4    | exonic     | NM_.      | mis NLRC4:  |
| ACaP13 | 2 | #### | .         | G | A | . | PA:ANTXR1   | intronic   | NM_.      | .           |
| ACaP13 | 2 | #### | rs2015850 | T | C | . | PA:.        | intergen   | NM_dist=. | .           |
| ACaP13 | 2 | #### | .         | A | T | . | PA:ZAP70    | exonic     | NM_.      | mis ZAP70:  |
| ACaP13 | 2 | #### | rs2008974 | G | T | . | PA:RGPD3    | intronic   | NM_.      | .           |
| ACaP13 | 2 | #### | rs7249504 | G | T | . | PA:INSIG2   | intronic   | NM_.      | .           |
| ACaP13 | 2 | #### | .         | A | T | . | PA:INSIG2   | intronic   | NM_.      | .           |
| ACaP13 | 2 | #### | .         | G | A | . | PA:TTN      | exonic     | NM_.      | syr TTN:NM  |
| ACaP13 | 2 | #### | .         | C | A | . | PA:ICA1L    | UTR3       | NM_NM_.   | .           |
| ACaP13 | 2 | #### | rs5520376 | C | T | . | PA:ABI2     | intronic   | NM_.      | .           |
| ACaP13 | 2 | #### | .         | C | G | . | PA:ABI2     | intronic   | NM_.      | .           |
| ACaP13 | 2 | #### | rs1816528 | G | A | . | PA:LINC0060 | ncRNA_NR_. | .         | .           |
| ACaP13 | 2 | #### | .         | G | A | . | PA:PRSS56   | exonic     | NM_.      | mis PRSS56  |
| ACaP13 | 3 | #### | .         | C | G | . | PA:KIF15    | intronic   | NM_.      | .           |
| ACaP13 | 3 | #### | rs9185110 | C | G | . | PA:PTH1R    | intronic   | NM_.      | .           |
| ACaP13 | 3 | #### | rs3735896 | C | T | . | PA:STAB1    | intronic   | NM_.      | .           |
| ACaP13 | 3 | #### | .         | T | C | . | PA:DCBLD2   | intronic   | NM_.      | .           |
| ACaP13 | 3 | #### | .         | A | G | . | PA:DCBLD2   | exonic     | NM_.      | mis DCBLD   |
| ACaP13 | 3 | #### | .         | T | G | . | PA:RPL24    | intronic   | NM_.      | .           |
| ACaP13 | 3 | #### | .         | G | A | . | PA:ILDR1    | UTR3       | NM_NM_.   | .           |
| ACaP13 | 3 | #### | rs1456223 | C | T | . | PA:COL6A6   | exonic     | NM_.      | syr COL6A6  |
| ACaP13 | 3 | #### | rs1048860 | G | A | . | PA:PIK3CA   | exonic     | NM_.      | mis PIK3CA  |
| ACaP13 | 4 | #### | .         | T | G | . | PA:LRPAP1   | intronic   | NM_.      | .           |
| ACaP13 | 4 | #### | rs4018318 | C | T | . | PA:.        | intergen   | NR_dist=. | .           |
| ACaP13 | 4 | #### | .         | C | T | . | PA:ATP8A1   | intronic   | NM_.      | .           |
| ACaP13 | 4 | #### | .         | G | A | . | PA:ATP8A1   | intronic   | NM_.      | .           |
| ACaP13 | 4 | #### | .         | G | T | . | PA:.        | intergen   | NM_dist=. | .           |
| ACaP13 | 4 | #### | .         | G | C | . | PA:SCOC     | intronic   | NM_.      | .           |
| ACaP13 | 4 | #### | .         | C | G | . | PA:.        | intergen   | NM_dist=. | .           |
| ACaP13 | 5 | #### | .         | C | T | . | PA:GUSBP1   | ncRNA_NR_. | .         | .           |
| ACaP13 | 5 | #### | .         | G | A | . | PA:SKIV2L2  | splicing   | NM_NM_.   | .           |
| ACaP13 | 5 | #### | .         | G | A | . | PA:PRR16    | UTR5       | NM_NM_.   | .           |
| ACaP13 | 5 | #### | .         | A | T | . | PA:RAPGEF6  | intronic   | NM_.      | .           |
| ACaP13 | 5 | #### | rs7735798 | C | T | . | PA:PCDHGB4  | exonic     | NM_.      | mis PCDHG   |
| ACaP13 | 5 | #### | .         | C | T | . | PA:FGF18    | exonic     | NM_.      | syr FGF18:  |
| ACaP13 | 5 | #### | .         | G | A | . | PA:TBC1D9B  | exonic     | NM_.      | sto TBC1D9  |
| ACaP13 | 5 | #### | rs3761176 | C | T | . | PA:BTNL9    | exonic     | NM_.      | mis BTNL9:  |
| ACaP13 | 6 | #### | .         | C | T | . | PA:.        | upstream   | NM_.      | .           |
| ACaP13 | 6 | #### | rs1419237 | T | G | . | PA:DHX16    | exonic     | NM_.      | mis DHX16:  |
| ACaP13 | 6 | #### | rs3687466 | C | T | . | PA:LAMA4    | splicing   | NM_NM_.   | .           |
| ACaP13 | 6 | #### | .         | G | A | . | PA:RAET1G   | exonic     | NM_.      | syr RAET1G  |
| ACaP13 | 6 | #### | .         | G | A | . | PA:OPRM1    | exonic     | NM_.      | syr OPRM1   |
| ACaP13 | 6 | #### | rs2014763 | G | A | . | PA:TIAM2    | exonic     | NM_.      | mis TIAM2:l |
| ACaP13 | 6 | #### | rs3759780 | G | C | . | PA:.        | intergen   | NM_dist=. | .           |
| ACaP13 | 7 | #### | rs7676901 | A | G | . | PA:NUDCD3   | intronic   | NM_.      | .           |
| ACaP13 | 7 | #### | .         | T | C | . | PA:DDX56    | exonic     | NM_.      | mis DDX56:  |
| ACaP13 | 7 | #### | rs6246184 | G | A | . | PA:.        | intergen   | NR_dist=. | .           |
| ACaP13 | 7 | #### | rs2013722 | C | T | . | PA:.        | intergen   | NR_dist=. | .           |
| ACaP13 | 7 | #### | .         | C | G | . | PA:SBDS     | intronic   | NM_.      | .           |
| ACaP13 | 7 | #### | .         | C | T | . | PA:LOC54147 | ncRNA_NR_. | .         | .           |
| ACaP13 | 7 | #### | rs7611895 | G | A | . | PA:MUC12    | exonic     | NM_.      | mis MUC12   |
| ACaP13 | 7 | #### | .         | A | C | . | PA:KIAA1147 | intronic   | NM_.      | .           |

|        |    |      |           |   |   |             |           |           |             |
|--------|----|------|-----------|---|---|-------------|-----------|-----------|-------------|
| ACaP13 | 7  | #### | rs1419939 | A | T | PA:KMT2C    | exonic    | NM_       | syr KMT2C   |
| ACaP13 | 7  | #### | .         | G | A | PA:.        | intergen  | NM_dist=. | .           |
| ACaP13 | 8  | #### | .         | G | A | PA:TNKS     | intronic  | NM_       | .           |
| ACaP13 | 8  | #### | rs7484521 | C | A | PA:LOC72976 | ncRNA_NR_ | .         | .           |
| ACaP13 | 8  | #### | .         | A | C | PA:XPO7     | intronic  | NM_       | .           |
| ACaP13 | 8  | #### | .         | T | C | PA:SORBS3   | intronic  | NM_       | .           |
| ACaP13 | 8  | #### | .         | G | A | PA:MMP16    | exonic    | NM_       | mis MMP16   |
| ACaP13 | 8  | #### | rs5352633 | G | A | PA:RIMS2    | intronic  | NM_       | .           |
| ACaP13 | 8  | #### | rs5594625 | A | T | PA:CSMD3    | intronic  | NM_       | .           |
| ACaP13 | 8  | #### | rs3766154 | C | T | PA:ANXA13   | exonic    | NM_       | mis ANXA1:  |
| ACaP13 | 8  | #### | .         | G | A | PA:CCDC166  | intronic  | NM_       | .           |
| ACaP13 | 8  | #### | .         | G | A | PA:OPLAH    | exonic    | NM_       | mis OPLAH   |
| ACaP13 | 9  | #### | .         | G | T | PA:PSIP1    | exonic    | NM_       | syr PSIP1:† |
| ACaP13 | 9  | #### | .         | T | C | PA:CNTRLN   | intronic  | NM_       | .           |
| ACaP13 | 9  | #### | rs2803685 | G | T | PA:FAM27C   | ncRNA_NR_ | .         | .           |
| ACaP13 | 9  | #### | rs7553291 | G | A | PA:SPATA31  | exonic    | NM_       | syr SPATA:  |
| ACaP13 | 9  | #### | .         | A | G | PA:GAPVD1   | exonic    | NM_       | mis GAPVD   |
| ACaP13 | 10 | #### | rs1901417 | G | A | PA:PITRM1-A | ncRNA_NR_ | .         | .           |
| ACaP13 | 10 | #### | .         | G | T | PA:ITGB1    | exonic    | NM_       | mis ITGB1:† |
| ACaP13 | 10 | #### | rs4070334 | G | A | PA:.        | intergen  | NR_dist=. | .           |
| ACaP13 | 10 | #### | .         | C | T | PA:SFTPA2   | intronic  | NM_       | .           |
| ACaP13 | 10 | #### | .         | G | C | PA:KLLN     | UTR5      | NM_NM_    | .           |
| ACaP13 | 10 | #### | .         | G | A | PA:ENTPD1-7 | ncRNA_NR_ | .         | .           |
| ACaP13 | 11 | #### | rs7488284 | G | A | PA:MUC6     | exonic    | NM_       | syr MUC6:†  |
| ACaP13 | 11 | #### | .         | C | T | PA:USP47    | intronic  | NM_       | .           |
| ACaP13 | 11 | #### | .         | G | A | PA:ABCC8    | intronic  | NM_       | .           |
| ACaP13 | 11 | #### | .         | T | A | PA:LDHA     | intronic  | NM_       | .           |
| ACaP13 | 11 | #### | .         | C | T | PA:ANO3     | intronic  | NM_       | .           |
| ACaP13 | 11 | #### | rs1470918 | G | T | PA:METTL15  | intronic  | NM_       | .           |
| ACaP13 | 11 | #### | .         | A | T | PA:TMEM179  | UTR3      | NM_NM_    | .           |
| ACaP13 | 11 | #### | .         | G | A | PA:C11orf95 | exonic    | NM_       | mis C11orf9 |
| ACaP13 | 11 | #### | rs2010003 | C | A | PA:.        | intergen  | NM_dist=. | .           |
| ACaP13 | 11 | #### | .         | A | T | PA:DYNC2H1  | intronic  | NM_       | .           |
| ACaP13 | 12 | #### | .         | G | C | PA:NELL2    | UTR5      | NM_NM_    | .           |
| ACaP13 | 12 | #### | rs7761498 | A | G | PA:SLC4A8   | intronic  | NM_       | .           |
| ACaP13 | 12 | #### | .         | G | A | PA:PAN2     | exonic    | NM_       | mis PAN2:N  |
| ACaP13 | 12 | #### | .         | C | G | PA:ANKS1B   | intronic  | NM_       | .           |
| ACaP13 | 12 | #### | .         | G | A | PA:MMAB     | splicing  | NM_NM_    | .           |
| ACaP13 | 13 | #### | .         | C | G | PA:.        | upstream  | NR_       | .           |
| ACaP13 | 13 | #### | .         | C | A | PA:.        | intergen  | NM_dist=. | .           |
| ACaP13 | 13 | #### | .         | G | A | PA:.        | intergen  | NR_dist=. | .           |
| ACaP13 | 14 | #### | rs2259899 | C | A | PA:.        | intergen  | NR_dist=. | .           |
| ACaP13 | 14 | #### | rs7966403 | C | A | PA:.        | intergen  | NM_dist=. | .           |
| ACaP13 | 14 | #### | rs7511166 | C | T | PA:MMP14    | exonic    | NM_       | mis MMP14   |
| ACaP13 | 14 | #### | rs1127835 | C | T | PA:MYH6     | intronic  | NM_       | .           |
| ACaP13 | 14 | #### | .         | C | A | PA:RALGAPA  | splicing  | NM_NM_    | .           |
| ACaP13 | 14 | #### | .         | T | G | PA:CDC42BP  | exonic    | NM_       | mis CDC42:  |
| ACaP13 | 15 | #### | rs7146667 | T | C | PA:.        | upstream  | NR_       | .           |
| ACaP13 | 15 | #### | .         | T | C | PA:UBE3A    | exonic    | NM_       | mis UBE3A:  |
| ACaP13 | 15 | #### | .         | G | A | PA:APBA2    | intronic  | NM_       | .           |
| ACaP13 | 15 | #### | .         | G | A | PA:BUB1B    | exonic    | NM_       | mis BUB1B:  |
| ACaP13 | 15 | #### | .         | G | T | PA:.        | intergen  | NR_dist=. | .           |
| ACaP13 | 16 | #### | .         | T | C | PA:CLEC16A  | intronic  | NM_       | .           |
| ACaP13 | 16 | #### | .         | A | T | PA:XYLT1    | intronic  | NM_       | .           |

|         |    |      |           |   |   |   |            |            |           |             |
|---------|----|------|-----------|---|---|---|------------|------------|-----------|-------------|
| ACaP13  | 16 | #### | .         | C | T | . | PA:SPN     | exonic     | NM_.      | mi& SPN:NM  |
| ACaP13  | 16 | #### | rs1450253 | C | T | . | PA:ITGAX   | exonic     | NM_.      | syr ITGAX:! |
| ACaP13  | 16 | #### | .         | C | G | . | PA:SLC12A4 | exonic     | NM_.      | mi& SLC12/  |
| ACaP13  | 16 | #### | rs1135006 | G | A | . | PA:WWP2    | intronic   | NM_.      | .           |
| ACaP13  | 17 | #### | rs7673846 | G | A | . | PA:SGSM2   | exonic     | NM_.      | mi& SGSM2   |
| ACaP13  | 17 | #### | rs7606360 | C | T | . | PA:GLP2R   | exonic     | NM_.      | sto GLP2R:  |
| ACaP13  | 17 | #### | .         | G | A | . | PA:MYH13   | intronic   | NM_.      | .           |
| ACaP13  | 17 | #### | rs5549220 | G | A | . | PA:PROCA1  | intronic   | NM_.      | .           |
| ACaP13  | 17 | #### | .         | A | G | . | PA:GFAP    | intronic   | NM_.      | .           |
| ACaP13  | 17 | #### | .         | G | T | . | PA:ABCA6   | intronic   | NM_.      | .           |
| ACaP13  | 17 | #### | rs7400170 | C | T | . | PA:TBCD    | splicing   | NM_NM_.   | .           |
| ACaP13  | 18 | #### | rs7837587 | T | A | . | PA:ANKRD20 | ncRNA_NR_. | .         | .           |
| ACaP13  | 18 | #### | .         | C | G | . | PA:SLC14A1 | intronic   | NM_.      | .           |
| ACaP13  | 18 | #### | .         | G | A | . | PA:.       | upstrear   | NM_.      | .           |
| ACaP13  | 18 | #### | rs1466769 | G | A | . | PA:.       | intergen   | NM_dist=. | .           |
| ACaP13  | 18 | #### | rs5634889 | C | T | . | PA:.       | intergen   | NR_dist=. | .           |
| ACaP13  | 19 | #### | .         | C | T | . | PA:ABCA7   | exonic     | NM_.      | syr ABCA7:  |
| ACaP13  | 19 | #### | .         | G | A | . | PA:ACTL9   | exonic     | NM_.      | syr ACTL9:  |
| ACaP13  | 19 | #### | .         | A | G | . | PA:ZNF700  | intronic   | NM_.      | .           |
| ACaP13  | 19 | #### | .         | G | A | . | PA:EMR3    | intronic   | NM_.      | .           |
| ACaP13  | 19 | #### | .         | C | G | . | PA:.       | intergen   | NM_dist=. | .           |
| ACaP13  | 19 | #### | .         | G | A | . | PA:.       | upstrear   | NR_.      | .           |
| ACaP13  | 19 | #### | .         | A | C | . | PA:ZNF492  | intronic   | NM_.      | .           |
| ACaP13  | 19 | #### | .         | C | T | . | PA:NFKBID  | intronic   | NM_.      | .           |
| ACaP13  | 19 | #### | rs7125437 | C | G | . | PA:.       | intergen   | NR_dist=. | .           |
| ACaP13  | 19 | #### | rs1820521 | G | A | . | PA:SIGLEC7 | intronic   | NM_.      | .           |
| ACaP13  | 20 | #### | .         | C | T | . | PA:OXT     | exonic     | NM_.      | syr OXT:NM  |
| ACaP13  | 20 | #### | .         | G | A | . | PA:GFRA4   | exonic     | NM_.      | sto GFRA4   |
| ACaP13  | 20 | #### | .         | T | A | . | PA:PLCB1   | splicing   | NM_NM_.   | .           |
| ACaP13  | 20 | #### | .         | G | A | . | PA:GATA5   | exonic     | NM_.      | syr GATA5   |
| ACaP13  | 21 | #### | rs7964453 | C | G | . | PA:.       | intergen   | NR_dist=. | .           |
| ACaP13  | 21 | #### | rs3735529 | C | A | . | PA:.       | downstr    | NM_.      | .           |
| ACaP13  | 21 | #### | rs7280383 | T | C | . | PA:.       | intergen   | NM_dist=. | .           |
| ACaP13  | 21 | #### | .         | G | T | . | PA:NCAM2   | intronic   | NM_.      | .           |
| ACaP13  | 21 | #### | rs7738143 | C | T | . | PA:CLIC6   | exonic     | NM_.      | syr CLIC6:f |
| ACaP13  | 21 | #### | rs5510648 | C | T | . | PA:TRAPPC1 | exonic     | NM_.      | syr TRAPP   |
| ACaP13  | 21 | #### | .         | G | A | . | PA:PCBP3   | exonic     | NM_.      | mi& PCBP3:  |
| ACaP13  | 21 | #### | .         | G | A | . | PA:COL6A1  | exonic     | NM_.      | mi& COL6A   |
| ACaP13  | 22 | #### | rs1262847 | G | A | . | PA:.       | intergen   | NR_dist=. | .           |
| ACaP13  | 22 | #### | rs86008   | A | G | . | PA:.       | downstr    | NR_.      | .           |
| ACaP13  | 22 | #### | .         | C | A | . | PA:RNF215  | exonic     | NM_.      | syr RNF215  |
| ACaP13X |    | #### | .         | T | C | . | PA:CLCN4   | intronic   | NM_.      | .           |
| ACaP13X |    | #### | rs7787173 | C | T | . | PA:BEND2   | exonic     | NM_.      | mi& BEND2   |
| ACaP13X |    | #### | .         | C | T | . | PA:AKAP4   | intronic   | NM_.      | .           |
| ACaP13X |    | #### | .         | C | T | . | PA:.       | intergen   | NM_dist=. | .           |
| ACaP13X |    | #### | .         | T | C | . | PA:TEX11   | intronic   | NM_.      | .           |
| ACaP13X |    | #### | .         | C | T | . | PA:OGT     | exonic     | NM_.      | mi& OGT:NI  |
| ACaP13X |    | #### | .         | G | A | . | PA:TCEAL6  | intronic   | NM_.      | .           |
| ACaP13X |    | #### | .         | C | T | . | PA:.       | intergen   | NM_dist=. | .           |
| ACaP13X |    | #### | rs9176062 | C | T | . | PA:.       | intergen   | NM_dist=. | .           |
| ACaP13X |    | #### | rs9279180 | G | A | . | PA:.       | intergen   | NM_dist=. | .           |
| ACaP13X |    | #### | .         | C | T | . | PA:IRAK1   | exonic     | NM_.      | mi& IRAK1:f |
| ACaP14  | 1  | #### | rs3718451 | G | A | . | PA:ACTL8   | exonic     | NM_.      | syr ACTL8:  |
| ACaP14  | 1  | #### | .         | T | A | . | PA:WDTC1   | exonic     | NM_.      | sto WDTC1   |

|        |    |      |           |   |   |   |            |            |           |     |         |
|--------|----|------|-----------|---|---|---|------------|------------|-----------|-----|---------|
| ACaP14 | 1  | #### | rs7678484 | C | T | . | PA:C1orf94 | intronic   | NM_.      | .   | .       |
| ACaP14 | 1  | #### | rs7603609 | G | A | . | PA:GJA4    | exonic     | NM_.      | syr | GJA4:N  |
| ACaP14 | 1  | #### | .         | G | A | . | PA:ST3GAL3 | intronic   | NM_.      | .   | .       |
| ACaP14 | 1  | #### | .         | G | T | . | PA:TESK2   | exonic     | NM_.      | mis | TESK2:  |
| ACaP14 | 1  | #### | .         | G | C | . | PA:ROR1    | intronic   | NM_.      | .   | .       |
| ACaP14 | 1  | #### | .         | G | T | . | PA:JAK1    | intronic   | NM_.      | .   | .       |
| ACaP14 | 1  | #### | .         | G | A | . | PA:AMPD2   | exonic     | NM_.      | mis | AMPD2   |
| ACaP14 | 1  | #### | rs7547967 | T | G | . | PA:PIFO    | intronic   | NM_.      | .   | .       |
| ACaP14 | 1  | #### | rs7528408 | C | T | . | PA:.       | intergen   | NR_dist=. | .   | .       |
| ACaP14 | 1  | #### | rs2009307 | C | T | . | PA:NBP20,N | intronic   | NM_.      | .   | .       |
| ACaP14 | 1  | #### | rs3726923 | A | G | . | PA:NBP25P  | ncRNA_NR_. | .         | .   | .       |
| ACaP14 | 1  | #### | rs8799825 | G | T | . | PA:NBP25P  | ncRNA_NR_. | .         | .   | .       |
| ACaP14 | 1  | #### | .         | T | G | . | PA:PTPN7   | intronic   | NM_.      | .   | .       |
| ACaP14 | 1  | #### | rs7756172 | C | T | . | PA:OBSCN   | intronic   | NM_.      | .   | .       |
| ACaP14 | 2  | #### | rs7587514 | C | T | . | PA:TPO     | exonic     | NM_.      | mis | TPO:NM  |
| ACaP14 | 2  | #### | .         | G | A | . | PA:LRP2    | UTR5       | NM_NM_.   | .   | .       |
| ACaP14 | 2  | #### | .         | A | C | . | PA:MIR548N | ncRNA_NR_. | .         | .   | .       |
| ACaP14 | 2  | #### | rs1411611 | C | T | . | PA:STK17B  | intronic   | NM_.      | .   | .       |
| ACaP14 | 3  | #### | rs1156481 | C | T | . | PA:CELSR3  | exonic     | NM_.      | mis | CELSR   |
| ACaP14 | 3  | #### | .         | A | G | . | PA:SLC9C1  | intronic   | NM_.      | .   | .       |
| ACaP14 | 3  | #### | .         | C | A | . | PA:PCOLCE2 | intronic   | NM_.      | .   | .       |
| ACaP14 | 3  | #### | .         | C | T | . | PA:ABCC5   | exonic     | NM_.      | mis | ABCC5   |
| ACaP14 | 4  | #### | .         | T | A | . | PA:PDE6B   | exonic     | NM_.      | mis | PDE6B:  |
| ACaP14 | 4  | #### | .         | C | T | . | PA:GAK     | exonic     | NM_.      | mis | GAK:NM  |
| ACaP14 | 4  | #### | rs7307061 | T | C | . | PA:ZFYVE28 | intronic   | NM_.      | .   | .       |
| ACaP14 | 4  | #### | rs8796734 | A | G | . | PA:.       | upstream   | NM_.      | .   | .       |
| ACaP14 | 4  | #### | rs7690288 | C | G | . | PA:GRID2   | intronic   | NM_.      | .   | .       |
| ACaP14 | 4  | #### | .         | T | G | . | PA:RXFP1   | intronic   | NM_.      | .   | .       |
| ACaP14 | 4  | #### | rs1003755 | G | A | . | PA:.       | intergen   | NM_dist=. | .   | .       |
| ACaP14 | 5  | #### | .         | G | C | . | PA:SEMA5A  | intronic   | NM_.      | .   | .       |
| ACaP14 | 5  | #### | .         | G | A | . | PA:RASGRF2 | exonic     | NM_.      | syr | RASGR   |
| ACaP14 | 5  | #### | .         | G | A | . | PA:APC     | exonic     | NM_.      | mis | APC:NM  |
| ACaP14 | 5  | #### | .         | G | C | . | PA:PCDHGB8 | ncRNA_NR_. | .         | .   | .       |
| ACaP14 | 5  | #### | .         | C | A | . | PA:EBF1    | intronic   | NM_.      | .   | .       |
| ACaP14 | 5  | #### | .         | T | A | . | PA:WWC1    | exonic     | NM_.      | syr | WWC1:   |
| ACaP14 | 6  | #### | .         | G | T | . | PA:ZSCAN31 | exonic     | NM_.      | mis | ZSCAN   |
| ACaP14 | 6  | #### | rs7589117 | C | T | . | PA:POU5F1  | exonic     | NM_.      | mis | POU5F   |
| ACaP14 | 6  | #### | .         | T | A | . | PA:PRIM2   | intronic   | NM_.      | .   | .       |
| ACaP14 | 6  | #### | .         | G | A | . | PA:TBX18   | exonic     | NM_.      | mis | TBX18:  |
| ACaP14 | 6  | #### | rs441907  | T | C | . | PA:.       | intergen   | NM_dist=. | .   | .       |
| ACaP14 | 7  | #### | .         | C | G | . | PA:SEMA3A  | intronic   | NM_.      | .   | .       |
| ACaP14 | 7  | #### | .         | G | C | . | PA:CALCR   | intronic   | NM_.      | .   | .       |
| ACaP14 | 7  | #### | .         | C | T | . | PA:C7orf60 | exonic     | NM_.      | syr | C7orf60 |
| ACaP14 | 8  | #### | .         | A | T | . | PA:ZNF705G | exonic     | NM_.      | mis | ZNF705  |
| ACaP14 | 8  | #### | .         | T | C | . | PA:CSMD3   | exonic     | NM_.      | mis | CSMD3   |
| ACaP14 | 8  | #### | .         | T | C | . | PA:NDRG1   | intronic   | NM_.      | .   | .       |
| ACaP14 | 9  | #### | .         | G | A | . | PA:NFIB    | exonic     | NM_.      | sto | NFIB:NI |
| ACaP14 | 9  | #### | .         | C | T | . | PA:FKTN    | exonic     | NM_.      | sto | FKTN:N  |
| ACaP14 | 9  | #### | .         | C | T | . | PA:OR1L6   | exonic     | NM_.      | syr | OR1L6:  |
| ACaP14 | 10 | #### | .         | A | C | . | PA:SVIL    | intronic   | NM_.      | .   | .       |
| ACaP14 | 10 | #### | rs3125109 | G | A | . | PA:.       | intergen   | NR_dist=. | .   | .       |
| ACaP14 | 10 | #### | .         | G | A | . | PA:TBATA   | UTR3       | NM_NM_.   | .   | .       |
| ACaP14 | 10 | #### | rs7905448 | T | A | . | PA:MCU     | intronic   | NM_.      | .   | .       |
| ACaP14 | 10 | #### | .         | C | A | . | PA:ANKRD1  | intronic   | NM_.      | .   | .       |

|          |    |      |           |   |   |   |             |           |           |     |         |
|----------|----|------|-----------|---|---|---|-------------|-----------|-----------|-----|---------|
| ACaP14   | 10 | #### | rs7646688 | A | G | . | PA:MXI1     | exonic    | NM_       | mi  | MXI1:N  |
| ACaP14   | 10 | #### | .         | G | A | . | PA:ATRNL1   | intronic  | NM_       | .   | .       |
| ACaP14   | 11 | #### | .         | C | T | . | PA:DNHD1    | exonic    | NM_       | mi  | DNHD1   |
| ACaP14   | 11 | #### | .         | C | A | . | PA:.        | intergen  | NM_dist=  | .   | .       |
| ACaP14   | 11 | #### | rs3775202 | C | T | . | PA:B3GNT6   | exonic    | NM_       | unl | UNKNC   |
| ACaP14   | 11 | #### | .         | C | T | . | PA:TRIM64   | exonic    | NM_       | syr | TRIM64  |
| ACaP14   | 11 | #### | rs7690752 | G | A | . | PA:.        | intergen  | NM_dist=  | .   | .       |
| ACaP14   | 11 | #### | rs7585846 | G | A | . | PA:SIDT2    | exonic    | NM_       | mi  | SIDT2:1 |
| ACaP14   | 12 | #### | .         | C | T | . | PA:ITPR2    | exonic    | NM_       | syr | ITPR2:1 |
| ACaP14   | 12 | #### | .         | T | G | . | PA:DDN      | exonic    | NM_       | mi  | DDN:NI  |
| ACaP14   | 12 | #### | .         | A | G | . | PA:PPP1R1A  | intronic  | NM_       | .   | .       |
| ACaP14   | 13 | #### | .         | C | T | . | PA:CDX2     | exonic    | NM_       | mi  | CDX2:N  |
| ACaP14   | 14 | #### | rs2259899 | C | A | . | PA:.        | intergen  | NR_dist=  | .   | .       |
| ACaP14   | 14 | #### | rs2014187 | G | T | . | PA:.        | intergen  | NM_dist=  | .   | .       |
| ACaP14   | 14 | #### | .         | G | A | . | PA:ZFP36L1  | exonic    | NM_       | mi  | ZFP36L  |
| ACaP14   | 15 | #### | .         | C | G | . | PA:UNC13C   | exonic    | NM_       | mi  | UNC13C  |
| ACaP14   | 16 | #### | rs7764738 | C | T | . | PA:CACNA1F  | exonic    | NM_       | mi  | CACNA   |
| ACaP14   | 16 | #### | .         | G | C | . | PA:ERN2     | intronic  | NM_       | .   | .       |
| ACaP14   | 16 | #### | rs2013540 | C | A | . | PA:.        | intergen  | NR_dist=  | .   | .       |
| ACaP14   | 18 | #### | rs7502623 | A | C | . | PA:.        | intergen  | NM_dist=  | .   | .       |
| ACaP14   | 19 | #### | rs7589667 | C | T | . | PA:EMR4P    | ncRNA_NR_ | .         | .   | .       |
| ACaP14   | 19 | #### | .         | C | A | . | PA:COL5A3   | exonic    | NM_       | mi  | COL5A:  |
| ACaP14   | 19 | #### | .         | A | T | . | PA:MIA-RAB4 | ncRNA_NR_ | .         | .   | .       |
| ACaP14   | 19 | #### | .         | G | T | . | PA:CCDC61   | intronic  | NM_       | .   | .       |
| ACaP14   | 19 | #### | .         | G | A | . | PA:HIF3A    | intronic  | NM_       | .   | .       |
| ACaP14   | 19 | #### | rs9019919 | G | A | . | PA:SBK3     | exonic    | NM_       | mi  | SBK3:N  |
| ACaP14   | 20 | #### | .         | C | G | . | PA:ANKEF1   | exonic    | NM_       | mi  | ANKEF   |
| ACaP14   | 20 | #### | rs7770803 | G | C | . | PA:ANKEF1   | exonic    | NM_       | mi  | ANKEF   |
| ACaP14   | 20 | #### | rs7792821 | C | T | . | PA:AAR2     | exonic    | NM_       | mi  | AAR2:N  |
| ACaP14   | 21 | #### | .         | G | A | . | PA:DONSON   | exonic    | NM_       | mi  | DONSC   |
| ACaP14   | 22 | #### | .         | C | T | . | PA:TBC1D10  | exonic    | NM_       | mi  | TBC1D   |
| ACaP14X  |    | #### | .         | G | A | . | PA:EIF1AX   | intronic  | NM_       | .   | .       |
| ACaP14X  |    | #### | .         | G | T | . | PA:.        | intergen  | NM_dist=  | .   | .       |
| ACaP14X  |    | #### | .         | C | T | . | PA:ARAF     | exonic    | NM_       | syr | ARAF:N  |
| ACaP14X  |    | #### | .         | C | A | . | PA:PHF8     | intronic  | NM_       | .   | .       |
| ACaP14X  |    | #### | .         | C | G | . | PA:BEX1     | intronic  | NM_       | .   | .       |
| ACaP14X  |    | #### | .         | C | T | . | PA:TSC22D3  | UTR5      | NM_NM_    | .   | .       |
| ACaP14X  |    | #### | .         | G | C | . | PA:DDX26B   | intronic  | NM_       | .   | .       |
| ACaP14X  |    | #### | .         | C | T | . | PA:ZIC3     | exonic    | NM_       | syr | ZIC3:NI |
| ACaP14X  |    | #### | .         | A | G | . | PA:F8       | intronic  | NM_       | .   | .       |
| ACaP14X  |    | #### | rs4013617 | G | A | . | PA:.        | intergen  | NM_dist=  | .   | .       |
| ACaP14MT |    | #### | .         | G | A | . | PA:.        | intergen  | NOI_dist= | .   | .       |



| Gene  | cytoBand | target | tfbs | gen | Repeat    | avsnr          | cosmic82 | cli | gwas( | 1000g2( | 1000g2( | 1000g2( |
|-------|----------|--------|------|-----|-----------|----------------|----------|-----|-------|---------|---------|---------|
| ENST0 | 1p36.33  | .      | .    | Sc  | .         | rs626          | .        | .   | .     | .       | .       | .       |
| ENST0 | 1p36.33  | .      | .    | Sc  | .         | rs879 ID=COSN2 | .        | .   | .     | .       | .       | .       |
| ENST0 | 1p36.33  | .      | .    | .   | .         | .              | .        | .   | .     | .       | .       | .       |
| ENST0 | 1p36.23  | .      | .    | .   | Score=273 | rs201          | .        | .   | .     | .       | .       | .       |
| ENST0 | 1p36.22  | .      | Sc   | .   | .         | rs770 ID=COSM1 | .        | .   | .     | .       | .       | .       |
| ENST0 | 1p36.22  | .      | .    | .   | .         | .              | .        | .   | .     | .       | .       | .       |
| ENST0 | 1p36.21  | .      | .    | Sc  | .         | rs757 ID=COSN1 | .        | .   | .     | .       | .       | .       |
| ENST0 | 1p36.13  | .      | .    | Sc  | .         | .              | .        | .   | .     | .       | .       | .       |
| ENST0 | 1p36.13  | .      | .    | Sc  | .         | rs643          | .        | .   | .     | .       | .       | .       |
| .     | 1p36.13  | .      | .    | Sc  | .         | rs189 ID=COSN2 | .        | .   | .     | .       | .       | .       |
| ENST0 | 1p36.13  | .      | .    | .   | Score=981 | rs796 ID=COSN2 | .        | .   | .     | .       | .       | .       |
| ENST0 | 1p35.3   | .      | .    | .   | .         | .              | .        | .   | .     | .       | .       | .       |
| ENST0 | 1p34.3   | .      | .    | .   | .         | rs369          | .        | .   | .     | .       | .       | .       |
| ENST0 | 1p32.2   | .      | .    | .   | .         | .              | .        | .   | .     | .       | .       | .       |
| ENST0 | 1p32.1   | .      | .    | .   | .         | .              | .        | .   | .     | .       | .       | .       |
| ENST0 | 1p13.3   | .      | Sc   | .   | .         | .              | .        | .   | .     | .       | .       | .       |
| .     | 1p11.2   | .      | .    | .   | Score=140 | .              | .        | .   | .     | .       | .       | .       |
| ENST0 | 1q21.1   | .      | .    | Sc  | .         | rs180 ID=COSN1 | .        | .   | .     | .       | .       | .       |
| .     | 1q21.1   | .      | .    | Sc  | .         | rs374          | .        | .   | .     | .       | .       | .       |
| ENST0 | 1q21.1   | .      | .    | Sc  | Score=190 | rs140          | .        | .   | .     | .       | .       | .       |
| ENST0 | 1q21.1   | .      | .    | Sc  | .         | rs796 ID=COSN1 | .        | .   | .     | .       | .       | .       |
| ENST0 | 1q21.1   | .      | .    | Sc  | .         | rs776 ID=COSN1 | .        | .   | .     | .       | .       | .       |
| .     | 1q21.1   | .      | .    | Sc  | .         | .              | .        | .   | .     | .       | .       | .       |
| ENST0 | 1q21.1   | .      | .    | Sc  | .         | rs169          | .        | .   | .     | .       | .       | .       |
| ENST0 | 1q21.1   | .      | .    | Sc  | .         | rs112 ID=COSN2 | .        | .   | .     | .       | .       | .       |
| .     | 1q21.1   | .      | .    | Sc  | Score=664 | rs373          | .        | .   | .     | 0.023   | 0.005   | .       |
| ENST0 | 1q21.1   | .      | Sc   | Sc  | .         | .              | .        | .   | .     | .       | .       | .       |
| ENST0 | 1q21.1   | .      | .    | Sc  | Score=636 | rs269          | .        | .   | .     | .       | .       | .       |
| ENST0 | 1q21.1   | .      | .    | Sc  | .         | .              | .        | .   | .     | .       | .       | .       |
| ENST0 | 1q21.1   | .      | .    | Sc  | .         | ID=COSN2       | .        | .   | .     | .       | .       | .       |
| ENST0 | 1q21.1   | .      | .    | Sc  | .         | ID=COSN1       | .        | .   | .     | .       | .       | .       |
| ENST0 | 1q21.1   | .      | .    | .   | .         | rs193          | .        | .   | .     | .       | .       | .       |
| ENST0 | 1q21.2   | .      | .    | Sc  | .         | .              | .        | .   | .     | .       | .       | .       |
| ENST0 | 1q21.2   | .      | .    | Sc  | .         | rs283 ID=COSN1 | .        | .   | .     | .       | .       | .       |
| ENST0 | 1q21.2   | .      | .    | Sc  | .         | rs298 ID=COSN2 | .        | .   | .     | 0.002   | 0.014   | .       |
| ENST0 | 1q21.3   | .      | .    | .   | .         | rs374 ID=COSM1 | .        | .   | .     | .       | .       | .       |
| ENST0 | 1q23.3   | .      | .    | Sc  | Score=180 | rs167 ID=COSN1 | .        | .   | .     | 0.672   | 0.759   | .       |
| ENST0 | 1q23.3   | .      | .    | Sc  | .         | rs148          | .        | .   | .     | .       | .       | .       |
| ENST0 | 1q24.2   | .      | Sc   | .   | .         | rs759          | .        | .   | .     | .       | .       | .       |
| ENST0 | 1q32.2   | .      | .    | .   | .         | .              | .        | .   | .     | .       | .       | .       |
| ENST0 | 1q42.12  | .      | .    | .   | Score=160 | .              | .        | .   | .     | .       | .       | .       |
| ENST0 | 1q43     | .      | .    | .   | .         | .              | .        | .   | .     | .       | .       | .       |
| ENST0 | 1q43     | .      | Sc   | Sc  | .         | rs200 ID=COSM1 | .        | .   | .     | .       | .       | .       |
| .     | 1q44     | .      | .    | Sc  | .         | rs373 ID=COSN1 | .        | .   | .     | .       | .       | .       |
| .     | 1q44     | .      | .    | Sc  | .         | rs178 ID=COSN1 | .        | .   | .     | .       | .       | .       |
| .     | 2p11.2   | .      | .    | .   | Score=240 | rs346 ID=COSN1 | .        | .   | .     | 0.005   | 0.066   | .       |
| .     | 2p11.1   | .      | .    | Sc  | Score=231 | rs868 ID=COSN1 | .        | .   | .     | .       | .       | .       |
| ENST0 | 2p11.1   | .      | .    | Sc  | Score=157 | .              | .        | .   | .     | .       | .       | .       |
| ENST0 | 2q12.1   | .      | .    | .   | .         | .              | .        | .   | .     | .       | .       | .       |
| ENST0 | 2q13     | .      | .    | Sc  | Score=335 | rs387 ID=COSN1 | .        | .   | .     | .       | .       | .       |
| ENST0 | 2q14.3   | .      | .    | .   | Score=130 | rs103          | .        | .   | .     | .       | .       | .       |



|        |          |   |   |       |                           |   |   |   |             |
|--------|----------|---|---|-------|---------------------------|---|---|---|-------------|
| ENST0. | 6q24.3   | . | . | .     | rs774.                    | . | . | . | 0.038       |
| ENST0. | 6q25.1   | . | . | Sc    | Score=169 rs146 ID=COSN2. | . | . | . | .           |
| ENST0. | 7p22.3   | . | . | .     | .                         | . | . | . | .           |
| ENST0. | 7p21.1   | . | . | .     | Score=685 rs730 ID=COSN1. | . | . | . | 4E-04       |
| ENST0. | 7p13     | . | . | .     | .                         | . | . | . | .           |
| .      | 7p11.2   | . | . | Sc    | .                         | . | . | . | .           |
| ENST0. | 7p11.2   | . | . | Sc    | rs791.                    | . | . | . | 0.091 0.125 |
| ENST0. | 7p11.2   | . | . | Sc    | ID=COSN2.                 | . | . | . | 0.045 0.016 |
| ENST0. | 7p11.2   | . | . | Sc    | .                         | . | . | . | .           |
| ENST0. | 7p11.2   | . | . | Sc    | .                         | . | . | . | .           |
| .      | 7q11.21  | . | . | .     | Score=133 rs431 ID=COSN1. | . | . | . | .           |
| ENST0. | 7q11.21  | . | . | Sc    | .                         | . | . | . | .           |
| ENST0. | 7q11.21  | . | . | Sc    | .                         | . | . | . | .           |
| .      | 7q11.21  | . | . | Sc    | rs546.                    | . | . | . | 0.022 0.098 |
| .      | 7q11.21  | . | . | Sc    | ID=COSN2.                 | . | . | . | .           |
| .      | 7q11.21  | . | . | Sc    | rs868 ID=COSN2.           | . | . | . | .           |
| ENST0. | 7q11.23  | . | . | Sc    | Score=204 rs879 ID=COSN2. | . | . | . | .           |
| ENST0. | 7q21.3   | . | . | .     | rs768.                    | . | . | . | .           |
| ENST0. | 7q22.1   | . | . | Sc    | rs372 ID=COSN1.           | . | . | . | .           |
| ENST0. | 7q31.33  | . | . | Sc    | rs780.                    | . | . | . | .           |
| ENST0. | 7q32.2   | . | . | .     | ID=COSM1.                 | . | . | . | .           |
| ENST0. | 7q36.1   | . | . | Sc    | rs775 ID=COSM1.           | . | . | . | .           |
| ENST0. | 7q36.1   | . | . | Sc Sc | rs149 ID=COSM1.           | . | . | . | .           |
| ENST0. | 7q36.1   | . | . | Sc    | Score=231.                | . | . | . | .           |
| .      | 7q36.3   | . | . | .     | Score=955 rs140 ID=COSN2. | . | . | . | .           |
| .      | 7q36.3   | . | . | .     | Score=955 rs148 ID=COSN2. | . | . | . | .           |
| ENST0. | 8p23.1   | . | . | Sc    | .                         | . | . | . | .           |
| ENST0. | 8p22     | . | . | .     | .                         | . | . | . | .           |
| ENST0. | 8p21.3   | . | . | .     | .                         | . | . | . | .           |
| ENST0. | 8p21.2   | . | . | Sc    | .                         | . | . | . | .           |
| .      | 8p11.21  | . | . | .     | Score=488 rs181.          | . | . | . | 4E-04       |
| .      | 8p11.1   | . | . | .     | Score=126 rs202 ID=COSN2. | . | . | . | .           |
| ENST0. | 8q13.3   | . | . | .     | .                         | . | . | . | .           |
| ENST0. | 8q21.13  | . | . | .     | rs183 ID=COSM1.           | . | . | . | 0.001       |
| ENST0. | 9p13.1   | . | . | Sc    | rs132 ID=COSN1.           | . | . | . | .           |
| ENST0. | 9q12     | . | . | Sc    | rs295.                    | . | . | . | .           |
| .      | 9q13     | . | . | Sc    | rs196.                    | . | . | . | .           |
| .      | 9q13     | . | . | Sc    | rs201 ID=COSN2.           | . | . | . | .           |
| .      | 9q13     | . | . | Sc    | Score=540 rs492.          | . | . | . | .           |
| ENST0. | 9q22.31  | . | . | .     | .                         | . | . | . | .           |
| .      | 9q32     | . | . | Sc    | rs286.                    | . | . | . | .           |
| ENST0. | 9q34.11  | . | . | .     | .                         | . | . | . | .           |
| ENST0. | 9q34.11  | . | . | .     | .                         | . | . | . | .           |
| ENST0. | 9q34.2   | . | . | .     | .                         | . | . | . | .           |
| ENST0. | 9q34.2   | . | . | .     | rs769.                    | . | . | . | .           |
| ENST0. | 10p13    | . | . | .     | .                         | . | . | . | .           |
| ENST0. | 10p13    | . | . | .     | Score=288 rs105.          | . | . | . | .           |
| ENST0. | 10p12.1  | . | . | .     | ID=COSM1.                 | . | . | . | .           |
| ENST0. | 10p12.1  | . | . | Sc    | .                         | . | . | . | .           |
| ENST0. | 10p12.1  | . | . | Sc    | rs753 ID=COSM1.           | . | . | . | .           |
| ENST0. | 10p11.23 | . | . | .     | rs556.                    | . | . | . | .           |
| ENST0. | 10p11.21 | . | . | Sc    | rs175 ID=COSN2.           | . | . | . | .           |
| .      | 10p11.1  | . | . | Sc    | .                         | . | . | . | .           |
| ENST0. | 10p11.1  | . | . | Sc    | rs149 ID=COSN2.           | . | . | . | .           |

|        |          |   |     |                           |   |   |       |       |
|--------|----------|---|-----|---------------------------|---|---|-------|-------|
| ENST0. | 10p11.1  | . | Sc. | rs552.                    | . | . | 0.001 | 2E-04 |
| ENST0. | 10q11.22 | . | Sc. | rs782 ID=COSN2.           | . | . | .     | .     |
| ENST0. | 10q11.22 | . | .   | rs782.                    | . | . | .     | .     |
| ENST0. | 10q21.2  | . | .   | .                         | . | . | .     | .     |
| ENST0. | 10q21.3  | . | .   | .                         | . | . | .     | .     |
| ENST0. | 10q21.3  | . | .   | rs181 ID=COSM4.           | . | . | .     | 2E-04 |
| ENST0. | 10q22.1  | . | .   | rs185.                    | . | . | .     | 2E-04 |
| ENST0. | 10q22.2  | . | Sc. | .                         | . | . | .     | .     |
| ENST0. | 10q23.31 | . | Sc. | .                         | . | . | .     | .     |
| ENST0. | 10q24.1  | . | .   | rs900 ID=COSN2.           | . | . | .     | .     |
| ENST0. | 10q25.1  | . | .   | Score=963.                | . | . | .     | .     |
| ENST0. | 10q25.3  | . | .   | rs102.                    | . | . | .     | .     |
| ENST0. | 11p15.4  | . | .   | .                         | . | . | .     | .     |
| ENST0. | 11p14.1  | . | .   | Score=228 rs761 ID=COSN2. | . | . | .     | .     |
| ENST0. | 11p12    | . | .   | Score=299.                | . | . | .     | .     |
| .      | 11p11.12 | . | Sc. | .                         | . | . | .     | .     |
| ENST0. | 11q12.2  | . | .   | .                         | . | . | .     | .     |
| ENST0. | 11q13.5  | . | Sc. | ID=COSM2.                 | . | . | .     | .     |
| ENST0. | 11q14.1  | . | Sc. | .                         | . | . | .     | .     |
| ENST0. | 11q14.1  | . | Sc. | .                         | . | . | .     | .     |
| ENST0. | 11q14.1  | . | .   | rs761.                    | . | . | .     | .     |
| ENST0. | 11q21    | . | Sc. | rs143 ID=COSM4.           | . | . | .     | 0.001 |
| ENST0. | 11q23.1  | . | .   | .                         | . | . | .     | .     |
| ENST0. | 11q24.1  | . | .   | rs775 ID=COSM4.           | . | . | .     | .     |
| ENST0. | 11q24.2  | . | .   | rs251.                    | . | . | 0.164 | 0.155 |
| ENST0. | 12p13.33 | . | Sc. | rs538 ID=COSN1.           | . | . | 0.375 | 0.205 |
| ENST0. | 12p13.33 | . | Sc. | rs879.                    | . | . | .     | .     |
| ENST0. | 12p13.33 | . | .   | .                         | . | . | .     | .     |
| ENST0. | 12p13.33 | . | .   | Score=286 rs868 ID=COSN1. | . | . | .     | .     |
| ENST0. | 12p11.21 | . | Sc. | rs257.                    | . | . | .     | .     |
| ENST0. | 12q12    | . | .   | .                         | . | . | .     | .     |
| ENST0. | 12q13.11 | . | .   | Score=333.                | . | . | .     | .     |
| ENST0. | 12q13.13 | . | .   | .                         | . | . | .     | .     |
| ENST0. | 12q15    | . | Sc. | .                         | . | . | .     | .     |
| ENST0. | 12q21.2  | . | Sc. | .                         | . | . | .     | .     |
| ENST0. | 12q23.3  | . | Sc. | rs104 ID=COSM4.           | . | . | .     | .     |
| ENST0. | 12q24.11 | . | .   | Score=256.                | . | . | .     | .     |
| ENST0. | 12q24.23 | . | .   | .                         | . | . | .     | .     |
| ENST0. | 13q21.1  | . | .   | .                         | . | . | .     | .     |
| ENST0. | 14q11.2  | . | Sc. | ID=COSN2.                 | . | . | .     | .     |
| ENST0. | 14q11.2  | . | Sc. | rs201 ID=COSN1.           | . | . | .     | .     |
| .      | 14q11.2  | . | Sc. | rs879 ID=COSN1.           | . | . | .     | .     |
| ENST0. | 14q11.2  | . | Sc. | .                         | . | . | .     | .     |
| ENST0. | 14q11.2  | . | Sc. | rs867.                    | . | . | .     | .     |
| ENST0. | 14q11.2  | . | Sc. | .                         | . | . | .     | .     |
| .      | 14q11.2  | . | .   | .                         | . | . | .     | .     |
| ENST0. | 14q21.1  | . | .   | .                         | . | . | .     | .     |
| .      | 14q22.1  | . | .   | .                         | . | . | .     | .     |
| ENST0. | 14q23.1  | . | .   | .                         | . | . | .     | .     |
| ENST0. | 14q23.2  | . | .   | rs773 ID=COSM4.           | . | . | .     | .     |
| ENST0. | 14q32.2  | . | Sc. | .                         | . | . | .     | .     |
| .      | 14q32.33 | . | Sc  | Score=142 rs289.          | . | . | .     | .     |
| ENST0. | 14q32.33 | . | Sc. | rs368 ID=COSN1.           | . | . | .     | .     |

|        |          |   |     |                           |   |   |       |       |
|--------|----------|---|-----|---------------------------|---|---|-------|-------|
| .      | 14q32.33 | . | Sc. | rs619 ID=COSN1.           | . | . | .     | .     |
| ENST0. | 15q11.1  | . | Sc. | .                         | . | . | .     | .     |
| ENST0. | 15q11.1  | . | Sc  | Score=182.                | . | . | .     | .     |
| .      | 15q11.2  | . | Sc. | rs374 ID=COSN2.           | . | . | .     | .     |
| ENST0. | 15q11.2  | . | Sc. | .                         | . | . | .     | .     |
| ENST0. | 15q11.2  | . | Sc. | .                         | . | . | .     | .     |
| ENST0. | 15q11.2  | . | Sc. | ID=COSN2.                 | . | . | .     | .     |
| .      | 15q11.2  | . | Sc. | rs796.                    | . | . | .     | .     |
| .      | 15q11.2  | . | Sc. | .                         | . | . | .     | .     |
| .      | 15q11.2  | . | Sc. | rs712.                    | . | . | 0.384 | 0.379 |
| ENST0. | 15q11.2  | . | .   | ID=COSM1.                 | . | . | .     | .     |
| ENST0. | 15q12    | . | Sc. | .                         | . | . | .     | .     |
| ENST0. | 15q13.1  | . | Sc. | rs769 ID=COSN1.           | . | . | .     | .     |
| ENST0. | 15q13.1  | . | Sc. | .                         | . | . | .     | .     |
| ENST0. | 15q13.2  | . | Sc. | ID=COSN2.                 | . | . | .     | .     |
| ENST0. | 15q13.2  | . | Sc. | .                         | . | . | .     | .     |
| ENST0. | 15q13.3  | . | Sc. | rs865.                    | . | . | .     | .     |
| ENST0. | 15q13.3  | . | Sc. | .                         | . | . | .     | .     |
| ENST0. | 15q15.1  | . | .   | Score=372 rs368 ID=COSN2. | . | . | .     | .     |
| ENST0. | 15q22.2  | . | .   | rs374.                    | . | . | .     | .     |
| ENST0. | 15q25.1  | . | Sc. | .                         | . | . | .     | .     |
| ENST0. | 15q25.2  | . | Sc. | rs574.                    | . | . | 0.002 | 4E-04 |
| ENST0. | 15q25.2  | . | Sc. | rs199 ID=COSM1.           | . | . | .     | .     |
| ENST0. | 15q25.2  | . | Sc. | rs377 ID=COSM1.           | . | . | .     | .     |
| ENST0. | 15q26.3  | . | Sc. | rs620 ID=COSN2.           | . | . | .     | .     |
| ENST0. | 16p13.3  | . | .   | rs756.                    | . | . | .     | .     |
| ENST0. | 16p12.2  | . | .   | Score=426. ID=COSN1.      | . | . | .     | .     |
| ENST0. | 16p11.2  | . | Sc. | rs746.                    | . | . | .     | .     |
| ENST0. | 16p11.2  | . | .   | .                         | . | . | .     | .     |
| ENST0. | 16p11.2  | . | Sc. | rs201 ID=COSN2.           | . | . | .     | 8E-04 |
| .      | 16q11.2  | . | .   | Score=108 rs464.          | . | . | .     | .     |
| .      | 16q11.2  | . | .   | Score=117 rs453.          | . | . | .     | .     |
| .      | 16q11.2  | . | .   | Score=956 rs212.          | . | . | .     | .     |
| .      | 16q11.2  | . | .   | Score=111 rs288.          | . | . | .     | .     |
| .      | 16q11.2  | . | .   | Score=114 rs435.          | . | . | .     | .     |
| .      | 16q11.2  | . | .   | Score=114 rs424.          | . | . | .     | .     |
| .      | 16q11.2  | . | .   | Score=989 rs423 ID=COSN2. | . | . | .     | .     |
| .      | 16q11.2  | . | .   | Score=111 rs797.          | . | . | .     | .     |
| .      | 16q11.2  | . | .   | Score=111 rs148.          | . | . | .     | .     |
| .      | 16q11.2  | . | .   | Score=111 rs997.          | . | . | .     | .     |
| .      | 16q11.2  | . | .   | Score=111 rs287.          | . | . | .     | .     |
| .      | 16q11.2  | . | .   | Score=111 rs424.          | . | . | .     | .     |
| .      | 16q11.2  | . | .   | Score=112 rs425.          | . | . | .     | .     |
| .      | 16q11.2  | . | .   | Score=989 rs719.          | . | . | .     | .     |
| .      | 16q11.2  | . | .   | Score=114 rs444.          | . | . | .     | .     |
| .      | 16q11.2  | . | .   | Score=114 rs445 ID=COSN1. | . | . | .     | .     |
| .      | 16q11.2  | . | .   | Score=979.                | . | . | .     | .     |
| .      | 16q11.2  | . | .   | Score=979 rs805.          | . | . | .     | .     |
| .      | 16q11.2  | . | .   | Score=112 rs805 ID=COSN1. | . | . | .     | .     |
| .      | 16q11.2  | . | .   | Score=112 rs615.          | . | . | .     | .     |
| .      | 16q11.2  | . | .   | Score=112 rs288.          | . | . | .     | .     |
| ENST0. | 16q12.2  | . | .   | .                         | . | . | .     | .     |
| ENST0. | 16q22.1  | . | Sc. | ID=COSM1.                 | . | . | .     | .     |
| .      | 16q22.1  | . | .   | Score=136. ID=COSN2.      | . | . | .     | .     |



|        |          |   |     |                           |   |   |       |       |
|--------|----------|---|-----|---------------------------|---|---|-------|-------|
| ENST0. | 22q13.2  | . | Sc. | rs142.                    | . | . | 0.006 | 0.031 |
| ENST0. | 22q13.31 | . | .   | rs105.                    | . | . | .     | .     |
| ENST0. | 22q13.31 | . | .   | .                         | . | . | .     | .     |
| ENST0. | Xp22.31  | . | Sc. | rs766.                    | . | . | .     | .     |
| ENST0. | Xp22.31  | . | Sc. | .                         | . | . | .     | .     |
| .      | Xp21.3   | . | .   | Score=114.                | . | . | .     | .     |
| ENST0. | Xp11.23  | . | .   | .                         | . | . | .     | .     |
| ENST0. | Xp11.23  | . | .   | .                         | . | . | .     | .     |
| ENST0. | Xp11.23  | . | .   | .                         | . | . | .     | .     |
| .      | Xp11.22  | . | Sc. | rs782.                    | . | . | .     | .     |
| ENST0. | Xp11.22  | . | .   | rs782.                    | . | . | .     | .     |
| .      | Xq11.1   | . | .   | Score=120.                | . | . | .     | .     |
| ENST0. | Xq12     | . | .   | .                         | . | . | .     | .     |
| ENST0. | Xq21.1   | . | .   | .                         | . | . | .     | .     |
| ENST0. | Xq21.1   | . | .   | .                         | . | . | .     | .     |
| ENST0. | Xq21.32  | . | Sc. | .                         | . | . | .     | .     |
| ENST0. | Xq22.1   | . | .   | .                         | . | . | .     | .     |
| ENST0. | Xq22.2   | . | .   | rs781.                    | . | . | .     | .     |
| ENST0. | Xq26.2   | . | Sc. | ID=COSM4.                 | . | . | .     | .     |
| ENST0. | Xq27.1   | . | Sc. | .                         | . | . | .     | .     |
| ENST0. | Xq28     | . | .   | .                         | . | . | .     | .     |
| .      | .        | . | .   | rs878 ID=COSM4.           | . | . | .     | .     |
| ENST0. | 1p36.22  | . | .   | .                         | . | . | .     | .     |
| ENST0. | 1p36.22  | . | Sc. | .                         | . | . | .     | .     |
| ENST0. | 1p36.21  | . | Sc. | rs550 ID=COSN1.           | . | . | 0.003 | 0.002 |
| ENST0. | 1p36.21  | . | Sc. | rs299.                    | . | . | .     | .     |
| ENST0. | 1p36.21  | . | Sc. | ID=COSN1.                 | . | . | .     | .     |
| ENST0. | 1p36.13  | . | Sc. | rs139 ID=COSN1.           | . | . | 0.158 | 0.034 |
| ENST0. | 1p36.12  | . | .   | .                         | . | . | .     | .     |
| ENST0. | 1p32.3   | . | .   | rs368.                    | . | . | .     | 4E-04 |
| ENST0. | 1p31.1   | . | .   | .                         | . | . | .     | .     |
| ENST0. | 1p22.2   | . | .   | .                         | . | . | .     | .     |
| ENST0. | 1p13.3   | . | .   | .                         | . | . | .     | .     |
| .      | 1q12     | . | .   | Score=545 rs201 ID=COSN1. | . | . | 0.217 | 0.248 |
| .      | 1q21.1   | . | Sc  | Score=308.                | . | . | .     | .     |
| ENST0. | 1q21.1   | . | Sc. | rs201.                    | . | . | .     | .     |
| ENST0. | 1q21.1   | . | Sc. | rs372.                    | . | . | .     | .     |
| ENST0. | 1q21.1   | . | Sc. | .                         | . | . | .     | .     |
| .      | 1q21.1   | . | Sc. | rs377.                    | . | . | .     | .     |
| ENST0. | 1q21.1   | . | Sc. | rs879.                    | . | . | .     | .     |
| ENST0. | 1q21.1   | . | Sc. | .                         | . | . | .     | .     |
| ENST0. | 1q21.1   | . | Sc. | .                         | . | . | .     | .     |
| ENST0. | 1q21.1   | . | Sc  | Score=277 rs464.          | . | . | .     | .     |
| ENST0. | 1q21.1   | . | Sc. | rs879.                    | . | . | .     | .     |
| ENST0. | 1q21.1   | . | Sc. | rs766 ID=COSN2.           | . | . | .     | .     |
| ENST0. | 1q21.1   | . | Sc. | rs782.                    | . | . | .     | .     |
| ENST0. | 1q21.2   | . | Sc. | .                         | . | . | .     | .     |
| ENST0. | 1q21.2   | . | Sc. | rs200 ID=COSN1.           | . | . | .     | .     |
| .      | 1q21.2   | . | Sc. | rs618 ID=COSN1.           | . | . | .     | .     |
| .      | 1q21.2   | . | Sc  | Score=222 rs618.          | . | . | .     | .     |
| ENST0. | 1q25.1   | . | .   | .                         | . | . | .     | .     |
| ENST0. | 1q25.1   | . | .   | rs749 ID=COSM4.           | . | . | .     | .     |
| ENST0. | 1q25.2   | . | .   | .                         | . | . | .     | .     |
| ENST0. | 1q25.2   | . | .   | rs879.                    | . | . | .     | .     |

|        |         |   |   |    |            |           |              |   |   |             |
|--------|---------|---|---|----|------------|-----------|--------------|---|---|-------------|
| ENST0. | 1q41    | . | . | .  | .          | .         | .            | . | . | .           |
| ENST0. | 1q42.13 | . | . | Sc | Score=498. | .         | .            | . | . | .           |
| .      | 1q42.13 | . | . | Sc | .          | .         | .            | . | . | .           |
| ENST0. | 1q43    | . | . | .  | .          | .         | .            | . | . | .           |
| ENST0. | 2p23.3  | . | . | .  | .          | .         | .            | . | . | .           |
| .      | 2p11.2  | . | . | Sc | Score=409  | rs102     | ID=COSN2.    | . | . | .           |
| ENST0. | 2p11.1  | . | . | Sc | Score=219. | .         | .            | . | . | .           |
| ENST0. | 2p11.1  | . | . | Sc | Score=223  | rs200     | ID=COSN2.    | . | . | .           |
| ENST0. | 2q11.1  | . | . | Sc | .          | rs202     | ID=COSN1.    | . | . | .           |
| ENST0. | 2q11.2  | . | . | Sc | .          | rs369     | ID=COSN1.    | . | . | .           |
| ENST0. | 2q12.3  | . | . | Sc | .          | rs541     | ID=COSM1.    | . | . | 0.002 4E-04 |
| ENST0. | 2q12.3  | . | . | Sc | .          | rs105.    | .            | . | . | .           |
| ENST0. | 2q13    | . | . | Sc | .          | ID=COSN2. | .            | . | . | .           |
| .      | 2q21.1  | . | . | Sc | .          | rs538.    | .            | . | . | 0.001 2E-04 |
| ENST0. | 2q24.2  | . | . | .  | .          | .         | .            | . | . | .           |
| ENST0. | 2q31.1  | . | . | .  | .          | rs187.    | .            | . | . | 0.003 6E-04 |
| ENST0. | 2q31.2  | . | . | .  | .          | .         | .            | . | . | .           |
| ENST0. | 2q33.2  | . | . | .  | .          | .         | .            | . | . | .           |
| ENST0. | 2q35    | . | . | .  | .          | .         | .            | . | . | .           |
| ENST0. | 2q36.3  | . | . | .  | .          | rs150.    | Be.          | . | . | 0.026 0.005 |
| ENST0. | 2q37.1  | . | . | .  | .          | ID=COSM1. | .            | . | . | .           |
| .      | 2q37.3  | . | . | Sc | .          | rs797.    | .            | . | . | .           |
| ENST0. | 3p26.1  | . | . | .  | .          | .         | .            | . | . | .           |
| ENST0. | 3p23    | . | . | .  | .          | .         | .            | . | . | .           |
| ENST0. | 3p21.31 | . | . | Sc | .          | rs677     | ID=COSM2.    | . | . | .           |
| ENST0. | 3p21.31 | . | . | Sc | .          | rs677     | ID=COSN2.    | . | . | .           |
| ENST0. | 3p14.1  | . | . | .  | .          | rs547.    | .            | . | . | .           |
| ENST0. | 3p13    | . | . | .  | .          | .         | .            | . | . | .           |
| ENST0. | 3q21.2  | . | . | Sc | .          | .         | .            | . | . | .           |
| ENST0. | 3q26.32 | . | . | Sc | .          | rs121     | ID=COSM1 Pa. | . | . | .           |
| ENST0. | 3q26.33 | . | . | .  | .          | .         | .            | . | . | .           |
| ENST0. | 3q28    | . | . | .  | .          | .         | .            | . | . | .           |
| ENST0. | 3q29    | . | . | .  | Score=234. | .         | .            | . | . | .           |
| ENST0. | 3q29    | . | . | Sc | .          | rs485.    | .            | . | . | .           |
| ENST0. | 4p16.3  | . | . | .  | .          | .         | .            | . | . | .           |
| ENST0. | 4p16.1  | . | . | Sc | .          | .         | .            | . | . | .           |
| ENST0. | 4p16.1  | . | . | Sc | .          | .         | .            | . | . | .           |
| .      | 4p16.1  | . | . | Sc | .          | rs796.    | .            | . | . | .           |
| ENST0. | 4p14    | . | . | .  | .          | .         | .            | . | . | .           |
| .      | 4p11    | . | . | Sc | Score=214. | ID=COSN2. | .            | . | . | .           |
| ENST0. | 4q12    | . | . | .  | .          | .         | .            | . | . | .           |
| ENST0. | 4q21.21 | . | . | .  | Score=219  | rs370.    | .            | . | . | .           |
| ENST0. | 4q23    | . | . | .  | .          | .         | .            | . | . | .           |
| ENST0. | 4q24    | . | . | .  | .          | .         | .            | . | . | .           |
| ENST0. | 4q26    | . | . | .  | .          | .         | .            | . | . | .           |
| ENST0. | 4q31.21 | . | . | Sc | .          | rs201     | ID=COSM1.    | . | . | .           |
| ENST0. | 4q34.2  | . | . | .  | .          | .         | .            | . | . | .           |
| ENST0. | 4q35.2  | . | . | .  | .          | rs761.    | .            | . | . | .           |
| ENST0. | 5p15.31 | . | . | Sc | .          | rs868     | ID=COSN1.    | . | . | .           |
| ENST0. | 5p15.2  | . | . | .  | .          | .         | .            | . | . | .           |
| .      | 5p15.1  | . | . | Sc | Score=175. | .         | .            | . | . | .           |
| ENST0. | 5p13.2  | . | . | Sc | Score=142. | .         | .            | . | . | .           |
| .      | 5q11.1  | . | . | .  | Score=122  | rs865     | ID=COSN2.    | . | . | .           |
| .      | 5q11.1  | . | . | .  | Score=121  | rs133     | ID=COSN2.    | . | . | .           |



|        |         |   |        |                              |   |   |       |       |
|--------|---------|---|--------|------------------------------|---|---|-------|-------|
| .      | 5q11.1  | . | .      | Score=119 rs148 ID=COSN2.    | . | . | 0.018 | 0.038 |
| ENST0. | 5q12.3  | . | Sc.    | Score=23;l.                  | . | . | .     | .     |
| ENST0. | 5q14.1  | . | .      | Score=789 rs141.             | . | . | 0.425 | 0.237 |
| ENST0. | 5q32    | . | .      | .                            | . | . | .     | .     |
| ENST0. | 5q35.1  | . | .      | Score=255 rs728.             | . | . | .     | .     |
| ENST0. | 5q35.3  | . | .      | rs182.                       | . | . | .     | 4E-04 |
| ENST0. | 6p21.33 | . | Sc Sc. | rs774 ID=COSM.               | . | . | 0.027 | 0.026 |
| ENST0. | 6p21.33 | . | Sc.    | rs140.                       | . | . | 0.149 | 0.047 |
| ENST0. | 6p21.2  | . | .      | Score=474 rs759.             | . | . | .     | .     |
| .      | 6p11.1  | . | .      | Score=118 rs492 ID=COSN1.    | . | . | .     | .     |
| ENST0. | 6q22.1  | . | Sc Sc. | .                            | . | . | .     | .     |
| ENST0. | 7p22.3  | . | .      | .                            | . | . | .     | .     |
| ENST0. | 7p14.1  | . | .      | rs746.                       | . | . | .     | .     |
| ENST0. | 7p13    | . | .      | rs776 ID=COSM.               | . | . | .     | .     |
| .      | 7p11.2  | . | .      | Sc Score=188.                | . | . | .     | .     |
| ENST0. | 7p11.2  | . | Sc.    | .                            | . | . | .     | .     |
| ENST0. | 7p11.2  | . | Sc.    | rs142.                       | . | . | .     | .     |
| .      | 7q11.21 | . | .      | Score=133 rs446.             | . | . | .     | .     |
| .      | 7q11.21 | . | Sc.    | .                            | . | . | .     | .     |
| .      | 7q11.21 | . | Sc.    | rs374.                       | . | . | .     | .     |
| .      | 7q11.21 | . | Sc.    | rs867.                       | . | . | .     | .     |
| .      | 7q11.21 | . | Sc.    | .                            | . | . | .     | .     |
| .      | 7q11.21 | . | Sc.    | .                            | . | . | .     | .     |
| ENST0. | 7q11.23 | . | .      | Sc Score=254 rs554.          | . | . | 0.011 | 0.002 |
| ENST0. | 7q22.1  | . | .      | Sc Score=215 rs375.          | . | . | .     | .     |
| ENST0. | 7q31.1  | . | Sc.    | .                            | . | . | .     | .     |
| ENST0. | 7q36.1  | . | .      | Score=216.                   | . | . | .     | .     |
| ENST0. | 7q36.1  | . | .      | .                            | . | . | .     | .     |
| ENST0. | 7q36.1  | . | .      | .                            | . | . | .     | .     |
| ENST0. | 7q36.3  | . | .      | rs868 ID=COSN1.              | . | . | .     | .     |
| ENST0. | 8p23.3  | . | .      | .                            | . | . | .     | .     |
| .      | 8p23.1  | . | .      | Sc Score=942 rs398 ID=COSN2. | . | . | .     | .     |
| .      | 8p23.1  | . | Sc.    | .                            | . | . | .     | .     |
| ENST0. | 8p23.1  | . | .      | rs746 ID=COSM.               | . | . | .     | .     |
| .      | 8p23.1  | . | Sc.    | rs759.                       | . | . | .     | .     |
| ENST0. | 8p23.1  | . | .      | .                            | . | . | .     | .     |
| ENST0. | 8p22    | . | .      | .                            | . | . | .     | .     |
| .      | 8q11.1  | . | .      | Score=124.                   | . | . | .     | .     |
| .      | 8q11.1  | . | .      | Score=124 rs444.             | . | . | .     | .     |
| ENST0. | 8q21.13 | . | .      | Score=261.                   | . | . | .     | .     |
| ENST0. | 8q23.3  | . | .      | .                            | . | . | .     | .     |
| ENST0. | 8q24.3  | . | .      | .                            | . | . | .     | .     |
| ENST0. | 9p22.1  | . | .      | rs535.                       | . | . | .     | 6E-04 |
| ENST0. | 9p13.2  | . | .      | rs562.                       | . | . | .     | 2E-04 |
| ENST0. | 9p13.1  | . | Sc Sc. | rs141 ID=COSM.               | . | . | .     | .     |
| ENST0. | 9p12    | . | Sc.    | rs375 ID=COSN1.              | . | . | .     | .     |
| .      | 9p12    | . | .      | Sc Score=288 rs536.          | . | . | 0.002 | 4E-04 |
| ENST0. | 9q13    | . | Sc.    | rs779.                       | . | . | .     | .     |
| .      | 9q13    | . | Sc.    | rs196.                       | . | . | .     | .     |
| ENST0. | 9q13    | . | Sc Sc. | rs625 ID=COSN.               | . | . | 0.37  | 0.321 |
| ENST0. | 9q22.2  | . | Sc.    | ID=COSN2.                    | . | . | .     | .     |
| .      | 9q33.2  | . | .      | rs578.                       | . | . | .     | 6E-04 |
| ENST0. | 9q34.2  | . | .      | .                            | . | . | .     | .     |



|       |          |   |    |                |                          |   |   |   |   |   |   |   |       |
|-------|----------|---|----|----------------|--------------------------|---|---|---|---|---|---|---|-------|
| ENST0 | 14q21.3  | . | .  | .              | .                        | . | . | . | . | . | . | . | .     |
| ENST0 | 14q24.2  | . | .  | .              | .                        | . | . | . | . | . | . | . | .     |
| ENST0 | 14q24.3  | . | .  | .              | .                        | . | . | . | . | . | . | . | .     |
| ENST0 | 14q32.2  | . | .  | .              | Score=190                | . | . | . | . | . | . | . | .     |
| ENST0 | 14q32.2  | . | .  | .              | rs931                    | . | . | . | . | . | . | . | .     |
| ENST0 | 14q32.32 | . | .  | .              | .                        | . | . | . | . | . | . | . | .     |
| ENST0 | 15q11.2  | . | .  | Sc             | rs225                    | . | . | . | . | . | . | . | .     |
| ENST0 | 15q13.2  | . | .  | Sc             | rs264                    | . | . | . | . | . | . | . | .     |
| ENST0 | 15q13.2  | . | .  | Sc             | rs201                    | . | . | . | . | . | . | . | .     |
| ENST0 | 15q13.3  | . | .  | Sc             | rs200 ID=COSN2           | . | . | . | . | . | . | . | .     |
| ENST0 | 15q14    | . | Sc | .              | .                        | . | . | . | . | . | . | . | .     |
| ENST0 | 15q15.1  | . | Sc | .              | .                        | . | . | . | . | . | . | . | .     |
| ENST0 | 15q21.1  | . | .  | .              | Score=444                | . | . | . | . | . | . | . | .     |
| ENST0 | 15q22.2  | . | .  | .              | .                        | . | . | . | . | . | . | . | .     |
| ENST0 | 15q23    | . | .  | .              | .                        | . | . | . | . | . | . | . | .     |
| ENST0 | 15q24.1  | . | .  | .              | Score=820                | . | . | . | . | . | . | . | .     |
| ENST0 | 15q24.2  | . | Sc | .              | ID=COSN2                 | . | . | . | . | . | . | . | .     |
| ENST0 | 15q24.2  | . | Sc | rs140 ID=COSN1 | .                        | . | . | . | . | . | . | . | .     |
| ENST0 | 15q24.3  | . | .  | .              | Score=216 rs878          | . | . | . | . | . | . | . | .     |
| ENST0 | 15q25.2  | . | Sc | rs287 ID=COSN1 | .                        | . | . | . | . | . | . | . | .     |
| ENST0 | 15q26.1  | . | .  | .              | .                        | . | . | . | . | . | . | . | .     |
| ENST0 | 15q26.3  | . | .  | .              | rs772                    | . | . | . | . | . | . | . | .     |
| ENST0 | 15q26.3  | . | Sc | .              | ID=COSM2                 | . | . | . | . | . | . | . | .     |
| ENST0 | 16p13.11 | . | Sc | rs776 ID=COSN2 | .                        | . | . | . | . | . | . | . | .     |
| ENST0 | 16p13.11 | . | Sc | .              | .                        | . | . | . | . | . | . | . | .     |
| ENST0 | 16p11.2  | . | Sc | .              | .                        | . | . | . | . | . | . | . | .     |
| ENST0 | 16p11.2  | . | Sc | .              | .                        | . | . | . | . | . | . | . | .     |
| ENST0 | 16p11.2  | . | Sc | rs211          | .                        | . | . | . | . | . | . | . | .     |
| ENST0 | 16p11.2  | . | Sc | rs112          | .                        | . | . | . | . | . | . | . | .     |
| ENST0 | 16p11.2  | . | .  | .              | .                        | . | . | . | . | . | . | . | .     |
| ENST0 | 16p11.1  | . | .  | .              | rs554                    | . | . | . | . | . | . | . | 2E-04 |
| .     | 16p11.1  | . | .  | .              | Score=354 rs371          | . | . | . | . | . | . | . | .     |
| .     | 16q11.2  | . | .  | .              | Score=108 rs496 ID=COSN1 | . | . | . | . | . | . | . | .     |
| .     | 16q11.2  | . | .  | .              | Score=117 rs427 ID=COSN1 | . | . | . | . | . | . | . | .     |
| .     | 16q11.2  | . | .  | .              | Score=117 rs434          | . | . | . | . | . | . | . | .     |
| .     | 16q11.2  | . | .  | .              | Score=113 rs424          | . | . | . | . | . | . | . | .     |
| .     | 16q11.2  | . | .  | .              | Score=110 rs590          | . | . | . | . | . | . | . | .     |
| .     | 16q11.2  | . | .  | .              | Score=111 rs424          | . | . | . | . | . | . | . | .     |
| .     | 16q11.2  | . | .  | .              | Score=111 rs718 ID=COSN2 | . | . | . | . | . | . | . | .     |
| .     | 16q11.2  | . | .  | .              | Score=111 rs424          | . | . | . | . | . | . | . | .     |
| .     | 16q11.2  | . | .  | .              | Score=112 rs450          | . | . | . | . | . | . | . | .     |
| .     | 16q11.2  | . | .  | .              | Score=112 rs124          | . | . | . | . | . | . | . | .     |
| .     | 16q11.2  | . | .  | .              | rs139 ID=COSN1           | . | . | . | . | . | . | . | .     |
| .     | 16q11.2  | . | .  | .              | rs561                    | . | . | . | . | . | . | . | .     |
| .     | 16q11.2  | . | .  | .              | Score=114 rs496          | . | . | . | . | . | . | . | .     |
| .     | 16q11.2  | . | .  | .              | Score=114 rs445 ID=COSN1 | . | . | . | . | . | . | . | .     |
| .     | 16q11.2  | . | .  | .              | Score=979 rs805          | . | . | . | . | . | . | . | .     |
| .     | 16q11.2  | . | .  | .              | Score=979 rs424          | . | . | . | . | . | . | . | .     |
| .     | 16q11.2  | . | .  | .              | Score=979 rs805          | . | . | . | . | . | . | . | .     |
| .     | 16q11.2  | . | .  | .              | Score=979 rs424          | . | . | . | . | . | . | . | .     |
| .     | 16q11.2  | . | .  | .              | Score=102 rs288          | . | . | . | . | . | . | . | .     |
| .     | 16q11.2  | . | .  | .              | Score=102 rs615          | . | . | . | . | . | . | . | .     |
| .     | 16q11.2  | . | .  | .              | Score=102                | . | . | . | . | . | . | . | .     |
| .     | 16q11.2  | . | .  | .              | Score=112 rs287          | . | . | . | . | . | . | . | .     |

|        |          |   |      |                           |                 |      |   |       |       |
|--------|----------|---|------|---------------------------|-----------------|------|---|-------|-------|
| .      | 16q11.2  | . | .    | Score=112.                | .               | .    | . | .     | .     |
| .      | 16q11.2  | . | .    | Score=110 rs147.          | .               | .    | . | .     | .     |
| .      | 16q11.2  | . | .    | Score=110 rs867.          | .               | .    | . | .     | .     |
| ENST0. | 16q22.2  | . | .    | Scs Score=193.            | .               | .    | . | .     | .     |
| ENST0. | 16q22.2  | . | .    | Scs.                      | rs189.          | .    | . | 0.003 | 1E-03 |
| ENST0. | 16q22.2  | . | .    | Scs.                      | rs129 ID=COSN2. | .    | . | 0.259 | 0.317 |
| ENST0. | 16q23.1  | . | .    | .                         | .               | .    | . | .     | .     |
| ENST0. | 16q24.3  | . | .    | .                         | .               | .    | . | .     | .     |
| ENST0. | 16q24.3  | . | .    | .                         | rs769.          | .    | . | .     | .     |
| ENST0. | 16q24.3  | . | .    | Scs.                      | rs794.          | .    | . | .     | .     |
| ENST0. | 16q24.3  | . | .    | Scs.                      | rs369 ID=COSN2. | .    | . | .     | .     |
| ENST0. | 16q24.3  | . | .    | Scs.                      | rs559 ID=COSN2. | .    | . | 0.752 | 0.533 |
| ENST0. | 17p13.1  | . | .    | .                         | .               | .    | . | .     | .     |
| ENST0. | 17p13.1  | . | .    | .                         | .               | .    | . | .     | .     |
| ENST0. | 17p13.1  | . | .    | .                         | .               | .    | . | .     | .     |
| ENST0. | 17p12    | . | .    | .                         | rs980.          | .    | . | .     | .     |
| ENST0. | 17p12    | . | .    | .                         | rs757.          | .    | . | .     | .     |
| ENST0. | 17p11.2  | . | .    | Scs.                      | rs146 ID=COSN1. | .    | . | .     | .     |
| ENST0. | 17p11.2  | . | .    | Scs.                      | rs216 ID=COSN1. | .    | . | 0.171 | 0.134 |
| .      | 17p11.2  | . | .    | Scs Score=297.            | .               | .    | . | .     | .     |
| .      | 17p11.1  | . | .    | Score=113 rs436 ID=COSN2. | .               | .    | . | .     | .     |
| .      | 17p11.1  | . | .    | Score=113 rs428 ID=COSN2. | .               | .    | . | .     | .     |
| .      | 17p11.1  | . | .    | Score=113 rs140.          | .               | .    | . | .     | .     |
| .      | 17p11.1  | . | .    | Score=113 rs140.          | .               | .    | . | .     | .     |
| ENST0. | 17q11.2  | . | .    | Scs.                      | .               | .    | . | .     | .     |
| ENST0. | 17q12    | . | .    | Scs.                      | rs712.          | .    | . | .     | .     |
| ENST0. | 17q12    | . | .    | Scs.                      | rs573.          | .    | . | .     | .     |
| ENST0. | 17q12    | . | .    | Scs.                      | rs969.          | .    | . | .     | .     |
| ENST0. | 17q12    | . | .    | Scs Score=213.            | .               | .    | . | .     | .     |
| ENST0. | 17q12    | . | .    | .                         | .               | .    | . | .     | .     |
| ENST0. | 17q22    | . | .    | Score=225.                | .               | .    | . | .     | .     |
| ENST0. | 17q23.2  | . | .    | Scs.                      | rs751.          | .    | . | .     | .     |
| ENST0. | 17q24.1  | . | Scs. | .                         | rs760.          | Lik. | . | .     | .     |
| ENST0. | 17q25.2  | . | .    | .                         | .               | .    | . | .     | .     |
| ENST0. | 17q25.3  | . | .    | Score=821.                | .               | .    | . | .     | .     |
| ENST0. | 17q25.3  | . | .    | .                         | rs113.          | .    | . | .     | 0.053 |
| ENST0. | 17q25.3  | . | .    | Score=821 rs879.          | .               | .    | . | .     | .     |
| .      | 18p11.32 | . | .    | Scs.                      | .               | .    | . | .     | .     |
| ENST0. | 18p11.21 | . | .    | Scs.                      | rs865 ID=COSN6. | .    | . | .     | .     |
| ENST0. | 18p11.21 | . | .    | Scs.                      | rs867.          | .    | . | .     | .     |
| ENST0. | 19p13.3  | . | .    | .                         | .               | .    | . | .     | .     |
| .      | 19p13.3  | . | .    | .                         | rs375.          | .    | . | .     | .     |
| ENST0. | 19p13.3  | . | .    | .                         | .               | .    | . | .     | .     |
| ENST0. | 19p13.3  | . | .    | .                         | .               | .    | . | .     | .     |
| ENST0. | 19p13.2  | . | .    | .                         | rs546.          | .    | . | .     | 2E-04 |
| ENST0. | 19p13.12 | . | .    | .                         | .               | .    | . | .     | .     |
| ENST0. | 19q13.11 | . | .    | .                         | .               | .    | . | .     | .     |
| ENST0. | 19q13.12 | . | .    | .                         | .               | .    | . | .     | .     |
| .      | 19q13.12 | . | .    | Scs Score=349 rs238.      | .               | .    | . | .     | .     |
| .      | 19q13.12 | . | .    | Scs Score=123 rs712.      | .               | .    | . | .     | .     |
| ENST0. | 19q13.2  | . | .    | .                         | .               | .    | . | .     | .     |
| ENST0. | 19q13.2  | . | .    | Scs.                      | rs139.          | .    | . | 0.204 | 0.13  |
| ENST0. | 19q13.41 | . | .    | .                         | rs771.          | .    | . | .     | .     |

|        |          |   |     |                           |     |   |       |       |
|--------|----------|---|-----|---------------------------|-----|---|-------|-------|
| ENST0. | 19q13.42 | . | Sc. | rs178 ID=COSM1.           | .   | . | 0.601 | 0.722 |
| .      | 19q13.42 | . | .   | rs920.                    | .   | . | .     | .     |
| ENST0. | 20p12.1  | . | Sc. | .                         | .   | . | .     | .     |
| ENST0. | 20p11.21 | . | .   | Score=353.                | .   | . | .     | .     |
| ENST0. | 20p11.21 | . | Sc. | rs778 ID=COSM1.           | .   | . | .     | .     |
| ENST0. | 20p11.21 | . | .   | rs377.                    | .   | . | .     | .     |
| ENST0. | 20q11.21 | . | Sc. | ID=COSN2.                 | .   | . | .     | .     |
| ENST0. | 20q13.12 | . | .   | .                         | .   | . | .     | .     |
| ENST0. | 20q13.12 | . | .   | Score=333.                | .   | . | .     | .     |
| ENST0. | 20q13.33 | . | .   | .                         | .   | . | .     | .     |
| .      | 21p11.2  | . | Sc  | Score=192 rs374.          | .   | . | .     | .     |
| .      | 21p11.2  | . | Sc  | Score=208 rs373.          | .   | . | .     | .     |
| .      | 21p11.2  | . | Sc  | Score=218 rs292 ID=COSN1. | .   | . | .     | .     |
| ENST0. | 21p11.1  | . | Sc. | rs199.                    | .   | . | .     | .     |
| ENST0. | 21p11.1  | . | Sc  | Score=914 rs878 ID=COSN1. | .   | . | .     | .     |
| .      | 21p11.1  | . | Sc. | rs435.                    | .   | . | .     | .     |
| .      | 21p11.1  | . | Sc. | .                         | .   | . | .     | .     |
| .      | 21q22.11 | . | .   | Score=120 rs866.          | .   | . | .     | .     |
| ENST0. | 21q22.12 | . | .   | Score=454 rs796 ID=COSN1. | .   | . | .     | .     |
| ENST0. | 21q22.3  | . | Sc. | .                         | .   | . | .     | .     |
| ENST0. | 21q22.3  | . | .   | .                         | .   | . | .     | .     |
| .      | 21q22.3  | . | Sc. | .                         | .   | . | .     | .     |
| ENST0. | 22q11.21 | . | Sc. | Score=208.                | .   | . | .     | .     |
| ENST0. | 22q11.21 | . | Sc. | rs370.                    | .   | . | .     | .     |
| ENST0. | 22q11.21 | . | Sc. | rs111.                    | .   | . | 0.134 | 0.078 |
| ENST0. | 22q11.21 | . | Sc. | rs188.                    | .   | . | 0.018 | 0.029 |
| ENST0. | 22q11.21 | . | Sc. | ID=COSN1.                 | .   | . | .     | .     |
| ENST0. | Xp22.31  | . | Sc. | rs163 ID=COSM1.           | .   | . | .     | .     |
| ENST0. | Xp22.2   | . | .   | .                         | .   | . | .     | .     |
| ENST0. | Xp21.3   | . | Sc. | .                         | .   | . | .     | .     |
| .      | Xp21.2   | . | .   | .                         | .   | . | .     | .     |
| ENST0. | Xp21.1   | . | .   | rs774 ID=COSM1.           | .   | . | .     | 5E-04 |
| ENST0. | Xp11.23  | . | .   | .                         | .   | . | .     | .     |
| ENST0. | Xp11.23  | . | .   | .                         | .   | . | .     | .     |
| .      | Xq11.1   | . | .   | Score=120.                | .   | . | .     | .     |
| .      | Xq11.1   | . | .   | Score=120 rs868.          | .   | . | .     | .     |
| .      | Xq11.1   | . | .   | Score=120.                | .   | . | .     | .     |
| .      | Xq11.1   | . | .   | Score=120. ID=COSN1.      | .   | . | .     | .     |
| ENST0. | Xq13.1   | . | .   | .                         | .   | . | .     | .     |
| ENST0. | Xq22.1   | . | .   | .                         | .   | . | .     | .     |
| .      | Xq22.2   | . | .   | Score=193.                | .   | . | .     | .     |
| ENST0. | Xq23     | . | .   | .                         | .   | . | .     | .     |
| ENST0. | Xq26.1   | . | .   | .                         | .   | . | .     | .     |
| ENST0. | Xq26.2   | . | .   | .                         | .   | . | .     | .     |
| ENST0. | Xq26.3   | . | .   | rs988.                    | .   | . | .     | .     |
| ENST0. | Xq27.1   | . | .   | Score=119.                | .   | . | .     | .     |
| ENST0. | Xq27.3   | . | .   | rs782 ID=COSN1.           | .   | . | .     | .     |
| ENST0. | Xq28     | . | .   | .                         | .   | . | .     | .     |
| .      | Yq12     | . | Sc. | rs376 ID=COSN1.           | .   | . | .     | .     |
| .      | .        | . | .   | rs105.                    | Ur. | . | .     | .     |
| ENST0. | 1p36.33  | . | Sc. | ID=COSN2.                 | .   | . | .     | .     |
| ENST0. | 1p36.33  | . | Sc  | Score=162.                | .   | . | .     | .     |
| ENST0. | 1p36.32  | . | Sc. | .                         | .   | . | .     | .     |



|        |         |   |     |                           |                           |                           |   |       |       |
|--------|---------|---|-----|---------------------------|---------------------------|---------------------------|---|-------|-------|
| .      | 4p16.1  | . | Sc. | rs879.                    | .                         | .                         | . | .     | .     |
| .      | 4p11    | . | Sc  | Score=160 rs594.          | .                         | .                         | . | .     | .     |
| ENST0. | 4q13.3  | . | .   | .                         | .                         | .                         | . | .     | .     |
| ENST0. | 4q32.3  | . | .   | Score=408.                | .                         | .                         | . | .     | .     |
| ENST0. | 5p13.2  | . | .   | Sc                        | Score=132 rs428 ID=COSN1. | .                         | . | .     | .     |
| ENST0. | 5p13.2  | . | .   | Sc                        | Score=234 rs866 ID=COSN1. | .                         | . | .     | .     |
| ENST0. | 5q31.1  | . | .   | .                         | rs776.                    | .                         | . | .     | .     |
| .      | 5q35.1  | . | .   | .                         | Score=774 rs559 ID=COSN2. | .                         | . | 0.391 | 0.381 |
| ENST0. | 5q35.3  | . | Sc. | .                         | .                         | .                         | . | .     | .     |
| ENST0. | 6p25.2  | . | .   | .                         | Score=199.                | .                         | . | .     | .     |
| ENST0. | 6p21.33 | . | Sc. | .                         | rs151.                    | .                         | . | .     | .     |
| ENST0. | 6p21.33 | . | Sc. | .                         | .                         | .                         | . | .     | .     |
| ENST0. | 6p21.31 | . | .   | .                         | rs766.                    | .                         | . | .     | .     |
| ENST0. | 6p12.3  | . | .   | .                         | .                         | .                         | . | .     | .     |
| ENST0. | 6p12.2  | . | Sc. | .                         | .                         | .                         | . | .     | .     |
| ENST0. | 6q14.1  | . | .   | .                         | .                         | .                         | . | .     | .     |
| ENST0. | 7p21.3  | . | Sc. | .                         | .                         | .                         | . | .     | .     |
| ENST0. | 7p15.3  | . | .   | .                         | .                         | .                         | . | .     | .     |
| ENST0. | 7p13    | . | .   | .                         | ID=COSM4.                 | .                         | . | .     | .     |
| ENST0. | 7p13    | . | .   | .                         | .                         | .                         | . | .     | .     |
| .      | 7p11.2  | . | Sc. | .                         | .                         | .                         | . | .     | .     |
| .      | 7p11.2  | . | Sc. | .                         | rs143.                    | .                         | . | 0.189 | 0.069 |
| ENST0. | 7p11.2  | . | Sc. | .                         | .                         | .                         | . | .     | .     |
| ENST0. | 7p11.2  | . | Sc. | .                         | rs879 ID=COSN1.           | .                         | . | .     | .     |
| ENST0. | 7p11.2  | . | Sc. | .                         | .                         | .                         | . | .     | .     |
| ENST0. | 7p11.2  | . | Sc. | .                         | rs200 ID=COSN1.           | .                         | . | .     | .     |
| ENST0. | 7p11.2  | . | Sc. | .                         | .                         | .                         | . | .     | .     |
| ENST0. | 7q11.21 | . | Sc. | .                         | rs201 ID=COSN2.           | .                         | . | .     | .     |
| ENST0. | 7q11.23 | . | Sc. | .                         | .                         | .                         | . | .     | .     |
| ENST0. | 7q11.23 | . | Sc. | .                         | .                         | .                         | . | .     | .     |
| ENST0. | 7q11.23 | . | Sc  | Score=228.                | ID=COSN2.                 | .                         | . | .     | .     |
| ENST0. | 7q21.11 | . | .   | .                         | .                         | .                         | . | .     | .     |
| ENST0. | 7q21.2  | . | .   | .                         | .                         | .                         | . | .     | .     |
| ENST0. | 7q21.3  | . | .   | .                         | rs267.                    | .                         | . | .     | .     |
| ENST0. | 7q22.1  | . | .   | .                         | rs182.                    | .                         | . | .     | 0.008 |
| ENST0. | 7q31.2  | . | .   | .                         | Score=221 rs140.          | .                         | . | .     | 0.005 |
| ENST0. | 7q35    | . | Sc. | Score=195.                | .                         | .                         | . | .     | .     |
| ENST0. | 7q36.1  | . | Sc. | .                         | .                         | .                         | . | .     | .     |
| .      | 7q36.3  | . | .   | .                         | Score=119 rs796.          | .                         | . | .     | .     |
| ENST0. | 8p23.1  | . | .   | .                         | .                         | .                         | . | .     | .     |
| .      | 8p23.1  | . | Sc. | .                         | rs376 ID=COSN2.           | .                         | . | .     | .     |
| ENST0. | 8p23.1  | . | Sc. | .                         | rs567.                    | .                         | . | 0.203 | 0.148 |
| ENST0. | 8p22    | . | .   | .                         | .                         | .                         | . | .     | .     |
| ENST0. | 8q21.3  | . | .   | .                         | .                         | .                         | . | .     | .     |
| ENST0. | 8q22.2  | . | .   | .                         | .                         | .                         | . | .     | .     |
| ENST0. | 8q24.22 | . | .   | .                         | Score=241 rs560 ID=COSN1. | .                         | . | 0.027 | 0.039 |
| ENST0. | 9p21.3  | . | .   | .                         | .                         | .                         | . | .     | .     |
| ENST0. | 9p13.3  | . | .   | .                         | Score=201 rs146 ID=COSN2. | .                         | . | 0.003 | 6E-04 |
| .      | 9p11.2  | . | .   | .                         | Sc                        | Score=748 rs749 ID=COSN2. | . | .     | .     |
| ENST0. | 9q13    | . | Sc. | .                         | .                         | .                         | . | .     | .     |
| ENST0. | 9q13    | . | Sc. | .                         | rs771.                    | .                         | . | .     | .     |
| ENST0. | 9q13    | . | Sc  | Score=540 rs445 ID=COSN2. | .                         | .                         | . | .     | .     |
| ENST0. | 9q13    | . | Sc  | Score=540 rs749 ID=COSN2. | .                         | .                         | . | .     | .     |
| ENST0. | 9q21.11 | . | Sc. | .                         | rs391.                    | .                         | . | 0.32  | 0.371 |

|        |          |   |      |      |            |           |              |   |   |       |       |       |   |
|--------|----------|---|------|------|------------|-----------|--------------|---|---|-------|-------|-------|---|
| .      | 9q21.13  | . | .    | .    | .          | .         | .            | . | . | .     | .     | .     | . |
| ENST0. | 9q21.33  | . | .    | .    | .          | .         | .            | . | . | .     | .     | .     | . |
| ENST0. | 9q34.2   | . | .    | Scc  | Score=290  | rs285     | ID=COSN1.    | . | . | .     | .     | .     | . |
| ENST0. | 9q34.3   | . | .    | .    | .          | rs777.    | Lik.         | . | . | .     | .     | .     | . |
| ENST0. | 10p13    | . | .    | .    | .          | .         | .            | . | . | .     | .     | .     | . |
| ENST0. | 10p12.33 | . | .    | .    | .          | .         | .            | . | . | .     | .     | .     | . |
| ENST0. | 10p11.21 | . | .    | .    | .          | rs774.    | .            | . | . | .     | .     | .     | . |
| ENST0. | 10p11.21 | . | .    | Scc. | .          | rs175     | ID=COSN1.    | . | . | .     | .     | .     | . |
| .      | 10q11.22 | . | .    | Scc. | .          | rs312     | ID=COSN1.    | . | . | .     | .     | .     | . |
| ENST0. | 10q22.1  | . | .    | .    | Score=350. | .         | .            | . | . | .     | .     | .     | . |
| ENST0. | 10q22.2  | . | Scc. | .    | .          | rs201.    | .            | . | . | .     | .     | .     | . |
| ENST0. | 10q23.1  | . | .    | Scc. | .          | .         | .            | . | . | .     | .     | .     | . |
| ENST0. | 10q23.2  | . | .    | Scc. | .          | rs312.    | .            | . | . | 0.524 | 0.433 | .     | . |
| ENST0. | 10q24.1  | . | .    | .    | .          | .         | .            | . | . | .     | .     | .     | . |
| ENST0. | 10q26.11 | . | .    | .    | Score=209. | .         | .            | . | . | .     | .     | .     | . |
| ENST0. | 10q26.13 | . | Scc. | .    | .          | rs549.    | .            | . | . | 0.001 | 4E-04 | .     | . |
| ENST0. | 10q26.13 | . | Scc. | .    | .          | .         | .            | . | . | .     | .     | .     | . |
| ENST0. | 11p11.2  | . | .    | .    | .          | .         | .            | . | . | .     | .     | .     | . |
| ENST0. | 11q13.2  | . | Scc. | .    | .          | .         | .            | . | . | .     | .     | .     | . |
| ENST0. | 11q14.3  | . | .    | Scc  | Score=351. | .         | .            | . | . | .     | .     | .     | . |
| ENST0. | 12p13.33 | . | .    | Scc. | .          | rs782     | ID=COSN1.    | . | . | .     | .     | .     | . |
| ENST0. | 12p13.32 | . | .    | .    | .          | .         | .            | . | . | .     | .     | .     | . |
| ENST0. | 12p13.31 | . | Scc. | .    | .          | .         | .            | . | . | .     | .     | .     | . |
| ENST0. | 12p13.31 | . | .    | .    | .          | .         | .            | . | . | .     | .     | .     | . |
| ENST0. | 12p13.31 | . | Scc. | .    | .          | .         | .            | . | . | .     | .     | .     | . |
| ENST0. | 12p12.1  | . | Scc. | .    | .          | rs121     | ID=COSMf Pa. | . | . | .     | .     | .     | . |
| ENST0. | 12p11.23 | . | .    | .    | .          | rs373.    | .            | . | . | .     | .     | .     | . |
| ENST0. | 12p11.21 | . | .    | Scc. | .          | rs403     | ID=COSMf.    | . | . | .     | .     | .     | . |
| ENST0. | 12q12    | . | .    | .    | .          | rs566     | ID=COSMf.    | . | . | .     | .     | 0.001 | . |
| ENST0. | 12q13.12 | . | .    | .    | .          | rs981     | ID=COSMf.    | . | . | .     | .     | .     | . |
| ENST0. | 12q13.2  | . | .    | .    | .          | rs140.    | .            | . | . | 0.006 | 0.001 | .     | . |
| ENST0. | 12q24.31 | . | .    | .    | .          | .         | .            | . | . | .     | .     | .     | . |
| ENST0. | 12q24.31 | . | .    | .    | .          | .         | .            | . | . | .     | .     | .     | . |
| .      | 12q24.33 | . | .    | .    | Score=112  | rs170.    | .            | . | . | 0.268 | 0.22  | .     | . |
| ENST0. | 12q24.33 | . | .    | .    | .          | rs766.    | .            | . | . | .     | .     | .     | . |
| ENST0. | 13q12.11 | . | .    | Scc. | .          | rs907.    | .            | . | . | .     | .     | .     | . |
| ENST0. | 13q12.2  | . | .    | .    | .          | .         | .            | . | . | .     | .     | .     | . |
| ENST0. | 13q12.2  | . | Scc. | .    | .          | rs766.    | .            | . | . | .     | .     | .     | . |
| ENST0. | 13q13.3  | . | .    | .    | .          | ID=COSMf. | .            | . | . | .     | .     | .     | . |
| ENST0. | 13q34    | . | .    | Scc. | .          | .         | .            | . | . | .     | .     | .     | . |
| ENST0. | 14q11.2  | . | .    | Scc. | .          | rs201     | ID=COSN1.    | . | . | .     | .     | .     | . |
| ENST0. | 14q11.2  | . | .    | Scc. | .          | rs498.    | .            | . | . | .     | .     | .     | . |
| .      | 14q11.2  | . | .    | Scc  | Score=180  | rs200.    | .            | . | . | .     | .     | .     | . |
| ENST0. | 14q11.2  | . | .    | Scc. | .          | .         | .            | . | . | .     | .     | .     | . |
| ENST0. | 14q11.2  | . | .    | Scc  | Score=384. | .         | .            | . | . | .     | .     | .     | . |
| ENST0. | 14q11.2  | . | .    | Scc. | .          | rs376.    | .            | . | . | .     | .     | .     | . |
| ENST0. | 14q11.2  | . | .    | .    | .          | .         | .            | . | . | .     | .     | .     | . |
| ENST0. | 14q11.2  | . | .    | .    | .          | rs759.    | .            | . | . | .     | .     | .     | . |
| .      | 14q32.33 | . | .    | Scc  | Score=132. | .         | .            | . | . | .     | .     | .     | . |
| ENST0. | 14q32.33 | . | .    | Scc. | .          | rs747     | ID=COSN1.    | . | . | .     | .     | .     | . |
| .      | 15q11.1  | . | .    | Scc. | .          | rs568.    | .            | . | . | 0.001 | 2E-04 | .     | . |
| ENST0. | 15q11.1  | . | .    | Scc  | Score=203  | rs576     | ID=COSN2.    | . | . | .     | .     | .     | . |
| .      | 15q11.2  | . | .    | Scc  | Score=749  | rs368.    | .            | . | . | .     | .     | .     | . |
| ENST0. | 15q11.2  | . | .    | Scc  | Score=278  | rs113.    | .            | . | . | .     | .     | .     | . |



|        |          |   |     |                           |   |   |   |   |       |       |
|--------|----------|---|-----|---------------------------|---|---|---|---|-------|-------|
| ENST0. | 15q11.2  | . | Sc. | rs199.                    | . | . | . | . | .     | .     |
| ENST0. | 15q11.2  | . | Sc. | rs183.                    | . | . | . | . | .     | .     |
| .      | 15q11.2  | . | Sc  | Score=275 rs370.          | . | . | . | . | .     | .     |
| ENST0. | 15q11.2  | . | Sc. | rs376.                    | . | . | . | . | .     | .     |
| ENST0. | 15q13.2  | . | Sc. | .                         | . | . | . | . | .     | .     |
| ENST0. | 15q15.1  | . | Sc. | Score=21; rs557.          | . | . | . | . | .     | 2E-04 |
| ENST0. | 15q15.1  | . | .   | Score=789.                | . | . | . | . | .     | .     |
| ENST0. | 15q24.1  | . | Sc. | rs744 ID=COSM1.           | . | . | . | . | .     | .     |
| ENST0. | 15q25.2  | . | Sc. | .                         | . | . | . | . | .     | .     |
| ENST0. | 16p13.3  | . | .   | .                         | . | . | . | . | .     | .     |
| ENST0. | 16p13.3  | . | .   | .                         | . | . | . | . | .     | .     |
| ENST0. | 16p13.13 | . | .   | .                         | . | . | . | . | .     | .     |
| ENST0. | 16p11.2  | . | Sc. | .                         | . | . | . | . | .     | .     |
| .      | 16q11.2  | . | .   | Score=112 rs288 ID=COSN1. | . | . | . | . | .     | .     |
| .      | 16q11.2  | . | .   | Score=108 rs496.          | . | . | . | . | .     | .     |
| .      | 16q11.2  | . | .   | Score=108 rs435.          | . | . | . | . | .     | .     |
| .      | 16q11.2  | . | .   | Score=117 rs424 ID=COSN1. | . | . | . | . | .     | .     |
| .      | 16q11.2  | . | .   | Score=117 rs437 ID=COSN1. | . | . | . | . | .     | .     |
| .      | 16q11.2  | . | .   | Score=117 rs439 ID=COSN2. | . | . | . | . | .     | .     |
| .      | 16q11.2  | . | .   | Score=117 rs424.          | . | . | . | . | .     | .     |
| .      | 16q11.2  | . | .   | Score=111 rs496 ID=COSN2. | . | . | . | . | .     | .     |
| .      | 16q11.2  | . | .   | Score=114 rs720.          | . | . | . | . | .     | .     |
| .      | 16q11.2  | . | .   | Score=111 rs782.          | . | . | . | . | .     | .     |
| .      | 16q11.2  | . | .   | Score=111 rs424.          | . | . | . | . | .     | .     |
| .      | 16q11.2  | . | .   | Score=111 rs718 ID=COSN2. | . | . | . | . | .     | .     |
| .      | 16q11.2  | . | .   | Score=111 rs997.          | . | . | . | . | .     | .     |
| .      | 16q11.2  | . | .   | Score=111 rs424.          | . | . | . | . | .     | .     |
| .      | 16q11.2  | . | .   | Score=111 rs782 ID=COSN1. | . | . | . | . | .     | .     |
| .      | 16q11.2  | . | .   | rs139 ID=COSN1.           | . | . | . | . | .     | .     |
| .      | 16q11.2  | . | .   | Score=114 rs409.          | . | . | . | . | .     | .     |
| .      | 16q11.2  | . | .   | Score=114 rs409 ID=COSN2. | . | . | . | . | .     | .     |
| .      | 16q11.2  | . | .   | Score=114 rs445.          | . | . | . | . | .     | .     |
| .      | 16q11.2  | . | .   | Score=114 rs613.          | . | . | . | . | .     | .     |
| .      | 16q11.2  | . | .   | Score=979 rs434.          | . | . | . | . | .     | .     |
| .      | 16q11.2  | . | .   | Score=979 rs445.          | . | . | . | . | .     | .     |
| .      | 16q11.2  | . | .   | Score=112 rs718 ID=COSN1. | . | . | . | . | .     | .     |
| ENST0. | 16q22.1  | . | Sc. | .                         | . | . | . | . | .     | .     |
| ENST0. | 16q22.1  | . | Sc. | rs200 ID=COSM2.no.        | . | . | . | . | .     | .     |
| ENST0. | 16q22.1  | . | Sc. | Score=217.                | . | . | . | . | .     | .     |
| ENST0. | 16q24.3  | . | .   | .                         | . | . | . | . | .     | .     |
| ENST0. | 16q24.3  | . | .   | Score=277.                | . | . | . | . | .     | .     |
| ENST0. | 17p13.3  | . | .   | Score=214.                | . | . | . | . | .     | .     |
| ENST0. | 17p13.1  | . | .   | .                         | . | . | . | . | .     | .     |
| ENST0. | 17p11.2  | . | .   | .                         | . | . | . | . | .     | .     |
| .      | 17p11.1  | . | .   | Score=113 rs144 ID=COSN1. | . | . | . | . | .     | .     |
| .      | 17p11.1  | . | .   | Score=113 rs436 ID=COSN2. | . | . | . | . | .     | .     |
| .      | 17q12    | . | Sc. | rs140 ID=COSN1.           | . | . | . | . | 0.223 | 0.344 |
| .      | 17q12    | . | Sc. | rs373.                    | . | . | . | . | 0.212 | 0.177 |
| ENST0. | 17q12    | . | Sc. | ID=COSM1.                 | . | . | . | . | .     | .     |
| ENST0. | 17q12    | . | Sc. | ID=COSN1.                 | . | . | . | . | .     | .     |
| ENST0. | 17q21.1  | . | .   | Score=324 rs867 ID=COSN1. | . | . | . | . | .     | .     |
| .      | 17q21.31 | . | .   | Score=876.                | . | . | . | . | .     | .     |
| ENST0. | 17q21.31 | . | .   | Score=200.                | . | . | . | . | .     | .     |
| ENST0. | 17q24.2  | . | .   | rs765 ID=COSM2.           | . | . | . | . | .     | .     |



|        |         |   |        |               |                 |   |   |       |       |
|--------|---------|---|--------|---------------|-----------------|---|---|-------|-------|
| .      | Xq11.1  | . | .      | Score=120.    | ID=COSN2.       | . | . | .     | .     |
| .      | Xq11.1  | . | .      | Score=120     | rs775.          | . | . | .     | .     |
| ENST0. | Xq13.2  | . | .      | .             | rs248 ID=COSN1. | . | . | 0.005 | 0.048 |
| ENST0. | Xq23    | . | .      | .             | ID=COSM1.       | . | . | .     | .     |
| ENST0. | Xq24    | . | Sc.    | .             | .               | . | . | .     | .     |
| .      | Xq25    | . | .      | .             | .               | . | . | .     | .     |
| ENST0. | Xq27.1  | . | .      | .             | rs101.          | . | . | .     | .     |
| ENST0. | Xq28    | . | .      | .             | .               | . | . | .     | .     |
| ENST0. | Xq28    | . | Sc.    | .             | rs780 ID=COSM1. | . | . | .     | .     |
| .      | .       | . | .      | .             | .               | . | . | .     | .     |
| .      | .       | . | .      | .             | rs386.          | . | . | .     | .     |
| .      | .       | . | .      | .             | .               | . | . | .     | .     |
| ENST0. | 1p36.33 | . | Sc.    | .             | rs746.          | . | . | .     | .     |
| ENST0. | 1p36.33 | . | .      | Sc Score=161. | .               | . | . | .     | .     |
| ENST0. | 1p36.22 | . | Sc.    | .             | rs145.          | . | . | .     | 2E-04 |
| ENST0. | 1p36.22 | . | Sc.    | .             | .               | . | . | .     | .     |
| ENST0. | 1p36.21 | . | .      | Sc.           | rs144.          | . | . | .     | .     |
| .      | 1p36.21 | . | .      | Sc Score=207  | rs115 ID=COSN1. | . | . | 0.096 | 0.081 |
| .      | 1p36.13 | . | .      | Sc.           | .               | . | . | .     | .     |
| ENST0. | 1p36.13 | . | .      | Sc.           | rs751 ID=COSN1. | . | . | .     | .     |
| ENST0. | 1p36.12 | . | .      | .             | ID=COSM1.       | . | . | .     | .     |
| ENST0. | 1p36.12 | . | .      | Score=636     | rs555.          | . | . | .     | 2E-04 |
| ENST0. | 1p36.11 | . | .      | .             | rs142 ID=COSM1. | . | . | 0.001 | 0.001 |
| ENST0. | 1p36.11 | . | .      | Sc Score=278. | .               | . | . | .     | .     |
| ENST0. | 1p35.2  | . | Sc.    | .             | .               | . | . | .     | .     |
| ENST0. | 1p35.1  | . | .      | .             | rs775 ID=COSM1. | . | . | .     | .     |
| ENST0. | 1p34.3  | . | .      | .             | .               | . | . | .     | .     |
| ENST0. | 1p34.3  | . | .      | .             | .               | . | . | .     | .     |
| ENST0. | 1p34.3  | . | .      | .             | .               | . | . | .     | .     |
| ENST0. | 1p34.3  | . | .      | .             | .               | . | . | .     | .     |
| ENST0. | 1p34.3  | . | .      | .             | .               | . | . | .     | .     |
| ENST0. | 1p34.2  | . | .      | Score=809.    | ID=COSN2.       | . | . | .     | .     |
| ENST0. | 1p34.1  | . | Sc Sc. | .             | rs758.          | . | . | .     | .     |
| .      | 1p34.1  | . | .      | Sc Score=104  | rs866 ID=COSN1. | . | . | .     | .     |
| ENST0. | 1p32.3  | . | .      | Score=410.    | .               | . | . | .     | .     |
| ENST0. | 1p31.3  | . | .      | .             | .               | . | . | .     | .     |
| ENST0. | 1p31.1  | . | .      | .             | .               | . | . | .     | .     |
| ENST0. | 1p31.1  | . | .      | Score=288.    | .               | . | . | .     | .     |
| ENST0. | 1p22.1  | . | .      | .             | .               | . | . | .     | .     |
| ENST0. | 1p22.1  | . | .      | .             | .               | . | . | .     | .     |
| ENST0. | 1p21.3  | . | .      | .             | .               | . | . | .     | .     |
| ENST0. | 1p13.3  | . | .      | .             | rs759.          | . | . | .     | .     |
| ENST0. | 1p13.2  | . | .      | .             | .               | . | . | .     | .     |
| ENST0. | 1p11.2  | . | Sc.    | .             | rs200 ID=COSN1. | . | . | .     | .     |
| ENST0. | 1q21.1  | . | Sc.    | .             | rs104.          | . | . | .     | .     |
| .      | 1q21.1  | . | Sc.    | .             | .               | . | . | .     | .     |
| ENST0. | 1q21.1  | . | .      | Sc Score=169  | rs200.          | . | . | .     | .     |
| ENST0. | 1q21.1  | . | Sc.    | .             | rs750.          | . | . | .     | .     |
| ENST0. | 1q21.1  | . | Sc.    | .             | rs169.          | . | . | .     | .     |
| ENST0. | 1q21.1  | . | Sc.    | .             | rs412 ID=COSN1. | . | . | .     | .     |
| ENST0. | 1q21.1  | . | Sc.    | .             | .               | . | . | .     | .     |
| ENST0. | 1q21.1  | . | Sc.    | .             | .               | . | . | .     | .     |
| ENST0. | 1q21.2  | . | Sc.    | .             | rs618 ID=COSN1. | . | . | .     | .     |
| .      | 1q21.2  | . | Sc.    | .             | rs879.          | . | . | .     | .     |













|        |          |   |     |     |            |                 |      |   |   |       |       |
|--------|----------|---|-----|-----|------------|-----------------|------|---|---|-------|-------|
| ENST0. | 11q13.1  | . | .   | .   | .          | .               | .    | . | . | .     | .     |
| ENST0. | 11q13.1  | . | .   | .   | .          | rs745.          | .    | . | . | .     | .     |
| ENST0. | 11q13.4  | . | .   | .   | .          | .               | .    | . | . | .     | .     |
| ENST0. | 11q23.2  | . | .   | .   | .          | .               | .    | . | . | .     | .     |
| ENST0. | 11q23.3  | . | .   | Sc. | .          | rs352.          | .    | . | . | .     | .     |
| ENST0. | 11q23.3  | . | .   | Sc. | .          | rs358 ID=COSN2. | .    | . | . | .     | .     |
| ENST0. | 11q24.2  | . | .   | .   | .          | rs920.          | .    | . | . | .     | .     |
| ENST0. | 11q24.3  | . | Sc. | .   | .          | .               | .    | . | . | .     | .     |
| ENST0. | 12p13.31 | . | .   | .   | .          | .               | .    | . | . | .     | .     |
| ENST0. | 12p13.31 | . | .   | .   | .          | .               | .    | . | . | .     | .     |
| ENST0. | 12p13.31 | . | .   | .   | .          | .               | .    | . | . | .     | .     |
| ENST0. | 12p11.21 | . | Sc  | Sc. | .          | rs712 ID=COSM6. | .    | . | . | 0.131 | 0.104 |
| ENST0. | 12p11.21 | . | .   | .   | .          | .               | .    | . | . | .     | .     |
| ENST0. | 12q12    | . | .   | .   | .          | .               | .    | . | . | .     | .     |
| ENST0. | 12q12    | . | .   | .   | .          | .               | .    | . | . | .     | .     |
| ENST0. | 12q14.1  | . | .   | .   | .          | .               | .    | . | . | .     | .     |
| ENST0. | 12q14.1  | . | .   | .   | .          | .               | .    | . | . | .     | .     |
| ENST0. | 12q14.2  | . | .   | .   | Score=399  | rs867.          | .    | . | . | .     | .     |
| ENST0. | 12q15    | . | .   | .   | .          | rs910.          | .    | . | . | .     | .     |
| ENST0. | 12q21.31 | . | .   | .   | Score=383  | rs964.          | .    | . | . | .     | .     |
| ENST0. | 12q21.32 | . | .   | .   | .          | .               | .    | . | . | .     | .     |
| ENST0. | 12q22    | . | .   | .   | .          | .               | .    | . | . | .     | .     |
| ENST0. | 12q23.2  | . | .   | .   | .          | .               | .    | . | . | .     | .     |
| ENST0. | 12q24.21 | . | .   | .   | Score=672. | .               | .    | . | . | .     | .     |
| ENST0. | 12q24.21 | . | .   | .   | .          | .               | .    | . | . | .     | .     |
| ENST0. | 12q24.23 | . | .   | .   | .          | .               | .    | . | . | .     | .     |
| ENST0. | 12q24.31 | . | .   | .   | .          | rs754.          | .    | . | . | .     | .     |
| ENST0. | 12q24.31 | . | .   | .   | .          | .               | .    | . | . | .     | .     |
| ENST0. | 12q24.33 | . | .   | .   | .          | .               | .    | . | . | .     | .     |
| ENST0. | 13q12.11 | . | .   | .   | .          | .               | .    | . | . | .     | .     |
| ENST0. | 13q13.3  | . | .   | .   | .          | .               | .    | . | . | .     | .     |
| ENST0. | 13q14.11 | . | Sc. | .   | .          | .               | .    | . | . | .     | .     |
| ENST0. | 13q32.3  | . | .   | .   | .          | .               | .    | . | . | .     | .     |
| ENST0. | 13q33.1  | . | .   | .   | .          | rs772.          | .    | . | . | .     | .     |
| ENST0. | 14q11.2  | . | .   | Sc. | .          | rs145.          | .    | . | . | .     | .     |
| .      | 14q11.2  | . | .   | .   | .          | .               | .    | . | . | .     | .     |
| ENST0. | 14q11.2  | . | .   | Sc. | .          | .               | .    | . | . | .     | .     |
| ENST0. | 14q11.2  | . | .   | Sc. | .          | .               | .    | . | . | .     | .     |
| ENST0. | 14q21.1  | . | .   | .   | .          | .               | .    | . | . | .     | .     |
| .      | 14q21.3  | . | .   | .   | Score=224. | .               | .    | . | . | .     | .     |
| ENST0. | 14q22.2  | . | .   | .   | .          | rs150.          | Lik. | . | . | .     | 2E-04 |
| ENST0. | 14q23.1  | . | .   | .   | .          | .               | .    | . | . | .     | .     |
| ENST0. | 14q23.3  | . | .   | .   | Score=220. | .               | .    | . | . | .     | .     |
| ENST0. | 14q23.3  | . | .   | .   | .          | .               | .    | . | . | .     | .     |
| ENST0. | 14q24.2  | . | .   | .   | .          | rs767.          | .    | . | . | .     | .     |
| ENST0. | 14q24.2  | . | .   | .   | .          | .               | .    | . | . | .     | .     |
| ENST0. | 14q24.3  | . | .   | .   | .          | .               | .    | . | . | .     | .     |
| ENST0. | 14q31.3  | . | .   | .   | .          | .               | .    | . | . | .     | .     |
| ENST0. | 14q32.12 | . | .   | .   | .          | .               | .    | . | . | .     | .     |
| ENST0. | 14q32.13 | . | .   | .   | .          | rs375.          | .    | . | . | .     | .     |
| ENST0. | 14q32.33 | . | .   | .   | .          | ID=COSN2.       | .    | . | . | .     | .     |
| ENST0. | 14q32.33 | . | .   | .   | .          | rs553.          | .    | . | . | .     | 2E-04 |
| .      | 14q32.33 | . | .   | Sc. | .          | rs128 ID=COSN1. | .    | . | . | .     | .     |
| ENST0. | 15q11.2  | . | .   | Sc. | .          | .               | .    | . | . | .     | .     |

|         |          |   |           |                       |   |   |   |   |       |       |
|---------|----------|---|-----------|-----------------------|---|---|---|---|-------|-------|
| ENST0 . | 15q11.2  | . | .         | Scs Score=796 .       | . | . | . | . | .     | .     |
| ENST0 . | 15q13.1  | . | Scs .     | rs540 .               | . | . | . | . | .     | 2E-04 |
| ENST0 . | 15q13.1  | . | Scs .     | .                     | . | . | . | . | .     | .     |
| ENST0 . | 15q13.1  | . | Scs .     | .                     | . | . | . | . | .     | .     |
| ENST0 . | 15q13.2  | . | Scs .     | ID=COSN2 .            | . | . | . | . | .     | .     |
| ENST0 . | 15q13.2  | . | Scs .     | rs201 .               | . | . | . | . | .     | .     |
| ENST0 . | 15q15.1  | . | .         | rs748 .               | . | . | . | . | .     | .     |
| ENST0 . | 15q15.1  | . | .         | .                     | . | . | . | . | .     | .     |
| ENST0 . | 15q15.1  | . | .         | rs775 .               | . | . | . | . | .     | .     |
| ENST0 . | 15q15.3  | . | Scs .     | .                     | . | . | . | . | .     | .     |
| ENST0 . | 15q15.3  | . | .         | rs192 .               | . | . | . | . | .     | 2E-04 |
| ENST0 . | 15q21.1  | . | .         | .                     | . | . | . | . | .     | .     |
| ENST0 . | 15q21.1  | . | Scs .     | rs620 .               | . | . | . | . | 0.422 | 0.324 |
| ENST0 . | 15q21.1  | . | Scs .     | ID=COSM2 .            | . | . | . | . | .     | .     |
| ENST0 . | 15q21.3  | . | Scs .     | .                     | . | . | . | . | .     | .     |
| ENST0 . | 15q22.2  | . | .         | .                     | . | . | . | . | .     | .     |
| ENST0 . | 15q22.31 | . | .         | rs547 .               | . | . | . | . | .     | 4E-04 |
| ENST0 . | 15q22.31 | . | .         | .                     | . | . | . | . | .     | .     |
| ENST0 . | 15q23    | . | Scs .     | .                     | . | . | . | . | .     | .     |
| ENST0 . | 15q24.1  | . | .         | .                     | . | . | . | . | .     | .     |
| .       | 15q24.2  | . | Scs .     | .                     | . | . | . | . | .     | .     |
| ENST0 . | 15q25.1  | . | Scs .     | .                     | . | . | . | . | .     | .     |
| ENST0 . | 15q25.1  | . | .         | .                     | . | . | . | . | .     | .     |
| ENST0 . | 15q25.2  | . | Scs .     | rs240 .               | . | . | . | . | .     | .     |
| ENST0 . | 15q26.1  | . | .         | .                     | . | . | . | . | .     | .     |
| ENST0 . | 15q26.1  | . | .         | .                     | . | . | . | . | .     | .     |
| ENST0 . | 15q26.2  | . | .         | .                     | . | . | . | . | .     | .     |
| ENST0 . | 15q26.3  | . | .         | .                     | . | . | . | . | .     | .     |
| ENST0 . | 15q26.3  | . | .         | rs751 ID=COSM2 .      | . | . | . | . | .     | .     |
| ENST0 . | 16p13.3  | . | Scs .     | rs750 .               | . | . | . | . | .     | .     |
| ENST0 . | 16p13.3  | . | .         | .                     | . | . | . | . | .     | .     |
| ENST0 . | 16p13.3  | . | .         | .                     | . | . | . | . | .     | .     |
| ENST0 . | 16p13.13 | . | .         | .                     | . | . | . | . | .     | .     |
| ENST0 . | 16p13.13 | . | .         | .                     | . | . | . | . | .     | .     |
| ENST0 . | 16p13.11 | . | Scs .     | .                     | . | . | . | . | .     | .     |
| ENST0 . | 16p13.11 | . | Scs .     | rs552 .               | . | . | . | . | 0.034 | 0.021 |
| ENST0 . | 16p13.11 | . | Scs .     | rs620 ID=COSN1 .      | . | . | . | . | 0.04  | 0.04  |
| ENST0 . | 16p12.3  | . | .         | rs765 .               | . | . | . | . | .     | .     |
| ENST0 . | 16p12.2  | . | .         | Score=201 .           | . | . | . | . | .     | .     |
| ENST0 . | 16p12.2  | . | .         | Score=428 .           | . | . | . | . | .     | .     |
| ENST0 . | 16p12.2  | . | Scs Scs . | .                     | . | . | . | . | .     | .     |
| ENST0 . | 16p11.2  | . | .         | .                     | . | . | . | . | .     | .     |
| ENST0 . | 16p11.2  | . | .         | .                     | . | . | . | . | .     | .     |
| ENST0 . | 16p11.2  | . | Scs .     | .                     | . | . | . | . | .     | .     |
| ENST0 . | 16p11.2  | . | .         | .                     | . | . | . | . | .     | .     |
| ENST0 . | 16p11.2  | . | .         | Scs Score=184 rs789 . | . | . | . | . | .     | .     |
| ENST0 . | 16q12.1  | . | .         | rs751 .               | . | . | . | . | .     | .     |
| ENST0 . | 16q21    | . | .         | .                     | . | . | . | . | .     | .     |
| ENST0 . | 16q22.1  | . | .         | .                     | . | . | . | . | .     | .     |
| ENST0 . | 16q22.2  | . | .         | .                     | . | . | . | . | .     | .     |
| ENST0 . | 16q23.1  | . | Scs .     | rs291 ID=COSN2 .      | . | . | . | . | .     | .     |
| ENST0 . | 16q24.3  | . | .         | Score=262 .           | . | . | . | . | .     | .     |

|        |          |   |   |     |            |            |   |   |   |       |
|--------|----------|---|---|-----|------------|------------|---|---|---|-------|
| ENST0. | 16q24.3  | . | . | Sc. | .          | ID=COSN2.  | . | . | . | .     |
| ENST0. | 17p13.2  | . | . | .   | .          | rs780.     | . | . | . | .     |
| ENST0. | 17p13.1  | . | . | .   | .          | .          | . | . | . | .     |
| ENST0. | 17p13.1  | . | . | Sc. | .          | .          | . | . | . | .     |
| ENST0. | 17p13.1  | . | . | Sc. | .          | .          | . | . | . | .     |
| ENST0. | 17p13.1  | . | . | .   | .          | .          | . | . | . | .     |
| ENST0. | 17p12    | . | . | Sc. | .          | ID=COSM4.  | . | . | . | .     |
| ENST0. | 17p12    | . | . | .   | .          | rs559.     | . | . | . | 2E-04 |
| ENST0. | 17p11.2  | . | . | .   | .          | .          | . | . | . | .     |
| ENST0. | 17p11.2  | . | . | Sc. | .          | .          | . | . | . | .     |
| ENST0. | 17p11.2  | . | . | Sc. | .          | .          | . | . | . | .     |
| ENST0. | 17p11.2  | . | . | Sc. | .          | .          | . | . | . | .     |
| ENST0. | 17p11.2  | . | . | Sc. | .          | rs784.     | . | . | . | .     |
| ENST0. | 17q11.2  | . | . | .   | .          | .          | . | . | . | .     |
| ENST0. | 17q11.2  | . | . | .   | .          | .          | . | . | . | .     |
| ENST0. | 17q11.2  | . | . | Sc. | .          | .          | . | . | . | .     |
| ENST0. | 17q11.2  | . | . | Sc. | .          | .          | . | . | . | .     |
| ENST0. | 17q11.2  | . | . | .   | .          | .          | . | . | . | .     |
| ENST0. | 17q12    | . | . | Sc. | .          | .          | . | . | . | .     |
| ENST0. | 17q12    | . | . | Sc. | .          | rs879.     | . | . | . | .     |
| ENST0. | 17q12    | . | . | .   | .          | .          | . | . | . | .     |
| ENST0. | 17q12    | . | . | .   | .          | .          | . | . | . | .     |
| ENST0. | 17q12    | . | . | .   | .          | .          | . | . | . | .     |
| ENST0. | 17q12    | . | . | Sc. | .          | .          | . | . | . | .     |
| ENST0. | 17q12    | . | . | .   | .          | .          | . | . | . | .     |
| ENST0. | 17q21.2  | . | . | .   | .          | rs103.     | . | . | . | .     |
| ENST0. | 17q21.2  | . | . | .   | .          | .          | . | . | . | .     |
| ENST0. | 17q21.31 | . | . | .   | .          | .          | . | . | . | .     |
| ENST0. | 17q21.33 | . | . | .   | .          | .          | . | . | . | .     |
| ENST0. | 17q21.33 | . | . | .   | .          | .          | . | . | . | .     |
| ENST0. | 17q22    | . | . | .   | .          | .          | . | . | . | .     |
| ENST0. | 17q23.3  | . | . | .   | .          | .          | . | . | . | .     |
| ENST0. | 17q23.3  | . | . | .   | .          | .          | . | . | . | .     |
| ENST0. | 17q24.1  | . | . | .   | .          | Score=256. | . | . | . | .     |
| ENST0. | 17q25.1  | . | . | .   | .          | .          | . | . | . | .     |
| ENST0. | 17q25.3  | . | . | .   | .          | rs140.     | . | . | . | 1E-03 |
| ENST0. | 17q25.3  | . | . | .   | .          | .          | . | . | . | .     |
| ENST0. | 17q25.3  | . | . | Sc. | .          | rs367.     | . | . | . | .     |
| ENST0. | 18p11.31 | . | . | .   | .          | .          | . | . | . | .     |
| ENST0. | 18p11.23 | . | . | Sc. | .          | .          | . | . | . | .     |
| ENST0. | 18p11.22 | . | . | .   | .          | .          | . | . | . | .     |
| ENST0. | 18p11.22 | . | . | .   | .          | .          | . | . | . | .     |
| ENST0. | 18p11.22 | . | . | Sc. | .          | .          | . | . | . | .     |
| ENST0. | 18p11.21 | . | . | Sc. | .          | .          | . | . | . | .     |
| ENST0. | 18p11.21 | . | . | Sc  | Score=468. | ID=COSN1.  | . | . | . | .     |
| ENST0. | 18q11.2  | . | . | .   | Score=917. | .          | . | . | . | .     |
| ENST0. | 18q21.1  | . | . | .   | Score=278. | .          | . | . | . | .     |
| ENST0. | 18q21.2  | . | . | .   | .          | .          | . | . | . | .     |
| ENST0. | 18q21.2  | . | . | .   | Score=355. | .          | . | . | . | .     |
| ENST0. | 18q21.33 | . | . | .   | .          | rs746.     | . | . | . | .     |
| ENST0. | 18q22.1  | . | . | .   | .          | .          | . | . | . | .     |
| ENST0. | 18q23    | . | . | .   | .          | .          | . | . | . | .     |
| .      | 19p13.3  | . | . | .   | .          | rs954.     | . | . | . | .     |







|        |         |  |     |                              |  |  |       |       |
|--------|---------|--|-----|------------------------------|--|--|-------|-------|
| ENST0. | 1q23.1  |  |     |                              |  |  |       |       |
| ENST0. | 1q41    |  | Sc. | rs183.                       |  |  | 0.404 | 0.351 |
| ENST0. | 1q42.11 |  |     | Sc Score=411.                |  |  |       |       |
| ENST0. | 1q42.11 |  |     | Sc Score=411.                |  |  |       |       |
| ENST0. | 1q42.12 |  |     |                              |  |  |       |       |
|        | 1q42.13 |  | Sc. | rs182.                       |  |  |       |       |
|        | 2p11.2  |  | Sc. | rs409 ID=COSN1.              |  |  | 0.026 | 0.052 |
| ENST0. | 2p11.2  |  | Sc. |                              |  |  |       |       |
|        | 2p11.1  |  | Sc. |                              |  |  |       |       |
| ENST0. | 2p11.1  |  | Sc. |                              |  |  |       |       |
| ENST0. | 2q13    |  | Sc. | rs201 ID=COSM1.              |  |  |       |       |
|        | 2q13    |  | Sc. | rs868 ID=COSN1.              |  |  |       |       |
| ENST0. | 2q13    |  | Sc. | rs274 ID=COSN1.              |  |  |       |       |
| ENST0. | 2q14.2  |  |     | Score=216 rs102.             |  |  |       |       |
| ENST0. | 2q21.1  |  |     | Sc Score=488 rs200.          |  |  |       |       |
| ENST0. | 2q21.2  |  | Sc. | rs780 ID=COSN1.              |  |  |       |       |
| ENST0. | 2q31.1  |  |     |                              |  |  |       |       |
| ENST0. | 2q31.1  |  |     |                              |  |  |       |       |
| ENST0. | 2q31.3  |  |     | rs187 ID=COSN1.              |  |  | 0.006 | 0.002 |
| ENST0. | 2q34    |  |     | Score=381 rs867 ID=COSN1.    |  |  |       |       |
| ENST0. | 3p21.31 |  |     |                              |  |  |       |       |
| ENST0. | 3q24    |  | Sc. |                              |  |  |       |       |
| ENST0. | 3q25.1  |  |     |                              |  |  |       |       |
| ENST0. | 3q25.1  |  |     |                              |  |  |       |       |
|        | 3q29    |  |     | Sc Score=127 rs376 ID=COSN1. |  |  |       |       |
| ENST0. | 3q29    |  |     | rs867.                       |  |  |       |       |
| ENST0. | 3q29    |  | Sc. | rs112 ID=COSN1.              |  |  |       |       |
| ENST0. | 4p16.3  |  |     |                              |  |  |       |       |
| ENST0. | 4p15.31 |  |     | rs144 ID=COSN1.              |  |  |       | 4E-04 |
| ENST0. | 5p15.1  |  |     |                              |  |  |       |       |
| ENST0. | 5p13.2  |  |     | Sc Score=212.                |  |  |       |       |
| ENST0. | 5q13.2  |  |     | Sc Score=154 rs375.          |  |  | 0.772 | 0.477 |
| ENST0. | 5q14.3  |  |     | Sc Score=215 rs879 ID=COSN1. |  |  |       |       |
| ENST0. | 5q21.1  |  | Sc. | ID=COSN1.                    |  |  |       |       |
| ENST0. | 5q33.1  |  |     |                              |  |  |       |       |
| ENST0. | 5q34    |  |     |                              |  |  |       |       |
| ENST0. | 5q35.3  |  |     |                              |  |  |       |       |
| ENST0. | 5q35.3  |  |     |                              |  |  |       |       |
|        | 6p22.2  |  |     | rs371.                       |  |  |       |       |
|        | 6p22.2  |  |     | rs920.                       |  |  |       |       |
|        | 6p11.1  |  |     | Score=118 rs429 ID=COSN1.    |  |  |       |       |
|        | 6p11.1  |  |     | Score=118 rs443 ID=COSN1.    |  |  |       |       |
| ENST0. | 6q23.3  |  |     | rs750.                       |  |  |       |       |
| ENST0. | 6q25.1  |  |     |                              |  |  |       |       |
| ENST0. | 6q27    |  | Sc. | rs143.                       |  |  |       |       |
| ENST0. | 6q27    |  |     | Score=300.                   |  |  |       |       |
| ENST0. | 7p22.2  |  |     |                              |  |  |       |       |
| ENST0. | 7p22.1  |  |     | Sc Score=29; rs201.          |  |  |       |       |
| ENST0. | 7p14.2  |  |     | Score=166.                   |  |  |       |       |
| ENST0. | 7p11.2  |  | Sc. |                              |  |  |       |       |
| ENST0. | 7p11.2  |  | Sc. | ID=COSN1.                    |  |  |       |       |
| ENST0. | 7p11.2  |  | Sc. |                              |  |  |       |       |
| ENST0. | 7p11.2  |  | Sc. |                              |  |  |       |       |
| ENST0. | 7p11.2  |  | Sc. |                              |  |  |       |       |

|        |            |         |       |                                    |                                    |             |
|--------|------------|---------|-------|------------------------------------|------------------------------------|-------------|
| ENST0. | 7p11.2     | . .     | Sc.   | . . . . .                          |                                    |             |
| ENST0. | 7p11.2     | . .     | Sc    | Score=498 . . . . .                |                                    |             |
| . . .  | 7q11.21    | . . .   | . .   | Score=133 rs459 . . . . .          |                                    |             |
| . . .  | 7q11.21    | . . .   | . .   | Score=133 rs216 ID=COSN1 . . . . . |                                    |             |
| ENST0. | 7q11.21    | . . .   | Sc.   | rs586 ID=COSN1 . . . . .           |                                    |             |
| . . .  | 7q11.21    | . . .   | Sc.   | rs868 ID=COSN2 . . . . .           |                                    |             |
| ENST0. | 7q11.23    | . . .   | Sc.   | rs246 ID=COSN2 . . . . .           |                                    |             |
| ENST0. | 7q22.1     | . . .   | Sc.   | rs624 . . . . .                    |                                    |             |
| ENST0. | 7q32.1     | . . .   | Sc.   | rs374 . . . . .                    |                                    |             |
| ENST0. | 7q36.1     | . . .   | Sc.   | . . . . .                          |                                    |             |
| . . .  | 8p23.1     | . . .   | Sc.   | rs207 ID=COSN2 . . . . .           |                                    |             |
| ENST0. | 8p11.23    | . . .   | . . . | . . . . .                          |                                    |             |
| . . .  | 8p11.1     | . . .   | . . . | Score=126 rs750 . . . . .          |                                    |             |
| . . .  | 8p11.1     | . . .   | . . . | Score=126 rs796 ID=COSN1 . . . . . |                                    |             |
| . . .  | 8p11.1     | . . .   | . . . | Score=126 . . . ID=COSN1 . . . . . |                                    |             |
| . . .  | 8q11.1     | . . .   | . . . | Score=124 rs436 ID=COSN1 . . . . . |                                    |             |
| . . .  | 8q11.1     | . . .   | . . . | Score=124 rs374 . . . . .          |                                    |             |
| ENST0. | 8q23.3     | . . .   | . . . | Score=598 . . . . .                |                                    |             |
| ENST0. | 8q24.3     | . . .   | Sc.   | . . . . .                          |                                    |             |
| ENST0. | 8q24.3     | . . .   | . . . | Score=270 rs782 ID=COSN2 . . . . . |                                    |             |
| . . .  | 9p11.2     | . . .   | . . . | Sc                                 | Score=748 rs749 ID=COSN2 . . . . . |             |
| . . .  | 9q13       | . . .   | . . . | Sc                                 | Score=540 rs492 . . . . .          |             |
| ENST0. | 9q13       | . . .   | Sc    | Sc                                 | rs456 . . . . .                    |             |
| ENST0. | 9q21.11    | . . .   | . . . | Sc.                                | rs143 ID=COSN2 . . . . .           |             |
| ENST0. | 9q21.11    | . . .   | . . . | Sc.                                | rs377 . . . . .                    |             |
| ENST0. | 9q22.1     | . . .   | . . . | Score=22;l . . . . .               |                                    |             |
| ENST0. | 9q33.3     | . . .   | . . . | . . . . .                          |                                    |             |
| ENST0. | 9q33.3     | . . .   | . . . | Score=983 . . . . .                |                                    |             |
| . . .  | 10p12.2    | . . .   | . . . | Score=139 rs139 ID=COSN6 . . . . . |                                    |             |
| ENST0  | hsa-mir-60 | 10p12.2 | . . . | Score=475 . . . . .                |                                    |             |
| ENST0. | 10p11.22   | . . .   | . . . | Score=101 rs963 . . . . .          |                                    |             |
| ENST0. | 10p11.21   | . . .   | . . . | . . . . .                          |                                    |             |
| ENST0. | 10q11.22   | . . .   | . . . | Sc                                 | Score=922 rs694 . . . . .          |             |
| ENST0. | 10q22.3    | . . .   | . . . | Sc.                                | rs527 . . . . .                    | 1E-03       |
| ENST0. | 10q22.3    | . . .   | . . . | . . .                              | rs188 . . . . .                    | 6E-04       |
| . . .  | 10q22.3    | . . .   | . . . | Sc.                                | rs257 ID=COSN2 . . . . .           |             |
| ENST0. | 10q23.2    | . . .   | . . . | Sc.                                | rs312 . . . . .                    | 0.524 0.433 |
| ENST0. | 11p11.12   | . . .   | . . . | Sc.                                | . . . ID=COSN1 . . . . .           |             |
| ENST0. | 11p11.12   | . . .   | . . . | Sc.                                | . . . ID=COSN2 . . . . .           |             |
| . . .  | 11q13.2    | . . .   | . . . | . . .                              | Score=113 rs903 ID=COSN7 . . . . . |             |
| . . .  | 11q13.4    | . . .   | . . . | Sc.                                | rs187 ID=COSN2 . . . . .           |             |
| ENST0. | 11q13.5    | . . .   | . . . | Sc.                                | rs966 . . . . .                    |             |
| ENST0. | 11q13.5    | . . .   | . . . | . . .                              | Score=113 rs568 . . . . .          | 4E-04       |
| ENST0. | 11q24.2    | . . .   | . . . | . . . . .                          |                                    |             |
| ENST0. | 11q25      | . . .   | . . . | . . . . .                          |                                    |             |
| ENST0. | 12q13.13   | . . .   | . . . | Sc.                                | rs760 . . . . .                    |             |
| ENST0. | 12q13.2    | . . .   | . . . | . . .                              | ID=COSM1 . . . . .                 |             |
| ENST0. | 12q23.3    | . . .   | . . . | . . .                              | rs759 ID=COSN1 . . . . .           |             |
| ENST0. | 13q21.31   | . . .   | . . . | Sc.                                | rs200 . . . . .                    |             |
| ENST0. | 13q33.3    | . . .   | . . . | Sc.                                | rs151 ID=COSM2 . . . . .           | 4E-04       |
| ENST0. | 14q11.2    | . . .   | . . . | Sc.                                | rs744 ID=COSN2 . . . . .           |             |
| ENST0. | 14q11.2    | . . .   | . . . | Sc.                                | . . . . .                          |             |
| ENST0. | 14q11.2    | . . .   | . . . | Sc.                                | rs200 . . . . .                    |             |
| ENST0. | 14q11.2    | . . .   | . . . | Sc.                                | rs202 . . . . .                    |             |



|        |          |         |     |                           |         |       |       |
|--------|----------|---------|-----|---------------------------|---------|-------|-------|
| ENST0. | 14q11.2  | . .     | Sc. | rs770 ID=COSN2.           | . . . . |       |       |
| ENST0. | 14q23.1  | . . . . |     |                           |         |       |       |
| ENST0. | 14q24.3  | . . . . |     |                           |         |       |       |
| ENST0. | 14q32.33 | . .     | Sc. | ID=COSN2.                 | . . . . |       |       |
| . .    | 15q11.1  | . .     | Sc  | Score=217 rs620 ID=COSN2. | . . . . | 0.345 | 0.258 |
| ENST0. | 15q11.2  | . .     | Sc. |                           |         |       |       |
| ENST0. | 15q11.2  | . . . . |     |                           |         |       |       |
| ENST0. | 15q13.2  | . .     | Sc. | rs775.                    | . . . . |       |       |
| ENST0. | 15q13.2  | . .     | Sc  | Score=271 rs244 ID=COSN6. | . . . . | 0.026 | 0.192 |
| ENST0. | 15q13.2  | . .     | Sc  | Score=271 rs244 ID=COSN1. | . . . . | 0.167 | 0.485 |
| ENST0. | 15q13.3  | . .     | Sc. |                           |         |       |       |
| ENST0. | 15q13.3  | . .     | Sc. |                           |         |       |       |
| ENST0. | 15q21.1  | . .     | Sc. | rs620.                    | . . . . | 0.422 | 0.324 |
| ENST0. | 15q21.2  | . . . . |     |                           |         |       |       |
| ENST0. | 15q22.31 | . . . . |     |                           |         |       |       |
| ENST0. | 15q25.2  | . .     | Sc. |                           |         |       |       |
| . .    | 15q25.2  | . .     | Sc. | rs374.                    | . . . . | 0.446 | 0.327 |
| ENST0. | 15q25.2  | . .     | Sc. | rs970.                    | . . . . |       |       |
| ENST0. | 15q25.2  | . .     | Sc. | rs364.                    | . . . . |       | 8E-04 |
| ENST0. | 16p13.11 | . .     | Sc. | rs200.                    | . . . . |       |       |
| ENST0. | 16p13.11 | . .     | Sc. | rs201.                    | . . . . |       |       |
| ENST0. | 16p12.3  | . .     | Sc. | ID=COSN2.                 | . . . . |       |       |
| . .    | 16p12.2  | . .     | Sc. | rs566.                    | . . . . | 0.001 | 4E-04 |
| ENST0. | 16p11.2  | . .     | Sc. | rs561 ID=COSM4.           | . . . . |       |       |
| . .    | 16p11.2  | . .     | Sc  | Score=179 rs879.          | . . . . |       |       |
| . .    | 16q11.2  | . .     | . . | Score=117 rs431 ID=COSN1. | . . . . |       |       |
| . .    | 16q11.2  | . .     | . . | Score=114 rs434.          | . . . . |       |       |
| . .    | 16q11.2  | . .     | . . | Score=114 rs424.          | . . . . |       |       |
| . .    | 16q11.2  | . . . . |     |                           |         |       |       |
| . .    | 16q11.2  | . .     | . . | Score=989 rs879.          | . . . . |       |       |
| . .    | 16q11.2  | . .     | . . | Score=111 rs997.          | . . . . |       |       |
| . .    | 16q11.2  | . .     | . . | Score=122 rs432 ID=COSN2. | . . . . |       |       |
| . .    | 16q11.2  | . .     | . . | Score=112 rs932 ID=COSN1. | . . . . |       |       |
| . .    | 16q11.2  | . .     | . . | Score=112 rs438 ID=COSN1. | . . . . |       |       |
| . .    | 16q11.2  | . .     | . . | Score=112 rs429.          | . . . . |       |       |
| . .    | 16q11.2  | . .     | . . | rs401 ID=COSN1.           | . . . . |       |       |
| . .    | 16q11.2  | . .     | . . | Score=114.                | . . . . |       |       |
| . .    | 16q11.2  | . .     | . . | Score=114 rs720.          | . . . . |       |       |
| . .    | 16q11.2  | . .     | . . | Score=979 rs409.          | . . . . |       |       |
| . .    | 16q11.2  | . .     | . . | Score=979 rs424.          | . . . . |       |       |
| . .    | 16q11.2  | . .     | . . | Score=979.                | . . . . |       |       |
| ENST0. | 16q24.3  | . .     | Sc. | rs620.                    | . . . . |       |       |
| ENST0. | 17p11.2  | . .     | Sc. | rs254 ID=COSN4.           | . . . . |       |       |
| ENST0. | 17p11.2  | . .     | Sc. | rs712 ID=COSN2.           | . . . . |       |       |
| ENST0. | 17p11.2  | . .     | Sc. | rs712 ID=COSN2.           | . . . . |       |       |
| ENST0. | 17p11.2  | . .     | Sc. | rs784.                    | . . . . |       |       |
| . .    | 17p11.1  | . .     | . . | Score=113.                | . . . . |       |       |
| . .    | 17p11.1  | . .     | . . | Score=113 rs143.          | . . . . |       |       |
| . .    | 17p11.1  | . .     | . . | Score=113.                | . . . . |       |       |
| ENST0. | 17q12    | . .     | Sc. | rs620.                    | . . . . |       |       |
| ENST0. | 17q21.2  | . .     | Sc. | rs748 ID=COSM2.           | . . . . |       |       |
| ENST0. | 17q21.2  | . .     | . . | rs145 ID=COSN1.           | . . . . |       |       |
| ENST0. | 17q21.31 | . .     | Sc. |                           |         |       |       |
| ENST0. | 18p11.21 | . .     | Sc. | rs201 ID=COSN2.           | . . . . |       |       |

|        |          |     |               |               |  |       |       |
|--------|----------|-----|---------------|---------------|--|-------|-------|
| ENST0. | 18p11.21 | Sc. | rs373.        |               |  |       |       |
| ENST0. | 18q21.33 |     | rs752.        |               |  |       |       |
| ENST0. | 19p13.3  |     |               |               |  |       |       |
| ENST0. | 19q13.12 |     |               |               |  |       |       |
| .      | 19q13.12 | Sc  | Score=123     | rs764.        |  |       |       |
| .      | 19q13.12 | Sc  | Score=259.    |               |  |       |       |
| ENST0. | 19q13.31 | Sc. |               |               |  |       |       |
| ENST0. | 19q13.32 |     |               |               |  |       |       |
| ENST0. | 19q13.42 |     | rs349 ID=COSM |               |  |       |       |
| ENST0. | 19q13.42 |     | rs561 ID=COSM |               |  |       |       |
| ENST0. | 19q13.42 | Sc. | rs133 ID=COSN |               |  |       |       |
| ENST0. | 19q13.43 |     | rs375 ID=COSN |               |  |       |       |
| ENST0. | 20q11.22 |     | Score=507.    | ID=COSM       |  |       |       |
| ENST0. | 21p11.2  | Sc. | rs798 ID=COSN |               |  |       |       |
| .      | 21p11.1  | Sc  | Score=970     | rs201 ID=COSN |  |       |       |
| ENST0. | 22q11.1  | Sc. | rs375 ID=COSN |               |  |       |       |
| ENST0. | 22q11.1  | Sc. |               |               |  |       |       |
| ENST0. | 22q11.1  | Sc. | rs202 ID=COSN |               |  |       |       |
| ENST0. | 22q11.21 | Sc. |               |               |  |       |       |
| ENST0. | 22q11.21 | Sc. | rs622 ID=COSN |               |  |       |       |
| ENST0. | 22q11.21 | Sc. | rs201 ID=COSN |               |  | 0.114 | 0.24  |
| ENST0. | 22q11.23 | Sc. | rs622 ID=COSN |               |  |       |       |
| ENST0. | 22q12.2  | Sc. | rs367 ID=COSN |               |  |       |       |
| ENST0. | 22q13.2  | Sc. | rs360.        |               |  | 0.302 | 0.458 |
| ENST0. | 22q13.2  | Sc. |               |               |  |       |       |
| ENST0. | 22q13.31 |     |               |               |  |       |       |
| ENST0. | Xp11.22  |     |               |               |  |       |       |
| .      | Xq11.1   |     | Score=120.    |               |  |       |       |
| .      | Xq11.1   |     | Score=120.    | ID=COSN       |  |       |       |
| .      | Xq11.1   |     | Score=120     | rs752.        |  |       |       |
| .      | Xq11.1   |     | Score=120     | rs775.        |  |       |       |
| .      | Xq11.1   |     | Score=120.    |               |  |       |       |
| ENST0. | Xq13.1   | Sc. | rs104 ID=COSM |               |  |       |       |
| ENST0. | Xq13.1   |     |               |               |  |       |       |
| ENST0. | Xq13.1   |     |               |               |  |       |       |
| ENST0. | Xq27.1   | Sc. | rs142 ID=COSN |               |  |       |       |
| .      | Xq28     |     |               |               |  |       |       |
| ENST0. | 1p36.33  | Sc. | rs374 ID=COSN |               |  | 0.092 | 0.039 |
| ENST0. | 1p36.33  |     |               |               |  |       |       |
| ENST0. | 1p36.33  | Sc. | rs115.        |               |  |       | 0.007 |
| ENST0. | 1p36.33  |     |               |               |  |       |       |
| ENST0. | 1p36.33  |     | rs541.        |               |  |       | 2E-04 |
| ENST0. | 1p36.33  |     | rs768 ID=COSN |               |  |       |       |
| ENST0. | 1p36.33  |     |               |               |  |       |       |
| ENST0. | 1p36.33  | Sc. |               |               |  |       |       |
| ENST0. | 1p36.33  |     | rs780.        |               |  |       |       |
| ENST0. | 1p36.33  |     |               |               |  |       |       |
| ENST0. | 1p36.33  | Sc. | rs201.        |               |  | 0.001 | 2E-04 |
| ENST0. | 1p36.33  | Sc  | Sc            | rs746.        |  |       |       |
| ENST0. | 1p36.33  |     | Sc            | Score=229.    |  |       |       |
| ENST0. | 1p36.33  |     | Sc            | Score=161.    |  |       |       |
| ENST0. | 1p36.33  |     |               |               |  |       |       |
| ENST0. | 1p36.33  |     |               |               |  |       |       |



|        |         |        |        |   |                   |   |   |       |       |
|--------|---------|--------|--------|---|-------------------|---|---|-------|-------|
| ENST0. | 1p36.11 | . Scc. | rs776. | . | .                 | . | . | .     | .     |
| ENST0. | 1p36.11 | .      | .      | . | .                 | . | . | .     | .     |
| ENST0. | 1p36.11 | .      | .      | . | rs879 ID=COSM{Pa. | . | . | .     | .     |
| ENST0. | 1p36.11 | . Scc. | .      | . | .                 | . | . | .     | .     |
| ENST0. | 1p36.11 | .      | .      | . | rs100.            | . | . | .     | .     |
| ENST0. | 1p36.11 | . Scc. | .      | . | rs762.            | . | . | .     | .     |
| ENST0. | 1p36.11 | .      | .      | . | rs946.            | . | . | .     | .     |
| ENST0. | 1p36.11 | . Scc. | .      | . | .                 | . | . | .     | .     |
| ENST0. | 1p35.3  | .      | .      | . | ID=COSNz.         | . | . | .     | .     |
| ENST0. | 1p35.3  | .      | .      | . | .                 | . | . | .     | .     |
| ENST0. | 1p35.2  | .      | .      | . | rs759 ID=COSM{.   | . | . | .     | .     |
| ENST0. | 1p35.2  | .      | .      | . | rs923.            | . | . | .     | .     |
| ENST0. | 1p35.1  | .      | .      | . | .                 | . | . | .     | .     |
| ENST0. | 1p35.1  | .      | .      | . | .                 | . | . | .     | .     |
| .      | 1p35.1  | .      | .      | . | Score=625.        | . | . | .     | .     |
| ENST0. | 1p35.1  | .      | .      | . | Score=189.        | . | . | .     | .     |
| ENST0. | 1p34.3  | .      | .      | . | rs965.            | . | . | .     | .     |
| ENST0. | 1p34.3  | .      | .      | . | rs772.            | . | . | .     | .     |
| ENST0. | 1p34.3  | .      | .      | . | Score=196.        | . | . | .     | .     |
| ENST0. | 1p34.3  | .      | .      | . | rs181.            | . | . | 0.009 | 0.002 |
| ENST0. | 1p34.3  | .      | .      | . | Score=216.        | . | . | .     | .     |
| ENST0. | 1p34.3  | .      | .      | . | .                 | . | . | .     | .     |
| ENST0. | 1p34.3  | .      | .      | . | .                 | . | . | .     | .     |
| ENST0. | 1p34.3  | . Scc. | rs552. | . | .                 | . | . | .     | 4E-04 |
| ENST0. | 1p34.3  | .      | .      | . | .                 | . | . | .     | .     |
| ENST0. | 1p34.2  | . Scc. | .      | . | .                 | . | . | .     | .     |
| ENST0. | 1p34.2  | .      | .      | . | .                 | . | . | .     | .     |
| ENST0. | 1p34.2  | . Scc. | .      | . | .                 | . | . | .     | .     |
| ENST0. | 1p34.2  | .      | .      | . | rs909.            | . | . | .     | .     |
| ENST0. | 1p34.2  | .      | .      | . | .                 | . | . | .     | .     |
| ENST0. | 1p34.2  | .      | .      | . | rs117.            | . | . | .     | 0.01  |
| ENST0. | 1p34.2  | .      | .      | . | rs745.            | . | . | .     | .     |
| ENST0. | 1p34.2  | .      | .      | . | .                 | . | . | .     | .     |
| ENST0. | 1p34.1  | .      | .      | . | Score=976.        | . | . | .     | .     |
| ENST0. | 1p34.1  | .      | .      | . | .                 | . | . | .     | .     |
| ENST0. | 1p34.1  | .      | .      | . | .                 | . | . | .     | .     |
| ENST0. | 1p34.1  | .      | .      | . | rs729.            | . | . | 0.009 | 0.013 |
| ENST0. | 1p33    | .      | .      | . | .                 | . | . | .     | .     |
| ENST0. | 1p33    | . Scc. | rs550. | . | .                 | . | . | .     | 2E-04 |
| ENST0. | 1p33    | . Scc. | .      | . | .                 | . | . | .     | .     |
| ENST0. | 1p33    | .      | .      | . | .                 | . | . | .     | .     |
| ENST0. | 1p32.3  | .      | .      | . | Score=180 rs757.  | . | . | .     | .     |
| ENST0. | 1p32.3  | .      | .      | . | rs951.            | . | . | .     | .     |
| ENST0. | 1p32.3  | .      | .      | . | Score=240 rs775.  | . | . | .     | .     |
| ENST0. | 1p32.3  | . Scc. | .      | . | .                 | . | . | .     | .     |
| ENST0. | 1p32.3  | .      | .      | . | rs376.            | . | . | .     | .     |
| ENST0. | 1p32.2  | .      | .      | . | rs781 ID=COSM{.   | . | . | .     | .     |
| ENST0. | 1p32.2  | .      | .      | . | .                 | . | . | .     | .     |
| ENST0. | 1p31.3  | .      | .      | . | .                 | . | . | .     | .     |
| ENST0. | 1p31.3  | .      | .      | . | .                 | . | . | .     | .     |
| ENST0. | 1p31.1  | .      | .      | . | .                 | . | . | .     | .     |
| ENST0. | 1p31.1  | .      | .      | . | .                 | . | . | .     | .     |
| ENST0. | 1p31.1  | .      | .      | . | rs178.            | . | . | .     | .     |
| ENST0. | 1p31.1  | . Scc. | .      | . | .                 | . | . | .     | .     |

|        |        |   |     |   |                           |   |   |   |   |
|--------|--------|---|-----|---|---------------------------|---|---|---|---|
| ENST0. | 1p31.1 | . | .   | . | rs139 ID=COSMk.           | . | . | . | . |
| ENST0. | 1p22.3 | . | Sc. | . | rs763.                    | . | . | . | . |
| ENST0. | 1p22.3 | . | .   | . | .                         | . | . | . | . |
| ENST0. | 1p22.1 | . | .   | . | .                         | . | . | . | . |
| ENST0. | 1p22.1 | . | .   | . | .                         | . | . | . | . |
| ENST0. | 1p22.1 | . | .   | . | rs617 ID=COSMk no.        | . | . | . | . |
| ENST0. | 1p21.2 | . | .   | . | .                         | . | . | . | . |
| ENST0. | 1p21.1 | . | .   | . | .                         | . | . | . | . |
| ENST0. | 1p13.3 | . | .   | . | .                         | . | . | . | . |
| ENST0. | 1p13.3 | . | .   | . | rs936.                    | . | . | . | . |
| ENST0. | 1p13.3 | . | .   | . | Score=513 rs777.          | . | . | . | . |
| ENST0. | 1p13.3 | . | .   | . | .                         | . | . | . | . |
| ENST0. | 1p13.2 | . | .   | . | Score=852.                | . | . | . | . |
| ENST0. | 1p13.2 | . | .   | . | ID=COSMk.                 | . | . | . | . |
| ENST0. | 1p13.2 | . | .   | . | Score=472.                | . | . | . | . |
| ENST0. | 1p13.2 | . | Sc. | . | rs755 ID=COSMk.           | . | . | . | . |
| ENST0. | 1p13.2 | . | .   | . | .                         | . | . | . | . |
| ENST0. | 1p13.2 | . | .   | . | .                         | . | . | . | . |
| ENST0. | 1p13.2 | . | .   | . | .                         | . | . | . | . |
| ENST0. | 1p13.2 | . | .   | . | rs372.                    | . | . | . | . |
| ENST0. | 1p13.1 | . | .   | . | ID=COSN1.                 | . | . | . | . |
| ENST0. | 1p12   | . | .   | . | .                         | . | . | . | . |
| ENST0. | 1p12   | . | Sc. | . | .                         | . | . | . | . |
| ENST0. | 1p12   | . | .   | . | rs104.                    | . | . | . | . |
| ENST0. | 1p12   | . | .   | . | .                         | . | . | . | . |
| ENST0. | 1q21.1 | . | Sc. | . | .                         | . | . | . | . |
| ENST0. | 1q21.1 | . | Sc. | . | rs944 ID=COSN1.           | . | . | . | . |
| ENST0. | 1q21.1 | . | Sc. | . | rs406 ID=COSN2.           | . | . | . | . |
| ENST0. | 1q21.1 | . | Sc. | . | .                         | . | . | . | . |
| ENST0. | 1q21.1 | . | Sc. | . | rs781 ID=COSN1.           | . | . | . | . |
| ENST0. | 1q21.1 | . | Sc. | . | rs751.                    | . | . | . | . |
| .      | 1q21.1 | . | Sc. | . | .                         | . | . | . | . |
| ENST0. | 1q21.1 | . | .   | . | .                         | . | . | . | . |
| ENST0. | 1q21.1 | . | Sc. | . | .                         | . | . | . | . |
| ENST0. | 1q21.2 | . | Sc. | . | .                         | . | . | . | . |
| ENST0. | 1q21.2 | . | Sc. | . | .                         | . | . | . | . |
| ENST0. | 1q21.3 | . | .   | . | .                         | . | . | . | . |
| ENST0. | 1q21.3 | . | .   | . | .                         | . | . | . | . |
| ENST0. | 1q21.3 | . | Sc. | . | .                         | . | . | . | . |
| ENST0. | 1q21.3 | . | .   | . | .                         | . | . | . | . |
| ENST0. | 1q21.3 | . | .   | . | rs947.                    | . | . | . | . |
| ENST0. | 1q21.3 | . | .   | . | .                         | . | . | . | . |
| ENST0. | 1q21.3 | . | .   | . | .                         | . | . | . | . |
| ENST0. | 1q21.3 | . | .   | . | rs770 ID=COSMk.           | . | . | . | . |
| ENST0. | 1q21.3 | . | Sc. | . | .                         | . | . | . | . |
| ENST0. | 1q22   | . | .   | . | .                         | . | . | . | . |
| ENST0. | 1q22   | . | .   | . | .                         | . | . | . | . |
| ENST0. | 1q22   | . | .   | . | .                         | . | . | . | . |
| ENST0. | 1q22   | . | .   | . | rs932.                    | . | . | . | . |
| ENST0. | 1q23.1 | . | .   | . | .                         | . | . | . | . |
| ENST0. | 1q23.1 | . | .   | . | rs371.                    | . | . | . | . |
| .      | 1q23.1 | . | .   | . | Score=362 rs200 ID=COSNk. | . | . | . | . |
| ENST0. | 1q23.1 | . | .   | . | rs773.                    | . | . | . | . |
| ENST0. | 1q23.2 | . | .   | . | rs762.                    | . | . | . | . |



|        |        |     |                           |  |             |
|--------|--------|-----|---------------------------|--|-------------|
| ENST0. | 1q42.2 | Sc. | rs100 ID=COSM.            |  |             |
| ENST0. | 1q43   |     | rs367 ID=COSN1.           |  | 0.001       |
| ENST0. | 1q43   | Sc. |                           |  |             |
| ENST0. | 1q44   |     |                           |  |             |
|        | 1q44   |     | Score=144 rs100.          |  |             |
| ENST0. | 1q44   |     | rs182.                    |  | 0.001       |
| ENST0. | 1q44   |     | rs758.                    |  |             |
| ENST0. | 2p25.3 |     | rs372.                    |  |             |
| ENST0. | 2p25.3 |     | rs777.                    |  |             |
| ENST0. | 2p25.3 |     |                           |  |             |
| ENST0. | 2p25.3 |     | rs569.                    |  | 0.001 2E-04 |
|        | 2p25.1 |     |                           |  |             |
| ENST0. | 2p25.1 |     | rs749.                    |  |             |
| ENST0. | 2p25.1 |     | rs369.                    |  |             |
| ENST0. | 2p25.1 |     | Score=247 rs965.          |  |             |
| ENST0. | 2p24.2 | Sc. | Score=644.                |  |             |
| ENST0. | 2p24.2 |     | rs376.                    |  | 2E-04       |
| ENST0. | 2p24.2 | Sc. | rs368.                    |  |             |
| ENST0. | 2p24.2 |     | rs755.                    |  |             |
| ENST0. | 2p24.1 | Sc. | ID=COSM.                  |  |             |
| ENST0. | 2p23.3 |     | rs565.                    |  | 2E-04       |
| ENST0. | 2p23.3 | Sc. | rs773.                    |  |             |
| ENST0. | 2p23.3 |     | rs147.                    |  | 2E-04       |
| ENST0. | 2p23.3 |     |                           |  |             |
| ENST0. | 2p23.3 |     |                           |  |             |
| ENST0. | 2p23.1 |     |                           |  |             |
| ENST0. | 2p22.3 |     | rs766 ID=COSM.            |  |             |
| ENST0. | 2p22.3 |     | Score=365 rs104.          |  |             |
| ENST0. | 2p22.3 |     | Score=646.                |  |             |
| ENST0. | 2p22.2 |     |                           |  |             |
| ENST0. | 2p22.1 |     | Score=270 rs772 ID=COSN1. |  |             |
| ENST0. | 2p21   |     |                           |  |             |
| ENST0. | 2p16.3 |     |                           |  |             |
| ENST0. | 2p16.3 |     |                           |  |             |
| ENST0. | 2p16.2 |     |                           |  |             |
| ENST0. | 2p16.2 | Sc. |                           |  |             |
| ENST0. | 2p16.1 | Sc. |                           |  |             |
| ENST0. | 2p16.1 |     | Score=324 rs778 ID=COSN1. |  |             |
| ENST0. | 2p16.1 |     | rs760.                    |  |             |
| ENST0. | 2p16.1 | Sc. |                           |  |             |
| ENST0. | 2p15   |     |                           |  |             |
| ENST0. | 2p14   |     |                           |  |             |
| ENST0. | 2p14   |     |                           |  |             |
| ENST0. | 2p13.3 |     | ID=COSM.                  |  |             |
| ENST0. | 2p13.3 |     |                           |  |             |
| ENST0. | 2p13.3 |     |                           |  |             |
| ENST0. | 2p13.3 |     |                           |  |             |
| ENST0. | 2p13.2 |     |                           |  |             |
| ENST0. | 2p12   |     | rs767 ID=COSM.            |  |             |
| ENST0. | 2p11.2 |     |                           |  |             |
| ENST0. | 2p11.2 |     | rs188.                    |  | 2E-04       |
| ENST0. | 2p11.2 |     |                           |  |             |
| ENST0. | 2p11.2 |     |                           |  |             |

|        |        |   |     |     |                           |   |   |   |       |       |   |
|--------|--------|---|-----|-----|---------------------------|---|---|---|-------|-------|---|
| ENST0. | 2p11.2 | . | .   | .   | .                         | . | . | . | .     | .     | . |
| ENST0. | 2p11.2 | . | .   | Sc. | .                         | . | . | . | .     | .     | . |
| ENST0. | 2p11.2 | . | .   | Sc. | .                         | . | . | . | .     | .     | . |
| ENST0. | 2p11.2 | . | .   | Sc. | rs191 ID=COSN2.           | . | . | . | .     | 0.004 | . |
| .      | 2p11.2 | . | .   | Sc. | rs777.                    | . | . | . | .     | .     | . |
| .      | 2p11.2 | . | .   | Sc  | Score=221 rs292.          | . | . | . | .     | .     | . |
| ENST0. | 2p11.2 | . | .   | Sc. | rs376.                    | . | . | . | .     | .     | . |
| ENST0. | 2p11.2 | . | .   | Sc. | .                         | . | . | . | .     | .     | . |
| .      | 2p11.2 | . | .   | Sc. | .                         | . | . | . | .     | .     | . |
| .      | 2p11.1 | . | .   | Sc  | Score=231 rs868 ID=COSN1. | . | . | . | .     | .     | . |
| .      | 2p11.1 | . | .   | Sc. | rs375 ID=COSN2.           | . | . | . | .     | .     | . |
| ENST0. | 2p11.1 | . | .   | Sc. | rs121 ID=COSN1.           | . | . | . | .     | .     | . |
| ENST0. | 2q11.1 | . | .   | Sc. | rs293.                    | . | . | . | .     | 2E-04 | . |
| ENST0. | 2q11.1 | . | .   | Sc. | .                         | . | . | . | .     | .     | . |
| ENST0. | 2q11.1 | . | Sc. | .   | rs778.                    | . | . | . | .     | .     | . |
| ENST0. | 2q11.2 | . | .   | .   | .                         | . | . | . | .     | .     | . |
| ENST0. | 2q11.2 | . | .   | .   | Score=255 rs570.          | . | . | . | .     | .     | . |
| ENST0. | 2q11.2 | . | .   | .   | .                         | . | . | . | .     | .     | . |
| ENST0. | 2q11.2 | . | .   | Sc. | rs557.                    | . | . | . | 0.001 | 2E-04 | . |
| ENST0. | 2q11.2 | . | .   | Sc. | .                         | . | . | . | .     | .     | . |
| ENST0. | 2q11.2 | . | Sc. | .   | .                         | . | . | . | .     | .     | . |
| ENST0. | 2q11.2 | . | .   | .   | rs768 ID=COSM1.           | . | . | . | .     | .     | . |
| ENST0. | 2q12.1 | . | .   | .   | .                         | . | . | . | .     | .     | . |
| ENST0. | 2q12.1 | . | .   | .   | rs751.                    | . | . | . | .     | .     | . |
| ENST0. | 2q12.2 | . | .   | Sc. | rs201.                    | . | . | . | .     | .     | . |
| ENST0. | 2q13   | . | .   | .   | rs758.                    | . | . | . | .     | .     | . |
| ENST0. | 2q13   | . | .   | .   | .                         | . | . | . | .     | .     | . |
| .      | 2q13   | . | .   | .   | .                         | . | . | . | .     | .     | . |
| ENST0. | 2q13   | . | .   | .   | .                         | . | . | . | .     | .     | . |
| ENST0. | 2q14.1 | . | .   | Sc. | ID=COSN1.                 | . | . | . | .     | .     | . |
| ENST0. | 2q14.1 | . | .   | .   | .                         | . | . | . | .     | .     | . |
| ENST0. | 2q14.2 | . | .   | .   | rs764.                    | . | . | . | .     | .     | . |
| ENST0. | 2q14.3 | . | .   | .   | .                         | . | . | . | .     | .     | . |
| ENST0. | 2q14.3 | . | .   | .   | .                         | . | . | . | .     | .     | . |
| ENST0. | 2q21.1 | . | .   | Sc. | rs781.                    | . | . | . | .     | .     | . |
| ENST0. | 2q21.1 | . | .   | Sc. | rs134 ID=COSN1.           | . | . | . | .     | .     | . |
| ENST0. | 2q21.2 | . | .   | Sc. | rs182.                    | . | . | . | .     | 8E-04 | . |
| ENST0. | 2q21.2 | . | .   | .   | .                         | . | . | . | .     | .     | . |
| ENST0. | 2q21.2 | . | .   | .   | Score=379.                | . | . | . | .     | .     | . |
| ENST0. | 2q22.1 | . | .   | .   | .                         | . | . | . | .     | .     | . |
| ENST0. | 2q23.3 | . | .   | .   | .                         | . | . | . | .     | .     | . |
| ENST0. | 2q23.3 | . | .   | .   | .                         | . | . | . | .     | .     | . |
| ENST0. | 2q23.3 | . | .   | .   | .                         | . | . | . | .     | .     | . |
| ENST0. | 2q23.3 | . | .   | .   | rs101.                    | . | . | . | .     | .     | . |
| ENST0. | 2q23.3 | . | .   | .   | Score=216 rs985.          | . | . | . | .     | .     | . |
| ENST0. | 2q24.2 | . | .   | .   | rs200 ID=COSM1.           | . | . | . | .     | .     | . |
| ENST0. | 2q24.2 | . | Sc. | .   | rs372.                    | . | . | . | .     | .     | . |
| ENST0. | 2q24.2 | . | .   | .   | .                         | . | . | . | .     | .     | . |
| ENST0. | 2q24.2 | . | .   | .   | rs102.                    | . | . | . | .     | .     | . |
| ENST0. | 2q24.3 | . | .   | .   | .                         | . | . | . | .     | .     | . |
| ENST0. | 2q31.1 | . | .   | .   | Score=586.                | . | . | . | .     | .     | . |
| ENST0. | 2q31.1 | . | .   | .   | .                         | . | . | . | .     | .     | . |
| ENST0. | 2q31.1 | . | .   | .   | .                         | . | . | . | .     | .     | . |
| ENST0. | 2q31.1 | . | .   | .   | rs921.                    | . | . | . | .     | .     | . |







|        |            |         |     |   |            |                    |   |   |   |   |       |       |
|--------|------------|---------|-----|---|------------|--------------------|---|---|---|---|-------|-------|
| ENST0. | 3p21.1     | .       | .   | . | Score=160. | .                  | . | . | . | . | .     | .     |
| ENST0. | 3p21.1     | .       | .   | . | .          | .                  | . | . | . | . | .     | .     |
| ENST0. | 3p21.1     | .       | .   | . | .          | rs962.             | . | . | . | . | .     | .     |
| ENST0. | 3p21.1     | .       | .   | . | .          | .                  | . | . | . | . | .     | .     |
| ENST0. | 3p21.1     | .       | .   | . | .          | .                  | . | . | . | . | .     | .     |
| ENST0. | 3p21.1     | .       | Sc. | . | .          | .                  | . | . | . | . | .     | .     |
| ENST0. | 3p21.1     | .       | .   | . | .          | rs200 ID=COSN1.    | . | . | . | . | .     | .     |
| ENST0. | 3p14.3     | .       | .   | . | .          | Score=294 rs985.   | . | . | . | . | .     | .     |
| ENST0. | 3p14.3     | .       | .   | . | .          | Score=294 rs104.   | . | . | . | . | .     | .     |
| ENST0. | 3p14.3     | .       | .   | . | .          | .                  | . | . | . | . | .     | .     |
| ENST0. | 3p14.3     | .       | .   | . | .          | .                  | . | . | . | . | .     | .     |
| ENST0. | 3p14.3     | .       | .   | . | .          | .                  | . | . | . | . | .     | .     |
| ENST0. | 3p14.3     | .       | .   | . | .          | .                  | . | . | . | . | .     | .     |
| ENST0. | 3p14.1     | .       | .   | . | .          | rs745.             | . | . | . | . | .     | .     |
| ENST0. | 3p14.1     | .       | .   | . | .          | .                  | . | . | . | . | .     | .     |
| ENST0. | 3p13       | .       | .   | . | .          | .                  | . | . | . | . | .     | .     |
| ENST0. | 3p12.3     | .       | Sc. | . | .          | rs779 ID=COSMk.    | . | . | . | . | .     | .     |
| ENST0. | 3q11.2     | .       | .   | . | .          | .                  | . | . | . | . | .     | .     |
| .      | 3q13.11    | .       | .   | . | .          | .                  | . | . | . | . | .     | .     |
| ENST0. | 3q13.13    | .       | .   | . | .          | .                  | . | . | . | . | .     | .     |
| ENST0. | 3q13.13    | .       | .   | . | .          | .                  | . | . | . | . | .     | .     |
| ENST0. | 3q13.2     | .       | .   | . | .          | .                  | . | . | . | . | .     | .     |
| ENST0. | 3q13.33    | .       | Sc. | . | .          | .                  | . | . | . | . | .     | .     |
| ENST0. | 3q13.33    | .       | .   | . | .          | .                  | . | . | . | . | .     | .     |
| ENST0. | 3q13.33    | .       | .   | . | .          | rs368.             | . | . | . | . | .     | .     |
| ENST0. | 3q21.1     | .       | .   | . | .          | rs100 ID=COSN1.    | . | . | . | . | .     | .     |
| ENST0. | 3q21.2     | .       | Sc. | . | .          | rs146.             | . | . | . | . | .     | .     |
| ENST0. | 3q21.3     | .       | .   | . | .          | .                  | . | . | . | . | .     | .     |
| ENST0. | 3q21.3     | .       | .   | . | .          | rs552.             | . | . | . | . | 0.001 | 4E-04 |
| ENST0. | 3q21.3     | .       | Sc. | . | .          | rs751.             | . | . | . | . | .     | .     |
| ENST0. | 3q21.3     | .       | .   | . | .          | .                  | . | . | . | . | .     | .     |
| ENST0. | 3q21.3     | .       | Sc. | . | .          | rs563.             | . | . | . | . | .     | .     |
| ENST0. | 3q21.3     | .       | Sc. | . | .          | .                  | . | . | . | . | .     | .     |
| ENST0. | 3q22.1     | .       | .   | . | .          | .                  | . | . | . | . | .     | .     |
| ENST0. | 3q22.1     | .       | .   | . | .          | .                  | . | . | . | . | .     | .     |
| ENST0. | 3q23       | .       | Sc. | . | .          | .                  | . | . | . | . | .     | .     |
| ENST0. | 3q23       | .       | Sc. | . | .          | .                  | . | . | . | . | .     | .     |
| ENST0. | 3q23       | .       | Sc. | . | .          | rs140 ID=COSMk.    | . | . | . | . | 8E-04 | .     |
| ENST0. | 3q23       | .       | .   | . | .          | .                  | . | . | . | . | .     | .     |
| ENST0. | 3q23       | .       | .   | . | .          | .                  | . | . | . | . | .     | .     |
| ENST0. | 3q23       | .       | .   | . | .          | rs768 ID=COSN1Lik. | . | . | . | . | 0.002 | 0.048 |
| ENST0. | 3q23       | .       | .   | . | .          | rs770.             | . | . | . | . | .     | .     |
| ENST0. | 3q24       | .       | .   | . | .          | ID=COSN2.          | . | . | . | . | .     | .     |
| ENST0. | 3q25.1     | .       | .   | . | .          | .                  | . | . | . | . | .     | .     |
| ENST0. | 3q25.1     | .       | .   | . | .          | rs760.             | . | . | . | . | .     | .     |
| ENST0. | 3q25.32    | .       | .   | . | .          | .                  | . | . | . | . | .     | .     |
| ENST0  | hsa-mir-16 | 3q25.33 | Sc. | . | .          | .                  | . | . | . | . | .     | .     |
| ENST0. | 3q26.1     | .       | .   | . | .          | .                  | . | . | . | . | .     | .     |
| .      | 3q26.2     | .       | .   | . | .          | Score=109.         | . | . | . | . | .     | .     |
| ENST0. | 3q26.2     | .       | Sc. | . | .          | rs538.             | . | . | . | . | 2E-04 | .     |
| .      | 3q26.32    | .       | .   | . | .          | Score=115 rs936.   | . | . | . | . | .     | .     |
| ENST0. | 3q26.32    | .       | Sc. | . | .          | ID=COSNε.          | . | . | . | . | .     | .     |
| ENST0. | 3q26.33    | .       | Sc. | . | .          | rs765.             | . | . | . | . | .     | .     |
| ENST0. | 3q26.33    | .       | .   | . | .          | rs571 ID=COSN2.    | . | . | . | . | 0.001 | 2E-04 |



|        |         |   |     |    |                           |           |   |       |       |
|--------|---------|---|-----|----|---------------------------|-----------|---|-------|-------|
| ENST0. | 4q13.3  | . | .   | .  | Score=24;rs119 ID=COSN1.  | .         | . | 0.126 | 0.126 |
| ENST0. | 4q13.3  | . | .   | .  | .                         | .         | . | .     | .     |
| ENST0. | 4q21.1  | . | .   | .  | rs369.                    | .         | . | .     | .     |
| ENST0. | 4q21.1  | . | .   | .  | .                         | .         | . | .     | .     |
| ENST0. | 4q21.1  | . | .   | .  | rs760.                    | .         | . | .     | .     |
| ENST0. | 4q21.21 | . | Sc. | .  | .                         | .         | . | .     | .     |
| ENST0. | 4q21.22 | . | .   | .  | .                         | .         | . | .     | .     |
| ENST0. | 4q21.23 | . | .   | .  | rs886.                    | .         | . | .     | .     |
| ENST0. | 4q22.1  | . | Sc. | .  | .                         | .         | . | .     | .     |
| ENST0. | 4q24    | . | Sc. | .  | .                         | .         | . | .     | .     |
| ENST0. | 4q24    | . | .   | .  | .                         | .         | . | .     | .     |
| ENST0. | 4q24    | . | Sc. | .  | rs371.                    | .         | . | .     | .     |
| ENST0. | 4q25    | . | Sc. | .  | ID=COSMk.                 | .         | . | .     | .     |
| ENST0. | 4q25    | . | Sc. | .  | .                         | .         | . | .     | .     |
| ENST0. | 4q26    | . | Sc. | .  | .                         | .         | . | .     | .     |
| ENST0. | 4q26    | . | Sc. | .  | .                         | .         | . | .     | .     |
| ENST0. | 4q26    | . | Sc. | .  | .                         | .         | . | .     | .     |
| ENST0. | 4q27    | . | .   | .  | .                         | .         | . | .     | .     |
| ENST0. | 4q28.1  | . | .   | .  | rs774.                    | .         | . | .     | .     |
| ENST0. | 4q28.2  | . | .   | .  | .                         | .         | . | .     | .     |
| ENST0. | 4q28.2  | . | .   | .  | rs774.                    | .         | . | .     | .     |
| .      | 4q28.3  | . | .   | Sc | Score=105.                | ID=COSNz. | . | .     | .     |
| ENST0. | 4q28.3  | . | .   | .  | .                         | .         | . | .     | .     |
| ENST0. | 4q31.21 | . | Sc. | .  | .                         | .         | . | .     | .     |
| ENST0. | 4q31.21 | . | .   | .  | ID=COSMk.                 | .         | . | .     | .     |
| ENST0. | 4q31.21 | . | .   | .  | .                         | .         | . | .     | .     |
| ENST0. | 4q31.21 | . | Sc. | .  | .                         | .         | . | .     | .     |
| ENST0. | 4q31.3  | . | .   | .  | Score=116 rs866.          | .         | . | .     | .     |
| ENST0. | 4q32.3  | . | .   | Sc | Score=159 rs409 ID=COSN€. | .         | . | .     | .     |
| ENST0. | 4q34.1  | . | .   | .  | Score=403.                | .         | . | .     | .     |
| ENST0. | 4q35.1  | . | Sc. | .  | .                         | .         | . | .     | .     |
| ENST0. | 4q35.1  | . | .   | .  | rs942.                    | .         | . | .     | .     |
| ENST0. | 4q35.1  | . | .   | .  | ID=COSMk.                 | .         | . | .     | .     |
| ENST0. | 4q35.2  | . | .   | .  | rs778.                    | .         | . | .     | .     |
| ENST0. | 5p15.33 | . | Sc. | .  | .                         | .         | . | .     | .     |
| ENST0. | 5p15.33 | . | .   | .  | .                         | .         | . | .     | .     |
| ENST0. | 5p15.33 | . | Sc. | .  | rs412 ID=COSN1.           | .         | . | .     | .     |
| ENST0. | 5p15.33 | . | .   | .  | rs100 ID=COSN1.           | .         | . | .     | .     |
| ENST0. | 5p15.33 | . | .   | .  | Score=198.                | .         | . | .     | .     |
| .      | 5p15.33 | . | .   | .  | Score=590 rs903.          | .         | . | .     | .     |
| ENST0. | 5p15.32 | . | .   | .  | rs749.                    | .         | . | .     | .     |
| ENST0. | 5p15.31 | . | Sc. | .  | .                         | .         | . | .     | .     |
| ENST0. | 5p15.31 | . | .   | .  | ID=COSMk.                 | .         | . | .     | .     |
| ENST0. | 5p15.2  | . | Sc. | .  | rs149 ID=COSMz.           | .         | . | .     | 2E-04 |
| ENST0. | 5p15.2  | . | .   | .  | Score=245 rs655.          | Be.       | . | 0.548 | 0.261 |
| ENST0. | 5p15.2  | . | .   | .  | rs914.                    | .         | . | .     | .     |
| ENST0. | 5p15.2  | . | .   | .  | rs766.                    | .         | . | .     | .     |
| ENST0. | 5p13.3  | . | Sc. | .  | rs925.                    | .         | . | .     | .     |
| ENST0. | 5p13.3  | . | .   | .  | rs569.                    | .         | . | .     | 2E-04 |
| ENST0. | 5p13.2  | . | .   | Sc | Score=142 rs879.          | .         | . | .     | .     |
| ENST0. | 5p13.2  | . | .   | Sc | Score=142 rs976 ID=COSNz. | .         | . | .     | .     |
| ENST0. | 5p13.2  | . | .   | Sc | Score=215 rs976.          | .         | . | .     | .     |
| ENST0. | 5p13.1  | . | .   | .  | .                         | .         | . | .     | .     |
| ENST0. | 5p13.1  | . | Sc. | .  | .                         | .         | . | .     | .     |

|        |        |   |     |   |                  |   |   |   |   |   |             |
|--------|--------|---|-----|---|------------------|---|---|---|---|---|-------------|
| ENST0. | 5p13.1 | . | .   | . | .                | . | . | . | . | . | .           |
| ENST0. | 5p12   | . | .   | . | .                | . | . | . | . | . | .           |
| .      | 5q11.1 | . | .   | . | Score=122.       | . | . | . | . | . | .           |
| .      | 5q11.1 | . | .   | . | Score=122 rs432. | . | . | . | . | . | .           |
| .      | 5q11.1 | . | .   | . | Score=122.       | . | . | . | . | . | .           |
| ENST0. | 5q11.2 | . | .   | . | rs200.           | . | . | . | . | . | .           |
| ENST0. | 5q12.1 | . | Sc. | . | .                | . | . | . | . | . | .           |
| .      | 5q12.1 | . | Sc. | . | rs558.           | . | . | . | . | . | 2E-04       |
| ENST0. | 5q12.3 | . | Sc. | . | .                | . | . | . | . | . | .           |
| ENST0. | 5q12.3 | . | .   | . | rs567.           | . | . | . | . | . | 6E-04       |
| ENST0. | 5q12.3 | . | Sc. | . | .                | . | . | . | . | . | .           |
| ENST0. | 5q12.3 | . | Sc. | . | rs201.           | . | . | . | . | . | 0.001       |
| ENST0. | 5q13.1 | . | .   | . | .                | . | . | . | . | . | .           |
| ENST0. | 5q13.2 | . | .   | . | Score=175.       | . | . | . | . | . | .           |
| ENST0. | 5q13.2 | . | Sc. | . | .                | . | . | . | . | . | .           |
| ENST0. | 5q13.2 | . | .   | . | .                | . | . | . | . | . | .           |
| ENST0. | 5q13.3 | . | .   | . | Score=101.       | . | . | . | . | . | .           |
| ENST0. | 5q14.1 | . | .   | . | .                | . | . | . | . | . | .           |
| ENST0. | 5q14.1 | . | .   | . | .                | . | . | . | . | . | .           |
| ENST0. | 5q14.2 | . | Sc. | . | .                | . | . | . | . | . | .           |
| ENST0. | 5q14.3 | . | .   | . | rs371 ID=COSN2.  | . | . | . | . | . | .           |
| .      | 5q14.3 | . | .   | . | Score=432 rs781. | . | . | . | . | . | .           |
| ENST0. | 5q14.3 | . | .   | . | .                | . | . | . | . | . | .           |
| ENST0. | 5q15   | . | .   | . | .                | . | . | . | . | . | .           |
| ENST0. | 5q15   | . | .   | . | rs763 ID=COSM4.  | . | . | . | . | . | .           |
| ENST0. | 5q21.1 | . | Sc. | . | .                | . | . | . | . | . | .           |
| ENST0. | 5q21.1 | . | Sc. | . | .                | . | . | . | . | . | .           |
| ENST0. | 5q21.1 | . | .   | . | rs111.           | . | . | . | . | . | 8E-04       |
| ENST0. | 5q22.1 | . | .   | . | .                | . | . | . | . | . | .           |
| ENST0. | 5q22.2 | . | .   | . | .                | . | . | . | . | . | .           |
| ENST0. | 5q23.1 | . | .   | . | .                | . | . | . | . | . | .           |
| ENST0. | 5q23.1 | . | .   | . | .                | . | . | . | . | . | .           |
| ENST0. | 5q31.1 | . | Sc. | . | rs934.           | . | . | . | . | . | .           |
| ENST0. | 5q31.1 | . | .   | . | .                | . | . | . | . | . | .           |
| ENST0. | 5q31.1 | . | Sc. | . | rs746.           | . | . | . | . | . | .           |
| .      | 5q31.1 | . | .   | . | .                | . | . | . | . | . | .           |
| ENST0. | 5q31.1 | . | .   | . | rs747.           | . | . | . | . | . | .           |
| ENST0. | 5q31.2 | . | .   | . | rs766 ID=COSM1.  | . | . | . | . | . | .           |
| ENST0. | 5q31.2 | . | .   | . | .                | . | . | . | . | . | .           |
| ENST0. | 5q31.2 | . | .   | . | Score=384.       | . | . | . | . | . | .           |
| ENST0. | 5q31.2 | . | .   | . | Score=384 rs772. | . | . | . | . | . | .           |
| ENST0. | 5q31.3 | . | Sc. | . | .                | . | . | . | . | . | .           |
| ENST0. | 5q31.3 | . | Sc. | . | .                | . | . | . | . | . | .           |
| ENST0. | 5q31.3 | . | .   | . | ID=COSM1.        | . | . | . | . | . | .           |
| ENST0. | 5q31.3 | . | Sc. | . | rs782 ID=COSM1.  | . | . | . | . | . | .           |
| ENST0. | 5q31.3 | . | Sc. | . | ID=COSM1.        | . | . | . | . | . | .           |
| ENST0. | 5q31.3 | . | Sc. | . | .                | . | . | . | . | . | .           |
| ENST0. | 5q31.3 | . | .   | . | rs981.           | . | . | . | . | . | .           |
| ENST0. | 5q31.3 | . | Sc. | . | rs544 ID=COSM1.  | . | . | . | . | . | 0.002       |
| ENST0. | 5q31.3 | . | .   | . | rs376 ID=COSM1.  | . | . | . | . | . | .           |
| ENST0. | 5q31.3 | . | Sc. | . | rs771.           | . | . | . | . | . | .           |
| ENST0. | 5q31.3 | . | Sc. | . | rs201 ID=COSM1.  | . | . | . | . | . | 0.004 8E-04 |

|        |         |   |    |     |                           |        |   |   |       |       |   |
|--------|---------|---|----|-----|---------------------------|--------|---|---|-------|-------|---|
| ENST0. | 5q32    | . | .  | .   | Score=216 rs100.          | .      | . | . | .     | .     | . |
| ENST0. | 5q32    | . | .  | .   | .                         | .      | . | . | .     | .     | . |
| ENST0. | 5q32    | . | .  | .   | .                         | .      | . | . | .     | .     | . |
| ENST0. | 5q33.1  | . | .  | .   | .                         | .      | . | . | .     | .     | . |
| ENST0. | 5q33.1  | . | Sc | cc. | .                         | .      | . | . | .     | .     | . |
| ENST0. | 5q33.3  | . | .  | .   | rs549.                    | .      | . | . | 0.002 | 4E-04 | . |
| ENST0. | 5q33.3  | . | .  | .   | rs561.                    | .      | . | . | .     | 2E-04 | . |
| ENST0. | 5q34    | . | Sc | c.  | .                         | .      | . | . | .     | .     | . |
| ENST0. | 5q34    | . | .  | .   | .                         | .      | . | . | .     | .     | . |
| ENST0. | 5q34    | . | .  | .   | rs149.                    | .      | . | . | .     | .     | . |
| ENST0. | 5q34    | . | .  | .   | rs757 ID=COSM.            | .      | . | . | .     | .     | . |
| ENST0. | 5q34    | . | .  | .   | .                         | .      | . | . | .     | .     | . |
| ENST0. | 5q35.1  | . | .  | .   | .                         | .      | . | . | .     | .     | . |
| ENST0. | 5q35.1  | . | .  | .   | rs182.                    | .      | . | . | .     | 2E-04 | . |
| ENST0. | 5q35.1  | . | .  | .   | .                         | .      | . | . | .     | .     | . |
| ENST0. | 5q35.2  | . | Sc | c.  | .                         | .      | . | . | .     | .     | . |
| ENST0. | 5q35.2  | . | .  | .   | .                         | .      | . | . | .     | .     | . |
| ENST0. | 5q35.2  | . | .  | .   | rs455.                    | .      | . | . | .     | 0.003 | . |
| ENST0. | 5q35.2  | . | Sc | c.  | rs558.                    | .      | . | . | .     | 4E-04 | . |
| ENST0. | 5q35.3  | . | .  | Sc  | c.                        | .      | . | . | .     | .     | . |
| ENST0. | 5q35.3  | . | .  | Sc  | c.                        | .      | . | . | .     | .     | . |
| ENST0. | 5q35.3  | . | .  | .   | .                         | .      | . | . | .     | .     | . |
| ENST0. | 5q35.3  | . | .  | Sc  | c.                        | rs102. | . | . | .     | .     | . |
| ENST0. | 5q35.3  | . | Sc | c.  | Score=22;l.               | .      | . | . | .     | .     | . |
| ENST0. | 5q35.3  | . | .  | .   | Score=248.                | .      | . | . | .     | .     | . |
| ENST0. | 6p25.1  | . | .  | .   | rs765.                    | .      | . | . | .     | .     | . |
| ENST0. | 6p25.1  | . | .  | .   | Score=256 rs102.          | .      | . | . | .     | .     | . |
| ENST0. | 6p24.3  | . | .  | .   | rs186.                    | .      | . | . | .     | 0.002 | . |
| ENST0. | 6p24.3  | . | .  | Sc  | c.                        | .      | . | . | .     | .     | . |
| ENST0. | 6p24.3  | . | .  | .   | rs200.                    | .      | . | . | .     | .     | . |
| ENST0. | 6p24.3  | . | .  | .   | .                         | .      | . | . | .     | .     | . |
| ENST0. | 6p24.3  | . | .  | .   | rs369 ID=COSN1.           | .      | . | . | .     | .     | . |
| ENST0. | 6p24.1  | . | .  | .   | rs746.                    | .      | . | . | .     | .     | . |
| ENST0. | 6p22.3  | . | .  | .   | rs767.                    | .      | . | . | .     | .     | . |
| ENST0. | 6p22.3  | . | .  | .   | .                         | .      | . | . | .     | .     | . |
| .      | 6p22.3  | . | .  | Sc  | c.                        | .      | . | . | .     | .     | . |
| ENST0. | 6p22.3  | . | .  | Sc  | c.                        | .      | . | . | .     | .     | . |
| ENST0. | 6p22.2  | . | .  | Sc  | c.                        | .      | . | . | .     | .     | . |
| ENST0. | 6p22.1  | . | .  | .   | .                         | .      | . | . | .     | .     | . |
| .      | 6p22.1  | . | .  | .   | .                         | .      | . | . | .     | .     | . |
| ENST0. | 6p22.1  | . | .  | .   | Score=205.                | .      | . | . | .     | .     | . |
| ENST0. | 6p22.1  | . | .  | .   | .                         | .      | . | . | .     | .     | . |
| ENST0. | 6p22.1  | . | .  | .   | Score=207 rs765 ID=COSN1. | .      | . | . | .     | .     | . |
| ENST0. | 6p22.1  | . | .  | Sc  | c.                        | .      | . | . | .     | .     | . |
| ENST0. | 6p21.33 | . | .  | .   | rs751.                    | .      | . | . | .     | .     | . |
| ENST0. | 6p21.33 | . | .  | .   | .                         | .      | . | . | .     | .     | . |
| ENST0. | 6p21.33 | . | .  | .   | .                         | .      | . | . | .     | .     | . |
| .      | 6p21.33 | . | .  | .   | .                         | .      | . | . | .     | .     | . |
| ENST0. | 6p21.33 | . | .  | .   | rs779.                    | .      | . | . | .     | .     | . |
| ENST0. | 6p21.33 | . | .  | .   | .                         | .      | . | . | .     | .     | . |
| ENST0. | 6p21.32 | . | .  | .   | .                         | .      | . | . | .     | .     | . |
| ENST0. | 6p21.32 | . | .  | .   | rs111.                    | .      | . | . | .     | .     | . |
| ENST0. | 6p21.32 | . | Sc | c.  | rs775.                    | .      | . | . | .     | .     | . |
| ENST0. | 6p21.31 | . | Sc | c.  | .                         | .      | . | . | .     | .     | . |





|        |        |                  |                 |           |       |
|--------|--------|------------------|-----------------|-----------|-------|
| ENST0. | 6q25.1 | . Scc.           | rs777.          | . . . . . |       |
| ENST0. | 6q25.1 | . Scc.           | . . . . .       | . . . . . |       |
| ENST0. | 6q25.1 | . . Scc.         | . . . . .       | . . . . . |       |
| ENST0. | 6q25.1 | . . . . .        | . . . . .       | . . . . . |       |
| ENST0. | 6q25.1 | . . . . .        | . . . . .       | . . . . . |       |
| ENST0. | 6q25.2 | . . . . .        | rs529.          | . . . . . |       |
| ENST0. | 6q25.2 | . . . . .        | . ID=COSN7.     | . . . . . |       |
| ENST0. | 6q25.2 | . . . . .        | . . . . .       | . . . . . |       |
| ENST0. | 6q25.2 | . . . . .        | . . . . .       | . . . . . |       |
| ENST0. | 6q25.3 | . . . . .        | . ID=COSM.      | . . . . . |       |
| ENST0. | 6q25.3 | . . . . .        | rs101.          | . . . . . |       |
| ENST0. | 6q25.3 | . Scc.           | . . . . .       | . . . . . |       |
| ENST0. | 6q25.3 | . . Scc.         | . . . . .       | . . . . . |       |
| ENST0. | 6q25.3 | . . . Score=137. | . . . . .       | . . . . . |       |
| ENST0. | 6q26   | . . Scc.         | . . . . .       | . . . . . |       |
| ENST0. | 6q26   | . . . . .        | . . . . .       | . . . . . |       |
| ENST0. | 6q26   | . . . . .        | . . . . .       | . . . . . |       |
| ENST0. | 6q26   | . Scc.           | rs773.          | . . . . . |       |
| ENST0. | 6q27   | . . . . .        | rs200 ID=COSM.  | . . . . . | 4E-04 |
| ENST0. | 6q27   | . . Scc.         | rs755.          | . . . . . |       |
| ENST0. | 6q27   | . . . . .        | . . . . .       | . . . . . |       |
| ENST0. | 7p22.3 | . . . . .        | . . . . .       | . . . . . |       |
| . . .  | 7p22.3 | . . . . .        | . . . . .       | . . . . . |       |
| ENST0. | 7p22.3 | . . . . .        | . . . . .       | . . . . . |       |
| ENST0. | 7p22.3 | . . . . .        | . . . . .       | . . . . . |       |
| ENST0. | 7p22.3 | . Scc.           | rs778.          | . . . . . |       |
| ENST0. | 7p22.3 | . . . . .        | . . . . .       | . . . . . |       |
| ENST0. | 7p22.3 | . . . Score=481. | . . . . .       | . . . . . |       |
| ENST0. | 7p22.3 | . . . . .        | rs561.          | . . . . . | 2E-04 |
| ENST0. | 7p22.2 | . . . . .        | . . . . .       | . . . . . |       |
| ENST0. | 7p22.2 | . . . . .        | rs369.          | . . . . . |       |
| ENST0. | 7p22.2 | . . . . .        | . . . . .       | . . . . . |       |
| ENST0. | 7p22.1 | . . . . .        | rs541.          | . . . . . |       |
| ENST0. | 7p22.1 | . . Scc.         | . . . . .       | . . . . . |       |
| ENST0. | 7p22.1 | . . . . .        | . . . . .       | . . . . . |       |
| ENST0. | 7p22.1 | . . . . .        | rs774.          | . . . . . |       |
| ENST0. | 7p22.1 | . Scc.           | . . . . .       | . . . . . |       |
| ENST0. | 7p22.1 | . . Scc.         | . . . . .       | . . . . . |       |
| ENST0. | 7p22.1 | . . Scc.         | rs780 ID=COSM.  | . . . . . |       |
| ENST0. | 7p22.1 | . . Scc.         | rs879.          | . . . . . |       |
| ENST0. | 7p22.1 | . . Scc.         | rs372 ID=COSN1. | . . . . . |       |
| ENST0. | 7p21.3 | . . . . .        | . . . . .       | . . . . . |       |
| ENST0. | 7p21.3 | . . . . .        | . ID=COSM.      | . . . . . |       |
| ENST0. | 7p21.3 | . . . Score=193. | . . . . .       | . . . . . |       |
| ENST0. | 7p21.3 | . . . . .        | . . . . .       | . . . . . |       |
| ENST0. | 7p21.1 | . . . . .        | . . . . .       | . . . . . |       |
| ENST0. | 7p15.3 | . . . . .        | rs371.          | . . . . . |       |
| ENST0. | 7p15.3 | . . . Score=840. | . . . . .       | . . . . . |       |
| ENST0. | 7p15.3 | . . . . .        | . . . . .       | . . . . . |       |
| ENST0. | 7p15.2 | . . . . .        | rs142.          | . . . . . |       |
| ENST0. | 7p14.3 | . . . . .        | . . . . .       | . . . . . |       |
| . . .  | 7p14.3 | . . . . .        | . . . . .       | . . . . . |       |









|        |         |     |                             |  |  |       |       |
|--------|---------|-----|-----------------------------|--|--|-------|-------|
| ENST0. | 9p22.2  | Sc. | rs771.                      |  |  |       |       |
| ENST0. | 9p22.1  |     |                             |  |  |       |       |
| ENST0. | 9p21.3  | Sc. | rs755 ID=COSM.              |  |  |       |       |
| ENST0. | 9p21.3  |     | Score=301 rs898.            |  |  |       |       |
| ENST0. | 9p21.1  |     | rs770.                      |  |  |       |       |
| ENST0. | 9p13.3  |     |                             |  |  |       |       |
| ENST0. | 9p13.3  |     | ID=COSM.                    |  |  |       |       |
| ENST0. | 9p13.2  | Sc. |                             |  |  |       |       |
| ENST0. | 9p13.2  |     | ID=COSM.                    |  |  |       |       |
| ENST0. | 9p13.1  | Sc. | rs161 ID=COSN1.             |  |  |       |       |
| ENST0. | 9p11.2  |     | Sc Score=23; rs782 ID=COSM. |  |  |       |       |
| .      | 9p11.2  |     | Sc Score=266 rs625.         |  |  |       |       |
| ENST0. | 9q12    | Sc. |                             |  |  |       |       |
| ENST0. | 9q13    | Sc. | rs200 ID=COSN2.             |  |  |       |       |
| .      | 9q13    |     | Sc Score=865 rs201.         |  |  |       |       |
| .      | 9q13    | Sc. | rs201.                      |  |  |       |       |
| ENST0. | 9q13    | Sc. | rs376 ID=COSN1.             |  |  |       |       |
| ENST0. | 9q13    | Sc. |                             |  |  |       |       |
| ENST0. | 9q21.11 | Sc. |                             |  |  |       |       |
| ENST0. | 9q21.11 | Sc. | rs750.                      |  |  |       |       |
| ENST0. | 9q21.12 |     | Score=743.                  |  |  |       |       |
| ENST0. | 9q21.13 | Sc. |                             |  |  |       |       |
| ENST0. | 9q21.13 |     |                             |  |  |       |       |
| ENST0. | 9q21.2  |     | rs966.                      |  |  |       |       |
| ENST0. | 9q21.31 |     | rs529.                      |  |  |       |       |
| .      | 9q21.31 |     |                             |  |  |       |       |
| ENST0. | 9q21.32 | Sc. | rs569 ID=COSM.              |  |  |       | 2E-04 |
| ENST0. | 9q21.32 | Sc. |                             |  |  |       |       |
| ENST0. | 9q21.32 |     | rs774.                      |  |  |       |       |
| ENST0. | 9q21.33 |     |                             |  |  |       |       |
| ENST0. | 9q21.33 |     |                             |  |  |       |       |
| ENST0. | 9q22.1  | Sc. | rs936.                      |  |  |       |       |
| ENST0. | 9q22.1  |     | rs144.                      |  |  |       | 8E-04 |
| ENST0. | 9q22.31 |     |                             |  |  |       |       |
| ENST0. | 9q22.31 |     | Score=195.                  |  |  |       |       |
| ENST0. | 9q22.31 |     | rs535.                      |  |  |       | 4E-04 |
| ENST0. | 9q22.31 |     | ID=COSN2.                   |  |  |       |       |
| ENST0. | 9q22.31 | Sc. |                             |  |  |       |       |
| ENST0. | 9q22.32 |     |                             |  |  |       |       |
| ENST0. | 9q22.33 |     | rs575.                      |  |  |       | 6E-04 |
| ENST0. | 9q22.33 |     | rs566 ID=COSM.              |  |  |       | 2E-04 |
| ENST0. | 9q22.33 |     | rs534.                      |  |  | 0.001 | 6E-04 |
| ENST0. | 9q31.2  |     | Score=139 rs527.            |  |  |       |       |
| ENST0. | 9q31.3  |     |                             |  |  |       |       |
| ENST0. | 9q32    | Sc. | rs941.                      |  |  |       |       |
| ENST0. | 9q32    | Sc. | rs753.                      |  |  |       |       |
| ENST0. | 9q32    |     | Score=939.                  |  |  |       |       |
| ENST0. | 9q32    |     |                             |  |  |       |       |
| ENST0. | 9q32    |     | rs101.                      |  |  |       |       |
| ENST0. | 9q32    |     |                             |  |  |       |       |
| ENST0. | 9q32    |     | rs529.                      |  |  |       | 4E-04 |
| ENST0. | 9q32    |     | Score=226.                  |  |  |       |       |
| ENST0. | 9q33.1  | Sc. | rs539 ID=COSM.              |  |  |       |       |
| ENST0. | 9q33.2  |     | rs577.                      |  |  |       | 1E-03 |

|        |         |   |     |   |                           |      |   |   |   |       |       |
|--------|---------|---|-----|---|---------------------------|------|---|---|---|-------|-------|
| ENST0. | 9q33.2  | . | .   | . | rs776.                    | .    | . | . | . | .     | .     |
| ENST0. | 9q33.2  | . | .   | . | .                         | .    | . | . | . | .     | .     |
| ENST0. | 9q33.2  | . | Sc. | . | rs781.                    | .    | . | . | . | .     | .     |
| ENST0. | 9q33.2  | . | Sc. | . | .                         | .    | . | . | . | .     | .     |
| ENST0. | 9q33.3  | . | .   | . | .                         | .    | . | . | . | .     | .     |
| ENST0. | 9q33.3  | . | .   | . | Score=253 rs767.          | .    | . | . | . | .     | .     |
| ENST0. | 9q33.3  | . | .   | . | .                         | .    | . | . | . | .     | .     |
| ENST0. | 9q33.3  | . | .   | . | .                         | .    | . | . | . | .     | .     |
| ENST0. | 9q33.3  | . | .   | . | rs770.                    | .    | . | . | . | .     | .     |
| ENST0. | 9q34.11 | . | .   | . | rs751.                    | .    | . | . | . | .     | .     |
| ENST0. | 9q34.11 | . | .   | . | .                         | .    | . | . | . | .     | .     |
| ENST0. | 9q34.11 | . | .   | . | rs772 ID=COSMk.           | .    | . | . | . | .     | .     |
| ENST0. | 9q34.11 | . | .   | . | rs375.                    | .    | . | . | . | .     | .     |
| ENST0. | 9q34.11 | . | Sc. | . | rs770.                    | .    | . | . | . | .     | .     |
| ENST0. | 9q34.11 | . | .   | . | rs370.                    | Lik. | . | . | . | .     | .     |
| ENST0. | 9q34.11 | . | Sc. | . | rs102.                    | .    | . | . | . | .     | .     |
| ENST0. | 9q34.11 | . | .   | . | .                         | .    | . | . | . | .     | .     |
| ENST0. | 9q34.11 | . | .   | . | rs120.                    | .    | . | . | . | .     | 0.005 |
| ENST0. | 9q34.11 | . | .   | . | Score=311 rs483 ID=COSN1. | .    | . | . | . | .     | .     |
| ENST0. | 9q34.11 | . | .   | . | Score=311 rs483 ID=COSN1. | .    | . | . | . | .     | .     |
| ENST0. | 9q34.11 | . | .   | . | rs769.                    | .    | . | . | . | .     | .     |
| ENST0. | 9q34.11 | . | .   | . | .                         | .    | . | . | . | .     | .     |
| ENST0. | 9q34.11 | . | Sc. | . | ID=COSMk.                 | .    | . | . | . | .     | .     |
| ENST0. | 9q34.13 | . | .   | . | rs937 ID=COSMk.           | .    | . | . | . | .     | .     |
| ENST0. | 9q34.13 | . | .   | . | .                         | .    | . | . | . | .     | .     |
| ENST0. | 9q34.13 | . | .   | . | .                         | .    | . | . | . | .     | .     |
| ENST0. | 9q34.13 | . | .   | . | rs449.                    | .    | . | . | . | 0.038 | 0.087 |
| ENST0. | 9q34.2  | . | .   | . | .                         | .    | . | . | . | .     | .     |
| ENST0. | 9q34.2  | . | .   | . | Score=387.                | .    | . | . | . | .     | .     |
| ENST0. | 9q34.2  | . | .   | . | .                         | .    | . | . | . | .     | .     |
| ENST0. | 9q34.2  | . | .   | . | .                         | .    | . | . | . | .     | .     |
| ENST0. | 9q34.2  | . | .   | . | rs782 ID=COSMk.           | .    | . | . | . | .     | .     |
| ENST0. | 9q34.2  | . | .   | . | rs780.                    | .    | . | . | . | .     | .     |
| ENST0. | 9q34.2  | . | .   | . | .                         | .    | . | . | . | .     | .     |
| ENST0. | 9q34.3  | . | .   | . | .                         | .    | . | . | . | .     | .     |
| ENST0. | 9q34.3  | . | .   | . | rs617.                    | Be.  | . | . | . | .     | 2E-04 |
| ENST0. | 9q34.3  | . | .   | . | rs747.                    | .    | . | . | . | .     | .     |
| ENST0. | 9q34.3  | . | .   | . | .                         | .    | . | . | . | .     | .     |
| ENST0. | 9q34.3  | . | .   | . | rs994 ID=COSN2.           | .    | . | . | . | .     | .     |
| ENST0. | 9q34.3  | . | .   | . | .                         | .    | . | . | . | .     | .     |
| ENST0. | 9q34.3  | . | .   | . | .                         | .    | . | . | . | .     | .     |
| ENST0. | 9q34.3  | . | .   | . | Score=445.                | .    | . | . | . | .     | .     |
| ENST0. | 9q34.3  | . | .   | . | rs139.                    | .    | . | . | . | .     | .     |
| ENST0. | 9q34.3  | . | .   | . | rs565.                    | .    | . | . | . | .     | 2E-04 |
| ENST0. | 9q34.3  | . | .   | . | rs778.                    | .    | . | . | . | .     | .     |
| ENST0. | 9q34.3  | . | .   | . | .                         | .    | . | . | . | .     | .     |
| ENST0. | 9q34.3  | . | .   | . | rs777 ID=COSMk.           | .    | . | . | . | .     | .     |
| ENST0. | 9q34.3  | . | .   | . | rs112.                    | .    | . | . | . | 0.001 | 8E-04 |
| ENST0. | 9q34.3  | . | .   | . | .                         | .    | . | . | . | .     | .     |
| ENST0. | 9q34.3  | . | Sc. | . | rs370.                    | .    | . | . | . | .     | .     |
| ENST0. | 10p15.3 | . | .   | . | rs754.                    | .    | . | . | . | .     | .     |

|        |          |   |      |           |                      |   |   |   |   |       |       |       |   |
|--------|----------|---|------|-----------|----------------------|---|---|---|---|-------|-------|-------|---|
| ENST0. | 10p15.3  | . | .    | .         | Score=602.           | . | . | . | . | .     | .     | .     | . |
| ENST0. | 10p15.2  | . | .    | .         | rs568.               | . | . | . | . | 0.001 | 2E-04 | .     | . |
| ENST0. | 10p15.1  | . | .    | .         | Score=234.           | . | . | . | . | .     | .     | .     | . |
| ENST0. | 10p14    | . | .    | .         | rs201 ID=COSM'       | . | . | . | . | .     | .     | 4E-04 | . |
| ENST0. | 10p14    | . | .    | .         | Score=128 rs796.     | . | . | . | . | .     | .     | .     | . |
| ENST0. | 10p14    | . | .    | .         | rs370 ID=COSMk.      | . | . | . | . | .     | .     | .     | . |
| ENST0. | 10p14    | . | .    | .         | .                    | . | . | . | . | .     | .     | .     | . |
| ENST0. | 10p14    | . | .    | .         | Score=746.           | . | . | . | . | .     | .     | .     | . |
| ENST0. | 10p14    | . | .    | .         | .                    | . | . | . | . | .     | .     | .     | . |
| ENST0. | 10p13    | . | .    | .         | Scs Score=181 rs191. | . | . | . | . | .     | .     | 6E-04 | . |
| ENST0. | 10p13    | . | .    | .         | rs765 ID=COSN€.      | . | . | . | . | 0.03  | 0.007 | .     | . |
| ENST0. | 10p13    | . | .    | .         | .                    | . | . | . | . | .     | .     | .     | . |
| ENST0. | 10p12.31 | . | .    | .         | .                    | . | . | . | . | .     | .     | .     | . |
| ENST0. | 10p12.31 | . | .    | .         | rs965.               | . | . | . | . | .     | .     | .     | . |
| ENST0. | 10p12.1  | . | .    | .         | .                    | . | . | . | . | .     | .     | .     | . |
| ENST0. | 10p12.1  | . | Scs  | Scs.      | rs764.               | . | . | . | . | .     | .     | .     | . |
| ENST0. | 10p12.1  | . | .    | .         | rs199.               | . | . | . | . | .     | .     | 0.003 | . |
| ENST0. | 10p12.1  | . | .    | .         | .                    | . | . | . | . | .     | .     | .     | . |
| ENST0. | 10p12.1  | . | .    | .         | ID=COSN€.            | . | . | . | . | .     | .     | .     | . |
| ENST0. | 10p12.1  | . | .    | .         | rs367 ID=COSM¿ Ur.   | . | . | . | . | .     | .     | .     | . |
| ENST0. | 10p12.1  | . | .    | .         | .                    | . | . | . | . | .     | .     | .     | . |
| ENST0. | 10p12.1  | . | Scs. | .         | ID=COSN1.            | . | . | . | . | .     | .     | .     | . |
| ENST0. | 10p11.23 | . | Scs. | .         | rs776.               | . | . | . | . | .     | .     | .     | . |
| ENST0. | 10p11.23 | . | Scs. | .         | rs573.               | . | . | . | . | .     | .     | 2E-04 | . |
| ENST0. | 10p11.21 | . | Scs. | .         | ID=COSM'             | . | . | . | . | .     | .     | .     | . |
| ENST0. | 10q11.21 | . | Scs. | .         | .                    | . | . | . | . | .     | .     | .     | . |
| ENST0. | 10q11.22 | . | Scs. | .         | ID=COSN€.            | . | . | . | . | .     | .     | .     | . |
| ENST0. | 10q11.22 | . | Scs. | .         | .                    | . | . | . | . | .     | .     | .     | . |
| ENST0. | 10q11.22 | . | Scs. | .         | .                    | . | . | . | . | .     | .     | .     | . |
| ENST0. | 10q11.22 | . | Scs. | .         | .                    | . | . | . | . | .     | .     | .     | . |
| ENST0. | 10q11.23 | . | .    | .         | .                    | . | . | . | . | .     | .     | .     | . |
| ENST0. | 10q11.23 | . | .    | .         | rs904 ID=COSM'       | . | . | . | . | .     | .     | .     | . |
| ENST0. | 10q11.23 | . | .    | .         | rs374.               | . | . | . | . | .     | .     | .     | . |
| ENST0. | 10q11.23 | . | Scs. | .         | .                    | . | . | . | . | .     | .     | .     | . |
| ENST0. | 10q21.1  | . | .    | .         | rs751.               | . | . | . | . | .     | .     | .     | . |
| ENST0. | 10q21.1  | . | .    | .         | Score=474.           | . | . | . | . | .     | .     | .     | . |
| ENST0. | 10q21.1  | . | .    | .         | rs138 ID=COSM¿.      | . | . | . | . | .     | .     | 6E-04 | . |
| ENST0. | 10q21.2  | . | .    | .         | rs573.               | . | . | . | . | .     | .     | 8E-04 | . |
| ENST0. | 10q21.3  | . | .    | .         | Score=101.           | . | . | . | . | .     | .     | .     | . |
| ENST0. | 10q22.1  | . | .    | .         | .                    | . | . | . | . | .     | .     | .     | . |
| ENST0. | 10q22.1  | . | .    | .         | rs754 ID=COSM€.      | . | . | . | . | .     | .     | .     | . |
| ENST0. | 10q22.1  | . | Scs. | .         | .                    | . | . | . | . | .     | .     | .     | . |
| ENST0. | 10q22.1  | . | .    | .         | rs374.               | . | . | . | . | .     | .     | .     | . |
| ENST0. | 10q22.1  | . | Scs. | .         | rs201 ID=COSM' Lik.  | . | . | . | . | .     | .     | 2E-04 | . |
| ENST0. | 10q22.1  | . | Scs. | .         | .                    | . | . | . | . | .     | .     | .     | . |
| ENST0. | 10q22.2  | . | .    | .         | .                    | . | . | . | . | .     | .     | .     | . |
| ENST0. | 10q22.2  | . | .    | .         | rs775.               | . | . | . | . | .     | .     | .     | . |
| ENST0. | 10q22.2  | . | Scs. | .         | rs780 ID=COSN¿.      | . | . | . | . | .     | .     | .     | . |
| ENST0. | 10q22.2  | . | Scs  | Score=233 | rs878.               | . | . | . | . | .     | .     | .     | . |
| ENST0. | 10q22.2  | . | Scs. | .         | .                    | . | . | . | . | .     | .     | .     | . |
| ENST0. | 10q22.3  | . | .    | .         | .                    | . | . | . | . | .     | .     | .     | . |
| ENST0. | 10q22.3  | . | .    | .         | .                    | . | . | . | . | .     | .     | .     | . |
| ENST0. | 10q23.1  | . | Scs. | .         | rs568.               | . | . | . | . | 0.001 | 2E-04 | .     | . |



|         |          |     |     |   |           |                |     |   |   |   |       |
|---------|----------|-----|-----|---|-----------|----------------|-----|---|---|---|-------|
| ENST0 . | 10q23.1  | .   | .   | . | .         | .              | .   | . | . | . | .     |
| ENST0 . | 10q23.1  | .   | .   | . | .         | .              | .   | . | . | . | .     |
| ENST0 . | 10q23.1  | .   | .   | . | .         | .              | .   | . | . | . | .     |
| .       | 10q23.32 | .   | .   | . | Score=895 | rs529.         | .   | . | . | . | .     |
| ENST0 . | 10q23.33 | .   | .   | . | .         | .              | .   | . | . | . | .     |
| ENST0 . | 10q23.33 | .   | .   | . | .         | rs369.         | .   | . | . | . | .     |
| ENST0 . | 10q23.33 | .   | .   | . | .         | rs753.         | .   | . | . | . | .     |
| ENST0 . | 10q23.33 | .   | .   | . | .         | .              | .   | . | . | . | .     |
| ENST0 . | 10q24.1  | .   | .   | . | Score=890 | rs904.         | .   | . | . | . | .     |
| ENST0 . | 10q24.1  | .   | .   | . | .         | rs782.         | .   | . | . | . | .     |
| ENST0 . | 10q24.1  | .   | .   | . | .         | .              | .   | . | . | . | .     |
| ENST0 . | 10q24.2  | .   | .   | . | Score=204 | rs376.         | .   | . | . | . | .     |
| ENST0 . | 10q24.2  | .   | .   | . | .         | rs994.         | .   | . | . | . | .     |
| ENST0 . | 10q24.2  | .   | .   | . | .         | rs539 ID=COSM. | .   | . | . | . | .     |
| ENST0 . | 10q24.2  | Sc. | .   | . | .         | rs369.         | .   | . | . | . | .     |
| ENST0 . | 10q24.31 | .   | .   | . | .         | rs944.         | .   | . | . | . | .     |
| ENST0 . | 10q24.32 | .   | .   | . | .         | .              | .   | . | . | . | .     |
| ENST0 . | 10q24.32 | .   | .   | . | .         | .              | .   | . | . | . | .     |
| ENST0 . | 10q24.32 | .   | .   | . | .         | .              | .   | . | . | . | .     |
| ENST0 . | 10q25.1  | .   | .   | . | .         | .              | .   | . | . | . | .     |
| ENST0 . | 10q25.1  | .   | .   | . | .         | .              | .   | . | . | . | .     |
| ENST0 . | 10q25.1  | .   | .   | . | .         | .              | .   | . | . | . | .     |
| ENST0 . | 10q25.3  | .   | .   | . | Score=297 | .              | .   | . | . | . | .     |
| ENST0 . | 10q25.3  | .   | .   | . | .         | .              | .   | . | . | . | .     |
| ENST0 . | 10q26.11 | .   | .   | . | Score=240 | .              | .   | . | . | . | .     |
| ENST0 . | 10q26.13 | .   | .   | . | .         | .              | .   | . | . | . | .     |
| ENST0 . | 10q26.13 | .   | .   | . | .         | rs750 ID=COSM. | .   | . | . | . | .     |
| ENST0 . | 10q26.2  | .   | .   | . | .         | .              | .   | . | . | . | .     |
| ENST0 . | 10q26.2  | .   | .   | . | .         | rs376.         | .   | . | . | . | .     |
| ENST0 . | 10q26.2  | .   | .   | . | .         | ID=COSM.       | .   | . | . | . | .     |
| ENST0 . | 10q26.3  | .   | .   | . | .         | rs545.         | .   | . | . | . | 2E-04 |
| ENST0 . | 10q26.3  | .   | .   | . | .         | .              | .   | . | . | . | .     |
| ENST0 . | 10q26.3  | .   | .   | . | .         | .              | .   | . | . | . | .     |
| ENST0 . | 10q26.3  | .   | .   | . | .         | rs539.         | .   | . | . | . | 2E-04 |
| ENST0 . | 10q26.3  | Sc. | .   | . | .         | .              | .   | . | . | . | .     |
| ENST0 . | 10q26.3  | Sc. | .   | . | .         | .              | .   | . | . | . | .     |
| ENST0 . | 10q26.3  | .   | .   | . | .         | rs779 ID=COSN. | .   | . | . | . | .     |
| ENST0 . | 10q26.3  | .   | .   | . | .         | .              | .   | . | . | . | .     |
| ENST0 . | 10q26.3  | .   | .   | . | .         | .              | .   | . | . | . | .     |
| ENST0 . | 11p15.5  | .   | Sc. | . | .         | .              | .   | . | . | . | .     |
| ENST0 . | 11p15.5  | .   | .   | . | .         | rs200 ID=COSN. | .   | . | . | . | .     |
| ENST0 . | 11p15.5  | .   | .   | . | .         | .              | .   | . | . | . | .     |
| ENST0 . | 11p15.5  | .   | .   | . | .         | rs100.         | .   | . | . | . | .     |
| ENST0 . | 11p15.5  | .   | .   | . | .         | rs779.         | .   | . | . | . | .     |
| ENST0 . | 11p15.5  | Sc. | .   | . | .         | rs374.         | .   | . | . | . | .     |
| ENST0 . | 11p15.5  | .   | .   | . | .         | .              | .   | . | . | . | .     |
| ENST0 . | 11p15.5  | .   | .   | . | .         | rs896.         | .   | . | . | . | .     |
| ENST0 . | 11p15.5  | .   | .   | . | .         | rs758.         | .   | . | . | . | .     |
| ENST0 . | 11p15.5  | .   | .   | . | .         | rs751.         | .   | . | . | . | .     |
| ENST0 . | 11p15.5  | .   | .   | . | .         | .              | .   | . | . | . | .     |
| ENST0 . | 11p15.5  | .   | .   | . | .         | ID=COSM.       | .   | . | . | . | .     |
| ENST0 . | 11p15.5  | Sc. | .   | . | .         | ID=COSM.       | .   | . | . | . | .     |
| ENST0 . | 11p15.5  | .   | .   | . | .         | rs368 ID=COSM  | Ur. | . | . | . | .     |

|        |         |   |        |   |                           |   |   |   |       |       |   |
|--------|---------|---|--------|---|---------------------------|---|---|---|-------|-------|---|
| ENST0. | 11p15.5 | . | .      | . | .                         | . | . | . | .     | .     | . |
| .      | 11p15.5 | . | .      | . | rs101.                    | . | . | . | .     | .     | . |
| ENST0. | 11p15.5 | . | .      | . | Score=138 rs772.          | . | . | . | .     | .     | . |
| ENST0. | 11p15.5 | . | .      | . | .                         | . | . | . | .     | .     | . |
| ENST0. | 11p15.5 | . | .      | . | .                         | . | . | . | .     | .     | . |
| .      | 11p15.4 | . | Sc.    | . | rs559 ID=COSN2.           | . | . | . | 0.115 | 0.18  | . |
| ENST0. | 11p15.4 | . | .      | . | .                         | . | . | . | .     | .     | . |
| ENST0. | 11p15.4 | . | .      | . | ID=COSM4.                 | . | . | . | .     | .     | . |
| ENST0. | 11p15.4 | . | .      | . | Score=351 rs866 ID=COSN1. | . | . | . | .     | .     | . |
| ENST0. | 11p15.4 | . | .      | . | .                         | . | . | . | .     | .     | . |
| ENST0. | 11p15.4 | . | .      | . | rs728.                    | . | . | . | 0.001 | 0.01  | . |
| ENST0. | 11p15.4 | . | .      | . | .                         | . | . | . | .     | .     | . |
| ENST0. | 11p15.4 | . | .      | . | .                         | . | . | . | .     | .     | . |
| ENST0. | 11p15.3 | . | .      | . | rs759.                    | . | . | . | .     | 0.003 | . |
| ENST0. | 11p15.2 | . | Sc.    | . | rs781.                    | . | . | . | .     | .     | . |
| ENST0. | 11p15.2 | . | .      | . | ID=COSM6.                 | . | . | . | .     | .     | . |
| ENST0. | 11p15.2 | . | .      | . | rs782 ID=COSM8.           | . | . | . | .     | .     | . |
| ENST0. | 11p15.2 | . | Sc.    | . | .                         | . | . | . | .     | .     | . |
| ENST0. | 11p15.2 | . | .      | . | .                         | . | . | . | .     | .     | . |
| ENST0. | 11p15.1 | . | .      | . | Score=671.                | . | . | . | .     | .     | . |
| ENST0. | 11p15.1 | . | .      | . | rs778.                    | . | . | . | .     | .     | . |
| ENST0. | 11p15.1 | . | Sc.    | . | .                         | . | . | . | .     | .     | . |
| ENST0. | 11p15.1 | . | Sc.    | . | .                         | . | . | . | .     | .     | . |
| ENST0. | 11p15.1 | . | .      | . | .                         | . | . | . | .     | .     | . |
| ENST0. | 11p15.1 | . | Sc.    | . | .                         | . | . | . | .     | .     | . |
| ENST0. | 11p15.1 | . | .      | . | .                         | . | . | . | .     | .     | . |
| ENST0. | 11p15.1 | . | Sc.    | . | rs114.                    | . | . | . | .     | 0.005 | . |
| ENST0. | 11p14.3 | . | .      | . | .                         | . | . | . | .     | .     | . |
| ENST0. | 11p14.3 | . | Sc.    | . | .                         | . | . | . | .     | .     | . |
| ENST0. | 11p13   | . | .      | . | .                         | . | . | . | .     | .     | . |
| ENST0. | 11p13   | . | .      | . | .                         | . | . | . | .     | .     | . |
| ENST0. | 11p11.2 | . | Sc.    | . | .                         | . | . | . | .     | .     | . |
| ENST0. | 11p11.2 | . | Sc.    | . | .                         | . | . | . | .     | .     | . |
| ENST0. | 11p11.2 | . | Sc.    | . | .                         | . | . | . | .     | .     | . |
| ENST0. | 11p11.2 | . | .      | . | Score=457 rs773.          | . | . | . | .     | .     | . |
| ENST0. | 11q11   | . | Sc Sc. | . | ID=COSM7.                 | . | . | . | .     | .     | . |
| ENST0. | 11q11   | . | .      | . | rs778.                    | . | . | . | .     | .     | . |
| ENST0. | 11q12.1 | . | .      | . | .                         | . | . | . | .     | .     | . |
| ENST0. | 11q12.1 | . | Sc.    | . | rs755.                    | . | . | . | .     | .     | . |
| ENST0. | 11q12.1 | . | .      | . | rs370.                    | . | . | . | .     | .     | . |
| ENST0. | 11q12.1 | . | .      | . | rs746.                    | . | . | . | .     | .     | . |
| ENST0. | 11q12.2 | . | .      | . | rs761.                    | . | . | . | .     | .     | . |
| ENST0. | 11q12.2 | . | .      | . | .                         | . | . | . | .     | .     | . |
| ENST0. | 11q12.2 | . | .      | . | .                         | . | . | . | .     | .     | . |
| ENST0. | 11q12.3 | . | .      | . | rs750.                    | . | . | . | .     | .     | . |
| ENST0. | 11q12.3 | . | .      | . | rs368.                    | . | . | . | .     | .     | . |
| ENST0. | 11q12.3 | . | .      | . | rs373.                    | . | . | . | .     | .     | . |
| ENST0. | 11q12.3 | . | .      | . | .                         | . | . | . | .     | .     | . |
| ENST0. | 11q13.1 | . | .      | . | rs755.                    | . | . | . | .     | .     | . |
| ENST0. | 11q13.1 | . | .      | . | rs320 ID=COSN2.           | . | . | . | .     | 0.023 | . |
| ENST0. | 11q13.1 | . | .      | . | .                         | . | . | . | .     | .     | . |
| ENST0. | 11q13.1 | . | Sc.    | . | rs769.                    | . | . | . | .     | .     | . |
| ENST0. | 11q13.1 | . | Sc.    | . | rs759.                    | . | . | . | .     | .     | . |

|        |         |   |     |   |                         |     |   |   |       |
|--------|---------|---|-----|---|-------------------------|-----|---|---|-------|
| ENST0. | 11q13.1 | . | .   | . | rs200 ID=COSM           | .   | . | . | 2E-04 |
| ENST0. | 11q13.1 | . | .   | . | Score=224.              | .   | . | . | .     |
| ENST0. | 11q13.1 | . | .   | . | .                       | .   | . | . | .     |
| ENST0. | 11q13.1 | . | Sc. | . | .                       | .   | . | . | .     |
| ENST0. | 11q13.1 | . | .   | . | rs373.                  | .   | . | . | .     |
| ENST0. | 11q13.1 | . | .   | . | .                       | .   | . | . | .     |
| ENST0. | 11q13.1 | . | .   | . | .                       | .   | . | . | .     |
| ENST0. | 11q13.1 | . | Sc. | . | .                       | .   | . | . | .     |
| ENST0. | 11q13.2 | . | .   | . | .                       | .   | . | . | .     |
| ENST0. | 11q13.2 | . | .   | . | .                       | .   | . | . | .     |
| ENST0. | 11q13.2 | . | Sc. | . | .                       | .   | . | . | .     |
| ENST0. | 11q13.2 | . | .   | . | .                       | .   | . | . | .     |
| ENST0. | 11q13.2 | . | .   | . | rs891.                  | .   | . | . | .     |
| ENST0. | 11q13.2 | . | .   | . | rs143.                  | .   | . | . | .     |
| ENST0. | 11q13.3 | . | .   | . | rs762.                  | .   | . | . | .     |
| ENST0. | 11q13.3 | . | .   | . | .                       | .   | . | . | .     |
| ENST0. | 11q13.3 | . | .   | . | .                       | .   | . | . | .     |
| ENST0. | 11q13.4 | . | Sc. | . | rs772 ID=COSM           | .   | . | . | .     |
| ENST0. | 11q13.4 | . | .   | . | Score=485 rs191.        | Ur. | . | . | 0.002 |
| ENST0. | 11q13.4 | . | .   | . | .                       | .   | . | . | .     |
| ENST0. | 11q13.4 | . | .   | . | .                       | .   | . | . | .     |
| ENST0. | 11q13.4 | . | .   | . | Score=350.              | .   | . | . | .     |
| ENST0. | 11q13.4 | . | .   | . | .                       | .   | . | . | .     |
| ENST0. | 11q13.4 | . | .   | . | .                       | .   | . | . | .     |
| ENST0. | 11q13.4 | . | Sc. | . | .                       | .   | . | . | .     |
| ENST0. | 11q13.4 | . | .   | . | .                       | .   | . | . | .     |
| ENST0. | 11q13.4 | . | .   | . | rs780.                  | .   | . | . | .     |
| ENST0. | 11q13.5 | . | Sc. | . | rs780.                  | .   | . | . | .     |
| ENST0. | 11q13.5 | . | .   | . | rs745.                  | .   | . | . | .     |
| ENST0. | 11q14.1 | . | .   | . | .                       | .   | . | . | .     |
| ENST0. | 11q14.1 | . | .   | . | Score=320 rs372.        | .   | . | . | .     |
| ENST0. | 11q14.1 | . | Sc. | . | .                       | .   | . | . | .     |
| ENST0. | 11q14.3 | . | Sc. | . | ID=COSM                 | .   | . | . | .     |
| ENST0. | 11q14.3 | . | Sc. | . | .                       | .   | . | . | .     |
| ENST0. | 11q21   | . | .   | . | rs791.                  | .   | . | . | 0.007 |
| ENST0. | 11q22.3 | . | .   | . | rs191.                  | Ur. | . | . | 0.001 |
| ENST0. | 11q22.3 | . | .   | . | rs754.                  | .   | . | . | .     |
| ENST0. | 11q22.3 | . | Sc. | . | rs763.                  | .   | . | . | .     |
| ENST0. | 11q22.3 | . | .   | . | .                       | .   | . | . | .     |
| ENST0. | 11q22.3 | . | .   | . | .                       | .   | . | . | .     |
| ENST0. | 11q23.1 | . | .   | . | rs574.                  | .   | . | . | 4E-04 |
| ENST0. | 11q23.1 | . | Sc. | . | rs104.                  | .   | . | . | .     |
| ENST0. | 11q23.1 | . | .   | . | rs973.                  | .   | . | . | .     |
| ENST0. | 11q23.2 | . | .   | . | rs771.                  | .   | . | . | .     |
| ENST0. | 11q23.3 | . | .   | . | Score=203 rs755 ID=COSN | .   | . | . | .     |
| ENST0. | 11q23.3 | . | .   | . | .                       | .   | . | . | .     |
| ENST0. | 11q23.3 | . | .   | . | rs370.                  | .   | . | . | .     |
| ENST0. | 11q23.3 | . | .   | . | .                       | .   | . | . | .     |
| ENST0. | 11q23.3 | . | .   | . | .                       | .   | . | . | .     |
| ENST0. | 11q23.3 | . | .   | . | .                       | .   | . | . | .     |
| ENST0. | 11q23.3 | . | Sc. | . | .                       | .   | . | . | .     |
| ENST0. | 11q23.3 | . | .   | . | rs576.                  | .   | . | . | .     |





|         |          |     |   |                           |   |   |   |       |       |   |
|---------|----------|-----|---|---------------------------|---|---|---|-------|-------|---|
| ENST0 . | 12q24.12 | .   | . | .                         | . | . | . | .     | .     | . |
| ENST0 . | 12q24.13 | Sc. | . | rs369.                    | . | . | . | .     | .     | . |
| ENST0 . | 12q24.21 | .   | . | rs764.                    | . | . | . | .     | .     | . |
| ENST0 . | 12q24.22 | .   | . | .                         | . | . | . | .     | .     | . |
| ENST0 . | 12q24.23 | .   | . | .                         | . | . | . | .     | .     | . |
| ENST0 . | 12q24.23 | .   | . | .                         | . | . | . | .     | .     | . |
| ENST0 . | 12q24.31 | Sc. | . | rs909.                    | . | . | . | .     | .     | . |
| ENST0 . | 12q24.31 | .   | . | rs762.                    | . | . | . | .     | .     | . |
| ENST0 . | 12q24.31 | .   | . | .                         | . | . | . | .     | .     | . |
| ENST0 . | 12q24.31 | .   | . | Score=346 rs100 ID=COSN2. | . | . | . | .     | .     | . |
| ENST0 . | 12q24.31 | .   | . | .                         | . | . | . | .     | .     | . |
| ENST0 . | 12q24.31 | .   | . | .                         | . | . | . | .     | .     | . |
| ENST0 . | 12q24.31 | .   | . | Score=184.                | . | . | . | .     | .     | . |
| ENST0 . | 12q24.31 | .   | . | rs548.                    | . | . | . | .     | 2E-04 | . |
| ENST0 . | 12q24.31 | .   | . | .                         | . | . | . | .     | .     | . |
| ENST0 . | 12q24.31 | .   | . | Score=175.                | . | . | . | .     | .     | . |
| ENST0 . | 12q24.31 | Sc. | . | .                         | . | . | . | .     | .     | . |
| ENST0 . | 12q24.31 | .   | . | rs368.                    | . | . | . | .     | .     | . |
| ENST0 . | 12q24.31 | .   | . | .                         | . | . | . | .     | .     | . |
| ENST0 . | 12q24.31 | .   | . | rs186.                    | . | . | . | 0.005 | 0.001 | . |
| ENST0 . | 12q24.32 | .   | . | .                         | . | . | . | .     | .     | . |
| .       | 12q24.32 | .   | . | Score=161.                | . | . | . | .     | .     | . |
| ENST0 . | 12q24.32 | .   | . | rs775 ID=COSM2.           | . | . | . | .     | .     | . |
| ENST0 . | 12q24.33 | .   | . | rs868.                    | . | . | . | .     | .     | . |
| ENST0 . | 12q24.33 | .   | . | .                         | . | . | . | .     | .     | . |
| ENST0 . | 12q24.33 | .   | . | .                         | . | . | . | .     | .     | . |
| ENST0 . | 12q24.33 | .   | . | .                         | . | . | . | .     | .     | . |
| ENST0 . | 12q24.33 | Sc. | . | .                         | . | . | . | .     | .     | . |
| ENST0 . | 13q12.11 | .   | . | .                         | . | . | . | .     | .     | . |
| ENST0 . | 13q12.11 | .   | . | .                         | . | . | . | .     | .     | . |
| ENST0 . | 13q12.11 | .   | . | rs765 ID=COSM4.           | . | . | . | .     | .     | . |
| ENST0 . | 13q12.12 | .   | . | .                         | . | . | . | .     | .     | . |
| ENST0 . | 13q12.13 | .   | . | rs760.                    | . | . | . | .     | .     | . |
| .       | 13q12.3  | .   | . | .                         | . | . | . | .     | .     | . |
| ENST0 . | 13q13.1  | .   | . | .                         | . | . | . | .     | .     | . |
| ENST0 . | 13q13.2  | .   | . | .                         | . | . | . | .     | .     | . |
| ENST0 . | 13q13.3  | Sc. | . | .                         | . | . | . | .     | .     | . |
| ENST0 . | 13q13.3  | .   | . | .                         | . | . | . | .     | .     | . |
| ENST0 . | 13q13.3  | Sc. | . | .                         | . | . | . | .     | .     | . |
| ENST0 . | 13q14.11 | .   | . | rs113.                    | . | . | . | .     | .     | . |
| .       | 13q14.11 | .   | . | Score=843 rs926.          | . | . | . | .     | .     | . |
| ENST0 . | 13q14.13 | .   | . | .                         | . | . | . | .     | .     | . |
| ENST0 . | 13q14.13 | .   | . | rs530.                    | . | . | . | 0.003 | 6E-04 | . |
| ENST0 . | 13q14.2  | .   | . | rs775.                    | . | . | . | .     | .     | . |
| .       | 13q21.33 | .   | . | Score=564 rs535.          | . | . | . | .     | 2E-04 | . |
| ENST0 . | 13q21.33 | .   | . | .                         | . | . | . | .     | .     | . |
| ENST0 . | 13q22.2  | .   | . | .                         | . | . | . | .     | .     | . |
| ENST0 . | 13q31.3  | .   | . | rs537.                    | . | . | . | .     | 4E-04 | . |
| ENST0 . | 13q32.1  | .   | . | .                         | . | . | . | .     | .     | . |
| ENST0 . | 13q32.1  | Sc. | . | rs149.                    | . | . | . | .     | .     | . |
| ENST0 . | 13q32.3  | .   | . | rs373.                    | . | . | . | .     | .     | . |
| ENST0 . | 13q32.3  | .   | . | rs373.                    | . | . | . | .     | .     | . |
| ENST0 . | 13q33.3  | .   | . | .                         | . | . | . | .     | .     | . |
| ENST0 . | 13q33.3  | Sc. | . | rs756.                    | . | . | . | .     | .     | . |

|        |          |   |   |            |                 |   |   |       |       |
|--------|----------|---|---|------------|-----------------|---|---|-------|-------|
| ENST0. | 13q34    | . | . | .          | rs148 ID=COSM7. | . | . | .     | .     |
| ENST0. | 13q34    | . | . | .          | rs756.          | . | . | .     | .     |
| ENST0. | 13q34    | . | . | .          | .               | . | . | .     | .     |
| ENST0. | 13q34    | . | . | .          | rs100.          | . | . | .     | .     |
| ENST0. | 13q34    | . | . | .          | rs752 ID=COSN7. | . | . | .     | .     |
| ENST0. | 13q34    | . | . | .          | rs750.          | . | . | .     | .     |
| ENST0. | 13q34    | . | . | .          | rs770.          | . | . | .     | .     |
| ENST0. | 14q11.2  | . | . | Sc.        | rs879.          | . | . | .     | .     |
| ENST0. | 14q11.2  | . | . | Sc.        | .               | . | . | .     | .     |
| ENST0. | 14q11.2  | . | . | Sc.        | rs744.          | . | . | .     | .     |
| ENST0. | 14q11.2  | . | . | .          | .               | . | . | .     | .     |
| ENST0. | 14q11.2  | . | . | .          | rs145.          | . | . | .     | .     |
| ENST0. | 14q11.2  | . | . | .          | rs549.          | . | . | .     | 8E-04 |
| ENST0. | 14q11.2  | . | . | .          | .               | . | . | .     | .     |
| ENST0. | 14q11.2  | . | . | .          | rs374.          | . | . | .     | .     |
| ENST0. | 14q11.2  | . | . | .          | rs757 ID=COSM7. | . | . | .     | .     |
| ENST0. | 14q11.2  | . | . | .          | .               | . | . | .     | .     |
| ENST0. | 14q13.2  | . | . | .          | rs777.          | . | . | .     | .     |
| ENST0. | 14q13.2  | . | . | Score=205  | rs924.          | . | . | .     | .     |
| ENST0. | 14q13.2  | . | . | .          | .               | . | . | .     | .     |
| ENST0. | 14q13.2  | . | . | .          | .               | . | . | .     | .     |
| ENST0. | 14q13.3  | . | . | .          | .               | . | . | .     | .     |
| ENST0. | 14q13.3  | . | . | Sc.        | rs567.          | . | . | .     | 0.006 |
| ENST0. | 14q21.1  | . | . | .          | .               | . | . | .     | .     |
| ENST0. | 14q21.1  | . | . | .          | rs865 ID=COSM7. | . | . | .     | .     |
| ENST0. | 14q21.2  | . | . | .          | .               | . | . | .     | .     |
| ENST0. | 14q21.3  | . | . | .          | .               | . | . | .     | .     |
| ENST0. | 14q22.1  | . | . | .          | .               | . | . | .     | .     |
| ENST0. | 14q22.1  | . | . | Sc.        | rs746.          | . | . | .     | .     |
| ENST0. | 14q23.1  | . | . | .          | .               | . | . | .     | .     |
| ENST0. | 14q23.1  | . | . | .          | .               | . | . | .     | .     |
| ENST0. | 14q23.1  | . | . | .          | .               | . | . | .     | .     |
| ENST0. | 14q23.1  | . | . | .          | rs140.          | . | . | .     | .     |
| ENST0. | 14q23.2  | . | . | .          | .               | . | . | .     | .     |
| ENST0. | 14q23.3  | . | . | .          | rs540.          | . | . | .     | 2E-04 |
| ENST0. | 14q23.3  | . | . | Score=461  | rs140.          | . | . | 0.001 | 2E-04 |
| ENST0. | 14q23.3  | . | . | .          | .               | . | . | .     | .     |
| ENST0. | 14q24.1  | . | . | .          | .               | . | . | .     | .     |
| ENST0. | 14q24.3  | . | . | .          | .               | . | . | .     | .     |
| ENST0. | 14q24.3  | . | . | Sc.        | rs754.          | . | . | .     | .     |
| ENST0. | 14q24.3  | . | . | .          | rs376.          | . | . | .     | .     |
| ENST0. | 14q24.3  | . | . | Sc.        | .               | . | . | .     | .     |
| ENST0. | 14q24.3  | . | . | .          | .               | . | . | .     | .     |
| ENST0. | 14q24.3  | . | . | Score=234. | .               | . | . | .     | .     |
| ENST0. | 14q24.3  | . | . | .          | rs141.          | . | . | .     | 6E-04 |
| ENST0. | 14q32.11 | . | . | .          | .               | . | . | .     | .     |
| ENST0. | 14q32.11 | . | . | .          | .               | . | . | .     | .     |
| ENST0. | 14q32.11 | . | . | .          | rs751.          | . | . | .     | .     |
| ENST0. | 14q32.11 | . | . | .          | rs763.          | . | . | .     | .     |
| ENST0. | 14q32.11 | . | . | .          | .               | . | . | .     | .     |
| ENST0. | 14q32.12 | . | . | .          | .               | . | . | .     | .     |
| ENST0. | 14q32.12 | . | . | Score=187. | .               | . | . | .     | .     |





|         |          |   |     |                    |      |   |   |       |       |
|---------|----------|---|-----|--------------------|------|---|---|-------|-------|
| ENST0 . | 15q15.3  | . | Sc. | rs532.             | .    | . | . | .     | 2E-04 |
| ENST0 . | 15q21.1  | . | Sc. | .                  | .    | . | . | .     | .     |
| ENST0 . | 15q21.1  | . | Sc. | .                  | .    | . | . | .     | .     |
| ENST0 . | 15q21.1  | . | .   | .                  | .    | . | . | .     | .     |
| ENST0 . | 15q21.1  | . | .   | rs773.             | .    | . | . | .     | .     |
| ENST0 . | 15q21.1  | . | Sc. | rs140 ID=COSM      | Ur . | . | . | 0.001 | 4E-04 |
| ENST0 . | 15q21.1  | . | .   | .                  | .    | . | . | .     | .     |
| ENST0 . | 15q21.2  | . | .   | .                  | .    | . | . | .     | .     |
| ENST0 . | 15q21.2  | . | .   | .                  | .    | . | . | .     | .     |
| ENST0 . | 15q21.2  | . | .   | .                  | .    | . | . | .     | .     |
| ENST0 . | 15q21.2  | . | Sc. | rs368 ID=COSM      | z .  | . | . | .     | .     |
| ENST0 . | 15q21.2  | . | .   | .                  | .    | . | . | .     | .     |
| ENST0 . | 15q21.3  | . | Sc. | .                  | .    | . | . | .     | .     |
| ENST0 . | 15q22.2  | . | .   | rs779.             | .    | . | . | .     | .     |
| ENST0 . | 15q22.31 | . | .   | rs751.             | .    | . | . | .     | .     |
| ENST0 . | 15q22.31 | . | Sc. | .                  | .    | . | . | .     | .     |
| ENST0 . | 15q22.31 | . | Sc. | rs536.             | .    | . | . | 0.001 | 2E-04 |
| ENST0 . | 15q22.31 | . | .   | Score=842 .        | .    | . | . | .     | .     |
| ENST0 . | 15q22.32 | . | .   | .                  | .    | . | . | .     | .     |
| ENST0 . | 15q23    | . | .   | .                  | .    | . | . | .     | .     |
| ENST0 . | 15q23    | . | .   | rs756 ID=COSN      | 1 .  | . | . | .     | .     |
| ENST0 . | 15q23    | . | .   | .                  | .    | . | . | .     | .     |
| ENST0 . | 15q23    | . | .   | Score=233 rs546 .  | .    | . | . | 0.001 | 2E-04 |
| ENST0 . | 15q23    | . | .   | .                  | .    | . | . | .     | .     |
| ENST0 . | 15q23    | . | .   | .                  | .    | . | . | .     | .     |
| ENST0 . | 15q24.1  | . | .   | rs104 .            | .    | . | . | .     | .     |
| ENST0 . | 15q24.1  | . | .   | .                  | .    | . | . | .     | .     |
| ENST0 . | 15q24.2  | . | Sc. | .                  | .    | . | . | .     | .     |
| ENST0 . | 15q24.2  | . | Sc. | .                  | .    | . | . | .     | .     |
| ENST0 . | 15q24.3  | . | .   | rs974 .            | .    | . | . | .     | .     |
| ENST0 . | 15q24.3  | . | .   | rs104 .            | .    | . | . | .     | .     |
| ENST0 . | 15q24.3  | . | Sc. | rs878 ID=COSN      | z .  | . | . | .     | .     |
| ENST0 . | 15q24.3  | . | Sc. | .                  | .    | . | . | .     | .     |
| ENST0 . | 15q25.1  | . | Sc. | .                  | .    | . | . | .     | .     |
| ENST0 . | 15q25.1  | . | .   | rs147 ID=COSM      | k .  | . | . | .     | .     |
| ENST0 . | 15q25.1  | . | .   | Score=462 .        | .    | . | . | .     | .     |
| ENST0 . | 15q25.1  | . | .   | rs529 .            | .    | . | . | .     | 2E-04 |
| ENST0 . | 15q25.1  | . | .   | .                  | .    | . | . | .     | .     |
| ENST0 . | 15q25.2  | . | .   | rs941 .            | .    | . | . | .     | .     |
| ENST0 . | 15q25.2  | . | Sc. | rs792 ID=COSM      | t .  | . | . | .     | .     |
| ENST0 . | 15q25.3  | . | .   | .                  | .    | . | . | .     | .     |
| ENST0 . | 15q25.3  | . | .   | rs371 .            | .    | . | . | .     | .     |
| ENST0 . | 15q26.1  | . | .   | .                  | .    | . | . | .     | .     |
| ENST0 . | 15q26.1  | . | .   | Score=444 .        | .    | . | . | .     | .     |
| ENST0 . | 15q26.1  | . | Sc. | rs201 .            | .    | . | . | .     | .     |
| ENST0 . | 15q26.1  | . | .   | ID=COSM            | z .  | . | . | .     | .     |
| ENST0 . | 15q26.1  | . | .   | rs147 .            | .    | . | . | .     | .     |
| ENST0 . | 15q26.3  | . | .   | Score=26;l rs558 . | .    | . | . | 0.001 | 1E-03 |
| ENST0 . | 15q26.3  | . | .   | .                  | .    | . | . | .     | .     |
| ENST0 . | 15q26.3  | . | .   | Score=298 .        | .    | . | . | .     | .     |
| ENST0 . | 15q26.3  | . | Sc. | rs776 ID=COSM      | z .  | . | . | .     | .     |
| ENST0 . | 15q26.3  | . | .   | .                  | .    | . | . | .     | .     |
| ENST0 . | 15q26.3  | . | Sc. | .                  | .    | . | . | .     | .     |

|        |          |   |     |                           |   |      |   |       |       |
|--------|----------|---|-----|---------------------------|---|------|---|-------|-------|
| ENST0. | 15q26.3  | . | Sc. | rs368.                    | . | .    | . | .     | .     |
| ENST0. | 15q26.3  | . | Sc. | .                         | . | .    | . | .     | .     |
| ENST0. | 15q26.3  | . | Sc. | .                         | . | .    | . | .     | .     |
| ENST0. | 16p13.3  | . | .   | rs761.                    | . | .    | . | .     | .     |
| ENST0. | 16p13.3  | . | .   | .                         | . | .    | . | .     | .     |
| ENST0. | 16p13.3  | . | .   | .                         | . | .    | . | .     | .     |
| ENST0. | 16p13.3  | . | .   | Score=420 rs892.          | . | .    | . | .     | .     |
| ENST0. | 16p13.3  | . | .   | rs199.                    | . | .    | . | .     | 2E-04 |
| ENST0. | 16p13.3  | . | .   | Score=201 rs201 ID=COSN1. | . | .    | . | .     | .     |
| ENST0. | 16p13.3  | . | .   | Score=202 rs776 ID=COSM!  | . | .    | . | .     | .     |
| ENST0. | 16p13.3  | . | .   | rs146.                    | . | .    | . | .     | 2E-04 |
| ENST0. | 16p13.3  | . | .   | rs368.                    | . | .    | . | .     | .     |
| ENST0. | 16p13.3  | . | .   | .                         | . | .    | . | .     | .     |
| ENST0. | 16p13.3  | . | .   | .                         | . | .    | . | .     | .     |
| ENST0. | 16p13.3  | . | .   | rs150.                    | . | .    | . | .     | .     |
| ENST0. | 16p13.3  | . | .   | rs997.                    | . | .    | . | .     | .     |
| ENST0. | 16p13.3  | . | .   | .                         | . | .    | . | .     | .     |
| ENST0. | 16p13.3  | . | .   | rs371.                    | . | .    | . | .     | 2E-04 |
| ENST0. | 16p13.3  | . | .   | .                         | . | .    | . | .     | .     |
| ENST0. | 16p13.3  | . | .   | rs759.                    | . | .    | . | .     | .     |
| ENST0. | 16p13.3  | . | .   | .                         | . | .    | . | .     | .     |
| .      | 16p13.3  | . | .   | rs536.                    | . | .    | . | 0.002 | 4E-04 |
| ENST0. | 16p13.3  | . | Sc. | rs760.                    | . | .    | . | .     | .     |
| ENST0. | 16p13.3  | . | .   | .                         | . | .    | . | .     | .     |
| ENST0. | 16p13.3  | . | .   | rs145 ID=COSM!            | . | .    | . | .     | .     |
| ENST0. | 16p13.3  | . | .   | .                         | . | .    | . | .     | .     |
| ENST0. | 16p13.3  | . | .   | rs374.                    | . | .    | . | .     | 4E-04 |
| ENST0. | 16p13.3  | . | .   | .                         | . | .    | . | .     | .     |
| ENST0. | 16p13.3  | . | .   | rs763.                    | . | .    | . | .     | .     |
| ENST0. | 16p13.3  | . | .   | .                         | . | .    | . | .     | .     |
| ENST0. | 16p13.3  | . | .   | .                         | . | .    | . | .     | .     |
| ENST0. | 16p13.3  | . | .   | Score=756 rs141.          | . | .    | . | 0.015 | 0.003 |
| ENST0. | 16p13.3  | . | Sc. | .                         | . | .    | . | .     | .     |
| ENST0. | 16p13.3  | . | .   | rs752.                    | . | .    | . | .     | .     |
| ENST0. | 16p13.3  | . | .   | rs534.                    | . | Lik. | . | 0.008 | 0.002 |
| ENST0. | 16p13.3  | . | Sc. | .                         | . | .    | . | .     | .     |
| ENST0. | 16p13.3  | . | .   | Score=232 rs550.          | . | .    | . | 0.001 | 4E-04 |
| ENST0. | 16p13.3  | . | .   | rs189.                    | . | .    | . | .     | 2E-04 |
| ENST0. | 16p13.3  | . | .   | rs371 ID=COSM!            | . | .    | . | .     | .     |
| ENST0. | 16p13.3  | . | .   | rs201.                    | . | .    | . | .     | .     |
| ENST0. | 16p13.3  | . | .   | .                         | . | .    | . | .     | .     |
| ENST0. | 16p13.13 | . | .   | rs563 ID=COSM!            | . | .    | . | 0.001 | 2E-04 |
| ENST0. | 16p13.13 | . | .   | rs767.                    | . | .    | . | .     | .     |
| ENST0. | 16p13.13 | . | .   | rs918.                    | . | .    | . | .     | .     |
| ENST0. | 16p13.12 | . | .   | rs780.                    | . | .    | . | .     | .     |
| ENST0. | 16p13.11 | . | Sc  | Score=225 rs566.          | . | .    | . | .     | 2E-04 |
| ENST0. | 16p13.11 | . | Sc. | rs750.                    | . | .    | . | .     | .     |
| ENST0. | 16p13.11 | . | .   | .                         | . | .    | . | .     | .     |
| ENST0. | 16p13.11 | . | .   | .                         | . | .    | . | .     | .     |
| ENST0. | 16p13.11 | . | .   | Score=128.                | . | .    | . | .     | .     |
| ENST0. | 16p13.11 | . | Sc  | Sc.                       | . | .    | . | .     | .     |
| ENST0. | 16p12.3  | . | Sc. | rs178 ID=COSM!            | . | .    | . | .     | .     |
| ENST0. | 16p12.3  | . | .   | rs757.                    | . | .    | . | .     | .     |



|         |         |   |     |     |                           |       |   |   |       |       |
|---------|---------|---|-----|-----|---------------------------|-------|---|---|-------|-------|
| ENST0 . | 16q13   | . | .   | .   | Score=675 .               | .     | . | . | .     | .     |
| ENST0 . | 16q13   | . | .   | .   | .                         | .     | . | . | .     | .     |
| ENST0 . | 16q13   | . | .   | .   | rs147 .                   | .     | . | . | .     | 4E-04 |
| ENST0 . | 16q21   | . | .   | .   | Score=575 .               | .     | . | . | .     | .     |
| ENST0 . | 16q21   | . | .   | .   | .                         | .     | . | . | .     | .     |
| ENST0 . | 16q21   | . | .   | .   | .                         | .     | . | . | .     | .     |
| ENST0 . | 16q21   | . | .   | .   | Score=507 rs149 .         | .     | . | . | .     | .     |
| ENST0 . | 16q22.1 | . | .   | .   | .                         | .     | . | . | .     | .     |
| ENST0 . | 16q22.1 | . | .   | .   | Score=223 rs105 .         | .     | . | . | .     | .     |
| ENST0 . | 16q22.1 | . | .   | .   | rs771 .                   | .     | . | . | .     | .     |
| ENST0 . | 16q22.1 | . | .   | .   | rs561 .                   | .     | . | . | .     | 2E-04 |
| ENST0 . | 16q22.1 | . | .   | .   | .                         | .     | . | . | .     | .     |
| ENST0 . | 16q22.1 | . | Sc. | .   | rs754 ID=COSM .           | .     | . | . | .     | .     |
| ENST0 . | 16q22.1 | . | .   | .   | rs369 .                   | .     | . | . | .     | .     |
| ENST0 . | 16q22.1 | . | .   | .   | .                         | .     | . | . | .     | .     |
| ENST0 . | 16q22.1 | . | Sc. | .   | rs758 .                   | .     | . | . | .     | .     |
| ENST0 . | 16q22.1 | . | .   | .   | .                         | .     | . | . | .     | .     |
| ENST0 . | 16q22.1 | . | .   | .   | .                         | .     | . | . | .     | .     |
| ENST0 . | 16q22.1 | . | .   | .   | Score=235 rs867 .         | .     | . | . | .     | .     |
| ENST0 . | 16q22.2 | . | .   | .   | rs927 .                   | .     | . | . | .     | .     |
| ENST0 . | 16q22.2 | . | .   | .   | rs148 .                   | .     | . | . | .     | 1E-03 |
| ENST0 . | 16q22.2 | . | .   | .   | rs377 .                   | .     | . | . | .     | .     |
| ENST0 . | 16q23.1 | . | .   | Sc. | rs750 .                   | .     | . | . | .     | .     |
| ENST0 . | 16q23.1 | . | .   | .   | .                         | .     | . | . | .     | .     |
| ENST0 . | 16q23.1 | . | .   | .   | .                         | .     | . | . | .     | .     |
| ENST0 . | 16q23.2 | . | .   | .   | Score=870 rs146 .         | .     | . | . | 0.029 | 0.01  |
| ENST0 . | 16q23.2 | . | Sc. | .   | rs773 ID=COSNÉ .          | .     | . | . | .     | .     |
| ENST0 . | 16q23.3 | . | .   | .   | Score=228 .               | .     | . | . | .     | .     |
| ENST0 . | 16q23.3 | . | Sc. | .   | rs748 .                   | Lik . | . | . | 0.104 | 0.063 |
| ENST0 . | 16q23.3 | . | .   | .   | rs140 .                   | .     | . | . | .     | 6E-04 |
| ENST0 . | 16q24.1 | . | .   | .   | rs764 ID=COSM .           | .     | . | . | .     | .     |
| ENST0 . | 16q24.1 | . | .   | .   | Score=316 rs933 ID=COSM . | .     | . | . | .     | .     |
| ENST0 . | 16q24.1 | . | .   | .   | .                         | .     | . | . | .     | .     |
| ENST0 . | 16q24.2 | . | .   | .   | rs368 .                   | .     | . | . | 0.001 | 2E-04 |
| ENST0 . | 16q24.2 | . | .   | .   | rs966 .                   | .     | . | . | .     | .     |
| ENST0 . | 16q24.2 | . | .   | .   | rs560 .                   | .     | . | . | .     | 2E-04 |
| ENST0 . | 16q24.3 | . | .   | .   | rs964 .                   | .     | . | . | .     | .     |
| ENST0 . | 16q24.3 | . | Sc. | .   | .                         | .     | . | . | .     | .     |
| ENST0 . | 16q24.3 | . | .   | .   | .                         | .     | . | . | .     | .     |
| ENST0 . | 16q24.3 | . | .   | .   | rs201 .                   | .     | . | . | 0.001 | 2E-04 |
| ENST0 . | 16q24.3 | . | .   | .   | rs753 .                   | .     | . | . | .     | .     |
| ENST0 . | 17p13.3 | . | .   | .   | rs762 .                   | .     | . | . | .     | .     |
| ENST0 . | 17p13.3 | . | Sc. | .   | .                         | .     | . | . | .     | .     |
| ENST0 . | 17p13.3 | . | .   | .   | .                         | .     | . | . | .     | .     |
| ENST0 . | 17p13.3 | . | Sc. | .   | .                         | .     | . | . | .     | .     |
| ENST0 . | 17p13.3 | . | .   | .   | .                         | .     | . | . | .     | .     |
| ENST0 . | 17p13.3 | . | .   | .   | .                         | .     | . | . | .     | .     |
| ENST0 . | 17p13.3 | . | .   | .   | rs780 .                   | .     | . | . | .     | .     |
| ENST0 . | 17p13.3 | . | .   | .   | .                         | .     | . | . | .     | .     |
| ENST0 . | 17p13.2 | . | .   | .   | .                         | .     | . | . | .     | .     |
| ENST0 . | 17p13.2 | . | .   | .   | .                         | .     | . | . | .     | .     |
| ENST0 . | 17p13.2 | . | .   | .   | rs550 .                   | .     | . | . | 0.001 | 4E-04 |
| ENST0 . | 17p13.2 | . | Sc. | .   | rs376 .                   | .     | . | . | .     | .     |

|        |         |            |                           |       |             |
|--------|---------|------------|---------------------------|-------|-------------|
| ENST0. | 17p13.2 | . Scc Scc. | rs200 ID=COSM.            | . . . | 2E-04       |
| ENST0. | 17p13.2 | . . Scc.   | rs201 ID=COSM.            | . . . |             |
| ENST0. | 17p13.2 | . . .      | Score=186.                | . . . |             |
| ENST0. | 17p13.2 | . . .      |                           | . . . |             |
| ENST0. | 17p13.1 | . . .      |                           | . . . |             |
| ENST0. | 17p13.1 | . . .      | Score=573.                | . . . |             |
| ENST0. | 17p13.1 | . Scc.     | rs200.                    | . . . | 1E-03       |
| ENST0. | 17p13.1 | . . .      | rs745.                    | . . . |             |
| ENST0. | 17p13.1 | . Scc.     | rs147.                    | . . . |             |
| ENST0. | 17p13.1 | . . .      |                           | . . . |             |
| ENST0. | 17p13.1 | . . .      |                           | . . . |             |
| ENST0. | 17p12   | . . .      | rs753.                    | . . . |             |
| ENST0. | 17p12   | . . .      |                           | . . . |             |
| ENST0. | 17p12   | . . .      |                           | . . . |             |
| ENST0. | 17p12   | . . .      | rs763.                    | . . . |             |
| ENST0. | 17p12   | . Scc.     | rs620.                    | . . . |             |
| ENST0. | 17p12   | . Scc.     |                           | . . . |             |
| ENST0. | 17p12   | . . .      |                           | . . . |             |
| ENST0. | 17p11.2 | . . .      |                           | . . . |             |
| ENST0. | 17p11.2 | . . .      |                           | . . . |             |
| ENST0. | 17p11.2 | . . .      | rs115.                    | . . . | 0.002       |
| ENST0. | 17p11.2 | . . .      |                           | . . . |             |
| ENST0. | 17p11.2 | . Scc.     |                           | . . . |             |
| ENST0. | 17p11.2 | . Scc Scc. |                           | . . . |             |
| ENST0. | 17p11.2 | . Scc.     | rs286 ID=COSN.            | . . . | 0.654 0.875 |
| ENST0. | 17p11.2 | . . .      | rs752.                    | . . . |             |
| ENST0. | 17p11.2 | . . .      |                           | . . . |             |
| ENST0. | 17q11.2 | . Scc.     |                           | . . . |             |
| ENST0. | 17q11.2 | . . .      |                           | . . . |             |
| ENST0. | 17q11.2 | . . .      |                           | . . . |             |
| ENST0. | 17q11.2 | . . .      |                           | . . . |             |
| ENST0. | 17q11.2 | . . .      | Score=857.                | . . . |             |
| ENST0. | 17q11.2 | . . .      | rs105.                    | . . . |             |
| ENST0. | 17q11.2 | . . .      |                           | . . . |             |
| ENST0. | 17q11.2 | . . .      |                           | . . . |             |
| ENST0. | 17q11.2 | . Scc.     |                           | . . . |             |
| ENST0. | 17q11.2 | . . .      | Score=959 rs796 ID=COSN1. | . . . |             |
| ENST0. | 17q11.2 | . Scc.     | rs532.                    | . . . | 2E-04       |
| ENST0. | 17q11.2 | . . .      |                           | . . . |             |
| ENST0. | 17q11.2 | . . .      |                           | . . . |             |
| ENST0. | 17q11.2 | . . .      |                           | . . . |             |
| ENST0. | 17q12   | . . .      |                           | . . . |             |
| ENST0. | 17q12   | . Scc.     |                           | . . . |             |
| ENST0. | 17q12   | . Scc.     | rs761 ID=COSM.            | . . . |             |
| ENST0. | 17q12   | . Scc.     |                           | . . . |             |
| ENST0. | 17q12   | . . .      |                           | . . . |             |
| ENST0. | 17q12   | . Scc.     | rs370.                    | . . . |             |
| ENST0. | 17q12   | . Scc      | Score=173 rs372.          | . . . |             |
| ENST0. | 17q12   | . Scc.     | ID=COSN1.                 | . . . |             |
| ENST0. | 17q12   | . . .      | rs754.                    | . . . |             |
| ENST0. | 17q12   | . . .      | Score=308.                | . . . |             |
| ENST0. | 17q12   | . . .      | rs780.                    | . . . |             |
| ENST0. | 17q12   | . . .      |                           | . . . |             |
| ENST0. | 17q12   | . . .      |                           | . . . |             |



|        |          |     |                 |           |  |       |       |
|--------|----------|-----|-----------------|-----------|--|-------|-------|
| ENST0. | 17q25.1  | Sc. | rs369.          |           |  |       |       |
| ENST0. | 17q25.1  |     |                 |           |  |       |       |
| ENST0. | 17q25.2  |     |                 |           |  |       |       |
| ENST0. | 17q25.2  |     | rs767.          |           |  |       |       |
| ENST0. | 17q25.3  |     |                 |           |  |       |       |
| ENST0. | 17q25.3  | Sc. | rs752.          |           |  |       |       |
| ENST0. | 17q25.3  | Sc. |                 |           |  |       |       |
| ENST0. | 17q25.3  |     | rs535 ID=COSMf. |           |  |       | 2E-04 |
| ENST0. | 17q25.3  |     | rs773.          |           |  |       |       |
| ENST0. | 17q25.3  |     | rs367.          |           |  |       |       |
| ENST0. | 17q25.3  |     |                 |           |  |       |       |
| ENST0. | 17q25.3  |     |                 |           |  |       |       |
| ENST0. | 17q25.3  |     |                 |           |  |       |       |
| ENST0. | 17q25.3  |     | rs367.          |           |  |       |       |
| ENST0. | 17q25.3  |     |                 | ID=COSMf. |  |       |       |
| ENST0. | 17q25.3  |     |                 |           |  |       |       |
| ENST0. | 17q25.3  |     |                 |           |  |       |       |
| ENST0. | 17q25.3  |     |                 |           |  |       |       |
| ENST0. | 17q25.3  |     | rs759 ID=COSMf. |           |  |       |       |
| ENST0. | 17q25.3  |     |                 |           |  |       |       |
| ENST0. | 17q25.3  | Sc. | rs145 ID=COSMf. |           |  |       |       |
| ENST0. | 17q25.3  |     |                 |           |  |       |       |
| ENST0. | 18p11.32 |     |                 |           |  |       |       |
| ENST0. | 18p11.32 |     |                 |           |  |       |       |
| ENST0. | 18p11.21 |     |                 |           |  |       |       |
| ENST0. | 18p11.21 |     | Score=238.      | ID=COSN1. |  |       |       |
| ENST0. | 18p11.21 |     |                 |           |  |       |       |
| ENST0. | 18p11.21 | Sc. |                 |           |  |       |       |
| ENST0. | 18p11.21 | Sc. |                 | ID=COSN1. |  |       |       |
| ENST0. | 18q11.2  |     |                 |           |  |       |       |
| ENST0. | 18q11.2  |     | rs139.          |           |  |       | 2E-04 |
| ENST0. | 18q11.2  |     | Score=173.      |           |  |       |       |
| ENST0. | 18q11.2  |     | rs545.          |           |  | 0.001 | 2E-04 |
| ENST0. | 18q12.1  |     | rs779.          |           |  |       |       |
| ENST0. | 18q12.2  |     |                 |           |  |       |       |
| ENST0. | 18q12.3  |     |                 |           |  |       |       |
| ENST0. | 18q21.1  |     | rs778.          |           |  |       |       |
| ENST0. | 18q21.1  |     |                 |           |  |       |       |
| ENST0. | 18q21.1  |     | rs771.          |           |  |       |       |
| ENST0. | 18q21.1  |     |                 |           |  |       |       |
| ENST0. | 18q21.32 | Sc. |                 |           |  |       |       |
| ENST0. | 18q21.33 |     |                 |           |  |       |       |
| ENST0. | 18q21.33 |     | rs141.          |           |  |       | 4E-04 |
| ENST0. | 18q21.33 | Sc. |                 |           |  |       |       |
| ENST0. | 18q22.2  |     |                 | ID=COSMf. |  |       |       |
| ENST0. | 18q22.3  |     |                 |           |  |       |       |
| ENST0. | 18q23    |     |                 |           |  |       |       |
| ENST0. | 19p13.3  |     | rs102.          |           |  |       |       |
| ENST0. | 19p13.3  |     |                 | ID=COSNf. |  |       |       |
| ENST0. | 19p13.3  |     | rs374.          |           |  |       |       |
| ENST0. | 19p13.3  |     | rs778.          |           |  |       |       |











|        |          |     |                  |                           |                  |   |   |       |       |
|--------|----------|-----|------------------|---------------------------|------------------|---|---|-------|-------|
| ENST0. | 20q12    | .   | .                | .                         | rs376 ID=COSM4.  | . | . | .     | .     |
| ENST0. | 20q13.12 | .   | .                | .                         | .                | . | . | .     | .     |
| ENST0. | 20q13.12 | .   | .                | .                         | .                | . | . | .     | .     |
| ENST0. | 20q13.12 | .   | .                | .                         | Score=167.       | . | . | .     | .     |
| ENST0. | 20q13.12 | .   | .                | .                         | .                | . | . | .     | .     |
| ENST0. | 20q13.12 | .   | .                | .                         | .                | . | . | .     | .     |
| ENST0. | 20q13.12 | Sc. | .                | .                         | ID=COSM4.        | . | . | .     | .     |
| ENST0. | 20q13.13 | .   | .                | .                         | ID=COSM4.        | . | . | .     | .     |
| ENST0. | 20q13.2  | .   | .                | .                         | .                | . | . | .     | .     |
| ENST0. | 20q13.2  | .   | .                | .                         | .                | . | . | .     | .     |
| ENST0. | 20q13.2  | .   | .                | .                         | rs889.           | . | . | .     | .     |
| .      | 20q13.2  | .   | .                | .                         | Score=865 rs866. | . | . | .     | .     |
| ENST0. | 20q13.32 | .   | .                | .                         | .                | . | . | .     | .     |
| ENST0. | 20q13.32 | .   | .                | .                         | .                | . | . | .     | .     |
| ENST0. | 20q13.33 | .   | .                | .                         | .                | . | . | .     | .     |
| ENST0. | 20q13.33 | .   | .                | .                         | rs770.           | . | . | .     | .     |
| ENST0. | 20q13.33 | .   | .                | .                         | rs778.           | . | . | .     | .     |
| ENST0. | 20q13.33 | .   | .                | .                         | rs181.           | . | . | 0.002 | 4E-04 |
| ENST0. | 20q13.33 | Sc. | .                | .                         | rs143.           | . | . | .     | 0.002 |
| ENST0. | 20q13.33 | .   | .                | .                         | .                | . | . | .     | .     |
| ENST0. | 20q13.33 | .   | .                | .                         | .                | . | . | .     | .     |
| ENST0. | 20q13.33 | .   | .                | .                         | rs546 ID=COSM4.  | . | . | .     | 2E-04 |
| ENST0. | 21p11.2  | .   | Sc.              | .                         | rs796.           | . | . | .     | .     |
| .      | 21p11.2  | .   | Sc.              | .                         | .                | . | . | .     | .     |
| .      | 21p11.2  | .   | Sc               | Score=298.                | .                | . | . | .     | .     |
| .      | 21p11.2  | .   | Sc               | Score=348.                | .                | . | . | .     | .     |
| ENST0. | 21p11.2  | .   | Sc               | Score=333 rs868.          | .                | . | . | .     | .     |
| ENST0. | 21p11.2  | .   | Sc               | Score=333 rs371.          | .                | . | . | .     | .     |
| .      | 21p11.2  | .   | Sc.              | rs377 ID=COSN1.           | .                | . | . | .     | .     |
| ENST0. | 21p11.1  | .   | Sc               | Score=756.                | .                | . | . | .     | .     |
| ENST0. | 21p11.1  | .   | Sc.              | .                         | .                | . | . | .     | .     |
| ENST0. | 21p11.1  | .   | Sc.              | rs528.                    | .                | . | . | .     | 2E-04 |
| .      | 21p11.1  | .   | Sc               | Score=144.                | .                | . | . | .     | .     |
| .      | 21p11.1  | .   | Sc               | Score=263 rs665.          | .                | . | . | .     | .     |
| .      | 21p11.1  | .   | Sc               | Score=263 rs658 ID=COSN1. | .                | . | . | .     | .     |
| ENST0. | 21p11.1  | .   | Sc.              | rs915 ID=COSN1.           | .                | . | . | .     | .     |
| ENST0. | 21q11.2  | .   | Sc               | Score=247.                | .                | . | . | .     | .     |
| ENST0. | 21q11.2  | .   | Sc.              | ID=COSM4.                 | .                | . | . | .     | .     |
| ENST0. | 21q21.1  | .   | .                | Score=297.                | .                | . | . | .     | .     |
| ENST0. | 21q21.3  | .   | .                | .                         | .                | . | . | .     | .     |
| ENST0. | 21q21.3  | .   | .                | .                         | .                | . | . | .     | .     |
| ENST0. | 21q21.3  | .   | .                | .                         | rs917.           | . | . | .     | .     |
| ENST0. | 21q22.11 | .   | .                | .                         | .                | . | . | .     | .     |
| ENST0. | 21q22.11 | .   | .                | Score=160.                | .                | . | . | .     | .     |
| ENST0. | 21q22.11 | .   | .                | .                         | .                | . | . | .     | .     |
| ENST0. | 21q22.11 | .   | .                | .                         | rs103.           | . | . | .     | .     |
| ENST0. | 21q22.11 | Sc. | Score=261.       | .                         | .                | . | . | .     | .     |
| ENST0. | 21q22.11 | .   | .                | .                         | rs758.           | . | . | .     | .     |
| ENST0. | 21q22.11 | .   | .                | .                         | .                | . | . | .     | .     |
| ENST0. | 21q22.12 | .   | .                | Score=454.                | .                | . | . | .     | .     |
| ENST0. | 21q22.13 | .   | .                | .                         | .                | . | . | .     | .     |
| ENST0. | 21q22.13 | Sc. | Score=453 rs558. | .                         | .                | . | . | .     | .     |
| ENST0. | 21q22.2  | .   | .                | .                         | rs759.           | . | . | .     | .     |
| ENST0. | 21q22.2  | .   | .                | .                         | rs758 ID=COSM4.  | . | . | .     | .     |



|         |          |   |     |            |                 |   |   |       |       |
|---------|----------|---|-----|------------|-----------------|---|---|-------|-------|
| ENST0 . | 22q12.3  | . | .   | .          | rs536.          | . | . | .     | 2E-04 |
| ENST0 . | 22q13.1  | . | Sc. | .          | .               | . | . | .     | .     |
| ENST0 . | 22q13.1  | . | .   | .          | .               | . | . | .     | .     |
| ENST0 . | 22q13.1  | . | .   | .          | rs752.          | . | . | .     | .     |
| ENST0 . | 22q13.1  | . | Sc. | .          | ID=COSM.        | . | . | .     | .     |
| ENST0 . | 22q13.1  | . | Sc. | .          | ID=COSM.        | . | . | .     | .     |
| ENST0 . | 22q13.1  | . | .   | .          | rs571.          | . | . | 0.001 | 2E-04 |
| ENST0 . | 22q13.1  | . | Sc. | .          | .               | . | . | .     | .     |
| ENST0 . | 22q13.1  | . | .   | Score=701  | rs371.          | . | . | 0.005 | 1E-03 |
| ENST0 . | 22q13.1  | . | .   | .          | .               | . | . | .     | .     |
| ENST0 . | 22q13.2  | . | .   | .          | rs201.          | . | . | .     | .     |
| ENST0 . | 22q13.2  | . | Sc. | .          | .               | . | . | .     | .     |
| ENST0 . | 22q13.2  | . | .   | .          | rs183.          | . | . | .     | 2E-04 |
| ENST0 . | 22q13.2  | . | .   | .          | .               | . | . | .     | .     |
| ENST0 . | 22q13.2  | . | Sc. | .          | .               | . | . | .     | .     |
| ENST0 . | 22q13.2  | . | .   | .          | rs191 ID=COSN.  | . | . | .     | 2E-04 |
| ENST0 . | 22q13.31 | . | .   | .          | .               | . | . | .     | .     |
| ENST0 . | 22q13.31 | . | Sc. | .          | rs558.          | . | . | 0.001 | 2E-04 |
| ENST0 . | 22q13.31 | . | .   | .          | rs130 ID=COSN1. | . | . | .     | .     |
| ENST0 . | 22q13.31 | . | .   | .          | .               | . | . | .     | .     |
| ENST0 . | 22q13.31 | . | .   | .          | .               | . | . | .     | .     |
| ENST0 . | 22q13.31 | . | .   | .          | .               | . | . | .     | .     |
| ENST0 . | 22q13.31 | . | .   | .          | .               | . | . | .     | .     |
| ENST0 . | 22q13.31 | . | .   | .          | .               | . | . | .     | .     |
| ENST0 . | 22q13.31 | . | .   | .          | .               | . | . | .     | .     |
| ENST0 . | 22q13.33 | . | .   | .          | .               | . | . | .     | .     |
| ENST0 . | 22q13.33 | . | .   | .          | .               | . | . | .     | .     |
| ENST0 . | 22q13.33 | . | Sc. | .          | rs559.          | . | . | .     | .     |
| ENST0 . | 22q13.33 | . | .   | .          | .               | . | . | .     | .     |
| ENST0 . | 22q13.33 | . | Sc. | .          | .               | . | . | .     | .     |
| ENST0 . | 22q13.33 | . | .   | .          | rs370.          | . | . | 0.001 | 2E-04 |
| ENST0 . | 22q13.33 | . | Sc. | .          | .               | . | . | .     | .     |
| ENST0 . | 22q13.33 | . | Sc. | .          | ID=COSM.        | . | . | .     | .     |
| ENST0 . | 22q13.33 | . | .   | .          | rs980.          | . | . | .     | .     |
| ENST0 . | Xp22.33  | . | Sc. | .          | .               | . | . | .     | .     |
| ENST0 . | Xp22.33  | . | Sc. | .          | .               | . | . | .     | .     |
| ENST0 . | Xp22.33  | . | Sc. | .          | .               | . | . | .     | .     |
| ENST0 . | Xp22.32  | . | .   | Score=240. | .               | . | . | .     | .     |
| ENST0 . | Xp22.2   | . | .   | .          | .               | . | . | .     | .     |
| ENST0 . | Xp22.2   | . | .   | .          | .               | . | . | .     | .     |
| ENST0 . | Xp22.2   | . | .   | .          | .               | . | . | .     | .     |
| ENST0 . | Xp22.13  | . | Sc. | .          | .               | . | . | .     | .     |
| ENST0 . | Xp22.12  | . | Sc. | .          | .               | . | . | .     | .     |
| ENST0 . | Xp22.11  | . | .   | .          | rs373.          | . | . | .     | .     |
| ENST0 . | Xp21.3   | . | .   | .          | .               | . | . | .     | .     |
| ENST0 . | Xp21.3   | . | .   | Score=121. | .               | . | . | .     | .     |
| ENST0 . | Xp21.3   | . | .   | .          | .               | . | . | .     | .     |
| ENST0 . | Xp21.2   | . | .   | .          | .               | . | . | .     | .     |
| ENST0 . | Xp21.2   | . | .   | .          | .               | . | . | .     | .     |
| ENST0 . | Xp21.2   | . | .   | .          | .               | . | . | .     | .     |
| ENST0 . | Xp21.2   | . | .   | .          | .               | . | . | .     | .     |
| ENST0 . | Xp21.1   | . | .   | .          | .               | . | . | .     | .     |
| ENST0 . | Xp21.1   | . | .   | .          | .               | . | . | .     | .     |
| ENST0 . | Xp11.4   | . | .   | .          | .               | . | . | .     | .     |
| ENST0 . | Xp11.4   | . | Sc. | .          | .               | . | . | .     | .     |











|        |          |   |   |     |                    |   |   |       |       |       |
|--------|----------|---|---|-----|--------------------|---|---|-------|-------|-------|
| ENST0. | 10p15.3  | . | . | .   | .                  | . | . | .     | .     | .     |
| ENST0. | 10p15.2  | . | . | .   | .                  | . | . | .     | .     | .     |
| ENST0. | 10q23.2  | . | . | Sc. | rs312.             | . | . | 0.527 | 0.524 | 0.433 |
| ENST0. | 10q26.3  | . | . | .   | .                  | . | . | .     | .     | .     |
| ENST0. | 11p15.4  | . | . | Sc. | .                  | . | . | .     | .     | .     |
| ENST0. | 11p15.1  | . | . | .   | .                  | . | . | .     | .     | .     |
| ENST0. | 11p11.2  | . | . | .   | .                  | . | . | .     | .     | .     |
| ENST0. | 11q12.3  | . | . | .   | .                  | . | . | .     | .     | .     |
| ENST0. | 11q14.1  | . | . | .   | .                  | . | . | .     | .     | .     |
| ENST0. | 11q23.3  | . | . | .   | .                  | . | . | .     | .     | .     |
| ENST0. | 11q24.1  | . | . | .   | .                  | . | . | .     | .     | .     |
| ENST0. | 12p13.33 | . | . | Sc. | rs538 ID=COSN1.    | . | . | 0.402 | 0.375 | 0.205 |
| ENST0. | 12p13.1  | . | . | Sc. | .                  | . | . | .     | .     | .     |
| ENST0. | 12p11.23 | . | . | .   | .                  | . | . | .     | .     | .     |
| ENST0. | 12q14.2  | . | . | .   | rs865 ID=COSN2.    | . | . | .     | .     | .     |
| ENST0. | 12q21.31 | . | . | .   | Score=660.         | . | . | .     | .     | .     |
| ENST0. | 12q24.13 | . | . | .   | .                  | . | . | .     | .     | .     |
| ENST0. | 12q24.22 | . | . | .   | rs770.             | . | . | .     | .     | .     |
| ENST0. | 13q12.3  | . | . | .   | .                  | . | . | .     | .     | .     |
| ENST0. | 13q13.1  | . | . | .   | rs370.             | . | . | 0.    | .     | 4E-04 |
| ENST0. | 13q13.3  | . | . | .   | rs412 ID=COSM! Ur. | . | . | 0.    | .     | 4E-04 |
| ENST0. | 13q13.3  | . | . | .   | .                  | . | . | .     | .     | .     |
| ENST0. | 13q21.2  | . | . | .   | ID=COSM!.          | . | . | .     | .     | .     |
| ENST0. | 13q22.3  | . | . | .   | .                  | . | . | .     | .     | .     |
| ENST0. | 13q22.3  | . | . | .   | .                  | . | . | .     | .     | .     |
| ENST0. | 13q33.1  | . | . | .   | .                  | . | . | .     | .     | .     |
| ENST0. | 14q11.2  | . | . | .   | rs369.             | . | . | .     | .     | .     |
| ENST0. | 14q13.2  | . | . | .   | Score=222 rs766.   | . | . | .     | .     | .     |
| ENST0. | 14q32.12 | . | . | Sc. | .                  | . | . | .     | .     | .     |
| ENST0. | 14q32.13 | . | . | .   | .                  | . | . | .     | .     | .     |
| ENST0. | 14q32.33 | . | . | .   | rs121 ID=COSM! Pa. | . | . | .     | .     | .     |
| ENST0. | 14q32.33 | . | . | Sc. | .                  | . | . | .     | .     | .     |
| ENST0. | 15q11.1  | . | . | Sc. | rs493 ID=COSM!.    | . | . | .     | .     | .     |
| .      | 15q11.2  | . | . | Sc  | Score=254 rs749.   | . | . | .     | .     | .     |
| ENST0. | 15q11.2  | . | . | Sc. | rs107 ID=COSN1.    | . | . | .     | .     | .     |
| ENST0. | 15q11.2  | . | . | Sc  | Score=559 rs182.   | . | . | 0.086 | 0.088 | 0.073 |
| ENST0. | 15q11.2  | . | . | .   | .                  | . | . | .     | .     | .     |
| ENST0. | 15q15.1  | . | . | .   | Score=227 rs186.   | . | . | 0.003 | 0.002 | 4E-04 |
| ENST0. | 15q21.1  | . | . | .   | rs995 ID=COSM!.    | . | . | .     | .     | .     |
| ENST0. | 15q21.1  | . | . | .   | Score=512.         | . | . | .     | .     | .     |
| ENST0. | 15q23    | . | . | .   | .                  | . | . | .     | .     | .     |
| ENST0. | 15q25.1  | . | . | .   | .                  | . | . | .     | .     | .     |
| ENST0. | 15q25.1  | . | . | Sc  | Score=444.         | . | . | .     | .     | .     |
| ENST0. | 16p13.3  | . | . | .   | ID=COSM!.          | . | . | .     | .     | .     |
| .      | 16p11.2  | . | . | Sc. | .                  | . | . | .     | .     | .     |
| ENST0. | 16q12.2  | . | . | .   | rs775.             | . | . | .     | .     | .     |
| ENST0. | 16q22.2  | . | . | .   | Score=212.         | . | . | .     | .     | .     |
| ENST0. | 17p13.2  | . | . | .   | .                  | . | . | .     | .     | .     |
| ENST0. | 17q12    | . | . | .   | rs781 ID=COSM!.    | . | . | .     | .     | .     |
| ENST0. | 17q21.31 | . | . | .   | rs150.             | . | . | 0.    | .     | 0.001 |
| ENST0. | 17q21.32 | . | . | .   | .                  | . | . | .     | .     | .     |
| ENST0. | 17q25.3  | . | . | .   | rs374.             | . | . | 0.002 | 0.002 | 4E-04 |
| ENST0. | 17q25.3  | . | . | .   | rs561.             | . | . | .     | .     | .     |
| ENST0. | 17q25.3  | . | . | Sc. | rs550.             | . | . | 0.    | .     | 2E-04 |

|        |          |   |    |           |            |           |           |   |       |       |       |   |   |
|--------|----------|---|----|-----------|------------|-----------|-----------|---|-------|-------|-------|---|---|
| ENST0. | 18p11.21 | . | .  | Sc        | Score=468  | rs199     | ID=COSN2. | . | .     | .     | .     | . | . |
| ENST0. | 18q21.31 | . | .  | .         | .          | .         | .         | . | .     | .     | .     | . | . |
| ENST0. | 19p13.2  | . | .  | .         | .          | .         | .         | . | .     | .     | .     | . | . |
| ENST0. | 19p13.11 | . | .  | .         | .          | .         | .         | . | .     | .     | .     | . | . |
| ENST0. | 19p13.11 | . | Sc | .         | .          | .         | .         | . | .     | .     | .     | . | . |
| ENST0. | 19p13.11 | . | .  | Sc        | .          | .         | .         | . | .     | .     | .     | . | . |
| ENST0. | 19q13.12 | . | .  | .         | .          | .         | .         | . | .     | .     | .     | . | . |
| ENST0. | 19q13.12 | . | .  | .         | .          | .         | .         | . | .     | .     | .     | . | . |
| ENST0. | 19q13.2  | . | .  | .         | .          | .         | ID=COSM1. | . | .     | .     | .     | . | . |
| ENST0. | 19q13.31 | . | .  | Sc        | .          | .         | .         | . | .     | .     | .     | . | . |
| ENST0. | 19q13.42 | . | .  | .         | .          | .         | .         | . | .     | .     | .     | . | . |
| ENST0. | 20p13    | . | .  | .         | .          | .         | .         | . | .     | .     | .     | . | . |
| ENST0. | 20p13    | . | .  | .         | .          | .         | .         | . | .     | .     | .     | . | . |
| ENST0. | 20p12.3  | . | Sc | .         | .          | rs143.    | .         | . | .     | .     | .     | . | . |
| ENST0. | 20q11.21 | . | .  | .         | .          | .         | .         | . | .     | .     | .     | . | . |
| ENST0. | 20q11.23 | . | .  | .         | Score=579. | .         | .         | . | .     | .     | .     | . | . |
| ENST0. | 21p11.1  | . | .  | Sc        | .          | rs117     | ID=COSN1. | . | .     | .     | .     | . | . |
| ENST0. | 21q21.1  | . | .  | .         | .          | .         | .         | . | .     | .     | .     | . | . |
| ENST0. | 22q11.21 | . | .  | .         | .          | .         | .         | . | .     | .     | .     | . | . |
| ENST0. | 22q12.2  | . | .  | .         | .          | .         | .         | . | .     | .     | .     | . | . |
| ENST0. | 22q13.1  | . | Sc | .         | .          | .         | .         | . | .     | .     | .     | . | . |
| ENST0. | Xp22.33  | . | .  | .         | .          | rs750     | ID=COSM1. | . | .     | .     | .     | . | . |
| ENST0. | Xp21.3   | . | Sc | .         | .          | .         | .         | . | .     | .     | .     | . | . |
| ENST0. | Xp11.3   | . | .  | Sc        | .          | .         | .         | . | .     | .     | .     | . | . |
| ENST0. | Xq13.1   | . | .  | .         | .          | .         | .         | . | .     | .     | .     | . | . |
| ENST0. | Xq24     | . | Sc | .         | .          | .         | .         | . | .     | .     | .     | . | . |
| .      | Xq27.1   | . | .  | .         | .          | .         | .         | . | .     | .     | .     | . | . |
| .      | Xq27.1   | . | .  | .         | .          | .         | .         | . | .     | .     | .     | . | . |
| ENST0. | Xq28     | . | Sc | .         | .          | .         | .         | . | .     | .     | .     | . | . |
| ENST0. | Xq28     | . | .  | .         | .          | .         | .         | . | .     | .     | .     | . | . |
| .      | .        | . | .  | .         | .          | .         | .         | . | .     | .     | .     | . | . |
| ENST0. | 1p36.33  | . | .  | Sc        | .          | rs114.    | .         | . | .     | .     | .     | . | . |
| ENST0. | 1p36.11  | . | Sc | .         | .          | .         | .         | . | .     | .     | .     | . | . |
| ENST0. | 1p31.1   | . | .  | .         | .          | .         | .         | . | .     | .     | .     | . | . |
| ENST0. | 1p22.3   | . | Sc | .         | .          | .         | .         | . | .     | .     | .     | . | . |
| ENST0. | 1p11.2   | . | .  | Sc        | .          | rs199.    | .         | . | .     | .     | .     | . | . |
| ENST0. | 1q21.1   | . | .  | Sc        | .          | rs866     | ID=COSN1. | . | .     | .     | .     | . | . |
| ENST0. | 2p16.2   | . | .  | .         | .          | .         | .         | . | .     | .     | .     | . | . |
| ENST0. | 2p14     | . | .  | .         | .          | .         | .         | . | .     | .     | .     | . | . |
| ENST0. | 2p11.2   | . | .  | .         | .          | .         | .         | . | .     | .     | .     | . | . |
| ENST0. | 2q14.2   | . | .  | .         | .          | rs370.    | .         | . | .     | .     | .     | . | . |
| ENST0. | 2q21.3   | . | .  | .         | Score=22;  | rs200     | ID=COSN1. | . | 0.    | .     | 0.007 | . | . |
| ENST0. | 2q24.3   | . | .  | .         | .          | rs904.    | .         | . | .     | .     | .     | . | . |
| ENST0. | 2q35     | . | .  | .         | .          | rs370.    | .         | . | .     | .     | .     | . | . |
| ENST0. | 2q37.1   | . | .  | .         | .          | rs557.    | .         | . | 0.    | .     | .     | . | . |
| ENST0. | 3p24.3   | . | .  | .         | Score=601  | rs144.    | .         | . | 0.078 | 0.081 | 0.102 | . | . |
| ENST0. | 3p22.2   | . | .  | .         | .          | .         | .         | . | .     | .     | .     | . | . |
| ENST0. | 3q13.31  | . | .  | .         | .          | .         | .         | . | .     | .     | .     | . | . |
| ENST0. | 3q13.31  | . | .  | .         | .          | rs201     | ID=COSM1. | . | .     | .     | .     | . | . |
| ENST0. | 4p15.33  | . | .  | .         | .          | rs116.    | .         | . | 0.    | .     | 0.014 | . | . |
| .      | 4p11     | . | Sc | .         | .          | rs469     | ID=COSN1. | . | .     | .     | .     | . | . |
| .      | 4p11     | . | Sc | Score=430 | rs469      | ID=COSN1. | .         | . | .     | .     | .     | . | . |
| ENST0. | 4q13.3   | . | .  | .         | .          | rs749     | ID=COSM1. | . | .     | .     | .     | . | . |
| ENST0. | 4q35.1   | . | .  | .         | .          | rs775     | ID=COSM1. | . | .     | .     | .     | . | . |

|        |          |   |     |                           |   |       |       |       |
|--------|----------|---|-----|---------------------------|---|-------|-------|-------|
| ENST0. | 5q31.3   | . | Sc. | ID=COSM                   | . | .     | .     | .     |
| ENST0. | 6p21.33  | . | .   | rs116.                    | . | .     | .     | .     |
| ENST0. | 6q14.1   | . | .   | .                         | . | .     | .     | .     |
| ENST0. | 6q14.1   | . | Sc. | .                         | . | .     | .     | .     |
| ENST0. | 6q21     | . | .   | rs757.                    | . | .     | .     | .     |
| ENST0. | 7p22.1   | . | .   | .                         | . | .     | .     | .     |
| ENST0. | 7q21.12  | . | .   | .                         | . | .     | .     | .     |
| ENST0. | 7q22.1   | . | Sc. | .                         | . | .     | .     | .     |
| ENST0. | 8p22     | . | Sc. | rs772.                    | . | .     | .     | .     |
| ENST0. | 8q24.3   | . | .   | .                         | . | .     | .     | .     |
| ENST0. | 9q34.3   | . | .   | rs750 ID=COSM             | . | .     | .     | .     |
| ENST0. | 10p14    | . | Sc. | .                         | . | .     | .     | .     |
| ENST0. | 10p13    | . | .   | rs757 ID=COSM             | . | .     | .     | .     |
| ENST0. | 10p11.1  | . | Sc. | rs565.                    | . | 0     | 0.001 | 0.002 |
| ENST0. | 10q22.1  | . | .   | Score=246 rs790 ID=COSN1. | . | 0.347 | 0.355 | 0.327 |
| ENST0. | 10q23.31 | . | .   | .                         | . | .     | .     | .     |
| ENST0. | 10q24.32 | . | .   | rs970.                    | . | .     | .     | .     |
| ENST0. | 10q24.32 | . | .   | rs772.                    | . | .     | .     | .     |
| ENST0. | 10q24.33 | . | .   | ID=COSM                   | . | .     | .     | .     |
| ENST0. | 10q26.13 | . | .   | rs121 ID=COSM Lik         | . | .     | .     | .     |
| ENST0. | 11p15.5  | . | .   | .                         | . | .     | .     | .     |
| ENST0. | 11p15.1  | . | .   | rs545.                    | . | 0     | .     | 2E-04 |
| ENST0. | 11p15.1  | . | Sc. | .                         | . | .     | .     | .     |
| ENST0. | 11q23.3  | . | .   | .                         | . | .     | .     | .     |
| ENST0. | 12q24.13 | . | .   | rs103.                    | . | .     | .     | .     |
| ENST0. | 13q14.2  | . | .   | .                         | . | .     | .     | .     |
| .      | 13q22.3  | . | Sc. | rs914.                    | . | .     | .     | .     |
| .      | 13q31.1  | . | .   | Score=303 rs981.          | . | .     | .     | .     |
| ENST0. | 14q11.2  | . | .   | .                         | . | .     | .     | .     |
| ENST0. | 14q13.1  | . | Sc. | .                         | . | .     | .     | .     |
| ENST0. | 14q21.2  | . | Sc. | rs563 ID=COSM             | . | 0     | .     | 2E-04 |
| ENST0. | 14q22.1  | . | .   | .                         | . | .     | .     | .     |
| ENST0. | 14q31.3  | . | .   | .                         | . | .     | .     | .     |
| ENST0. | 14q32.2  | . | .   | .                         | . | .     | .     | .     |
| ENST0. | 15q11.1  | . | Sc. | .                         | . | .     | .     | .     |
| ENST0. | 15q11.2  | . | Sc. | rs778.                    | . | .     | .     | .     |
| ENST0. | 15q15.1  | . | .   | .                         | . | .     | .     | .     |
| ENST0. | 15q15.2  | . | .   | Score=171.                | . | .     | .     | .     |
| ENST0. | 16q22.1  | . | .   | .                         | . | .     | .     | .     |
| ENST0. | 17p13.1  | . | .   | .                         | . | .     | .     | .     |
| .      | 17p11.2  | . | Sc. | rs586.                    | . | .     | .     | .     |
| ENST0. | 17q21.32 | . | .   | rs779.                    | . | .     | .     | .     |
| ENST0. | 18p11.31 | . | .   | .                         | . | .     | .     | .     |
| ENST0. | 19p13.2  | . | Sc. | rs747 ID=COSM             | . | .     | .     | .     |
| ENST0. | 19p13.12 | . | .   | .                         | . | .     | .     | .     |
| ENST0. | 19q13.11 | . | .   | Sc Score=758 rs947.       | . | .     | .     | .     |
| ENST0. | 19q13.12 | . | .   | .                         | . | .     | .     | .     |
| ENST0. | 19q13.31 | . | .   | .                         | . | .     | .     | .     |
| ENST0. | 19q13.41 | . | .   | rs371.                    | . | .     | .     | .     |
| ENST0. | 19q13.42 | . | .   | rs105.                    | . | .     | .     | .     |
| ENST0. | 20p13    | . | .   | rs558 ID=COSN1.           | . | 0     | .     | 0.002 |
| ENST0. | 20p11.1  | . | Sc. | rs603 ID=COSN2.           | . | .     | .     | .     |
| ENST0. | 20q11.22 | . | .   | .                         | . | .     | .     | .     |
| ENST0. | 20q13.12 | . | Sc. | .                         | . | .     | .     | .     |

|        |          |       |        |                              |       |       |       |       |
|--------|----------|-------|--------|------------------------------|-------|-------|-------|-------|
| ENST0. | 21p11.1  | . .   | Sc.    | rs201 ID=COSN1.              | . . . |       |       |       |
| ENST0. | 21p11.1  | . .   | Sc     | Score=183 rs200 ID=COSN1.    | . . . |       |       |       |
| ENST0. | 22q13.31 | . . . | . .    | ID=COSM.                     | . . . |       |       |       |
| ENST0. | Xq28     | . . . | . .    | . . .                        | . . . |       |       |       |
| . . .  | . . .    | . . . | . .    | . . .                        | . . . |       |       |       |
| . . .  | . . .    | . . . | . .    | . . .                        | . . . |       |       |       |
| ENST0. | 1p36.33  | . .   | Sc     | Score=237 rs626 ID=COSN2.    | . . . |       |       |       |
| ENST0. | 1p32.3   | . . . | . .    | . . .                        | . . . |       |       |       |
| ENST0. | 1q21.1   | . .   | Sc.    | rs745 ID=COSN1.              | . . . |       |       |       |
| ENST0. | 1q24.2   | . .   | Sc.    | . . .                        | . . . |       |       |       |
| ENST0. | 1q42.3   | . . . | . .    | . . .                        | . . . |       |       |       |
| . . .  | 2p11.2   | . .   | Sc.    | ID=COSN2.                    | . . . |       |       |       |
| . . .  | 2p11.2   | . .   | Sc.    | rs371 ID=COSN1.              | . . . |       |       |       |
| ENST0. | 2q31.3   | . .   | Sc.    | . . .                        | . . . |       |       |       |
| ENST0. | 3q29     | . .   | Sc.    | rs775 ID=COSN2.              | . . . |       |       |       |
| ENST0. | 4p16.3   | . . . | . .    | . . .                        | . . . |       |       |       |
| . . .  | 4p11     | . .   | Sc     | Score=866 rs469.             | . . . |       |       |       |
| ENST0. | 9q21.12  | . . . | . .    | Score=239. ID=COSN2.         | . . . |       |       |       |
| ENST0. | 10p11.1  | . .   | Sc.    | rs407 ID=COSN2.              | . . . |       |       |       |
| ENST0. | 12q21.2  | . . . | . .    | Score=223 rs921.             | . . . |       |       |       |
| ENST0. | 14q21.3  | . . . | . .    | rs112 ID=COSN1.              | . . . |       |       |       |
| ENST0. | 14q24.3  | . . . | . .    | Score=286.                   | . . . |       |       |       |
| ENST0. | 15q11.2  | . .   | Sc     | Score=496 rs285 ID=COSM: Be. | . . . |       |       |       |
| ENST0. | 15q11.2  | . .   | Sc.    | . . .                        | . . . |       |       |       |
| ENST0. | 18q12.1  | . . . | . .    | Score=813. ID=COSN1.         | . . . |       |       |       |
| ENST0. | 1q21.1   | . .   | Sc.    | . . .                        | . . . |       |       |       |
| ENST0. | 1q21.2   | . .   | Sc.    | rs278 ID=COSN1.              | . . . |       |       |       |
| ENST0. | 1q21.2   | . .   | Sc.    | rs278 ID=COSN1.              | . . . | 0.319 | 0.325 | 0.398 |
| . . .  | 2p11.2   | . .   | Sc.    | rs371 ID=COSN1.              | . . . |       |       |       |
| ENST0. | 5p14.3   | . . . | . .    | Score=354 rs199.             | . . . |       |       |       |
| ENST0. | 7q11.21  | . .   | Sc.    | rs201 ID=COSN2.              | . . . |       |       |       |
| . . .  | 7q11.21  | . .   | Sc.    | . . .                        | . . . |       |       |       |
| ENST0. | 7q22.1   | . .   | Sc.    | rs139 ID=COSN1.              | . . . |       |       |       |
| . . .  | 8p23.1   | . .   | Sc.    | rs207 ID=COSN2.              | . . . |       |       |       |
| ENST0. | 9q13     | . .   | Sc.    | rs113 ID=COSN2.              | . . . |       |       |       |
| ENST0. | 9q21.11  | . .   | Sc.    | rs764 ID=COSN1.              | . . . |       |       |       |
| ENST0. | 9q21.13  | . . . | . .    | . . .                        | . . . |       |       |       |
| ENST0. | 10q11.23 | . .   | Sc Sc. | rs199 ID=COSM.               | . . . |       |       |       |
| ENST0. | 11p15.5  | . .   | Sc     | Score=247 rs371 ID=COSN2.    | . . . |       |       |       |
| ENST0. | 11p11.2  | . . . | . .    | rs879.                       | . . . |       |       |       |
| ENST0. | 17p11.2  | . .   | Sc.    | rs115 ID=COSN1.              | . . . |       |       |       |
| ENST0. | 18p11.21 | . .   | Sc.    | rs201 ID=COSM.               | . . . |       |       |       |
| . . .  | 21p11.2  | . .   | Sc     | Score=348. ID=COSN1.         | . . . |       |       |       |
| . . .  | 21p11.2  | . .   | Sc     | Score=218 rs879 ID=COSN1.    | . . . |       |       |       |
| ENST0. | 21p11.1  | . . . | . .    | Score=215 rs104 ID=COSN1.    | . . . |       |       |       |
| ENST0. | Xq27.1   | . .   | Sc.    | rs144.                       | . . . | 0.107 | 0.101 | 0.042 |
| ENST0. | 1p36.33  | . .   | Sc.    | . . .                        | . . . |       |       |       |
| ENST0. | 1p36.31  | . . . | . .    | . . .                        | . . . |       |       |       |
| ENST0. | 1p36.31  | . . . | . .    | . . .                        | . . . |       |       |       |
| ENST0. | 1p36.22  | . .   | Sc.    | . . .                        | . . . |       |       |       |
| ENST0. | 1p36.21  | . .   | Sc.    | . . .                        | . . . |       |       |       |
| ENST0. | 1p36.21  | . .   | Sc.    | . . .                        | . . . |       |       |       |
| ENST0. | 1p21.2   | . .   | Sc.    | . . .                        | . . . |       |       |       |
| ENST0. | 1q21.1   | . .   | Sc.    | rs389 ID=COSN1.              | . . . |       |       |       |













|        |          |   |     |                           |   |       |       |       |
|--------|----------|---|-----|---------------------------|---|-------|-------|-------|
| ENST0. | Xq26.3   | . | Sc. | rs781.                    | . | 0.254 | 0.249 | 0.268 |
| ENST0. | 1p36.33  | . | Sc. | .                         | . | .     | .     | .     |
| ENST0. | 1p36.13  | . | Sc. | rs453 ID=COSN1.           | . | 0.45  | 0.437 | 0.444 |
| ENST0. | 1p34.1   | . | .   | .                         | . | .     | .     | .     |
| ENST0. | 1q21.1   | . | Sc. | rs181.                    | . | .     | .     | .     |
| ENST0. | 1q21.1   | . | Sc  | Score=208.                | . | .     | .     | .     |
| ENST0. | 1q21.1   | . | Sc. | rs879.                    | . | .     | .     | .     |
| ENST0. | 1q21.2   | . | Sc. | rs145 ID=COSN1.           | . | .     | .     | .     |
| ENST0. | 1q21.2   | . | Sc. | rs200 ID=COSN2.           | . | .     | .     | .     |
| ENST0. | 1q21.2   | . | Sc. | rs797.                    | . | .     | .     | .     |
| ENST0. | 1q32.1   | . | .   | .                         | . | .     | .     | .     |
| ENST0. | 2q37.3   | . | .   | rs199 ID=COSN2.           | . | .     | .     | .     |
| ENST0. | 3p21.31  | . | .   | Score=841.                | . | .     | .     | .     |
| ENST0. | 3q26.2   | . | .   | rs187.                    | . | 0.063 | 0.055 | 0.011 |
| .      | 3q29     | . | Sc  | Score=578 rs372.          | . | .     | .     | .     |
| ENST0. | 3q29     | . | .   | Score=235.                | . | .     | .     | .     |
| ENST0. | 3q29     | . | Sc. | rs200.                    | . | .     | .     | .     |
| .      | 4p16.1   | . | Sc. | .                         | . | .     | .     | .     |
| ENST0. | 5q31.1   | . | .   | .                         | . | .     | .     | .     |
| .      | 6q25.3   | . | .   | Score=865.                | . | .     | .     | .     |
| ENST0. | 6q26     | . | Sc. | rs774 ID=COSN1.           | . | 0.359 | 0.355 | 0.336 |
| .      | 6q27     | . | Sc. | rs375.                    | . | .     | .     | .     |
| .      | 7q11.21  | . | Sc. | ID=COSN1.                 | . | .     | .     | .     |
| .      | 7q11.21  | . | Sc. | .                         | . | .     | .     | .     |
| ENST0. | 7q11.22  | . | Sc. | Score=211.                | . | .     | .     | .     |
| ENST0. | 9p11.2   | . | Sc  | Score=121 rs280 ID=COSN1. | . | .     | .     | .     |
| .      | 10q11.22 | . | Sc. | rs199.                    | . | .     | .     | .     |
| .      | 10q11.22 | . | Sc  | Score=348 rs145 ID=COSN1. | . | .     | .     | .     |
| ENST0. | 11p15.4  | . | .   | Score=364.                | . | .     | .     | .     |
| ENST0. | 11q12.1  | . | Sc. | .                         | . | .     | .     | .     |
| ENST0. | 12p13.33 | . | Sc. | rs371 ID=COSN1.           | . | .     | .     | .     |
| ENST0. | 12p13.33 | . | Sc. | rs376 ID=COSN1.           | . | .     | .     | .     |
| ENST0. | 12q14.2  | . | .   | rs560 ID=COSN2.           | . | .     | .     | .     |
| ENST0. | 14q11.2  | . | Sc  | Score=143 rs775 ID=COSN1. | . | .     | .     | .     |
| ENST0. | 14q11.2  | . | Sc. | rs101 ID=COSN1.           | . | .     | .     | .     |
| ENST0. | 15q11.2  | . | Sc. | .                         | . | .     | .     | .     |
| ENST0. | 15q14    | . | .   | rs756.                    | . | .     | .     | .     |
| ENST0. | 16p12.2  | . | Sc  | Score=247 rs373.          | . | .     | .     | .     |
| ENST0. | 16q12.2  | . | Sc. | rs713.                    | . | 0.251 | 0.262 | 0.49  |
| ENST0. | 17p11.2  | . | Sc. | rs712.                    | . | .     | .     | .     |
| ENST0. | 17p11.2  | . | Sc. | rs614 ID=COSN2.           | . | .     | .     | .     |
| ENST0. | 17q23.1  | . | Sc. | rs287 ID=COSN2.           | . | .     | .     | .     |
| ENST0. | 17q23.1  | . | Sc. | rs284 ID=COSN2.           | . | .     | .     | .     |
| ENST0. | 17q25.3  | . | .   | .                         | . | .     | .     | .     |
| ENST0. | 18q22.1  | . | .   | .                         | . | .     | .     | .     |
| ENST0. | 19p13.2  | . | .   | Score=871.                | . | .     | .     | .     |
| ENST0. | 21p11.2  | . | Sc. | .                         | . | .     | .     | .     |
| ENST0. | 22q11.21 | . | Sc. | ID=COSN2.                 | . | .     | .     | .     |
| ENST0. | 22q13.2  | . | Sc. | rs360.                    | . | 0.266 | 0.302 | 0.458 |
| ENST0. | Xp11.21  | . | .   | .                         | . | .     | .     | .     |
| ENST0. | 1p36.33  | . | .   | rs755.                    | . | .     | .     | .     |
| ENST0. | 1p36.33  | . | Sc. | .                         | . | .     | .     | .     |
| ENST0. | 1p34.3   | . | .   | .                         | . | .     | .     | .     |
| ENST0. | 1p34.3   | . | .   | .                         | . | .     | .     | .     |

|        |         |   |     |     |                  |           |   |       |             |
|--------|---------|---|-----|-----|------------------|-----------|---|-------|-------------|
| ENST0. | 1p34.3  | . | .   | .   | .                | .         | . | .     | .           |
| ENST0. | 1p34.2  | . | Sc. | .   | .                | .         | . | .     | .           |
| ENST0. | 1p34.2  | . | Sc. | .   | .                | .         | . | .     | .           |
| ENST0. | 1p22.3  | . | .   | .   | .                | .         | . | .     | .           |
| ENST0. | 1p22.2  | . | Sc  | Sc. | .                | .         | . | .     | .           |
| ENST0. | 1p13.2  | . | Sc. | .   | rs143.           | .         | . | 0.002 | 0.001 0.015 |
| ENST0. | 1p12    | . | .   | Sc  | Score=239.       | .         | . | .     | .           |
| ENST0. | 1q21.1  | . | .   | Sc. | rs199 ID=COSN1.  | .         | . | .     | .           |
| ENST0. | 1q21.1  | . | .   | Sc  | Score=269.       | ID=COSN1. | . | .     | .           |
| ENST0. | 1q21.1  | . | .   | Sc. | rs375.           | .         | . | .     | .           |
| ENST0. | 1q21.2  | . | .   | Sc. | rs284.           | .         | . | .     | .           |
| ENST0. | 1q21.2  | . | .   | Sc. | rs782.           | .         | . | .     | .           |
| ENST0. | 1q21.2  | . | .   | Sc. | rs376 ID=COSN1.  | .         | . | .     | .           |
| ENST0. | 1q21.3  | . | .   | .   | rs909 ID=COSMf.  | .         | . | .     | .           |
| ENST0. | 1q21.3  | . | .   | .   | .                | .         | . | .     | .           |
| ENST0. | 1q25.2  | . | .   | .   | .                | .         | . | .     | .           |
| ENST0. | 1q32.1  | . | .   | .   | .                | .         | . | .     | .           |
| ENST0. | 1q32.2  | . | .   | .   | .                | .         | . | .     | .           |
| ENST0. | 2q31.2  | . | .   | .   | .                | .         | . | .     | .           |
| ENST0. | 2q35    | . | .   | .   | .                | .         | . | .     | .           |
| ENST0. | 3p26.1  | . | .   | .   | rs779 ID=COSMf.  | .         | . | .     | .           |
| ENST0. | 3p25.3  | . | .   | .   | .                | .         | . | .     | .           |
| ENST0. | 3p25.1  | . | .   | .   | .                | .         | . | .     | .           |
| ENST0. | 3p21.1  | . | Sc. | .   | .                | .         | . | .     | .           |
| ENST0. | 4p16.3  | . | .   | .   | rs778.           | .         | . | .     | .           |
| ENST0. | 4q22.1  | . | .   | .   | rs774.           | .         | . | .     | .           |
| ENST0. | 5p15.2  | . | .   | Sc. | rs238 ID=COSMf.  | .         | . | .     | .           |
| ENST0. | 5q14.1  | . | .   | .   | rs781.           | .         | . | .     | .           |
| ENST0. | 5q23.1  | . | .   | .   | .                | .         | . | .     | .           |
| ENST0. | 5q23.2  | . | .   | .   | rs114 ID=COSMf.  | .         | . | 0.    | 0.001       |
| ENST0. | 5q33.1  | . | .   | .   | .                | .         | . | .     | .           |
| ENST0. | 5q34    | . | Sc. | .   | .                | .         | . | .     | .           |
| ENST0. | 6p25.2  | . | .   | .   | .                | .         | . | .     | .           |
| ENST0. | 6p21.33 | . | .   | .   | .                | .         | . | .     | .           |
| ENST0. | 6p12.3  | . | .   | .   | .                | .         | . | .     | .           |
| ENST0. | 6q22.33 | . | .   | Sc. | rs990.           | .         | . | .     | .           |
| ENST0. | 6q25.3  | . | .   | .   | ID=COSMf.        | .         | . | .     | .           |
| ENST0. | 6q27    | . | .   | .   | .                | .         | . | .     | .           |
| ENST0. | 6q27    | . | .   | .   | .                | .         | . | .     | .           |
| ENST0. | 7p22.3  | . | Sc. | .   | .                | .         | . | .     | .           |
| ENST0. | 7p22.1  | . | .   | Sc. | .                | .         | . | .     | .           |
| ENST0. | 7p21.2  | . | .   | .   | rs746.           | .         | . | .     | .           |
| ENST0. | 7p13    | . | .   | .   | .                | .         | . | .     | .           |
| .      | 7p12.3  | . | .   | .   | Score=193.       | .         | . | .     | .           |
| ENST0. | 7q35    | . | .   | .   | rs570.           | .         | . | 0.    | 2E-04       |
| ENST0. | 7q36.1  | . | Sc. | .   | rs148 ID=COSMf.  | .         | . | .     | .           |
| ENST0. | 8p23.3  | . | .   | .   | rs758.           | .         | . | .     | .           |
| ENST0. | 8p23.1  | . | .   | .   | rs747.           | .         | . | .     | .           |
| .      | 8p11.1  | . | .   | .   | Score=126.       | .         | . | .     | .           |
| ENST0. | 8q23.3  | . | .   | .   | Score=113 rs532. | .         | . | .     | .           |
| ENST0. | 8q24.3  | . | .   | .   | rs569.           | .         | . | 0.    | 2E-04       |
| ENST0. | 9q21.2  | . | .   | .   | rs368.           | .         | . | 0.    | 2E-04       |
| ENST0. | 9q31.1  | . | .   | .   | rs374.           | .         | . | 0.003 | 0.003 6E-04 |
| ENST0. | 9q34.11 | . | .   | .   | rs752.           | .         | . | .     | .           |



|        |          |   |    |            |           |           |     |       |       |       |
|--------|----------|---|----|------------|-----------|-----------|-----|-------|-------|-------|
| .      | 1q21.1   | . | Sc | Score=224  | rs745     | ID=COSN1. | .   | .     | .     | .     |
| .      | 1q21.1   | . | Sc | .          | rs201.    | .         | .   | .     | .     | .     |
| .      | 1q21.1   | . | Sc | .          | .         | .         | .   | .     | .     | .     |
| ENST0. | 1q21.1   | . | Sc | .          | rs866     | ID=COSN1. | .   | .     | .     | .     |
| ENST0. | 1q21.1   | . | Sc | .          | rs414     | ID=COSN1. | .   | .     | .     | .     |
| ENST0. | 1q21.2   | . | Sc | .          | rs618     | ID=COSN2. | .   | .     | .     | .     |
| ENST0. | 1q23.1   | . | .  | .          | .         | .         | .   | .     | .     | .     |
| ENST0. | 1q32.1   | . | .  | .          | rs200.    | .         | .   | 0     | 0.001 | 2E-04 |
| ENST0. | 2p15     | . | .  | .          | .         | .         | .   | .     | .     | .     |
| ENST0. | 2p13.2   | . | Sc | .          | rs183.    | Ur.       | .   | 0     | .     | 2E-04 |
| ENST0. | 2p13.2   | . | .  | .          | rs200     | ID=COSM1  | Ur. | .     | .     | .     |
| ENST0. | 2p13.1   | . | .  | .          | .         | .         | .   | .     | .     | .     |
| ENST0. | 2q11.2   | . | Sc | .          | rs952     | ID=COSN1. | .   | .     | .     | .     |
| ENST0. | 2q23.1   | . | Sc | .          | .         | .         | .   | .     | .     | .     |
| ENST0. | 2q37.3   | . | .  | .          | rs373.    | .         | .   | .     | .     | .     |
| ENST0. | 3p24.1   | . | .  | .          | rs568.    | .         | .   | .     | .     | .     |
| ENST0. | 3p21.31  | . | .  | .          | rs147.    | .         | .   | 0     | .     | 2E-04 |
| ENST0. | 3p21.2   | . | Sc | .          | rs200.    | .         | .   | .     | .     | .     |
| ENST0. | 3q13.33  | . | .  | .          | .         | .         | .   | .     | .     | .     |
| ENST0. | 4p16.3   | . | .  | .          | .         | .         | .   | .     | .     | .     |
| ENST0. | 4p16.1   | . | .  | .          | .         | .         | .   | .     | .     | .     |
| ENST0. | 4p16.1   | . | Sc | .          | .         | .         | .   | .     | .     | .     |
| ENST0. | 4p13     | . | Sc | .          | .         | .         | .   | .     | .     | .     |
| .      | 4p11     | . | Sc | .          | rs293     | ID=COSN1. | .   | .     | .     | .     |
| ENST0. | 4p11     | . | Sc | .          | ID=COSN1. | .         | .   | .     | .     | .     |
| ENST0. | 4q12     | . | .  | .          | .         | .         | .   | .     | .     | .     |
| ENST0. | 4q21.21  | . | .  | .          | rs766     | ID=COSM1. | .   | .     | .     | .     |
| ENST0. | 5q12.1   | . | .  | .          | .         | .         | .   | .     | .     | .     |
| .      | 5q12.1   | . | Sc | .          | .         | .         | .   | .     | .     | .     |
| ENST0. | 5q21.1   | . | Sc | .          | .         | .         | .   | .     | .     | .     |
| ENST0. | 5q31.3   | . | Sc | .          | ID=COSN2. | .         | .   | .     | .     | .     |
| ENST0. | 5q32     | . | .  | .          | rs531.    | .         | .   | 0     | .     | 2E-04 |
| ENST0. | 6p24.2   | . | .  | Score=21;l | rs566.    | .         | .   | 0     | .     | 2E-04 |
| ENST0. | 6p22.1   | . | Sc | .          | .         | .         | .   | .     | .     | .     |
| ENST0. | 6p21.33  | . | Sc | .          | .         | .         | .   | .     | .     | .     |
| ENST0. | 7p22.3   | . | .  | .          | rs181.    | .         | .   | 0     | .     | 4E-04 |
| .      | 7p11.2   | . | Sc | .          | rs782.    | .         | .   | .     | .     | .     |
| ENST0. | 7q21.12  | . | .  | .          | rs148.    | .         | .   | 0.003 | 0.002 | 4E-04 |
| ENST0. | 7q22.1   | . | .  | .          | rs552.    | .         | .   | 0.005 | 0.004 | 0.003 |
| ENST0. | 7q33     | . | Sc | .          | ID=COSM1. | .         | .   | .     | .     | .     |
| ENST0. | 7q33     | . | .  | .          | rs373.    | .         | .   | .     | .     | .     |
| ENST0. | 7q35     | . | Sc | .          | .         | .         | .   | .     | .     | .     |
| ENST0. | 8q11.21  | . | Sc | .          | rs998.    | .         | .   | .     | .     | .     |
| ENST0. | 8q21.3   | . | .  | .          | .         | .         | .   | .     | .     | .     |
| ENST0. | 9p24.2   | . | .  | .          | .         | .         | .   | .     | .     | .     |
| ENST0. | 9p21.1   | . | .  | .          | .         | .         | .   | .     | .     | .     |
| ENST0. | 9q13     | . | Sc | .          | rs933     | ID=COSN2. | .   | .     | .     | .     |
| ENST0. | 9q22.31  | . | .  | .          | .         | .         | .   | .     | .     | .     |
| .      | 9q32     | . | Sc | .          | .         | .         | .   | .     | .     | .     |
| ENST0. | 9q34.3   | . | Sc | .          | rs945.    | .         | .   | .     | .     | .     |
| ENST0. | 9q34.3   | . | .  | .          | rs949.    | .         | .   | .     | .     | .     |
| ENST0. | 10p12.1  | . | Sc | .          | .         | .         | .   | .     | .     | .     |
| ENST0. | 10p11.1  | . | Sc | .          | .         | .         | .   | .     | .     | .     |
| .      | 10q11.22 | . | Sc | .          | rs299.    | .         | .   | .     | .     | .     |

|           |          |           |               |                    |           |           |           |           |
|-----------|----------|-----------|---------------|--------------------|-----------|-----------|-----------|-----------|
| ENST0 .   | 10q11.23 | . .       | Sc.           | . . . . .          | . . . . . | . . . . . | . . . . . | . . . . . |
| ENST0 .   | 10q24.1  | . . . . . | . . . . .     | . . . . .          | . . . . . | . . . . . | . . . . . | . . . . . |
| ENST0 .   | 10q24.2  | . . . . . | . . . . .     | rs779.             | . . . . . | . . . . . | . . . . . | . . . . . |
| ENST0 .   | 11p15.3  | . . . . . | . . . . .     | . . . . .          | . . . . . | . . . . . | . . . . . | . . . . . |
| ENST0 .   | 11q22.3  | . . . . . | . . . . .     | . . . . .          | . . . . . | . . . . . | . . . . . | . . . . . |
| ENST0 .   | 11q23.3  | . . . . . | Sc.           | . . . . .          | . . . . . | . . . . . | . . . . . | . . . . . |
| ENST0 .   | 11q25    | . . . . . | . . . . .     | . . . . .          | . . . . . | . . . . . | . . . . . | . . . . . |
| ENST0 .   | 12p13.31 | . . . . . | . . . . .     | . . . . .          | . . . . . | . . . . . | . . . . . | . . . . . |
| ENST0 .   | 12p13.2  | . . . . . | . . . . .     | ID=COSMf.          | . . . . . | . . . . . | . . . . . | . . . . . |
| ENST0 .   | 12p12.1  | . . . . . | Sc.           | rs121 ID=COSMf Pa. | . . . . . | . . . . . | . . . . . | . . . . . |
| ENST0 .   | 12q13.3  | . . . . . | . . . . .     | rs352.             | Be.       | 0 .       | 8E-04     |           |
| ENST0 .   | 12q21.1  | . . . . . | . . . . .     | . . . . .          | . . . . . | . . . . . | . . . . . | . . . . . |
| ENST0 .   | 12q23.3  | . . . . . | . . . . .     | rs539.             | . . . . . | 0 .       | 2E-04     |           |
| . . . . . | 13q31.1  | . . . . . | Sc.           | . . . . .          | . . . . . | . . . . . | . . . . . | . . . . . |
| ENST0 .   | 14q22.2  | . . . . . | Score=27;l.   | . . . . .          | . . . . . | . . . . . | . . . . . | . . . . . |
| ENST0 .   | 14q32.2  | . . . . . | . . . . .     | rs879.             | . . . . . | . . . . . | . . . . . | . . . . . |
| ENST0 .   | 15q11.2  | . . . . . | Sc.           | . . . . .          | . . . . . | . . . . . | . . . . . | . . . . . |
| ENST0 .   | 15q11.2  | . . . . . | Sc Sc.        | . . . . .          | . . . . . | . . . . . | . . . . . | . . . . . |
| ENST0 .   | 15q12    | . . . . . | . . . . .     | ID=COSMz.          | . . . . . | . . . . . | . . . . . | . . . . . |
| ENST0 .   | 15q13.3  | . . . . . | Sc.           | rs783.             | . . . . . | 0.095     | 0.082     | 0.146     |
| . . . . . | 15q25.2  | . . . . . | Sc.           | rs201 ID=COSN1.    | . . . . . | . . . . . | . . . . . | . . . . . |
| ENST0 .   | 16p12.1  | . . . . . | . . . . .     | . . . . .          | . . . . . | . . . . . | . . . . . | . . . . . |
| ENST0 .   | 16p11.2  | . . . . . | Sc.           | . . . . .          | . . . . . | . . . . . | . . . . . | . . . . . |
| ENST0 .   | 16q12.1  | . . . . . | . . . . .     | . . . . .          | . . . . . | . . . . . | . . . . . | . . . . . |
| ENST0 .   | 16q22.1  | . . . . . | Sc.           | rs200 ID=COSNz.    | . . . . . | . . . . . | . . . . . | . . . . . |
| ENST0 .   | 16q23.3  | . . . . . | . . . . .     | . . . . .          | . . . . . | . . . . . | . . . . . | . . . . . |
| ENST0 .   | 17q12    | . . . . . | . . . . .     | . . . . .          | . . . . . | . . . . . | . . . . . | . . . . . |
| ENST0 .   | 17q12    | . . . . . | Sc.           | . . . . .          | . . . . . | . . . . . | . . . . . | . . . . . |
| ENST0 .   | 17q12    | . . . . . | . . . . .     | . . . . .          | . . . . . | . . . . . | . . . . . | . . . . . |
| ENST0 .   | 17q25.3  | . . . . . | . . . . .     | . . . . .          | . . . . . | . . . . . | . . . . . | . . . . . |
| ENST0 .   | 18q21.33 | . . . . . | Sc Score=214. | . . . . .          | . . . . . | . . . . . | . . . . . | . . . . . |
| ENST0 .   | 19p13.3  | . . . . . | Score=235     | rs867 ID=COSNz.    | . . . . . | . . . . . | . . . . . | . . . . . |
| ENST0 .   | 19p13.2  | . . . . . | . . . . .     | . . . . .          | . . . . . | . . . . . | . . . . . | . . . . . |
| ENST0 .   | 19p13.2  | . . . . . | Sc.           | rs768.             | . . . . . | . . . . . | . . . . . | . . . . . |
| ENST0 .   | 19q13.12 | . . . . . | . . . . .     | . . . . .          | . . . . . | . . . . . | . . . . . | . . . . . |
| ENST0 .   | 19q13.2  | . . . . . | Sc.           | . . . . .          | . . . . . | . . . . . | . . . . . | . . . . . |
| ENST0 .   | 19q13.31 | . . . . . | . . . . .     | . . . . .          | . . . . . | . . . . . | . . . . . | . . . . . |
| ENST0 .   | 19q13.42 | . . . . . | . . . . .     | . . . . .          | . . . . . | . . . . . | . . . . . | . . . . . |
| ENST0 .   | 19q13.42 | . . . . . | Score=213.    | . . . . .          | . . . . . | . . . . . | . . . . . | . . . . . |
| ENST0 .   | 19q13.43 | . . . . . | Sc.           | rs770.             | . . . . . | . . . . . | . . . . . | . . . . . |
| ENST0 .   | 20p13    | . . . . . | Sc.           | . . . . .          | . . . . . | . . . . . | . . . . . | . . . . . |
| ENST0 .   | 20p11.21 | . . . . . | . . . . .     | rs200.             | . . . . . | 0 .       | 2E-04     |           |
| ENST0 .   | 20q11.23 | . . . . . | . . . . .     | . . . . .          | . . . . . | . . . . . | . . . . . | . . . . . |
| . . . . . | 20q13.2  | . . . . . | Score=126.    | . . . . .          | . . . . . | . . . . . | . . . . . | . . . . . |
| ENST0 .   | 21q21.1  | . . . . . | Sc.           | . . . . .          | . . . . . | . . . . . | . . . . . | . . . . . |
| ENST0 .   | 22q12.3  | . . . . . | . . . . .     | . . . . .          | . . . . . | . . . . . | . . . . . | . . . . . |
| ENST0 .   | Xp11.23  | . . . . . | Sc.           | . . . . .          | . . . . . | . . . . . | . . . . . | . . . . . |
| ENST0 .   | Xq22.1   | . . . . . | . . . . .     | . . . . .          | . . . . . | . . . . . | . . . . . | . . . . . |
| ENST0 .   | Xq22.3   | . . . . . | . . . . .     | ID=COSMf.          | . . . . . | . . . . . | . . . . . | . . . . . |
| ENST0 .   | Xq22.3   | . . . . . | . . . . .     | rs753.             | . . . . . | 0.002     | 0.001     | 3E-04     |
| ENST0 .   | Xq25     | . . . . . | . . . . .     | . . . . .          | . . . . . | . . . . . | . . . . . | . . . . . |
| ENST0 .   | Xq26.3   | . . . . . | . . . . .     | rs776.             | . . . . . | . . . . . | . . . . . | . . . . . |
| ENST0 .   | Xq27.3   | . . . . . | . . . . .     | . . . . .          | . . . . . | . . . . . | . . . . . | . . . . . |
| ENST0 .   | Xq28     | . . . . . | . . . . .     | rs398.             | Pa.       | 0.002     | 0.001     | 5E-04     |













|        |          |   |   |     |                           |   |   |       |       |       |
|--------|----------|---|---|-----|---------------------------|---|---|-------|-------|-------|
| ENST0. | 16p11.2  | . | . | .   | .                         | . | . | .     | .     | .     |
| ENST0. | 16p11.2  | . | . | Sc. | rs145 ID=COSM'            | . | . | .     | .     | .     |
| ENST0. | 16q22.1  | . | . | .   | .                         | . | . | .     | .     | .     |
| ENST0. | 16q22.1  | . | . | .   | rs113 ID=COSN2.           | . | . | .     | .     | .     |
| ENST0. | 17p13.3  | . | . | Sc. | rs767.                    | . | . | .     | .     | .     |
| ENST0. | 17p13.1  | . | . | Sc. | rs760.                    | . | . | .     | .     | .     |
| ENST0. | 17p13.1  | . | . | .   | .                         | . | . | .     | .     | .     |
| ENST0. | 17q11.2  | . | . | .   | rs554.                    | . | . | 0.    | .     | 4E-04 |
| ENST0. | 17q21.31 | . | . | .   | .                         | . | . | .     | .     | .     |
| ENST0. | 17q24.2  | . | . | .   | .                         | . | . | .     | .     | .     |
| ENST0. | 17q25.3  | . | . | .   | rs740.                    | . | . | 0.    | .     | 0.011 |
| ENST0. | 18p11.21 | . | . | Sc. | rs783 ID=COSN2.           | . | . | .     | .     | .     |
| ENST0. | 18q12.3  | . | . | .   | .                         | . | . | .     | .     | .     |
| ENST0. | 18q21.2  | . | . | .   | .                         | . | . | .     | .     | .     |
| ENST0. | 18q21.32 | . | . | Sc. | rs146.                    | . | . | 0.013 | 0.011 | 0.021 |
| ENST0. | 18q22.1  | . | . | .   | rs563.                    | . | . | 0.    | .     | 2E-04 |
| ENST0. | 19p13.3  | . | . | .   | .                         | . | . | .     | .     | .     |
| ENST0. | 19p13.2  | . | . | .   | .                         | . | . | .     | .     | .     |
| ENST0. | 19p13.2  | . | . | .   | Score=980.                | . | . | .     | .     | .     |
| ENST0. | 19p13.12 | . | . | .   | .                         | . | . | .     | .     | .     |
| .      | 19p13.11 | . | . | .   | .                         | . | . | .     | .     | .     |
| ENST0. | 19p12    | . | . | .   | .                         | . | . | .     | .     | .     |
| ENST0. | 19p12    | . | . | Sc. | .                         | . | . | .     | .     | .     |
| ENST0. | 19q13.12 | . | . | .   | Score=321.                | . | . | .     | .     | .     |
| .      | 19q13.12 | . | . | .   | Sc Score=123 rs712.       | . | . | .     | .     | .     |
| ENST0. | 19q13.41 | . | . | .   | rs182.                    | . | . | 0.    | .     | 0.002 |
| ENST0. | 20p13    | . | . | .   | .                         | . | . | .     | .     | .     |
| ENST0. | 20p13    | . | . | Sc. | .                         | . | . | .     | .     | .     |
| ENST0. | 20p12.3  | . | . | .   | .                         | . | . | .     | .     | .     |
| ENST0. | 20q13.33 | . | . | .   | .                         | . | . | .     | .     | .     |
| .      | 21p11.2  | . | . | Sc. | rs796.                    | . | . | .     | .     | .     |
| ENST0. | 21p11.1  | . | . | Sc. | rs373 ID=COSN1.           | . | . | 0.061 | 0.062 | 0.071 |
| ENST0. | 21p11.1  | . | . | Sc  | Score=471 rs728 ID=COSN1. | . | . | .     | .     | .     |
| ENST0. | 21q21.1  | . | . | .   | Score=149.                | . | . | .     | .     | .     |
| ENST0. | 21q22.12 | . | . | .   | rs773.                    | . | . | .     | .     | .     |
| ENST0. | 21q22.3  | . | . | Sc. | rs551.                    | . | . | 0.    | .     | 2E-04 |
| ENST0. | 21q22.3  | . | . | Sc. | .                         | . | . | .     | .     | .     |
| ENST0. | 21q22.3  | . | . | Sc. | .                         | . | . | .     | .     | .     |
| ENST0. | 22q11.1  | . | . | Sc. | rs126.                    | . | . | .     | .     | .     |
| ENST0. | 22q11.22 | . | . | Sc. | rs860 ID=COSN1.           | . | . | .     | .     | .     |
| ENST0. | 22q12.2  | . | . | .   | .                         | . | . | .     | .     | .     |
| ENST0. | Xp22.2   | . | . | .   | .                         | . | . | .     | .     | .     |
| ENST0. | Xp22.13  | . | . | .   | rs778.                    | . | . | .     | .     | .     |
| ENST0. | Xp11.22  | . | . | .   | .                         | . | . | .     | .     | .     |
| .      | Xq12     | . | . | .   | .                         | . | . | .     | .     | .     |
| ENST0. | Xq13.1   | . | . | .   | Score=939.                | . | . | .     | .     | .     |
| ENST0. | Xq13.1   | . | . | Sc. | ID=COSM'                  | . | . | .     | .     | .     |
| ENST0. | Xq22.1   | . | . | Sc. | .                         | . | . | .     | .     | .     |
| ENST0. | Xq22.1   | . | . | Sc. | .                         | . | . | .     | .     | .     |
| ENST0. | Xq25     | . | . | .   | rs917.                    | . | . | .     | .     | .     |
| .      | Xq28     | . | . | .   | Score=415 rs927.          | . | . | .     | .     | .     |
| ENST0. | Xq28     | . | . | .   | .                         | . | . | .     | .     | .     |
| ENST0. | 1p36.13  | . | . | .   | rs371 ID=COSM'            | . | . | .     | .     | .     |
| ENST0. | 1p36.11  | . | . | Sc. | .                         | . | . | .     | .     | .     |



|        |          |   |     |            |                 |       |       |       |   |
|--------|----------|---|-----|------------|-----------------|-------|-------|-------|---|
| ENST0. | 10q25.2  | . | .   | .          | rs764 ID=COSMk. | .     | .     | .     | . |
| ENST0. | 10q25.3  | . | .   | .          | .               | .     | .     | .     | . |
| ENST0. | 11p15.4  | . | .   | .          | .               | .     | .     | .     | . |
| ENST0. | 11p11.12 | . | Sc. | .          | .               | .     | .     | .     | . |
| ENST0. | 11q13.5  | . | .   | .          | rs377.          | .     | .     | .     | . |
| ENST0. | 11q14.3  | . | Sc. | .          | .               | .     | .     | .     | . |
| .      | 11q22.3  | . | .   | Score=234  | rs769.          | .     | .     | .     | . |
| ENST0. | 11q23.3  | . | Sc. | .          | rs758 ID=COSMk. | .     | .     | .     | . |
| ENST0. | 12p11.23 | . | .   | .          | .               | .     | .     | .     | . |
| ENST0. | 12q13.12 | . | .   | .          | .               | .     | .     | .     | . |
| ENST0. | 12q13.2  | . | .   | .          | .               | .     | .     | .     | . |
| ENST0. | 13q12.2  | . | .   | .          | .               | .     | .     | .     | . |
| .      | 14q11.2  | . | Sc. | .          | rs225 ID=COSN1. | .     | .     | .     | . |
| .      | 14q11.2  | . | Sc. | .          | rs201.          | .     | .     | .     | . |
| ENST0. | 14q24.1  | . | Sc. | .          | .               | .     | .     | .     | . |
| ENST0. | 15q21.3  | . | .   | .          | .               | .     | .     | .     | . |
| ENST0. | 16p13.3  | . | .   | .          | rs776.          | .     | .     | .     | . |
| ENST0. | 16p12.2  | . | .   | .          | .               | .     | .     | .     | . |
| ENST0. | 16q23.1  | . | Sc. | .          | rs201 ID=COSN1. | 0.324 | 0.285 | 0.318 |   |
| .      | 18p11.21 | . | Sc. | .          | rs750 ID=COSN1. | 0.623 | 0.62  | 0.291 |   |
| ENST0. | 19p13.2  | . | .   | .          | rs758 ID=COSMk. | .     | .     | .     | . |
| ENST0. | 19p13.2  | . | .   | .          | .               | .     | .     | .     | . |
| ENST0. | 19q13.2  | . | .   | Score=433. | .               | .     | .     | .     | . |
| ENST0. | 19q13.32 | . | .   | .          | .               | .     | .     | .     | . |
| ENST0. | 19q13.32 | . | .   | .          | .               | .     | .     | .     | . |
| ENST0. | 19q13.42 | . | Sc. | .          | rs901.          | .     | .     | .     | . |
| ENST0. | 20p12.2  | . | .   | .          | .               | .     | .     | .     | . |
| ENST0. | 20p12.2  | . | .   | .          | rs777.          | .     | .     | .     | . |
| ENST0. | 20q11.23 | . | .   | .          | rs779.          | .     | .     | .     | . |
| ENST0. | 21q22.11 | . | .   | .          | .               | .     | .     | .     | . |
| ENST0. | 22q12.2  | . | Sc. | .          | .               | .     | .     | .     | . |
| ENST0. | Xp22.12  | . | .   | Score=234. | .               | .     | .     | .     | . |
| ENST0. | Xp21.3   | . | Sc. | .          | .               | .     | .     | .     | . |
| ENST0. | Xp11.23  | . | Sc. | .          | .               | .     | .     | .     | . |
| ENST0. | Xp11.22  | . | .   | .          | .               | .     | .     | .     | . |
| ENST0. | Xq22.1   | . | .   | .          | .               | .     | .     | .     | . |
| ENST0. | Xq22.3   | . | .   | .          | .               | .     | .     | .     | . |
| ENST0. | Xq26.3   | . | .   | .          | .               | .     | .     | .     | . |
| ENST0. | Xq26.3   | . | .   | .          | ID=COSMk.       | .     | .     | .     | . |
| ENST0. | Xq28     | . | .   | .          | .               | .     | .     | .     | . |
| ENST0. | Xq28     | . | Sc. | .          | rs401.          | .     | .     | .     | . |
| .      | .        | . | .   | .          | ID=COSMk.       | .     | .     | .     | . |



| esp650 | Ex/ | Ex/ | SIF | Pol | Polyp | Mutat | gerp | CAD  | Novi | Novi | INFC                | FOR | ACa | ACa | Ori_REF | Ori_ALT | shared_ho |
|--------|-----|-----|-----|-----|-------|-------|------|------|------|------|---------------------|-----|-----|-----|---------|---------|-----------|
| .      | .   | .   | .   | .   | .     | .     | .    | .    | 0    | 0.2  | SOMGT:0:8,(0/1):T   |     |     |     | C       |         | 0         |
| .      | .   | .   | .   | .   | .     | .     | .    | .    | .    | .    | SOMGT:0:11 0/1:G    |     |     |     | A       |         | 0         |
| .      | .   | .   | .   | .   | .     | .     | .    | .    | .    | .    | SOMGT:0:50 0/1:C    |     |     |     | C       |         | 0         |
| .      | .   | .   | .   | .   | .     | .     | .    | .    | .    | .    | SOMGT:0:13 0/1:C    |     |     |     | C       |         | 0         |
| .      | ##  | 0   | 0.9 | 0.0 | 0.001 | 1.000 | .    | .    | .    | .    | SOMGT:0:71 0/1:G    |     |     |     | A       |         | 0         |
| .      | .   | .   | .   | .   | .     | .     | .    | .    | .    | .    | SOMGT:0:21 0/1:C    |     |     |     | C       |         | 0         |
| .      | .   | .   | .   | .   | .     | .     | .    | .    | 0    | .    | SOMGT:0:8,(0/1):A   |     |     |     | G       |         | 0         |
| .      | .   | .   | .   | .   | .     | .     | .    | .    | 0    | .    | SOMGT:0:14 0/1:G    |     |     |     | T       |         | 0         |
| .      | .   | .   | .   | .   | .     | .     | .    | .    | 0    | 0    | SOMGT:0:30 0/1:C    |     |     |     | G       |         | 0         |
| .      | .   | .   | .   | .   | .     | .     | .    | .    | 0    | 0    | SOMGT:0:17 0/1:T    |     |     |     | C       |         | 0         |
| .      | .   | .   | .   | .   | .     | .     | .    | .    | 0    | .    | SOMGT:0:25 0/1:G    |     |     |     | A       |         | 0         |
| .      | .   | .   | .   | .   | .     | .     | .    | .    | .    | .    | SOMGT:0:11 0/1:A    |     |     |     | C       |         | 0         |
| 2E-04  | ##  | 0   | .   | .   | .     | .     | 3.3  | 4.54 | .    | .    | SOMGT:0:19 0/1:G    |     |     |     | A       |         | 0         |
| .      | .   | .   | .   | .   | .     | .     | .    | .    | .    | .    | SOMGT:0:49 0/1:G    |     |     |     | A       |         | 0         |
| .      | .   | .   | .   | .   | .     | .     | .    | .    | .    | .    | SOMGT:0:14 0/1:A    |     |     |     | C       |         | 0         |
| .      | .   | .   | .   | .   | .     | .     | .    | .    | .    | .    | SOMGT:0:13 0/1:G    |     |     |     | A       |         | 0         |
| .      | .   | .   | .   | .   | .     | .     | .    | .    | .    | .    | SOMGT:0:10 0/1:A    |     |     |     | T       |         | 0         |
| .      | .   | .   | .   | .   | .     | .     | .    | .    | .    | .    | DB;SOMGT:0:23 0/1:G |     |     |     | A       |         | 0         |
| .      | .   | .   | .   | .   | .     | .     | .    | .    | 0    | 0    | SOMGT:0:18 0/1:A    |     |     |     | C       |         | 0         |
| .      | .   | .   | .   | .   | .     | .     | .    | .    | 0    | .    | SOMGT:0:9,(0/1):T   |     |     |     | C       |         | 0         |
| .      | .   | .   | .   | .   | .     | .     | .    | .    | 0    | 0.1  | SOMGT:0:17 0/1:G    |     |     |     | A       |         | 0         |
| .      | .   | .   | .   | .   | .     | .     | .    | .    | 0    | 0.3  | SOMGT:0:12 0/1:C    |     |     |     | G       |         | 0         |
| .      | .   | .   | .   | .   | .     | .     | .    | .    | 0    | .    | SOMGT:0:42 0/1:A    |     |     |     | T       |         | 0         |
| .      | .   | .   | .   | .   | .     | .     | .    | .    | 0    | 0.1  | SOMGT:0:30 0/1:C    |     |     |     | G       |         | 0         |
| .      | .   | .   | .   | .   | .     | .     | .    | .    | .    | .    | SOMGT:0:43 0/1:G    |     |     |     | A       |         | 0         |
| .      | .   | .   | .   | .   | .     | .     | .    | .    | 0    | 0    | SOMGT:0:8,(0/1):C   |     |     |     | T       |         | 0         |
| .      | .   | .   | .   | .   | .     | .     | 4.8  | 4.02 | .    | .    | SOMGT:0:11 0/1:T    |     |     |     | C       |         | 0         |
| .      | .   | .   | .   | .   | .     | .     | .    | .    | 0.1  | 0.5  | SOMGT:0:8,(0/1):T   |     |     |     | C       |         | 0         |
| .      | .   | .   | .   | .   | .     | .     | .    | .    | 0    | .    | SOMGT:0:15 0/1:A    |     |     |     | G       |         | 0         |
| .      | .   | .   | .   | .   | .     | .     | .    | .    | .    | .    | SOMGT:0:13 0/1:G    |     |     |     | T       |         | 0         |
| .      | .   | .   | .   | .   | .     | .     | .    | .    | 0    | .    | SOMGT:0:37 0/1:G    |     |     |     | A       |         | 0         |
| .      | .   | .   | .   | .   | .     | .     | .    | .    | .    | .    | SOMGT:0:36 0/1:C    |     |     |     | T       |         | 0         |
| .      | .   | .   | .   | .   | .     | .     | .    | .    | .    | .    | SOMGT:0:57 0/1:C    |     |     |     | G       |         | 0         |
| .      | .   | .   | .   | .   | .     | .     | .    | .    | 0    | 0.4  | SOMGT:0:14 0/1:G    |     |     |     | A       |         | 0         |
| .      | .   | .   | .   | .   | .     | .     | .    | .    | 0    | .    | DB;SOMGT:0:40 0/1:A |     |     |     | C       |         | 0         |
| .      | ##  | 0   | .   | .   | .     | .     | .    | .    | .    | .    | SOMGT:0:12 0/1:C    |     |     |     | T       |         | 0         |
| .      | .   | .   | .   | .   | .     | .     | .    | .    | 0.2  | 0.7  | SOMGT:0:9,(0/1):C   |     |     |     | T       |         | 0         |
| 0.004  | 0   | 0   | 0.2 | 0.0 | 0.001 | 1,N   | .    | .    | 0    | 0    | SOMGT:0:21 0/1:T    |     |     |     | G       |         | 0         |
| .      | ##  | .   | 0.1 | 0.0 | 0.003 | 1,D   | 3.5  | 3.54 | 0    | .    | SOMGT:0:15 0/1:G    |     |     |     | A       |         | 0         |
| .      | .   | .   | .   | .   | .     | .     | .    | .    | .    | .    | SOMGT:0:24 0/1:G    |     |     |     | T       |         | 0         |
| .      | .   | .   | .   | .   | .     | .     | 1.82 | 0    | .    | .    | SOMGT:0:17 0/1:A    |     |     |     | C       |         | 0         |
| .      | .   | .   | .   | .   | .     | .     | .    | .    | .    | .    | SOMGT:0:49 0/1:A    |     |     |     | C       |         | 0         |
| .      | 0   | 0   | .   | .   | .     | .     | .    | .    | 0    | 0.1  | SOMGT:0:54 0/1:A    |     |     |     | G       |         | 0         |
| .      | .   | .   | .   | .   | .     | .     | .    | .    | 0.2  | 0.1  | DB;SOMGT:0:64 0/1:A |     |     |     | G       |         | 0         |
| .      | .   | .   | .   | .   | .     | .     | .    | .    | 0.1  | 0.1  | DB;SOMGT:0:28 0/1:G |     |     |     | T       |         | 0         |
| .      | .   | .   | .   | .   | .     | .     | .    | .    | 0    | 0    | DB;SOMGT:0:24 0/1:C |     |     |     | A       |         | 0         |
| .      | .   | .   | .   | .   | .     | .     | .    | .    | 0    | .    | SOMGT:0:14 0/1:G    |     |     |     | A       |         | 0         |
| .      | .   | .   | .   | .   | .     | .     | .    | .    | .    | .    | SOMGT:0:8,(0/1):C   |     |     |     | T       |         | 0         |
| .      | .   | .   | 0.1 | 0.1 | 0.087 | 1,D   | 3.4  | 2.35 | .    | .    | SOMGT:0:10 0/1:A    |     |     |     | G       |         | 0         |
| .      | .   | .   | .   | .   | .     | .     | .    | .    | 0.1  | 0.2  | SOMGT:0:66 0/1:T    |     |     |     | G       |         | 0         |
| .      | .   | .   | .   | .   | .     | .     | .    | .    | 0    | 0    | SOMGT:0:8,(0/1):A   |     |     |     | G       |         | 0         |

|       |    |     |     |       |         |       |      |                  |                         |   |   |
|-------|----|-----|-----|-------|---------|-------|------|------------------|-------------------------|---|---|
| 1     | 1  |     |     |       |         | 0     | 0    | SOMGT:0:25 0/1:T | C                       | 0 |   |
|       |    | 0.0 | 0.9 | 0.998 | 1,N     |       |      | SOMGT:0:12 0/1:C | A                       | 0 |   |
|       |    |     |     |       |         |       |      | SOMGT:0:19 0/1:C | T                       | 0 |   |
|       |    | 0.0 | 0.2 | 0.347 | 1.000   | 5.5   | 2.28 | SOMGT:0:57 0/1:A | T                       | 0 |   |
|       |    |     |     |       |         |       |      | SOMGT:0:20 0/1:T | G                       | 0 |   |
|       |    | 0.0 | 0.0 | 0.006 | 0.812   | 4.4   | 2.83 | SOMGT:0:13 0/1:C | T                       | 0 |   |
|       |    | 0.8 | 0.0 | 0.0   | B 0.986 | 2.4   |      | SOMGT:0:38 0/1:T | G                       | 0 |   |
| ##    | 0  |     |     |       |         |       |      | SOMGT:0:54 0/1:C | T                       | 0 |   |
|       |    |     |     |       |         |       |      | SOMGT:0:44 0/1:C | T                       | 0 |   |
|       |    |     |     |       |         |       |      | SOMGT:0:32 0/1:A | C                       | 0 |   |
|       |    |     |     |       |         |       |      | SOMGT:0:29 0/1:T | G                       | 0 |   |
|       |    |     |     |       |         | 3.4   |      | SOMGT:0:22 0/1:T | G                       | 0 |   |
|       |    | 0.3 | 0.1 | 0.167 | 1.000   | 5.7   | 2.23 | SOMGT:0:22 0/1:C | G                       | 0 |   |
|       |    |     |     |       |         |       |      | SOMGT:0:10 0/1:G | A                       | 0 |   |
| 8E-04 | 0  | 0   | 0.0 | 0.9   | 1.0,D   | 1.000 | 4.9  | 5.22             | SOMGT:0:57 0/1:C        | T | 0 |
| 5E-04 | 0  | 0   | 0.0 | 0.3   | 0.932   | 1,N   |      |                  | SOMGT:0:11 0/1:C        | T | 0 |
|       |    |     |     |       |         | 1.45  |      |                  | SOMGT:0:44 0/1:G        | A | 0 |
|       | 0  |     |     |       |         |       |      | 0                | 0 DB;SOMGT:0:62 0/1:G   | T | 0 |
|       |    |     |     |       |         |       |      |                  | SOMGT:0:12 0/1:C        | G | 0 |
| ##    | 0  |     |     |       |         |       |      |                  | SOMGT:0:39 0/1:C        | T | 0 |
|       |    | 1.0 | 0.1 | 0.478 | 1.000   | 5.9   |      |                  | SOMGT:0:27 0/1:G        | A | 0 |
|       |    |     |     |       |         |       |      |                  | SOMGT:0:15 0/1:C        | T | 0 |
|       |    |     |     |       |         |       |      | 0                | 0.2 SOMGT:0:16 0/1:T    | C | 0 |
|       |    |     |     |       |         |       |      | 0                | 0 SOMGT:0:16 0/1:C      | T | 0 |
|       |    |     |     |       |         |       |      | 0.2              | 0.2 DB;SOMGT:0:24 0/1:C | T | 0 |
|       |    |     |     |       |         |       |      | 0                | SOMGT:0:22 0/1:T        | G | 0 |
|       |    |     |     |       |         |       |      | 0                | 0 SOMGT:0:9,(0/1:C      | T | 0 |
|       |    |     |     |       |         |       |      | 0                | SOMGT:0:10 0/1:G        | A | 0 |
|       |    | 0.1 |     |       | 0.941   |       |      |                  | SOMGT:0:36 0/1:C        | T | 0 |
| 2E-04 | ## | 0   |     |       |         |       |      | 0                | SOMGT:0:19 0/1:C        | T | 0 |
|       |    |     |     |       |         |       |      |                  | SOMGT:0:44 0/1:C        | T | 0 |
|       |    |     |     |       |         |       |      | 0                | 0 DB;SOMGT:0:51 0/1:T   | C | 0 |
|       |    |     |     |       |         |       |      |                  | SOMGT:0:40 0/1:G        | A | 0 |
|       |    |     |     |       |         |       |      |                  | SOMGT:0:21 0/1:C        | A | 0 |
|       |    |     |     |       |         |       |      | 0                | 0 SOMGT:0:36 0/1:A      | G | 0 |
|       |    |     |     |       |         | 2.36  |      |                  | SOMGT:0:11 0/1:T        | G | 0 |
|       |    |     |     |       |         |       |      | 0.1              | 0.2 SOMGT:0:16 0/1:T    | C | 0 |
|       |    |     |     |       |         |       |      |                  | SOMGT:0:67 0/1:C        | G | 0 |
|       |    |     |     |       |         |       |      |                  | SOMGT:0:26 0/1:A        | G | 0 |
| ##    | 0  |     |     |       |         |       |      |                  | SOMGT:0:48 0/1:C        | T | 0 |
|       |    |     |     |       |         | 1.72  |      |                  | SOMGT:0:43 0/1:C        | T | 0 |
| ##    | 0  | 0.0 | 0.9 | 1.0,D | 1,D     | 5.7   | 3.22 |                  | SOMGT:0:71 0/1:C        | T | 0 |
|       |    |     |     |       |         | 1.61  | 0.1  | 0                | SOMGT:0:9,(0/1:A        | C | 0 |
|       |    |     |     |       |         |       |      | 0                | DB;SOMGT:0:22 0/1:G     | C | 0 |
|       |    |     |     |       |         |       |      |                  | SOMGT:0:37 0/1:G        | A | 0 |
|       |    | 0.4 | 0.0 | 0.0   | B 0.999 |       |      |                  | SOMGT:0:51 0/1:T        | G | 0 |
|       |    |     |     |       |         |       |      |                  | SOMGT:0:15 0/1:T        | C | 0 |
|       |    | 0.0 | 0.9 | 0.998 | 1,D     | 5.2   | 4.56 |                  | SOMGT:0:30 0/1:A        | G | 0 |
|       |    |     |     |       |         |       |      |                  | SOMGT:0:8,(0/1:C        | T | 0 |
|       |    |     |     |       |         |       |      |                  | SOMGT:0:87 0/1:T        | A | 0 |
|       |    |     |     |       |         |       |      | 0                | 0 SOMGT:0:10 0/1:T      | C | 0 |
|       |    | 0.1 | 0.0 | 0.063 | 1,N     |       |      |                  | SOMGT:0:22 0/1:C        | T | 0 |
| ##    | 0  |     |     |       |         |       |      |                  | SOMGT:0:81 0/1:G        | A | 0 |
|       |    |     |     |       |         |       |      |                  | SOMGT:0:65 0/1:G        | A | 0 |

|       |   |     |     |       |       |       |       |      |                      |                     |                  |                  |   |   |
|-------|---|-----|-----|-------|-------|-------|-------|------|----------------------|---------------------|------------------|------------------|---|---|
| 0.033 | 0 | 0   |     |       |       |       |       |      | DB;SOMGT:0:43 0/1:C  | T                   | 0                |                  |   |   |
|       |   |     |     |       |       |       |       | 0    | 0 SOMGT:0:23 0/1:C   | T                   | 0                |                  |   |   |
|       |   |     |     |       |       |       |       |      | SOMGT:0:11 0/1:G     | T                   | 0                |                  |   |   |
|       |   |     |     |       |       |       |       |      | DB;SOMGT:0:19 0/1:G  | C                   | 0                |                  |   |   |
|       |   |     |     |       |       |       |       |      | SOMGT:0:38 0/1:G     | A                   | 0                |                  |   |   |
|       |   |     |     |       |       |       |       |      | SOMGT:0:23 0/1:C     | T                   | 0                |                  |   |   |
|       |   |     |     |       |       |       |       | 0    | 0 SOMGT:0:8,(0/1:C   | T                   | 0                |                  |   |   |
|       |   |     |     |       |       |       |       | 0    | 0 SOMGT:0:10 0/1:G   | C                   | 0                |                  |   |   |
|       |   |     |     |       |       |       |       |      | SOMGT:0:12 0/1:C     | T                   | 0                |                  |   |   |
|       |   | 0.0 | 0.3 | 0.883 | 1,N   |       |       |      | SOMGT:0:10 0/1:A     | C                   | 0                |                  |   |   |
|       |   |     |     |       |       |       |       | 0    | DB;SOMGT:0:22 0/1:G  | T                   | 0                |                  |   |   |
|       |   |     |     |       |       |       |       |      | SOMGT:0:52 0/1:G     | T                   | 0                |                  |   |   |
|       |   |     |     |       |       |       |       |      | SOMGT:0:90 0/1:G     | A                   | 0                |                  |   |   |
|       |   |     |     |       |       |       |       | 0    | SOMGT:0:28 0/1:G     | A                   | 0                |                  |   |   |
|       |   |     |     |       |       |       |       | 0    | SOMGT:0:30 0/1:C     | G                   | 0                |                  |   |   |
|       |   |     |     |       |       |       |       | 0    | SOMGT:0:12 0/1:G     | A                   | 0                |                  |   |   |
|       |   |     |     |       |       |       |       |      | SOMGT:0:34 0/1:G     | T                   | 0                |                  |   |   |
|       |   | ##  | 0   |       |       |       |       |      | SOMGT:0:41 0/1:G     | A                   | 0                |                  |   |   |
| 0.007 | 0 | 0   |     |       |       |       |       | 0.1  | 0.1 SOMGT:0:39 0/1:G | C                   | 0                |                  |   |   |
|       |   | ##  | 0   | 0.0   | 0.9   | 1.0,D | 1,D   | 4.6  | 3.91                 |                     | SOMGT:0:49 0/1:G | A                | 0 |   |
|       |   |     |     |       |       |       |       | 2.4  |                      |                     | SOMGT:0:69 0/1:G | A                | 0 |   |
|       |   | 0   | 0   |       |       |       |       | 0    | 0                    | SOMGT:0:88 0/1:A    | G                | 0                |   |   |
|       |   | 0   | 0   | 0.0   | 1.0   | 1.0,D | 1.000 | 4.9  | 4.26                 | 0                   | 0                | SOMGT:0:10 0/1:C | T | 0 |
|       |   |     |     |       |       |       |       | 2.11 |                      |                     | SOMGT:0:21 0/1:C | T                | 0 |   |
|       |   |     |     |       |       |       |       | 0.3  | 0.4                  | SOMGT:0:11 0/1:C    | T                | 0                |   |   |
|       |   |     |     |       |       |       |       | 0.3  | 0.4                  | SOMGT:0:12 0/1:T    | C                | 0                |   |   |
|       |   |     |     |       |       |       |       |      |                      | SOMGT:0:64 0/1:C    | A                | 0                |   |   |
|       |   |     |     |       |       |       |       |      |                      | SOMGT:0:10 0/1:A    | G                | 0                |   |   |
|       |   |     |     |       |       |       |       | 0    |                      | SOMGT:0:15 0/1:A    | C                | 0                |   |   |
|       |   |     | 0.0 | 0.8   | 0.699 | 1,D   |       | 5.6  | 4.01                 |                     | SOMGT:0:12 0/1:T | G                | 0 |   |
|       |   |     |     |       |       |       |       |      |                      | SOMGT:0:10 0/1:G    | A                | 0                |   |   |
|       |   |     |     |       |       |       |       | 0    |                      | SOMGT:0:14 0/1:A    | G                | 0                |   |   |
|       |   |     |     |       |       |       |       |      |                      | SOMGT:0:16 0/1:T    | C                | 0                |   |   |
| 2E-04 | 0 | 0   |     |       |       |       |       | 0    | 0                    | SOMGT:0:35 0/1:A    | T                | 0                |   |   |
|       |   | 0   | 0   |       |       |       |       |      |                      | DB;SOMGT:0:38 0/1:T | C                | 0                |   |   |
|       |   |     |     |       |       |       |       | 0    | 0                    | DB;SOMGT:0:55 0/1:T | C                | 0                |   |   |
|       |   |     |     |       |       |       |       | 0.1  | 0.2                  | SOMGT:0:12 0/1:C    | A                | 0                |   |   |
|       |   |     |     |       |       |       |       | 0    | 0.1                  | SOMGT:0:9,(0/1:G    | A                | 0                |   |   |
|       |   | 0   | 0   |       |       |       |       | 0    | 0                    | DB;SOMGT:0:50 0/1:A | C                | 0                |   |   |
|       |   |     |     |       |       |       |       |      |                      | SOMGT:0:17 0/1:G    | A                | 0                |   |   |
|       |   |     |     |       |       |       |       | 0    | 0.1                  | SOMGT:0:9,(0/1:G    | A                | 0                |   |   |
|       |   |     |     |       |       |       |       | 3.7  |                      |                     | SOMGT:0:85 0/1:C | T                | 0 |   |
|       |   |     |     |       |       |       |       | 5.6  | 2.81                 |                     | SOMGT:0:39 0/1:T | G                | 0 |   |
|       |   | ##  | 0   |       |       |       |       |      |                      | SOMGT:0:85 0/1:A    | G                | 0                |   |   |
|       |   | ##  | 0   |       |       |       |       |      |                      | SOMGT:0:11 0/1:C    | T                | 0                |   |   |
|       |   |     | 0.0 | 1.0   | 1.0,D | 1,D   |       | 5.7  | 5.41                 |                     | SOMGT:0:55 0/1:G | A                | 0 |   |
|       |   |     |     |       |       |       |       |      |                      | DB;SOMGT:0:37 0/1:T | G                | 0                |   |   |
|       |   |     | 0.1 | 0.0   | 0.02  | 1,N   |       |      |                      | SOMGT:0:31 0/1:C    | T                | 0                |   |   |
|       |   |     | 0.0 | 0.9   | 1.0,D | 1,D   |       | 5.3  | 4.51                 |                     | SOMGT:0:18 0/1:G | A                | 0 |   |
|       |   | ##  | 0   | 0.1   | 0.0   | 0.002 | 1,N   |      |                      | 0                   | SOMGT:0:67 0/1:G | A                | 0 |   |
|       |   | ##  | 0   |       |       |       |       |      |                      |                     | SOMGT:0:12 0/1:C | T                | 0 |   |
|       |   | 0   | 0   |       |       |       |       | 0    |                      | DB;SOMGT:0:45 0/1:G | T                | 0                |   |   |
|       |   |     |     |       |       |       |       |      |                      | SOMGT:0:24 0/1:C    | T                | 0                |   |   |
|       |   |     |     |       |       |       |       | 0    | 0.4                  | SOMGT:0:8,(0/1:A    | C                | 0                |   |   |

|       |    |                     |                     |      |      |     |                        |   |   |
|-------|----|---------------------|---------------------|------|------|-----|------------------------|---|---|
|       |    |                     |                     |      | 0    |     | SOMGT:0:54 0/1:C       | T | 0 |
|       | 0  | 0                   |                     |      |      | 0   | SOMGT:0:39 0/1:T       | A | 0 |
|       | ## | 0                   |                     | 5.4  | 2.57 |     | SOMGT:0:94 0/1:C       | T | 0 |
|       |    |                     |                     |      |      |     | SOMGT:0:9,(0/1:C       | A | 0 |
|       |    |                     |                     | 2.7  |      |     | SOMGT:0:90 0/1:C       | T | 0 |
| 2E-04 | ## | 0                   |                     |      |      |     | SOMGT:0:12 0/1:C       | T | 0 |
| ##### | ## | 0                   | 0.1(0.0(0.685 1,N   | 4.4  |      |     | SOMGT:0:44 0/1:G       | A | 0 |
|       |    |                     |                     |      |      |     | SOMGT:0:17 0/1:G       | T | 0 |
|       |    |                     |                     | 2.1  |      |     | SOMGT:0:51 0/1:A       | C | 0 |
|       |    |                     |                     |      |      | 0   | 0 SOMGT:0:38 0/1:C     | T | 0 |
|       |    |                     |                     |      |      |     | SOMGT:0:20 0/1:A       | G | 0 |
|       |    |                     |                     |      |      |     | SOMGT:0:22 0/1:G       | A | 0 |
|       |    |                     |                     |      |      |     | SOMGT:0:9,(0/1:G       | T | 0 |
|       |    |                     |                     |      |      | 0   | 0 SOMGT:0:11 0/1:A     | T | 0 |
|       |    |                     |                     |      |      |     | SOMGT:0:8,(0/1:G       | A | 0 |
|       |    |                     |                     |      |      |     | SOMGT:0:8,(0/1:T       | G | 0 |
|       |    |                     |                     |      |      |     | SOMGT:0:84 0/1:G       | A | 0 |
|       |    | 0.0                 | 0.2(0.594 0.996     | 2.32 | 0    |     | SOMGT:0:43 0/1:T       | A | 0 |
|       |    |                     |                     |      |      | 0   | SOMGT:0:20 0/1:T       | G | 0 |
|       |    |                     |                     | 2.4  | 0    |     | SOMGT:0:20 0/1:T       | G | 0 |
|       | ## | 0                   |                     | 2.22 |      |     | SOMGT:0:10 0/1:C       | T | 0 |
| 0.002 | 0  | 0                   | 0.0(0.0(0.595 0.989 | 5.2  | 2.47 | 0   | SOMGT:0:43 0/1:C       | T | 0 |
|       |    |                     |                     |      |      |     | SOMGT:0:13 0/1:G       | T | 0 |
|       | ## | 0.1(0.0(0.002 1,N   |                     |      |      | 0   | SOMGT:0:89 0/1:C       | T | 0 |
|       |    |                     |                     |      |      | 0.1 | 0.1 DB;S GT:0:47 0/1:T | C | 0 |
|       |    |                     |                     |      |      | 0.1 | 0 SOMGT:0:19 0/1:T     | C | 0 |
|       |    |                     |                     |      |      | 0   | SOMGT:0:66 0/1:C       | G | 0 |
|       |    | 0.0                 | 0.9(0.994 1,D       | 5.2  | 4.41 |     | SOMGT:0:46 0/1:A       | C | 0 |
|       |    |                     |                     |      |      | 0   | 0.1 SOMGT:0:9,(0/1:T   | C | 0 |
|       |    |                     |                     |      |      | 0   | SOMGT:0:8,(0/1:A       | G | 0 |
|       |    |                     |                     |      |      |     | SOMGT:0:25 0/1:G       | A | 0 |
|       |    |                     |                     | 1.67 |      |     | SOMGT:0:22 0/1:G       | C | 0 |
|       |    |                     |                     | 3.6  |      |     | SOMGT:0:47 0/1:C       | T | 0 |
|       |    |                     |                     | 1.42 | 0    |     | SOMGT:0:55 0/1:A       | C | 0 |
|       |    |                     |                     |      |      |     | SOMGT:0:21 0/1:G       | A | 0 |
|       |    |                     |                     |      |      |     | SOMGT:0:15 0/1:C       | T | 0 |
|       |    |                     |                     |      |      |     | SOMGT:0:15 0/1:C       | T | 0 |
|       |    |                     |                     | 3.2  | 1.26 |     | SOMGT:0:42 0/1:C       | T | 0 |
|       |    | 0.0                 | 0.9(0.993 0.990     | 3.4  | 1.91 |     | SOMGT:0:91 0/1:C       | A | 0 |
|       |    |                     |                     |      |      | 0   | 0 SOMGT:0:22 0/1:G     | A | 0 |
|       |    |                     |                     |      |      | 0   | 0 SOMGT:0:16 0/1:C     | T | 0 |
|       |    |                     |                     |      |      | 0   | SOMGT:0:8,(0/1:G       | A | 0 |
|       |    |                     |                     |      |      | 0   | SOMGT:0:8,(0/1:C       | T | 0 |
|       |    |                     |                     |      |      | 0   | 0 SOMGT:0:11 0/1:G     | T | 0 |
|       |    | 0.0(0.1(0.164 0.825 | 3.6                 | 2.01 |      |     | SOMGT:0:88 0/1:C       | T | 0 |
|       |    |                     |                     | 3.6  | 0    |     | SOMGT:0:11 0/1:A       | C | 0 |
|       |    |                     |                     |      | 0    |     | SOMGT:0:11 0/1:A       | C | 0 |
|       |    |                     |                     |      |      |     | SOMGT:0:33 0/1:G       | A | 0 |
|       |    |                     |                     | 2.8  | 1.36 |     | SOMGT:0:18 0/1:G       | A | 0 |
|       |    |                     |                     |      |      |     | SOMGT:0:13 0/1:T       | G | 0 |
|       | ## | 0                   | 0.0(0.3(0.934 1,D   | 4.3  | 1.26 |     | SOMGT:0:89 0/1:G       | A | 0 |
|       |    |                     |                     | 1.47 |      |     | SOMGT:0:24 0/1:G       | T | 0 |
|       |    |                     |                     |      |      | 0.1 | 0.3 SOMGT:0:8,(0/1:C   | T | 0 |
|       |    |                     |                     |      |      | 0.1 | 0 SOMGT:0:11 0/1:T     | A | 0 |

|   |    |                               |   |     |   |   |             |   |                    |                       |   |   |
|---|----|-------------------------------|---|-----|---|---|-------------|---|--------------------|-----------------------|---|---|
| . | .  | .                             | . | .   | . | . | .           | 0 | 0.4                | DB;SOMGT:0:22 0/1:z T | C | 0 |
| . | .  | .                             | . | .   | . | . | 1.48.       | . | .                  | SOMGT:0:47 0/1:z C    | A | 0 |
| . | .  | .                             | . | .   | . | . | .           | 0 | 0                  | SOMGT:0:10 0/1:z T    | G | 0 |
| . | .  | .                             | . | .   | . | . | .           | 0 | 0.1                | SOMGT:0:42 0/1:z G    | A | 0 |
| . | .  | .                             | . | .   | . | . | .           | 0 | 0                  | SOMGT:0:40 0/1:z C    | T | 0 |
| . | .  | .                             | . | .   | . | . | .           | . | .                  | SOMGT:0:36 0/1:z C    | T | 0 |
| . | .  | .                             | . | .   | . | . | .           | . | .                  | SOMGT:0:70 0/1:z C    | T | 0 |
| . | .  | .                             | . | .   | . | . | .           | . | .                  | SOMGT:0:26 0/1:z T    | C | 0 |
| . | .  | .                             | . | .   | . | . | .           | . | .                  | SOMGT:0:18 0/1:z A    | G | 0 |
| . | .  | .                             | . | .   | . | . | .           | 0 | 0.2                | SOMGT:0:8,(0/1:z C    | T | 0 |
| . | .  | .                             | . | .   | . | . | 1.74.       | . | .                  | SOMGT:0:99 0/1:z G    | A | 0 |
| . | .  | .                             | . | .   | . | . | .           | . | .                  | SOMGT:0:20 0/1:z G    | A | 0 |
| . | ## | 0 0.0.                        | . | 1,N | . | . | .           | . | .                  | SOMGT:0:11 0/1:z C    | T | 0 |
| . | .  | 0.0(0.9(1.0,D 1.00C 5.1 4.80. | . | .   | . | . | .           | . | .                  | SOMGT:0:71 0/1:z G    | A | 0 |
| . | .  | .                             | . | .   | . | . | .           | . | .                  | SOMGT:0:51 0/1:z T    | C | 0 |
| . | .  | .                             | . | .   | . | . | .           | 0 | .                  | SOMGT:0:41 0/1:z C    | A | 0 |
| . | .  | .                             | . | .   | . | . | .           | . | .                  | SOMGT:0:49 0/1:z G    | A | 0 |
| . | .  | .                             | . | .   | . | . | .           | 0 | .                  | SOMGT:0:93 0/1:z G    | T | 0 |
| . | .  | .                             | . | .   | . | . | 2.5         | . | 0                  | SOMGT:0:8,(0/1:z G    | A | 0 |
| . | .  | .                             | . | .   | . | . | .           | . | .                  | SOMGT:0:16 0/1:z G    | A | 0 |
| . | .  | .                             | . | .   | . | . | .           | . | .                  | SOMGT:0:49 0/1:z C    | T | 0 |
| . | .  | .                             | . | .   | . | . | .           | 0 | .                  | SOMGT:0:11 0/1:z G    | A | 0 |
| . | .  | .                             | . | .   | . | . | .           | 0 | .                  | SOMGT:0:10 0/1:z A    | G | 0 |
| . | 0  | 0 0.3.                        | . | 1,N | . | . | .           | . | .                  | SOMGT:0:24 0/1:z A    | G | 0 |
| . | 0  | 0.                            | . | .   | . | . | .           | . | .                  | SOMGT:0:14 0/1:z A    | G | 0 |
| . | .  | .                             | . | .   | . | . | .           | . | .                  | SOMGT:0:56 0/1:z G    | A | 0 |
| . | .  | .                             | . | .   | . | . | .           | . | .                  | SOMGT:0:23 0/1:z C    | T | 0 |
| . | ## | 0.                            | . | .   | . | . | 1.60.       | 0 | SOMGT:0:89 0/1:z C | T                     | 0 |   |
| . | .  | .                             | . | .   | . | . | 3.8         | . | .                  | SOMGT:0:10 0/1:z G    | A | 0 |
| . | .  | .                             | . | .   | . | . | .           | 0 | 0                  | SOMGT:0:26 0/1:z C    | T | 0 |
| . | .  | .                             | . | .   | . | . | .           | . | .                  | DB;SOMGT:0:24 0/1:z T | C | 0 |
| . | .  | .                             | . | .   | . | . | .           | 0 | .                  | DB;SOMGT:0:34 0/1:z T | C | 0 |
| . | .  | .                             | . | .   | . | . | .           | . | .                  | DB;SOMGT:0:23 0/1:z T | C | 0 |
| . | .  | .                             | . | .   | . | . | .           | . | .                  | DB;SOMGT:0:56 0/1:z C | G | 0 |
| . | .  | .                             | . | .   | . | . | .           | 0 | .                  | DB;SOMGT:0:84 0/1:z T | A | 0 |
| . | .  | .                             | . | .   | . | . | .           | . | .                  | DB;SOMGT:0:31 0/1:z T | C | 0 |
| . | .  | .                             | . | .   | . | . | .           | 0 | .                  | SOMGT:0:42 0/1:z C    | T | 0 |
| . | .  | .                             | . | .   | . | . | .           | 0 | .                  | SOMGT:0:25 0/1:z T    | G | 0 |
| . | .  | .                             | . | .   | . | . | .           | . | .                  | SOMGT:0:40 0/1:z A    | T | 0 |
| . | .  | .                             | . | .   | . | . | .           | 0 | .                  | DB;SOMGT:0:66 0/1:z A | G | 0 |
| . | .  | .                             | . | .   | . | . | .           | . | .                  | DB;SOMGT:0:49 0/1:z A | T | 0 |
| . | .  | .                             | . | .   | . | . | .           | 0 | .                  | DB;SOMGT:0:36 0/1:z C | G | 0 |
| . | .  | .                             | . | .   | . | . | .           | 0 | .                  | DB;SOMGT:0:47 0/1:z T | C | 0 |
| . | .  | .                             | . | .   | . | . | .           | 0 | .                  | DB;SOMGT:0:36 0/1:z T | C | 0 |
| . | .  | .                             | . | .   | . | . | .           | 0 | .                  | DB;SOMGT:0:44 0/1:z A | T | 0 |
| . | .  | .                             | . | .   | . | . | .           | 0 | .                  | SOMGT:0:20 0/1:z A    | G | 0 |
| . | .  | .                             | . | .   | . | . | .           | . | .                  | DB;SOMGT:0:20 0/1:z G | A | 0 |
| . | .  | .                             | . | .   | . | . | .           | 0 | .                  | DB;SOMGT:0:36 0/1:z C | G | 0 |
| . | .  | .                             | . | .   | . | . | .           | 0 | .                  | DB;SOMGT:0:33 0/1:z A | C | 0 |
| . | .  | .                             | . | .   | . | . | .           | 0 | .                  | SOMGT:0:20 0/1:z G    | A | 0 |
| . | .  | .                             | . | .   | . | . | .           | . | .                  | SOMGT:0:13 0/1:z T    | C | 0 |
| . | .  | .                             | . | .   | . | . | .           | . | .                  | SOMGT:0:9,(0/1:z A    | C | 0 |
| . | .  | .                             | . | .   | . | . | 1,A 5 5.87. | . | .                  | SOMGT:0:76 0/1:z C    | T | 0 |
| . | .  | .                             | . | .   | . | . | .           | 0 | 0                  | SOMGT:0:9,(0/1:z C    | G | 0 |

|          |     |     |       |       |       |      |                         |   |   |
|----------|-----|-----|-------|-------|-------|------|-------------------------|---|---|
|          | 0.0 | 0.5 | 0.998 | 1,N   | 2.8   |      | SOMGT:0:49 0/1:4 C      | T | 0 |
| ##       | 0   |     |       |       | 1.43  | 0    | SOMGT:0:74 0/1:7 G      | A | 0 |
|          | 0.2 | 0.0 | 0.082 | 1,D   | 3.4   | 3.15 | SOMGT:0:25 0/1:4 T      | C | 0 |
| 2E-04 ## | 0   | 0.5 | 0.0   | 0.093 | 0.995 |      | SOMGT:0:93 0/1:7 G      | A | 0 |
|          |     |     |       |       |       |      | SOMGT:0:21 0/1:3 A      | C | 0 |
| 0        | 0   |     |       |       |       |      | SOMGT:0:13 0/1:2 C      | T | 0 |
|          |     |     |       |       |       |      | SOMGT:0:89 0/1:7 G      | A | 0 |
|          |     |     |       |       |       |      | SOMGT:0:63 0/1:7 G      | T | 0 |
|          |     |     |       |       |       | 0    | SOMGT:0:28 0/1:3 C      | G | 0 |
|          |     |     |       |       |       | 0    | 0 DB;SOMGT:0:26 0/1:2 G | T | 0 |
|          |     |     |       |       |       | 0    | SOMGT:0:9,(0/1:7 C      | A | 0 |
|          |     |     |       |       |       | 0    | 0 SOMGT:0:33 0/1:3 T    | G | 0 |
|          |     |     |       |       |       | 0    | 0 DB;SOMGT:0:34 0/1:3 T | G | 0 |
|          |     |     |       |       |       | 0    | SOMGT:0:34 0/1:3 G      | A | 0 |
|          |     |     |       |       |       |      | SOMGT:0:10 0/1:3 G      | C | 0 |
|          |     |     |       |       |       |      | SOMGT:0:16 0/1:3 T      | A | 0 |
|          |     |     |       |       |       | 0    | 0 DB;SOMGT:0:37 0/1:3 A | T | 0 |
|          |     |     |       |       | 2.3   |      | SOMGT:0:44 0/1:3 T      | G | 0 |
|          |     |     |       |       |       | 0    | 0.2 SOMGT:0:34 0/1:3 G  | A | 0 |
|          |     |     |       |       |       | 0    | 0.1 SOMGT:0:77 0/1:7 T  | C | 0 |
|          |     |     |       |       | 2.6   |      | SOMGT:0:54 0/1:3 G      | A | 0 |
|          |     |     |       |       |       |      | SOMGT:0:37 0/1:3 T      | G | 0 |
|          |     |     |       |       |       |      | SOMGT:0:43 0/1:3 A      | C | 0 |
|          |     |     |       |       | 5.5   | 2.32 | SOMGT:0:45 0/1:3 C      | T | 0 |
|          |     |     |       |       |       | 0    | SOMGT:0:8,(0/1:7 T      | C | 0 |
|          |     |     |       |       |       | 0    | SOMGT:0:10 0/1:7 C      | G | 0 |
|          |     |     |       |       |       |      | SOMGT:0:13 0/1:3 G      | A | 0 |
|          |     |     |       |       |       | 0    | SOMGT:0:20 0/1:3 C      | G | 0 |
|          |     |     |       |       |       | 0    | SOMGT:0:34 0/1:7 C      | T | 0 |
|          |     |     |       |       |       | 0    | SOMGT:0:10 0/1:7 A      | G | 0 |
|          |     |     |       |       |       |      | SOMGT:0:19 0/1:3 G      | T | 0 |
|          |     |     |       |       | 3.2   |      | SOMGT:0:43 0/1:7 G      | A | 0 |
|          |     |     |       |       |       |      | SOMGT:0:10 0/1:2 G      | A | 0 |
|          |     |     |       |       |       |      | SOMGT:0:48 0/1:3 G      | T | 0 |
|          | 0.8 | 0.0 | 0.0   | 0,B   | 1,N   |      | SOMGT:0:10 0/1:2 G      | A | 0 |
|          |     |     |       |       |       |      | SOMGT:0:10 0/1:7 T      | C | 0 |
|          |     |     |       |       |       | 0    | DB;SOMGT:0:20 0/1:3 G   | A | 0 |
|          |     |     |       |       |       |      | SOMGT:0:14 0/1:2 C      | T | 0 |
|          |     |     |       |       |       | 0    | SOMGT:0:8,(0/1:7 C      | T | 0 |
|          |     |     |       |       |       | 0.1  | 0.1 SOMGT:0:28 0/1:2 G  | A | 0 |
|          |     |     |       |       |       | 0    | 0 SOMGT:0:8,(0/1:7 G    | T | 0 |
|          |     |     |       |       |       | 0    | 0 SOMGT:0:10 0/1:7 G    | A | 0 |
|          |     |     |       |       |       | 0    | 0 SOMGT:0:14 0/1:3 A    | T | 0 |
|          |     |     |       |       |       |      | SOMGT:0:28 0/1:3 G      | A | 0 |
|          |     |     |       |       |       | 0    | 0 SOMGT:0:11 0/1:3 C    | A | 0 |
|          |     |     |       |       |       | 0    | 0 SOMGT:0:10 0/1:7 G    | A | 0 |
| ##       | 0   |     |       |       |       |      | SOMGT:0:53 0/1:7 C      | T | 0 |
|          |     |     |       |       |       |      | SOMGT:0:17 0/1:2 A      | G | 0 |
|          |     |     |       |       |       | 0    | DB;SOMGT:0:36 0/1:3 C   | G | 0 |
|          |     |     |       |       |       | 0    | SOMGT:0:36 0/1:3 T      | G | 0 |
|          |     |     |       |       |       | 0    | SOMGT:0:56 0/1:7 A      | C | 0 |
|          |     |     |       |       | 3     |      | SOMGT:0:26 0/1:3 C      | T | 0 |
|          |     |     |       |       | 3.3   | 3.32 | SOMGT:0:23 0/1:4 A      | C | 0 |
|          |     |     |       |       |       |      | SOMGT:0:32 0/1:7 G      | A | 0 |

|   |       |     |     |       |        |       |       |       |                    |                       |   |   |
|---|-------|-----|-----|-------|--------|-------|-------|-------|--------------------|-----------------------|---|---|
| . | .     | .   | .   | .     | .      | .     | .     | .     | 0.                 | SOMGT:0:15 0/1:z C    | T | 0 |
| . | .     | .   | .   | .     | .      | .     | .     | .     | .                  | SOMGT:0:45 0/1:z G    | A | 0 |
| . | .     | .   | .   | .     | .      | .     | .     | .     | .                  | SOMGT:0:37 0/1:z G    | A | 0 |
| . | ##    | 0.  | .   | .     | .      | .     | .     | .     | .                  | SOMGT:0:17 0/1:z C    | T | 0 |
| . | .     | .   | .   | .     | .      | .     | .     | .     | 0                  | SOMGT:0:8,(0/1:z C    | T | 0 |
| . | .     | .   | .   | .     | .      | .     | .     | .     | 0 0                | SOMGT:0:8,(0/1:z T    | C | 0 |
| . | .     | 0.0 | 0.5 | 0.857 | 0.996  | 4.6   | 4.05. | .     | .                  | SOMGT:0:12 0/1:z G    | A | 0 |
| . | .     | .   | .   | .     | .      | .     | 1.53. | .     | .                  | DB;SOMGT:0:20 0/1:z G | A | 0 |
| . | .     | .   | .   | .     | .      | .     | .     | .     | .                  | SOMGT:0:26 0/1:z C    | T | 0 |
| . | 0     | 0.  | .   | .     | .      | .     | .     | .     | .                  | SOMGT:0:45 0/1:z C    | T | 0 |
| . | ##    | 0.  | .   | .     | .      | .     | .     | .     | .                  | SOMGT:0:92 0/1:z C    | T | 0 |
| . | .     | .   | .   | .     | .      | .     | .     | .     | 0.                 | SOMGT:0:8,(0/1:z A    | T | 0 |
| . | .     | .   | .   | .     | .      | .     | .     | .     | .                  | SOMGT:0:12 0/1:z T    | G | 0 |
| . | .     | .   | .   | .     | .      | .     | 4.4.  | .     | .                  | SOMGT:0:26 0/1:z C    | T | 0 |
| . | .     | .   | .   | .     | .      | .     | 3.1   | 1.56. | .                  | SOMGT:0:22 0/1:z C    | T | 0 |
| . | .     | .   | .   | .     | .      | .     | .     | .     | .                  | SOMGT:0:37 0/1:z C    | T | 0 |
| . | .     | .   | .   | .     | .      | .     | 3.6   | 1.91. | .                  | SOMGT:0:15 0/1:z G    | A | 0 |
| . | ##    | 0.  | 0.9 | 1.0,D | 1,N    | .     | .     | .     | .                  | SOMGT:0:79 0/1:z G    | A | 0 |
| . | .     | 0.0 | 0.0 | 0.48, | 0.992. | 1.45. | .     | .     | .                  | SOMGT:0:14 0/1:z C    | T | 0 |
| . | .     | 0.6 | 0.0 | 0.005 | 0.99C. | .     | .     | .     | .                  | SOMGT:0:40 0/1:z C    | T | 0 |
| . | .     | .   | .   | .     | .      | .     | .     | .     | .                  | SOMGT:0:12 0/1:z C    | T | 0 |
| . | .     | .   | .   | .     | .      | .     | .     | .     | .                  | SOMGT:0:32 0/1:z G    | A | 0 |
| . | .     | 0.0 | 0.4 | 0.884 | 1,D    | 5.2   | 3.32. | .     | .                  | SOMGT:0:90 0/1:z C    | T | 0 |
| . | .     | 0.1 | 0.0 | 0.107 | 1.00C  | 5.3   | 4.84. | .     | .                  | SOMGT:0:64 0/1:z C    | T | 0 |
| . | .     | .   | .   | .     | .      | .     | .     | .     | 0 0                | SOMGT:0:21 0/1:z G    | A | 0 |
| . | 0     | 0.  | .   | .     | .      | .     | .     | .     | 0 0.2              | DB;SOMGT:0:21 0/1:z G | A | 0 |
| . | .     | .   | .   | .     | .      | .     | .     | .     | .                  | SOMGT:0:22 0/1:z C    | T | 0 |
| . | .     | .   | .   | .     | .      | .     | 1.65  | 0.1   | 0.2                | SOMGT:0:9,(0/1:z C    | T | 0 |
| . | .     | .   | .   | .     | .      | .     | .     | .     | .                  | SOMGT:0:10 0/1:z A    | C | 0 |
| . | ##### | ##  | 0.  | .     | .      | .     | 2.3.  | .     | .                  | SOMGT:0:36 0/1:z G    | A | 0 |
| . | .     | .   | .   | .     | .      | .     | .     | .     | .                  | SOMGT:0:30 0/1:z T    | C | 0 |
| . | .     | .   | .   | .     | .      | .     | .     | .     | .                  | SOMGT:0:17 0/1:z T    | C | 0 |
| . | .     | .   | .   | .     | .      | .     | 2.9.  | .     | .                  | SOMGT:0:55 0/1:z C    | T | 0 |
| . | .     | .   | .   | .     | .      | .     | .     | .     | 0 0.2              | SOMGT:0:12 0/1:z G    | C | 0 |
| . | .     | .   | .   | .     | .      | .     | .     | .     | 0 0                | SOMGT:0:15 0/1:z C    | A | 0 |
| . | .     | .   | .   | .     | .      | .     | .     | .     | 0 0                | SOMGT:0:8,(0/1:z T    | G | 0 |
| . | .     | .   | .   | .     | .      | .     | .     | .     | 0.                 | SOMGT:0:33 0/1:z A    | T | 0 |
| . | .     | .   | .   | .     | .      | .     | .     | .     | .                  | SOMGT:0:22 0/1:z T    | C | 0 |
| . | .     | .   | .   | .     | .      | .     | .     | .     | 0 0                | SOMGT:0:29 0/1:z G    | C | 0 |
| . | .     | .   | .   | .     | .      | .     | .     | .     | .                  | SOMGT:0:9,(0/1:z G    | A | 0 |
| . | .     | .   | .   | .     | .      | .     | .     | .     | .                  | SOMGT:0:35 0/1:z C    | A | 0 |
| . | .     | .   | .   | .     | .      | .     | .     | .     | .                  | SOMGT:0:35 0/1:z A    | C | 0 |
| . | .     | .   | .   | .     | .      | .     | .     | 0 0.3 | SOMGT:0:8,(0/1:z A | G                     | 0 |   |
| . | .     | .   | .   | .     | .      | .     | .     | .     | 0.                 | SOMGT:0:21 0/1:z A    | C | 0 |
| . | .     | .   | .   | .     | .      | .     | .     | .     | 0 0                | SOMGT:0:23 0/1:z C    | G | 0 |
| . | .     | .   | .   | .     | .      | .     | .     | .     | 0 0                | SOMGT:0:23 0/1:z C    | T | 0 |
| . | .     | .   | .   | .     | .      | .     | .     | .     | .                  | SOMGT:0:8,(0/1:z C    | T | 0 |
| . | .     | .   | .   | .     | .      | .     | .     | 0.1   | 0.2                | SOMGT:0:24 0/1:z G    | A | 0 |
| . | .     | .   | .   | .     | .      | .     | .     | .     | 0 0.5              | SOMGT:0:8,(0/1:z G    | A | 0 |
| . | .     | .   | .   | .     | .      | .     | .     | .     | 0 0.5              | SOMGT:0:10 0/1:z G    | A | 0 |
| . | .     | .   | .   | .     | .      | .     | .     | .     | .                  | SOMGT:0:17 0/1:z A    | C | 0 |
| . | ##    | 0   | 0.0 | 0.9   | 1.0,D  | 1,D   | 5.7   | 5.14  | 0.                 | SOMGT:0:65 0/1:z C    | T | 0 |
| . | .     | .   | .   | .     | .      | .     | .     | .     | .                  | SOMGT:0:23 0/1:z C    | T | 0 |
| . | .     | .   | .   | .     | .      | .     | .     | .     | .                  | SOMGT:0:19 0/1:z C    | A | 0 |

|       |    |     |     |       |       |       |       |       |                     |                    |                     |   |   |
|-------|----|-----|-----|-------|-------|-------|-------|-------|---------------------|--------------------|---------------------|---|---|
| .     | .  | .   | .   | .     | .     | .     | .     | .     | SOMGT:0:28 0/1:4 G  | T                  | 0                   |   |   |
| .     | .  | .   | .   | .     | .     | .     | .     | .     | SOMGT:0:19 0/1:4 G  | A                  | 0                   |   |   |
| .     | .  | .   | .   | .     | .     | .     | .     | .     | SOMGT:0:24 0/1:4 A  | G                  | 0                   |   |   |
| .     | .  | .   | .   | 3.7   | 2.73. | .     | .     | .     | SOMGT:0:58 0/1:7 C  | A                  | 0                   |   |   |
| .     | .  | .   | .   | .     | .     | .     | .     | .     | SOMGT:0:39 0/1:6 A  | G                  | 0                   |   |   |
| .     | .  | .   | .   | .     | .     | .     | .     | .     | SOMGT:0:11 0/1:3 C  | A                  | 0                   |   |   |
| .     | .  | .   | .   | .     | .     | .     | .     | 0     | SOMGT:0:8,(0/1:7 C  | T                  | 0                   |   |   |
| .     | .  | .   | .   | .     | .     | .     | 0     | 0.2   | SOMGT:0:8,(0/1:7 A  | T                  | 0                   |   |   |
| .     | .  | .   | .   | .     | .     | .     | 0.1   | 0     | SOMGT:0:13 0/1:4 A  | T                  | 0                   |   |   |
| .     | .  | .   | .   | .     | .     | .     | 0.1   | 0     | SOMGT:0:36 0/1:7 T  | C                  | 0                   |   |   |
| .     | ## | 0   | 0.2 | 0.0   | 0.008 | 1.000 | 2.3   | .     | SOMGT:0:97 0/1:7 G  | A                  | 0                   |   |   |
| .     | .  | .   | .   | .     | .     | .     | .     | 0.    | DB;SGT:0:62 0/1:7 A | C                  | 0                   |   |   |
| .     | .  | .   | .   | .     | .     | .     | .     | 0.    | SOMGT:0:23 0/1:3 C  | T                  | 0                   |   |   |
| .     | .  | .   | .   | .     | .     | .     | .     | 0     | 0                   | SOMGT:0:8,(0/1:3 C | T                   | 0 |   |
| .     | .  | .   | .   | .     | .     | .     | 3     | 1.31. | SOMGT:0:14 0/1:2 G  | C                  | 0                   |   |   |
| .     | .  | .   | .   | .     | .     | .     | .     | 0     | SOMGT:0:11 0/1:7 G  | A                  | 0                   |   |   |
| .     | .  | 0.0 | 0.0 | 0.102 | 1,N   | 3.6   | .     | .     | SOMGT:0:52 0/1:6 G  | T                  | 0                   |   |   |
| .     | .  | .   | .   | .     | .     | .     | .     | .     | SOMGT:0:8,(0/1:7 A  | G                  | 0                   |   |   |
| .     | .  | .   | .   | .     | .     | .     | .     | .     | SOMGT:0:45 0/1:7 T  | C                  | 0                   |   |   |
| 0.003 | 0  | 0   | 0.4 | 0.0   | 0.007 | 1,N   | .     | .     | 0                   | 0                  | SOMGT:0:79 0/1:6 C  | T | 0 |
| .     | .  | .   | 0.0 | 0.9   | 0.999 | 1,D   | 5.1   | 5.69. | .                   | .                  | SOMGT:0:42 0/1:6 C  | T | 0 |
| .     | .  | .   | .   | .     | .     | .     | .     | .     | 0                   | 0.1                | SOMGT:0:8,(0/1:6 T  | C | 0 |
| .     | .  | .   | .   | .     | .     | 1,D   | 5.2   | 4.50. | .                   | .                  | SOMGT:0:13 0/1:3 G  | A | 0 |
| .     | .  | .   | .   | .     | .     | .     | 5.2   | 1.86. | .                   | .                  | SOMGT:0:9,(0/1:7 G  | A | 0 |
| .     | .  | 0   | 0.2 | 0.0   | 0.001 | 1,D   | 4.8   | 4.41  | 0                   | 0                  | DB;SGT:0:77 0/1:7 G | C | 0 |
| .     | .  | .   | .   | .     | .     | .     | .     | .     | 0.2                 | 0.3                | DB;SGT:0:27 0/1:7 G | A | 0 |
| .     | ## | 0   | .   | .     | .     | .     | .     | .     | 0.                  | .                  | SOMGT:0:34 0/1:3 G  | A | 0 |
| .     | .  | .   | .   | .     | .     | .     | 4.1   | .     | .                   | .                  | SOMGT:0:54 0/1:6 C  | T | 0 |
| .     | .  | .   | .   | .     | .     | .     | .     | .     | .                   | .                  | SOMGT:0:28 0/1:2 C  | G | 0 |
| .     | .  | 0.0 | 0.9 | 0.999 | 1,D   | 5.8   | 5.36. | .     | .                   | .                  | DB;SGT:0:19 0/1:6 G | A | 0 |
| .     | .  | .   | .   | .     | .     | .     | .     | .     | .                   | .                  | SOMGT:0:29 0/1:6 C  | G | 0 |
| .     | .  | .   | .   | .     | .     | .     | .     | .     | .                   | .                  | SOMGT:0:55 0/1:3 A  | G | 0 |
| .     | .  | .   | .   | .     | .     | .     | .     | .     | .                   | .                  | SOMGT:0:8,(0/1:3 G  | T | 0 |
| .     | .  | .   | .   | .     | .     | .     | .     | .     | 0                   | 0.3                | DB;SGT:0:31 0/1:2 A | G | 0 |
| .     | .  | .   | .   | .     | .     | .     | .     | .     | .                   | .                  | SOMGT:0:11 0/1:7 C  | T | 0 |
| .     | .  | 0.0 | .   | .     | 0.738 | 2.06  | .     | .     | .                   | .                  | SOMGT:0:60 0/1:7 G  | T | 0 |
| .     | .  | .   | .   | .     | .     | .     | .     | .     | .                   | .                  | SOMGT:0:30 0/1:4 G  | T | 0 |
| .     | .  | .   | .   | .     | .     | .     | .     | .     | 0                   | .                  | SOMGT:0:57 0/1:3 C  | G | 0 |
| .     | .  | .   | .   | .     | .     | .     | .     | .     | .                   | .                  | SOMGT:0:18 0/1:7 C  | T | 0 |
| .     | .  | .   | .   | .     | .     | .     | .     | .     | 0                   | .                  | SOMGT:0:8,(0/1:7 A  | G | 0 |
| .     | .  | .   | .   | .     | .     | .     | .     | .     | .                   | .                  | SOMGT:0:15 0/1:2 G  | A | 0 |
| .     | ## | .   | .   | .     | .     | 2.4   | .     | .     | 0                   | .                  | SOMGT:0:11 0/1:3 C  | T | 0 |
| .     | .  | .   | 0.9 | 0.999 | .     | 4     | 5.22. | .     | .                   | .                  | SOMGT:0:22 0/1:6 C  | T | 0 |
| .     | .  | .   | .   | .     | .     | .     | .     | .     | .                   | .                  | SOMGT:0:12 0/1:2 T  | C | 0 |
| .     | .  | .   | .   | .     | .     | .     | 2.00  | .     | .                   | .                  | SOMGT:0:9,(0/1:3 G  | A | 0 |
| .     | .  | 0   | 0.4 | 0.0   | 0.004 | 1,N   | .     | .     | 0                   | 0                  | SOMGT:0:60 0/1:7 T  | G | 0 |
| .     | .  | .   | .   | .     | .     | .     | .     | .     | .                   | .                  | SOMGT:0:16 0/1:7 G  | A | 0 |
| .     | ## | 0   | .   | .     | .     | .     | .     | .     | .                   | .                  | SOMGT:0:11 0/1:7 C  | T | 0 |
| .     | .  | .   | .   | .     | .     | .     | .     | .     | 0                   | .                  | SOMGT:0:11 0/1:2 C  | G | 0 |
| .     | .  | .   | .   | .     | .     | .     | 1.84  | .     | .                   | .                  | DB;SGT:0:33 0/1:6 C | T | 0 |
| .     | .  | .   | .   | .     | .     | .     | .     | .     | .                   | .                  | SOMGT:0:16 0/1:2 G  | A | 0 |
| .     | .  | .   | .   | .     | .     | .     | .     | .     | 0                   | 0                  | SOMGT:0:20 0/1:4 G  | A | 0 |
| .     | .  | .   | .   | .     | .     | .     | .     | .     | 0                   | .                  | SOMGT:0:13 0/1:7 A  | G | 0 |
| .     | .  | .   | .   | .     | .     | .     | .     | .     | 0                   | .                  | SOMGT:0:12 0/1:7 A  | C | 0 |



|       |    |   |                      |           |         |                     |   |   |
|-------|----|---|----------------------|-----------|---------|---------------------|---|---|
|       |    |   |                      |           | 0 0     | SOMGT:0:12 0/1:G    | C | 0 |
|       |    |   |                      | 3.5 2.17. |         | SOMGT:0:39 0/1:C    | A | 0 |
|       |    |   |                      |           | 0.2 0.4 | SOMGT:0:8,(0/1:T    | G | 0 |
|       |    |   |                      |           |         | SOMGT:0:20 0/1:G    | A | 0 |
|       | ## | 0 |                      |           | 0 0     | DB;SOMGT:0:44 0/1:G | A | 0 |
| 8E-04 | 0  | 0 |                      |           |         | SOMGT:0:23 0/1:C    | A | 0 |
|       | 0  | 0 |                      |           | 0 0     | DB;SOMGT:0:90 0/1:A | G | 0 |
|       | 0  | 0 |                      |           | 0.1 0.2 | SOMGT:0:69 0/1:T    | C | 0 |
|       |    |   |                      |           |         | SOMGT:0:33 0/1:C    | T | 0 |
|       |    |   |                      |           | 0 0     | DB;SOMGT:0:62 0/1:T | A | 0 |
|       |    |   | 1,D                  | 6 5.89.   |         | SOMGT:0:41 0/1:G    | T | 0 |
|       |    |   |                      |           |         | SOMGT:0:15 0/1:A    | C | 0 |
|       | ## | 0 |                      |           |         | SOMGT:0:36 0/1:A    | G | 0 |
|       | 0  | 0 | 0.0,0.0,0.0,B 1,N    |           |         | SOMGT:0:55 0/1:C    | T | 0 |
|       |    |   |                      |           | 0       | SOMGT:0:12 0/1:G    | T | 0 |
|       |    |   |                      |           | 0       | SOMGT:0:8,(0/1:A    | G | 0 |
|       |    |   |                      |           |         | SOMGT:0:11 0/1:C    | T | 0 |
|       |    |   |                      |           |         | DB;SOMGT:0:76 0/1:G | C | 0 |
|       |    |   |                      |           | 0       | SOMGT:0:38 0/1:C    | A | 0 |
|       |    |   |                      |           | 0       | SOMGT:0:20 0/1:G    | A | 0 |
|       |    |   |                      |           |         | SOMGT:0:74 0/1:G    | A | 0 |
|       |    |   |                      |           |         | SOMGT:0:75 0/1:C    | G | 0 |
|       |    |   |                      |           |         | DB;SOMGT:0:10 0/1:G | A | 0 |
|       |    |   |                      |           |         | SOMGT:0:21 0/1:G    | T | 0 |
|       |    |   |                      |           | 0 0     | SOMGT:0:8,(0/1:C    | T | 0 |
|       |    |   |                      |           | 0 0     | SOMGT:0:8,(0/1:T    | C | 0 |
|       |    |   |                      | 4.9       |         | SOMGT:0:57 0/1:A    | G | 0 |
|       |    |   |                      |           | 0 0     | SOMGT:0:15 0/1:T    | G | 0 |
|       |    |   |                      |           | 0       | SOMGT:0:14 0/1:T    | G | 0 |
|       |    |   |                      |           | 0       | SOMGT:0:14 0/1:T    | G | 0 |
|       |    |   |                      |           | 0 0     | SOMGT:0:8,(0/1:G    | C | 0 |
|       |    |   |                      |           |         | SOMGT:0:8,(0/1:C    | T | 0 |
|       |    |   |                      |           | 0 0     | SOMGT:0:10 0/1:C    | G | 0 |
|       |    |   |                      |           | 0 0     | SOMGT:0:12 0/1:G    | A | 0 |
|       | ## | 0 |                      |           | 0       | SOMGT:0:18 0/1:G    | A | 0 |
|       |    |   |                      |           | 0.1 0.1 | SOMGT:0:8,(0/1:C    | G | 0 |
|       |    |   |                      |           |         | SOMGT:0:8,(0/1:G    | A | 0 |
|       |    |   |                      |           |         | SOMGT:0:20 0/1:G    | T | 0 |
|       |    |   |                      |           |         | SOMGT:0:23 0/1:G    | C | 0 |
|       |    |   |                      |           |         | DB;SOMGT:0:43 0/1:C | T | 0 |
|       |    |   |                      |           |         | SOMGT:0:8,(0/1:G    | T | 0 |
|       |    |   |                      |           |         | SOMGT:0:80 0/1:G    | A | 0 |
|       |    |   |                      | 2.2       |         | SOMGT:0:17 0/1:C    | T | 0 |
|       |    |   |                      |           | 0       | SOMGT:0:19 0/1:G    | A | 0 |
|       |    |   |                      |           |         | SOMGT:0:37 0/1:C    | T | 0 |
| 0.123 | 0  | 0 | 1.0,0.0 0.004 1.000. |           | 0 0.3   | DB;SOMGT:0:20 0/1:T | C | 0 |
|       |    |   |                      |           | 0 0     | SOMGT:0:12 0/1:C    | A | 0 |
|       |    |   |                      |           | 0 0     | SOMGT:0:13 0/1:T    | A | 0 |
|       |    |   |                      |           | 0 0     | SOMGT:0:34 0/1:G    | T | 0 |
|       |    |   |                      |           | 0.1 0.2 | SOMGT:0:8,(0/1:C    | A | 0 |
|       |    |   |                      |           | 0.1 0.2 | DB;SOMGT:0:29 0/1:A | G | 0 |
|       |    |   |                      |           | 0       | SOMGT:0:22 0/1:G    | T | 0 |
|       |    |   |                      |           |         | SOMGT:0:14 0/1:G    | A | 0 |
|       |    |   |                      | 2.31.     |         | SOMGT:0:82 0/1:G    | A | 0 |

|       |    |                    |       |       |       |                             |                  |   |   |
|-------|----|--------------------|-------|-------|-------|-----------------------------|------------------|---|---|
| .     | .  | 0.0,1.0,1.0,D1,D   | 4.9   | 4.64. | .     | SOMGT:0:99 0/1:G            | A                | 0 |   |
| ##    | 0  | .                  | .     | .     | .     | SOMGT:0:50 0/1:C            | T                | 0 |   |
| .     | .  | .                  | .     | .     | 0     | 0 SOMGT:0:15 0/1:C          | T                | 0 |   |
| .     | .  | .                  | .     | .     | .     | SOMGT:0:47 0/1:T            | G                | 0 |   |
| .     | .  | .                  | .     | .     | 0.1   | 0.3 SOMGT:0:8,(0/1:T        | A                | 0 |   |
| .     | .  | .                  | .     | .     | .     | SOMGT:0:8,(0/1:G            | C                | 0 |   |
| .     | .  | .                  | .     | .     | .     | SOMGT:0:43 0/1:T            | A                | 0 |   |
| .     | .  | .                  | .     | .     | .     | SOMGT:0:30 0/1:G            | A                | 0 |   |
| .     | .  | .                  | .     | .     | .     | SOMGT:0:52 0/1:C            | T                | 0 |   |
| .     | .  | .                  | .     | .     | 2.7   | 0.4 0.5 DB;SOMGT:0:31 0/1:C | G                | 0 |   |
| .     | .  | .                  | .     | .     | .     | SOMGT:0:16 0/1:C            | G                | 0 |   |
| .     | .  | .                  | .     | .     | .     | SOMGT:0:18 0/1:C            | T                | 0 |   |
| .     | .  | .                  | .     | .     | 0.1   | 0 SOMGT:0:9,(0/1:A          | C                | 0 |   |
| .     | .  | .                  | .     | .     | 0     | 0 SOMGT:0:39 0/1:T          | C                | 0 |   |
| .     | .  | .                  | .     | .     | .     | SOMGT:0:11 0/1:T            | G                | 0 |   |
| .     | .  | .                  | .     | .     | 3.5   | .                           | SOMGT:0:38 0/1:G | A | 0 |
| .     | .  | .                  | .     | .     | 1.64. | .                           | SOMGT:0:52 0/1:G | A | 0 |
| .     | .  | .                  | .     | .     | 1.75. | .                           | SOMGT:0:22 0/1:G | A | 0 |
| .     | .  | .                  | .     | .     | 2.9   | .                           | SOMGT:0:27 0/1:G | C | 0 |
| .     | .  | .                  | .     | .     | .     | SOMGT:0:12 0/1:T            | C                | 0 |   |
| .     | .  | 0.0,0.1:0.9121,N   | 2.8   | .     | .     | SOMGT:0:90 0/1:C            | T                | 0 |   |
| .     | .  | .                  | .     | .     | .     | SOMGT:0:11 0/1:G            | A                | 0 |   |
| ##    | 0  | .                  | .     | .     | .     | SOMGT:0:53 0/1:G            | A                | 0 |   |
| .     | .  | .                  | .     | .     | .     | SOMGT:0:79 0/1:G            | A                | 0 |   |
| .     | .  | .                  | .     | .     | .     | SOMGT:0:21 0/1:C            | A                | 0 |   |
| .     | .  | .                  | .     | .     | 0     | 0.2 DB;SOMGT:0:35 0/1:A     | G                | 0 |   |
| .     | .  | .                  | .     | .     | .     | SOMGT:0:13 0/1:A            | T                | 0 |   |
| .     | .  | .                  | .     | .     | .     | SOMGT:0:52 0/1:C            | T                | 0 |   |
| .     | .  | .                  | .     | .     | .     | SOMGT:0:8,(0/1:C            | T                | 0 |   |
| ##    | 0  | 0.0,0.9:1.0,D 0.96 | 2.9   | 3.63. | .     | SOMGT:0:33 0/1:G            | T                | 0 |   |
| .     | .  | .                  | .     | .     | 0     | SOMGT:0:13 0/1:T            | C                | 0 |   |
| .     | .  | .                  | .     | .     | 0.1   | 0.3 SOMGT:0:61 0/1:C        | G                | 0 |   |
| .     | .  | 0.0:0.9:1.0,D 1.00 | 5.2   | 3.95. | .     | SOMGT:0:60 0/1:T            | A                | 0 |   |
| .     | .  | .                  | 3.7   | 2.31  | 0     | SOMGT:0:11 0/1:T            | C                | 0 |   |
| .     | .  | .                  | 2.9   | .     | .     | SOMGT:0:64 0/1:G            | A                | 0 |   |
| .     | .  | .                  | 5.7   | 1.53. | .     | SOMGT:0:53 0/1:T            | C                | 0 |   |
| ##### | ## | 0 0.2:0.0:0.00     | 4.3   | 2.22. | .     | SOMGT:0:63 0/1:G            | A                | 0 |   |
| .     | .  | .                  | 4.3   | 1.40. | .     | SOMGT:0:19 0/1:C            | T                | 0 |   |
| .     | .  | .                  | 1,A   | 5.99. | .     | SOMGT:0:59 0/1:G            | A                | 0 |   |
| .     | .  | .                  | .     | .     | .     | SOMGT:0:23 0/1:C            | G                | 0 |   |
| .     | .  | 0.0:0.9:0.997      | 4.1   | 4.28. | .     | SOMGT:0:51 0/1:C            | T                | 0 |   |
| .     | .  | .                  | .     | .     | 0     | SOMGT:0:15 0/1:G            | A                | 0 |   |
| .     | .  | .                  | .     | .     | 0     | SOMGT:0:17 0/1:A            | G                | 0 |   |
| .     | .  | .                  | .     | .     | .     | SOMGT:0:37 0/1:G            | C                | 0 |   |
| .     | .  | 0.0,0.9:1.0,D 1.00 | 3.9   | 3.50. | .     | SOMGT:0:40 0/1:C            | G                | 0 |   |
| .     | .  | .                  | 6     | 1.44. | .     | SOMGT:0:37 0/1:A            | G                | 0 |   |
| .     | .  | .                  | 1.48. | .     | .     | SOMGT:0:24 0/1:A            | C                | 0 |   |
| .     | .  | .                  | .     | .     | 0     | 0 SOMGT:0:8,(0/1:T          | C                | 0 |   |
| .     | .  | .                  | .     | .     | .     | SOMGT:0:91 0/1:G            | T                | 0 |   |
| .     | .  | .                  | .     | .     | .     | SOMGT:0:16 0/1:C            | G                | 0 |   |
| .     | .  | .                  | .     | .     | 0.1   | 0.2 SOMGT:0:13 0/1:C        | A                | 0 |   |
| ##    | 0  | 0.0:0.4:0.94       | 3.8   | 4.06. | .     | SOMGT:0:10 0/1:G            | A                | 0 |   |
| .     | .  | .                  | 4.4   | 1.49. | .     | SOMGT:0:37 0/1:T            | A                | 0 |   |
| .     | .  | .                  | 4.6   | 1.64. | .     | SOMGT:0:84 0/1:G            | T                | 0 |   |

|  |    |     |       |       |       |      |      |                    |                      |     |   |                      |                    |   |   |
|--|----|-----|-------|-------|-------|------|------|--------------------|----------------------|-----|---|----------------------|--------------------|---|---|
|  |    | 0.9 | 0.998 | 1,N   | 2.2   |      |      | SOMGT:0:22 0/1:2 T | C                    | 0   |   |                      |                    |   |   |
|  |    | 0.2 | 0.0   | 0.396 | 0.996 | 5.8  | 3.14 | 0                  | SOMGT:0:17 0/1:2 G   | C   | 0 |                      |                    |   |   |
|  |    |     |       |       |       |      |      |                    | SOMGT:0:75 0/1:2 G   | A   | 0 |                      |                    |   |   |
|  |    |     |       |       |       |      |      | 0                  | SOMGT:0:16 0/1:2 A   | C   | 0 |                      |                    |   |   |
|  |    |     |       |       |       |      |      |                    | SOMGT:0:52 0/1:2 C   | T   | 0 |                      |                    |   |   |
|  |    |     |       |       |       |      |      |                    | SOMGT:0:16 0/1:2 C   | T   | 0 |                      |                    |   |   |
|  |    |     |       |       |       |      |      | 0                  | SOMGT:0:15 0/1:2 A   | G   | 0 |                      |                    |   |   |
|  |    |     |       |       |       |      |      |                    | SOMGT:0:55 0/1:2 G   | T   | 0 |                      |                    |   |   |
|  |    |     |       |       |       |      |      | 0                  | 0 SOMGT:0:66 0/1:2 C | A   | 0 |                      |                    |   |   |
|  |    |     |       |       |       |      |      | 0                  | 0 SOMGT:0:70 0/1:2 A | G   | 0 |                      |                    |   |   |
|  |    |     |       |       |       | 1.30 |      |                    | SOMGT:0:46 0/1:2 C   | A   | 0 |                      |                    |   |   |
|  |    |     |       |       |       | 3    |      |                    | SOMGT:0:11 0/1:2 A   | G   | 0 |                      |                    |   |   |
|  |    |     |       |       |       |      |      |                    | SOMGT:0:35 0/1:2 G   | A   | 0 |                      |                    |   |   |
|  |    |     |       |       |       | 2.7  |      |                    | SOMGT:0:68 0/1:2 C   | T   | 0 |                      |                    |   |   |
|  |    |     |       |       |       |      |      |                    | SOMGT:0:44 0/1:2 C   | T   | 0 |                      |                    |   |   |
|  |    |     |       |       |       |      |      |                    | SOMGT:0:12 0/1:2 C   | A   | 0 |                      |                    |   |   |
|  |    |     |       |       |       |      |      | 0                  | SOMGT:0:37 0/1:2 C   | T   | 0 |                      |                    |   |   |
|  |    |     |       |       |       |      |      | 0                  | 0 SOMGT:0:10 0/1:2 T | C   | 0 |                      |                    |   |   |
|  |    |     |       |       |       |      |      |                    | SOMGT:0:9,0 0/1:2 C  | A   | 0 |                      |                    |   |   |
|  |    |     |       |       |       |      |      | 0                  | 0 SOMGT:0:47 0/1:2 G | A   | 0 |                      |                    |   |   |
|  |    |     |       |       |       |      |      |                    | SOMGT:0:44 0/1:2 C   | T   | 0 |                      |                    |   |   |
|  | ## | 0   |       |       |       | 5.4  | 2.61 |                    | SOMGT:0:48 0/1:2 C   | T   | 0 |                      |                    |   |   |
|  |    |     |       |       |       |      |      |                    | SOMGT:0:58 0/1:2 G   | A   | 0 |                      |                    |   |   |
|  | 0  | 0   |       |       |       |      |      | 0                  | 0 SOMGT:0:21 0/1:2 C | T   | 0 |                      |                    |   |   |
|  |    |     |       |       |       | 3.2  |      |                    | SOMGT:0:15 0/1:2 C   | G   | 0 |                      |                    |   |   |
|  |    |     |       |       |       | 3.9  |      |                    | SOMGT:0:12 0/1:2 G   | A   | 0 |                      |                    |   |   |
|  |    |     |       |       |       | 0.0  | 0.0  | 0.001              | 0.997                | 2.8 |   |                      | SOMGT:0:67 0/1:2 C | T | 0 |
|  |    |     |       |       |       |      |      |                    |                      | 0   |   | SOMGT:0:11 0/1:2 A   | G                  | 0 |   |
|  |    |     |       |       |       |      |      |                    |                      | 0   |   | SOMGT:0:20 0/1:2 T   | C                  | 0 |   |
|  |    |     |       |       |       |      |      |                    |                      |     |   | SOMGT:0:12 0/1:2 C   | A                  | 0 |   |
|  |    |     |       |       |       |      |      |                    |                      |     |   | SOMGT:0:17 0/1:2 C   | T                  | 0 |   |
|  |    |     |       |       |       |      |      |                    |                      |     |   | SOMGT:0:32 0/1:2 C   | T                  | 0 |   |
|  |    |     |       |       |       |      |      |                    |                      | 0   |   | SOMGT:0:11 0/1:2 G   | T                  | 0 |   |
|  |    |     |       |       |       |      |      |                    |                      | 0   |   | DB;S GT:0:51 0/1:2 G | C                  | 0 |   |
|  |    |     |       |       |       |      |      |                    |                      | 0   |   | DB;S GT:0:38 0/1:2 A | T                  | 0 |   |
|  |    |     |       |       |       |      |      |                    |                      | 0   |   | DB;S GT:0:37 0/1:2 T | C                  | 0 |   |
|  |    |     |       |       |       |      |      |                    |                      |     |   | DB;S GT:0:36 0/1:2 A | G                  | 0 |   |
|  |    |     |       |       |       |      |      |                    |                      | 0   |   | DB;S GT:0:62 0/1:2 T | C                  | 0 |   |
|  |    |     |       |       |       |      |      |                    |                      |     |   | DB;S GT:0:78 0/1:2 G | T                  | 0 |   |
|  |    |     |       |       |       |      |      |                    |                      | 0   |   | DB;S GT:0:49 0/1:2 C | G                  | 0 |   |
|  |    |     |       |       |       |      |      |                    |                      | 0   |   | DB;S GT:0:46 0/1:2 C | T                  | 0 |   |
|  |    |     |       |       |       |      |      |                    |                      | 0   |   | DB;S GT:0:35 0/1:2 T | G                  | 0 |   |
|  |    |     |       |       |       |      |      |                    |                      | 0   |   | SOMGT:0:50 0/1:2 A   | G                  | 0 |   |
|  |    |     |       |       |       |      |      |                    |                      |     |   | DB;S GT:0:52 0/1:2 A | C                  | 0 |   |
|  |    |     |       |       |       |      |      |                    |                      | 0   |   | DB;S GT:0:36 0/1:2 T | G                  | 0 |   |
|  |    |     |       |       |       |      |      |                    |                      | 0   |   | SOMGT:0:34 0/1:2 A   | G                  | 0 |   |
|  |    |     |       |       |       |      |      |                    |                      | 0   |   | DB;S GT:0:55 0/1:2 C | G                  | 0 |   |
|  |    |     |       |       |       |      |      |                    |                      |     |   | DB;S GT:0:80 0/1:2 C | T                  | 0 |   |
|  |    |     |       |       |       |      |      |                    |                      |     |   | DB;S GT:0:70 0/1:2 G | T                  | 0 |   |
|  |    |     |       |       |       |      |      |                    |                      |     |   | DB;S GT:0:66 0/1:2 A | T                  | 0 |   |
|  |    |     |       |       |       |      |      |                    |                      |     |   | SOMGT:0:18 0/1:2 G   | T                  | 0 |   |
|  |    |     |       |       |       |      |      |                    |                      |     |   | DB;S GT:0:19 0/1:2 C | T                  | 0 |   |
|  |    |     |       |       |       |      |      |                    |                      |     |   | SOMGT:0:17 0/1:2 G   | C                  | 0 |   |
|  |    |     |       |       |       |      |      |                    |                      | 0   |   | DB;S GT:0:44 0/1:2 T | C                  | 0 |   |

|       |    |     |     |       |          |     |      |      |                  |                  |               |   |   |
|-------|----|-----|-----|-------|----------|-----|------|------|------------------|------------------|---------------|---|---|
| .     | .  | .   | .   | .     | .        | .   | .    | .    | SOMGT:0:11 0/1:G | A                | 0             |   |   |
| .     | .  | .   | .   | .     | .        | .   | 0    | .    | SOMGT:0:14 0/1:C | G                | 0             |   |   |
| .     | .  | .   | .   | .     | .        | .   | .    | .    | SOMGT:0:14 0/1:C | T                | 0             |   |   |
| .     | .  | .   | .   | .     | .        | .   | .    | .    | SOMGT:0:28 0/1:C | G                | 0             |   |   |
| .     | 0  | 0   | 0.0 | 0.0   | 0.0441,D | 5.2 | .    | 0    | 0                | SOMGT:0:12 0/1:G | C             | 0 |   |
| .     | .  | .   | .   | .     | .        | .   | 0    | 0.1  | DB;S             | GT:0:39 0/1:T    | C             | 0 |   |
| .     | .  | .   | .   | .     | .        | .   | .    | .    | SOMGT:0:15 0/1:G | T                | 0             |   |   |
| .     | .  | 0.0 | 0.9 | 0.988 | 1,D      | 5.3 | 3.11 | .    | .                | SOMGT:0:15 0/1:C | A             | 0 |   |
| .     | ## | .   | 0.0 | 0.8   | 0.933    | 1,D | 5.3  | 3.92 | .                | SOMGT:0:15 0/1:C | T             | 0 |   |
| .     | .  | .   | .   | .     | .        | .   | .    | 0    | 0                | SOMGT:0:18 0/1:C | A             | 0 |   |
| .     | .  | .   | .   | .     | .        | .   | .    | 0    | 0.1              | SOMGT:0:9,(0/1:C | A             | 0 |   |
| .     | .  | .   | .   | .     | .        | .   | .    | 0    | 0.2              | SOMGT:0:9,(0/1:A | G             | 0 |   |
| .     | .  | 0.7 | 0.0 | 0.042 | 1,N      | .   | .    | .    | .                | SOMGT:0:35 0/1:G | A             | 0 |   |
| .     | .  | .   | .   | .     | .        | .   | .    | 0    | 0                | SOMGT:0:17 0/1:A | C             | 0 |   |
| .     | .  | .   | .   | .     | .        | .   | .    | .    | .                | SOMGT:0:94 0/1:C | T             | 0 |   |
| .     | .  | .   | .   | .     | .        | .   | 2.31 | 0    | 0                | SOMGT:0:36 0/1:G | A             | 0 |   |
| .     | .  | .   | .   | .     | .        | .   | .    | .    | .                | SOMGT:0:11 0/1:C | T             | 0 |   |
| .     | .  | .   | .   | .     | .        | .   | .    | .    | .                | SOMGT:0:16 0/1:C | T             | 0 |   |
| .     | .  | .   | .   | .     | .        | .   | .    | 0.1  | 0.1              | SOMGT:0:16 0/1:T | A             | 0 |   |
| .     | .  | .   | .   | .     | .        | .   | .    | 0.2  | 0.2              | SOMGT:0:10 0/1:A | G             | 0 |   |
| .     | .  | .   | .   | .     | .        | .   | .    | 0    | .                | SOMGT:0:51 0/1:C | G             | 0 |   |
| .     | .  | .   | .   | .     | .        | .   | .    | 0    | 0                | SOMGT:0:37 0/1:T | G             | 0 |   |
| .     | .  | .   | .   | .     | .        | .   | .    | 0    | .                | DB;S             | GT:0:37 0/1:A | G | 0 |
| .     | .  | .   | .   | .     | .        | .   | .    | 0    | .                | SOMGT:0:10 0/1:T | G             | 0 |   |
| .     | .  | .   | .   | .     | .        | .   | .    | .    | .                | SOMGT:0:9,(0/1:C | T             | 0 |   |
| .     | .  | .   | .   | .     | .        | .   | .    | .    | .                | SOMGT:0:45 0/1:G | C             | 0 |   |
| .     | .  | .   | .   | .     | .        | .   | .    | .    | .                | SOMGT:0:45 0/1:C | T             | 0 |   |
| .     | .  | .   | .   | .     | .        | .   | .    | 0.1  | 0                | DB;S             | GT:0:38 0/1:T | C | 0 |
| .     | .  | .   | .   | .     | .        | .   | .    | 0    | 0                | SOMGT:0:9,(0/1:T | A             | 0 |   |
| .     | .  | .   | .   | .     | .        | .   | .    | 0    | 0                | SOMGT:0:8,(0/1:T | A             | 0 |   |
| .     | .  | .   | .   | .     | .        | .   | 2.77 | .    | .                | SOMGT:0:59 0/1:C | G             | 0 |   |
| .     | .  | .   | .   | .     | .        | .   | 2.7  | 2.69 | .                | SOMGT:0:28 0/1:G | A             | 0 |   |
| .     | .  | .   | .   | .     | .        | .   | .    | 0    | 0                | SOMGT:0:96 0/1:G | T             | 0 |   |
| .     | ## | 0   | .   | .     | .        | .   | .    | 0    | .                | SOMGT:0:96 0/1:G | A             | 0 |   |
| .     | .  | 0.6 | 0.0 | 0.066 | 1,D      | 5.1 | 2.42 | .    | .                | SOMGT:0:53 0/1:C | T             | 0 |   |
| .     | .  | .   | .   | .     | .        | .   | .    | 0    | .                | SOMGT:0:8,(0/1:G | A             | 0 |   |
| .     | .  | .   | .   | .     | .        | .   | .    | .    | .                | DB;S             | GT:0:26 0/1:C | T | 0 |
| .     | .  | .   | .   | .     | .        | .   | .    | 0    | 0                | SOMGT:0:15 0/1:A | T             | 0 |   |
| .     | .  | .   | .   | .     | .        | .   | .    | 0    | 0                | SOMGT:0:8,(0/1:G | C             | 0 |   |
| .     | .  | .   | .   | .     | .        | .   | .    | 0    | 0                | SOMGT:0:11 0/1:G | A             | 0 |   |
| .     | .  | .   | .   | .     | .        | .   | .    | 0    | 0                | SOMGT:0:10 0/1:C | T             | 0 |   |
| .     | .  | .   | .   | .     | .        | .   | .    | .    | .                | SOMGT:0:42 0/1:C | A             | 0 |   |
| ##### | ## | 0   | .   | .     | .        | .   | .    | .    | .                | SOMGT:0:10 0/1:G | A             | 0 |   |
| .     | .  | .   | .   | .     | .        | .   | .    | .    | .                | SOMGT:0:54 0/1:G | A             | 0 |   |
| .     | .  | .   | .   | .     | .        | .   | .    | .    | .                | SOMGT:0:56 0/1:G | T             | 0 |   |
| .     | .  | 0.1 | 0.8 | 0.985 | 0.645    | 5.1 | 2.59 | .    | .                | SOMGT:0:15 0/1:G | A             | 0 |   |
| .     | .  | .   | .   | .     | .        | .   | .    | .    | .                | SOMGT:0:56 0/1:T | C             | 0 |   |
| .     | .  | .   | .   | .     | .        | .   | 4.1  | 1.24 | .                | SOMGT:0:56 0/1:C | T             | 0 |   |
| .     | .  | .   | .   | .     | .        | .   | .    | .    | .                | SOMGT:0:51 0/1:G | A             | 0 |   |
| .     | .  | .   | .   | .     | .        | .   | .    | .    | .                | SOMGT:0:11 0/1:G | C             | 0 |   |
| .     | .  | .   | .   | .     | .        | .   | .    | 0    | .                | SOMGT:0:18 0/1:C | G             | 0 |   |
| .     | .  | .   | .   | .     | .        | .   | .    | .    | .                | SOMGT:0:90 0/1:G | C             | 0 |   |
| .     | .  | .   | .   | .     | .        | .   | .    | 0.2  | 0.2              | SOMGT:0:9,(0/1:T | A             | 0 |   |
| .     | ## | 0   | 0.0 | 0.7   | 0.928    | 1,N | 2.55 | .    | .                | SOMGT:0:85 0/1:G | A             | 0 |   |

|  |  |  |  |  |  |     |     |      |         |               |       |   |   |
|--|--|--|--|--|--|-----|-----|------|---------|---------------|-------|---|---|
|  |  |  |  |  |  | 0.3 | 0.5 | DB;S | GT:0:48 | 0/1:T         | C     | 0 |   |
|  |  |  |  |  |  |     |     |      | SOM     | GT:0:8,(0/1:G | A     | 0 |   |
|  |  |  |  |  |  |     |     |      | SOM     | GT:0:61       | 0/1:T | G | 0 |
|  |  |  |  |  |  |     |     |      | SOM     | GT:0:46       | 0/1:G | A | 0 |
|  |  |  |  |  |  |     |     |      | SOM     | GT:0:58       | 0/1:G | A | 0 |
|  |  |  |  |  |  |     |     |      | SOM     | GT:0:45       | 0/1:G | A | 0 |
|  |  |  |  |  |  |     |     |      | SOM     | GT:0:12       | 0/1:C | T | 0 |
|  |  |  |  |  |  |     |     |      | SOM     | GT:0:25       | 0/1:C | A | 0 |
|  |  |  |  |  |  |     |     |      | SOM     | GT:0:32       | 0/1:G | A | 0 |
|  |  |  |  |  |  |     |     |      | SOM     | GT:0:55       | 0/1:G | A | 0 |
|  |  |  |  |  |  |     |     |      | SOM     | GT:0:8,(0/1:C | G     | 0 |   |
|  |  |  |  |  |  |     |     |      | SOM     | GT:0:8,(0/1:G | A     | 0 |   |
|  |  |  |  |  |  |     |     |      | SOM     | GT:0:48       | 0/1:G | A | 0 |
|  |  |  |  |  |  |     |     |      | SOM     | GT:0:21       | 0/1:T | C | 0 |
|  |  |  |  |  |  |     |     |      | SOM     | GT:0:27       | 0/1:G | T | 0 |
|  |  |  |  |  |  |     |     |      | DB;S    | GT:0:32       | 0/1:G | A | 0 |
|  |  |  |  |  |  |     |     |      | SOM     | GT:0:8,(0/1:T | A     | 0 |   |
|  |  |  |  |  |  |     |     |      | SOM     | GT:0:9,(0/1:A | C     | 0 |   |
|  |  |  |  |  |  |     |     |      | SOM     | GT:0:11       | 0/1:T | G | 0 |
|  |  |  |  |  |  |     |     |      | SOM     | GT:0:70       | 0/1:G | A | 0 |
|  |  |  |  |  |  |     |     |      | SOM     | GT:0:34       | 0/1:G | A | 0 |
|  |  |  |  |  |  |     |     |      | SOM     | GT:0:14       | 0/1:C | T | 0 |
|  |  |  |  |  |  |     |     |      | SOM     | GT:0:18       | 0/1:G | A | 0 |
|  |  |  |  |  |  |     |     |      | SOM     | GT:0:10       | 0/1:C | T | 0 |
|  |  |  |  |  |  |     |     |      | SOM     | GT:0:22       | 0/1:G | T | 0 |
|  |  |  |  |  |  |     |     |      | SOM     | GT:0:55       | 0/1:C | T | 0 |
|  |  |  |  |  |  |     |     |      | SOM     | GT:0:31       | 0/1:G | A | 0 |
|  |  |  |  |  |  |     |     |      | DB;S    | GT:0:34       | 0/1:G | C | 0 |
|  |  |  |  |  |  |     |     |      | SOM     | GT:0:18       | 0/1:G | A | 0 |
|  |  |  |  |  |  |     |     |      | SOM     | GT:0:11       | 0/1:G | A | 0 |
|  |  |  |  |  |  |     |     |      | SOM     | GT:0:8,(0/1:C | A     | 0 |   |
|  |  |  |  |  |  |     |     |      | SOM     | GT:0:12       | 0/1:T | A | 0 |
|  |  |  |  |  |  |     |     |      | SOM     | GT:0:21       | 0/1:G | C | 0 |
|  |  |  |  |  |  |     |     |      | SOM     | GT:0:23       | 0/1:G | T | 0 |
|  |  |  |  |  |  |     |     |      | SOM     | GT:0:12       | 0/1:G | T | 0 |
|  |  |  |  |  |  |     |     |      | SOM     | GT:0:9,(0/1:A | C     | 0 |   |
|  |  |  |  |  |  |     |     |      | SOM     | GT:0:15       | 0/1:C | T | 0 |
|  |  |  |  |  |  |     |     |      | SOM     | GT:0:21       | 0/1:G | C | 0 |
|  |  |  |  |  |  |     |     |      | SOM     | GT:0:58       | 0/1:C | T | 0 |
|  |  |  |  |  |  |     |     |      | SOM     | GT:0:47       | 0/1:T | A | 0 |
|  |  |  |  |  |  |     |     |      | SOM     | GT:0:11       | 0/1:G | A | 0 |
|  |  |  |  |  |  |     |     |      | SOM     | GT:0:52       | 0/1:A | G | 0 |
|  |  |  |  |  |  |     |     |      | SOM     | GT:0:39       | 0/1:C | A | 0 |
|  |  |  |  |  |  |     |     |      | SOM     | GT:0:49       | 0/1:C | T | 0 |
|  |  |  |  |  |  |     |     |      | SOM     | GT:0:36       | 0/1:T | G | 0 |
|  |  |  |  |  |  |     |     |      | SOM     | GT:0:13       | 0/1:G | C | 0 |
|  |  |  |  |  |  |     |     |      | SOM     | GT:0:29       | 0/1:G | A | 0 |
|  |  |  |  |  |  |     |     |      | SOM     | GT:0:41       | 0/1:G | A | 0 |
|  |  |  |  |  |  |     |     |      | SOM     | GT:0:11       | 0/1:C | A | 0 |
|  |  |  |  |  |  |     |     |      | SOM     | GT:0:56       | 0/1:C | T | 0 |
|  |  |  |  |  |  |     |     |      | SOM     | GT:0:30       | 0/1:C | T | 0 |
|  |  |  |  |  |  |     |     |      | SOM     | GT:0:8,(0/1:A | G     | 0 |   |
|  |  |  |  |  |  |     |     |      | SOM     | GT:0:33       | 0/1:G | A | 0 |
|  |  |  |  |  |  |     |     |      | SOM     | GT:0:90       | 0/1:C | T | 0 |

|       |    |     |     |       |       |       |          |         |                  |   |   |
|-------|----|-----|-----|-------|-------|-------|----------|---------|------------------|---|---|
| ##    | 0  |     |     |       |       |       |          |         | SOMGT:0:41 0/1:G | T | 0 |
|       |    |     |     |       |       |       |          | 0       | SOMGT:0:62 0/1:T | C | 0 |
|       |    |     |     |       |       |       |          | 0.1 0.1 | SOMGT:0:47 0/1:T | C | 0 |
|       |    |     |     |       |       |       |          | 0 0     | DB;G:0:43 0/1:T  | C | 0 |
|       |    |     |     |       |       |       |          | 0.1 0.2 | DB;G:0:19 0/1:T  | G | 0 |
|       |    |     |     |       |       |       |          | 0.1 0.2 | DB;G:0:19 0/1:G  | C | 0 |
|       |    |     |     |       |       |       |          | 0.3 0.3 | DB;G:0:63 0/1:C  | T | 0 |
| ##    | 0  | 0.2 | 0.3 | 0.966 | 1.000 | 5.8   | 3.60     | 0       | SOMGT:0:12 0/1:C | T | 0 |
|       |    |     |     |       |       |       |          |         | SOMGT:0:49 0/1:G | A | 0 |
|       |    |     |     |       |       |       | 1.42     |         | SOMGT:0:38 0/1:G | T | 0 |
|       |    |     |     |       |       |       | 2.7      | 0       | SOMGT:0:19 0/1:T | G | 0 |
|       |    | 0.0 | 0.8 | 0.992 | 1,N   | 4.5   | 1.58     |         | SOMGT:0:40 0/1:G | T | 0 |
|       |    |     |     |       |       |       |          |         | SOMGT:0:66 0/1:C | T | 0 |
|       |    | 0.0 | 0.9 | 1.0   | D 1,D | 2.95  |          |         | SOMGT:0:66 0/1:G | A | 0 |
|       |    |     |     |       |       |       |          | 0       | SOMGT:0:15 0/1:T | C | 0 |
|       |    |     |     |       |       |       |          | 0       | SOMGT:0:8,0/1:G  | A | 0 |
|       |    |     |     |       |       |       |          | 0 0.3   | SOMGT:0:14 0/1:C | G | 0 |
|       |    |     |     |       |       |       |          | 0 0     | SOMGT:0:70 0/1:G | A | 0 |
|       |    |     |     |       |       |       |          |         | SOMGT:0:30 0/1:C | G | 0 |
|       |    |     |     |       |       |       |          | 0.1 0   | DB;G:0:20 0/1:G  | C | 0 |
|       |    |     |     |       |       |       |          | 0 0     | SOMGT:0:8,0/1:A  | G | 0 |
|       |    |     |     |       |       |       |          |         | SOMGT:0:27 0/1:C | G | 0 |
|       |    |     |     |       |       |       |          | 0 0     | DB;G:0:34 0/1:T  | A | 0 |
| ##    | 0  |     |     |       |       |       |          |         | SOMGT:0:60 0/1:G | A | 0 |
|       |    | 0.0 | 0.9 | 0.998 | 0.921 | 2.1   | 2.54     |         | SOMGT:0:56 0/1:G | T | 0 |
|       |    |     |     |       |       |       |          |         | SOMGT:0:20 0/1:G | C | 0 |
| ##    | 0  | 0.0 | 1.0 | 1.0   | D 1,D | 5     | 5.82     |         | SOMGT:0:81 0/1:G | A | 0 |
| 0.002 | 0  | 0   | 1.0 | 0.0   | 0.0,B | 1.000 | 3.3      | 0 0.1   | SOMGT:0:24 0/1:A | G | 0 |
| ##### | ## | 0   | 0.0 | 0.0   | 0.047 | 1,N   | 1.51     |         | SOMGT:0:27 0/1:C | T | 0 |
|       | 0  | 0   |     |       |       |       |          | 0 0     | SOMGT:0:40 0/1:A | G | 0 |
|       |    | 1.0 | 0.0 | 0.0   | B 1,D | 5.4   |          |         | SOMGT:0:34 0/1:C | A | 0 |
|       |    |     |     |       |       |       | 1.35     |         | SOMGT:0:54 0/1:T | A | 0 |
|       |    |     |     |       |       |       |          |         | SOMGT:0:11 0/1:G | A | 0 |
|       |    |     |     |       |       |       | 3.2 1.43 | 0 0     | SOMGT:0:11 0/1:G | A | 0 |
|       |    |     |     |       |       |       |          |         | SOMGT:0:51 0/1:G | C | 0 |
|       |    |     |     |       |       |       |          |         | SOMGT:0:16 0/1:T | C | 0 |
|       |    |     |     |       |       |       |          | 0 0     | SOMGT:0:12 0/1:G | T | 0 |
|       |    | 0.0 | 0.7 | 0.763 | 1.000 | 4.2   | 2.72     |         | SOMGT:0:13 0/1:C | T | 0 |
|       |    |     |     |       |       |       | 3.3      |         | SOMGT:0:41 0/1:C | T | 0 |
|       |    |     |     |       |       |       |          |         | SOMGT:0:9,0/1:C  | A | 0 |
|       |    |     |     |       |       |       |          | 0       | SOMGT:0:10 0/1:G | C | 0 |
|       |    |     |     |       |       |       |          | 0       | SOMGT:0:10 0/1:C | T | 0 |
|       | 0  | 0   |     |       |       |       |          | 0 0     | DB;G:0:55 0/1:G  | A | 0 |
|       |    |     |     |       |       |       | 1.95     | 0 0     | SOMGT:0:16 0/1:G | A | 0 |
|       |    |     |     |       |       |       |          |         | SOMGT:0:14 0/1:C | T | 0 |
|       |    |     |     |       |       |       |          |         | SOMGT:0:96 0/1:G | A | 0 |
|       |    |     |     |       |       |       | 1.31     |         | SOMGT:0:22 0/1:A | C | 0 |
|       |    |     |     |       |       |       |          |         | SOMGT:0:27 0/1:A | C | 0 |
|       |    |     |     |       |       |       |          |         | SOMGT:0:38 0/1:T | G | 0 |
|       |    | 0.1 | 0.6 | 0.936 | 1,D   | 5.6   | 5.16     |         | SOMGT:0:42 0/1:G | A | 0 |
| ##    | 0  | 0.0 | 0.9 | 0.991 | 1,D   | 5.8   | 5.70     |         | DB;G:0:26 0/1:G  | A | 0 |
|       |    |     |     |       |       |       | 1.41     |         | SOMGT:0:52 0/1:C | A | 0 |
|       | 0  | 0   | 0.1 | 0.5   | 0.981 | 0.999 | 4.2      | 3.28    | SOMGT:0:20 0/1:G | A | 0 |
|       |    |     |     |       |       |       |          |         | SOMGT:0:10 0/1:A | G | 0 |

|       |      |       |     |             |       |           |   |         |                      |   |   |
|-------|------|-------|-----|-------------|-------|-----------|---|---------|----------------------|---|---|
| .     | .    | .     | .   | .           | .     | .         | . | 0.      | SOMGT:0:51 0/1:xA    | G | 0 |
| .     | .    | .     | .   | .           | .     | .         | . | 0.      | SOMGT:0:8,(0/1:xC    | T | 0 |
| .     | .    | 0.2   | 0.0 | 0.002 1,N   | 2.2   | 1.28.     | . | .       | SOMGT:0:69 0/1:xC    | T | 0 |
| .     | .    | .     | .   | .           | .     | .         | . | .       | SOMGT:0:26 0/1:xA    | C | 0 |
| .     | .    | .     | .   | .           | .     | .         | . | 0.1 0.2 | SOMGT:0:13 0/1:zG    | A | 0 |
| .     | .    | .     | .   | .           | .     | .         | . | 0 0     | SOMGT:0:42 0/1:xC    | T | 0 |
| .     | ##   | 0 0.2 | 0.0 | 0.804 1,D   | 2.4   | 1.31.     | . | .       | SOMGT:0:17 0/1:zG    | A | 0 |
| .     | .    | .     | .   | .           | .     | .         | . | 0.1 0.2 | DB;SOMGT:0:19 0/1:xC | T | 0 |
| .     | .    | .     | .   | .           | .     | .         | . | .       | SOMGT:0:17 0/1:zG    | A | 0 |
| .     | .    | .     | .   | .           | .     | .         | . | .       | SOMGT:0:15 0/1:zA    | C | 0 |
| .     | .    | 0.0   | 0.9 | 1.0,D       | 0.917 | 3.2.      | . | .       | SOMGT:0:19 0/1:zG    | C | 0 |
| .     | .    | 0.0   | 0.9 | 0.99,1      | 0.866 | 3.5 3.17. | . | .       | SOMGT:0:75 0/1:xC    | A | 0 |
| .     | ##   | 0 0.0 | 0.4 | 0.99,1      | 0.995 | 3.7 2.54. | . | .       | SOMGT:0:77 0/1:xC    | T | 0 |
| .     | .    | .     | .   | .           | .     | .         | . | .       | SOMGT:0:30 0/1:zG    | A | 0 |
| .     | .    | .     | .   | .           | .     | .         | . | 0       | SOMGT:0:53 0/1:zT    | A | 0 |
| .     | .    | .     | .   | .           | .     | .         | . | .       | SOMGT:0:59 0/1:zT    | G | 0 |
| .     | .    | .     | .   | .           | .     | .         | . | .       | SOMGT:0:27 0/1:xC    | T | 0 |
| .     | .    | .     | .   | .           | .     | .         | . | .       | SOMGT:0:36 0/1:zC    | T | 0 |
| .     | .    | 0.0   | 0.9 | 1.0,D 1,D   | 5.6   | 5.94.     | . | .       | SOMGT:0:79 0/1:zG    | A | 0 |
| .     | .    | .     | .   | .           | .     | .         | . | 0.      | SOMGT:0:46 0/1:zT    | G | 0 |
| .     | .    | .     | .   | .           | .     | .         | . | 0.      | SOMGT:0:73 0/1:xC    | T | 0 |
| .     | .    | .     | .   | .           | .     | .         | . | 0.2 0.2 | SOMGT:0:9,(0/1:zG    | A | 0 |
| .     | .    | .     | .   | .           | .     | .         | . | .       | SOMGT:0:52 0/1:zC    | T | 0 |
| .     | .    | .     | .   | .           | .     | .         | . | .       | SOMGT:0:31 0/1:zG    | T | 0 |
| .     | .    | .     | .   | .           | .     | .         | . | .       | SOMGT:0:12 0/1:xA    | G | 0 |
| .     | .    | .     | .   | .           | .     | .         | . | 0 0     | SOMGT:0:9,(0/1:zC    | G | 0 |
| .     | .    | .     | .   | .           | .     | .         | . | .       | SOMGT:0:21 0/1:xC    | A | 0 |
| .     | .    | .     | .   | .           | .     | .         | . | 0 0     | SOMGT:0:23 0/1:zT    | C | 0 |
| .     | .    | .     | .   | .           | .     | .         | . | 0       | SOMGT:0:70 0/1:zC    | T | 0 |
| .     | .    | .     | .   | .           | .     | .         | . | 0       | SOMGT:0:85 0/1:xC    | T | 0 |
| .     | .    | .     | .   | .           | .     | .         | . | 0 0     | SOMGT:0:11 0/1:zG    | A | 0 |
| .     | .    | 0.0   | 0.0 | 0.006 1,D   | 6.1   | 4.63.     | . | .       | SOMGT:0:37 0/1:zG    | A | 0 |
| .     | .    | 0.0   | 0.6 | 0.989 0.994 | 3.7   | .         | . | .       | SOMGT:0:52 0/1:zC    | T | 0 |
| .     | .    | 0.0   | 1.0 | 1.0,D 1,D   | 5.3   | 5.07.     | . | .       | SOMGT:0:40 0/1:zC    | T | 0 |
| .     | .    | .     | .   | .           | .     | .         | . | .       | SOMGT:0:39 0/1:zG    | A | 0 |
| .     | .    | .     | .   | .           | .     | .         | . | 0.      | SOMGT:0:32 0/1:zC    | T | 0 |
| .     | .    | .     | .   | .           | .     | 1.34.     | . | .       | SOMGT:0:10 0/1:zA    | C | 0 |
| .     | .    | .     | .   | .           | .     | .         | . | .       | SOMGT:0:28 0/1:zG    | C | 0 |
| .     | .    | .     | .   | .           | .     | .         | . | .       | SOMGT:0:8,(0/1:zC    | T | 0 |
| .     | .    | .     | .   | .           | .     | .         | . | .       | SOMGT:0:53 0/1:zG    | C | 0 |
| .     | .    | .     | .   | .           | .     | .         | . | 0.      | SOMGT:0:19 0/1:zG    | A | 0 |
| .     | .    | .     | .   | .           | .     | .         | . | .       | SOMGT:0:90 0/1:zT    | A | 0 |
| .     | .    | .     | .   | .           | .     | .         | . | .       | SOMGT:0:10 0/1:zC    | G | 0 |
| .     | .    | .     | .   | .           | .     | 3.2 2.52. | . | .       | SOMGT:0:19 0/1:zC    | T | 0 |
| .     | .    | .     | .   | .           | .     | .         | . | 0.      | SOMGT:0:22 0/1:zG    | A | 0 |
| .     | .    | .     | .   | .           | .     | .         | . | 0 0     | SOMGT:0:12 0/1:zT    | C | 0 |
| .     | .    | .     | .   | .           | .     | .         | . | .       | SOMGT:0:46 0/1:zG    | A | 0 |
| .     | .    | .     | .   | .           | .     | .         | . | 0.      | SOMGT:0:37 0/1:zC    | T | 0 |
| .     | .    | .     | .   | .           | .     | .         | . | .       | SOMGT:0:37 0/1:zG    | A | 0 |
| .     | .    | .     | .   | .           | .     | .         | . | .       | SOMGT:0:94 0/1:zC    | T | 0 |
| .     | .    | .     | .   | .           | .     | .         | . | .       | SOMGT:0:15 0/1:zG    | A | 0 |
| .     | 0 0. | .     | .   | .           | .     | .         | . | 0.1 0   | DB;SOMGT:0:47 0/1:zC | T | 0 |
| .     | 0 0. | .     | .   | .           | .     | .         | . | 0.      | SOMGT:0:47 0/1:zT    | C | 0 |
| 0.367 | 0 0. | .     | .   | .           | .     | .         | . | 0 0.1   | SOMGT:0:23 0/1:zG    | C | 0 |

|   |       |     |     |       |       |       |      |                  |      |                  |   |   |
|---|-------|-----|-----|-------|-------|-------|------|------------------|------|------------------|---|---|
| . | .     | .   | .   | .     | .     | .     | .    | SOMGT:0:69 0/1:G | A    | 0                |   |   |
| . | .     | .   | .   | .     | .     | .     | .    | SOMGT:0:17 0/1:G | T    | 0                |   |   |
| . | .     | .   | .   | .     | .     | 0     | 0    | DB;GT:0:33 0/1:T | C    | 0                |   |   |
| . | ##    | 0   | .   | .     | .     | .     | .    | SOMGT:0:12 0/1:G | A    | 0                |   |   |
| . | .     | 0.0 | 0.9 | 1.0,D | 1,D   | 5.7   | 4.61 | SOMGT:0:78 0/1:G | A    | 0                |   |   |
| . | .     | .   | .   | .     | .     | .     | .    | SOMGT:0:21 0/1:G | A    | 0                |   |   |
| . | ##    | 0   | .   | .     | .     | .     | .    | SOMGT:0:62 0/1:G | A    | 0                |   |   |
| . | .     | .   | .   | .     | .     | 0     | .    | DB;GT:0:22 0/1:A | G    | 0                |   |   |
| . | .     | .   | .   | .     | .     | 0.3   | 0.2  | SOMGT:0:10 0/1:G | A    | 0                |   |   |
| . | .     | .   | .   | .     | .     | 2.9   | .    | SOMGT:0:27 0/1:G | A    | 0                |   |   |
| . | 2E-04 | ##  | 0   | 0.0   | 0.9   | 0.99  | 1,D  | 5.8              | 5.60 | SOMGT:0:58 0/1:G | A | 0 |
| . | .     | .   | .   | .     | .     | .     | .    | SOMGT:0:22 0/1:A | G    | 0                |   |   |
| . | 1     | 1   | .   | .     | .     | .     | .    | 0.1              | 0.5  | SOMGT:0:48 0/1:C | G | 0 |
| . | .     | .   | .   | .     | .     | .     | .    | .                | .    | SOMGT:0:19 0/1:G | A | 0 |
| . | .     | .   | .   | .     | .     | .     | .    | .                | .    | SOMGT:0:18 0/1:C | G | 0 |
| . | .     | .   | .   | .     | .     | .     | .    | .                | .    | SOMGT:0:12 0/1:C | T | 0 |
| . | .     | 0.3 | 0.0 | 0.04  | 1,D   | 5.2   | 2.12 | SOMGT:0:10 0/1:C | A    | 0                |   |   |
| . | .     | .   | .   | .     | .     | 1.70  | .    | SOMGT:0:39 0/1:G | T    | 0                |   |   |
| . | .     | .   | .   | .     | .     | .     | .    | .                | .    | SOMGT:0:12 0/1:C | T | 0 |
| . | .     | .   | .   | .     | .     | .     | .    | .                | .    | SOMGT:0:9,(0/1:A | T | 0 |
| . | 0     | 0   | .   | .     | .     | 2.1   | .    | SOMGT:0:12 0/1:T | C    | 0                |   |   |
| . | .     | .   | .   | .     | .     | .     | .    | .                | .    | SOMGT:0:11 0/1:C | A | 0 |
| . | .     | .   | .   | .     | .     | .     | .    | .                | .    | SOMGT:0:93 0/1:G | C | 0 |
| . | .     | .   | .   | .     | .     | 2.9   | .    | SOMGT:0:31 0/1:G | C    | 0                |   |   |
| . | .     | .   | .   | .     | .     | 0     | .    | SOMGT:0:16 0/1:C | A    | 0                |   |   |
| . | ##    | 0   | 0.0 | 0.3   | 0.517 | 1,D   | 5.7  | 4.40             | 0    | DB;GT:0:17 0/1:C | T | 0 |
| . | ##### | ##  | 0   | 0.4   | 0.0   | 0.375 | 0.51 | 4                | 2.41 | SOMGT:0:49 0/1:C | T | 0 |
| . | .     | 0   | 0   | .     | .     | .     | .    | .                | .    | DB;GT:0:11 0/1:T | C | 0 |
| . | .     | 0   | 0   | 0.1   | 0.0   | 0.075 | 1.00 | 1.87             | .    | SOMGT:0:45 0/1:C | T | 0 |
| . | .     | .   | .   | .     | .     | 1,A   | 3.73 | .                | .    | SOMGT:0:51 0/1:G | A | 0 |
| . | .     | .   | .   | .     | .     | .     | .    | 0                | 0    | SOMGT:0:37 0/1:G | A | 0 |
| . | .     | .   | .   | .     | .     | 2.6   | .    | .                | .    | SOMGT:0:15 0/1:C | A | 0 |
| . | .     | .   | .   | .     | .     | .     | .    | .                | .    | SOMGT:0:52 0/1:G | A | 0 |
| . | .     | .   | .   | .     | .     | 0.1   | 0.3  | SOMGT:0:8,(0/1:T | C    | 0                |   |   |
| . | ##    | 0   | 0.0 | 1.0   | 1.0,D | 1,D   | 5    | 4.51             | .    | SOMGT:0:84 0/1:G | A | 0 |
| . | .     | .   | .   | .     | .     | .     | .    | .                | .    | SOMGT:0:9,(0/1:C | T | 0 |
| . | .     | .   | .   | .     | .     | .     | .    | .                | .    | SOMGT:0:31 0/1:A | C | 0 |
| . | ##    | 0   | .   | .     | .     | 1,A   | 4.9  | 5.89             | .    | SOMGT:0:17 0/1:G | A | 0 |
| . | .     | 0.0 | 0.9 | 1.0,D | 1,D   | 6.2   | 4.86 | .                | .    | SOMGT:0:31 0/1:C | T | 0 |
| . | .     | .   | .   | .     | .     | .     | .    | .                | .    | SOMGT:0:83 0/1:C | T | 0 |
| . | .     | .   | .   | .     | .     | 0     | .    | .                | .    | SOMGT:0:33 0/1:T | G | 0 |
| . | .     | .   | .   | .     | .     | 0     | 0    | SOMGT:0:9,(0/1:G | A    | 0                |   |   |
| . | .     | .   | .   | .     | .     | 0     | .    | .                | .    | SOMGT:0:9,(0/1:C | T | 0 |
| . | .     | .   | .   | .     | .     | 0     | 0    | SOMGT:0:8,(0/1:T | G    | 0                |   |   |
| . | .     | .   | .   | .     | .     | .     | .    | .                | .    | SOMGT:0:10 0/1:T | C | 0 |
| . | .     | .   | .   | .     | .     | 0     | 0    | SOMGT:0:10 0/1:C | T    | 0                |   |   |
| . | .     | .   | .   | .     | .     | 3.49  | .    | .                | .    | SOMGT:0:43 0/1:G | T | 0 |
| . | ##    | 0   | .   | .     | .     | .     | .    | .                | .    | SOMGT:0:10 0/1:G | A | 0 |
| . | .     | .   | .   | .     | .     | 0     | .    | .                | .    | SOMGT:0:23 0/1:T | A | 0 |
| . | .     | .   | .   | .     | .     | 0     | 0.3  | DB;GT:0:44 0/1:G | A    | 0                |   |   |
| . | .     | .   | .   | .     | .     | 0     | 0    | SOMGT:0:8,(0/1:C | T    | 0                |   |   |
| . | .     | .   | .   | .     | .     | 0.2   | 0.2  | DB;GT:0:22 0/1:G | C    | 0                |   |   |
| . | .     | .   | .   | .     | .     | .     | .    | .                | .    | SOMGT:0:8,(0/1:G | T | 0 |
| . | .     | .   | .   | .     | .     | 0     | 0.1  | SOMGT:0:10 0/1:A | C    | 0                |   |   |



|  |      |                              |          |       |                   |   |   |
|--|------|------------------------------|----------|-------|-------------------|---|---|
|  |      |                              |          | 0 0   | SOMGT:0:10 0/1: C | G | 0 |
|  |      |                              |          | 0 0.1 | SOMGT:0:9,(0/1: A | G | 0 |
|  |      |                              |          | 0 0.2 | SOMGT:0:8,(0/1: G | A | 0 |
|  | 0 0  |                              |          | 0 0   | SOMGT:0:74 0/1: G | A | 0 |
|  |      |                              | 2.8 2.38 |       | SOMGT:0:22 0/1: G | A | 0 |
|  | ## 0 |                              |          |       | SOMGT:0:68 0/1: C | T | 0 |
|  |      |                              |          |       | SOMGT:0:20 0/1: C | T | 0 |
|  | 0 0  | 1.0,0.0,0.0,B 1.00C          |          | 0 0   | SOMGT:0:42 0/1: A | G | 0 |
|  |      |                              |          |       | SOMGT:0:9,(0/1: G | A | 0 |
|  |      | 0.5,0.0,0.0,B 1,N            |          |       | SOMGT:0:99 0/1: T | C | 0 |
|  |      |                              |          |       | SOMGT:0:18 0/1: A | T | 0 |
|  |      |                              |          |       | SOMGT:0:38 0/1: C | T | 0 |
|  |      |                              |          |       | SOMGT:0:15 0/1: G | A | 0 |
|  |      |                              |          | 0     | DB;GT:0:23 0/1: C | G | 0 |
|  |      |                              |          | 0     | DB;GT:0:25 0/1: C | T | 0 |
|  |      |                              |          |       | SOMGT:0:35 0/1: T | G | 0 |
|  |      |                              |          | 0     | DB;GT:0:42 0/1: G | A | 0 |
|  |      |                              |          | 0     | DB;GT:0:59 0/1: C | T | 0 |
|  |      |                              |          | 0     | DB;GT:0:65 0/1: T | A | 0 |
|  |      |                              |          | 0     | DB;GT:0:36 0/1: C | T | 0 |
|  |      |                              |          | 0     | DB;GT:0:35 0/1: G | C | 0 |
|  |      |                              |          |       | DB;GT:0:43 0/1: C | T | 0 |
|  |      |                              |          | 0     | SOMGT:0:8,(0/1: G | A | 0 |
|  |      |                              |          | 0     | DB;GT:0:22 0/1: T | C | 0 |
|  |      |                              |          |       | DB;GT:0:34 0/1: G | T | 0 |
|  |      |                              |          | 0     | DB;GT:0:38 0/1: A | G | 0 |
|  |      |                              |          | 0     | DB;GT:0:39 0/1: G | C | 0 |
|  |      |                              |          | 0 0   | SOMGT:0:8,(0/1: C | A | 0 |
|  |      |                              |          | 0     | SOMGT:0:22 0/1: A | G | 0 |
|  |      |                              |          |       | DB;GT:0:43 0/1: C | T | 0 |
|  |      |                              |          | 0     | DB;GT:0:43 0/1: C | T | 0 |
|  |      |                              |          |       | DB;GT:0:30 0/1: C | T | 0 |
|  |      |                              |          |       | SOMGT:0:14 0/1: A | T | 0 |
|  |      |                              |          |       | DB;GT:0:35 0/1: A | C | 0 |
|  |      |                              |          | 0     | DB;GT:0:27 0/1: A | C | 0 |
|  |      |                              |          | 0     | DB;GT:0:21 0/1: T | C | 0 |
|  |      |                              |          |       | SOMGT:0:33 0/1: C | A | 0 |
|  | 0 0  | 0.6,0.0,0.0,B 1,N            |          | 0 0   | SOMGT:0:79 0/1: A | G | 0 |
|  |      |                              |          | 0 0   | SOMGT:0:14 0/1: A | C | 0 |
|  |      | 0.1,0.0,0.0,B 1,N            | 1.72     |       | SOMGT:0:46 0/1: C | G | 0 |
|  |      |                              |          |       | SOMGT:0:35 0/1: C | A | 0 |
|  |      |                              |          |       | SOMGT:0:19 0/1: T | G | 0 |
|  |      |                              | 3.2      |       | SOMGT:0:58 0/1: G | A | 0 |
|  |      |                              |          |       | SOMGT:0:79 0/1: G | T | 0 |
|  |      |                              |          |       | SOMGT:0:14 0/1: G | A | 0 |
|  |      |                              |          | 0 0   | SOMGT:0:16 0/1: T | G | 0 |
|  |      |                              |          | 0 0.2 | SOMGT:0:11 0/1: A | G | 0 |
|  |      |                              |          | 0 0.2 | SOMGT:0:13 0/1: C | A | 0 |
|  |      | 0.1,0.458 1.00C 4.9 3.16     |          | 0     | SOMGT:0:25 0/1: C | T | 0 |
|  |      |                              |          |       | SOMGT:0:37 0/1: A | G | 0 |
|  |      |                              |          | 0 0   | DB;GT:0:29 0/1: A | T | 0 |
|  |      |                              |          |       | SOMGT:0:18 0/1: G | A | 0 |
|  |      |                              |          |       | SOMGT:0:33 0/1: G | A | 0 |
|  | ##   | 0.0,0.9,1.0,D 1.00C 3.4 4.41 |          |       | SOMGT:0:13 0/1: C | T | 0 |

|       |    |     |     |       |      |       |                     |                  |   |   |
|-------|----|-----|-----|-------|------|-------|---------------------|------------------|---|---|
| 0     | 0  |     |     | 2.5   |      |       | SOMGT:0:88 0/1:G    | A                | 0 |   |
|       |    |     |     |       |      |       | SOMGT:0:93 0/1:G    | A                | 0 |   |
|       |    |     |     |       |      |       | SOMGT:0:21 0/1:C    | T                | 0 |   |
|       |    |     |     | 4     |      |       | SOMGT:0:55 0/1:G    | A                | 0 |   |
|       |    |     |     | 1,N   |      |       | SOMGT:0:10 0/1:C    | T                | 0 |   |
| ##### | ## | 0   |     |       |      | 0     | SOMGT:0:87 0/1:C    | T                | 0 |   |
|       |    |     |     | 1.42  |      |       | SOMGT:0:14 0/1:C    | T                | 0 |   |
| 0     |    |     |     |       |      | 0     | SOMGT:0:17 0/1:C    | T                | 0 |   |
|       |    |     |     |       |      |       | SOMGT:0:32 0/1:G    | A                | 0 |   |
|       |    |     |     |       |      |       | SOMGT:0:65 0/1:G    | T                | 0 |   |
|       |    |     |     |       |      |       | SOMGT:0:11 0/1:G    | T                | 0 |   |
|       |    |     |     | 2.4   | 1.26 |       | SOMGT:0:10 0/1:C    | A                | 0 |   |
|       |    |     |     |       |      |       | SOMGT:0:11 0/1:G    | A                | 0 |   |
|       |    |     |     |       |      | 0 0.1 | SOMGT:0:8,0/1:T     | C                | 0 |   |
|       |    |     |     |       |      | 0 0   | SOMGT:0:26 0/1:G    | T                | 0 |   |
|       |    |     |     |       |      | 0     | SOMGT:0:38 0/1:C    | G                | 0 |   |
|       |    |     |     | 3.1   |      |       | SOMGT:0:24 0/1:C    | T                | 0 |   |
|       |    |     |     |       |      | 0     | SOMGT:0:22 0/1:A    | C                | 0 |   |
|       |    |     |     |       |      |       | SOMGT:0:19 0/1:C    | G                | 0 |   |
|       |    | 0.0 | 0.8 | 0.975 | 0.81 | 0     | DB;SOMGT:0:37 0/1:C | A                | 0 |   |
|       |    |     |     |       |      | 0     | DB;SOMGT:0:34 0/1:C | A                | 0 |   |
|       |    |     |     |       |      |       | SOMGT:0:17 0/1:A    | C                | 0 |   |
|       |    |     |     |       |      | 0 0   | SOMGT:0:11 0/1:T    | C                | 0 |   |
|       |    |     |     |       |      | 0     | SOMGT:0:85 0/1:T    | C                | 0 |   |
| ##    | 0  |     |     |       |      |       | SOMGT:0:75 0/1:G    | A                | 0 |   |
|       |    |     |     |       |      |       | SOMGT:0:39 0/1:G    | T                | 0 |   |
| ##    | 0  | 0.0 | 0.9 | 0.998 | 0.76 | 2.6   | 3.22                | SOMGT:0:17 0/1:T | G | 0 |
|       |    |     |     | 2.9   |      |       |                     | SOMGT:0:42 0/1:C | T | 0 |
|       |    |     |     |       |      |       |                     | SOMGT:0:17 0/1:C | T | 0 |
|       |    |     |     |       |      |       |                     | SOMGT:0:21 0/1:G | T | 0 |
|       |    |     |     |       |      |       |                     | SOMGT:0:87 0/1:C | A | 0 |
|       |    |     |     |       |      | 0     |                     | SOMGT:0:23 0/1:A | G | 0 |
|       |    |     |     |       |      |       |                     | SOMGT:0:41 0/1:C | A | 0 |
|       |    |     |     |       |      | 0.1   | 0.2                 | SOMGT:0:10 0/1:C | T | 0 |
|       |    |     |     |       |      | 0 0   |                     | SOMGT:0:41 0/1:C | T | 0 |
|       |    |     |     |       |      | 0     |                     | SOMGT:0:54 0/1:A | G | 0 |
|       |    |     |     |       |      |       |                     | SOMGT:0:9,0/1:G  | A | 0 |
|       |    |     |     |       |      |       |                     | SOMGT:0:29 0/1:C | T | 0 |
|       |    |     |     |       |      |       |                     | SOMGT:0:12 0/1:T | G | 0 |
|       |    |     |     |       |      |       |                     | SOMGT:0:56 0/1:C | T | 0 |
|       |    |     |     |       |      |       |                     | SOMGT:0:20 0/1:C | T | 0 |
| 0     | 0  |     |     |       |      | 0 0   |                     | SOMGT:0:18 0/1:G | A | 0 |
|       |    |     |     |       |      | 0 0   |                     | SOMGT:0:22 0/1:C | T | 0 |
| ##### | ## | 0   |     |       |      |       |                     | SOMGT:0:63 0/1:C | T | 0 |
|       |    |     |     | 3.5   |      |       |                     | SOMGT:0:56 0/1:G | A | 0 |
|       |    |     |     | 2.38  |      |       |                     | SOMGT:0:25 0/1:G | A | 0 |
|       |    |     |     |       |      |       |                     | SOMGT:0:26 0/1:C | A | 0 |
|       |    |     |     |       |      | 0 0.1 |                     | SOMGT:0:31 0/1:G | T | 0 |
|       |    |     |     |       |      |       |                     | SOMGT:0:11 0/1:T | C | 0 |
|       |    | 0.0 | 0.7 | 0.898 | 0.97 | 5     | 3.18                | SOMGT:0:11 0/1:C | T | 0 |
| ##    | 0  | 0.0 | 0.8 | 0.998 | 1,D  | 5.1   | 3.90                | SOMGT:0:48 0/1:C | T | 0 |
|       |    |     |     | 2.6   |      |       |                     | SOMGT:0:93 0/1:G | A | 0 |
| 0     | 0  | 0.0 | 0.9 | 1.0,D | 1,D  | 4.9   | 3.75                | SOMGT:0:43 0/1:G | A | 0 |
|       |    |     |     |       |      |       |                     | SOMGT:0:26 0/1:G | C | 0 |

|       |    |         |               |       |      |      |                          |   |   |
|-------|----|---------|---------------|-------|------|------|--------------------------|---|---|
|       |    |         |               |       | 0    |      | SOMGT:0:13 0/1:4 T       | C | 0 |
|       |    |         |               |       | 0    |      | SOMGT:0:13 0/1:4 A       | G | 0 |
| 0.003 |    |         |               |       | 0    | 0    | DB;5 GT:0:60 0/1:4 A     | T | 0 |
|       |    | 0.0,0.4 | 0.9740.935    | 4.8   |      |      | SOMGT:0:71 0/1:4 G       | A | 0 |
|       |    | 0.4     | 0.0!0.0,B     | 1.00C |      |      | SOMGT:0:89 0/1:4 T       | C | 0 |
|       |    |         |               |       |      |      | SOMGT:0:65 0/1:4 C       | T | 0 |
|       |    |         |               |       |      |      | SOMGT:0:17 0/1:4 C       | A | 0 |
|       |    |         |               |       |      |      | SOMGT:0:20 0/1:4 G       | A | 0 |
|       | 0  | 0       |               |       | 3.39 |      | SOMGT:0:17 0/1:4 G       | A | 0 |
|       |    |         |               |       |      |      | SOMGT:0:26 0/1:4 T       | C | 0 |
|       |    |         |               |       |      |      | SOMGT:0:29 0/1:4 G       | A | 0 |
|       |    |         |               |       |      |      | SOMGT:0:22 0/1:4 C       | A | 0 |
|       | ## | 0       |               |       |      |      | SOMGT:0:95 0/1:4 C       | T | 0 |
|       |    |         |               |       |      |      | SOMGT:0:40 0/1:4 C       | G | 0 |
| 3E-04 | 0  | 0       | 0.8!0.0!0.877 | 0.994 | 4.2  | 2.67 | SOMGT:0:92 0/1:4 C       | T | 0 |
|       |    |         | 0.0,0.3!0.273 | 1,D   | 5.4  | 4.81 | SOMGT:0:14 0/1:4 C       | T | 0 |
|       | 0  | 0       |               |       |      |      | SOMGT:0:17 0/1:4 G       | A | 0 |
|       |    |         |               |       |      |      | 0 0.4 SOMGT:0:8,(0/1:4 G | C | 0 |
|       |    |         |               |       |      |      | SOMGT:0:31 0/1:4 T       | A | 0 |
|       |    |         |               |       |      |      | 0 0 SOMGT:0:8,(0/1:4 C   | T | 0 |
|       |    |         | 0.0,0.0!0.103 | 1,N   | 3    | 2.65 | SOMGT:0:40 0/1:4 G       | C | 0 |
|       |    |         |               |       |      |      | SOMGT:0:13 0/1:4 C       | T | 0 |
| 9E-04 | 0  | 0       | 0.2!0.0!0.055 | 1,D   | 5    | 3.03 | 0 0 SOMGT:0:46 0/1:4 G   | A | 0 |
|       |    |         |               |       |      |      | SOMGT:0:13 0/1:4 G       | A | 0 |
|       |    |         |               |       | 2.3  | 1.84 | SOMGT:0:86 0/1:4 G       | A | 0 |
|       | ## | 0       | 0.0!0.0!0.002 | 1,D   | 3.2  | 2.14 | SOMGT:0:93 0/1:4 G       | A | 0 |
|       |    |         | 0.0!0.1!0.236 | 1.00C | 6.2  | 2.89 | SOMGT:0:39 0/1:4 C       | T | 0 |
|       |    |         | 0.0!0.9!1.0,D | 1,D   | 5.9  | 5.31 | SOMGT:0:30 0/1:4 G       | C | 0 |
|       |    |         |               |       | 2.3  | 2.51 | SOMGT:0:37 0/1:4 G       | T | 0 |
|       |    |         |               |       |      |      | SOMGT:0:25 0/1:4 G       | T | 0 |
|       |    |         |               |       |      |      | SOMGT:0:12 0/1:4 G       | C | 0 |
|       |    |         |               |       |      |      | 0 SOMGT:0:18 0/1:4 A     | G | 0 |
|       | ## | 0       | 0.0`0.0!0.029 | 1,N   | 1.80 |      | SOMGT:0:23 0/1:4 C       | T | 0 |
|       |    |         |               |       |      |      | 0 0.1 SOMGT:0:8,(0/1:4 C | A | 0 |
|       |    |         |               |       | 2.2  | 1.31 | SOMGT:0:41 0/1:4 C       | T | 0 |
|       |    |         |               |       |      |      | SOMGT:0:28 0/1:4 C       | G | 0 |
|       |    |         |               |       |      |      | SOMGT:0:20 0/1:4 G       | A | 0 |
|       |    |         |               |       |      |      | SOMGT:0:10 0/1:4 G       | A | 0 |
|       |    |         |               |       |      |      | SOMGT:0:11 0/1:4 G       | A | 0 |
|       |    |         |               |       |      |      | SOMGT:0:8,(0/1:4 C       | A | 0 |
|       |    |         |               |       |      |      | SOMGT:0:31 0/1:4 G       | A | 0 |
|       |    |         |               |       | 1.48 |      | SOMGT:0:56 0/1:4 G       | A | 0 |
|       |    |         |               |       |      |      | SOMGT:0:10 0/1:4 G       | A | 0 |
|       | 0  | 0       |               |       |      |      | 0 0.3 SOMGT:0:11 0/1:4 G | A | 0 |
|       |    |         |               |       |      |      | 0 0 SOMGT:0:12 0/1:4 C   | T | 0 |
|       |    |         |               |       |      |      | SOMGT:0:9,(0/1:4 C       | T | 0 |
|       |    |         |               |       |      |      | 0 0 SOMGT:0:13 0/1:4 G   | A | 0 |
|       |    |         |               |       |      |      | 0 0 SOMGT:0:41 0/1:4 A   | G | 0 |
|       |    |         |               |       |      |      | 0 0.1 SOMGT:0:20 0/1:4 C | G | 0 |
|       |    |         |               |       |      |      | 0 DB;5 GT:0:52 0/1:4 A   | T | 0 |
|       |    |         |               |       |      |      | SOMGT:0:68 0/1:4 T       | G | 0 |
|       |    |         |               |       |      |      | SOMGT:0:9,(0/1:4 A       | G | 0 |
|       |    |         |               |       |      |      | SOMGT:0:8,(0/1:4 G       | A | 0 |
|       |    |         |               |       |      |      | SOMGT:0:19 0/1:4 C       | A | 0 |

|       |    |   |                     |     |       |    |                   |         |                  |   |   |
|-------|----|---|---------------------|-----|-------|----|-------------------|---------|------------------|---|---|
| .     | .  | . | .                   | .   | .     | .  | .                 | 0.      | DB;GT:0:27 0/1:C | T | 0 |
| .     | .  | . | .                   | .   | .     | .  | .                 | .       | SOMGT:0:16 0/1:T | G | 0 |
| .     | .  | . | .                   | .   | .     | .  | .                 | .       | SOMGT:0:18 0/1:C | G | 0 |
| .     | .  | . | .                   | .   | .     | .  | .                 | 0 0     | SOMGT:0:12 0/1:G | A | 0 |
| .     | .  | . | .                   | .   | .     | .  | .                 | 0 0     | SOMGT:0:12 0/1:G | A | 0 |
| .     | .  | . | .                   | .   | .     | .  | 1.97              | 0 0     | SOMGT:0:11 0/1:G | C | 0 |
| .     | .  | . | .                   | .   | .     | .  | .                 | .       | SOMGT:0:9,(0/1:G | A | 0 |
| .     | .  | . | .                   | .   | .     | .  | .                 | 0 0.2   | SOMGT:0:24 0/1:C | T | 0 |
| .     | .  | . | .                   | .   | .     | .  | .                 | 0.      | SOMGT:0:14 0/1:T | A | 0 |
| .     | .  | . | .                   | .   | .     | .  | 1.76.             | .       | SOMGT:0:18 0/1:C | T | 0 |
| .     | .  | . | .                   | .   | .     | .  | .                 | .       | SOMGT:0:62 0/1:C | G | 0 |
| .     | .  | . | .                   | .   | .     | .  | .                 | .       | SOMGT:0:31 0/1:C | A | 0 |
| .     | .  | . | .                   | .   | .     | .  | .                 | .       | SOMGT:0:69 0/1:A | T | 0 |
| .     | .  | . | .                   | .   | .     | .  | .                 | .       | SOMGT:0:19 0/1:G | T | 0 |
| .     | .  | . | .                   | .   | .     | .  | 3.3 1.34.         | .       | SOMGT:0:51 0/1:G | T | 0 |
| .     | .  | . | .                   | .   | .     | .  | 2.8 1.23.         | .       | SOMGT:0:85 0/1:C | T | 0 |
| .     | .  | . | .                   | .   | .     | .  | 2.                | .       | SOMGT:0:42 0/1:C | T | 0 |
| .     | .  | . | .                   | .   | .     | .  | 0.3 0.0 0.11, 1,N | .       | SOMGT:0:58 0/1:G | G | 0 |
| 5E-04 | 0  | 0 | .                   | .   | .     | .  | .                 | .       | SOMGT:0:12 0/1:G | A | 0 |
| ##### | 0  | 0 | 0.0 0.3 0.988 1.000 | 5.6 | 3.54. | .  | .                 | .       | SOMGT:0:52 0/1:G | A | 0 |
| .     | .  | . | 0.1 0.5 0.994 0.999 | 2.6 | 3.80. | .  | .                 | .       | SOMGT:0:25 0/1:G | A | 0 |
| .     | .  | . | 0.0,1.0,1.0,D 1,D   | 5.7 | 5.03  | 0. | .                 | .       | SOMGT:0:75 0/1:C | T | 0 |
| .     | .  | . | .                   | .   | .     | .  | .                 | .       | SOMGT:0:13 0/1:G | A | 0 |
| .     | ## | 0 | .                   | .   | .     | .  | .                 | .       | SOMGT:0:38 0/1:G | A | 0 |
| .     | .  | . | .                   | .   | .     | .  | 1.87.             | .       | SOMGT:0:28 0/1:C | T | 0 |
| .     | .  | . | .                   | .   | .     | .  | .                 | .       | SOMGT:0:9,(0/1:C | G | 0 |
| .     | .  | . | .                   | .   | .     | .  | 3.4.              | .       | DB;GT:0:40 0/1:G | C | 0 |
| .     | .  | . | .                   | .   | .     | .  | .                 | .       | SOMGT:0:31 0/1:G | C | 0 |
| .     | .  | . | .                   | .   | .     | .  | .                 | 0.      | SOMGT:0:9,(0/1:C | A | 0 |
| .     | .  | . | .                   | .   | .     | .  | 4.1.              | .       | SOMGT:0:69 0/1:C | T | 0 |
| .     | .  | . | .                   | .   | .     | .  | 3.9.              | .       | SOMGT:0:13 0/1:C | T | 0 |
| .     | .  | . | .                   | .   | .     | .  | .                 | .       | SOMGT:0:36 0/1:A | G | 0 |
| .     | .  | . | .                   | .   | .     | .  | 1.61.             | .       | SOMGT:0:17 0/1:C | G | 0 |
| .     | .  | . | .                   | .   | .     | .  | .                 | .       | SOMGT:0:12 0/1:C | G | 0 |
| .     | .  | . | .                   | .   | .     | .  | .                 | 0.      | SOMGT:0:27 0/1:C | T | 0 |
| .     | .  | . | .                   | .   | .     | .  | 2.6.              | 0       | SOMGT:0:31 0/1:C | T | 0 |
| ##### | ## | 0 | .                   | .   | .     | .  | .                 | .       | SOMGT:0:59 0/1:C | T | 0 |
| .     | .  | . | .                   | .   | .     | .  | .                 | .       | SOMGT:0:77 0/1:C | T | 0 |
| .     | .  | . | .                   | .   | .     | .  | 1.57.             | .       | SOMGT:0:39 0/1:G | A | 0 |
| .     | .  | . | .                   | .   | .     | .  | .                 | 0.      | SOMGT:0:17 0/1:A | G | 0 |
| .     | .  | . | .                   | .   | .     | .  | .                 | 0.      | SOMGT:0:18 0/1:C | A | 0 |
| .     | .  | . | .                   | .   | .     | .  | 1.90.             | .       | SOMGT:0:27 0/1:C | T | 0 |
| .     | .  | . | .                   | .   | .     | .  | .                 | 0.1 0.5 | SOMGT:0:8,(0/1:G | A | 0 |
| .     | .  | . | .                   | .   | .     | .  | .                 | 0 0.1   | SOMGT:0:8,(0/1:T | C | 0 |
| .     | .  | . | .                   | .   | .     | .  | 3.8 1.39.         | .       | SOMGT:0:90 0/1:C | T | 0 |
| .     | .  | . | .                   | .   | .     | .  | .                 | .       | SOMGT:0:29 0/1:G | A | 0 |
| .     | .  | . | .                   | .   | .     | .  | 1.92.             | .       | SOMGT:0:31 0/1:G | C | 0 |
| .     | .  | . | .                   | .   | .     | .  | .                 | 0 0     | DB;GT:0:28 0/1:A | T | 0 |
| .     | .  | . | .                   | .   | .     | .  | 5.4 3.63.         | .       | SOMGT:0:10 0/1:C | T | 0 |
| .     | .  | . | .                   | .   | .     | .  | .                 | .       | SOMGT:0:16 0/1:C | T | 0 |
| .     | 1  | 1 | .                   | .   | .     | .  | .                 | 0 0     | SOMGT:0:17 0/1:T | C | 0 |
| .     | .  | . | .                   | .   | .     | .  | .                 | 0.      | SOMGT:0:9,(0/1:A | G | 0 |
| .     | .  | . | .                   | .   | .     | .  | .                 | .       | SOMGT:0:18 0/1:C | T | 0 |
| .     | .  | . | .                   | .   | .     | .  | .                 | .       | SOMGT:0:17 0/1:G | T | 0 |

|       |    |     |     |                 |     |      |     |      |                    |   |   |
|-------|----|-----|-----|-----------------|-----|------|-----|------|--------------------|---|---|
| .     | .  | .   | .   | .               | .   | .    | .   | .    | SOMGT:0:22 0/1:4 G | C | 0 |
| .     | .  | .   | .   | .               | .   | .    | .   | .    | SOMGT:0:14 0/1:2 T | G | 0 |
| .     | .  | 0.1 | 0.1 | 0.2910.943      | 2.4 | 2.90 | .   | .    | SOMGT:0:37 0/1:6 C | T | 0 |
| .     | .  | .   | .   | .               | .   | .    | .   | .    | SOMGT:0:15 0/1:1 T | G | 0 |
| .     | .  | .   | .   | .               | .   | .    | .   | .    | SOMGT:0:9,(0/1:1 T | C | 0 |
| .     | .  | .   | .   | .               | .   | .    | .   | .    | SOMGT:0:33 0/1:4 C | T | 0 |
| .     | .  | 0.3 | 0.0 | 0.118 1,N       | .   | .    | .   | .    | SOMGT:0:26 0/1:4 G | A | 0 |
| .     | .  | .   | .   | .               | .   | .    | .   | .    | SOMGT:0:13 0/1:2 G | A | 0 |
| .     | .  | .   | .   | .               | .   | .    | .   | .    | SOMGT:0:25 0/1:2 C | T | 0 |
| .     | .  | .   | .   | .               | .   | .    | .   | .    | SOMGT:0:67 0/1:1 G | A | 0 |
| .     | .  | .   | .   | .               | .   | .    | .   | .    | SOMGT:0:45 0/1:8 G | A | 0 |
| .     | .  | .   | .   | .               | .   | .    | .   | .    | SOMGT:0:16 0/1:2 G | A | 0 |
| .     | .  | .   | .   | .               | .   | .    | .   | .    | SOMGT:0:10 0/1:1 G | T | 0 |
| .     | .  | 0.0 | 0.1 | 0.146 1,D       | 5.5 | 4.87 | .   | .    | SOMGT:0:37 0/1:4 C | G | 0 |
| .     | .  | .   | .   | .               | .   | .    | .   | .    | SOMGT:0:55 0/1:9 C | T | 0 |
| .     | .  | .   | .   | .               | .   | .    | .   | .    | SOMGT:0:15 0/1:2 G | A | 0 |
| .     | .  | .   | .   | .               | 4.6 | 2.01 | .   | .    | SOMGT:0:98 0/1:1 C | T | 0 |
| .     | .  | 0.1 | 0.3 | 0.722 1,D       | 5.4 | 4.72 | .   | .    | SOMGT:0:10 0/1:1 C | T | 0 |
| .     | .  | .   | .   | .               | .   | .    | .   | .    | SOMGT:0:16 0/1:2 G | A | 0 |
| .     | ## | .   | .   | .               | .   | 1.27 | 0   | .    | SOMGT:0:17 0/1:2 C | T | 0 |
| ##### | .  | 0.1 | 0.6 | 0.939 1.000     | 5.4 | 4.66 | .   | .    | SOMGT:0:10 0/1:1 G | A | 0 |
| .     | ## | 0   | .   | .               | .   | .    | .   | .    | SOMGT:0:52 0/1:1 G | A | 0 |
| .     | .  | .   | .   | .               | .   | .    | .   | .    | SOMGT:0:33 0/1:5 A | T | 0 |
| 0.001 | 0  | 0   | .   | .               | .   | 3.1  | .   | .    | SOMGT:0:17 0/1:2 G | A | 0 |
| .     | .  | 0.1 | 0.0 | 0.011 1,N       | .   | .    | .   | .    | SOMGT:0:79 0/1:2 C | T | 0 |
| .     | .  | 0.1 | 0.2 | 0.437 1,N       | 3.6 | 3.56 | .   | .    | SOMGT:0:68 0/1:2 C | G | 0 |
| .     | .  | .   | .   | .               | .   | .    | .   | .    | SOMGT:0:43 0/1:1 C | T | 0 |
| .     | .  | 0.0 | 0.9 | 0.999 1.000     | 3.5 | 3.61 | .   | .    | SOMGT:0:11 0/1:2 C | T | 0 |
| .     | .  | .   | .   | .               | .   | .    | .   | .    | SOMGT:0:21 0/1:6 C | T | 0 |
| .     | .  | 0.1 | 0.5 | 0.873 1,N       | 4.2 | 1.92 | .   | .    | SOMGT:0:68 0/1:2 C | T | 0 |
| .     | .  | .   | .   | .               | .   | .    | .   | .    | SOMGT:0:41 0/1:1 C | T | 0 |
| .     | .  | .   | .   | .               | .   | 2.9  | .   | .    | SOMGT:0:71 0/1:2 G | A | 0 |
| .     | .  | .   | .   | .               | .   | .    | .   | .    | SOMGT:0:32 0/1:1 C | T | 0 |
| 0.004 | 0  | 0   | .   | .               | .   | .    | .   | .    | SOMGT:0:26 0/1:6 G | A | 0 |
| .     | .  | .   | .   | 1,D             | 3.4 | 8.37 | .   | .    | SOMGT:0:59 0/1:1 C | A | 0 |
| .     | .  | .   | .   | .               | .   | .    | .   | .    | SOMGT:0:11 0/1:2 G | A | 0 |
| .     | .  | .   | .   | .               | .   | .    | .   | .    | SOMGT:0:13 0/1:4 T | G | 0 |
| .     | .  | .   | .   | .               | .   | 2.8  | .   | .    | SOMGT:0:9,(0/1:2 G | C | 0 |
| .     | .  | .   | .   | .               | .   | 2.10 | .   | .    | SOMGT:0:18 0/1:4 C | T | 0 |
| .     | .  | .   | .   | .               | .   | .    | .   | .    | SOMGT:0:25 0/1:7 G | A | 0 |
| .     | .  | .   | .   | .               | .   | .    | .   | .    | SOMGT:0:40 0/1:1 G | C | 0 |
| .     | .  | .   | .   | .               | .   | 5.6  | .   | .    | SOMGT:0:70 0/1:2 C | T | 0 |
| .     | .  | 0.4 | 1.0 | 1.0,D 1,N       | .   | .    | .   | .    | SOMGT:0:93 0/1:1 C | G | 0 |
| .     | .  | .   | .   | .               | .   | .    | .   | .    | SOMGT:0:22 0/1:6 G | A | 0 |
| .     | .  | .   | .   | .               | .   | .    | .   | .    | SOMGT:0:24 0/1:4 G | A | 0 |
| .     | .  | .   | .   | .               | .   | .    | .   | .    | SOMGT:0:8,(0/1:1 C | T | 0 |
| .     | .  | .   | .   | .               | .   | .    | 0   | .    | SOMGT:0:17 0/1:5 C | T | 0 |
| .     | .  | .   | .   | .               | .   | .    | 0   | 0    | SOMGT:0:10 0/1:2 C | T | 0 |
| .     | .  | .   | .   | .               | .   | .    | 0   | 0    | SOMGT:0:11 0/1:2 G | A | 0 |
| .     | .  | .   | .   | .               | .   | .    | 0   | 0    | SOMGT:0:14 0/1:4 C | T | 0 |
| .     | .  | .   | .   | .               | .   | 0.4  | 0.4 | DB;S | GT:0:41 0/1:7 C    | T | 0 |
| .     | 0  | 0   | .   | .               | .   | 2.1  | .   | .    | SOMGT:0:84 0/1:1 C | T | 0 |
| .     | ## | 0   | 0.0 | 0.0,0.0,B 1.000 | 3   | 2.06 | 0   | .    | SOMGT:0:42 0/1:7 G | A | 0 |
| .     | .  | .   | .   | .               | .   | .    | .   | .    | SOMGT:0:10 0/1:2 G | A | 0 |

|    |     |     |             |                  |                  |   |   |
|----|-----|-----|-------------|------------------|------------------|---|---|
|    |     |     | 4 1.61      | SOMGT:0:21 0/1:G | A                | 0 |   |
|    | 0.0 | 0.9 | 0.99,1,D    | 5.6 4.79         | SOMGT:0:57 0/1:C | G | 0 |
|    |     |     |             | 0 0 DB;G         | 0:20 0/1:G       | T | 0 |
|    |     |     |             |                  | SOMGT:0:19 0/1:G | A | 0 |
|    |     |     |             |                  | SOMGT:0:38 0/1:C | T | 0 |
|    |     |     |             |                  | SOMGT:0:14 0/1:G | C | 0 |
|    |     |     |             | 0 0.1            | SOMGT:0:9,(0/1:G | A | 0 |
|    |     |     |             |                  | SOMGT:0:18 0/1:C | T | 0 |
|    |     |     |             |                  | SOMGT:0:28 0/1:G | A | 0 |
|    |     |     | 1.30        | 0 0              | SOMGT:0:9,(0/1:A | T | 0 |
|    | 0.0 | 1.0 | 1.0,D 1,D   | 4.7 4.00         | SOMGT:0:17 0/1:G | C | 0 |
|    |     |     |             | 0                | SOMGT:0:11 0/1:A | G | 0 |
|    |     |     | 3.1         |                  | SOMGT:0:26 0/1:T | G | 0 |
|    |     |     |             |                  | SOMGT:0:10 0/1:T | C | 0 |
|    |     |     |             | 0 0              | SOMGT:0:10 0/1:G | C | 0 |
|    | 0.5 | 0.0 | 0.0011,D    | 5.8              | SOMGT:0:17 0/1:G | A | 0 |
|    |     |     |             |                  | SOMGT:0:10 0/1:C | T | 0 |
|    |     |     |             |                  | SOMGT:0:14 0/1:G | A | 0 |
|    |     |     |             |                  | SOMGT:0:14 0/1:A | C | 0 |
|    |     |     |             |                  | SOMGT:0:14 0/1:G | A | 0 |
|    |     |     | 2.5         |                  | SOMGT:0:11 0/1:T | A | 0 |
|    |     |     |             |                  | SOMGT:0:11 0/1:C | T | 0 |
|    |     |     |             |                  | SOMGT:0:29 0/1:G | C | 0 |
|    |     |     |             | 0 0              | SOMGT:0:22 0/1:C | T | 0 |
|    |     |     |             |                  | SOMGT:0:26 0/1:C | T | 0 |
|    |     |     | 1,A         | 7.72             | SOMGT:0:37 0/1:C | T | 0 |
|    | 0.0 | 0.9 | 1.0,D 1,D   | 5.8 5.12         | SOMGT:0:69 0/1:C | T | 0 |
|    |     |     | 2.1 1.99    |                  | SOMGT:0:35 0/1:C | A | 0 |
|    |     |     | 2.08        |                  | SOMGT:0:12 0/1:C | A | 0 |
|    |     |     |             |                  | SOMGT:0:40 0/1:A | C | 0 |
|    |     |     |             |                  | SOMGT:0:24 0/1:C | T | 0 |
|    |     |     |             |                  | SOMGT:0:10 0/1:G | C | 0 |
|    |     |     |             |                  | SOMGT:0:31 0/1:G | A | 0 |
|    |     |     | 1.83        | 0                | SOMGT:0:12 0/1:G | A | 0 |
|    |     |     | 3.63        |                  | SOMGT:0:83 0/1:C | T | 0 |
|    |     |     | 3.2         |                  | SOMGT:0:13 0/1:G | C | 0 |
| ## | 0.4 | 0.4 | 0.98E 1.00C | 5.9 2.50         | SOMGT:0:31 0/1:C | G | 0 |
|    |     |     |             |                  | SOMGT:0:12 0/1:C | G | 0 |
|    | 0.0 | 0.0 | 0.08E 0.994 | 5.6 2.43         | SOMGT:0:68 0/1:C | G | 0 |
| ## | 0   |     |             | 5.2 1.69         | SOMGT:0:24 0/1:G | A | 0 |
|    | 0.2 | 0.0 | 0.017 1,N   |                  | SOMGT:0:76 0/1:C | T | 0 |
|    | 0.0 | 0.1 | 0.35E 1,N   |                  | SOMGT:0:92 0/1:C | G | 0 |
|    |     |     |             |                  | SOMGT:0:12 0/1:C | T | 0 |
|    |     |     | 4           |                  | SOMGT:0:49 0/1:G | C | 0 |
|    |     |     |             |                  | SOMGT:0:15 0/1:G | C | 0 |
|    |     |     |             |                  | SOMGT:0:34 0/1:G | A | 0 |
|    |     |     |             |                  | SOMGT:0:15 0/1:G | A | 0 |
|    |     |     |             |                  | SOMGT:0:12 0/1:G | A | 0 |
|    | 0.0 | 0.7 | 0.98E 1.00C | 3.8 3.27         | SOMGT:0:97 0/1:C | T | 0 |
| 0  | 0   |     |             |                  | SOMGT:0:59 0/1:C | T | 0 |
|    |     |     | 2.4 1.28    |                  | SOMGT:0:18 0/1:C | T | 0 |
|    |     |     |             |                  | SOMGT:0:13 0/1:C | T | 0 |
|    |     |     |             |                  | SOMGT:0:37 0/1:C | A | 0 |
|    |     |     |             |                  | SOMGT:0:24 0/1:T | G | 0 |

|       |    |   |     |     |       |         |          |                    |                     |   |   |
|-------|----|---|-----|-----|-------|---------|----------|--------------------|---------------------|---|---|
| ##### | .  | . | .   | .   | .     | 4.09    | 0.       | SOMGT:0:13 0/1:2 A | C                   | 0 |   |
| .     | ## | 0 | 0.0 | 0.8 | 0.997 | 1.000   | 5.4 3.50 | 0.                 | SOMGT:0:14 0/1:2 C  | T | 0 |
| 0.002 | 0  | 0 | 0.0 | 0.0 | 0.0   | B 1,N   | .        | .                  | SOMGT:0:42 0/1:7 G  | A | 0 |
| .     | .  | . | .   | .   | .     | .       | .        | .                  | SOMGT:0:48 0/1:2 C  | G | 0 |
| .     | .  | . | .   | .   | .     | .       | .        | .                  | SOMGT:0:15 0/1:2 C  | T | 0 |
| .     | ## | 0 | .   | .   | .     | .       | 1.60     | .                  | SOMGT:0:21 0/1:2 C  | T | 0 |
| .     | .  | . | 0.0 | 0.9 | 1.0   | D 1.000 | 6.2 5.48 | .                  | SOMGT:0:70 0/1:2 C  | T | 0 |
| .     | .  | . | .   | .   | .     | .       | .        | .                  | SOMGT:0:8,0 0/1:7 G | A | 0 |
| .     | .  | . | .   | .   | .     | .       | .        | .                  | SOMGT:0:98 0/1:2 G  | C | 0 |
| 2E-04 | ## | 0 | .   | .   | .     | .       | .        | .                  | SOMGT:0:57 0/1:2 G  | A | 0 |
| .     | .  | . | .   | .   | .     | .       | .        | .                  | SOMGT:0:59 0/1:2 C  | T | 0 |
| .     | .  | . | .   | .   | .     | .       | .        | .                  | SOMGT:0:26 0/1:2 G  | T | 0 |
| .     | .  | . | .   | .   | .     | .       | .        | .                  | SOMGT:0:14 0/1:2 C  | T | 0 |
| 3E-04 | 0  | 0 | .   | .   | .     | .       | .        | 0.                 | SOMGT:0:50 0/1:2 C  | T | 0 |
| .     | .  | . | .   | .   | .     | .       | .        | .                  | SOMGT:0:21 0/1:2 G  | A | 0 |
| .     | .  | . | .   | .   | .     | .       | .        | .                  | SOMGT:0:69 0/1:2 C  | G | 0 |
| .     | .  | . | .   | .   | .     | .       | .        | .                  | SOMGT:0:24 0/1:2 A  | T | 0 |
| .     | .  | . | .   | .   | .     | .       | .        | .                  | SOMGT:0:25 0/1:2 T  | C | 0 |
| .     | .  | . | .   | .   | .     | .       | .        | 0 0                | SOMGT:0:10 0/1:2 T  | C | 0 |
| .     | .  | . | .   | .   | .     | .       | .        | 0.1 0.4            | SOMGT:0:8,0 0/1:2 C | T | 0 |
| .     | .  | . | .   | .   | .     | .       | .        | .                  | SOMGT:0:34 0/1:2 C  | A | 0 |
| .     | .  | . | .   | .   | .     | .       | .        | 0.                 | SOMGT:0:20 0/1:2 G  | C | 0 |
| .     | ## | 0 | .   | .   | .     | .       | 2.1      | 0.                 | SOMGT:0:11 0/1:2 T  | C | 0 |
| .     | .  | . | .   | .   | .     | .       | .        | 0.                 | SOMGT:0:12 0/1:2 A  | C | 0 |
| .     | .  | . | 0.1 | .   | 0.519 | 2.6     | .        | .                  | SOMGT:0:68 0/1:2 G  | T | 0 |
| .     | .  | . | .   | .   | .     | .       | .        | 0 0                | SOMGT:0:13 0/1:2 A  | G | 0 |
| ##### | 0  | 0 | .   | .   | .     | .       | .        | .                  | SOMGT:0:14 0/1:2 G  | A | 0 |
| .     | ## | 0 | 0.0 | 0.7 | 0.974 | 0.777   | 4.5 4.43 | .                  | SOMGT:0:75 0/1:2 G  | A | 0 |
| .     | .  | . | 0.4 | 0.0 | 0.014 | 1,D     | 5.9 2.69 | .                  | SOMGT:0:59 0/1:2 G  | C | 0 |
| .     | .  | . | .   | .   | .     | .       | 3.9      | .                  | SOMGT:0:48 0/1:2 C  | T | 0 |
| .     | .  | . | .   | .   | .     | .       | .        | .                  | SOMGT:0:41 0/1:2 C  | T | 0 |
| .     | .  | . | .   | .   | .     | .       | .        | .                  | SOMGT:0:64 0/1:2 G  | C | 0 |
| .     | .  | . | .   | .   | .     | .       | .        | 0 0                | SOMGT:0:9,0 0/1:2 G | T | 0 |
| .     | .  | . | .   | .   | .     | .       | .        | .                  | SOMGT:0:48 0/1:2 G  | A | 0 |
| .     | .  | . | .   | .   | .     | .       | .        | .                  | SOMGT:0:16 0/1:2 C  | T | 0 |
| .     | .  | . | .   | .   | .     | .       | .        | .                  | SOMGT:0:60 0/1:2 G  | A | 0 |
| .     | .  | . | .   | .   | .     | .       | .        | .                  | SOMGT:0:36 0/1:2 A  | G | 0 |
| .     | .  | . | .   | .   | .     | .       | .        | .                  | SOMGT:0:19 0/1:2 G  | A | 0 |
| .     | 0  | 0 | 0.0 | 0.7 | 0.982 | 1,D     | 5.8 3.58 | .                  | SOMGT:0:36 0/1:2 C  | T | 0 |
| .     | .  | . | 0.3 | 0.4 | 0.961 | 1,N     | 4.9 3.65 | .                  | SOMGT:0:11 0/1:2 G  | A | 0 |
| 2E-04 | ## | 0 | 0.1 | 0.0 | 0.178 | 0.993   | 3.2      | .                  | SOMGT:0:51 0/1:2 G  | A | 0 |
| .     | .  | . | .   | .   | .     | .       | .        | .                  | SOMGT:0:29 0/1:2 C  | T | 0 |
| .     | .  | . | .   | .   | .     | .       | 2.8      | .                  | SOMGT:0:35 0/1:2 G  | A | 0 |
| .     | .  | . | .   | .   | .     | .       | .        | .                  | SOMGT:0:39 0/1:2 T  | A | 0 |
| .     | .  | . | .   | .   | .     | .       | .        | 0 0                | SOMGT:0:38 0/1:2 G  | A | 0 |
| .     | .  | . | .   | .   | .     | .       | .        | .                  | SOMGT:0:15 0/1:2 G  | A | 0 |
| .     | .  | . | .   | .   | .     | .       | .        | .                  | SOMGT:0:11 0/1:2 T  | A | 0 |
| .     | .  | . | .   | .   | .     | .       | .        | .                  | SOMGT:0:31 0/1:2 G  | C | 0 |
| .     | .  | . | .   | .   | .     | .       | .        | .                  | SOMGT:0:85 0/1:2 G  | A | 0 |
| .     | .  | . | 0.1 | 0.7 | 0.972 | 1.000   | 2.2 3.43 | .                  | SOMGT:0:32 0/1:2 G  | T | 0 |
| .     | .  | . | .   | .   | .     | .       | .        | .                  | SOMGT:0:25 0/1:2 G  | A | 0 |
| .     | .  | . | 0.1 | 0.9 | 0.991 | 1,D     | 4.8 2.47 | .                  | SOMGT:0:56 0/1:2 G  | C | 0 |
| .     | .  | . | .   | .   | .     | .       | .        | .                  | SOMGT:0:12 0/1:2 G  | C | 0 |
| .     | .  | . | .   | .   | .     | .       | .        | .                  | SOMGT:0:25 0/1:2 G  | A | 0 |

|       |    |     |     |       |       |       |                           |                        |                    |   |   |
|-------|----|-----|-----|-------|-------|-------|---------------------------|------------------------|--------------------|---|---|
|       |    |     |     |       |       |       | SOMGT:0:26 0/1:3 C        | T                      | 0                  |   |   |
| ##    | 0  | 0.1 | 0.0 | 0.008 | 0.999 | 2.58  | SOMGT:0:17 0/1:3 C        | T                      | 0                  |   |   |
|       |    | 0.8 | 0.0 | 0.025 | 1,N   |       | SOMGT:0:46 0/1:3 C        | T                      | 0                  |   |   |
|       |    |     |     | 1,A   | 5.9   | 8.08  | SOMGT:0:46 0/1:3 G        | C                      | 0                  |   |   |
|       |    |     |     |       | 0     | 0.1   | SOMGT:0:10 0/1:1 T        | C                      | 0                  |   |   |
|       |    |     |     |       |       |       | SOMGT:0:40 0/1:1 C        | G                      | 0                  |   |   |
|       |    |     |     |       |       |       | SOMGT:0:26 0/1:3 G        | C                      | 0                  |   |   |
|       |    |     |     |       |       |       | SOMGT:0:9,(0/1:1 G        | A                      | 0                  |   |   |
|       |    |     |     |       |       | 2.4   | SOMGT:0:11 0/1:2 C        | G                      | 0                  |   |   |
|       |    |     |     |       |       |       | SOMGT:0:16 0/1:2 C        | G                      | 0                  |   |   |
|       |    |     |     |       |       |       | SOMGT:0:54 0/1:3 T        | G                      | 0                  |   |   |
|       |    | 0.0 | 0.3 | 0.673 | 0.578 | 6     | SOMGT:0:22 0/1:2 G        | C                      | 0                  |   |   |
|       |    |     |     |       |       | 3     | SOMGT:0:20 0/1:3 C        | T                      | 0                  |   |   |
|       |    |     |     |       |       | 5.1   | SOMGT:0:65 0/1:1 C        | T                      | 0                  |   |   |
|       |    |     |     |       |       | 3     | SOMGT:0:98 0/1:1 G        | A                      | 0                  |   |   |
|       |    |     |     |       |       |       | SOMGT:0:17 0/1:2 G        | A                      | 0                  |   |   |
| ##    | 0  |     |     |       |       | 2.08  | SOMGT:0:30 0/1:3 C        | T                      | 0                  |   |   |
|       |    |     |     |       |       |       | SOMGT:0:24 0/1:3 C        | A                      | 0                  |   |   |
|       |    |     |     |       |       |       | SOMGT:0:20 0/1:3 G        | T                      | 0                  |   |   |
|       |    |     |     |       |       |       | SOMGT:0:24 0/1:2 C        | T                      | 0                  |   |   |
|       |    |     |     |       |       |       | SOMGT:0:78 0/1:1 C        | T                      | 0                  |   |   |
|       |    |     |     | 1,A   | 5.2   | 10.2  | SOMGT:0:32 0/1:3 C        | A                      | 0                  |   |   |
|       | 0  | 0   |     |       |       |       | 0 0 DB;SOMGT:0:45 0/1:3 T | C                      | 0                  |   |   |
|       |    |     |     |       |       |       | SOMGT:0:16 0/1:1 T        | G                      | 0                  |   |   |
|       |    |     |     |       |       |       | SOMGT:0:15 0/1:1 T        | G                      | 0                  |   |   |
|       |    |     |     |       |       | 2     | SOMGT:0:29 0/1:2 G        | T                      | 0                  |   |   |
| ##### | ## | 0   |     |       |       |       | SOMGT:0:72 0/1:1 G        | A                      | 0                  |   |   |
|       |    |     |     |       |       | 2.53  | SOMGT:0:14 0/1:2 G        | A                      | 0                  |   |   |
|       |    |     |     |       |       |       | SOMGT:0:48 0/1:1 G        | C                      | 0                  |   |   |
| ##    | 0  | 0.0 | 0.5 | 0.996 | 1.000 | 4.8   | SOMGT:0:11 0/1:1 G        | A                      | 0                  |   |   |
| ##    | 0  |     |     |       |       | 4.3   | SOMGT:0:68 0/1:1 G        | A                      | 0                  |   |   |
|       |    |     |     |       |       |       | 0                         | SOMGT:0:8,(0/1:1 C     | T                  | 0 |   |
|       |    |     |     |       |       |       | 0                         | SOMGT:0:8,(0/1:1 A     | G                  | 0 |   |
|       |    |     |     |       |       |       |                           | SOMGT:0:12 0/1:2 C     | G                  | 0 |   |
|       |    |     |     |       |       | 1.39  | SOMGT:0:11 0/1:1 G        | A                      | 0                  |   |   |
|       |    |     |     |       |       |       |                           | SOMGT:0:24 0/1:1 G     | A                  | 0 |   |
|       |    |     |     |       |       |       | 0.1                       | 0.1 SOMGT:0:21 0/1:3 A | G                  | 0 |   |
|       |    |     |     |       |       |       |                           | SOMGT:0:93 0/1:1 G     | A                  | 0 |   |
|       |    |     |     |       |       |       |                           | SOMGT:0:26 0/1:2 C     | G                  | 0 |   |
|       |    | 0.0 | 0.9 | 1.0,D | 1,D   | 5     | SOMGT:0:28 0/1:3 G        | A                      | 0                  |   |   |
|       |    |     |     |       |       | 1,A   | 4.6                       | 3.58                   | SOMGT:0:71 0/1:1 C | T | 0 |
|       |    | 0.0 | 0.1 | 0.463 |       | 2.3   | 4.08                      | SOMGT:0:22 0/1:2 C     | T                  | 0 |   |
|       |    | 0.0 | 0.6 | 0.933 | 1,D   | 4.2   | 3.80                      | SOMGT:0:77 0/1:1 A     | G                  | 0 |   |
|       |    |     |     |       |       | 2.2   |                           | SOMGT:0:65 0/1:3 G     | T                  | 0 |   |
|       |    |     |     |       |       |       |                           | SOMGT:0:11 0/1:2 C     | A                  | 0 |   |
| ##    | 0  | 0.6 | 0.9 | 1.0,D | 0.836 | 4     | 3.94                      | SOMGT:0:77 0/1:1 C     | T                  | 0 |   |
|       |    |     |     |       |       | 2.32  |                           | SOMGT:0:43 0/1:3 T     | G                  | 0 |   |
|       |    |     |     |       |       |       |                           | SOMGT:0:29 0/1:3 C     | T                  | 0 |   |
| 2E-04 | ## | 0   | 0.9 | 0.0   | 0.016 | 0.983 | 3.8                       | SOMGT:0:53 0/1:3 C     | T                  | 0 |   |
|       |    |     |     |       |       | 1.36  |                           | SOMGT:0:22 0/1:2 C     | G                  | 0 |   |
|       |    | 0.0 | 0.9 | 0.999 | 1,D   | 3.1   | 2.73                      | SOMGT:0:14 0/1:2 C     | G                  | 0 |   |
|       |    |     |     |       |       | 3     | 1.80                      | SOMGT:0:94 0/1:1 G     | T                  | 0 |   |
|       |    | 0.0 | 0.4 | 0.697 | 1,D   | 4     | 4.83                      | SOMGT:0:33 0/1:2 G     | A                  | 0 |   |
|       |    |     |     |       |       | 2.3   |                           | SOMGT:0:24 0/1:2 G     | A                  | 0 |   |



|       |   |     |     |       |       |           |                    |   |   |
|-------|---|-----|-----|-------|-------|-----------|--------------------|---|---|
| .     | . | .   | .   | .     | .     | .         | SOMGT:0:51 0/1:ξC  | T | 0 |
| ##    | 0 | .   | .   | .     | .     | .         | SOMGT:0:93 0/1:ξC  | T | 0 |
| .     | . | 0.6 | 0.0 | 0.017 | 0.921 | 5.6 1.76. | SOMGT:0:28 0/1:ξC  | G | 0 |
| .     | . | .   | .   | .     | .     | 3.4 3.20. | SOMGT:0:11 0/1:ξG  | A | 0 |
| .     | . | .   | .   | .     | .     | 0 0       | SOMGT:0:82 0/1:ξT  | C | 0 |
| .     | . | .   | .   | .     | .     | 0 0       | SOMGT:0:89 0/1:ξC  | T | 0 |
| .     | . | .   | .   | .     | .     | 0 0       | SOMGT:0:15 0/1:ξC  | T | 0 |
| .     | . | 0.3 | 0.9 | 1.0   | D 1,D | 6.2 5.79. | SOMGT:0:35 0/1:ξC  | T | 0 |
| .     | . | .   | .   | .     | .     | 2.83.     | SOMGT:0:79 0/1:ξC  | G | 0 |
| .     | . | .   | .   | .     | .     | .         | SOMGT:0:47 0/1:ξC  | T | 0 |
| .     | . | .   | .   | .     | .     | 2.7 1.91. | SOMGT:0:65 0/1:ξC  | T | 0 |
| ##    | 0 | 0.0 | 0.9 | 1.0   | D 1,D | 4 3.20    | SOMGT:0:9,(0/1:ξG  | A | 0 |
| .     | . | 0.0 | 0.1 | 0.347 | 1,N   | 2.37.     | SOMGT:0:37 0/1:ξG  | A | 0 |
| .     | . | .   | .   | .     | .     | .         | SOMGT:0:17 0/1:ξG  | C | 0 |
| .     | . | 0.0 | 0.5 | 0.96  | 1,N   | 3.9.      | SOMGT:0:38 0/1:ξC  | G | 0 |
| .     | . | 0.3 | 0.0 | 0.002 | 1,N   | 4.3.      | SOMGT:0:15 0/1:ξC  | T | 0 |
| .     | . | .   | .   | .     | .     | 3.2.      | SOMGT:0:15 0/1:ξC  | G | 0 |
| .     | . | .   | .   | .     | .     | .         | SOMGT:0:8,(0/1:ξG  | A | 0 |
| .     | . | .   | .   | .     | .     | .         | SOMGT:0:12 0/1:ξC  | T | 0 |
| .     | . | .   | .   | .     | .     | 2.04.     | SOMGT:0:18 0/1:ξC  | T | 0 |
| .     | . | .   | .   | .     | .     | .         | SOMGT:0:24 0/1:ξT  | G | 0 |
| .     | . | 0.0 | .   | .     | 1,N   | .         | SOMGT:0:36 0/1:ξC  | A | 0 |
| .     | . | 0.0 | 0.9 | 1.0   | D 1,D | 6 4.89.   | SOMGT:0:45 0/1:ξG  | C | 0 |
| .     | . | .   | .   | .     | .     | .         | SOMGT:0:10 0/1:ξC  | T | 0 |
| .     | . | .   | .   | .     | .     | .         | SOMGT:0:43 0/1:ξC  | T | 0 |
| .     | . | .   | .   | .     | .     | .         | SOMGT:0:21 0/1:ξG  | A | 0 |
| ##    | 0 | .   | .   | .     | .     | .         | SOMGT:0:47 0/1:ξG  | A | 0 |
| .     | . | .   | .   | .     | .     | .         | SOMGT:0:37 0/1:ξG  | A | 0 |
| .     | . | .   | .   | .     | .     | .         | SOMGT:0:45 0/1:ξC  | G | 0 |
| .     | . | .   | .   | .     | .     | 2.7 2.30. | SOMGT:0:15 0/1:ξA  | C | 0 |
| .     | . | 0.0 | 0.9 | 0.998 | 1.000 | 5.2 4.92. | SOMGT:0:25 0/1:ξG  | C | 0 |
| .     | . | .   | .   | .     | 1.000 | 3.6 1.82. | SOMGT:0:65 0/1:ξG  | C | 0 |
| .     | . | .   | .   | .     | .     | .         | SOMGT:0:32 0/1:ξC  | A | 0 |
| 0     | 0 | .   | .   | .     | .     | 5.1 1.83. | SOMGT:0:99 0/1:ξG  | T | 0 |
| .     | . | .   | .   | .     | .     | 0 0.3     | SOMGT:0:8,(0/1:ξC  | T | 0 |
| .     | . | .   | .   | .     | .     | .         | SOMGT:0:16 0/1:ξA  | C | 0 |
| .     | . | .   | .   | .     | .     | 2.2.      | SOMGT:0:53 0/1:ξG  | A | 0 |
| .     | . | .   | .   | .     | .     | .         | SOMGT:0:16 0/1:ξG  | A | 0 |
| .     | . | .   | .   | .     | .     | .         | SOMGT:0:16 0/1:ξC  | T | 0 |
| .     | . | .   | .   | .     | .     | .         | SOMGT:0:9,(0/1:ξG  | C | 0 |
| 8E-04 | 0 | 0   | .   | .     | .     | .         | SOMGT:0:14 0/1:ξC  | T | 0 |
| .     | . | .   | .   | .     | .     | .         | SOMGT:0:23 0/1:ξC  | A | 0 |
| .     | . | .   | .   | .     | .     | .         | SOMGT:0:22 0/1:ξC  | A | 0 |
| .     | . | .   | .   | .     | .     | .         | SOMGT:0:41 0/1:ξC  | A | 0 |
| .     | . | 0.0 | 0.5 | 0.994 | 0.662 | 4.2 3.13. | SOMGT:0:53 0/1:ξG  | A | 0 |
| .     | . | .   | .   | .     | .     | .         | SOMGT:0:14 0/1:ξC  | T | 0 |
| .     | . | .   | .   | .     | .     | .         | SOMGT:0:39 0/1:ξG  | A | 0 |
| .     | . | .   | .   | .     | .     | .         | SOMGT:0:37 0/1:ξG  | C | 0 |
| .     | . | .   | .   | .     | .     | 0         | SOMGT:0:67 0/1:ξG  | A | 0 |
| ##### | . | .   | .   | .     | .     | 1.75.     | SOMGT:0:53 0/1:ξG  | A | 0 |
| .     | . | .   | .   | .     | .     | 0 0       | SOMGT:0:14 0/1:ξT  | G | 0 |
| .     | . | .   | .   | .     | .     | .         | SOMGT:0:58 0/1:ξG  | A | 0 |
| .     | . | .   | .   | .     | .     | 0 0.1     | DB;ξGT:0:31 0/1:ξG | A | 0 |
| .     | . | .   | .   | .     | .     | .         | SOMGT:0:20 0/1:ξC  | T | 0 |

|    |   |               |           |     |      |                      |                   |                   |   |   |
|----|---|---------------|-----------|-----|------|----------------------|-------------------|-------------------|---|---|
|    |   |               |           |     |      | SOMGT:0:9,(0/1):C    | A                 | 0                 |   |   |
| ## | 0 |               |           | 4.2 | 1.36 | SOMGT:0:13 0/1):C    | T                 | 0                 |   |   |
|    |   |               |           |     |      | SOMGT:0:13 0/1):T    | G                 | 0                 |   |   |
|    |   |               |           |     | 1.97 | SOMGT:0:24 0/1):T    | G                 | 0                 |   |   |
|    |   |               |           |     |      | SOMGT:0:48 0/1):T    | C                 | 0                 |   |   |
|    |   |               |           |     | 0    | 0 SOMGT:0:60 0/1):C  | A                 | 0                 |   |   |
|    |   |               |           |     | 1.94 | SOMGT:0:87 0/1):C    | T                 | 0                 |   |   |
|    |   |               |           |     | 3.36 | SOMGT:0:41 0/1):C    | T                 | 0                 |   |   |
|    |   | 0.0:0.9       | 1.0,D 1,D | 5.8 | 4.85 | SOMGT:0:76 0/1):C    | G                 | 0                 |   |   |
| ## | 0 |               |           |     |      | SOMGT:0:77 0/1):G    | A                 | 0                 |   |   |
|    |   |               |           |     |      | SOMGT:0:16 0/1):G    | T                 | 0                 |   |   |
|    |   |               |           |     |      | SOMGT:0:29 0/1):C    | T                 | 0                 |   |   |
|    |   |               |           |     |      | SOMGT:0:33 0/1):C    | T                 | 0                 |   |   |
|    |   |               |           |     | 0    | 0 SOMGT:0:9,(0/1):G  | A                 | 0                 |   |   |
|    |   |               |           |     |      | SOMGT:0:16 0/1):G    | A                 | 0                 |   |   |
|    |   |               |           |     | 3    | 1.84                 | SOMGT:0:23 0/1):G | A                 | 0 |   |
|    |   |               |           |     |      | SOMGT:0:23 0/1):C    | T                 | 0                 |   |   |
|    |   |               |           |     | 0    | SOMGT:0:56 0/1):C    | T                 | 0                 |   |   |
|    |   |               |           |     |      | SOMGT:0:52 0/1):C    | A                 | 0                 |   |   |
|    |   |               |           |     |      | SOMGT:0:22 0/1):G    | C                 | 0                 |   |   |
|    |   |               |           |     |      | SOMGT:0:29 0/1):G    | A                 | 0                 |   |   |
|    |   |               |           |     |      | SOMGT:0:11 0/1):C    | T                 | 0                 |   |   |
|    |   | 0.0:0.9:0.999 | 1,D       | 4   | 4.10 | SOMGT:0:97 0/1):C    | T                 | 0                 |   |   |
|    |   | 0.0:0.0:0.214 | 1,N       |     |      | SOMGT:0:98 0/1):C    | G                 | 0                 |   |   |
|    |   |               |           |     | 0    | 0 DB:SGT:0:22 0/1):T | C                 | 0                 |   |   |
|    |   |               |           |     |      | SOMGT:0:27 0/1):C    | T                 | 0                 |   |   |
|    |   | 0.2:0.1:0.587 | 1,D       | 5.5 | 2.88 | SOMGT:0:55 0/1):C    | G                 | 0                 |   |   |
|    |   |               |           |     |      | SOMGT:0:10 0/1):C    | G                 | 0                 |   |   |
|    |   |               |           |     | 0    | SOMGT:0:14 0/1):C    | T                 | 0                 |   |   |
| ## | 0 | 0.8:0.0:0.102 | 1,N       |     |      | 0 SOMGT:0:31 0/1):C  | T                 | 0                 |   |   |
| ## | 0 | 0.9:0.999     | 1,D       | 5.7 | 3.83 | SOMGT:0:89 0/1):G    | A                 | 0                 |   |   |
|    |   |               |           |     |      | SOMGT:0:28 0/1):C    | T                 | 0                 |   |   |
|    |   |               |           |     |      | SOMGT:0:44 0/1):G    | A                 | 0                 |   |   |
|    |   |               |           |     | 1,A  | 5.1                  | 5.03              | SOMGT:0:67 0/1):G | A | 0 |
|    |   | 0.0:0.2:0.759 | 0.676     | 4.4 | 4.04 | SOMGT:0:57 0/1):C    | T                 | 0                 |   |   |
|    |   |               |           |     |      | SOMGT:0:21 0/1):G    | A                 | 0                 |   |   |
|    |   |               |           |     | 0    | SOMGT:0:11 0/1):C    | T                 | 0                 |   |   |
| ## | 0 |               |           |     | 0    | 0 SOMGT:0:10 0/1):T  | C                 | 0                 |   |   |
| ## | 0 | 0.1:0.9:0.997 | 1.000     | 5.9 | 4.60 | SOMGT:0:46 0/1):C    | T                 | 0                 |   |   |
|    |   |               |           |     |      | SOMGT:0:45 0/1):G    | A                 | 0                 |   |   |
|    |   |               |           |     |      | SOMGT:0:8,(0/1):C    | T                 | 0                 |   |   |
|    |   |               |           |     |      | SOMGT:0:62 0/1):A    | G                 | 0                 |   |   |
|    |   | 0.1:0.9:0.999 | 1,D       | 5.8 | 5.29 | SOMGT:0:72 0/1):C    | G                 | 0                 |   |   |
|    |   |               |           |     |      | SOMGT:0:10 0/1):G    | A                 | 0                 |   |   |
|    |   |               |           |     |      | SOMGT:0:65 0/1):G    | A                 | 0                 |   |   |
|    |   |               |           |     |      | SOMGT:0:89 0/1):T    | A                 | 0                 |   |   |
|    |   |               |           |     | 2.1  | SOMGT:0:12 0/1):C    | T                 | 0                 |   |   |
|    |   |               |           |     | 0    | DB:SGT:0:32 0/1):A   | C                 | 0                 |   |   |
| ## | 0 |               |           |     |      | SOMGT:0:11 0/1):C    | G                 | 0                 |   |   |
|    |   | 0.0:0.9:0.999 | 1,D       | 5.9 | 5.60 | SOMGT:0:67 0/1):C    | T                 | 0                 |   |   |
|    |   | 0.0:0.9:0.999 | 1,D       | 5   | 4.69 | SOMGT:0:88 0/1):C    | G                 | 0                 |   |   |
|    |   |               |           |     | 2.8  | 2.61                 | SOMGT:0:10 0/1):T | A                 | 0 |   |
|    |   |               |           |     | 0.1  | SOMGT:0:22 0/1):A    | G                 | 0                 |   |   |
|    |   |               |           |     |      | SOMGT:0:27 0/1):G    | A                 | 0                 |   |   |

|       |    |     |     |       |       |  |          |                    |   |   |
|-------|----|-----|-----|-------|-------|--|----------|--------------------|---|---|
|       |    |     |     |       |       |  |          | SOMGT:0:13 0/1:2 C | T | 0 |
|       | ## | 0   |     |       |       |  |          | SOMGT:0:12 0/1:2 C | T | 0 |
|       |    |     |     |       |       |  |          | SOMGT:0:45 0/1:9 C | T | 0 |
|       |    | 0.0 | 0.0 | 0.332 | 0.914 |  | 2.91     | SOMGT:0:42 0/1:9 C | G | 0 |
|       |    |     |     |       |       |  | 4.3      | SOMGT:0:30 0/1:9 C | T | 0 |
|       |    | 0.0 | 0.9 | 0.996 | 1.000 |  | 3.9 4.25 | SOMGT:0:52 0/1:8 A | G | 0 |
|       |    | 0.7 | 0.1 | 0.652 | 1,N   |  |          | SOMGT:0:23 0/1:4 G | C | 0 |
|       |    |     |     |       |       |  |          | SOMGT:0:23 0/1:4 G | A | 0 |
|       |    |     |     |       |       |  |          | SOMGT:0:53 0/1:6 C | G | 0 |
|       |    |     |     |       |       |  |          | SOMGT:0:70 0/1:7 G | C | 0 |
|       |    |     |     |       |       |  |          | SOMGT:0:34 0/1:6 C | T | 0 |
|       |    |     |     |       |       |  |          | SOMGT:0:13 0/1:2 G | A | 0 |
|       |    |     |     |       |       |  | 0        | SOMGT:0:35 0/1:9 G | A | 0 |
|       |    |     |     |       |       |  |          | SOMGT:0:26 0/1:3 C | T | 0 |
|       |    |     |     |       |       |  | 2.06     | SOMGT:0:70 0/1:7 G | C | 0 |
|       |    |     |     |       |       |  | 4.3 2.33 | SOMGT:0:10 0/1:7 G | A | 0 |
|       |    | 0.0 | 0.6 | 0.991 | 1,D   |  | 4.8 2.26 | SOMGT:0:24 0/1:3 C | G | 0 |
|       |    |     |     |       |       |  | 4.7      | SOMGT:0:17 0/1:2 C | A | 0 |
|       |    |     |     |       |       |  |          | SOMGT:0:13 0/1:3 G | C | 0 |
|       |    |     |     |       |       |  |          | SOMGT:0:16 0/1:2 G | T | 0 |
|       |    |     |     |       |       |  |          | SOMGT:0:49 0/1:9 C | T | 0 |
|       |    |     |     |       |       |  | 1.26     | SOMGT:0:10 0/1:7 G | A | 0 |
|       |    |     |     |       |       |  | 4.3 3.84 | SOMGT:0:27 0/1:4 G | C | 0 |
|       |    |     |     |       |       |  | 3.4 2.30 | SOMGT:0:50 0/1:7 G | A | 0 |
|       |    |     |     |       |       |  |          | SOMGT:0:15 0/1:3 C | A | 0 |
|       |    | 0.0 | 0.2 | 0.412 | 1,D   |  | 5.4 2.54 | SOMGT:0:73 0/1:7 G | C | 0 |
|       |    |     |     |       |       |  | 2        | SOMGT:0:33 0/1:7 C | T | 0 |
|       |    |     |     |       |       |  | 2.3      | SOMGT:0:24 0/1:3 G | A | 0 |
|       |    |     |     |       |       |  |          | SOMGT:0:36 0/1:9 C | T | 0 |
|       |    |     |     |       |       |  | 1.24     | SOMGT:0:45 0/1:8 C | T | 0 |
|       |    |     |     |       |       |  |          | SOMGT:0:33 0/1:4 C | T | 0 |
|       |    |     |     |       |       |  | 4.4 1.99 | SOMGT:0:17 0/1:3 C | G | 0 |
|       |    | 0.0 | 0.0 | 0.012 | 0.992 |  | 6 2.11   | SOMGT:0:24 0/1:3 G | C | 0 |
|       |    | 0.0 | 0.0 | 0.029 | 0.985 |  | 3.9 1.98 | SOMGT:0:24 0/1:3 G | T | 0 |
|       |    |     |     |       |       |  |          | SOMGT:0:36 0/1:3 T | G | 0 |
|       |    |     |     |       |       |  |          | SOMGT:0:11 0/1:7 G | C | 0 |
| 6E-04 | 0  | 0   |     |       |       |  | 2.4      | SOMGT:0:49 0/1:9 C | T | 0 |
|       |    |     |     |       |       |  | 5.3 1.40 | SOMGT:0:11 0/1:7 C | T | 0 |
|       |    |     |     |       |       |  |          | SOMGT:0:8,0/1:7 A  | G | 0 |
|       |    |     |     |       |       |  | 0.1 0    | SOMGT:0:19 0/1:3 G | C | 0 |
|       |    |     |     |       |       |  |          | SOMGT:0:11 0/1:2 G | A | 0 |
|       |    | 0.0 | 0.0 | 0.053 | 0.868 |  | 3.3 2.65 | SOMGT:0:42 0/1:7 C | G | 0 |
|       |    |     |     |       |       |  | 2.3      | SOMGT:0:14 0/1:3 G | C | 0 |
|       |    | 0.0 |     |       | 1,D   |  | 5.1 4.06 | SOMGT:0:30 0/1:6 C | G | 0 |
|       |    | 1.0 | 0.0 | 0.001 | 1,D   |  |          | SOMGT:0:37 0/1:8 G | A | 0 |
|       |    |     |     |       |       |  |          | SOMGT:0:20 0/1:3 C | T | 0 |
|       |    |     |     |       |       |  |          | SOMGT:0:11 0/1:7 G | T | 0 |
|       |    | 0.0 |     |       | 1,D   |  | 3.8 3.39 | SOMGT:0:85 0/1:7 C | T | 0 |
|       |    |     |     |       |       |  | 2.3      | SOMGT:0:11 0/1:7 G | A | 0 |
|       |    |     |     |       |       |  |          | SOMGT:0:13 0/1:3 C | T | 0 |
|       |    |     |     |       |       |  |          | SOMGT:0:34 0/1:9 C | T | 0 |
|       |    |     |     |       |       |  | 3.6      | SOMGT:0:38 0/1:6 G | A | 0 |
|       |    |     |     |       |       |  |          | SOMGT:0:29 0/1:4 A | G | 0 |
|       |    |     |     |       |       |  |          | SOMGT:0:18 0/1:2 C | T | 0 |

|       |   |     |       |           |        |                  |                  |   |   |
|-------|---|-----|-------|-----------|--------|------------------|------------------|---|---|
|       |   |     |       |           |        | SOMGT:0:59 0/1:G | A                | 0 |   |
|       |   |     |       |           |        | SOMGT:0:12 0/1:G | C                | 0 |   |
|       |   |     |       |           |        | SOMGT:0:38 0/1:G | T                | 0 |   |
| 9E-04 | 0 | 0   |       |           |        | SOMGT:0:50 0/1:G | A                | 0 |   |
|       |   |     |       |           | 0 0.1  | SOMGT:0:9,(0/1:A | T                | 0 |   |
|       |   |     | 1,A   | 5.18.     |        | SOMGT:0:58 0/1:G | T                | 0 |   |
|       |   |     |       |           |        | SOMGT:0:36 0/1:G | A                | 0 |   |
|       |   |     |       | 1.54.     |        | SOMGT:0:13 0/1:C | T                | 0 |   |
|       |   |     |       |           |        | SOMGT:0:13 0/1:C | C                | 0 |   |
|       |   |     |       |           |        | SOMGT:0:8,(0/1:G | A                | 0 |   |
|       |   |     |       |           |        | SOMGT:0:69 0/1:T | A                | 0 |   |
|       |   |     |       |           |        | SOMGT:0:9,(0/1:A | G                | 0 |   |
|       |   |     |       |           |        | SOMGT:0:13 0/1:C | C                | 0 |   |
|       |   |     |       |           |        | SOMGT:0:39 0/1:C | G                | 0 |   |
|       |   |     | 1,A   | 2.1 49.9. |        | SOMGT:0:95 0/1:G | T                | 0 |   |
|       |   | 0.0 | 0.2   | 0.37      | 1,N    | SOMGT:0:89 0/1:G | A                | 0 |   |
|       |   |     |       |           |        | SOMGT:0:62 0/1:G | A                | 0 |   |
| ##    | 0 | 0.0 | 0.6   | 0.7       | P 1,N  | SOMGT:0:10 0/1:G | A                | 0 |   |
|       |   |     |       |           |        | SOMGT:0:57 0/1:C | T                | 0 |   |
|       |   | 0.0 | 0.9   | 1.0       | D 0.82 | SOMGT:0:89 0/1:G | C                | 0 |   |
|       |   |     |       |           |        | SOMGT:0:90 0/1:G | A                | 0 |   |
|       |   |     |       |           |        | SOMGT:0:71 0/1:G | T                | 0 |   |
|       |   | 0.1 | 0.6   | 0.95      | 1,N    | SOMGT:0:31 0/1:C | G                | 0 |   |
|       | 0 | 0   | 0.1   | 0.0       | 0.01   | 1,N              | SOMGT:0:44 0/1:G | A | 0 |
|       |   |     |       |           |        | SOMGT:0:9,(0/1:G | A                | 0 |   |
|       |   |     |       |           |        | SOMGT:0:97 0/1:A | T                | 0 |   |
|       |   | 0.0 | 0.015 | 1,N       |        | SOMGT:0:18 0/1:C | T                | 0 |   |
|       |   |     |       |           |        | SOMGT:0:10 0/1:G | A                | 0 |   |
|       |   |     |       |           |        | SOMGT:0:39 0/1:C | G                | 0 |   |
|       |   | 0.0 | 0.9   | 0.99      | 0.99   | 6 4.03.          | SOMGT:0:70 0/1:G | A | 0 |
|       |   |     |       |           |        | 3.43.            | SOMGT:0:41 0/1:G | C | 0 |
|       |   |     |       |           |        |                  | SOMGT:0:11 0/1:T | G | 0 |
|       |   |     |       |           |        |                  | SOMGT:0:11 0/1:T | C | 0 |
| ##    | 0 |     | 0.7   | 0.99      | 1,D    | SOMGT:0:12 0/1:C | T                | 0 |   |
|       |   |     |       |           |        | SOMGT:0:32 0/1:C | T                | 0 |   |
|       |   |     |       |           |        | 3.20.            | SOMGT:0:12 0/1:G | A | 0 |
|       |   |     |       |           |        | 0 0              | SOMGT:0:11 0/1:C | T | 0 |
|       |   |     |       |           |        | 5.4 1.35.        | SOMGT:0:50 0/1:G | C | 0 |
|       |   |     |       |           |        |                  | SOMGT:0:68 0/1:C | T | 0 |
|       |   |     |       |           |        | 0.               | SOMGT:0:33 0/1:G | A | 0 |
|       |   |     |       |           |        |                  | SOMGT:0:8,(0/1:G | C | 0 |
| 0.003 | 0 | 0   |       |           |        | 0 DB;G           | GT:0:52 0/1:G    | A | 0 |
|       |   | 0.5 | 0.0   | 0.08      | 1,N    | 2.3.             | SOMGT:0:11 0/1:C | G | 0 |
|       |   |     |       |           |        |                  | SOMGT:0:35 0/1:G | T | 0 |
|       |   |     |       |           |        |                  | SOMGT:0:13 0/1:C | A | 0 |
|       |   |     |       |           |        |                  | SOMGT:0:79 0/1:G | A | 0 |
|       |   |     |       |           |        | 0.               | SOMGT:0:8,(0/1:T | G | 0 |
|       |   |     |       |           |        |                  | SOMGT:0:34 0/1:C | A | 0 |
|       |   | 0.4 | 0.3   | 0.82      | 1,N    | 3.2.             | SOMGT:0:55 0/1:G | C | 0 |
|       |   | 0.0 | 0.9   | 1.0       | D 0.99 | 1.34.            | SOMGT:0:49 0/1:G | C | 0 |
|       |   | 0.0 | 0.0   | 0.02      | 1.00   |                  | SOMGT:0:44 0/1:G | C | 0 |
|       |   |     |       |           |        |                  | SOMGT:0:10 0/1:C | T | 0 |
|       |   |     |       |           |        |                  | SOMGT:0:20 0/1:T | G | 0 |
|       |   |     |       |           |        |                  | SOMGT:0:14 0/1:C | A | 0 |

|       |    |                         |               |                     |                     |   |   |
|-------|----|-------------------------|---------------|---------------------|---------------------|---|---|
| .     | .  | 0.0 0.8 0.9941,N        | 1.83.         | SOMGT:0:80 0/1:G    | A                   | 0 |   |
| ##    | 0  | 0.0 0.8 0.99 0.998      | 3.67.         | SOMGT:0:23 0/1:C    | G                   | 0 |   |
| .     | .  | .                       | 2.            | SOMGT:0:32 0/1:C    | G                   | 0 |   |
| .     | .  | .                       | 5.2 3.13.     | SOMGT:0:32 0/1:G    | A                   | 0 |   |
| .     | .  | .                       | 0.1 0.2       | SOMGT:0:21 0/1:C    | G                   | 0 |   |
| .     | 0  | 0.0 0.5 0.526 0.995     | 2.37 0.1 0.3  | DB;SOMGT:0:22 0/1:G | A                   | 0 |   |
| .     | .  | .                       | .             | SOMGT:0:30 0/1:C    | T                   | 0 |   |
| .     | .  | .                       | 1.29.         | SOMGT:0:91 0/1:C    | G                   | 0 |   |
| ##### | ## | 0.0 0.0 0.0,B 0.998     | 2.7 1.92.     | SOMGT:0:63 0/1:C    | T                   | 0 |   |
| .     | .  | .                       | 1,A 4 4.42.   | SOMGT:0:64 0/1:C    | T                   | 0 |   |
| .     | .  | .                       | 1,A 5.5 8.81. | SOMGT:0:20 0/1:C    | T                   | 0 |   |
| .     | .  | .                       | 4.1.          | SOMGT:0:23 0/1:C    | T                   | 0 |   |
| .     | .  | .                       | .             | SOMGT:0:15 0/1:G    | T                   | 0 |   |
| .     | .  | .                       | .             | SOMGT:0:42 0/1:G    | A                   | 0 |   |
| .     | .  | .                       | 0 0           | SOMGT:0:11 0/1:G    | A                   | 0 |   |
| .     | .  | .                       | 0 0.1         | SOMGT:0:11 0/1:C    | T                   | 0 |   |
| .     | .  | .                       | 0 0           | DB;SOMGT:0:22 0/1:A | C                   | 0 |   |
| .     | .  | .                       | 0 0           | SOMGT:0:23 0/1:T    | G                   | 0 |   |
| .     | .  | .                       | 0.1 0.1       | SOMGT:0:15 0/1:G    | A                   | 0 |   |
| .     | .  | .                       | 1.41.         | DB;SOMGT:0:54 0/1:C | T                   | 0 |   |
| .     | .  | .                       | 0 0           | SOMGT:0:9,(0/1:C    | A                   | 0 |   |
| .     | .  | .                       | .             | SOMGT:0:38 0/1:T    | C                   | 0 |   |
| .     | .  | .                       | .             | SOMGT:0:32 0/1:G    | A                   | 0 |   |
| .     | .  | .                       | .             | SOMGT:0:75 0/1:G    | A                   | 0 |   |
| .     | .  | 0.0 1.0,1.0,D 1.000     | 3.7 3.81.     | DB;SOMGT:0:87 0/1:G | C                   | 0 |   |
| .     | .  | .                       | 0.1 0.4       | DB;SOMGT:0:32 0/1:G | A                   | 0 |   |
| .     | .  | .                       | .             | SOMGT:0:42 0/1:C    | G                   | 0 |   |
| .     | .  | .                       | .             | SOMGT:0:70 0/1:C    | T                   | 0 |   |
| .     | .  | .                       | .             | SOMGT:0:13 0/1:T    | A                   | 0 |   |
| .     | .  | .                       | 0 0           | SOMGT:0:11 0/1:G    | C                   | 0 |   |
| .     | .  | .                       | 0 0           | SOMGT:0:8,(0/1:G    | T                   | 0 |   |
| 0.05  | 0  | 0.0 0.5 0.0 0.026 0.999 | .             | 0 0                 | DB;SOMGT:0:60 0/1:C | T | 0 |
| .     | .  | .                       | .             | SOMGT:0:30 0/1:G    | A                   | 0 |   |
| .     | .  | .                       | .             | 0                   | SOMGT:0:8,(0/1:C    | G | 0 |
| .     | .  | .                       | 0.2 0.4       | SOMGT:0:14 0/1:G    | C                   | 0 |   |
| .     | .  | .                       | 0 0           | SOMGT:0:11 0/1:C    | T                   | 0 |   |
| .     | .  | .                       | 3.3.          | SOMGT:0:32 0/1:C    | G                   | 0 |   |
| .     | .  | .                       | .             | SOMGT:0:12 0/1:G    | A                   | 0 |   |
| .     | .  | .                       | 1.37.         | SOMGT:0:17 0/1:G    | T                   | 0 |   |
| ##    | 0  | .                       | 2.00.         | SOMGT:0:12 0/1:G    | A                   | 0 |   |
| .     | .  | .                       | .             | SOMGT:0:14 0/1:G    | C                   | 0 |   |
| .     | .  | 0.0 0.0 0.026 1,N       | 1.58.         | SOMGT:0:70 0/1:G    | C                   | 0 |   |
| ##### | ## | 0.0 0.9 1.0,D 1.000     | 4.7 3.81.     | SOMGT:0:46 0/1:G    | T                   | 0 |   |
| .     | .  | 0.0 0.0 0.016 0.826     | 4.5 1.39.     | SOMGT:0:11 0/1:G    | C                   | 0 |   |
| ##### | ## | 0.                      | .             | SOMGT:0:88 0/1:G    | A                   | 0 |   |
| .     | .  | .                       | .             | SOMGT:0:30 0/1:C    | G                   | 0 |   |
| .     | .  | .                       | .             | SOMGT:0:16 0/1:C    | T                   | 0 |   |
| .     | .  | .                       | .             | SOMGT:0:9,(0/1:G    | A                   | 0 |   |
| ##    | 0  | .                       | .             | SOMGT:0:12 0/1:G    | A                   | 0 |   |
| .     | .  | .                       | .             | SOMGT:0:16 0/1:C    | T                   | 0 |   |
| .     | .  | .                       | .             | SOMGT:0:9,(0/1:G    | A                   | 0 |   |
| ##    | 0  | .                       | .             | SOMGT:0:13 0/1:T    | C                   | 0 |   |
| .     | .  | .                       | 0 0           | SOMGT:0:19 0/1:G    | A                   | 0 |   |
| .     | .  | 0.0 0.0 0.005 1,N       | 3.9.          | SOMGT:0:47 0/1:C    | G                   | 0 |   |

|   |    |     |     |       |       |       |      |                    |                    |               |   |   |
|---|----|-----|-----|-------|-------|-------|------|--------------------|--------------------|---------------|---|---|
| . | .  | .   | .   | .     | 1,D   | 5.6   | 5.60 | .                  | SOMGT:0:67 0/1:0 C | A             | 0 |   |
| . | .  | .   | .   | .     | .     | .     | .    | .                  | SOMGT:0:27 0/1:0 G | T             | 0 |   |
| . | .  | 0.0 | 0.1 | 0.645 | 1,D   | 5.9   | 4.00 | .                  | SOMGT:0:60 0/1:0 G | A             | 0 |   |
| . | .  | .   | .   | .     | .     | .     | .    | .                  | SOMGT:0:53 0/1:0 G | A             | 0 |   |
| . | .  | .   | .   | .     | .     | .     | .    | .                  | SOMGT:0:20 0/1:0 G | A             | 0 |   |
| . | .  | .   | .   | .     | .     | 2.04  | .    | .                  | SOMGT:0:32 0/1:0 C | G             | 0 |   |
| . | .  | .   | .   | .     | .     | 5.1   | 1.74 | .                  | SOMGT:0:64 0/1:0 G | A             | 0 |   |
| . | .  | .   | .   | .     | .     | 2.6   | 2.43 | .                  | SOMGT:0:34 0/1:0 A | G             | 0 |   |
| . | .  | .   | .   | .     | .     | .     | .    | .                  | SOMGT:0:53 0/1:0 G | A             | 0 |   |
| . | .  | .   | .   | .     | .     | .     | .    | .                  | SOMGT:0:32 0/1:0 C | T             | 0 |   |
| . | .  | .   | .   | .     | .     | 0     | 0    | SOMGT:0:14 0/1:0 T | C                  | 0             |   |   |
| . | .  | .   | .   | .     | 1,A   | 4.7   | 9.66 | .                  | SOMGT:0:62 0/1:0 C | G             | 0 |   |
| . | .  | .   | .   | .     | 1,A   | 4.4   | 6.48 | .                  | SOMGT:0:48 0/1:0 G | A             | 0 |   |
| . | .  | .   | .   | .     | .     | .     | .    | .                  | SOMGT:0:23 0/1:0 C | G             | 0 |   |
| . | .  | .   | .   | .     | .     | .     | .    | .                  | SOMGT:0:48 0/1:0 G | A             | 0 |   |
| . | .  | .   | .   | .     | 1,A   | 5.2   | 5.59 | .                  | SOMGT:0:38 0/1:0 C | T             | 0 |   |
| . | .  | 0.0 | 0.7 | 0.935 | 1,N   | .     | 1.24 | .                  | SOMGT:0:22 0/1:0 G | C             | 0 |   |
| . | .  | 0.0 | 0.5 | 0.875 | 1.000 | 4.9   | 3.19 | .                  | SOMGT:0:74 0/1:0 G | A             | 0 |   |
| . | .  | .   | .   | .     | .     | .     | .    | .                  | SOMGT:0:24 0/1:0 G | A             | 0 |   |
| . | .  | 0.4 | 0.0 | 0.001 | 1.000 | 4.3   | 1.36 | .                  | SOMGT:0:78 0/1:0 C | T             | 0 |   |
| . | .  | 0.2 | 0.0 | 0.008 | 0.797 | 4.1   | .    | .                  | SOMGT:0:20 0/1:0 G | A             | 0 |   |
| . | 0  | 0   | 0.6 | 0.8   | 0.998 | 0.834 | 4.1  | .                  | SOMGT:0:63 0/1:0 G | A             | 0 |   |
| . | .  | .   | .   | .     | .     | .     | .    | 0                  | SOMGT:0:15 0/1:0 A | C             | 0 |   |
| . | .  | .   | .   | .     | .     | .     | .    | 0 0                | SOMGT:0/1:0:11 T   | C             | 0 |   |
| . | .  | .   | .   | .     | .     | .     | .    | 0 0                | SOMGT:0/1:0:13 G   | A             | 0 |   |
| . | .  | .   | .   | .     | .     | .     | .    | 0 0                | SOMGT:0/1:0:17 C   | T             | 0 |   |
| . | .  | .   | .   | .     | .     | .     | .    | .                  | SOMGT:0/1:0:19 G   | T             | 0 |   |
| . | .  | .   | .   | .     | .     | .     | .    | .                  | SOMGT:0/1:0:24 G   | A             | 0 |   |
| . | .  | .   | .   | .     | .     | .     | .    | 0                  | SOMGT:0/1:0:20 A   | C             | 0 |   |
| . | .  | .   | .   | .     | .     | 0.1   | 0.4  | DB;S               | GT:0/1:0:31 C      | T             | 0 |   |
| . | .  | .   | .   | .     | .     | .     | .    | 0                  | SOMGT:0/1:0:40 T   | C             | 0 |   |
| . | .  | .   | .   | .     | .     | .     | .    | 0 0.1              | SOMGT:0/1:0:15 C   | A             | 0 |   |
| . | .  | .   | .   | .     | .     | 0.3   | 0.4  | DB;S               | GT:0/1:0:20 C      | G             | 0 |   |
| . | .  | .   | .   | .     | .     | .     | .    | 0 0                | SOMGT:0/1:0:10 G   | A             | 0 |   |
| . | 0  | 0   | 0.0 | 1.0   | 1.0,D | 1.000 | 4.5  | 3.37               | DB;S               | GT:0/1:0:46 G | C | 0 |
| . | .  | .   | .   | .     | .     | .     | .    | 0                  | SOMGT:0/1:0:45 A   | C             | 0 |   |
| . | ## | 0   | .   | .     | .     | .     | .    | .                  | SOMGT:0/1:0:93 C   | T             | 0 |   |
| . | ## | 0   | 0.0 | 0.9   | 1.0,D | 1.000 | 4.8  | 3.42               | SOMGT:0/1:0:70 C   | T             | 0 |   |
| . | .  | .   | .   | .     | .     | .     | .    | 0 0                | SOMGT:0/1:0:8,(C   | T             | 0 |   |
| . | .  | .   | .   | .     | .     | .     | .    | .                  | SOMGT:0/1:0:45 G   | C             | 0 |   |
| . | .  | .   | .   | .     | .     | 0.3   | 0.5  | DB;S               | GT:0/1:0:19 T      | C             | 0 |   |
| . | .  | .   | .   | .     | .     | 0.3   | 0.4  | SOMGT:0/1:0:17 A   | C                  | 0             |   |   |
| . | .  | .   | .   | .     | .     | .     | .    | 0 0.1              | SOMGT:0/1:0:8,(T   | A             | 0 |   |
| . | .  | .   | .   | .     | .     | .     | .    | 0 0                | SOMGT:0/1:0:26 C   | A             | 0 |   |
| . | .  | .   | .   | .     | .     | .     | .    | 0 0                | SOMGT:0/1:0:9,(C   | A             | 0 |   |
| . | .  | .   | .   | .     | .     | .     | .    | .                  | SOMGT:0/1:0:53 T   | A             | 0 |   |
| . | .  | .   | .   | .     | .     | .     | .    | 0                  | SOMGT:0/1:0:28 A   | T             | 0 |   |
| . | .  | .   | .   | .     | .     | .     | .    | 0                  | SOMGT:0/1:0:45 C   | G             | 0 |   |
| . | .  | .   | .   | .     | .     | .     | .    | 0                  | SOMGT:0/1:0:10 G   | A             | 0 |   |
| . | .  | .   | .   | .     | .     | .     | .    | 0                  | SOMGT:0/1:0:8,(T   | A             | 0 |   |
| . | .  | .   | .   | .     | .     | .     | .    | .                  | SOMGT:0/1:0:43 G   | T             | 0 |   |
| . | .  | .   | .   | .     | .     | .     | .    | 0                  | SOMGT:0/1:0:8,(G   | C             | 0 |   |
| . | .  | .   | .   | .     | .     | .     | .    | 0 0                | SOMGT:0/1:0:11 G   | A             | 0 |   |
| . | .  | .   | .   | .     | .     | .     | .    | 0 0                | SOMGT:0/1:0:12 G   | A             | 0 |   |

|   |       |    |     |     |              |       |      |         |                     |   |   |
|---|-------|----|-----|-----|--------------|-------|------|---------|---------------------|---|---|
| . | .     | .  | .   | .   | .            | .     | .    | 0.      | SOMGT:/0/1:/0:43 T  | G | 0 |
| . | .     | .  | .   | .   | .            | .     | .    | 0 0.2   | SOMGT:/0/1:/0:12 T  | A | 0 |
| . | .     | .  | .   | .   | .            | .     | .    | 0 0     | SOMGT:/0/1:/0:10 T  | C | 0 |
| . | .     | .  | .   | .   | .            | .     | .    | 0 0     | SOMGT:/0/1:/0:10 A  | G | 0 |
| . | .     | .  | .   | .   | .            | .     | .    | .       | SOMGT:/0/1:/0:23 A  | C | 0 |
| . | .     | .  | .   | .   | .            | .     | .    | 0 0.1   | SOMGT:/0/1:/0:15 T  | C | 0 |
| . | .     | .  | .   | .   | .            | .     | .    | 0.2 0.5 | SOMGT:/0/1:/0:9,(A  | C | 0 |
| . | .     | .  | .   | .   | .            | .     | .    | .       | SOMGT:/0/1:/0:52 G  | C | 0 |
| . | .     | .  | .   | .   | .            | .     | .    | .       | SOMGT:/0/1:/0:8,(G  | A | 0 |
| . | .     | .  | .   | .   | .            | .     | .    | .       | SOMGT:/0/1:/0:69 G  | T | 0 |
| . | 0     | 0  | 0.0 | 0.1 | 0.4311,N     | 4.8   | 2.17 | 0.1     | SOMGT:/0/1:/0:9,(G  | A | 0 |
| . | .     | .  | .   | .   | .            | .     | .    | 0.      | SOMGT:/0/1:/0:33 G  | A | 0 |
| . | .     | .  | .   | .   | .            | .     | .    | 0 0     | SOMGT:/0/1:/0:37 A  | G | 0 |
| . | .     | .  | .   | .   | .            | .     | .    | .       | SOMGT:/0/1:/0:52 G  | T | 0 |
| . | .     | .  | .   | .   | .            | .     | .    | 0.      | SOMGT:/0/1:/0:14 A  | G | 0 |
| . | .     | .  | .   | .   | .            | .     | .    | .       | SOMGT:/0/1:/0:70 C  | T | 0 |
| . | .     | .  | .   | .   | .            | .     | .    | .       | SOMGT:/0/1:/0:10 T  | C | 0 |
| . | .     | .  | .   | .   | .            | .     | .    | .       | SOMGT:/0/1:/0:25 A  | T | 0 |
| . | .     | .  | .   | .   | .            | .     | .    | 0 0     | SOMGT:/0/1:/0:8,(C  | T | 0 |
| . | .     | .  | .   | .   | .            | .     | 3.9  | 0.      | SOMGT:/0/1:/0:12 C  | G | 0 |
| . | .     | .  | .   | .   | .            | .     | 1.88 | 0.      | SOMGT:/0/1:/0:20 T  | G | 0 |
| . | .     | .  | .   | .   | .            | .     | 2.5  | .       | SOMGT:/0/1:/0:25 G  | A | 0 |
| . | .     | .  | .   | .   | .            | .     | .    | 0.      | SOMGT:/0/1:/0:24 T  | G | 0 |
| . | .     | .  | .   | .   | .            | .     | .    | 0.      | SOMGT:/0/1:/0:23 T  | G | 0 |
| . | .     | .  | .   | .   | .            | .     | .    | 0 0.2   | SOMGT:/0/1:/0:14 G  | A | 0 |
| . | .     | .  | .   | .   | .            | .     | .    | 0 0.1   | SOMGT:/0/1:/0:10 A  | G | 0 |
| . | .     | .  | .   | .   | .            | .     | .    | .       | SOMGT:/0/1:/0:34 A  | G | 0 |
| . | .     | .  | .   | .   | .            | .     | .    | .       | SOMGT:/0/1:/0:57 C  | T | 0 |
| . | 4E-04 | 0  | 0   | .   | .            | .     | .    | 0.      | SOMGT:/0/1:/0:27 G  | A | 0 |
| . | .     | .  | .   | .   | .            | .     | .    | .       | SOMGT:/0/1:/0:32 G  | A | 0 |
| . | .     | .  | .   | .   | .            | .     | .    | 0 0     | SOMGT:/0/1:/0:23 C  | T | 0 |
| . | .     | .  | .   | .   | .            | .     | .    | 0.1 0.4 | SOMGT:/0/1:/0:9,(G  | T | 0 |
| . | .     | .  | .   | .   | .            | .     | .    | 0.      | SOMGT:/0/1:/0:20 T  | C | 0 |
| . | .     | .  | .   | .   | .            | .     | .    | 0.      | SOMGT:/0/1:/0:59 G  | A | 0 |
| . | .     | .  | .   | .   | .            | .     | .    | 0.      | SOMGT:/0/1:/0:18 A  | C | 0 |
| . | .     | .  | .   | .   | .            | .     | .    | .       | SOMGT:/0/1:/0:15 A  | G | 0 |
| . | .     | .  | 0.1 | 0.1 | 0.05, 0.695. | 1.65. | .    | .       | SOMGT:/0/1:/0:74 C  | A | 0 |
| . | .     | .  | .   | .   | .            | .     | .    | .       | SOMGT:/0/1:/0:45 C  | A | 0 |
| . | ##### | ## | 0   | .   | .            | .     | 2.1  | .       | SOMGT:/0/1:/0:75 T  | C | 0 |
| . | .     | .  | .   | .   | .            | .     | .    | 0.      | SOMGT:/0/1:/0:35 C  | G | 0 |
| . | .     | .  | .   | .   | .            | .     | .    | 0 0     | DB;/GT:/0/1:/0:59 A | G | 0 |
| . | .     | .  | .   | .   | .            | .     | .    | 0.      | DB;/GT:/0/1:/0:43 G | T | 0 |
| . | ##    | 0  | .   | .   | .            | .     | .    | .       | SOMGT:/0/1:/0:77 C  | T | 0 |
| . | .     | .  | .   | .   | .            | .     | .    | .       | SOMGT:/0/1:/0:24 A  | C | 0 |
| . | .     | .  | .   | .   | .            | .     | .    | 0.      | SOMGT:/0/1:/0:9,(G  | A | 0 |
| . | .     | .  | .   | .   | .            | .     | .    | .       | SOMGT:/0/1:/0:8,(A  | G | 0 |
| . | .     | .  | .   | .   | .            | .     | .    | 0.      | SOMGT:/0/1:/0:20 A  | C | 0 |
| . | .     | .  | .   | .   | .            | .     | .    | 0 0     | SOMGT:/0/1:/0:12 T  | A | 0 |
| . | .     | .  | .   | .   | .            | .     | .    | .       | SOMGT:/0/1:/0:8,(T  | G | 0 |
| . | .     | .  | .   | .   | .            | .     | .    | .       | SOMGT:/0/1:/0:46 C  | G | 0 |
| . | .     | .  | .   | .   | .            | .     | .    | .       | SOMGT:/0/1:/0:27 C  | G | 0 |
| . | .     | .  | .   | .   | .            | .     | .    | .       | SOMGT:/0/1:/0:18 C  | G | 0 |
| . | .     | .  | .   | .   | .            | .     | .    | .       | SOMGT:/0/1:/0:10 C  | A | 0 |
| . | .     | .  | .   | .   | .            | .     | .    | .       | SOMGT:/0/1:/0:20 G  | T | 0 |

|       |    |     |     |      |      |       |       |     |                     |                     |   |   |
|-------|----|-----|-----|------|------|-------|-------|-----|---------------------|---------------------|---|---|
| .     | .  | .   | .   | .    | .    | .     | .     | .   | SOMGT:/0/1:/0:23 C  | T                   | 0 |   |
| .     | .  | .   | .   | .    | .    | .     | .     | .   | SOMGT:/0/1:/0:23 A  | C                   | 0 |   |
| .     | .  | .   | .   | .    | .    | .     | .     | .   | DB;/GT:/0/1:/0:39 C | A                   | 0 |   |
| .     | .  | .   | .   | .    | .    | .     | 0.    | .   | DB;/GT:/0/1:/0:22 A | C                   | 0 |   |
| .     | .  | .   | .   | .    | .    | .     | 0     | 0.4 | SOMGT:/0/1:/0:8,(G  | T                   | 0 |   |
| .     | .  | .   | .   | .    | .    | .     | 0.    | .   | SOMGT:/0/1:/0:9,(G  | A                   | 0 |   |
| .     | .  | .   | .   | .    | .    | .     | 0     | 0   | DB;/GT:/0/1:/0:23 C | T                   | 0 |   |
| .     | .  | .   | .   | .    | .    | .     | 0.    | .   | SOMGT:/0/1:/0:9,(G  | A                   | 0 |   |
| .     | .  | .   | .   | .    | .    | .     | 0     | 0.1 | SOMGT:/0/1:/0:14 C  | G                   | 0 |   |
| .     | .  | .   | .   | .    | .    | 4.2   | 3.16. | .   | SOMGT:/0/1:/0:87 T  | C                   | 0 |   |
| .     | .  | .   | .   | .    | .    | 0.2   | 0.3   | .   | SOMGT:/0/1:/0:24 A  | C                   | 0 |   |
| .     | .  | .   | .   | .    | .    | .     | .     | .   | SOMGT:/0/1:/0:25 T  | G                   | 0 |   |
| .     | .  | .   | .   | .    | .    | .     | .     | .   | SOMGT:/0/1:/0:34 T  | G                   | 0 |   |
| .     | .  | .   | .   | .    | .    | .     | .     | .   | SOMGT:/0/1:/0:18 G  | A                   | 0 |   |
| .     | .  | .   | .   | .    | .    | .     | .     | .   | SOMGT:/0/1:/0:20 A  | G                   | 0 |   |
| .     | .  | .   | .   | .    | .    | .     | .     | .   | SOMGT:/0/1:/0:50 C  | G                   | 0 |   |
| .     | .  | .   | .   | .    | .    | .     | 0.    | .   | SOMGT:/0/1:/0:37 G  | C                   | 0 |   |
| .     | .  | .   | .   | .    | .    | .     | 0.    | .   | SOMGT:/0/1:/0:9,(C  | T                   | 0 |   |
| .     | .  | 0.0 | 0.9 | 0.99 | 1.00 | 4.8   | 4.21. | .   | DB;/GT:/0/1:/0:88 G | A                   | 0 |   |
| .     | 0  | 0.  | .   | .    | .    | .     | .     | 0   | 0                   | SOMGT:/0/1:/0:14 T  | G | 0 |
| .     | .  | .   | .   | .    | .    | .     | .     | .   | .                   | SOMGT:/0/1:/0:18 G  | A | 0 |
| .     | 0  | 0.  | .   | .    | .    | .     | .     | 0   | 0                   | DB;/GT:/0/1:/0:48 A | C | 0 |
| .     | .  | .   | .   | .    | .    | .     | 0.1   | 0.2 | DB;/GT:/0/1:/0:38 G | A                   | 0 |   |
| .     | .  | .   | .   | .    | .    | .     | 0     | 0.1 | SOMGT:/0/1:/0:8,(T  | C                   | 0 |   |
| .     | .  | .   | .   | .    | .    | .     | 0     | 0   | SOMGT:/0/1:/0:57 T  | C                   | 0 |   |
| .     | .  | .   | .   | .    | .    | 1.65  | 0.    | .   | SOMGT:/0/1:/0:26 C  | G                   | 0 |   |
| .     | .  | .   | .   | .    | .    | .     | .     | .   | SOMGT:/0/1:/0:37 T  | G                   | 0 |   |
| .     | .  | .   | .   | .    | .    | .     | 0     | 0   | SOMGT:/0/1:/0:8,(C  | T                   | 0 |   |
| .     | .  | .   | .   | .    | .    | .     | 0     | 0.2 | SOMGT:/0/1:/0:8,(T  | C                   | 0 |   |
| .     | .  | .   | .   | .    | .    | .     | 0.    | .   | SOMGT:/0/1:/0:16 G  | T                   | 0 |   |
| .     | .  | .   | .   | .    | .    | .     | 0.    | .   | SOMGT:/0/1:/0:13 T  | C                   | 0 |   |
| .     | .  | .   | .   | .    | .    | 2.5   | .     | .   | SOMGT:/0/1:/0:50 T  | C                   | 0 |   |
| .     | .  | .   | .   | .    | .    | .     | 0     | 0.1 | SOMGT:/0/1:/0:12 A  | G                   | 0 |   |
| .     | .  | .   | .   | .    | .    | .     | .     | .   | SOMGT:/0/1:/0:11 G  | A                   | 0 |   |
| 8E-04 | 0  | 0.  | .   | .    | .    | 2.28. | .     | .   | SOMGT:/0/1:/0:38 G  | A                   | 0 |   |
| .     | .  | .   | .   | .    | .    | .     | 0     | 0.1 | SOMGT:/0/1:/0:12 T  | C                   | 0 |   |
| .     | 1  | 1.  | .   | .    | .    | .     | 0.1   | 0.5 | SOMGT:/0/1:/0:41 C  | G                   | 0 |   |
| .     | .  | .   | .   | .    | .    | .     | 0.    | .   | SOMGT:/0/1:/0:23 T  | C                   | 0 |   |
| .     | .  | .   | .   | .    | .    | .     | 0.    | .   | SOMGT:/0/1:/0:24 G  | A                   | 0 |   |
| .     | .  | .   | .   | .    | .    | .     | 0.    | .   | SOMGT:/0/1:/0:8,(C  | T                   | 0 |   |
| .     | .  | .   | .   | .    | .    | .     | 0     | 0   | SOMGT:/0/1:/0:20 T  | C                   | 0 |   |
| .     | .  | 0.0 | 0.0 | 0.05 | 1,D  | 5.1   | 3.04. | .   | DB;/GT:/0/1:/0:39 G | T                   | 0 |   |
| .     | .  | .   | .   | .    | .    | .     | 0     | 0   | SOMGT:/0/1:/0:10 G  | A                   | 0 |   |
| .     | .  | .   | .   | .    | .    | 4.2   | 2.69  | 0.  | SOMGT:/0/1:/0:67 G  | A                   | 0 |   |
| .     | .  | .   | .   | .    | .    | .     | .     | .   | SOMGT:/0/1:/0:36 T  | G                   | 0 |   |
| .     | .  | .   | .   | .    | .    | .     | 0.    | .   | SOMGT:/0/1:/0:12 T  | C                   | 0 |   |
| .     | .  | 0.0 | 0.2 | 0.61 | 1,D  | 4.6   | 3.17. | .   | SOMGT:/0/1:/0:70 T  | C                   | 0 |   |
| .     | .  | .   | .   | .    | .    | 3.9   | 1.70  | 0   | 0                   | SOMGT:/0/1:/0:40 C  | T | 0 |
| .     | .  | .   | .   | .    | .    | .     | .     | .   | SOMGT:/0/1:/0:30 C  | T                   | 0 |   |
| ##### | ## | 0.  | .   | .    | .    | .     | .     | .   | SOMGT:/0/1:/0:17 G  | A                   | 0 |   |
| .     | .  | .   | .   | .    | .    | .     | 0     | 0   | DB;/GT:/0/1:/0:49 T | C                   | 0 |   |
| .     | .  | .   | .   | .    | .    | .     | .     | .   | SOMGT:/0/1:/0:8,(C  | T                   | 0 |   |
| .     | .  | .   | .   | .    | .    | .     | 0     | 0   | SOMGT:/0/1:/0:10 C  | T                   | 0 |   |
| .     | .  | .   | .   | .    | .    | .     | 0     | 0   | SOMGT:/0/1:/0:10 T  | C                   | 0 |   |



|  |  |     |     |       |                    |                       |   |   |
|--|--|-----|-----|-------|--------------------|-----------------------|---|---|
|  |  |     |     |       | SOMGT:/0/1:/0:19 G | T                     | 0 |   |
|  |  | 0.5 | 0.5 | 0.99  | 1,D 3.9 2.76       | SOMGT:/0/1:/0:92 G    | A | 0 |
|  |  |     |     |       | 0                  | SOMGT:/0/1:/0:20 A    | T | 0 |
|  |  |     |     |       |                    | SOMGT:/0/1:/0:29 C    | T | 0 |
|  |  |     |     |       | 0 0.1              | SOMGT:/0/1:/0:9,(C    | T | 0 |
|  |  |     |     |       |                    | SOMGT:/0/1:/0:22 C    | T | 0 |
|  |  |     |     |       | 0                  | SOMGT:/0/1:/0:27 A    | C | 0 |
|  |  |     |     |       |                    | SOMGT:/0/1:/0:75 G    | C | 0 |
|  |  |     |     |       | 0 0                | DB;SOMGT:/0/1:/0:38 T | C | 0 |
|  |  |     |     |       | 0.1 0.1            | DB;SOMGT:/0/1:/0:41 T | C | 0 |
|  |  |     |     |       |                    | SOMGT:/0/1:/0:38 G    | A | 0 |
|  |  |     |     |       |                    | SOMGT:/0/1:/0:11 G    | A | 0 |
|  |  |     |     |       | 0 0                | SOMGT:/0/1:/0:11 G    | A | 0 |
|  |  |     |     |       | 2.1                | SOMGT:/0/1:/0:39 A    | C | 0 |
|  |  |     |     |       | 2.12               | SOMGT:/0/1:/0:44 T    | A | 0 |
|  |  | 0.0 |     | 0.993 | 1.82               | SOMGT:/0/1:/0:20 C    | T | 0 |
|  |  |     |     |       | 0 0.5              | SOMGT:/0/1:/0:12 T    | G | 0 |
|  |  |     |     |       |                    | SOMGT:/0/1:/0:10 C    | G | 0 |
|  |  |     |     |       |                    | DB;SOMGT:/0/1:/0:34 T | C | 0 |
|  |  |     |     |       | 0 0                | SOMGT:/0/1:/0:13 G    | A | 0 |
|  |  |     |     |       | 0                  | SOMGT:/0/1:/0:8,(C    | T | 0 |
|  |  |     |     |       | 0                  | SOMGT:/0/1:/0:11 C    | T | 0 |
|  |  |     |     |       |                    | SOMGT:/0/1:/0:12 T    | C | 0 |
|  |  | 0 0 |     |       | 0                  | SOMGT:/0/1:/0:18 T    | C | 0 |
|  |  |     |     |       | 0                  | SOMGT:/0/1:/0:16 A    | T | 0 |
|  |  |     |     |       | 0                  | DB;SOMGT:/0/1:/0:54 C | T | 0 |
|  |  |     |     |       | 0                  | DB;SOMGT:/0/1:/0:58 G | A | 0 |
|  |  |     |     |       |                    | SOMGT:/0/1:/0:20 G    | A | 0 |
|  |  |     |     |       |                    | SOMGT:/0/1:/0:18 A    | T | 0 |
|  |  |     |     |       |                    | SOMGT:/0/1:/0:30 A    | G | 0 |
|  |  |     |     |       | 0                  | DB;SOMGT:/0/1:/0:35 A | G | 0 |
|  |  |     |     |       | 0                  | DB;SOMGT:/0/1:/0:46 G | A | 0 |
|  |  |     |     |       | 0 0.1              | DB;SOMGT:/0/1:/0:35 T | C | 0 |
|  |  |     |     |       | 0 0.2              | DB;SOMGT:/0/1:/0:35 C | T | 0 |
|  |  |     |     |       | 0 0                | DB;SOMGT:/0/1:/0:30 A | G | 0 |
|  |  |     |     |       | 0                  | DB;SOMGT:/0/1:/0:27 G | C | 0 |
|  |  |     |     |       |                    | DB;SOMGT:/0/1:/0:33 G | C | 0 |
|  |  |     |     |       | 0                  | DB;SOMGT:/0/1:/0:46 T | A | 0 |
|  |  |     |     |       | 0                  | SOMGT:/0/1:/0:39 C    | A | 0 |
|  |  |     |     |       | 0                  | DB;SOMGT:/0/1:/0:50 G | A | 0 |
|  |  |     |     |       |                    | SOMGT:/0/1:/0:11 C    | T | 0 |
|  |  |     |     |       | 0                  | SOMGT:/0/1:/0:9,(G    | A | 0 |
|  |  |     |     |       |                    | SOMGT:/0/1:/0:48 G    | A | 0 |
|  |  |     |     |       |                    | SOMGT:/0/1:/0:38 T    | C | 0 |
|  |  |     |     |       | 0                  | DB;SOMGT:/0/1:/0:38 G | A | 0 |
|  |  |     |     |       | 0                  | SOMGT:/0/1:/0:34 G    | A | 0 |
|  |  |     |     |       |                    | SOMGT:/0/1:/0:10 T    | A | 0 |
|  |  |     |     |       | 0                  | SOMGT:/0/1:/0:13 T    | G | 0 |
|  |  |     |     |       |                    | SOMGT:/0/1:/0:9,(G    | A | 0 |
|  |  |     |     |       | 0                  | SOMGT:/0/1:/0:13 C    | T | 0 |
|  |  | ##  | 0   |       |                    | SOMGT:/0/1:/0:46 G    | T | 0 |
|  |  |     |     |       | 0 0.2              | SOMGT:/0/1:/0:28 G    | A | 0 |
|  |  |     |     |       | 0                  | SOMGT:/0/1:/0:23 A    | T | 0 |
|  |  |     |     |       | 0                  | SOMGT:/0/1:/0:62 C    | G | 0 |

|       |    |   |     |      |             |                       |                   |   |   |
|-------|----|---|-----|------|-------------|-----------------------|-------------------|---|---|
|       |    |   |     |      |             | SOMGT:0/1:0:67 A      | T                 | 0 |   |
|       | 0  | 0 |     |      |             | SOMGT:0/1:0:27 G      | A                 | 0 |   |
|       |    |   |     |      |             | SOMGT:0/1:0:27 A      | C                 | 0 |   |
|       |    |   | 2.1 |      |             | DB;SOMGT:0/1:0:44 T   | A                 | 0 |   |
|       |    |   |     | 0    | 0           | SOMGT:0/1:0:10 G      | T                 | 0 |   |
|       |    |   |     | 0    |             | SOMGT:0/1:0:17 G      | A                 | 0 |   |
|       |    |   |     | 0    |             | SOMGT:0/1:0:16 C      | A                 | 0 |   |
|       |    |   |     | 0    |             | SOMGT:0/1:0:13 T      | A                 | 0 |   |
|       | 0  | 0 |     |      | 0           | 0 SOMGT:0/1:0:49 A    | G                 | 0 |   |
|       | 0  | 0 |     | 1.77 | 0           | 0 DB;SOMGT:0/1:0:37 C | T                 | 0 |   |
|       | 0  | 0 |     |      | 0           | 0 DB;SOMGT:0/1:0:27 G | A                 | 0 |   |
|       | 0  | 0 |     |      | 0           | 0 SOMGT:0/1:0:38 G    | A                 | 0 |   |
|       | 0  | 0 |     |      |             | SOMGT:0/1:0:58 C      | T                 | 0 |   |
|       |    |   |     | 0.3  | 0.4         | DB;SOMGT:0/1:0:23 A   | G                 | 0 |   |
|       |    |   |     | 0    | 0           | DB;SOMGT:0/1:0:43 T   | C                 | 0 |   |
|       |    |   |     | 0.1  | 0.2         | SOMGT:0/1:0:11 G      | A                 | 0 |   |
|       |    |   |     |      |             | SOMGT:0/1:0:9,(A      | T                 | 0 |   |
|       |    |   |     | 0    | 0           | SOMGT:0/1:0:8,(A      | G                 | 0 |   |
|       |    |   |     |      |             | SOMGT:0/1:0:39 T      | G                 | 0 |   |
|       |    |   |     | 0    | 0           | DB;SOMGT:0/1:0:33 C   | T                 | 0 |   |
|       |    |   |     | 0    | 0.1         | SOMGT:0/1:0:8,(G      | T                 | 0 |   |
|       |    |   |     | 0    | 0           | DB;SOMGT:0/1:0:33 C   | T                 | 0 |   |
|       |    |   |     | 0    | 0           | DB;SOMGT:0/1:0:22 T   | C                 | 0 |   |
|       |    |   |     | 0.1  | 0.3         | DB;SOMGT:0/1:0:36 C   | T                 | 0 |   |
|       |    |   |     | 0    | 0           | SOMGT:0/1:0:35 C      | A                 | 0 |   |
|       |    |   |     |      |             | SOMGT:0/1:0:24 G      | A                 | 0 |   |
|       |    |   | 3.1 | 1.73 |             | SOMGT:0/1:0:39 C      | T                 | 0 |   |
|       |    |   |     |      |             | SOMGT:0/1:0:51 G      | C                 | 0 |   |
|       |    |   |     |      |             | SOMGT:0/1:0:39 C      | T                 | 0 |   |
|       |    |   |     |      |             | SOMGT:0/1:0:38 T      | C                 | 0 |   |
|       |    |   |     | 0    |             | SOMGT:0/1:0:35 A      | G                 | 0 |   |
|       |    |   |     |      |             | SOMGT:0/1:0:15 A      | C                 | 0 |   |
|       |    |   | 0.2 | 0.0  | 0.0         | B 1.000 5.3           | SOMGT:0/1:0:38 C  | T | 0 |
|       |    |   |     |      |             | SOMGT:0/1:0:23 T      | A                 | 0 |   |
|       |    |   | 0.1 | 0.0  | 0.0011,N    |                       | SOMGT:0/1:0:71 G  | A | 0 |
|       |    |   |     | 0    | 0           | SOMGT:0/1:0:23 G      | A                 | 0 |   |
|       |    |   |     |      |             | SOMGT:0/1:0:16 C      | T                 | 0 |   |
|       |    |   |     | 0    | 0.1         | SOMGT:0:11 0/1: C     | T                 | 0 |   |
|       |    |   |     |      |             | SOMGT:0:43 0/1: C     | T                 | 0 |   |
| 0.006 | 0  | 0 |     | 1.30 |             | DB;SOMGT:0:22 0/1: C  | T                 | 0 |   |
|       |    |   | 0.4 | 0.0  | 0.089 1,N   | 1.28                  | SOMGT:0:15 0/1: G | A | 0 |
|       |    |   | 0.0 | 0.9  | 1.0,D 1.000 | 1.51                  | SOMGT:0:16 0/1: C | T | 0 |
|       |    |   |     |      |             | SOMGT:0:46 0/1: C     | T                 | 0 |   |
|       | ## | 0 |     |      |             | SOMGT:0:69 0/1: C     | T                 | 0 |   |
|       |    |   |     |      |             | SOMGT:0:79 0/1: G     | A                 | 0 |   |
|       |    |   | 0.2 | 0.0  | 0.84,1,N    | 2.7 1.91              | SOMGT:0:29 0/1: C | T | 0 |
|       | ## | 0 |     |      |             | SOMGT:0:51 0/1: C     | T                 | 0 |   |
|       |    |   |     |      |             | SOMGT:0:95 0/1: G     | A                 | 0 |   |
| ##### | ## | 0 |     |      |             | 0                     | SOMGT:0:12 0/1: C | T | 0 |
|       | ## | 0 |     |      |             |                       | SOMGT:0:31 0/1: G | A | 0 |
|       |    |   |     |      |             |                       | SOMGT:0:39 0/1: C | T | 0 |
|       |    |   |     |      |             |                       | SOMGT:0:19 0/1: C | T | 0 |
|       |    |   |     |      |             |                       | SOMGT:0:65 0/1: C | A | 0 |
|       |    |   |     |      |             |                       | SOMGT:0:23 0/1: G | A | 0 |

|       |    |                     |                    |      |          |     |                  |                     |   |   |
|-------|----|---------------------|--------------------|------|----------|-----|------------------|---------------------|---|---|
| .     | .  | .                   | .                  | .    | .        | .   | .                | SOMGT:0:77 0/1:G    | A | 0 |
| .     | .  | .                   | .                  | .    | .        | .   | .                | SOMGT:0:13 0/1:A    | G | 0 |
| .     | .  | .                   | .                  | .    | .        | .   | .                | SOMGT:0:28 0/1:C    | A | 0 |
| .     | .  | 0.1:0.9:1.0,D       | 0.992              | 5.5  | 4.01     | .   | .                | SOMGT:0:17 0/1:G    | T | 0 |
| .     | .  | .                   | .                  | .    | .        | .   | .                | SOMGT:0:29 0/1:G    | A | 0 |
| .     | .  | .                   | .                  | .    | .        | .   | .                | SOMGT:0:37 0/1:C    | T | 0 |
| .     | .  | 0.0:0.9:1.0,D       | 1.000              | 4.5  | 6.11     | .   | .                | SOMGT:0:98 0/1:C    | T | 0 |
| .     | .  | 0.0:0.9:0.997 1,D   | 4.8                | 4.48 | .        | .   | .                | SOMGT:0:57 0/1:C    | T | 0 |
| .     | .  | .                   | .                  | .    | .        | .   | .                | SOMGT:0:22 0/1:G    | A | 0 |
| .     | ## | 0                   | .                  | .    | 2.54     | .   | .                | SOMGT:0:12 0/1:C    | T | 0 |
| ##### | 0  | 0                   | .                  | .    | .        | .   | .                | SOMGT:0:22 0/1:C    | T | 0 |
| .     | .  | .                   | .                  | .    | .        | .   | .                | SOMGT:0:16 0/1:T    | A | 0 |
| .     | ## | 0                   | .                  | .    | 2 1.90   | .   | .                | SOMGT:0:69 0/1:C    | T | 0 |
| .     | .  | .                   | .                  | .    | .        | .   | .                | SOMGT:0:29 0/1:C    | T | 0 |
| ##### | ## | 0                   | 0.1:0.5:0.975 1,N  | 1.35 | .        | .   | .                | SOMGT:0:64 0/1:G    | A | 0 |
| .     | .  | .                   | .                  | .    | .        | .   | .                | SOMGT:0:42 0/1:C    | T | 0 |
| .     | .  | .                   | .                  | .    | .        | .   | .                | SOMGT:0:22 0/1:C    | T | 0 |
| .     | .  | .                   | .                  | .    | .        | .   | .                | SOMGT:0:17 0/1:A    | G | 0 |
| 0.005 | 0  | 0                   | .                  | .    | .        | .   | .                | DB;SOMGT:0:11 0/1:C | T | 0 |
| .     | .  | .                   | .                  | .    | 3 1.88   | .   | .                | SOMGT:0:33 0/1:C    | T | 0 |
| .     | .  | .                   | .                  | .    | 3.36     | .   | .                | SOMGT:0:11 0/1:G    | T | 0 |
| .     | .  | 0.8:0.994 1.000     | 6.1                | 4.05 | .        | .   | .                | SOMGT:0:35 0/1:C    | T | 0 |
| .     | .  | .                   | .                  | .    | 0        | 0   | SOMGT:0:65 0/1:G | C                   | 0 |   |
| .     | 0  | 0                   | .                  | .    | 0        | .   | .                | SOMGT:0:9,0/1:C     | T | 0 |
| .     | ## | 0                   | 0.3:0.3:0.975 1,N  | 2.01 | .        | .   | .                | DB;SOMGT:0:77 0/1:G | A | 0 |
| ##### | ## | 0                   | .                  | .    | .        | .   | .                | SOMGT:0:10 0/1:C    | T | 0 |
| .     | .  | 0.0:0.7:0.998 0.969 | 2.2                | 4.05 | .        | .   | .                | SOMGT:0:45 0/1:G    | A | 0 |
| 0.002 | 0  | 0                   | .                  | .    | .        | 0   | 0                | SOMGT:0:22 0/1:G    | A | 0 |
| .     | .  | .                   | .                  | .    | .        | 0   | 0.1              | SOMGT:0:22 0/1:C    | A | 0 |
| .     | .  | .                   | .                  | .    | .        | 0.1 | 0.2              | DB;SOMGT:0:23 0/1:T | C | 0 |
| .     | .  | .                   | .                  | .    | .        | 0.2 | 0.3              | DB;SOMGT:0:56 0/1:A | T | 0 |
| .     | .  | .                   | .                  | .    | .        | .   | .                | DB;SOMGT:0:24 0/1:G | A | 0 |
| .     | .  | .                   | .                  | .    | .        | 0   | 0                | DB;SOMGT:0:44 0/1:G | A | 0 |
| .     | ## | 0.0:0.0:0.065 1.000 | 4                  | 3.56 | .        | 0   | SOMGT:0:49 0/1:C | T                   | 0 |   |
| ##### | ## | 0                   | 0.0:0.5:0.98,0.999 | 4.7  | 2.17     | .   | .                | SOMGT:0:11 0/1:C    | T | 0 |
| 0.006 | 0  | 0                   | .                  | .    | .        | .   | .                | DB;SOMGT:0:47 0/1:G | A | 0 |
| .     | .  | .                   | .                  | .    | 1.26     | .   | .                | SOMGT:0:16 0/1:G    | A | 0 |
| .     | .  | .                   | .                  | .    | .        | .   | .                | SOMGT:0:46 0/1:A    | G | 0 |
| ##### | ## | 0                   | .                  | .    | 4.6 1.47 | .   | .                | SOMGT:0:36 0/1:C    | T | 0 |
| .     | .  | .                   | .                  | .    | 2.2      | .   | .                | SOMGT:0:82 0/1:G    | A | 0 |
| .     | .  | .                   | .                  | .    | .        | .   | .                | SOMGT:0:26 0/1:G    | A | 0 |
| .     | .  | .                   | .                  | .    | .        | .   | .                | SOMGT:0:68 0/1:C    | T | 0 |
| .     | .  | .                   | .                  | .    | .        | .   | .                | SOMGT:0:78 0/1:A    | G | 0 |
| .     | .  | .                   | .                  | .    | .        | 0   | .                | SOMGT:0:32 0/1:C    | T | 0 |
| .     | .  | 0.5:0.0:0.055 1,N   | .                  | .    | .        | .   | .                | SOMGT:0:23 0/1:C    | A | 0 |
| .     | .  | .                   | .                  | .    | 3        | .   | .                | SOMGT:0:10 0/1:G    | A | 0 |
| .     | .  | .                   | .                  | .    | 1.26     | .   | .                | SOMGT:0:49 0/1:G    | T | 0 |
| .     | .  | .                   | .                  | .    | .        | .   | .                | SOMGT:0:8,0/1:C     | T | 0 |
| .     | ## | 0                   | .                  | .    | .        | .   | .                | SOMGT:0:40 0/1:G    | A | 0 |
| .     | .  | .                   | .                  | .    | 1.51     | .   | .                | SOMGT:0:17 0/1:G    | T | 0 |
| .     | .  | .                   | .                  | .    | 1.49     | .   | .                | SOMGT:0:37 0/1:G    | A | 0 |
| .     | .  | .                   | .                  | .    | 2.5      | .   | .                | SOMGT:0:13 0/1:G    | A | 0 |
| .     | .  | .                   | .                  | .    | 2.4      | .   | .                | SOMGT:0:16 0/1:C    | T | 0 |
| .     | ## | 0                   | 0.0:0.0:0.006 1,N  | 3.5  | 1.43     | .   | .                | SOMGT:0:14 0/1:C    | T | 0 |



|       |                       |                     |           |       |                       |                     |   |   |
|-------|-----------------------|---------------------|-----------|-------|-----------------------|---------------------|---|---|
| ##    |                       |                     |           |       |                       | SOMGT:0:54 0/1:8 C  | T | 0 |
| ##    | 0 0.1:0.0:0.0010.99C  |                     | 1.97.     |       |                       | SOMGT:0:89 0/1:7 C  | T | 0 |
|       |                       |                     |           |       |                       | SOMGT:0:24 0/1:4 C  | A | 0 |
|       |                       |                     |           |       |                       | SOMGT:0:26 0/1:4 G  | T | 0 |
|       |                       |                     | 3.5.      |       |                       | SOMGT:0:71 0/1:7 G  | C | 0 |
| ##    | 0                     |                     | 1.40.     |       |                       | DB;8GT:0:48 0/1:8 G | A | 0 |
|       |                       |                     |           |       |                       | SOMGT:0:15 0/1:7 T  | A | 0 |
|       |                       |                     |           |       |                       | SOMGT:0:18 0/1:8 A  | T | 0 |
|       | 0.0:0.9:0.998 1,D     |                     | 5.6 1.99. |       |                       | SOMGT:0:48 0/1:7 A  | C | 0 |
|       |                       |                     |           |       |                       | SOMGT:0:10 0/1:7 C  | T | 0 |
|       |                       |                     |           | 0.    |                       | SOMGT:0:31 0/1:8 G  | A | 0 |
|       | 0.0:0.9:1.0,D 1,D     |                     | 4.9 4.51. |       |                       | SOMGT:0:11 0/1:7 C  | T | 0 |
|       |                       |                     |           |       |                       | SOMGT:0:56 0/1:8 T  | C | 0 |
|       |                       |                     | 1,A       |       | 3.27.                 | SOMGT:0:19 0/1:4 C  | T | 0 |
|       |                       |                     |           |       |                       | SOMGT:0:10 0/1:7 T  | C | 0 |
| ##    | 0 0.0:0.6:0.997 1.00C |                     | 4.1 3.60. |       |                       | SOMGT:0:96 0/1:7 C  | T | 0 |
|       |                       |                     | 5.4 2.78. |       |                       | SOMGT:0:10 0/1:7 G  | A | 0 |
|       | 0.0:1.0:1.0,D 1,D     |                     | 5.5 4.45. |       |                       | SOMGT:0:78 0/1:8 G  | T | 0 |
|       |                       |                     |           |       |                       | SOMGT:0:76 0/1:7 T  | G | 0 |
| ##### | ##                    | 0 0.0:0.9:1.0,D 1,D | 5.5 5.31. |       |                       | SOMGT:0:27 0/1:8 C  | T | 0 |
|       |                       |                     |           | 0.    |                       | SOMGT:0:60 0/1:7 G  | A | 0 |
|       |                       |                     |           |       |                       | SOMGT:0:14 0/1:8 G  | T | 0 |
|       |                       |                     |           |       |                       | SOMGT:0:17 0/1:8 C  | T | 0 |
|       |                       |                     |           |       |                       | SOMGT:0:11 0/1:7 C  | T | 0 |
|       |                       |                     | 2.2 2.04. |       |                       | SOMGT:0:34 0/1:8 A  | G | 0 |
|       |                       |                     |           |       |                       | SOMGT:0:17 0/1:8 T  | G | 0 |
| 0 0   |                       |                     |           | 0 0.1 | DB;8GT:0:72 0/1:7 T   | G                   | 0 |   |
|       |                       |                     |           |       | 0 DB;8GT:0:46 0/1:8 G | C                   | 0 |   |
|       |                       |                     |           |       | SOMGT:0:12 0/1:8 A    | G                   | 0 |   |
| ##    | 0                     |                     | 6.2 3.22. |       |                       | SOMGT:0:11 0/1:8 C  | T | 0 |
|       |                       |                     |           | 0.1   | DB;8GT:0:69 0/1:7 T   | A                   | 0 |   |
|       |                       |                     |           |       | SOMGT:0:48 0/1:8 C    | T                   | 0 |   |
|       |                       |                     | 4.9 3.57. |       |                       | SOMGT:0:51 0/1:8 C  | T | 0 |
|       |                       |                     |           |       |                       | SOMGT:0:13 0/1:7 G  | A | 0 |
|       |                       |                     |           |       |                       | SOMGT:0:33 0/1:8 G  | A | 0 |
|       |                       |                     |           |       |                       | SOMGT:0:88 0/1:7 C  | T | 0 |
|       |                       |                     |           |       |                       | DB;8GT:0:90 0/1:7 C | T | 0 |
|       |                       |                     | 1,D       |       | 5.5 10.0.             | SOMGT:0:62 0/1:7 G  | A | 0 |
|       | 0.0:0.9:0.998 1.00C   |                     | 6 3.34.   |       |                       | SOMGT:0:66 0/1:7 T  | C | 0 |
|       |                       |                     |           |       |                       | SOMGT:0:34 0/1:8 G  | A | 0 |
|       |                       |                     |           |       |                       | SOMGT:0:32 0/1:8 C  | T | 0 |
|       |                       |                     |           |       |                       | SOMGT:0:54 0/1:7 C  | T | 0 |
|       |                       |                     |           |       |                       | SOMGT:0:33 0/1:4 A  | G | 0 |
| ##    | 0 0.0:0.2:0.978 0.997 |                     | 3.8 3.72. |       |                       | SOMGT:0:53 0/1:7 G  | A | 0 |
|       |                       |                     | 1,D       |       | 4.3 3.54.             | SOMGT:0:10 0/1:7 C  | A | 0 |
|       |                       |                     |           |       | 1.74.                 | SOMGT:0:60 0/1:7 C  | T | 0 |
|       | 0.0:0.0:0.0,B 0.998   |                     | 4.2 2.12. |       |                       | SOMGT:0:57 0/1:8 C  | A | 0 |
|       |                       |                     | 1.62.     |       |                       | SOMGT:0:23 0/1:8 C  | A | 0 |
|       |                       |                     |           |       |                       | SOMGT:0:20 0/1:8 C  | T | 0 |
|       |                       |                     |           |       |                       | SOMGT:0:37 0/1:4 T  | C | 0 |
| ##    | 0 0.3:0.0:0.007 1,N   |                     |           | 0     | SOMGT:0:70 0/1:7 C    | T                   | 0 |   |
|       |                       |                     |           | 0     | 0 SOMGT:0:12 0/1:8 A  | G                   | 0 |   |
| ##    | 0                     |                     |           |       | SOMGT:0:42 0/1:8 G    | A                   | 0 |   |
| ##    | 0                     |                     |           |       | SOMGT:0:30 0/1:4 C    | T                   | 0 |   |

|       |    |     |     |       |       |       |      |      |                   |                  |   |   |
|-------|----|-----|-----|-------|-------|-------|------|------|-------------------|------------------|---|---|
| .     | .  | 0.0 | 0.9 | 1.0,D | 0.790 | 3.9   | 3.05 | .    | SOMGT:0:11 0/1:G  | A                | 0 |   |
| .     | ## | 0   | .   | .     | .     | 2.1   | .    | .    | SOMGT:0:16 0/1:C  | T                | 0 |   |
| .     | .  | 0.1 | 0.6 | 0.989 | 1,N   | 2.9   | 1.79 | .    | SOMGT:0:80 0/1:C  | A                | 0 |   |
| .     | .  | 0.1 | 0.7 | 0.958 | 1,D   | 6.1   | 3.94 | .    | SOMGT:0:72 0/1:A  | G                | 0 |   |
| .     | .  | .   | .   | .     | .     | .     | .    | .    | SOMGT:0:12 0/1:C  | T                | 0 |   |
| .     | .  | .   | .   | .     | .     | .     | .    | .    | SOMGT:0:15 0/1:G  | A                | 0 |   |
| .     | .  | .   | .   | .     | .     | .     | .    | .    | SOMGT:0:19 0/1:A  | G                | 0 |   |
| .     | .  | .   | .   | .     | .     | .     | .    | .    | SOMGT:0:25 0/1:C  | T                | 0 |   |
| .     | .  | .   | .   | .     | .     | .     | .    | .    | SOMGT:0:11 0/1:G  | A                | 0 |   |
| .     | .  | .   | .   | .     | .     | .     | .    | .    | SOMGT:0:34 0/1:T  | G                | 0 |   |
| .     | ## | 0   | .   | .     | .     | .     | .    | .    | SOMGT:0:61 0/1:C  | T                | 0 |   |
| .     | .  | .   | .   | 1,D   | .     | 5.4   | 3.73 | .    | SOMGT:0:10 0/1:C  | A                | 0 |   |
| .     | .  | .   | .   | .     | .     | .     | .    | .    | SOMGT:0:22 0/1:C  | T                | 0 |   |
| .     | .  | .   | .   | .     | .     | .     | .    | .    | DB;SGT:0:36 0/1:C | T                | 0 |   |
| .     | ## | 0   | 0   | 0.8   | 0.996 | 1,D   | 4.2  | 4.18 | SOMGT:0:45 0/1:G  | A                | 0 |   |
| .     | ## | 0   | 0.5 | 0.0   | 0.013 | 1,N   | .    | .    | SOMGT:0:10 0/1:G  | A                | 0 |   |
| .     | .  | 0.0 | 0.9 | 1.0,D | 0.967 | 4.8   | 4.07 | .    | SOMGT:0:69 0/1:G  | A                | 0 |   |
| .     | ## | 0   | 0.0 | 0.9   | 1.0,D | 1,D   | 5.6  | 4.70 | DB;SGT:0:70 0/1:C | T                | 0 |   |
| .     | .  | 0.0 | 0.6 | 0.976 | 1.000 | 5.1   | 2.99 | .    | SOMGT:0:27 0/1:C  | A                | 0 |   |
| .     | .  | .   | .   | .     | .     | .     | .    | .    | SOMGT:0:22 0/1:C  | T                | 0 |   |
| .     | .  | .   | .   | .     | .     | .     | .    | .    | SOMGT:0:39 0/1:A  | G                | 0 |   |
| ##### | ## | 0   | 0.0 | 0.9   | 1.0,D | 1.000 | 4    | 4.09 | 0                 | SOMGT:0:44 0/1:G | A | 0 |
| ##### | ## | .   | .   | .     | .     | 3.4   | .    | .    | .                 | SOMGT:0:60 0/1:C | T | 0 |
| ##### | ## | 0   | 1.0 | 0.0   | 0.027 | 0.972 | 2.8  | .    | .                 | SOMGT:0:19 0/1:G | A | 0 |
| .     | .  | .   | .   | .     | .     | 2.55  | .    | .    | .                 | SOMGT:0:20 0/1:G | T | 0 |
| .     | .  | .   | .   | .     | .     | .     | .    | .    | .                 | SOMGT:0:16 0/1:C | T | 0 |
| .     | .  | .   | .   | .     | .     | .     | .    | .    | .                 | SOMGT:0:53 0/1:C | T | 0 |
| .     | .  | .   | .   | .     | .     | .     | .    | .    | .                 | SOMGT:0:30 0/1:T | G | 0 |
| .     | .  | .   | .   | .     | .     | .     | .    | .    | .                 | SOMGT:0:11 0/1:G | A | 0 |
| .     | .  | .   | .   | .     | .     | .     | .    | .    | .                 | SOMGT:0:60 0/1:T | C | 0 |
| .     | .  | .   | .   | .     | .     | .     | .    | .    | .                 | SOMGT:0:20 0/1:C | G | 0 |
| .     | .  | .   | .   | .     | .     | .     | .    | .    | .                 | SOMGT:0:26 0/1:T | C | 0 |
| .     | .  | .   | .   | .     | .     | .     | .    | .    | .                 | SOMGT:0:61 0/1:C | T | 0 |
| .     | .  | 0.2 | 0.0 | 0.102 | 1,N   | .     | 3.19 | .    | .                 | SOMGT:0:12 0/1:C | T | 0 |
| .     | .  | 0.0 | 1.0 | 1.0,D | 1,D   | 6     | 3.50 | .    | .                 | SOMGT:0:32 0/1:G | T | 0 |
| .     | .  | .   | .   | .     | .     | 2.3   | .    | .    | .                 | SOMGT:0:57 0/1:A | G | 0 |
| .     | .  | .   | .   | .     | .     | .     | .    | .    | .                 | SOMGT:0:38 0/1:G | A | 0 |
| .     | .  | 0.0 | 0.6 | 0.976 | 0.982 | 3.2   | 1.82 | .    | .                 | SOMGT:0:13 0/1:T | C | 0 |
| .     | .  | .   | .   | .     | .     | .     | .    | .    | .                 | SOMGT:0:57 0/1:G | T | 0 |
| .     | ## | 0   | 0.2 | 0.0   | 0.021 | 0.998 | 2.30 | .    | .                 | SOMGT:0:73 0/1:C | T | 0 |
| .     | 0  | 0   | .   | .     | .     | .     | .    | .    | 0                 | SOMGT:0:18 0/1:C | T | 0 |
| .     | .  | .   | .   | 1,D   | .     | 6.1   | 4.56 | .    | .                 | SOMGT:0:54 0/1:G | T | 0 |
| .     | .  | .   | .   | .     | .     | 2.6   | .    | .    | .                 | SOMGT:0:88 0/1:C | T | 0 |
| .     | ## | 0   | 0.1 | 0.48  | 1.000 | 4.9   | 2.72 | 0    | .                 | SOMGT:0:40 0/1:G | T | 0 |
| .     | .  | 0.1 | 0.5 | 0.767 | 1.000 | 2.9   | 3.54 | .    | .                 | SOMGT:0:31 0/1:C | A | 0 |
| .     | .  | 0.0 | 0.2 | 0.274 | 1.000 | 5.8   | 3.31 | .    | .                 | SOMGT:0:52 0/1:T | G | 0 |
| .     | .  | .   | .   | .     | .     | .     | .    | .    | .                 | SOMGT:0:33 0/1:C | T | 0 |
| .     | .  | .   | .   | .     | .     | .     | .    | .    | .                 | SOMGT:0:60 0/1:G | A | 0 |
| .     | .  | 0.0 | 0.8 | 0.999 | 1,N   | .     | 2.96 | .    | .                 | SOMGT:0:19 0/1:G | A | 0 |
| .     | .  | .   | .   | .     | .     | .     | .    | .    | .                 | SOMGT:0:13 0/1:C | T | 0 |
| .     | .  | .   | .   | .     | .     | .     | .    | .    | .                 | SOMGT:0:68 0/1:G | A | 0 |
| .     | .  | 0.0 | 0.0 | 0.223 | 0.965 | 3.9   | 4.16 | .    | .                 | SOMGT:0:16 0/1:A | T | 0 |
| .     | .  | 0.0 | 1.0 | 1.0,D | 1,D   | 5.3   | 4.11 | .    | .                 | SOMGT:0:48 0/1:G | A | 0 |
| .     | .  | .   | .   | .     | .     | .     | .    | 0    | .                 | SOMGT:0:26 0/1:C | T | 0 |

|       |    |   |     |     |       |       |      |      |                    |                       |   |   |
|-------|----|---|-----|-----|-------|-------|------|------|--------------------|-----------------------|---|---|
|       |    |   |     |     |       |       |      | 0    | SOMGT:0:16 0/1:2 C | T                     | 0 |   |
| 3E-04 | 0  | 0 |     |     |       |       |      |      | SOMGT:0:46 0/1:3 C | T                     | 0 |   |
|       |    |   |     |     |       |       |      |      | SOMGT:0:34 0/1:3 C | T                     | 0 |   |
|       |    |   |     | 1,D | 6.1   | 4.95  |      |      | SOMGT:0:30 0/1:3 C | T                     | 0 |   |
|       |    |   |     |     |       |       |      |      | SOMGT:0:53 0/1:3 G | A                     | 0 |   |
| 0.001 | 0  | 0 |     |     |       |       |      |      | SOMGT:0:67 0/1:3 C | T                     | 0 |   |
|       | ## | 0 | 0.4 | 0.9 | 1.0,D | 1.000 | 3.6  | 3.57 | 0                  | SOMGT:0:47 0/1:3 C    | T | 0 |
| 3E-04 | 0  | 0 |     |     |       |       |      |      | SOMGT:0:30 0/1:3 G | A                     | 0 |   |
|       | ## | 0 |     |     |       |       |      |      | SOMGT:0:18 0/1:3 G | A                     | 0 |   |
|       |    |   | 0.0 | 0.2 | 0.617 | 1.000 | 3.9  | 3.19 |                    | SOMGT:0:18 0/1:3 A    | G | 0 |
|       | ## | 0 | 0.0 | 0.9 | 0.999 | 1,D   | 4.7  | 4.09 | 0                  | SOMGT:0:54 0/1:3 G    | A | 0 |
|       |    |   |     |     |       |       |      |      | SOMGT:0:73 0/1:3 T | C                     | 0 |   |
|       | ## | 0 | 0.0 | 0.9 | 1.0,D | 1,D   | 4.7  | 4.78 |                    | SOMGT:0:33 0/1:3 G    | A | 0 |
| ##### | ## | 0 | 0.0 | 0.8 | 0.998 | 1,D   | 5.5  | 3.85 |                    | SOMGT:0:59 0/1:3 C    | T | 0 |
|       |    |   |     |     |       |       |      |      | SOMGT:0:46 0/1:3 G | A                     | 0 |   |
|       |    |   |     |     |       |       | 2.1  | 1.37 |                    | SOMGT:0:17 0/1:2 C    | T | 0 |
| 2E-04 | ## | 0 |     |     |       |       | 3.1  |      |                    | SOMGT:0:28 0/1:3 C    | T | 0 |
| ##### | ## | 0 |     |     |       |       |      |      |                    | SOMGT:0:95 0/1:3 C    | T | 0 |
|       | ## | 0 | 0.0 | 0.9 | 1.0,D | 1,D   | 5.6  | 3.16 |                    | SOMGT:0:72 0/1:3 C    | T | 0 |
|       |    |   | 0.0 | 0.9 | 1.0,D | 1,D   | 5.2  | 6.08 |                    | SOMGT:0:92 0/1:3 G    | A | 0 |
|       |    |   |     |     |       |       |      |      |                    | SOMGT:0:34 0/1:3 G    | A | 0 |
|       | ## | 0 |     |     |       |       |      |      |                    | SOMGT:0:48 0/1:3 G    | A | 0 |
| 2E-04 | ## | 0 | 0.2 | 0.0 | 0.002 | 0.988 |      |      |                    | SOMGT:0:71 0/1:3 G    | A | 0 |
|       |    |   | 0.0 | 0.0 | 0.002 | 0.777 | 2.96 |      |                    | SOMGT:0:57 0/1:3 G    | A | 0 |
|       |    |   | 1.0 | 0.1 | 0.645 | 1,D   | 4.7  |      |                    | SOMGT:0:87 0/1:3 A    | T | 0 |
|       |    |   |     |     |       |       | 3    |      |                    | SOMGT:0:11 0/1:3 G    | A | 0 |
|       |    |   |     |     |       |       |      |      |                    | SOMGT:0:23 0/1:3 G    | A | 0 |
|       | ## | 0 | 0.0 | 0.9 | 0.999 | 1,D   | 5.6  | 5.41 | 0                  | SOMGT:0:34 0/1:3 G    | A | 0 |
|       |    |   |     |     |       |       |      |      |                    | SOMGT:0:17 0/1:2 G    | A | 0 |
|       |    |   |     |     |       |       |      |      |                    | SOMGT:0:19 0/1:3 A    | G | 0 |
|       |    |   | 0.1 | 0.0 | 0.005 | 1,D   | 5.3  | 3.98 |                    | SOMGT:0:50 0/1:3 C    | T | 0 |
|       | 0  | 0 |     |     |       |       |      |      |                    | DB;SOMGT:0:46 0/1:3 C | T | 0 |
|       |    |   |     |     |       |       | 2.4  |      |                    | SOMGT:0:11 0/1:3 T    | G | 0 |
|       |    |   |     |     |       |       | 3.2  |      |                    | SOMGT:0:41 0/1:3 T    | C | 0 |
|       |    |   |     |     |       |       |      |      |                    | SOMGT:0:34 0/1:3 C    | A | 0 |
|       |    |   |     |     |       |       |      |      |                    | SOMGT:0:27 0/1:2 C    | T | 0 |
|       |    |   | 0.6 | 0.0 | 0.02  | 0.992 | 5.6  | 1.44 |                    | SOMGT:0:81 0/1:3 C    | A | 0 |
|       |    |   |     |     |       |       | 5.2  | 2.70 |                    | SOMGT:0:39 0/1:3 T    | C | 0 |
|       | ## |   |     |     |       |       |      |      |                    | SOMGT:0:16 0/1:2 T    | C | 0 |
|       | ## | 0 |     |     |       |       |      |      |                    | SOMGT:0:29 0/1:3 C    | T | 0 |
|       |    |   |     |     |       |       | 2.3  | 1.51 |                    | SOMGT:0:21 0/1:2 T    | C | 0 |
|       |    |   |     |     |       |       |      |      |                    | SOMGT:0:24 0/1:2 C    | T | 0 |
|       |    |   |     |     |       |       |      |      |                    | SOMGT:0:16 0/1:3 A    | T | 0 |
|       |    |   |     |     |       |       | 1.28 |      |                    | SOMGT:0:18 0/1:2 A    | C | 0 |
|       |    |   | 0.2 | 0.0 | 0.094 | 0.932 | 4    |      |                    | SOMGT:0:48 0/1:3 C    | T | 0 |
|       |    |   |     |     |       |       |      |      |                    | SOMGT:0:22 0/1:3 A    | G | 0 |
|       |    |   |     |     |       |       |      |      |                    | SOMGT:0:52 0/1:3 C    | A | 0 |
|       |    |   |     |     |       |       |      |      |                    | SOMGT:0:72 0/1:3 C    | T | 0 |
|       |    |   |     |     |       |       |      |      |                    | SOMGT:0:58 0/1:3 C    | A | 0 |
|       | ## | 0 |     |     |       |       |      |      |                    | SOMGT:0:95 0/1:3 C    | T | 0 |
|       |    |   | 0.8 | 0.1 | 0.571 | 0.954 | 4.5  |      |                    | SOMGT:0:30 0/1:3 A    | G | 0 |
|       |    |   |     |     |       |       |      |      |                    | SOMGT:0:25 0/1:2 G    | A | 0 |
|       |    |   |     |     |       |       | 2.2  |      |                    | SOMGT:0:55 0/1:3 G    | A | 0 |
|       |    |   |     |     |       |       | 5    |      |                    | SOMGT:0:34 0/1:3 G    | T | 0 |

|       |    |   |     |     |             |      |      |                      |                   |   |   |
|-------|----|---|-----|-----|-------------|------|------|----------------------|-------------------|---|---|
|       |    |   |     |     |             |      |      | SOMGT:0:49 0/1:0T    | C                 | 0 |   |
|       |    |   |     |     |             |      |      | SOMGT:0:28 0/1:0C    | T                 | 0 |   |
|       |    |   |     |     |             | 1.67 |      | SOMGT:0:25 0/1:0A    | C                 | 0 |   |
|       |    |   |     |     |             | 0    |      | SOMGT:0:24 0/1:0G    | A                 | 0 |   |
|       |    |   |     |     |             | 0.2  | 0.5  | SOMGT:0:8,(0/1:0G    | A                 | 0 |   |
|       |    |   |     |     |             | 0.3  | 0.5  | SOMGT:0:9,(0/1:0G    | A                 | 0 |   |
| 2E-04 | ## | 0 |     |     |             | 2.1  | 3.65 | SOMGT:0:16 0/1:0C    | T                 | 0 |   |
|       |    |   |     |     |             | 1.49 |      | SOMGT:0:18 0/1:0T    | G                 | 0 |   |
|       |    |   |     |     |             |      |      | SOMGT:0:18 0/1:0T    | C                 | 0 |   |
|       |    |   |     |     |             | 0    |      | SOMGT:0:8,(0/1:0G    | A                 | 0 |   |
|       |    |   |     |     |             | 0    |      | SOMGT:0:10 0/1:0C    | A                 | 0 |   |
|       |    |   |     |     |             | 0.1  | 0.1  | DB;SOMGT:0:38 0/1:0G | A                 | 0 |   |
|       | 0  | 0 |     |     |             | 2.3  | 1.39 | SOMGT:0:63 0/1:0G    | A                 | 0 |   |
|       |    |   |     |     |             |      |      | SOMGT:0:61 0/1:0A    | G                 | 0 |   |
|       | ## | 0 |     |     |             |      |      | SOMGT:0:76 0/1:0C    | T                 | 0 |   |
|       |    |   |     |     |             | 3.4  | 1.32 | 0 SOMGT:0:43 0/1:0C  | T                 | 0 |   |
|       |    |   |     |     |             |      |      | SOMGT:0:45 0/1:0G    | A                 | 0 |   |
|       |    |   |     |     |             |      |      | SOMGT:0:70 0/1:0T    | C                 | 0 |   |
|       | 0  | 0 |     |     |             |      |      | SOMGT:0:14 0/1:0G    | A                 | 0 |   |
|       |    |   |     |     |             |      |      | SOMGT:0:46 0/1:0T    | C                 | 0 |   |
|       |    |   |     |     |             |      |      | SOMGT:0:30 0/1:0C    | A                 | 0 |   |
|       | ## | 0 | 0.0 | 0.9 | 1.0,D 1,D   | 5.7  | 5.60 | SOMGT:0:68 0/1:0C    | T                 | 0 |   |
|       |    |   | 0.7 | 0.0 | 0.003 1,N   |      |      | SOMGT:0:29 0/1:0G    | A                 | 0 |   |
|       | ## | 0 |     |     |             |      |      | SOMGT:0:60 0/1:0G    | A                 | 0 |   |
| 7E-04 | 0  | 0 | 1.0 | 0.0 | 0.002 1,N   | 2.3  |      | SOMGT:0:27 0/1:0C    | T                 | 0 |   |
|       | ## | 0 | 0.0 | 0.5 | 0.993 0.854 | 4    | 2.75 | SOMGT:0:42 0/1:0C    | T                 | 0 |   |
|       |    |   |     |     |             |      |      | SOMGT:0:46 0/1:0G    | A                 | 0 |   |
|       |    |   |     |     |             |      |      | SOMGT:0:18 0/1:0A    | G                 | 0 |   |
|       |    |   | 0.0 | 0.9 | 0.993 1.000 | 4.5  | 3.86 | SOMGT:0:58 0/1:0A    | G                 | 0 |   |
|       |    |   |     |     |             |      |      | SOMGT:0:91 0/1:0G    | A                 | 0 |   |
|       |    |   |     |     |             |      |      | SOMGT:0:68 0/1:0T    | C                 | 0 |   |
|       | ## | 0 |     |     |             |      |      | 0 SOMGT:0:37 0/1:0C  | T                 | 0 |   |
|       |    |   |     |     |             | 0    |      | SOMGT:0:35 0/1:0T    | A                 | 0 |   |
|       |    |   |     |     |             |      |      | SOMGT:0:24 0/1:0G    | A                 | 0 |   |
|       | 0  | 0 |     |     |             |      |      | SOMGT:0:62 0/1:0C    | T                 | 0 |   |
|       |    |   |     |     |             | 0.2  | 0    | DB;SOMGT:0:30 0/1:0G | C                 | 0 |   |
|       |    |   |     |     |             | 0    |      | SOMGT:0:19 0/1:0C    | T                 | 0 |   |
|       |    |   |     |     |             |      |      | SOMGT:0:9,(0/1:0A    | G                 | 0 |   |
|       |    |   |     |     |             |      |      | SOMGT:0:24 0/1:0C    | T                 | 0 |   |
|       |    |   |     |     |             |      |      | SOMGT:0:14 0/1:0C    | A                 | 0 |   |
|       |    |   | 0.6 | 0.4 | 0.976 0.993 | 5.4  |      | SOMGT:0:43 0/1:0G    | A                 | 0 |   |
|       |    |   |     |     |             | 1.25 |      | SOMGT:0:10 0/1:0G    | T                 | 0 |   |
|       |    |   |     |     |             |      |      | DB;SOMGT:0:44 0/1:0G | A                 | 0 |   |
|       |    |   |     |     |             | 0    |      | SOMGT:0:27 0/1:0C    | T                 | 0 |   |
|       |    |   |     |     |             | 3    |      | SOMGT:0:10 0/1:0A    | C                 | 0 |   |
|       | ## | 0 | 0.0 | 1.0 | 1.0,D 1,D   | 5.1  | 4.07 | SOMGT:0:56 0/1:0C    | T                 | 0 |   |
| ##### | ## | 0 | 0.1 | 0.0 | 0.157 0.993 | 5.6  | 3.15 | SOMGT:0:27 0/1:0G    | A                 | 0 |   |
|       |    |   |     |     |             | 3.88 |      | SOMGT:0:33 0/1:0G    | T                 | 0 |   |
|       |    |   |     |     |             | 1.43 |      | SOMGT:0:29 0/1:0C    | T                 | 0 |   |
|       |    |   |     |     |             |      |      | SOMGT:0:56 0/1:0G    | A                 | 0 |   |
|       |    |   |     |     |             |      |      | SOMGT:0:29 0/1:0T    | G                 | 0 |   |
|       |    |   |     |     |             |      |      | SOMGT:0:86 0/1:0G    | T                 | 0 |   |
|       |    |   |     |     |             | 3.5  | 1.73 | SOMGT:0:35 0/1:0A    | G                 | 0 |   |
|       |    |   |     |     |             | 1,A  | 3.6  | 5.01                 | SOMGT:0:39 0/1:0C | T | 0 |



|       |    |      |      |       |       |       |       |                     |                     |   |   |
|-------|----|------|------|-------|-------|-------|-------|---------------------|---------------------|---|---|
| .     | .  | .    | .    | .     | .     | .     | .     | SOMGT:0:21 0/1:2 T  | A                   | 0 |   |
| .     | .  | .    | .    | .     | .     | .     | .     | SOMGT:0:9,(0/1:2 G  | A                   | 0 |   |
| .     | .  | .    | .    | .     | 3.5   | 1.85. | .     | SOMGT:0:32 0/1:2 T  | C                   | 0 |   |
| .     | .  | .    | .    | .     | .     | 3.87. | .     | SOMGT:0:25 0/1:2 T  | C                   | 0 |   |
| .     | .  | .    | .    | .     | .     | .     | .     | SOMGT:0:13 0/1:2 G  | A                   | 0 |   |
| .     | .  | .    | .    | .     | .     | .     | .     | SOMGT:0:10 0/1:2 A  | T                   | 0 |   |
| .     | .  | .    | .    | .     | .     | .     | .     | SOMGT:0:8,(0/1:2 G  | A                   | 0 |   |
| .     | 0  | 0    | .    | .     | .     | .     | .     | SOMGT:0:21 0/1:2 T  | A                   | 0 |   |
| ##### | .  | 0.0  | 0.8  | 0.998 | 1,D   | 6     | 4.95. | SOMGT:0:77 0/1:2 C  | T                   | 0 |   |
| .     | .  | 1.0, | .    | 1,N   | .     | .     | .     | SOMGT:0:39 0/1:2 T  | C                   | 0 |   |
| .     | .  | 0.1! | .    | 1,N   | 2.8   | .     | .     | SOMGT:0:60 0/1:2 A  | G                   | 0 |   |
| .     | .  | .    | .    | .     | .     | 3.07. | .     | SOMGT:0:32 0/1:2 T  | C                   | 0 |   |
| .     | ## | .    | .    | .     | .     | .     | .     | SOMGT:0:23 0/1:2 G  | A                   | 0 |   |
| .     | ## | 0    | .    | .     | .     | .     | .     | SOMGT:0:80 0/1:2 C  | T                   | 0 |   |
| .     | .  | .    | .    | .     | 5.2   | 4.01. | .     | SOMGT:0:35 0/1:2 G  | A                   | 0 |   |
| .     | .  | 0.0  | 0.0  | 0.075 | 1,N   | 2.39. | .     | SOMGT:0:10 0/1:2 G  | A                   | 0 |   |
| .     | .  | 0.0  | 1.0  | 1.0,D | 1,D   | 4.12. | .     | DB;SGT:0:21 0/1:2 T | A                   | 0 |   |
| .     | .  | 0.0  | 0.9! | 1.0,D | 0.959 | 5.5   | 5.36. | SOMGT:0:81 0/1:2 C  | T                   | 0 |   |
| .     | .  | 0.0  | 0.9! | 0.986 | 1.000 | 5.4   | 4.37. | SOMGT:0:66 0/1:2 T  | C                   | 0 |   |
| .     | ## | 0    | .    | .     | .     | .     | .     | SOMGT:0:10 0/1:2 G  | A                   | 0 |   |
| .     | .  | .    | .    | .     | .     | 0     | 0     | SOMGT:0:12 0/1:2 T  | A                   | 0 |   |
| .     | ## | 0    | .    | .     | .     | .     | .     | SOMGT:0:74 0/1:2 A  | G                   | 0 |   |
| 6E-04 | 0  | 0    | .    | .     | .     | .     | .     | SOMGT:0:67 0/1:2 G  | A                   | 0 |   |
| .     | 0  | 0    | 0.0! | .     | 1,D   | 5.8   | 5.44. | SOMGT:0:64 0/1:2 G  | A                   | 0 |   |
| .     | .  | 0.2! | 0.0! | 0.001 | 1.000 | .     | .     | SOMGT:0:99 0/1:2 G  | C                   | 0 |   |
| .     | .  | .    | .    | .     | .     | .     | .     | SOMGT:0:18 0/1:2 C  | A                   | 0 |   |
| .     | .  | 0.0  | 0.9! | 1.0,D | 1.000 | 5.4   | 4.90. | SOMGT:0:49 0/1:2 G  | A                   | 0 |   |
| .     | .  | .    | .    | .     | .     | .     | .     | SOMGT:0:87 0/1:2 C  | T                   | 0 |   |
| .     | .  | .    | .    | .     | .     | .     | .     | SOMGT:0:57 0/1:2 A  | G                   | 0 |   |
| .     | .  | .    | .    | .     | .     | .     | .     | SOMGT:0:19 0/1:2 T  | C                   | 0 |   |
| .     | .  | .    | .    | .     | .     | .     | .     | SOMGT:0:35 0/1:2 G  | T                   | 0 |   |
| .     | .  | 0.0! | .    | .     | .     | 4.8   | 4.78. | SOMGT:0:46 0/1:2 A  | T                   | 0 |   |
| .     | .  | .    | .    | .     | .     | 2.9   | .     | SOMGT:0:32 0/1:2 C  | A                   | 0 |   |
| .     | .  | .    | .    | .     | .     | .     | .     | SOMGT:0:48 0/1:2 G  | T                   | 0 |   |
| .     | 0  | 0    | 0.0  | 0.0   | 0.0,B | 1,N   | .     | SOMGT:0:98 0/1:2 G  | A                   | 0 |   |
| .     | .  | .    | .    | .     | .     | 2.9   | .     | SOMGT:0:16 0/1:2 G  | T                   | 0 |   |
| ##### | ## | 0    | .    | .     | .     | .     | .     | SOMGT:0:66 0/1:2 G  | A                   | 0 |   |
| .     | .  | .    | .    | .     | .     | 2.7   | .     | SOMGT:0:61 0/1:2 G  | A                   | 0 |   |
| .     | ## | 0    | .    | .     | .     | .     | .     | SOMGT:0:67 0/1:2 C  | T                   | 0 |   |
| .     | 0  | 0    | .    | .     | .     | .     | 0     | SOMGT:0:80 0/1:2 C  | T                   | 0 |   |
| .     | .  | 0.0  | 0.2  | 0.171 | 1,D   | 6.2   | 2.79. | SOMGT:0:66 0/1:2 T  | A                   | 0 |   |
| .     | .  | .    | .    | .     | .     | .     | .     | SOMGT:0:87 0/1:2 C  | T                   | 0 |   |
| .     | .  | .    | .    | .     | .     | .     | .     | DB;SGT:0:33 0/1:2 A | T                   | 0 |   |
| 0.226 | 0  | 0    | .    | .     | .     | 2.16  | 0.4   | 0.4                 | DB;SGT:0:53 0/1:2 C | T | 0 |
| .     | ## | 0    | 0.0  | 0.9!  | 1.0,D | 0.979 | 3.3   | 2.52.               | SOMGT:0:13 0/1:2 G  | A | 0 |
| .     | .  | .    | .    | .     | .     | 5.3   | 2.55. | .                   | SOMGT:0:18 0/1:2 C  | A | 0 |
| .     | .  | .    | .    | .     | .     | .     | .     | .                   | SOMGT:0:15 0/1:2 G  | T | 0 |
| .     | .  | .    | .    | .     | .     | .     | .     | .                   | SOMGT:0:56 0/1:2 G  | A | 0 |
| ##### | ## | 0    | 0.0  | 0.9!  | 0.995 | 0.986 | 5.5   | 3.13.               | SOMGT:0:51 0/1:2 G  | A | 0 |
| .     | .  | .    | .    | .     | .     | .     | .     | .                   | SOMGT:0:8,(0/1:2 C  | T | 0 |
| .     | .  | .    | .    | .     | .     | .     | .     | .                   | SOMGT:0:63 0/1:2 C  | T | 0 |
| .     | .  | .    | .    | .     | .     | 2.8   | .     | .                   | SOMGT:0:37 0/1:2 C  | T | 0 |
| .     | .  | 0.0  | 0.9! | 1.0,D | 1,D   | 4.4   | 3.71. | SOMGT:0:51 0/1:2 C  | T                   | 0 |   |
| .     | .  | .    | .    | .     | .     | .     | .     | .                   | SOMGT:0:18 0/1:2 C  | T | 0 |

|       |    |   |     |     |       |       |      |      |   |                     |   |   |
|-------|----|---|-----|-----|-------|-------|------|------|---|---------------------|---|---|
| ##### | ## | 0 | .   | .   | .     | .     | .    | .    | . | SOMGT:0:30 0/1:G    | A | 0 |
| 0.013 | 0  | 0 | .   | .   | .     | .     | .    | .    | 0 | 0 SOMGT:0:10 0/1:C  | T | 0 |
| .     | .  | . | .   | .   | .     | .     | .    | .    | . | SOMGT:0:15 0/1:G    | T | 0 |
| .     | .  | . | .   | .   | .     | .     | .    | .    | . | SOMGT:0:20 0/1:C    | T | 0 |
| .     | .  | . | .   | .   | .     | 4.6   | 2.74 | .    | . | SOMGT:0:49 0/1:G    | A | 0 |
| ##### | ## | 0 | .   | .   | .     | 4.8   | 1.24 | .    | . | SOMGT:0:29 0/1:C    | T | 0 |
| .     | .  | . | .   | .   | .     | .     | .    | .    | . | SOMGT:0:8,(0/1:C    | T | 0 |
| .     | .  | . | .   | .   | .     | 2.21  | .    | .    | . | SOMGT:0:41 0/1:C    | T | 0 |
| .     | .  | . | .   | .   | .     | 2.5   | 1.28 | .    | . | SOMGT:0:14 0/1:G    | A | 0 |
| .     | .  | . | .   | .   | .     | .     | .    | .    | . | SOMGT:0:19 0/1:C    | T | 0 |
| .     | .  | . | .   | .   | .     | 4.1   | 2.41 | .    | . | SOMGT:0:48 0/1:T    | C | 0 |
| .     | ## | 0 | 0.0 | 0.9 | 1.0,D | 5.2   | 3.90 | 0    | . | SOMGT:0:27 0/1:C    | T | 0 |
| .     | .  | . | .   | .   | .     | 2.23  | .    | .    | . | SOMGT:0:21 0/1:C    | T | 0 |
| .     | .  | . | 0.0 | 0.9 | 1.0,D | 4.8   | 4.39 | .    | . | SOMGT:0:36 0/1:C    | T | 0 |
| .     | .  | . | .   | .   | .     | .     | .    | .    | . | SOMGT:0:19 0/1:G    | A | 0 |
| .     | .  | . | .   | .   | .     | .     | .    | .    | . | SOMGT:0:13 0/1:G    | A | 0 |
| .     | .  | . | .   | .   | .     | .     | .    | 0    | 0 | SOMGT:0:8,(0/1:C    | T | 0 |
| .     | .  | . | .   | .   | .     | .     | .    | .    | . | SOMGT:0:77 0/1:G    | T | 0 |
| .     | .  | . | .   | .   | .     | .     | .    | .    | . | SOMGT:0:16 0/1:C    | A | 0 |
| .     | .  | . | 0.0 | 0.9 | 1.0,D | 2.3   | 3.38 | .    | . | SOMGT:0:16 0/1:T    | A | 0 |
| .     | .  | . | .   | .   | .     | .     | .    | .    | . | SOMGT:0:31 0/1:T    | C | 0 |
| .     | .  | . | .   | .   | .     | 3.8   | 1.28 | .    | . | SOMGT:0:26 0/1:G    | T | 0 |
| .     | .  | . | .   | .   | .     | 2.1   | .    | .    | . | SOMGT:0:40 0/1:G    | A | 0 |
| .     | .  | . | .   | .   | .     | 1.31  | .    | .    | . | SOMGT:0:39 0/1:C    | T | 0 |
| .     | .  | . | .   | .   | .     | .     | .    | .    | . | SOMGT:0:20 0/1:A    | G | 0 |
| .     | ## | 0 | .   | .   | .     | .     | .    | .    | . | SOMGT:0:22 0/1:A    | G | 0 |
| 2E-04 | ## | 0 | 0.3 | 0.0 | 0.003 | 1.000 | 5.4  | 1.35 | . | DB;SOMGT:0:74 0/1:G | A | 0 |
| .     | .  | . | .   | .   | .     | .     | .    | .    | . | SOMGT:0:26 0/1:C    | T | 0 |
| .     | ## | 0 | .   | .   | .     | .     | .    | 0    | . | SOMGT:0:62 0/1:C    | T | 0 |
| .     | .  | . | .   | .   | .     | .     | .    | .    | . | SOMGT:0:45 0/1:G    | T | 0 |
| .     | ## | 0 | 0.5 | 0.0 | 0.002 | 1,N   | .    | 0    | 0 | SOMGT:0:17 0/1:G    | A | 0 |
| .     | .  | . | .   | .   | .     | .     | .    | .    | . | SOMGT:0:56 0/1:G    | A | 0 |
| .     | .  | . | .   | .   | .     | .     | .    | .    | . | SOMGT:0:9,(0/1:T    | C | 0 |
| 2E-04 | ## | 0 | .   | .   | .     | .     | .    | .    | . | SOMGT:0:36 0/1:G    | A | 0 |
| .     | .  | . | .   | .   | .     | 2.3   | .    | .    | . | SOMGT:0:30 0/1:C    | T | 0 |
| .     | ## | 0 | .   | .   | .     | .     | .    | .    | . | SOMGT:0:63 0/1:G    | A | 0 |
| .     | .  | . | .   | .   | .     | .     | .    | .    | . | SOMGT:0:49 0/1:G    | A | 0 |
| .     | ## | 0 | 0.1 | 0.9 | 0.995 | 1,D   | 5    | 3.50 | . | SOMGT:0:10 0/1:G    | A | 0 |
| .     | .  | . | .   | .   | .     | .     | .    | 0    | . | SOMGT:0:21 0/1:G    | A | 0 |
| .     | .  | . | .   | .   | .     | 2     | .    | .    | . | SOMGT:0:47 0/1:G    | A | 0 |
| .     | 0  | 0 | 0.0 | 0.0 | 0.022 | 0.995 | 2.9  | 2.38 | . | SOMGT:0:15 0/1:C    | T | 0 |
| .     | ## | 0 | .   | .   | .     | .     | .    | 0    | . | SOMGT:0:16 0/1:G    | A | 0 |
| ##### | ## | 0 | 1.0 | 0.0 | 0.608 | 0.982 | 3.6  | .    | . | SOMGT:0:64 0/1:C    | T | 0 |
| .     | .  | . | 0.0 | 1.0 | 1.0,D | 1.000 | 5.3  | 3.33 | . | SOMGT:0:10 0/1:C    | T | 0 |
| .     | ## | 0 | .   | .   | .     | .     | .    | 0    | 0 | SOMGT:0:12 0/1:C    | T | 0 |
| .     | .  | . | 0.0 | 0.8 | 0.995 | 0.995 | 2.3  | 4.32 | . | SOMGT:0:10 0/1:G    | A | 0 |
| .     | .  | . | .   | .   | .     | 1,A   | 6.60 | .    | . | SOMGT:0:12 0/1:C    | T | 0 |
| .     | .  | . | .   | .   | .     | 2.8   | .    | .    | . | SOMGT:0:31 0/1:G    | T | 0 |
| .     | ## | 0 | 0.1 | 0.6 | 0.985 | 1.000 | 5.1  | 4.02 | . | SOMGT:0:15 0/1:C    | T | 0 |
| 7E-04 | 0  | 0 | .   | .   | .     | .     | .    | .    | . | SOMGT:0:72 0/1:G    | A | 0 |
| .     | .  | . | .   | .   | .     | .     | .    | .    | . | SOMGT:0:52 0/1:A    | G | 0 |
| .     | ## | 0 | 0.0 | 1.0 | 1.0,D | 1,D   | 4.4  | 4.28 | . | SOMGT:0:82 0/1:G    | A | 0 |
| .     | .  | . | .   | .   | .     | 1,D   | 4.5  | 3.79 | . | DB;SOMGT:0:26 0/1:A | G | 0 |
| .     | .  | . | .   | .   | .     | .     | .    | .    | . | SOMGT:0:38 0/1:G    | A | 0 |

|       |    |                       |       |       |   |           |     |                      |   |   |
|-------|----|-----------------------|-------|-------|---|-----------|-----|----------------------|---|---|
| .     | .  | .                     | .     | .     | . | 2.42.     | .   | SOMGT:0:20 0/1:z A   | G | 0 |
| .     | .  | .                     | .     | .     | . | .         | .   | SOMGT:0:12 0/1:z C   | T | 0 |
| .     | .  | .                     | .     | .     | . | .         | .   | SOMGT:0:27 0/1:z C   | T | 0 |
| .     | .  | .                     | .     | .     | . | .         | .   | SOMGT:0:24 0/1:z A   | T | 0 |
| .     | .  | 0.1:0.9:0.99E 1.00C   | 5.6   | 5.03. | . | .         | .   | SOMGT:0:66 0/1:z T   | G | 0 |
| .     | .  | 0.9:0.3:0.58,0.99E    | 5.4   | 1.88. | . | .         | .   | SOMGT:0:55 0/1:z C   | T | 0 |
| .     | .  | .                     | .     | .     | . | .         | .   | DB;S GT:0:20 0/1:z C | T | 0 |
| .     | .  | .                     | .     | .     | . | .         | .   | DB;S GT:0:36 0/1:z T | C | 0 |
| .     | .  | .                     | .     | .     | . | .         | .   | SOMGT:0:36 0/1:z T   | C | 0 |
| .     | .  | .                     | .     | .     | . | .         | .   | SOMGT:0:13 0/1:z G   | A | 0 |
| .     | .  | .                     | .     | .     | . | 1.48.     | .   | SOMGT:0:67 0/1:z C   | A | 0 |
| .     | .  | .                     | .     | .     | . | .         | .   | SOMGT:0:61 0/1:z G   | T | 0 |
| .     | .  | .                     | .     | .     | . | 4.2 2.40. | .   | SOMGT:0:54 0/1:z G   | T | 0 |
| .     | ## | 0                     | .     | .     | . | 2.23.     | .   | SOMGT:0:98 0/1:z C   | T | 0 |
| .     | .  | 0.5:0.0:0.0,B 1,N     | .     | .     | . | .         | .   | SOMGT:0:10 0/1:z A   | G | 0 |
| .     | .  | 0.0:0.9:0.99E 1.00C   | 5.9   | 3.83. | . | .         | .   | SOMGT:0:76 0/1:z C   | T | 0 |
| .     | ## | 0                     | .     | .     | . | 2.        | .   | SOMGT:0:29 0/1:z C   | T | 0 |
| .     | .  | 0.3:0.1:0.57E 0.907   | 5.    | .     | . | .         | .   | SOMGT:0:25 0/1:z G   | A | 0 |
| .     | .  | .                     | .     | .     | . | .         | .   | SOMGT:0:20 0/1:z A   | G | 0 |
| .     | .  | .                     | .     | .     | . | .         | .   | SOMGT:0:46 0/1:z G   | T | 0 |
| .     | .  | .                     | .     | .     | . | 2.2 4.04  | 0.  | SOMGT:0:24 0/1:z C   | T | 0 |
| .     | .  | .                     | .     | .     | . | 2.5.      | .   | SOMGT:0:28 0/1:z G   | T | 0 |
| .     | .  | .                     | .     | .     | . | .         | .   | SOMGT:0:44 0/1:z A   | C | 0 |
| .     | .  | .                     | .     | .     | . | .         | .   | SOMGT:0:31 0/1:z C   | A | 0 |
| ##### | ## | 0 0.0:0.5:0.99E 1.00C | 5.5   | 4.81. | . | .         | .   | SOMGT:0:28 0/1:z G   | A | 0 |
| .     | .  | .                     | .     | .     | . | 2.7.      | .   | SOMGT:0:20 0/1:z G   | A | 0 |
| .     | .  | .                     | .     | .     | . | .         | .   | SOMGT:0:25 0/1:z G   | A | 0 |
| .     | .  | .                     | .     | .     | . | 3.2.      | .   | SOMGT:0:79 0/1:z C   | A | 0 |
| .     | 0  | 0                     | .     | .     | . | .         | 0 0 | SOMGT:0:55 0/1:z G   | A | 0 |
| .     | ## | 0                     | .     | .     | . | 2.6 1.42. | .   | SOMGT:0:12 0/1:z G   | A | 0 |
| .     | .  | .                     | .     | .     | . | .         | .   | SOMGT:0:26 0/1:z A   | G | 0 |
| .     | .  | .                     | .     | .     | . | .         | .   | SOMGT:0:40 0/1:z C   | T | 0 |
| .     | .  | .                     | .     | .     | . | 3.01.     | .   | SOMGT:0:25 0/1:z A   | G | 0 |
| .     | .  | 0.0:0.9:0.99E 1,D     | 3.7   | 4.27. | . | .         | .   | SOMGT:0:74 0/1:z G   | A | 0 |
| .     | .  | .                     | .     | .     | . | .         | .   | SOMGT:0:58 0/1:z C   | A | 0 |
| .     | .  | 0.0:0.9:0.99E 1,N     | 1.53. | .     | . | .         | .   | SOMGT:0:35 0/1:z G   | A | 0 |
| .     | .  | .                     | .     | .     | . | .         | .   | SOMGT:0:94 0/1:z C   | T | 0 |
| ##### | ## | 0                     | .     | .     | . | .         | .   | SOMGT:0:31 0/1:z C   | T | 0 |
| .     | .  | .                     | .     | .     | . | 4.6.      | .   | SOMGT:0:56 0/1:z G   | A | 0 |
| .     | .  | .                     | .     | .     | . | .         | .   | SOMGT:0:10 0/1:z C   | T | 0 |
| 0.016 | 0  | 0                     | .     | .     | . | .         | 0 0 | DB;S GT:0:20 0/1:z A | T | 0 |
| .     | ## | 0 0.1:0.0:0.10E 1.00C | 3.9   | 3.82. | . | .         | .   | SOMGT:0:31 0/1:z C   | T | 0 |
| .     | .  | .                     | .     | .     | . | .         | .   | SOMGT:0:46 0/1:z G   | A | 0 |
| .     | .  | .                     | .     | .     | . | .         | .   | SOMGT:0:42 0/1:z C   | T | 0 |
| .     | ## | 0                     | .     | .     | . | 3.2.      | 0.  | SOMGT:0:62 0/1:z C   | T | 0 |
| .     | .  | .                     | .     | .     | . | .         | .   | SOMGT:0:9,(0/1:z C   | A | 0 |
| .     | .  | .                     | .     | .     | . | 6.1 2.79. | .   | SOMGT:0:22 0/1:z G   | A | 0 |
| .     | .  | .                     | .     | .     | . | .         | .   | SOMGT:0:98 0/1:z G   | A | 0 |
| .     | .  | .                     | .     | .     | . | .         | .   | SOMGT:0:9,(0/1:z G   | C | 0 |
| .     | ## | 0 0.0:0.9:1.0,D 1.00C | 6.1   | 4.63. | . | .         | .   | SOMGT:0:38 0/1:z C   | T | 0 |
| .     | .  | .                     | .     | .     | . | .         | .   | SOMGT:0:9,(0/1:z G   | A | 0 |
| .     | .  | .                     | .     | .     | . | 1.54.     | .   | SOMGT:0:34 0/1:z G   | T | 0 |
| .     | ## | 0                     | .     | .     | . | .         | .   | SOMGT:0:47 0/1:z C   | T | 0 |
| .     | .  | .                     | .     | .     | . | .         | 0   | SOMGT:0:27 0/1:z C   | T | 0 |

|       |     |                       |  |      |      |         |                      |   |   |
|-------|-----|-----------------------|--|------|------|---------|----------------------|---|---|
|       |     |                       |  | 5.6  |      |         | SOMGT:0:82 0/1: T    | G | 0 |
|       |     | 0.2:0.4:0.836 1.000   |  | 5.7  | 4.22 |         | SOMGT:0:10 0/1: C    | T | 0 |
|       |     |                       |  |      |      |         | SOMGT:0:59 0/1: C    | T | 0 |
|       |     |                       |  |      |      |         | SOMGT:0:60 0/1: C    | C | 0 |
| ##### | ##  | 0 0.8:0.0:0.083 1,D   |  | 5.1  |      |         | SOMGT:0:63 0/1: G    | A | 0 |
|       |     |                       |  |      |      |         | SOMGT:0:39 0/1: T    | A | 0 |
|       | ##  | 0                     |  | 1.48 |      |         | SOMGT:0:54 0/1: C    | T | 0 |
|       | ##  | 0                     |  | 2.5  |      |         | SOMGT:0:33 0/1: G    | A | 0 |
|       |     |                       |  |      |      |         | SOMGT:0:24 0/1: C    | T | 0 |
|       |     |                       |  |      |      | 0 0     | SOMGT:0:10 0/1: C    | T | 0 |
|       |     |                       |  | 3.1  |      |         | SOMGT:0:43 0/1: C    | T | 0 |
|       |     |                       |  |      |      |         | SOMGT:0:51 0/1: C    | T | 0 |
|       |     |                       |  |      |      | 0       | SOMGT:0:9,(0/1: G    | A | 0 |
|       |     |                       |  |      |      | 0 0     | DB;SOMGT:0:75 0/1: A | G | 0 |
|       |     |                       |  |      |      |         | SOMGT:0:8,(0/1: G    | T | 0 |
|       | ##  | 0 0.0:0.9:1.0,D 0.799 |  | 3.3  | 1.95 | 0 0     | SOMGT:0:80 0/1: G    | A | 0 |
|       |     |                       |  |      |      |         | SOMGT:0:79 0/1: C    | A | 0 |
|       |     |                       |  |      |      |         | SOMGT:0:45 0/1: C    | T | 0 |
|       |     |                       |  |      |      | 0       | SOMGT:0:43 0/1: C    | T | 0 |
|       |     |                       |  |      |      |         | SOMGT:0:70 0/1: G    | A | 0 |
|       |     |                       |  |      |      |         | SOMGT:0:19 0/1: G    | A | 0 |
|       |     |                       |  |      |      |         | SOMGT:0:68 0/1: T    | C | 0 |
|       |     |                       |  |      |      |         | SOMGT:0:16 0/1: G    | A | 0 |
|       |     |                       |  |      |      |         | SOMGT:0:10 0/1: G    | A | 0 |
|       |     |                       |  | 1,D  | 3.49 |         | SOMGT:0:9,(0/1: C    | T | 0 |
| 5E-04 | 0 0 |                       |  |      |      |         | DB;SOMGT:0:14 0/1: C | T | 0 |
|       |     |                       |  |      |      |         | SOMGT:0:14 0/1: G    | A | 0 |
|       |     |                       |  | 1.69 |      |         | SOMGT:0:72 0/1: G    | A | 0 |
|       | ##  | 0 0.2:0.0:0.004 1,D   |  | 4.1  | 1.85 |         | SOMGT:0:35 0/1: G    | A | 0 |
|       | 0 0 |                       |  |      |      | 0 0     | SOMGT:0:36 0/1: C    | T | 0 |
|       | ##  | 0                     |  |      |      |         | SOMGT:0:12 0/1: C    | T | 0 |
|       |     | 0.0:0.9:1.0,D 0.996   |  | 6.2  | 4.57 |         | SOMGT:0:62 0/1: G    | A | 0 |
|       |     | 0.0:0.5:0.959 0.687   |  | 3.7  | 1.42 |         | SOMGT:0:60 0/1: C    | A | 0 |
|       |     | 0.0:1.0,1.0,D 1,D     |  | 5.4  | 4.96 |         | SOMGT:0:59 0/1: G    | A | 0 |
|       |     |                       |  |      |      |         | SOMGT:0:31 0/1: A    | T | 0 |
|       |     | 0.1:0.9:0.994 0.879   |  | 5.6  | 3.33 |         | SOMGT:0:40 0/1: T    | C | 0 |
|       |     |                       |  |      |      | 0 0     | SOMGT:0:8,(0/1: A    | G | 0 |
|       | ##  | 0                     |  | 2.2  | 2.78 |         | SOMGT:0:20 0/1: C    | T | 0 |
|       |     |                       |  |      |      |         | SOMGT:0:55 0/1: C    | T | 0 |
|       |     |                       |  | 1.70 |      |         | SOMGT:0:27 0/1: G    | T | 0 |
|       | ##  | 0 0.0:0.9:0.998 1,D   |  | 5.9  | 5.07 |         | SOMGT:0:67 0/1: G    | A | 0 |
|       |     | 0.2:0.1:0.475 0.999   |  | 4.1  | 2.31 |         | SOMGT:0:56 0/1: A    | T | 0 |
|       |     |                       |  |      |      |         | DB;SOMGT:0:37 0/1: C | T | 0 |
|       |     |                       |  |      |      | 0.1 0.2 | SOMGT:0:20 0/1: C    | T | 0 |
|       |     |                       |  |      |      | 0       | SOMGT:0:8,(0/1: C    | T | 0 |
|       |     | 0.1:0.0:0.127 1,N     |  | 1.50 |      |         | SOMGT:0:14 0/1: C    | T | 0 |
|       |     |                       |  | 1.36 |      |         | SOMGT:0:13 0/1: C    | T | 0 |
|       |     |                       |  |      |      |         | SOMGT:0:69 0/1: G    | C | 0 |
|       |     |                       |  |      |      |         | SOMGT:0:9,(0/1: C    | A | 0 |
|       |     |                       |  |      |      |         | SOMGT:0:18 0/1: G    | A | 0 |
|       |     |                       |  | 1,A  | 5.21 |         | SOMGT:0:17 0/1: C    | T | 0 |
|       |     |                       |  | 3.8  |      |         | SOMGT:0:30 0/1: A    | T | 0 |
|       | ##  | 0                     |  |      |      |         | SOMGT:0:27 0/1: C    | T | 0 |
|       |     |                       |  | 1,D  | 5.6  | 4.33    | SOMGT:0:44 0/1: C    | T | 0 |

|       |    |   |     |           |       |       |      |      |         |         |         |         |        |   |   |   |
|-------|----|---|-----|-----------|-------|-------|------|------|---------|---------|---------|---------|--------|---|---|---|
| 0     | 0  |   |     |           |       | 0     | 0    | DB;S | GT:0:20 | 0/1:4   | T       | A       | 0      |   |   |   |
|       |    |   |     |           |       |       |      |      | SOM     | GT:0:14 | 0/1:7   | G       | T      | 0 |   |   |
| ##### | 0  | 0 | 0.0 | 1.0,1.0,D | 1.00C | 3.9   | 3.90 |      | SOM     | GT:0:49 | 0/1:7   | C       | T      | 0 |   |   |
|       |    |   |     |           |       | 4.7   | 1.51 |      | SOM     | GT:0:73 | 0/1:7   | G       | T      | 0 |   |   |
|       | ## | 0 | 0.0 | 0.9       | 1.0,D | 1.00C | 5.7  | 5.10 |         | SOM     | GT:0:53 | 0/1:8   | C      | T | 0 |   |
|       |    |   |     |           | 1,A   |       | 8.91 |      |         | SOM     | GT:0:34 | 0/1:7   | G      | T | 0 |   |
|       |    |   |     |           |       |       | 1.24 |      |         | SOM     | GT:0:8, | (0/1:7  | A      | G | 0 |   |
|       |    |   |     |           |       |       |      |      |         | SOM     | GT:0:30 | 0/1:8   | T      | C | 0 |   |
|       |    |   | 0.0 | 0.9       | 1.0,D | 1,D   | 5.6  | 3.37 |         | SOM     | GT:0:12 | 0/1:8   | G      | T | 0 |   |
|       |    |   |     |           |       |       | 3.9  | 3.01 |         | SOM     | GT:0:24 | 0/1:8   | C      | A | 0 |   |
|       |    |   | 0.0 | 1.0,1.0,D | 1,D   |       | 5.5  | 5.97 |         | SOM     | GT:0:86 | 0/1:7   | G      | A | 0 |   |
| ##### | ## | 0 | 0.0 | 0.9       | 1.0,D | 1,D   | 5.4  | 5.22 |         | SOM     | GT:0:96 | 0/1:7   | C      | T | 0 |   |
|       |    |   |     |           |       |       |      |      |         | SOM     | GT:0:84 | 0/1:7   | C      | T | 0 |   |
|       |    |   |     |           |       |       |      |      |         | SOM     | GT:0:15 | 0/1:7   | A      | G | 0 |   |
|       |    |   |     |           |       |       |      |      |         | SOM     | GT:0:44 | 0/1:4   | A      | G | 0 |   |
|       |    |   |     |           |       |       |      |      |         | DB;S    | GT:0:28 | 0/1:8   | A      | G | 0 |   |
|       |    |   |     |           | 1,A   |       | 5.8  | 7.24 |         | SOM     | GT:0:55 | 0/1:8   | G      | T | 0 |   |
|       |    |   | 0.0 | 0.3       | 0.627 | 1,D   | 3.9  | 2.49 |         | SOM     | GT:0:34 | 0/1:8   | C      | A | 0 |   |
|       | ## | 0 | 0.2 | 0.0       | 0.00E | 0.647 | 4.2  | 1.72 |         | SOM     | GT:0:67 | 0/1:7   | T      | C | 0 |   |
|       |    |   | 0.0 | 0.9       | 1.0,D | 1,D   |      | 6    | 4.97    |         | SOM     | GT:0:48 | 0/1:8  | G | T | 0 |
|       | ## |   | 0.1 | 0.5       | 0.81E | 1.00C | 5.1  | 4.00 |         | SOM     | GT:0:33 | 0/1:8   | A      | G | 0 |   |
|       |    |   |     |           |       |       |      |      | 0       | 0       | SOM     | GT:0:10 | 0/1:8  | C | A | 0 |
|       |    |   |     |           |       |       |      |      |         | 0       | SOM     | GT:0:99 | 0/1:7  | G | A | 0 |
|       |    |   |     |           |       |       | 3.2  |      |         |         | SOM     | GT:0:47 | 0/1:7  | G | T | 0 |
|       |    |   |     |           |       |       | 1.27 |      |         |         | SOM     | GT:0:95 | 0/1:7  | G | A | 0 |
|       |    |   |     |           |       |       | 3.1  |      |         |         | SOM     | GT:0:34 | 0/1:8  | A | G | 0 |
|       |    |   |     |           |       |       |      |      |         |         | SOM     | GT:0:36 | 0/1:8  | C | A | 0 |
|       |    |   |     |           |       |       |      |      | 0       | 0       | SOM     | GT:0:9, | (0/1:7 | T | C | 0 |
|       | 0  | 0 |     |           |       |       |      |      | 0.1     | 0       | SOM     | GT:0:15 | 0/1:8  | G | A | 0 |
|       |    |   |     |           |       |       |      |      |         |         | SOM     | GT:0:12 | 0/1:8  | G | A | 0 |
|       |    |   | 0.0 | 0.6       | 0.90E | 1,D   | 3.7  | 4.04 |         |         | SOM     | GT:0:53 | 0/1:7  | A | G | 0 |
|       |    |   |     |           |       |       |      |      |         |         | SOM     | GT:0:27 | 0/1:8  | C | T | 0 |
|       |    |   |     |           |       |       |      |      |         |         | SOM     | GT:0:58 | 0/1:8  | G | A | 0 |
|       | ## | 0 |     |           |       |       |      |      |         |         | SOM     | GT:0:58 | 0/1:7  | G | A | 0 |
|       |    |   |     |           |       |       |      |      |         |         | SOM     | GT:0:32 | 0/1:4  | A | G | 0 |
|       |    |   | 0.0 | 0.5       | 0.93E | 1,N   | 2.5  |      |         |         | SOM     | GT:0:83 | 0/1:7  | G | A | 0 |
|       |    |   |     |           |       |       |      |      | 0       | 0.1     | DB;S    | GT:0:45 | 0/1:7  | G | C | 0 |
|       |    |   |     |           |       |       |      |      |         |         | SOM     | GT:0:45 | 0/1:8  | C | T | 0 |
|       |    |   | 0.5 | 0.0       | 0.0,  | B     | 1,N  |      |         |         | SOM     | GT:0:38 | 0/1:7  | C | A | 0 |
|       |    |   |     |           |       |       |      |      | 0       |         | SOM     | GT:0:39 | 0/1:4  | G | A | 0 |
|       | ## | 0 | 0.1 | 0.3       | 0.72E | 1,N   | 4.9  | 3.90 |         |         | SOM     | GT:0:57 | 0/1:7  | G | A | 0 |
|       |    |   | 0.0 | 0.9       | 1.0,D | 1,D   |      | 5    | 3.70    |         | SOM     | GT:0:11 | 0/1:8  | G | T | 0 |
|       |    |   | 0.0 | 0.1       | 0.56E | 1.00C | 5.4  | 2.84 |         |         | SOM     | GT:0:68 | 0/1:8  | A | G | 0 |
| 0.002 | 0  | 0 |     |           |       |       |      |      |         |         | SOM     | GT:0:70 | 0/1:7  | G | A | 0 |
| 0.197 | 0  | 1 |     |           |       |       |      |      | 0.5     | 0.5     | DB;S    | GT:0:52 | 0/1:7  | G | A | 0 |
|       |    |   |     |           |       |       |      |      |         |         | SOM     | GT:0:10 | 0/1:7  | G | C | 0 |
|       | 0  | 0 |     |           |       |       |      |      |         |         | SOM     | GT:0:83 | 0/1:7  | G | A | 0 |
|       |    |   |     |           |       |       |      |      |         |         | SOM     | GT:0:40 | 0/1:7  | G | A | 0 |
|       | ## | 0 |     |           |       |       |      |      |         |         | SOM     | GT:0:73 | 0/1:7  | G | A | 0 |
|       |    |   |     |           |       |       |      |      |         |         | SOM     | GT:0:35 | 0/1:8  | G | C | 0 |
|       |    |   |     |           |       |       |      |      |         |         | SOM     | GT:0:36 | 0/1:8  | G | T | 0 |
|       |    |   |     |           |       |       |      |      |         |         | DB;S    | GT:0:35 | 0/1:8  | C | T | 0 |
|       |    |   |     |           |       |       | 5.5  | 2.43 |         |         | SOM     | GT:0:49 | 0/1:7  | C | A | 0 |
|       |    |   |     |           |       |       |      |      |         |         | SOM     | GT:0:18 | 0/1:8  | T | A | 0 |

|       |    |   |                     |      |      |      |   |                     |   |   |
|-------|----|---|---------------------|------|------|------|---|---------------------|---|---|
| .     | .  | . | .                   | .    | .    | .    | . | SOMGT:0:37 0/1:4 A  | G | 0 |
| .     | .  | . | .                   | .    | .    | .    | . | SOMGT:0:46 0/1:4 G  | T | 0 |
| .     | .  | . | .                   | .    | .    | .    | . | SOMGT:0:8,(0/1:1 T  | C | 0 |
| .     | .  | . | .                   | .    | .    | 0    | . | SOMGT:0:8,(0/1:2 T  | C | 0 |
| .     | .  | . | .                   | .    | .    | .    | . | SOMGT:0:8,(0/1:2 A  | G | 0 |
| ##### | ## | . | 0.2(0.507 1.000     | 4.8  | 1.30 | .    | . | SOMGT:0:10 0/1:2 C  | T | 0 |
| .     | .  | . | 0.4:0.1:0.931 1,D   | 4.3  | 1.68 | .    | . | SOMGT:0:45 0/1:4 C  | T | 0 |
| .     | .  | . | .                   | .    | .    | .    | . | SOMGT:0:13 0/1:2 C  | T | 0 |
| .     | .  | . | .                   | 1,D  | 5.3  | 2.11 | . | SOMGT:0:39 0/1:4 C  | A | 0 |
| .     | .  | . | .                   | .    | 2.24 | .    | . | SOMGT:0:40 0/1:4 G  | A | 0 |
| .     | .  | . | .                   | .    | 2.2  | 0    | 0 | SOMGT:0:20 0/1:2 G  | A | 0 |
| .     | .  | . | 0.4:0.0(0.0,B 1,N   | 1.81 | .    | .    | . | SOMGT:0:12 0/1:1 A  | G | 0 |
| 5E-04 | 0  | 0 | 0.0:0.4:0.988 1,N   | 2.82 | .    | .    | . | SOMGT:0:11 0/1:2 C  | T | 0 |
| .     | .  | . | .                   | 5.2  | .    | .    | . | SOMGT:0:53 0/1:5 C  | T | 0 |
| .     | .  | . | .                   | .    | .    | 0    | . | SOMGT:0:8,(0/1:1 A  | G | 0 |
| .     | .  | . | .                   | .    | .    | 0    | . | SOMGT:0:24 0/1:4 C  | G | 0 |
| .     | .  | . | .                   | 2.9  | 1.25 | .    | . | SOMGT:0:34 0/1:4 C  | A | 0 |
| .     | .  | . | .                   | .    | .    | .    | . | SOMGT:0:12 0/1:1 A  | G | 0 |
| .     | .  | . | .                   | 3.64 | .    | .    | . | SOMGT:0:19 0/1:2 C  | T | 0 |
| .     | .  | . | .                   | 3.8  | .    | .    | . | SOMGT:0:47 0/1:5 G  | A | 0 |
| .     | .  | . | .                   | 3.8  | .    | .    | . | SOMGT:0:15 0/1:1 G  | A | 0 |
| ##### | ## | 0 | .                   | .    | .    | .    | . | SOMGT:0:20 0/1:2 C  | T | 0 |
| .     | .  | . | .                   | .    | .    | 0    | . | SOMGT:0:23 0/1:4 C  | T | 0 |
| .     | .  | . | 0.5(0.0:0.04,1,N    | 2.1  | .    | .    | . | SOMGT:0:10 0/1:1 G  | T | 0 |
| .     | .  | . | 0.6(0.0(0.0,B 1,N   | .    | .    | .    | . | SOMGT:0:53 0/1:4 G  | A | 0 |
| .     | ## | 0 | 0.0(0.1:0.588 0.879 | 5.8  | 2.16 | 0    | . | SOMGT:0:32 0/1:4 C  | T | 0 |
| .     | .  | . | .                   | .    | .    | .    | . | SOMGT:0:25 0/1:4 C  | T | 0 |
| .     | .  | . | 0.6:0.3:0.745 1,D   | 3.6  | 2.38 | .    | . | DB;SGT:0:29 0/1:4 A | C | 0 |
| .     | .  | . | .                   | .    | .    | .    | . | DB;SGT:0:30 0/1:2 C | T | 0 |
| .     | .  | . | .                   | .    | .    | .    | . | SOMGT:0:16 0/1:4 G  | T | 0 |
| .     | .  | . | .                   | .    | .    | .    | . | SOMGT:0:96 0/1:1 A  | G | 0 |
| .     | .  | . | 0.0:0.6(0.832 1,D   | 5.9  | 5.19 | .    | . | SOMGT:0:43 0/1:4 C  | T | 0 |
| .     | .  | . | .                   | .    | .    | .    | . | SOMGT:0:13 0/1:1 G  | T | 0 |
| .     | .  | . | 0.0(0.9:1.0,D 0.617 | 4.2  | 4.51 | .    | . | SOMGT:0:13 0/1:1 G  | A | 0 |
| .     | .  | . | .                   | 4.9  | .    | .    | . | SOMGT:0:23 0/1:4 A  | T | 0 |
| .     | ## | 0 | .                   | 1.26 | .    | .    | . | SOMGT:0:57 0/1:4 C  | T | 0 |
| .     | .  | . | .                   | 2.16 | .    | .    | . | SOMGT:0:16 0/1:2 C  | T | 0 |
| .     | ## | 0 | .                   | .    | .    | .    | . | SOMGT:0:21 0/1:2 T  | C | 0 |
| .     | ## | 0 | 0.0:0.9(1.0,D 0.977 | 5.4  | 3.82 | 0    | . | SOMGT:0:51 0/1:4 C  | T | 0 |
| .     | .  | . | 0.0:0.9(0.999 1.000 | 4.7  | 3.65 | .    | . | SOMGT:0:36 0/1:4 A  | G | 0 |
| .     | .  | . | 1.0:0.0:0.0,B 1,N   | .    | .    | .    | . | DB;SGT:0:10 0/1:2 A | G | 0 |
| .     | ## | 0 | 0.1:0.0(0.003 1.000 | 3.6  | 1.87 | .    | . | SOMGT:0:10 0/1:2 G  | A | 0 |
| .     | .  | . | 0.4:0.0:0.044 0.995 | 4.2  | 1.79 | .    | . | SOMGT:0:70 0/1:1 T  | C | 0 |
| .     | .  | . | .                   | .    | .    | .    | . | SOMGT:0:11 0/1:1 G  | A | 0 |
| .     | .  | . | .                   | .    | .    | .    | . | SOMGT:0:16 0/1:2 C  | T | 0 |
| .     | ## | 0 | .                   | .    | .    | 0    | . | SOMGT:0:55 0/1:4 G  | A | 0 |
| .     | .  | . | 0.0(1.0:1.0,D 0.813 | 4.2  | 3.64 | .    | . | SOMGT:0:14 0/1:2 G  | A | 0 |
| .     | .  | . | 0.0:0.9:0.994 1.000 | 4.2  | 2.91 | .    | . | SOMGT:0:12 0/1:1 C  | T | 0 |
| .     | .  | . | .                   | .    | .    | .    | . | SOMGT:0:65 0/1:1 C  | T | 0 |
| .     | .  | . | 0.0:0.2:0.479 1,N   | 3.4  | 2.43 | .    | . | SOMGT:0:76 0/1:1 C  | T | 0 |
| .     | ## | 0 | .                   | .    | .    | 0    | . | SOMGT:0:89 0/1:1 C  | T | 0 |
| ##### | ## | 0 | .                   | .    | .    | .    | . | SOMGT:0:20 0/1:4 C  | T | 0 |
| .     | ## | 0 | 0.0(0.8:0.998 1,D   | 4    | 3.02 | .    | . | SOMGT:0:10 0/1:1 G  | A | 0 |
| .     | ## | 0 | 0.0(0.0(0.003 1,N   | .    | .    | 0    | 0 | SOMGT:0:70 0/1:1 G  | A | 0 |

|       |    |     |     |       |       |       |                    |                    |                    |                     |                     |   |   |
|-------|----|-----|-----|-------|-------|-------|--------------------|--------------------|--------------------|---------------------|---------------------|---|---|
|       |    |     |     |       |       | 0     | SOMGT:0:19 0/1:4 A | G                  | 0                  |                     |                     |   |   |
|       |    |     |     |       |       | 2.7   | SOMGT:0:24 0/1:2 T | C                  | 0                  |                     |                     |   |   |
|       |    |     |     |       |       |       | SOMGT:0:23 0/1:4 A | T                  | 0                  |                     |                     |   |   |
|       |    | 0.0 | 0.6 | 0.978 | 0.861 | 5.5   | 3.81               | SOMGT:0:11 0/1:2 G | A                  | 0                   |                     |   |   |
|       |    | 0.0 | 0.8 | 0.998 | 1.0   | 5.4   | 3.63               | SOMGT:0:63 0/1:1 C | A                  | 0                   |                     |   |   |
|       |    |     |     |       |       | 0     | 0                  | SOMGT:0:16 0/1:2 G | A                  | 0                   |                     |   |   |
|       | 0  | 0   | 0.1 | 0.5   | 0.96  | 1.000 | 5.7                | 3.45               | SOMGT:0:86 0/1:1 C | T                   | 0                   |   |   |
|       |    |     | 0.0 | 0.5   | 0.984 | 0.997 | 5.2                | 3.64               | SOMGT:0:29 0/1:7 G | A                   | 0                   |   |   |
|       |    |     | 0.0 | 0.9   | 0.997 | 1.000 | 5.8                | 4.50               | SOMGT:0:91 0/1:1 C | A                   | 0                   |   |   |
| 2E-04 | ## | 0   | 0.1 | 0.2   | 0.981 | 0.995 | 4.3                |                    | SOMGT:0:72 0/1:1 C | T                   | 0                   |   |   |
|       | ## | 0   | 0.0 | 0.9   | 1.0   | D 1,D | 5.6                | 3.40               | 0                  | SOMGT:0:48 0/1:4 C  | T                   | 0 |   |
|       |    |     |     |       |       |       | 5.1                |                    |                    | SOMGT:0:49 0/1:4 G  | T                   | 0 |   |
|       |    |     | 0.0 | 0.0   | 0.18  | 1.1,D | 5.8                | 3.16               |                    | SOMGT:0:14 0/1:2 T  | C                   | 0 |   |
|       |    |     |     |       |       |       |                    |                    | 0                  | SOMGT:0:14 0/1:1 C  | T                   | 0 |   |
|       |    |     |     |       |       |       |                    |                    |                    | SOMGT:0:28 0/1:4 C  | A                   | 0 |   |
|       |    |     |     |       |       |       | 5.1                | 3.89               |                    | SOMGT:0:27 0/1:4 T  | C                   | 0 |   |
|       |    |     |     |       |       |       |                    |                    |                    | SOMGT:0:12 0/1:2 G  | A                   | 0 |   |
|       | 0  | 0   |     |       |       |       |                    |                    | 0                  | DB;SGT:0:88 0/1:1 G | A                   | 0 |   |
|       | ## | 0   | 0.0 | 0.9   | 1.0   | D 1,D | 3.6                | 3.58               |                    | SOMGT:0:22 0/1:4 C  | T                   | 0 |   |
|       |    |     |     |       |       |       | 3.2                | 3.75               |                    | SOMGT:0:47 0/1:7 C  | A                   | 0 |   |
|       |    |     |     |       |       |       |                    |                    |                    | SOMGT:0:33 0/1:4 C  | T                   | 0 |   |
|       |    |     |     |       |       |       |                    |                    |                    | SOMGT:0:21 0/1:4 G  | A                   | 0 |   |
|       |    |     |     |       |       |       |                    |                    | 0                  | 0                   | SOMGT:0:21 0/1:4 G  | A | 0 |
|       |    |     |     |       |       |       | 3.7                | 3.15               |                    | SOMGT:0:25 0/1:4 G  | A                   | 0 |   |
|       |    |     |     |       |       |       |                    |                    |                    | SOMGT:0:8,10/1:4 G  | T                   | 0 |   |
|       | ## | 0   | 0.1 | 0.0   | 0.14  | 1.0   | 739                | 5.2                | 1.40               | 0                   | SOMGT:0:83 0/1:1 G  | A | 0 |
|       |    |     |     |       |       |       |                    |                    |                    |                     | SOMGT:0:15 0/1:1 A  | T | 0 |
|       |    |     |     |       |       |       |                    |                    |                    | 0                   | SOMGT:0:33 0/1:4 G  | A | 0 |
|       |    |     |     |       |       |       |                    |                    |                    |                     | SOMGT:0:37 0/1:4 A  | G | 0 |
|       | ## | 0   |     |       |       |       |                    |                    |                    |                     | SOMGT:0:57 0/1:4 C  | T | 0 |
|       |    |     |     |       |       |       |                    |                    |                    |                     | SOMGT:0:16 0/1:1 T  | A | 0 |
| ##### | ## | 0   |     |       |       |       |                    |                    |                    | 0                   | DB;SGT:0:58 0/1:4 G | A | 0 |
|       | ## | 0   | 0.0 | 0.9   | 1.0   | D 1,D | 5.9                | 6.16               |                    |                     | SOMGT:0:90 0/1:1 G  | A | 0 |
|       | ## | 0   |     |       |       |       |                    |                    |                    |                     | SOMGT:0:43 0/1:7 C  | T | 0 |
|       |    |     |     |       |       |       |                    |                    |                    |                     | SOMGT:0:28 0/1:2 T  | G | 0 |
|       |    |     |     |       |       |       |                    |                    |                    |                     | SOMGT:0:17 0/1:4 C  | T | 0 |
|       |    |     |     |       |       |       |                    |                    |                    |                     | SOMGT:0:12 0/1:2 G  | A | 0 |
|       |    |     |     |       |       |       |                    |                    |                    |                     | SOMGT:0:42 0/1:4 T  | C | 0 |
|       |    |     |     |       |       |       |                    |                    |                    |                     | SOMGT:0:19 0/1:4 G  | A | 0 |
|       |    |     |     |       |       |       |                    |                    |                    |                     | SOMGT:0:11 0/1:1 C  | T | 0 |
|       |    |     |     |       |       |       | 2.64               |                    |                    |                     | SOMGT:0:18 0/1:2 G  | A | 0 |
|       |    |     |     |       |       |       |                    |                    |                    |                     | SOMGT:0:20 0/1:4 T  | C | 0 |
|       | 0  | 0   |     |       |       |       |                    |                    |                    |                     | DB;SGT:0:20 0/1:4 G | A | 0 |
|       |    |     |     |       |       |       |                    |                    |                    |                     | SOMGT:0:52 0/1:4 A  | G | 0 |
|       |    |     |     |       |       |       |                    |                    |                    |                     | SOMGT:0:57 0/1:4 C  | T | 0 |
|       |    |     |     |       |       |       |                    |                    |                    |                     | SOMGT:0:57 0/1:4 G  | T | 0 |
|       |    |     |     |       |       |       |                    |                    |                    |                     | SOMGT:0:59 0/1:4 G  | A | 0 |
|       |    |     |     |       |       |       |                    |                    |                    |                     | SOMGT:0:29 0/1:4 A  | G | 0 |
|       | ## | 0   |     |       |       |       |                    |                    |                    | 0                   | SOMGT:0:81 0/1:1 C  | T | 0 |
|       |    |     |     |       |       |       |                    |                    |                    |                     | SOMGT:0:10 0/1:1 G  | A | 0 |
|       |    |     |     |       |       |       |                    |                    |                    |                     | SOMGT:0:15 0/1:1 T  | C | 0 |
|       |    |     | 0.0 | 1.0   | 1.0   | D 1,D | 4.2                | 4.48               |                    |                     | DB;SGT:0:63 0/1:4 C | T | 0 |
|       | 0  | 0   |     |       |       |       |                    |                    |                    | 0                   | SOMGT:0:99 0/1:1 C  | T | 0 |
|       |    |     | 0.0 | 1.0   | 1.0   | D 1,D | 5.7                | 5.41               |                    |                     | SOMGT:0:64 0/1:1 G  | A | 0 |

|       |    |                       |          |     |                     |   |   |
|-------|----|-----------------------|----------|-----|---------------------|---|---|
|       |    | 0.0 0.9 0.996 1,D     | 3.6 2.38 |     | SOMGT:0:68 0/1:G    | T | 0 |
|       | ## | 0                     | 1.66     |     | SOMGT:0:51 0/1:C    | T | 0 |
|       |    |                       | 3.3      |     | SOMGT:0:12 0/1:C    | T | 0 |
|       | ## | 0                     |          | 0   | SOMGT:0:11 0/1:C    | T | 0 |
|       |    |                       | 1.32     |     | SOMGT:0:40 0/1:G    | A | 0 |
|       |    |                       | 2.9 2.80 |     | SOMGT:0:28 0/1:G    | C | 0 |
|       |    | 0.0 0.1 0.865 1,D     | 4 2.29   |     | SOMGT:0:60 0/1:G    | A | 0 |
|       |    |                       |          |     | SOMGT:0:84 0/1:A    | G | 0 |
|       |    |                       | 2.1      |     | SOMGT:0:26 0/1:C    | T | 0 |
|       | ## | 0 0.9 0.0 0.014 1,N   |          |     | SOMGT:0:83 0/1:G    | A | 0 |
|       |    | 0.0 0.6 0.991 0.706   | 4.9 1.80 |     | SOMGT:0:96 0/1:C    | A | 0 |
|       | 0  | 0                     | 2.2      | 0 0 | DB;SOMGT:0:71 0/1:C | A | 0 |
|       | ## | 0                     | 1.37     | 0   | SOMGT:0:60 0/1:C    | T | 0 |
|       |    |                       |          |     | SOMGT:0:84 0/1:G    | T | 0 |
| 2E-04 | ## | 0                     |          | 0   | SOMGT:0:67 0/1:C    | T | 0 |
|       |    | 0.0 1.0 1.0,D 1,D     | 5.9 4.56 |     | SOMGT:0:73 0/1:C    | T | 0 |
|       |    |                       |          |     | SOMGT:0:23 0/1:G    | T | 0 |
|       |    |                       |          |     | SOMGT:0:60 0/1:A    | G | 0 |
| 5E-04 | 0  | 0                     |          |     | SOMGT:0:40 0/1:G    | A | 0 |
| 3E-04 | 0  | 0 0.0 0.4 0.99, 1,N   | 2.6 2.98 |     | SOMGT:0:10 0/1:G    | A | 0 |
|       |    |                       |          |     | SOMGT:0:39 0/1:G    | A | 0 |
|       |    | 0.0 0.9 1.0,D         | 6 3.85   |     | SOMGT:0:73 0/1:C    | A | 0 |
|       |    |                       |          |     | SOMGT:0:10 0/1:C    | G | 0 |
|       |    |                       | 3.4      |     | SOMGT:0:34 0/1:A    | G | 0 |
|       | 0  | 0                     |          | 0 0 | SOMGT:0:13 0/1:A    | G | 0 |
|       |    |                       |          | 0   | SOMGT:0:24 0/1:A    | T | 0 |
|       |    |                       | 2.9      |     | SOMGT:0:45 0/1:C    | A | 0 |
|       | ## | 0 0.0 0.0 0.007 0.657 | 4.8 2.89 |     | SOMGT:0:66 0/1:C    | T | 0 |
| 2E-04 | ## | 0 0.0 1.0, 1.0,D 1,D  | 3.70     |     | SOMGT:0:82 0/1:C    | T | 0 |
|       |    |                       |          |     | SOMGT:0:21 0/1:T    | C | 0 |
|       | ## | 0                     | 1.51     |     | SOMGT:0:32 0/1:G    | A | 0 |
|       |    |                       |          |     | SOMGT:0:12 0/1:G    | A | 0 |
|       |    |                       | 2.4 1.98 |     | SOMGT:0:8, 0/1:C    | T | 0 |
|       |    | 0.0 0.9 0.996 1,D     | 4.5 3.86 |     | SOMGT:0:16 0/1:T    | C | 0 |
|       |    |                       |          | 0   | SOMGT:0:65 0/1:A    | C | 0 |
|       |    |                       | 5.9 3.72 |     | SOMGT:0:41 0/1:T    | C | 0 |
|       |    |                       |          |     | SOMGT:0:28 0/1:T    | C | 0 |
|       |    |                       | 2.5 2.14 |     | SOMGT:0:14 0/1:T    | C | 0 |
|       |    |                       |          |     | SOMGT:0:35 0/1:G    | T | 0 |
|       |    | 0.0 0.9 1.0,D 0.998   | 5.8 3.48 |     | SOMGT:0:70 0/1:G    | T | 0 |
|       |    |                       |          |     | SOMGT:0:21 0/1:C    | T | 0 |
|       |    |                       |          |     | SOMGT:0:26 0/1:G    | A | 0 |
|       |    |                       |          |     | SOMGT:0:23 0/1:T    | C | 0 |
| 2E-04 | ## | 0                     |          | 0   | SOMGT:0:54 0/1:C    | T | 0 |
|       |    |                       |          |     | SOMGT:0:30 0/1:A    | C | 0 |
|       | ## | 0 0.0 0.9 1.0,D 1,D   | 5.8 4.37 |     | SOMGT:0:28 0/1:G    | A | 0 |
|       |    |                       |          | 0   | SOMGT:0:16 0/1:G    | A | 0 |
|       |    |                       |          |     | SOMGT:0:22 0/1:T    | C | 0 |
|       |    |                       |          |     | SOMGT:0:56 0/1:T    | C | 0 |
|       |    |                       | 2.9      |     | SOMGT:0:73 0/1:C    | T | 0 |
| 2E-04 | 0  | 0                     | 2.9 2.40 | 0 0 | SOMGT:0:22 0/1:G    | A | 0 |
| ##### | ## | 0 0.0 0.3 0.935 1,D   | 5.2 4.87 |     | SOMGT:0:22 0/1:G    | A | 0 |
|       |    | 0.3 0.0 0.01, 1,N     |          |     | SOMGT:0:96 0/1:A    | G | 0 |
|       | ## | 0 0.0 0.9 1.0,D 1,D   | 5.6 4.88 |     | SOMGT:0:51 0/1:C    | T | 0 |



|       |    |     |     |       |       |       |      |                     |                   |   |   |
|-------|----|-----|-----|-------|-------|-------|------|---------------------|-------------------|---|---|
| ##    | 0  | 0.1 | 0.0 | 0.004 | 0.982 | 3.1   | 2.10 | SOMGT:0:34 0/1:zA   | G                 | 0 |   |
| .     | .  | 0.0 | 0.9 | 1.0,D | 1,D   | 5.8   | 4.44 | SOMGT:0:48 0/1:zT   | C                 | 0 |   |
| .     | .  | .   | .   | .     | .     | .     | .    | SOMGT:0:36 0/1:zT   | C                 | 0 |   |
| .     | .  | .   | .   | .     | .     | .     | .    | SOMGT:0:29 0/1:zC   | T                 | 0 |   |
| .     | .  | .   | .   | .     | .     | 2.6   | 2.16 | SOMGT:0:20 0/1:zC   | T                 | 0 |   |
| ##    | 0  | .   | .   | .     | .     | .     | .    | SOMGT:0:82 0/1:zG   | A                 | 0 |   |
| .     | .  | .   | .   | .     | .     | .     | .    | SOMGT:0:71 0/1:zT   | C                 | 0 |   |
| .     | .  | 0.1 | 0.1 | 0.525 | 1,D   | 4.6   | 1.33 | SOMGT:0:24 0/1:zT   | C                 | 0 |   |
| .     | .  | 0.0 | 0.9 | 1.0,D | 1,D   | 4.6   | 5.20 | SOMGT:0:53 0/1:zG   | A                 | 0 |   |
| .     | .  | .   | .   | .     | .     | 1,A   | 4.9  | 8.66                | SOMGT:0:74 0/1:zC | T | 0 |
| .     | .  | .   | .   | .     | .     | .     | .    | SOMGT:0:10 0/1:zG   | A                 | 0 |   |
| .     | .  | 0.0 | 1.0 | 1.0,D | 1,D   | 5.8   | 4.61 | SOMGT:0:50 0/1:zC   | T                 | 0 |   |
| .     | .  | .   | .   | .     | .     | .     | 0    | SOMGT:0:92 0/1:zG   | A                 | 0 |   |
| .     | .  | .   | .   | .     | .     | .     | .    | SOMGT:0:70 0/1:zC   | T                 | 0 |   |
| .     | .  | .   | .   | .     | .     | .     | .    | SOMGT:0:69 0/1:zC   | T                 | 0 |   |
| .     | .  | .   | .   | .     | .     | 2.9   | 1.44 | SOMGT:0:11 0/1:zC   | T                 | 0 |   |
| .     | .  | 0.3 | 0.9 | 0.993 | 1,D   | 4.7   | .    | SOMGT:0:57 0/1:zT   | C                 | 0 |   |
| ##    | 0  | .   | .   | .     | .     | 5.7   | .    | SOMGT:0:30 0/1:zC   | T                 | 0 |   |
| ##### | ## | 0   | 0.0 | 0.0   | 0.231 | 1,N   | 3.09 | SOMGT:0:12 0/1:zG   | A                 | 0 |   |
| .     | ## | 0   | .   | .     | .     | .     | 0    | SOMGT:0:14 0/1:zC   | T                 | 0 |   |
| .     | .  | .   | .   | .     | .     | .     | .    | SOMGT:0:27 0/1:zA   | G                 | 0 |   |
| .     | .  | 0.0 | 0.9 | 0.996 | 1,D   | 5.1   | 3.79 | SOMGT:0:10 0/1:zT   | A                 | 0 |   |
| .     | .  | .   | .   | .     | .     | .     | .    | SOMGT:0:11 0/1:zC   | T                 | 0 |   |
| .     | .  | .   | .   | .     | .     | 3     | .    | SOMGT:0:97 0/1:zG   | T                 | 0 |   |
| .     | .  | 0.3 | 0.0 | 0.041 | 0.967 | 4.4   | 1.40 | SOMGT:0:54 0/1:zC   | T                 | 0 |   |
| .     | .  | 0.0 | 0.0 | 0.167 | 1.000 | 5     | 3.97 | SOMGT:0:51 0/1:zC   | T                 | 0 |   |
| ##    | 0  | .   | .   | .     | .     | .     | .    | SOMGT:0:90 0/1:zG   | A                 | 0 |   |
| .     | .  | .   | .   | .     | .     | .     | .    | SOMGT:0:99 0/1:zA   | G                 | 0 |   |
| .     | .  | .   | .   | .     | .     | .     | .    | SOMGT:0:14 0/1:zG   | A                 | 0 |   |
| ##    | 0  | .   | .   | .     | .     | .     | .    | SOMGT:0:18 0/1:zG   | A                 | 0 |   |
| .     | .  | .   | .   | .     | .     | .     | .    | SOMGT:0:52 0/1:zC   | T                 | 0 |   |
| ##### | .  | .   | .   | .     | .     | .     | .    | SOMGT:0:68 0/1:zC   | T                 | 0 |   |
| .     | .  | .   | .   | .     | .     | 2.5   | .    | SOMGT:0:9,10/1:zC   | A                 | 0 |   |
| .     | .  | .   | .   | .     | .     | 1.40  | .    | SOMGT:0:42 0/1:zC   | T                 | 0 |   |
| .     | .  | 0.0 | 1.0 | 1.0,D | 1,D   | 3.6   | 3.67 | SOMGT:0:78 0/1:zC   | T                 | 0 |   |
| .     | .  | 0.1 | 0.0 | 0.0,B | 1.000 | 4.5   | 3.16 | SOMGT:0:93 0/1:zC   | A                 | 0 |   |
| ##    | 0  | 0.0 | 0.6 | 0.966 | 1.000 | 3.84  | .    | SOMGT:0:54 0/1:zC   | A                 | 0 |   |
| .     | .  | .   | .   | .     | .     | .     | .    | SOMGT:0:17 0/1:zG   | T                 | 0 |   |
| .     | .  | 0.0 | 0.9 | 1.0,D | 1.000 | 3.2   | 3.89 | SOMGT:0:16 0/1:zC   | T                 | 0 |   |
| .     | .  | .   | .   | .     | .     | 2.05  | .    | SOMGT:0:29 0/1:zC   | T                 | 0 |   |
| ##    | 0  | .   | .   | .     | .     | .     | .    | SOMGT:0:13 0/1:zG   | A                 | 0 |   |
| .     | .  | .   | .   | .     | .     | .     | 0    | 0 SOMGT:0:13 0/1:zA | G                 | 0 |   |
| .     | .  | .   | .   | .     | .     | .     | 0    | SOMGT:0:12 0/1:zG   | A                 | 0 |   |
| .     | .  | 0.5 | 0.0 | 0.011 | 1,N   | .     | .    | SOMGT:0:32 0/1:zT   | C                 | 0 |   |
| .     | .  | 0.0 | 0.9 | 1.0,D | 1,D   | 5.7   | 4.60 | SOMGT:0:54 0/1:zG   | A                 | 0 |   |
| .     | .  | .   | .   | .     | .     | .     | .    | SOMGT:0:35 0/1:zG   | A                 | 0 |   |
| .     | .  | 0.0 | 1.0 | 1.0,D | 1,D   | 5.6   | 3.42 | SOMGT:0:14 0/1:zC   | A                 | 0 |   |
| .     | .  | .   | .   | .     | .     | 2.47  | .    | SOMGT:0:40 0/1:zT   | C                 | 0 |   |
| ##    | 0  | .   | .   | .     | .     | 5.1   | 1.42 | SOMGT:0:57 0/1:zC   | T                 | 0 |   |
| .     | .  | .   | .   | .     | .     | .     | .    | SOMGT:0:35 0/1:zT   | C                 | 0 |   |
| .     | .  | .   | .   | .     | .     | .     | .    | SOMGT:0:28 0/1:zA   | T                 | 0 |   |
| ##### | ## | 0   | 0.1 | 0.0   | 0.122 | 1.000 | 5.9  | 3.45                | SOMGT:0:29 0/1:zC | T | 0 |
| .     | .  | 0.0 | 0.0 | 0.013 | 1,N   | .     | .    | SOMGT:0:60 0/1:zT   | C                 | 0 |   |
| .     | .  | .   | .   | .     | .     | .     | .    | SOMGT:0:15 0/1:zC   | T                 | 0 |   |

|          |   |     |     |       |         |                  |                     |                  |                  |   |   |
|----------|---|-----|-----|-------|---------|------------------|---------------------|------------------|------------------|---|---|
|          |   |     |     |       |         | SOMGT:0:31 0/1:G | T                   | 0                |                  |   |   |
| ##       | 0 |     |     |       | 0       | SOMGT:0:69 0/1:C | T                   | 0                |                  |   |   |
|          |   |     | 3.1 |       |         | SOMGT:0:31 0/1:C | T                   | 0                |                  |   |   |
|          |   |     |     |       |         | SOMGT:0:19 0/1:G | A                   | 0                |                  |   |   |
| ##       | 0 |     | 4.1 | 1.68  | 0       | SOMGT:0:58 0/1:C | T                   | 0                |                  |   |   |
|          |   |     |     |       |         | SOMGT:0:11 0/1:G | A                   | 0                |                  |   |   |
| ##       | 0 |     |     |       |         | SOMGT:0:15 0/1:G | A                   | 0                |                  |   |   |
|          |   |     |     |       |         | SOMGT:0:17 0/1:G | A                   | 0                |                  |   |   |
|          |   | 0.0 | 0.9 | 1.0,D | 0.962   | 3.31             | SOMGT:0:17 0/1:G    | A                | 0                |   |   |
|          |   |     |     |       |         |                  | DB;SOMGT:0:44 0/1:G | A                | 0                |   |   |
|          |   |     |     |       |         |                  | SOMGT:0:46 0/1:G    | A                | 0                |   |   |
|          |   |     |     |       |         |                  | SOMGT:0:11 0/1:G    | T                | 0                |   |   |
| ##       | 0 |     |     |       | 0       | SOMGT:0:21 0/1:C | T                   | 0                |                  |   |   |
|          |   |     |     |       |         |                  | SOMGT:0:28 0/1:G    | A                | 0                |   |   |
|          |   |     |     |       |         |                  | SOMGT:0:42 0/1:A    | C                | 0                |   |   |
|          |   |     |     |       |         |                  | SOMGT:0:33 0/1:T    | C                | 0                |   |   |
|          |   | 0.4 | 0.0 | 0.01  | 110.982 |                  | SOMGT:0:54 0/1:G    | A                | 0                |   |   |
|          |   |     |     |       |         | 0                | SOMGT:0:49 0/1:C    | T                | 0                |   |   |
|          |   |     |     |       |         |                  | SOMGT:0:91 0/1:G    | T                | 0                |   |   |
|          |   |     |     |       |         |                  | SOMGT:0:37 0/1:C    | T                | 0                |   |   |
|          |   |     |     |       |         |                  | SOMGT:0:34 0/1:T    | G                | 0                |   |   |
|          |   |     |     |       |         |                  | SOMGT:0:64 0/1:C    | T                | 0                |   |   |
|          |   |     |     |       |         |                  | SOMGT:0:52 0/1:C    | T                | 0                |   |   |
|          |   |     |     |       |         |                  | SOMGT:0:22 0/1:G    | A                | 0                |   |   |
|          |   |     |     |       |         |                  | SOMGT:0:69 0/1:C    | T                | 0                |   |   |
|          |   |     |     |       |         |                  | SOMGT:0:47 0/1:C    | T                | 0                |   |   |
|          |   |     |     |       |         | 0                | SOMGT:0:33 0/1:G    | T                | 0                |   |   |
|          |   |     |     |       |         |                  | SOMGT:0:41 0/1:G    | A                | 0                |   |   |
|          |   |     |     |       | 0.1     | 0.5              | SOMGT:0:9,0/1:C     | T                | 0                |   |   |
|          |   |     |     |       | 2.1     | 0                | SOMGT:0:18 0/1:G    | T                | 0                |   |   |
|          |   |     |     |       | 2.1     |                  | SOMGT:0:18 0/1:G    | A                | 0                |   |   |
|          |   |     |     |       |         | 0                | SOMGT:0:17 0/1:T    | A                | 0                |   |   |
| ##       | 0 | 0.0 | 0.9 | 0.994 | 0.970   | 5.3              | 3.78                | SOMGT:0:43 0/1:C | T                | 0 |   |
|          |   |     |     |       |         |                  |                     | SOMGT:0:9,0/1:C  | T                | 0 |   |
|          |   |     |     |       |         |                  |                     | SOMGT:0:75 0/1:T | C                | 0 |   |
|          |   |     |     |       |         |                  |                     | SOMGT:0:12 0/1:G | A                | 0 |   |
|          |   | 0.0 | 0.9 | 1.0,D | 1.000   | 3.5              | 3.09                | SOMGT:0:20 0/1:C | T                | 0 |   |
| ##       | 0 | 0.2 | 0.7 | 0.994 | 0.990   | 4.8              | 2.69                | SOMGT:0:96 0/1:C | T                | 0 |   |
|          |   |     |     |       |         | 3                |                     | SOMGT:0:49 0/1:G | T                | 0 |   |
|          |   |     |     |       |         |                  |                     | SOMGT:0:40 0/1:G | A                | 0 |   |
| ##       | 0 | 0.1 | 0.9 | 1.0,D | 1.000   | 4.7              | 5.21                | SOMGT:0:11 0/1:G | A                | 0 |   |
| #####    |   |     |     |       |         | 3.5              |                     | SOMGT:0:17 0/1:T | C                | 0 |   |
|          |   |     |     |       |         |                  |                     | SOMGT:0:41 0/1:T | C                | 0 |   |
|          |   |     |     |       | 0.2     | 0.1              |                     | SOMGT:0:18 0/1:T | C                | 0 |   |
|          |   |     |     |       |         |                  |                     | SOMGT:0:13 0/1:T | A                | 0 |   |
|          |   |     |     |       |         | 5.8              | 3.77                | SOMGT:0:41 0/1:G | A                | 0 |   |
|          |   |     |     |       |         |                  |                     | SOMGT:0:26 0/1:A | G                | 0 |   |
|          |   | 0.0 | 0.9 | 1.0,D | 1.000   | 5.1              | 2.61                | SOMGT:0:39 0/1:C | A                | 0 |   |
| 4E-04 ## | 0 | 0.0 | 0.9 | 0.981 | 0.990   | 5.9              | 3.17                | SOMGT:0:35 0/1:G | A                | 0 |   |
|          |   |     |     |       |         |                  |                     | SOMGT:0:10 0/1:G | T                | 0 |   |
| ##       | 0 | 0.0 | 0.9 | 1.0,D | 1,D     | 5.6              | 4.80                | SOMGT:0:87 0/1:G | A                | 0 |   |
|          |   |     |     |       |         |                  |                     | SOMGT:0:68 0/1:T | G                | 0 |   |
|          |   |     |     |       |         |                  |                     | SOMGT:0:52 0/1:G | A                | 0 |   |
|          |   |     |     |       |         | 1,D              | 5.5                 | 4.26             | SOMGT:0:98 0/1:G | T | 0 |

|       |    |     |      |       |       |          |                   |                   |                   |   |   |
|-------|----|-----|------|-------|-------|----------|-------------------|-------------------|-------------------|---|---|
| ##    | 0  |     |      |       |       |          | SOMGT:0:42 0/1:0C | T                 | 0                 |   |   |
| ##    | 0  | 0.0 | 0.7  | 0.998 | 1,D   | 6 4.93   | 0                 | SOMGT:0:33 0/1:0C | T                 | 0 |   |
|       |    |     |      |       |       |          |                   | SOMGT:0:30 0/1:0C | T                 | 0 |   |
|       |    |     |      |       |       |          |                   | SOMGT:0:44 0/1:0G | A                 | 0 |   |
| ##    | 0  | 0   | 0.6  | 0.975 | 1.000 | 3.1 4.07 |                   | SOMGT:0:90 0/1:0G | A                 | 0 |   |
|       |    |     |      |       |       | 3.1      |                   | SOMGT:0:11 0/1:0C | T                 | 0 |   |
| 0     | 0  |     |      |       | 1,A   | 13.8     |                   | SOMGT:0:89 0/1:0C | T                 | 0 |   |
|       |    |     |      |       |       |          |                   | SOMGT:0:10 0/1:0G | A                 | 0 |   |
|       |    | 0   | 0    | 0.9   | 1.0,D | 1,D      | 4.4 4.77          | SOMGT:0:13 0/1:0G | A                 | 0 |   |
| 0     | 0  |     |      |       |       | 1.45     |                   | SOMGT:0:97 0/1:0C | T                 | 0 |   |
|       |    |     |      |       |       |          |                   | SOMGT:0:41 0/1:0T | C                 | 0 |   |
|       |    | 0   | 0    | 1.0   | 1.0,D | 1,D      | 3.7 3.79          | SOMGT:0:34 0/1:0C | T                 | 0 |   |
|       |    | 0   | 0    | 0.7   | 0.998 | 1.000    | 5.7 3.34          | SOMGT:0:43 0/1:0G | A                 | 0 |   |
|       |    |     |      |       |       |          |                   | SOMGT:0:75 0/1:0T | C                 | 0 |   |
|       |    |     |      |       |       |          |                   | SOMGT:0:23 0/1:0G | A                 | 0 |   |
|       |    |     |      |       |       |          |                   | SOMGT:0:25 0/1:0G | A                 | 0 |   |
|       |    |     |      |       |       |          |                   | SOMGT:0:32 0/1:0C | T                 | 0 |   |
|       |    |     |      |       |       |          |                   | SOMGT:0:48 0/1:0G | A                 | 0 |   |
| ##### | ## | 0   | 0    | 0     | 0.8   | 0.988    | 0.995             | 5.5 4.90          | SOMGT:0:10 0/1:0C | T | 0 |
|       |    |     |      |       |       | 2.8 2.65 |                   | SOMGT:0:16 0/1:0T | A                 | 0 |   |
|       |    | 0   | 0    | 0.9   | 0.998 | 1.000    | 4.9 3.01          | SOMGT:0:74 0/1:0G | T                 | 0 |   |
| ##    | 0  |     |      |       |       | 1.31     |                   | SOMGT:0:14 0/1:0C | T                 | 0 |   |
|       |    |     |      |       |       |          |                   | SOMGT:0:64 0/1:0G | T                 | 0 |   |
| ##### | ## | 0   | 0    | 0     | 0.8   | 0.997    | 0.987             | 4 3.66            | SOMGT:0:91 0/1:0G | A | 0 |
|       |    |     |      |       |       |          |                   | SOMGT:0:52 0/1:0C | A                 | 0 |   |
|       |    |     |      |       |       |          |                   | DB;0:51 0/1:0G    | A                 | 0 |   |
|       |    | 1   | 0    | 0     | 0.001 | 0.993    |                   | SOMGT:0:52 0/1:0A | G                 | 0 |   |
|       |    | 0.6 | 0    | 0     | 0.001 | 1,N      |                   | SOMGT:0:16 0/1:0C | T                 | 0 |   |
| ##    | 0  |     |      |       |       |          |                   | SOMGT:0:18 0/1:0G | A                 | 0 |   |
|       |    |     |      |       |       | 2.3 3.13 |                   | SOMGT:0:29 0/1:0T | C                 | 0 |   |
|       |    |     |      |       |       |          |                   | SOMGT:0:64 0/1:0C | T                 | 0 |   |
|       |    |     |      |       |       | 1.64     |                   | SOMGT:0:40 0/1:0C | T                 | 0 |   |
| ##    | 0  | 0   | 0    | 0.2   | 0.938 | 1.000    | 5.6 3.26          | SOMGT:0:32 0/1:0C | T                 | 0 |   |
|       |    | 0   | 1    |       |       | 5        |                   | SOMGT:0:34 0/1:0C | T                 | 0 |   |
|       |    |     |      |       |       |          |                   | SOMGT:0:20 0/1:0C | A                 | 0 |   |
|       |    |     |      |       |       |          |                   | SOMGT:0:15 0/1:0C | T                 | 0 |   |
|       |    |     |      |       |       |          |                   | SOMGT:0:12 0/1:0C | T                 | 0 |   |
| 0     | 0  |     |      |       |       |          |                   | SOMGT:0:13 0/1:0C | T                 | 0 |   |
|       |    |     |      |       |       |          |                   | SOMGT:0:26 0/1:0G | A                 | 0 |   |
| 2E-04 | 0  | 0   |      |       |       |          | 0                 | SOMGT:0:51 0/1:0G | A                 | 0 |   |
| ##    | 0  |     |      |       |       |          |                   | SOMGT:0:57 0/1:0C | T                 | 0 |   |
|       |    |     |      |       |       |          | 0                 | 0 DB;0:27 0/1:0C  | T                 | 0 |   |
| 5E-04 | 0  | 0   | 0.9  | 1.0,D |       | 3.7      |                   | SOMGT:0:11 0/1:0G | A                 | 0 |   |
|       |    |     |      |       |       |          |                   | SOMGT:0:62 0/1:0T | G                 | 0 |   |
|       |    |     |      |       |       |          |                   | SOMGT:0:68 0/1:0A | G                 | 0 |   |
|       |    | 0.2 | 0.68 | 1     |       | 5.3 1.29 |                   | SOMGT:0:65 0/1:0C | T                 | 0 |   |
|       |    | 0   | 0    | 0.9   | 1.0,D | 1,D      | 4.6 5.06          | SOMGT:0:99 0/1:0C | T                 | 0 |   |
|       |    | 0.1 | 0    | 0     | 0.297 | 0.998    | 4.8 4.97          | SOMGT:0:24 0/1:0C | T                 | 0 |   |
|       |    |     |      |       |       |          |                   | SOMGT:0:35 0/1:0C | T                 | 0 |   |
|       |    |     |      |       |       |          |                   | SOMGT:0:18 0/1:0C | T                 | 0 |   |
| ##### | ## | 0   | 0.4  | 0     | 0.003 | 1,N      | 1.38              | SOMGT:0:36 0/1:0C | T                 | 0 |   |
|       |    |     |      |       |       |          |                   | SOMGT:0:35 0/1:0G | C                 | 0 |   |
|       |    |     |      |       |       |          |                   | SOMGT:0:21 0/1:0G | A                 | 0 |   |
|       |    |     |      |       |       |          |                   | SOMGT:0:37 0/1:0G | T                 | 0 |   |

|       |    |   |     |     |       |       |      |      |                     |   |   |
|-------|----|---|-----|-----|-------|-------|------|------|---------------------|---|---|
|       |    |   |     |     |       |       |      |      | SOMGT:0:8,0/1:G     | A | 0 |
|       |    |   |     |     |       |       |      |      | SOMGT:0:11 0/1:T    | A | 0 |
|       |    |   |     |     |       | 1.63  |      |      | SOMGT:0:47 0/1:C    | T | 0 |
|       |    |   |     |     |       |       |      |      | SOMGT:0:10 0/1:C    | T | 0 |
|       |    |   |     |     |       | 1.65  |      |      | SOMGT:0:84 0/1:T    | A | 0 |
| 7E-04 | 0  | 0 |     |     |       |       |      |      | SOMGT:0:12 0/1:G    | A | 0 |
|       |    |   |     |     |       |       |      |      | SOMGT:0:57 0/1:C    | A | 0 |
|       | 0  | 0 |     |     |       |       |      |      | SOMGT:0:16 0/1:T    | C | 0 |
|       |    |   |     |     |       |       | 0    |      | SOMGT:0:14 0/1:C    | T | 0 |
|       | ## | 0 |     |     |       | 3.3   |      |      | SOMGT:0:10 0/1:C    | T | 0 |
|       | ## | 0 | 0.0 | 0.0 | 0.487 | 1,N   | 3.36 |      | SOMGT:0:68 0/1:G    | A | 0 |
|       |    |   |     |     |       | 1,D   | 4.7  |      | SOMGT:0:90 0/1:G    | A | 0 |
|       |    |   |     |     |       |       |      |      | SOMGT:0:39 0/1:C    | T | 0 |
|       | ## | 0 |     |     |       |       | 0    |      | SOMGT:0:92 0/1:C    | T | 0 |
|       |    |   |     |     |       |       |      |      | SOMGT:0:25 0/1:C    | T | 0 |
|       |    |   |     |     |       |       |      |      | SOMGT:0:53 0/1:C    | T | 0 |
|       |    |   |     |     |       |       | 0.3  | 0.5  | SOMGT:0:9,0/1:A     | G | 0 |
|       |    |   |     |     |       |       |      |      | SOMGT:0:21 0/1:A    | T | 0 |
|       |    |   |     |     |       |       |      |      | SOMGT:0:12 0/1:G    | A | 0 |
|       |    |   | 0.9 | 0.9 | 0.981 | 1,000 | 5.6  | 2.25 | SOMGT:0:40 0/1:T    | C | 0 |
|       |    |   |     |     |       |       |      |      | SOMGT:0:11 0/1:A    | G | 0 |
|       |    |   |     |     |       |       | 0    | 0    | SOMGT:0:11 0/1:G    | A | 0 |
|       |    |   |     |     |       |       |      |      | SOMGT:0:47 0/1:C    | T | 0 |
|       |    |   |     |     |       |       |      |      | SOMGT:0:43 0/1:G    | T | 0 |
|       |    |   |     |     |       |       | 4    | 2.52 | SOMGT:0:17 0/1:C    | A | 0 |
|       |    |   |     |     |       |       |      |      | SOMGT:0:91 0/1:G    | T | 0 |
|       | 0  | 0 |     |     |       |       |      |      | SOMGT:0:85 0/1:C    | T | 0 |
|       | 0  | 0 |     |     |       |       |      |      | SOMGT:0:43 0/1:G    | A | 0 |
|       |    |   |     |     |       |       |      | 0    | SOMGT:0:23 0/1:G    | A | 0 |
| ##### | 0  | 0 | 0.2 | 0.0 | 0.002 | 1,N   |      |      | DB;SOMGT:0:85 0/1:C | T | 0 |
|       |    |   |     |     |       |       |      |      | SOMGT:0:68 0/1:G    | A | 0 |
| 2E-04 | ## | 0 |     |     |       | 1,A   | 5.79 |      | SOMGT:0:64 0/1:G    | A | 0 |
| 0.028 | 0  | 0 |     |     |       |       |      |      | DB;SOMGT:0:76 0/1:G | A | 0 |
|       | ## | 0 |     |     |       |       |      | 0    | SOMGT:0:18 0/1:C    | T | 0 |
|       |    |   |     |     |       |       |      |      | SOMGT:0:20 0/1:C    | T | 0 |
|       | ## | 0 |     |     |       |       |      |      | SOMGT:0:44 0/1:G    | A | 0 |
|       |    |   |     |     |       |       | 5.6  | 1.92 | SOMGT:0:57 0/1:C    | T | 0 |
|       | ## | 0 | 0.0 | 0.9 | 0.999 | 1,D   | 3.7  | 3.34 | SOMGT:0:36 0/1:G    | A | 0 |
|       |    |   |     |     |       |       | 3.3  |      | SOMGT:0:27 0/1:T    | C | 0 |
|       |    |   |     |     |       |       |      |      | SOMGT:0:22 0/1:C    | T | 0 |
| 2E-04 | ## | 0 | 0.0 |     |       | 1,000 | 2.48 |      | SOMGT:0:51 0/1:G    | A | 0 |
|       | 0  | 0 |     |     |       |       |      | 0    | SOMGT:0:23 0/1:G    | A | 0 |
|       |    |   |     |     |       |       |      |      | SOMGT:0:12 0/1:G    | A | 0 |
|       |    |   |     |     |       |       |      |      | SOMGT:0:12 0/1:T    | G | 0 |
|       |    |   |     |     |       |       |      | 0    | SOMGT:0:13 0/1:T    | C | 0 |
|       |    |   |     |     |       |       |      |      | SOMGT:0:12 0/1:A    | C | 0 |
|       |    |   |     |     |       |       |      |      | SOMGT:0:27 0/1:A    | C | 0 |
|       |    |   |     |     |       |       |      |      | SOMGT:0:14 0/1:G    | A | 0 |
|       |    |   |     |     |       |       |      | 0    | DB;SOMGT:0:35 0/1:C | G | 0 |
|       |    |   | 0.7 | 0.0 | 0.097 | 0.999 | 5.2  |      | SOMGT:0:35 0/1:G    | T | 0 |
|       |    |   |     |     |       |       | 2.5  |      | SOMGT:0:30 0/1:T    | C | 0 |
|       |    |   |     |     |       |       |      |      | SOMGT:0:15 0/1:A    | G | 0 |
|       |    |   |     |     |       |       |      |      | SOMGT:0:23 0/1:C    | T | 0 |
|       |    |   |     |     |       |       | 4.9  | 4.20 | SOMGT:0:36 0/1:G    | A | 0 |

|       |    |   |                              |          |   |                      |   |   |
|-------|----|---|------------------------------|----------|---|----------------------|---|---|
|       |    |   |                              | 1.75     |   | SOMGT:0:16 0/1:2 T   | A | 0 |
|       | ## | 0 |                              |          |   | SOMGT:0:26 0/1:2 G   | A | 0 |
| 6E-04 | 0  | 0 |                              | 2.3      | 0 | SOMGT:0:55 0/1:8 C   | T | 0 |
|       |    |   |                              |          |   | SOMGT:0:10 0/1:1 G   | A | 0 |
|       |    |   |                              | 2.7      |   | SOMGT:0:30 0/1:6 A   | G | 0 |
|       |    |   |                              |          |   | SOMGT:0:24 0/1:5 G   | T | 0 |
|       | ## | 0 |                              |          |   | SOMGT:0:25 0/1:5 G   | A | 0 |
|       |    |   |                              | 4.1      |   | SOMGT:0:27 0/1:5 G   | A | 0 |
|       |    |   |                              |          |   | SOMGT:0:8,(0/1:1 C   | T | 0 |
|       |    |   |                              |          |   | SOMGT:0:21 0/1:3 T   | C | 0 |
|       |    |   |                              |          |   | SOMGT:0:81 0/1:1 T   | C | 0 |
|       |    |   |                              |          |   | SOMGT:0:33 0/1:6 G   | A | 0 |
|       |    |   |                              |          |   | SOMGT:0:62 0/1:8 C   | T | 0 |
|       | ## | 0 | 0.0,1.0,1.0,D 1,D            | 5 5.17   |   | SOMGT:0:78 0/1:1 G   | A | 0 |
|       |    |   | 0.0,0.9,0.997 1,D            | 5.9 5.77 |   | SOMGT:0:69 0/1:1 G   | A | 0 |
|       |    |   |                              |          |   | SOMGT:0:36 0/1:7 T   | C | 0 |
|       |    |   |                              |          | 0 | SOMGT:0:17 0/1:2 G   | A | 0 |
|       |    |   |                              |          |   | SOMGT:0:36 0/1:2 T   | C | 0 |
|       |    |   |                              |          |   | SOMGT:0:12 0/1:1 T   | A | 0 |
|       |    |   |                              |          |   | SOMGT:0:31 0/1:3 G   | A | 0 |
|       |    |   |                              |          |   | SOMGT:0:32 0/1:3 G   | A | 0 |
|       |    |   |                              | 2.6 1.45 |   | SOMGT:0:19 0/1:1 C   | T | 0 |
|       |    |   | 0.0,0.2,0.898 0.687 4.8 3.48 |          |   | SOMGT:0:10 0/1:1 C   | T | 0 |
| 0.001 | 0  | 0 | 0.1,0.0,0.108 1.000 3.1 1.59 | 0        |   | SOMGT:0:61 0/1:1 C   | T | 0 |
|       |    |   |                              |          |   | SOMGT:0:50 0/1:6 A   | G | 0 |
|       |    |   |                              |          |   | SOMGT:0:8,(0/1:1 C   | T | 0 |
|       |    |   |                              |          |   | SOMGT:0:42 0/1:5 C   | T | 0 |
| 0.019 | 0  | 0 |                              |          |   | DB;S GT:0:65 0/1:7 G | A | 0 |
|       |    |   | 0.1,0.0,0.014 1,P            | 1.51     | 0 | DB;S GT:0:10 0/1:1 G | A | 0 |
|       |    |   |                              |          |   | SOMGT:0:22 0/1:2 G   | T | 0 |
|       |    |   |                              |          |   | SOMGT:0:19 0/1:3 C   | T | 0 |
|       |    |   |                              | 1.36     |   | SOMGT:0:71 0/1:8 C   | A | 0 |
|       |    |   |                              |          |   | SOMGT:0:29 0/1:3 C   | A | 0 |
|       |    |   |                              |          | 0 | SOMGT:0:31 0/1:5 C   | T | 0 |
|       |    |   |                              |          |   | SOMGT:0:60 0/1:1 G   | T | 0 |
|       | ## | 0 | 0.0,0.166 1,N                |          |   | SOMGT:0:87 0/1:1 C   | T | 0 |
|       | ## | 0 |                              |          |   | SOMGT:0:48 0/1:6 G   | A | 0 |
|       |    |   | 0.0,0.0,0.278 0.981 4 1.69   |          |   | SOMGT:0:68 0/1:1 G   | T | 0 |
|       | ## | 0 | 1.0,0.0,0.004 1.000 3.3      |          |   | SOMGT:0:21 0/1:3 C   | T | 0 |
|       |    |   | 0.4,0.8,0.998 1.000 3.8 3.69 |          |   | SOMGT:0:67 0/1:1 C   | T | 0 |
|       |    |   | 0.1,0.389 1.000              |          |   | SOMGT:0:18 0/1:3 G   | A | 0 |
| 3E-04 | 0  | 0 | 0.3,0.0,0.0,B 0.997          | 1.25     |   | SOMGT:0:15 0/1:2 G   | A | 0 |
|       |    |   |                              |          | 0 | SOMGT:0:17 0/1:2 C   | T | 0 |
|       |    |   | 1,D 3.6 2.41                 |          |   | SOMGT:0:75 0/1:1 C   | T | 0 |
|       |    |   | 0.0,0.9,1.0,D 1.000 5.2 3.52 |          |   | SOMGT:0:42 0/1:6 G   | A | 0 |
|       |    |   | 0,0,0.2,0.0,0.002 1,N        | 1.50     |   | SOMGT:0:70 0/1:1 G   | A | 0 |
|       |    |   |                              |          | 0 | 0 SOMGT:0:9,(0/1:1 A | G | 0 |
|       |    |   |                              |          |   | SOMGT:0:19 0/1:3 C   | T | 0 |
|       |    |   | 0.0,0.0,0.101 1,D            | 6.2 3.93 |   | SOMGT:0:84 0/1:1 C   | A | 0 |
|       | ## | 0 |                              |          |   | SOMGT:0:58 0/1:6 G   | A | 0 |
|       |    |   | 0.1,0.2,0.57,0.952 3.1 2.96  |          |   | SOMGT:0:62 0/1:1 C   | T | 0 |
|       | ## | 0 | 0.0,0.9,1.0,D 1.000 6 5.23   |          |   | SOMGT:0:60 0/1:8 C   | T | 0 |
|       |    |   |                              |          |   | SOMGT:0:18 0/1:3 C   | T | 0 |
|       |    |   | 0.0,1.0,1.0,D 1,D            | 5.9 3.74 |   | SOMGT:0:63 0/1:1 G   | A | 0 |

|                       |                       |              |                     |   |   |
|-----------------------|-----------------------|--------------|---------------------|---|---|
| ##                    | 0 0.0 0.9 1.0,D 0.999 | 5.2 4.81     | SOMGT:0:29 0/1:2 G  | A | 0 |
|                       |                       |              | SOMGT:0:26 0/1:2 G  | A | 0 |
| ##                    | 0                     | 1.41         | SOMGT:0:71 0/1:2 C  | T | 0 |
|                       |                       |              | SOMGT:0:26 0/1:2 G  | A | 0 |
| 0 0                   |                       | 0            | SOMGT:0:63 0/1:2 C  | T | 0 |
|                       |                       |              | SOMGT:0:23 0/1:2 G  | A | 0 |
|                       | 0.0 1.0 1.0,D 1,D     | 5.3 4.47     | SOMGT:0:12 0/1:2 C  | T | 0 |
|                       | 0.1 0.0 0.024 1,D     | 5.9 2.74     | SOMGT:0:15 0/1:2 G  | A | 0 |
|                       |                       | 1,D 5.5 13.0 | SOMGT:0:95 0/1:2 G  | A | 0 |
|                       |                       | 0            | SOMGT:0:12 0/1:2 A  | G | 0 |
|                       |                       |              | SOMGT:0:10 0/1:2 G  | C | 0 |
|                       |                       |              | SOMGT:0:8,0 0/1:2 C | T | 0 |
|                       |                       |              | SOMGT:0:65 0/1:2 C  | T | 0 |
| 0 0                   |                       | 0 0          | SOMGT:0:13 0/1:2 C  | T | 0 |
|                       |                       | 0 0.2        | SOMGT:0:9,0 0/1:2 G | A | 0 |
|                       |                       |              | SOMGT:0:9,0 0/1:2 G | C | 0 |
|                       |                       | 0            | SOMGT:0:11 0/1:2 A  | G | 0 |
|                       |                       |              | SOMGT:0:36 0/1:2 A  | C | 0 |
|                       | 0.0 0.0 0.745 1,N     |              | SOMGT:0:13 0/1:2 G  | A | 0 |
| ##                    | 0 0.0 0.0 0.003 1.000 |              | SOMGT:0:25 0/1:2 G  | A | 0 |
|                       |                       |              | SOMGT:0:10 0/1:2 G  | T | 0 |
|                       |                       | 3.5          | SOMGT:0:93 0/1:2 G  | T | 0 |
|                       |                       | 3.7          | SOMGT:0:23 0/1:2 C  | A | 0 |
|                       |                       |              | SOMGT:0:36 0/1:2 T  | C | 0 |
|                       |                       | 1.82         | SOMGT:0:70 0/1:2 G  | A | 0 |
|                       |                       |              | SOMGT:0:17 0/1:2 A  | G | 0 |
| ##                    | 0 1.0 0.0 0.019 1,N   |              | SOMGT:0:10 0/1:2 G  | A | 0 |
|                       |                       |              | SOMGT:0:26 0/1:2 G  | A | 0 |
| 0 0                   |                       | 4.6          | SOMGT:0:26 0/1:2 A  | G | 0 |
|                       |                       |              | SOMGT:0:31 0/1:2 G  | A | 0 |
|                       | 0.0 1.0 1.0,D 1,D     | 5.7 4.59     | SOMGT:0:46 0/1:2 C  | T | 0 |
|                       |                       |              | SOMGT:0:13 0/1:2 C  | T | 0 |
| 4E-04 0 0             |                       |              | SOMGT:0:63 0/1:2 C  | T | 0 |
|                       |                       |              | SOMGT:0:19 0/1:2 C  | T | 0 |
|                       |                       |              | SOMGT:0:36 0/1:2 A  | G | 0 |
| 0 0 0.3 0.0 0.006 1,N |                       | 1.43         | SOMGT:0:14 0/1:2 G  | A | 0 |
|                       |                       | 0 0          | SOMGT:0:12 0/1:2 A  | G | 0 |
|                       |                       | 6.1 2.42     | SOMGT:0:23 0/1:2 A  | G | 0 |
|                       | 0.4 0.0 0.0,B 1,N     | 4.4          | SOMGT:0:52 0/1:2 C  | T | 0 |
|                       |                       | 0 0          | SOMGT:0:35 0/1:2 C  | T | 0 |
| ##                    | 0 0.0 0.4 0.977 0.898 | 2.2 3.05     | SOMGT:0:94 0/1:2 C  | T | 0 |
|                       |                       | 0 0          | SOMGT:0:78 0/1:2 G  | A | 0 |
|                       |                       |              | SOMGT:0:11 0/1:2 G  | A | 0 |
|                       |                       | 1.27         | SOMGT:0:24 0/1:2 A  | G | 0 |
|                       | 0.0 0.2 0.918 0.999   | 5.1 3.26     | SOMGT:0:86 0/1:2 C  | T | 0 |
| ##                    | 0 0.3 0.0 0.023 0.991 | 5.8          | SOMGT:0:10 0/1:2 C  | T | 0 |
|                       |                       |              | SOMGT:0:12 0/1:2 G  | T | 0 |
|                       |                       |              | SOMGT:0:69 0/1:2 G  | T | 0 |
|                       |                       | 2.8          | SOMGT:0:82 0/1:2 C  | T | 0 |
|                       |                       | 2.8          | SOMGT:0:73 0/1:2 C  | T | 0 |
|                       |                       | 0 0          | SOMGT:0:90 0/1:2 C  | T | 0 |
|                       |                       |              | SOMGT:0:19 0/1:2 C  | A | 0 |
|                       | 0.1 0.0 0.02,1 1.000  |              | SOMGT:0:48 0/1:2 G  | A | 0 |
|                       |                       | 0            | SOMGT:0:17 0/1:2 C  | T | 0 |

|       |    |     |     |       |       |       |      |         |                     |                  |   |   |
|-------|----|-----|-----|-------|-------|-------|------|---------|---------------------|------------------|---|---|
| ##    | 0  |     |     |       |       |       |      |         | SOMGT:0:35 0/1:C    | T                | 0 |   |
|       |    |     |     |       |       |       |      |         | SOMGT:0:16 0/1:A    | G                | 0 |   |
| ##    | 0  |     |     |       |       |       |      |         | SOMGT:0:56 0/1:C    | T                | 0 |   |
|       |    | 0.0 | 0.9 | 0.995 | 1,D   | 5.2   | 4.96 |         | SOMGT:0:69 0/1:G    | T                | 0 |   |
|       |    |     |     |       |       |       |      |         | SOMGT:0:36 0/1:C    | A                | 0 |   |
|       |    |     |     |       |       |       |      |         | SOMGT:0:8,0/1:C     | T                | 0 |   |
|       |    |     |     |       |       |       |      |         | SOMGT:0:69 0/1:T    | C                | 0 |   |
|       |    |     |     |       |       |       |      |         | SOMGT:0:64 0/1:C    | T                | 0 |   |
| ##    | 0  |     |     |       |       |       |      | 0 0     | SOMGT:0:67 0/1:C    | T                | 0 |   |
| ##    | 0  | 0.7 | 0.3 | 0.86  | 1,D   | 5.5   | 3.10 | 0       | SOMGT:0:59 0/1:G    | A                | 0 |   |
|       |    |     |     |       |       |       |      |         | SOMGT:0:68 0/1:C    | A                | 0 |   |
| ##    | 0  | 0.2 | 0.0 | 0.006 | 1.000 | 2.8   |      | 0       | SOMGT:0:11 0/1:C    | T                | 0 |   |
|       |    |     |     |       |       |       |      |         | SOMGT:0:52 0/1:C    | T                | 0 |   |
| ##    | 0  |     |     |       |       | 4.8   |      |         | SOMGT:0:63 0/1:C    | T                | 0 |   |
| ##### | ## | 0   | 0.0 | 0.9   | 0.999 | 1,D   | 6    | 4.62    | 0                   | SOMGT:0:57 0/1:G | A | 0 |
|       |    |     | 0.0 | 0.9   | 1.0,D | 1,D   | 4.9  | 4.69    |                     | SOMGT:0:82 0/1:C | T | 0 |
|       |    |     |     |       |       | 2.4   | 2.14 |         |                     | SOMGT:0:94 0/1:T | C | 0 |
|       |    |     |     |       |       |       |      |         |                     | SOMGT:0:98 0/1:C | T | 0 |
|       |    |     |     |       |       |       |      | 0       | DB;SOMGT:0:41 0/1:C | T                | 0 |   |
|       |    |     |     |       |       |       |      | 0 0     | DB;SOMGT:0:23 0/1:T | C                | 0 |   |
|       |    |     |     |       |       |       |      | 0 0     | DB;SOMGT:0:21 0/1:C | T                | 0 |   |
| ##    | 0  | 0.7 | 0.0 | 0.005 | 1.000 | 2.06  |      |         | SOMGT:0:56 0/1:G    | A                | 0 |   |
|       |    |     |     |       |       |       |      |         | SOMGT:0:64 0/1:G    | A                | 0 |   |
|       |    |     | 0.1 | 0.0   | 0.032 | 1.000 |      |         | SOMGT:0:96 0/1:G    | A                | 0 |   |
|       |    |     |     |       |       |       |      |         | SOMGT:0:85 0/1:C    | T                | 0 |   |
|       |    |     |     |       |       |       |      |         | SOMGT:0:80 0/1:C    | T                | 0 |   |
|       |    |     | 0.1 | 0.0   | 0.041 | 1,N   | 3    | 3.01    |                     | SOMGT:0:10 0/1:C | T | 0 |
| 0.094 |    |     |     |       |       |       |      | 0.1 0.1 | DB;SOMGT:0:35 0/1:G | A                | 0 |   |
|       |    |     |     |       |       |       |      |         | SOMGT:0:47 0/1:G    | A                | 0 |   |
|       |    |     | 0.4 | 0.6   | 0.94  | 1,N   | 3.02 |         | SOMGT:0:46 0/1:C    | T                | 0 |   |
|       |    |     | 0.3 | 0.0   | 0.047 | 1,N   | 2.7  |         | SOMGT:0:18 0/1:A    | G                | 0 |   |
|       |    |     |     |       |       |       |      |         | SOMGT:0:58 0/1:G    | T                | 0 |   |
| ##    | 0  | 0.8 | 0.0 | 0.016 | 1,D   |       |      | 0       | SOMGT:0:10 0/1:G    | A                | 0 |   |
|       | 0  | 0   | 0.9 | 0.0   | 0.007 | 0.886 | 3.7  |         | SOMGT:0:71 0/1:C    | T                | 0 |   |
|       |    |     | 0.1 | 0.4   | 0.389 | 1,N   |      |         | SOMGT:0:68 0/1:G    | T                | 0 |   |
|       |    |     | 0.0 | 0.9   | 1.0,D | 0.984 | 4.5  | 1.94    |                     | SOMGT:0:15 0/1:C | T | 0 |
| 0.002 | 0  | 0   |     |       |       |       |      |         | DB;SOMGT:0:67 0/1:C | T                | 0 |   |
|       |    |     |     |       |       |       |      |         | SOMGT:0:61 0/1:G    | A                | 0 |   |
| ##    | 0  | 0.0 | 0.9 | 0.999 | 0.999 | 4     | 3.94 |         | SOMGT:0:43 0/1:C    | T                | 0 |   |
|       |    |     |     |       |       |       |      |         | SOMGT:0:63 0/1:C    | A                | 0 |   |
|       |    |     |     |       |       | 1.39  |      |         | DB;SOMGT:0:56 0/1:C | T                | 0 |   |
|       |    |     | 0.0 | 0.9   | 1.0,D | 1,D   | 4.5  | 4.54    |                     | SOMGT:0:35 0/1:C | A | 0 |
|       |    |     |     |       |       | 2.9   |      |         | SOMGT:0:43 0/1:C    | T                | 0 |   |
| ##    | 0  | 0.4 | 0.0 | 0.001 | 1.000 | 3.5   |      |         | SOMGT:0:70 0/1:G    | A                | 0 |   |
|       |    |     |     |       |       |       |      |         | SOMGT:0:10 0/1:T    | C                | 0 |   |
| ##### | ## | 0   |     |       |       |       |      | 0       | SOMGT:0:12 0/1:C    | T                | 0 |   |
|       |    |     |     |       |       |       |      | 0       | SOMGT:0:18 0/1:C    | T                | 0 |   |
|       |    |     |     |       |       | 2.1   |      |         | SOMGT:0:87 0/1:G    | A                | 0 |   |
|       |    |     | 0.0 | 0.9   | 0.999 | 0.535 | 3.45 |         | SOMGT:0:60 0/1:C    | A                | 0 |   |
|       |    |     |     |       |       |       |      |         | SOMGT:0:10 0/1:G    | A                | 0 |   |
|       |    |     |     |       |       |       |      | 0       | DB;SOMGT:0:51 0/1:C | T                | 0 |   |
|       |    |     |     |       |       |       |      |         | SOMGT:0:11 0/1:G    | A                | 0 |   |
|       |    |     |     |       |       |       |      |         | SOMGT:0:12 0/1:C    | T                | 0 |   |
| ##    | 0  |     |     |       |       |       |      |         | SOMGT:0:21 0/1:C    | T                | 0 |   |

|       |    |   |     |     |      |      |      |          |                    |                       |   |   |
|-------|----|---|-----|-----|------|------|------|----------|--------------------|-----------------------|---|---|
| .     | .  | . | .   | .   | .    | .    | .    | .        | SOMGT:0:21 0/1:z C | A                     | 0 |   |
| .     | .  | . | .   | .   | .    | .    | .    | .        | SOMGT:0:14 0/1:z C | T                     | 0 |   |
| .     | .  | . | .   | .   | .    | .    | .    | .        | SOMGT:0:23 0/1:z A | T                     | 0 |   |
| .     | 0  | 0 | 0.0 | 0.9 | 0.99 | 0.99 | €    | 2.73     | 0                  | SOMGT:0:43 0/1:z G    | A | 0 |
| .     | .  | . | .   | .   | .    | .    | .    | .        | SOMGT:0:10 0/1:z G | A                     | 0 |   |
| ##### | ## | 0 | 0.0 | 1.0 | 1.0  | D    | 0.99 | 4.3 5.25 | .                  | SOMGT:0:28 0/1:z C    | T | 0 |
| .     | .  | . | .   | .   | .    | .    | .    | 3.2      | .                  | SOMGT:0:57 0/1:z C    | A | 0 |
| .     | .  | . | .   | .   | .    | .    | .    | .        | .                  | SOMGT:0:35 0/1:z G    | A | 0 |
| .     | .  | . | .   | .   | .    | .    | .    | .        | .                  | SOMGT:0:17 0/1:z C    | A | 0 |
| .     | .  | . | .   | .   | .    | .    | .    | .        | .                  | SOMGT:0:15 0/1:z C    | A | 0 |
| .     | .  | . | .   | .   | .    | .    | .    | .        | .                  | SOMGT:0:15 0/1:z C    | T | 0 |
| 2E-04 | 0  | 0 | .   | .   | .    | .    | .    | .        | 0 0.1              | DB;SOMGT:0:37 0/1:z G | A | 0 |
| .     | .  | . | 0.0 | 0.9 | 1.0  | D    | 1.00 | 4.6 2.46 | .                  | SOMGT:0:42 0/1:z G    | T | 0 |
| .     | .  | . | .   | .   | .    | .    | .    | 3 2.07   | .                  | SOMGT:0:21 0/1:z C    | T | 0 |
| .     | .  | . | .   | .   | .    | .    | .    | .        | .                  | SOMGT:0:26 0/1:z T    | C | 0 |
| .     | .  | . | 0.7 | 0.2 | 0.80 | 4    | 1,N  | 2.47     | .                  | SOMGT:0:53 0/1:z A    | T | 0 |
| .     | ## | 0 | 0.0 | 0.9 | 1.0  | D    | 1,D  | 5 5.02   | .                  | SOMGT:0:38 0/1:z T    | C | 0 |
| 0.003 | 0  | 0 | .   | .   | .    | .    | .    | .        | .                  | SOMGT:0:33 0/1:z A    | G | 0 |
| .     | .  | . | 0.0 | 0.9 | 0.99 | €    | 1,D  | 5.8 4.12 | .                  | SOMGT:0:33 0/1:z A    | G | 0 |
| .     | .  | . | .   | .   | .    | .    | .    | .        | .                  | SOMGT:0:59 0/1:z A    | G | 0 |
| ##### | 0  | 0 | 0.1 | 0.7 | 0.99 |      | 1,N  | 3.04     | .                  | SOMGT:0:62 0/1:z G    | A | 0 |
| .     | .  | . | .   | .   | .    | .    | .    | .        | .                  | SOMGT:0:11 0/1:z G    | T | 0 |
| .     | .  | . | .   | .   | .    | .    | .    | .        | 0                  | SOMGT:0:56 0/1:z G    | A | 0 |
| .     | ## | 0 | .   | .   | .    | .    | .    | 1.99     | .                  | SOMGT:0:27 0/1:z G    | A | 0 |
| .     | ## | 0 | .   | .   | .    | .    | .    | .        | .                  | SOMGT:0:25 0/1:z C    | T | 0 |
| .     | .  | . | 0.7 | 0.9 | 1.0  | D    | 1.00 | 5.9 3.84 | .                  | SOMGT:0:27 0/1:z G    | A | 0 |
| .     | .  | . | .   | .   | .    | .    | .    | .        | .                  | SOMGT:0:9,(0/1:z G    | A | 0 |
| .     | .  | . | .   | .   | .    | .    | .    | .        | .                  | SOMGT:0:19 0/1:z G    | A | 0 |
| .     | .  | . | .   | .   | .    | .    | .    | .        | .                  | SOMGT:0:65 0/1:z A    | G | 0 |
| .     | .  | . | .   | .   | .    | .    | .    | .        | .                  | SOMGT:0:13 0/1:z C    | T | 0 |
| .     | .  | . | .   | .   | .    | .    | .    | .        | .                  | SOMGT:0:13 0/1:z G    | A | 0 |
| .     | .  | . | .   | .   | .    | .    | .    | .        | 0                  | SOMGT:0:40 0/1:z G    | A | 0 |
| .     | .  | . | 0.1 | 0.0 | 0.02 | 5    | 1,N  | .        | 0                  | SOMGT:0:46 0/1:z G    | A | 0 |
| ##### | ## | 0 | .   | .   | .    | .    | .    | .        | .                  | SOMGT:0:47 0/1:z G    | A | 0 |
| .     | .  | . | .   | .   | .    | .    | .    | .        | .                  | SOMGT:0:22 0/1:z C    | A | 0 |
| .     | .  | . | .   | .   | .    | .    | .    | .        | .                  | SOMGT:0:53 0/1:z G    | A | 0 |
| .     | .  | . | .   | .   | .    | .    | .    | .        | .                  | SOMGT:0:12 0/1:z C    | A | 0 |
| 5E-04 | 0  | 0 | 0.3 | 0.7 | 0.99 | €    | 1,D  | 6 2.56   | 0                  | SOMGT:0:28 0/1:z G    | A | 0 |
| .     | .  | . | .   | .   | .    | .    | .    | 3.6 1.58 | .                  | SOMGT:0:8,(0/1:z A    | G | 0 |
| .     | .  | . | .   | .   | .    | .    | .    | .        | 0                  | SOMGT:0:11 0/1:z G    | A | 0 |
| .     | .  | . | .   | .   | .    | .    | .    | .        | .                  | SOMGT:0:13 0/1:z A    | G | 0 |
| .     | ## | 0 | .   | .   | .    | .    | .    | .        | 0 0                | SOMGT:0:56 0/1:z C    | T | 0 |
| .     | .  | . | 0.0 | 0.9 | 0.99 | €    | 1,D  | 6.2 5.20 | .                  | SOMGT:0:48 0/1:z C    | T | 0 |
| .     | .  | . | .   | .   | .    | .    | .    | .        | .                  | SOMGT:0:63 0/1:z G    | A | 0 |
| 2E-04 | ## | 0 | 0.0 | 0.9 | 1.0  | D    | 1,D  | 5.2 4.17 | .                  | SOMGT:0:10 0/1:z C    | T | 0 |
| .     | .  | . | 0.0 | 0.9 | 1.0  | D    | 1,D  | 4.4 3.97 | .                  | SOMGT:0:37 0/1:z C    | A | 0 |
| .     | .  | . | .   | .   | .    | .    | .    | .        | .                  | SOMGT:0:31 0/1:z C    | A | 0 |
| .     | ## | 0 | .   | .   | .    | .    | .    | 2.1 1.45 | .                  | SOMGT:0:28 0/1:z A    | G | 0 |
| .     | 0  | 0 | .   | .   | .    | .    | .    | .        | .                  | SOMGT:0:70 0/1:z A    | G | 0 |
| .     | .  | . | .   | .   | .    | .    | .    | .        | .                  | SOMGT:0:21 0/1:z A    | G | 0 |
| .     | .  | . | .   | .   | .    | .    | .    | .        | .                  | SOMGT:0:14 0/1:z C    | T | 0 |
| .     | .  | . | .   | .   | .    | .    | .    | 2.57     | .                  | SOMGT:0:38 0/1:z A    | G | 0 |
| .     | .  | . | .   | .   | .    | .    | .    | .        | .                  | SOMGT:0:39 0/1:z A    | G | 0 |
| .     | ## | 0 | 0.0 | 0.9 | 1.0  | D    | 1.00 | 5.2 4.83 | 0                  | SOMGT:0:43 0/1:z C    | T | 0 |



|       |    |   |     |     |       |        |                      |                      |   |   |
|-------|----|---|-----|-----|-------|--------|----------------------|----------------------|---|---|
|       |    |   |     | 4.4 | 1.39  |        | SOMGT:0:18 0/1:3 C   | T                    | 0 |   |
|       |    |   |     |     | 1.28  |        | SOMGT:0:43 0/1:3 C   | T                    | 0 |   |
|       |    |   |     |     |       |        | SOMGT:0:17 0/1:3 C   | T                    | 0 |   |
|       |    |   |     |     |       |        | SOMGT:0:8,(0/1:3 C   | T                    | 0 |   |
|       |    |   |     |     | 1.59  |        | SOMGT:0:10 0/1:3 G   | A                    | 0 |   |
| ##### | ## |   |     | 1,A | 3.9   | 12.2   | 0 SOMGT:0:48 0/1:3 G | A                    | 0 |   |
|       | ## | 0 | 0.1 | 0.0 | 0.06  | 0.723  | 3.9 3.01             | SOMGT:0:21 0/1:3 G   | A | 0 |
|       |    |   |     |     |       |        |                      | SOMGT:0:40 0/1:3 G   | T | 0 |
|       |    |   |     |     | 2.29  |        |                      | SOMGT:0:17 0/1:3 T   | G | 0 |
|       | ## | 0 | 0.0 | 0.3 | 0.912 | 0.99   | 5.8 3.59             | SOMGT:0:52 0/1:3 C   | T | 0 |
|       |    |   |     |     |       |        |                      | SOMGT:0:11 0/1:3 G   | A | 0 |
|       |    |   |     |     |       |        |                      | SOMGT:0:38 0/1:3 G   | A | 0 |
|       |    |   |     |     |       |        |                      | SOMGT:0:37 0/1:3 C   | T | 0 |
|       | ## | 0 | 0.0 | 0.8 | 0.99  | 1,D    | 4.8 4.65             | SOMGT:0:65 0/1:3 G   | A | 0 |
| ##### | ## | 0 | 0.0 | 1.0 | 1.0   | D 1,D  | 4.9 4.09             | SOMGT:0:47 0/1:3 C   | T | 0 |
|       |    |   |     |     |       |        |                      | SOMGT:0:56 0/1:3 C   | T | 0 |
|       |    |   | 0.0 | 0.9 | 1.0   | D 0.99 | 5.6 4.37             | SOMGT:0:12 0/1:3 G   | A | 0 |
|       |    |   |     |     |       |        | 3 2.85               | SOMGT:0:60 0/1:3 A   | G | 0 |
|       |    |   |     |     |       |        |                      | 0 SOMGT:0:15 0/1:3 C | T | 0 |
|       |    |   |     |     |       |        |                      | SOMGT:0:36 0/1:3 C   | A | 0 |
|       |    |   |     |     |       |        |                      | SOMGT:0:17 0/1:3 G   | A | 0 |
|       |    |   |     |     |       |        |                      | SOMGT:0:17 0/1:3 T   | G | 0 |
|       |    |   |     |     |       |        |                      | SOMGT:0:18 0/1:3 C   | T | 0 |
|       |    |   | 0.0 | 0.4 | 0.822 | 0.954  | 3.9 1.76             | SOMGT:0:70 0/1:3 C   | T | 0 |
|       |    |   |     |     |       |        |                      | SOMGT:0:9,(0/1:3 T   | A | 0 |
|       |    |   |     |     |       |        |                      | SOMGT:0:42 0/1:3 A   | G | 0 |
|       | ## | 0 |     |     |       |        |                      | 0 SOMGT:0:55 0/1:3 G | A | 0 |
|       |    |   |     |     |       |        |                      | SOMGT:0:67 0/1:3 C   | T | 0 |
| 5E-04 | 0  | 0 |     |     |       |        | 1.65                 | SOMGT:0:31 0/1:3 C   | T | 0 |
|       |    |   | 0.0 | 0.9 | 1.0   | D 1,D  | 3.8 4.93             | SOMGT:0:53 0/1:3 C   | T | 0 |
|       |    |   |     |     |       |        | 1.50                 | SOMGT:0:63 0/1:3 G   | A | 0 |
|       |    |   |     |     |       |        | 1.46                 | SOMGT:0:57 0/1:3 G   | T | 0 |
|       |    |   |     |     |       |        |                      | SOMGT:0:24 0/1:3 C   | T | 0 |
|       | 0  | 0 |     |     |       |        |                      | SOMGT:0:36 0/1:3 C   | T | 0 |
|       |    |   | 0.6 | 0.0 | 0.001 | 1,N    |                      | SOMGT:0:81 0/1:3 G   | T | 0 |
|       |    |   |     |     |       |        | 2.8                  | SOMGT:0:15 0/1:3 G   | A | 0 |
|       | ## | 0 |     |     |       |        |                      | SOMGT:0:37 0/1:3 G   | A | 0 |
|       |    |   |     |     |       |        |                      | SOMGT:0:19 0/1:3 G   | A | 0 |
|       |    |   |     |     |       |        |                      | SOMGT:0:44 0/1:3 T   | C | 0 |
|       |    |   |     |     |       |        |                      | SOMGT:0:21 0/1:3 G   | T | 0 |
|       |    |   |     |     |       |        |                      | SOMGT:0:12 0/1:3 C   | A | 0 |
|       |    |   |     |     |       |        | 3.2 2.43             | SOMGT:0:29 0/1:3 G   | T | 0 |
|       |    |   |     |     |       |        |                      | SOMGT:0:19 0/1:3 G   | A | 0 |
|       | ## | 0 |     |     |       |        |                      | SOMGT:0:16 0/1:3 C   | T | 0 |
| ##### | ## | 0 | 0.1 | 0.0 | 0.008 | 1,N    |                      | SOMGT:0:46 0/1:3 G   | A | 0 |
|       |    |   | 0.1 | 0.2 | 0.687 | 1.00   | 4.7 1.29             | SOMGT:0:56 0/1:3 A   | G | 0 |
|       |    |   |     |     |       |        |                      | SOMGT:0:86 0/1:3 G   | T | 0 |
|       |    |   |     |     |       |        |                      | SOMGT:0:24 0/1:3 G   | A | 0 |
|       | 0  | 0 |     |     |       |        |                      | SOMGT:0:51 0/1:3 G   | A | 0 |
|       | 0  | 0 |     |     |       |        |                      | SOMGT:0:75 0/1:3 G   | A | 0 |
|       |    |   |     |     |       |        |                      | SOMGT:0:93 0/1:3 T   | C | 0 |
|       |    |   |     |     |       |        |                      | SOMGT:0:28 0/1:3 G   | A | 0 |
|       |    |   | 0.0 | 0.9 | 1.0   | D 1.00 | 3.2 1.94             | SOMGT:0:95 0/1:3 C   | T | 0 |
| 2E-04 | ## | 0 |     |     |       |        |                      | 0 SOMGT:0:23 0/1:3 C | T | 0 |

|       |    |     |       |       |       |       |       |       |                       |   |   |
|-------|----|-----|-------|-------|-------|-------|-------|-------|-----------------------|---|---|
| .     | .  | .   | .     | .     | .     | .     | .     | .     | SOMGT:0:10 0/1:z A    | G | 0 |
| .     | .  | .   | .     | .     | .     | .     | .     | .     | SOMGT:0:48 0/1:z C    | T | 0 |
| .     | .  | .   | .     | .     | .     | .     | .     | .     | SOMGT:0:51 0/1:z G    | A | 0 |
| .     | .  | .   | .     | .     | .     | .     | .     | .     | SOMGT:0:72 0/1:z G    | T | 0 |
| .     | .  | .   | .     | .     | .     | .     | .     | .     | SOMGT:0:19 0/1:z G    | A | 0 |
| .     | .  | .   | .     | .     | .     | .     | .     | .     | SOMGT:0:8, (0/1:z T   | C | 0 |
| .     | .  | 0.1 | 0.0   | 0.027 | 1,N   | 4.8   | .     | .     | SOMGT:0:83 0/1:z T    | C | 0 |
| .     | .  | .   | .     | .     | .     | .     | .     | .     | SOMGT:0:39 0/1:z G    | A | 0 |
| .     | .  | .   | .     | .     | .     | .     | .     | .     | SOMGT:0:26 0/1:z C    | T | 0 |
| .     | .  | .   | .     | .     | .     | 3.4   | 1.62. | .     | SOMGT:0:65 0/1:z G    | A | 0 |
| 0.012 | 0  | 0   | .     | .     | .     | 3.9   | .     | 0 0   | DB;SOMGT:0:10 0/1:z C | T | 0 |
| .     | .  | .   | .     | .     | 1,D   | 5.4   | 16.1. | .     | SOMGT:0:83 0/1:z G    | A | 0 |
| .     | .  | 0.7 | 0.0   | 0.024 | 0.991 | 5.2   | .     | .     | SOMGT:0:13 0/1:z C    | T | 0 |
| 0.005 | 0  | 0   | 0.1   | 0.0   | 0.008 | 1,N   | 1.50  | 0.    | DB;SOMGT:0:73 0/1:z C | T | 0 |
| .     | ## | 0   | .     | .     | .     | .     | .     | 0 0   | SOMGT:0:37 0/1:z C    | T | 0 |
| .     | .  | 0.9 | 0.999 | .     | .     | 5.7   | 5.19. | .     | SOMGT:0:79 0/1:z G    | A | 0 |
| .     | ## | 0   | 0.0   | 0.9   | 1.0,D | 1,D   | 4.7   | 5.02. | SOMGT:0:20 0/1:z C    | T | 0 |
| .     | .  | 0.0 | 1.0,  | 1.0,D | 1,D   | 4.9   | 4.04. | .     | SOMGT:0:47 0/1:z C    | A | 0 |
| .     | .  | .   | .     | .     | .     | 3.1   | 3.01. | .     | SOMGT:0:21 0/1:z G    | A | 0 |
| .     | .  | .   | .     | .     | .     | .     | .     | .     | SOMGT:0:10 0/1:z G    | A | 0 |
| .     | ## | 0   | 0.0   | 0.1   | 0.549 | 1,D   | 3.2   | 2.63. | SOMGT:0:14 0/1:z G    | A | 0 |
| .     | .  | 0.3 | .     | .     | 0.992 | 2.7   | 1.67. | .     | SOMGT:0:64 0/1:z G    | A | 0 |
| .     | .  | .   | .     | .     | .     | .     | .     | .     | SOMGT:0:21 0/1:z G    | T | 0 |
| .     | .  | .   | .     | .     | .     | .     | .     | .     | SOMGT:0:55 0/1:z C    | T | 0 |
| .     | .  | .   | .     | .     | .     | .     | .     | .     | SOMGT:0:41 0/1:z G    | T | 0 |
| .     | .  | .   | .     | .     | .     | .     | .     | .     | SOMGT:0:35 0/1:z C    | A | 0 |
| .     | .  | .   | .     | .     | .     | .     | .     | .     | SOMGT:0:59 0/1:z A    | C | 0 |
| 0.006 | 0  | 0   | 0.0   | 0.9   | 1.0,D | 1,D   | 5.8   | 5.04. | DB;SOMGT:0:96 0/1:z G | A | 0 |
| .     | .  | 0.4 | 0.0   | 0.002 | 1.000 | 5.6   | 2.60. | .     | SOMGT:0:31 0/1:z A    | G | 0 |
| .     | .  | .   | .     | .     | .     | .     | .     | .     | SOMGT:0:16 0/1:z A    | T | 0 |
| .     | .  | .   | .     | .     | .     | 1.90. | .     | .     | SOMGT:0:19 0/1:z C    | A | 0 |
| .     | .  | .   | .     | .     | .     | .     | .     | .     | SOMGT:0:69 0/1:z C    | T | 0 |
| .     | .  | 0.0 | 0.9   | 1.0,D | 1,D   | 5.4   | 4.86. | .     | SOMGT:0:52 0/1:z C    | T | 0 |
| .     | .  | 0.1 | 0.0   | 0.703 | 0.630 | 2.3   | 2.96. | .     | SOMGT:0:11 0/1:z G    | A | 0 |
| .     | .  | .   | .     | .     | 1,D   | 3.5   | 11.1. | .     | SOMGT:0:64 0/1:z G    | A | 0 |
| .     | ## | .   | .     | .     | .     | .     | .     | .     | SOMGT:0:75 0/1:z C    | T | 0 |
| .     | .  | 0.0 | 0.9   | 0.999 | 1.000 | 3.5   | .     | .     | SOMGT:0:22 0/1:z T    | C | 0 |
| .     | .  | .   | .     | .     | .     | .     | .     | .     | SOMGT:0:45 0/1:z T    | C | 0 |
| .     | .  | 0.0 | 1.0,  | 1.0,D | 1.000 | 4.4   | 4.35. | .     | SOMGT:0:53 0/1:z T    | G | 0 |
| .     | ## | 0   | 0.0   | 1.0,  | 1.0,D | 0.909 | 3.2   | .     | SOMGT:0:16 0/1:z G    | A | 0 |
| ##### | .  | 1.0 | 0.0   | 0.006 | 1,N   | .     | .     | .     | SOMGT:0:77 0/1:z C    | T | 0 |
| .     | ## | 0   | .     | .     | .     | .     | .     | 0     | SOMGT:0:35 0/1:z C    | T | 0 |
| .     | ## | 0   | 0.0   | 1.0,  | 1.0,D | 1.000 | 5     | 4.11. | SOMGT:0:98 0/1:z G    | A | 0 |
| .     | .  | .   | .     | .     | .     | .     | .     | .     | SOMGT:0:17 0/1:z C    | A | 0 |
| .     | .  | .   | .     | .     | .     | 5.1   | .     | .     | SOMGT:0:14 0/1:z G    | T | 0 |
| .     | ## | 0   | .     | .     | .     | .     | .     | 0     | SOMGT:0:68 0/1:z G    | A | 0 |
| ##### | ## | 0   | 0.0   | 0.2   | 0.928 | 1.000 | 5     | 3.02. | SOMGT:0:67 0/1:z C    | T | 0 |
| ##### | ## | 0   | 0.0   | 0.0   | 0.006 | 0.757 | 3.7   | 1.63. | SOMGT:0:92 0/1:z C    | T | 0 |
| .     | .  | .   | .     | .     | .     | 4.7   | .     | .     | SOMGT:0:15 0/1:z T    | G | 0 |
| .     | ## | 0   | 0.3   | 0.8   | 0.997 | 1,D   | 5.3   | 3.80. | SOMGT:0:34 0/1:z C    | T | 0 |
| 0.023 | 0  | 0   | .     | .     | .     | .     | .     | .     | DB;SOMGT:0:40 0/1:z G | A | 0 |
| .     | .  | .   | .     | .     | .     | .     | .     | .     | SOMGT:0:32 0/1:z T    | A | 0 |
| .     | ## | 0   | 0.0   | 0.0   | 0.218 | 1.000 | 5     | 3.71. | SOMGT:0:45 0/1:z C    | T | 0 |
| .     | ## | 0   | .     | .     | .     | 1.45. | .     | .     | SOMGT:0:86 0/1:z G    | A | 0 |

|       |    |     |     |       |       |         |      |       |                     |   |   |
|-------|----|-----|-----|-------|-------|---------|------|-------|---------------------|---|---|
| 7E-04 | 0  | 0   | .   | .     | .     | .       | .    | .     | SOMGT:0:25 0/1:4 C  | T | 0 |
| .     | .  | .   | .   | .     | .     | .       | .    | .     | SOMGT:0:15 0/1:2 G  | A | 0 |
| .     | .  | 0.2 | 0.0 | 0.0   | B 1,N | .       | .    | .     | SOMGT:0:86 0/1:1 G  | A | 0 |
| .     | .  | .   | .   | .     | .     | 3.1     | .    | .     | SOMGT:0:49 0/1:3 G  | A | 0 |
| ##### | ## | 0   | 0.1 | 0.6   | 0.998 | 0.820   | 2.3  | 4.16  | SOMGT:0:59 0/1:1 G  | A | 0 |
| .     | .  | 0.0 | 0.7 | 0.991 | 0.964 | 3.8     | 3.80 | .     | SOMGT:0:45 0/1:3 G  | A | 0 |
| .     | .  | .   | .   | .     | .     | .       | .    | .     | SOMGT:0:12 0/1:2 T  | G | 0 |
| .     | .  | .   | .   | .     | .     | .       | .    | .     | SOMGT:0:16 0/1:2 G  | A | 0 |
| .     | .  | .   | .   | .     | .     | 2.6     | .    | .     | SOMGT:0:13 0/1:1 C  | T | 0 |
| .     | .  | .   | .   | .     | .     | 2.1     | .    | .     | SOMGT:0:61 0/1:1 C  | T | 0 |
| .     | .  | 0.1 | 0.9 | 0.995 | 0.537 | 2.3     | 2.09 | .     | SOMGT:0:59 0/1:1 C  | T | 0 |
| .     | .  | 0.0 | 0.9 | 0.999 | 1.000 | 5       | 4.68 | .     | SOMGT:0:67 0/1:1 T  | C | 0 |
| .     | .  | .   | .   | .     | .     | .       | .    | .     | SOMGT:0:23 0/1:3 G  | A | 0 |
| .     | .  | .   | .   | .     | .     | .       | .    | 0     | SOMGT:0:52 0/1:3 C  | T | 0 |
| ##### | ## | 0   | .   | .     | .     | .       | 3.28 | .     | SOMGT:0:24 0/1:4 C  | T | 0 |
| .     | ## | 0   | 0.0 | 0.9   | 1.0   | D 1,D   | 4.1  | 3.12  | SOMGT:0:27 0/1:4 C  | T | 0 |
| .     | .  | .   | .   | .     | .     | .       | .    | .     | SOMGT:0:25 0/1:2 G  | A | 0 |
| .     | .  | .   | .   | .     | .     | .       | .    | .     | SOMGT:0:28 0/1:3 A  | G | 0 |
| .     | ## | 0   | 0.0 | 0.9   | 1.0   | D 1.000 | 4.8  | 4.03  | SOMGT:0:74 0/1:1 C  | T | 0 |
| .     | .  | .   | .   | .     | .     | .       | 2.5  | .     | SOMGT:0:59 0/1:1 G  | A | 0 |
| .     | .  | .   | .   | .     | .     | .       | .    | .     | SOMGT:0:28 0/1:3 G  | C | 0 |
| .     | .  | .   | .   | .     | .     | .       | 2.4  | .     | SOMGT:0:39 0/1:3 C  | A | 0 |
| .     | .  | .   | .   | .     | .     | .       | .    | .     | SOMGT:0:38 0/1:3 A  | G | 0 |
| .     | .  | .   | .   | .     | .     | .       | .    | .     | SOMGT:0:19 0/1:2 C  | A | 0 |
| .     | .  | .   | .   | .     | .     | .       | .    | .     | SOMGT:0:22 0/1:2 T  | C | 0 |
| .     | .  | .   | .   | .     | .     | 4.4     | .    | .     | SOMGT:0:36 0/1:3 G  | A | 0 |
| .     | .  | .   | .   | .     | .     | .       | .    | .     | SOMGT:0:19 0/1:3 C  | T | 0 |
| .     | ## | 0   | 0.2 | 0.0   | 0.652 | 1,N     | .    | .     | SOMGT:0:75 0/1:3 G  | A | 0 |
| .     | ## | 0   | 0.1 | 0.0   | 0.096 | 1,N     | 1.64 | .     | SOMGT:0:59 0/1:3 G  | A | 0 |
| .     | ## | 0   | .   | .     | .     | .       | .    | .     | SOMGT:0:29 0/1:3 C  | T | 0 |
| .     | .  | .   | .   | .     | .     | .       | .    | .     | SOMGT:0:11 0/1:2 G  | A | 0 |
| .     | .  | .   | .   | .     | .     | .       | .    | 0 0.1 | SOMGT:0:10 0/1:2 G  | C | 0 |
| .     | .  | .   | .   | .     | .     | .       | .    | .     | SOMGT:0:44 0/1:3 G  | A | 0 |
| .     | .  | 0.0 | 0.9 | 1.0   | D 1,D | 5.6     | 4.14 | .     | SOMGT:0:50 0/1:1 G  | A | 0 |
| .     | .  | .   | .   | .     | .     | .       | .    | .     | SOMGT:0:20 0/1:2 G  | A | 0 |
| .     | 0  | 0   | .   | .     | .     | .       | .    | .     | DB:3GT:0:30 0/1:4 G | A | 0 |
| 4E-04 | 0  | 0   | 0.0 | 0.2   | 0.647 | 1,D     | 5.6  | 3.66  | SOMGT:0:44 0/1:3 G  | A | 0 |
| .     | .  | .   | .   | .     | .     | .       | .    | .     | SOMGT:0:20 0/1:2 G  | A | 0 |
| .     | ## | 0   | 0.0 | 0.2   | 0.284 | 1,D     | 5.3  | 3.64  | SOMGT:0:68 0/1:3 C  | T | 0 |
| .     | .  | .   | .   | .     | .     | .       | 3.9  | 1.89  | SOMGT:0:28 0/1:4 A  | G | 0 |
| .     | .  | .   | .   | .     | .     | .       | 1.33 | .     | SOMGT:0:48 0/1:3 T  | C | 0 |
| .     | .  | .   | .   | .     | .     | .       | 1.75 | .     | SOMGT:0:99 0/1:1 A  | G | 0 |
| .     | .  | .   | .   | .     | .     | .       | .    | .     | SOMGT:0:30 0/1:3 C  | T | 0 |
| .     | .  | .   | .   | .     | .     | 5.8     | 5.38 | .     | SOMGT:0:16 0/1:3 G  | A | 0 |
| .     | .  | .   | .   | .     | .     | .       | .    | .     | SOMGT:0:63 0/1:3 C  | T | 0 |
| .     | ## | 0   | .   | .     | .     | .       | .    | .     | SOMGT:0:35 0/1:3 G  | A | 0 |
| .     | .  | .   | .   | .     | .     | .       | .    | 0     | SOMGT:0:26 0/1:2 T  | G | 0 |
| .     | .  | .   | .   | .     | .     | 4.8     | .    | .     | SOMGT:0:83 0/1:1 C  | T | 0 |
| .     | .  | .   | .   | .     | .     | 2.7     | .    | .     | SOMGT:0:75 0/1:1 C  | A | 0 |
| .     | .  | 0.1 | 0.2 | 0.673 | 0.986 | 4.9     | 3.03 | .     | SOMGT:0:70 0/1:1 C  | T | 0 |
| .     | .  | .   | .   | .     | .     | .       | .    | .     | SOMGT:0:21 0/1:3 G  | T | 0 |
| .     | .  | .   | .   | .     | .     | 2.81    | .    | .     | SOMGT:0:78 0/1:1 C  | A | 0 |
| .     | .  | .   | .   | .     | .     | 4.7     | .    | .     | SOMGT:0:43 0/1:3 G  | A | 0 |
| .     | ## | 0   | .   | .     | .     | .       | .    | .     | SOMGT:0:38 0/1:3 T  | C | 0 |

|       |    |                        |                 |   |                      |   |   |
|-------|----|------------------------|-----------------|---|----------------------|---|---|
|       |    | 0.0 1.0,1.0,D 1,D      | 4.7 4.88.       |   | SOMGT: 0:42 0/1: C   | A | 0 |
| 0.001 | 0  | 0 0.0:0.9 1.0,D 0.83   | 4.3 3.69        | 0 | SOMGT: 0:10 0/1: C   | T | 0 |
| 0.002 | 0  | 0 0.0 0.7 0.81 1,N     | 1.29.           |   | SOMGT: 0:25 0/1: C   | T | 0 |
|       | 0  |                        |                 | 0 | SOMGT: 0:14 0/1: C   | T | 0 |
|       |    |                        | 2.9             |   | SOMGT: 0:58 0/1: C   | A | 0 |
|       |    | 0.0,0.9 0.99 1,D       | 5.5 3.68.       |   | SOMGT: 0:48 0/1: C   | T | 0 |
|       |    | 0.0,1.0,1.0,D 1,D      | 5.4 5.19.       |   | SOMGT: 0:78 0/1: G   | A | 0 |
|       | 0  | 0                      |                 |   | SOMGT: 0:36 0/1: C   | T | 0 |
|       | ## |                        |                 |   | DB: GT: 0:21 0/1: G  | T | 0 |
|       | ## | 0 0.1 1.0,1.0,D 1,D    | 5.9 4.06.       |   | SOMGT: 0:72 0/1: G   | A | 0 |
|       |    | 0.0 0.6 0.56 0.975.    | 3.26.           |   | SOMGT: 0:87 0/1: G   | T | 0 |
|       |    |                        |                 |   | SOMGT: 0:14 0/1: G   | A | 0 |
|       |    |                        |                 |   | SOMGT: 0:9,(0/1: G   | A | 0 |
|       |    |                        |                 |   | SOMGT: 0:22 0/1: C   | T | 0 |
|       |    |                        | 2.              |   | SOMGT: 0:9,(0/1: G   | A | 0 |
|       | ## | 0 0.5 0.1 0.64 2 0.851 | 4.9 3.51.       |   | SOMGT: 0:45 0/1: G   | A | 0 |
|       |    |                        |                 |   | SOMGT: 0:17 0/1: G   | T | 0 |
|       |    |                        | 3.7 1.29.       |   | SOMGT: 0:14 0/1: C   | T | 0 |
| ##### | ## | 0                      |                 | 0 | SOMGT: 0:13 0/1: C   | T | 0 |
|       |    |                        |                 | 0 | 0 SOMGT: 0:43 0/1: G | A | 0 |
|       |    |                        |                 | 0 | 0 SOMGT: 0:17 0/1: C | T | 0 |
|       |    |                        |                 |   | SOMGT: 0:91 0/1: C   | A | 0 |
|       |    |                        | 2.3             |   | SOMGT: 0:28 0/1: G   | T | 0 |
|       |    | 0.0:0.9:0.997 1.000    | 4.9 3.64.       |   | SOMGT: 0:12 0/1: A   | G | 0 |
|       |    | 0.1:0.0 0.04, 1,N      | 2.00.           |   | SOMGT: 0:83 0/1: G   | A | 0 |
|       |    |                        | 3.44.           |   | SOMGT: 0:19 0/1: C   | T | 0 |
|       |    |                        |                 |   | SOMGT: 0:8,(0/1: C   | T | 0 |
|       |    |                        |                 |   | SOMGT: 0:87 0/1: C   | A | 0 |
|       |    |                        | 1.000 2.9 1.47. |   | SOMGT: 0:35 0/1: T   | C | 0 |
|       |    | 0.1:0.0 0.0,B 1,N      |                 |   | SOMGT: 0:57 0/1: T   | A | 0 |
|       |    | 0.1 0.6 0.88 1,D       | 3.1 2.21.       |   | SOMGT: 0:35 0/1: G   | A | 0 |
|       |    |                        | 2.2 1.34.       |   | SOMGT: 0:8,(0/1: A   | G | 0 |
|       |    |                        |                 | 0 | DB: GT: 0:21 0/1: T  | C | 0 |
|       |    |                        |                 |   | SOMGT: 0:64 0/1: C   | A | 0 |
|       |    |                        |                 |   | SOMGT: 0:69 0/1: G   | A | 0 |
|       |    |                        | 2.01.           |   | SOMGT: 0:50 0/1: C   | A | 0 |
|       | ## | 0 0.0 0.9 1.0,D 1,D    | 4.09.           |   | SOMGT: 0:46 0/1: C   | T | 0 |
|       |    | 0.0 0.9:0.99 1,D       | 6 3.76.         |   | SOMGT: 0:51 0/1: T   | C | 0 |
|       | ## | 0                      |                 |   | SOMGT: 0:17 0/1: C   | T | 0 |
|       |    | 0.0 0.9 1.0,D 1.000    | 4 4.05.         |   | SOMGT: 0:39 0/1: C   | T | 0 |
|       |    |                        | 1,A 3.9 7.41.   |   | SOMGT: 0:25 0/1: G   | T | 0 |
|       |    |                        |                 |   | SOMGT: 0:8,(0/1: A   | C | 0 |
|       |    | 0.0,0.8 0.98 0.96      | 3.7 1.94.       |   | SOMGT: 0:27 0/1: A   | G | 0 |
|       |    |                        |                 |   | SOMGT: 0:44 0/1: A   | G | 0 |
|       |    |                        | 3.1 2.96.       |   | SOMGT: 0:36 0/1: C   | T | 0 |
| 4E-04 | ## | 0                      |                 |   | SOMGT: 0:62 0/1: C   | T | 0 |
|       |    |                        |                 |   | SOMGT: 0:36 0/1: C   | T | 0 |
|       |    |                        |                 |   | SOMGT: 0:36 0/1: G   | A | 0 |
|       |    |                        |                 |   | SOMGT: 0:10 0/1: C   | T | 0 |
|       |    |                        |                 |   | SOMGT: 0:9,(0/1: C   | T | 0 |
|       |    |                        |                 |   | SOMGT: 0:13 0/1: C   | T | 0 |
|       |    |                        |                 |   | SOMGT: 0:27 0/1: A   | T | 0 |
|       |    | 0.0:0.0 0.24 1,N       |                 |   | SOMGT: 0:55 0/1: A   | C | 0 |
|       |    |                        |                 |   | SOMGT: 0:36 0/1: C   | T | 0 |

|       |    |                       |          |                      |   |   |
|-------|----|-----------------------|----------|----------------------|---|---|
|       |    | 0.0 0.8 0.98 1,N      | 2.20     | SOMGT:0:15 0/1:2 T   | C | 0 |
|       |    |                       | 1.67     | SOMGT:0:66 0/1:7 G   | A | 0 |
|       | ## | 0 0.0 0.9 1.0,D 1,D   | 4.6 5.03 | SOMGT:0:56 0/1:9 G   | A | 0 |
|       |    |                       |          | SOMGT:0:40 0/1:6 A   | G | 0 |
|       |    |                       | 2.5 3.31 | DB;S GT:0:24 0/1:4 G | A | 0 |
|       |    |                       |          | SOMGT:0:77 0/1:9 G   | A | 0 |
|       |    | 0.0 0.9 0.996 1,D     | 5.7 5.20 | SOMGT:0:34 0/1:5 T   | C | 0 |
|       |    |                       |          | SOMGT:0:58 0/1:7 A   | G | 0 |
|       |    |                       |          | SOMGT:0:45 0/1:7 G   | T | 0 |
| ##### | ## |                       | 0        | SOMGT:0:20 0/1:3 C   | T | 0 |
|       | ## | 0 0.1 0.4 0.995 0.968 |          | SOMGT:0:63 0/1:9 G   | A | 0 |
|       |    |                       | 4.6      | SOMGT:0:69 0/1:7 C   | T | 0 |
|       |    |                       |          | SOMGT:0:38 0/1:6 G   | A | 0 |
|       |    |                       | 2.01     | SOMGT:0:49 0/1:7 C   | T | 0 |
|       |    |                       |          | SOMGT:0:36 0/1:7 G   | A | 0 |
|       |    |                       | 5.3 2.00 | SOMGT:0:14 0/1:2 G   | T | 0 |
| ##### | ## | 0 0.0 0.8 0.991 0.999 | 4.1 4.54 | SOMGT:0:41 0/1:4 C   | T | 0 |
|       | ## | 0 0.0 0.9 1.0,D 1.000 | 4.9 4.81 | SOMGT:0:82 0/1:7 C   | T | 0 |
|       |    |                       | 0        | DB;S GT:0:34 0/1:3 T | A | 0 |
|       |    |                       |          | SOMGT:0:14 0/1:2 G   | C | 0 |
|       |    | 0.0 0.9 0.999 1,D     | 5 4.83   | SOMGT:0:95 0/1:7 G   | A | 0 |
| ##### | ## | 0                     | 0        | SOMGT:0:38 0/1:7 G   | A | 0 |
|       |    |                       |          | SOMGT:0:26 0/1:3 T   | C | 0 |
|       | 0  | 0 0.0 0.0 0.068 1.000 | 3.03     | SOMGT:0:10 0/1:7 G   | A | 0 |
|       |    | 0.1 0.2 0.565 0.999   | 3 2.43   | SOMGT:0:68 0/1:7 T   | G | 0 |
|       | 0  |                       | 3.9      | SOMGT:0:45 0/1:5 C   | T | 0 |
|       |    | 0.0 0.5 0.956 1,D     | 5.2 4.98 | SOMGT:0:56 0/1:7 A   | G | 0 |
|       |    | 0.2 0.0 0.019 1,D     | 4.9 2.97 | SOMGT:0:58 0/1:7 A   | G | 0 |
|       |    | 0.0 0.0 0.003 1,N     |          | SOMGT:0:55 0/1:8 G   | A | 0 |
|       | ## | 0                     | 2.9      | SOMGT:0:50 0/1:9 C   | T | 0 |
|       |    | 0.0 0.9 0.999 1.000   | 5.5 4.78 | SOMGT:0:35 0/1:5 A   | C | 0 |
| ##### | ## | 0 0.4 0.1 0.736 1.000 | 5.9 2.50 | SOMGT:0:30 0/1:3 C   | T | 0 |
|       |    |                       | 1.50     | SOMGT:0:58 0/1:7 G   | T | 0 |
|       |    | 0.2 0.9 0.999 1,D     | 5.1 3.90 | SOMGT:0:37 0/1:6 C   | A | 0 |
|       |    | 0.0 0.9 1.0,D 1,D     | 5.7 4.55 | SOMGT:0:50 0/1:7 G   | T | 0 |
|       | ## | 0                     | 3.1 1.36 | SOMGT:0:59 0/1:6 C   | T | 0 |
|       |    |                       | 0        | SOMGT:0:38 0/1:3 A   | G | 0 |
|       |    | 0.0 0.8 0.997 0.994   | 3.3 2.82 | SOMGT:0:32 0/1:6 G   | T | 0 |
|       |    |                       |          | SOMGT:0:72 0/1:7 C   | T | 0 |
|       |    |                       |          | SOMGT:0:30 0/1:3 G   | A | 0 |
|       | ## | 0 0.0 0.2 0.923 1,D   | 5.7 3.88 | SOMGT:0:58 0/1:8 G   | A | 0 |
|       | ## |                       |          | SOMGT:0:26 0/1:5 G   | A | 0 |
|       |    |                       |          | SOMGT:0:27 0/1:3 T   | C | 0 |
|       | ## | 0 0.5 0.0 0.002 1,N   | 4.1      | SOMGT:0:75 0/1:7 C   | T | 0 |
|       |    |                       |          | SOMGT:0:53 0/1:8 C   | T | 0 |
|       |    |                       |          | SOMGT:0:29 0/1:2 A   | G | 0 |
|       |    |                       | 4.4      | SOMGT:0:23 0/1:4 G   | T | 0 |
|       |    | 0.0 0.9 1.0,D 1,D     | 5.4 4.00 | SOMGT:0:71 0/1:9 G   | T | 0 |
|       |    |                       |          | SOMGT:0:48 0/1:8 G   | A | 0 |
|       |    |                       |          | SOMGT:0:75 0/1:7 C   | T | 0 |
|       |    | 0.2 1.0 1.0,D 1,D     | 6 2.22   | SOMGT:0:23 0/1:5 C   | T | 0 |
|       |    |                       |          | SOMGT:0:13 0/1:7 T   | C | 0 |
|       |    |                       |          | SOMGT:0:19 0/1:3 C   | T | 0 |
|       |    |                       |          | SOMGT:0:9,(0/1:9 G   | T | 0 |

|       |    |     |      |          |                     |                |                     |   |   |
|-------|----|-----|------|----------|---------------------|----------------|---------------------|---|---|
|       |    |     |      | 3.7      |                     |                | SOMGT:0:22 0/1:2 C  | A | 0 |
| ##### | ## | 0   |      |          |                     |                | SOMGT:0:59 0/1:3 G  | A | 0 |
|       | ## | 0   |      |          |                     |                | SOMGT:0:52 0/1:3 C  | T | 0 |
|       |    |     |      |          |                     |                | SOMGT:0:62 0/1:3 T  | G | 0 |
|       |    |     |      |          |                     |                | SOMGT:0:16 0/1:2 A  | G | 0 |
|       |    |     |      | 3.27     |                     |                | SOMGT:0:83 0/1:1 G  | T | 0 |
|       |    |     |      | 3.6      | 2.68                |                | SOMGT:0:18 0/1:2 C  | T | 0 |
|       | 0  | 0   |      | 2.56     |                     |                | SOMGT:0:38 0/1:3 C  | T | 0 |
|       |    | 0.7 | 0.0  | 0.0011,N |                     |                | SOMGT:0:68 0/1:3 A  | T | 0 |
|       |    |     |      |          |                     |                | SOMGT:0:9,(0/1:3 G  | A | 0 |
|       |    |     |      |          |                     |                | SOMGT:0:40 0/1:3 C  | T | 0 |
|       |    |     |      |          |                     |                | SOMGT:0:15 0/1:2 G  | T | 0 |
|       |    |     |      |          |                     |                | SOMGT:0:12 0/1:2 G  | A | 0 |
|       |    |     |      |          |                     |                | SOMGT:0:57 0/1:3 G  | A | 0 |
|       |    |     |      |          |                     |                | SOMGT:0:18 0/1:3 C  | A | 0 |
|       |    |     |      |          |                     |                | SOMGT:0:14 0/1:1 G  | A | 0 |
|       |    |     |      | 2.11     |                     |                | SOMGT:0:22 0/1:3 T  | C | 0 |
| ##### | ## | 0   |      |          |                     |                | SOMGT:0:28 0/1:2 C  | T | 0 |
|       |    |     |      |          |                     |                | SOMGT:0:36 0/1:3 T  | C | 0 |
|       | 0  | 0   |      |          |                     | 0 0            | SOMGT:0:11 0/1:1 G  | A | 0 |
|       |    |     |      | 5.5      | 4.12                |                | SOMGT:0:18 0/1:2 T  | G | 0 |
|       |    |     |      |          |                     |                | SOMGT:0:42 0/1:1 C  | T | 0 |
|       | ## | 0   |      |          |                     |                | SOMGT:0:17 0/1:2 C  | T | 0 |
|       |    | 0.3 | 0.8  | 0.99     | 1,N                 | 4.4 1.24 0 0   | SOMGT:0:40 0/1:1 G  | A | 0 |
|       |    |     |      |          |                     |                | SOMGT:0:39 0/1:3 G  | T | 0 |
|       |    |     |      |          |                     |                | SOMGT:0:13 0/1:2 T  | C | 0 |
|       |    |     |      |          |                     |                | SOMGT:0:46 0/1:3 C  | T | 0 |
|       |    | 0.0 | 0.9  | 0.99     | 1,D                 | 5.8 5.60       | SOMGT:0:57 0/1:3 C  | T | 0 |
|       |    |     |      |          |                     |                | SOMGT:0:65 0/1:1 C  | T | 0 |
|       |    | 0.7 | 0.99 | 1.00     | 5.2 4.36            |                | SOMGT:0:34 0/1:2 G  | T | 0 |
|       | ## | 0   | 0.0  | 0.7      | 0.95                | 1,D 4.9 4.00 0 | SOMGT:0:26 0/1:3 G  | A | 0 |
|       |    |     |      |          |                     |                | SOMGT:0:29 0/1:3 G  | A | 0 |
|       | ## | 0   |      |          |                     |                | SOMGT:0:57 0/1:3 G  | A | 0 |
|       |    |     |      | 4.7      | 1.34                |                | SOMGT:0:18 0/1:2 T  | C | 0 |
|       |    | 0.3 | 0.35 | 2 1,D    | 5.9 3.74            |                | SOMGT:0:27 0/1:3 G  | T | 0 |
|       |    |     |      |          |                     |                | SOMGT:0:29 0/1:3 T  | G | 0 |
|       |    |     |      |          |                     |                | SOMGT:0:36 0/1:1 C  | T | 0 |
|       |    | 0.0 | 0.0  | 0.01     | 3 1,N 2.1 3.35      |                | SOMGT:0:57 0/1:1 C  | T | 0 |
|       |    | 0.0 | 0.9  | 0.99     | 1,D 5.5 2.69        |                | SOMGT:0:54 0/1:3 T  | C | 0 |
|       | ## | 1.0 | 0.1  | 0.84     | 1.0 0.99 4.1 1.69   |                | DB:3GT:0:26 0/1:3 C | T | 0 |
|       |    |     |      |          |                     |                | SOMGT:0:9,(0/1:1 G  | A | 0 |
|       |    |     |      |          |                     |                | SOMGT:0:9,(0/1:1 G  | A | 0 |
|       |    |     |      |          |                     | 0 0            | SOMGT:0:43 0/1:3 C  | T | 0 |
|       | ## | 0   |      |          |                     |                | SOMGT:0:24 0/1:3 C  | T | 0 |
|       |    |     |      |          |                     |                | SOMGT:0:8,(0/1:3 C  | T | 0 |
|       |    |     |      | 4.7      | 3.36                |                | SOMGT:0:41 0/1:3 A  | C | 0 |
|       |    |     |      |          |                     |                | SOMGT:0:39 0/1:3 G  | A | 0 |
|       |    |     |      |          |                     | 0              | SOMGT:0:9,(0/1:1 C  | T | 0 |
|       |    |     |      |          |                     |                | SOMGT:0:71 0/1:1 C  | T | 0 |
| ##### | ## | 0   | 0.0  | 0.9      | 1.0,D 1,D 5.9 5.76  |                | SOMGT:0:11 0/1:1 G  | A | 0 |
| ##### | 0  | 0   |      |          |                     |                | SOMGT:0:15 0/1:3 G  | A | 0 |
| ##### | ## | 0   |      |          |                     |                | SOMGT:0:21 0/1:3 C  | T | 0 |
|       |    | 0.5 | 0.0  | 0.004    | 0.99 5.9            |                | SOMGT:0:56 0/1:1 T  | C | 0 |
|       | ## | 0   | 0.0  | 0.9      | 1.0,D 1.00 5.4 5.22 |                | SOMGT:0:63 0/1:1 G  | A | 0 |

|       |    |     |     |       |       |      |      |      |                  |   |   |
|-------|----|-----|-----|-------|-------|------|------|------|------------------|---|---|
| ##### | 0  | 0.0 | 0.9 | 1.0,D | 1.00C | 3.8  | 3.80 |      | SOMGT:0:58 0/1:G | A | 0 |
| ##    | 0  |     |     |       |       |      |      |      | SOMGT:0:13 0/1:G | A | 0 |
|       |    |     |     |       |       |      |      |      | SOMGT:0:38 0/1:G | A | 0 |
|       |    |     |     |       |       |      |      |      | SOMGT:0:72 0/1:C | T | 0 |
|       |    |     |     |       |       |      |      |      | SOMGT:0:26 0/1:G | A | 0 |
| ##    | 0  | 0.0 | 0.9 | 1.0,D | 1.00C | 4.3  | 3.99 |      | SOMGT:0:33 0/1:G | A | 0 |
| ##    | 0  | 0.7 | 0.0 | 0.00E | 1.00C |      |      |      | SOMGT:0:82 0/1:C | T | 0 |
|       |    |     |     |       |       |      |      |      | SOMGT:0:9,(0/1:C | T | 0 |
|       |    |     |     |       |       |      |      |      | SOMGT:0:33 0/1:G | T | 0 |
|       |    |     |     |       |       | 0    | 0    |      | SOMGT:0:12 0/1:C | T | 0 |
|       |    |     |     |       |       | 2.8  | 1.66 |      | SOMGT:0:15 0/1:A | G | 0 |
| ##    | 0  | 0.1 | 0.0 | 0.0,B | 1,N   | 3    |      | 0    | SOMGT:0:77 0/1:C | A | 0 |
| 0     | 0  | 0.0 | 0.1 | 0.54E | 0.99E | 5.5  | 3.45 |      | SOMGT:0:82 0/1:C | T | 0 |
|       |    |     |     | 0.0   | 0.04E | 1,N  | 1.36 |      | SOMGT:0:30 0/1:C | T | 0 |
|       |    |     |     |       |       | 3.1  |      |      | SOMGT:0:28 0/1:T | C | 0 |
| ##### |    |     |     |       |       |      |      |      | SOMGT:0:30 0/1:G | A | 0 |
| ##    | 0  |     |     |       |       |      |      |      | SOMGT:0:86 0/1:G | A | 0 |
|       |    |     |     |       |       |      |      |      | SOMGT:0:13 0/1:A | G | 0 |
| ##    | 0  |     |     |       |       |      |      |      | SOMGT:0:17 0/1:G | A | 0 |
|       |    |     |     |       |       |      |      |      | SOMGT:0:9,(0/1:C | T | 0 |
|       |    |     |     |       |       |      |      |      | SOMGT:0:9,(0/1:T | A | 0 |
|       |    | 0.0 | 0.0 | 0.03E | 1,N   |      |      |      | SOMGT:0:18 0/1:C | A | 0 |
|       |    |     |     |       |       |      |      |      | SOMGT:0:38 0/1:C | A | 0 |
| 0     | 0  |     |     |       |       |      |      |      | SOMGT:0:14 0/1:G | A | 0 |
|       |    |     |     |       |       | 4.5  | 6.74 |      | SOMGT:0:40 0/1:C | T | 0 |
|       |    | 0.0 | 0.1 | 0.95E | 1,D   | 4.8  | 1.42 |      | SOMGT:0:36 0/1:G | A | 0 |
|       |    |     |     |       |       | 1,D  | 5.3  | 3.23 | SOMGT:0:44 0/1:T | C | 0 |
|       |    |     |     |       |       |      |      |      | SOMGT:0:33 0/1:G | T | 0 |
|       |    |     |     |       |       | 2.1  |      |      | SOMGT:0:37 0/1:G | T | 0 |
| ##    | 0  |     |     |       |       | 1.31 |      |      | SOMGT:0:15 0/1:G | A | 0 |
|       |    |     |     |       |       | 3.5  | 1.56 |      | SOMGT:0:67 0/1:A | T | 0 |
|       |    |     |     |       |       |      |      |      | SOMGT:0:15 0/1:T | C | 0 |
|       |    | 0.0 | 0.9 | 1.0,D | 1,D   | 5.4  | 3.88 |      | SOMGT:0:32 0/1:G | T | 0 |
|       |    |     |     |       |       | 2.1  |      |      | SOMGT:0:46 0/1:T | C | 0 |
| ##### | ## | 0   |     |       |       |      |      |      | SOMGT:0:53 0/1:C | T | 0 |
|       |    |     |     |       |       |      |      |      | SOMGT:0:26 0/1:A | G | 0 |
| ##    | 0  | 0.0 | 0.0 | 0.41E | 1,D   | 3.1  | 2.69 |      | SOMGT:0:59 0/1:C | T | 0 |
|       |    |     |     |       |       |      |      | 0    | SOMGT:0:15 0/1:C | T | 0 |
|       |    |     |     |       |       |      |      |      | SOMGT:0:16 0/1:A | G | 0 |
|       |    |     |     |       |       | 2.6  | 1.79 |      | SOMGT:0:10 0/1:C | T | 0 |
|       |    |     |     |       |       |      |      |      | SOMGT:0:21 0/1:C | T | 0 |
| ##    | 0  | 0.1 | 0.8 | 0.99E | 1,D   | 2.7  | 2.21 |      | SOMGT:0:18 0/1:C | T | 0 |
| ##### | ## | 0   |     |       |       | 1.98 |      |      | SOMGT:0:27 0/1:C | T | 0 |
|       |    | 0.5 | 0.5 | 0.97E | 0.91E | 4.9  | 3.01 |      | SOMGT:0:92 0/1:A | G | 0 |
|       |    |     |     |       |       | 2    |      |      | SOMGT:0:65 0/1:C | T | 0 |
|       |    |     |     |       |       |      |      |      | SOMGT:0:21 0/1:G | T | 0 |
| ##### | 0  | 0   |     |       |       |      |      |      | SOMGT:0:95 0/1:G | A | 0 |
|       |    |     |     |       |       |      |      |      | SOMGT:0:14 0/1:C | A | 0 |
|       |    |     |     |       |       |      |      |      | SOMGT:0:9,(0/1:G | T | 0 |
| ##    | 0  |     |     |       |       | 1,A  | 5.7  | 5.57 | SOMGT:0:49 0/1:G | A | 0 |
| 0     | 0  |     |     |       |       |      | 1.26 |      | SOMGT:0:34 0/1:G | A | 0 |
|       |    |     |     |       |       |      |      |      | SOMGT:0:38 0/1:G | A | 0 |
|       |    |     |     |       |       |      |      |      | SOMGT:0:98 0/1:G | A | 0 |
|       |    |     |     |       |       |      |      |      | SOMGT:0:15 0/1:C | T | 0 |

|       |          |                      |                |         |          |                  |   |   |
|-------|----------|----------------------|----------------|---------|----------|------------------|---|---|
|       |          |                      |                |         |          | SOMGT:0:12 0/1:G | A | 0 |
|       |          | 0.0(0.8(0.9840.999   | 4.3 3.06       |         |          | SOMGT:0:56 0/1:A | G | 0 |
|       |          | 0.2(0.9(0.999 1,D    | 5.4 3.15       |         |          | SOMGT:0:38 0/1:G | T | 0 |
|       |          |                      | 3.5            |         |          | SOMGT:0:21 0/1:C | T | 0 |
|       |          |                      | 4.2 2.86       |         |          | SOMGT:0:25 0/1:T | C | 0 |
|       |          |                      |                |         |          | SOMGT:0:20 0/1:G | A | 0 |
|       | ##       | 0                    |                |         |          | SOMGT:0:31 0/1:G | A | 0 |
|       |          |                      |                |         |          | SOMGT:0:15 0/1:C | T | 0 |
|       |          |                      |                |         |          | SOMGT:0:81 0/1:C | T | 0 |
|       |          | 0.2(0.0(0.02,1,D     |                |         |          | SOMGT:0:13 0/1:C | T | 0 |
|       |          | 0.3(                 | 1.000 3.7 1.88 |         |          | SOMGT:0:60 0/1:G | T | 0 |
|       |          |                      |                |         |          | SOMGT:0:12 0/1:C | T | 0 |
|       | ##       | 0                    |                | 0 0     |          | SOMGT:0:66 0/1:C | T | 0 |
|       |          |                      |                |         |          | SOMGT:0:20 0/1:G | T | 0 |
|       | ##       | 0                    |                |         |          | SOMGT:0:13 0/1:G | A | 0 |
|       |          |                      |                |         |          | SOMGT:0:31 0/1:C | A | 0 |
|       | ##       | 0 0.3 0.0(0.1040.999 | 2.3 1.34       |         |          | SOMGT:0:99 0/1:G | A | 0 |
|       | ##       | 0                    |                |         |          | SOMGT:0:84 0/1:C | T | 0 |
|       |          |                      |                |         |          | SOMGT:0:22 0/1:G | A | 0 |
|       |          |                      |                |         |          | SOMGT:0:38 0/1:C | T | 0 |
|       |          |                      |                | 0.1 0.2 |          | SOMGT:0:8(0/1:G  | A | 0 |
|       |          |                      |                |         |          | SOMGT:0:12 0/1:C | T | 0 |
|       |          |                      |                |         |          | SOMGT:0:24 0/1:A | G | 0 |
|       |          |                      |                |         |          | SOMGT:0:96 0/1:A | G | 0 |
|       |          |                      |                |         |          | SOMGT:0:28 0/1:C | T | 0 |
|       |          |                      |                |         |          | SOMGT:0:46 0/1:G | A | 0 |
|       |          |                      |                |         |          | SOMGT:0:40 0/1:G | A | 0 |
|       |          |                      |                | 0       |          | SOMGT:0:60 0/1:C | T | 0 |
|       | 0 0 0.1( |                      | 1,N            | 0       |          | SOMGT:0:78 0/1:G | A | 0 |
|       |          |                      |                |         |          | SOMGT:0:75 0/1:G | A | 0 |
|       |          |                      |                |         |          | SOMGT:0:11 0/1:G | A | 0 |
|       |          |                      |                |         |          | SOMGT:0:25 0/1:T | C | 0 |
|       |          |                      |                |         |          | SOMGT:0:13 0/1:A | G | 0 |
|       |          |                      |                |         |          | SOMGT:0:24 0/1:G | A | 0 |
| 2E-04 | ##       | 0                    |                | 0       |          | SOMGT:0:70 0/1:C | T | 0 |
|       |          | 0.0(0.9(0.967 1,D    | 4 4.18         |         |          | SOMGT:0:11 0/1:A | G | 0 |
|       | ##       | 0                    |                | 0       |          | SOMGT:0:55 0/1:C | T | 0 |
|       |          |                      |                |         |          | SOMGT:0:24 0/1:G | T | 0 |
|       |          | 0.1(                 |                | 0       |          | SOMGT:0:14 0/1:G | A | 0 |
|       |          |                      | 1,N            | 0       |          | SOMGT:0:40 0/1:C | T | 0 |
|       |          |                      |                | 0.2 0.3 |          | SOMGT:0:10 0/1:A | G | 0 |
|       |          |                      |                |         |          | SOMGT:0:45 0/1:T | C | 0 |
|       |          |                      |                |         |          | SOMGT:0:16 0/1:C | T | 0 |
|       |          |                      |                |         |          | SOMGT:0:19 0/1:A | T | 0 |
|       |          |                      |                |         |          | SOMGT:0:29 0/1:C | T | 0 |
|       |          |                      |                | 2.3     |          | SOMGT:0:11 0/1:G | A | 0 |
|       |          | 0.1(0.9(1.0,D 1.000  | 4.5 2.61       |         |          | SOMGT:0:76 0/1:G | A | 0 |
|       |          |                      | 2.07           |         |          | SOMGT:0:39 0/1:G | T | 0 |
| 6E-04 | 0 0      |                      |                |         |          | SOMGT:0:86 0/1:C | T | 0 |
|       |          |                      |                |         |          | SOMGT:0:87 0/1:G | A | 0 |
|       | ##       | 0                    |                |         |          | SOMGT:0:60 0/1:G | A | 0 |
|       | ##       | 0                    |                | 1,A     | 3.8 5.48 | SOMGT:0:55 0/1:C | T | 0 |
|       | ##       | 0                    |                | 1,D     | 4.3 7.65 | SOMGT:0:12 0/1:C | T | 0 |
|       |          |                      |                |         |          | SOMGT:0:30 0/1:G | A | 0 |



|       |    |     |     |           |             |      |      |      |                     |   |   |
|-------|----|-----|-----|-----------|-------------|------|------|------|---------------------|---|---|
|       |    |     |     |           |             |      |      |      | SOMGT:0:16 0/1:G    | A | 0 |
|       |    |     |     |           |             |      |      |      | SOMGT:0:48 0/1:G    | A | 0 |
|       |    | 0.0 | 0.9 | 1.0,D 1,D | 4.4         | 3.92 |      |      | SOMGT:0:10 0/1:G    | T | 0 |
|       |    |     |     |           |             |      |      |      | SOMGT:0:16 0/1:A    | G | 0 |
|       | ## | 0   | 0.0 | 0.4       | 0.96        | 0.96 | 5.8  | 4.26 | DB;SOMGT:0:60 0/1:G | A | 0 |
| 2E-04 | 0  | 0   | 0.0 | 0.9       | 1.0,D 1,D   |      | 5.7  | 5.61 | SOMGT:0:10 0/1:C    | T | 0 |
|       |    |     |     |           |             |      |      |      | SOMGT:0:39 0/1:G    | T | 0 |
|       |    |     |     |           |             |      |      |      | SOMGT:0:15 0/1:A    | G | 0 |
|       |    |     |     |           |             |      |      |      | SOMGT:0:42 0/1:G    | T | 0 |
|       |    |     |     |           | 1,D         | 6    | 3.25 |      | SOMGT:0:27 0/1:A    | G | 0 |
|       | ## | 0   |     |           |             |      |      |      | SOMGT:0:64 0/1:G    | A | 0 |
|       |    |     |     |           |             |      |      |      | SOMGT:0:17 0/1:G    | T | 0 |
|       |    | 0.0 | 0.9 | 1.0,D 1,D | 5.5         | 3.28 |      |      | SOMGT:0:67 0/1:T    | C | 0 |
|       | ## | 0   | 0.0 | 0.9       | 1.0,D 1,D   |      | 5.6  | 5.38 | SOMGT:0:42 0/1:G    | A | 0 |
|       | ## | 0   | 0.0 | 0.9       | 1.0,D 0.987 | 2.8  | 3.48 | 0 0  | SOMGT:0:42 0/1:C    | T | 0 |
|       |    |     | 0.1 | 0.0       | 0.0011,N    | 2.8  |      |      | SOMGT:0:32 0/1:C    | G | 0 |
|       | ## | 0   |     |           |             | 3.7  |      |      | SOMGT:0:71 0/1:C    | T | 0 |
|       |    |     |     |           |             |      |      |      | SOMGT:0:15 0/1:G    | A | 0 |
|       |    |     |     |           |             |      |      |      | SOMGT:0:27 0/1:T    | C | 0 |
|       |    |     |     |           |             | 3.3  | 3.65 |      | SOMGT:0:54 0/1:T    | C | 0 |
|       | ## | 0   |     |           |             |      |      |      | SOMGT:0:32 0/1:C    | T | 0 |
|       |    |     |     |           |             |      |      |      | SOMGT:0:61 0/1:C    | T | 0 |
|       |    |     |     |           |             |      |      | 0 0  | SOMGT:0:23 0/1:C    | T | 0 |
|       |    |     |     |           |             |      |      |      | SOMGT:0:34 0/1:C    | A | 0 |
|       |    | 0.1 | 0.9 | 1.0,D 1,D | 6           | 4.74 |      |      | SOMGT:0:55 0/1:G    | A | 0 |
|       |    |     |     |           |             |      |      |      | SOMGT:0:76 0/1:C    | A | 0 |
|       |    |     |     |           |             |      |      |      | SOMGT:0:8,0/1:G     | A | 0 |
|       |    |     |     |           |             |      |      | 0    | SOMGT:0:69 0/1:C    | T | 0 |
|       |    |     |     |           |             |      |      | 0    | SOMGT:0:64 0/1:C    | T | 0 |
|       |    |     |     |           |             |      |      |      | SOMGT:0:14 0/1:G    | A | 0 |
|       |    |     |     |           |             |      |      |      | SOMGT:0:12 0/1:C    | T | 0 |
|       |    |     |     |           |             |      |      | 0 0  | SOMGT:0:46 0/1:A    | G | 0 |
|       |    |     |     |           |             |      |      |      | SOMGT:0:41 0/1:G    | T | 0 |
|       |    |     |     |           |             | 2.5  | 1.34 |      | SOMGT:0:35 0/1:C    | T | 0 |
| 2E-04 | ## | 0   |     |           |             |      |      |      | SOMGT:0:10 0/1:C    | T | 0 |
|       |    |     |     |           |             |      |      |      | SOMGT:0:15 0/1:G    | A | 0 |
|       | ## | 0   |     |           |             |      |      | 0    | SOMGT:0:58 0/1:G    | A | 0 |
|       |    |     |     |           |             |      |      |      | SOMGT:0:14 0/1:T    | C | 0 |
|       |    |     |     |           |             |      |      |      | SOMGT:0:9,0/1:C     | T | 0 |
|       |    | 0   | 1.0 |           | 1,N         |      |      |      | SOMGT:0:29 0/1:A    | G | 0 |
|       |    |     |     |           |             |      |      |      | SOMGT:0:23 0/1:G    | A | 0 |
| ##### | ## | 0   | 0.0 | 0.4       | 0.9011,000  | 5.4  | 3.98 | 0    | SOMGT:0:14 0/1:C    | T | 0 |
|       |    |     | 0.0 | 0.7       | 0.99        | 1,D  | 5.1  | 4.69 | SOMGT:0:86 0/1:G    | A | 0 |
|       |    |     |     |           |             |      |      |      | SOMGT:0:27 0/1:A    | T | 0 |
|       | ## |     |     |           |             |      |      | 0    | SOMGT:0:10 0/1:G    | A | 0 |
|       |    |     |     |           |             | 1.71 |      |      | SOMGT:0:46 0/1:C    | T | 0 |
| 2E-04 | ## | 0   |     |           |             |      |      |      | SOMGT:0:10 0/1:C    | T | 0 |
|       |    |     |     |           |             |      |      | 0    | SOMGT:0:18 0/1:T    | C | 0 |
|       |    |     |     |           |             |      |      |      | SOMGT:0:80 0/1:T    | C | 0 |
|       |    |     |     |           |             |      |      |      | SOMGT:0:35 0/1:C    | T | 0 |
|       |    |     |     |           |             |      |      |      | SOMGT:0:45 0/1:G    | T | 0 |
|       | ## | 0   | 0.0 | 0.9       | 1.0,D 1,000 | 5.7  | 3.91 |      | SOMGT:0:40 0/1:G    | A | 0 |
|       |    |     |     |           |             | 3.4  |      |      | SOMGT:0:23 0/1:C    | A | 0 |
|       |    |     |     |           |             |      |      |      | SOMGT:0:59 0/1:G    | A | 0 |

|   |       |    |     |            |       |         |          |                    |                    |                  |   |   |
|---|-------|----|-----|------------|-------|---------|----------|--------------------|--------------------|------------------|---|---|
| . | .     | .  | .   | .          | .     | .       | .        | SOMGT:0:73 0/1:G   | A                  | 0                |   |   |
| . | .     | .  | .   | .          | .     | .       | .        | SOMGT:0:17 0/1:C   | T                  | 0                |   |   |
| . | .     | .  | .   | .          | .     | .       | .        | SOMGT:0:29 0/1:A   | G                  | 0                |   |   |
| . | ##    | 0  | 0.0 | 0.0010.771 | 3.5   | .       | .        | SOMGT:0:68 0/1:G   | A                  | 0                |   |   |
| . | .     | .  | 0.1 | 0.1        | 0.302 | 1,N     | .        | SOMGT:0:11 0/1:G   | T                  | 0                |   |   |
| . | .     | .  | .   | .          | .     | .       | .        | SOMGT:0:12 0/1:G   | A                  | 0                |   |   |
| . | .     | .  | .   | .          | .     | .       | .        | SOMGT:0:9,(0/1:G   | C                  | 0                |   |   |
| . | ##    | 0  | 0.0 | 0.0        | 0.491 | 1.00C   | .        | SOMGT:0:79 0/1:C   | T                  | 0                |   |   |
| . | 0     | 0  | .   | .          | .     | .       | 0        | DB;S GT:0:66 0/1:C | T                  | 0                |   |   |
| . | ##    | 0  | 0.2 | 0.0        | 0.00E | 1,N     | 1.60     | SOMGT:0:46 0/1:G   | A                  | 0                |   |   |
| . | ##### | ## | 0   | 0.0        | 0.8   | 0.99E   | 1,D      | 4.2 3.34           | SOMGT:0:17 0/1:C   | T                | 0 |   |
| . | ##### | ## | 0   | .          | .     | .       | .        | 0                  | SOMGT:0:25 0/1:C   | T                | 0 |   |
| . | .     | .  | .   | .          | .     | .       | 3        | SOMGT:0:31 0/1:G   | T                  | 0                |   |   |
| . | .     | .  | .   | .          | .     | .       | .        | SOMGT:0:8,(0/1:C   | A                  | 0                |   |   |
| . | ##### | .  | .   | .          | .     | .       | .        | SOMGT:0:97 0/1:C   | T                  | 0                |   |   |
| . | .     | .  | .   | .          | .     | .       | .        | SOMGT:0:28 0/1:G   | A                  | 0                |   |   |
| . | .     | .  | 0.0 | 0.6        | 0.95E | 1,N     | 2.8 2.07 | SOMGT:0:44 0/1:A   | T                  | 0                |   |   |
| . | .     | .  | .   | .          | .     | .       | .        | SOMGT:0:11 0/1:C   | T                  | 0                |   |   |
| . | .     | .  | 0.3 | 0.4        | 0.83E | 0.982   | 2.6 1.55 | SOMGT:0:65 0/1:G   | A                  | 0                |   |   |
| . | ##    | 0  | .   | .          | .     | .       | .        | SOMGT:0:43 0/1:C   | T                  | 0                |   |   |
| . | .     | .  | 0.0 | 0.9        | 1.0   | D 1,D   | 5.2 5.25 | SOMGT:0:12 0/1:G   | A                  | 0                |   |   |
| . | .     | .  | .   | .          | .     | .       | 0        | SOMGT:0:83 0/1:G   | A                  | 0                |   |   |
| . | 0     | 0  | 0.0 | 0.9        | 1.0   | D 1,D   | 4.8 4.71 | SOMGT:0:69 0/1:C   | T                  | 0                |   |   |
| . | .     | .  | .   | .          | .     | .       | 0        | SOMGT:0:22 0/1:C   | T                  | 0                |   |   |
| . | ##### | ## | 0   | 0.0        | 0.9   | 1.0     | D 1.00C  | 3.51               | SOMGT:0:20 0/1:C   | T                | 0 |   |
| . | .     | .  | .   | .          | .     | .       | 1.74     | SOMGT:0:99 0/1:T   | A                  | 0                |   |   |
| . | ##### | ## | 0   | .          | .     | .       | .        | 0                  | SOMGT:0:45 0/1:G   | A                | 0 |   |
| . | .     | .  | .   | .          | .     | .       | .        | SOMGT:0:30 0/1:C   | A                  | 0                |   |   |
| . | ##    | 0  | 0.4 | 0.0        | 0.001 | 1,N     | .        | 0                  | SOMGT:0:10 0/1:G   | A                | 0 |   |
| . | .     | .  | .   | .          | .     | .       | .        | SOMGT:0:43 0/1:G   | A                  | 0                |   |   |
| . | .     | .  | .   | .          | .     | .       | .        | SOMGT:0:32 0/1:T   | C                  | 0                |   |   |
| . | .     | .  | .   | .          | .     | .       | .        | SOMGT:0:66 0/1:G   | A                  | 0                |   |   |
| . | .     | .  | .   | .          | .     | .       | 0        | 0                  | SOMGT:0:30 0/1:C   | T                | 0 |   |
| . | .     | .  | .   | .          | .     | .       | .        | SOMGT:0:48 0/1:A   | G                  | 0                |   |   |
| . | ##    | 0  | .   | .          | .     | .       | .        | SOMGT:0:36 0/1:C   | T                  | 0                |   |   |
| . | 0     | 0  | 0.3 | 0.0        | 0.0   | B 1,N   | .        | 0                  | 0                  | SOMGT:0:52 0/1:G | A | 0 |
| . | .     | .  | 0.0 | 0.8        | 0.99E | 1.00C   | 5.7 3.29 | SOMGT:0:61 0/1:C   | A                  | 0                |   |   |
| . | .     | .  | .   | .          | .     | .       | .        | SOMGT:0:14 0/1:T   | A                  | 0                |   |   |
| . | .     | .  | .   | .          | .     | .       | .        | SOMGT:0:28 0/1:G   | A                  | 0                |   |   |
| . | ##### | ## | 0   | .          | .     | .       | .        | SOMGT:0:22 0/1:C   | T                  | 0                |   |   |
| . | 2E-04 | 0  | 0   | 0.0        | 0.0   | 0.00E   | 1,N      | .                  | 0                  | SOMGT:0:90 0/1:C | T | 0 |
| . | .     | .  | 0.0 | 0.9        | 0.99E | 0.964   | 4.8 2.03 | SOMGT:0:10 0/1:G   | T                  | 0                |   |   |
| . | ##    | 0  | 0.2 | 0.0        | 0.0   | B 1,N   | .        | 0                  | SOMGT:0:12 0/1:G   | A                | 0 |   |
| . | .     | .  | .   | .          | .     | .       | .        | SOMGT:0:37 0/1:T   | C                  | 0                |   |   |
| . | .     | .  | .   | .          | .     | .       | .        | SOMGT:0:28 0/1:G   | A                  | 0                |   |   |
| . | ##    | 0  | .   | .          | .     | .       | 2.57     | SOMGT:0:27 0/1:A   | G                  | 0                |   |   |
| . | .     | .  | .   | .          | .     | .       | 2.86     | SOMGT:0:31 0/1:G   | A                  | 0                |   |   |
| . | 0     | 0  | .   | .          | .     | .       | .        | SOMGT:0:81 0/1:G   | A                  | 0                |   |   |
| . | .     | .  | .   | .          | .     | .       | 5.6 2.61 | SOMGT:0:14 0/1:C   | T                  | 0                |   |   |
| . | .     | .  | .   | .          | .     | .       | .        | SOMGT:0:16 0/1:C   | T                  | 0                |   |   |
| . | .     | .  | .   | .          | .     | .       | .        | SOMGT:0:22 0/1:G   | A                  | 0                |   |   |
| . | .     | .  | .   | .          | .     | .       | 2.1      | SOMGT:0:10 0/1:T   | C                  | 0                |   |   |
| . | 0     | 0  | 0.0 | 0.0        | 0.0   | B 1.00C | 4.2 2.45 | 0                  | DB;S GT:0:91 0/1:A | T                | 0 |   |
| . | 0     | 0  | 0.6 | 0.0        | 0.004 | 1,N     | 2.2      | 0                  | SOMGT:0:18 0/1:G   | A                | 0 |   |

|           |    |                               |                               |                      |   |   |
|-----------|----|-------------------------------|-------------------------------|----------------------|---|---|
| . . . . . | ## | 0                             | . . . . .                     | SOMGT:0:72 0/1:G     | A | 0 |
| . . . . . |    |                               | 0.9!1.0,D 1.00C 3.2 2.86.     | SOMGT:0:50 0/1:C     | A | 0 |
| #####     | ## |                               | . . . . .                     | SOMGT:0:82 0/1:C     | T | 0 |
| . . . . . |    |                               | 0.0!0.9!1.0,D 1,D 5.7 4.84.   | SOMGT:0:60 0/1:G     | A | 0 |
| . . . . . |    |                               | 0.3!0.7!0.99E 0.99E 4.6 2.75. | SOMGT:0:77 0/1:C     | T | 0 |
| . . . . . |    |                               | . . . . .                     | SOMGT:0:22 0/1:C     | T | 0 |
| . . . . . |    |                               | . . . . .                     | SOMGT:0:19 0/1:G     | T | 0 |
| . . . . . |    |                               | 0.0,0.9!1.0,D 0.731 3.6 4.00. | SOMGT:0:55 0/1:G     | A | 0 |
| . . . . . |    |                               | . . . . .                     | SOMGT:0:55 0/1:C     | T | 0 |
| #####     | ## | 0                             | 0.0!0.9!1.0,D 1.00C 5.2 3.22. | SOMGT:0:11 0/1:G     | A | 0 |
| . . . . . |    |                               | . . . . .                     | 0 0 SOMGT:0:25 0/1:A | T | 0 |
| . . . . . |    |                               | 0.4! . . . . . 1,N . . . . .  | SOMGT:0:27 0/1:G     | A | 0 |
| . . . . . |    |                               | 0.0,0.9!1.0,D 1,D 5.8 3.66.   | SOMGT:0:11 0/1:C     | T | 0 |
| . . . . . |    |                               | . . . . . 1.23.               | SOMGT:0:52 0/1:T     | C | 0 |
| ##        | 0  | 0.0!0.9!1.0,D 0.99E 3.4 4.90. |                               | SOMGT:0:13 0/1:G     | A | 0 |
| . . . . . |    |                               | . . . . .                     | SOMGT:0:68 0/1:G     | T | 0 |
| . . . . . |    |                               | . . . . .                     | SOMGT:0:8,(0/1:G     | T | 0 |
| ##        | 0  | 0.2!0.4!0.99, 0.89E 4.5 .     | 0 0                           | SOMGT:0:13 0/1:C     | T | 0 |
| . . . . . |    |                               | . . . . .                     | SOMGT:0:37 0/1:G     | A | 0 |
| . . . . . |    |                               | 3.4 2.32.                     | SOMGT:0:67 0/1:T     | C | 0 |
| . . . . . |    |                               | . . . . .                     | SOMGT:0:43 0/1:G     | T | 0 |
| . . . . . |    |                               | . . . . .                     | SOMGT:0:10 0/1:C     | A | 0 |
| . . . . . |    |                               | 0 0                           | DB;SOMGT:0:48 0/1:C  | T | 0 |
| . . . . . |    |                               | 0 .                           | SOMGT:0:24 0/1:A     | G | 0 |
| . . . . . |    |                               | 2.7 .                         | SOMGT:0:23 0/1:A     | G | 0 |
| . . . . . |    |                               | 0 .                           | SOMGT:0:49 0/1:A     | G | 0 |
| . . . . . |    |                               | 0 0.1                         | SOMGT:0:8,(0/1:G     | C | 0 |
| . . . . . |    |                               | . . . . .                     | SOMGT:0:9,(0/1:C     | A | 0 |
| . . . . . |    |                               | . . . . .                     | SOMGT:0:21 0/1:A     | C | 0 |
| . . . . . |    |                               | . . . . .                     | SOMGT:0:9,(0/1:C     | G | 0 |
| . . . . . |    |                               | 0 .                           | DB;SOMGT:0:19 0/1:A  | C | 0 |
| . . . . . |    |                               | 0 .                           | DB;SOMGT:0:19 0/1:C  | T | 0 |
| . . . . . |    |                               | 0 .                           | DB;SOMGT:0:22 0/1:T  | G | 0 |
| . . . . . |    |                               | . . . . .                     | DB;SOMGT:0:19 0/1:C  | T | 0 |
| . . . . . |    |                               | 0 .                           | DB;SOMGT:0:28 0/1:G  | C | 0 |
| . . . . . |    |                               | 0 .                           | DB;SOMGT:0:39 0/1:G  | C | 0 |
| . . . . . |    |                               | . . . . .                     | SOMGT:0:23 0/1:A     | G | 0 |
| . . . . . |    |                               | 0 .                           | SOMGT:0:30 0/1:A     | C | 0 |
| . . . . . |    |                               | 0 0                           | DB;SOMGT:0:24 0/1:A  | G | 0 |
| . . . . . |    |                               | . . . . .                     | DB;SOMGT:0:29 0/1:A  | G | 0 |
| . . . . . |    |                               | 0 .                           | DB;SOMGT:0:34 0/1:T  | G | 0 |
| . . . . . |    |                               | . . . . .                     | DB;SOMGT:0:35 0/1:A  | G | 0 |
| . . . . . |    |                               | 0 .                           | DB;SOMGT:0:34 0/1:G  | C | 0 |
| . . . . . |    |                               | 0 .                           | DB;SOMGT:0:37 0/1:T  | A | 0 |
| . . . . . |    |                               | 0 .                           | DB;SOMGT:0:23 0/1:A  | T | 0 |
| . . . . . |    |                               | 0 .                           | DB;SOMGT:0:27 0/1:T  | G | 0 |
| . . . . . |    |                               | 0 .                           | SOMGT:0:10 0/1:G     | T | 0 |
| . . . . . |    |                               | 0 .                           | SOMGT:0:13 0/1:G     | A | 0 |
| . . . . . |    |                               | . . . . .                     | SOMGT:0:10 0/1:T     | C | 0 |
| . . . . . |    |                               | . . . . .                     | SOMGT:0:10 0/1:T     | C | 0 |
| 2E-04     | ## | 0                             | . . . . .                     | SOMGT:0:15 0/1:G     | A | 0 |
| . . . . . |    |                               | . . . . .                     | SOMGT:0:24 0/1:C     | A | 0 |
| . . . . . |    |                               | . . . . .                     | SOMGT:0:49 0/1:C     | A | 0 |
| . . . . . |    |                               | 0.1!0.0!0.002 1.00C . 1.43.   | SOMGT:0:50 0/1:G     | T | 0 |

|       |    |     |     |       |       |       |      |                    |                    |   |   |
|-------|----|-----|-----|-------|-------|-------|------|--------------------|--------------------|---|---|
|       |    |     |     |       |       |       |      | SOMGT:0:25 0/1:z A | C                  | 0 |   |
|       |    |     |     |       |       |       |      | SOMGT:0:47 0/1:z G | A                  | 0 |   |
| 8E-04 | 0  |     |     |       |       |       |      | SOMGT:0:20 0/1:z C | T                  | 0 |   |
|       |    |     |     |       |       |       |      | SOMGT:0:53 0/1:z T | C                  | 0 |   |
|       |    | 0.0 | 0.7 | 0.98  | 0.671 | 3.1   | 3.79 | SOMGT:0:61 0/1:z G | T                  | 0 |   |
|       |    |     |     |       |       |       | 1.73 | SOMGT:0:17 0/1:z A | G                  | 0 |   |
|       |    |     |     |       |       |       | 0    | SOMGT:0:8,0/1:z A  | G                  | 0 |   |
|       |    | 0.1 | 0.8 | 0.99  | 1,N   |       | 1.95 | SOMGT:0:93 0/1:z C | T                  | 0 |   |
|       |    |     |     |       |       |       |      | SOMGT:0:30 0/1:z A | G                  | 0 |   |
|       | ## | 0   |     |       |       |       |      | SOMGT:0:13 0/1:z C | T                  | 0 |   |
|       | ## | 0   | 0.0 | 0.9   | 1.0,D | 1.00  | 5.3  | 3.77               | SOMGT:0:89 0/1:z G | A | 0 |
|       |    |     |     |       |       |       | 2.2  | 1.30               | SOMGT:0:60 0/1:z G | T | 0 |
|       | ## | 0   | 0.0 | 0.8   | 0.99  | 1.00  |      | 3.55               | SOMGT:0:48 0/1:z C | T | 0 |
| 2E-04 | ## | 0   |     |       |       |       |      | 0                  | SOMGT:0:32 0/1:z G | A | 0 |
|       |    |     |     |       |       |       |      |                    | SOMGT:0:19 0/1:z C | A | 0 |
|       | ## | 0   | 0.0 | 0.124 | 0.982 |       | 1.80 |                    | SOMGT:0:65 0/1:z C | T | 0 |
|       |    |     |     |       |       |       |      |                    | SOMGT:0:41 0/1:z C | A | 0 |
|       |    |     |     |       |       |       |      |                    | SOMGT:0:10 0/1:z G | A | 0 |
|       |    | 0.5 | 0.8 | 0.931 | 0.991 | 5.5   | 3.13 |                    | SOMGT:0:31 0/1:z C | T | 0 |
|       |    |     |     |       |       |       |      | 0                  | SOMGT:0:38 0/1:z A | G | 0 |
|       |    |     |     |       |       |       |      |                    | SOMGT:0:25 0/1:z C | T | 0 |
|       |    |     |     |       |       |       |      |                    | SOMGT:0:38 0/1:z C | T | 0 |
| 2E-04 | ## | 0   | 0.7 | 0.99  |       |       | 4.1  |                    | SOMGT:0:25 0/1:z G | A | 0 |
|       | 0  | 0   |     |       |       |       |      | 0                  | SOMGT:0:10 0/1:z G | T | 0 |
|       |    |     |     |       |       |       |      |                    | SOMGT:0:46 0/1:z C | T | 0 |
|       |    |     |     |       |       |       |      |                    | SOMGT:0:38 0/1:z C | T | 0 |
|       |    |     |     |       |       |       |      | 0                  | SOMGT:0:10 0/1:z A | G | 0 |
|       | 0  | 0   | 0.0 | 0.205 |       |       |      | 0                  | SOMGT:0:38 0/1:z G | A | 0 |
|       |    |     |     |       |       |       |      |                    | SOMGT:0:14 0/1:z T | C | 0 |
|       |    |     |     |       |       |       |      | 0.1                | SOMGT:0:34 0/1:z C | T | 0 |
| 2E-04 | ## | 0   | 0.0 | 0.8   | 0.984 | 0.98  | 5.1  | 2.66               | SOMGT:0:38 0/1:z G | A | 0 |
|       | ## | 0   | 0.0 | 0.7   | 0.99  | 1.00  | 4    | 2.25               | SOMGT:0:64 0/1:z G | A | 0 |
|       |    |     | 0.0 | 0.8   | 0.997 | 1.00  |      | 2.53               | SOMGT:0:24 0/1:z C | T | 0 |
|       |    |     | 0.0 | 1.0   | 1.0,D | 1,D   | 4.7  | 4.17               | SOMGT:0:14 0/1:z T | A | 0 |
| ##### | ## | 0   |     |       |       |       |      | 0                  | SOMGT:0:11 0/1:z C | T | 0 |
|       |    |     |     |       |       |       |      |                    | SOMGT:0:58 0/1:z T | C | 0 |
|       | ## | 0   | 0.1 | 0.0   | 0.025 | 1,N   |      |                    | SOMGT:0:11 0/1:z G | A | 0 |
|       |    |     |     |       |       |       |      |                    | SOMGT:0:20 0/1:z C | T | 0 |
|       |    |     | 0.0 | 0.9   | 1.0,D | 1,D   | 4.7  | 4.08               | SOMGT:0:13 0/1:z C | T | 0 |
|       |    |     |     |       |       |       |      |                    | SOMGT:0:70 0/1:z C | A | 0 |
|       | ## | 0   |     |       |       |       |      |                    | SOMGT:0:62 0/1:z G | A | 0 |
|       | ## | 0   |     |       |       |       |      |                    | SOMGT:0:11 0/1:z G | A | 0 |
|       | ## | 0   | 0.0 | 0.9   | 0.994 | 1.00  | 4.9  | 4.09               | SOMGT:0:81 0/1:z T | C | 0 |
|       |    |     | 0.6 | 0.0   | 0.001 | 1,D   | 5.6  | 3.09               | SOMGT:0:73 0/1:z C | T | 0 |
|       |    |     |     |       |       |       | 2.2  |                    | SOMGT:0:10 0/1:z A | G | 0 |
|       |    |     |     |       |       |       |      |                    | SOMGT:0:63 0/1:z T | C | 0 |
|       |    |     |     |       |       |       |      |                    | SOMGT:0:13 0/1:z C | A | 0 |
|       |    |     | 0.2 | 0.0   | 0.142 | 0.90  | 5.5  |                    | SOMGT:0:82 0/1:z G | T | 0 |
|       | ## | 0   | 0.0 | 0.0   | 0.492 | 0.972 | 3.9  | 4.11               | SOMGT:0:40 0/1:z C | T | 0 |
|       |    |     |     |       |       |       |      |                    | SOMGT:0:80 0/1:z A | G | 0 |
|       |    |     |     |       |       |       | 3.4  | 2.72               | SOMGT:0:62 0/1:z T | C | 0 |
|       |    |     |     |       |       |       | 3.4  |                    | SOMGT:0:11 0/1:z A | C | 0 |
|       | ## | 0   |     |       |       |       | 3.2  |                    | SOMGT:0:32 0/1:z C | T | 0 |
| ##### | 0  | 0   |     |       |       |       |      |                    | SOMGT:0:58 0/1:z C | T | 0 |

|       |    |     |     |       |      |        |      |      |                   |                   |   |   |
|-------|----|-----|-----|-------|------|--------|------|------|-------------------|-------------------|---|---|
| 0     | 0  |     |     |       |      |        |      |      | SOMGT:0:65 0/1:G  | A                 | 0 |   |
| 0     | 0  | 0.5 | 0.0 | 0.002 | 1,N  |        |      |      | SOMGT:0:15 0/1:C  | T                 | 0 |   |
|       |    |     |     |       |      |        |      |      | SOMGT:0:8,0/1:C   | T                 | 0 |   |
|       |    | 0.1 | 0.0 | 0.01  | 0.98 |        |      |      | SOMGT:0:26 0/1:T  | C                 | 0 |   |
|       |    |     |     |       |      |        |      | 0    | SOMGT:0:61 0/1:C  | T                 | 0 |   |
|       |    |     |     |       |      |        |      |      | SOMGT:0:15 0/1:A  | G                 | 0 |   |
| 0.002 | 0  | 0   | 0.3 | 0.3   | 0.92 | 10.997 | 5.4  | 3.35 | SOMGT:0:74 0/1:G  | A                 | 0 |   |
|       | ## | 0   | 1.0 | 1.0   | D    | 1,D    | 5.6  | 5.52 | SOMGT:0:68 0/1:G  | A                 | 0 |   |
| 3E-04 | 0  | 0   |     |       |      |        |      |      | SOMGT:0:10 0/1:G  | A                 | 0 |   |
|       |    |     |     |       |      |        |      |      | SOMGT:0:89 0/1:C  | T                 | 0 |   |
|       |    |     |     |       |      |        | 1.68 |      | SOMGT:0:64 0/1:C  | T                 | 0 |   |
|       | ## | 0   |     |       |      |        | 2.87 |      | SOMGT:0:14 0/1:A  | G                 | 0 |   |
|       |    |     |     |       | 1,A  | 4.1    | 19.1 |      | SOMGT:0:48 0/1:G  | T                 | 0 |   |
|       |    |     |     |       |      | 3.5    |      |      | SOMGT:0:90 0/1:C  | T                 | 0 |   |
|       | ## | 0   |     |       |      |        |      |      | SOMGT:0:74 0/1:C  | T                 | 0 |   |
|       | 0  | 0   |     |       |      |        |      |      | SOMGT:0:19 0/1:G  | A                 | 0 |   |
|       |    |     |     |       |      | 3.2    |      |      | SOMGT:0:33 0/1:G  | A                 | 0 |   |
|       |    |     |     |       |      |        |      |      | SOMGT:0:32 0/1:T  | C                 | 0 |   |
|       |    |     |     |       |      |        |      |      | SOMGT:0:68 0/1:C  | T                 | 0 |   |
|       |    |     |     |       |      |        |      |      | SOMGT:0:31 0/1:G  | A                 | 0 |   |
|       |    |     |     |       |      |        |      |      | DB:SGT:0:67 0/1:G | A                 | 0 |   |
|       |    |     |     |       |      |        |      |      | SOMGT:0:84 0/1:A  | G                 | 0 |   |
|       |    |     |     |       |      |        |      |      | SOMGT:0:19 0/1:G  | A                 | 0 |   |
|       |    |     |     |       |      |        |      |      | SOMGT:0:16 0/1:C  | A                 | 0 |   |
|       | 1  | 0   |     |       |      | 2.3    | 1.54 | 0.1  | 0.2               | DB:SGT:0:58 0/1:T | C | 0 |
|       | ## | 0   |     |       |      |        |      |      | SOMGT:0:50 0/1:G  | A                 | 0 |   |
|       |    |     |     |       |      |        |      |      | SOMGT:0:16 0/1:G  | A                 | 0 |   |
|       |    |     |     |       |      |        |      |      | SOMGT:0:16 0/1:C  | T                 | 0 |   |
|       |    |     |     |       |      |        |      | 0    | SOMGT:0:17 0/1:A  | T                 | 0 |   |
|       |    |     |     |       | 1,N  |        |      |      | SOMGT:0:66 0/1:G  | T                 | 0 |   |
|       |    |     |     |       |      |        |      |      | SOMGT:0:86 0/1:C  | T                 | 0 |   |
|       |    |     |     |       |      |        |      |      | SOMGT:0:26 0/1:C  | T                 | 0 |   |
|       |    |     |     |       |      |        |      | 0    | SOMGT:0:59 0/1:C  | T                 | 0 |   |
|       |    |     |     |       |      |        |      |      | SOMGT:0:69 0/1:A  | G                 | 0 |   |
|       |    | 0.0 | 0.1 | 0.22  | 0.94 | 2.9    | 2.39 |      | SOMGT:0:96 0/1:C  | T                 | 0 |   |
|       |    | 0.0 | 0.9 | 0.99  | 1.00 | 4.9    | 5.48 |      | SOMGT:0:48 0/1:C  | T                 | 0 |   |
|       |    |     |     |       |      |        |      | 0    | 0                 | SOMGT:0:12 0/1:A  | G | 0 |
|       | ## | 0   | 1.0 | 0.0   | 0.0  | B      | 1,N  |      | SOMGT:0:67 0/1:C  | T                 | 0 |   |
|       |    |     |     |       |      |        |      |      | SOMGT:0:53 0/1:G  | T                 | 0 |   |
|       |    |     |     |       |      | 2.5    | 2.71 |      | SOMGT:0:14 0/1:A  | G                 | 0 |   |
|       |    |     |     |       |      |        |      |      | SOMGT:0:16 0/1:G  | T                 | 0 |   |
|       |    |     |     |       |      |        |      |      | SOMGT:0:58 0/1:G  | T                 | 0 |   |
|       |    | 0.5 | 0.5 | 0.627 | 1.00 | 4.1    | 2.37 |      | SOMGT:0:63 0/1:G  | A                 | 0 |   |
|       | ## | 0   | 0.5 | 0.0   | 0.24 | 1,N    |      |      | SOMGT:0:99 0/1:C  | T                 | 0 |   |
|       |    |     |     |       |      |        |      |      | SOMGT:0:16 0/1:G  | T                 | 0 |   |
|       |    |     |     |       |      |        |      |      | SOMGT:0:19 0/1:C  | A                 | 0 |   |
|       |    |     |     |       |      |        |      | 0.1  | 0.2               | SOMGT:0:42 0/1:T  | G | 0 |
|       |    |     |     |       |      |        |      | 0    | 0                 | SOMGT:0:12 0/1:T  | C | 0 |
|       |    |     |     |       |      |        |      |      |                   | SOMGT:0:36 0/1:A  | G | 0 |
|       | ## | 0   | 0.8 | 0.977 | 1.00 | 4.1    | 1.52 |      | SOMGT:0:44 0/1:C  | T                 | 0 |   |
|       |    |     |     |       |      |        |      |      |                   | SOMGT:0:26 0/1:G  | T | 0 |
|       | ## | 0   | 0.0 | 0.9   | 1.0  | D      | 1.00 | 2.6  | 4.46              | SOMGT:0:62 0/1:G  | A | 0 |
|       |    |     |     |       |      |        |      |      |                   | SOMGT:0:37 0/1:C  | T | 0 |
|       |    |     |     |       |      |        |      |      |                   | SOMGT:0:20 0/1:C  | T | 0 |

|       |    |                       |                    |         |                     |   |   |
|-------|----|-----------------------|--------------------|---------|---------------------|---|---|
|       |    | 0.0 0.9 0.9991,D      | 5.1 3.24.          |         | SOMGT:0:13 0/1:2 G  | A | 0 |
| ##### | ## | 0 . . . . .           |                    | 0       | SOMGT:0:59 0/1:3 C  | T | 0 |
| 5E-04 | 0  | 0 . . . . .           |                    |         | SOMGT:0:15 0/1:2 C  | T | 0 |
|       | ## | 0 . . . . .           |                    |         | SOMGT:0:13 0/1:1 C  | T | 0 |
|       | ## | 0 . . . . .           |                    |         | SOMGT:0:57 0/1:7 G  | A | 0 |
|       |    |                       |                    |         | SOMGT:0:64 0/1:1 A  | G | 0 |
|       |    |                       | 1.44.              |         | SOMGT:0:57 0/1:3 G  | T | 0 |
|       |    |                       |                    |         | SOMGT:0:49 0/1:1 G  | A | 0 |
|       |    |                       |                    | 0 0     | SOMGT:0:14 0/1:3 G  | A | 0 |
|       |    |                       |                    |         | SOMGT:0:39 0/1:2 G  | T | 0 |
|       |    |                       |                    |         | SOMGT:0:10 0/1:1 C  | T | 0 |
|       |    |                       |                    |         | SOMGT:0:22 0/1:2 C  | T | 0 |
|       |    |                       |                    |         | SOMGT:0:41 0/1:7 A  | G | 0 |
|       |    |                       |                    |         | SOMGT:0:87 0/1:1 G  | A | 0 |
|       |    |                       | 2.1 . . . . .      |         | SOMGT:0:66 0/1:1 G  | T | 0 |
|       |    |                       |                    |         | SOMGT:0:65 0/1:3 C  | A | 0 |
|       | ## | 0 . . . . .           |                    | 0 .     | SOMGT:0:62 0/1:3 G  | A | 0 |
|       |    |                       | 2.8 . . . . .      |         | SOMGT:0:62 0/1:3 T  | G | 0 |
|       |    |                       |                    |         | SOMGT:0:35 0/1:2 C  | T | 0 |
|       |    |                       |                    |         | SOMGT:0:19 0/1:3 G  | T | 0 |
|       | ## | 0 0.1 0.9 0.9971,D    | 4.5 4.18.          |         | SOMGT:0:11 0/1:1 C  | T | 0 |
|       |    |                       | 3.18.              |         | SOMGT:0:80 0/1:1 C  | T | 0 |
|       |    |                       |                    |         | SOMGT:0:59 0/1:1 C  | T | 0 |
|       |    |                       |                    |         | SOMGT:0:83 0/1:1 G  | A | 0 |
|       |    |                       |                    |         | SOMGT:0:23 0/1:2 G  | A | 0 |
|       |    |                       |                    | 0.2 0.3 | SOMGT:0:9,(0/1:7 A  | G | 0 |
|       | 0  | 0 . . . . .           | 3.4 . . . . .      |         | SOMGT:0:46 0/1:3 C  | T | 0 |
|       |    |                       |                    |         | SOMGT:0:20 0/1:3 A  | G | 0 |
| ##### | ## | 0 0.0 0.0 0.4731,N    | 2.27 . . . . .     |         | SOMGT:0:55 0/1:3 G  | A | 0 |
|       |    |                       | 3.7 . . . . .      |         | SOMGT:0:14 0/1:2 G  | A | 0 |
|       | ## | 0 0.0 0.9 1.0,D 1.000 | 5.3 5.31.          |         | SOMGT:0:41 0/1:3 C  | T | 0 |
|       |    |                       | 1.41 . . . . .     |         | SOMGT:0:50 0/1:3 C  | A | 0 |
|       |    | 0.0 0.51,I            | 3.5 2.51 . . . . . |         | SOMGT:0:83 0/1:1 G  | A | 0 |
|       |    |                       |                    |         | SOMGT:0:63 0/1:1 C  | T | 0 |
|       |    |                       |                    |         | SOMGT:0:16 0/1:2 G  | T | 0 |
|       |    |                       |                    | 0 .     | DB:3GT:0:31 0/1:3 A | T | 0 |
|       |    |                       | 5.5 3.34 . . . . . |         | SOMGT:0:10 0/1:1 C  | T | 0 |
|       |    |                       |                    |         | SOMGT:0:8,(0/1:3 G  | A | 0 |
|       |    |                       |                    |         | SOMGT:0:26 0/1:3 A  | G | 0 |
|       |    |                       |                    |         | SOMGT:0:84 0/1:1 G  | T | 0 |
|       | ## | 0 . . . . .           |                    |         | SOMGT:0:10 0/1:2 C  | T | 0 |
|       |    |                       | 2.8 . . . . .      |         | SOMGT:0:21 0/1:2 C  | A | 0 |
|       |    |                       |                    |         | SOMGT:0:50 0/1:3 C  | T | 0 |
|       |    | 0.0 0.9 1.0,D 0.978   | 4.8 2.38 . . . . . |         | SOMGT:0:38 0/1:2 T  | C | 0 |
|       |    |                       |                    |         | SOMGT:0:29 0/1:2 C  | T | 0 |
|       |    |                       |                    |         | SOMGT:0:41 0/1:3 C  | T | 0 |
|       | ## | 0 0.0 1.0 1.0,D 1,D   | 3.9 5.02 . . . . . |         | SOMGT:0:11 0/1:1 C  | T | 0 |
|       |    |                       | 3.2 1.45 . . . . . |         | SOMGT:0:41 0/1:7 G  | C | 0 |
|       | ## | 0 . . . . .           |                    |         | SOMGT:0:41 0/1:3 G  | A | 0 |
|       |    |                       | 4.7 . . . . .      |         | SOMGT:0:57 0/1:7 C  | T | 0 |
|       |    |                       |                    |         | SOMGT:0:63 0/1:3 G  | T | 0 |
|       |    |                       |                    |         | SOMGT:0:36 0/1:3 G  | T | 0 |
|       |    |                       |                    |         | SOMGT:0:55 0/1:3 G  | C | 0 |

|       |    |     |     |       |       |       |      |      |      |            |            |       |   |   |   |
|-------|----|-----|-----|-------|-------|-------|------|------|------|------------|------------|-------|---|---|---|
| ##### | ## | 0   | 0.0 | 0.9   | 1.0,D | 1.00C | 3.4  | 4.53 | .    | SOMGT:0:13 | 0/1:z      | C     | T | 0 |   |
| .     | .  | .   | .   | .     | .     | .     | .    | .    | .    | SOMGT:0:34 | 0/1:z      | A     | G | 0 |   |
| .     | .  | .   | .   | .     | .     | .     | 2.6  | 1.73 | .    | SOMGT:0:31 | 0/1:z      | C     | A | 0 |   |
| .     | 0  | 0   | .   | .     | .     | .     | .    | .    | .    | SOMGT:0:43 | 0/1:z      | G     | A | 0 |   |
| .     | .  | .   | .   | .     | .     | .     | .    | .    | .    | SOMGT:0:8  | 0/1:z      | C     | A | 0 |   |
| .     | 0  | 0   | 0.3 | 0.98  | 1.0   | 0.987 | 5.5  | 2.78 | 0    | 0          | SOMGT:0:70 | 0/1:z | C | T | 0 |
| .     | .  | .   | 0.9 | 1.0,D | 1,D   |       | 4.6  | 2.18 | .    | SOMGT:0:83 | 0/1:z      | G     | A | 0 |   |
| .     | .  | 0.0 | 0.9 | 1.0,D | 1.00C |       | 4.1  | 3.94 | .    | SOMGT:0:24 | 0/1:z      | G     | A | 0 |   |
| .     | ## | 0   | 0.0 | 0.9   | 1.0,D | 1,N   | 1.46 | 0    | .    | SOMGT:0:65 | 0/1:z      | G     | A | 0 |   |
| .     | .  | .   | .   | .     | .     | .     | .    | .    | .    | SOMGT:0:62 | 0/1:z      | G     | A | 0 |   |
| ##### | ## | 0   | .   | .     | .     | .     | .    | .    | .    | SOMGT:0:41 | 0/1:z      | C     | T | 0 |   |
| .     | .  | .   | .   | .     | .     | .     | .    | .    | .    | SOMGT:0:20 | 0/1:z      | G     | A | 0 |   |
| .     | .  | .   | .   | .     | .     | .     | .    | .    | .    | SOMGT:0:32 | 0/1:z      | G     | A | 0 |   |
| .     | .  | 0.0 | 0.9 | 1.0,D | 1,D   |       | 5.3  | 5.05 | .    | SOMGT:0:80 | 0/1:z      | G     | A | 0 |   |
| .     | .  | .   | .   | .     | .     | .     | .    | .    | .    | SOMGT:0:22 | 0/1:z      | C     | A | 0 |   |
| .     | ## | .   | .   | .     | .     | .     | .    | 0    | 0    | SOMGT:0:28 | 0/1:z      | C     | T | 0 |   |
| .     | .  | .   | .   | .     | .     | .     | .    | .    | .    | SOMGT:0:24 | 0/1:z      | G     | A | 0 |   |
| .     | .  | .   | .   | .     | .     | .     | .    | .    | .    | SOMGT:0:66 | 0/1:z      | C     | T | 0 |   |
| .     | .  | .   | .   | .     | .     | .     | .    | .    | .    | SOMGT:0:26 | 0/1:z      | C     | A | 0 |   |
| .     | .  | .   | .   | .     | 1,D   |       | 3.8  | .    | .    | SOMGT:0:18 | 0/1:z      | T     | C | 0 |   |
| .     | .  | 0.1 | 0.8 | 0.99  | 4.0   | 0.964 | 4.5  | 2.47 | .    | SOMGT:0:10 | 0/1:z      | G     | A | 0 |   |
| .     | ## | 0   | 0.0 | 0.9   | 1.0,D | 1.00C | 3.3  | 3.15 | .    | SOMGT:0:12 | 0/1:z      | G     | A | 0 |   |
| .     | .  | .   | .   | .     | .     | .     | 1.54 | .    | .    | SOMGT:0:89 | 0/1:z      | C     | T | 0 |   |
| 2E-04 | 0  | 0   | .   | .     | .     | .     | 2.5  | .    | 0    | 0          | SOMGT:0:47 | 0/1:z | G | A | 0 |
| .     | .  | .   | .   | .     | .     | .     | 2.6  | .    | .    | SOMGT:0:10 | 0/1:z      | G     | A | 0 |   |
| .     | .  | 0.3 | 0.0 | 0.71  | 6.0   | 0.995 | 3.1  | .    | .    | SOMGT:0:15 | 0/1:z      | G     | A | 0 |   |
| .     | .  | .   | .   | .     | .     | .     | 2.2  | .    | .    | SOMGT:0:45 | 0/1:z      | A     | G | 0 |   |
| .     | .  | .   | .   | .     | .     | .     | 2.3  | .    | .    | SOMGT:0:41 | 0/1:z      | A     | G | 0 |   |
| .     | .  | .   | .   | .     | .     | .     | .    | 0    | .    | SOMGT:0:27 | 0/1:z      | G     | A | 0 |   |
| .     | .  | 0.3 | 0.0 | 0.13  | 1.0   | 0.64  | 4.1  | 2.86 | .    | SOMGT:0:17 | 0/1:z      | A     | T | 0 |   |
| .     | .  | .   | .   | .     | .     | .     | .    | .    | .    | SOMGT:0:20 | 0/1:z      | C     | A | 0 |   |
| .     | .  | .   | .   | .     | .     | .     | .    | .    | .    | SOMGT:0:11 | 0/1:z      | G     | A | 0 |   |
| .     | .  | 0.0 | 0.8 | 0.98  | 3.1,D |       | 5.9  | 3.34 | .    | SOMGT:0:22 | 0/1:z      | G     | T | 0 |   |
| .     | .  | .   | .   | .     | .     | .     | .    | .    | .    | SOMGT:0:39 | 0/1:z      | C     | T | 0 |   |
| .     | .  | .   | .   | .     | .     | .     | .    | .    | .    | SOMGT:0:27 | 0/1:z      | G     | T | 0 |   |
| .     | ## | 0   | 0.0 | 0.0   | 0.31  | 3.0   | 0.99 | 4.8  | 1.42 | .          | SOMGT:0:81 | 0/1:z | C | T | 0 |
| .     | ## | 0   | .   | .     | .     | .     | 4    | .    | .    | SOMGT:0:35 | 0/1:z      | C     | T | 0 |   |
| .     | .  | .   | .   | .     | .     | .     | .    | .    | .    | SOMGT:0:49 | 0/1:z      | A     | G | 0 |   |
| .     | .  | 0.0 | 0.9 | 1.0,D | 1,D   |       | 5.9  | 3.90 | .    | SOMGT:0:36 | 0/1:z      | A     | G | 0 |   |
| .     | ## | 0   | .   | .     | .     | .     | .    | 0    | .    | SOMGT:0:34 | 0/1:z      | G     | A | 0 |   |
| .     | .  | .   | .   | .     | .     | .     | 3.1  | .    | .    | SOMGT:0:28 | 0/1:z      | A     | G | 0 |   |
| .     | ## | 0   | 0.0 | 0.7   | 0.99  | 1.00C | 4.8  | 4.35 | .    | SOMGT:0:85 | 0/1:z      | G     | A | 0 |   |
| .     | .  | .   | .   | .     | .     | .     | .    | .    | .    | SOMGT:0:18 | 0/1:z      | C     | T | 0 |   |
| .     | .  | .   | .   | .     | .     | .     | .    | .    | .    | SOMGT:0:14 | 0/1:z      | G     | A | 0 |   |
| .     | .  | 0.0 | 0.9 | 0.99  | 0.997 |       | 3.46 | .    | .    | SOMGT:0:28 | 0/1:z      | G     | T | 0 |   |
| ##### | 0  | 0   | .   | .     | 1,D   |       | .    | .    | .    | SOMGT:0:41 | 0/1:z      | C     | T | 0 |   |
| .     | .  | 0.0 | 0.4 | 0.52  | 1,N   |       | 3.8  | 2.23 | .    | SOMGT:0:60 | 0/1:z      | T     | C | 0 |   |
| .     | .  | .   | .   | .     | .     | .     | 1.56 | .    | .    | SOMGT:0:25 | 0/1:z      | A     | G | 0 |   |
| .     | .  | 0.0 | 0.8 | 0.99  | 3.1,N |       | .    | .    | .    | SOMGT:0:50 | 0/1:z      | C     | A | 0 |   |
| .     | .  | .   | .   | .     | .     | .     | .    | .    | .    | SOMGT:0:42 | 0/1:z      | G     | T | 0 |   |
| .     | .  | .   | .   | .     | .     | .     | 1.76 | .    | .    | SOMGT:0:56 | 0/1:z      | C     | T | 0 |   |
| .     | .  | .   | .   | .     | .     | .     | 2.7  | 3.73 | .    | SOMGT:0:17 | 0/1:z      | C     | T | 0 |   |
| ##### | ## | 0   | .   | .     | .     | .     | .    | .    | .    | SOMGT:0:30 | 0/1:z      | C     | T | 0 |   |
| .     | ## | 0   | 0.0 | 0.0   | B     | 1,N   | .    | .    | .    | SOMGT:0:90 | 0/1:z      | G     | A | 0 |   |

|       |    |     |     |      |       |       |                |                          |   |   |
|-------|----|-----|-----|------|-------|-------|----------------|--------------------------|---|---|
|       |    | 0.3 | 0.2 | 0.83 | 0.86  | 2.8   |                | SOMGT:0:16 0/1:2 G       | A | 0 |
| ##### | ## | 0   |     |      |       |       | 0              | SOMGT:0:62 0/1:1 C       | T | 0 |
|       |    | 0.0 | 0.9 | 1.0  | D     | 0.99  | 2.19           | SOMGT:0:78 0/1:1 G       | T | 0 |
|       |    |     |     |      |       |       |                | SOMGT:0:12 0/1:1 C       | T | 0 |
|       |    |     |     |      |       |       |                | SOMGT:0:13 0/1:1 C       | T | 0 |
| 6E-04 | 0  | 0   | 0.0 | 0.2  | 0.54  | 1,D   | 3.5 2.62       | DB;S GT:0:53 0/1:1 G     | A | 0 |
| 2E-04 | ## | 0   |     |      |       |       |                | SOMGT:0:46 0/1:1 C       | T | 0 |
|       |    |     |     |      |       |       |                | SOMGT:0:22 0/1:1 C       | T | 0 |
|       | 0  | 0   |     |      |       |       | 0              | SOMGT:0:14 0/1:2 G       | A | 0 |
|       |    | 0.0 | 0.1 | 0.87 | 0.57  | C     |                | SOMGT:0:45 0/1:1 G       | A | 0 |
|       |    |     |     |      |       |       | 1.24           | SOMGT:0:56 0/1:1 C       | A | 0 |
| ##### | ## | 0   | 0.1 | 0.9  | 1.0   | D     | 1,D 2.1 3.16   | SOMGT:0:11 0/1:1 C       | T | 0 |
|       |    |     |     |      |       |       | 2.19           | SOMGT:0:11 0/1:1 G       | A | 0 |
|       |    |     |     |      |       |       |                | SOMGT:0:18 0/1:1 G       | A | 0 |
|       |    |     |     |      |       |       | 0              | SOMGT:0:16 0/1:2 C       | T | 0 |
| ##### | ## | 0   |     |      |       |       | 1.68           | SOMGT:0:19 0/1:2 G       | A | 0 |
|       | 0  | 0   |     |      |       |       |                | SOMGT:0:11 0/1:2 G       | A | 0 |
|       |    | 0.5 | 0.1 | 0.19 | 0.99  | E     | 4.7 1.33       | SOMGT:0:11 0/1:1 G       | T | 0 |
|       |    |     |     |      |       |       |                | SOMGT:0:33 0/1:1 C       | A | 0 |
| ##### | ## | 0   |     |      |       |       | 1.31           | SOMGT:0:14 0/1:2 C       | T | 0 |
|       |    |     |     |      |       |       |                | SOMGT:0:9,1 0/1:2 C      | T | 0 |
|       |    |     |     |      |       |       |                | SOMGT:0:25 0/1:2 G       | A | 0 |
|       |    |     |     |      |       |       |                | SOMGT:0:27 0/1:1 C       | T | 0 |
|       | ## | 0   | 0.0 | 0.3  | 0.81  | 1,N   | 2.00           | SOMGT:0:82 0/1:1 G       | A | 0 |
|       |    |     |     |      |       | 1,D   | 3.7 6.30       | SOMGT:0:66 0/1:1 G       | A | 0 |
| 7E-04 | 0  | 0   | 0.0 | 0.8  | 0.99  | 1,N   | 4.56           | SOMGT:0:53 0/1:1 G       | A | 0 |
|       |    |     |     |      |       |       |                | SOMGT:0:29 0/1:1 G       | A | 0 |
|       |    | 0.0 | 0.3 | 0.41 | 1,D   |       | 4 4.18         | SOMGT:0:10 0/1:1 T       | C | 0 |
|       |    |     |     |      |       |       | 1.51           | SOMGT:0:63 0/1:1 C       | T | 0 |
|       |    |     |     |      |       |       | 0              | SOMGT:0:94 0/1:1 G       | A | 0 |
|       | ## | 0   |     |      |       |       | 1.52           | SOMGT:0:97 0/1:1 G       | A | 0 |
|       |    |     |     |      |       |       |                | SOMGT:0:31 0/1:1 T       | C | 0 |
| ##### | ## | 0   | 0.0 | 0.1  | 0.53  | 1,000 | 5.3 3.72       | SOMGT:0:92 0/1:1 C       | T | 0 |
| ##### | 0  | 0   |     |      |       |       | 0              | SOMGT:0:10 0/1:1 C       | T | 0 |
| ##### | ## | 0   | 0.0 | 0.0  | 0.14  | 1,D   | 4.1 2.79       | SOMGT:0:19 0/1:1 G       | A | 0 |
|       | ## | 0   |     |      |       |       |                | SOMGT:0:76 0/1:1 C       | T | 0 |
| ##### | ## | 0   | 0.0 | 0.9  | 1.0   | D     | 1,000 5.4 5.41 | SOMGT:0:39 0/1:1 G       | A | 0 |
|       |    |     |     |      |       |       | 1.28           | SOMGT:0:10 0/1:2 G       | T | 0 |
|       |    |     |     |      |       |       |                | SOMGT:0:10 0/1:1 C       | A | 0 |
|       | ## | 0   |     |      |       |       |                | SOMGT:0:85 0/1:1 C       | T | 0 |
| 0.021 | 0  | 0   | 0.5 | 0.0  | 0.08  | 1,N   |                | 0 0 DB;S GT:0:16 0/1:1 C | T | 0 |
|       | ## | 0   |     |      |       |       |                | SOMGT:0:19 0/1:1 C       | T | 0 |
|       |    |     |     |      |       |       | 2.2            | SOMGT:0:16 0/1:1 T       | G | 0 |
|       |    | 0.1 | 0.0 | 0.00 | 1,N   |       | 0              | SOMGT:0:78 0/1:1 C       | T | 0 |
|       |    |     |     |      |       |       |                | SOMGT:0:8,1 0/1:1 C      | T | 0 |
|       |    |     |     |      |       |       |                | SOMGT:0:11 0/1:1 C       | G | 0 |
|       | 0  | 0   |     |      |       |       | 0              | SOMGT:0:12 0/1:1 G       | A | 0 |
|       | ## | 0   | 0.3 | 0.0  | 0.0   | B     | 1,N            | SOMGT:0:11 0/1:1 C       | T | 0 |
|       |    |     |     |      |       |       |                | SOMGT:0:11 0/1:2 C       | T | 0 |
|       |    |     |     |      |       |       |                | SOMGT:0:11 0/1:2 A       | G | 0 |
|       |    | 0.1 | 0.5 | 0.95 | 1,000 |       | 4.3 2.96       | 0 SOMGT:0:37 0/1:1 G     | A | 0 |
|       | ## | 0   | 0.0 | 0.9  | 1.0   | D     | 1,000 4.8 2.99 | SOMGT:0:12 0/1:1 G       | A | 0 |
|       |    | 0.0 | 0.7 | 0.99 | 0.67  | 1     | 2.8 3.44       | SOMGT:0:61 0/1:1 C       | T | 0 |
|       |    | 1.0 | 0.1 | 0.32 | 0.91  | 1     | 5.5            | SOMGT:0:75 0/1:1 G       | A | 0 |



|       |    |     |     |        |       |                |                     |   |   |
|-------|----|-----|-----|--------|-------|----------------|---------------------|---|---|
|       |    |     |     |        |       |                | SOMGT:0:31 0/1:G    | A | 0 |
|       |    | 0.2 | 0.2 | 0.5141 | 1.000 |                | SOMGT:0:47 0/1:G    | T | 0 |
|       |    |     |     |        |       |                | SOMGT:0:10 0/1:G    | A | 0 |
|       | ## | 0   |     |        |       | 1.42           | SOMGT:0:13 0/1:G    | A | 0 |
|       | ## | 0   |     |        |       |                | SOMGT:0:16 0/1:G    | A | 0 |
|       |    |     |     |        |       |                | SOMGT:0:9,(0/1:A    | G | 0 |
|       |    | 0.0 | 0.9 | 0.993  | 1,D   | 4.4 4.77       | SOMGT:0:70 0/1:C    | T | 0 |
|       | ## | 0   |     |        |       |                | SOMGT:0:25 0/1:C    | T | 0 |
| ##### | ## | 0   |     |        |       |                | SOMGT:0:52 0/1:G    | A | 0 |
| ##### | ## | 0   | 0.0 | 0.9    | 1.0,D | 1,D 4.8 5.30   | SOMGT:0:49 0/1:C    | T | 0 |
|       |    |     |     |        |       |                | SOMGT:0:11 0/1:A    | G | 0 |
|       |    |     |     |        |       |                | SOMGT:0:31 0/1:A    | T | 0 |
|       |    |     |     |        |       |                | SOMGT:0:39 0/1:G    | T | 0 |
| 2E-04 | ## | 0   | 0.2 | 0.0    | 0.012 | 1,N 1.25 0     | SOMGT:0:13 0/1:G    | A | 0 |
|       |    |     | 0.0 | 0.9    | 0.998 | 1.000 3 3.50   | SOMGT:0:55 0/1:G    | A | 0 |
|       |    |     | 0.0 | 0.8    | 0.99  | 1,D 4.5 4.51   | SOMGT:0:53 0/1:A    | C | 0 |
|       |    |     | 0.2 | 0.2    | 0.641 | 1,N 2.4        | SOMGT:0:11 0/1:C    | G | 0 |
|       |    |     |     |        |       |                | SOMGT:0:34 0/1:C    | T | 0 |
|       |    |     | 0.0 | 0.9    | 1.0,D | 1.000 2.2 3.41 | SOMGT:0:94 0/1:G    | A | 0 |
|       |    |     |     |        |       |                | SOMGT:0:38 0/1:G    | A | 0 |
|       |    |     |     |        |       |                | SOMGT:0:71 0/1:C    | T | 0 |
|       |    |     |     |        |       |                | DB;SOMGT:0:46 0/1:G | A | 0 |
|       |    |     |     |        |       |                | SOMGT:0:32 0/1:T    | C | 0 |
|       |    |     | 0.0 | 0.9    | 1.0,D | 1,N 1.71       | SOMGT:0:80 0/1:G    | A | 0 |
|       | ## | 0   |     |        |       |                | SOMGT:0:59 0/1:G    | A | 0 |
|       |    |     | 0.3 | 0.1    | 0.804 | 0.988 4.7 2.67 | SOMGT:0:90 0/1:C    | T | 0 |
|       |    |     |     |        |       |                | SOMGT:0:28 0/1:T    | C | 0 |
|       |    |     |     |        |       |                | SOMGT:0:98 0/1:G    | T | 0 |
|       |    |     | 0.0 | 0.9    | 1.0,D | 0.999 4.4 4.50 | SOMGT:0:50 0/1:C    | T | 0 |
| ##### | ## | 0   |     |        |       |                | SOMGT:0:24 0/1:C    | T | 0 |
|       |    |     |     |        |       |                | SOMGT:0:56 0/1:C    | T | 0 |
|       |    |     |     |        |       |                | SOMGT:0:21 0/1:C    | A | 0 |
|       |    |     |     |        |       |                | SOMGT:0:17 0/1:T    | C | 0 |
|       |    |     |     |        |       |                | SOMGT:0:11 0/1:T    | C | 0 |
|       |    |     |     |        |       |                | SOMGT:0:34 0/1:C    | T | 0 |
|       | ## | 0   | 0.4 | 0.9    | 0.997 | 1,D 5.8 2.48   | SOMGT:0:72 0/1:C    | T | 0 |
| ##### | ## | 0   | 0.0 | 0.0    | 0.022 | 1.000 2.1 2.96 | SOMGT:0:23 0/1:C    | T | 0 |
|       |    |     |     |        |       |                | SOMGT:0:84 0/1:C    | G | 0 |
|       |    |     |     |        |       |                | SOMGT:0:8,(0/1:A    | C | 0 |
|       | ## | 0   | 0.0 | 0.0    | 0.168 | 1,D 4.9 3.90   | SOMGT:0:58 0/1:G    | A | 0 |
|       |    |     |     |        |       |                | SOMGT:0:69 0/1:G    | A | 0 |
|       |    |     |     |        |       | 2.4            | SOMGT:0:20 0/1:T    | C | 0 |
|       |    |     |     |        |       |                | SOMGT:0:12 0/1:C    | T | 0 |
|       |    |     |     |        |       |                | SOMGT:0:9,(0/1:C    | T | 0 |
|       |    |     |     |        |       |                | DB;SOMGT:0:19 0/1:C | A | 0 |
|       |    |     |     |        |       |                | SOMGT:0:42 0/1:C    | G | 0 |
|       |    |     |     |        |       |                | SOMGT:0:35 0/1:C    | T | 0 |
|       |    |     |     |        |       |                | SOMGT:0:14 0/1:G    | A | 0 |
|       |    |     | 0.2 | 0.0    | 0.021 | 0.935 3.2 1.73 | SOMGT:0:32 0/1:G    | T | 0 |
| 0.002 | 0  | 0   | 0.2 | 0.0    | 0.103 | 1,N 2.00       | SOMGT:0:62 0/1:C    | T | 0 |
|       |    |     |     |        |       | 2.2            | SOMGT:0:13 0/1:C    | T | 0 |
|       | ## | 0   |     |        |       |                | SOMGT:0:10 0/1:G    | A | 0 |
|       |    |     |     |        |       |                | SOMGT:0:45 0/1:A    | G | 0 |
|       |    |     |     |        |       |                | SOMGT:0:19 0/1:G    | A | 0 |

|       |    |     |       |       |       |       |      |      |                      |                    |   |   |
|-------|----|-----|-------|-------|-------|-------|------|------|----------------------|--------------------|---|---|
| .     | .  | .   | .     | .     | .     | .     | .    | .    | SOMGT:0:21 0/1:2 C   | A                  | 0 |   |
| .     | .  | .   | .     | .     | .     | .     | .    | .    | SOMGT:0:38 0/1:7 A   | G                  | 0 |   |
| .     | .  | .   | .     | .     | 2.5   | 3.60  | .    | .    | SOMGT:0:72 0/1:7 G   | A                  | 0 |   |
| .     | .  | .   | .     | .     | 1.35  | .     | .    | .    | SOMGT:0:15 0/1:2 T   | C                  | 0 |   |
| ##    | 0  | .   | .     | .     | .     | .     | .    | 0    | SOMGT:0:12 0/1:7 G   | A                  | 0 |   |
| ##    | 0  | 0.1 | 0.2   | 0.968 | 0.992 | 4.2   | 3.28 | .    | SOMGT:0:40 0/1:7 G   | A                  | 0 |   |
| .     | .  | .   | .     | .     | 2.4   | .     | .    | .    | SOMGT:0:62 0/1:7 G   | A                  | 0 |   |
| ##    | 0  | 0.7 | 0.986 | 1.000 | 4.8   | 3.90  | .    | .    | SOMGT:0:13 0/1:2 G   | A                  | 0 |   |
| .     | .  | .   | .     | .     | .     | .     | .    | .    | SOMGT:0:44 0/1:7 C   | T                  | 0 |   |
| .     | .  | .   | .     | .     | 2.4   | .     | .    | .    | SOMGT:0:26 0/1:2 G   | A                  | 0 |   |
| .     | .  | 0.0 | 0.0   | 0.503 | 1,N   | 3     | 2.64 | .    | SOMGT:0:14 0/1:2 C   | T                  | 0 |   |
| .     | .  | 0.4 | 0.0   | 0.009 | 0.551 | 3.6   | 2.75 | .    | SOMGT:0:65 0/1:7 C   | T                  | 0 |   |
| .     | .  | .   | .     | .     | 2.41  | .     | .    | .    | SOMGT:0:9,(0/1:7 C   | A                  | 0 |   |
| .     | .  | 0.0 | 0.2   | 0.748 | 1.000 | 3.5   | 2.25 | .    | SOMGT:0:42 0/1:2 G   | C                  | 0 |   |
| .     | .  | .   | .     | .     | 1,A   | 4.6   | 7.89 | .    | SOMGT:0:31 0/1:2 G   | T                  | 0 |   |
| .     | .  | 0.2 | 0.8   | 0.991 | 0.983 | 4.8   | 2.51 | .    | SOMGT:0:69 0/1:7 G   | T                  | 0 |   |
| .     | .  | 0.0 | 0.0   | 0.149 | 0.884 | 2.9   | 2.50 | .    | SOMGT:0:41 0/1:7 C   | T                  | 0 |   |
| .     | .  | 0.0 | 0.9   | 1.0,D | 1,D   | 4.2   | 3.92 | .    | SOMGT:0:65 0/1:7 C   | A                  | 0 |   |
| .     | .  | .   | .     | .     | 1,A   | 4.13  | .    | .    | SOMGT:0:91 0/1:7 C   | A                  | 0 |   |
| .     | .  | .   | .     | .     | .     | .     | .    | 0 0  | SOMGT:0:73 0/1:7 T   | C                  | 0 |   |
| .     | .  | .   | .     | .     | .     | .     | .    | .    | SOMGT:0:24 0/1:2 C   | T                  | 0 |   |
| .     | .  | .   | .     | .     | .     | .     | .    | .    | SOMGT:0:19 0/1:2 G   | A                  | 0 |   |
| .     | .  | .   | .     | .     | .     | .     | .    | .    | SOMGT:0:41 0/1:2 T   | G                  | 0 |   |
| .     | .  | 0.0 | 0.012 | 1,N   | 2.49  | .     | .    | .    | SOMGT:0:59 0/1:2 G   | T                  | 0 |   |
| ##    | 0  | 0.0 | 0.316 | 1,N   | 1.91  | 0     | .    | .    | SOMGT:0:10 0/1:7 C   | T                  | 0 |   |
| .     | .  | .   | .     | .     | .     | .     | .    | .    | SOMGT:0:14 0/1:7 C   | T                  | 0 |   |
| .     | .  | .   | .     | .     | .     | .     | .    | .    | SOMGT:0:59 0/1:7 C   | T                  | 0 |   |
| .     | .  | .   | .     | .     | .     | .     | .    | .    | SOMGT:0:27 0/1:2 C   | T                  | 0 |   |
| .     | .  | .   | .     | .     | 2.03  | .     | .    | .    | SOMGT:0:10 0/1:7 C   | T                  | 0 |   |
| .     | .  | 0.0 | 0.9   | 1.0,D | 0.989 | 3.8   | 2.47 | .    | SOMGT:0:10 0/1:7 C   | A                  | 0 |   |
| .     | .  | .   | .     | .     | 1.42  | .     | .    | .    | SOMGT:0:9,(0/1:2 T   | C                  | 0 |   |
| .     | .  | 0.0 | 0.5   | 0.712 | 1,D   | 2.4   | 3.32 | .    | SOMGT:0:12 0/1:7 G   | T                  | 0 |   |
| .     | .  | 0.0 | 0.8   | 0.995 | 0.997 | 5.3   | 2.86 | .    | SOMGT:0:10 0/1:2 C   | T                  | 0 |   |
| ##### | ## | 0   | 0.0   | 0.9   | 0.997 | 1,D   | 4.7  | 3.93 | 0 0                  | SOMGT:0:14 0/1:7 C | T | 0 |
| .     | .  | .   | .     | .     | .     | .     | .    | .    | SOMGT:0:34 0/1:2 G   | A                  | 0 |   |
| .     | .  | .   | .     | .     | .     | .     | .    | .    | SOMGT:0:27 0/1:2 G   | A                  | 0 |   |
| .     | .  | .   | .     | .     | .     | .     | .    | .    | SOMGT:0:66 0/1:7 C   | T                  | 0 |   |
| .     | .  | .   | .     | .     | .     | .     | .    | .    | SOMGT:0:9,(0/1:2 C   | G                  | 0 |   |
| .     | .  | 0.0 | 0.2   | 0.957 | 1,D   | 4.1   | 3.36 | .    | SOMGT:0:20 0/1:2 G   | A                  | 0 |   |
| .     | .  | .   | .     | .     | .     | .     | .    | .    | SOMGT:0:51 0/1:7 G   | A                  | 0 |   |
| .     | .  | .   | .     | .     | .     | .     | .    | .    | SOMGT:0:46 0/1:7 G   | A                  | 0 |   |
| .     | .  | .   | .     | .     | 4.4   | 2.17  | .    | .    | SOMGT:0:47 0/1:2 A   | G                  | 0 |   |
| .     | .  | .   | .     | .     | .     | .     | .    | .    | SOMGT:0:17 0/1:2 C   | T                  | 0 |   |
| .     | .  | .   | .     | .     | .     | .     | .    | .    | SOMGT:0:23 0/1:2 C   | T                  | 0 |   |
| .     | .  | .   | .     | .     | 2.5   | 1.43  | .    | .    | SOMGT:0:64 0/1:7 G   | T                  | 0 |   |
| .     | .  | .   | .     | .     | .     | .     | .    | .    | SOMGT:0:63 0/1:7 C   | T                  | 0 |   |
| 2E-04 | 0  | 0   | 0.0   | 0.9   | 1.0,D | 1.000 | 3.1  | 4.07 | .                    | SOMGT:0:17 0/1:2 G | A | 0 |
| 0.002 | 0  | 0   | .     | .     | .     | .     | 4.4  | 1.63 | .                    | SOMGT:0:10 0/1:7 G | A | 0 |
| .     | .  | .   | .     | .     | .     | .     | .    | .    | SOMGT:0:17 0/1:2 G   | A                  | 0 |   |
| .     | .  | .   | .     | .     | .     | .     | .    | 0 0  | DB;S GT:0:20 0/1:2 T | G                  | 0 |   |
| ##### | ## | 0   | .     | .     | .     | .     | .    | .    | SOMGT:0:40 0/1:7 C   | T                  | 0 |   |
| .     | .  | .   | .     | .     | .     | .     | .    | .    | SOMGT:0:21 0/1:2 G   | A                  | 0 |   |
| .     | 0  | 0   | 0.1   | 0.0   | 0.001 | 0.970 | 1.31 | .    | SOMGT:0:66 0/1:2 G   | A                  | 0 |   |
| .     | .  | .   | .     | .     | 1,D   | 2.8   | 1.87 | .    | SOMGT:0:96 0/1:7 G   | A                  | 0 |   |

|       |    |                       |  |           |   |               |                       |   |   |
|-------|----|-----------------------|--|-----------|---|---------------|-----------------------|---|---|
|       |    |                       |  |           |   |               | SOMGT:0:15 0/1:2 A    | G | 0 |
|       |    | 0.0:1.0,1.0,D 1,D     |  | 2.92.     |   |               | SOMGT:0:13 0/1:2 T    | C | 0 |
|       |    |                       |  |           |   |               | SOMGT:0:49 0/1:2 A    | G | 0 |
| 0.004 | 0  | 0                     |  |           |   | 0 0           | SOMGT:0:66 0/1:2 T    | G | 0 |
|       |    |                       |  |           |   |               | SOMGT:0:90 0/1:2 G    | A | 0 |
|       |    | 0.3:0.5 0.782.        |  | 4.8 3.58. |   |               | SOMGT:0:17 0/1:2 T    | G | 0 |
|       |    |                       |  |           |   |               | SOMGT:0:11 0/1:2 T    | C | 0 |
|       |    |                       |  |           |   |               | SOMGT:0:22 0/1:2 G    | A | 0 |
| 2E-04 | ## | 0                     |  |           |   |               | SOMGT:0:96 0/1:2 G    | A | 0 |
|       |    |                       |  | 2.9 1.43. |   |               | SOMGT:0:88 0/1:2 C    | A | 0 |
|       | ## |                       |  | 1,N       |   | 2.84.         | SOMGT:0:99 0/1:2 G    | A | 0 |
|       |    |                       |  |           |   |               | SOMGT:0:10 0/1:2 G    | T | 0 |
|       | ## | 0 0.1 0.0 0.864 1,N   |  | 2.24      | 0 |               | SOMGT:0:11 0/1:2 C    | T | 0 |
| ##### | 0  | 0 0.0 0.3 0.529 1,N   |  |           | 0 |               | SOMGT:0:47 0/1:2 G    | A | 0 |
|       | ## | 0                     |  |           |   | 0             | SOMGT:0:63 0/1:2 C    | T | 0 |
|       |    |                       |  |           |   | 1.27.         | SOMGT:0:20 0/1:2 G    | A | 0 |
|       |    |                       |  |           |   |               | SOMGT:0:37 0/1:2 G    | A | 0 |
| 2E-04 | 0  | 0                     |  |           |   |               | SOMGT:0:32 0/1:2 C    | T | 0 |
|       |    |                       |  |           |   |               | SOMGT:0:13 0/1:2 C    | T | 0 |
| ##### | ## | 0                     |  |           |   |               | SOMGT:0:89 0/1:2 C    | T | 0 |
|       |    | 0.2:0.1:0.555 1,N     |  |           |   |               | SOMGT:0:20 0/1:2 C    | T | 0 |
|       | ## | 0                     |  |           |   | 3.8 3.57 0    | SOMGT:0:17 0/1:2 T    | C | 0 |
|       |    |                       |  |           |   | 1.56.         | SOMGT:0:85 0/1:2 G    | A | 0 |
|       |    |                       |  |           |   | 0             | SOMGT:0:24 0/1:2 C    | T | 0 |
|       |    |                       |  |           |   |               | SOMGT:0:21 0/1:2 C    | T | 0 |
|       | 0  | 0                     |  |           |   | 1,A 3.4 8.95. | SOMGT:0:37 0/1:2 G    | A | 0 |
|       |    |                       |  |           |   |               | SOMGT:0:12 0/1:2 C    | T | 0 |
|       |    |                       |  |           |   |               | SOMGT:0:42 0/1:2 G    | A | 0 |
|       |    |                       |  |           |   |               | SOMGT:0:14 0/1:2 T    | C | 0 |
|       |    | 0.0 0.9:0.99,1 1,D    |  | 5.6 4.31. |   |               | SOMGT:0:55 0/1:2 A    | G | 0 |
|       |    |                       |  |           |   |               | SOMGT:0:30 0/1:2 T    | C | 0 |
| 2E-04 | ## | 0 0.0:0.5:0.928 1,N   |  | 1.82      | 0 |               | SOMGT:0:48 0/1:2 G    | A | 0 |
|       |    |                       |  |           |   |               | SOMGT:0:10 0/1:2 T    | C | 0 |
|       |    |                       |  |           |   | 0             | SOMGT:0:9,0/1:2 C     | T | 0 |
|       |    |                       |  |           |   | 0             | SOMGT:0:15 0/1:2 C    | T | 0 |
|       |    |                       |  |           |   | 0             | SOMGT:0:16 0/1:2 G    | A | 0 |
|       | ## | 0 0.3:0.0:0.142 1.000 |  | 5 2.85.   |   | 0             | SOMGT:0:55 0/1:2 C    | T | 0 |
|       |    |                       |  |           |   |               | SOMGT:0:84 0/1:2 C    | A | 0 |
|       |    |                       |  |           |   | 2.6           | SOMGT:0:14 0/1:2 G    | T | 0 |
|       |    |                       |  |           |   | 0 0           | SOMGT:0:10 0/1:2 G    | A | 0 |
| 0.009 | 0  | 0                     |  |           |   | 0 0           | DB;SOMGT:0:40 0/1:2 A | T | 0 |
|       |    |                       |  |           |   |               | SOMGT:0:14 0/1:2 A    | C | 0 |
| 2E-04 | ## | 0 0.0:0.9:1.0,D 1,D   |  | 5 5.37.   |   |               | SOMGT:0:52 0/1:2 C    | T | 0 |
|       |    |                       |  |           |   | 0             | SOMGT:0:20 0/1:2 T    | C | 0 |
|       |    |                       |  |           |   | 1.86.         | SOMGT:0:73 0/1:2 G    | A | 0 |
|       |    |                       |  |           |   |               | SOMGT:0:44 0/1:2 G    | A | 0 |
|       |    |                       |  |           |   | 2.54 0 0      | SOMGT:0:9,0/1:2 G     | A | 0 |
|       |    |                       |  |           |   |               | SOMGT:0:15 0/1:2 G    | T | 0 |
|       |    |                       |  |           |   |               | SOMGT:0:31 0/1:2 C    | T | 0 |
|       |    | 0.0 0.9:0.996 1.000   |  | 4.4 5.38. |   |               | SOMGT:0:11 0/1:2 G    | A | 0 |
| ##### | ## | 0                     |  |           |   | 3.8 3.08 0 0  | SOMGT:0:53 0/1:2 G    | A | 0 |
|       |    | 0.6:0.0 0.02,1 0.757  |  | 3.1       |   |               | SOMGT:0:29 0/1:2 G    | A | 0 |
|       |    | 0.0 0.9:1.0,D 1,D     |  | 4.5 2.75. |   |               | SOMGT:0:79 0/1:2 C    | T | 0 |
|       |    |                       |  |           |   | 1,A 4.3 8.44. | SOMGT:0:14 0/1:2 G    | A | 0 |

|       |    |   |                     |                     |      |      |     |                     |   |   |
|-------|----|---|---------------------|---------------------|------|------|-----|---------------------|---|---|
| 2E-04 | ## | 0 |                     |                     |      |      |     | SOMGT:0:78 0/1:G    | A | 0 |
|       |    |   |                     | 2.5                 |      |      |     | SOMGT:0:21 0/1:T    | C | 0 |
|       |    |   |                     |                     |      |      |     | SOMGT:0:81 0/1:G    | T | 0 |
|       |    |   |                     | 1,N                 |      |      |     | SOMGT:0:27 0/1:C    | A | 0 |
|       |    |   |                     |                     |      |      |     | SOMGT:0:29 0/1:G    | T | 0 |
|       |    |   |                     |                     |      |      |     | SOMGT:0:63 0/1:G    | T | 0 |
|       |    |   |                     | 0.0:0.9:1.0,D 1.00C | 5.6  | 4.89 |     | SOMGT:0:61 0/1:C    | T | 0 |
|       |    |   |                     | 0.0:0.9:1.0,D 1,D   | 5.2  | 4.06 |     | SOMGT:0:96 0/1:G    | A | 0 |
|       |    |   |                     |                     |      |      |     | SOMGT:0:40 0/1:C    | T | 0 |
|       |    |   |                     |                     |      |      |     | SOMGT:0:45 0/1:G    | A | 0 |
|       |    |   |                     |                     |      |      |     | SOMGT:0:82 0/1:C    | T | 0 |
|       |    |   |                     |                     |      | 0    | 0   | SOMGT:0:9,(0/1:T    | C | 0 |
|       |    |   |                     | 0.0:0.0:0.213 1,N   |      |      |     | SOMGT:0:21 0/1:G    | A | 0 |
|       |    |   |                     | 0.0:0.0:0.437 1,N   |      | 2.41 |     | SOMGT:0:64 0/1:C    | T | 0 |
|       |    |   |                     |                     |      |      |     | SOMGT:0:16 0/1:G    | A | 0 |
|       | ## | 0 | 0.0:0.9:1.0,D 1.00C | 3.6                 | 2.21 |      |     | SOMGT:0:57 0/1:C    | T | 0 |
|       | ## | 0 |                     |                     |      |      |     | SOMGT:0:72 0/1:C    | T | 0 |
|       |    |   |                     |                     |      | 0    |     | SOMGT:0:31 0/1:G    | A | 0 |
| 0.002 | 0  | 0 |                     |                     |      | 3.33 |     | SOMGT:0:17 0/1:G    | A | 0 |
|       |    |   |                     |                     |      | 0    |     | SOMGT:0:13 0/1:C    | T | 0 |
|       |    |   |                     |                     |      |      |     | SOMGT:0:12 0/1:A    | G | 0 |
|       | ## | 0 | 0.0:0.9:1.0,D 1.00C | 4.6                 | 3.93 |      |     | SOMGT:0:11 0/1:G    | A | 0 |
|       |    |   |                     |                     |      |      |     | SOMGT:0:59 0/1:A    | G | 0 |
|       |    |   |                     |                     |      |      |     | SOMGT:0:8,(0/1:C    | T | 0 |
|       |    |   |                     |                     |      | 0.1  | 0.1 | SOMGT:0:38 0/1:G    | A | 0 |
|       |    |   |                     |                     |      | 0    | 0   | SOMGT:0:58 0/1:C    | A | 0 |
|       |    |   |                     |                     |      | 0    | 0.1 | SOMGT:0:9,(0/1:G    | A | 0 |
|       |    |   |                     |                     |      | 0    | 0.1 | SOMGT:0:8,(0/1:C    | A | 0 |
|       |    |   |                     |                     |      | 0.2  | 0.4 | SOMGT:0:14 0/1:C    | T | 0 |
|       |    |   |                     |                     |      |      |     | SOMGT:0:78 0/1:G    | A | 0 |
|       |    |   |                     |                     |      |      |     | SOMGT:0:11 0/1:C    | A | 0 |
|       |    |   |                     |                     |      |      |     | SOMGT:0:70 0/1:G    | C | 0 |
|       |    |   |                     |                     |      |      |     | SOMGT:0:9,(0/1:C    | T | 0 |
|       |    |   |                     |                     |      | 0.3  | 0.6 | SOMGT:0:9,(0/1:T    | C | 0 |
|       |    |   |                     |                     |      | 0.3  | 0.5 | SOMGT:0:9,(0/1:C    | T | 0 |
|       |    |   |                     |                     |      | 0.1  | 0.2 | DB;SOMGT:0:33 0/1:G | C | 0 |
|       |    |   |                     |                     |      |      |     | SOMGT:0:30 0/1:C    | T | 0 |
|       |    |   |                     |                     |      |      |     | SOMGT:0:31 0/1:T    | C | 0 |
|       |    |   |                     |                     |      |      |     | SOMGT:0:33 0/1:A    | G | 0 |
|       |    |   |                     |                     |      | 2.5  |     | SOMGT:0:24 0/1:C    | G | 0 |
|       |    |   |                     |                     |      |      |     | SOMGT:0:75 0/1:A    | G | 0 |
|       |    |   |                     |                     |      |      |     | SOMGT:0:18 0/1:C    | T | 0 |
|       |    |   |                     | 0.5:0.1:0.245 1,N   |      |      |     | SOMGT:0:11 0/1:C    | T | 0 |
|       |    |   |                     |                     |      |      |     | SOMGT:0:14 0/1:A    | G | 0 |
|       |    |   |                     |                     |      |      |     | SOMGT:0:21 0/1:G    | T | 0 |
|       |    |   |                     |                     |      |      |     | SOMGT:0:37 0/1:C    | T | 0 |
|       |    |   |                     |                     |      | 3.8  |     | SOMGT:0:28 0/1:C    | T | 0 |
|       | ## | 0 |                     |                     |      | 1.49 |     | SOMGT:0:22 0/1:A    | G | 0 |
|       |    |   |                     |                     |      | 0    |     | SOMGT:0:47 0/1:C    | T | 0 |
|       |    |   |                     |                     |      |      |     | SOMGT:0:12 0/1:T    | G | 0 |
|       |    |   |                     |                     |      |      |     | SOMGT:0:10 0/1:C    | T | 0 |
|       |    |   |                     |                     |      | 1.71 |     | SOMGT:0:22 0/1:C    | T | 0 |
|       | ## | 0 |                     |                     |      |      |     | SOMGT:0:51 0/1:G    | A | 0 |
|       | ## | 0 | 0.0:0.9:1.0,D 1.00C | 4.8                 | 4.76 |      |     | SOMGT:0:30 0/1:C    | T | 0 |

|       |    |     |     |       |       |       |      |                        |                    |   |   |
|-------|----|-----|-----|-------|-------|-------|------|------------------------|--------------------|---|---|
| .     | .  | .   | .   | .     | .     | .     | .    | SOMGT:0:28 0/1:4 C     | A                  | 0 |   |
| .     | .  | .   | .   | .     | .     | .     | .    | SOMGT:0:93 0/1:7 C     | A                  | 0 |   |
| .     | .  | .   | .   | .     | .     | .     | .    | SOMGT:0:42 0/1:7 T     | C                  | 0 |   |
| .     | .  | 0.0 | 0.9 | 1.0,D | 1.000 | 5     | 2.65 | SOMGT:0:36 0/1:6 G     | A                  | 0 |   |
| .     | .  | 0.0 | 0.9 | 1.0,D | 1.000 | 5.3   | 3.79 | SOMGT:0:44 0/1:8 T     | C                  | 0 |   |
| .     | .  | .   | .   | .     | .     | .     | .    | SOMGT:0:29 0/1:3 C     | T                  | 0 |   |
| .     | .  | .   | .   | .     | .     | .     | .    | SOMGT:0:16 0/1:3 T     | C                  | 0 |   |
| .     | .  | .   | .   | .     | .     | .     | .    | SOMGT:0:34 0/1:4 G     | A                  | 0 |   |
| .     | .  | 0.0 | 0.9 | 1.0,D | 1.000 | 5.3   | 4.28 | SOMGT:0:73 0/1:7 G     | A                  | 0 |   |
| .     | .  | .   | .   | .     | .     | .     | .    | SOMGT:0:23 0/1:4 T     | C                  | 0 |   |
| .     | .  | .   | .   | .     | .     | .     | .    | SOMGT:0:12 0/1:7 C     | A                  | 0 |   |
| .     | .  | .   | .   | .     | .     | .     | .    | SOMGT:0:53 0/1:8 G     | A                  | 0 |   |
| .     | ## | 0.0 | 0.9 | 1.0,D | 0.997 | 2     | 2.81 | SOMGT:0:10 0/1:7 C     | T                  | 0 |   |
| .     | .  | .   | .   | .     | .     | .     | .    | SOMGT:0:18 0/1:4 C     | T                  | 0 |   |
| .     | ## | 0   | 0.0 | 0.9   | 1.0,D | 1,D   | 5    | 4.64                   | SOMGT:0:72 0/1:9 G | A | 0 |
| .     | ## | 0   | .   | .     | .     | .     | .    | SOMGT:0:14 0/1:2 C     | T                  | 0 |   |
| 2E-04 | .  | .   | .   | .     | .     | .     | .    | SOMGT:0:35 0/1:9 C     | T                  | 0 |   |
| .     | .  | .   | .   | .     | .     | .     | .    | SOMGT:0:15 0/1:3 G     | A                  | 0 |   |
| .     | .  | .   | .   | .     | .     | .     | .    | SOMGT:0:20 0/1:3 G     | A                  | 0 |   |
| .     | ## | 0   | 0.0 | 0.9   | 1.0,D | 0.992 | 5.5  | 3.51                   | SOMGT:0:90 0/1:7 G | A | 0 |
| .     | .  | 0.4 | 0.3 | 0.837 | 0.999 | 4.5   | 1.36 | SOMGT:0:36 0/1:7 G     | A                  | 0 |   |
| .     | .  | .   | .   | .     | .     | 0.1   | 0.3  | SOMGT:0:17 0/1:3 A     | G                  | 0 |   |
| .     | .  | .   | .   | .     | .     | 0     | 0.1  | SOMGT:0:10 0/1:7 C     | G                  | 0 |   |
| .     | .  | .   | .   | .     | .     | .     | .    | SOMGT:0:23 0/1:2 A     | G                  | 0 |   |
| .     | .  | .   | .   | .     | .     | 0.2   | 0.3  | DB;SOMGT:0:19 0/1:3 C  | A                  | 0 |   |
| .     | .  | .   | .   | .     | .     | .     | .    | SOMGT:0:49 0/1:9 G     | A                  | 0 |   |
| .     | ## | 0   | .   | .     | .     | .     | .    | SOMGT:0:16 0/1:2 G     | A                  | 0 |   |
| .     | .  | .   | .   | .     | .     | 2.51  | 0    | SOMGT:0:8,0/1:7 T      | A                  | 0 |   |
| .     | 0  | 0   | .   | .     | .     | .     | .    | SOMGT:0:59 0/1:6 G     | A                  | 0 |   |
| .     | .  | .   | .   | .     | .     | 0     | 0    | SOMGT:0:61 0/1:9 C     | A                  | 0 |   |
| .     | .  | .   | .   | .     | .     | .     | .    | SOMGT:0:24 0/1:3 G     | A                  | 0 |   |
| .     | ## | 0   | .   | .     | .     | .     | .    | SOMGT:0:14 0/1:2 G     | A                  | 0 |   |
| .     | ## | 0   | .   | .     | .     | .     | .    | SOMGT:0:12 0/1:7 G     | A                  | 0 |   |
| .     | .  | .   | .   | .     | .     | .     | .    | SOMGT:0:11 0/1:7 G     | A                  | 0 |   |
| ##### | ## | 0   | .   | .     | .     | .     | .    | SOMGT:0:52 0/1:6 G     | A                  | 0 |   |
| ##### | ## | 0   | .   | .     | .     | .     | .    | SOMGT:0:59 0/1:7 C     | T                  | 0 |   |
| .     | .  | 0.0 | 0.2 | 0.745 | 1,N   | 1     | 1.99 | SOMGT:0:12 0/1:2 G     | T                  | 0 |   |
| .     | .  | 0.0 | 0.0 | 0.009 | 0.766 | 3.3   | 2.16 | SOMGT:0:11 0/1:7 C     | T                  | 0 |   |
| .     | .  | .   | .   | .     | .     | 2.3   | .    | SOMGT:0:44 0/1:7 G     | T                  | 0 |   |
| .     | ## | 0   | 0.2 | 0.0   | 0.127 | 0.995 | 3.7  | 1.77                   | SOMGT:0:10 0/1:7 G | A | 0 |
| .     | .  | .   | .   | .     | .     | .     | .    | SOMGT:0:44 0/1:8 C     | T                  | 0 |   |
| .     | .  | .   | .   | .     | .     | .     | .    | SOMGT:0:22 0/1:3 C     | T                  | 0 |   |
| .     | .  | .   | .   | .     | .     | .     | .    | SOMGT:0:45 0/1:7 C     | T                  | 0 |   |
| .     | .  | .   | .   | .     | .     | .     | .    | SOMGT:0:50 0/1:8 T     | C                  | 0 |   |
| .     | .  | .   | .   | .     | .     | .     | .    | SOMGT:0:20 0/1:4 G     | A                  | 0 |   |
| .     | 0  | 0   | .   | .     | .     | .     | .    | SOMGT:0:15 0/1:3 G     | A                  | 0 |   |
| .     | .  | .   | .   | .     | .     | 2.2   | .    | SOMGT:0:27 0/1:4 C     | T                  | 0 |   |
| .     | .  | .   | .   | .     | .     | 4     | 2.97 | SOMGT:0:81 0/1:7 G     | A                  | 0 |   |
| .     | .  | .   | .   | .     | .     | .     | .    | SOMGT:0:16 0/1:2 T     | C                  | 0 |   |
| .     | .  | .   | .   | .     | .     | .     | .    | SOMGT:0:18 0/1:4 T     | C                  | 0 |   |
| .     | .  | .   | .   | .     | .     | .     | .    | SOMGT:0:49 0/1:8 G     | A                  | 0 |   |
| ##### | ## | 0   | .   | .     | .     | .     | .    | SOMGT:0:72 0/1:7 C     | T                  | 0 |   |
| .     | .  | .   | .   | .     | .     | .     | .    | SOMGT:0:42 0/1:6 C     | T                  | 0 |   |
| ##### | 0  | 0   | 0.2 | 0.2   | 0.863 | 1,N   | 2.01 | 0 0 SOMGT:0:66 0/1:7 G | A                  | 0 |   |

|       |    |               |         |       |       |       |                       |   |   |
|-------|----|---------------|---------|-------|-------|-------|-----------------------|---|---|
| .     | .  | .             | .       | .     | .     | .     | SOMGT:0:47 0/1:C      | T | 0 |
| .     | .  | .             | .       | 1,A   | 4.5   | 7.78. | SOMGT:0:53 0/1:G      | A | 0 |
| .     | .  | .             | .       | .     | .     | .     | SOMGT:0:10 0/1:C      | A | 0 |
| ##    | 0  | .             | .       | .     | .     | .     | SOMGT:0:75 0/1:A      | G | 0 |
| .     | .  | 0.0,1.0,1.0,D | 1,D     | 4.9   | 4.46. | .     | SOMGT:0:17 0/1:G      | A | 0 |
| .     | .  | 0.0,0.7,0.99  | 0.997   | 4.4   | 3.54. | .     | SOMGT:0:14 0/1:G      | A | 0 |
| .     | .  | .             | .       | .     | .     | .     | SOMGT:0:82 0/1:C      | T | 0 |
| .     | .  | .             | .       | .     | .     | .     | SOMGT:0:26 0/1:C      | T | 0 |
| .     | .  | .             | .       | .     | .     | 0     | SOMGT:0:49 0/1:C      | T | 0 |
| .     | .  | 0.2,0.9,0.99  | 0.996   | 5.6   | 4.50. | .     | SOMGT:0:54 0/1:C      | T | 0 |
| ##    | 0  | 0.4,0.0,0.03  | 1,N     | .     | .     | .     | SOMGT:0:12 0/1:G      | A | 0 |
| .     | .  | 0.0,0.7,0.94  | 1,D     | 5.4   | 5.33. | .     | SOMGT:0:86 0/1:C      | T | 0 |
| ##    | 0  | 0.0,0.9,1.0,  | D 1,D   | 4.4   | 3.92. | .     | SOMGT:0:69 0/1:C      | T | 0 |
| .     | .  | .             | .       | .     | .     | .     | SOMGT:0:26 0/1:C      | A | 0 |
| .     | .  | .             | .       | .     | .     | .     | SOMGT:0:36 0/1:G      | A | 0 |
| ##    | 0  | .             | .       | .     | .     | .     | SOMGT:0:82 0/1:C      | T | 0 |
| .     | .  | .             | .       | .     | .     | .     | SOMGT:0:22 0/1:G      | A | 0 |
| .     | .  | .             | .       | .     | .     | 0     | 0 SOMGT:0:13 0/1:C    | T | 0 |
| .     | .  | .             | .       | .     | .     | 0     | 0 DB;SOMGT:0:37 0/1:C | T | 0 |
| .     | .  | .             | .       | 2.2   | 1.77. | .     | SOMGT:0:26 0/1:C      | T | 0 |
| .     | .  | .             | .       | 5.5   | 2.28. | .     | SOMGT:0:30 0/1:A      | G | 0 |
| .     | .  | .             | .       | .     | .     | .     | SOMGT:0:16 0/1:T      | C | 0 |
| .     | .  | .             | .       | .     | .     | .     | SOMGT:0:65 0/1:G      | A | 0 |
| .     | .  | 0.0,0.2,0.93  | 1,N     | 2.7   | 1.74. | .     | SOMGT:0:12 0/1:G      | A | 0 |
| .     | .  | .             | .       | .     | .     | .     | SOMGT:0:75 0/1:C      | A | 0 |
| .     | .  | .             | .       | .     | .     | .     | SOMGT:0:15 0/1:C      | A | 0 |
| .     | .  | .             | .       | .     | .     | .     | SOMGT:0:52 0/1:G      | A | 0 |
| .     | .  | .             | .       | .     | .     | .     | SOMGT:0:8,0/1:G       | A | 0 |
| .     | .  | .             | .       | 3.7   | .     | .     | SOMGT:0:21 0/1:G      | A | 0 |
| ##### | ## | 0             | .       | .     | .     | .     | SOMGT:0:54 0/1:C      | T | 0 |
| .     | .  | .             | .       | .     | .     | .     | SOMGT:0:53 0/1:G      | A | 0 |
| .     | .  | 0.0,0.9,1.0,  | D 1,000 | 4.8   | 4.78. | .     | SOMGT:0:96 0/1:C      | T | 0 |
| .     | .  | .             | .       | .     | .     | .     | SOMGT:0:20 0/1:C      | T | 0 |
| .     | .  | .             | .       | .     | .     | .     | SOMGT:0:19 0/1:A      | G | 0 |
| .     | .  | .             | .       | .     | .     | .     | SOMGT:0:22 0/1:T      | G | 0 |
| .     | .  | .             | .       | .     | .     | .     | SOMGT:0:50 0/1:A      | C | 0 |
| .     | .  | .             | .       | .     | .     | .     | SOMGT:0:70 0/1:T      | C | 0 |
| .     | .  | .             | .       | .     | .     | .     | SOMGT:0:51 0/1:T      | C | 0 |
| .     | .  | .             | .       | 2.1   | .     | .     | SOMGT:0:37 0/1:G      | T | 0 |
| .     | .  | .             | .       | .     | .     | .     | SOMGT:0:17 0/1:C      | T | 0 |
| .     | .  | 0.0,1.0,1.0,  | D 1,D   | 5.6   | 4.37. | .     | SOMGT:0:11 0/1:C      | T | 0 |
| .     | .  | .             | .       | 1.86. | .     | .     | SOMGT:0:71 0/1:G      | A | 0 |
| ##    | 0  | 0.0,0.4,0.91  | 1,N     | 2.58. | .     | .     | SOMGT:0:61 0/1:C      | T | 0 |
| .     | .  | .             | .       | .     | .     | .     | SOMGT:0:71 0/1:C      | T | 0 |
| .     | .  | .             | .       | .     | .     | .     | SOMGT:0:94 0/1:T      | C | 0 |
| .     | .  | .             | .       | .     | .     | .     | SOMGT:0:15 0/1:C      | T | 0 |
| .     | .  | .             | .       | .     | .     | .     | SOMGT:0:58 0/1:T      | A | 0 |
| .     | .  | .             | .       | .     | .     | .     | SOMGT:0:64 0/1:C      | A | 0 |
| .     | .  | .             | .       | 3     | 4.36. | .     | SOMGT:0:12 0/1:G      | A | 0 |
| .     | .  | .             | .       | .     | .     | .     | SOMGT:0:43 0/1:T      | C | 0 |
| .     | .  | .             | .       | .     | .     | .     | SOMGT:0:29 0/1:A      | C | 0 |
| .     | .  | .             | .       | .     | .     | .     | SOMGT:0:45 0/1:A      | C | 0 |
| .     | .  | .             | .       | 5.2   | 3.80. | .     | SOMGT:0:30 0/1:A      | C | 0 |
| .     | .  | .             | .       | 1.99. | .     | .     | SOMGT:0:12 0/1:G      | A | 0 |

|       |    |     |     |       |       |     |                  |                  |                  |   |   |
|-------|----|-----|-----|-------|-------|-----|------------------|------------------|------------------|---|---|
| .     | .  | .   | .   | .     | .     | .   | SOMGT:0:42 0/1:G | A                | 0                |   |   |
| .     | .  | .   | .   | .     | .     | .   | SOMGT:0:99 0/1:C | T                | 0                |   |   |
| .     | .  | .   | .   | .     | .     | .   | SOMGT:0:86 0/1:G | T                | 0                |   |   |
| .     | 0  | 0   | .   | .     | .     | .   | SOMGT:0:21 0/1:C | T                | 0                |   |   |
| ##### | ## | 0   | 0.3 | 0.0   | 0.507 | 1,D | 3.3              | 3.27             | SOMGT:0:14 0/1:G | A | 0 |
| .     | ## | 0   | 0.1 | 0.8   | 0.999 | 1,D | 4                | 4.03             | SOMGT:0:12 0/1:C | T | 0 |
| .     | .  | .   | .   | .     | .     | .   | 2.7              | 1.77             | SOMGT:0:14 0/1:G | T | 0 |
| .     | ## | 0   | .   | .     | .     | .   | .                | .                | SOMGT:0:38 0/1:G | A | 0 |
| .     | .  | .   | .   | .     | .     | .   | 4.2              | 1.57             | SOMGT:0:89 0/1:C | T | 0 |
| .     | .  | 0.0 | 0.1 | 0.703 | 0.962 | 2.4 | 1.63             | SOMGT:0:63 0/1:G | T                | 0 |   |
| .     | .  | .   | .   | .     | .     | .   | .                | .                | SOMGT:0:14 0/1:G | A | 0 |
| .     | ## | 0   | 0.3 | 0.0   | 0.585 | 1,D | 3.6              | 1.69             | SOMGT:0:11 0/1:C | A | 0 |
| .     | .  | .   | .   | .     | .     | .   | .                | .                | SOMGT:0:42 0/1:G | T | 0 |
| .     | .  | 0.3 | 0.0 | 0.357 | 1,D   | 4.6 | 3.14             | SOMGT:0:74 0/1:A | T                | 0 |   |
| .     | .  | 0.0 | 0.1 | 0.206 | 0.984 | 5.8 | 1.66             | SOMGT:0:10 0/1:G | C                | 0 |   |
| .     | .  | .   | .   | .     | .     | .   | .                | .                | SOMGT:0:14 0/1:T | T | 0 |
| .     | .  | .   | .   | .     | .     | 1,D | 5.1              | 3.90             | SOMGT:0:11 0/1:C | A | 0 |
| .     | .  | .   | .   | .     | .     | .   | .                | .                | SOMGT:0:94 0/1:G | G | 0 |
| .     | .  | .   | .   | .     | .     | .   | 2.4              | .                | SOMGT:0:22 0/1:A | G | 0 |
| .     | .  | .   | .   | .     | .     | .   | .                | .                | SOMGT:0:8,(0/1:T | G | 0 |
| .     | .  | .   | .   | .     | .     | .   | .                | .                | SOMGT:0:11 0/1:G | C | 0 |
| .     | .  | .   | .   | .     | .     | .   | .                | .                | SOMGT:0:29 0/1:A | G | 0 |
| .     | .  | .   | .   | .     | .     | .   | .                | .                | DB;GT:0:30 0/1:C | A | 0 |
| .     | .  | .   | .   | .     | .     | .   | .                | .                | SOMGT:0:8,(0/1:A | G | 0 |
| .     | .  | .   | .   | .     | .     | .   | .                | .                | SOMGT:0:10 0/1:T | G | 0 |
| .     | .  | .   | .   | .     | .     | .   | .                | .                | SOMGT:0:10 0/1:T | C | 0 |
| .     | .  | .   | .   | .     | .     | .   | .                | .                | SOMGT:0:10 0/1:T | G | 0 |
| .     | .  | .   | .   | .     | .     | .   | .                | .                | SOMGT:0:8,(0/1:A | C | 0 |
| .     | .  | .   | .   | .     | .     | .   | 0                | .                | SOMGT:0:17 0/1:G | A | 0 |
| .     | .  | .   | .   | .     | .     | .   | .                | .                | SOMGT:0:9,(0/1:C | A | 0 |
| .     | .  | .   | .   | .     | .     | .   | .                | .                | SOMGT:0:14 0/1:C | A | 0 |
| .     | .  | .   | .   | .     | .     | .   | .                | .                | SOMGT:0:29 0/1:G | A | 0 |
| .     | .  | .   | .   | .     | .     | .   | .                | .                | SOMGT:0:60 0/1:G | C | 0 |
| .     | ## | 0   | 0.0 | 0.9   | 0.998 | 1,D | 4.6              | 3.56             | SOMGT:0:96 0/1:C | T | 0 |
| .     | .  | 0.0 | 0.8 | 0.999 | 0.986 | 2.9 | 1.95             | SOMGT:0:11 0/1:C | T                | 0 |   |
| .     | 0  | 0   | .   | .     | .     | .   | .                | .                | SOMGT:0:16 0/1:G | A | 0 |
| .     | .  | .   | .   | .     | .     | .   | .                | .                | SOMGT:0:99 0/1:C | A | 0 |
| .     | .  | 0.0 | 0.0 | 0.288 | 1.000 | 3.8 | 1.91             | SOMGT:0:93 0/1:G | A                | 0 |   |
| .     | .  | 0.1 | 0.9 | 1.0,D | 1,D   | 4.5 | 4.69             | SOMGT:0:30 0/1:C | T                | 0 |   |
| .     | .  | .   | .   | .     | .     | .   | .                | .                | SOMGT:0:41 0/1:A | G | 0 |
| .     | .  | .   | .   | .     | .     | .   | .                | .                | SOMGT:0:77 0/1:G | A | 0 |
| .     | .  | .   | .   | .     | .     | .   | .                | .                | SOMGT:0:11 0/1:G | T | 0 |
| .     | .  | .   | .   | .     | .     | 1,A | 6.1              | 9.05             | SOMGT:0:79 0/1:C | A | 0 |
| .     | .  | .   | .   | .     | .     | .   | 2.8              | .                | SOMGT:0:8,(0/1:A | G | 0 |
| .     | .  | 0.0 | 0.5 | 0.963 | 0.999 | 5   | 4.16             | SOMGT:0:40 0/1:C | T                | 0 |   |
| .     | .  | 0.1 | 0.9 | 1.0,D | 1.000 | 4.7 | 2.63             | SOMGT:0:66 0/1:G | A                | 0 |   |
| .     | .  | 0.0 | 0.9 | 0.996 | 0.999 | 5.2 | 3.37             | SOMGT:0:23 0/1:C | A                | 0 |   |
| .     | .  | .   | .   | .     | .     | .   | 1.55             | .                | SOMGT:0:24 0/1:C | T | 0 |
| .     | .  | .   | .   | .     | .     | .   | .                | .                | SOMGT:0:12 0/1:T | C | 0 |
| .     | .  | .   | .   | .     | .     | .   | .                | .                | SOMGT:0:8,(0/1:G | A | 0 |
| .     | .  | 0.0 | 0.9 | 1.0,D | 1,D   | 3.9 | 4.36             | SOMGT:0:85 0/1:G | A                | 0 |   |
| .     | .  | 0.0 | 0.0 | 0.032 | 1.000 | .   | .                | .                | SOMGT:0:85 0/1:C | A | 0 |
| .     | .  | .   | .   | .     | .     | .   | .                | .                | SOMGT:0:21 0/1:C | T | 0 |

|       |    |   |     |     |       |       |      |       |                      |   |   |
|-------|----|---|-----|-----|-------|-------|------|-------|----------------------|---|---|
| 0.02  | 0  | 0 |     |     |       |       |      |       | SOMGT:0:82 0/1: C    | T | 0 |
|       |    |   |     |     | 3.4   |       |      |       | SOMGT:0:99 0/1: G    | A | 0 |
|       |    |   |     |     |       |       |      |       | SOMGT:0:50 0/1: C    | A | 0 |
|       |    |   |     |     |       |       |      |       | SOMGT:0:15 0/1: T    | C | 0 |
|       |    |   |     |     | 2.4   | 2.35  |      |       | SOMGT:0:12 0/1: C    | T | 0 |
|       |    |   |     |     |       |       |      |       | SOMGT:0:41 0/1: C    | T | 0 |
|       |    |   |     |     |       |       |      |       | SOMGT:0:10 0/1: G    | A | 0 |
| ##### | 0  | 0 | 1.0 | 0.0 | 0.075 | 0.926 | 2.9  | 0     | SOMGT:0:64 0/1: C    | T | 0 |
|       |    |   |     |     |       |       |      |       | SOMGT:0:9, (0/1: A   | G | 0 |
|       |    |   |     |     |       |       |      |       | SOMGT:0:13 0/1: C    | A | 0 |
|       |    |   |     |     |       |       |      |       | SOMGT:0:57 0/1: C    | T | 0 |
|       |    |   |     |     |       |       |      |       | SOMGT:0:32 0/1: G    | T | 0 |
|       |    |   |     |     |       |       | 1.46 |       | SOMGT:0:29 0/1: A    | G | 0 |
|       |    |   |     |     |       |       |      |       | SOMGT:0:16 0/1: G    | A | 0 |
|       |    |   |     |     |       |       |      |       | SOMGT:0:69 0/1: C    | T | 0 |
|       | 0  | 0 |     |     |       |       |      | 0 0   | SOMGT:0:69 0/1: C    | T | 0 |
|       |    |   | 0.0 | 0.6 | 0.955 | 1.000 | 5.3  | 2.25  | SOMGT:0:61 0/1: G    | A | 0 |
|       | ## | 0 |     |     |       |       |      |       | SOMGT:0:10 0/1: C    | T | 0 |
|       |    |   | 0.0 | 0.8 | 0.992 | 1.000 | 4.8  | 4.69  | SOMGT:0:93 0/1: G    | T | 0 |
|       |    |   |     |     |       |       |      |       | SOMGT:0:36 0/1: G    | A | 0 |
|       | ## | 0 |     |     |       |       |      |       | SOMGT:0:75 0/1: G    | A | 0 |
|       |    |   |     |     |       |       |      | 0     | SOMGT:0:46 0/1: G    | A | 0 |
|       |    |   |     |     |       |       | 1.53 |       | SOMGT:0:15 0/1: G    | A | 0 |
|       |    |   |     |     |       |       | 4    | 1.79  | SOMGT:0:86 0/1: G    | A | 0 |
|       |    |   |     |     |       |       |      | 0     | SOMGT:0:14 0/1: C    | T | 0 |
|       |    |   |     |     |       |       | 5.5  |       | SOMGT:0:18 0/1: G    | A | 0 |
|       | ## | 0 | 0.1 | 0.1 | 0.6   | P 1,D | 4.7  | 3.31  | SOMGT:0:56 0/1: C    | T | 0 |
|       |    |   |     |     |       |       |      |       | SOMGT:0:36 0/1: C    | T | 0 |
|       |    |   |     |     |       |       | 1.48 |       | SOMGT:0:27 0/1: G    | A | 0 |
|       |    |   |     |     |       |       |      |       | SOMGT:0:37 0/1: G    | A | 0 |
|       |    |   | 0.0 | 0.9 | 1.0   | D 1,D | 4.2  | 2.12  | SOMGT:0:52 0/1: A    | G | 0 |
|       |    |   |     |     |       |       |      |       | SOMGT:0:9, (0/1: C   | T | 0 |
|       |    |   |     |     |       |       |      |       | SOMGT:0:34 0/1: C    | T | 0 |
|       |    |   |     |     |       |       |      |       | SOMGT:0:27 0/1: A    | T | 0 |
|       |    |   |     |     |       |       |      |       | SOMGT:0:19 0/1: T    | C | 0 |
|       |    |   |     |     |       |       |      |       | SOMGT:0/1: (0:41 C   | T | 0 |
|       |    |   |     |     |       |       |      | 0 0.1 | SOMGT:0/1: (0:9, (C  | T | 0 |
|       |    |   |     |     |       |       |      | 0 0   | SOMGT:0/1: (0:17 A   | C | 0 |
|       |    |   |     |     |       |       |      | 0 0   | SOMGT:0/1: (0:9, (T  | C | 0 |
|       |    |   |     |     |       | 1,D   | 5.6  | 4.73  | SOMGT:0/1: (0:18 C   | A | 0 |
|       |    |   |     |     |       |       |      | 0 0   | SOMGT:0/1: (0:13 G   | C | 0 |
|       |    |   |     |     |       |       |      | 0 0.1 | SOMGT:0/1: (0:8, (G  | T | 0 |
|       |    |   |     |     |       |       |      | 0     | SOMGT:0/1: (0:11 T   | C | 0 |
|       |    |   |     |     |       |       |      |       | SOMGT:0/1: (0:82 G   | T | 0 |
|       |    |   |     |     |       |       |      |       | SOMGT:0/1: (0:28 G   | T | 0 |
|       |    |   |     |     |       |       |      | 0 0   | SOMGT:0/1: (0:13 G   | C | 0 |
| ##### | 0  | 0 |     |     |       |       | 1.33 | 0 0   | DB; (GT:0/1: (0:49 G | A | 0 |
|       | ## | 0 |     |     |       |       |      |       | SOMGT:0/1: (0:25 C   | T | 0 |
|       |    |   | 0.0 | 1.0 | 1.0   | D 1,D | 5.8  | 4.66  | SOMGT:0/1: (0:21 C   | A | 0 |
|       |    |   |     |     |       |       |      |       | SOMGT:0/1: (0:18 C   | T | 0 |
|       |    |   |     |     |       |       |      | 0 0   | DB; (GT:0/1: (0:35 A | G | 0 |
|       |    |   |     |     |       |       |      | 0 0   | SOMGT:0/1: (0:13 G   | T | 0 |
|       |    |   |     |     |       |       | 3.4  |       | SOMGT:0/1: (0:58 T   | C | 0 |
|       |    |   |     |     |       |       |      |       | SOMGT:0/1: (0:9, (A  | G | 0 |



|       |    |   |     |      |       |       |      |      |                  |                  |               |   |   |
|-------|----|---|-----|------|-------|-------|------|------|------------------|------------------|---------------|---|---|
|       |    |   |     |      |       |       |      |      | SOMGT:0/1:0:24 T | C                | 0             |   |   |
|       |    |   |     |      |       |       |      |      | SOMGT:0/1:0:15 C | T                | 0             |   |   |
|       |    |   |     | 1,D  | 5.2   | 4.11  |      |      | SOMGT:0/1:0:25 C | T                | 0             |   |   |
| 2E-04 | ## | 0 | 0.5 | 0.0  | 0.007 | 1,N   |      |      | SOMGT:0/1:0:20 G | A                | 0             |   |   |
|       | ## | 0 |     |      | 2.6   | 2.20  |      |      | SOMGT:0/1:0:51 G | A                | 0             |   |   |
|       |    |   |     |      |       | 1.24  |      |      | SOMGT:0/1:0:20 C | T                | 0             |   |   |
|       |    |   |     |      |       |       | 0    | 0    | SOMGT:0/1:0:9,(G | T                | 0             |   |   |
|       |    |   |     |      |       |       |      |      | SOMGT:0/1:0:12 G | T                | 0             |   |   |
|       | 0  | 0 |     |      |       |       |      |      | SOMGT:0/1:0:38 T | C                | 0             |   |   |
|       |    |   | 0.5 | 0.0  | 0.001 | 1,N   | 2.8  |      | SOMGT:0/1:0:30 A | C                | 0             |   |   |
|       | ## | 0 | 0.0 | 0.0  | 0.05  | 1,000 | 5.5  | 3.45 | SOMGT:0/1:0:24 G | A                | 0             |   |   |
|       |    |   |     |      |       |       | 1.63 |      | SOMGT:0/1:0:8,(A | T                | 0             |   |   |
|       | ## | 0 |     |      |       |       |      | 0    | SOMGT:0/1:0:12 G | A                | 0             |   |   |
|       | ## | 0 | 0.0 | 0.3  | 0.97  | 1,N   | 1.80 | 0    | 0                | SOMGT:0/1:0:44 C | T             | 0 |   |
|       |    |   |     |      |       |       |      |      | SOMGT:0/1:0:29 G | A                | 0             |   |   |
|       |    |   |     |      |       |       | 0.1  | 0.2  | DB;S             | GT:0/1:0:35 C    | T             | 0 |   |
|       | 0  | 0 | 0.0 | 0.01 | 1,N   |       | 0.2  | 0.2  | SOMGT:0/1:0:40 T | G                | 0             |   |   |
|       | 0  | 0 |     |      |       |       | 0.3  | 0.2  | SOMGT:0/1:0:42 A | G                | 0             |   |   |
|       |    |   |     |      |       |       |      |      | SOMGT:0/1:0:99 C | A                | 0             |   |   |
|       |    |   |     |      |       |       | 0.1  | 0.1  | SOMGT:0/1:0:11 A | G                | 0             |   |   |
|       |    |   |     |      |       |       | 1.81 |      | SOMGT:0/1:0:9,(C | A                | 0             |   |   |
|       |    |   |     |      |       |       |      |      | SOMGT:0/1:0:51 C | T                | 0             |   |   |
|       | 0  | 0 |     |      |       |       |      |      | SOMGT:0/1:0:9,(T | C                | 0             |   |   |
|       |    |   |     |      |       |       | 0    | 0.4  | SOMGT:0/1:0:13 A | C                | 0             |   |   |
|       | 0  | 0 |     |      | 1,A   | 4.7   | 8.33 | 0.1  | 0                | DB;S             | GT:0/1:0:11 G | A | 0 |
|       |    |   |     |      |       | 4.4   | 1.68 |      |                  | SOMGT:0/1:0:18 C | T             | 0 |   |
|       |    |   |     |      |       | 3.6   |      |      |                  | SOMGT:0/1:0:22 C | G             | 0 |   |
|       |    |   |     |      |       |       |      |      |                  | SOMGT:0/1:0:26 A | T             | 0 |   |
|       |    |   |     |      |       |       |      | 0    |                  | SOMGT:0/1:0:39 A | G             | 0 |   |
|       | ## | 0 |     |      |       |       |      | 0    |                  | SOMGT:0/1:0:26 G | A             | 0 |   |
|       | 0  | 0 |     |      |       |       | 0.1  | 0.1  | SOMGT:0/1:0:12 A | G                | 0             |   |   |
|       |    |   |     |      |       |       |      |      |                  | SOMGT:0/1:0:12 G | A             | 0 |   |
|       |    |   |     |      |       |       | 0.3  | 0.4  | DB;S             | GT:0/1:0:33 C    | T             | 0 |   |
|       |    |   |     |      |       | 3.1   | 1.70 |      |                  | SOMGT:0/1:0:26 G | T             | 0 |   |
|       |    |   |     |      |       | 2.4   | 2.84 |      |                  | SOMGT:0/1:0:84 G | C             | 0 |   |
| ##### | ## | 0 |     |      |       |       |      |      |                  | SOMGT:0/1:0:14 C | T             | 0 |   |
|       |    |   |     |      |       | 2.6   | 2.07 |      |                  | SOMGT:0/1:0:16 G | A             | 0 |   |
|       |    |   |     |      |       |       |      | 0    | 0.1              | SOMGT:0/1:0:9,(G | C             | 0 |   |
|       |    |   |     |      |       |       |      | 0    | 0.2              | SOMGT:0/1:0:11 G | C             | 0 |   |
|       |    |   |     |      |       |       |      |      |                  | SOMGT:0/1:0:56 T | G             | 0 |   |
|       |    |   |     |      | 1,D   | 1.30  |      |      |                  | SOMGT:0/1:0:21 G | A             | 0 |   |
|       |    |   | 0.1 | 0.0  | 0.00  | 1,000 | 4.4  | 1.76 |                  | SOMGT:0/1:0:89 G | C             | 0 |   |
|       |    |   |     |      |       |       |      |      |                  | SOMGT:0/1:0:19 C | G             | 0 |   |
|       |    |   |     |      |       | 4     |      |      |                  | SOMGT:0/1:0:85 G | C             | 0 |   |
|       |    |   | 0.0 | 0.9  | 0.99  | 1,D   | 5.7  | 5.56 |                  | SOMGT:0/1:0:20 C | T             | 0 |   |
|       |    |   |     |      |       |       |      |      |                  | SOMGT:0/1:0:30 G | C             | 0 |   |
|       |    |   | 0.1 | 0.3  | 0.73  | 0.98  | 5    | 2.81 |                  | SOMGT:0/1:0:26 C | T             | 0 |   |
|       |    |   |     |      |       |       |      |      |                  | SOMGT:0/1:0:9,(G | A             | 0 |   |
|       | ## | 0 | 0.0 | 0.9  | 1.0   | D     | 1,D  | 4.8  | 5.21             | SOMGT:0/1:0:10 G | A             | 0 |   |
|       |    |   |     |      |       |       | 2.5  | 1.40 |                  | SOMGT:0/1:0:35 C | G             | 0 |   |
|       |    |   |     |      |       |       |      |      |                  | SOMGT:0/1:0:23 G | A             | 0 |   |
|       |    |   |     |      |       |       | 1.24 |      |                  | SOMGT:0/1:0:12 C | T             | 0 |   |
|       |    |   |     |      |       |       | 2.5  |      |                  | SOMGT:0/1:0:23 C | T             | 0 |   |
|       | ## | 0 | 0.0 | 0.9  | 1.0   | D     | 1,D  | 5.6  | 4.51             | SOMGT:0/1:0:17 G | A             | 0 |   |

|       |    |     |     |       |       |       |      |      |                       |                     |   |   |
|-------|----|-----|-----|-------|-------|-------|------|------|-----------------------|---------------------|---|---|
|       |    |     |     |       |       |       |      |      | SOMGT:0/1:0:52 T      | C                   | 0 |   |
|       |    | 0.0 | 0.7 | 0.986 | 1.000 | 5.9   | 5.01 |      | SOMGT:0/1:0:31 C      | T                   | 0 |   |
|       |    | 0.0 | 0.9 | 0.999 | 1,D   | 4.9   | 3.98 |      | SOMGT:0/1:0:47 C      | G                   | 0 |   |
|       |    |     |     |       |       |       |      |      | SOMGT:0/1:0:12 C      | T                   | 0 |   |
|       |    |     |     |       |       |       |      |      | SOMGT:0/1:0:37 G      | C                   | 0 |   |
|       |    |     |     |       |       | 3     | 1.75 |      | SOMGT:0/1:0:22 G      | T                   | 0 |   |
|       |    | 0.0 |     | 0.997 | 2.2   |       |      |      | SOMGT:0/1:0:17 G      | C                   | 0 |   |
| ##    | 0  | 0.0 | 0.4 | 0.962 | 1,D   | 5.2   | 3.79 |      | SOMGT:0/1:0:23 G      | A                   | 0 |   |
|       |    |     |     |       |       |       |      |      | SOMGT:0/1:0:31 G      | C                   | 0 |   |
|       |    |     |     |       |       |       |      |      | SOMGT:0/1:0:36 A      | G                   | 0 |   |
|       |    | 0.0 | 0.9 | 0.994 | 1,D   | 3.2   | 3.19 |      | SOMGT:0/1:0:54 G      | T                   | 0 |   |
|       |    | 0.4 | 0.0 | 0.026 | 1,D   | 4.2   |      |      | SOMGT:0/1:0:54 G      | A                   | 0 |   |
|       |    |     |     |       |       |       |      |      | SOMGT:0/1:0:10 G      | C                   | 0 |   |
| ##    | 0  |     |     | 0.999 | 2.3   | 8.58  |      |      | SOMGT:0/1:0:61 G      | A                   | 0 |   |
|       |    |     |     |       |       |       |      |      | SOMGT:0/1:0:55 G      | C                   | 0 |   |
| ##    | 0  | 0.0 | 0.9 | 0.991 | 1,D   | 5.8   | 5.70 |      | DB;SOMGT:0/1:0:25 G   | A                   | 0 |   |
|       |    | 0.0 | 0.0 | 0.002 | 0.812 | 3.23  |      |      | SOMGT:0/1:0:32 A      | C                   | 0 |   |
|       |    |     |     |       |       |       |      |      | SOMGT:0/1:0:33 C      | T                   | 0 |   |
|       |    | 0.0 | 0.3 | 0.817 | 1.000 | 5.6   | 2.56 |      | SOMGT:0/1:0:39 G      | A                   | 0 |   |
|       |    |     |     |       |       |       |      |      | SOMGT:0/1:0:19 C      | T                   | 0 |   |
|       |    | 0.0 | 0.7 | 0.941 | 1,D   | 5.3   | 5.17 |      | SOMGT:0/1:0:20 C      | T                   | 0 |   |
|       |    | 0.0 | 0.9 | 1.0,D | 1,D   | 6.2   | 4.90 |      | SOMGT:0/1:0:17 C      | G                   | 0 |   |
|       |    |     |     |       |       |       |      |      | SOMGT:0/1:0:13 C      | T                   | 0 |   |
|       |    |     |     |       |       |       |      | 0    | SOMGT:0/1:0:14 G      | C                   | 0 |   |
|       |    | 0.0 | 0.9 | 1.0,D | 1.000 | 5.6   | 4.57 |      | SOMGT:0/1:0:24 G      | C                   | 0 |   |
|       |    | 0.1 | 0.0 | 0.0,B | 1,N   |       |      |      | SOMGT:0/1:0:36 C      | T                   | 0 |   |
| 0     | 0  | 0.1 | 0.1 | 0.768 | 0.632 | 3.9   | 1.85 | 0    | 0 DB;SOMGT:0/1:0:37 C | T                   | 0 |   |
|       |    | 0.0 | 0.3 | 0.974 | 1.000 | 4.5   | 2.94 |      | SOMGT:0/1:0:77 C      | G                   | 0 |   |
|       |    |     |     |       |       |       |      |      | SOMGT:0/1:0:30 G      | A                   | 0 |   |
|       |    | 0.6 | 0.0 | 0.056 | 1,D   | 4.2   | 2.60 |      | SOMGT:0/1:0:14 G      | A                   | 0 |   |
|       |    |     |     |       |       |       |      |      | SOMGT:0/1:0:8,(C      | A                   | 0 |   |
|       |    | 0.3 | 0.0 | 0.001 | 1,N   |       |      |      | SOMGT:0/1:0:21 A      | G                   | 0 |   |
|       |    |     |     |       |       |       |      |      | SOMGT:0/1:0:14 G      | A                   | 0 |   |
|       |    |     |     |       |       | 0.2   | 0.3  |      | DB;SOMGT:0/1:0:39 C   | T                   | 0 |   |
|       |    |     |     |       |       | 0     | 0    |      | SOMGT:0/1:0:8,(A      | G                   | 0 |   |
|       |    | 0.0 | 0.9 | 1.0,D | 0.996 | 5.2   | 2.21 |      | SOMGT:0/1:0:17 C      | G                   | 0 |   |
|       |    | 0.0 | 0.0 | 0.037 | 1.000 | 2.5   |      |      | SOMGT:0/1:0:30 C      | T                   | 0 |   |
|       |    |     |     |       |       |       |      |      | SOMGT:0/1:0:12 C      | T                   | 0 |   |
|       |    |     |     |       |       | 3.7   | 2.89 |      | SOMGT:0/1:0:72 C      | G                   | 0 |   |
|       |    |     |     |       |       |       |      |      | SOMGT:0/1:0:27 G      | C                   | 0 |   |
|       |    |     |     |       |       |       |      | 0    | SOMGT:0/1:0:29 C      | A                   | 0 |   |
|       |    |     |     |       |       |       |      |      | SOMGT:0/1:0:45 C      | A                   | 0 |   |
|       |    |     |     |       |       | 4.8   | 1.97 |      | SOMGT:0/1:0:54 C      | T                   | 0 |   |
| ##    | 0  |     |     |       |       |       |      |      | SOMGT:0/1:0:44 G      | C                   | 0 |   |
|       |    |     |     |       |       |       |      |      | SOMGT:0/1:0:15 G      | A                   | 0 |   |
|       |    | 0.0 | 0.1 | 0.202 | 1,D   | 6.2   | 3.33 |      | SOMGT:0/1:0:18 A      | T                   | 0 |   |
|       |    |     |     |       |       | 4     | 1.65 |      | SOMGT:0/1:0:30 G      | A                   | 0 |   |
|       |    | 0.2 | 0.0 | 0.004 | 1,N   | 1.51  |      |      | SOMGT:0/1:0:39 C      | T                   | 0 |   |
| ##### | ## | 0   | 0.0 | 0.6   | 0.992 | 0.988 | 3.8  | 1.87 | 0                     | SOMGT:0/1:0:12 C    | T | 0 |
|       | 0  | 0   |     |       |       |       |      | 0.1  | 0                     | DB;SOMGT:0/1:0:43 C | T | 0 |
|       |    |     |     |       |       |       |      |      | SOMGT:0/1:0:22 G      | A                   | 0 |   |
|       |    |     |     |       |       | 4.9   | 1.37 |      | SOMGT:0/1:0:12 G      | A                   | 0 |   |
|       |    |     |     |       |       |       |      |      | SOMGT:0/1:0:13 C      | T                   | 0 |   |
|       |    |     |     |       |       |       |      |      | SOMGT:0/1:0:69 T      | A                   | 0 |   |

|       |      |                      |           |         |                      |   |   |
|-------|------|----------------------|-----------|---------|----------------------|---|---|
|       |      | 0.0(0.9(0.9991,D     | 6 2.81.   |         | SOMGT:/0/1:0:12 C    | T | 0 |
|       |      |                      |           |         | SOMGT:/0/1:0:81 G    | A | 0 |
|       | 1 1. |                      |           | 0.1 0.5 | SOMGT:/0/1:0:44 C    | G | 0 |
|       |      |                      |           |         | SOMGT:/0/1:0:87 G    | C | 0 |
|       |      |                      |           |         | SOMGT:/0/1:0:11 C    | T | 0 |
|       |      |                      | 1.76.     |         | SOMGT:/0/1:0:33 C    | G | 0 |
|       |      |                      |           |         | SOMGT:/0/1:0:13 C    | T | 0 |
|       |      |                      |           |         | SOMGT:/0/1:0:16 G    | A | 0 |
|       |      |                      | 3.9 1.41. |         | SOMGT:/0/1:0:43 G    | A | 0 |
|       |      |                      |           |         | SOMGT:/0/1:0:51 G    | A | 0 |
|       |      |                      |           |         | SOMGT:/0/1:0:35 G    | A | 0 |
|       |      |                      |           | 0.1 0   | SOMGT:/0/1:0:15 T    | C | 0 |
|       |      | 0.0(0.9(1.0,D1,D     | 6.1 3.62. |         | SOMGT:/0/1:0:44 A    | G | 0 |
|       |      | 0.0(0.4(0.8491.000   | 2.8 .     |         | SOMGT:/0/1:0:24 C    | G | 0 |
|       |      |                      |           | 0 0     | SOMGT:/0/1:0:15 T    | A | 0 |
|       |      |                      |           |         | SOMGT:/0/1:0:16 C    | T | 0 |
|       |      |                      | 2.5 .     |         | SOMGT:/0/1:0:29 G    | A | 0 |
|       |      | 0.0(1.0(1.0,D1,D     | 5 5.03.   |         | DB;SOMGT:/0/1:0:52 G | A | 0 |
|       |      |                      |           |         | SOMGT:/0/1:0:14 T    | A | 0 |
| ##### | ##   | 0 . 0.9(0.9971,D     | 6 5.36.   |         | SOMGT:/0/1:0:42 G    | A | 0 |
| 0.003 | 0 0  | 0.0(0.6(0.9971.000   | 5.1 3.59. |         | DB;SOMGT:/0/1:0:10 C | T | 0 |
|       |      | 0.0(0.3(0.3560.946   | 3.2 1.48. |         | SOMGT:/0/1:0:46 C    | G | 0 |
|       |      | 0.1(0.0(0.0640.996   | 5.9 1.36. |         | SOMGT:/0/1:0:31 C    | T | 0 |
|       |      |                      |           |         | SOMGT:/0/1:0:28 C    | G | 0 |
|       |      | 0.1(0.4(0.8811.000   | 5.7 2.53. |         | SOMGT:/0/1:0:37 C    | G | 0 |
|       |      | 0.0(0.27(11,N        | 2.37.     |         | SOMGT:/0/1:0:49 G    | A | 0 |
| 2E-04 | 0 0  |                      |           |         | SOMGT:/0/1:0:27 C    | T | 0 |
|       |      |                      |           |         | SOMGT:/0/1:0:14 C    | T | 0 |
|       |      |                      |           |         | SOMGT:/0/1:0:8,(C    | T | 0 |
|       |      |                      | 4.1 .     |         | SOMGT:/0/1:0:43 G    | A | 0 |
|       | ##   | 0 0.0(1.0(1.0,D1,D   | 4.6 4.45. |         | DB;SOMGT:/0/1:0:81 C | T | 0 |
|       |      |                      |           |         | SOMGT:/0/1:0:35 G    | A | 0 |
|       | 0 0  |                      |           | 0 .     | DB;SOMGT:/0/1:0:58 G | A | 0 |
|       |      |                      |           | 0 0     | SOMGT:/0/1:0:9,(C    | G | 0 |
|       | 0 0  |                      |           | 0.4 0.3 | SOMGT:/0/1:0:33 T    | C | 0 |
|       |      |                      |           | 0 0.1   | SOMGT:/0/1:0:17 G    | C | 0 |
|       |      |                      |           |         | SOMGT:/0/1:0:58 G    | A | 0 |
|       | 0 0  |                      |           | 0 0     | SOMGT:/0/1:0:49 C    | T | 0 |
|       |      | 0.0(0.8(0.9921,N     | 1.98.     |         | SOMGT:/0/1:0:81 G    | A | 0 |
|       |      |                      |           |         | SOMGT:/0/1:0:60 G    | C | 0 |
|       |      |                      | 4.6 .     |         | SOMGT:/0/1:0:14 G    | A | 0 |
|       |      |                      |           |         | SOMGT:/0/1:0:47 G    | A | 0 |
|       |      |                      |           |         | SOMGT:/0/1:0:76 C    | T | 0 |
|       |      | 0.0(0.9(1.0,D1,D     | 5.4 3.69. |         | SOMGT:/0/1:0:10 C    | T | 0 |
|       |      |                      |           |         | SOMGT:/0/1:0:18 G    | A | 0 |
|       | ##   | 0 0.0(0.5(0.9871.000 | 5.8 5.62. |         | SOMGT:/0/1:0:50 C    | T | 0 |
|       |      |                      |           |         | SOMGT:/0/1:0:44 C    | T | 0 |
|       |      | 0.0(0.5(0.8991.000   | 2.6 2.10. |         | SOMGT:/0/1:0:90 G    | C | 0 |
|       | ##   | 0 . 0.0(0.0011,N     |           |         | SOMGT:/0/1:0:24 C    | T | 0 |
| 4E-04 | 0 0  |                      |           |         | SOMGT:/0/1:0:17 G    | A | 0 |
|       |      |                      | 3 .       |         | SOMGT:/0/1:0:20 G    | A | 0 |
|       | 0 0  |                      |           |         | SOMGT:/0/1:0:19 C    | T | 0 |
|       |      |                      |           | 0 .     | SOMGT:/0/1:0:25 C    | T | 0 |
|       |      |                      | 2.32.     |         | SOMGT:/0/1:0:32 G    | A | 0 |

|       |    |     |     |      |       |       |       |                |      |                |                |                |             |   |   |   |
|-------|----|-----|-----|------|-------|-------|-------|----------------|------|----------------|----------------|----------------|-------------|---|---|---|
| 0     | 0  |     |     |      |       | 0     | 0     | SOMGT:0/1:0:14 | C    | T              | 0              |                |             |   |   |   |
|       |    |     |     |      |       |       |       | SOMGT:0/1:0:22 | G    | C              | 0              |                |             |   |   |   |
|       |    |     |     | 2.8  |       |       |       | SOMGT:0/1:0:24 | C    | G              | 0              |                |             |   |   |   |
|       |    |     |     |      |       |       |       | SOMGT:0/1:0:13 | G    | A              | 0              |                |             |   |   |   |
|       |    | 0.0 | 0.9 | 0.99 | 1.00  | 3.1   | 3.49  | SOMGT:0/1:0:57 | G    | T              | 0              |                |             |   |   |   |
|       |    | 0.0 | 0.1 | 0.43 | 1,1,N |       |       | SOMGT:0/1:0:65 | C    | T              | 0              |                |             |   |   |   |
|       |    |     |     |      |       |       |       | SOMGT:0/1:0:32 | C    | T              | 0              |                |             |   |   |   |
|       |    |     |     | 1,D  |       | 4     | 6.43  | SOMGT:0/1:0:37 | C    | G              | 0              |                |             |   |   |   |
|       |    |     |     |      |       |       | 1.59  | SOMGT:0/1:0:62 | G    | A              | 0              |                |             |   |   |   |
|       |    |     |     |      |       |       |       | SOMGT:0/1:0:76 | G    | C              | 0              |                |             |   |   |   |
|       |    |     |     |      |       |       |       | SOMGT:0/1:0:11 | C    | G              | 0              |                |             |   |   |   |
|       |    |     |     |      |       |       |       | SOMGT:0/1:0:48 | G    | C              | 0              |                |             |   |   |   |
|       |    |     |     |      |       |       | 5.9   | SOMGT:0/1:0:11 | G    | A              | 0              |                |             |   |   |   |
| ##### | ## | 0   | 0.4 | 0.0  | 0.005 | 0.984 | 1.70  | 0              | 0    | SOMGT:0/1:0:44 | G              | A              | 0           |   |   |   |
|       |    |     |     |      |       |       |       |                |      | SOMGT:0/1:0:17 | G              | C              | 0           |   |   |   |
|       |    |     |     |      |       |       |       |                |      | SOMGT:0/1:0:8, | (T             | C              | 0           |   |   |   |
|       |    |     |     |      |       |       |       | 0              | 0    | DB;S           | GT:0/1:0:28    | T              | C           | 0 |   |   |
|       |    |     |     | 1,A  |       | 5.5   | 10.7  |                |      | SOMGT:0/1:0:27 | C              | G              | 0           |   |   |   |
|       |    |     |     |      |       |       |       |                |      | DB;S           | GT:0/1:0:20    | G              | C           | 0 |   |   |
|       |    |     | 0.3 | 0.1  | 0.48  | 1,N   | 2.74  |                |      | SOMGT:0/1:0:15 | C              | T              | 0           |   |   |   |
|       |    |     |     |      |       |       | 4.4   |                |      | SOMGT:0/1:0:24 | C              | A              | 0           |   |   |   |
|       |    | 0   | 0   | 0.0  | 0.9   | 0.37  | 1.00  | 3.5            | 2.43 | SOMGT:0/1:0:42 | G              | A              | 0           |   |   |   |
|       |    |     |     | 0.0  | 0.7   | 0.99  | 0.97  | 2.7            | 2.50 | SOMGT:0/1:0:16 | G              | A              | 0           |   |   |   |
|       |    |     |     |      |       |       |       |                |      | SOMGT:0/1:0:9, | (T             | A              | 0           |   |   |   |
|       |    |     |     | 0.3  | 0.9   | 0.99  | 1,D   | 4.9            | 4.26 | SOMGT:0/1:0:34 | G              | A              | 0           |   |   |   |
|       |    |     |     | 0.0  | 0.0   | 0.07  | 1,1,N |                |      | SOMGT:0/1:0:15 | G              | C              | 0           |   |   |   |
|       |    |     |     |      |       |       |       |                |      | SOMGT:0/1:0:10 | T              | A              | 0           |   |   |   |
|       |    |     |     |      |       |       |       |                |      | SOMGT:0/1:0:15 | T              | A              | 0           |   |   |   |
|       |    |     |     |      |       |       |       |                |      | SOMGT:0/1:0:16 | G              | C              | 0           |   |   |   |
|       |    |     |     |      |       |       |       |                |      | SOMGT:0/1:0:52 | C              | T              | 0           |   |   |   |
|       |    |     |     |      |       |       |       |                |      | SOMGT:0/1:0:45 | T              | C              | 0           |   |   |   |
|       |    | 0   | 0   |      |       |       |       | 0              | 0    | DB;S           | GT:0/1:0:37    | T              | C           | 0 |   |   |
|       |    |     |     | 1.0  | 0.0   | 0.04  | 1,D   | 4.9            |      | SOMGT:0/1:0:48 | C              | A              | 0           |   |   |   |
|       |    |     |     |      |       |       |       |                |      | SOMGT:0/1:0:93 | C              | T              | 0           |   |   |   |
|       |    |     |     | 0.4  | 0.0   | 0.007 | 0.98  | 4.1            | 1.44 | SOMGT:0/1:0:31 | G              | A              | 0           |   |   |   |
|       |    |     |     |      |       |       |       | 1.47           | 0    | 0.1            | SOMGT:0/1:0:9, | (T             | C           | 0 |   |   |
|       |    |     |     |      |       |       |       |                | 0.2  | 0.2            | SOMGT:0/1:0:13 | G              | T           | 0 |   |   |
|       |    |     |     |      |       |       |       | 1.67           |      |                | SOMGT:0/1:0:49 | T              | A           | 0 |   |   |
|       |    |     |     | 0.5  | 0.0   | 0.001 | 1,N   |                |      | SOMGT:0/1:0:72 | G              | A              | 0           |   |   |   |
|       |    |     |     |      |       |       |       | 3.3            |      |                | SOMGT:0/1:0:18 | C              | G           | 0 |   |   |
| ##### | ## | 0   |     |      |       |       |       |                |      | SOMGT:0/1:0:85 | C              | T              | 0           |   |   |   |
|       |    | 0   | 0   |      |       |       |       |                |      | SOMGT:0/1:0:61 | T              | A              | 0           |   |   |   |
|       |    |     |     |      |       |       |       |                |      | SOMGT:0/1:0:27 | C              | T              | 0           |   |   |   |
| 2E-04 | ## | 0   |     |      |       |       |       |                |      | SOMGT:0/1:0:12 | C              | T              | 0           |   |   |   |
|       |    | 0   | 0   |      |       |       |       |                |      | SOMGT:0/1:0:10 | G              | A              | 0           |   |   |   |
|       |    |     |     |      |       |       |       |                |      | 0              | 0.1            | SOMGT:0/1:0:9, | (C          | T | 0 |   |
|       |    |     |     |      |       |       |       |                |      |                | SOMGT:0/1:0:22 | G              | T           | 0 |   |   |
|       |    |     |     |      |       |       | 4.8   |                |      | SOMGT:0/1:0:40 | C              | T              | 0           |   |   |   |
| ##### | ## | 0   | 0.4 | 0.0  | 0.002 | 1,N   | 2     | 1.66           |      | SOMGT:0/1:0:64 | C              | T              | 0           |   |   |   |
|       |    |     |     |      |       |       |       |                |      | 0              | 0              | DB;S           | GT:0/1:0:72 | C | T | 0 |
|       |    |     |     |      |       |       |       |                | 0.4  | 0.5            | DB;S           | GT:0/1:0:52    | C           | G | 0 |   |
|       |    |     |     |      |       |       |       |                | 0.4  | 0.4            | DB;S           | GT:0/1:0:40    | G           | T | 0 |   |
|       |    | ##  | 0   |      |       |       |       |                |      | SOMGT:0/1:0:12 | C              | T              | 0           |   |   |   |
|       |    | ##  | 0   | 0.0  | 0.3   | 0.84  | 1,D   | 2.7            | 2.81 |                | SOMGT:0/1:0:68 | G              | A           | 0 |   |   |

|   |       |     |     |       |         |       |          |                      |   |   |
|---|-------|-----|-----|-------|---------|-------|----------|----------------------|---|---|
| . | .     | .   | .   | .     | .       | .     | .        | SOMGT:/0/1:20:33 C   | T | 0 |
| . | .     | .   | .   | .     | .       | .     | .        | DB;S GT:/0/1:20:33 C | T | 0 |
| . | .     | .   | .   | .     | .       | .     | .        | SOMGT:/0/1:20:24 G   | T | 0 |
| . | .     | .   | .   | .     | .       | .     | .        | SOMGT:/0/1:20:74 T   | A | 0 |
| . | ##    | 0   | .   | .     | .       | .     | .        | SOMGT:/0/1:20:46 C   | T | 0 |
| . | .     | 0.0 | 0.1 | 0.557 | .       | 1.91  | .        | SOMGT:/0/1:20:44 G   | A | 0 |
| . | .     | 1.0 | 0.0 | 0.0   | B 1.00C | 4     | .        | SOMGT:/0/1:20:23 C   | A | 0 |
| . | .     | .   | .   | .     | .       | .     | .        | SOMGT:/0/1:20:23 T   | C | 0 |
| . | ##    | 0   | .   | .     | .       | .     | .        | SOMGT:/0/1:20:31 C   | T | 0 |
| . | .     | .   | .   | .     | .       | .     | .        | SOMGT:/0/1:20:21 G   | T | 0 |
| . | ##    | 0   | 0.4 | 0.2   | 0.86C   | 0.99C | 4.5 2.15 | SOMGT:/0/1:20:81 G   | A | 0 |
| . | .     | .   | .   | .     | .       | .     | 3.9 2.86 | SOMGT:/0/1:20:24 T   | A | 0 |
| . | ##    | 0   | .   | .     | .       | .     | .        | SOMGT:/0/1:20:27 G   | A | 0 |
| . | .     | .   | .   | .     | .       | .     | 0        | SOMGT:/0/1:20:25 C   | T | 0 |
| . | .     | .   | .   | .     | .       | .     | 0        | DB;S GT:/0/1:20:19 T | A | 0 |
| . | .     | .   | .   | .     | .       | .     | .        | SOMGT:/0/1:20:32 G   | A | 0 |
| . | .     | .   | .   | .     | .       | .     | .        | SOMGT:/0/1:20:63 C   | T | 0 |
| . | ##    | 0   | .   | .     | .       | .     | .        | SOMGT:/0/1:20:68 A   | G | 0 |
| . | .     | .   | .   | .     | .       | .     | 1.46     | SOMGT:/0/1:20:11 G   | A | 0 |
| . | .     | 0.0 | 0.6 | 0.887 | 1,D     | 5.8   | 4.15     | DB;S GT:/0/1:20:46 A | G | 0 |
| . | .     | 0.0 | 0.9 | 1.0   | D 1,D   | 4     | 4.84     | SOMGT:/0/1:20:10 G   | A | 0 |
| . | ##    | 0   | .   | .     | .       | .     | 0        | SOMGT:/0/1:20:38 G   | A | 0 |
| . | .     | .   | .   | .     | .       | .     | 1.62     | SOMGT:/0/1:20:10 A   | G | 0 |
| . | .     | .   | .   | .     | .       | .     | 2.4      | SOMGT:/0/1:20:51 T   | C | 0 |
| . | .     | 0.2 | 1.0 | 1.0   | D 1,D   | 4.8   | 3.46     | SOMGT:/0/1:20:55 T   | C | 0 |
| . | .     | .   | .   | .     | .       | .     | .        | SOMGT:/0/1:20:44 G   | A | 0 |
| . | .     | .   | .   | .     | .       | .     | .        | SOMGT:/0/1:20:19 C   | T | 0 |
| . | .     | .   | .   | .     | .       | .     | 0        | SOMGT:/0/1:20:21 A   | G | 0 |
| . | .     | .   | .   | .     | .       | .     | 1.45     | SOMGT:/0/1:20:12 G   | T | 0 |
| . | .     | .   | .   | .     | .       | .     | 5.7 4.01 | SOMGT:/0/1:20:37 C   | A | 0 |
| . | ##    | 0   | .   | .     | .       | .     | .        | SOMGT:/0/1:20:22 G   | A | 0 |
| . | .     | .   | .   | .     | .       | .     | .        | SOMGT:/0/1:20:45 G   | A | 0 |
| . | .     | 0.0 | 1.0 | 1.0   | D 1,D   | 5     | 4.65     | SOMGT:/0/1:20:23 G   | A | 0 |
| . | .     | 0.0 | 0.9 | 0.994 | 1.00C   | 5.1   | 4.41     | SOMGT:/0/1:20:66 C   | A | 0 |
| . | .     | .   | .   | .     | .       | .     | 0 0      | SOMGT:/0/1:20:9,(G   | T | 0 |
| . | .     | .   | .   | .     | .       | .     | 0        | SOMGT:/0/1:20:17 G   | A | 0 |
| . | .     | 0.1 | 0.0 | 0.104 | 1.00C   | 3.8   | .        | SOMGT:/0/1:20:48 T   | C | 0 |
| . | .     | 0.7 | 0.0 | 0.0   | B 0.99C | 2.5   | .        | SOMGT:/0/1:20:26 C   | A | 0 |
| . | .     | .   | .   | .     | .       | .     | .        | SOMGT:/0/1:20:19 C   | T | 0 |
| . | .     | .   | .   | .     | .       | .     | 4.1 1.54 | SOMGT:/0/1:20:82 A   | T | 0 |
| . | .     | .   | .   | .     | .       | .     | 0 0      | SOMGT:/0/1:20:15 G   | C | 0 |
| . | 0     | 0   | .   | .     | .       | .     | .        | SOMGT:/0/1:20:24 G   | A | 0 |
| . | .     | .   | .   | .     | .       | .     | .        | SOMGT:/0/1:20:27 C   | A | 0 |
| . | ##    | 0   | .   | .     | .       | .     | .        | SOMGT:/0/1:20:25 G   | A | 0 |
| . | .     | .   | .   | .     | .       | .     | .        | SOMGT:/0/1:20:46 C   | A | 0 |
| . | .     | .   | .   | .     | .       | .     | .        | SOMGT:/0/1:20:74 T   | C | 0 |
| . | .     | 0.0 | 0.6 | 0.955 | 0.75C   | 4.4   | 3.62     | SOMGT:/0/1:20:13 C   | T | 0 |
| . | .     | .   | .   | .     | .       | .     | 0        | SOMGT:/0/1:20:8,(C   | A | 0 |
| . | ##### | ##  | 0   | .     | .       | .     | .        | SOMGT:/0/1:20:9,(C   | T | 0 |
| . | .     | .   | .   | .     | .       | .     | .        | SOMGT:/0/1:20:12 C   | T | 0 |
| . | 0     | 0   | .   | .     | .       | .     | .        | SOMGT:/0/1:20:26 T   | A | 0 |
| . | .     | .   | .   | .     | .       | .     | 0.2 0.2  | DB;S GT:/0/1:20:38 C | A | 0 |
| . | .     | .   | .   | .     | .       | .     | .        | SOMGT:/0/1:20:45 G   | C | 0 |
| . | .     | .   | .   | .     | .       | .     | 2.11     | SOMGT:/0/1:20:36 G   | A | 0 |

|  |  |       |     |       |       |                     |                     |       |      |      |     |                       |                    |   |   |
|--|--|-------|-----|-------|-------|---------------------|---------------------|-------|------|------|-----|-----------------------|--------------------|---|---|
|  |  |       |     | 0.1   | 0.2   | SOMGT:0/1:0:19 C    | T                   | 0     |      |      |     |                       |                    |   |   |
|  |  |       |     | 0.1   | 0.2   | SOMGT:0/1:0:16 G    | A                   | 0     |      |      |     |                       |                    |   |   |
|  |  | 0.2   | 0.0 | 0.014 | 1,N   | SOMGT:0/1:0:57 G    | A                   | 0     |      |      |     |                       |                    |   |   |
|  |  |       |     | 1,A   | 4.71  | SOMGT:0/1:0:98 G    | T                   | 0     |      |      |     |                       |                    |   |   |
|  |  |       |     |       |       | SOMGT:0/1:0:9,(G    | A                   | 0     |      |      |     |                       |                    |   |   |
|  |  |       |     |       |       | SOMGT:0/1:0:8,(G    | A                   | 0     |      |      |     |                       |                    |   |   |
|  |  |       |     | 0     | 0.1   | SOMGT:0/1:0:9,(T    | A                   | 0     |      |      |     |                       |                    |   |   |
|  |  |       |     | 3.3   |       | SOMGT:0/1:0:24 C    | A                   | 0     |      |      |     |                       |                    |   |   |
|  |  |       |     | 0     | 0.1   | SOMGT:0/1:0:72 C    | G                   | 0     |      |      |     |                       |                    |   |   |
|  |  |       |     |       |       | SOMGT:0/1:0:13 T    | C                   | 0     |      |      |     |                       |                    |   |   |
|  |  |       |     |       |       | SOMGT:0/1:0:31 C    | A                   | 0     |      |      |     |                       |                    |   |   |
|  |  |       |     | 0     | 0     | SOMGT:0/1:0:14 G    | C                   | 0     |      |      |     |                       |                    |   |   |
|  |  |       |     | 0     | 0     | SOMGT:0/1:0:8,(G    | A                   | 0     |      |      |     |                       |                    |   |   |
|  |  |       |     | 5.1   | 4.13  | SOMGT:0/1:0:15 A    | T                   | 0     |      |      |     |                       |                    |   |   |
|  |  |       |     | 1.24  | 0     | 0.1                 | SOMGT:0/1:0:21 T    | C     | 0    |      |     |                       |                    |   |   |
|  |  |       |     | 0     |       | SOMGT:0/1:0:12 T    | A                   | 0     |      |      |     |                       |                    |   |   |
|  |  |       |     | 0.1   | 0     | SOMGT:0/1:0:11 T    | G                   | 0     |      |      |     |                       |                    |   |   |
|  |  |       |     |       |       | SOMGT:0/1:0:9,(T    | C                   | 0     |      |      |     |                       |                    |   |   |
|  |  |       |     | 0.1   | 0.3   | DB;SOMGT:0/1:0:35 G | A                   | 0     |      |      |     |                       |                    |   |   |
|  |  |       |     | 0     |       | SOMGT:0/1:0:17 C    | A                   | 0     |      |      |     |                       |                    |   |   |
|  |  | 0     | 0   |       |       | DB;SOMGT:0/1:0:45 G | A                   | 0     |      |      |     |                       |                    |   |   |
|  |  |       |     |       |       | SOMGT:0/1:0:20 A    | C                   | 0     |      |      |     |                       |                    |   |   |
|  |  | 0     | 0   | 0.8   | 0.997 | 1,N                 | DB;SOMGT:0/1:0:35 G | A     | 0    |      |     |                       |                    |   |   |
|  |  |       |     |       |       | SOMGT:0/1:0:9,(G    | T                   | 0     |      |      |     |                       |                    |   |   |
|  |  |       |     |       |       | SOMGT:0/1:0:9,(G    | A                   | 0     |      |      |     |                       |                    |   |   |
|  |  |       |     |       |       | SOMGT:0:12 0/1:2 A  | C                   | 0     |      |      |     |                       |                    |   |   |
|  |  |       |     | 0     | 0.1   | SOMGT:0:36 0/1:2 G  | T                   | 0     |      |      |     |                       |                    |   |   |
|  |  |       |     | 0     | 0.2   | SOMGT:0:35 0/1:2 C  | T                   | 0     |      |      |     |                       |                    |   |   |
|  |  |       |     | 0     | 0     | SOMGT:0:14 0/1:2 G  | A                   | 0     |      |      |     |                       |                    |   |   |
|  |  |       |     | 3.1   |       | SOMGT:0:12 0/1:2 G  | T                   | 0     |      |      |     |                       |                    |   |   |
|  |  |       |     | 0     | 0     | SOMGT:0:15 0/1:2 T  | C                   | 0     |      |      |     |                       |                    |   |   |
|  |  |       |     | 0     |       | SOMGT:0:17 0/1:2 G  | T                   | 0     |      |      |     |                       |                    |   |   |
|  |  | 0.045 | 0   | 0     | 0.0   | 0.6                 | 0.998               | 1,D   | 3.26 | 0    | 0.1 | SOMGT:0:22 0/1:2 G    | C                  | 0 |   |
|  |  |       |     |       |       |                     |                     |       |      | 0.2  | 0.3 | SOMGT:0:12 0/1:2 A    | C                  | 0 |   |
|  |  |       |     |       |       |                     |                     |       |      | 0.1  | 0.2 | DB;SOMGT:0:32 0/1:2 C | A                  | 0 |   |
|  |  |       |     |       |       |                     |                     |       |      | 0    |     | SOMGT:0:33 0/1:2 A    | G                  | 0 |   |
|  |  |       |     |       |       |                     |                     |       |      | 0    |     | SOMGT:0:8,(0/1:2 G    | C                  | 0 |   |
|  |  |       |     | 0     | 0     | 0.1                 | 0.0                 | 0.239 | 1,N  |      | 0.1 | 0.1                   | SOMGT:0:10 0/1:2 C | T | 0 |
|  |  |       |     |       |       |                     |                     |       |      | 0    | 0.1 | SOMGT:0:19 0/1:2 C    | G                  | 0 |   |
|  |  |       |     |       |       |                     |                     |       |      | 0    |     | SOMGT:0:8,(0/1:2 A    | T                  | 0 |   |
|  |  |       |     |       |       |                     |                     |       |      | 0    |     | DB;SOMGT:0:23 0/1:2 C | A                  | 0 |   |
|  |  |       |     | 0     | 0     |                     |                     |       |      | 1.95 |     | SOMGT:0:42 0/1:2 G    | A                  | 0 |   |
|  |  |       |     |       |       |                     |                     |       |      | 0.1  | 0   | SOMGT:0:37 0/1:2 G    | A                  | 0 |   |
|  |  |       |     |       |       |                     |                     |       |      | 0.2  | 0   | SOMGT:0:36 0/1:2 A    | G                  | 0 |   |
|  |  |       |     | 0     | 0     |                     |                     |       |      | 0.1  | 0.4 | DB;SOMGT:0:26 0/1:2 A | T                  | 0 |   |
|  |  |       |     |       |       |                     |                     |       |      | 0.1  | 0   | SOMGT:0:14 0/1:2 G    | C                  | 0 |   |
|  |  |       |     |       |       |                     |                     |       |      |      |     | SOMGT:0/1:0:48 G      | A                  | 0 |   |
|  |  |       |     |       |       |                     |                     |       |      |      |     | SOMGT:0/1:0:58 A      | G                  | 0 |   |
|  |  |       |     |       |       | 3.5                 |                     |       |      |      |     | SOMGT:0/1:0:9,(C      | A                  | 0 |   |
|  |  |       |     | 0.0   | 0.9   | 1.0,D               | 0.999               | 4.8   | 3.80 |      |     | SOMGT:0/1:0:47 C      | T                  | 0 |   |
|  |  |       |     |       |       |                     |                     |       |      | 0    |     | SOMGT:0/1:0:25 C      | T                  | 0 |   |
|  |  |       |     |       |       |                     |                     |       |      | 0    |     | SOMGT:0/1:0:25 G      | T                  | 0 |   |
|  |  |       |     |       |       | 5.9                 | 3.35                |       |      |      |     | SOMGT:0/1:0:8,(T      | G                  | 0 |   |
|  |  |       |     |       |       |                     |                     |       |      | 0.1  | 0.2 | DB;SOMGT:0/1:0:20 T   | C                  | 0 |   |

|       |   |     |     |       |       |       |       |                |                 |                |                |   |   |   |
|-------|---|-----|-----|-------|-------|-------|-------|----------------|-----------------|----------------|----------------|---|---|---|
| .     | . | .   | .   | .     | .     | 0.1   | 0.3   | SOMGT:0/1:0:21 | G               | A              | 0              |   |   |   |
| .     | . | .   | .   | .     | .     | 0.1   | 0.1   | SOMGT:0/1:0:18 | G               | A              | 0              |   |   |   |
| .     | . | .   | .   | .     | .     |       | 0     | SOMGT:0/1:0:33 | T               | C              | 0              |   |   |   |
| .     | . | .   | .   | .     | .     |       | 0     | SOMGT:0/1:0:38 | G               | C              | 0              |   |   |   |
| .     | . | .   | .   | .     | .     | 1.23  | 0.1   | 0.2            | SOMGT:0/1:0:17  | A              | G              | 0 |   |   |
| .     | . | .   | .   | .     | .     |       | 0     | 0.2            | SOMGT:0/1:0:12  | C              | A              | 0 |   |   |
| .     | . | 1.0 | 0.0 | 0.004 | 1.000 | 3.2   | 1.46  | .              | SOMGT:0/1:0:34  | C              | G              | 0 |   |   |
| .     | . | .   | .   | .     | .     | .     | .     | .              | SOMGT:0/1:0:17  | C              | G              | 0 |   |   |
| .     | . | 0.1 | 0.9 | 0.999 | 1,D   | 5.8   | 4.66  | .              | SOMGT:0/1:0:22  | C              | T              | 0 |   |   |
| .     | . | .   | .   | .     | .     | 5.4   | .     | .              | SOMGT:0/1:0:28  | G              | A              | 0 |   |   |
| .     | . | .   | .   | .     | .     |       | 0     | 0              | SOMGT:0/1:0:22  | C              | T              | 0 |   |   |
| .     | . | .   | .   | .     | .     | .     | .     | .              | SOMGT:0/1:0:50  | G              | C              | 0 |   |   |
| .     | . | ##  | .   | .     | .     | 4.5   | 2.39  | .              | SOMGT:0/1:0:98  | G              | T              | 0 |   |   |
| ##### | 0 | 0   | .   | .     | .     | .     | .     | 0              | SOMGT:0/1:0:28  | G              | A              | 0 |   |   |
| .     | . | 0.2 | 0.0 | 0.001 | 0.994 | 4.8   | 1.44  | .              | SOMGT:0/1:0:13  | A              | C              | 0 |   |   |
| .     | . | ##  | 0   | 0.0   | 0.0   | 0.298 | 0.928 | 4.9            | 2.12            | .              | SOMGT:0/1:0:21 | G | A | 0 |
| .     | . | ##  | 0   | 0.2   | 0.0   | 0.001 | 1,N   | .              | .               | .              | SOMGT:0/1:0:50 | C | T | 0 |
| .     | . | 0   | 0   | .     | .     | 2.7   | .     | .              | DB;S            | GT:0/1:0:29    | A              | G | 0 |   |
| .     | . | .   | .   | .     | .     | .     | .     | .              | SOMGT:0/1:0:12  | C              | G              | 0 |   |   |
| .     | . | .   | .   | .     | .     | 5.6   | 1.28  | .              | SOMGT:0/1:0:10  | G              | A              | 0 |   |   |
| .     | . | 0.4 | 0.8 | 0.991 | 1.000 | 2.5   | 2.33  | .              | SOMGT:0/1:0:58  | G              | A              | 0 |   |   |
| .     | . | .   | .   | .     | .     | 2.8   | .     | .              | SOMGT:0/1:0:12  | T              | G              | 0 |   |   |
| .     | . | .   | .   | .     | .     | .     | .     | .              | SOMGT:0/1:0:11  | C              | G              | 0 |   |   |
| .     | . | .   | .   | .     | .     | .     | .     | .              | SOMGT:0/1:0:20  | T              | C              | 0 |   |   |
| .     | . | ##  | 0   | 0.9   | 1.0,D | 1,D   | 5.7   | 4.68           | .               | SOMGT:0/1:0:43 | G              | A | 0 |   |
| .     | . | .   | .   | .     | .     |       | 0     | 0              | SOMGT:0/1:0:8,( | G              | A              | 0 |   |   |
| .     | . | .   | .   | .     | .     | 0.1   | 0.4   | SOMGT:0/1:0:15 | G               | T              | 0              |   |   |   |
| .     | . | 1.0 | 0.0 | 0.001 | 1,N   | .     | .     | .              | SOMGT:0/1:0:11  | C              | T              | 0 |   |   |
| .     | . | .   | .   | .     | .     | .     | .     | .              | SOMGT:0/1:0:11  | G              | C              | 0 |   |   |
| .     | . | .   | .   | .     | .     | .     | .     | .              | SOMGT:0/1:0:42  | G              | A              | 0 |   |   |
| .     | . | .   | .   | .     | .     | 2.48  | .     | .              | SOMGT:0/1:0:13  | C              | T              | 0 |   |   |
| .     | . | .   | .   | .     | .     | .     | .     | .              | SOMGT:0/1:0:35  | T              | G              | 0 |   |   |
| .     | . | .   | .   | .     | .     | .     | .     | .              | SOMGT:0/1:0:30  | C              | T              | 0 |   |   |
| .     | . | .   | .   | .     | .     | .     | .     | .              | SOMGT:0/1:0:46  | G              | A              | 0 |   |   |
| .     | . | .   | .   | .     | .     | 2.4   | 1.48  | .              | SOMGT:0/1:0:68  | G              | A              | 0 |   |   |
| .     | . | 0.0 | 0.9 | 0.996 | 1.000 | .     | .     | .              | SOMGT:0/1:0:29  | C              | A              | 0 |   |   |
| .     | . | .   | .   | .     | .     | 3.9   | .     | .              | SOMGT:0/1:0:48  | G              | C              | 0 |   |   |
| .     | . | .   | .   | .     | .     | .     | .     | .              | SOMGT:0/1:0:86  | C              | T              | 0 |   |   |
| .     | . | .   | .   | .     | .     | 2.7   | 1.88  | .              | SOMGT:0/1:0:85  | C              | T              | 0 |   |   |
| .     | . | .   | .   | .     | .     | 5.3   | 4.40  | .              | SOMGT:0/1:0:24  | A              | G              | 0 |   |   |
| .     | . | .   | .   | .     | .     | .     | .     | .              | SOMGT:0/1:0:88  | A              | T              | 0 |   |   |
| .     | . | .   | .   | .     | .     | .     | .     | .              | SOMGT:0/1:0:10  | G              | T              | 0 |   |   |
| .     | . | .   | .   | .     | .     | .     | .     | .              | SOMGT:0/1:0:42  | G              | A              | 0 |   |   |
| .     | . | .   | .   | .     | .     |       | 0     | 0              | SOMGT:0/1:0:18  | T              | C              | 0 |   |   |
| .     | . | .   | .   | .     | .     | 1.59  | .     | .              | SOMGT:0/1:0:31  | C              | G              | 0 |   |   |
| .     | . | .   | .   | .     | .     |       | 0.1   | 0              | SOMGT:0/1:0:16  | G              | A              | 0 |   |   |
| .     | . | .   | .   | .     | .     |       | 0.1   | 0              | SOMGT:0/1:0:13  | G              | A              | 0 |   |   |
| .     | . | 0.0 | 0.4 | 0.988 | 1.000 | 3.03  | .     | .              | SOMGT:0/1:0:59  | G              | A              | 0 |   |   |
| .     | . | .   | .   | .     | .     | 3.7   | .     | .              | SOMGT:0/1:0:15  | G              | A              | 0 |   |   |
| .     | . | .   | .   | .     | .     | 1.91  | .     | .              | SOMGT:0/1:0:17  | G              | A              | 0 |   |   |
| .     | . | .   | .   | .     | .     |       | 0     | .              | SOMGT:0/1:0:10  | A              | G              | 0 |   |   |
| .     | . | .   | .   | .     | .     |       | 0     | SOMGT:0/1:0:50 | T               | G              | 0              |   |   |   |
| .     | . | .   | .   | .     | .     | 2.9   | .     | .              | SOMGT:0/1:0:39  | G              | C              | 0 |   |   |
| .     | . | .   | .   | .     | .     | 2.2   | .     | .              | SOMGT:0/1:0:40  | C              | G              | 0 |   |   |

|       |    |   |     |     |        |       |          |       |                     |   |   |
|-------|----|---|-----|-----|--------|-------|----------|-------|---------------------|---|---|
|       |    |   |     |     |        |       |          |       | SOMGT:0/1:0:13 T    | C | 0 |
|       | ## | 0 |     |     |        |       |          |       | SOMGT:0/1:0:38 G    | A | 0 |
|       |    |   |     |     |        |       |          | 0     | SOMGT:0/1:0:15 C    | T | 0 |
|       |    |   |     |     |        |       |          |       | SOMGT:0/1:0:40 A    | T | 0 |
|       |    |   |     | 1,A | 6 7.18 |       |          |       | SOMGT:0/1:0:21 G    | T | 0 |
|       |    |   | 0.5 | 0.0 | 0.002  | 1,N   | 2.9      |       | SOMGT:0/1:0:83 C    | T | 0 |
| 0.001 | 0  | 0 |     |     |        |       |          |       | SOMGT:0/1:0:86 G    | A | 0 |
|       |    |   |     |     |        |       |          |       | SOMGT:0/1:0:23 G    | C | 0 |
|       |    |   | 0.0 | 0.9 | 1.0,D  | 0.966 | 5.7 3.84 |       | SOMGT:0/1:0:77 G    | A | 0 |
|       |    |   |     |     |        |       |          |       | SOMGT:0/1:0:17 G    | A | 0 |
|       | ## | 0 |     |     |        |       |          |       | SOMGT:0/1:0:12 C    | T | 0 |
|       | ## | 0 |     |     |        |       | 2.1      |       | SOMGT:0/1:0:16 G    | A | 0 |
|       |    |   |     |     |        |       |          |       | SOMGT:0/1:0:18 C    | G | 0 |
|       |    |   |     |     |        |       |          |       | SOMGT:0/1:0:11 C    | T | 0 |
|       |    |   |     |     |        |       |          |       | SOMGT:0/1:0:33 G    | A | 0 |
|       |    |   | 0.0 |     |        | 1,N   |          |       | SOMGT:0/1:0:15 G    | A | 0 |
|       |    |   | 0.9 | 0.0 | 0.053  | 1,N   | 1.98     |       | SOMGT:0/1:0:28 G    | C | 0 |
|       |    |   |     |     |        |       |          |       | SOMGT:0/1:0:15 T    | C | 0 |
|       |    |   |     |     |        |       |          | 0     | DB;SOMGT:0/1:0:19 G | T | 0 |
|       |    |   |     |     |        |       |          |       | SOMGT:0/1:0:10 G    | T | 0 |
|       |    |   |     |     |        |       |          |       | SOMGT:0/1:0:56 G    | A | 0 |
|       |    |   |     |     |        |       |          |       | SOMGT:0/1:0:30 G    | A | 0 |
|       | ## | 0 |     |     |        |       |          |       | SOMGT:0/1:0:13 G    | A | 0 |
|       |    |   | 0.0 | 0.9 | 0.999  | 1,D   | 4.7 4.37 |       | SOMGT:0/1:0:42 G    | A | 0 |
|       |    |   |     |     |        |       |          |       | SOMGT:0/1:0:57 A    | T | 0 |
|       |    |   |     |     |        |       |          |       | SOMGT:0/1:0:20 A    | T | 0 |
|       | ## | 0 |     |     |        | 1,A   | 4.1 26.1 |       | SOMGT:0/1:0:15 G    | A | 0 |
|       |    |   |     |     |        |       |          | 0 0   | SOMGT:0/1:0:34 G    | T | 0 |
|       |    |   | 0.1 | 0.8 | 0.975  | 1,D   | 5.5 5.27 |       | SOMGT:0/1:0:24 C    | T | 0 |
|       |    |   |     |     |        |       | 1.25     |       | SOMGT:0/1:0:65 C    | T | 0 |
|       |    |   |     |     |        |       |          |       | SOMGT:0/1:0:17 C    | G | 0 |
|       | ## | 0 | 1.0 | 0.0 | 0.015  | 1,D   | 3.8      |       | SOMGT:0/1:0:39 C    | T | 0 |
|       |    |   |     |     |        |       | 1.47     |       | SOMGT:0/1:0:22 G    | A | 0 |
|       |    |   |     |     |        |       |          | 0.1 0 | DB;SOMGT:0/1:0:41 A | G | 0 |
|       |    |   |     |     |        |       |          |       | SOMGT:0/1:0:10 C    | G | 0 |
|       |    |   |     |     |        |       |          |       | SOMGT:0/1:0:11 C    | T | 0 |
|       |    |   |     |     |        |       |          |       | SOMGT:0/1:0:8,(C    | T | 0 |
|       |    |   |     |     |        |       |          |       | SOMGT:0/1:0:91 C    | T | 0 |
|       |    |   | 0.0 | 0.5 | 0.948  | 1,N   | 4.3 2.60 |       | SOMGT:0/1:0:14 C    | A | 0 |
|       |    |   |     |     |        | 1,D   | 4.2 3.22 |       | SOMGT:0/1:0:11 G    | A | 0 |
|       |    |   |     |     |        |       |          |       | SOMGT:0/1:0:31 G    | A | 0 |
|       | ## | 0 | 0.0 | 0.0 | 0.507  | 1.000 | 3.78     |       | SOMGT:0/1:0:47 G    | A | 0 |
|       |    |   |     |     |        |       |          |       | SOMGT:0/1:0:63 G    | C | 0 |
|       |    |   | 0.1 | 0.0 | 0.0,B  | 1,N   |          |       | SOMGT:0/1:0:46 G    | A | 0 |
|       |    |   | 0.7 | 0.0 | 0.0,B  | 0.713 | 4.8      |       | SOMGT:0/1:0:24 G    | A | 0 |
|       |    |   |     |     |        |       | 3        |       | SOMGT:0/1:0:43 C    | A | 0 |
|       |    |   |     |     |        |       |          | 0     | DB;SOMGT:0/1:0:19 C | T | 0 |
|       |    |   |     |     |        |       |          | 0 0   | DB;SOMGT:0/1:0:22 T | A | 0 |
|       |    |   |     |     |        |       |          | 0.1 0 | DB;SOMGT:0/1:0:35 T | G | 0 |
|       |    |   |     |     |        |       |          | 0     | DB;SOMGT:0/1:0:36 T | G | 0 |
|       |    |   |     |     |        |       |          |       | SOMGT:0/1:0:20 C    | A | 0 |
|       |    |   | 0.4 | 0.0 | 0.001  | 1,N   |          |       | SOMGT:0/1:0:22 T    | C | 0 |
|       |    |   |     |     |        |       |          |       | SOMGT:0/1:0:13 G    | C | 0 |
|       |    |   | 0.8 | 0.0 | 0.049  | 1,D   | 5.8 1.77 |       | SOMGT:0/1:0:25 C    | G | 0 |



|       |    |     |     |            |             |       |                     |                      |   |   |
|-------|----|-----|-----|------------|-------------|-------|---------------------|----------------------|---|---|
|       |    |     |     |            |             |       | SOMGT:0/1:0:40 G    | A                    | 0 |   |
| ##### | ## | 0.0 | 0.4 | 0.8011,D   | 2.66        |       | SOMGT:0/1:0:20 G    | T                    | 0 |   |
|       |    |     |     |            | 2.9         |       | SOMGT:0/1:0:15 C    | G                    | 0 |   |
|       |    |     |     |            |             |       | SOMGT:0/1:0:9,(A    | T                    | 0 |   |
|       |    | 0.0 | 0.0 | 0.0281,D   | 5.3         | 4.86  | SOMGT:0/1:0:17 C    | T                    | 0 |   |
| ##### | ## | 0   |     |            | 1.52        | 0     | SOMGT:0/1:0:15 C    | T                    | 0 |   |
|       |    |     |     |            | 1.30        |       | SOMGT:0/1:0:11 G    | A                    | 0 |   |
|       |    | 1.0 | 0.0 | 0.3581,D   | 5.9         | 2.88  | SOMGT:0/1:0:29 G    | A                    | 0 |   |
|       |    |     |     |            |             |       | SOMGT:0/1:0:66 C    | T                    | 0 |   |
|       |    |     |     |            |             |       | SOMGT:0/1:0:24 G    | C                    | 0 |   |
|       | ## | 0   | 0.1 | 0.0        | 0.0         | B 1,N | SOMGT:0/1:0:30 C    | T                    | 0 |   |
|       |    | 0.0 | 0.0 | 0.6610.979 | 4.4         | 2.60  | SOMGT:0/1:0:18 G    | A                    | 0 |   |
|       |    | 0.0 | 0.7 | 0.9991,N   | 3.3         | 2.81  | SOMGT:0/1:0:49 C    | T                    | 0 |   |
|       |    |     |     |            |             |       | SOMGT:0/1:0:8,(G    | T                    | 0 |   |
|       |    |     |     |            |             |       | SOMGT:0/1:0:9,(T    | G                    | 0 |   |
|       |    |     |     |            | 0.1         | 0.4   | SOMGT:0/1:0:26 C    | A                    | 0 |   |
|       |    |     |     |            | 0           | 0.1   | SOMGT:0/1:0:24 C    | T                    | 0 |   |
|       |    |     |     |            |             |       | SOMGT:0/1:0:86 C    | T                    | 0 |   |
|       |    |     |     |            |             |       | SOMGT:0/1:0:22 C    | G                    | 0 |   |
|       | 0  | 0   |     |            |             |       | SOMGT:0/1:0:55 T    | G                    | 0 |   |
|       |    |     |     |            |             |       | SOMGT:0/1:0:83 G    | T                    | 0 |   |
|       |    |     |     |            | 0.1         | 0.1   | SOMGT:0/1:0:33 G    | C                    | 0 |   |
|       | 0  | 0   | 0.6 | 0.0        | 0.0140.644  | 4.5   | SOMGT:0/1:0:41 G    | A                    | 0 |   |
|       |    |     |     |            |             |       | SOMGT:0/1:0:17 T    | A                    | 0 |   |
|       | 0  | 0   |     |            |             | 0.1   | 0.1                 | SOMGT:0/1:0:8,(A     | G | 0 |
|       |    |     |     |            |             |       | SOMGT:0/1:0:31 C    | T                    | 0 |   |
|       |    |     |     |            | 0           |       | SOMGT:0/1:0:14 A    | G                    | 0 |   |
|       |    | 0.0 | 0.7 | 0.9851,D   | 5.7         | 4.01  | SOMGT:0/1:0:58 G    | A                    | 0 |   |
|       |    |     |     |            | 0           | 0     | SOMGT:0/1:0:26 T    | C                    | 0 |   |
|       |    | 0.0 | 0.9 | 0.9971,D   | 4.6         | 1.92  | SOMGT:0/1:0:93 C    | A                    | 0 |   |
|       |    | 0.0 | 0.9 | 0.9951,D   | 5.4         | 4.16  | SOMGT:0/1:0:15 A    | G                    | 0 |   |
|       |    |     |     |            | 0           | 0     | SOMGT:0/1:0:21 T    | C                    | 0 |   |
|       |    |     |     |            | 0           | 0.1   | SOMGT:0/1:0:17 C    | G                    | 0 |   |
|       | 0  | 0   |     |            | 0           | 0.1   | DB;SOMGT:0/1:0:60 T | G                    | 0 |   |
|       | 0  | 0   |     |            | 1.48        |       | SOMGT:0/1:0:51 C    | G                    | 0 |   |
|       |    |     |     |            | 0           | 0     | SOMGT:0/1:0:26 T    | A                    | 0 |   |
|       |    |     |     |            |             |       | SOMGT:0/1:0:47 C    | T                    | 0 |   |
|       |    |     |     |            | 0           |       | SOMGT:0/1:0:44 C    | T                    | 0 |   |
|       |    |     |     |            |             |       | SOMGT:0/1:0:17 C    | G                    | 0 |   |
| ##### | ## | 0   | 0.4 | 0.0        | 0.0021,N    |       | SOMGT:0/1:0:87 T    | C                    | 0 |   |
|       |    | 0.0 | 0.9 | 0.9990.982 | 5.5         | 4.27  | SOMGT:0/1:0:42 C    | A                    | 0 |   |
|       | ## | 0   | 0.0 | 0.9        | 1.0,D 0.980 | 5.6   | 5.56                | SOMGT:0/1:0:80 C     | T | 0 |
|       |    |     |     |            |             |       | SOMGT:0/1:0:39 G    | T                    | 0 |   |
|       |    | 0.0 | 0.0 | 0.0341,D   | 5.3         | 3.35  | SOMGT:0/1:0:16 T    | C                    | 0 |   |
|       |    |     |     |            | 0.1         | 0.1   | SOMGT:0/1:0:42 A    | G                    | 0 |   |
|       |    |     |     |            |             |       | SOMGT:0/1:0:13 C    | G                    | 0 |   |
|       | 0  | 0   | 0.1 | 0.0        | 0.1080.889  | 4.6   | 3.30                | 0 0 SOMGT:0/1:0:10 C | T | 0 |
|       |    |     |     |            |             |       | SOMGT:0/1:0:22 C    | G                    | 0 |   |
|       |    |     |     |            |             |       | SOMGT:0/1:0:10 G    | A                    | 0 |   |
|       |    | 0.0 | 0.5 | 0.8960.994 | 4.8         | 2.62  | SOMGT:0/1:0:19 C    | A                    | 0 |   |
|       |    |     |     |            |             |       | SOMGT:0/1:0:15 G    | T                    | 0 |   |
| 2E-04 | ## | 0   |     |            | 3.4         |       | SOMGT:0/1:0:48 G    | A                    | 0 |   |
|       |    |     |     |            |             |       | SOMGT:0/1:0:38 T    | C                    | 0 |   |
|       |    |     |     |            | 0.2         | 0.2   | DB;SOMGT:0/1:0:19 C | T                    | 0 |   |

|    |     |     |                      |                     |   |   |
|----|-----|-----|----------------------|---------------------|---|---|
|    |     |     | 4.3 2.02             | SOMGT:0/1:0:47 T    | C | 0 |
|    | 0.6 | 0.0 | 0.024 1,N            | SOMGT:0/1:0:59 G    | A | 0 |
|    |     |     | 1,A 5.6 8.61         | SOMGT:0/1:0:59 C    | T | 0 |
|    |     |     |                      | SOMGT:0/1:0:28 C    | A | 0 |
|    |     |     |                      | SOMGT:0/1:0:45 C    | T | 0 |
|    |     |     | 0.1 0                | SOMGT:0/1:0:11 G    | A | 0 |
|    |     |     | 0                    | SOMGT:0/1:0:8,(C    | A | 0 |
|    |     |     | 3.9 4.59             | SOMGT:0/1:0:10 C    | T | 0 |
|    | 0.0 | 0.9 | 1.0,D 1.00C 4.03     | SOMGT:0/1:0:31 C    | A | 0 |
| ## | 0   |     |                      | SOMGT:0/1:0:60 C    | T | 0 |
|    |     |     |                      | SOMGT:0/1:0:24 A    | T | 0 |
|    |     |     |                      | SOMGT:0/1:0:18 G    | A | 0 |
|    | 0.0 | 0.9 | 1.0,D 1,D 2.2 2.54   | SOMGT:0/1:0:10 C    | G | 0 |
|    |     |     |                      | SOMGT:0/1:0:29 G    | A | 0 |
|    |     |     |                      | SOMGT:0/1:0:68 G    | A | 0 |
|    |     |     |                      | SOMGT:0/1:0:71 G    | A | 0 |
|    |     |     | 3.3                  | SOMGT:0/1:0:18 C    | G | 0 |
|    | 0.6 | 0.0 | 0.014 0.945 5.1 2.33 | SOMGT:0/1:0:82 G    | C | 0 |
|    |     |     | 5.3                  | SOMGT:0/1:0:92 G    | T | 0 |
|    |     |     |                      | SOMGT:0/1:0:54 G    | C | 0 |
|    |     |     | 1,D 4 3.48           | SOMGT:0/1:0:35 G    | A | 0 |
|    | 0.2 | 0.0 | 0.009 1,N            | SOMGT:0/1:0:40 C    | A | 0 |
|    |     |     |                      | SOMGT:0/1:0:43 T    | C | 0 |
|    |     |     | 3.5                  | SOMGT:0/1:0:21 C    | T | 0 |
|    | 0.0 | 0.7 | 0.983 1,D 5.5 4.92   | SOMGT:0/1:0:89 C    | T | 0 |
|    |     |     |                      | SOMGT:0/1:0:35 T    | C | 0 |
| ## | 0   |     |                      | SOMGT:0/1:0:40 C    | T | 0 |
|    | 0.0 | 0.0 | 0.22, 1,N 5.3 1.44   | SOMGT:0/1:0:98 A    | G | 0 |
|    |     |     |                      | SOMGT:0/1:0:16 G    | A | 0 |
|    | 0.0 | 1.0 | 1.0,D 1,D 4.8 3.94   | SOMGT:0/1:0:88 C    | G | 0 |
|    |     |     | 3.9                  | SOMGT:0/1:0:16 C    | T | 0 |
|    |     |     |                      | SOMGT:0/1:0:14 G    | C | 0 |
|    | 0.2 | 0.6 | 0.846 1,D 2.3        | SOMGT:0/1:0:12 C    | A | 0 |
|    | 0.0 | 0.6 | 0.934 1,N 4          | SOMGT:0/1:0:48 C    | A | 0 |
|    |     |     | 0.1 0.1              | DB;SOMGT:0/1:0:24 A | G | 0 |
|    |     |     |                      | SOMGT:0/1:0:24 G    | T | 0 |
|    | 0.0 | 0.9 | 0.999 0.994 3.2 3.49 | SOMGT:0/1:0:12 T    | G | 0 |
|    |     |     | 0.2 0.3              | SOMGT:0/1:0:8,(A    | G | 0 |
|    | 0.0 | 0.2 | 0.867 3              | SOMGT:0/1:0:79 G    | T | 0 |
|    |     |     |                      | SOMGT:0/1:0:24 C    | G | 0 |
|    |     |     |                      | SOMGT:0/1:0:31 C    | A | 0 |
|    | 0.6 | 0.0 | 0.002 1,N            | SOMGT:0/1:0:80 G    | C | 0 |
|    |     |     |                      | SOMGT:0/1:0:25 G    | A | 0 |
|    |     |     |                      | SOMGT:0/1:0:48 G    | T | 0 |
|    |     |     |                      | SOMGT:0/1:0:11 G    | C | 0 |
|    |     |     |                      | SOMGT:0/1:0:10 T    | C | 0 |
|    |     |     | 0                    | SOMGT:0/1:0:15 G    | A | 0 |
|    |     |     |                      | SOMGT:0/1:0:16 T    | C | 0 |
| ## | 0   |     | 1.00C                | SOMGT:0/1:0:83 G    | A | 0 |
| ## | 0   | 0.0 | 0.9 1.0,D 1,D 5 4.32 | SOMGT:0/1:0:12 G    | A | 0 |
|    |     |     |                      | SOMGT:0/1:0:65 T    | A | 0 |
|    |     |     |                      | SOMGT:0/1:0:15 T    | G | 0 |
|    |     |     | 2.9                  | SOMGT:0/1:0:21 C    | T | 0 |
|    |     |     | 0                    | SOMGT:0/1:0:29 T    | G | 0 |

|   |   |     |     |       |         |     |      |                             |                    |   |   |
|---|---|-----|-----|-------|---------|-----|------|-----------------------------|--------------------|---|---|
| . | . | .   | .   | .     | .       | .   | .    | SOMGT:/0/1:/0:10 G          | C                  | 0 |   |
| . | . | .   | .   | .     | .       | .   | .    | SOMGT:/0/1:/0:52 C          | G                  | 0 |   |
| . | . | .   | .   | .     | .       | .   | .    | SOMGT:/0/1:/0:37 G          | A                  | 0 |   |
| . | . | .   | .   | .     | .       | .   | .    | SOMGT:/0/1:/0:27 A          | G                  | 0 |   |
| . | . | .   | .   | .     | .       | .   | .    | SOMGT:/0/1:/0:29 G          | A                  | 0 |   |
| . | . | .   | .   | .     | .       | .   | .    | SOMGT:/0/1:/0:11 G          | C                  | 0 |   |
| . | . | 0.0 | 0.4 | 0.938 | 1,D     | 2.9 | 1.62 | SOMGT:/0/1:/0:94 A          | G                  | 0 |   |
| . | . | .   | .   | .     | .       | .   | 0 0  | DB;SOMGT:/0/1:/0:33 G       | A                  | 0 |   |
| . | . | 0.0 | 1.0 | 1.0   | D 1,D   | 5.4 | 4.70 | SOMGT:/0/1:/0:27 C          | A                  | 0 |   |
| . | . | 0.0 | 0.7 | 0.97  | 0.997   | 5.9 | 3.43 | SOMGT:/0/1:/0:52 C          | T                  | 0 |   |
| . | . | .   | .   | .     | .       | .   | 0.2  | 0 SOMGT:/0/1:/0:28 T        | C                  | 0 |   |
| . | . | .   | .   | .     | .       | .   | 3.1  | 4.26                        | SOMGT:/0/1:/0:65 G | A | 0 |
| . | . | .   | .   | .     | .       | .   | 0 0  | SOMGT:/0/1:/0:23 T          | G                  | 0 |   |
| . | . | .   | .   | .     | .       | .   | .    | SOMGT:/0/1:/0:12 G          | C                  | 0 |   |
| . | . | 0.1 | 0.4 | 0.919 | 1.000   | 5.7 | 2.46 | SOMGT:/0/1:/0:47 T          | A                  | 0 |   |
| . | . | 0.0 | 0.9 | 1.0   | D 1.000 | 2.3 | 1.66 | SOMGT:/0/1:/0:45 C          | T                  | 0 |   |
| . | . | 0.0 | 0.8 | 0.993 | 1.000   | 5.8 | 2.89 | SOMGT:/0/1:/0:48 C          | A                  | 0 |   |
| . | . | 0.0 | 0.9 | 1.0   | D 1,D   | 4.5 | 4.02 | SOMGT:/0/1:/0:40 G          | A                  | 0 |   |
| . | . | .   | .   | .     | .       | .   | .    | SOMGT:/0/1:/0:60 G          | A                  | 0 |   |
| . | . | .   | .   | .     | .       | .   | .    | SOMGT:/0/1:/0:56 T          | C                  | 0 |   |
| . | . | .   | .   | .     | .       | .   | 0    | SOMGT:/0/1:/0:11 G          | A                  | 0 |   |
| . | . | .   | .   | .     | .       | .   | 0 0  | SOMGT:/0/1:/0:10 G          | A                  | 0 |   |
| . | . | .   | .   | .     | .       | .   | 0.1  | 0.4 SOMGT:/0/1:/0:31 G      | A                  | 0 |   |
| . | . | .   | .   | .     | .       | .   | 0.5  | 0.5 DB;SOMGT:/0/1:/0:24 T   | A                  | 0 |   |
| . | . | .   | .   | .     | .       | .   | 0    | SOMGT:/0/1:/0:16 T          | A                  | 0 |   |
| . | . | .   | .   | .     | .       | .   | 0    | SOMGT:/0/1:/0:37 C          | A                  | 0 |   |
| . | . | .   | .   | .     | .       | .   | 1.25 | 0 0 SOMGT:/0/1:/0:10 G      | C                  | 0 |   |
| . | . | .   | .   | .     | .       | .   | 1.90 | 0.1 0 DB;SOMGT:/0/1:/0:37 C | T                  | 0 |   |
| . | . | .   | .   | .     | .       | .   | 0    | SOMGT:/0/1:/0:8,(C          | T                  | 0 |   |
| . | . | .   | .   | .     | .       | .   | .    | SOMGT:/0/1:/0:8,(C          | A                  | 0 |   |
| . | . | .   | .   | .     | .       | .   | .    | SOMGT:/0/1:/0:8,(C          | G                  | 0 |   |
| . | . | .   | .   | .     | .       | .   | 0    | 0.4 SOMGT:/0/1:/0:9,(T      | A                  | 0 |   |
| . | . | .   | .   | .     | .       | .   | .    | SOMGT:/0/1:/0:29 G          | T                  | 0 |   |
| . | . | .   | .   | .     | .       | .   | .    | SOMGT:/0/1:/0:8,(C          | A                  | 0 |   |
| . | . | .   | .   | .     | .       | .   | 0.2  | 0.6 SOMGT:/0/1:/0:9,(C      | T                  | 0 |   |
| . | . | .   | .   | .     | .       | .   | 0    | 0 SOMGT:/0/1:/0:33 T        | C                  | 0 |   |
| . | . | .   | .   | .     | .       | .   | 0    | 0 DB;SOMGT:/0/1:/0:25 T     | C                  | 0 |   |
| . | . | .   | .   | .     | .       | .   | 2.1  | 0.1 0 SOMGT:/0/1:/0:44 T    | C                  | 0 |   |
| . | . | .   | .   | .     | .       | .   | 0    | SOMGT:/0/1:/0:10 G          | C                  | 0 |   |
| . | . | .   | .   | .     | .       | .   | 0    | SOMGT:/0/1:/0:12 T          | A                  | 0 |   |
| . | . | .   | .   | .     | .       | .   | 0    | SOMGT:/0/1:/0:10 G          | A                  | 0 |   |
| . | . | .   | .   | .     | .       | .   | 0    | 0 DB;SOMGT:/0/1:/0:25 A     | G                  | 0 |   |
| . | . | .   | .   | .     | .       | .   | .    | SOMGT:/0/1:/0:36 T          | G                  | 0 |   |
| . | . | .   | .   | .     | .       | .   | .    | SOMGT:/0/1:/0:10 T          | A                  | 0 |   |
| . | . | .   | .   | .     | .       | .   | 0.2  | 0.2 SOMGT:/0/1:/0:8,(T      | G                  | 0 |   |
| . | . | .   | .   | .     | .       | .   | 0.1  | 0.3 SOMGT:/0/1:/0:10 T      | C                  | 0 |   |
| . | . | .   | .   | .     | .       | .   | 0    | 0 SOMGT:/0/1:/0:22 C        | T                  | 0 |   |
| . | . | .   | .   | .     | .       | .   | 0    | 0 SOMGT:/0/1:/0:37 G        | A                  | 0 |   |
| . | . | .   | .   | .     | .       | .   | 0    | SOMGT:/0/1:/0:9,(A          | T                  | 0 |   |
| . | . | .   | .   | .     | .       | .   | 0    | 0.1 DB;SOMGT:/0/1:/0:26 G   | T                  | 0 |   |
| . | . | .   | .   | .     | .       | .   | 0    | DB;SOMGT:/0/1:/0:40 A       | T                  | 0 |   |
| . | . | .   | .   | .     | .       | .   | 0    | 0 DB;SOMGT:/0/1:/0:19 G     | A                  | 0 |   |
| . | . | .   | .   | .     | .       | .   | 0    | 0 SOMGT:/0/1:/0:12 G        | T                  | 0 |   |
| . | . | .   | .   | .     | .       | .   | 0    | 0 SOMGT:/0/1:/0:22 C        | A                  | 0 |   |

|   |   |   |   |   |   |   |   |   |   |         |                |            |                |         |       |      |            |                |   |   |   |
|---|---|---|---|---|---|---|---|---|---|---------|----------------|------------|----------------|---------|-------|------|------------|----------------|---|---|---|
| . | . | . | . | . | . | . | . | . | . | 0       | SOMGT:0/1:0:13 | C          | A              | 0       |       |      |            |                |   |   |   |
| . | . | . | . | . | . | . | . | . | . | .       | SOMGT:0:87     | 0/1:0      | T              | G       | 0     |      |            |                |   |   |   |
| . | . | . | . | . | . | . | . | . | . | 0.2     | 0.5            | DB;S       | GT:0:22        | 0/1:0   | G     | C    | 0          |                |   |   |   |
| . | . | . | . | . | . | . | . | . | . | .       | .              | SOMGT:0:16 | 0/1:0          | G       | T     | 0    |            |                |   |   |   |
| . | . | . | . | . | . | . | . | . | . | 0.1     | 0.4            | SOMGT:0:12 | 0/1:0          | C       | G     | 0    |            |                |   |   |   |
| . | . | . | . | . | . | . | . | . | . | 0       | 0              | SOMGT:0:13 | 0/1:0          | C       | G     | 0    |            |                |   |   |   |
| . | . | . | . | . | . | . | . | . | . | 0       | .              | SOMGT:0:22 | 0/1:0          | G       | T     | 0    |            |                |   |   |   |
| . | . | . | . | . | . | . | . | . | . | 0.2     | 0.5            | SOMGT:0:14 | 0/1:0          | C       | A     | 0    |            |                |   |   |   |
| . | . | . | . | . | . | . | . | . | . | 0       | 0              | SOMGT:0:11 | 0/1:0          | G       | T     | 0    |            |                |   |   |   |
| . | . | . | . | . | . | . | . | . | . | .       | .              | SOMGT:0:37 | 0/1:0          | T       | G     | 0    |            |                |   |   |   |
| . | . | . | . | . | . | . | . | . | . | .       | .              | SOMGT:0:8, | (0/1:0         | G       | T     | 0    |            |                |   |   |   |
| . | . | . | . | . | . | . | . | . | . | 0       | 0.1            | SOMGT:0:18 | 0/1:0          | C       | T     | 0    |            |                |   |   |   |
| . | . | . | . | . | . | . | . | . | . | .       | .              | SOMGT:0:13 | 0/1:0          | G       | T     | 0    |            |                |   |   |   |
| . | . | . | . | . | . | . | . | . | . | 0.1     | 0              | SOMGT:0:15 | 0/1:0          | C       | T     | 0    |            |                |   |   |   |
| . | . | . | . | . | . | . | . | . | . | 0.1     | 0.4            | SOMGT:0:8, | (0/1:0         | A       | G     | 0    |            |                |   |   |   |
| . | . | . | . | . | . | . | . | . | . | .       | .              | SOMGT:0:9, | (0/1:0         | T       | C     | 0    |            |                |   |   |   |
| . | . | . | . | . | . | . | . | . | . | 0.1     | 0.3            | SOMGT:0:18 | 0/1:0          | G       | A     | 0    |            |                |   |   |   |
| . | . | . | . | . | . | . | . | . | . | .       | .              | SOMGT:0:10 | 0/1:0          | T       | A     | 0    |            |                |   |   |   |
| . | . | . | . | . | . | . | . | . | . | .       | .              | SOMGT:0:13 | 0/1:0          | C       | A     | 0    |            |                |   |   |   |
| . | . | . | . | . | . | . | . | . | . | .       | .              | SOMGT:0:20 | 0/1:0          | C       | T     | 0    |            |                |   |   |   |
| . | . | . | . | . | . | . | . | . | . | 0.1     | 0.3            | DB;S       | GT:0:51        | 0/1:0   | C     | G    | 0          |                |   |   |   |
| . | . | . | . | . | . | . | . | . | . | 0.1     | 0.1            | SOMGT:0:12 | 0/1:0          | G       | C     | 0    |            |                |   |   |   |
| . | . | . | . | . | . | . | . | . | . | 0       | .              | SOMGT:0:41 | 0/1:0          | C       | G     | 0    |            |                |   |   |   |
| . | . | . | . | . | . | . | . | . | . | 0       | .              | SOMGT:0:46 | 0/1:0          | T       | A     | 0    |            |                |   |   |   |
| . | . | . | . | . | . | . | . | . | . | 0.0:0.1 | 0.763          | 1.000      | 5.2            | 2.74    | 0     | .    | SOMGT:0:58 | 0/1:0          | T | G | 0 |
| . | . | . | . | . | . | . | . | . | . | 0       | .              | SOMGT:0:8, | (0/1:0         | G       | T     | 0    |            |                |   |   |   |
| . | . | . | . | . | . | . | . | . | . | 0       | 0              | SOMGT:0:8, | (0/1:0         | C       | T     | 0    |            |                |   |   |   |
| . | . | . | . | . | . | . | . | . | . | 0       | 0.1            | SOMGT:0:8, | (0/1:0         | C       | A     | 0    |            |                |   |   |   |
| . | . | . | . | . | . | . | . | . | . | 2.7     | .              | .          | SOMGT:0:15     | 0/1:0   | A     | C    | 0          |                |   |   |   |
| . | . | . | . | . | . | . | . | . | . | 1.80    | .              | .          | SOMGT:0:12     | 0/1:0   | T     | C    | 0          |                |   |   |   |
| . | . | . | . | . | . | . | . | . | . | 0       | 0              | SOMGT:0:35 | 0/1:0          | T       | G     | 0    |            |                |   |   |   |
| . | . | . | . | . | . | . | . | . | . | 0       | 0.1            | SOMGT:0:17 | 0/1:0          | C       | T     | 0    |            |                |   |   |   |
| . | . | . | . | . | . | . | . | . | . | .       | .              | SOMGT:0:11 | 0/1:0          | C       | A     | 0    |            |                |   |   |   |
| . | . | . | . | . | . | . | . | . | . | 0       | 0.1            | SOMGT:0:10 | 0/1:0          | G       | A     | 0    |            |                |   |   |   |
| . | . | . | . | . | . | . | . | . | . | 0       | 0.1            | SOMGT:0:14 | 0/1:0          | C       | T     | 0    |            |                |   |   |   |
| . | . | . | . | . | . | . | . | . | . | 0       | .              | SOMGT:0:16 | 0/1:0          | G       | A     | 0    |            |                |   |   |   |
| . | . | . | . | . | . | . | . | . | . | ##      | 0              | .          | SOMGT:0:12     | 0/1:0   | T     | C    | 0          |                |   |   |   |
| . | . | . | . | . | . | . | . | . | . | 1.26    | 0              | .          | SOMGT:0:13     | 0/1:0   | C     | T    | 0          |                |   |   |   |
| . | . | . | . | . | . | . | . | . | . | 0       | 0.2            | DB;S       | GT:0:37        | 0/1:0   | G     | A    | 0          |                |   |   |   |
| . | . | . | . | . | . | . | . | . | . | 0       | 0              | SOMGT:0:18 | 0/1:0          | G       | A     | 0    |            |                |   |   |   |
| . | . | . | . | . | . | . | . | . | . | 0       | 0.1            | DB;S       | GT:0:20        | 0/1:0   | G     | T    | 0          |                |   |   |   |
| . | . | . | . | . | . | . | . | . | . | 0       | 0.1            | DB;S       | GT:0:34        | 0/1:0   | T     | C    | 0          |                |   |   |   |
| . | . | . | . | . | . | . | . | . | . | 2.2     | 0              | 0.1        | DB;S           | GT:0:40 | 0/1:0 | C    | T          | 0              |   |   |   |
| . | . | . | . | . | . | . | . | . | . | .       | .              | SOMGT:0:16 | 0/1:0          | T       | C     | 0    |            |                |   |   |   |
| . | . | . | . | . | . | . | . | . | . | .       | .              | SOMGT:0:11 | 0/1:0          | C       | A     | 0    |            |                |   |   |   |
| . | . | . | . | . | . | . | . | . | . | .       | .              | SOMGT:0:12 | 0/1:0          | C       | A     | 0    |            |                |   |   |   |
| . | . | . | . | . | . | . | . | . | . | 0       | 0              | SOMGT:0:9, | (0/1:0         | G       | T     | 0    |            |                |   |   |   |
| . | . | . | . | . | . | . | . | . | . | .       | .              | SOMGT:0:44 | 0/1:0          | T       | A     | 0    |            |                |   |   |   |
| . | . | . | . | . | . | . | . | . | . | 0.1     | 0.3            | DB;S       | GT:0:40        | 0/1:0   | C     | T    | 0          |                |   |   |   |
| . | . | . | . | . | . | . | . | . | . | .       | .              | SOMGT:0:9, | (0/1:0         | C       | A     | 0    |            |                |   |   |   |
| . | . | . | . | . | . | . | . | . | . | ##      | 0              | 0.1:0.9    | 1.0,D          | 1.000   | 4.2   | 2.42 | .          | SOMGT:0/1:0:10 | C | T | 0 |
| . | . | . | . | . | . | . | . | . | . | 2.3     | .              | .          | SOMGT:0/1:0:47 | C       | T     | 0    |            |                |   |   |   |
| . | . | . | . | . | . | . | . | . | . | 2.9     | .              | .          | SOMGT:0/1:0:33 | G       | C     | 0    |            |                |   |   |   |
| . | . | . | . | . | . | . | . | . | . | 2.6     | .              | .          | SOMGT:0/1:0:11 | G       | C     | 0    |            |                |   |   |   |

|       |     |     |       |       |       |         |                    |                  |                     |                  |   |   |
|-------|-----|-----|-------|-------|-------|---------|--------------------|------------------|---------------------|------------------|---|---|
|       |     |     |       | 2.3   |       |         | SOMGT:0/1:0:10 C   | T                | 0                   |                  |   |   |
|       | 0.0 |     | 0.994 | 3.2   | 2.83  |         | SOMGT:0/1:0:85 G   | A                | 0                   |                  |   |   |
|       |     |     |       | 2.1   | 1.40  |         | SOMGT:0/1:0:13 G   | T                | 0                   |                  |   |   |
|       |     |     |       |       |       |         | SOMGT:0/1:0:12 C   | T                | 0                   |                  |   |   |
|       |     |     | 1,A   | 5.3   | 7.23  |         | SOMGT:0/1:0:30 C   | T                | 0                   |                  |   |   |
|       |     |     |       |       |       | 0 0     | SOMGT:0/1:0:8,(T   | C                | 0                   |                  |   |   |
|       |     |     |       |       |       |         | 0 SOMGT:0/1:0:11 G | A                | 0                   |                  |   |   |
|       |     |     |       |       |       | 0.1 0.4 | SOMGT:0/1:0:13 C   | T                | 0                   |                  |   |   |
|       |     |     |       |       |       | 0 0     | SOMGT:0/1:0:9,(G   | C                | 0                   |                  |   |   |
|       |     |     |       |       |       | 0       | SOMGT:0/1:0:20 A   | T                | 0                   |                  |   |   |
|       |     |     |       |       |       |         | 0 SOMGT:0/1:0:57 G | A                | 0                   |                  |   |   |
|       |     |     |       |       |       |         | SOMGT:0/1:0:17 A   | C                | 0                   |                  |   |   |
|       |     |     |       |       |       | 0 0.1   | SOMGT:0/1:0:16 T   | G                | 0                   |                  |   |   |
|       | 0.0 | 0.9 | 0.996 | 0.963 | 4.3   | 3.06    | 0                  | SOMGT:0/1:0:38 C | T                   | 0                |   |   |
|       |     |     |       | 5.4   | 1.82  |         |                    | SOMGT:0/1:0:10 G | C                   | 0                |   |   |
|       |     |     |       |       |       |         |                    | SOMGT:0/1:0:10 G | A                   | 0                |   |   |
|       |     |     |       |       |       |         |                    | SOMGT:0/1:0:10 A | G                   | 0                |   |   |
|       |     |     |       |       |       |         |                    | SOMGT:0/1:0:10 C | T                   | 0                |   |   |
|       |     |     |       |       |       |         |                    | SOMGT:0/1:0:30 G | T                   | 0                |   |   |
|       |     |     |       | 3     |       |         |                    | SOMGT:0/1:0:47 G | C                   | 0                |   |   |
| ##    | 0   | 0.4 | 0.1   | 0.796 | 1,D   | 5.4     | 3.42               |                  | SOMGT:0/1:0:14 G    | A                | 0 |   |
|       |     |     |       | 2.3   |       |         |                    |                  | SOMGT:0/1:0:17 C    | T                | 0 |   |
|       |     |     |       |       |       |         |                    |                  | SOMGT:0/1:0:11 G    | C                | 0 |   |
|       | 0.1 | 0.4 | 0.896 | 1,N   | 3.3   | 1.89    |                    |                  | SOMGT:0/1:0:14 C    | T                | 0 |   |
| ##    | 0   |     |       |       |       | 1.59    |                    |                  | SOMGT:0/1:0:12 C    | T                | 0 |   |
| ##    | 0   |     |       |       |       |         |                    |                  | SOMGT:0/1:0:17 G    | A                | 0 |   |
|       |     |     |       |       |       |         | 0.1 0              |                  | SOMGT:0/1:0:14 A    | G                | 0 |   |
| ##    | 0   | 0.0 | 0.6   | 0.918 | 0.976 | 4.9     | 3.84               |                  | SOMGT:0/1:0:23 C    | G                | 0 |   |
|       |     |     |       |       |       |         |                    |                  | SOMGT:0/1:0:15 A    | G                | 0 |   |
| 0.003 | 0   | 0   | 0.2   | 0.1   | 0.791 | 0.946   | 3.4                |                  | DB;SOMGT:0/1:0:10 G | A                | 0 |   |
|       |     |     |       |       |       |         |                    |                  | SOMGT:0/1:0:14 C    | T                | 0 |   |
|       |     |     |       | 1,D   | 2.9   | 6.40    |                    |                  | SOMGT:0/1:0:67 G    | A                | 0 |   |
|       |     |     |       | 1,D   | 5.1   | 4.27    |                    |                  | SOMGT:0/1:0:55 G    | C                | 0 |   |
|       | 0.0 | 0.8 | 0.919 | 1.000 | 4.4   | 4.65    |                    |                  | SOMGT:0/1:0:14 C    | T                | 0 |   |
|       |     |     |       |       |       |         |                    |                  | SOMGT:0/1:0:12 T    | C                | 0 |   |
|       |     |     |       |       |       |         |                    |                  | SOMGT:0/1:0:23 C    | T                | 0 |   |
|       | 0.0 | 0.1 | 0.693 | 1.000 | 5.1   | 2.94    | 0                  |                  | SOMGT:0/1:0:31 G    | A                | 0 |   |
|       | 0.0 | 0.0 | 0.004 | 0.859 | 3.7   | 2.36    |                    |                  | SOMGT:0/1:0:10 G    | A                | 0 |   |
|       |     |     |       |       |       |         |                    |                  | SOMGT:0/1:0:21 G    | A                | 0 |   |
|       | 0.0 | 0.2 | 0.891 | 0.757 | 4.5   | 3.26    |                    |                  | SOMGT:0/1:0:14 C    | G                | 0 |   |
|       |     |     |       |       |       | 2.6     | 2.09               |                  | SOMGT:0/1:0:17 C    | G                | 0 |   |
| ##    | 0   |     |       |       |       |         |                    |                  | SOMGT:0/1:0:26 T    | C                | 0 |   |
|       | 0.0 | 0.6 | 0.915 | 1,D   | 5.1   | 3.61    |                    |                  | SOMGT:0/1:0:25 A    | T                | 0 |   |
|       |     |     |       |       |       |         |                    |                  | SOMGT:0/1:0:61 G    | A                | 0 |   |
| 0     | 0   |     |       |       |       | 4.6     | 2.69               |                  | SOMGT:0/1:0:16 T    | G                | 0 |   |
| 2E-04 | ##  | 0   | 0.0   | 0.8   | 0.999 | 1,N     | 3.2                | 1.45             |                     | SOMGT:0/1:0:31 C | T | 0 |
|       | ##  | 0   |       |       |       | 2.4     |                    |                  | SOMGT:0/1:0:18 G    | A                | 0 |   |
|       | ##  | 0   |       |       |       |         |                    | 0                | SOMGT:0/1:0:59 G    | A                | 0 |   |
|       |     |     |       |       |       |         |                    |                  | SOMGT:0/1:0:8,(T    | G                | 0 |   |
|       |     |     |       |       |       |         |                    |                  | SOMGT:0/1:0:17 C    | T                | 0 |   |
|       | ##  | 0   |       |       |       | 2.9     | 2.55               |                  | SOMGT:0/1:0:10 G    | A                | 0 |   |
| ##### | ##  | 0   | 0.1   | 0.0   | 0.064 | 0.758   | 4.1                | 2.41             |                     | SOMGT:0/1:0:28 G | A | 0 |
|       | 0   | 0   |       |       |       |         |                    | 0 0              | SOMGT:0/1:0:29 G    | A                | 0 |   |
|       | ##  | 0   |       |       |       |         |                    |                  | SOMGT:0/1:0:27 G    | A                | 0 |   |

|       |    |   |     |     |       |         |     |      |      |     |                |             |   |   |   |
|-------|----|---|-----|-----|-------|---------|-----|------|------|-----|----------------|-------------|---|---|---|
|       | ## | 0 | 0.1 | 0.5 | 0.85  | 0.982   | 2.8 | 3.03 | 0    |     | SOMGT:0/1:0:17 | G           | A | 0 |   |
|       |    |   |     |     |       |         |     |      |      |     | SOMGT:0/1:0:10 | C           | T | 0 |   |
|       |    |   | 0.0 | 0.9 | 1.0   | D 1,D   | 5.2 | 5.53 |      |     | SOMGT:0/1:0:25 | G           | A | 0 |   |
|       |    |   |     |     |       |         |     |      | 0    | 0   | SOMGT:0/1:0:10 | A           | T | 0 |   |
|       |    |   |     |     |       |         |     |      |      |     | SOMGT:0/1:0:24 | C           | T | 0 |   |
|       | 0  | 0 |     |     |       |         | 3.4 | 1.86 | 0    | 0   | SOMGT:0/1:0:10 | C           | G | 0 |   |
|       |    |   |     |     |       |         |     | 2.44 |      |     | SOMGT:0/1:0:41 | T           | C | 0 |   |
|       | ## | 0 | 0.0 | 0.0 | 0.012 | 0.998   |     | 3.22 |      |     | SOMGT:0/1:0:32 | G           | A | 0 |   |
|       |    |   |     |     |       |         |     |      |      |     | SOMGT:0/1:0:90 | G           | C | 0 |   |
|       |    |   |     |     |       |         |     |      |      |     | SOMGT:0/1:0:97 | G           | A | 0 |   |
|       |    |   | 0.6 | 0.9 | 1.0   | D 1,D   | 4.7 | 4.05 |      |     | SOMGT:0/1:0:14 | C           | G | 0 |   |
| 0.002 | 0  | 0 | 0.1 | 0.2 | 0.88  | 1.088   | 4.4 | 3.43 |      |     | SOMGT:0/1:0:10 | G           | A | 0 |   |
|       |    |   |     |     |       |         |     | 3.9  | 1.92 |     | SOMGT:0/1:0:21 | T           | C | 0 |   |
|       |    |   |     |     |       |         |     | 2.06 |      |     | SOMGT:0/1:0:29 | G           | T | 0 |   |
|       |    |   |     |     |       |         |     |      | 0.1  | 0.1 | SOMGT:0/1:0:8  | (C          | G | 0 |   |
|       |    |   |     |     |       |         |     |      |      |     | SOMGT:0/1:0:12 | C           | A | 0 |   |
|       |    |   |     |     |       |         |     |      |      |     | SOMGT:0/1:0:88 | A           | C | 0 |   |
|       |    |   |     |     |       |         |     | 2.69 |      |     | SOMGT:0/1:0:21 | C           | T | 0 |   |
|       |    |   |     |     |       |         |     | 4.15 |      |     | SOMGT:0/1:0:30 | C           | T | 0 |   |
|       | ## | 0 | 0.0 | 0.5 | 0.948 | 1,N     |     | 2.41 |      |     | SOMGT:0/1:0:55 | C           | T | 0 |   |
|       | ## | 0 |     |     |       |         |     |      |      |     | SOMGT:0/1:0:15 | C           | T | 0 |   |
|       |    |   |     |     |       |         |     |      |      |     | SOMGT:0/1:0:41 | C           | T | 0 |   |
|       |    |   |     |     |       |         |     |      |      |     | SOMGT:0/1:0:9  | (T          | C | 0 |   |
|       |    |   |     |     |       |         |     |      | 0    | 0   | SOMGT:0/1:0:53 | A           | G | 0 |   |
|       |    |   |     |     |       |         |     |      | 0    | 0   | SOMGT:0/1:0:50 | G           | A | 0 |   |
|       |    |   |     |     |       |         |     |      |      |     | SOMGT:0/1:0:23 | T           | C | 0 |   |
|       | ## | 0 |     |     |       | 1.000   |     |      |      |     | SOMGT:0/1:0:84 | C           | T | 0 |   |
|       | 0  | 0 |     |     |       |         |     | 3.8  |      |     | SOMGT:0/1:0:66 | C           | T | 0 |   |
|       | ## | 0 |     |     |       |         |     |      |      |     | SOMGT:0/1:0:14 | G           | A | 0 |   |
|       |    |   |     |     |       |         |     |      |      |     | SOMGT:0/1:0:13 | T           | G | 0 |   |
|       |    |   |     |     |       |         |     |      | 0    | 0   | SOMGT:0/1:0:14 | T           | G | 0 |   |
|       |    |   | 0.0 | 0.0 | 0.0   | B 1,N   |     |      |      |     | SOMGT:0/1:0:56 | G           | C | 0 |   |
| 0.001 | 0  | 0 |     |     |       |         |     |      | 0    | 0   | SOMGT:0/1:0:16 | G           | A | 0 |   |
|       |    |   |     |     |       |         |     |      |      |     | SOMGT:0/1:0:27 | G           | T | 0 |   |
|       |    |   |     |     |       |         |     |      | 0.1  | 0.2 | DB;S           | GT:0/1:0:19 | C | G | 0 |
|       |    |   |     |     |       |         |     |      | 0    |     | SOMGT:0/1:0:9  | (T          | C | 0 |   |
|       | ## |   |     |     |       |         |     | 1.49 | 0    |     | SOMGT:0/1:0:12 | G           | A | 0 |   |
|       | ## | 0 |     |     |       |         |     |      |      |     | SOMGT:0/1:0:16 | G           | A | 0 |   |
|       |    |   |     |     |       |         |     | 2.4  |      |     | SOMGT:0/1:0:16 | G           | A | 0 |   |
|       |    |   |     |     |       |         |     | 4    | 3.19 |     | SOMGT:0/1:0:38 | C           | T | 0 |   |
| ##### | ## | 0 | 0.0 | 0.9 | 1.0   | D 1,000 | 4.6 | 1.33 |      |     | SOMGT:0/1:0:38 | G           | A | 0 |   |
|       |    |   |     |     |       |         |     |      |      |     | SOMGT:0/1:0:95 | C           | A | 0 |   |
|       |    |   |     |     |       |         |     |      | 0    | 0.1 | SOMGT:0/1:0:11 | A           | G | 0 |   |
|       |    |   |     |     |       |         |     |      |      |     | SOMGT:0/1:0:83 | A           | G | 0 |   |
|       | 0  | 0 |     |     |       |         |     |      | 0    | 0   | SOMGT:0/1:0:40 | G           | C | 0 |   |
|       |    |   |     |     |       |         |     | 2.3  |      |     | SOMGT:0/1:0:60 | C           | G | 0 |   |
|       |    |   |     |     |       |         |     |      |      |     | SOMGT:0/1:0:25 | G           | A | 0 |   |
|       |    |   |     |     |       |         |     |      |      |     | SOMGT:0/1:0:30 | G           | C | 0 |   |
|       |    |   |     |     |       |         |     |      |      |     | SOMGT:0/1:0:11 | G           | A | 0 |   |
|       |    |   |     |     |       | 1,A     | 4.6 | 8.20 |      |     | SOMGT:0/1:0:70 | C           | T | 0 |   |
|       |    |   | 0.1 | 0.0 | 0.02  | 1,N     |     |      |      |     | SOMGT:0/1:0:37 | A           | G | 0 |   |
|       |    |   |     |     |       |         |     |      |      |     | SOMGT:0/1:0:11 | C           | T | 0 |   |
|       |    |   |     |     |       |         |     |      | 0    | 0   | SOMGT:0/1:0:16 | A           | G | 0 |   |
|       |    |   |     |     |       |         |     |      | 0    |     | SOMGT:0/1:0:36 | G           | A | 0 |   |

|       |      |               |       |              |         |                     |   |   |
|-------|------|---------------|-------|--------------|---------|---------------------|---|---|
|       |      |               |       |              | 0.1 0.3 | SOMGT:0/1:0:8,(G    | T | 0 |
|       |      |               |       |              | 0 0.1   | SOMGT:0/1:0:9,(T    | A | 0 |
|       |      |               |       |              | 0 .     | SOMGT:0/1:0:54 A    | T | 0 |
|       |      |               |       |              | 0.2 0.2 | SOMGT:0/1:0:9,(G    | T | 0 |
|       | 0 0  |               |       |              | 0.2 0.4 | DB;SOMGT:0/1:0:39 G | A | 0 |
|       |      |               |       |              |         | SOMGT:0/1:0:40 C    | T | 0 |
|       |      |               |       |              |         | SOMGT:0/1:0:49 G    | T | 0 |
|       | ## 0 |               |       |              |         | SOMGT:0/1:0:50 G    | A | 0 |
|       |      |               |       | 3.7 1.32     |         | SOMGT:0/1:0:21 G    | A | 0 |
|       | ## 0 |               |       | 3.4 2.15 0 0 |         | SOMGT:0/1:0:11 C    | T | 0 |
|       | ## 0 | 0.0,1.0,1.0,D | 1.000 | 3.1 4.05 0 . |         | SOMGT:0/1:0:19 C    | T | 0 |
|       |      | 0.0,0.9,0.99  | 0.99  | 4.6 3.60 .   |         | SOMGT:0/1:0:27 G    | C | 0 |
|       |      |               |       |              | 0 0     | SOMGT:0/1:0:15 T    | C | 0 |
|       |      |               |       | 3.3 . . .    |         | SOMGT:0/1:0:38 A    | G | 0 |
| ##### | ## 0 | 0.0,0.1,0.08  | 0.58  | 3. 2.62 . .  |         | SOMGT:0/1:0:58 G    | A | 0 |
|       | 0 0  | 0.4,0.0,0.002 | 1,N   | 0 . . .      |         | SOMGT:0/1:0:34 C    | T | 0 |
| 2E-04 | 0 0  |               |       | 2.2 . . .    |         | SOMGT:0/1:0:84 C    | T | 0 |
| 2E-04 | 0 0  | 0.6,0.0,0.00  | 1,N   | 2.04 . . .   |         | SOMGT:0/1:0:80 G    | A | 0 |
|       |      |               | 1,D   | 4.1 9.70 . . |         | SOMGT:0/1:0:14 C    | T | 0 |
|       |      |               |       |              |         | SOMGT:0/1:0:47 T    | G | 0 |
|       |      |               |       |              |         | SOMGT:0/1:0:69 T    | C | 0 |
|       |      |               |       |              |         | SOMGT:0/1:0:55 G    | A | 0 |
|       |      |               |       |              |         | SOMGT:0/1:0:47 G    | A | 0 |
|       |      |               |       |              | 0.2 0.2 | DB;SOMGT:0/1:0:26 A | T | 0 |
|       |      |               |       |              | 0 0     | SOMGT:0/1:0:9,(T    | C | 0 |
|       |      |               |       |              |         | SOMGT:0/1:0:25 G    | A | 0 |
|       | ## 0 |               |       |              |         | SOMGT:0/1:0:92 C    | T | 0 |
|       |      |               |       |              |         | SOMGT:0/1:0:28 C    | T | 0 |
|       |      |               |       | 2.2 1.64 . . |         | SOMGT:0/1:0:16 C    | A | 0 |
|       |      | 0.2,0.0,0.00  | 0.99  | 4.3 1.98 . . |         | SOMGT:0/1:0:13 G    | A | 0 |
|       |      |               |       | 2.7 . . .    |         | SOMGT:0/1:0:59 G    | A | 0 |
|       | ## 0 |               |       |              | 0 .     | SOMGT:0/1:0:55 G    | A | 0 |
|       |      |               |       | 2.3 . . .    | 0 .     | SOMGT:0/1:0:21 A    | T | 0 |
|       |      |               |       |              |         | SOMGT:0/1:0:14 C    | T | 0 |
|       |      |               |       |              |         | SOMGT:0/1:0:47 C    | A | 0 |
| 0.001 | 0 0  |               |       |              |         | SOMGT:0/1:0:58 G    | A | 0 |
|       |      |               |       |              | 0 0.1   | SOMGT:0/1:0:8,(G    | A | 0 |
|       | ## 0 |               |       | 3.53 0 . . . |         | SOMGT:0/1:0:43 G    | A | 0 |
|       |      |               |       |              | 0       | SOMGT:0/1:0:58 A    | T | 0 |
|       |      |               |       | 5.4 1.35 . . |         | SOMGT:0/1:0:15 G    | T | 0 |
| ##### | ## 0 |               |       |              | 0 .     | SOMGT:0/1:0:25 G    | A | 0 |
|       |      |               |       |              |         | SOMGT:0/1:0:25 C    | T | 0 |
|       |      |               |       |              |         | SOMGT:0/1:0:8,(G    | A | 0 |
|       |      | 0.0,0.9,1.0,D | 1,D   | 5.8 4.25 . . |         | SOMGT:0/1:0:79 C    | T | 0 |
|       |      | 0.0,0.9,1.0,D | 1,D   | 5.9 4.98 . . |         | SOMGT:0/1:0:10 G    | A | 0 |
|       |      |               |       |              | 0 .     | SOMGT:0/1:0:56 G    | A | 0 |
|       |      |               |       |              | 0.1 0.3 | DB;SOMGT:0/1:0:22 T | C | 0 |
|       |      |               |       |              |         | SOMGT:0/1:0:11 G    | A | 0 |
|       |      |               |       |              |         | SOMGT:0/1:0:9,(C    | A | 0 |
|       |      | 0.0,0.5,0.9,P | 1.000 | 2.7 3.35 . . |         | SOMGT:0/1:0:85 G    | A | 0 |
|       |      |               |       | 4.9 4.07 . . |         | SOMGT:0/1:0:25 C    | T | 0 |
|       |      | 0.1,0.2,0.59  | 0.99  | 2.9 2.50 . . |         | SOMGT:0/1:0:74 C    | G | 0 |
|       |      | 0.1,0.5,0.83  | 1,N   |              |         | SOMGT:0/1:0:65 T    | A | 0 |
|       |      |               |       |              | 0 0     | SOMGT:0/1:0:8,(G    | A | 0 |

|       |    |     |       |       |             |          |                       |   |   |
|-------|----|-----|-------|-------|-------------|----------|-----------------------|---|---|
|       |    |     |       |       |             |          | SOMGT:0/1:0:43 G      | C | 0 |
|       |    |     |       |       |             |          | SOMGT:0/1:0:28 G      | C | 0 |
|       | ## | 0   |       |       |             |          | SOMGT:0/1:0:52 G      | A | 0 |
|       |    |     |       |       |             |          | SOMGT:0/1:0:93 T      | A | 0 |
|       |    |     |       |       |             |          | SOMGT:0/1:0:20 C      | A | 0 |
|       |    | 0.0 | 1.0   | 1.0   | D 1,D       | 4.09     | SOMGT:0/1:0:81 T      | G | 0 |
|       |    |     |       |       |             |          | SOMGT:0/1:0:55 T      | C | 0 |
|       |    |     |       |       |             |          | SOMGT:0/1:0:14 T      | C | 0 |
|       |    | 0.0 | 1.0   | 1.0   | D 1,D       | 5 3.25   | SOMGT:0/1:0:63 G      | A | 0 |
|       | ## | 0   | 0.0   | 0.3   | 0.517 1,D   | 5.7 4.40 | 0 DB;SOMGT:0/1:0:19 C | T | 0 |
| 0.006 | 0  | 0   |       |       |             |          | DB;SOMGT:0/1:0:15 G   | A | 0 |
|       |    |     |       |       |             |          | SOMGT:0/1:0:86 T      | A | 0 |
|       |    |     |       |       |             |          | SOMGT:0/1:0:62 G      | A | 0 |
|       |    |     |       |       |             |          | SOMGT:0/1:0:33 G      | A | 0 |
|       |    |     |       |       |             | 1.37     | SOMGT:0/1:0:47 C      | T | 0 |
|       |    |     |       |       |             | 1.50     | 0 SOMGT:0/1:0:36 G    | A | 0 |
|       |    |     |       |       |             | 0        | SOMGT:0/1:0:31 G      | A | 0 |
|       |    | 0.1 | 0.6   | 0.623 | 0.884       | 2.43     | SOMGT:0/1:0:14 A      | G | 0 |
|       |    | 0.0 | 0.6   | 0.978 | 1,D         | 4.4 3.66 | SOMGT:0/1:0:11 C      | T | 0 |
|       |    |     |       |       |             | 0        | 0 SOMGT:0/1:0:10 A    | C | 0 |
|       |    |     |       |       |             | 0        | SOMGT:0/1:0:41 T      | A | 0 |
|       |    |     |       |       |             |          | SOMGT:0/1:0:13 G      | A | 0 |
|       |    |     |       |       |             | 2.3 2.10 | SOMGT:0/1:0:70 T      | C | 0 |
|       |    |     |       |       |             |          | SOMGT:0/1:0:98 C      | A | 0 |
|       |    |     |       |       |             | 0        | SOMGT:0/1:0:37 A      | C | 0 |
|       |    |     |       |       |             |          | SOMGT:0/1:0:30 C      | A | 0 |
|       |    |     |       |       |             | 2.2 1.33 | SOMGT:0/1:0:40 C      | T | 0 |
|       |    |     |       |       |             | 0        | SOMGT:0/1:0:53 C      | T | 0 |
|       |    |     |       |       |             | 3 1.38   | SOMGT:0/1:0:66 C      | A | 0 |
|       |    |     |       |       |             |          | SOMGT:0/1:0:86 C      | G | 0 |
|       |    |     |       |       |             |          | SOMGT:0/1:0:18 T      | A | 0 |
|       |    |     |       |       |             |          | SOMGT:0/1:0:13 T      | C | 0 |
|       |    |     |       |       |             |          | SOMGT:0/1:0:9,(A      | T | 0 |
|       | ## | 0   | 0.7   | 0.0   | 0.0,B 0.989 |          | SOMGT:0/1:0:10 C      | T | 0 |
|       |    | 0.0 | 0.9   | 1.0   | D 1.000     | 4.9 3.96 | SOMGT:0/1:0:55 A      | T | 0 |
|       |    |     |       |       |             |          | SOMGT:0/1:0:19 G      | A | 0 |
|       |    |     |       |       |             | 1.73     | SOMGT:0/1:0:75 C      | T | 0 |
|       |    |     |       |       |             |          | SOMGT:0/1:0:72 G      | A | 0 |
|       |    |     |       |       |             |          | SOMGT:0/1:0:29 G      | A | 0 |
|       | ## | 0   |       |       |             |          | SOMGT:0/1:0:12 G      | A | 0 |
|       |    | 0.0 | 0.9   | 1.0   | D 1.000     | 4 5.08   | SOMGT:0/1:0:15 G      | A | 0 |
| 2E-04 | ## | 0   |       |       |             |          | SOMGT:0/1:0:52 G      | A | 0 |
|       |    | 0.0 | 0.0   | 0.014 | 1.000       | 3.33     | SOMGT:0/1:0:56 G      | T | 0 |
|       |    |     |       |       |             |          | SOMGT:0/1:0:26 C      | T | 0 |
|       |    | 0.0 | 0.4   | 0.93  | 1.000       | 3.58     | SOMGT:0/1:0:19 T      | G | 0 |
|       |    |     |       |       |             |          | SOMGT:0/1:0:12 G      | A | 0 |
|       |    |     |       |       |             |          | SOMGT:0/1:0:72 C      | G | 0 |
|       |    |     |       |       |             |          | SOMGT:0/1:0:37 G      | A | 0 |
|       |    | 0.9 | 0.999 | 1,N   | 2.4 1.61    |          | SOMGT:0/1:0:11 C      | T | 0 |
|       | 0  | 0   |       |       |             | 1.38     | 0 SOMGT:0/1:0:65 C    | T | 0 |
|       |    |     |       |       |             |          | SOMGT:0/1:0:10 C      | T | 0 |
|       | ## | 0   |       |       |             |          | SOMGT:0/1:0:52 C      | T | 0 |
|       |    |     |       |       |             |          | SOMGT:0/1:0:23 C      | A | 0 |
|       | 0  | 0   | 0.0   | 0.9   | 1.0,D 1,D   | 4.8 3.91 | SOMGT:0/1:0:10 G      | A | 0 |



|       |    |     |     |       |       |       |      |                       |                       |                    |   |   |
|-------|----|-----|-----|-------|-------|-------|------|-----------------------|-----------------------|--------------------|---|---|
| .     | .  | .   | .   | .     | .     | .     | .    | SOMGT:0/1:20:15 A     | G                     | 0                  |   |   |
| .     | .  | .   | .   | .     | .     | .     | .    | SOMGT:0:39 0/1:2 C    | T                     | 0                  |   |   |
| .     | .  | .   | .   | .     | .     | 0.3   | 0.4  | DB;SOMGT:0:34 0/1:2 T | C                     | 0                  |   |   |
| .     | .  | .   | .   | .     | .     | 0     | .    | SOMGT:0:86 0/1:2 C    | T                     | 0                  |   |   |
| ##### | ## | 0   | 0.0 | 0.9   | 1.0,D | 1.000 | 2.9  | 3.92                  | SOMGT:0:35 0/1:2 G    | A                  | 0 |   |
| .     | .  | .   | .   | .     | .     | 1,A   | 5.9  | 5.29                  | SOMGT:0:30 0/1:2 G    | T                  | 0 |   |
| .     | .  | .   | .   | .     | .     | .     | 0.1  | 0.1                   | DB;SOMGT:0:33 0/1:2 T | C                  | 0 |   |
| .     | .  | .   | .   | .     | .     | .     | 0    | 0.1                   | SOMGT:0:8,(0/1:2 A    | G                  | 0 |   |
| .     | .  | .   | .   | .     | .     | .     | 0    | 0                     | SOMGT:0:8,(0/1:2 A    | G                  | 0 |   |
| .     | 0  | 0   | .   | .     | .     | .     | .    | 0                     | 0                     | SOMGT:0:19 0/1:2 C | T | 0 |
| .     | 0  | 0   | .   | .     | .     | .     | .    | 0.1                   | 0                     | SOMGT:0:35 0/1:2 C | T | 0 |
| .     | .  | .   | .   | .     | .     | .     | .    | 0                     | .                     | SOMGT:0:42 0/1:2 A | G | 0 |
| ##### | ## | 0   | .   | .     | .     | .     | .    | .                     | SOMGT:0:12 0/1:2 C    | T                  | 0 |   |
| .     | .  | .   | .   | .     | .     | .     | .    | .                     | SOMGT:0:95 0/1:2 G    | C                  | 0 |   |
| .     | .  | 0.0 | 0.9 | 0.992 | 1,D   |       | 3.6  | 3.92                  | SOMGT:0:12 0/1:2 C    | G                  | 0 |   |
| .     | .  | 0.0 | 1.0 | 1.0,D | 1,D   |       | 4.4  | 4.19                  | SOMGT:0:78 0/1:2 G    | A                  | 0 |   |
| .     | 0  | 0   | .   | .     | .     | .     | .    | .                     | SOMGT:0:13 0/1:2 G    | A                  | 0 |   |
| .     | .  | .   | .   | .     | .     | .     | .    | .                     | SOMGT:0:41 0/1:2 G    | A                  | 0 |   |
| .     | .  | .   | .   | .     | .     | .     | 2.12 | .                     | SOMGT:0:37 0/1:2 C    | A                  | 0 |   |
| .     | .  | .   | .   | .     | .     | .     | .    | .                     | SOMGT:0:11 0/1:2 G    | T                  | 0 |   |
| .     | .  | .   | .   | .     | .     | .     | .    | .                     | SOMGT:0:34 0/1:2 G    | A                  | 0 |   |
| .     | .  | .   | .   | .     | .     | .     | .    | .                     | SOMGT:0:37 0/1:2 A    | G                  | 0 |   |
| .     | .  | .   | .   | .     | .     | .     | .    | 0                     | DB;SOMGT:0:55 0/1:2 A | G                  | 0 |   |
| .     | .  | .   | .   | .     | .     | .     | .    | .                     | SOMGT:0:53 0/1:2 A    | C                  | 0 |   |
| ##### | ## | 0   | .   | .     | .     | .     | 1.89 | .                     | SOMGT:0:98 0/1:2 G    | A                  | 0 |   |
| .     | .  | .   | .   | .     | .     | .     | 2.87 | .                     | SOMGT:0:49 0/1:2 G    | T                  | 0 |   |
| .     | .  | 0.0 | 0.4 | 0.9,P | 1,D   |       | 6.2  | 4.76                  | SOMGT:0:12 0/1:2 G    | A                  | 0 |   |
| .     | .  | .   | .   | .     | .     | .     | 5.7  | .                     | SOMGT:0:20 0/1:2 G    | A                  | 0 |   |
| .     | .  | 0.0 | 0.8 | 0.998 | 1.000 |       | 5.7  | 1.95                  | SOMGT:0:20 0/1:2 G    | T                  | 0 |   |
| .     | .  | .   | .   | .     | .     | .     | .    | .                     | SOMGT:0:91 0/1:2 C    | T                  | 0 |   |
| .     | .  | .   | .   | .     | .     | .     | .    | .                     | SOMGT:0:10 0/1:2 T    | C                  | 0 |   |
| .     | .  | .   | .   | .     | .     | .     | .    | .                     | SOMGT:0:52 0/1:2 T    | C                  | 0 |   |
| .     | .  | .   | .   | .     | .     | .     | 0.2  | 0.2                   | DB;SOMGT:0:36 0/1:2 C | T                  | 0 |   |
| .     | .  | .   | .   | .     | .     | .     | 0    | 0                     | SOMGT:0:8,(0/1:2 C    | T                  | 0 |   |
| .     | .  | 0.5 | 0.0 | 0.0,B | 0.999 |       | 2.9  | .                     | SOMGT:0:55 0/1:2 G    | A                  | 0 |   |
| .     | .  | .   | .   | .     | .     | .     | 2.2  | .                     | SOMGT:0:33 0/1:2 A    | G                  | 0 |   |
| ##### | ## | 0   | 0.2 | 0.9   | 0.999 | 1.000 | 5.7  | 4.26                  | SOMGT:0:52 0/1:2 C    | T                  | 0 |   |
| .     | .  | 0.0 | 1.0 | 1.0,D | 1,D   |       | 5.8  | 4.93                  | SOMGT:0:33 0/1:2 C    | T                  | 0 |   |
| .     | .  | .   | .   | .     | .     | .     | .    | .                     | SOMGT:0:39 0/1:2 A    | G                  | 0 |   |
| .     | .  | .   | .   | .     | .     | .     | 2.5  | .                     | SOMGT:0:34 0/1:2 G    | C                  | 0 |   |
| .     | .  | .   | .   | .     | .     | .     | .    | .                     | SOMGT:0:25 0/1:2 C    | A                  | 0 |   |
| .     | .  | .   | .   | .     | .     | .     | .    | .                     | SOMGT:0:31 0/1:2 C    | G                  | 0 |   |
| .     | .  | .   | .   | .     | .     | .     | .    | .                     | SOMGT:0:8,(0/1:2 C    | G                  | 0 |   |
| .     | .  | .   | .   | .     | .     | .     | 4.9  | 4.04                  | SOMGT:0:19 0/1:2 C    | T                  | 0 |   |
| .     | .  | .   | .   | .     | .     | .     | .    | .                     | SOMGT:0:34 0/1:2 A    | T                  | 0 |   |
| .     | .  | .   | .   | .     | .     | .     | 0.1  | 0                     | SOMGT:0:8,(0/1:2 G    | C                  | 0 |   |
| .     | .  | .   | .   | .     | .     | .     | .    | .                     | SOMGT:0:12 0/1:2 G    | C                  | 0 |   |
| .     | .  | .   | .   | .     | .     | .     | .    | .                     | SOMGT:0:17 0/1:2 C    | G                  | 0 |   |
| .     | .  | .   | .   | .     | .     | .     | .    | .                     | SOMGT:0:11 0/1:2 C    | A                  | 0 |   |
| .     | .  | 0.1 | 0.4 | 0.876 | 1.000 |       | 5.7  | 2.17                  | SOMGT:0:21 0/1:2 T    | C                  | 0 |   |
| .     | .  | .   | .   | .     | .     | .     | .    | .                     | SOMGT:0:54 0/1:2 G    | A                  | 0 |   |
| .     | .  | .   | .   | .     | .     | .     | 2.3  | .                     | SOMGT:0:23 0/1:2 T    | G                  | 0 |   |
| .     | .  | .   | .   | .     | .     | .     | 4.6  | 1.39                  | SOMGT:0:10 0/1:2 G    | A                  | 0 |   |
| .     | .  | .   | .   | .     | .     | .     | .    | .                     | SOMGT:0:26 0/1:2 T    | A                  | 0 |   |

|       |    |     |      |       |       |      |      |       |                  |                     |   |   |
|-------|----|-----|------|-------|-------|------|------|-------|------------------|---------------------|---|---|
|       |    | 0.0 | 0.9  | 1.0,D | 1,D   | 4.7  | 4.84 |       | SOMGT:0:15 0/1:G | C                   | 0 |   |
|       |    |     |      |       |       |      |      | 0     | SOMGT:0:16 0/1:C | T                   | 0 |   |
|       |    |     |      |       |       | 5    |      |       | SOMGT:0:27 0/1:G | A                   | 0 |   |
|       |    |     |      |       |       |      |      |       | SOMGT:0:43 0/1:G | A                   | 0 |   |
|       |    | 0.0 | 0.9  | 1.0,D | 1,D   | 3.8  | 5.83 |       | SOMGT:0:11 0/1:G | C                   | 0 |   |
|       |    |     |      |       |       |      |      |       | SOMGT:0:21 0/1:T | C                   | 0 |   |
|       |    |     |      |       |       |      |      |       | SOMGT:0:36 0/1:G | C                   | 0 |   |
|       |    |     |      |       |       |      |      |       | SOMGT:0:14 0/1:C | T                   | 0 |   |
|       |    | 0.0 | 0.50 | 0.937 |       | 5.8  | 2.26 |       | SOMGT:0:59 0/1:C | T                   | 0 |   |
|       |    | 0.0 | 0.2  | 0.957 | 1,D   | 5.9  | 5.10 |       | SOMGT:0:21 0/1:C | T                   | 0 |   |
|       |    | 0.0 | 1.0  | 1.0,D | 1.00  | 5.7  | 5.01 |       | SOMGT:0:14 0/1:C | T                   | 0 |   |
|       |    |     |      |       |       |      |      | 0 0.1 | SOMGT:0:8,0/1:G  | A                   | 0 |   |
| ##### | ## | 0   |      |       |       | 4.5  | 2.74 |       | SOMGT:0:82 0/1:C | T                   | 0 |   |
|       |    |     |      |       |       |      |      |       | SOMGT:0:10 0/1:G | A                   | 0 |   |
| ##### | ## | 0   | 0.0  | 0.9   | 1.0,D | 1.00 | 5.6  | 4.24  | SOMGT:0:19 0/1:C | T                   | 0 |   |
|       |    |     |      |       |       |      |      |       | SOMGT:0:29 0/1:C | T                   | 0 |   |
|       |    |     |      |       |       | 4.6  |      |       | SOMGT:0:15 0/1:A | T                   | 0 |   |
|       |    |     |      |       |       |      |      |       | SOMGT:0:17 0/1:A | G                   | 0 |   |
|       |    |     |      |       | 1,A   | 5.5  | 6.00 |       | SOMGT:0:28 0/1:T | A                   | 0 |   |
|       |    |     |      |       |       |      |      |       | SOMGT:0:30 0/1:T | G                   | 0 |   |
|       |    |     |      |       |       |      |      | 0     | SOMGT:0:9,0/1:A  | C                   | 0 |   |
|       |    |     |      |       |       |      |      | 0     | SOMGT:0:25 0/1:A | C                   | 0 |   |
|       |    |     |      |       |       |      |      |       | SOMGT:0:19 0/1:C | T                   | 0 |   |
|       |    |     |      |       |       |      |      |       | SOMGT:0:31 0/1:T | A                   | 0 |   |
|       |    |     |      |       |       |      |      |       | SOMGT:0:9,0/1:C  | T                   | 0 |   |
| ##### | ## | 0   |      |       |       |      |      |       | SOMGT:0:58 0/1:C | T                   | 0 |   |
|       |    |     |      |       |       |      |      |       | SOMGT:0:21 0/1:C | T                   | 0 |   |
|       |    |     |      |       | 1,D   | 5.6  | 6.86 |       | SOMGT:0:38 0/1:G | A                   | 0 |   |
|       |    |     |      |       |       |      |      |       | SOMGT:0:59 0/1:G | A                   | 0 |   |
|       |    |     |      |       |       |      |      |       | SOMGT:0:76 0/1:A | C                   | 0 |   |
|       |    | 0.0 | 0.9  | 1.0,D | 0.957 | 4.9  | 3.23 |       | SOMGT:0:40 0/1:G | C                   | 0 |   |
|       |    |     |      |       |       |      |      |       | SOMGT:0:42 0/1:T | C                   | 0 |   |
|       |    |     |      |       |       | 1.39 |      |       | SOMGT:0:17 0/1:G | A                   | 0 |   |
|       | ## | 0   | 0.0  | 0.7   | 0.98  | 1,D  | 2.5  | 3.43  | 0                | SOMGT:0:59 0/1:C    | T | 0 |
|       | ## | 0   |      |       |       |      |      |       | SOMGT:0:29 0/1:C | T                   | 0 |   |
|       |    | 0.3 | 0.0  | 0.05  | 0.991 | 4.9  | 1.32 |       | SOMGT:0:63 0/1:T | C                   | 0 |   |
|       | 0  | 0   |      |       |       | 4    | 1.94 | 0.1   | 0                | DB;SOMGT:0:43 0/1:A | G | 0 |
|       |    |     |      |       |       |      |      | 0     | SOMGT:0:57 0/1:G | A                   | 0 |   |
|       |    | 0.1 | 0.4  | 0.392 | 0.867 | 3.2  | 2.29 |       | SOMGT:0:15 0/1:C | G                   | 0 |   |
|       | ## | 0   | 0.0  | 0.9   | 0.99  | 1,D  | 5.8  | 4.07  | 0                | SOMGT:0:40 0/1:C    | T | 0 |
|       | 0  | 0   |      |       |       | 1.62 |      |       | SOMGT:0:16 0/1:A | C                   | 0 |   |
|       | 0  | 0   |      |       |       |      |      | 0     | SOMGT:0:43 0/1:C | G                   | 0 |   |
|       |    |     |      |       |       |      |      |       | SOMGT:0:18 0/1:G | A                   | 0 |   |
|       |    |     |      |       |       |      |      |       | SOMGT:0:15 0/1:C | T                   | 0 |   |
|       |    |     |      |       |       |      |      | 0     | SOMGT:0:39 0/1:T | A                   | 0 |   |
|       |    |     |      |       |       |      |      | 0     | 0                | SOMGT:0:38 0/1:A    | G | 0 |
|       |    | 0.1 | 0.8  | 0.99  | 0.99  | 2.8  | 2.64 |       | SOMGT:0:75 0/1:C | T                   | 0 |   |
|       |    |     |      |       |       |      |      | 0     | SOMGT:0:37 0/1:A | T                   | 0 |   |
|       | ## | 0   |      |       |       |      |      |       | SOMGT:0:78 0/1:C | T                   | 0 |   |
| ##### | ## | 0   |      |       |       |      |      | 0     | 0                | SOMGT:0:10 0/1:G    | A | 0 |
|       |    |     |      |       |       | 1.69 |      |       | SOMGT:0:39 0/1:T | C                   | 0 |   |
|       |    |     |      |       |       |      |      | 0     | SOMGT:0:90 0/1:C | T                   | 0 |   |
|       |    |     |      |       |       | 2    | 1.99 |       | SOMGT:0:19 0/1:C | G                   | 0 |   |
|       |    |     |      |       |       |      |      |       | SOMGT:0:11 0/1:G | A                   | 0 |   |

|       |    |   |     |     |       |      |       |      |                     |                    |                     |   |   |
|-------|----|---|-----|-----|-------|------|-------|------|---------------------|--------------------|---------------------|---|---|
| 0     | 0  |   |     |     |       |      |       |      | SOMGT:0:14 0/1:3 T  | C                  | 0                   |   |   |
|       |    |   |     |     |       |      |       |      | SOMGT:0:34 0/1:5 C  | T                  | 0                   |   |   |
| 4E-04 | ## | 0 |     |     |       |      |       |      | DB;3GT:0:21 0/1:4 C | T                  | 0                   |   |   |
|       |    |   |     |     |       |      |       |      | SOMGT:0:11 0/1:2 G  | A                  | 0                   |   |   |
|       | ## | 0 |     |     |       |      |       |      | SOMGT:0:19 0/1:3 G  | A                  | 0                   |   |   |
|       |    |   |     |     |       |      |       |      | SOMGT:0:14 0/1:2 C  | T                  | 0                   |   |   |
| ##### | ## | 0 | 0.7 | 0.0 | 0.59  | 1,N  |       |      | SOMGT:0:25 0/1:1 C  | T                  | 0                   |   |   |
|       |    |   |     |     |       |      |       |      | SOMGT:0:45 0/1:3 C  | G                  | 0                   |   |   |
|       |    |   |     |     |       |      |       |      | SOMGT:0:44 0/1:3 C  | G                  | 0                   |   |   |
|       |    |   |     |     |       |      |       |      | SOMGT:0:49 0/1:3 C  | T                  | 0                   |   |   |
|       |    |   |     |     |       |      |       |      | SOMGT:0:47 0/1:4 C  | T                  | 0                   |   |   |
|       |    |   |     |     |       |      |       |      | SOMGT:0:28 0/1:2 A  | C                  | 0                   |   |   |
|       |    |   |     |     |       |      | 3.5   | 2.39 | 0                   | SOMGT:0:65 0/1:1 C | T                   | 0 |   |
|       |    |   |     |     |       |      | 3.8   | 2.10 |                     | SOMGT:0:44 0/1:3 G | A                   | 0 |   |
|       |    |   |     |     |       |      |       |      |                     | SOMGT:0:66 0/1:3 G | A                   | 0 |   |
|       |    |   |     |     |       |      |       |      |                     | SOMGT:0:62 0/1:3 G | T                   | 0 |   |
|       |    |   |     |     |       |      |       |      |                     | SOMGT:0:8,0/1:1 C  | A                   | 0 |   |
|       |    |   | 0.9 | 1.0 | D     | 1,D  | 4.3   | 3.43 |                     | SOMGT:0:36 0/1:3 C | T                   | 0 |   |
|       |    |   | 0.1 | 0.0 | 0.01  | 1,N  | 1.37  |      |                     | SOMGT:0:60 0/1:1 A | C                   | 0 |   |
|       |    |   |     |     |       |      |       |      |                     | SOMGT:0:20 0/1:2 C | A                   | 0 |   |
|       |    |   |     |     |       |      |       |      |                     | SOMGT:0:35 0/1:1 G | C                   | 0 |   |
|       |    |   |     |     |       | 1,D  | 4.7   | 11.6 |                     | SOMGT:0:83 0/1:1 G | A                   | 0 |   |
|       |    |   | 0.0 | 0.7 | 0.97  | 1,N  | 5.1   | 3.83 |                     | SOMGT:0:92 0/1:1 G | A                   | 0 |   |
|       |    |   |     |     |       | 1,D  |       |      |                     | SOMGT:0:11 0/1:2 C | T                   | 0 |   |
|       |    |   |     |     |       |      |       |      |                     | SOMGT:0:36 0/1:3 C | A                   | 0 |   |
|       |    |   |     |     |       |      |       |      |                     | SOMGT:0:52 0/1:2 C | A                   | 0 |   |
|       | 0  | 0 | 0.0 | 0.9 | 0.99  | 1.00 | 3     | 2.89 | 0                   | SOMGT:0:96 0/1:1 C | T                   | 0 |   |
|       |    |   |     |     |       |      |       |      | 0                   | SOMGT:0:9,0/1:3 G  | A                   | 0 |   |
|       |    |   |     |     |       |      |       |      | 0.2                 | 0                  | SOMGT:0:37 0/1:1 A  | G | 0 |
|       |    |   |     |     |       |      |       |      | 0                   | 0                  | SOMGT:0:12 0/1:2 A  | C | 0 |
|       |    |   |     |     |       |      |       |      |                     |                    | DB;3GT:0:30 0/1:1 C | T | 0 |
|       |    |   |     |     |       |      |       |      | 0.4                 | 0.4                | DB;3GT:0:52 0/1:1 A | G | 0 |
|       |    |   |     |     |       | 1,A  | 3.1   | 4.59 |                     |                    | SOMGT:0:17 0/1:2 C  | T | 0 |
|       |    |   | 0.1 | 0.0 | 0.104 | 0.94 | 5.4   | 2.06 |                     |                    | SOMGT:0:83 0/1:3 C  | T | 0 |
|       |    |   | 0.0 | 1.0 | 1.0   | D    | 0.964 | 3.8  | 2.70                |                    | SOMGT:0:44 0/1:1 G  | T | 0 |
|       |    |   |     |     |       |      |       |      |                     |                    | SOMGT:0:16 0/1:2 T  | A | 0 |
|       |    |   |     |     |       |      |       |      | 0.5                 | 0.5                | DB;3GT:0:53 0/1:1 T | C | 0 |
|       |    |   |     |     |       |      |       |      |                     |                    | SOMGT:0:39 0/1:1 T  | G | 0 |
|       |    |   |     |     |       |      | 3     |      | 0                   |                    | SOMGT:0:11 0/1:2 G  | A | 0 |
|       | 0  | 0 |     |     |       |      |       |      |                     |                    | SOMGT:0:15 0/1:2 C  | T | 0 |
|       |    |   |     |     |       |      | 4.6   |      |                     |                    | SOMGT:0:15 0/1:4 T  | A | 0 |
|       | ## | 0 |     |     |       |      |       |      |                     |                    | SOMGT:0:22 0/1:3 C  | T | 0 |
|       |    |   |     |     |       |      | 5.6   |      |                     |                    | SOMGT:0:23 0/1:3 C  | T | 0 |
|       |    |   |     |     |       |      |       |      | 0                   | 0                  | SOMGT:0:51 0/1:3 A  | T | 0 |
|       |    |   |     |     |       |      |       |      | 0.1                 | 0.1                | SOMGT:0:22 0/1:2 A  | C | 0 |
|       |    |   |     |     |       |      |       |      |                     |                    | SOMGT:0:94 0/1:1 C  | A | 0 |
|       |    |   |     |     |       |      |       |      |                     |                    | SOMGT:0:11 0/1:2 C  | T | 0 |
|       |    |   |     |     |       |      |       |      |                     |                    | SOMGT:0:50 0/1:3 C  | T | 0 |
|       |    |   |     |     |       |      |       |      |                     |                    | SOMGT:0:67 0/1:3 T  | G | 0 |
|       |    |   |     |     |       |      |       |      |                     |                    | SOMGT:0:11 0/1:1 G  | T | 0 |
|       |    |   |     |     |       |      |       |      |                     |                    | SOMGT:0:26 0/1:2 A  | T | 0 |
|       |    |   | 0.0 | 0.8 | 0.99  | 1.00 | 5.4   | 4.17 |                     |                    | SOMGT:0:36 0/1:2 G  | A | 0 |
|       |    |   |     |     |       |      |       |      |                     |                    | SOMGT:0:54 0/1:3 G  | A | 0 |
|       |    |   | 0.0 | 0.9 | 1.0   | D    | 1.00  | 5.1  | 3.49                |                    | SOMGT:0:22 0/1:3 C  | T | 0 |

|       |    |   |  |  |  |  |  |                          |                      |   |   |
|-------|----|---|--|--|--|--|--|--------------------------|----------------------|---|---|
|       |    |   |  |  |  |  |  |                          | SOMGT:0:22 0/1: C    | T | 0 |
|       |    |   |  |  |  |  |  |                          | SOMGT:0:48 0/1: C    | A | 0 |
|       |    |   |  |  |  |  |  |                          | SOMGT:0:56 0/1: G    | T | 0 |
|       |    |   |  |  |  |  |  |                          | SOMGT:0:37 0/1: G    | A | 0 |
|       |    |   |  |  |  |  |  | 0 0.1                    | SOMGT:0:9, (0/1: T   | C | 0 |
|       |    |   |  |  |  |  |  |                          | SOMGT:0:95 0/1: A    | T | 0 |
|       |    |   |  |  |  |  |  | 0 0.1                    | SOMGT:0:21 0/1: G    | T | 0 |
|       |    |   |  |  |  |  |  | 0 0                      | DB;SOMGT:0:45 0/1: G | T | 0 |
|       |    |   |  |  |  |  |  | 1.59.                    | SOMGT:0:12 0/1: A    | T | 0 |
|       |    |   |  |  |  |  |  |                          | SOMGT:0:46 0/1: G    | A | 0 |
|       |    |   |  |  |  |  |  | 3.5 2.23.                | SOMGT:0:28 0/1: C    | A | 0 |
|       |    |   |  |  |  |  |  |                          | SOMGT:0:68 0/1: C    | T | 0 |
|       |    |   |  |  |  |  |  |                          | SOMGT:0:43 0/1: C    | G | 0 |
|       |    |   |  |  |  |  |  | 0 0                      | SOMGT:0:12 0/1: G    | A | 0 |
|       |    |   |  |  |  |  |  | 4.7 3.12.                | SOMGT:0:17 0/1: G    | A | 0 |
|       |    |   |  |  |  |  |  |                          | SOMGT:0:8, (0/1: C   | G | 0 |
|       |    |   |  |  |  |  |  |                          | SOMGT:0:12 0/1: C    | G | 0 |
| 2E-04 | ## | 0 |  |  |  |  |  |                          | SOMGT:0:96 0/1: C    | T | 0 |
|       |    |   |  |  |  |  |  | 2.91.                    | SOMGT:0:80 0/1: T    | C | 0 |
|       |    |   |  |  |  |  |  | 0.4 (0.0 (0.002 1, D     | SOMGT:0:60 0/1: A    | G | 0 |
|       |    |   |  |  |  |  |  | 1.87.                    | SOMGT:0:31 0/1: T    | G | 0 |
|       |    |   |  |  |  |  |  | 1.92.                    | SOMGT:0:15 0/1: G    | A | 0 |
| 0.01  | 0  | 0 |  |  |  |  |  | 4.6 . 0                  | SOMGT:0:24 0/1: C    | T | 0 |
|       | ## | 0 |  |  |  |  |  | 0.0 (0.9 (0.991 1, D     | DB;SOMGT:0:28 0/1: G | A | 0 |
|       |    |   |  |  |  |  |  |                          | SOMGT:0:79 0/1: T    | G | 0 |
|       |    |   |  |  |  |  |  | 0                        | DB;SOMGT:0:55 0/1: C | T | 0 |
|       |    |   |  |  |  |  |  | 4.1 .                    | SOMGT:0:30 0/1: C    | T | 0 |
|       |    |   |  |  |  |  |  | 0                        | SOMGT:0:63 0/1: G    | A | 0 |
|       |    |   |  |  |  |  |  |                          | SOMGT:0:19 0/1: G    | T | 0 |
|       |    |   |  |  |  |  |  |                          | SOMGT:0:15 0/1: G    | C | 0 |
|       |    |   |  |  |  |  |  |                          | SOMGT:0:12 0/1: C    | G | 0 |
|       |    |   |  |  |  |  |  |                          | SOMGT:0:76 0/1: C    | T | 0 |
|       |    |   |  |  |  |  |  | 1, D                     | SOMGT:0:16 0/1: G    | A | 0 |
|       |    |   |  |  |  |  |  | 1.74.                    | SOMGT:0:91 0/1: G    | A | 0 |
|       |    |   |  |  |  |  |  |                          | SOMGT:0:17 0/1: A    | T | 0 |
|       | ## | 0 |  |  |  |  |  | 0.0, 0.9 (1.0, D 1, N    | SOMGT:0:25 0/1: C    | T | 0 |
|       |    |   |  |  |  |  |  |                          | SOMGT:0:68 0/1: C    | T | 0 |
|       |    |   |  |  |  |  |  | 1, A                     | SOMGT:0:79 0/1: G    | A | 0 |
| ##### | ## | 0 |  |  |  |  |  | 0.0 (0.9 (1.0, D 0.877   | SOMGT:0:12 0/1: C    | T | 0 |
|       |    |   |  |  |  |  |  |                          | SOMGT:0:20 0/1: C    | T | 0 |
|       |    |   |  |  |  |  |  | 0 0 0.0 0.8 (0.997 0.998 | SOMGT:0:27 0/1: T    | G | 0 |
| ##### | ## | 0 |  |  |  |  |  |                          | SOMGT:0:33 0/1: C    | T | 0 |
|       |    |   |  |  |  |  |  |                          | SOMGT:0:73 0/1: G    | A | 0 |
|       |    |   |  |  |  |  |  | 6 4.00.                  | SOMGT:0:62 0/1: G    | A | 0 |
| 2E-04 | 0  | 0 |  |  |  |  |  | 0.0 (1.0, 1.0, D 1.000   | SOMGT:0:23 0/1: G    | A | 0 |
|       |    |   |  |  |  |  |  | 0.1 0.1                  | SOMGT:0:12 0/1: G    | C | 0 |
|       | ## | 0 |  |  |  |  |  |                          | SOMGT:0:30 0/1: A    | G | 0 |
|       |    |   |  |  |  |  |  | 0.3 (0.0 (0.006 0.999.   | SOMGT:0:12 0/1: T    | C | 0 |
|       |    |   |  |  |  |  |  | 0.1 0                    | SOMGT:0:13 0/1: G    | A | 0 |
|       |    |   |  |  |  |  |  | 0 0                      | SOMGT:0:9, (0/1: C   | T | 0 |
|       |    |   |  |  |  |  |  |                          | SOMGT:0:20 0/1: C    | G | 0 |
|       |    |   |  |  |  |  |  |                          | SOMGT:0:86 0/1: C    | T | 0 |
|       |    |   |  |  |  |  |  | 0 0 0.1: .               | SOMGT:0:25 0/1: G    | A | 0 |
|       |    |   |  |  |  |  |  | 1, N                     | SOMGT:0:10 0/1: A    | C | 0 |

|       |    |     |       |       |       |       |      |      |     |                      |   |   |
|-------|----|-----|-------|-------|-------|-------|------|------|-----|----------------------|---|---|
| 0.017 | 0  | 0   | .     | .     | .     | 2.3   | 1.34 | 0    | 0   | SOMGT:0:89 0/1: A    | T | 0 |
| .     | .  | .   | .     | .     | .     | .     | .    | .    | .   | SOMGT:0:16 0/1: G    | A | 0 |
| .     | .  | .   | .     | .     | .     | .     | .    | .    | .   | SOMGT:0:23 0/1: G    | A | 0 |
| .     | 0  | 0   | .     | .     | .     | .     | .    | 0    | 0.2 | SOMGT:0:15 0/1: C    | A | 0 |
| .     | .  | .   | .     | .     | .     | .     | .    | 0    | .   | SOMGT:0:13 0/1: A    | C | 0 |
| .     | .  | .   | .     | .     | .     | .     | .    | .    | .   | SOMGT:0:16 0/1: T    | C | 0 |
| .     | .  | 0.0 | 0.9   | 1.0,D | 1,D   | 5.3   | 5.19 | .    | .   | SOMGT:0:15 0/1: G    | A | 0 |
| .     | .  | .   | .     | .     | .     | .     | .    | .    | .   | SOMGT:0:9,(0/1: G    | A | 0 |
| .     | .  | .   | .     | .     | .     | .     | .    | 0    | .   | SOMGT:0:11 0/1: A    | T | 0 |
| ##### | ## | 0   | 0.0   | 0.9   | 1.0,D | 1.000 | 4.8  | 4.42 | .   | SOMGT:0:61 0/1: C    | T | 0 |
| .     | .  | .   | .     | .     | .     | .     | .    | .    | .   | SOMGT:0:23 0/1: G    | A | 0 |
| .     | .  | .   | 1.0   | 1.0,D | .     | .     | 4.4  | 1.95 | .   | SOMGT:0:58 0/1: G    | A | 0 |
| .     | .  | .   | .     | .     | .     | .     | 5.6  | .    | .   | SOMGT:0:21 0/1: G    | T | 0 |
| .     | .  | .   | .     | .     | .     | .     | 1.54 | .    | .   | SOMGT:0:8,(0/1: T    | C | 0 |
| .     | .  | .   | .     | .     | .     | .     | .    | 0    | .   | SOMGT:0:10 0/1: G    | T | 0 |
| .     | ## | 0   | .     | .     | .     | .     | .    | .    | .   | SOMGT:0:37 0/1: G    | A | 0 |
| .     | .  | 0.4 | 0.8   | 0.82  | 1,D   | 6.1   | 3.43 | .    | .   | SOMGT:0:17 0/1: A    | G | 0 |
| .     | .  | .   | .     | .     | .     | .     | .    | .    | .   | SOMGT:0:27 0/1: G    | A | 0 |
| .     | .  | 0.0 | 0.0   | 0.002 | 1,D   | 6     | 4.31 | .    | .   | SOMGT:0:45 0/1: G    | T | 0 |
| .     | .  | .   | .     | .     | .     | .     | .    | 0.1  | 0.3 | DB;SOMGT:0:26 0/1: G | A | 0 |
| .     | .  | .   | .     | .     | .     | .     | .    | .    | .   | SOMGT:0:12 0/1: C    | T | 0 |
| .     | .  | .   | .     | .     | .     | .     | 1.27 | .    | .   | SOMGT:0:28 0/1: G    | C | 0 |
| .     | .  | .   | .     | .     | .     | .     | .    | .    | .   | SOMGT:0:11 0/1: G    | A | 0 |
| .     | ## | 0   | .     | .     | .     | .     | .    | .    | 0   | SOMGT:0:90 0/1: G    | A | 0 |
| .     | .  | .   | .     | .     | .     | .     | 2.4  | .    | .   | SOMGT:0:41 0/1: C    | T | 0 |
| .     | .  | .   | .     | .     | .     | .     | .    | .    | .   | SOMGT:0:68 0/1: G    | A | 0 |
| .     | .  | .   | .     | .     | .     | .     | .    | 0    | .   | SOMGT:0:23 0/1: T    | A | 0 |
| .     | .  | .   | .     | .     | .     | .     | .    | .    | .   | SOMGT:0:8,(0/1: C    | T | 0 |
| .     | .  | .   | .     | .     | .     | .     | .    | 0    | 0   | SOMGT:0:19 0/1: G    | T | 0 |
| .     | .  | .   | .     | .     | .     | .     | .    | 0    | .   | SOMGT:0:8,(0/1: A    | T | 0 |
| .     | .  | 0.9 | 1.0,D | .     | .     | 3.3   | 2.24 | .    | .   | SOMGT:0:11 0/1: G    | A | 0 |
| .     | .  | .   | .     | .     | .     | .     | .    | 0    | .   | SOMGT:0:46 0/1: C    | A | 0 |
| .     | .  | .   | .     | .     | .     | 3.8   | 1.25 | .    | .   | SOMGT:0:30 0/1: A    | T | 0 |
| .     | .  | .   | .     | .     | .     | 2.3   | 1.46 | .    | .   | SOMGT:0:68 0/1: G    | C | 0 |
| .     | ## | .   | .     | .     | .     | 1.76  | .    | 0    | .   | SOMGT:0:31 0/1: A    | G | 0 |
| .     | .  | 0.0 | 0.5   | 0.594 | 0.995 | 4.3   | 3.78 | .    | .   | SOMGT:0:39 0/1: G    | A | 0 |
| .     | .  | .   | .     | .     | .     | .     | .    | .    | .   | SOMGT:0:31 0/1: C    | G | 0 |
| .     | .  | .   | .     | .     | .     | 2.7   | .    | .    | .   | SOMGT:0:51 0/1: G    | A | 0 |
| .     | .  | .   | .     | .     | .     | .     | .    | .    | .   | SOMGT:0:20 0/1: C    | G | 0 |
| .     | .  | .   | .     | .     | .     | .     | .    | .    | .   | SOMGT:0:9,(0/1: C    | A | 0 |
| .     | .  | .   | .     | .     | .     | .     | .    | .    | .   | SOMGT:0:44 0/1: G    | A | 0 |
| .     | .  | .   | .     | .     | .     | .     | .    | 0.1  | 0.2 | SOMGT:0:34 0/1: C    | A | 0 |
| .     | .  | .   | .     | .     | .     | .     | .    | 0    | 0   | SOMGT:0:48 0/1: C    | A | 0 |
| .     | ## | 0   | 0.0   | 0.0   | 0.003 | 1,N   | 4.5  | 1.47 | .   | SOMGT:0:19 0/1: C    | T | 0 |
| .     | ## | .   | .     | .     | .     | .     | .    | .    | .   | DB;SOMGT:0:93 0/1: C | T | 0 |
| .     | .  | .   | 1,D   | 6     | 3.52  | .     | .    | .    | .   | SOMGT:0:51 0/1: C    | A | 0 |
| .     | .  | 0.0 | 1.0   | 1.0,D | 1,D   | 5.5   | 3.84 | .    | .   | SOMGT:0:89 0/1: T    | G | 0 |
| .     | .  | .   | .     | .     | .     | .     | .    | 0    | 0.1 | DB;SOMGT:0:20 0/1: T | C | 0 |
| .     | .  | 0.6 | 0.0   | 0.071 | 1.000 | 5.8   | 1.48 | .    | .   | SOMGT:0:34 0/1: T    | C | 0 |
| .     | .  | .   | .     | .     | .     | .     | .    | .    | .   | SOMGT:0:70 0/1: G    | A | 0 |
| .     | .  | 0.0 | 1.0   | 1.0,D | 1,D   | 5.6   | 5.71 | .    | .   | SOMGT:0:44 0/1: G    | A | 0 |
| .     | .  | .   | .     | .     | .     | .     | .    | .    | .   | SOMGT:0:91 0/1: G    | T | 0 |
| .     | .  | .   | .     | .     | .     | 1.33  | .    | .    | .   | SOMGT:0:8,(0/1: T    | C | 0 |
| .     | .  | .   | .     | .     | .     | .     | .    | .    | .   | SOMGT:0:26 0/1: A    | T | 0 |

|       |    |     |     |       |       |      |      |                           |   |   |
|-------|----|-----|-----|-------|-------|------|------|---------------------------|---|---|
|       |    | 0.0 | 0.0 | 0.006 | 1,N   | 1.70 |      | SOMGT:0:30 0/1:2 C        | T | 0 |
| 2E-04 | ## | 0   |     |       |       |      |      | SOMGT:0:74 0/1:3 C        | T | 0 |
|       |    | 0.0 | 0.5 | 0.73  | 1,D   | 5.8  | 5.49 | SOMGT:0:23 0/1:2 C        | G | 0 |
|       |    |     |     |       |       | 4.49 | 0    | 0 DB;SOMGT:0:63 0/1:3 G   | A | 0 |
|       | ## | 0   | 0.0 | 0.9   | 0.99  | 5.6  | 4.76 | SOMGT:0:21 0/1:2 G        | A | 0 |
|       | ## | 0   |     |       | 1,A   | 5.58 |      | SOMGT:0:56 0/1:3 C        | T | 0 |
|       |    |     |     |       |       |      |      | SOMGT:0:13 0/1:1 G        | A | 0 |
|       | ## | 0   |     |       |       |      | 0    | SOMGT:0:51 0/1:3 G        | A | 0 |
|       |    |     |     |       |       | 3.9  | 1.88 | SOMGT:0:46 0/1:3 A        | G | 0 |
|       |    |     |     |       |       |      |      | SOMGT:0:45 0/1:3 G        | T | 0 |
| 0.011 | 0  | 0   |     |       |       | 2.5  |      | DB;SOMGT:0:12 0/1:2 C     | T | 0 |
|       | ## | 0   |     |       |       |      | 0.1  | 0.2 DB;SOMGT:0:22 0/1:3 T | A | 0 |
|       |    |     |     |       |       |      |      | SOMGT:0:29 0/1:3 C        | G | 0 |
|       |    |     |     |       |       |      |      | SOMGT:0:50 0/1:3 G        | A | 0 |
|       |    |     |     |       |       |      | 0    | 0 SOMGT:0:13 0/1:1 G      | A | 0 |
|       |    |     |     |       |       |      |      | SOMGT:0:10 0/1:3 C        | T | 0 |
|       |    |     |     |       |       | 2.9  |      | SOMGT:0:46 0/1:3 C        | T | 0 |
|       |    |     |     |       |       |      |      | SOMGT:0:54 0/1:3 G        | A | 0 |
|       |    |     |     |       |       |      |      | SOMGT:0:21 0/1:3 A        | G | 0 |
|       |    |     |     |       |       |      |      | SOMGT:0:35 0/1:3 G        | A | 0 |
|       |    |     |     |       |       |      |      | SOMGT:0:66 0/1:3 C        | G | 0 |
|       |    |     |     |       |       |      |      | SOMGT:0:21 0/1:2 G        | A | 0 |
|       |    |     |     |       |       |      |      | SOMGT:0:36 0/1:3 A        | C | 0 |
|       |    |     |     |       |       |      |      | SOMGT:0:38 0/1:3 C        | T | 0 |
|       |    |     |     |       |       |      | 0    | SOMGT:0:23 0/1:2 C        | G | 0 |
|       |    |     |     |       |       |      |      | SOMGT:0:61 0/1:3 G        | A | 0 |
|       |    |     |     |       |       | 1.50 |      | SOMGT:0:53 0/1:3 C        | T | 0 |
|       |    |     |     |       | 1,A   |      |      | SOMGT:0:26 0/1:3 G        | A | 0 |
|       |    |     |     |       |       | 1.84 |      | DB;SOMGT:0:21 0/1:2 T     | A | 0 |
|       |    |     |     |       |       |      |      | SOMGT:0:43 0/1:3 G        | A | 0 |
|       |    |     |     |       |       |      | 0    | 0.1 SOMGT:0:14 0/1:2 C    | G | 0 |
|       |    |     |     |       |       |      | 0.1  | 0.1 SOMGT:0:12 0/1:1 C    | A | 0 |
|       |    |     |     |       |       |      | 0    | 0 SOMGT:0:17 0/1:3 T      | C | 0 |
|       |    |     |     |       |       |      |      | SOMGT:0:8,(0/1:3 G        | T | 0 |
|       | ## | 0   |     |       |       | 1.27 |      | SOMGT:0:34 0/1:2 C        | T | 0 |
|       |    |     |     |       |       | 3.3  | 3.26 | SOMGT:0:90 0/1:1 C        | T | 0 |
|       |    | 0.0 | 0.9 | 0.99  | 1,D   | 4.9  | 5.51 | SOMGT:0:89 0/1:1 G        | A | 0 |
|       |    | 0.0 | 0.9 | 1.0   | D 1,D | 4.2  | 3.76 | SOMGT:0:10 0/1:1 G        | A | 0 |
|       |    |     |     |       |       |      | 0.1  | 0.2 SOMGT:0:8,(0/1:2 G    | A | 0 |
|       |    |     |     |       |       |      | 0    | 0.1 SOMGT:0:34 0/1:2 A    | G | 0 |
|       |    |     |     |       |       |      |      | SOMGT:0:50 0/1:3 C        | A | 0 |
|       |    |     |     |       |       |      |      | SOMGT:0:80 0/1:3 T        | C | 0 |
|       | ## | 0   | 0.0 | 0.1   | 0.95  | 3.7  | 1.71 | SOMGT:0:63 0/1:1 C        | T | 0 |
|       |    |     |     |       |       |      |      | SOMGT:0:42 0/1:2 C        | T | 0 |
|       |    |     |     |       |       |      |      | SOMGT:0:16 0/1:3 C        | T | 0 |
|       |    |     |     |       |       |      | 0    | 0 SOMGT:0:20 0/1:3 T      | C | 0 |
|       |    | 0.0 | 1.0 | 1.0   | D 1,D | 5.2  | 4.19 | SOMGT:0:48 0/1:2 C        | T | 0 |
|       |    |     |     |       |       |      |      | SOMGT:0:45 0/1:2 G        | A | 0 |
|       |    |     |     |       |       |      |      | SOMGT:0:26 0/1:2 C        | T | 0 |
|       |    |     |     |       |       |      |      | SOMGT:0:46 0/1:3 C        | T | 0 |
|       |    |     |     |       |       |      | 0    | SOMGT:0:10 0/1:1 G        | A | 0 |
|       |    | 0.1 | 0.9 | 0.99  | 1,N   | 4    | 3.15 | SOMGT:0:15 0/1:2 C        | T | 0 |
| 2E-04 | ## | 0   |     |       |       |      | 0    | SOMGT:0:14 0/1:2 G        | A | 0 |
|       |    |     |     |       | 1,A   | 4.8  | 8.04 | SOMGT:0:32 0/1:3 T        | A | 0 |

|       |   |     |     |       |       |       |          |                           |   |   |
|-------|---|-----|-----|-------|-------|-------|----------|---------------------------|---|---|
| ##    | 0 | .   | .   | .     | .     | 1.66  | .        | SOMGT:0:18 0/1:4 C        | T | 0 |
| ##    | 0 | .   | .   | .     | .     | .     | .        | SOMGT:0:29 0/1:3 G        | A | 0 |
| .     | . | .   | .   | .     | .     | 1.72  | .        | SOMGT:0:16 0/1:3 G        | A | 0 |
| .     | . | 0.6 | 0.0 | 0.001 | 0.987 | 3.8   | 1.70     | SOMGT:0:33 0/1:4 G        | T | 0 |
| .     | . | .   | .   | .     | .     | .     | .        | SOMGT:0:24 0/1:6 G        | C | 0 |
| .     | . | .   | .   | .     | .     | .     | .        | SOMGT:0:34 0/1:4 G        | T | 0 |
| .     | . | 0.0 | 0.9 | 0.999 | 1,D   | 4.2   | 5.24     | SOMGT:0:22 0/1:2 G        | A | 0 |
| .     | . | .   | .   | .     | .     | .     | .        | 0 0 DB;SOMGT:0:25 0/1:3 T | G | 0 |
| .     | . | .   | .   | .     | .     | .     | .        | 0 0 SOMGT:0:27 0/1:4 C    | T | 0 |
| .     | . | .   | .   | .     | .     | .     | 0.1 0.3  | SOMGT:0:9,(0/1:3 C        | T | 0 |
| .     | . | .   | .   | .     | .     | .     | .        | 0 0 SOMGT:0:10 0/1:3 A    | G | 0 |
| .     | . | .   | .   | .     | .     | .     | .        | SOMGT:0:35 0/1:4 G        | T | 0 |
| .     | . | .   | .   | .     | .     | 1.68  | 0        | SOMGT:0:22 0/1:7 T        | G | 0 |
| ##    | 0 | .   | .   | .     | .     | .     | .        | SOMGT:0:31 0/1:3 C        | T | 0 |
| ##    | 0 | 0.0 | 1.0 | 1.0   | D 1,D | 2.7   | 3.85     | SOMGT:0:23 0/1:4 C        | T | 0 |
| .     | . | .   | .   | .     | .     | 4.5   | .        | SOMGT:0:12 0/1:7 G        | A | 0 |
| .     | . | .   | .   | .     | .     | 1.48  | .        | SOMGT:0:78 0/1:9 A        | C | 0 |
| ##    | 0 | .   | .   | .     | .     | .     | .        | SOMGT:0:23 0/1:2 C        | T | 0 |
| 0.011 | 0 | 0   | 0.0 | 0.1   | 0.899 | 0.999 | 4 3.11   | 0 DB;SOMGT:0:16 0/1:7 C   | T | 0 |
| .     | . | .   | .   | .     | .     | .     | .        | SOMGT:0:35 0/1:9 A        | G | 0 |
| .     | . | .   | .   | .     | .     | .     | .        | SOMGT:0:41 0/1:7 C        | A | 0 |
| .     | . | 0.0 | 0.9 | 1.0   | D 1,D | 5.7   | 5.49     | SOMGT:0:34 0/1:7 C        | T | 0 |
| .     | . | 0.2 | 0.0 | 0.001 | 1.000 | .     | .        | SOMGT:0:56 0/1:4 T        | A | 0 |
| .     | . | 0.0 | 0.9 | 1.0   | D 1,D | 5.8   | 4.83     | SOMGT:0:17 0/1:7 C        | T | 0 |
| .     | . | .   | .   | .     | .     | .     | .        | DB;SOMGT:0:25 0/1:2 T     | C | 0 |
| .     | . | .   | .   | .     | .     | .     | .        | 0 SOMGT:0:27 0/1:3 A      | G | 0 |
| .     | . | .   | .   | .     | .     | 3.4   | .        | SOMGT:0:26 0/1:3 C        | G | 0 |
| .     | . | .   | .   | .     | .     | .     | .        | SOMGT:0:18 0/1:2 T        | G | 0 |
| .     | . | .   | .   | .     | .     | .     | .        | 0 0.1 SOMGT:0:9,(0/1:7 G  | A | 0 |
| .     | . | .   | .   | .     | .     | .     | .        | SOMGT:0:25 0/1:8 G        | C | 0 |
| .     | . | .   | .   | .     | .     | 2.50  | .        | SOMGT:0:11 0/1:7 G        | A | 0 |
| .     | . | 0.0 | 0.9 | 0.997 | 1.000 | 5.9   | 4.12     | SOMGT:0:62 0/1:7 G        | A | 0 |
| .     | . | .   | .   | .     | .     | 4.1   | .        | SOMGT:0:45 0/1:3 G        | C | 0 |
| .     | . | .   | .   | .     | .     | 2.7   | 2.12     | SOMGT:0:79 0/1:8 C        | A | 0 |
| .     | . | .   | .   | .     | .     | 2.5   | .        | SOMGT:0:12 0/1:2 T        | A | 0 |
| .     | . | 1.0 | 0.0 | 0.0   | B 1,N | .     | .        | SOMGT:0:31 0/1:3 G        | T | 0 |
| ##    | 0 | 0.0 | 0.0 | 0.313 | 0.999 | 2.5   | 2.21     | SOMGT:0:14 0/1:7 C        | T | 0 |
| .     | . | .   | .   | .     | .     | 2.3   | 1.83     | SOMGT:0:28 0/1:2 T        | A | 0 |
| .     | . | 0.0 | 0.0 | 0.665 | 1.000 | 4.9   | 1.86     | SOMGT:0:14 0/1:7 G        | A | 0 |
| .     | . | .   | .   | .     | .     | .     | .        | 0 0 DB;SOMGT:0:26 0/1:7 T | C | 0 |
| .     | . | .   | .   | .     | .     | .     | .        | SOMGT:0:40 0/1:3 C        | G | 0 |
| .     | . | .   | .   | .     | .     | .     | .        | SOMGT:0:31 0/1:3 G        | C | 0 |
| .     | . | .   | .   | .     | .     | 5     | .        | SOMGT:0:16 0/1:7 C        | T | 0 |
| .     | . | 0.0 | .   | .     | 0.982 | 2.98  | .        | SOMGT:0:14 0/1:7 A        | T | 0 |
| .     | . | 0.9 | 0.9 | 0.999 | 1.000 | 5.8   | 1.57     | SOMGT:0:76 0/1:8 T        | C | 0 |
| .     | . | .   | .   | .     | .     | .     | .        | SOMGT:0:70 0/1:7 T        | C | 0 |
| .     | . | .   | .   | .     | .     | 1,A   | 5.9 13.3 | SOMGT:0:43 0/1:3 G        | A | 0 |
| .     | . | .   | .   | .     | .     | 1,D   | 2.38     | SOMGT:0:48 0/1:6 C        | T | 0 |
| .     | . | .   | .   | .     | .     | .     | .        | SOMGT:0:53 0/1:7 C        | T | 0 |
| .     | . | .   | .   | .     | .     | 1.26  | 0        | SOMGT:0:10 0/1:2 A        | C | 0 |
| .     | . | .   | .   | .     | .     | .     | 0.3 0.2  | SOMGT:0:8,(0/1:2 G        | A | 0 |
| .     | . | .   | .   | .     | .     | 2.1   | .        | SOMGT:0:20 0/1:7 G        | A | 0 |
| .     | . | .   | .   | .     | .     | .     | .        | 0 DB;SOMGT:0:19 0/1:2 T   | A | 0 |
| .     | . | .   | .   | .     | .     | .     | .        | SOMGT:0:35 0/1:3 C        | A | 0 |

|   |    |   |     |     |       |       |      |      |     |                   |   |   |
|---|----|---|-----|-----|-------|-------|------|------|-----|-------------------|---|---|
| . | ## | 0 | 0.9 | 0.0 | 0.025 | 0.975 | 4.8  | .    | .   | SOMGT:0:48 0/1:7A | G | 0 |
| . | .  | . | .   | .   | .     | .     | .    | .    | .   | SOMGT:0:27 0/1:7G | A | 0 |
| . | ## | 0 | 0.1 | 0.0 | 0.015 | 1,N   | .    | .    | .   | SOMGT:0:52 0/1:7C | T | 0 |
| . | .  | . | .   | .   | .     | .     | .    | .    | .   | SOMGT:0:53 0/1:7C | A | 0 |
| . | .  | . | .   | .   | .     | .     | 3.00 | .    | .   | SOMGT:0:11 0/1:7C | T | 0 |
| . | .  | . | .   | .   | .     | .     | .    | .    | .   | SOMGT:0:81 0/1:7C | T | 0 |
| . | .  | . | .   | .   | .     | .     | .    | .    | .   | SOMGT:0:22 0/1:7G | A | 0 |
| . | ## | 0 | 0.1 | 0.1 | 0.205 | 1.000 | 5.1  | 3.30 | .   | SOMGT:0:57 0/1:7G | A | 0 |
| . | .  | . | .   | .   | .     | .     | 3.7  | .    | .   | SOMGT:0:14 0/1:7C | T | 0 |
| . | .  | . | 0.2 | 0.0 | 0.358 | 1,N   | .    | .    | .   | SOMGT:0:17 0/1:7T | G | 0 |
| . | .  | . | .   | .   | .     | .     | .    | .    | .   | SOMGT:0:19 0/1:7A | G | 0 |
| . | .  | . | 0.0 | 0.8 | 0.983 | 0.886 | 4.2  | 3.66 | .   | SOMGT:0:11 0/1:7C | T | 0 |
| . | .  | . | .   | .   | .     | .     | .    | 0.1  | 0.2 | SOMGT:0:37 0/1:7C | A | 0 |
| . | .  | . | .   | .   | .     | .     | .    | 0    | 0.1 | SOMGT:0:15 0/1:7G | T | 0 |
| . | .  | . | 0.0 | .   | .     | 1,D   | 4.6  | 1.63 | .   | SOMGT:0:58 0/1:7G | A | 0 |
| . | .  | . | 0.0 | 0.5 | 0.927 | 1.000 | 5.1  | 4.23 | .   | SOMGT:0:32 0/1:7C | G | 0 |
| . | ## | 0 | 0.2 | 0.0 | 0.012 | 1,N   | .    | .    | .   | SOMGT:0:19 0/1:7C | T | 0 |
| . | .  | . | .   | .   | .     | .     | .    | .    | .   | SOMGT:0:44 0/1:7G | C | 0 |
| . | .  | . | .   | .   | .     | .     | .    | 0.1  | 0.2 | SOMGT:0:23 0/1:7C | A | 0 |
| . | .  | . | .   | .   | .     | .     | .    | 0.3  | 0.6 | SOMGT:0:9,0/1:7A  | C | 0 |
| . | 0  | 0 | .   | .   | .     | .     | 3.2  | 2.71 | .   | SOMGT:0:28 0/1:7C | T | 0 |
| . | .  | . | 0.0 | 0.9 | 0.995 | 0.997 | 4.6  | 2.87 | .   | SOMGT:0:11 0/1:7C | A | 0 |
| . | .  | . | .   | .   | .     | .     | .    | .    | .   | SOMGT:0:9,0/1:7A  | T | 0 |
| . | .  | . | .   | .   | .     | .     | 3.11 | .    | .   | SOMGT:0:28 0/1:7G | T | 0 |
| . | .  | . | .   | .   | .     | .     | .    | .    | .   | SOMGT:0:29 0/1:7G | A | 0 |
| . | .  | . | .   | .   | .     | .     | 3.37 | .    | .   | SOMGT:0:10 0/1:7G | A | 0 |
| . | .  | . | 0.0 | 0.4 | 0.883 | 1.000 | 4.7  | 4.04 | .   | SOMGT:0:38 0/1:7C | G | 0 |
| . | ## | . | 0.3 | 0.0 | 0.002 | 0.974 | .    | 1.77 | .   | SOMGT:0:40 0/1:7G | C | 0 |
| . | ## | 0 | 0.1 | 0.0 | 0.087 | 0.985 | 4.1  | 1.73 | .   | SOMGT:0:83 0/1:7C | T | 0 |
| . | .  | . | 0.0 | 0.9 | 0.995 | 1.000 | 4.1  | 4.31 | .   | SOMGT:0:13 0/1:7G | A | 0 |
| . | .  | . | 0.0 | 0.9 | 1.0,D | 1,D   | 4.8  | 5.03 | .   | SOMGT:0:20 0/1:7C | T | 0 |
| . | .  | . | .   | .   | .     | .     | .    | .    | .   | SOMGT:0:9,0/1:7G  | A | 0 |
| . | .  | . | .   | .   | .     | .     | .    | .    | .   | SOMGT:0:22 0/1:7G | T | 0 |
| . | .  | . | .   | .   | .     | .     | .    | 0    | .   | SOMGT:0:12 0/1:7C | T | 0 |
| . | .  | . | .   | .   | .     | .     | .    | .    | .   | SOMGT:0:13 0/1:7C | A | 0 |
| . | .  | . | .   | .   | .     | .     | 2    | .    | .   | SOMGT:0:23 0/1:7C | G | 0 |
| . | .  | . | .   | .   | .     | .     | 2.5  | 2.83 | .   | SOMGT:0:11 0/1:7C | T | 0 |
| . | .  | . | .   | .   | .     | .     | .    | .    | .   | SOMGT:0:28 0/1:7G | C | 0 |
| . | .  | . | .   | .   | .     | .     | 2.9  | .    | .   | SOMGT:0:21 0/1:7C | T | 0 |
| . | .  | . | .   | .   | .     | .     | .    | .    | .   | SOMGT:0:33 0/1:7A | G | 0 |
| . | .  | . | .   | .   | .     | .     | 1.29 | 0.5  | 0.5 | SOMGT:0:13 0/1:7G | A | 0 |
| . | .  | . | .   | .   | .     | .     | .    | .    | .   | SOMGT:0:55 0/1:7G | A | 0 |



| shared_he     | OMIM | GWAS_Pu | HGM  | GO_GO_GO | KEG  | CID | BIO | REACTOME_PATHWAY                 |
|---------------|------|---------|------|----------|------|-----|-----|----------------------------------|
| 0 .           | NA   | .       | .    | .        | .    | .   | .   | .                                |
| 0 .           | NA   | .       | .    | .        | .    | .   | .   | .                                |
| 0 .           | NA   | .       | .    | .        | .    | .   | .   | .                                |
| 0 .           | NA   | .       | .    | .        | .    | .   | .   | .                                |
| 0 .           | NA   | .       | .    | .        | .    | .   | .   | .                                |
| 0 Homocysti   | NA   | .       | CAR  | .        | OXI  | KEG | C   | REACTOME_METABOLISM_OF_VIT       |
| 0 .           | NA   | .       | .    | .        | .    | .   | .   | .                                |
| 0 .           | NA   | .       | .    | .        | .    | .   | .   | .                                |
| 0 .           | NA   | .       | .    | .        | .    | .   | .   | .                                |
| 0 .           | NA   | .       | .    | .        | .    | .   | .   | .                                |
| 0 Rhabdomy    | NA   | .       | CELI | .        | TRAI | .   | .   | .                                |
| 0 .           | NA   | .       | .    | NUC      | RNA  | KEG | CID | REACTOME_RNA_POL_II_TRANSC       |
| 0 .           | NA   | .       | RNA  | ORGR     | RNA  | KEG | C   | REACTOME_PROCESSING_OF_CAF       |
| 0 .           | NA   | .       | .    | .        | .    | .   | .   | .                                |
| 0 .           | NA   | .       | CAR  | .        | OXI  | KEG | C   | REACTOME_BIOLOGICAL_OXIDATI      |
| 0 .           | NA   | .       | LIPI | INTR     | TRAI | .   | .   | REACTOME_PHOSPHOLIPID_META       |
| 0 .           | NA   | .       | .    | .        | .    | .   | .   | .                                |
| 0 .           | NA   | .       | .    | .        | .    | .   | .   | .                                |
| 0 .           | NA   | .       | .    | .        | .    | .   | .   | .                                |
| 0 .           | NA   | .       | .    | .        | .    | .   | .   | .                                |
| 0 .           | NA   | .       | .    | .        | .    | .   | .   | .                                |
| 0 .           | NA   | .       | .    | .        | .    | .   | .   | .                                |
| 0 .           | NA   | .       | .    | .        | .    | .   | .   | .                                |
| 0 .           | NA   | .       | .    | .        | .    | .   | .   | .                                |
| 0 .           | NA   | .       | .    | .        | .    | .   | .   | .                                |
| 0 .           | NA   | .       | .    | .        | .    | .   | .   | .                                |
| 0 .           | NA   | .       | .    | .        | .    | .   | .   | .                                |
| 0 .           | NA   | .       | .    | .        | .    | .   | .   | .                                |
| 0 .           | NA   | .       | .    | .        | .    | .   | .   | .                                |
| 0 .           | NA   | .       | .    | .        | .    | .   | .   | .                                |
| 0 .           | NA   | .       | .    | .        | .    | .   | .   | .                                |
| 0 .           | NA   | .       | .    | .        | .    | .   | .   | .                                |
| 0 .           | NA   | .       | .    | .        | .    | .   | .   | .                                |
| 0 .           | NA   | .       | .    | .        | .    | .   | .   | .                                |
| 0 .           | NA   | .       | .    | .        | .    | .   | .   | .                                |
| 0 .           | NA   | .       | .    | .        | .    | .   | .   | .                                |
| 0 .           | NA   | .       | .    | .        | .    | .   | .   | .                                |
| 0 .           | NA   | .       | .    | .        | .    | .   | .   | .                                |
| 0 .           | NA   | .       | .    | .        | .    | .   | .   | .                                |
| 0 .           | NA   | .       | MUL  | .        | REC  | .   | .   | .                                |
| 0 .           | NA   | .       | .    | .        | .    | .   | .   | .                                |
| 0 {Malaria, r | NA   | .       | SIGM | .        | .    | KEG | CID | BIO REACTOME_IMMUNOREGULATORY    |
| 0 .           | NA   | .       | NEG  | NUC      | TRAI | .   | PID | REACTOME_RNA_POL_III_TRANSC      |
| 0 .           | NA   | .       | .    | .        | .    | .   | .   | .                                |
| 0 HEM skele   | NA   | .       | .    | ORGD     | NA   | .   | .   | REACTOME_METABOLISM_OF_LIPI      |
| 0 .           | NA   | .       | .    | .        | .    | .   | .   | .                                |
| 0 .           | NA   | .       | .    | .        | .    | .   | .   | .                                |
| 0 .           | NA   | .       | .    | .        | .    | .   | .   | .                                |
| 0 .           | NA   | .       | .    | .        | .    | .   | .   | .                                |
| 0 .           | NA   | .       | .    | .        | .    | .   | .   | .                                |
| 0 .           | NA   | .       | .    | .        | .    | .   | .   | .                                |
| 0 .           | NA   | .       | .    | .        | .    | .   | .   | .                                |
| 0 .           | NA   | .       | .    | .        | .    | .   | .   | .                                |
| 0 .           | NA   | .       | .    | .        | .    | .   | .   | .                                |
| 0 .           | NA   | .       | .    | .        | .    | .   | .   | .                                |
| 0 .           | NA   | .       | .    | INTR     | INTE | KEG | CID | BIO REACTOME_SIGNALING_BY_ILS;RE |
| 0 .           | NA   | .       | .    | .        | .    | .   | .   | .                                |
| 0 .           | NA   | .       | .    | .        | .    | .   | .   | .                                |

|    |             |     |       |          |       |       |                             |                             |                             |
|----|-------------|-----|-------|----------|-------|-------|-----------------------------|-----------------------------|-----------------------------|
| 0. | NA          | .   | .     | .        | .     | .     | .                           | .                           | .                           |
| 0. | NA          | .   | .     | .        | .     | .     | .                           | .                           | .                           |
| 0. | NA          | .   | .     | .        | .     | KEGC. | .                           | REACTOME_METABOLISM_OF_PRC  | .                           |
| 0  | Mowat-Wil   | NA  | .     | .        | .     | .     | .                           | .                           | .                           |
| 0. | NA          | .   | CELI  | NUC.     | .     | PID.  | .                           | .                           | .                           |
| 0. | NA          | .   | RNA   | ORGLIGA  | KEGC. | .     | REACTOME_MITOCHONDRIAL_TRN  | .                           | .                           |
| 0. | NA          | .   | .     | .        | .     | .     | .                           | .                           | .                           |
| 0. | NA          | .   | .     | INTRG_PI | KEGC. | .     | REACTOME_SIGNALING_BY_GPCR  | .                           | .                           |
| 0  | Spinal mus  | NA  | .     | PRO.     | UNF.  | .     | .                           | .                           | .                           |
| 0. | NA          | .   | .     | .        | .     | .     | .                           | .                           | .                           |
| 0. | NA          | .   | RNA.  | TRAI.    | PID.  | .     | .                           | .                           | .                           |
| 0. | NA          | .   | .     | .        | .     | .     | .                           | .                           | .                           |
| 0. | NA          | .   | N_TI  | NUC HIST | KEGC  | PID   | BIO                         | REACTOME_PRE_NOTCH_TRANSC   | .                           |
| 0  | Nail disord | NA  | .     | MEV      | CYT   | LIPA  | KEGC.                       | .                           | .                           |
| 0. | NA          | .   | EST). | .        | .     | .     | .                           | .                           | .                           |
| 0. | NA          | CM1 | EST). | .        | .     | .     | .                           | .                           | .                           |
| 0. | NA          | .   | .     | .        | .     | .     | .                           | .                           | .                           |
| 0. | NA          | .   | .     | .        | .     | .     | .                           | .                           | .                           |
| 0. | NA          | .   | .     | .        | .     | .     | .                           | .                           | .                           |
| 0. | NA          | .   | .     | .        | .     | .     | .                           | .                           | .                           |
| 0. | NA          | .   | .     | .        | .     | .     | .                           | .                           | .                           |
| 0. | NA          | .   | REG.  | .        | KEGC. | .     | .                           | .                           | .                           |
| 0. | NA          | .   | .     | .        | .     | .     | .                           | .                           | .                           |
| 0. | NA          | .   | .     | .        | .     | .     | .                           | .                           | .                           |
| 0. | NA          | .   | .     | .        | .     | .     | .                           | .                           | .                           |
| 0. | NA          | .   | .     | .        | .     | .     | .                           | .                           | .                           |
| 0. | NA          | .   | .     | .        | .     | .     | .                           | .                           | .                           |
| 0. | NA          | .   | .     | .        | .     | .     | .                           | .                           | .                           |
| 0. | NA          | .   | .     | .        | .     | .     | .                           | .                           | .                           |
| 0. | NA          | .   | .     | .        | .     | .     | .                           | .                           | .                           |
| 0. | NA          | .   | .     | .        | .     | .     | .                           | .                           | .                           |
| 0. | NA          | .   | .     | .        | .     | .     | .                           | .                           | .                           |
| 0. | NA          | .   | .     | .        | .     | .     | .                           | .                           | .                           |
| 0. | NA          | .   | .     | .        | .     | .     | .                           | .                           | .                           |
| 0. | NA          | .   | .     | .        | .     | .     | .                           | REACTOME_METABOLISM_OF_NOI  | .                           |
| 0. | NA          | .   | .     | .        | .     | KEGC. | .                           | .                           | .                           |
| 0. | NA          | .   | .     | .        | .     | .     | .                           | .                           | .                           |
| 0. | NA          | .   | BIOF. | .        | KEGC  | PID   | BIO                         | REACTOME_SIGNALLING_BY_NGF; | .                           |
| 0. | NA          | .   | CELI  | PRO      | PRO   | KEGC  | PID                         | BIO                         | REACTOME_SIGNALING_BY_WNT;F |
| 0. | NA          | .   | .     | .        | .     | .     | .                           | .                           | .                           |
| 0. | NA          | .   | .     | .        | .     | .     | .                           | .                           | .                           |
| 0. | NA          | .   | .     | .        | .     | .     | .                           | .                           | .                           |
| 0. | NA          | .   | .     | .        | .     | .     | .                           | .                           | .                           |
| 0. | NA          | .   | COF.  | .        | KEGC. | .     | REACTOME_BIOLOGICAL_OXIDATI | .                           | .                           |
| 0. | NA          | .   | .     | .        | .     | .     | .                           | .                           | .                           |
| 0. | NA          | .   | .     | .        | .     | .     | .                           | .                           | .                           |
| 0. | NA          | .   | .     | .        | .     | .     | .                           | .                           | .                           |
| 0. | NA          | .   | .     | .        | .     | .     | .                           | .                           | .                           |
| 0  | Coenzyme    | NA  | .     | ISO      | F.    | TRAI  | KEGC.                       | .                           | .                           |
| 0. | NA          | .   | .     | .        | .     | .     | .                           | .                           | .                           |
| 0. | NA          | .   | .     | .        | .     | .     | .                           | REACTOME_TRANSMEMBRANE_TF   | .                           |
| 0. | NA          | .   | MUS   | MEV.     | .     | .     | BIO.                        | .                           | .                           |

|    |             |    |                |           |       |                            |                             |   |
|----|-------------|----|----------------|-----------|-------|----------------------------|-----------------------------|---|
| 0. | NA          | .  | .              | .         | .     | .                          | .                           | . |
| 0. | NA          | .  | .              | .         | KEGC. | .                          | .                           | . |
| 0. | NA          | .  | MAC EUK TRAI.  | .         | .     | .                          | REACTOME_TRANSLATION;REACTO | . |
| 0. | NA          | .  | .              | .         | .     | .                          | .                           | . |
| 0. | NA          | .  | MUS.           | EXO.      | .     | .                          | .                           | . |
| 0. | NA          | .  | .              | .         | .     | .                          | .                           | . |
| 0. | NA          | .  | .              | .         | .     | .                          | .                           | . |
| 0. | NA          | .  | .              | .         | .     | .                          | .                           | . |
| 0. | NA          | .  | .              | .         | .     | .                          | .                           | . |
| 0. | NA          | .  | .              | .         | .     | .                          | .                           | . |
| 0. | NA          | .  | .              | .         | .     | .                          | .                           | . |
| 0. | NA          | .  | .              | .         | .     | .                          | .                           | . |
| 0. | NA          | .  | .              | .         | .     | .                          | .                           | . |
| 0. | NA          | .  | .              | .         | .     | .                          | .                           | . |
| 0. | NA          | .  | .              | .         | .     | .                          | .                           | . |
| 0. | NA          | .  | .              | .         | KEGC. | .                          | .                           | . |
| 0. | NA          | .  | DNA.           | SING.     | PID.  | .                          | REACTOME_MEIOSIS;REACTOME_I | . |
| 0. | NA          | .  | .              | .         | .     | .                          | .                           | . |
| 0. | NA          | .  | .              | .         | .     | .                          | .                           | . |
| 0. | NA          | .  | .              | .         | .     | .                          | .                           | . |
| 0. | NA          | .  | .              | .         | .     | .                          | .                           | . |
| 0. | NA          | .  | .              | .         | .     | .                          | .                           | . |
| 0. | NA          | .  | .              | .         | .     | .                          | .                           | . |
| 0. | NA          | .  | .              | .         | .     | .                          | .                           | . |
| 0. | NA          | .  | EST/ORG.       | .         | .     | .                          | .                           | . |
| 0. | NA          | .  | .              | .         | .     | .                          | .                           | . |
| 0. | NA          | .  | .              | .         | .     | .                          | .                           | . |
| 0. | NA          | .  | .              | .         | .     | .                          | .                           | . |
| 0. | NA          | .  | PHO CYT(       | PHO KEGC. | .     | .                          | .                           | . |
| 0. | NA          | .  | .              | .         | .     | .                          | .                           | . |
| 0. | NA          | .  | .              | .         | .     | .                          | .                           | . |
| 0. | NA          | .  | .              | .         | .     | .                          | .                           | . |
| 0. | NA          | .  | .              | .         | .     | .                          | .                           | . |
| 0. | NA          | .  | .              | .         | .     | .                          | .                           | . |
| 0. | NA          | .  | BIOF.          | NUC.      | .     | .                          | .                           | . |
| 0. | NA          | .  | .              | .         | .     | .                          | .                           | . |
| 0  | Telangiect: | NA | REG INTR.      | .         | PID.  | .                          | .                           | . |
| 0. | NA          | .  | .              | IDEN.     | .     | .                          | .                           | . |
| 0  | Thrombotic  | NA | BIOF PRO INTE. | .         | .     | .                          | .                           | . |
| 0  | Dopamine    | NA | CELI CYT(      | KEGC.     | BIO   | REACTOME_METABOLISM_OF_AMI | .                           | . |
| 0. | NA          | .  | .              | .         | .     | .                          | .                           | . |
| 0. | NA          | .  | BIOF.          | .         | .     | REACTOME_MEMBRANE_BINDING_ | .                           | . |
| 0  | Deafness,   | NA | PRO ORG HYD.   | .         | .     | .                          | .                           | . |
| 0  | Deafness,   | NA | PRO ORG HYD.   | .         | .     | .                          | .                           | . |
| 0. | NA          | .  | .              | .         | .     | .                          | .                           | . |
| 0. | NA          | .  | MUS CYT(ACTI.  | PID.      | .     | .                          | .                           | . |
| 0. | NA          | .  | .              | .         | .     | .                          | .                           | . |
| 0. | NA          | .  | .              | .         | .     | .                          | .                           | . |
| 0. | NA          | .  | .              | .         | .     | .                          | .                           | . |







|   |              |    |                           |      |                             |
|---|--------------|----|---------------------------|------|-----------------------------|
| 0 | NA           |    |                           |      |                             |
| 0 | NA           |    | SYS INTR.                 |      |                             |
| 0 | NA           |    | SYS INTR.                 |      |                             |
| 0 | NA           |    | GAMORGCHR.                |      |                             |
| 0 | NA           |    |                           |      |                             |
| 0 | NA           |    |                           |      |                             |
| 0 | Renal cell i | NA |                           | PID. |                             |
| 0 | Renal cell i | NA |                           | PID. |                             |
| 0 | Aland Islar  | NA | DET INTRCATI KEGC.        |      |                             |
| 0 | NA           |    |                           |      |                             |
| 0 | NA           |    | REG ORG.                  |      | REACTOME_DIABETES_PATHWAYS  |
| 0 | NA           |    |                           |      |                             |
| 0 | Androgen i   | NA | EST CYT LIGA KEGC PID.    |      | REACTOME_GENERIC_TRANSCRIP  |
| 0 | NA           |    |                           |      |                             |
| 0 | Mental retz  | NA |                           |      |                             |
| 0 | NA           |    |                           |      |                             |
| 0 | NA           |    | RNA NUC RNA.              |      | REACTOME_PROCESSING_OF_INT  |
| 0 | NA           |    |                           |      |                             |
| 0 | NA           |    | KEGC.                     |      | REACTOME_HS_GAG_BIOSYNTHES  |
| 0 | NA           |    | CYT PID.                  |      | REACTOME_SIGNALING_BY_RHO_  |
| 0 | NA           |    |                           |      |                             |
| 0 | NA           |    |                           |      |                             |
| 0 | NA           |    | REG MEM KINA KEGC PID BIO |      | REACTOME_SIGNALLING_BY_NGF; |
| 0 | NA           |    | REG MEM KINA KEGC PID BIO |      | REACTOME_SIGNALLING_BY_NGF; |
| 0 | NA           |    |                           |      |                             |
| 0 | NA           |    |                           |      |                             |
| 0 | NA           |    |                           |      |                             |
| 0 | NA           |    |                           |      |                             |
| 0 | NA           |    |                           |      |                             |
| 0 | Meier-Gorl   | NA | DNA NUC DNA KEGC PID BIO  |      | REACTOME_ACTIVATION_OF_THE_ |
| 0 | NA           |    |                           |      |                             |
| 0 | Myopia 21,   | NA |                           |      |                             |
| 0 | NA           |    | EST INTRCATI.             |      | REACTOME_NEURONAL_SYSTEM;F  |
| 0 | NA           |    |                           |      |                             |
| 0 | NA           |    |                           |      |                             |
| 0 | NA           |    |                           |      |                             |
| 0 | NA           |    |                           |      |                             |
| 0 | NA           |    |                           |      |                             |
| 0 | NA           |    |                           |      |                             |
| 0 | NA           |    |                           |      |                             |
| 0 | NA           |    |                           |      |                             |
| 0 | NA           |    |                           |      |                             |
| 0 | NA           |    |                           |      |                             |
| 0 | NA           |    |                           |      |                             |
| 0 | NA           |    |                           |      |                             |
| 0 | NA           |    |                           |      |                             |
| 0 | NA           |    |                           |      |                             |
| 0 | NA           |    |                           |      |                             |
| 0 | NA           |    |                           |      |                             |
| 0 | NA           |    |                           |      |                             |
| 0 | NA           |    |                           |      |                             |
| 0 | NA           |    |                           |      |                             |
| 0 | NA           |    |                           |      |                             |
| 0 | NA           |    |                           |      |                             |
| 0 | NA           |    | KEGC.                     |      |                             |
| 0 | NA           |    | STEI CYT TRA KEGC.        |      |                             |
| 0 | NA           |    |                           |      |                             |





|                |    |   |                |               |        |        |                 |                             |   |
|----------------|----|---|----------------|---------------|--------|--------|-----------------|-----------------------------|---|
| 0 .            | NA | . | .              | .             | .      | .      | .               | .                           | . |
| 0 .            | NA | . | .              | .             | .      | .      | .               | .                           | . |
| 0 .            | NA | . | .              | .             | .      | .      | .               | .                           | . |
| 0 Charcot-Mi   | NA | . | .              | .             | .      | .      | .               | .                           | . |
| 0 .            | NA | . | ORG .          | RAS,KEG(PID . |        |        |                 | REACTOME_FACTORS_INVOLVED_  |   |
| 0 .            | NA | . | RNA NUC TRAI   | KEG(PID .     |        |        |                 | REACTOME_PRE_NOTCH_TRANSC   |   |
| 0 .            | NA | . | BIOF NUC PHO . |               |        |        |                 |                             |   |
| 0 .            | NA | . | .              | .             | .      | .      | .               | .                           | . |
| 0 .            | NA | . | EST/ .         | CATI .        |        |        |                 | REACTOME_NEURONAL_SYSTEM;F  |   |
| 0 .            | NA | . | .              | .             | .      | .      | .               | .                           | . |
| 0 .            | NA | . | .              | CYT(ISO       | KEG( . |        |                 | REACTOME_CHONDROITIN_SULFA  |   |
| 0 .            | NA | . | RNA NUC .      |               |        |        |                 |                             |   |
| 0 Ciliary dyst | NA | . | .              | .             | .      | .      | .               | .                           | . |
| 0 .            | NA | . | .              | .             | .      | .      | .               | .                           | . |
| 0 .            | NA | . | .              | .             | .      | .      | .               | .                           | . |
| 0 .            | NA | . | .              | .             | .      | .      | .               | .                           | . |
| 0 .            | NA | . | .              | .             | .      | .      | .               | .                           | . |
| 0 .            | NA | . | .              | .             | .      | .      | .               | .                           | . |
| 0 .            | NA | . | .              | .             | .      | .      | .               | .                           | . |
| 0 .            | NA | . | .              | .             | .      | .      | .               | .                           | . |
| 0 .            | NA | . | .              | .             | .      | .      | .               | .                           | . |
| 0 .            | NA | . | .              | .             | .      | .      | .               | .                           | . |
| 0 .            | NA | . | .              | .             | .      | .      | .               | .                           | . |
| 0 .            | NA | . | .              | .             | .      | .      | .               | .                           | . |
| 0 .            | NA | . | .              | .             | .      | .      | .               | .                           | . |
| 0 .            | NA | . | .              | .             | .      | .      | .               | .                           | . |
| 0 .            | NA | . | .              | .             | .      | .      | .               | .                           | . |
| 0 .            | NA | . | SIGN .         |               |        |        |                 |                             |   |
| 0 .            | NA | . | EST/CELI       | ANIC .        |        |        |                 | REACTOME_TRANSMEMBRANE_TF   |   |
| 0 .            | NA | . | EST/ORG        | NUC .         |        |        |                 |                             |   |
| 0 .            | NA | . | EST/ORG        | NUC .         |        |        |                 |                             |   |
| 0 .            | NA | . | BIOF INTR      | PRO KEG( .    |        |        |                 |                             |   |
| 0 .            | NA | . | .              | .             | .      | .      | .               | .                           | . |
| 0 .            | NA | . | .              | .             | .      | .      | .               | .                           | . |
| 0 .            | NA | . | .              | .             | .      | .      | .               | .                           | . |
| 0 Occult mar   | NA | . | .              | .             | .      | .      | .               | .                           | . |
| 0 .            | NA | . | .              | .             | .      | .      | .               | .                           | . |
| 0 .            | NA | . | .              | .             | .      | .      | .               | .                           | . |
| 0 Spastic pai  | NA | . | .              | .             | .      | KEG( . |                 | REACTOME_MEMBRANE_TRAFFIC   |   |
| 0 .            | NA | . | .              | .             | .      | .      | .               | .                           | . |
| 0 .            | NA | . | .              | .             | .      | .      | .               | .                           | . |
| 0 .            | NA | . | .              | .             | .      | .      | .               | .                           | . |
| 0 .            | NA | . | SYS .          |               |        |        |                 |                             |   |
| 0 .            | NA | . | .              | .             | .      | .      | PID .           | REACTOME_TRANSMEMBRANE_TF   |   |
| 0 Lymphopla    | NA | . | RNA .          |               |        |        | PID .           |                             |   |
| 0 .            | NA | . | .              | .             | .      | .      | .               | .                           | . |
| 0 .            | NA | . | .              | .             | .      | .      | .               | .                           | . |
| 0 .            | NA | . | .              | .             | .      | .      | .               | .                           | . |
| 0 .            | NA | . | .              | .             | .      | .      | .               | .                           | . |
| 0 .            | NA | . | .              | .             | .      | .      | .               | .                           | . |
| 0 .            | NA | . | .              | .             | .      | .      | .               | .                           | . |
| 0 .            | NA | . | .              | .             | .      | .      | .               | .                           | . |
| 0 .            | NA | . | .              | .             | .      | .      | .               | .                           | . |
| 0 .            | NA | . | .              | .             | .      | .      | .               | .                           | . |
| 0 .            | NA | . | .              | .             | .      | .      | .               | .                           | . |
| 0 .            | NA | . | .              | .             | .      | .      | GTP,KEG(PID,BIO | REACTOME_SIGNALLING_BY_NGF; |   |

|               |    |   |                |           |          |                             |                            |
|---------------|----|---|----------------|-----------|----------|-----------------------------|----------------------------|
| 0 .           | NA | . | CELI MEM CATI  | KEGC.     | .        | REACTOME_TRANSMISSION_ACRC  |                            |
| 0 Megaloblast | NA | . | EST/ MEM PRO.  | .         | .        | REACTOME_METABOLISM_OF_STE  |                            |
| 0 .           | NA | . | .              | .         | .        | .                           |                            |
| 0 .           | NA | . | .              | .         | .        | .                           |                            |
| 0 .           | NA | . | .              | .         | .        | .                           |                            |
| 0 .           | NA | . | .              | .         | .        | REACTOME_MITOCHONDRIAL_PRC  |                            |
| 0 .           | NA | . | .              | .         | .        | .                           |                            |
| 0 .           | NA | . | EST/           | CYT(      | .        | .                           |                            |
| 0 .           | NA | . | .              | .         | KEGC.    | REACTOME_TRANSMEMBRANE_TR   |                            |
| 0 .           | NA | . | .              | .         | .        | .                           |                            |
| 0 .           | NA | . | .              | .         | .        | .                           |                            |
| 0 .           | NA | . | DIGE PRO STRI  | KEGC.     | .        | REACTOME_O_LINKED_GLYCOSYL  |                            |
| 0 {Pulmonar   | NA | . | .              | .         | .        | REACTOME_O_LINKED_GLYCOSYL  |                            |
| 0 .           | NA | . | .              | .         | .        | .                           |                            |
| 0 .           | NA | . | SIG/ ORGRAS.   | .         | .        | .                           |                            |
| 0 Exostoses,  | NA | . | SYS' ORG.      | KEGC.     | .        | REACTOME_HS_GAG_BIOSYNTHES  |                            |
| 0 .           | NA | . | .              | .         | .        | .                           |                            |
| 0 .           | NA | . | POS .          | KEG( PID. | .        | REACTOME_VEGF_LIGAND_RECEP  |                            |
| 0 .           | NA | . | BIO/ CYT( ACIC | KEGC.     | .        | REACTOME_DIABETES_PATHWAYS  |                            |
| 0 .           | NA | . | .              | ORG.      | .        | REACTOME_MHC_CLASS_II_ANTIG |                            |
| 0 .           | NA | . | .              | .         | .        | .                           |                            |
| 0 .           | NA | . | REG CYT( RAS   | KEG( PID. | .        | REACTOME_SIGNALING_BY_RHO(  |                            |
| 0 .           | NA | . | REG CYT( RAS   | KEG( PID. | .        | REACTOME_SIGNALING_BY_RHO(  |                            |
| 0 .           | NA | . | .              | .         | .        | .                           |                            |
| 0 Deafness,   | NA | . | LYS( ORG CALI. | .         | .        | .                           |                            |
| 0 .           | NA | . | RNA NUC.       | .         | .        | .                           |                            |
| 0 .           | NA | . | .              | .         | .        | .                           |                            |
| 0 .           | NA | . | GLY( INTREXO   | KEGC.     | .        | .                           |                            |
| 0 .           | NA | . | .              | .         | KEGC.    | REACTOME_SIGNALING_BY_GPCR  |                            |
| 0 .           | NA | . | .              | .         | .        | .                           |                            |
| 0 .           | NA | . | .              | .         | .        | .                           |                            |
| 0 .           | NA | . | .              | .         | .        | .                           |                            |
| 0 .           | NA | . | .              | .         | .        | .                           |                            |
| 0 .           | NA | . | .              | .         | .        | .                           |                            |
| 0 .           | NA | . | .              | .         | .        | .                           |                            |
| 0 .           | NA | . | .              | .         | .        | .                           |                            |
| 0 .           | NA | . | .              | .         | .        | .                           |                            |
| 0 Deafness,   | NA | . | .              | .         | .        | .                           |                            |
| 0 .           | NA | . | CELI CYT(      | .         | .        | .                           |                            |
| 0 .           | NA | . | .              | .         | .        | .                           |                            |
| 0 .           | NA | . | .              | .         | .        | .                           |                            |
| 0 .           | NA | . | .              | .         | .        | .                           |                            |
| 0 .           | NA | . | .              | .         | .        | .                           |                            |
| 0 Spermatog   | NA | . | SYS' CELI OXIE | KEGC.     | BIO      | REACTOME_LATENT_INFECTION_C |                            |
| 0 .           | NA | . | .              | NUC TRAI  | KEG( PID | BIO                         | REACTOME_DEVELOPMENTAL_BIC |
| 0 .           | NA | . | DNA NON TRAI   | KEG( PID  | BIO      | REACTOME_TRIF_MEDIATED_TLR3 |                            |
| 0 .           | NA | . | .              | .         | .        | .                           |                            |
| 0 .           | NA | . | .              | .         | .        | .                           |                            |
| 0 .           | NA | . | .              | .         | .        | .                           |                            |
| 0 .           | NA | . | PRO CYT( SERI. | .         | .        | REACTOME_IMMUNE_SYSTEM;REA  |                            |
| 0 .           | NA | . | .              | .         | .        | .                           |                            |
| 0 .           | NA | . | .              | .         | KEGC.    | REACTOME_SIGNALING_BY_GPCR  |                            |
| 0 .           | NA | . | .              | .         | .        | .                           |                            |
| 0 .           | NA | . | .              | .         | .        | .                           |                            |



|                |    |   |                             |                            |   |   |   |                             |
|----------------|----|---|-----------------------------|----------------------------|---|---|---|-----------------------------|
| 0 .            | NA | . | .                           | .                          | . | . | . | .                           |
| 0 .            | NA | . | .                           | .                          | . | . | . | .                           |
| 0 .            | NA | . | .                           | .                          | . | . | . | .                           |
| 0 Ciliary dyst | NA | . | .                           | .                          | . | . | . | .                           |
| 0 [Anhaptogl   | NA | . | DEFI.                       | .                          | . | . | . | .                           |
| 0 .            | NA | . | .                           | .                          | . | . | . | .                           |
| 0 .            | NA | . | .                           | .                          | . | . | . | .                           |
| 0 Combined     | NA | . | .                           | .                          | . | . | . | .                           |
| 0 Combined     | NA | . | .                           | .                          | . | . | . | .                           |
| 0 .            | NA | . | .                           | .                          | . | . | . | .                           |
| 0 .            | NA | . | .                           | .                          | . | . | . | .                           |
| 0 .            | NA | . | .                           | .                          | . | . | . | .                           |
| 0 .            | NA | . | .                           | .                          | . | . | . | REACTOME_INTERFERON_ALPHA_  |
| 0 .            | NA | . | CAL(CELI IDEN KEGC.         | .                          | . | . | . | REACTOME_CELL_CELL_COMMUNI  |
| 0 .            | NA | . | .                           | MOT KEGC.                  | . | . | . | .                           |
| 0 .            | NA | . | GAMORG.                     | .                          | . | . | . | .                           |
| 0 .            | NA | . | GAMORG.                     | .                          | . | . | . | .                           |
| 0 .            | NA | . | .                           | .                          | . | . | . | .                           |
| 0 .            | NA | . | .                           | .                          | . | . | . | .                           |
| 0 .            | NA | . | .                           | .                          | . | . | . | .                           |
| 0 .            | NA | . | .                           | .                          | . | . | . | .                           |
| 0 .            | NA | . | .                           | .                          | . | . | . | .                           |
| 0 .            | NA | . | .                           | .                          | . | . | . | .                           |
| 0 .            | NA | . | .                           | .                          | . | . | . | .                           |
| 0 .            | NA | . | .                           | .                          | . | . | . | .                           |
| 0 .            | NA | . | .                           | .                          | . | . | . | .                           |
| 0 .            | NA | . | .                           | .                          | . | . | . | .                           |
| 0 .            | NA | . | .                           | .                          | . | . | . | .                           |
| 0 .            | NA | . | .                           | .                          | . | . | . | .                           |
| 0 .            | NA | . | .                           | .                          | . | . | . | .                           |
| 0 .            | NA | . | .                           | .                          | . | . | . | .                           |
| 0 .            | NA | . | .                           | .                          | . | . | . | .                           |
| 0 .            | NA | . | .                           | .                          | . | . | . | .                           |
| 0 Night blind  | NA | . | .                           | .                          | . | . | . | .                           |
| 0 .            | NA | . | .                           | .                          | . | . | . | .                           |
| 0 .            | NA | . | .                           | .                          | . | . | . | .                           |
| 0 Colorectal   | NA | . | SIGN NUC.                   | KEG(PID.                   | . | . | . | .                           |
| 0 .            | NA | . | CYT(.                       | .                          | . | . | . | .                           |
| 0 .            | NA | . | .                           | .                          | . | . | . | .                           |
| 0 .            | NA | . | .                           | .                          | . | . | . | .                           |
| 0 .            | NA | . | PRO ORGCHA.                 | .                          | . | . | . | REACTOME_PROTEIN_FOLDING;RE |
| 0 .            | NA | . | .                           | .                          | . | . | . | .                           |
| 0 .            | NA | . | .                           | .                          | . | . | . | .                           |
| 0 .            | NA | . | .                           | .                          | . | . | . | .                           |
| 0 Cerebral ci  | NA | . | BIOS.                       | MET KEGC.                  | . | . | . | REACTOME_METABOLISM_OF_AMI  |
| 0 .            | NA | . | .                           | .                          | . | . | . | .                           |
| 0 .            | NA | . | .                           | MET KEGC.                  | . | . | . | .                           |
| 0 .            | NA | . | .                           | MET KEGC.                  | . | . | . | .                           |
| 0 Spastic pai  | NA | . | .                           | .                          | . | . | . | .                           |
| 0 .            | NA | . | EST/ INTRACTI.              | .                          | . | . | . | REACTOME_GLUTAMATE_NEUROT   |
| 0 .            | NA | . | REG NUC SEQ.                | .                          | . | . | . | .                           |
| 0 .            | NA | . | .                           | .                          | . | . | . | .                           |
| 0 .            | NA | . | .                           | .                          | . | . | . | .                           |
| 0 .            | NA | . | .                           | .                          | . | . | . | .                           |
| 0 Central cor  | NA | . | EST/ INTRCATI KEGC.         | .                          | . | . | . | .                           |
| 0 .            | NA | . | .                           | .                          | . | . | . | .                           |
| 0 .            | NA | . | REG INTR PEP' KEGC(PID. BIO | REACTOME_SIGNALING_BY_GPCR | . | . | . | .                           |

|    |            |    |                |                     |           |                             |   |   |   |
|----|------------|----|----------------|---------------------|-----------|-----------------------------|---|---|---|
| 0. | NA         | .  | .              | .                   | .         | .                           | . | . | . |
| 0. | NA         | .  | .              | .                   | .         | .                           | . | . | . |
| 0. | NA         | .  | BIOS RIBC REC. | .                   | .         | .                           | . | . | . |
| 0. | NA         | .  | .              | .                   | .         | .                           | . | . | . |
| 0. | NA         | .  | .              | .                   | KEGG(PID. | REACTOME_BIOLOGICAL_OXIDATI | . | . | . |
| 0. | NA         | .  | .              | .                   | KEGG(PID. | REACTOME_BIOLOGICAL_OXIDATI | . | . | . |
| 0. | NA         | .  | .              | .                   | .         | .                           | . | . | . |
| 0. | NA         | .  | .              | .                   | .         | .                           | . | . | . |
| 0. | NA         | .  | .              | .                   | .         | .                           | . | . | . |
| 0. | NA         | .  | .              | .                   | .         | .                           | . | . | . |
| 0. | NA         | .  | .              | .                   | .         | .                           | . | . | . |
| 0. | NA         | .  | .              | .                   | .         | .                           | . | . | . |
| 0. | NA         | .  | .              | .                   | .         | .                           | . | . | . |
| 0. | NA         | .  | .              | .                   | .         | .                           | . | . | . |
| 0. | NA         | .  | .              | .                   | .         | .                           | . | . | . |
| 0. | NA         | .  | .              | .                   | .         | .                           | . | . | . |
| 0. | NA         | .  | .              | .                   | .         | .                           | . | . | . |
| 0. | NA         | .  | EST,INTRCATI.  | .                   | .         | .                           | . | . | . |
| 0. | NA         | .  | .              | .                   | .         | .                           | . | . | . |
| 0. | NA         | .  | .              | .                   | .         | .                           | . | . | . |
| 0  | Conotrunc: | NA | .              | SYS' NUC PRO.       | .         | .                           | . | . | . |
| 0. | NA         | .  | .              | .                   | .         | .                           | . | . | . |
| 0. | NA         | .  | .              | .                   | .         | .                           | . | . | . |
| 0. | NA         | .  | .              | .                   | .         | .                           | . | . | . |
| 0. | NA         | .  | .              | .                   | .         | .                           | . | . | . |
| 0. | NA         | .  | .              | .                   | .         | .                           | . | . | . |
| 0. | NA         | .  | GAMORGCHR.     | .                   | .         | .                           | . | . | . |
| 0  | Opitz GBB  | NA | .              | PAT' ORG.           | KEGG.     | .                           | . | . | . |
| 0. | NA         | .  | .              | .                   | .         | .                           | . | . | . |
| 0. | NA         | .  | .              | .                   | .         | .                           | . | . | . |
| 0. | NA         | .  | .              | .                   | .         | .                           | . | . | . |
| 0. | NA         | .  | BIOF.          | .                   | .         | .                           | . | . | . |
| 0. | NA         | .  | BIOF.          | .                   | .         | .                           | . | . | . |
| 0. | NA         | .  | .              | .                   | .         | .                           | . | . | . |
| 0. | NA         | .  | .              | .                   | .         | .                           | . | . | . |
| 0. | NA         | .  | .              | .                   | .         | .                           | . | . | . |
| 0. | NA         | .  | .              | .                   | .         | .                           | . | . | . |
| 0  | Lujan-Fryn | NA | .              | RNA NUC RNA.        | PID.      | REACTOME_DEVELOPMENTAL_BIC  | . | . | . |
| 0. | NA         | .  | .              | .                   | .         | .                           | . | . | . |
| 0. | NA         | .  | .              | .                   | .         | .                           | . | . | . |
| 0  | Lissenceph | NA | .              | SYS' ORG MICF.      | PID.      | REACTOME_DEVELOPMENTAL_BIC  | . | . | . |
| 0  | Dent disea | NA | .              | LIPII ORG PHO       | KEGG.     | REACTOME_SIGNALING_BY_RHO_  | . | . | . |
| 0  | Hypothyroi | NA | .              | SIG INTR PRO.       | .         | .                           | . | . | . |
| 0. | NA         | .  | .              | .                   | .         | .                           | . | . | . |
| 0. | NA         | .  | .              | SYS' CYT(ENZ' KEGG. | .         | .                           | . | . | . |
| 0. | NA         | .  | .              | .                   | .         | .                           | . | . | . |
| 0  | Cardiac va | NA | .              | NUC CYT(ACTI        | KEGG(PID. | .                           | . | . | . |
| 0. | NA         | .  | .              | .                   | .         | .                           | . | . | . |
| 0. | NA         | .  | .              | .                   | .         | .                           | . | . | . |
| 0. | NA         | .  | .              | .                   | .         | .                           | . | . | . |
| 0. | NA         | .  | .              | .                   | .         | .                           | . | . | . |
| 0. | NA         | .  | REG NUC NUC.   | PID.BIO.            | .         | .                           | . | . | . |
| 0  | ?Neurobla: | NA | .              | DNA.                | TRAI      | KEGG(PID.BIO.               | . | . | . |

|     |             |    |        |                |   |                     |       |                             |
|-----|-------------|----|--------|----------------|---|---------------------|-------|-----------------------------|
| 0 . | NA          | .  | .      | .              | . | .                   | .     | .                           |
| 0 . | NA          | .  | .      | .              | . | .                   | .     | .                           |
| 0 . | NA          | .  | .      | .              | . | .                   | .     | .                           |
| 0 . | NA          | .  | .      | .              | . | .                   | .     | .                           |
| 0 . | NA          | .  | .      | .              | . | .                   | .     | .                           |
| 0 . | NA          | .  | .      | .              | . | .                   | .     | .                           |
| 0 . | NA          | .  | .      | .              | . | .                   | .     | .                           |
| 0 . | NA          | .  | .      | .              | . | .                   | .     | .                           |
| 0 . | NA          | .  | .      | .              | . | .                   | .     | .                           |
| 0 . | NA          | .  | .      | .              | . | .                   | .     | .                           |
| 0 . | NA          | .  | .      | .              | . | .                   | .     | REACTOME_IMMUNE_SYSTEM;REA  |
| 0   | Hypobetalii | NA | .      | REG EXTIINTE . |   | PID .               | .     | .                           |
| 0 . | NA          | .  | .      | .              | . | .                   | .     | .                           |
| 0 . | NA          | .  | SEN .  |                |   | PID .               | .     | .                           |
| 0 . | NA          | .  | SYS .  |                |   | .                   | .     | .                           |
| 0 . | NA          | .  | .      | .              | . | .                   | .     | .                           |
| 0 . | NA          | .  | .      | .              | . | .                   | .     | .                           |
| 0 . | NA          | .  | .      | .              | . | .                   | .     | .                           |
| 0 . | NA          | .  | .      | .              | . | .                   | .     | .                           |
| 0 . | NA          | .  | .      | .              | . | .                   | .     | .                           |
| 0 . | NA          | .  | .      | .              | . | .                   | .     | .                           |
| 0 . | NA          | .  | .      | .              | . | .                   | .     | .                           |
| 0 . | NA          | .  | .      | .              | . | .                   | .     | .                           |
| 0 . | NA          | .  | .      | .              | . | .                   | .     | .                           |
| 0 . | NA          | .  | .      | .              | . | .                   | .     | .                           |
| 0 . | NA          | .  | .      | .              | . | .                   | .     | .                           |
| 0 . | NA          | .  | .      | .              | . | .                   | .     | .                           |
| 0 . | NA          | .  | .      | .              | . | .                   | .     | .                           |
| 0 . | NA          | .  | .      | STRI .         |   | .                   | .     | .                           |
| 0 . | NA          | .  | .      | .              | . | .                   | .     | .                           |
| 0 . | NA          | .  | ENZ .  |                |   | KEGC .              | .     | REACTOME_DEVELOPMENTAL_BIC  |
| 0 . | NA          | .  | .      | .              | . | KEGC .              | .     | REACTOME_SIGNALING_BY_GPCR  |
| 0 . | NA          | .  | .      | .              | . | .                   | .     | .                           |
| 0 . | NA          | .  | .      | .              | . | .                   | .     | .                           |
| 0 . | NA          | .  | .      | .              | . | .                   | .     | .                           |
| 0 . | NA          | .  | .      | .              | . | .                   | .     | .                           |
| 0 . | NA          | .  | .      | .              | . | .                   | .     | .                           |
| 0 . | NA          | .  | .      | .              | . | .                   | .     | .                           |
| 0 . | NA          | .  | .      | .              | . | .                   | .     | .                           |
| 0 . | NA          | .  | BIOF . |                |   | ACIE .              | .     | .                           |
| 0 . | NA          | .  | .      | .              | . | IDEN KEGC PID BIO . | .     | .                           |
| 0   | AICA-ribos  | NA | .      | NUC .          |   | HYD KEGC .          | .     | REACTOME_METABOLISM_OF_NUC  |
| 0 . | NA          | .  | .      | .              | . | .                   | .     | .                           |
| 0 . | NA          | .  | .      | .              | . | .                   | .     | REACTOME_FACTORS_INVOLVED_  |
| 0 . | NA          | .  | .      | .              | . | .                   | .     | REACTOME_FACTORS_INVOLVED_  |
| 0 . | NA          | .  | .      | .              | . | KEGC .              | .     | REACTOME_TRANSMISSION_ACRC  |
| 0 . | NA          | .  | .      | .              | . | .                   | .     | .                           |
| 0   | Vesicouret  | NA | .      | SYS .          |   | CELLI IDEN KEGC .   | .     | REACTOME_DEVELOPMENTAL_BIC  |
| 0 . | NA          | .  | DEFI . |                |   | LIPA KEGC .         | .     | REACTOME_PHOSPHOLIPID_META  |
| 0 . | NA          | .  | .      | .              | . | .                   | .     | .                           |
| 0 . | NA          | .  | .      | .              | . | KEGC .              | .     | .                           |
| 0 . | NA          | .  | .      | .              | . | .                   | .     | .                           |
| 0   | Breast can  | NA | .      | .              | . | PHO KEGC PID BIO    | .     | REACTOME_SIGNALLING_BY_NGF; |
| 0   | Breast can  | NA | CM1 .  |                |   | PHO KEGC PID BIO    | .     | REACTOME_SIGNALLING_BY_NGF; |
| 0 . | NA          | .  | .      | .              | . | .                   | .     | .                           |
| 0 . | NA          | .  | .      | .              | . | .                   | PID . | .                           |
| 0 . | NA          | .  | .      | .              | . | RIBC RNA .          | .     | .                           |

|               |    |   |       |       |       |       |                             |                             |
|---------------|----|---|-------|-------|-------|-------|-----------------------------|-----------------------------|
| 0.            | NA | . | .     | .     | .     | .     | .                           | .                           |
| 0.            | NA | . | .     | .     | .     | .     | .                           | .                           |
| 0.            | NA | . | DETI  | INTR. | KEGC. | .     | REACTOME_GASTRIN_CREB_SIGN  | .                           |
| 0.            | NA | . | .     | .     | .     | .     | .                           | .                           |
| 0.            | NA | . | .     | .     | .     | .     | .                           | .                           |
| 0.            | NA | . | .     | .     | .     | .     | .                           | .                           |
| 0.            | NA | . | .     | .     | .     | .     | .                           | .                           |
| 0.            | NA | . | .     | .     | .     | .     | .                           | .                           |
| 0.            | NA | . | RES   | CYTO. | .     | .     | .                           | .                           |
| 0 {Abacavir t | NA | . | DEFI  | CELL. | KEGC. | .     | REACTOME_ANTIGEN_PROCESSIN  | .                           |
| 0.            | NA | . | .     | .     | KEGC  | PID.  | REACTOME_RNA_POL_I_TRANSCR  | .                           |
| 0.            | NA | . | REG.  | LIGA  | KEGC  | PID   | BIO                         | REACTOME_GENERIC_TRANSCRIP  |
| 0.            | NA | . | .     | .     | KEGC. | .     | REACTOME_PPARA_ACTIVATES_G  | .                           |
| 0.            | NA | . | .     | .     | TRAI  | KEGC. | .                           | REACTOME_BIOLOGICAL_OXIDATI |
| 0.            | NA | . | SYS   | .     | .     | PID.  | REACTOME_EXTRACELLULAR_MA   | .                           |
| 0.            | NA | . | .     | .     | .     | .     | .                           | .                           |
| 0.            | NA | . | .     | .     | .     | .     | .                           | .                           |
| 0.            | NA | . | .     | .     | .     | .     | .                           | .                           |
| 0 Diabetes n  | NA | . | REG.  | CAR   | KEGC  | PID   | BIO                         | REACTOME_DEVELOPMENTAL_BIC  |
| 0.            | NA | . | .     | .     | .     | .     | .                           | .                           |
| 0.            | NA | . | .     | .     | .     | .     | .                           | .                           |
| 0.            | NA | . | .     | .     | .     | .     | .                           | .                           |
| 0.            | NA | . | .     | .     | .     | .     | .                           | .                           |
| 0.            | NA | . | .     | .     | .     | .     | .                           | .                           |
| 0.            | NA | . | .     | .     | .     | .     | .                           | .                           |
| 0.            | NA | . | .     | .     | .     | .     | .                           | .                           |
| 0.            | NA | . | .     | .     | .     | .     | .                           | .                           |
| 0.            | NA | . | .     | .     | .     | .     | .                           | .                           |
| 0.            | NA | . | .     | .     | .     | .     | .                           | .                           |
| 0.            | NA | . | .     | .     | .     | .     | .                           | .                           |
| 0.            | NA | . | .     | .     | .     | .     | .                           | .                           |
| 0.            | NA | . | .     | .     | .     | .     | .                           | .                           |
| 0.            | NA | . | .     | .     | .     | .     | .                           | .                           |
| 0.            | NA | . | EXTI  | HYD   | KEGC  | PID   | BIO                         | REACTOME_TRANSMISSION_ACRC  |
| 0 Tumoral cz  | NA | . | .     | .     | .     | .     | .                           | .                           |
| 0.            | NA | . | GLU   | CYTO  | PHO.  | .     | REACTOME_PYRUVATE_METABOL   | .                           |
| 0.            | NA | . | .     | .     | .     | .     | .                           | .                           |
| 0.            | NA | . | .     | .     | .     | .     | .                           | .                           |
| 0 Premature   | NA | . | .     | .     | .     | .     | .                           | .                           |
| 0.            | NA | . | .     | .     | .     | .     | .                           | .                           |
| 0.            | NA | . | .     | .     | .     | .     | .                           | .                           |
| 0.            | NA | . | SIGM  | EXTI  | REC.  | PID.  | REACTOME_CELL_SURFACE_INTEI | .                           |
| 0.            | NA | . | .     | .     | .     | .     | .                           | .                           |
| 0.            | NA | . | .     | .     | .     | .     | .                           | .                           |
| 0.            | NA | . | .     | .     | .     | .     | .                           | .                           |
| 0.            | NA | . | .     | .     | .     | .     | REACTOME_TRANSMEMBRANE_TF   | .                           |
| 0 Cohen syn   | NA | . | .     | .     | .     | .     | .                           | .                           |
| 0 Seizures, t | NA | . | ESTI  | INTR  | CATI. | .     | REACTOME_DEVELOPMENTAL_BIC  | .                           |
| 0.            | NA | . | .     | .     | .     | .     | .                           | .                           |
| 0 Craniosync  | NA | . | INTR. | KEGC. | .     | .     | .                           | .                           |
| 0.            | NA | . | .     | .     | .     | .     | .                           | .                           |
| 0.            | NA | . | .     | .     | .     | .     | .                           | .                           |
| 0.            | NA | . | .     | .     | .     | .     | .                           | .                           |
| 0.            | NA | . | .     | .     | .     | .     | .                           | .                           |
| 0.            | NA | . | .     | .     | .     | .     | .                           | .                           |
| 0.            | NA | . | ADH   | STRI. | .     | .     | .                           | .                           |





|    |            |    |   |           |   |           |   |                            |   |
|----|------------|----|---|-----------|---|-----------|---|----------------------------|---|
| 0. | NA         | .  | . | .         | . | .         | . | .                          | . |
| 0. | NA         | .  | . | .         | . | .         | . | .                          | . |
| 0. | NA         | .  | . | .         | . | .         | . | .                          | . |
| 0. | NA         | .  | . | .         | . | .         | . | .                          | . |
| 0. | NA         | .  | . | .         | . | .         | . | REACTOME_TRANSMISSION_ACRC | . |
| 0. | NA         | .  | . | EXTIPRO.  | . | .         | . | .                          | . |
| 0. | NA         | .  | . | .         | . | .         | . | .                          | . |
| 0. | NA         | .  | . | .         | . | .         | . | .                          | . |
| 0  | Mainzer-S  | NA | . | .         | . | .         | . | .                          | . |
| 0. | NA         | .  | . | DEFIEXTI. | . | .         | . | .                          | . |
| 0. | NA         | .  | . | .         | . | .         | . | .                          | . |
| 0. | NA         | .  | . | .         | . | .         | . | .                          | . |
| 0. | NA         | .  | . | .         | . | .         | . | .                          | . |
| 0. | NA         | .  | . | .         | . | .         | . | .                          | . |
| 0. | NA         | .  | . | .         | . | .         | . | .                          | . |
| 0. | NA         | .  | . | .         | . | .         | . | .                          | . |
| 0. | NA         | .  | . | .         | . | .         | . | .                          | . |
| 0. | NA         | .  | . | .         | . | .         | . | .                          | . |
| 0. | NA         | .  | . | .         | . | .         | . | .                          | . |
| 0. | NA         | .  | . | .         | . | .         | . | .                          | . |
| 0. | NA         | .  | . | .         | . | .         | . | .                          | . |
| 0. | NA         | .  | . | .         | . | .         | . | .                          | . |
| 0. | NA         | .  | . | .         | . | .         | . | .                          | . |
| 0. | NA         | .  | . | .         | . | .         | . | .                          | . |
| 0. | NA         | .  | . | .         | . | .         | . | .                          | . |
| 0. | NA         | .  | . | .         | . | .         | . | .                          | . |
| 0. | NA         | .  | . | .         | . | .         | . | .                          | . |
| 0. | NA         | .  | . | .         | . | .         | . | .                          | . |
| 0. | NA         | .  | . | .         | . | .         | . | .                          | . |
| 0. | NA         | .  | . | .         | . | .         | . | .                          | . |
| 0. | NA         | .  | . | .         | . | .         | . | .                          | . |
| 0. | NA         | .  | . | .         | . | .         | . | .                          | . |
| 0. | NA         | .  | . | .         | . | .         | . | .                          | . |
| 0. | NA         | .  | . | .         | . | .         | . | .                          | . |
| 0. | NA         | .  | . | .         | . | .         | . | .                          | . |
| 0. | NA         | .  | . | .         | . | .         | . | .                          | . |
| 0. | NA         | .  | . | .         | . | .         | . | .                          | . |
| 0. | NA         | .  | . | .         | . | .         | . | REACTOME_PYRUVATE_METABOL  | . |
| 0  | Fanconi ar | NA | . | DNA CYTO. | . | PID.      | . | REACTOME_FANCONI_ANEMIA_PA | . |
| 0. | NA         | .  | . | .         | . | KEGC.     | . | .                          | . |
| 0. | NA         | .  | . | .         | . | .         | . | .                          | . |
| 0. | NA         | .  | . | NEG.      | . | TRAI.     | . | .                          | . |
| 0  | Mitochondi | NA | . | .         | . | .         | . | .                          | . |
| 0. | NA         | .  | . | .         | . | .         | . | .                          | . |
| 0. | NA         | .  | . | .         | . | .         | . | .                          | . |
| 0. | NA         | .  | . | .         | . | .         | . | .                          | . |
| 0. | NA         | .  | . | .         | . | .         | . | .                          | . |
| 0. | NA         | .  | . | .         | . | .         | . | .                          | . |
| 0. | NA         | .  | . | .         | . | .         | . | .                          | . |
| 0. | NA         | .  | . | .         | . | .         | . | .                          | . |
| 0. | NA         | .  | . | .         | . | .         | . | .                          | . |
| 0. | NA         | .  | . | .         | . | .         | . | .                          | . |
| 0. | NA         | .  | . | .         | . | .         | . | .                          | . |
| 0  | Koolen-De  | NA | . | .         | . | .         | . | .                          | . |
| 0. | NA         | .  | . | .         | . | CATIKEGC. | . | .                          | . |





|              |    |   |                       |                            |              |      |                            |   |   |
|--------------|----|---|-----------------------|----------------------------|--------------|------|----------------------------|---|---|
| 0.           | NA | . | .                     | .                          | .            | .    | .                          | . | . |
| 0.           | NA | . | .                     | .                          | .            | .    | .                          | . | . |
| 0.           | NA | . | .                     | .                          | .            | .    | .                          | . | . |
| 0.           | NA | . | .                     | .                          | .            | .    | .                          | . | . |
| 0.           | NA | . | .                     | .                          | .            | .    | .                          | . | . |
| 0.           | NA | . | .                     | .                          | .            | .    | .                          | . | . |
| 0.           | NA | . | .                     | .                          | .            | .    | .                          | . | . |
| 0.           | NA | . | .                     | .                          | .            | .    | .                          | . | . |
| 0.           | NA | . | .                     | .                          | .            | .    | .                          | . | . |
| 0.           | NA | . | .                     | .                          | .            | .    | .                          | . | . |
| 0.           | NA | . | RNA NUC.              | .                          | .            | .    | .                          | . | . |
| 0.           | NA | . | .                     | .                          | .            | .    | .                          | . | . |
| 0.           | NA | . | REG.                  | .                          | .            | .    | .                          | . | . |
| 0.           | NA | . | ACTIOGRAS,KEGCPID,BIO | REACTOME_SIGNALING_BY_RHO_ | .            | .    | .                          | . | . |
| 0.           | NA | . | .                     | .                          | .            | .    | .                          | . | . |
| 0 {Myocardia | NA | . | POS INTR.             | KEGC.                      | .            | .    | .                          | . | . |
| 0 Microceph; | NA | . | .                     | .                          | .            | .    | .                          | . | . |
| 0.           | NA | . | .                     | .                          | .            | .    | .                          | . | . |
| 0.           | NA | . | .                     | .                          | .            | .    | .                          | . | . |
| 0.           | NA | . | .                     | .                          | .            | .    | .                          | . | . |
| 0.           | NA | . | .                     | .                          | KEGCPID,BIO. | .    | .                          | . | . |
| 0.           | NA | . | .                     | .                          | .            | PID. | REACTOME_SIGNALING_BY_RHO_ | . | . |
| 0.           | NA | . | .                     | .                          | KEGCPID,BIO. | .    | .                          | . | . |
| 0.           | NA | . | .                     | .                          | .            | .    | REACTOME_RNA_POL_I_TRANSCR | . | . |
| 0.           | NA | . | .                     | .                          | .            | .    | .                          | . | . |
| 0.           | NA | . | .                     | LIGA                       | KEGCPID.     | .    | REACTOME_METABOLISM_OF_NUC | . | . |
| 0.           | NA | . | .                     | .                          | .            | .    | .                          | . | . |
| 0 Cystinuria | NA | . | EST,INTRACTI.         | .                          | .            | .    | REACTOME_AMINO_ACID_TRANSP | . | . |
| 0 Cystinuria | NA | . | EST,INTRACTI.         | .                          | .            | .    | REACTOME_AMINO_ACID_TRANSP | . | . |
| 0.           | NA | . | .                     | .                          | KEGCPID.     | .    | REACTOME_SIGNALING_BY_RHO_ | . | . |
| 0.           | NA | . | .                     | .                          | .            | .    | .                          | . | . |
| 0.           | NA | . | .                     | .                          | .            | .    | REACTOME_SIGNALING_BY_RHO_ | . | . |
| 0 Miyoshi m  | NA | . | SYS`MEV.              | .                          | .            | .    | .                          | . | . |
| 0.           | NA | . | ISOFORGOXIE           | KEGC.                      | .            | .    | .                          | . | . |
| 0.           | NA | . | .                     | .                          | .            | .    | .                          | . | . |
| 0.           | NA | . | .                     | .                          | .            | .    | .                          | . | . |
| 0.           | NA | . | .                     | .                          | .            | .    | .                          | . | . |
| 0.           | NA | . | .                     | .                          | .            | .    | .                          | . | . |
| 0.           | NA | . | .                     | .                          | .            | .    | .                          | . | . |
| 0.           | NA | . | .                     | .                          | .            | .    | .                          | . | . |
| 0.           | NA | . | .                     | .                          | .            | .    | .                          | . | . |
| 0.           | NA | . | INTRCATI.             | .                          | .            | .    | REACTOME_TRANSMEMBRANE_TF  | . | . |
| 0.           | NA | . | .                     | .                          | .            | .    | .                          | . | . |
| 0.           | NA | . | .                     | .                          | KEGC.        | BIO  | REACTOME_RNA_POL_I_TRANSCR | . | . |
| 0.           | NA | . | .                     | .                          | .            | .    | .                          | . | . |
| 0.           | NA | . | .                     | .                          | .            | .    | .                          | . | . |
| 0.           | NA | . | .                     | .                          | .            | .    | .                          | . | . |
| 0.           | NA | . | .                     | .                          | .            | .    | .                          | . | . |
| 0.           | NA | . | .                     | .                          | .            | .    | .                          | . | . |
| 0.           | NA | . | .                     | .                          | .            | .    | .                          | . | . |
| 0.           | NA | . | .                     | .                          | .            | .    | .                          | . | . |
| 0.           | NA | . | NEG CYT(.             | KEGC.                      | .            | .    | .                          | . | . |



|               |    |   |       |           |       |       |                              |                            |
|---------------|----|---|-------|-----------|-------|-------|------------------------------|----------------------------|
| 0 .           | NA | . | .     | .         | NUC.  | .     | .                            | .                          |
| 0 .           | NA | . | .     | .         | .     | .     | .                            | .                          |
| 0 .           | NA | . | .     | .         | .     | .     | .                            | .                          |
| 0 .           | NA | . | .     | .         | KEGC. | .     | .                            | .                          |
| 0 .           | NA | . | .     | .         | KEGC. | .     | .                            | .                          |
| 0 .           | NA | . | SIGN  | CYT(      | .     | .     | .                            | .                          |
| 0 Wolfram s)  | NA | . | .     | MAC.      | .     | .     | .                            | .                          |
| 0 .           | NA | . | .     | EXTICAR.  | .     | .     | REACTOME_EXTRACELLULAR_MAT   | .                          |
| 0 .           | NA | . | .     | .         | .     | .     | .                            | .                          |
| 0 Ceroid lipo | NA | . | .     | .         | KEGC. | .     | .                            | .                          |
| 0 .           | NA | . | .     | .         | .     | .     | .                            | .                          |
| 0 [Blood gro  | NA | . | .     | INTR.     | .     | .     | .                            | .                          |
| 0 .           | NA | . | SIGN  | CYT(      | PHO   | KEGC. | REACTOME_NITRIC_OXIDE_STIMUL | .                          |
| 0 Short rib-p | NA | . | .     | CYT(      | .     | .     | .                            | .                          |
| 0 .           | NA | . | .     | .         | .     | .     | .                            | .                          |
| 0 .           | NA | . | CELI  | CYT(CATI. | .     | .     | .                            | .                          |
| 0 .           | NA | . | .     | .         | .     | .     | .                            | .                          |
| 0 Increased   | NA | . | SYS   | INTR      | REC   | KEGC  | PID.BIO                      | REACTOME_GROWTH_HORMONE_   |
| 0 .           | NA | . | .     | .         | .     | .     | .                            | .                          |
| 0 .           | NA | . | .     | .         | .     | .     | .                            | .                          |
| 0 .           | NA | . | .     | .         | .     | .     | .                            | .                          |
| 0 .           | NA | . | .     | .         | .     | .     | .                            | .                          |
| 0 .           | NA | . | .     | .         | .     | .     | REACTOME_RNA_POL_I_TRANSCR   | .                          |
| 0 .           | NA | . | .     | .         | .     | .     | .                            | .                          |
| 0 Sandhoff d  | NA | . | .     | PRO       | KEGC. | .     | REACTOME_GLYCOSPHINGOLIPID_  | .                          |
| 0 Sandhoff d  | NA | . | .     | PRO       | KEGC. | .     | REACTOME_GLYCOSPHINGOLIPID_  | .                          |
| 0 D-bifunctio | NA | . | .     | CYT(LIPII | KEGC. | BIO   | REACTOME_BILE_ACID_AND_BILE_ | .                          |
| 0 Usher sync  | NA | . | .     | .         | KEGC. | .     | REACTOME_CYTOSOLIC_TRNA_AM   | .                          |
| 0 Usher sync  | NA | . | .     | .         | KEGC. | .     | REACTOME_CYTOSOLIC_TRNA_AM   | .                          |
| 0 .           | NA | . | SIGN  | NUC       | HYD.  | .     | .                            | .                          |
| 0 Hyperekple  | NA | . | REG   | INTR      | EXC   | KEGC. | REACTOME_TRANSMEMBRANE_TR    | .                          |
| 0 .           | NA | . | .     | .         | .     | .     | .                            | .                          |
| 0 .           | NA | . | .     | .         | .     | .     | REACTOME_DEVELOPMENTAL_BIC   | .                          |
| 0 .           | NA | . | .     | .         | .     | .     | .                            | .                          |
| 0 .           | NA | . | .     | .         | KEGC. | .     | .                            | .                          |
| 0 .           | NA | . | .     | .         | .     | .     | .                            | .                          |
| 0 .           | NA | . | CELI. | .         | .     | .     | .                            | .                          |
| 0 .           | NA | . | RES   | CYT(      | .     | .     | .                            | .                          |
| 0 .           | NA | . | GAM.  | .         | .     | .     | .                            | .                          |
| 0 .           | NA | . | .     | .         | KEGC. | .     | REACTOME_MEIOSIS;REACTOME_   | .                          |
| 0 .           | NA | . | .     | .         | .     | .     | .                            | .                          |
| 0 .           | NA | . | .     | .         | .     | .     | .                            | .                          |
| 0 .           | NA | . | .     | .         | .     | .     | .                            | .                          |
| 0 .           | NA | . | RNA   | NUC       | RNA   | KEGC. | .                            | .                          |
| 0 .           | NA | . | RNA   | NUC       | RNA   | KEGC. | .                            | .                          |
| 0 .           | NA | . | .     | .         | .     | .     | .                            | .                          |
| 0 {Asthma, s  | NA | . | RNA   | CELI      | REC   | KEGC  | PID.BIO                      | REACTOME_EXTRINSIC_PATHWAY |
| 0 .           | NA | . | .     | .         | .     | .     | .                            | .                          |
| 0 .           | NA | . | BIO   | NUC       | PHO.  | .     | .                            | .                          |
| 0 .           | NA | . | .     | .         | .     | .     | .                            | .                          |
| 0 Adrenal hy  | NA | . | .     | .         | KEGC. | .     | REACTOME_METABOLISM_OF_STE   | .                          |
| 0 .           | NA | . | .     | .         | .     | .     | .                            | .                          |
| 0 .           | NA | . | RNA   | NUC       | SPE   | KEGC. | .                            | .                          |
| 0 .           | NA | . | .     | .         | .     | .     | .                            | .                          |

|               |    |   |   |                      |                 |                             |                             |
|---------------|----|---|---|----------------------|-----------------|-----------------------------|-----------------------------|
| 0 Combined    | NA | . | . | .                    | KEGC.           | .                           | REACTOME_MITOCHONDRIAL_TRN  |
| 0 .           | NA | . | . | INTRG_PI.            | .               | .                           |                             |
| 0 .           | NA | . | . | .                    | .               | .                           | REACTOME_DEFENSINS;REACTOM  |
| 0 .           | NA | . | . | MITCORGPHO           | KEGC.           | .                           |                             |
| 0 .           | NA | . | . | REG CYT(ENZ'         | .               | .                           |                             |
| 0 .           | NA | . | . | .                    | .               | .                           |                             |
| 0 .           | NA | . | . | .                    | .               | .                           |                             |
| 0 .           | NA | . | . | .                    | .               | .                           |                             |
| 0 .           | NA | . | . | .                    | .               | .                           |                             |
| 0 .           | NA | . | . | RNA NUC .            | .               | .                           |                             |
| 0 Spastic pai | NA | . | . | .                    | .               | .                           |                             |
| 0 .           | NA | . | . | .                    | .               | .                           |                             |
| 0 .           | NA | . | . | .                    | .               | .                           |                             |
| 0 .           | NA | . | . | .                    | .               | .                           |                             |
| 0 .           | NA | . | . | .                    | .               | .                           |                             |
| 0 .           | NA | . | . | .                    | .               | .                           |                             |
| 0 .           | NA | . | . | .                    | .               | .                           |                             |
| 0 .           | NA | . | . | .                    | .               | .                           |                             |
| 0 .           | NA | . | . | .                    | .               | .                           |                             |
| 0 .           | NA | . | . | .                    | .               | .                           |                             |
| 0 .           | NA | . | . | .                    | .               | .                           |                             |
| 0 .           | NA | . | . | .                    | .               | .                           |                             |
| 0 .           | NA | . | . | .                    | .               | .                           |                             |
| 0 .           | NA | . | . | .                    | .               | .                           |                             |
| 0 .           | NA | . | . | .                    | KEGC.           | .                           | REACTOME_O_LINKED_GLYCOSYL  |
| 0 {Prostate c | NA | . | . | REG CYT(STR KEG(PID. | .               | .                           |                             |
| 0 .           | NA | . | . | .                    | .               | .                           |                             |
| 0 .           | NA | . | . | .                    | .               | .                           |                             |
| 0 Alopecia, r | NA | . | . | .                    | .               | .                           |                             |
| 0 Alopecia, r | NA | . | . | .                    | .               | .                           |                             |
| 0 .           | NA | . | . | .                    | .               | .                           |                             |
| 0 .           | NA | . | . | .                    | .               | .                           |                             |
| 0 Weaver sy   | NA | . | . | RNA NUC HIST.        | .               | .                           |                             |
| 0 .           | NA | . | . | .                    | .               | .                           |                             |
| 0 .           | NA | . | . | .                    | .               | .                           |                             |
| 0 .           | NA | . | . | .                    | .               | .                           |                             |
| 0 .           | NA | . | . | .                    | .               | .                           |                             |
| 0 Maturity-or | NA | . | . | SIGN.                | .               | PID.                        | REACTOME_ANTIGEN_ACTIVATES. |
| 0 .           | NA | . | . | .                    | .               | .                           |                             |
| 0 .           | NA | . | . | .                    | .               | .                           |                             |
| 0 .           | NA | . | . | .                    | .               | .                           | REACTOME_MEMBRANE_TRAFFIC   |
| 0 {?Schizop   | NA | . | . | NEG.                 | TRAIKEG(PID.BIO | REACTOME_SIGNALING_BY_ERBB  |                             |
| 0 .           | NA | . | . | .                    | KEGC.           | .                           |                             |
| 0 .           | NA | . | . | EST).                | KEGC.           | REACTOME_INSULIN_RECEPTOR_I |                             |
| 0 .           | NA | . | . | NUC IDEN.            | PID.BIO         | REACTOME_MEIOSIS;REACTOME_( |                             |
| 0 .           | NA | . | . | SYS'.                | TRAI.           | PID.                        | REACTOME_NOTCH1_INTRACELLU  |
| 0 .           | NA | . | . | .                    | .               | .                           |                             |
| 0 .           | NA | . | . | .                    | .               | .                           |                             |
| 0 .           | NA | . | . | .                    | .               | .                           |                             |
| 0 .           | NA | . | . | .                    | .               | .                           |                             |
| 0 .           | NA | . | . | .                    | .               | .                           |                             |
| 0 .           | NA | . | . | RNA NUC RNA          | KEGC.           | .                           |                             |
| 0 .           | NA | . | . | .                    | .               | .                           |                             |
| 0 Spastic pai | NA | . | . | .                    | .               | .                           |                             |
| 0 Spastic pai | NA | . | . | .                    | .               | .                           |                             |
| 0 Mental ret  | NA | . | . | .                    | .               | .                           |                             |

|     |              |    |                 |                 |             |                             |                            |   |   |
|-----|--------------|----|-----------------|-----------------|-------------|-----------------------------|----------------------------|---|---|
| 0 . | NA           | .  | .               | .               | .           | .                           | .                          | . | . |
| 0 . | NA           | .  | .               | .               | .           | .                           | .                          | . | . |
| 0 . | NA           | .  | REG .           | .               | KEG(PID.BIO | REACTOME_TRAF6_MEDIATED_IRF | .                          | . | . |
| 0 . | NA           | .  | .               | .               | .           | .                           | .                          | . | . |
| 0 . | NA           | .  | .               | .               | .           | .                           | .                          | . | . |
| 0 . | NA           | .  | .               | .               | .           | .                           | .                          | . | . |
| 0 . | NA           | .  | .               | .               | .           | .                           | .                          | . | . |
| 0 . | NA           | .  | .               | .               | .           | .                           | .                          | . | . |
| 0 . | NA           | .  | .               | .               | .           | .                           | .                          | . | . |
| 0   | Choreoaca    | NA | .               | .               | .           | .                           | .                          | . | . |
| 0 . | NA           | .  | .               | .               | .           | PID .                       | REACTOME_NOTCH1_INTRACELLU | . | . |
| 0 . | NA           | .  | .               | .               | .           | .                           | .                          | . | . |
| 0 . | NA           | .  | .               | .               | .           | .                           | .                          | . | . |
| 0 . | NA           | .  | .               | .               | .           | PID .                       | .                          | . | . |
| 0   | Nail-patella | NA | .               | RNA NUC TRAI .  | .           | .                           | .                          | . | . |
| 0 . | NA           | .  | CELI .          | .               | .           | .                           | .                          | . | . |
| 0 . | NA           | .  | .               | .               | .           | .                           | .                          | . | . |
| 0 . | NA           | .  | ENZ' .          | .               | KEG(PID.BIO | REACTOME_SIGNALLING_BY_NGF; | .                          | . | . |
| 0 . | NA           | .  | .               | .               | .           | .                           | .                          | . | . |
| 0 . | NA           | .  | .               | .               | .           | .                           | .                          | . | . |
| 0 . | NA           | .  | BIOF CYT(IDEN . | .               | .           | REACTOME_METABOLISM_OF_MRI  | .                          | . | . |
| 0 . | NA           | .  | .               | .               | .           | .                           | .                          | . | . |
| 0 . | NA           | .  | .               | .               | .           | .                           | .                          | . | . |
| 0 . | NA           | .  | .               | .               | .           | .                           | .                          | . | . |
| 0 . | NA           | .  | .               | .               | .           | .                           | .                          | . | . |
| 0 . | NA           | .  | .               | .               | .           | .                           | .                          | . | . |
| 0 . | NA           | .  | .               | .               | .           | .                           | .                          | . | . |
| 0 . | NA           | .  | .               | .               | .           | KEG(PID .                   | REACTOME_DEVELOPMENTAL_BIC | . | . |
| 0 . | NA           | .  | .               | .               | .           | KEG(PID .                   | REACTOME_DEVELOPMENTAL_BIC | . | . |
| 0   | Deafness,    | NA | .               | REG NON .       | .           | .                           | .                          | . | . |
| 0 . | NA           | .  | .               | .               | .           | .                           | .                          | . | . |
| 0 . | NA           | .  | .               | .               | .           | .                           | .                          | . | . |
| 0   | Microceph;   | NA | .               | M_PI ORG MICF . | .           | REACTOME_MHC_CLASS_II_ANTIG | .                          | . | . |
| 0 . | NA           | .  | .               | NUC TRAI .      | .           | .                           | .                          | . | . |
| 0   | {Age-relate  | NA | .               | .               | LIPIE .     | PID .                       | .                          | . | . |
| 0 . | NA           | .  | .               | .               | .           | .                           | .                          | . | . |
| 0 . | NA           | .  | .               | .               | .           | .                           | REACTOME_O_LINKED_GLYCOSYL | . | . |
| 0 . | NA           | .  | .               | .               | .           | .                           | .                          | . | . |
| 0   | Charcot-M;   | NA | .               | MEM .           | .           | .                           | .                          | . | . |
| 0 . | NA           | .  | .               | .               | .           | .                           | .                          | . | . |
| 0   | Denys-Dra    | NA | .               | .               | .           | PID.BIO .                   | .                          | . | . |
| 0 . | NA           | .  | .               | NUC NUC KEGC .  | .           | .                           | .                          | . | . |
| 0 . | NA           | .  | .               | .               | KEGC .      | .                           | .                          | . | . |
| 0 . | NA           | .  | .               | .               | .           | .                           | .                          | . | . |
| 0 . | NA           | .  | .               | .               | .           | .                           | .                          | . | . |
| 0 . | NA           | .  | .               | .               | .           | .                           | .                          | . | . |
| 0 . | NA           | .  | .               | .               | .           | .                           | .                          | . | . |
| 0 . | NA           | .  | .               | .               | .           | .                           | .                          | . | . |
| 0 . | NA           | .  | .               | .               | .           | .                           | .                          | . | . |
| 0 . | NA           | .  | POS .           | .               | KEG(PID .   | REACTOME_VEGF_LIGAND_RECEF  | .                          | . | . |
| 0 . | NA           | .  | .               | CYT(DRU .       | .           | .                           | .                          | . | . |
| 0 . | NA           | .  | .               | CYT(DRU .       | .           | .                           | .                          | . | . |







|               |    |   |          |           |       |                            |                                 |
|---------------|----|---|----------|-----------|-------|----------------------------|---------------------------------|
| 0 .           | NA | . | .        | .         | .     | .                          | .                               |
| 0 Bleeding d  | NA | . | EST/INTR | CAT/KEGC. | .     | REACTOME_ELEVATION_OF_CYTO |                                 |
| 0 .           | NA | . | .        | .         | .     | .                          | .                               |
| 0 .           | NA | . | SYS      | INTR.     | KEGC. | BIO.                       |                                 |
| 0 .           | NA | . | .        | .         | KEGC. | .                          | .                               |
| 0 .           | NA | . | .        | .         | MOT   | KEGC.                      | .                               |
| 0 .           | NA | . | GAM      | ORG.      | .     | .                          | .                               |
| 0 Mitochondi  | NA | . | .        | .         | .     | .                          | .                               |
| 0 .           | NA | . | RNA      | ORGRNA    | KEGC  | PID.                       | REACTOME_DEVELOPMENTAL_BIC      |
| 0 .           | NA | . | .        | .         | .     | .                          | .                               |
| 0 .           | NA | . | .        | .         | .     | .                          | .                               |
| 0 .           | NA | . | .        | .         | .     | .                          | .                               |
| 0 .           | NA | . | .        | .         | .     | .                          | .                               |
| 0 .           | NA | . | .        | .         | .     | .                          | .                               |
| 0 .           | NA | . | .        | .         | .     | .                          | .                               |
| 0 .           | NA | . | .        | .         | .     | .                          | .                               |
| 0 .           | NA | . | .        | .         | .     | .                          | .                               |
| 0 .           | NA | . | .        | .         | .     | .                          | .                               |
| 0 .           | NA | . | .        | .         | .     | .                          | .                               |
| 0 .           | NA | . | .        | .         | .     | .                          | .                               |
| 0 .           | NA | . | .        | .         | .     | .                          | .                               |
| 0 .           | NA | . | REG      | ORG.      | .     | .                          | REACTOME_SIGNALING_BY_RHO_      |
| 0 .           | NA | . | .        | .         | .     | .                          | .                               |
| 0 .           | NA | . | .        | .         | .     | .                          | .                               |
| 0 .           | NA | . | .        | .         | .     | .                          | .                               |
| 0 Acetyl-CoA  | NA | . | .        | .         | LIGA  | KEGC.                      | BIO REACTOME_TRIGLYCERIDE_BIOSY |
| 0 .           | NA | . | EST/     | ORG.      | .     | .                          | .                               |
| 0 .           | NA | . | .        | .         | .     | .                          | .                               |
| 0 .           | NA | . | RNA      | NUC       | RNA.  | PID.                       | BIO REACTOME_DEVELOPMENTAL_BIC  |
| 0 .           | NA | . | .        | .         | .     | .                          | .                               |
| 0 .           | NA | . | .        | .         | .     | .                          | .                               |
| 0 Ovalocytos  | NA | . | REG      | INTR      | ANIC. | .                          | REACTOME_TRANSMEMBRANE_TF       |
| 0 .           | NA | . | .        | .         | KEGC. | .                          | .                               |
| 0 .           | NA | . | .        | .         | MEM   | CAT/KEGC                   | PID.                            |
| 0 .           | NA | . | .        | .         | CYT   | REC.                       | REACTOME_DEVELOPMENTAL_BIC      |
| 0 .           | NA | . | .        | .         | KEGC. | .                          | .                               |
| 0 .           | NA | . | .        | .         | KEGC. | .                          | .                               |
| 0 .           | NA | . | .        | .         | .     | .                          | .                               |
| 0 Hemophag    | NA | . | .        | .         | .     | .                          | .                               |
| 0 .           | NA | . | .        | .         | .     | .                          | .                               |
| 0 .           | NA | . | SYS      | MEM       | MOL   | KEGC                       | PID.                            |
| 0 .           | NA | . | .        | .         | .     | .                          | .                               |
| 0 .           | NA | . | REG      | INTR.     | .     | .                          | .                               |
| 0 .           | NA | . | .        | .         | .     | .                          | .                               |
| 0 .           | NA | . | .        | .         | .     | .                          | .                               |
| 0 .           | NA | . | .        | .         | .     | .                          | .                               |
| 0 .           | NA | . | .        | .         | .     | .                          | .                               |
| 0 .           | NA | . | .        | .         | .     | .                          | .                               |
| 0 .           | NA | . | RNA      | NUC       | S_AI. | .                          | REACTOME_RNA_POL_II_TRANSCF     |
| 0 .           | NA | . | .        | .         | .     | .                          | .                               |
| 0 Scalp-ear-i | NA | . | .        | .         | .     | .                          | .                               |
| 0 .           | NA | . | .        | .         | .     | .                          | .                               |
| 0 Pitt-Hopkin | NA | . | RNA      | NUC       | TRAI. | PID.                       | REACTOME_DEVELOPMENTAL_BIC      |
| 0 .           | NA | . | .        | .         | .     | .                          | .                               |
| 0 Osteolysis, | NA | . | POS.     | REC       | KEGC. | BIO.                       |                                 |
| 0 .           | NA | . | .        | .         | .     | .                          | .                               |
| 0 .           | NA | . | .        | .         | .     | .                          | REACTOME_TRANSMEMBRANE_TF       |
| 0 .           | NA | . | .        | .         | .     | .                          | .                               |

|              |    |   |                     |            |       |                             |                             |
|--------------|----|---|---------------------|------------|-------|-----------------------------|-----------------------------|
| 0 .          | NA | . | .                   | .          | .     | .                           | REACTOME_SIGNALING_BY_RHO_G |
| 0 .          | NA | . | .                   | .          | .     | .                           | REACTOME_SIGNALING_BY_RHO_G |
| 0 Leukemia,  | NA | . | RNA .               | PRO .      | PID . | .                           | REACTOME_DEVELOPMENTAL_BIC  |
| 0 Leukemia,  | NA | . | RNA .               | PRO .      | PID . | .                           | REACTOME_DEVELOPMENTAL_BIC  |
| 0 .          | NA | . | .                   | .          | .     | .                           | .                           |
| 0 .          | NA | . | .                   | MET KEGC . | .     | .                           | .                           |
| 0 .          | NA | . | .                   | MET KEGC . | .     | .                           | .                           |
| 0 .          | NA | . | RNA .               | TRAI .     | PID . | .                           | .                           |
| 0 .          | NA | . | CHR NUC CHR .       | .          | .     | .                           | .                           |
| 0 .          | NA | . | .                   | .          | .     | .                           | .                           |
| 0 Hemophag   | NA | . | .                   | .          | .     | .                           | .                           |
| 0 {Reduced I | NA | . | REG EXTIENZ' KEGC . | .          | .     | .                           | REACTOME_DEVELOPMENTAL_BIC  |
| 0 .          | NA | . | .                   | .          | .     | .                           | .                           |
| 0 .          | NA | . | .                   | .          | .     | .                           | .                           |
| 0 .          | NA | . | MEM .               | .          | .     | .                           | REACTOME_O_LINKED_GLYCOSYL  |
| 0 .          | NA | . | MEM .               | .          | .     | .                           | REACTOME_O_LINKED_GLYCOSYL  |
| 0 .          | NA | . | MEM .               | .          | .     | .                           | REACTOME_O_LINKED_GLYCOSYL  |
| 0 .          | NA | . | MEM .               | .          | .     | .                           | REACTOME_O_LINKED_GLYCOSYL  |
| 0 .          | NA | . | .                   | TRAI .     | .     | .                           | .                           |
| 0 .          | NA | . | .                   | .          | .     | .                           | REACTOME_GENERIC_TRANSCRIP  |
| 0 .          | NA | . | EST/ .              | .          | .     | .                           | .                           |
| 0 .          | NA | . | RNA ORGRNA .        | PID .      | BIO   | REACTOME_SMAD2_SMAD3_SMAD   |                             |
| 0 .          | NA | . | .                   | .          | .     | .                           | .                           |
| 0 .          | NA | . | .                   | .          | .     | .                           | .                           |
| 0 Thyroid dy | NA | . | INTRINOF .          | .          | .     | .                           | REACTOME_METABOLISM_OF_AMI  |
| 0 .          | NA | . | .                   | .          | .     | .                           | .                           |
| 0 .          | NA | . | .                   | .          | .     | .                           | .                           |
| 0 .          | NA | . | .                   | .          | .     | .                           | .                           |
| 0 .          | NA | . | .                   | .          | .     | .                           | .                           |
| 0 .          | NA | . | .                   | .          | .     | .                           | .                           |
| 0 .          | NA | . | .                   | .          | .     | .                           | .                           |
| 0 .          | NA | . | .                   | .          | .     | .                           | .                           |
| 0 .          | NA | . | .                   | .          | .     | .                           | .                           |
| 0 .          | NA | . | .                   | .          | .     | .                           | .                           |
| 0 .          | NA | . | CELI MEM RAS KEGC   | PID .      | BIO   | REACTOME_SIGNALLING_BY_NGF; |                             |
| 0 .          | NA | . | GLU' KEGC .         | .          | .     | REACTOME_TRANSMISSION_ACRC  |                             |
| 0 .          | NA | . | GLU' KEGC .         | .          | .     | REACTOME_TRANSMISSION_ACRC  |                             |
| 0 .          | NA | . | .                   | .          | .     | .                           | .                           |
| 0 .          | NA | . | BEH.CELI ENZ' KEGC  | PID .      | .     | REACTOME_METABOLISM_OF_PRC  |                             |
| 0 .          | NA | . | BEH.CELI ENZ' KEGC  | PID .      | .     | REACTOME_METABOLISM_OF_PRC  |                             |
| 0 .          | NA | . | .                   | .          | .     | .                           | .                           |
| 0 .          | NA | . | SYS' .              | TRAI .     | .     | .                           | .                           |
| 0 .          | NA | . | .                   | .          | .     | .                           | .                           |
| 0 .          | NA | . | .                   | .          | .     | .                           | REACTOME_GENERIC_TRANSCRIP  |
| 0 .          | NA | . | .                   | .          | .     | .                           | .                           |
| 0 .          | NA | . | REG NUC REC KEGC .  | .          | .     | .                           | .                           |
| 0 .          | NA | . | SMA .               | .          | .     | .                           | .                           |
| 0 .          | NA | . | SMA .               | .          | .     | .                           | .                           |
| 0 .          | NA | . | SIGN INTR .         | .          | .     | REACTOME_CELL_CELL_COMMUNI  |                             |
| 0 Spinoceret | NA | . | .                   | .          | .     | .                           | .                           |
| 0 .          | NA | . | .                   | .          | .     | .                           | .                           |

|                |    |       |               |             |                            |                                 |   |
|----------------|----|-------|---------------|-------------|----------------------------|---------------------------------|---|
| 0 .            | NA | .     | .             | .           | KEGC.                      | .                               | . |
| 0 Epileptic ei | NA | .     | .             | CYT(        | KEG(PID,BIO                | REACTOME_GASTRIN_CREB_SIGN      |   |
| 0 .            | NA | .     | .             | .           | .                          | .                               | . |
| 0 .            | NA | .     | .             | .           | .                          | .                               | . |
| 0 .            | NA | .     | .             | .           | .                          | .                               | . |
| 0 .            | NA | .     | .             | .           | .                          | .                               | . |
| 0 .            | NA | .     | SYS           | .           | KEG(PID,BIO                | REACTOME_SIGNALING_BY_ILS;RE    |   |
| 0 .            | NA | .     | RNA NUC TRAI. | .           | PID.                       | REACTOME_DEVELOPMENTAL_BIC      |   |
| 0 .            | NA | .     | RNA NUC TRAI. | .           | PID.                       | REACTOME_DEVELOPMENTAL_BIC      |   |
| 0 .            | NA | .     | .             | .           | .                          | .                               | . |
| 0 .            | NA | .     | .             | .           | PID.                       | .                               | . |
| 0 .            | NA | .     | .             | .           | .                          | .                               | . |
| 0 .            | NA | .     | .             | .           | .                          | .                               | . |
| 0 .            | NA | .     | .             | .           | .                          | BIO.                            | . |
| 0 .            | NA | .     | .             | .           | .                          | .                               | . |
| 0 .            | NA | .     | .             | .           | .                          | .                               | . |
| 0 .            | NA | .     | .             | .           | .                          | .                               | . |
| 0 .            | NA | .     | .             | .           | .                          | .                               | . |
| 0 .            | NA | .     | .             | .           | .                          | .                               | . |
| 0 .            | NA | .     | .             | .           | .                          | .                               | . |
| 0 .            | NA | .     | .             | .           | .                          | .                               | . |
| 0 .            | NA | .     | .             | .           | .                          | .                               | . |
| 0 .            | NA | .     | .             | .           | .                          | .                               | . |
| 0 .            | NA | .     | .             | .           | .                          | .                               | . |
| 0 .            | NA | .     | .             | .           | .                          | .                               | . |
| 0 Homocystil   | NA | CM9 . | CYT(          | HYD         | KEGC.                      | REACTOME_SULFUR_AMINO_ACID      |   |
| 0 .            | NA | .     | .             | .           | .                          | .                               | . |
| 0 Knobloch s   | NA | .     | SYS           | PRO.        | PID.                       | .                               | . |
| 0 .            | NA | .     | .             | .           | .                          | .                               | . |
| 0 .            | NA | .     | .             | .           | .                          | .                               | . |
| 0 .            | NA | .     | .             | .           | .                          | .                               | . |
| 0 .            | NA | .     | .             | .           | .                          | .                               | . |
| 0 Hyperprolir  | NA | CM0 . | .             | OXIL        | KEGC.                      | REACTOME_METABOLISM_OF_AMI      |   |
| 0 .            | NA | .     | .             | .           | .                          | .                               | . |
| 0 .            | NA | .     | .             | .           | .                          | .                               | . |
| 0 .            | NA | .     | .             | .           | .                          | .                               | . |
| 0 .            | NA | .     | .             | .           | .                          | .                               | . |
| 0 .            | NA | .     | ANA           | .           | .                          | .                               | . |
| 0 .            | NA | .     | EST)CYT(      | .           | PID.                       | .                               | . |
| 0 .            | NA | .     | PAT EXTI.     | .           | KEGC.                      | REACTOME_PRE_NOTCH_EXPRES       |   |
| 0 .            | NA | .     | .             | .           | .                          | .                               | . |
| 0 .            | NA | .     | INTR.         | .           | .                          | .                               | . |
| 0 Nephronoç    | NA | .     | .             | .           | .                          | .                               | . |
| 0 Colorectal   | NA | .     | REG NUC TRAI  | KEG(PID,BIO | REACTOME_DEVELOPMENTAL_BIC |                                 |   |
| 0 .            | NA | .     | RNA .         | RNA .       | .                          | REACTOME_PPARA_ACTIVATES_G      |   |
| 0 .            | NA | .     | .             | .           | KEGC.                      | REACTOME_MEIOSIS;REACTOME_I     |   |
| 0 .            | NA | .     | .             | .           | .                          | .                               | . |
| 0 .            | NA | .     | CELI.         | NUC.        | .                          | .                               | . |
| 0 .            | NA | .     | .             | .           | KEGC.                      | .                               | . |
| 0 .            | NA | .     | .             | .           | KEGC.                      | .                               | . |
| 0 .            | NA | .     | .             | .           | .                          | .                               | . |
| 0 .            | NA | .     | GAMORG.       | .           | .                          | .                               | . |
| 0 .            | NA | .     | .             | .           | .                          | .                               | . |
| 0 .            | NA | .     | POS .         | RNA         | KEGC.                      | BIO REACTOME_TRAFFICKING_AND_PI |   |











|    |              |    |                    |                    |                            |                            |   |   |
|----|--------------|----|--------------------|--------------------|----------------------------|----------------------------|---|---|
| 0. | NA           | .  | .                  | .                  | .                          | .                          | . | . |
| 0. | NA           | .  | RES.               | .                  | .                          | .                          | . | . |
| 0. | NA           | .  | .                  | .                  | .                          | .                          | . | . |
| 0. | NA           | .  | IMMI INTR.         | KEGCPID.           | .                          | .                          | . | . |
| 0. | NA           | .  | .                  | .                  | .                          | .                          | . | . |
| 0. | NA           | .  | .                  | .                  | .                          | .                          | . | . |
| 0. | NA           | .  | SEN.ORG.           | .                  | .                          | .                          | . | . |
| 0. | NA           | .  | .                  | .                  | .                          | .                          | . | . |
| 0. | NA           | .  | .                  | .                  | .                          | .                          | . | . |
| 0. | NA           | .  | SIGNINTR REC KEGC. | .                  | .                          | REACTOME_IMMUNOREGULATORY  | . | . |
| 0. | NA           | .  | .                  | .                  | .                          | .                          | . | . |
| 0. | NA           | .  | RNA NUC TRAI.      | PID.               | .                          | REACTOME_DEVELOPMENTAL_BIC | . | . |
| 0. | NA           | .  | .                  | .                  | .                          | .                          | . | . |
| 0. | NA           | .  | .                  | .                  | .                          | .                          | . | . |
| 0. | NA           | .  | .                  | .                  | .                          | .                          | . | . |
| 0. | NA           | .  | .                  | .                  | .                          | .                          | . | . |
| 0. | NA           | .  | .                  | .                  | .                          | .                          | . | . |
| 0. | NA           | .  | .                  | .                  | .                          | .                          | . | . |
| 0. | NA           | .  | .                  | .                  | .                          | .                          | . | . |
| 0. | NA           | .  | .                  | .                  | .                          | .                          | . | . |
| 0. | NA           | .  | .                  | .                  | .                          | .                          | . | . |
| 0. | NA           | .  | .                  | .                  | .                          | .                          | . | . |
| 0. | NA           | .  | CELI NON ACTI KEGC | PID.               | .                          | .                          | . | . |
| 0  | Mental retz  | NA | .                  | .                  | .                          | .                          | . | . |
| 0. | NA           | .  | .                  | .                  | .                          | .                          | . | . |
| 0. | NA           | .  | .                  | .                  | .                          | .                          | . | . |
| 0. | NA           | .  | .                  | .                  | .                          | .                          | . | . |
| 0. | NA           | .  | .                  | .                  | .                          | .                          | . | . |
| 0. | NA           | .  | .                  | .                  | .                          | .                          | . | . |
| 0. | NA           | .  | .                  | .                  | .                          | .                          | . | . |
| 0. | NA           | .  | .                  | .                  | .                          | .                          | . | . |
| 0. | NA           | .  | .                  | .                  | .                          | .                          | . | . |
| 0. | NA           | .  | .                  | .                  | .                          | .                          | . | . |
| 0. | NA           | .  | .                  | .                  | .                          | .                          | . | . |
| 0. | NA           | .  | .                  | .                  | .                          | .                          | . | . |
| 0. | NA           | .  | .                  | .                  | .                          | .                          | . | . |
| 0. | NA           | .  | .                  | .                  | .                          | .                          | . | . |
| 0. | NA           | .  | .                  | .                  | .                          | .                          | . | . |
| 0. | NA           | .  | .                  | .                  | .                          | .                          | . | . |
| 0. | NA           | .  | .                  | .                  | .                          | .                          | . | . |
| 0. | NA           | .  | .                  | .                  | .                          | .                          | . | . |
| 0. | NA           | .  | .                  | .                  | .                          | .                          | . | . |
| 0. | NA           | .  | .                  | .                  | .                          | .                          | . | . |
| 0. | NA           | .  | .                  | .                  | .                          | .                          | . | . |
| 0. | NA           | .  | POS.               | .                  | .                          | REACTOME_ACTIVATED_NOTCH1_ | . | . |
| 0. | NA           | .  | REG CYT(NUC.       | PID.BIO.           | .                          | .                          | . | . |
| 0. | NA           | .  | REG CYT(NUC.       | PID.BIO.           | .                          | .                          | . | . |
| 0. | NA           | .  | REG CYT(NUC.       | PID.BIO.           | .                          | .                          | . | . |
| 0. | NA           | .  | REG CYT(NUC.       | PID.BIO.           | .                          | .                          | . | . |
| 0  | {Epilepsy, ( | NA | .                  | SIGNINTR GAB KEGC. | .                          | .                          | . | . |
| 0. | NA           | .  | CELI MEM PHO KEGC  | PID.BIO            | REACTOME_TGF_BETA_RECEPTOI | .                          | . | . |

|               |    |   |         |         |           |     |                             |
|---------------|----|---|---------|---------|-----------|-----|-----------------------------|
| 0 Peroxisom   | NA | . | EST CYT | KEGC.   | .         | .   | .                           |
| 0 .           | NA | . | .       | .       | .         | .   | .                           |
| 0 .           | NA | . | DNA     | CYT HYD | KEGC PID  | BIO | REACTOME_APOPTOSIS_INDUCED  |
| 0 Nephronoç   | NA | . | .       | .       | .         | .   | REACTOME_SIGNALING_BY_HIPPC |
| 0 Nephronoç   | NA | . | .       | .       | .         | .   | REACTOME_SIGNALING_BY_HIPPC |
| 0 .           | NA | . | .       | .       | .         | .   | .                           |
| 0 .           | NA | . | .       | .       | .         | .   | .                           |
| 0 .           | NA | . | .       | .       | .         | .   | .                           |
| 0 .           | NA | . | .       | .       | .         | .   | .                           |
| 0 .           | NA | . | .       | .       | .         | .   | .                           |
| 0 .           | NA | . | .       | .       | .         | .   | .                           |
| 0 .           | NA | . | .       | .       | .         | .   | .                           |
| 0 .           | NA | . | .       | .       | .         | .   | .                           |
| 0 .           | NA | . | .       | .       | .         | .   | REACTOME_TRANSMEMBRANE_TF   |
| 0 .           | NA | . | .       | .       | .         | .   | .                           |
| 0 .           | NA | . | .       | .       | .         | .   | .                           |
| 0 .           | NA | . | .       | .       | .         | .   | .                           |
| 0 .           | NA | . | .       | .       | .         | .   | .                           |
| 0 Ehlere-Dar  | NA | . | SYS     | PRO     | KEGC.     | .   | REACTOME_EXTRACELLULAR_MAT  |
| 0 .           | NA | . | POS     | REC     | KEGC.     | .   | .                           |
| 0 .           | NA | . | .       | .       | .         | .   | .                           |
| 0 .           | NA | . | .       | .       | .         | .   | .                           |
| 0 .           | NA | . | .       | .       | .         | .   | .                           |
| 0 .           | NA | . | .       | .       | .         | .   | .                           |
| 0 .           | NA | . | .       | .       | .         | .   | .                           |
| 0 .           | NA | . | REG     | ENZ     | KEGC PID  | BIO | REACTOME_SIGNALLING_BY_NGF; |
| 0 Cataract 6, | NA | . | SIGN    | INTR    | KEGC PID  | .   | .                           |
| 0 .           | NA | . | .       | .       | .         | BIO | .                           |
| 0 .           | NA | . | .       | .       | .         | .   | .                           |
| 0 .           | NA | . | .       | .       | .         | .   | .                           |
| 0 .           | NA | . | .       | .       | .         | .   | .                           |
| 0 .           | NA | . | .       | .       | .         | .   | .                           |
| 0 .           | NA | . | .       | .       | .         | .   | .                           |
| 0 Parkinson   | NA | . | .       | .       | .         | .   | .                           |
| 0 .           | NA | . | .       | .       | .         | .   | .                           |
| 0 .           | NA | . | DET     | TAS     | KEGC.     | .   | REACTOME_SIGNALING_BY_GPCR  |
| 0 .           | NA | . | .       | .       | .         | .   | REACTOME_IMMUNE_SYSTEM;REA  |
| 0 .           | NA | . | .       | .       | .         | .   | REACTOME_IMMUNE_SYSTEM;REA  |
| 0 .           | NA | . | .       | .       | .         | .   | .                           |
| 0 .           | NA | . | .       | .       | .         | .   | .                           |
| 0 .           | NA | . | .       | .       | .         | .   | .                           |
| 0 .           | NA | . | SIGN    | CYT GTP | .         | .   | REACTOME_RAP1_SIGNALLING;RE |
| 0 Dyssegme    | NA | . | .       | .       | KEGC.     | .   | REACTOME_HS_GAG_DEGRADATI   |
| 0 Dyssegme    | NA | . | .       | .       | KEGC.     | .   | REACTOME_HS_GAG_DEGRADATI   |
| 0 .           | NA | . | .       | .       | .         | .   | .                           |
| 0 .           | NA | . | STEI    | SER     | .         | .   | .                           |
| 0 .           | NA | . | .       | .       | .         | .   | .                           |
| 0 Galactose   | NA | . | .       | .       | KEGC.     | .   | REACTOME_METABOLISM_OF_CAF  |
| 0 HMG-CoA     | NA | . | .       | .       | KEGC.     | .   | REACTOME_METABOLISM_OF_LIPI |
| 0 .           | NA | . | RNA     | TRAI    | PID       | .   | .                           |
| 0 Rh-null dis | NA | . | .       | INTR    | .         | .   | .                           |
| 0 .           | NA | . | GLY     | ORG     | CAT KEGC. | .   | REACTOME_METABOLISM_OF_PRC  |
| 0 .           | NA | . | SIGN    | TUBI    | KEGC PID  | .   | .                           |
| 0 .           | NA | . | .       | .       | .         | .   | .                           |
| 0 .           | NA | . | ENZ     | CELI    | PRO       | PID | .                           |

|     |              |    |       |           |             |                              |                            |                             |   |
|-----|--------------|----|-------|-----------|-------------|------------------------------|----------------------------|-----------------------------|---|
| 0 . | NA           | .  | .     | .         | .           | .                            | .                          | .                           | . |
| 0 . | NA           | .  | SIGN. | PHO       | KEG(PID.BIO | REACTOME_SIGNALLING_BY_NGF;  |                            |                             |   |
| 0   | Mental retz  | NA | .     | RNA       | NUC         | TRAI.                        | .                          | .                           | . |
| 0 . | NA           | .  | .     | .         | .           | .                            | .                          | .                           | . |
| 0 . | NA           | .  | REG   | INTRCATI  | KEG(PID.    | REACTOME_HYALURONAN_UPTAK    |                            |                             |   |
| 0 . | NA           | .  | REG   | INTRCATI  | KEG(PID.    | REACTOME_HYALURONAN_UPTAK    |                            |                             |   |
| 0 . | NA           | .  | .     | .         | .           | .                            | .                          | .                           | . |
| 0 . | NA           | .  | ANA   | .         | .           | .                            | .                          | .                           | . |
| 0 . | NA           | .  | IMMI  | .         | .           | .                            | .                          | .                           | . |
| 0 . | NA           | .  | NEG.  | .         | KEGC.       | .                            | .                          | .                           | . |
| 0 . | NA           | .  | .     | .         | .           | .                            | .                          | .                           | . |
| 0 . | NA           | .  | .     | .         | .           | .                            | .                          | .                           | . |
| 0   | SCID due 1   | NA | .     | REG       | ORG         | PRO                          | KEG(PID.BIO                | REACTOME_SIGNALING_BY_SCF_h |   |
| 0 . | NA           | .  | .     | .         | .           | .                            | .                          | .                           | . |
| 0 . | NA           | .  | .     | NUC       | .           | .                            | .                          | .                           | . |
| 0 . | NA           | .  | MUL   | .         | DNA         | .                            | .                          | .                           | . |
| 0   | Palmoplan    | NA | .     | .         | .           | .                            | PID.                       | .                           | . |
| 0 . | NA           | .  | .     | .         | .           | .                            | .                          | .                           | . |
| 0 . | NA           | .  | .     | .         | .           | .                            | .                          | .                           | . |
| 0 . | NA           | .  | .     | CYT       | .           | .                            | .                          | .                           | . |
| 0 . | NA           | .  | .     | CYT       | .           | .                            | .                          | .                           | . |
| 0 . | NA           | .  | .     | CYT       | .           | .                            | .                          | .                           | . |
| 0 . | NA           | .  | .     | .         | .           | .                            | .                          | .                           | . |
| 0 . | NA           | .  | REG   | CYT       | MRN.        | .                            | .                          | .                           | . |
| 0   | Ceroid lipo  | NA | .     | REG       | AXO         | THIC                         | KEGC.                      | .                           | . |
| 0 . | NA           | .  | .     | .         | CATI        | .                            | .                          | .                           | . |
| 0 . | NA           | .  | .     | .         | CATI        | .                            | .                          | .                           | . |
| 0   | Deafness,    | NA | .     | EST,      | .           | .                            | .                          | REACTOME_NEURONAL_SYSTEM;F  |   |
| 0   | Deafness,    | NA | .     | EST,      | .           | .                            | .                          | REACTOME_NEURONAL_SYSTEM;F  |   |
| 0 . | NA           | .  | .     | .         | .           | .                            | .                          | .                           | . |
| 0 . | NA           | .  | RNA   | .         | SING.       | PID.                         | REACTOME_PROCESSING_OF_CAF |                             |   |
| 0 . | NA           | .  | .     | NUC       | .           | .                            | REACTOME_DEVELOPMENTAL_BIC |                             |   |
| 0 . | NA           | .  | .     | .         | .           | .                            | .                          | .                           | . |
| 0 . | NA           | .  | BIOF. | PHO.      | PID.        | .                            | .                          | .                           | . |
| 0 . | NA           | .  | .     | .         | .           | .                            | .                          | .                           | . |
| 0   | Adenocarc    | NA | .     | DNA       | NUC.        | KEGC.                        | .                          | .                           | . |
| 0   | Spastic pai  | NA | .     | CAR       | INSC        | HYD.                         | .                          | .                           | . |
| 0 . | NA           | .  | BIOF. | NUC       | KEG(PID.BIO | REACTOME_SPRY_REGULATION_C   |                            |                             |   |
| 0 . | NA           | .  | .     | .         | .           | .                            | .                          | .                           | . |
| 0 . | NA           | .  | .     | .         | .           | .                            | .                          | .                           | . |
| 0 . | NA           | .  | .     | .         | .           | .                            | .                          | .                           | . |
| 0   | {Myocardia   | NA | .     | EST,      | REC.        | PID.                         | REACTOME_PLATELET_HOMEOST, |                             |   |
| 0 . | NA           | .  | RNA   | NUC       | SPE         | .                            | .                          | .                           | . |
| 0 . | NA           | .  | .     | .         | .           | .                            | .                          | .                           | . |
| 0   | Hyperchole   | NA | .     | REG       | EXTI        | SER .                        | .                          | .                           | . |
| 0 . | NA           | .  | BIOF. | .         | KEG(PID.BIO | REACTOME_ACTIVATED_AMPK_ST   |                            |                             |   |
| 0   | Ciliary dyst | NA | .     | .         | .           | PID.                         | .                          | .                           | . |
| 0 . | NA           | .  | .     | .         | KEG(PID.BIO | REACTOME_IL_7_SIGNALING;REAC |                            |                             |   |
| 0 . | NA           | .  | .     | .         | .           | .                            | .                          | .                           | . |
| 0 . | NA           | .  | CELI  | CYT       | KEGC.       | .                            | .                          | .                           | . |
| 0 . | NA           | .  | PRO   | ORGLIPII  | KEGC.       | REACTOME_METABOLISM_OF_PRC   |                            |                             |   |
| 0 . | NA           | .  | .     | INTRG_PI. | .           | .                            | .                          | .                           | . |
| 0 . | NA           | .  | .     | .         | .           | .                            | .                          | .                           | . |

|                |    |   |   |                             |                             |                             |                             |
|----------------|----|---|---|-----------------------------|-----------------------------|-----------------------------|-----------------------------|
| 0 .            | NA | . | . | INTRG_PI.                   | .                           | .                           | .                           |
| 0 .            | NA | . | . | REG INTR LIPII KEGC(PID,BIO | REACTOME_GASTRIN_CREB_SIGN  |                             |                             |
| 0 .            | NA | . | . | .                           | .                           | .                           | .                           |
| 0 .            | NA | . | . | ENZ' INTR CAR .             | PID,BIO .                   |                             |                             |
| 0 Cone-rod c   | NA | . | . | EST/ CELI NUC KEGC( .       | REACTOME_ABC_FAMILY_PROTEIN |                             |                             |
| 0 Cone-rod c   | NA | . | . | EST/ CELI NUC KEGC( .       | REACTOME_ABC_FAMILY_PROTEIN |                             |                             |
| 0 .            | NA | . | . | .                           | .                           | .                           | .                           |
| 0 Fibrochonc   | NA | . | . | SYS' PRO .                  | KEGC(PID .                  | REACTOME_EXTRACELLULAR_MAT  |                             |
| 0 .            | NA | . | . | .                           | KEGC( .                     | .                           | .                           |
| 0 .            | NA | . | . | .                           | .                           | .                           | .                           |
| 0 .            | NA | . | . | .                           | .                           | .                           | .                           |
| 0 Megakaryc    | NA | . | . | .                           | .                           | .                           | .                           |
| 0 .            | NA | . | . | AMIP .                      | CAR KEGC( .                 | .                           | .                           |
| 0 .            | NA | . | . | .                           | .                           | .                           | .                           |
| 0 .            | NA | . | . | .                           | .                           | .                           | .                           |
| 0 .            | NA | . | . | .                           | .                           | REACTOME_PRE_NOTCH_TRANSC   |                             |
| 0 .            | NA | . | . | POS .                       | HYD .                       | PID .                       | REACTOME_SIGNALING_BY_RHO_( |
| 0 .            | NA | . | . | .                           | .                           | KEGC(PID .                  | .                           |
| 0 Myoadenyl    | NA | . | . | .                           | HYD KEGC( .                 | REACTOME_METABOLISM_OF_NUC  |                             |
| 0 Myoadenyl    | NA | . | . | .                           | HYD KEGC( .                 | REACTOME_METABOLISM_OF_NUC  |                             |
| 0 Bamforth-L   | NA | . | . | RNA NUC HYD .               | .                           | .                           | .                           |
| 0 .            | NA | . | . | .                           | NUC .                       | .                           | .                           |
| 0 .            | NA | . | . | .                           | .                           | .                           | .                           |
| 0 Alagille syr | NA | . | . | REG INTR SPE(KEGC(PID .     | REACTOME_PRE_NOTCH_TRANSC   |                             |                             |
| 0 Alagille syr | NA | . | . | REG INTR SPE(KEGC(PID .     | REACTOME_PRE_NOTCH_TRANSC   |                             |                             |
| 0 .            | NA | . | . | .                           | .                           | .                           | .                           |
| 0 .            | NA | . | . | .                           | .                           | .                           | .                           |
| 0 .            | NA | . | . | .                           | .                           | .                           | .                           |
| 0 .            | NA | . | . | .                           | .                           | .                           | .                           |
| 0 .            | NA | . | . | EST/ .                      | KEGC( .                     | .                           | .                           |
| 0 .            | NA | . | . | .                           | .                           | .                           | .                           |
| 0 .            | NA | . | . | .                           | .                           | .                           | .                           |
| 0 .            | NA | . | . | RNA NUC NUC KEGC( .         | REACTOME_RNA_POL_III_TRANSC |                             |                             |
| 0 .            | NA | . | . | .                           | .                           | .                           | .                           |
| 0 .            | NA | . | . | .                           | .                           | .                           | .                           |
| 0 .            | NA | . | . | .                           | KEGC( .                     | REACTOME_MITOCHONDRIAL_TRN  |                             |
| 0 .            | NA | . | . | PHO CYT( PHO KEGC(PID .     | REACTOME_SYNTHESIS_OF_PIPS_ |                             |                             |
| 0 .            | NA | . | . | .                           | .                           | .                           | .                           |
| 0 .            | NA | . | . | .                           | .                           | .                           | .                           |
| 0 .            | NA | . | . | MUL .                       | REC .                       | .                           | .                           |
| 0 .            | NA | . | . | .                           | .                           | .                           | .                           |
| 0 .            | NA | . | . | RNA NUC .                   | .                           | .                           | .                           |
| 0 .            | NA | . | . | .                           | .                           | .                           | .                           |
| 0 .            | NA | . | . | .                           | KEGC( .                     | REACTOME_IMMUNE_SYSTEM;REA  |                             |
| 0 .            | NA | . | . | .                           | INTR .                      | REACTOME_MITOCHONDRIAL_PRC  |                             |
| 0 .            | NA | . | . | RNA CELI RNA KEGC( .        | .                           | .                           | .                           |
| 0 .            | NA | . | . | .                           | .                           | .                           | .                           |
| 0 .            | NA | . | . | RNA NUC TRAI .              | REACTOME_CELL_CYCLE;REACTO  |                             |                             |
| 0 .            | NA | . | . | RNA .                       | RAS,KEGC(PID,BIO            | REACTOME_SIGNALING_BY_RHO_( |                             |
| 0 .            | NA | . | . | .                           | .                           | .                           | .                           |
| 0 .            | NA | . | . | .                           | .                           | .                           | .                           |
| 0 .            | NA | . | . | .                           | INTR .                      | KEGC( .                     | .                           |
| 0 .            | NA | . | . | DEFI .                      | .                           | PID .                       | REACTOME_INNATE_IMMUNE_SYS  |

|                |    |   |              |      |     |     |      |     |                             |   |
|----------------|----|---|--------------|------|-----|-----|------|-----|-----------------------------|---|
| 0 .            | NA | . | SYS          | .    | .   | .   | .    | .   | .                           | . |
| 0 .            | NA | . | .            | .    | .   | .   | .    | .   | .                           | . |
| 0 .            | NA | . | REG          | .    | GTP | .   | .    | .   | REACTOME_SIGNALING_BY_GPCR  | . |
| 0 Leukemia,    | NA | . | RNA NUC      | .    | .   | PID | .    | .   | .                           | . |
| 0 .            | NA | . | NEG NUC TRAI | .    | .   | PID | .    | .   | REACTOME_RNA_POL_III_TRANSC | . |
| 0 .            | NA | . | .            | .    | .   | .   | .    | .   | .                           | . |
| 0 Platelet alp | NA | . | .            | ORG  | .   | KEG | (PID | BIO | REACTOME_CELL_SURFACE_INTEI | . |
| 0 .            | NA | . | .            | CYT  | .   | .   | .    | .   | .                           | . |
| 0 .            | NA | . | .            | .    | .   | .   | .    | .   | .                           | . |
| 0 .            | NA | . | PRO          | .    | MET | .   | .    | .   | REACTOME_DIABETES_PATHWAYS  | . |
| 0 .            | NA | . | .            | .    | .   | .   | .    | .   | .                           | . |
| 0 Leukemia,    | NA | . | BIOF         | .    | CAT | KEG | (C   | .   | REACTOME_DEVELOPMENTAL_BIC  | . |
| 0 Nephrotic s  | NA | . | EST/INTR     | .    | .   | PID | .    | .   | .                           | . |
| 0 .            | NA | . | .            | .    | .   | .   | .    | .   | .                           | . |
| 0 .            | NA | . | CELI MEN     | CAT  | KEG | (C  | .    | .   | .                           | . |
| 0 .            | NA | . | .            | .    | .   | .   | .    | .   | .                           | . |
| 0 .            | NA | . | .            | .    | .   | .   | .    | .   | .                           | . |
| 0 .            | NA | . | .            | .    | .   | KEG | (C   | .   | .                           | . |
| 0 .            | NA | . | NUC ORG      | .    | .   | KEG | (C   | .   | REACTOME_METABOLISM_OF_NOI  | . |
| 0 Leber cong   | NA | . | ANA          | .    | .   | .   | .    | .   | .                           | . |
| 0 .            | NA | . | .            | .    | .   | .   | .    | .   | .                           | . |
| 0 .            | NA | . | .            | .    | .   | .   | .    | .   | .                           | . |
| 0 Hypokalem    | NA | . | SYS          | MEM  | CAT | KEG | (C   | .   | REACTOME_DEVELOPMENTAL_BIC  | . |
| 0 .            | NA | . | .            | .    | .   | .   | .    | .   | .                           | . |
| 0 .            | NA | . | EST/ORG      | .    | .   | .   | .    | .   | REACTOME_MITOCHONDRIAL_PRC  | . |
| 0 .            | NA | . | .            | .    | .   | KEG | (C   | .   | REACTOME_PHOSPHOLIPID_META  | . |
| 0 ?Epilepsy,   | NA | . | .            | INTR | .   | KEG | (C   | .   | REACTOME_DEVELOPMENTAL_BIC  | . |
| 0 .            | NA | . | .            | .    | .   | KEG | (PID | .   | REACTOME_REGULATION_OF_COM  | . |
| 0 .            | NA | . | .            | .    | .   | .   | .    | .   | .                           | . |
| 0 .            | NA | . | .            | .    | .   | KEG | (C   | .   | REACTOME_DEVELOPMENTAL_BIC  | . |
| 0 Cortisone r  | NA | . | .            | .    | .   | KEG | (C   | .   | REACTOME_METABOLISM_OF_STE  | . |
| 0 .            | NA | . | .            | .    | .   | .   | .    | .   | .                           | . |
| 0 .            | NA | . | .            | .    | .   | .   | .    | .   | .                           | . |
| 0 Ataxia, pos  | NA | . | EST/INTR     | .    | .   | .   | .    | .   | REACTOME_TRANSMEMBRANE_TF   | . |
| 0 .            | NA | . | SIGM         | .    | PHO | .   | .    | .   | .                           | . |
| 0 Choanal at   | NA | . | BIOF         | .    | PRO | .   | .    | .   | .                           | . |
| 0 Choanal at   | NA | . | BIOF         | .    | PRO | .   | .    | .   | .                           | . |
| 0 Retinitis pi | NA | . | REG PRO      | PRO  | .   | .   | .    | .   | .                           | . |
| 0 Retinitis pi | NA | . | REG PRO      | PRO  | .   | .   | .    | .   | .                           | . |
| 0 Retinitis pi | NA | . | REG PRO      | PRO  | .   | .   | .    | .   | .                           | . |
| 0 .            | NA | . | RNA          | .    | PRO | .   | .    | .   | REACTOME_GENERIC_TRANSCRIP  | . |
| 0 Hyperman     | NA | . | .            | .    | .   | .   | .    | .   | .                           | . |
| 0 .            | NA | . | .            | .    | .   | KEG | (C   | .   | REACTOME_MITOCHONDRIAL_TRN  | . |
| 0 .            | NA | . | .            | .    | .   | KEG | (C   | .   | REACTOME_MITOCHONDRIAL_TRN  | . |
| 0 .            | NA | . | .            | .    | .   | .   | .    | .   | .                           | . |
| 0 .            | NA | . | .            | .    | .   | .   | .    | .   | .                           | . |
| 0 .            | NA | . | .            | NUC  | NUC | .   | .    | .   | .                           | . |
| 0 .            | NA | . | .            | .    | .   | .   | .    | .   | .                           | . |
| 0 Left-right a | NA | . | ENZ          | .    | .   | KEG | (C   | .   | REACTOME_DEVELOPMENTAL_BIC  | . |
| 0 .            | NA | . | .            | .    | .   | .   | .    | .   | .                           | . |
| 0 Coenzyme     | NA | . | .            | .    | .   | .   | .    | .   | .                           | . |
| 0 .            | NA | . | .            | .    | .   | .   | PID  | .   | REACTOME_SIGNALING_BY_RHO_  | . |
| 0 .            | NA | . | .            | .    | .   | .   | .    | .   | .                           | . |
| 0 .            | NA | . | PRO          | .    | PRO | .   | .    | .   | .                           | . |

|   |            |                    |                |         |                              |
|---|------------|--------------------|----------------|---------|------------------------------|
| 0 | NA         | EST/INTRCATI.      | KEGC.          | BIO.    | REACTOME_NEURONAL_SYSTEM;F   |
| 0 | Arrhythmoc | REG MEM/           | CATI/KEGC.     | BIO.    |                              |
| 0 | NA         |                    |                |         |                              |
| 0 | Megalence  | BIOF.              | KEGC(PID.      |         | REACTOME_SIGNALLING_BY_NGF;  |
| 0 | NA         |                    |                |         |                              |
| 0 | NA         |                    |                |         | REACTOME_GENERIC_TRANSCRIP   |
| 0 | NA         |                    |                |         |                              |
| 0 | Thrombocy  | INTR.              | KEGC.          |         | REACTOME_METABOLISM_OF_AMI   |
| 0 | NA         |                    |                |         |                              |
| 0 | NA         |                    |                |         |                              |
| 0 | NA         |                    |                |         |                              |
| 0 | NA         |                    |                |         |                              |
| 0 | NA         |                    | KEGC.          |         | REACTOME_ACYL_CHAIN_REMODE   |
| 0 | Inflammatc | CELI INTR.         | KEGC(PID.BIO   |         | REACTOME_SIGNALLING_BY_NGF;  |
| 0 | NA         |                    |                |         |                              |
| 0 | NA         |                    |                |         |                              |
| 0 | NA         |                    |                |         |                              |
| 0 | NA         |                    |                |         |                              |
| 0 | NA         | EST/               | CATI.          |         | REACTOME_NEURONAL_SYSTEM;F   |
| 0 | NA         |                    |                |         |                              |
| 0 | NA         |                    | MOL.           | PID.    |                              |
| 0 | NA         |                    | NUC PRO.       | PID.BIO | REACTOME_DEVELOPMENTAL_BIC   |
| 0 | NA         |                    |                |         |                              |
| 0 | NA         |                    | LIGA/KEGC(PID. |         | REACTOME_METABOLISM_OF_NUC   |
| 0 | NA         |                    | LIGA/KEGC(PID. |         | REACTOME_METABOLISM_OF_NUC   |
| 0 | NA         |                    |                |         |                              |
| 0 | {Neuroblas | SYS INTR TRAI.     |                |         |                              |
| 0 | NA         | CELI.              | KEGC.          |         |                              |
| 0 | NA         |                    |                |         |                              |
| 0 | NA         |                    |                |         |                              |
| 0 | NA         |                    |                | PID.    |                              |
| 0 | NA         | EST/INTRCATI/KEGC. |                |         | REACTOME_TRANSMEMBRANE_TR    |
| 0 | Leigh synd | EST/ORG MICf.      |                |         |                              |
| 0 | NA         |                    |                |         |                              |
| 0 | NA         |                    |                |         |                              |
| 0 | NA         | ORG ACTI.          | PID.           |         | REACTOME_DEVELOPMENTAL_BIC   |
| 0 | NA         | ORG ACTI.          | PID.           |         | REACTOME_DEVELOPMENTAL_BIC   |
| 0 | NA         | SYS ORG.           | PID.           |         | REACTOME_SIGNALLING_BY_NGF;  |
| 0 | Doyme hon  | SEN PRO.           |                |         |                              |
| 0 | NA         |                    |                |         |                              |
| 0 | NA         |                    |                |         |                              |
| 0 | NA         |                    |                |         |                              |
| 0 | NA         | GLU.               | NUC/KEGC.      |         | REACTOME_BIOLOGICAL_OXIDATI  |
| 0 | NA         |                    |                |         | REACTOME_SIGNALING_BY_ILS;RE |
| 0 | NA         |                    |                |         | REACTOME_SIGNALING_BY_RHO_   |
| 0 | GAPO syn   |                    |                | PID.    |                              |
| 0 | NA         |                    | ACTI.          |         |                              |
| 0 | NA         | AMIN.              | KEGC.          |         |                              |
| 0 | Miyoshi mt | SYS MEM.           |                |         |                              |
| 0 | NA         |                    |                |         |                              |
| 0 | NA         |                    |                |         |                              |
| 0 | NA         |                    |                |         |                              |
| 0 | NA         | ISO FORG OXIL      | KEGC.          |         |                              |
| 0 | Pseudoxar  | REG INTR LYA       |                |         | REACTOME_PTM_GAMMA_CARBO     |

|                 |    |  |                |                 |  |                                  |
|-----------------|----|--|----------------|-----------------|--|----------------------------------|
| 0 .             | NA |  | MUS MEM .      | KEGC .          |  |                                  |
| 0 .             | NA |  |                |                 |  |                                  |
| 0 .             | NA |  |                |                 |  |                                  |
| 0 .             | NA |  |                |                 |  |                                  |
| 0 .             | NA |  |                |                 |  |                                  |
| 0 .             | NA |  |                |                 |  |                                  |
| 0 .             | NA |  |                |                 |  |                                  |
| 0 .             | NA |  |                |                 |  |                                  |
| 0 .             | NA |  |                |                 |  |                                  |
| 0 .             | NA |  |                |                 |  |                                  |
| 0 .             | NA |  |                |                 |  |                                  |
| 0 .             | NA |  |                |                 |  |                                  |
| 0 .             | NA |  |                |                 |  |                                  |
| 0 .             | NA |  |                |                 |  |                                  |
| 0 .             | NA |  |                |                 |  |                                  |
| 0 .             | NA |  |                |                 |  |                                  |
| 0 .             | NA |  |                |                 |  |                                  |
| 0 .             | NA |  |                |                 |  |                                  |
| 0 Retinitis pig | NA |  | PRO .          |                 |  |                                  |
| 0 .             | NA |  | RNA ORGHYD     | KEGC .          |  | REACTOME_PROCESSING_OF_CAF       |
| 0 .             | NA |  |                |                 |  |                                  |
| 0 .             | NA |  |                |                 |  |                                  |
| 0 .             | NA |  |                |                 |  |                                  |
| 0 .             | NA |  |                |                 |  |                                  |
| 0 .             | NA |  |                |                 |  |                                  |
| 0 .             | NA |  | MUL NUC .      |                 |  |                                  |
| 0 .             | NA |  | SIGN MEM .     | KEGCPID.BIO .   |  |                                  |
| 0 .             | NA |  | ENZ' MEM SMA . | PID .           |  |                                  |
| 0 .             | NA |  |                |                 |  |                                  |
| 0 Colorectal    | NA |  | MITCORG .      | KEGCPID .       |  | REACTOME_CELL_CYCLE;REACTO       |
| 0 .             | NA |  |                |                 |  |                                  |
| 0 .             | NA |  |                |                 |  |                                  |
| 0 .             | NA |  |                |                 |  |                                  |
| 0 .             | NA |  |                |                 |  |                                  |
| 0 .             | NA |  |                |                 |  |                                  |
| 0 .             | NA |  |                |                 |  |                                  |
| 0 .             | NA |  |                |                 |  |                                  |
| 0 .             | NA |  | CELL .         |                 |  |                                  |
| 0 .             | NA |  | SIGN .         | GTP.KEGCPID .   |  | REACTOME_SIGNALLING_BY_NGF;      |
| 0 Thrombopl     | NA |  | REG .          | SER KEGCPID.BIO |  | REACTOME_PTM_GAMMA_CARBO)        |
| 0 .             | NA |  |                |                 |  |                                  |
| 0 .             | NA |  | LIPII ORGLIPA  | KEGC .          |  | REACTOME_GLYCOSPHINGOLIPID_      |
| 0 .             | NA |  |                |                 |  |                                  |
| 0 .             | NA |  |                |                 |  |                                  |
| 0 .             | NA |  | SIGN INTR .    |                 |  | REACTOME_SIGNALING_BY_GPCR       |
| 0 .             | NA |  |                |                 |  |                                  |
| 0 .             | NA |  | EST  .         |                 |  |                                  |
| 0 NemaLine r    | NA |  | SAR  STRI .    |                 |  | REACTOME_STRIATED_MUSCLE_C       |
| 0 .             | NA |  |                | KEGCPID .       |  | REACTOME_MEMBRANE_TRAFFIC        |
| 0 .             | NA |  |                |                 |  |                                  |
| 0 .             | NA |  |                | KEGC .          |  |                                  |
| 0 .             | NA |  |                |                 |  |                                  |
| 0 .             | NA |  |                |                 |  |                                  |
| 0 .             | NA |  |                |                 |  |                                  |
| 0 .             | NA |  | IMMI .         | SER  .          |  | REACTOME_INTEGRATION_OF_EN       |
| 0 .             | NA |  | IMMI .         | SER  .          |  | REACTOME_INTEGRATION_OF_EN       |
| 0 .             | NA |  |                |                 |  |                                  |
| 0 Cholestasi    | NA |  | EST  INTRCATI  | KEGC .          |  | BIO REACTOME_BILE_ACID_AND_BILE_ |
| 0 Bardet-Bie    | NA |  |                |                 |  |                                  |
| 0 .             | NA |  |                |                 |  |                                  |
| 0 .             | NA |  |                |                 |  |                                  |



|                |    |   |       |       |           |          |                                     |                            |
|----------------|----|---|-------|-------|-----------|----------|-------------------------------------|----------------------------|
| 0 .            | NA | . | .     | .     | KEGC.     | .        | REACTOME_CELL_CYCLE;REACTO          |                            |
| 0 .            | NA | . | SIGN  | CELI  | GTP,KEGC. | .        | REACTOME_INTEGRIN_CELL_SURF         |                            |
| 0 Wiskott-Alr  | NA | . | MAC   | NON   | ACTI.     | PID.     | .                                   |                            |
| 0 Multiple pte | NA | . | REG   | INTR  | CATI      | KEGC     | PID,BIO REACTOME_TRANSMISSION_ACRC  |                            |
| 0 .            | NA | . | .     | .     | .         | .        | .                                   |                            |
| 0 Rhizomelic   | NA | . | BIO   | CYT   | (TRAI     | KEGC.    | REACTOME_PEROXISOMAL_LIPID_         |                            |
| 0 Pigmented    | NA | . | SIGN. | .     | KEGC.     | .        | REACTOME_SIGNALING_BY_GPCR          |                            |
| 0 Cardiomyo    | NA | . | MUS   | ORG   | NUC       | KEGC.    | .                                   |                            |
| 0 .            | NA | . | .     | .     | .         | .        | .                                   |                            |
| 0 .            | NA | . | .     | .     | .         | .        | .                                   |                            |
| 0 .            | NA | . | .     | .     | .         | .        | .                                   |                            |
| 0 .            | NA | . | .     | .     | KEGC      | PID,BIO  | REACTOME_DEVELOPMENTAL_BIC          |                            |
| 0 Ehlers-Dar   | NA | . | SYS   | PRO.  | KEGC      | PID.     | REACTOME_DEVELOPMENTAL_BIC          |                            |
| 0 .            | NA | . | .     | .     | .         | .        | .                                   |                            |
| 0 Candidiasi   | NA | . | RNA   | CYT   | (REC      | KEGC     | PID,BIO REACTOME_SIGNALING_BY_SCF_H |                            |
| 0 .            | NA | . | .     | CYT   | (LIPIE.   | .        | .                                   |                            |
| 0 .            | NA | . | CELI  | NUC   | NUC.      | .        | .                                   |                            |
| 0 .            | NA | . | .     | .     | .         | .        | .                                   |                            |
| 0 3MC syndr    | NA | . | CELI. | PHO.  | .         | .        | .                                   |                            |
| 0 .            | NA | . | .     | .     | .         | .        | .                                   |                            |
| 0 .            | NA | . | .     | .     | .         | .        | .                                   |                            |
| 0 .            | NA | . | .     | .     | .         | .        | REACTOME_TRANSLATION;REACTO         |                            |
| 0 .            | NA | . | SYS   | INTR  | INTE.     | .        | .                                   |                            |
| 0 Cataract 4,  | NA | . | SEN.  | .     | .         | .        | .                                   |                            |
| 0 .            | NA | . | .     | .     | .         | .        | .                                   |                            |
| 0 .            | NA | . | .     | .     | .         | .        | .                                   |                            |
| 0 .            | NA | . | .     | .     | .         | .        | .                                   |                            |
| 0 .            | NA | . | .     | .     | .         | .        | .                                   |                            |
| 0 Carbamoyl    | NA | . | .     | CYT   | (LIGA     | KEGC.    | REACTOME_METABOLISM_OF_AMI          |                            |
| 0 .            | NA | . | .     | .     | .         | PID,BIO. | .                                   |                            |
| 0 .            | NA | . | .     | .     | .         | .        | .                                   |                            |
| 0 .            | NA | . | .     | .     | .         | .        | .                                   |                            |
| 0 {Buruli ulc  | NA | . | MUL   | INTR. | KEGC      | PID.     | REACTOME_LATENT_INFECTION_C         |                            |
| 0 Cholestasi   | NA | . | MAC.  | .     | .         | .        | .                                   |                            |
| 0 .            | NA | . | .     | .     | .         | .        | .                                   |                            |
| 0 .            | NA | . | .     | .     | .         | .        | .                                   |                            |
| 0 Spinal mus   | NA | . | PRO.  | UNF.  | .         | .        | .                                   |                            |
| 0 ?Muscular    | NA | . | ORG   | SAR   | (STRI     | KEGC     | PID.                                | REACTOME_STRIATED_MUSCLE_C |
| 0 .            | NA | . | MUS   | NUC.  | .         | .        | .                                   |                            |
| 0 .            | NA | . | SIGN  | INTR. | KEGC      | PID,BIO. | .                                   |                            |
| 0 {Coronary    | NA | . | ENZ   | VESI  | PRO       | KEGC     | PID,BIO REACTOME_SIGNALLING_BY_NGF; |                            |
| 0 .            | NA | . | .     | .     | .         | .        | .                                   |                            |
| 0 .            | NA | . | .     | .     | .         | .        | .                                   |                            |
| 0 .            | NA | . | REG   | INTR  | NEU       | KEGC.    | REACTOME_GASTRIN_CREB_SIGN          |                            |
| 0 Perlman sy   | NA | . | .     | .     | .         | .        | .                                   |                            |
| 0 Perlman sy   | NA | . | .     | .     | .         | .        | .                                   |                            |
| 0 .            | NA | . | .     | .     | KEGC.     | .        | .                                   |                            |
| 0 .            | NA | . | SIGN. | PHO   | KEGC      | PID.     | .                                   |                            |
| 0 .            | NA | . | .     | .     | .         | .        | .                                   |                            |
| 0 .            | NA | . | .     | .     | .         | .        | .                                   |                            |
| 0 .            | NA | . | .     | .     | .         | .        | .                                   |                            |
| 0 .            | NA | . | .     | .     | .         | .        | .                                   |                            |
| 0 Advanced     | NA | . | RHY.  | .     | KEGC      | PID.     | REACTOME_BMAL1_CLOCK_NPASZ          |                            |
| 0 .            | NA | . | .     | .     | .         | .        | .                                   |                            |

|   |                             |    |               |  |  |         |         |                             |     |
|---|-----------------------------|----|---------------|--|--|---------|---------|-----------------------------|-----|
| 0 | Mental retardation          | NA | EST/          |  |  |         |         |                             |     |
| 0 | Mental retardation          | NA | EST/          |  |  |         |         |                             |     |
| 0 |                             | NA |               |  |  |         |         |                             |     |
| 0 |                             | NA |               |  |  |         |         |                             |     |
| 0 |                             | NA |               |  |  |         |         |                             |     |
| 0 |                             | NA | SIGN INTR.    |  |  |         |         |                             |     |
| 0 |                             | NA | SYS           |  |  | PID     |         | REACTOME_DEVELOPMENTAL_BIC  |     |
| 0 |                             | NA |               |  |  |         |         |                             |     |
| 0 |                             | NA |               |  |  |         |         |                             |     |
| 0 |                             | NA |               |  |  |         |         |                             |     |
| 0 |                             | NA |               |  |  |         |         |                             |     |
| 0 | Atrioventricular conduction | NA |               |  |  |         |         |                             |     |
| 0 | Fanconi anemia              | NA |               |  |  | PID     | BIO     | REACTOME_REGULATION_OF_THE  |     |
| 0 |                             | NA |               |  |  |         |         | REACTOME_TRANSMISSION_ACRC  |     |
| 0 |                             | NA | EST/ORG       |  |  |         |         |                             |     |
| 0 |                             | NA |               |  |  |         |         |                             |     |
| 0 | Pontocerebellar hypoplasia  | NA |               |  |  |         |         |                             |     |
| 0 | LEOPARD syndrome            | NA | CELL ORG      |  |  | KEG(PID | BIO     | REACTOME_SIGNALLING_BY_NGF; |     |
| 0 |                             | NA |               |  |  | KEG(PID |         |                             |     |
| 0 |                             | NA |               |  |  |         |         |                             |     |
| 0 |                             | NA |               |  |  |         |         |                             |     |
| 0 |                             | NA |               |  |  |         |         | REACTOME_NEURONAL_SYSTEM;F  |     |
| 0 |                             | NA | RNA NUC       |  |  |         |         | REACTOME_GENERIC_TRANSCRIP  |     |
| 0 |                             | NA | NUC KINA      |  |  | BIO     |         |                             |     |
| 0 |                             | NA |               |  |  |         |         |                             |     |
| 0 |                             | NA |               |  |  |         |         | REACTOME_TRANSMEMBRANE_TF   |     |
| 0 | Colorectal adenocarcinoma   | NA | POS INTR TRAI |  |  | KEG(PID | BIO     | REACTOME_TGF_BETA_RECEPTOR  |     |
| 0 |                             | NA |               |  |  |         |         |                             |     |
| 0 |                             | NA | GLY(ORG TRAI  |  |  | KEG(    |         |                             |     |
| 0 |                             | NA | CELL          |  |  |         |         |                             |     |
| 0 |                             | NA |               |  |  |         |         |                             |     |
| 0 | Colorectal adenocarcinoma   | NA | DNA           |  |  | SING    | KEG(PID | REACTOME_MEIOSIS;REACTOME_I |     |
| 0 |                             | NA | EST/ORG       |  |  |         |         |                             |     |
| 0 | Esophageal adenocarcinoma   | NA | NEG CYT(      |  |  |         |         |                             |     |
| 0 |                             | NA |               |  |  | KEG(    |         |                             |     |
| 0 |                             | NA | EST/          |  |  |         |         |                             |     |
| 0 |                             | NA |               |  |  |         |         |                             |     |
| 0 |                             | NA | REG INTR      |  |  | KEG(    |         | REACTOME_SIGNALING_BY_GPCR  |     |
| 0 |                             | NA |               |  |  |         |         |                             |     |
| 0 |                             | NA |               |  |  | KEG(    |         |                             |     |
| 0 |                             | NA |               |  |  |         |         |                             |     |
| 0 | EBD inversion               | NA | SYS PRO       |  |  | PID     |         | REACTOME_EXTRACELLULAR_MAT  |     |
| 0 |                             | NA | NUC           |  |  |         |         |                             |     |
| 0 |                             | NA |               |  |  |         |         |                             |     |
| 0 |                             | NA |               |  |  |         |         |                             |     |
| 0 |                             | NA | CYT(CYS       |  |  |         |         |                             |     |
| 0 |                             | NA | CELL NUC      |  |  |         |         |                             |     |
| 0 |                             | NA |               |  |  |         |         |                             |     |
| 0 |                             | NA |               |  |  | KEG(    |         |                             |     |
| 0 |                             | NA |               |  |  |         |         |                             |     |
| 0 |                             | NA | MITC          |  |  | RNA     |         | PID                         |     |
| 0 |                             | NA | MITC          |  |  | RNA     |         | PID                         |     |
| 0 |                             | NA | COF           |  |  |         |         | KEG(PID                     | BIO |
| 0 |                             | NA |               |  |  |         |         | REACTOME_PPARA_ACTIVATES_G  |     |
| 0 |                             | NA |               |  |  | KEG(    |         |                             |     |

|    |              |    |                |              |       |       |                             |
|----|--------------|----|----------------|--------------|-------|-------|-----------------------------|
| 0. | NA           | .  | .              | .            | KEGC. | .     | .                           |
| 0. | NA           | .  | .              | .            | KEGC. | .     | .                           |
| 0. | NA           | .  | .              | .            | KEGC. | .     | .                           |
| 0. | NA           | .  | CHR.           | .            | .     | .     | .                           |
| 0. | NA           | .  | CHR.           | .            | .     | .     | .                           |
| 0  | Sinoatrial r | NA | .              | EST/MEN/CATI | KEGC. | .     | .                           |
| 0. | NA           | .  | .              | .            | .     | .     | .                           |
| 0. | NA           | .  | .              | .            | KEGC. | .     | REACTOME_TRANSMISSION_ACRC  |
| 0. | NA           | .  | .              | .            | KEGC. | .     | REACTOME_TRANSMISSION_ACRC  |
| 0  | Hypogonad    | NA | .              | .            | .     | PID.  | REACTOME_SIGNALING_BY_FGFR  |
| 0. | NA           | .  | SIG/NUC.       | .            | KEGC  | PID.  | REACTOME_REGULATION_OF_APC  |
| 0. | NA           | .  | .              | .            | .     | .     | .                           |
| 0. | NA           | .  | BIO/CYT/NUC.   | .            | .     | .     | .                           |
| 0. | NA           | .  | GLY/PRO.       | .            | .     | .     | .                           |
| 0. | NA           | .  | .              | .            | .     | .     | .                           |
| 0  | Tietz albini | NA | .              | .            | TRAI  | KEGC  | PID.                        |
| 0. | NA           | .  | .              | .            | .     | .     | .                           |
| 0. | NA           | .  | .              | .            | .     | PID.  | .                           |
| 0. | NA           | .  | .              | .            | .     | .     | .                           |
| 0. | NA           | .  | .              | .            | .     | .     | .                           |
| 0. | NA           | .  | GAM/NUC.       | .            | .     | .     | .                           |
| 0. | NA           | .  | .              | .            | .     | .     | .                           |
| 0. | NA           | .  | .              | .            | .     | .     | .                           |
| 0. | NA           | .  | .              | .            | .     | .     | .                           |
| 0. | NA           | .  | .              | .            | KEGC. | .     | .                           |
| 0. | NA           | .  | .              | .            | .     | .     | .                           |
| 0  | Urocanase    | NA | .              | .            | .     | KEGC. | REACTOME_METABOLISM_OF_AMI  |
| 0. | NA           | .  | MUL.           | REC          | KEGC. | .     | REACTOME_DEVELOPMENTAL_BIC  |
| 0. | NA           | .  | LIPI/INTRG_PI. | .            | .     | .     | .                           |
| 0. | NA           | .  | .              | .            | .     | .     | .                           |
| 0. | NA           | .  | .              | .            | .     | .     | .                           |
| 0. | NA           | .  | .              | .            | .     | .     | .                           |
| 0. | NA           | .  | .              | .            | KEGC. | .     | .                           |
| 0. | NA           | .  | .              | .            | .     | .     | .                           |
| 0. | NA           | .  | .              | .            | .     | .     | .                           |
| 0. | NA           | .  | .              | .            | RAS   | KEGC  | PID.                        |
| 0. | NA           | .  | .              | .            | TRAI  | KEGC  | PID.                        |
| 0  | Cutaneous    | NA | .              | DNA.         | PRO   | KEGC  | PID                         |
| 0. | NA           | .  | .              | .            | .     | .     | REACTOME_MEIOSIS;REACTOME_I |
| 0. | NA           | .  | .              | .            | .     | .     | REACTOME_EXTRACELLULAR_MAT  |
| 0. | NA           | .  | .              | .            | .     | .     | .                           |
| 0. | NA           | .  | MAC            | CYT/         | TRAI. | PID.  | .                           |
| 0  | Combined     | NA | .              | .            | .     | .     | .                           |
| 0. | NA           | .  | .              | .            | .     | .     | .                           |
| 0. | NA           | .  | .              | .            | .     | .     | .                           |
| 0. | NA           | .  | .              | .            | .     | .     | .                           |
| 0. | NA           | .  | RNA.           | TRAI.        | PID   | BIO   | REACTOME_TRANSCRIPTIONAL_A  |
| 0. | NA           | .  | .              | .            | .     | .     | .                           |
| 0. | NA           | .  | REG            | INTRC        | CATI  | KEGC. | REACTOME_NEURONAL_SYSTEM;F  |
| 0. | NA           | .  | .              | .            | CYS.  | .     | .                           |
| 0. | NA           | .  | .              | .            | .     | .     | .                           |

|   |             |    |   |        |           |       |       |      |                             |
|---|-------------|----|---|--------|-----------|-------|-------|------|-----------------------------|
| 0 | 3-Methylcr  | NA | . | .      | .         | .     | KEGC. | .    | REACTOME_METABOLISM_OF_AMI  |
| 0 | .           | NA | . | .      | .         | .     | .     | .    | .                           |
| 0 | .           | NA | . | .      | .         | .     | .     | .    | .                           |
| 0 | .           | NA | . | .      | .         | .     | .     | .    | .                           |
| 0 | .           | NA | . | .      | .         | .     | .     | .    | .                           |
| 0 | .           | NA | . | SYS    | ORGCATI.  | .     | .     | .    | .                           |
| 0 | .           | NA | . | CELI   | EXTIREC.  | .     | .     | .    | REACTOME_SIGNALING_BY_GPCR  |
| 0 | Leukemia,   | NA | . | .      | .         | .     | PID.  | .    | .                           |
| 0 | .           | NA | . | .      | .         | .     | .     | .    | .                           |
| 0 | .           | NA | . | .      | .         | .     | .     | .    | .                           |
| 0 | .           | NA | . | .      | .         | .     | .     | .    | .                           |
| 0 | .           | NA | . | .      | .         | .     | .     | .    | .                           |
| 0 | .           | NA | . | .      | .         | .     | .     | .    | .                           |
| 0 | .           | NA | . | .      | .         | .     | .     | .    | .                           |
| 0 | .           | NA | . | .      | .         | .     | .     | .    | .                           |
| 0 | .           | NA | . | .      | .         | .     | .     | .    | .                           |
| 0 | .           | NA | . | .      | .         | .     | .     | .    | .                           |
| 0 | .           | NA | . | .      | .         | .     | .     | .    | .                           |
| 0 | .           | NA | . | .      | .         | .     | .     | .    | .                           |
| 0 | .           | NA | . | VIRA.  | TRAI      | KEGC  | PID   | BIO. | .                           |
| 0 | .           | NA | . | .      | .         | .     | .     | .    | .                           |
| 0 | {?Bladder   | NA | . | .      | .         | .     | PID.  | .    | .                           |
| 0 | .           | NA | . | SIGN   | INTRCATI. | .     | .     | .    | .                           |
| 0 | .           | NA | . | ANA.   | .         | KEGC. | .     | .    | .                           |
| 0 | .           | NA | . | RNA.   | TRAI.     | PID.  | .     | .    | .                           |
| 0 | Fetal akine | NA | . | .      | .         | .     | .     | .    | .                           |
| 0 | .           | NA | . | .      | .         | .     | .     | .    | .                           |
| 0 | {Congestiv  | NA | . | REG    | INTRAMIN  | KEGC. | .     | .    | .                           |
| 0 | Deafness,   | NA | . | SYS    | INTR.     | .     | .     | .    | REACTOME_DIABETES_PATHWAYS  |
| 0 | .           | NA | . | .      | .         | KEGC. | BIO.  | .    | .                           |
| 0 | .           | NA | . | .      | .         | .     | .     | .    | .                           |
| 0 | .           | NA | . | .      | .         | .     | .     | .    | .                           |
| 0 | .           | NA | . | .      | .         | .     | .     | .    | .                           |
| 0 | .           | NA | . | .      | .         | .     | .     | .    | .                           |
| 0 | .           | NA | . | .      | .         | .     | .     | .    | .                           |
| 0 | .           | NA | . | .      | .         | .     | .     | .    | .                           |
| 0 | COACH sy    | NA | . | .      | .         | .     | .     | .    | .                           |
| 0 | .           | NA | . | .      | .         | .     | .     | .    | .                           |
| 0 | .           | NA | . | .      | .         | .     | .     | .    | .                           |
| 0 | .           | NA | . | .      | .         | .     | .     | .    | .                           |
| 0 | .           | NA | . | BIOF.  | ACIC      | KEGC. | .     | .    | REACTOME_NEGATIVE_REGULATC  |
| 0 | .           | NA | . | BIOF.  | ACIC      | KEGC. | .     | .    | REACTOME_NEGATIVE_REGULATC  |
| 0 | .           | NA | . | .      | .         | .     | .     | .    | .                           |
| 0 | .           | NA | . | SIGN   | CYT       | GTP   | KEGC. | .    | REACTOME_SIGNALING_BY_RHO_I |
| 0 | .           | NA | . | .      | .         | .     | .     | .    | .                           |
| 0 | .           | NA | . | SIGN   | INTR      | GAB   | KEGC. | .    | REACTOME_TRANSMISSION_ACRC  |
| 0 | .           | NA | . | .      | .         | .     | .     | .    | .                           |
| 0 | .           | NA | . | .      | .         | .     | .     | .    | .                           |
| 0 | .           | NA | . | .      | .         | .     | .     | .    | .                           |
| 0 | .           | NA | . | .      | .         | .     | .     | .    | .                           |
| 0 | .           | NA | . | .      | .         | .     | PID.  | .    | REACTOME_DIABETES_PATHWAYS  |
| 0 | .           | NA | . | .      | .         | .     | .     | .    | .                           |
| 0 | .           | NA | . | RES    | INTR      | PEP.  | .     | .    | .                           |
| 0 | .           | NA | . | LIPII. | .         | KEGC. | .     | .    | REACTOME_BIOLOGICAL_OXIDATI |
| 0 | .           | NA | . | .      | .         | .     | .     | .    | .                           |
| 0 | Renal tubu  | NA | . | .      | INTR      | CATI  | KEGC. | .    | REACTOME_TRANSMEMBRANE_TR   |
| 0 | .           | NA | . | .      | .         | .     | .     | .    | REACTOME_EXTRACELLULAR_MAT  |

|                |    |   |                          |              |             |                             |                             |   |
|----------------|----|---|--------------------------|--------------|-------------|-----------------------------|-----------------------------|---|
| 0.             | NA | . | .                        | EXTI.        | .           | .                           | .                           | . |
| 0.             | NA | . | .                        | .            | .           | .                           | .                           | . |
| 0.             | NA | . | BIOF.                    | PHO.         | .           | .                           | .                           | . |
| 0.             | NA | . | .                        | .            | .           | .                           | .                           | . |
| 0.             | NA | . | PAT ADH ACTI.            | .            | .           | .                           | .                           | . |
| 0 Fraser syn   | NA | . | .                        | .            | .           | .                           | .                           | . |
| 0.             | NA | . | .                        | .            | .           | .                           | REACTOME_G0_AND_EARLY_G1;R  | . |
| 0.             | NA | . | .                        | .            | .           | .                           | REACTOME_SIGNALING_BY_RHO_G | . |
| 0.             | NA | . | RNA CYT(TRA KEG(PID.BIO. | .            | .           | .                           | .                           | . |
| 0 Myelodysp    | NA | . | .                        | .            | .           | .                           | .                           | . |
| 0.             | NA | . | .                        | .            | .           | .                           | .                           | . |
| 0.             | NA | . | CELI INTR MET            | KEGC.        | .           | .                           | .                           | . |
| 0.             | NA | . | .                        | .            | .           | .                           | .                           | . |
| 0.             | NA | . | .                        | .            | KEGC.       | .                           | REACTOME_HS_GAG_BIOSYNTHES  | . |
| 0.             | NA | . | .                        | .            | .           | .                           | .                           | . |
| 0.             | NA | . | .                        | .            | .           | .                           | .                           | . |
| 0.             | NA | . | .                        | .            | .           | .                           | .                           | . |
| 0.             | NA | . | .                        | .            | .           | .                           | .                           | . |
| 0.             | NA | . | .                        | .            | .           | .                           | .                           | . |
| 0.             | NA | . | .                        | .            | .           | .                           | .                           | . |
| 0.             | NA | . | .                        | .            | .           | .                           | .                           | . |
| 0.             | NA | . | .                        | .            | .           | .                           | .                           | . |
| 0.             | NA | . | .                        | .            | .           | .                           | .                           | . |
| 0.             | NA | . | .                        | .            | .           | .                           | .                           | . |
| 0.             | NA | . | POS INTR.                | KEGC.        | BIO.        | .                           | .                           | . |
| 0 [Blood gro   | NA | . | INTR.                    | .            | .           | .                           | .                           | . |
| 0.             | NA | . | CYT(.                    | .            | .           | .                           | .                           | . |
| 0.             | NA | . | EST/NON.                 | .            | .           | .                           | .                           | . |
| 0.             | NA | . | .                        | .            | KEGC.       | .                           | REACTOME_O_LINKED_GLYCOSYL  | . |
| 0.             | NA | . | .                        | .            | .           | .                           | .                           | . |
| 0.             | NA | . | NON MOL.                 | .            | .           | .                           | .                           | . |
| 0.             | NA | . | .                        | .            | .           | .                           | .                           | . |
| 0.             | NA | . | .                        | CAT KEG(PID. | .           | .                           | REACTOME_TRANSMEMBRANE_TF   | . |
| 0.             | NA | . | .                        | .            | .           | .                           | REACTOME_CELL_CYCLE;REACTO  | . |
| 0.             | NA | . | .                        | .            | .           | .                           | .                           | . |
| 0.             | NA | . | INTR CATI.               | .            | .           | .                           | REACTOME_TRANSMEMBRANE_TF   | . |
| 0.             | NA | . | SYS.                     | .            | .           | .                           | .                           | . |
| 0.             | NA | . | .                        | .            | .           | .                           | .                           | . |
| 0.             | NA | . | .                        | .            | KEGC.       | .                           | .                           | . |
| 0.             | NA | . | ORG NUC.                 | KEGC.        | .           | .                           | .                           | . |
| 0 Mental retz  | NA | . | SIG CYT(.                | .            | .           | .                           | .                           | . |
| 0 Ciliary dysl | NA | . | .                        | .            | .           | .                           | .                           | . |
| 0.             | NA | . | ENZ'.                    | PHO.         | PID.BIO     | REACTOME_SIGNALING_BY_RHO_G | .                           | . |
| 0.             | NA | . | ENZ'.                    | PHO.         | PID.BIO     | REACTOME_SIGNALING_BY_RHO_G | .                           | . |
| 0.             | NA | . | .                        | .            | .           | .                           | .                           | . |
| 0.             | NA | . | .                        | .            | .           | .                           | .                           | . |
| 0.             | NA | . | .                        | .            | .           | .                           | .                           | . |
| 0.             | NA | . | .                        | .            | .           | .                           | .                           | . |
| 0.             | NA | . | .                        | .            | .           | .                           | .                           | . |
| 0.             | NA | . | .                        | .            | .           | .                           | .                           | . |
| 0.             | NA | . | BIOF.                    | .            | KEG(PID.BIO | REACTOME_ACTIVATED_AMPK_ST  | .                           | . |

|   |             |    |   |   |               |              |   |                             |
|---|-------------|----|---|---|---------------|--------------|---|-----------------------------|
| 0 | Succinyl C  | NA | . | . | CYT(TRA       | KEGC.        | . | REACTOME_METABOLISM_OF_LIPI |
| 0 | .           | NA | . | . | CYT(TRA       | KEGC(PID.    | . | REACTOME_PPARA_ACTIVATES_G  |
| 0 | .           | NA | . | . | .             | .            | . | .                           |
| 0 | .           | NA | . | . | .             | .            | . | .                           |
| 0 | .           | NA | . | . | .             | .            | . | .                           |
| 0 | .           | NA | . | . | .             | .            | . | .                           |
| 0 | Acrodysosi  | NA | . | . | INSC HYD      | KEGC.        | . | REACTOME_SIGNALING_BY_GPCR  |
| 0 | .           | NA | . | . | .             | .            | . | .                           |
| 0 | .           | NA | . | . | .             | .            | . | REACTOME_CELL_CYCLE;REACTO  |
| 0 | .           | NA | . | . | ENZ' PRO INTE | KEGC.        | . | .                           |
| 0 | .           | NA | . | . | .             | .            | . | .                           |
| 0 | .           | NA | . | . | .             | .            | . | .                           |
| 0 | .           | NA | . | . | .             | .            | . | .                           |
| 0 | Agammagl    | NA | . | . | ENZ' CYT(HOR  | KEGC(PID.BIO | . | REACTOME_SIGNALLING_BY_NGF; |
| 0 | .           | NA | . | . | DNA NUC.      | PID.BIO      | . | REACTOME_CELL_CYCLE;REACTO  |
| 0 | .           | NA | . | . | .             | .            | . | .                           |
| 0 | .           | NA | . | . | ORG.          | PID.         | . | .                           |
| 0 | .           | NA | . | . | .             | .            | . | .                           |
| 0 | .           | NA | . | . | G_PI INTR.    | .            | . | .                           |
| 0 | .           | NA | . | . | COF CYT(THIC  | KEGC.        | . | .                           |
| 0 | .           | NA | . | . | .             | .            | . | .                           |
| 0 | Wagner sy   | NA | . | . | MUL PRO CAR   | KEGC(PID.    | . | REACTOME_CS_DS_DEGRADATIO   |
| 0 | .           | NA | . | . | .             | .            | . | .                           |
| 0 | Febrile sei | NA | . | . | REG CELICATI. | .            | . | .                           |
| 0 | .           | NA | . | . | .             | .            | . | .                           |
| 0 | .           | NA | . | . | ARYI.         | .            | . | REACTOME_PTM_GAMMA_CARBO)   |
| 0 | .           | NA | . | . | .             | .            | . | .                           |
| 0 | .           | NA | . | . | BIOFORG CHR.  | .            | . | .                           |
| 0 | .           | NA | . | . | BIOFORG CHR.  | .            | . | .                           |
| 0 | .           | NA | . | . | .             | .            | . | .                           |
| 0 | .           | NA | . | . | .             | .            | . | .                           |
| 0 | .           | NA | . | . | .             | KEGC.        | . | REACTOME_DEVELOPMENTAL_BIC  |
| 0 | .           | NA | . | . | CELCYT(ENZ'.  | .            | . | .                           |
| 0 | .           | NA | . | . | .             | .            | . | .                           |
| 0 | .           | NA | . | . | RNA.          | TRAI.        | . | .                           |
| 0 | .           | NA | . | . | .             | .            | . | .                           |
| 0 | .           | NA | . | . | .             | .            | . | .                           |
| 0 | .           | NA | . | . | .             | KEGC.        | . | .                           |
| 0 | .           | NA | . | . | REG.          | KEGC(PID.BIO | . | REACTOME_CELL_CYCLE;REACTO  |
| 0 | .           | NA | . | . | REG.          | KEGC(PID.BIO | . | REACTOME_CELL_CYCLE;REACTO  |
| 0 | .           | NA | . | . | NUC NUC TRAI  | KEGC(PID.BIO | . | REACTOME_INTERFERON_ALPHA_  |
| 0 | .           | NA | . | . | NUC NUC TRAI  | KEGC(PID.BIO | . | REACTOME_INTERFERON_ALPHA_  |
| 0 | .           | NA | . | . | .             | .            | . | .                           |
| 0 | .           | NA | . | . | SYS' INTR.    | .            | . | .                           |
| 0 | .           | NA | . | . | .             | .            | . | .                           |
| 0 | .           | NA | . | . | SYS' INTR.    | .            | . | .                           |
| 0 | .           | NA | . | . | SYS' INTR.    | .            | . | .                           |
| 0 | .           | NA | . | . | .             | .            | . | .                           |
| 0 | .           | NA | . | . | .             | .            | . | .                           |
| 0 | .           | NA | . | . | .             | .            | . | .                           |
| 0 | .           | NA | . | . | .             | .            | . | .                           |
| 0 | .           | NA | . | . | .             | .            | . | .                           |
| 0 | .           | NA | . | . | .             | .            | . | .                           |
| 0 | .           | NA | . | . | .             | .            | . | .                           |
| 0 | .           | NA | . | . | .             | .            | . | .                           |
| 0 | .           | NA | . | . | .             | .            | . | .                           |
| 0 | .           | NA | . | . | .             | .            | . | .                           |
| 0 | .           | NA | . | . | CYT(.         | .            | . | .                           |

|               |    |   |       |       |         |         |                             |   |   |
|---------------|----|---|-------|-------|---------|---------|-----------------------------|---|---|
| 0 .           | NA | . | .     | .     | .       | .       | .                           | . | . |
| 0 .           | NA | . | BIOF. | PHO   | KEG(PID | BIO     | REACTOME_SIGNALING_BY_WNT;F |   |   |
| 0 Retinitis p | NA | . | SEN.  | .     | KEG(PID | .       | REACTOME_CGMP_EFFECTS;REAC  |   |   |
| 0 .           | NA | . | .     | CELI  | ACTI.   | .       | .                           | . | . |
| 0 .           | NA | . | SIGN  | NUC   | HYD.    | .       | .                           | . | . |
| 0 .           | NA | . | CELI  | CYT(  | KEG(PID | .       | .                           | . | . |
| 0 .           | NA | . | .     | .     | .       | .       | .                           | . | . |
| 0 .           | NA | . | .     | .     | .       | .       | .                           | . | . |
| 0 [Memory, ε  | NA | . | .     | .     | .       | .       | REACTOME_SIGNALING_BY_HIPPC |   |   |
| 0 .           | NA | . | RNA   | CYT(  | KEG(    | .       | REACTOME_CYTOSOLIC_TRNA_AM  |   |   |
| 0 .           | NA | . | SYS   | EXTI. | KEG(    | .       | REACTOME_DEVELOPMENTAL_BIC  |   |   |
| 0 Frank-ter F | NA | . | .     | .     | .       | .       | .                           | . | . |
| 0 .           | NA | . | .     | .     | .       | .       | .                           | . | . |
| 0 .           | NA | . | .     | .     | .       | .       | .                           | . | . |
| 0 .           | NA | . | .     | .     | .       | .       | .                           | . | . |
| 0 {Cancer pr  | NA | . | ENZ   | INTR  | TRAI    | KEG(PID | REACTOME_NEGATIVE_REGULATI( |   |   |
| 0 {Cancer pr  | NA | . | ENZ   | INTR  | TRAI    | KEG(PID | REACTOME_NEGATIVE_REGULATI( |   |   |
| 0 {Cancer pr  | NA | . | ENZ   | INTR  | TRAI    | KEG(PID | REACTOME_NEGATIVE_REGULATI( |   |   |
| 0 .           | NA | . | .     | .     | .       | .       | .                           | . | . |
| 0 .           | NA | . | .     | .     | .       | .       | REACTOME_TRANSLATION;REACTI |   |   |
| 0 Night blind | NA | . | GLU   | INTR  | GLU     | KEG(    | REACTOME_SIGNALING_BY_GPCR  |   |   |
| 0 .           | NA | . | .     | .     | .       | .       | .                           | . | . |
| 0 .           | NA | . | GLY(  | .     | TRAI    | KEG(    | REACTOME_METABOLISM_OF_PRC  |   |   |
| 0 .           | NA | . | ENE.  | .     | KEG(    | .       | REACTOME_METABOLISM_OF_PRC  |   |   |
| 0 .           | NA | . | .     | ORG   | HYD.    | .       | .                           | . | . |
| 0 .           | NA | . | .     | ORG   | HYD.    | .       | .                           | . | . |
| 0 .           | NA | . | .     | .     | .       | .       | .                           | . | . |
| 0 .           | NA | . | .     | .     | .       | .       | .                           | . | . |
| 0 .           | NA | . | .     | .     | .       | .       | .                           | . | . |
| 0 .           | NA | . | .     | .     | .       | .       | .                           | . | . |
| 0 Adult i phe | NA | . | BIO   | CELI  | TRAI    | KEG(    | .                           | . | . |
| 0 .           | NA | . | .     | NUC   | DNA.    | .       | .                           | . | . |
| 0 Hermansk    | NA | . | ORG   | AXO   | IDEN.   | .       | REACTOME_MEMBRANE_TRAFFIC(  |   |   |
| 0 .           | NA | . | .     | .     | .       | .       | .                           | . | . |
| 0 .           | NA | . | .     | .     | .       | .       | .                           | . | . |
| 0 .           | NA | . | .     | .     | .       | .       | .                           | . | . |
| 0 .           | NA | . | .     | .     | .       | .       | .                           | . | . |
| 0 .           | NA | . | .     | .     | .       | .       | .                           | . | . |
| 0 .           | NA | . | .     | .     | .       | .       | REACTOME_GENERIC_TRANSCRIP  |   |   |
| 0 .           | NA | . | .     | .     | .       | .       | .                           | . | . |
| 0 Diabetes n  | NA | . | .     | .     | .       | .       | .                           | . | . |
| 0 Hemochroi   | NA | . | .     | .     | .       | .       | .                           | . | . |
| 0 .           | NA | . | .     | .     | .       | .       | .                           | . | . |
| 0 .           | NA | . | .     | NUC.  | .       | PID.    | REACTOME_HOMOLOGOUS_RECO    |   |   |
| 0 .           | NA | . | .     | .     | .       | .       | .                           | . | . |
| 0 .           | NA | . | .     | .     | .       | .       | .                           | . | . |
| 0 .           | NA | . | .     | .     | .       | .       | .                           | . | . |
| 0 .           | NA | . | .     | .     | LIGA    | KEG(    | REACTOME_CYTOSOLIC_TRNA_AM  |   |   |
| 0 .           | NA | . | .     | CYT(  | KEG(PID | BIO.    | .                           | . | . |
| 0 Deafness,   | NA | . | .     | .     | KEG(PID | .       | REACTOME_EXTRACELLULAR_MAT  |   |   |
| 0 Deafness,   | NA | . | .     | .     | KEG(PID | .       | REACTOME_EXTRACELLULAR_MAT  |   |   |
| 0 {Diabetes,  | NA | . | SIGN  | BRU   | CATI    | KEG(    | REACTOME_SIGNALLING_BY_NGF; |   |   |

|                |    |   |        |           |           |         |                             |                             |   |
|----------------|----|---|--------|-----------|-----------|---------|-----------------------------|-----------------------------|---|
| 0 .            | NA | . | .      | .         | .         | .       | .                           | .                           | . |
| 0 .            | NA | . | REG .  | LIGA      | KEG(PID   | BIO     | REACTOME_GENERIC_TRANSCRIP  |                             |   |
| 0 .            | NA | . | REG .  | LIGA      | KEG(PID   | BIO     | REACTOME_GENERIC_TRANSCRIP  |                             |   |
| 0 .            | NA | . | REG .  | LIGA      | KEG(PID   | BIO     | REACTOME_GENERIC_TRANSCRIP  |                             |   |
| 0 .            | NA | . | ANA .  | .         | KEG(      | .       | REACTOME_TRANSLATION;REACTI |                             |   |
| 0 Spermatog    | NA | . | .      | .         | .         | .       | .                           | .                           | . |
| 0 .            | NA | . | .      | .         | .         | .       | .                           | .                           | . |
| 0 .            | NA | . | .      | .         | .         | KEG(    | .                           | .                           | . |
| 0 .            | NA | . | .      | .         | .         | .       | .                           | .                           | . |
| 0 .            | NA | . | RNA    | CYT(      | TRAI      | .       | .                           | .                           | . |
| 0 .            | NA | . | ENZ' . | .         | .         | PID .   | REACTOME_SIGNALING_BY_FGFR  |                             |   |
| 0 Retinitis pi | NA | . | REG .  | ENZ' KEG( | PID .     | .       | .                           | .                           | . |
| 0 .            | NA | . | RNA    | NUC       | TRAI      | .       | .                           | .                           | . |
| 0 Choriodal c  | NA | . | SEN    | INTR .    | KEG(      | .       | .                           | .                           | . |
| 0 .            | NA | . | SIG    | INTR      | TRAI      | .       | .                           | .                           | . |
| 0 .            | NA | . | SIG    | INTR      | TRAI      | .       | .                           | .                           | . |
| 0 .            | NA | . | .      | .         | .         | PID .   | .                           | .                           | . |
| 0 .            | NA | . | .      | MEV .     | .         | .       | .                           | .                           | . |
| 0 .            | NA | . | .      | .         | .         | .       | REACTOME_MICRORNA_MIRNA_BI  |                             |   |
| 0 .            | NA | . | .      | .         | .         | .       | .                           | .                           | . |
| 0 .            | NA | . | .      | .         | .         | .       | .                           | .                           | . |
| 0 Neuropath    | NA | . | ORG    | PRO       | INTE .    | PID .   | .                           | .                           | . |
| 0 .            | NA | . | .      | .         | .         | .       | .                           | .                           | . |
| 0 .            | NA | . | SYS' . | .         | .         | .       | REACTOME_EXTRACELLULAR_MA   |                             |   |
| 0 .            | NA | . | .      | .         | .         | KEG(    | .                           | .                           | . |
| 0 Hydatidifor  | NA | . | .      | .         | .         | .       | .                           | .                           | . |
| 0 .            | NA | . | .      | .         | .         | .       | .                           | .                           | . |
| 0 .            | NA | . | .      | .         | .         | .       | .                           | .                           | . |
| 0 Maple syru   | NA | . | CM0    | CAR       | ORGLYA    | KEG(    | REACTOME_METABOLISM_OF_AMI  |                             |   |
| 0 .            | NA | . | SEN    | CYT(      | ELEC      | .       | .                           | .                           | . |
| 0 Congenital   | NA | . | EST    | INTR      | SUB       | .       | REACTOME_TRANSMEMBRANE_TR   |                             |   |
| 0 .            | NA | . | .      | .         | .         | .       | .                           | .                           | . |
| 0 .            | NA | . | .      | .         | .         | .       | .                           | .                           | . |
| 0 .            | NA | . | POS .  | IDEN .    | .         | .       | .                           | .                           | . |
| 0 .            | NA | . | .      | .         | .         | .       | .                           | .                           | . |
| 0 .            | NA | . | SYS' . | LIGA .    | .         | .       | REACTOME_GENERIC_TRANSCRIP  |                             |   |
| 0 .            | NA | . | RES    | NUC .     | KEG(PID . | .       | .                           | .                           | . |
| 0 .            | NA | . | .      | .         | .         | .       | .                           | .                           | . |
| 0 .            | NA | . | .      | CYT(      | PRO .     | .       | .                           | .                           | . |
| 0 .            | NA | . | DNA .  | NUC .     | .         | .       | REACTOME_DNA_REPAIR         |                             |   |
| 0 .            | NA | . | .      | .         | .         | .       | .                           | .                           | . |
| 0 .            | NA | . | .      | .         | .         | .       | .                           | .                           | . |
| 0 .            | NA | . | .      | .         | .         | KEG(    | .                           | .                           | . |
| 0 Muscular d   | NA | . | MUS    | PRO       | STRI      | KEG(PID | BIO                         | REACTOME_INTEGRIN_CELL_SURF |   |
| 0 Muscular d   | NA | . | MUS    | PRO       | STRI      | KEG(PID | BIO                         | REACTOME_INTEGRIN_CELL_SURF |   |
| 0 Cardiomyo    | NA | . | ANA .  | .         | .         | .       | .                           | .                           | . |
| 0 .            | NA | . | ISOF . | OXIL .    | .         | .       | .                           | .                           | . |
| 0 .            | NA | . | .      | .         | .         | KEG(    | .                           | .                           | . |
| 0 .            | NA | . | .      | .         | .         | .       | .                           | .                           | . |
| 0 .            | NA | . | .      | .         | .         | .       | .                           | .                           | . |
| 0 .            | NA | . | .      | INTRG     | PI .      | .       | .                           | .                           | . |
| 0 Hemophag     | NA | . | MEM .  | .         | KEG(      | .       | REACTOME_BOTULINUM_NEUROT   |                             |   |
| 0 .            | NA | . | .      | .         | .         | .       | .                           | .                           | . |
| 0 .            | NA | . | BIO    | INTR      | SULI      | KEG(    | REACTOME_CHONDROITIN_SULFA  |                             |   |



|                |    |   |                    |             |                             |                             |   |
|----------------|----|---|--------------------|-------------|-----------------------------|-----------------------------|---|
| 0 .            | NA | . | .                  | .           | .                           | .                           | . |
| 0 .            | NA | . | INTE ORG HYD .     | PID .       | .                           | .                           | . |
| 0 .            | NA | . | .                  | .           | .                           | .                           | . |
| 0 .            | NA | . | SIGN CYTOKINA .    | .           | .                           | .                           | . |
| 0 Emery-Dre    | NA | . | ORG SYN, ACTI .    | .           | .                           | REACTOME_MEIOSIS; REACTOME_ |   |
| 0 Emery-Dre    | NA | . | ORG SYN, ACTI .    | .           | .                           | REACTOME_MEIOSIS; REACTOME_ |   |
| 0 Emery-Dre    | NA | . | ORG SYN, ACTI .    | .           | .                           | REACTOME_MEIOSIS; REACTOME_ |   |
| 0 .            | NA | . | RES .              | OXIL .      | PID .                       | .                           | . |
| 0 .            | NA | . | .                  | .           | .                           | .                           | . |
| 0 Mental retz  | NA | . | NUC DNA .          | .           | .                           | .                           | . |
| 0 .            | NA | . | .                  | .           | .                           | .                           | . |
| 0 {Microvasc   | NA | . | RNA CYTOKIN KEGC   | PID, BIO .  | .                           | .                           | . |
| 0 .            | NA | . | .                  | .           | .                           | .                           | . |
| 0 .            | NA | . | .                  | .           | .                           | .                           | . |
| 0 [LPA defici  | NA | . | SYS .              | PRO .       | PID .                       | REACTOME_METABOLISM_OF_LIPI |   |
| 0 .            | NA | . | REG .              | PHO KEGC    | PID, BIO .                  | .                           | . |
| 0 Adenocarc    | NA | . | BIOF CYTOKIN KEGC  | PID, BIO    | REACTOME_IMMUNE_SYSTEM; REA |                             |   |
| 0 .            | NA | . | .                  | .           | .                           | .                           | . |
| 0 .            | NA | . | .                  | .           | .                           | .                           | . |
| 0 .            | NA | . | CYT .              | .           | .                           | .                           | . |
| 0 .            | NA | . | .                  | .           | .                           | .                           | . |
| 0 Raine sync   | NA | . | .                  | .           | .                           | .                           | . |
| 0 .            | NA | . | .                  | .           | .                           | .                           | . |
| 0 .            | NA | . | .                  | .           | .                           | .                           | . |
| 0 .            | NA | . | RNA NUC .          | .           | .                           | .                           | . |
| 0 .            | NA | . | RNA NUC .          | .           | .                           | .                           | . |
| 0 .            | NA | . | RNA NUC .          | .           | .                           | .                           | . |
| 0 .            | NA | . | .                  | .           | .                           | .                           | . |
| 0 .            | NA | . | RES .              | HYD .       | .                           | .                           | . |
| 0 .            | NA | . | SULI .             | SULI KEGC . | .                           | REACTOME_CHONDROITIN_SULFA  |   |
| 0 Immunode     | NA | . | REG MEM PRO KEGC   | PID .       | .                           | REACTOME_DOWNSTREAM_SIGNA   |   |
| 0 .            | NA | . | .                  | .           | .                           | .                           | . |
| 0 .            | NA | . | .                  | .           | .                           | .                           | . |
| 0 Spastic pai  | NA | . | .                  | .           | .                           | .                           | . |
| 0 .            | NA | . | .                  | .           | .                           | .                           | . |
| 0 .            | NA | . | EST/ MEM/ LIPI .   | PID, BIO .  | .                           | .                           | . |
| 0 .            | NA | . | .                  | .           | PID .                       | REACTOME_GASTRIN_CREB_SIGN  |   |
| 0 .            | NA | . | .                  | .           | .                           | .                           | . |
| 0 .            | NA | . | .                  | .           | .                           | .                           | . |
| 0 .            | NA | . | .                  | .           | .                           | .                           | . |
| 0 .            | NA | . | .                  | .           | .                           | .                           | . |
| 0 .            | NA | . | .                  | .           | .                           | REACTOME_EXTRACELLULAR_MAT  |   |
| 0 .            | NA | . | .                  | .           | .                           | .                           | . |
| 0 .            | NA | . | .                  | .           | .                           | .                           | . |
| 0 .            | NA | . | .                  | .           | KEGC .                      | REACTOME_ABC_FAMILY_PROTEIN |   |
| 0 Ciliary dyst | NA | . | .                  | .           | .                           | .                           | . |
| 0 .            | NA | . | .                  | .           | .                           | .                           | . |
| 0 .            | NA | . | .                  | .           | .                           | .                           | . |
| 0 .            | NA | . | .                  | .           | KEGC .                      | REACTOME_METABOLISM_OF_AMI  |   |
| 0 .            | NA | . | PRO CYTOKIN KEGC . | .           | .                           | REACTOME_TRIF_MEDIATED_TLR3 |   |
| 0 .            | NA | . | .                  | .           | .                           | .                           | . |

|    |            |    |                 |              |           |                             |                             |
|----|------------|----|-----------------|--------------|-----------|-----------------------------|-----------------------------|
| 0. | NA         | .  | .               | .            | .         | .                           | .                           |
| 0. | NA         | .  | PRO CYT(CATI.   | .            | .         | REACTOME_ASSOCIATION_OF_TRI | .                           |
| 0  | Bardet-Bie | NA | .               | .            | .         | .                           | .                           |
| 0. | NA         | .  | .               | .            | .         | .                           | .                           |
| 0. | NA         | .  | .               | .            | .         | .                           | .                           |
| 0. | NA         | .  | .               | .            | .         | .                           | .                           |
| 0. | NA         | .  | .               | .            | .         | .                           | .                           |
| 0. | NA         | .  | .               | .            | .         | .                           | .                           |
| 0. | NA         | .  | .               | .            | .         | .                           | .                           |
| 0. | NA         | .  | .               | .            | KEGC.     | BIO.                        | .                           |
| 0. | NA         | .  | POS.            | .            | .         | .                           | .                           |
| 0  | Alpha-keto | NA | .               | GEN ORG OXIL | KEGC.     | BIO                         | REACTOME_PYRUVATE_METABOL   |
| 0. | NA         | .  | .               | .            | KEGC(PID  | BIO                         | REACTOME_SIGNALING_BY_NGF;  |
| 0. | NA         | .  | MUS NUC ENZ'    | KEGC(PID     | BIO       | REACTOME_DIABETES_PATHWAYS  | .                           |
| 0. | NA         | .  | .               | .            | .         | .                           | .                           |
| 0. | NA         | .  | .               | .            | .         | .                           | .                           |
| 0. | NA         | .  | .               | .            | .         | .                           | .                           |
| 0. | NA         | .  | .               | .            | .         | .                           | .                           |
| 0. | NA         | .  | .               | .            | .         | .                           | .                           |
| 0. | NA         | .  | .               | .            | .         | .                           | .                           |
| 0. | NA         | .  | .               | .            | .         | .                           | .                           |
| 0. | NA         | .  | .               | .            | .         | .                           | .                           |
| 0. | NA         | .  | .               | .            | .         | .                           | .                           |
| 0. | NA         | .  | .               | .            | .         | .                           | .                           |
| 0. | NA         | .  | .               | .            | .         | .                           | .                           |
| 0. | NA         | .  | .               | .            | .         | .                           | .                           |
| 0. | NA         | .  | .               | .            | .         | .                           | .                           |
| 0. | NA         | .  | .               | .            | .         | .                           | .                           |
| 0. | NA         | .  | .               | .            | .         | .                           | .                           |
| 0. | NA         | .  | .               | .            | .         | .                           | .                           |
| 0. | NA         | .  | .               | .            | .         | .                           | .                           |
| 0. | NA         | .  | .               | .            | .         | .                           | .                           |
| 0. | NA         | .  | .               | .            | .         | .                           | .                           |
| 0. | NA         | .  | .               | .            | .         | .                           | .                           |
| 0. | NA         | .  | .               | .            | .         | .                           | .                           |
| 0. | NA         | .  | .               | .            | .         | .                           | .                           |
| 0. | NA         | .  | .               | .            | KEGC.     | .                           | REACTOME_O_LINKED_GLYCOSYL  |
| 0. | NA         | .  | .               | .            | .         | .                           | .                           |
| 0. | NA         | .  | .               | .            | .         | .                           | .                           |
| 0. | NA         | .  | PRO.            | DRU.         | .         | .                           | REACTOME_MEIOSIS;REACTOME_I |
| 0. | NA         | .  | SYS' INTR REC   | KEGC(PID.    | .         | .                           | REACTOME_SIGNALING_BY_GPCR  |
| 0. | NA         | .  | .               | .            | .         | .                           | .                           |
| 0. | NA         | .  | .               | .            | .         | .                           | .                           |
| 0. | NA         | .  | POS MEM PRO.    | PID.         | .         | .                           | .                           |
| 0. | NA         | .  | .               | .            | KEGC.     | .                           | .                           |
| 0  | Chronic gr | NA | .               | DEFI CYT(HYD | KEGC(PID. | .                           | .                           |
| 0. | NA         | .  | .               | .            | .         | .                           | .                           |
| 0. | NA         | .  | .               | .            | .         | .                           | .                           |
| 0. | NA         | .  | .               | .            | KEGC.     | .                           | REACTOME_ACTIVATED_NOTCH1_  |
| 0. | NA         | .  | EST/ MEM CATI   | KEGC.        | .         | .                           | .                           |
| 0. | NA         | .  | .               | .            | .         | .                           | .                           |
| 0. | NA         | .  | ORG SYN, LIPIE. | .            | .         | .                           | .                           |
| 0. | NA         | .  | .               | CYT(.        | .         | .                           | .                           |
| 0. | NA         | .  | .               | .            | .         | .                           | .                           |
| 0  | Ehlers-Dar | NA | .               | SYS' PRO.    | KEGC(PID. | .                           | REACTOME_DEVELOPMENTAL_BIC  |
| 0  | Dystonia-1 | NA | .               | MUS PRO.     | .         | .                           | .                           |
| 0. | NA         | .  | .               | .            | .         | .                           | REACTOME_IMMUNE_SYSTEM;REA  |
| 0. | NA         | .  | PRO INTR PHO.   | .            | .         | .                           | .                           |

|                |    |   |                           |                                    |
|----------------|----|---|---------------------------|------------------------------------|
| 0 .            | NA | . | SIGNUC TRAI.              | PID.BIO .                          |
| 0 .            | NA | . | SIGNUC TRAI.              | PID.BIO .                          |
| 0 .            | NA | . | .                         | .                                  |
| 0 .            | NA | . | .                         | .                                  |
| 0 .            | NA | . | MUL .                     | REACTOME_EXTRACELLULAR_MA          |
| 0 .            | NA | . | NUC STRI.                 | .                                  |
| 0 .            | NA | . | .                         | REACTOME_O_LINKED_GLYCOSYL         |
| 0 .            | NA | . | .                         | .                                  |
| 0 .            | NA | . | RNA . RNA .               | REACTOME_SIGNALING_BY_FGFR         |
| 0 .            | NA | . | .                         | .                                  |
| 0 .            | NA | . | KEGC .                    | .                                  |
| 0 .            | NA | . | CYT( .                    | BIO REACTOME_SIGNALING_BY_WNT;F    |
| 0 .            | NA | . | DNA NUC NUC KEGC .        | BIO REACTOME_ACTIVATION_OF_THE     |
| 0 .            | NA | . | .                         | .                                  |
| 0 .            | NA | . | MUS .                     | .                                  |
| 0 .            | NA | . | CYT( .                    | .                                  |
| 0 Hyperlysin   | NA | . | PRO CYT( .                | KEGC . REACTOME_METABOLISM_OF_AMI  |
| 0 .            | NA | . | .                         | .                                  |
| 0 .            | NA | . | SIGNINTR .                | KEGC . BIO .                       |
| 0 .            | NA | . | .                         | .                                  |
| 0 Myopathy,    | NA | . | KEGC .                    | REACTOME_CELL_CELL_COMMUNI         |
| 0 Basal cell c | NA | . | INTRREC KEGC(PID.BIO      | REACTOME_SIGNALING_BY_GPCR         |
| 0 .            | NA | . | .                         | .                                  |
| 0 .            | NA | . | .                         | .                                  |
| 0 .            | NA | . | .                         | .                                  |
| 0 .            | NA | . | CYT(PHO KEGC .            | REACTOME_GASTRIN_CREB_SIGN         |
| 0 .            | NA | . | CYT(PHO KEGC .            | REACTOME_GASTRIN_CREB_SIGN         |
| 0 .            | NA | . | KEGC .                    | .                                  |
| 0 Renal tubu   | NA | . | SYS' CELI .               | KEGC . REACTOME_INSULIN_RECEPTOR_I |
| 0 .            | NA | . | .                         | .                                  |
| 0 .            | NA | . | .                         | .                                  |
| 0 .            | NA | . | .                         | .                                  |
| 0 .            | NA | . | .                         | .                                  |
| 0 .            | NA | . | .                         | .                                  |
| 0 .            | NA | . | .                         | .                                  |
| 0 .            | NA | . | IDEN KEGC .               | .                                  |
| 0 .            | NA | . | .                         | .                                  |
| 0 Cortical dy  | NA | . | KEGC .                    | .                                  |
| 0 .            | NA | . | .                         | .                                  |
| 0 .            | NA | . | PID .                     | .                                  |
| 0 .            | NA | . | .                         | .                                  |
| 0 {Alzheimer   | NA | . | CYT(OXIL KEGC(PID.BIO     | REACTOME_TETRAHYDROBIOPTET         |
| 0 .            | NA | . | ORG .                     | .                                  |
| 0 .            | NA | . | SYS' AXO PHO KEGC(PID.BIO | REACTOME_DEVELOPMENTAL_BIC         |
| 0 .            | NA | . | .                         | .                                  |
| 0 Cardiomyo    | NA | . | KEGC .                    | BIO REACTOME_ACTIVATED_AMPK_ST     |
| 0 Cardiomyo    | NA | . | KEGC .                    | BIO REACTOME_ACTIVATED_AMPK_ST     |
| 0 .            | NA | . | .                         | .                                  |
| 0 .            | NA | . | .                         | .                                  |
| 0 Ventricular  | NA | . | .                         | .                                  |
| 0 .            | NA | . | PRO . ACIL KEGC .         | REACTOME_IMMUNE_SYSTEM;REA         |

|               |    |   |                           |                             |                             |
|---------------|----|---|---------------------------|-----------------------------|-----------------------------|
| 0 .           | NA | . | BIOF INTR PRO KEGC.       | .                           | .                           |
| 0 .           | NA | . | BIOF INTR PRO KEGC.       | .                           | .                           |
| 0 .           | NA | . | .                         | .                           | .                           |
| 0 .           | NA | . | .                         | .                           | .                           |
| 0 Ceroid lipo | NA | . | SYS CYT(                  | .                           | .                           |
| 0 .           | NA | . | .                         | .                           | .                           |
| 0 .           | NA | . | .                         | .                           | REACTOME_DEFENSINS;REACTOM  |
| 0 .           | NA | . | .                         | .                           | .                           |
| 0 .           | NA | . | .                         | .                           | .                           |
| 0 .           | NA | . | CAL(CELI IDEN KEGC.       | .                           | .                           |
| 0 Occult mar  | NA | . | .                         | .                           | .                           |
| 0 .           | NA | . | .                         | .                           | .                           |
| 0 .           | NA | . | .                         | .                           | .                           |
| 0 .           | NA | . | .                         | .                           | .                           |
| 0 .           | NA | . | .                         | .                           | .                           |
| 0 .           | NA | . | .                         | .                           | .                           |
| 0 .           | NA | . | .                         | .                           | .                           |
| 0 .           | NA | . | .                         | .                           | .                           |
| 0 .           | NA | . | .                         | .                           | .                           |
| 0 Colorectal  | NA | . | REG . GTP . PID .         | REACTOME_SIGNALING_BY_RHO_( |                             |
| 0 Mental retz | NA | . | GLY(ORG TRAI KEGC.        | REACTOME_METABOLISM_OF_PRC  |                             |
| 0 .           | NA | . | .                         | .                           | .                           |
| 0 .           | NA | . | .                         | .                           | .                           |
| 0 Alopecia ui | NA | . | .                         | .                           | .                           |
| 0 .           | NA | . | SIGN . REC KEGC(PID.BIO . | .                           | .                           |
| 0 .           | NA | . | .                         | .                           | .                           |
| 0 Persistent  | NA | . | SYS . TRAI .              | .                           | .                           |
| 0 .           | NA | . | .                         | .                           | REACTOME_FACTORS_INVOLVED_  |
| 0 .           | NA | . | .                         | .                           | .                           |
| 0 .           | NA | . | .                         | .                           | .                           |
| 0 {Hyperchol  | NA | . | .                         | KEGC.                       | .                           |
| 0 .           | NA | . | EST)CYT(KINA . PID .      | .                           | .                           |
| 0 .           | NA | . | .                         | .                           | REACTOME_MEIOSIS;REACTOME_I |
| 0 .           | NA | . | .                         | .                           | .                           |
| 0 .           | NA | . | .                         | .                           | .                           |
| 0 Spastic pai | NA | . | ORG .                     | .                           | .                           |
| 0 Hypogonac   | NA | . | SYS INTR TRAI KEGC(PID .  | REACTOME_DEVELOPMENTAL_BIC  |                             |
| 0 Hypogonac   | NA | . | SYS INTR TRAI KEGC(PID .  | REACTOME_DEVELOPMENTAL_BIC  |                             |
| 0 .           | NA | . | .                         | PID .                       | .                           |
| 0 .           | NA | . | GAM CELI .                | .                           | .                           |
| 0 .           | NA | . | .                         | .                           | .                           |
| 0 .           | NA | . | NEG NUC TRAI .            | .                           | .                           |
| 0 .           | NA | . | DNA ORG MICf KEGC.        | REACTOME_BASE_EXCISION_REP/ |                             |
| 0 .           | NA | . | .                         | .                           | .                           |
| 0 .           | NA | . | .                         | .                           | .                           |
| 0 .           | NA | . | .                         | .                           | .                           |
| 0 .           | NA | . | .                         | .                           | .                           |
| 0 .           | NA | . | .                         | .                           | .                           |
| 0 .           | NA | . | .                         | .                           | .                           |
| 0 .           | NA | . | .                         | .                           | .                           |
| 0 .           | NA | . | PRO .                     | .                           | .                           |
| 0 .           | NA | . | .                         | .                           | .                           |
| 0 .           | NA | . | .                         | .                           | .                           |
| 0 .           | NA | . | .                         | .                           | .                           |
| 0 .           | NA | . | .                         | .                           | .                           |

|                |    |   |        |            |        |        |       |                             |
|----------------|----|---|--------|------------|--------|--------|-------|-----------------------------|
| 0 .            | NA | . | MEM    | CYT        | REC .  | PID    | BIO . |                             |
| 0 Cerebellar   | NA | . | .      | .          | HYD    | KEGC . | .     | .                           |
| 0 CHARGE       | NA | . | .      | .          | .      | PID .  | .     | .                           |
| 0 .            | NA | . | .      | .          | HYD    | KEGC . | .     | REACTOME_SIGNALING_BY_GPCR  |
| 0 .            | NA | . | .      | .          | .      | .      | .     | .                           |
| 0 .            | NA | . | .      | .          | .      | .      | .     | .                           |
| 0 .            | NA | . | SIGN . | RAS .      | .      | PID .  | .     | .                           |
| 0 .            | NA | . | .      | .          | .      | .      | .     | .                           |
| 0 .            | NA | . | .      | .          | .      | .      | .     | .                           |
| 0 .            | NA | . | .      | .          | CYT    | LIPII  | KEGC  | PID .                       |
| 0 Achromato    | NA | . | SEN .  | .          | .      | PID .  | .     | .                           |
| 0 Achromato    | NA | . | SEN .  | .          | .      | PID .  | .     | .                           |
| 0 .            | NA | . | .      | .          | .      | .      | .     | .                           |
| 0 ?DECR de     | NA | . | .      | .          | CYT    | OXIE . | .     | REACTOME_MITOCHONDRIAL_FAT  |
| 0 ?DECR de     | NA | . | .      | .          | CYT    | OXIE . | .     | REACTOME_MITOCHONDRIAL_FAT  |
| 0 .            | NA | . | GEN .  | TRAI       | KEGC . | .      | .     | .                           |
| 0 .            | NA | . | .      | .          | .      | .      | .     | .                           |
| 0 .            | NA | . | .      | .          | .      | .      | .     | .                           |
| 0 .            | NA | . | .      | .          | .      | .      | .     | .                           |
| 0 .            | NA | . | .      | .          | .      | .      | .     | .                           |
| 0 .            | NA | . | .      | .          | .      | .      | .     | .                           |
| 0 .            | NA | . | EST .  | AUX .      | .      | .      | .     | REACTOME_NEURONAL_SYSTEM;F  |
| 0 .            | NA | . | .      | .          | .      | .      | .     | .                           |
| 0 .            | NA | . | .      | .          | .      | .      | .     | .                           |
| 0 .            | NA | . | .      | .          | .      | .      | .     | .                           |
| 0 .            | NA | . | .      | .          | .      | .      | .     | .                           |
| 0 Ciliary dyst | NA | . | .      | .          | .      | .      | .     | .                           |
| 0 Thyroid dyst | NA | . | .      | .          | .      | KEGC . | .     | .                           |
| 0 Birk-Barel   | NA | . | .      | .          | .      | .      | .     | REACTOME_NEURONAL_SYSTEM;F  |
| 0 Mental retz  | NA | . | .      | .          | .      | .      | .     | .                           |
| 0 .            | NA | . | .      | .          | .      | .      | .     | .                           |
| 0 .            | NA | . | .      | .          | .      | .      | .     | .                           |
| 0 .            | NA | . | SYS    | INTRG_PI   | KEGC . | .      | .     | .                           |
| 0 .            | NA | . | SYS    | .          | .      | .      | .     | .                           |
| 0 .            | NA | . | .      | .          | .      | .      | .     | .                           |
| 0 Amelogen     | NA | . | .      | .          | .      | .      | .     | .                           |
| 0 Amelogen     | NA | . | .      | .          | .      | .      | .     | .                           |
| 0 .            | NA | . | .      | .          | .      | .      | .     | .                           |
| 0 .            | NA | . | .      | .          | .      | .      | .     | .                           |
| 0 .            | NA | . | .      | .          | .      | .      | .     | .                           |
| 0 Epidermol    | NA | . | .      | .          | STRI . | .      | .     | REACTOME_APOPTOTIC_CLEAVAG  |
| 0 .            | NA | . | .      | .          | TRAI . | PID .  | .     | .                           |
| 0 .            | NA | . | .      | .          | TRAI . | PID .  | .     | .                           |
| 0 .            | NA | . | .      | .          | .      | .      | .     | .                           |
| 0 .            | NA | . | .      | .          | .      | .      | .     | .                           |
| 0 .            | NA | . | .      | .          | .      | .      | .     | .                           |
| 0 {?Schizop    | NA | . | EST    | INTRACTI . | .      | .      | .     | REACTOME_Glutamate_NEUROT   |
| 0 Hydroceph    | NA | . | .      | .          | .      | KEGC . | .     | .                           |
| 0 .            | NA | . | .      | .          | NUC    | TRAI . | PID . | REACTOME_RNA_POL_III_TRANSC |
| 0 Bifid nose   | NA | . | .      | .          | .      | .      | .     | .                           |
| 0 Bifid nose   | NA | . | .      | .          | .      | .      | .     | .                           |
| 0 .            | NA | . | .      | .          | .      | .      | .     | .                           |
| 0 .            | NA | . | .      | .          | .      | .      | .     | .                           |



|     |                 |   |        |           |        |        |                            |                             |                             |
|-----|-----------------|---|--------|-----------|--------|--------|----------------------------|-----------------------------|-----------------------------|
| 0 . | NA              | . | .      | .         | .      | .      | .                          | .                           | .                           |
| 0 . | NA              | . | .      | .         | .      | .      | .                          | .                           | .                           |
| 0 . | NA              | . | .      | .         | .      | .      | PID .                      | .                           | .                           |
| 0 . | NA              | . | .      | .         | .      | .      | PID .                      | .                           | .                           |
| 0 . | NA              | . | .      | NUC .     | .      | .      | .                          | .                           | .                           |
| 0 . | NA              | . | POS    | CYT(NUC . | .      | .      | .                          | .                           | .                           |
| 0 . | NA              | . | .      | .         | .      | .      | PID .                      | REACTOME_SIGNALLING_BY_NGF; | .                           |
| 0 . | NA              | . | .      | .         | .      | .      | .                          | .                           | .                           |
| 0   | Charcot-M: NA   | . | .      | .         | .      | .      | .                          | REACTOME_IMMUNE_SYSTEM;REA  | .                           |
| 0   | Epileptic ei NA | . | .      | .         | .      | .      | .                          | REACTOME_Glutamate_NEUROT   | .                           |
| 0 . | NA              | . | .      | .         | .      | .      | .                          | .                           | .                           |
| 0 . | NA              | . | NUC    | CYT(ACIC  | KEGC . | .      | .                          | REACTOME_METABOLISM_OF_VIT/ | .                           |
| 0   | Telangiectr NA  | . | REG    | INTR .    | .      | PID .  | .                          | .                           | .                           |
| 0 . | NA              | . | .      | .         | STRI . | PID .  | .                          | .                           | .                           |
| 0   | Epileptic ei NA | . | .      | ORG       | ACTI   | KEGC   | PID                        | BIO                         | REACTOME_APOPTOTIC_CLEAVAG  |
| 0   | Epileptic ei NA | . | .      | ORG       | ACTI   | KEGC   | PID                        | BIO                         | REACTOME_APOPTOTIC_CLEAVAG  |
| 0   | Epileptic ei NA | . | .      | ORG       | ACTI   | KEGC   | PID                        | BIO                         | REACTOME_APOPTOTIC_CLEAVAG  |
| 0   | Epileptic ei NA | . | .      | ORG       | ACTI   | KEGC   | PID                        | BIO                         | REACTOME_APOPTOTIC_CLEAVAG  |
| 0 . | NA              | . | REG    | UBIC      | ACIC . | .      | .                          | .                           | .                           |
| 0 . | NA              | . | AMI    | CYT( .    | .      | .      | .                          | REACTOME_METABOLISM_OF_AMI  | .                           |
| 0 . | NA              | . | AMI    | CYT( .    | .      | .      | .                          | REACTOME_METABOLISM_OF_AMI  | .                           |
| 0 . | NA              | . | GLY(   | ORG       | HYD    | KEGC . | .                          | REACTOME_METABOLISM_OF_PRC  | .                           |
| 0   | ?Carnitine NA   | . | GEN .  | .         | KEGC . | .      | .                          | REACTOME_PEROXISOMAL_LIPID_ | .                           |
| 0   | ?Carnitine NA   | . | GEN .  | .         | KEGC . | .      | .                          | REACTOME_PEROXISOMAL_LIPID_ | .                           |
| 0 . | NA              | . | ENZ' . | .         | KEGC   | PID    | BIO                        | REACTOME_SIGNALLING_BY_NGF; | .                           |
| 0 . | NA              | . | SYS'   | INTR .    | .      | .      | .                          | .                           | .                           |
| 0   | Amyotroph NA    | . | DNA    | NUC       | DNA .  | .      | .                          | .                           | .                           |
| 0 . | NA              | . | .      | .         | .      | .      | .                          | .                           | .                           |
| 0 . | NA              | . | .      | NUC .     | .      | .      | .                          | REACTOME_RNA_POL_III_TRANSC | .                           |
| 0 . | NA              | . | .      | .         | GTP    | KEGC   | PID                        | BIO                         | REACTOME_SIGNALLING_BY_NGF; |
| 0 . | NA              | . | GLY( . | .         | KEGC . | .      | .                          | .                           | .                           |
| 0 . | NA              | . | .      | CYT( .    | .      | .      | .                          | .                           | .                           |
| 0 . | NA              | . | .      | .         | .      | .      | .                          | .                           | .                           |
| 0 . | NA              | . | .      | .         | .      | .      | .                          | .                           | .                           |
| 0   | Dopamine NA     | . | CELI   | CYT( .    | KEGC . | BIO    | REACTOME_METABOLISM_OF_AMI | .                           | .                           |
| 0   | Ehlers-Dar NA   | . | .      | PRO .     | KEGC   | PID .  | REACTOME_DEVELOPMENTAL_BIC | .                           | .                           |
| 0   | Ehlers-Dar NA   | . | .      | PRO .     | KEGC   | PID .  | REACTOME_DEVELOPMENTAL_BIC | .                           | .                           |
| 0   | Ehlers-Dar NA   | . | .      | PRO .     | KEGC   | PID .  | REACTOME_DEVELOPMENTAL_BIC | .                           | .                           |
| 0 . | NA              | . | .      | .         | .      | .      | .                          | .                           | .                           |
| 0 . | NA              | . | .      | .         | .      | .      | .                          | .                           | .                           |
| 0   | Aortic valv NA  | . | MUS    | NUC .     | KEGC   | PID    | BIO .                      | .                           | .                           |
| 0   | Aortic valv NA  | . | MUS    | NUC .     | KEGC   | PID    | BIO .                      | .                           | .                           |
| 0   | Aortic valv NA  | . | MUS    | NUC .     | KEGC   | PID    | BIO .                      | .                           | .                           |
| 0 . | NA              | . | .      | .         | .      | .      | .                          | .                           | .                           |
| 0 . | NA              | . | .      | .         | .      | .      | .                          | .                           | .                           |
| 0 . | NA              | . | POS .  | .         | KEGC   | PID    | BIO                        | REACTOME_EXTRINSIC_PATHWAY  | .                           |
| 0   | Mental retz NA  | . | OLIG   | INTR      | CATI   | KEGC . | .                          | REACTOME_METABOLISM_OF_PRC  | .                           |
| 0   | Hypophosph NA   | . | REG    | MEM       | CATI . | .      | .                          | REACTOME_TRANSMEMBRANE_TF   | .                           |
| 0 . | NA              | . | .      | .         | .      | .      | .                          | .                           | .                           |
| 0 . | NA              | . | .      | .         | .      | .      | .                          | .                           | .                           |
| 0 . | NA              | . | .      | .         | .      | .      | .                          | .                           | .                           |
| 0   | Kleefstra s NA  | . | ONE .  | HIST      | KEGC . | .      | .                          | .                           | .                           |
| 0 . | NA              | . | .      | .         | .      | .      | .                          | .                           | .                           |
| 0 . | NA              | . | REG    | CYT(      | HYD .  | .      | .                          | .                           | .                           |

|    |             |    |      |           |                   |                            |                             |
|----|-------------|----|------|-----------|-------------------|----------------------------|-----------------------------|
| 0. | NA          | .  | .    | HYD.      | .                 | .                          | .                           |
| 0. | NA          | .  | PRO  | ORGMET.   | .                 | .                          | .                           |
| 0. | NA          | .  | .    | .         | .                 | .                          | .                           |
| 0. | NA          | .  | .    | .         | .                 | .                          | .                           |
| 0. | NA          | .  | .    | .         | .                 | .                          | .                           |
| 0. | NA          | .  | .    | .         | .                 | .                          | .                           |
| 0. | NA          | .  | MAIN | NUC.      | .                 | .                          | .                           |
| 0. | NA          | .  | MAIN | NUC.      | .                 | .                          | .                           |
| 0. | NA          | .  | .    | .         | .                 | .                          | .                           |
| 0. | NA          | .  | .    | .         | .                 | .                          | .                           |
| 0. | NA          | .  | .    | .         | .                 | .                          | .                           |
| 0  | Megaloblast | NA | EST/ | MEM/PRO.  | .                 | .                          | REACTOME_METABOLISM_OF_STE  |
| 0  | Megaloblast | NA | EST/ | MEM/PRO.  | .                 | .                          | REACTOME_METABOLISM_OF_STE  |
| 0. | NA          | .  | .    | .         | .                 | .                          | .                           |
| 0. | NA          | .  | NEG  | CYT(ENZ). | .                 | .                          | .                           |
| 0. | NA          | .  | SYS  | CYT(.     | .                 | .                          | .                           |
| 0. | NA          | .  | .    | .         | .                 | .                          | .                           |
| 0. | NA          | .  | .    | .         | .                 | .                          | .                           |
| 0  | Deafness,   | NA | PRO  | ORGHYD.   | .                 | .                          | .                           |
| 0. | NA          | .  | .    | .         | .                 | .                          | REACTOME_INTEGRIN_CELL_SURF |
| 0  | Thrombocy   | NA | .    | .         | .                 | .                          | .                           |
| 0  | Thrombocy   | NA | .    | .         | .                 | .                          | .                           |
| 0. | NA          | .  | .    | .         | .                 | .                          | .                           |
| 0. | NA          | .  | MUS  | CYT(ACTI. | PID.              | .                          | .                           |
| 0. | NA          | .  | .    | .         | .                 | .                          | .                           |
| 0. | NA          | .  | .    | NUC.      | .                 | .                          | .                           |
| 0. | NA          | .  | .    | .         | .                 | .                          | .                           |
| 0. | NA          | .  | .    | .         | .                 | .                          | .                           |
| 0. | NA          | .  | .    | .         | .                 | .                          | .                           |
| 0. | NA          | .  | .    | .         | .                 | .                          | .                           |
| 0. | NA          | .  | .    | .         | .                 | .                          | .                           |
| 0. | NA          | .  | .    | .         | .                 | .                          | .                           |
| 0. | NA          | .  | .    | .         | .                 | .                          | .                           |
| 0. | NA          | .  | .    | .         | .                 | .                          | .                           |
| 0. | NA          | .  | .    | .         | .                 | .                          | .                           |
| 0  | Myasthenic  | NA | .    | CYT(.     | KEGC.             | .                          | REACTOME_PHOSPHOLIPID_META  |
| 0. | NA          | .  | .    | .         | .                 | .                          | .                           |
| 0  | Deafness,   | NA | REG  | NON.      | .                 | .                          | .                           |
| 0. | NA          | .  | .    | .         | .                 | .                          | .                           |
| 0. | NA          | .  | .    | .         | .                 | .                          | .                           |
| 0  | Thyroid pa  | NA | .    | STR/      | KEGC.             | .                          | .                           |
| 0. | NA          | .  | .    | .         | .                 | .                          | .                           |
| 0. | NA          | .  | DNA  | ORGDNA.   | .                 | .                          | .                           |
| 0. | NA          | .  | SYS  | PRO CAR.  | PID.              | .                          | REACTOME_EXTRACELLULAR_MAT  |
| 0. | NA          | .  | CELI | ORGNUC.   | PID.              | .                          | .                           |
| 0  | Hemophag    | NA | MUL. | .         | KEGC(PID.BIO.     | .                          | .                           |
| 0  | Deafness,   | NA | REG  | NON.      | .                 | .                          | .                           |
| 0. | NA          | .  | .    | CYT(OXIL  | KEGC.             | .                          | .                           |
| 0. | NA          | .  | .    | .         | .                 | .                          | .                           |
| 0. | NA          | .  | .    | PRO       | CATI/KEGC(PID.BIO | REACTOME_SIGNALING_BY_GPCR | .                           |
| 0. | NA          | .  | .    | .         | .                 | .                          | .                           |
| 0. | NA          | .  | .    | .         | .                 | .                          | .                           |
| 0. | NA          | .  | .    | .         | .                 | .                          | .                           |
| 0. | NA          | .  | .    | .         | .                 | .                          | .                           |
| 0. | NA          | .  | REG  | MEM/      | CAR.              | PID.                       | .                           |
| 0. | NA          | .  | .    | .         | .                 | .                          | .                           |



|   |              |    |   |            |       |       |                             |                             |                             |                            |
|---|--------------|----|---|------------|-------|-------|-----------------------------|-----------------------------|-----------------------------|----------------------------|
| 0 | Cone-rod c   | NA | . | .          | .     | .     | .                           | .                           | .                           |                            |
| 0 | .            | NA | . | ORG.       | .     | .     | .                           | .                           | .                           |                            |
| 0 | .            | NA | . | .          | KEGC. | .     | .                           | .                           | .                           |                            |
| 0 | .            | NA | . | .          | .     | .     | .                           | .                           | .                           |                            |
| 0 | .            | NA | . | .          | .     | .     | .                           | .                           | .                           |                            |
| 0 | .            | NA | . | SYS' MEM.  | .     | PID.  | .                           | .                           | .                           |                            |
| 0 | .            | NA | . | .          | .     | .     | .                           | .                           | .                           |                            |
| 0 | Rhabdomy     | NA | . | .          | KEGC. | .     | REACTOME_BIOLOGICAL_OXIDATI | .                           | .                           |                            |
| 0 | .            | NA | . | .          | .     | .     | .                           | .                           | .                           |                            |
| 0 | Agammagl     | NA | . | SYS'.      | MOL   | KEGC  | PID                         | BIO                         | REACTOME_ANTIGEN_ACTIVATES_ |                            |
| 0 | .            | NA | . | .          | .     | .     | .                           | .                           | .                           |                            |
| 0 | Spastic pa   | NA | . | .          | .     | .     | .                           | .                           | .                           |                            |
| 0 | .            | NA | . | .          | .     | .     | .                           | .                           | .                           |                            |
| 0 | Urofacial s  | NA | . | .          | HYD   | KEGC. | .                           | REACTOME_HS_GAG_DEGRADATI   | .                           |                            |
| 0 | .            | NA | . | .          | .     | .     | .                           | .                           | .                           |                            |
| 0 | .            | NA | . | .          | .     | .     | .                           | .                           | .                           |                            |
| 0 | .            | NA | . | .          | .     | KEGC. | .                           | .                           | .                           |                            |
| 0 | .            | NA | . | .          | .     | .     | .                           | .                           | .                           |                            |
| 0 | Epidermoly   | NA | . | SYS' INTR. | .     | PID.  | .                           | REACTOME_CELL_CELL_COMMUNI  | .                           |                            |
| 0 | .            | NA | . | .          | .     | .     | .                           | .                           | .                           |                            |
| 0 | .            | NA | . | .          | .     | .     | .                           | REACTOME_SIGNALLING_BY_NGF; | .                           |                            |
| 0 | .            | NA | . | .          | REC.  | PID.  | .                           | REACTOME_DEVELOPMENTAL_BIC  | .                           |                            |
| 0 | .            | NA | . | .          | .     | .     | .                           | .                           | .                           |                            |
| 0 | .            | NA | . | RNA        | CYT   | RNA.  | .                           | .                           | .                           |                            |
| 0 | .            | NA | . | .          | .     | .     | .                           | .                           | .                           |                            |
| 0 | .            | NA | . | .          | .     | .     | .                           | .                           | .                           |                            |
| 0 | .            | NA | . | CELI       | CYT   | GTP.  | KEGC                        | PID                         | BIO                         | REACTOME_DEVELOPMENTAL_BIC |
| 0 | .            | NA | . | CELI       | CYT   | GTP.  | KEGC                        | PID                         | BIO                         | REACTOME_DEVELOPMENTAL_BIC |
| 0 | .            | NA | . | .          | .     | .     | .                           | .                           | .                           |                            |
| 0 | .            | NA | . | .          | .     | KEGC. | .                           | BIO.                        | .                           |                            |
| 0 | .            | NA | . | .          | .     | .     | .                           | .                           | .                           |                            |
| 0 | .            | NA | . | .          | .     | .     | .                           | .                           | .                           |                            |
| 0 | .            | NA | . | .          | .     | KEGC  | PID.                        | .                           | REACTOME_METABOLISM_OF_AMI  |                            |
| 0 | .            | NA | . | .          | .     | KEGC  | PID.                        | .                           | REACTOME_METABOLISM_OF_AMI  |                            |
| 0 | .            | NA | . | .          | .     | KEGC  | PID.                        | .                           | REACTOME_METABOLISM_OF_AMI  |                            |
| 0 | .            | NA | . | .          | .     | .     | .                           | .                           | .                           |                            |
| 0 | .            | NA | . | .          | .     | .     | .                           | .                           | .                           |                            |
| 0 | .            | NA | . | .          | .     | .     | .                           | .                           | .                           |                            |
| 0 | .            | NA | . | PRO.       | KEGC. | .     | REACTOME_SIGNALING_BY_WNT;F | .                           | .                           |                            |
| 0 | .            | NA | . | SYS' EXT   | ENZ'. | .     | .                           | .                           | .                           |                            |
| 0 | .            | NA | . | .          | .     | .     | .                           | .                           | .                           |                            |
| 0 | .            | NA | . | .          | .     | .     | .                           | .                           | .                           |                            |
| 0 | .            | NA | . | .          | .     | .     | .                           | .                           | .                           |                            |
| 0 | Epileptic ei | NA | . | EST        | ORG   | ACTI. | .                           | .                           | .                           |                            |
| 0 | .            | NA | . | .          | .     | KEGC. | .                           | REACTOME_SIGNALLING_BY_NGF; | .                           |                            |
| 0 | .            | NA | . | .          | .     | .     | .                           | .                           | .                           |                            |
| 0 | {Pulmonar    | NA | . | .          | .     | .     | .                           | REACTOME_O_LINKED_GLYCOSYL  | .                           |                            |
| 0 | {Pulmonar    | NA | . | .          | .     | .     | .                           | REACTOME_O_LINKED_GLYCOSYL  | .                           |                            |
| 0 | {Pulmonar    | NA | . | .          | .     | .     | .                           | REACTOME_O_LINKED_GLYCOSYL  | .                           |                            |
| 0 | {Pulmonar    | NA | . | .          | .     | .     | .                           | REACTOME_O_LINKED_GLYCOSYL  | .                           |                            |
| 0 | {Pulmonar    | NA | . | .          | .     | .     | .                           | REACTOME_O_LINKED_GLYCOSYL  | .                           |                            |

|                             |    |      |      |      |      |     |                              |                              |
|-----------------------------|----|------|------|------|------|-----|------------------------------|------------------------------|
| 0 Segawa syndrome           | NA | ANA  | OXIL | KEGG | PID  | BIO | REACTOME_METABOLISM_OF_AMINO |                              |
| 0                           | NA |      |      |      |      |     |                              |                              |
| 0 Immunodeficiency          | NA | PHO  | INTR | KEGG | PID  |     | REACTOME_IMMUNOREGULATORY    |                              |
| 0                           | NA |      | INTR | SUB  | KEGG |     |                              |                              |
| 0                           | NA |      | INTR | SUB  | KEGG |     |                              |                              |
| 0                           | NA |      |      |      |      |     |                              |                              |
| 0                           | NA |      |      |      | KEGG |     | REACTOME_SIGNALING_BY_GPCR   |                              |
| 0                           | NA |      |      |      |      |     |                              |                              |
| 0                           | NA |      |      |      |      |     |                              |                              |
| 0                           | NA |      |      |      |      |     |                              |                              |
| 0                           | NA | REG  | NUC  | TRAI | KEGG | PID |                              |                              |
| 0                           | NA |      |      |      |      |     |                              |                              |
| 0                           | NA |      |      |      |      |     |                              |                              |
| 0                           | NA |      |      |      |      |     |                              |                              |
| 0                           | NA |      |      |      |      |     |                              |                              |
| 0                           | NA | RNA  | NUC  |      | KEGG | PID | REACTOME_BMAL1_CLOCK_NPAS2   |                              |
| 0                           | NA |      |      |      |      |     |                              |                              |
| 0 Ovarian carcinoma         | NA |      |      | HYD  | KEGG |     |                              |                              |
| 0                           | NA |      |      | HYD  | KEGG | BIO | REACTOME_INSULIN_RECEPTOR_S  |                              |
| 0 Rickets due to            | NA |      |      |      |      |     | REACTOME_METABOLISM_OF_STE   |                              |
| 0                           | NA |      |      |      | PID  |     |                              |                              |
| 0                           | NA |      |      |      | PID  |     |                              |                              |
| 0 Deafness, congenital      | NA |      |      |      |      |     |                              |                              |
| 0                           | NA |      |      |      | KEGG | BIO | REACTOME_METABOLISM_OF_AMINO |                              |
| 0                           | NA |      |      |      |      |     |                              |                              |
| 0                           | NA | REG  | G    | PI   | PID  |     | REACTOME_TRIF_MEDIATED_TLR3  |                              |
| 0 Glycogen storage disease  | NA |      | CYT  | OXIL | KEGG | PID | BIO                          | REACTOME_PYRUVATE_METABOLISM |
| 0 Hyperekplexia             | NA | CELI | CATI |      |      |     | REACTOME_TRANSMEMBRANE_TRAN  |                              |
| 0                           | NA | SYS  |      |      |      |     |                              |                              |
| 0                           | NA | CELI | ORG  |      | PID  | BIO | REACTOME_APOPTOTIC_CLEAVAGE  |                              |
| 0                           | NA |      |      |      |      |     |                              |                              |
| 0 Hemolytic uremic syndrome | NA | REG  | CELI |      | KEGG |     |                              |                              |
| 0                           | NA |      |      |      |      |     |                              |                              |
| 0                           | NA |      |      |      | KEGG |     | REACTOME_TRIGLYCERIDE_BIOSYN |                              |
| 0                           | NA |      |      | IDEN |      |     |                              |                              |
| 0                           | NA | EST  | ORG  |      | PID  |     | REACTOME_CELL_CYCLE;REACTO   |                              |
| 0                           | NA |      |      |      | KEGG |     |                              |                              |
| 0                           | NA |      |      |      | KEGG |     | REACTOME_SIGNALING_BY_GPCR   |                              |
| 0                           | NA |      |      |      |      |     |                              |                              |
| 0                           | NA |      |      |      |      |     |                              |                              |
| 0                           | NA |      |      |      | KEGG |     | REACTOME_SIGNALING_BY_GPCR   |                              |
| 0                           | NA |      |      |      | KEGG |     | REACTOME_SIGNALING_BY_GPCR   |                              |
| 0                           | NA |      |      |      | KEGG |     | REACTOME_MRNA_DECAY_BY_5_T   |                              |
| 0                           | NA |      |      |      |      |     |                              |                              |
| 0                           | NA |      |      |      |      |     |                              |                              |
| 0                           | NA | PHO  |      | OXIL | KEGG |     | REACTOME_PPARA_ACTIVATES_G   |                              |
| 0                           | NA |      |      |      |      |     |                              |                              |
| 0                           | NA | ORG  |      |      | PID  |     |                              |                              |
| 0                           | NA | RNA  | NUC  |      |      |     |                              |                              |
| 0                           | NA |      |      |      |      |     | REACTOME_PROCESSING_OF_CAI   |                              |
| 0                           | NA |      |      |      |      |     |                              |                              |
| 0                           | NA |      |      |      |      |     |                              |                              |
| 0                           | NA | CELI |      |      | KEGG | PID | BIO                          | REACTOME_SIGNALLING_BY_NGF;  |
| 0 McArdle disease           | NA | GLU  |      | TRAI | KEGG | BIO | REACTOME_GLYCOGEN_BREAKDOWN  |                              |
| 0                           | NA | BIO  | CYT  | ACIL | KEGG |     | REACTOME_DIABETES_PATHWAYS   |                              |

|     |                 |    |       |          |       |          |                                     |
|-----|-----------------|----|-------|----------|-------|----------|-------------------------------------|
| 0 . | NA              | .  | .     | NUC KINA | KEGC. | .        | .                                   |
| 0 . | NA              | .  | .     | .        | KEGC. | .        | REACTOME_ACTIVATION_OF_THE          |
| 0 . | NA              | .  | EST/  | CATI.    | .     | .        | REACTOME_NEURONAL_SYSTEM;F          |
| 0 . | NA              | .  | PRO   | ORG      | PHO   | KEGC     | (PID,BIO .                          |
| 0 . | NA              | .  | .     | .        | .     | .        | .                                   |
| 0   | Metastasis      | NA | .     | CELI.    | GTP.  | KEGC     | (PID . REACTOME_RAP1_SIGNALLING;RE  |
| 0   | Metastasis      | NA | .     | CELI.    | GTP.  | KEGC     | (PID . REACTOME_RAP1_SIGNALLING;RE  |
| 0   | Aicardi-Go      | NA | .     | .        | .     | KEGC.    | .                                   |
| 0 . | NA              | .  | .     | .        | .     | .        | .                                   |
| 0 . | NA              | .  | .     | ORG.     | .     | .        | REACTOME_MHC_CLASS_II_ANTIG         |
| 0 . | NA              | .  | .     | PRO.     | .     | .        | .                                   |
| 0 . | NA              | .  | .     | .        | .     | .        | .                                   |
| 0 . | NA              | .  | BIOF. | PHO      | KEGC  | (PID,BIO | REACTOME_DOWNREGULATION_C           |
| 0   | Mitochondri     | NA | .     | ORG.     | KEGC. | .        | REACTOME_TCA_CYCLE_AND_RES          |
| 0   | Osteopetrc      | NA | .     | POS      | INTR. | KEGC.    | REACTOME_INSULIN_RECEPTOR_I         |
| 0   | [Skin/hair/ε    | NA | .     | .        | .     | .        | .                                   |
| 0   | [Skin/hair/ε    | NA | .     | .        | .     | .        | .                                   |
| 0 . | NA              | .  | SIG   | CYT(.    | .     | .        | .                                   |
| 0   | Smith-Lem       | NA | .     | BIO      | ORG   | OXIL     | KEGC . REACTOME_METABOLISM_OF_LIPI  |
| 0   | Deafness,       | NA | .     | .        | .     | .        | .                                   |
| 0 . | NA              | .  | EST/  | CELI     | VITA. | .        | .                                   |
| 0 . | NA              | .  | .     | .        | .     | .        | .                                   |
| 0 . | NA              | .  | .     | .        | .     | .        | .                                   |
| 0 . | NA              | .  | REG   | CYT(     | RAS   | KEGC     | (PID . REACTOME_SIGNALING_BY_RHO_   |
| 0 . | NA              | .  | .     | .        | .     | .        | .                                   |
| 0 . | NA              | .  | BIOF. | PRO.     | .     | .        | .                                   |
| 0 . | NA              | .  | LIPI  | INTR.    | KEGC. | .        | REACTOME_GLYCOSPHINGOLIPID_         |
| 0 . | NA              | .  | .     | .        | .     | .        | REACTOME_TRANSMEMBRANE_TR           |
| 0 . | NA              | .  | .     | .        | .     | .        | .                                   |
| 0 . | NA              | .  | DNA   | CYT(.    | .     | .        | .                                   |
| 0 . | NA              | .  | .     | .        | .     | .        | .                                   |
| 0 . | NA              | .  | .     | .        | .     | .        | .                                   |
| 0 . | NA              | .  | .     | MEM      | PHO.  | .        | .                                   |
| 0 . | NA              | .  | G_PI  | INTR     | GLU'  | KEGC.    | .                                   |
| 0 . | NA              | .  | .     | .        | .     | .        | .                                   |
| 0 . | NA              | .  | .     | .        | .     | .        | .                                   |
| 0   | Asphyxiatir     | NA | .     | ORG      | CYT(. | KEGC.    | REACTOME_MHC_CLASS_II_ANTIG         |
| 0 . | NA              | .  | .     | .        | PHO   | KEGC.    | REACTOME_NITRIC_OXIDE_STIMUL        |
| 0 . | NA              | .  | .     | .        | .     | .        | .                                   |
| 0 . | NA              | .  | CELI. | CATI     | KEGC. | .        | REACTOME_SIGNALING_BY_ERBB2         |
| 0   | Alpha-metl      | NA | .     | .        | CYT(  | TRAI     | KEGC . REACTOME_METABOLISM_OF_AMI   |
| 0   | Ataxia-tela     | NA | .     | DNA .    | PHO   | KEGC     | (PID,BIO REACTOME_MEIOSIS;REACTOME_ |
| 0 . | NA              | .  | .     | .        | .     | .        | .                                   |
| 0 . | NA              | .  | .     | .        | .     | .        | .                                   |
| 0 . | NA              | .  | ENZ'  | CYT(     | NUC . | PID .    | .                                   |
| 0 . | NA              | .  | MIT   | ORG      | SEQ . | .        | REACTOME_CELL_CYCLE;REACTO          |
| 0 . | NA              | .  | POS   | CELI     | PRO   | KEGC.    | REACTOME_CELL_CELL_COMMUNI          |
| 0 . | NA              | .  | BIOF. | NUC .    | PID . | .        | .                                   |
| 0 . | NA              | .  | .     | .        | .     | .        | .                                   |
| 0   | Atrial fibrill; | NA | .     | EST/     | INTR  | CATI.    | REACTOME_DEVELOPMENTAL_BIC          |
| 0 . | NA              | .  | .     | .        | .     | .        | .                                   |
| 0 . | NA              | .  | EST/  | ORG.     | .     | .        | REACTOME_COPI_MEDIATED_TRAI         |
| 0 . | NA              | .  | .     | .        | RIBC  | RNA      | KEGC . REACTOME_MRNA_DECAY_BY_5_T   |
| 0   | Leukemia,       | NA | .     | .        | .     | KEGC     | (PID,BIO REACTOME_SIGNALING_BY_RHO_ |

|   |                |   |               |                                        |                                 |                                         |
|---|----------------|---|---------------|----------------------------------------|---------------------------------|-----------------------------------------|
| 0 | Leukemia, NA   | . | .             | .                                      | .                               | KEGCPID.BIO REACTOME_SIGNALING_BY_RHO_G |
| 0 | Deafness, NA   | . | SEN.          | .                                      | .                               | .                                       |
| 0 | . NA           | . | .             | .                                      | .                               | KEGC. REACTOME_SIGNALING_BY_GPCR        |
| 0 | . NA           | . | .             | .                                      | .                               | KEGC.                                   |
| 0 | . NA           | . | SYS`INTRREC.  | .                                      | .                               | .                                       |
| 0 | . NA           | . | .             | .                                      | .                               | .                                       |
| 0 | Leigh synd NA  | . | CYT(.         | .                                      | .                               | .                                       |
| 0 | . NA           | . | CELI CYT(.    | KEGCPID.                               | .                               | .                                       |
| 0 | . NA           | . | .             | .                                      | .                               | .                                       |
| 0 | . NA           | . | .             | .                                      | .                               | .                                       |
| 0 | {Ovarian c; NA | . | CELIINTRPEP`. | .                                      | .                               | .                                       |
| 0 | . NA           | . | .             | .                                      | .                               | .                                       |
| 0 | . NA           | . | .             | .                                      | .                               | .                                       |
| 0 | . NA           | . | .             | .                                      | .                               | .                                       |
| 0 | . NA           | . | .             | .                                      | .                               | .                                       |
| 0 | Neuropath NA   | . | EST/ CYT(NUC. | .                                      | .                               | .                                       |
| 0 | Brugada s) NA  | . | REG ORGCATI   | KEGC.                                  | .                               | .                                       |
| 0 | Brugada s) NA  | . | REG ORGCATI   | KEGC.                                  | .                               | .                                       |
| 0 | Brugada s) NA  | . | REG ORGCATI   | KEGC.                                  | .                               | .                                       |
| 0 | . NA           | . | .             | .                                      | .                               | .                                       |
| 0 | . NA           | . | POS MAC.      | KEGCPID.BIO REACTOME_CELL_CYCLE;       | REACTO                          |                                         |
| 0 | . NA           | . | SING.         | .                                      | .                               | .                                       |
| 0 | . NA           | . | EST/INTRCATI. | .                                      | REACTOME_NEURONAL_SYSTEM;       | F                                       |
| 0 | Periodic fe NA | . | RNA INTRREC   | KEGCPID.BIO REACTOME_EXTRINSIC_PATHWAY |                                 |                                         |
| 0 | . NA           | . | SYS`.         | .                                      | .                               | .                                       |
| 0 | OKT4 epitc NA  | . | SYS` MEM/KINA | KEGCPID.BIO REACTOME_NEF_MEDIATES_DOWI |                                 |                                         |
| 0 | . NA           | . | .             | .                                      | .                               | .                                       |
| 0 | . NA           | . | INTR.         | .                                      | .                               | .                                       |
| 0 | . NA           | . | .             | .                                      | .                               | .                                       |
| 0 | . NA           | . | STRI.         | PID.                                   | .                               | .                                       |
| 0 | . NA           | . | .             | .                                      | .                               | .                                       |
| 0 | . NA           | . | .             | .                                      | .                               | .                                       |
| 0 | . NA           | . | .             | .                                      | .                               | .                                       |
| 0 | . NA           | . | .             | .                                      | .                               | .                                       |
| 0 | Leukemia, NA   | . | TRAI          | KEGC.                                  | .                               | .                                       |
| 0 | . NA           | . | .             | .                                      | .                               | .                                       |
| 0 | . NA           | . | .             | .                                      | .                               | .                                       |
| 0 | . NA           | . | .             | .                                      | .                               | .                                       |
| 0 | . NA           | . | .             | KEGC.                                  | BIO REACTOME_SYNTHESIS_OF_PIPS_ |                                         |
| 0 | . NA           | . | .             | KEGC.                                  | BIO REACTOME_SYNTHESIS_OF_PIPS_ |                                         |
| 0 | . NA           | . | .             | .                                      | .                               | .                                       |
| 0 | Hyperbiliru NA | . | EST/INTRACTI. | .                                      | REACTOME_BILE_ACID_AND_BILE_    |                                         |
| 0 | . NA           | . | .             | .                                      | .                               | .                                       |
| 0 | . NA           | . | EST/ CYT(.    | .                                      | .                               | .                                       |
| 0 | . NA           | . | .             | .                                      | .                               | .                                       |
| 0 | . NA           | . | .             | .                                      | .                               | .                                       |
| 0 | . NA           | . | .             | .                                      | .                               | .                                       |
| 0 | . NA           | . | .             | .                                      | REACTOME_O_LINKED_GLYCOSYL      |                                         |
| 0 | . NA           | . | .             | .                                      | REACTOME_O_LINKED_GLYCOSYL      |                                         |
| 0 | . NA           | . | .             | .                                      | .                               | .                                       |
| 0 | . NA           | . | .             | .                                      | .                               | .                                       |
| 0 | . NA           | . | .             | KEGCPID.                               | REACTOME_SIGNALLING_BY_NGF;     |                                         |

|    |            |    |   |       |       |       |       |                             |
|----|------------|----|---|-------|-------|-------|-------|-----------------------------|
| 0. | NA         | .  | . | CYT.  | .     | .     | .     | .                           |
| 0. | NA         | .  | . | .     | .     | KEGC. | .     | .                           |
| 0. | NA         | .  | . | .     | .     | KEGC. | .     | .                           |
| 0. | NA         | .  | . | .     | .     | .     | .     | .                           |
| 0. | NA         | .  | . | .     | .     | .     | .     | .                           |
| 0. | NA         | .  | . | .     | .     | .     | .     | .                           |
| 0. | NA         | .  | . | .     | .     | .     | .     | .                           |
| 0. | NA         | .  | . | .     | .     | .     | .     | .                           |
| 0. | NA         | .  | . | .     | .     | .     | .     | .                           |
| 0  | Ichthyosis | NA | . | SYS   | ORG   | STRI. | .     | .                           |
| 0  | White spor | NA | . | ANA   | .     | .     | .     | .                           |
| 0. | NA         | .  | . | .     | .     | .     | .     | .                           |
| 0. | NA         | .  | . | .     | .     | .     | .     | .                           |
| 0. | NA         | .  | . | .     | .     | .     | .     | .                           |
| 0. | NA         | .  | . | .     | .     | .     | .     | .                           |
| 0. | NA         | .  | . | .     | .     | .     | .     | .                           |
| 0  | Deafness,  | NA | . | SEN   | ORG.  | .     | .     | .                           |
| 0. | NA         | .  | . | .     | .     | .     | .     | .                           |
| 0. | NA         | .  | . | LIPI  | INTR  | CAT   | KEGC  | PID.                        |
| 0. | NA         | .  | . | LIPI  | INTR  | CAT   | KEGC  | PID.                        |
| 0. | NA         | .  | . | LIPI  | INTR  | CAT   | KEGC  | PID.                        |
| 0. | NA         | .  | . | LIPI  | INTR  | CAT   | KEGC  | PID.                        |
| 0. | NA         | .  | . | .     | .     | .     | .     | .                           |
| 0. | NA         | .  | . | CYT.  | .     | KEGC. | .     | .                           |
| 0  | Spermatog  | NA | . | .     | .     | .     | .     | .                           |
| 0. | NA         | .  | . | .     | .     | .     | .     | .                           |
| 0. | NA         | .  | . | RNA.  | .     | .     | .     | .                           |
| 0. | NA         | .  | . | RNA.  | .     | .     | .     | .                           |
| 0. | NA         | .  | . | NUC   | TRAI. | PID.  | .     | .                           |
| 0. | NA         | .  | . | .     | .     | .     | .     | .                           |
| 0. | NA         | .  | . | .     | .     | .     | .     | REACTOME_ASSOCIATION_OF_TRI |
| 0. | NA         | .  | . | .     | .     | .     | .     | .                           |
| 0. | NA         | .  | . | .     | .     | .     | .     | .                           |
| 0. | NA         | .  | . | .     | .     | .     | .     | .                           |
| 0. | NA         | .  | . | .     | .     | .     | .     | .                           |
| 0. | NA         | .  | . | .     | .     | .     | .     | .                           |
| 0. | NA         | .  | . | .     | .     | .     | .     | .                           |
| 0. | NA         | .  | . | .     | .     | .     | .     | .                           |
| 0. | Deafness,  | NA | . | .     | .     | .     | .     | .                           |
| 0  | Deafness,  | NA | . | .     | .     | .     | .     | .                           |
| 0. | NA         | .  | . | .     | .     | .     | .     | .                           |
| 0. | NA         | .  | . | .     | .     | .     | .     | .                           |
| 0. | NA         | .  | . | .     | .     | .     | .     | .                           |
| 0. | NA         | .  | . | .     | .     | .     | .     | .                           |
| 0. | NA         | .  | . | .     | .     | .     | .     | .                           |
| 0. | NA         | .  | . | .     | .     | .     | .     | .                           |
| 0. | NA         | .  | . | .     | .     | .     | .     | .                           |
| 0. | NA         | .  | . | .     | .     | .     | .     | .                           |
| 0. | NA         | .  | . | SIGN. | PRO.  | PID   | BIO.  | .                           |
| 0. | NA         | .  | . | .     | .     | .     | .     | .                           |
| 0. | NA         | .  | . | .     | .     | .     | .     | .                           |
| 0. | NA         | .  | . | .     | .     | .     | .     | .                           |
| 0  | Arthrogryp | NA | . | .     | .     | .     | .     | .                           |
| 0. | NA         | .  | . | CYT   | STRI. | .     | .     | REACTOME_STRIATED_MUSCLE_C  |
| 0. | NA         | .  | . | MUL   | INTR  | CAR.  | .     | REACTOME_HYALURONAN_UPTAK   |
| 0. | NA         | .  | . | DNA   | NUC   | DAM   | KEGC. | REACTOME_BASE_EXCISION_REP/ |
| 0. | NA         | .  | . | .     | .     | .     | .     | .                           |
| 0  | Porokeratc | NA | . | .     | .     | .     | .     | .                           |
| 0. | NA         | .  | . | .     | .     | .     | .     | .                           |
| 0. | NA         | .  | . | .     | .     | .     | .     | REACTOME_DNA_REPAIR         |
| 0. | NA         | .  | . | .     | .     | .     | .     | .                           |
| 0. | NA         | .  | . | .     | .     | .     | .     | .                           |

|                |    |   |                 |          |       |                             |
|----------------|----|---|-----------------|----------|-------|-----------------------------|
| 0 .            | NA | . | SIGN CYT(CACIE. | .        | .     | .                           |
| 0 .            | NA | . | .               | .        | .     | .                           |
| 0 Transpositi  | NA | . | .               | .        | .     | REACTOME_DEVELOPMENTAL_BIC  |
| 0 Spermatog    | NA | . | SYS' CELIOXIE   | KEGC.    | BIO   | REACTOME_LATENT_INFECTION_C |
| 0 .            | NA | . | PRO.            | PHO      | KEGC  | PID.                        |
| 0 .            | NA | . | .               | .        | .     | .                           |
| 0 .            | NA | . | .               | .        | .     | REACTOME_METABOLISM_OF_PRC  |
| 0 .            | NA | . | .               | .        | .     | .                           |
| 0 .            | NA | . | .               | ORGRNA.  | .     | REACTOME_INTERFERON_GAMMA   |
| 0 .            | NA | . | SIGN INTRCATI   | KEGC.    | .     | .                           |
| 0 .            | NA | . | .               | .        | .     | .                           |
| 0 .            | NA | . | M_P             | ORG PRO. | PID.  | REACTOME_CELL_CYCLE;REACTO  |
| 0 .            | NA | . | MITC            | ORG.     | .     | REACTOME_CELL_CYCLE;REACTO  |
| 0 .            | NA | . | .               | .        | .     | REACTOME_MEMBRANE_TRAFFICI  |
| 0 .            | NA | . | .               | .        | .     | .                           |
| 0 .            | NA | . | .               | .        | KEGC  | PID.                        |
| 0 .            | NA | . | .               | .        | .     | .                           |
| 0 .            | NA | . | .               | .        | .     | .                           |
| 0 .            | NA | . | .               | .        | .     | .                           |
| 0 .            | NA | . | .               | .        | .     | .                           |
| 0 .            | NA | . | .               | .        | .     | .                           |
| 0 .            | NA | . | .               | .        | .     | .                           |
| 0 .            | NA | . | .               | .        | .     | .                           |
| 0 .            | NA | . | .               | .        | .     | .                           |
| 0 .            | NA | . | .               | .        | .     | .                           |
| 0 .            | NA | . | .               | .        | .     | .                           |
| 0 .            | NA | . | .               | .        | KEGC. | REACTOME_O_LINKED_GLYCOSYL  |
| 0 .            | NA | . | MITC.           | .        | .     | .                           |
| 0 .            | NA | . | .               | .        | .     | .                           |
| 0 .            | NA | . | .               | .        | .     | REACTOME_SIGNALING_BY_FGFR_ |
| 0 .            | NA | . | .               | .        | .     | .                           |
| 0 Muscular d   | NA | . | MUS PRO.        | KEGC.    | .     | .                           |
| 0 .            | NA | . | MAC.            | KEGC.    | BIO.  | .                           |
| 0 Keratosis li | NA | . | .               | .        | KEGC. | .                           |
| 0 .            | NA | . | .               | .        | .     | .                           |
| 0 .            | NA | . | DNA ORG         | HYD      | KEGC  | PID.                        |
| 0 .            | NA | . | .               | .        | .     | REACTOME_CELL_CYCLE;REACTO  |
| 0 .            | NA | . | .               | .        | .     | .                           |
| 0 Pulmonary    | NA | . | .               | .        | KEGC  | PID.                        |
| 0 .            | NA | . | BIO             | CYT(C    | TRAI. | .                           |
| 0 .            | NA | . | .               | .        | .     | .                           |
| 0 .            | NA | . | .               | .        | .     | .                           |
| 0 .            | NA | . | .               | .        | .     | .                           |
| 0 .            | NA | . | .               | .        | .     | .                           |
| 0 .            | NA | . | .               | .        | .     | .                           |
| 0 .            | NA | . | .               | .        | .     | .                           |
| 0 .            | NA | . | .               | .        | .     | .                           |
| 0 .            | NA | . | .               | .        | PID.  | .                           |
| 0 .            | NA | . | .               | .        | .     | .                           |
| 0 .            | NA | . | .               | CYT(C    | .     | .                           |
| 0 .            | NA | . | .               | .        | .     | .                           |
| 0 .            | NA | . | EST             | INTR.    | .     | .                           |
| 0 Propionica   | NA | . | .               | .        | LIGA  | KEGC.                       |
| 0 .            | NA | . | .               | .        | .     | REACTOME_MITOCHONDRIAL_FAT  |
| 0 .            | NA | . | .               | .        | .     | .                           |
| 0 .            | NA | . | SYS' NUC        | ACTI.    | .     | .                           |

|   |             |    |   |               |             |                            |             |                             |
|---|-------------|----|---|---------------|-------------|----------------------------|-------------|-----------------------------|
| 0 | Angiopathy  | NA | . | .             | .           | .                          | KEG(PID.BIO | REACTOME_DEVELOPMENTAL_BIC  |
| 0 | .           | NA | . | .             | .           | .                          | KEGC.       | REACTOME_MITOCHONDRIAL_TRN  |
| 0 | .           | NA | . | .             | .           | .                          | .           | .                           |
| 0 | .           | NA | . | .             | .           | .                          | .           | .                           |
| 0 | .           | NA | . | .             | .           | .                          | .           | .                           |
| 0 | .           | NA | . | .             | .           | .                          | PID.        | .                           |
| 0 | .           | NA | . | SIGN.         | REC.        | .                          | .           | .                           |
| 0 | .           | NA | . | .             | .           | .                          | .           | .                           |
| 0 | .           | NA | . | .             | .           | .                          | .           | .                           |
| 0 | .           | NA | . | .             | .           | .                          | .           | .                           |
| 0 | .           | NA | . | .             | .           | .                          | .           | .                           |
| 0 | .           | NA | . | DNA ORG       | NUC.        | .                          | BIO.        | .                           |
| 0 | .           | NA | . | .             | .           | .                          | .           | .                           |
| 0 | .           | NA | . | RNA.          | TRAI.       | .                          | .           | REACTOME_RNA_POL_II_TRANSCF |
| 0 | .           | NA | . | .             | .           | .                          | .           | .                           |
| 0 | Lysinuric p | NA | . | EST/INTR.     | .           | .                          | .           | REACTOME_CELL_SURFACE_INTEI |
| 0 | .           | NA | . | .             | .           | .                          | .           | .                           |
| 0 | .           | NA | . | .             | .           | .                          | .           | .                           |
| 0 | .           | NA | . | .             | .           | .                          | .           | .                           |
| 0 | .           | NA | . | .             | .           | .                          | .           | .                           |
| 0 | .           | NA | . | .             | .           | .                          | .           | .                           |
| 0 | .           | NA | . | .             | .           | .                          | .           | .                           |
| 0 | .           | NA | . | .             | .           | .                          | .           | .                           |
| 0 | .           | NA | . | .             | .           | .                          | .           | .                           |
| 0 | Fanconi ar  | NA | . | .             | .           | .                          | PID.        | REACTOME_FANCONI_ANEMIA_PA  |
| 0 | .           | NA | . | .             | .           | .                          | .           | .                           |
| 0 | .           | NA | . | .             | .           | .                          | .           | .                           |
| 0 | {Asthma, a  | NA | . | SIGN INTR     | RHO         | KEGC.                      | .           | REACTOME_SIGNALING_BY_GPCR  |
| 0 | .           | NA | . | .             | .           | .                          | .           | .                           |
| 0 | .           | NA | . | .             | .           | .                          | KEG(PID.    | .                           |
| 0 | .           | NA | . | .             | .           | .                          | KEG(PID.    | .                           |
| 0 | .           | NA | . | .             | .           | .                          | .           | .                           |
| 0 | .           | NA | . | .             | .           | .                          | .           | .                           |
| 0 | .           | NA | . | .             | .           | .                          | .           | .                           |
| 0 | .           | NA | . | .             | .           | .                          | .           | .                           |
| 0 | .           | NA | . | CYT(LIGA      | KEGC.       | .                          | .           | REACTOME_METABOLISM_OF_VIT/ |
| 0 | .           | NA | . | .             | .           | .                          | .           | .                           |
| 0 | Molybdenu   | NA | . | .             | .           | .                          | BIO         | REACTOME_METABOLISM_OF_VIT/ |
| 0 | Bleeding d  | NA | . | FOC ADH INTE  | KEG(PID.BIO | REACTOME_CELL_CELL_COMMUNI |             |                             |
| 0 | .           | NA | . | .             | .           | .                          | .           | .                           |
| 0 | .           | NA | . | .             | .           | .                          | .           | .                           |
| 0 | .           | NA | . | .             | .           | .                          | .           | .                           |
| 0 | Glaucoma    | NA | . | EST/PRO.      | .           | .                          | .           | .                           |
| 0 | .           | NA | . | .             | .           | .                          | .           | .                           |
| 0 | .           | NA | . | .             | .           | .                          | .           | .                           |
| 0 | .           | NA | . | .             | .           | .                          | .           | .                           |
| 0 | Spinoceret  | NA | . | .             | .           | .                          | .           | REACTOME_DOUBLE_STRAND_BR   |
| 0 | .           | NA | . | .             | .           | .                          | .           | .                           |
| 0 | .           | NA | . | .             | .           | .                          | .           | .                           |
| 0 | .           | NA | . | SIGN INTR.    | .           | .                          | .           | REACTOME_GASTRIN_CREB_SIGN  |
| 0 | Hydroceph   | NA | . | REG INSC PRO. | .           | .                          | .           | .                           |
| 0 | .           | NA | . | .             | .           | .                          | .           | .                           |
| 0 | .           | NA | . | .             | .           | .                          | .           | REACTOME_INTERFERON_ALPHA_  |

|   |              |    |   |       |       |          |                             |
|---|--------------|----|---|-------|-------|----------|-----------------------------|
| 0 | Goiter, mu   | NA | . | MAC.  | HYD.  | PID.     | REACTOME_MICRORNA_MIRNA_BI  |
| 0 | .            | NA | . | .     | .     | .        | .                           |
| 0 | .            | NA | . | .     | .     | .        | .                           |
| 0 | .            | NA | . | MUL   | EXTI. | PID.     | REACTOME_ACTIVATED_NOTCH1_  |
| 0 | .            | NA | . | .     | .     | .        | .                           |
| 0 | .            | NA | . | .     | .     | .        | .                           |
| 0 | .            | NA | . | .     | .     | .        | .                           |
| 0 | .            | NA | . | BIOF  | CELI  | NUC.     | .                           |
| 0 | .            | NA | . | .     | .     | .        | .                           |
| 0 | .            | NA | . | .     | .     | .        | REACTOME_MHC_CLASS_II_ANTIG |
| 0 | .            | NA | . | .     | .     | .        | .                           |
| 0 | .            | NA | . | CELI. | REC.  | .        | .                           |
| 0 | Breast can   | NA | . | REG   | MEM   | PHO      | KEG(PID, BIO                |
| 0 | .            | NA | . | .     | .     | .        | REACTOME_SIGNALLING_BY_NGF; |
| 0 | .            | NA | . | SYS   | INTR  | REC      | KEG(PID.                    |
| 0 | .            | NA | . | RNA.  | .     | .        | REACTOME_ACTIVATED_NOTCH1_  |
| 0 | .            | NA | . | .     | .     | .        | REACTOME_RNA_POL_III_TRANSC |
| 0 | .            | NA | . | .     | .     | .        | .                           |
| 0 | .            | NA | . | .     | .     | .        | .                           |
| 0 | .            | NA | . | .     | .     | .        | .                           |
| 0 | .            | NA | . | .     | .     | .        | .                           |
| 0 | .            | NA | . | .     | .     | .        | .                           |
| 0 | .            | NA | . | .     | .     | .        | .                           |
| 0 | .            | NA | . | SYS   | CYT   | RAS      | KEG(C.                      |
| 0 | .            | NA | . | .     | .     | .        | .                           |
| 0 | .            | NA | . | .     | .     | .        | .                           |
| 0 | .            | NA | . | .     | .     | .        | .                           |
| 0 | .            | NA | . | .     | .     | .        | .                           |
| 0 | .            | NA | . | .     | .     | .        | .                           |
| 0 | .            | NA | . | .     | .     | .        | .                           |
| 0 | .            | NA | . | .     | .     | .        | .                           |
| 0 | .            | NA | . | .     | .     | .        | .                           |
| 0 | .            | NA | . | .     | .     | .        | .                           |
| 0 | .            | NA | . | .     | .     | .        | .                           |
| 0 | .            | NA | . | .     | .     | .        | .                           |
| 0 | .            | NA | . | .     | .     | .        | .                           |
| 0 | .            | NA | . | .     | .     | .        | .                           |
| 0 | .            | NA | . | .     | .     | .        | .                           |
| 0 | .            | NA | . | .     | .     | .        | .                           |
| 0 | .            | NA | . | .     | .     | .        | .                           |
| 0 | .            | NA | . | .     | .     | .        | .                           |
| 0 | .            | NA | . | .     | .     | .        | .                           |
| 0 | [Skin/hair/ε | NA | . | .     | .     | KEG(C.   | REACTOME_IMMUNE_SYSTEM;REA  |
| 0 | [Skin/hair/ε | NA | . | .     | .     | KEG(C.   | REACTOME_IMMUNE_SYSTEM;REA  |
| 0 | .            | NA | . | .     | .     | .        | .                           |
| 0 | .            | NA | . | .     | .     | .        | .                           |
| 0 | .            | NA | . | .     | .     | .        | .                           |
| 0 | .            | NA | . | .     | .     | .        | REACTOME_TRANSMISSION_ACRC  |
| 0 | .            | NA | . | .     | .     | .        | .                           |
| 0 | .            | NA | . | .     | .     | .        | .                           |
| 0 | .            | NA | . | .     | .     | .        | .                           |
| 0 | .            | NA | . | EST). | CATI  | KEG(C.   | .                           |
| 0 | .            | NA | . | .     | .     | .        | .                           |
| 0 | .            | NA | . | .     | .     | KEG(C.   | BIO                         |
| 0 | Platelet PL  | NA | . | REG.  | LIPA  | KEG(PID. | REACTOME_DEVELOPMENTAL_BIC  |
| 0 | .            | NA | . | .     | .     | .        | REACTOME_GASTRIN_CREB_SIGN  |
| 0 | .            | NA | . | .     | .     | .        | REACTOME_DEVELOPMENTAL_BIC  |
| 0 | .            | NA | . | .     | .     | .        | REACTOME_DEVELOPMENTAL_BIC  |
| 0 | Spinoceret   | NA | . | .     | .     | .        | .                           |
| 0 | .            | NA | . | ORG.  | .     | .        | .                           |
| 0 | .            | NA | . | .     | .     | KEG(C.   | REACTOME_METABOLISM_OF_AMI  |
| 0 | Deafness,    | NA | . | .     | .     | .        | .                           |



|                |    |   |                    |       |       |          |                             |   |
|----------------|----|---|--------------------|-------|-------|----------|-----------------------------|---|
| 0 .            | NA | . | .                  | .     | .     | .        | .                           | . |
| 0 ?Cataract,   | NA | . | SEN.               | .     | KEGC. | .        | .                           | . |
| 0 .            | NA | . | SIGN.              | .     | .     | .        | .                           | . |
| 0 .            | NA | . | .                  | .     | KEGC. | .        | REACTOME_DEVELOPMENTAL_BIC  |   |
| 0 Acromicric   | NA | . | SYS' PRO CATI.     | .     | PID.  | .        | REACTOME_INTEGRIN_CELL_SURF |   |
| 0 Acromicric   | NA | . | CM0 SYS' PRO CATI. | .     | PID.  | .        | REACTOME_INTEGRIN_CELL_SURF |   |
| 0 .            | NA | . | .                  | .     | .     | .        | .                           | . |
| 0 .            | NA | . | .                  | .     | .     | .        | .                           | . |
| 0 .            | NA | . | .                  | .     | .     | .        | REACTOME_TRANSMEMBRANE_TF   |   |
| 0 .            | NA | . | .                  | .     | .     | .        | .                           | . |
| 0 .            | NA | . | .                  | .     | .     | .        | .                           | . |
| 0 .            | NA | . | .                  | .     | .     | .        | .                           | . |
| 0 Griscelli sy | NA | . | .                  | CYT(. | .     | .        | REACTOME_DIABETES_PATHWAYS  |   |
| 0 .            | NA | . | EST/ INTRACTI.     | .     | .     | .        | REACTOME_TRANSMEMBRANE_TF   |   |
| 0 .            | NA | . | MAC.               | .     | KEGC. | .        | .                           | . |
| 0 Combined     | NA | . | .                  | .     | KEGC. | .        | .                           | . |
| 0 .            | NA | . | .                  | .     | .     | .        | .                           | . |
| 0 .            | NA | . | .                  | .     | .     | .        | .                           | . |
| 0 .            | NA | . | .                  | .     | .     | .        | .                           | . |
| 0 .            | NA | . | .                  | .     | .     | .        | .                           | . |
| 0 .            | NA | . | .                  | .     | .     | .        | .                           | . |
| 0 .            | NA | . | .                  | .     | .     | .        | .                           | . |
| 0 Ceroid lipo  | NA | . | REG ORG PRO.       | .     | .     | .        | .                           | . |
| 0 .            | NA | . | MUS INTR COL       | KEGC  | PID.  | .        | REACTOME_INTEGRIN_CELL_SURF |   |
| 0 .            | NA | . | .                  | .     | .     | .        | .                           | . |
| 0 .            | NA | . | .                  | .     | .     | .        | .                           | . |
| 0 .            | NA | . | .                  | .     | .     | .        | .                           | . |
| 0 .            | NA | . | .                  | .     | .     | .        | .                           | . |
| 0 .            | NA | . | .                  | .     | .     | .        | .                           | . |
| 0 Bardet-Bie   | NA | . | CEN ORG MICF.      | .     | .     | .        | .                           | . |
| 0 Adrenal ins  | NA | . | BIOE.              | OXY   | KEGC. | .        | REACTOME_METABOLISM_OF_STE  |   |
| 0 .            | NA | . | .                  | .     | .     | .        | .                           | . |
| 0 .            | NA | . | .                  | .     | .     | .        | .                           | . |
| 0 .            | NA | . | .                  | .     | .     | .        | .                           | . |
| 0 .            | NA | . | .                  | .     | .     | .        | .                           | . |
| 0 .            | NA | . | .                  | .     | .     | .        | .                           | . |
| 0 .            | NA | . | .                  | .     | .     | .        | .                           | . |
| 0 .            | NA | . | .                  | .     | .     | .        | .                           | . |
| 0 .            | NA | . | .                  | .     | .     | .        | .                           | . |
| 0 .            | NA | . | .                  | .     | .     | .        | .                           | . |
| 0 Tyrosinemi   | NA | . | CAR.               | .     | KEGC. | .        | REACTOME_METABOLISM_OF_AMI  |   |
| 0 .            | NA | . | .                  | .     | .     | .        | .                           | . |
| 0 .            | NA | . | .                  | .     | .     | .        | .                           | . |
| 0 .            | NA | . | .                  | .     | .     | .        | .                           | . |
| 0 .            | NA | . | .                  | .     | .     | .        | .                           | . |
| 0 .            | NA | . | .                  | CELI. | .     | PID. BIO | REACTOME_SIGNALING_BY_RHO_  |   |
| 0 .            | NA | . | .                  | CYT(. | .     | .        | .                           | . |
| 0 Mitochondi   | NA | . | DNA CYT(NUC.       | .     | .     | .        | .                           | . |
| 0 .            | NA | . | REG INTR CATI.     | .     | .     | .        | REACTOME_TRANSMEMBRANE_TF   |   |
| 0 Acrocallos;  | NA | . | .                  | .     | .     | .        | .                           | . |
| 0 Acrocallos;  | NA | . | .                  | .     | .     | .        | .                           | . |
| 0 .            | NA | . | .                  | .     | .     | .        | .                           | . |
| 0 .            | NA | . | .                  | .     | .     | .        | .                           | . |
| 0 Weill-Marc   | NA | . | .                  | .     | .     | .        | .                           | . |
| 0 .            | NA | . | .                  | .     | .     | .        | .                           | . |
| 0 .            | NA | . | .                  | .     | .     | .        | .                           | . |
| 0 .            | NA | . | CELI.              | SER . | .     | .        | REACTOME_SIGNALLING_BY_NGF; |   |
| 0 .            | NA | . | .                  | .     | KEGC. | .        | .                           | . |
| 0 .            | NA | . | .                  | .     | .     | .        | .                           | . |





|                |    |   |                |       |          |          |                             |
|----------------|----|---|----------------|-------|----------|----------|-----------------------------|
| 0 .            | NA | . | .              | .     | .        | .        | REACTOME_METABOLISM_OF_NOI  |
| 0 Hyperalph    | NA | . | REG EXTILIPIL. | .     | .        | .        | REACTOME_HDL_MEDIATED_LIPID |
| 0 .            | NA | . | .              | .     | .        | .        | .                           |
| 0 .            | NA | . | .              | .     | .        | .        | .                           |
| 0 .            | NA | . | .              | .     | .        | .        | .                           |
| 0 .            | NA | . | MAC.           | .     | .        | .        | .                           |
| 0 .            | NA | . | .              | .     | .        | .        | .                           |
| 0 .            | NA | . | .              | .     | .        | .        | .                           |
| 0 .            | NA | . | .              | .     | .        | .        | .                           |
| 0 .            | NA | . | .              | .     | .        | .        | .                           |
| 0 .            | NA | . | INTRCATI.      | .     | .        | .        | REACTOME_TRANSMEMBRANE_TF   |
| 0 .            | NA | . | .              | .     | .        | .        | .                           |
| 0 .            | NA | . | .              | .     | .        | .        | .                           |
| 0 .            | NA | . | .              | .     | .        | .        | .                           |
| 0 .            | NA | . | RNA NUC CATI.  | .     | .        | .        | .                           |
| 0 .            | NA | . | PRO EXTI.      | .     | .        | .        | .                           |
| 0 .            | NA | . | REG INTRCATI.  | .     | .        | .        | REACTOME_TRANSMEMBRANE_TF   |
| 0 .            | NA | . | .              | .     | .        | .        | .                           |
| 0 .            | NA | . | DNA ORG SINC.  | PID.  | .        | .        | REACTOME_MEIOSIS;REACTOME_I |
| 0 .            | NA | . | .              | .     | .        | .        | .                           |
| 0 .            | NA | . | .              | .     | .        | .        | .                           |
| 0 .            | NA | . | .              | .     | .        | .        | .                           |
| 0 .            | NA | . | .              | .     | .        | .        | .                           |
| 0 .            | NA | . | .              | .     | .        | .        | .                           |
| 0 .            | NA | . | REG ADH KINA   | KEGC  | PID.BIO  | .        | REACTOME_INTEGRIN_CELL_SURF |
| 0 .            | NA | . | .              | .     | .        | .        | .                           |
| 0 .            | NA | . | .              | .     | .        | .        | .                           |
| 0 Autoinflam   | NA | . | .              | .     | KEGC     | PID.     | REACTOME_ANTIGEN_ACTIVATES  |
| 0 Malonyl-Cc   | NA | . | COF CYT(LYA    | KEGC. | .        | .        | .                           |
| 0 .            | NA | . | .              | .     | .        | .        | .                           |
| 0 .            | NA | . | RNA.           | RNA.  | .        | .        | REACTOME_RNA_POL_I_TRANSCR  |
| 0 .            | NA | . | .              | .     | .        | .        | .                           |
| 0 Lymphedei    | NA | . | SYS' NUC TRAI. | .     | .        | .        | .                           |
| 0 .            | NA | . | .              | .     | .        | .        | .                           |
| 0 Huntington   | NA | . | .              | .     | .        | .        | .                           |
| 0 Brittle corn | NA | . | .              | .     | .        | .        | .                           |
| 0 .            | NA | . | .              | .     | LYA      | KEGC.    | REACTOME_METABOLISM_OF_LIPI |
| 0 .            | NA | . | CELI.          | .     | PID.     | .        | .                           |
| 0 .            | NA | . | INTE.          | PHO.  | .        | .        | .                           |
| 0 .            | NA | . | .              | .     | .        | .        | .                           |
| 0 .            | NA | . | .              | .     | .        | .        | .                           |
| 0 Glomerulo:   | NA | . | ORG.           | .     | .        | .        | .                           |
| 0 Retinitis pi | NA | . | RNA ORG RNA    | KEGC. | .        | .        | REACTOME_PROCESSING_OF_CAI  |
| 0 .            | NA | . | .              | .     | .        | .        | .                           |
| 0 .            | NA | . | RNA.           | TRAI. | PID.BIO. | .        | .                           |
| 0 .            | NA | . | DNA ORG TELC.  | PID.  | .        | .        | REACTOME_METABOLISM_OF_MRI  |
| 0 .            | NA | . | DNA ORG TELC.  | PID.  | .        | .        | REACTOME_METABOLISM_OF_MRI  |
| 0 .            | NA | . | RNA.           | TRAI. | .        | .        | .                           |
| 0 .            | NA | . | .              | .     | .        | .        | .                           |
| 0 .            | NA | . | .              | .     | KEGC.    | BIO      | REACTOME_TRANSMISSION_ACRC  |
| 0 .            | NA | . | ORG.           | .     | .        | .        | .                           |
| 0 .            | NA | . | BIOF.          | .     | KEGC.    | BIO      | REACTOME_IMMUNE_SYSTEM;REA  |
| 0 .            | NA | . | .              | .     | .        | PID.BIO. | .                           |

|               |           |              |          |      |      |                            |                             |                             |
|---------------|-----------|--------------|----------|------|------|----------------------------|-----------------------------|-----------------------------|
| 0.            | NA        | EST/CYT      |          |      |      |                            |                             |                             |
| 0.            | NA        |              |          |      |      |                            |                             |                             |
| 0.            | NA        |              |          |      |      |                            |                             |                             |
| 0.            | NA        |              |          |      |      |                            |                             |                             |
| 0.            | NA        |              |          |      |      | REACTOME_TRANSMEMBRANE_TF  |                             |                             |
| 0.            | NA        | MEM/CAR      |          |      |      |                            |                             |                             |
| 0.            | NA        |              |          |      |      |                            |                             |                             |
| 0.            | NA        | NUC          | KEGC     | BIO  |      | REACTOME_MICRORNA_MIRNA_BI |                             |                             |
| 0.            | NA        |              |          |      |      |                            |                             |                             |
| 0.            | NA        |              |          | PID  |      | REACTOME_PHOSPHOLIPID_META |                             |                             |
| 0.            | NA        | NEG          | TRAI     |      |      |                            |                             |                             |
| 0.            | NA        | GAMORG       |          |      |      |                            |                             |                             |
| 0.            | NA        | GAMORG       |          |      |      |                            |                             |                             |
| 0.            | NA        | SULIINTRSULI | KEGC     |      |      | REACTOME_HS_GAG_BIOSYNTHES |                             |                             |
| 0.            | NA        |              |          |      |      |                            |                             |                             |
| 0.            | NA        |              |          |      |      |                            |                             |                             |
| 0.            | NA        | RNA          | TRAI     | PID  | BIO  | REACTOME_DEVELOPMENTAL_BIC |                             |                             |
| 0.            | NA        | RNA          | TRAI     | PID  | BIO  | REACTOME_DEVELOPMENTAL_BIC |                             |                             |
| 0.            | NA        |              |          |      |      |                            |                             |                             |
| 0.            | NA        |              |          |      |      |                            |                             |                             |
| 0             | Deafness, | SEN          |          |      |      |                            |                             |                             |
| 0             | Deafness, | SEN          |          |      |      |                            |                             |                             |
| 0.            | NA        |              |          |      |      |                            |                             |                             |
| 0.            | NA        |              |          |      |      |                            |                             |                             |
| 0.            | NA        |              |          |      |      |                            |                             |                             |
| 0.            | NA        |              |          |      |      |                            |                             |                             |
| 0.            | NA        | RNA          | PHO      | KEGC | PID  | BIO                        | REACTOME_TRIF_MEDIATED_TLR3 |                             |
| 0 {Hypertens  | NA        | MUL          | CYT      | OXIE | KEGC | PID                        | BIO                         | REACTOME_LATENT_INFECTION_C |
| 0.            | NA        |              | INTRCATI |      |      |                            |                             | REACTOME_TRANSMEMBRANE_TF   |
| 0.            | NA        |              | INTRCATI |      |      |                            |                             | REACTOME_TRANSMEMBRANE_TF   |
| 0.            | NA        |              |          |      |      |                            |                             |                             |
| 0.            | NA        |              |          |      |      |                            |                             |                             |
| 0.            | NA        |              |          |      |      |                            |                             |                             |
| 0.            | NA        |              |          |      |      |                            |                             |                             |
| 0.            | NA        |              |          |      |      |                            |                             |                             |
| 0.            | NA        | CELI         |          |      |      |                            |                             | REACTOME_SIGNALING_BY_FGFR  |
| 0 {Anxiety-re | NA        | REG          | INTRACTI |      |      |                            |                             |                             |
| 0.            | NA        |              |          |      |      |                            |                             |                             |
| 0.            | NA        |              |          |      | KEGC |                            |                             |                             |
| 0.            | NA        |              |          |      |      |                            |                             |                             |
| 0.            | NA        |              |          |      |      |                            |                             |                             |
| 0.            | NA        |              |          |      |      |                            |                             |                             |
| 0.            | NA        |              |          |      |      |                            |                             |                             |
| 0.            | NA        |              | NUC      |      |      |                            |                             |                             |
| 0.            | NA        |              |          |      |      |                            |                             |                             |
| 0.            | NA        |              |          |      | KEGC |                            |                             | REACTOME_SIGNALLING_BY_NGF; |
| 0.            | NA        |              |          |      |      |                            |                             |                             |
| 0.            | NA        |              |          |      |      |                            |                             |                             |
| 0.            | NA        |              |          |      |      |                            |                             |                             |
| 0.            | NA        |              | TRAI     |      |      |                            |                             |                             |
| 0.            | NA        |              |          |      |      |                            |                             |                             |
| 0.            | NA        |              | MEM      | CATI | KEGC |                            |                             | REACTOME_DEVELOPMENTAL_BIC  |
| 0.            | NA        | BIO          | STR      | KEGC |      |                            |                             | REACTOME_TRANSLATION;REACTI |
| 0.            | NA        |              |          |      |      |                            |                             |                             |

|               |    |   |                             |                                |
|---------------|----|---|-----------------------------|--------------------------------|
| 0 Adenocarc   | NA | . | SYS` EXTIPHO KEG(PID.       | REACTOME_DEVELOPMENTAL_BIC     |
| 0 .           | NA | . | REG INTR. KEGC.             | BIO REACTOME_SIGNALING_BY_GPCR |
| 0 .           | NA | . | SYS` . . . . .              |                                |
| 0 .           | NA | . | MEI(ORG . . . . .           |                                |
| 0 .           | NA | . | . CYT( . . . . .            |                                |
| 0 .           | NA | . | . CYT( . . . . .            |                                |
| 0 Hyper-IgE   | NA | . | RNA CYT(REC KEG(PID.BIO     | REACTOME_SIGNALLING_BY_NGF;    |
| 0 Hyper-IgE   | NA | . | RNA CYT(REC KEG(PID.BIO     | REACTOME_SIGNALLING_BY_NGF;    |
| 0 Hyper-IgE   | NA | . | RNA CYT(REC KEG(PID.BIO     | REACTOME_SIGNALLING_BY_NGF;    |
| 0 .           | NA | . | COF . PHO KEGC . . .        | REACTOME_VITAMIN_B5_PANTOTH    |
| 0 Pseudohyr   | NA | . | EST/CELI NUC . . . . .      |                                |
| 0 .           | NA | . | . . . . .                   |                                |
| 0 .           | NA | . | . . . . .                   |                                |
| 0 .           | NA | . | . . . . .                   |                                |
| 0 .           | NA | . | . . . . .                   |                                |
| 0 .           | NA | . | SIG INTR PHO . . . . .      |                                |
| 0 .           | NA | . | SIG INTR PHO . . . . .      |                                |
| 0 .           | NA | . | SIG INTR PHO . . . . .      |                                |
| 0 .           | NA | . | . . . . .                   |                                |
| 0 .           | NA | . | . . . . .                   |                                |
| 0 .           | NA | . | . . . . .                   |                                |
| 0 .           | NA | . | . . . . .                   |                                |
| 0 .           | NA | . | . . . . .                   |                                |
| 0 .           | NA | . | . . . . .                   |                                |
| 0 Osteopetrc  | NA | . | . . . . .                   |                                |
| 0 .           | NA | . | . . . . .                   |                                |
| 0 .           | NA | . | . . . . .                   |                                |
| 0 .           | NA | . | . . . . . KEGC . . .        | REACTOME_TRANSMISSION_ACRC     |
| 0 .           | NA | . | . . . . .                   |                                |
| 0 .           | NA | . | . CYT(EXO . . . . .         | REACTOME_IMMUNE_SYSTEM;REA     |
| 0 .           | NA | . | . . . . .                   |                                |
| 0 .           | NA | . | BIOFLAM . . . . .           |                                |
| 0 .           | NA | . | . . . . .                   |                                |
| 0 .           | NA | . | . . . . .                   |                                |
| 0 .           | NA | . | . . . . .                   |                                |
| 0 .           | NA | . | REG NUC . . . . .           |                                |
| 0 .           | NA | . | REG NUC . . . . .           |                                |
| 0 Caffey dise | NA | . | SYS` . . . . . KEG(PID .    | REACTOME_DEVELOPMENTAL_BIC     |
| 0 {Pseudoxa   | NA | . | . . . . . KEGC . . . .      |                                |
| 0 .           | NA | . | GAMCYT( . . . . .           |                                |
| 0 .           | NA | . | RNA NUC DOU . . . . .       |                                |
| 0 Fanconi ar  | NA | . | DNA NUC DNA KEGC . . .      | REACTOME_MEIOSIS;REACTOME_I    |
| 0 Breast can  | NA | . | BIOF NUC PHO KEG(PID . .    |                                |
| 0 Growth hoi  | NA | . | EST). . . . . HEM KEGC . .  | BIO REACTOME_GROWTH_HORMONE_   |
| 0 Hyperkaler  | NA | . | EST). . . . . CATI . . . .  | REACTOME_DEVELOPMENTAL_BIC     |
| 0 .           | NA | . | . . . . .                   |                                |
| 0 .           | NA | . | . . . . .                   |                                |
| 0 .           | NA | . | . . . . . KEGC . . .        | REACTOME_ABCA_TRANSPORTER      |
| 0 .           | NA | . | . . . . .                   |                                |
| 0 .           | NA | . | . . . . .                   |                                |
| 0 .           | NA | . | BIO(CYT(ELE(. . . . . PID . |                                |
| 0 .           | NA | . | . . . . .                   |                                |
| 0 .           | NA | . | . . . . .                   |                                |
| 0 .           | NA | . | . CYT( . . . . .            |                                |
| 0 .           | NA | . | . CYT( . . . . .            |                                |
| 0 .           | NA | . | . . . . .                   |                                |
| 0 .           | NA | . | DNA . . . . .               |                                |
| 0 .           | NA | . | DNA . . . . .               |                                |

|                 |    |   |                 |                |                            |                             |   |   |
|-----------------|----|---|-----------------|----------------|----------------------------|-----------------------------|---|---|
| 0 .             | NA | . | RES .           | OXIE .         | .                          | .                           | . | . |
| 0 .             | NA | . | .               | .              | .                          | .                           | . | . |
| 0 .             | NA | . | .               | .              | KEGC .                     | .                           | . | . |
| 0 .             | NA | . | .               | CYT(           | .                          | .                           | . | . |
| 0 .             | NA | . | .               | .              | .                          | .                           | . | . |
| 0 .             | NA | . | .               | .              | .                          | .                           | . | . |
| 0 .             | NA | . | .               | .              | .                          | .                           | . | . |
| 0 .             | NA | . | CELI NUC TRAI . | PID .          | .                          | .                           | . | . |
| 0 Ciliary dyst  | NA | . | .               | .              | .                          | .                           | . | . |
| 0 Pityriasis ri | NA | . | POS CYT(        | PRO .          | .                          | .                           | . | . |
| 0 Pityriasis ri | NA | . | POS CYT(        | PRO .          | .                          | .                           | . | . |
| 0 {Moyamoy      | NA | . | .               | .              | .                          | .                           | . | . |
| 0 .             | NA | . | .               | .              | KEGC(PID .                 | REACTOME_INSULIN_RECEPTOR_  | . | . |
| 0 .             | NA | . | SYS` MEM MOL    | KEGC(PID.BIO . | .                          | .                           | . | . |
| 0 .             | NA | . | .               | .              | .                          | .                           | . | . |
| 0 .             | NA | . | .               | .              | .                          | .                           | . | . |
| 0 .             | NA | . | .               | .              | .                          | .                           | . | . |
| 0 .             | NA | . | .               | .              | .                          | .                           | . | . |
| 0 .             | NA | . | .               | .              | .                          | .                           | . | . |
| 0 Alveolar sc   | NA | . | .               | .              | .                          | .                           | . | . |
| 0 .             | NA | . | .               | .              | KEGC(PID.BIO               | REACTOME_VITAMIN_B5_PANTOTH | . | . |
| 0 .             | NA | . | .               | .              | KEGC(PID.BIO               | REACTOME_VITAMIN_B5_PANTOTH | . | . |
| 0 .             | NA | . | .               | .              | .                          | .                           | . | . |
| 0 .             | NA | . | .               | .              | .                          | .                           | . | . |
| 0 Seborrhea     | NA | . | .               | .              | .                          | .                           | . | . |
| 0 .             | NA | . | MUL CELI NEU .  | .              | .                          | REACTOME_SIGNALLING_BY_NGF; | . | . |
| 0 .             | NA | . | M_PI ORG .      | PID .          | .                          | REACTOME_CELL_CYCLE;REACTO  | . | . |
| 0 Ataxia, sp    | NA | . | CYT(UNFI .      | .              | .                          | .                           | . | . |
| 0 .             | NA | . | .               | .              | .                          | REACTOME_CELL_CYCLE;REACTO  | . | . |
| 0 Glucocortic   | NA | . | SIGN INTR NEU   | KEGC .         | .                          | REACTOME_SIGNALING_BY_GPCR  | . | . |
| 0 .             | NA | . | .               | .              | .                          | .                           | . | . |
| 0 .             | NA | . | .               | .              | .                          | .                           | . | . |
| 0 .             | NA | . | .               | .              | .                          | .                           | . | . |
| 0 .             | NA | . | .               | .              | .                          | .                           | . | . |
| 0 .             | NA | . | .               | .              | .                          | .                           | . | . |
| 0 Cardiomyo     | NA | . | SYS` PRO .      | KEGC(PID.BIO   | REACTOME_CELL_CELL_COMMUNI | .                           | . | . |
| 0 .             | NA | . | .               | .              | .                          | .                           | . | . |
| 0 .             | NA | . | RNA NUC DNA .   | .              | .                          | .                           | . | . |
| 0 Vici syndro   | NA | . | .               | .              | .                          | .                           | . | . |
| 0 .             | NA | . | .               | .              | .                          | .                           | . | . |
| 0 .             | NA | . | .               | .              | .                          | .                           | . | . |
| 0 Microvillus   | NA | . | .               | .              | .                          | REACTOME_TRANSMEMBRANE_TF   | . | . |
| 0 .             | NA | . | .               | .              | .                          | .                           | . | . |
| 0 .             | NA | . | .               | .              | .                          | .                           | . | . |
| 0 .             | NA | . | .               | CYT(           | .                          | .                           | . | . |
| 0 .             | NA | . | .               | PRO .          | .                          | .                           | . | . |
| 0 .             | NA | . | .               | .              | .                          | .                           | . | . |
| 0 Polymicrog    | NA | . | .               | .              | .                          | .                           | . | . |
| 0 .             | NA | . | .               | .              | .                          | .                           | . | . |
| 0 .             | NA | . | .               | .              | .                          | REACTOME_TRANSMEMBRANE_TF   | . | . |
| 0 .             | NA | . | .               | .              | .                          | .                           | . | . |
| 0 [Blood gro    | NA | . | SIGN .          | PID .          | .                          | REACTOME_PYRUVATE_METABOLI  | . | . |
| 0 .             | NA | . | RNA CYT(NUC .   | .              | .                          | REACTOME_TRANSCRIPTION;REAC | . | . |
| 0 .             | NA | . | RNA CYT(NUC .   | .              | .                          | REACTOME_TRANSCRIPTION;REAC | . | . |

|    |             |    |   |                          |       |                   |   |                             |
|----|-------------|----|---|--------------------------|-------|-------------------|---|-----------------------------|
| 0. | NA          | .  | . | INTR.                    | .     | .                 | . | .                           |
| 0. | NA          | .  | . | RNA NUC RNA.             | .     | .                 | . | REACTOME_PROCESSING_OF_CAI  |
| 0. | NA          | .  | . | .                        | .     | .                 | . | .                           |
| 0. | NA          | .  | . | .                        | .     | .                 | . | REACTOME_SIGNALING_BY_RHO_  |
| 0. | NA          | .  | . | RNA NUC NUC KEGC.        | .     | .                 | . | REACTOME_RNA_POL_III_TRANSC |
| 0. | NA          | .  | . | MEM CYT(OXIE) KEGC.      | .     | .                 | . | .                           |
| 0. | NA          | .  | . | .                        | .     | .                 | . | .                           |
| 0. | NA          | .  | . | .                        | .     | .                 | . | .                           |
| 0. | NA          | .  | . | .                        | .     | .                 | . | .                           |
| 0. | NA          | .  | . | .                        | .     | .                 | . | .                           |
| 0. | NA          | .  | . | RES.                     | RNA.  | .                 | . | .                           |
| 0. | NA          | .  | . | GAM.                     | RNA.  | .                 | . | .                           |
| 0. | NA          | .  | . | GAM.                     | RNA.  | .                 | . | .                           |
| 0. | NA          | .  | . | .                        | .     | .                 | . | .                           |
| 0. | NA          | .  | . | .                        | .     | KEGC.             | . | .                           |
| 0. | NA          | .  | . | .                        | .     | .                 | . | .                           |
| 0. | NA          | .  | . | CYT.                     | .     | .                 | . | .                           |
| 0. | NA          | .  | . | CYT.                     | .     | .                 | . | .                           |
| 0. | NA          | .  | . | REG INTR LIPII KEGC(PID. | .     | .                 | . | REACTOME_SIGNALING_BY_GPCR  |
| 0. | NA          | .  | . | RNA.                     | TRAI. | PID.              | . | .                           |
| 0. | NA          | .  | . | .                        | .     | .                 | . | .                           |
| 0. | NA          | .  | . | .                        | .     | .                 | . | .                           |
| 0  | Leukemia,   | NA | . | SYS.                     | .     | KEGC(PID.         | . | .                           |
| 0. | NA          | .  | . | .                        | .     | .                 | . | .                           |
| 0. | NA          | .  | . | .                        | .     | KEGC.             | . | .                           |
| 0. | NA          | .  | . | .                        | .     | .                 | . | .                           |
| 0. | NA          | .  | . | ORG NUC DOU.             | .     | PID.              | . | .                           |
| 0. | NA          | .  | . | .                        | .     | .                 | . | .                           |
| 0. | NA          | .  | . | .                        | .     | .                 | . | .                           |
| 0. | NA          | .  | . | .                        | .     | TRAI KEGC(PID.BIO | . | REACTOME_SIGNALING_BY_RHO_  |
| 0. | NA          | .  | . | .                        | .     | PID.BIO           | . | REACTOME_SIGNALING_BY_RHO_  |
| 0  | Spastic pai | NA | . | .                        | .     | .                 | . | .                           |
| 0. | NA          | .  | . | DNA.                     | .     | KEGC.             | . | REACTOME_TRANSCRIPTION_COU  |
| 0. | NA          | .  | . | DNA.                     | .     | KEGC.             | . | REACTOME_TRANSCRIPTION_COU  |
| 0  | Hemophag    | NA | . | .                        | .     | .                 | . | .                           |
| 0  | {Dengue fe  | NA | . | MUL.                     | CAR.  | .                 | . | .                           |
| 0  | {Dengue fe  | NA | . | MUL.                     | CAR.  | .                 | . | .                           |
| 0. | NA          | .  | . | .                        | .     | .                 | . | .                           |
| 0. | NA          | .  | . | .                        | .     | .                 | . | .                           |
| 0  | Methylmak   | NA | . | CYT.                     | .     | .                 | . | .                           |
| 0. | NA          | .  | . | .                        | .     | .                 | . | .                           |
| 0. | NA          | .  | . | .                        | .     | .                 | . | .                           |
| 0. | NA          | .  | . | .                        | .     | .                 | . | .                           |
| 0. | NA          | .  | . | .                        | .     | .                 | . | .                           |
| 0. | NA          | .  | . | MEM.                     | .     | .                 | . | REACTOME_O_LINKED_GLYCOSYL  |
| 0. | NA          | .  | . | MEM.                     | .     | .                 | . | REACTOME_O_LINKED_GLYCOSYL  |
| 0. | NA          | .  | . | MEM.                     | .     | .                 | . | REACTOME_O_LINKED_GLYCOSYL  |
| 0. | NA          | .  | . | .                        | .     | .                 | . | .                           |
| 0. | NA          | .  | . | M_PI NUC.                | .     | KEGC(PID.BIO      | . | REACTOME_ANTIVIRAL_MECHANIS |
| 0. | NA          | .  | . | .                        | .     | .                 | . | .                           |
| 0. | NA          | .  | . | .                        | .     | .                 | . | .                           |
| 0. | NA          | .  | . | RNA NUC.                 | .     | .                 | . | .                           |



|               |    |   |       |       |       |       |                            |                                 |
|---------------|----|---|-------|-------|-------|-------|----------------------------|---------------------------------|
| 0 .           | NA | . | G_PI  | INTR  | REC   | KEGC. | .                          | REACTOME_GASTRIN_CREB_SIGN      |
| 0 {Malaria, c | NA | . | .     | INTR  | REC   | KEGC  | PID                        | BIO REACTOME_IMMUNOREGULATORY   |
| 0 .           | NA | . | .     | INTR. | .     | .     | .                          | .                               |
| 0 Tyrosine ki | NA | . | BIOF. | PHO   | KEGC  | PID   | BIO                        | REACTOME_SIGNALING_BY_ILS;RE    |
| 0 .           | NA | . | SIGN  | INSC  | HYD   | KEGC. | .                          | .                               |
| 0 .           | NA | . | EST,  | ORG   | MICf  | KEGC. | .                          | .                               |
| 0 .           | NA | . | .     | .     | .     | .     | .                          | .                               |
| 0 Hyperchole  | NA | . | GLY   | INTR  | LIPO  | KEGC. | .                          | REACTOME_METABOLISM_OF_LIPI     |
| 0 Hyperchole  | NA | . | GLY   | INTR  | LIPO  | KEGC. | .                          | REACTOME_METABOLISM_OF_LIPI     |
| 0 Adams-Oli   | NA | . | .     | .     | .     | .     | PID.                       | REACTOME_FACTORS_INVOLVED_      |
| 0 .           | NA | . | .     | .     | .     | .     | .                          | .                               |
| 0 .           | NA | . | REG.  | .     | .     | .     | .                          | .                               |
| 0 Mannosido   | NA | . | GLY   | .     | HYD   | KEGC. | .                          | .                               |
| 0 .           | NA | . | .     | .     | .     | .     | .                          | .                               |
| 0 .           | NA | . | IMMI. | RNA.  | .     | .     | .                          | .                               |
| 0 .           | NA | . | .     | .     | .     | KEGC  | PID                        | BIO REACTOME_SIGNALLING_BY_NGF; |
| 0 .           | NA | . | .     | .     | .     | .     | .                          | .                               |
| 0 .           | NA | . | .     | .     | .     | KEGC. | .                          | REACTOME_SIGNALING_BY_GPCR      |
| 0 .           | NA | . | .     | .     | .     | .     | .                          | .                               |
| 0 .           | NA | . | .     | .     | .     | .     | .                          | REACTOME_SIGNALING_BY_EGFR      |
| 0 .           | NA | . | .     | .     | .     | .     | .                          | .                               |
| 0 {Celiac dis | NA | . | EST,  | ORG   | HYD.  | .     | PID.                       | REACTOME_SIGNALING_BY_RHO_      |
| 0 .           | NA | . | .     | .     | .     | .     | .                          | .                               |
| 0 .           | NA | . | .     | .     | PRO.  | .     | .                          | .                               |
| 0 .           | NA | . | .     | .     | .     | .     | .                          | .                               |
| 0 .           | NA | . | .     | .     | .     | .     | .                          | .                               |
| 0 .           | NA | . | .     | .     | .     | .     | .                          | .                               |
| 0 .           | NA | . | .     | .     | HYD   | KEGC. | .                          | REACTOME_SIGNALING_BY_GPCR      |
| 0 .           | NA | . | DNA   | ORG   | HYD.  | .     | .                          | .                               |
| 0 .           | NA | . | .     | .     | .     | .     | .                          | .                               |
| 0 .           | NA | . | .     | .     | .     | .     | .                          | .                               |
| 0 .           | NA | . | .     | .     | .     | .     | .                          | REACTOME_GENERIC_TRANSCRIP      |
| 0 .           | NA | . | .     | .     | .     | .     | .                          | .                               |
| 0 .           | NA | . | .     | .     | .     | .     | .                          | .                               |
| 0 .           | NA | . | .     | .     | .     | .     | .                          | .                               |
| 0 Hemolytic ; | NA | . | REG.  | .     | KEGC. | BIO   | REACTOME_GLYCOLYSIS;REACTO |                                 |
| 0 .           | NA | . | IMMI  | INTR. | KEGC  | PID.  | .                          | .                               |
| 0 .           | NA | . | .     | .     | .     | .     | .                          | .                               |
| 0 Microceph   | NA | . | .     | .     | .     | .     | .                          | .                               |
| 0 .           | NA | . | RNA   | NUC   | CAR.  | .     | .                          | .                               |
| 0 .           | NA | . | .     | .     | .     | .     | .                          | REACTOME_GENERIC_TRANSCRIP      |
| 0 .           | NA | . | .     | .     | .     | .     | .                          | .                               |
| 0 .           | NA | . | .     | .     | .     | .     | .                          | .                               |
| 0 .           | NA | . | .     | .     | .     | .     | .                          | .                               |
| 0 .           | NA | . | .     | .     | .     | .     | .                          | .                               |
| 0 .           | NA | . | REG   | MEM   | LIPI  | KEGC  | PID.                       | .                               |
| 0 Central cor | NA | . | EST,  | INTR  | CATI  | KEGC. | .                          | .                               |
| 0 Central cor | NA | . | EST,  | INTR  | CATI  | KEGC. | .                          | .                               |
| 0 .           | NA | . | SYS.  | NUC   | KEGC  | PID   | BIO.                       | .                               |

|               |    |   |   |                  |         |                            |                             |       |                             |
|---------------|----|---|---|------------------|---------|----------------------------|-----------------------------|-------|-----------------------------|
| 0 .           | NA | . | . | NUC RNA .        | .       | .                          | REACTOME_PROCESSING_OF_CAF  |       |                             |
| 0 .           | NA | . | . | MUS ORGCATI .    | PID .   | .                          |                             |       |                             |
| 0 .           | NA | . | . | .                | .       | .                          |                             |       |                             |
| 0 .           | NA | . | . | .                | .       | .                          |                             |       |                             |
| 0 Cold-induc  | NA | . | . | MUL .            | .       | .                          |                             |       |                             |
| 0 .           | NA | . | . | RNA NUC TRAI .   | .       | BIO .                      |                             |       |                             |
| 0 .           | NA | . | . | .                | .       | .                          |                             |       |                             |
| 0 .           | NA | . | . | .                | .       | .                          |                             |       |                             |
| 0 .           | NA | . | . | .                | .       | .                          |                             |       |                             |
| 0 .           | NA | . | . | .                | .       | .                          |                             |       |                             |
| 0 Cutis laxa, | NA | . | . | REG PRO CATI .   | .       | .                          |                             |       |                             |
| 0 Cutis laxa, | NA | . | . | REG PRO CATI .   | .       | .                          |                             |       |                             |
| 0 .           | NA | . | . | SYS .            | .       | KEGC .                     |                             |       |                             |
| 0 .           | NA | . | . | .                | .       | .                          |                             |       |                             |
| 0 .           | NA | . | . | RNA ORGRNA .     | .       | .                          | REACTOME_PROCESSING_OF_CAF  |       |                             |
| 0 Camurati-E  | NA | . | . | REG PRO TRAIKEGC | PID BIO | REACTOME_DEVELOPMENTAL_BIC |                             |       |                             |
| 0 .           | NA | . | . | CELI MEM RAS     | KEGC    | PID BIO                    | REACTOME_SIGNALLING_BY_NGF; |       |                             |
| 0 Carpenter   | NA | . | . | .                | .       | .                          |                             |       |                             |
| 0 .           | NA | . | . | IMMI INTR .      | .       | .                          |                             |       |                             |
| 0 .           | NA | . | . | MUL .            | .       | .                          |                             |       |                             |
| 0 .           | NA | . | . | .                | .       | .                          |                             |       |                             |
| 0 .           | NA | . | . | .                | .       | .                          |                             |       |                             |
| 0 .           | NA | . | . | .                | .       | .                          |                             |       |                             |
| 0 .           | NA | . | . | TRAI .           | .       | .                          | REACTOME_GENERIC_TRANSCRIP  |       |                             |
| 0 .           | NA | . | . | .                | .       | .                          | REACTOME_GENERIC_TRANSCRIP  |       |                             |
| 0 .           | NA | . | . | .                | .       | .                          |                             |       |                             |
| 0 .           | NA | . | . | .                | .       | .                          |                             |       |                             |
| 0 Deafness,   | NA | . | . | .                | .       | .                          |                             |       |                             |
| 0 Leukemia/I  | NA | . | . | POS CYT          | PRO .   | PID .                      |                             |       |                             |
| 0 [Blood grot | NA | . | . | SIGN INTR        | REC .   | .                          |                             |       |                             |
| 0 .           | NA | . | . | .                | .       | KEGC .                     | REACTOME_MITOCHONDRIAL_PRC  |       |                             |
| 0 .           | NA | . | . | SIGN INTR .      | .       | .                          | REACTOME_GASTRIN_CREB_SIGN  |       |                             |
| 0 .           | NA | . | . | .                | .       | .                          |                             |       |                             |
| 0 .           | NA | . | . | SIGN CYT         | STRI .  | .                          |                             |       |                             |
| 0 .           | NA | . | . | .                | .       | KEGC .                     | REACTOME_TRANSMEMBRANE_TF   |       |                             |
| 0 Cone-rod r  | NA | . | . | SYS .            | .       | .                          |                             |       |                             |
| 0 .           | NA | . | . | .                | .       | .                          |                             |       |                             |
| 0 .           | NA | . | . | .                | .       | .                          |                             |       |                             |
| 0 .           | NA | . | . | .                | .       | CYT .                      | KEGC                        | PID . | REACTOME_SPHINGOLIPID_DE_NC |
| 0 .           | NA | . | . | .                | .       | .                          |                             |       |                             |
| 0 .           | NA | . | . | RNA ORGRNA       | KEGC .  | .                          | REACTOME_PROCESSING_OF_CAF  |       |                             |
| 0 .           | NA | . | . | RNA ORGRNA       | KEGC .  | .                          | REACTOME_PROCESSING_OF_CAF  |       |                             |
| 0 .           | NA | . | . | ANA EXTI .       | .       | .                          |                             |       |                             |
| 0 .           | NA | . | . | .                | .       | .                          |                             |       |                             |
| 0 .           | NA | . | . | .                | .       | .                          |                             |       |                             |
| 0 .           | NA | . | . | .                | .       | KEGC                       | PID .                       |       |                             |
| 0 Deafness,   | NA | . | . | .                | .       | KEGC .                     | REACTOME_DEVELOPMENTAL_BIC  |       |                             |
| 0 .           | NA | . | . | NEG CYT .        | .       | PID .                      | REACTOME_GENERIC_TRANSCRIP  |       |                             |
| 0 Mandibulai  | NA | . | . | DNA NUC NUC      | KEGC .  | .                          | REACTOME_BASE_EXCISION_REP/ |       |                             |
| 0 Mandibulai  | NA | . | . | DNA NUC NUC      | KEGC .  | .                          | REACTOME_BASE_EXCISION_REP/ |       |                             |
| 0 Mandibulai  | NA | . | . | DNA NUC NUC      | KEGC .  | .                          | REACTOME_BASE_EXCISION_REP/ |       |                             |
| 0 .           | NA | . | . | .                | .       | .                          |                             |       |                             |
| 0 .           | NA | . | . | .                | .       | STRI .                     | REACTOME_STRIATED_MUSCLE_C  |       |                             |
| 0 .           | NA | . | . | .                | .       | STRI .                     | REACTOME_STRIATED_MUSCLE_C  |       |                             |

|    |              |    |                |              |              |                             |                             |
|----|--------------|----|----------------|--------------|--------------|-----------------------------|-----------------------------|
| 0. | NA           | .  | SIGN INTR.     | .            | .            | .                           | .                           |
| 0. | NA           | .  | .              | .            | .            | .                           | .                           |
| 0. | NA           | .  | .              | .            | .            | .                           | .                           |
| 0. | NA           | .  | .              | .            | .            | .                           | .                           |
| 0. | NA           | .  | .              | .            | .            | .                           | .                           |
| 0. | NA           | .  | .              | .            | KEGC.        | .                           | REACTOME_TRANSMISSION_ACRC  |
| 0  | Retinitis pi | NA | .              | RNA NUC RIBC | KEGC.        | .                           | .                           |
| 0. | NA           | .  | .              | .            | .            | .                           | .                           |
| 0. | NA           | .  | SIGN INTR REC  | KEGC.        | .            | .                           | REACTOME_IMMUNOREGULATORY   |
| 0. | NA           | .  | .              | INTR.        | .            | .                           | .                           |
| 0. | NA           | .  | .              | .            | .            | .                           | .                           |
| 0. | NA           | .  | CELI.          | .            | .            | .                           | REACTOME_INTEGRATION_OF_EN  |
| 0. | NA           | .  | .              | .            | .            | .                           | .                           |
| 0. | NA           | .  | .              | .            | .            | .                           | .                           |
| 0. | NA           | .  | .              | .            | .            | .                           | REACTOME_GENERIC_TRANSCRIP  |
| 0. | NA           | .  | .              | .            | .            | .                           | REACTOME_GENERIC_TRANSCRIP  |
| 0. | NA           | .  | .              | .            | .            | .                           | REACTOME_GENERIC_TRANSCRIP  |
| 0. | NA           | .  | .              | .            | .            | .                           | .                           |
| 0. | NA           | .  | .              | EXTI.        | .            | .                           | .                           |
| 0. | NA           | .  | .              | MEM.         | .            | .                           | REACTOME_CELL_CELL_COMMUNI  |
| 0  | Spinoceret   | NA | .              | .            | .            | .                           | .                           |
| 0  | Spinoceret   | NA | .              | RNA ORGRNA.  | .            | .                           | REACTOME_ASSOCIATION_OF_TRI |
| 0. | NA           | .  | .              | .            | .            | .                           | .                           |
| 0. | NA           | .  | .              | .            | .            | .                           | REACTOME_DEVELOPMENTAL_BIC  |
| 0. | NA           | .  | .              | .            | .            | .                           | .                           |
| 0. | NA           | .  | .              | .            | .            | .                           | .                           |
| 0. | NA           | .  | .              | .            | .            | .                           | .                           |
| 0. | NA           | .  | .              | .            | .            | .                           | .                           |
| 0. | NA           | .  | .              | NUC.         | .            | .                           | .                           |
| 0. | NA           | .  | .              | .            | .            | .                           | .                           |
| 0. | NA           | .  | .              | .            | .            | .                           | .                           |
| 0  | Polyneurof   | NA | .              | .            | .            | .                           | .                           |
| 0. | NA           | .  | .              | .            | .            | .                           | .                           |
| 0. | NA           | .  | .              | .            | .            | .                           | .                           |
| 0. | NA           | .  | .              | .            | .            | .                           | .                           |
| 0. | NA           | .  | .              | .            | .            | .                           | .                           |
| 0. | NA           | .  | .              | CYTI.        | .            | .                           | .                           |
| 0. | NA           | .  | .              | .            | .            | .                           | .                           |
| 0. | NA           | .  | PHO ORGLIPII   | KEGC.        | .            | .                           | REACTOME_METABOLISM_OF_PRC  |
| 0. | NA           | .  | EST/ORG PRO.   | .            | .            | .                           | .                           |
| 0. | NA           | .  | CEN ORGKINA.   | .            | .            | .                           | REACTOME_CELL_CYCLE;REACTO  |
| 0. | NA           | .  | BIOF ORG PRO.  | .            | .            | .                           | REACTOME_METABOLISM_OF_VIT/ |
| 0. | NA           | .  | .              | NUC.         | .            | .                           | .                           |
| 0  | Mental retz  | NA | .              | .            | .            | KEGC(PID.                   | REACTOME_TRANSMISSION_ACRC  |
| 0. | NA           | .  | .              | .            | .            | .                           | .                           |
| 0. | NA           | .  | .              | CYTI.        | .            | .                           | .                           |
| 0. | NA           | .  | .              | .            | .            | .                           | .                           |
| 0. | NA           | .  | .              | .            | .            | .                           | .                           |
| 0. | NA           | .  | .              | .            | .            | .                           | .                           |
| 0. | NA           | .  | .              | .            | .            | .                           | .                           |
| 0  | DNA topois   | NA | .              | RES NUC CHR. | PID.         | .                           | .                           |
| 0. | NA           | .  | .              | CYTI.        | KEGC(PID.BIO | REACTOME_SIGNALLING_BY_NGF; |                             |
| 0. | NA           | .  | ENZ' INTR PRO. | .            | .            | .                           | .                           |

|    |            |    |                           |                             |                             |                             |
|----|------------|----|---------------------------|-----------------------------|-----------------------------|-----------------------------|
| 0. | NA         | .  | ENZ' INTR PRO.            | .                           | .                           | .                           |
| 0. | NA         | .  | SIGN' CELI.               | .                           | .                           | .                           |
| 0. | NA         | .  | MUL' EXTI.                | .                           | .                           | .                           |
| 0. | NA         | .  | .                         | .                           | .                           | REACTOME_TRANSMEMBRANE_TF   |
| 0. | NA         | .  | .                         | .                           | PID.                        | .                           |
| 0. | NA         | .  | .                         | .                           | .                           | REACTOME_TRANSMEMBRANE_TF   |
| 0. | NA         | .  | .                         | .                           | .                           | .                           |
| 0. | NA         | .  | .                         | .                           | .                           | REACTOME_NEURONAL_SYSTEM;F  |
| 0. | NA         | .  | .                         | .                           | .                           | REACTOME_TRANSMEMBRANE_TF   |
| 0. | NA         | .  | .                         | .                           | .                           | .                           |
| 0. | NA         | .  | TRAI.                     | .                           | .                           | .                           |
| 0. | NA         | .  | .                         | .                           | .                           | .                           |
| 0  | ACTH-inde  | NA | REG EXTIHYD KEGC.         | BIO                         | REACTOME_SIGNALING_BY_GPCR  |                             |
| 0  | ACTH-inde  | NA | REG EXTIHYD KEGC.         | BIO                         | REACTOME_SIGNALING_BY_GPCR  |                             |
| 0. | NA         | .  | .                         | .                           | .                           | REACTOME_MEIOSIS;REACTOME_I |
| 0. | NA         | .  | .                         | .                           | .                           | .                           |
| 0  | Epiphyseal | NA | PRO.                      | PID.                        | REACTOME_DEVELOPMENTAL_BIC  |                             |
| 0  | Epiphyseal | NA | PRO.                      | PID.                        | REACTOME_DEVELOPMENTAL_BIC  |                             |
| 0. | NA         | .  | .                         | KEG(PID,BIO                 | REACTOME_COPI_MEDIATED_TRAI |                             |
| 0. | NA         | .  | .                         | .                           | .                           | .                           |
| 0. | NA         | .  | .                         | .                           | .                           | .                           |
| 0. | NA         | .  | .                         | .                           | .                           | .                           |
| 0. | NA         | .  | .                         | .                           | .                           | .                           |
| 0. | NA         | .  | .                         | .                           | .                           | .                           |
| 0. | NA         | .  | .                         | .                           | .                           | .                           |
| 0. | NA         | .  | .                         | .                           | .                           | .                           |
| 0. | NA         | .  | .                         | .                           | .                           | .                           |
| 0. | NA         | .  | .                         | .                           | .                           | .                           |
| 0. | NA         | .  | .                         | .                           | .                           | .                           |
| 0. | NA         | .  | BIOF INTR PRO.            | .                           | .                           | .                           |
| 0. | NA         | .  | BIOF INTR PRO.            | .                           | .                           | .                           |
| 0. | NA         | .  | .                         | .                           | .                           | .                           |
| 0. | NA         | .  | .                         | .                           | .                           | .                           |
| 0. | NA         | .  | .                         | .                           | .                           | .                           |
| 0. | NA         | .  | .                         | .                           | .                           | .                           |
| 0. | NA         | .  | .                         | .                           | .                           | .                           |
| 0. | NA         | .  | .                         | .                           | .                           | .                           |
| 0. | NA         | .  | .                         | .                           | .                           | .                           |
| 0. | NA         | .  | .                         | .                           | .                           | .                           |
| 0. | NA         | .  | CELI INTR.                | KEGC.                       | .                           | .                           |
| 0. | NA         | .  | .                         | KEG(PID.                    | REACTOME_CELL_SURFACE_INTEI |                             |
| 0  | Alzheimer  | NA | REG INTR PRO KEGC(PID,BIO | REACTOME_TRIF_MEDIATED_TLR3 |                             |                             |
| 0. | NA         | .  | .                         | .                           | .                           | .                           |
| 0. | NA         | .  | .                         | .                           | .                           | .                           |
| 0. | NA         | .  | SIGN.                     | PHO.                        | .                           | .                           |
| 0. | NA         | .  | SIGN.                     | PHO.                        | .                           | .                           |
| 0. | NA         | .  | EST).                     | PHO KEGC(PID,BIO            | REACTOME_PHOSPHOLIPID_META  |                             |
| 0. | NA         | .  | .                         | .                           | .                           | .                           |
| 0. | NA         | .  | RES INTR REC KEGC(PID,BIO | REACTOME_INTERFERON_ALPHA_  |                             |                             |
| 0. | NA         | .  | EST).                     | .                           | PID.                        | REACTOME_SIGNALING_BY_RHO_I |
| 0. | NA         | .  | .                         | .                           | .                           | .                           |
| 0. | NA         | .  | .                         | .                           | .                           | .                           |
| 0. | NA         | .  | .                         | .                           | .                           | .                           |
| 0. | NA         | .  | INTR.                     | .                           | .                           | .                           |
| 0. | NA         | .  | NUC.                      | .                           | .                           | .                           |

|               |    |   |               |           |                             |                                |   |
|---------------|----|---|---------------|-----------|-----------------------------|--------------------------------|---|
| 0 .           | NA | . | .             | .         | KEGC.                       | .                              | . |
| 0 .           | NA | . | SYS INTR.     | .         | PID.                        | REACTOME_CELL_CELL_COMMUNI     |   |
| 0 .           | NA | . | SYS INTR.     | .         | PID.                        | REACTOME_CELL_CELL_COMMUNI     |   |
| 0 .           | NA | . | SYS INTR.     | .         | PID.                        | REACTOME_CELL_CELL_COMMUNI     |   |
| 0 .           | NA | . | SYS INTR.     | .         | PID.                        | REACTOME_CELL_CELL_COMMUNI     |   |
| 0 .           | NA | . | EST).         | .         | .                           | .                              |   |
| 0 .           | NA | . | .             | .         | PID.                        | .                              |   |
| 0 .           | NA | . | CYT).         | .         | .                           | .                              |   |
| 0 .           | NA | . | .             | .         | .                           | .                              |   |
| 0 .           | NA | . | .             | .         | .                           | .                              |   |
| 0 .           | NA | . | RNA NUC.      | KEGC.     | .                           | REACTOME_PROCESSING_OF_CAF     |   |
| 0 .           | NA | . | ORG.          | .         | .                           | .                              |   |
| 0 .           | NA | . | SIGN.         | .         | .                           | .                              |   |
| 0 .           | NA | . | EST,INTRCATI. | .         | .                           | .                              |   |
| 0 Leukocyte   | NA | . | BIOF.         | KINA      | KEGC(PID,BIO                | REACTOME_IMMUNOREGULATORY      |   |
| 0 .           | NA | . | EST,INTRCOF.  | .         | .                           | REACTOME_METABOLISM_OF_VIT,    |   |
| 0 Bethlem m   | NA | . | .             | .         | KEGC(PID.                   | REACTOME_DEVELOPMENTAL_BIC     |   |
| 0 Glutamate   | NA | . | COF           | CYT).     | KEGC.                       | REACTOME_METABOLISM_OF_AMI     |   |
| 0 .           | NA | . | .             | .         | .                           | .                              |   |
| 0 Microceph   | NA | . | ANA.          | .         | .                           | BIO REACTOME_CELL_CYCLE;REACTO |   |
| 0 .           | NA | . | .             | .         | .                           | .                              |   |
| 0 .           | NA | . | .             | .         | .                           | .                              |   |
| 0 .           | NA | . | .             | .         | .                           | .                              |   |
| 0 .           | NA | . | .             | .         | .                           | .                              |   |
| 0 .           | NA | . | .             | .         | .                           | .                              |   |
| 0 .           | NA | . | .             | .         | .                           | .                              |   |
| 0 DiGeorge :  | NA | . | SYS.          | .         | .                           | .                              |   |
| 0 DiGeorge :  | NA | . | SYS.          | .         | .                           | .                              |   |
| 0 .           | NA | . | .             | .         | .                           | .                              |   |
| 0 .           | NA | . | .             | .         | .                           | .                              |   |
| 0 .           | NA | . | .             | .         | .                           | .                              |   |
| 0 .           | NA | . | PHO ORG       | PHO       | KEGC(PID.                   | REACTOME_SYNTHESIS_OF_PIPS_    |   |
| 0 .           | NA | . | NUC PRO.      | .         | .                           | .                              |   |
| 0 .           | NA | . | .             | .         | .                           | .                              |   |
| 0 .           | NA | . | .             | .         | .                           | .                              |   |
| 0 Mental retz | NA | . | DNA NUC.      | .         | PID.                        | .                              |   |
| 0 .           | NA | . | .             | .         | .                           | .                              |   |
| 0 .           | NA | . | REG INTR.     | KEGC(PID. | REACTOME_SIGNALLING_BY_NGF; |                                |   |
| 0 Beta-ureid  | NA | . | .             | HYD       | KEGC.                       | REACTOME_PYRIMIDINE_CATABOL    |   |
| 0 Glutathioni | NA | . | CAR.          | .         | KEGC.                       | REACTOME_BIOLOGICAL_OXIDATI    |   |
| 0 .           | NA | . | .             | .         | .                           | .                              |   |
| 0 .           | NA | . | .             | .         | .                           | .                              |   |
| 0 .           | NA | . | .             | .         | .                           | .                              |   |
| 0 .           | NA | . | .             | .         | .                           | .                              |   |
| 0 .           | NA | . | .             | .         | .                           | .                              |   |
| 0 .           | NA | . | MUS NON ACTI. | .         | .                           | .                              |   |
| 0 .           | NA | . | .             | .         | .                           | .                              |   |
| 0 .           | NA | . | .             | .         | .                           | .                              |   |
| 0 .           | NA | . | .             | .         | .                           | .                              |   |
| 0 Muscular d  | NA | . | REG ORG       | TRAI.     | .                           | .                              |   |
| 0 .           | NA | . | DNA NUC.      | KEGC.     | BIO                         | REACTOME_ACTIVATION_OF_THE_    |   |
| 0 Deafness,   | NA | . | REG ORG       | HYD       | KEGC.                       | REACTOME_DEVELOPMENTAL_BIC     |   |
| 0 Surfactant  | NA | . | RES INTR      | INTE      | KEGC(PID,BIO                | REACTOME_SIGNALING_BY_ILS;RE   |   |

|                |    |                 |       |       |       |                                |   |
|----------------|----|-----------------|-------|-------|-------|--------------------------------|---|
| 0 .            | NA | .               | .     | .     | .     | .                              | . |
| 0 Infantile ne | NA | CM1 MEM.        | LIPA  | KEGC. | .     | REACTOME_ACYL_CHAIN_REMODE     |   |
| 0 .            | NA | RNA             | .     | .     | .     | BIO REACTOME_FACTORS_INVOLVED_ |   |
| 0 .            | NA | .               | .     | .     | .     | .                              |   |
| 0 .            | NA | EST/INTRCATI.   | .     | .     | .     | REACTOME_TRANSMISSION_ACRC     |   |
| 0 .            | NA | EST/INTRCATI.   | .     | .     | .     | REACTOME_TRANSMISSION_ACRC     |   |
| 0 .            | NA | SIGN.           | GTP.  | .     | .     | .                              |   |
| 0 .            | NA | RNA ORGCATI.    | .     | .     | .     | .                              |   |
| 0 .            | NA | SIGN.           | .     | KEGC. | .     | REACTOME_DEVELOPMENTAL_BIC     |   |
| 0 .            | NA | .               | .     | .     | .     | REACTOME_PRE_NOTCH_TRANSC      |   |
| 0 .            | NA | REG INTR NEU    | KEGC. | .     | .     | REACTOME_GASTRIN_CREB_SIGN     |   |
| 0 .            | NA | RNA NUC NUC     | KEGC. | .     | .     | REACTOME_RNA_POL_III_TRANSC    |   |
| 0 .            | NA | RNA NUC NUC     | KEGC. | .     | .     | REACTOME_RNA_POL_III_TRANSC    |   |
| 0 .            | NA | .               | .     | .     | .     | REACTOME_CELL_CYCLE;REACTO     |   |
| 0 .            | NA | .               | .     | .     | .     | .                              |   |
| 0 .            | NA | .               | .     | .     | .     | .                              |   |
| 0 .            | NA | LIPII INTR TRAI | KEGC. | .     | .     | REACTOME_PHOSPHOLIPID_META     |   |
| 0 .            | NA | .               | .     | .     | .     | .                              |   |
| 0 .            | NA | .               | .     | .     | .     | .                              |   |
| 0 .            | NA | .               | .     | .     | KEGC. | REACTOME_MEIOSIS;REACTOME_     |   |
| 0 Synpolydar   | NA | PRO STRI.       | .     | .     | .     | .                              |   |
| 0 Spinoceret   | NA | SYS' CYT(       | .     | .     | .     | .                              |   |
| 0 .            | NA | EST/ MEM.       | .     | .     | .     | .                              |   |
| 0 .            | NA | SYS' INTR.      | .     | .     | .     | .                              |   |
| 0 .            | NA | .               | .     | .     | .     | .                              |   |
| 0 .            | NA | CELI.           | NUC.  | .     | .     | .                              |   |
| 0 .            | NA | CELI.           | NUC.  | .     | .     | .                              |   |
| 0 .            | NA | .               | .     | .     | .     | REACTOME_NEURONAL_SYSTEM       |   |
| 0 .            | NA | .               | .     | .     | .     | REACTOME_NEURONAL_SYSTEM       |   |
| 0 .            | NA | .               | .     | .     | KEGC. | .                              |   |
| 0 .            | NA | .               | .     | .     | .     | .                              |   |
| 0 .            | NA | .               | .     | .     | .     | .                              |   |
| 0 .            | NA | ENZ' CYT(KINA   | KEGC. | .     | .     | .                              |   |
| 0 .            | NA | BIOΣ.           | .     | KEGC. | .     | .                              |   |
| 0 .            | NA | INTR.           | KEGC. | .     | .     | .                              |   |
| 0 Chondrody    | NA | SYS'.           | ARYI. | .     | .     | REACTOME_PTM_GAMMA_CARBO)      |   |
| 0 .            | NA | .               | .     | .     | KEGC. | .                              |   |
| 0 .            | NA | .               | .     | .     | .     | .                              |   |
| 0 .            | NA | .               | .     | .     | .     | .                              |   |
| 0 .            | NA | CELI EXTI INTE. | .     | .     | .     | .                              |   |
| 0 Cataract 4(  | NA | .               | .     | .     | .     | .                              |   |
| 0 .            | NA | .               | .     | .     | .     | .                              |   |
| 0 .            | NA | .               | .     | .     | .     | .                              |   |
| 0 Epileptic ei | NA | .               | .     | .     | .     | .                              |   |
| 0 .            | NA | .               | .     | .     | .     | .                              |   |
| 0 .            | NA | .               | .     | .     | .     | .                              |   |
| 0 Mental retz  | NA | BEH.            | .     | .     | .     | .                              |   |
| 0 .            | NA | .               | .     | .     | .     | .                              |   |
| 0 Glycerol ki  | NA | .               | .     | .     | KEGC. | REACTOME_TRIGLYCERIDE_BIOSY    |   |
| 0 Glycerol ki  | NA | .               | .     | .     | KEGC. | REACTOME_TRIGLYCERIDE_BIOSY    |   |
| 0 Becker mu    | NA | BIOΣ PRO ACTI   | KEGC. | .     | .     | BIO REACTOME_STRIATED_MUSCLE_C |   |
| 0 .            | NA | .               | .     | .     | .     | .                              |   |
| 0 .            | NA | CELI.           | .     | .     | .     | .                              |   |
| 0 .            | NA | .               | .     | .     | .     | .                              |   |







|    |              |    |                |                |                                      |
|----|--------------|----|----------------|----------------|--------------------------------------|
| 0. | NA           | .  | EST/COA.       | KEG(PID,BIO.   |                                      |
| 0. | NA           | .  | .              | .              | .                                    |
| 0. | NA           | .  | TRAI.          | PID.           | .                                    |
| 0. | NA           | .  | .              | .              | .                                    |
| 0. | NA           | .  | EST/ORG.       | .              | .                                    |
| 0. | NA           | .  | .              | KEGC.          | .                                    |
| 0. | NA           | .  | .              | .              | .                                    |
| 0. | NA           | .  | .              | .              | .                                    |
| 0  | Urofacial s  | NA | .              | HYD KEGC.      | REACTOME_HS_GAG_DEGRADATI            |
| 0. | NA           | .  | EST/ORG.       | PID.           | REACTOME_CELL_CYCLE;REACTO           |
| 0. | NA           | .  | EXTICAR        | KEGC.          | .                                    |
| 0. | NA           | .  | .              | .              | .                                    |
| 0. | NA           | .  | DNA CYT(.      | .              | .                                    |
| 0. | NA           | .  | SYS INTR REC   | KEG(PID.       | REACTOME_ACTIVATED_NOTCH1_           |
| 0. | NA           | .  | .              | .              | .                                    |
| 0. | NA           | .  | .              | .              | .                                    |
| 0. | NA           | .  | .              | .              | .                                    |
| 0. | NA           | .  | .              | .              | .                                    |
| 0. | NA           | .  | MICFORG MICF.  | PID.           | REACTOME_CELL_CYCLE;REACTO           |
| 0  | Immunode     | NA | .              | KEGC.          | .                                    |
| 0. | NA           | .  | DNA NUC PRO.   | .              | .                                    |
| 0. | NA           | .  | .              | .              | .                                    |
| 0. | NA           | .  | .              | .              | .                                    |
| 0. | NA           | .  | SIG INTR TRAI. | PID.           | .                                    |
| 0. | NA           | .  | .              | .              | .                                    |
| 0. | NA           | .  | .              | .              | .                                    |
| 0  | Becker mu    | NA | .              | BIO\$ PRO ACTI | KEGC. BIO REACTOME_STRIATED_MUSCLE_C |
| 0. | NA           | .  | .              | .              | .                                    |
| 0  | Megakaryc    | NA | .              | PID,BIO.       | .                                    |
| 0. | NA           | .  | .              | .              | .                                    |
| 0. | NA           | .  | MUL PRO INTE.  | PID.           | REACTOME_EXTRACELLULAR_MAT           |
| 0  | {Bardet-Bie  | NA | .              | .              | .                                    |
| 0. | NA           | .  | CEN ORG.       | .              | .                                    |
| 0. | NA           | .  | .              | .              | .                                    |
| 0. | NA           | .  | .              | .              | .                                    |
| 0. | NA           | .  | .              | .              | .                                    |
| 0. | NA           | .  | .              | .              | .                                    |
| 0. | NA           | .  | .              | .              | .                                    |
| 0  | Elliptocytos | NA | .              | ACTI ORG ACTI. | REACTOME_DEVELOPMENTAL_BIC           |
| 0  | [Blood grot  | NA | .              | MEM.           | REACTOME_SIGNALING_BY_GPCR           |
| 0. | NA           | .  | .              | .              | .                                    |
| 0. | NA           | .  | .              | .              | .                                    |
| 0. | NA           | .  | .              | .              | .                                    |
| 0  | Nephropati   | NA | .              | .              | .                                    |
| 0. | NA           | .  | .              | KEG(PID.       | REACTOME_SIGNALING_BY_GPCR           |
| 0. | NA           | .  | PRO.           | PRO.           | .                                    |
| 0  | Homocystil   | NA | .              | KEGC.          | REACTOME_SULFUR_AMINO_ACID           |
| 0. | NA           | .  | .              | KEGC.          | .                                    |
| 0. | NA           | .  | .              | KEGC.          | .                                    |
| 0  | Sitosterole  | NA | .              | PRO KEGC.      | REACTOME_ABCA_TRANSPORTER            |



|               |    |   |                      |                                 |                                |   |   |
|---------------|----|---|----------------------|---------------------------------|--------------------------------|---|---|
| 0.            | NA | . | .                    | .                               | .                              | . | . |
| 0.            | NA | . | .                    | PHO KEGC.                       | BIO REACTOME_GLYCOLYSIS;REACTO | . | . |
| 0.            | NA | . | .                    | .                               | .                              | . | . |
| 0.            | NA | . | .                    | .                               | .                              | . | . |
| 0.            | NA | . | .                    | .                               | .                              | . | . |
| 0.            | NA | . | .                    | .                               | .                              | . | . |
| 0.            | NA | . | REG.                 | .                               | .                              | . | . |
| 0.            | NA | . | .                    | .                               | .                              | . | . |
| 0.            | NA | . | BIOF.                | NUC.                            | PID.                           | . | . |
| 0.            | NA | . | .                    | .                               | .                              | . | . |
| 0.            | NA | . | .                    | .                               | .                              | . | . |
| 0.            | NA | . | DNA NUC.             | .                               | .                              | . | . |
| 0.            | NA | . | .                    | .                               | .                              | . | . |
| 0.            | NA | . | .                    | RNA.                            | .                              | . | . |
| 0 Deafness,   | NA | . | .                    | .                               | .                              | . | . |
| 0.            | NA | . | .                    | .                               | .                              | . | . |
| 0 Spermatog   | NA | . | SYS' CELI OXII KEGC. | BIO REACTOME_LATENT_INFECTION_C | .                              | . | . |
| 0.            | NA | . | .                    | .                               | .                              | . | . |
| 0.            | NA | . | .                    | .                               | .                              | . | . |
| 0 Fraser syn  | NA | . | .                    | .                               | .                              | . | . |
| 0 Fraser syn  | NA | . | .                    | .                               | .                              | . | . |
| 0.            | NA | . | .                    | .                               | .                              | . | . |
| 0.            | NA | . | .                    | .                               | .                              | . | . |
| 0.            | NA | . | .                    | .                               | .                              | . | . |
| 0.            | NA | . | .                    | .                               | .                              | . | . |
| 0.            | NA | . | .                    | .                               | .                              | . | . |
| 0.            | NA | . | .                    | .                               | .                              | . | . |
| 0.            | NA | . | .                    | .                               | .                              | . | . |
| 0.            | NA | . | .                    | .                               | .                              | . | . |
| 0 Breast can  | NA | . | REG MEM PHO KEGC(PID | BIO REACTOME_SIGNALLING_BY_NGF; | .                              | . | . |
| 0.            | NA | . | .                    | .                               | .                              | . | . |
| 0.            | NA | . | .                    | .                               | .                              | . | . |
| 0.            | NA | . | .                    | .                               | .                              | . | . |
| 0.            | NA | . | .                    | .                               | .                              | . | . |
| 0.            | NA | . | .                    | .                               | .                              | . | . |
| 0.            | NA | . | .                    | .                               | .                              | . | . |
| 0.            | NA | . | .                    | .                               | .                              | . | . |
| 0.            | NA | . | .                    | .                               | .                              | . | . |
| 0.            | NA | . | .                    | .                               | .                              | . | . |
| 0.            | NA | . | .                    | .                               | .                              | . | . |
| 0.            | NA | . | .                    | .                               | .                              | . | . |
| 0.            | NA | . | .                    | .                               | .                              | . | . |
| 0.            | NA | . | .                    | .                               | .                              | . | . |
| 0.            | NA | . | .                    | .                               | .                              | . | . |
| 0.            | NA | . | .                    | .                               | .                              | . | . |
| 0.            | NA | . | .                    | .                               | .                              | . | . |
| 0 Night blind | NA | . | .                    | .                               | .                              | . | . |
| 0.            | NA | . | .                    | .                               | .                              | . | . |
| 0.            | NA | . | .                    | .                               | .                              | . | . |
| 0.            | NA | . | INTR.                | .                               | .                              | . | . |
| 0.            | NA | . | .                    | .                               | .                              | . | . |
| 0.            | NA | . | .                    | .                               | .                              | . | . |



|               |    |   |               |           |      |                             |   |
|---------------|----|---|---------------|-----------|------|-----------------------------|---|
| 0 .           | NA | . | SYS INTR.     | .         | .    | .                           | . |
| 0 .           | NA | . | .             | KEGG PID. | .    | REACTOME_RNA_POL_I_TRANSCR  |   |
| 0 .           | NA | . | .             | .         | .    | .                           | . |
| 0 .           | NA | . | .             | .         | .    | .                           | . |
| 0 .           | NA | . | .             | .         | .    | REACTOME_DEVELOPMENTAL_BIC  |   |
| 0 .           | NA | . | .             | .         | .    | .                           | . |
| 0 {Colchicine | NA | . | EST/CELI NUC  | KEGG PID. | BIO  | REACTOME_ABACAVIR_TRANSPOF  |   |
| 0 .           | NA | . | .             | .         | .    | .                           | . |
| 0 Thyroid ca  | NA | . | ORG.          | .         | .    | REACTOME_CELL_CYCLE;REACTO  |   |
| 0 .           | NA | . | SIGN NON PRO  | KEGG PID. | BIO  | REACTOME_APOPTOTIC_CLEAVAC  |   |
| 0 .           | NA | . | POS .         | KEGG PID. | BIO  | REACTOME_EXTRINSIC_PATHWAY  |   |
| 0 .           | NA | . | .             | .         | .    | .                           | . |
| 0 .           | NA | . | INTR.         | KEGG PID. | .    | REACTOME_INTEGRIN_CELL_SURF |   |
| 0 .           | NA | . | .             | .         | .    | .                           | . |
| 0 .           | NA | . | .             | .         | .    | .                           | . |
| 0 .           | NA | . | .             | .         | .    | .                           | . |
| 0 .           | NA | . | .             | .         | .    | .                           | . |
| 0 .           | NA | . | ORG STRI.     | .         | .    | .                           | . |
| 0 Antley-Bixl | NA | . | CELI.         | KEGG PID. | .    | REACTOME_NEGATIVE_REGULATI  |   |
| 0 .           | NA | . | RNA NUC.      | .         | .    | .                           | . |
| 0 Deafness,   | NA | . | REG CYTO.     | .         | BIO. | .                           | . |
| 0 Deafness,   | NA | . | REG CYTO.     | .         | BIO. | .                           | . |
| 0 Leukemia,   | NA | . | .             | KEGG PID. | BIO  | REACTOME_SIGNALING_BY_RHO_G |   |
| 0 {Diabetes r | NA | . | NUC CYTO.     | .         | .    | REACTOME_INTERFERON_GAMMA   |   |
| 0 Bladder ca  | NA | . | REG NUC KINA  | KEGG PID. | BIO  | REACTOME_CELL_CYCLE;REACTO  |   |
| 0 .           | NA | . | .             | .         | .    | .                           | . |
| 0 .           | NA | . | .             | .         | .    | .                           | . |
| 0 .           | NA | . | .             | .         | .    | .                           | . |
| 0 .           | NA | . | .             | .         | .    | .                           | . |
| 0 .           | NA | . | PRO VESI.     | KEGG.     | .    | REACTOME_DIABETES_PATHWAYS  |   |
| 0 .           | NA | . | .             | .         | .    | .                           | . |
| 0 .           | NA | . | .             | .         | .    | .                           | . |
| 0 .           | NA | . | .             | .         | .    | .                           | . |
| 0 .           | NA | . | .             | .         | .    | .                           | . |
| 0 Spinoceret  | NA | . | .             | .         | .    | .                           | . |
| 0 .           | NA | . | INTRCATI.     | .         | .    | REACTOME_TRANSMEMBRANE_TF   |   |
| 0 .           | NA | . | .             | .         | .    | .                           | . |
| 0 .           | NA | . | .             | .         | .    | .                           | . |
| 0 .           | NA | . | CELI.         | KEGG.     | .    | .                           | . |
| 0 Episodic at | NA | . | REG INTRCATI  | KEGG.     | .    | REACTOME_TRANSMISSION_ACRC  |   |
| 0 .           | NA | . | .             | KEGG.     | .    | REACTOME_SIGNALING_BY_GPCR  |   |
| 0 .           | NA | . | .             | .         | .    | .                           | . |
| 0 .           | NA | . | SYS PRO.      | .         | .    | .                           | . |
| 0 .           | NA | . | EST/INTRCATI. | .         | .    | REACTOME_NEURONAL_SYSTEM;F  |   |
| 0 .           | NA | . | .             | .         | .    | .                           | . |
| 0 .           | NA | . | .             | .         | .    | .                           | . |
| 0 .           | NA | . | .             | .         | .    | .                           | . |
| 0 .           | NA | . | CEN ORG KINA. | .         | .    | REACTOME_CELL_CYCLE;REACTO  |   |
| 0 .           | NA | . | .             | .         | .    | REACTOME_TRANSMEMBRANE_TF   |   |

|             |    |   |                           |                 |                                |                             |
|-------------|----|---|---------------------------|-----------------|--------------------------------|-----------------------------|
| 0.          | NA | . | BIOF INTR PRO .           | .               | .                              | .                           |
| 0.          | NA | . | BIOF INTR PRO .           | .               | .                              | .                           |
| 0.          | NA | . | EST/ MEM .                | .               | .                              | .                           |
| 0.          | NA | . | PRO . KINA KEG (PID .     | BIO REACTOME_   | SIGNALLING_BY_NGF;             |                             |
| 0.          | NA | . | .                         | .               | .                              | .                           |
| 0.          | NA | . | .                         | .               | .                              | .                           |
| 0.          | NA | . | .                         | .               | .                              | .                           |
| 0.          | NA | . | .                         | .               | .                              | .                           |
| 0.          | NA | . | NEG NUC TRAI .            | PID .           | REACTOME_RNA_POL_III_TRANSC    |                             |
| 0.          | NA | . | .                         | PID .           | .                              |                             |
| 0.          | NA | . | .                         | .               | .                              | .                           |
| 0.          | NA | . | .                         | .               | .                              | .                           |
| 0.          | NA | . | .                         | IDEN KEG (PID . | BIO .                          |                             |
| 0.          | NA | . | .                         | .               | .                              | .                           |
| 0.          | NA | . | RNA . TRAI .              | PID .           | .                              |                             |
| 0.          | NA | . | .                         | .               | .                              | .                           |
| 0.          | NA | . | EST/ .                    | .               | .                              | .                           |
| 0.          | NA | . | .                         | .               | .                              | .                           |
| 0.          | NA | . | .                         | .               | .                              | .                           |
| 0.          | NA | . | .                         | KEG (PID .      | REACTOME_SIGNALING_BY_RHO_     |                             |
| 0 Leukoence | NA | . | REG CYT (TRAI .           | .               | BIO REACTOME_TRANSLATION;REACT |                             |
| 0.          | NA | . | .                         | .               | .                              | .                           |
| 0.          | NA | . | .                         | .               | .                              | .                           |
| 0.          | NA | . | ORGRNA .                  | .               | .                              | .                           |
| 0.          | NA | . | .                         | .               | .                              | .                           |
| 0.          | NA | . | .                         | .               | .                              | .                           |
| 0.          | NA | . | .                         | .               | .                              | .                           |
| 0.          | NA | . | .                         | .               | .                              | REACTOME_CELL_CELL_COMMUNI  |
| 0.          | NA | . | .                         | .               | .                              | .                           |
| 0.          | NA | . | .                         | .               | .                              | .                           |
| 0.          | NA | . | .                         | KEG ( .         | .                              | .                           |
| 0.          | NA | . | .                         | .               | .                              | .                           |
| 0.          | NA | . | .                         | .               | .                              | .                           |
| 0.          | NA | . | .                         | .               | PID .                          | .                           |
| 0.          | NA | . | .                         | .               | .                              | .                           |
| 0.          | NA | . | .                         | .               | .                              | .                           |
| 0 {Diabetes | NA | . | EST/ CYT (KINA KEG (PID . | .               | .                              | .                           |
| 0.          | NA | . | .                         | .               | .                              | .                           |
| 0.          | NA | . | .                         | .               | .                              | .                           |
| 0.          | NA | . | .                         | .               | .                              | .                           |
| 0.          | NA | . | .                         | .               | .                              | .                           |
| 0.          | NA | . | .                         | .               | .                              | .                           |
| 0.          | NA | . | .                         | .               | .                              | .                           |
| 0.          | NA | . | .                         | .               | .                              | .                           |
| 0 Nephrono  | NA | . | .                         | .               | .                              | REACTOME_SIGNALING_BY_HIPPC |
| 0 Nephrono  | NA | . | .                         | .               | .                              | REACTOME_SIGNALING_BY_HIPPC |
| 0.          | NA | . | .                         | .               | .                              | .                           |
| 0.          | NA | . | .                         | .               | .                              | .                           |
| 0.          | NA | . | .                         | .               | .                              | .                           |
| 0.          | NA | . | .                         | .               | .                              | .                           |
| 0.          | NA | . | .                         | .               | .                              | .                           |

|    |            |    |      |      |      |      |      |                            |                             |
|----|------------|----|------|------|------|------|------|----------------------------|-----------------------------|
| 0. | NA         | .  | .    | .    | .    | .    | .    | .                          | .                           |
| 0. | NA         | .  | .    | .    | .    | .    | .    | .                          | .                           |
| 0. | NA         | .  | .    | .    | .    | .    | .    | .                          | .                           |
| 0. | NA         | .  | .    | .    | .    | .    | .    | .                          | .                           |
| 0. | NA         | .  | .    | .    | .    | .    | .    | .                          | .                           |
| 0. | NA         | .  | .    | .    | .    | .    | .    | .                          | .                           |
| 0. | NA         | .  | .    | .    | .    | .    | .    | .                          | .                           |
| 0. | NA         | .  | SIGN | CYT  | .    | .    | .    | .                          | .                           |
| 0  | Noonan sy  | NA | CM1  | SIGN | MEM  | GTP  | .    | PID                        | REACTOME_SIGNALLING_BY_NGF; |
| 0. | NA         | .  | .    | .    | .    | .    | .    | .                          | .                           |
| 0. | NA         | .  | CELI | MEM  | CATI | KEGC | .    | .                          | .                           |
| 0. | NA         | .  | .    | .    | .    | .    | .    | .                          | .                           |
| 0. | NA         | .  | .    | .    | .    | .    | .    | .                          | .                           |
| 0. | NA         | .  | .    | .    | .    | .    | .    | .                          | .                           |
| 0. | NA         | .  | .    | INTR | CATI | .    | .    | .                          | REACTOME_TRANSMEMBRANE_TF   |
| 0. | NA         | .  | .    | .    | .    | .    | .    | .                          | .                           |
| 0. | NA         | .  | .    | ORGR | NA   | .    | .    | .                          | .                           |
| 0. | NA         | .  | .    | CYT  | REC  | KEGC | .    | .                          | REACTOME_TRANSLATION;REACT  |
| 0. | NA         | .  | EST  | .    | HYD  | .    | .    | .                          | REACTOME_TRANSMEMBRANE_TF   |
| 0. | NA         | .  | EST  | INTR | NUC  | KEGC | .    | .                          | REACTOME_HYALURONAN_METAB   |
| 0. | NA         | .  | .    | .    | .    | .    | .    | .                          | REACTOME_TRANSMEMBRANE_TF   |
| 0. | NA         | .  | .    | .    | .    | .    | .    | .                          | .                           |
| 0  | Sebaceous  | NA | .    | .    | SEQ  | KEGC | PID  | BIO                        | .                           |
| 0. | NA         | .  | .    | .    | .    | .    | .    | .                          | .                           |
| 0. | NA         | .  | SIGN | .    | KEGC | PID  | .    | .                          | REACTOME_VEGF_LIGAND_RECEF  |
| 0. | NA         | .  | .    | .    | .    | .    | .    | .                          | .                           |
| 0. | NA         | .  | .    | .    | .    | .    | .    | .                          | .                           |
| 0. | NA         | .  | .    | .    | .    | .    | .    | .                          | .                           |
| 0  | Myelodysp  | NA | .    | .    | .    | KEGC | .    | .                          | REACTOME_TRIGLYCERIDE_BIOSY |
| 0. | NA         | .  | .    | .    | .    | .    | .    | .                          | .                           |
| 0. | NA         | .  | .    | .    | .    | KEGC | .    | .                          | .                           |
| 0. | NA         | .  | .    | .    | .    | KEGC | PID  | .                          | REACTOME_DEVELOPMENTAL_BIC  |
| 0. | NA         | .  | .    | .    | .    | .    | .    | .                          | .                           |
| 0. | NA         | .  | SYS  | .    | .    | .    | .    | .                          | .                           |
| 0. | NA         | .  | .    | .    | .    | .    | .    | .                          | .                           |
| 0  | {Asthma, s | NA | .    | DEFI | .    | REC  | KEGC | .                          | REACTOME_ANTIGEN_PROCESSIN  |
| 0. | NA         | .  | .    | .    | .    | .    | .    | .                          | .                           |
| 0  | Deafness,  | NA | .    | .    | .    | KEGC | PID  | .                          | REACTOME_EXTRACELLULAR_MAT  |
| 0. | NA         | .  | .    | .    | .    | .    | .    | .                          | .                           |
| 0. | NA         | .  | .    | .    | .    | .    | .    | .                          | .                           |
| 0. | NA         | .  | .    | .    | .    | .    | .    | .                          | .                           |
| 0. | NA         | .  | .    | .    | .    | KEGC | BIO  | REACTOME_PHOSPHOLIPID_META | .                           |
| 0. | NA         | .  | .    | .    | .    | .    | .    | .                          | .                           |
| 0. | NA         | .  | .    | .    | .    | .    | .    | .                          | .                           |
| 0. | NA         | .  | SYS  | .    | .    | .    | .    | .                          | .                           |
| 0. | NA         | .  | .    | .    | .    | .    | .    | .                          | .                           |
| 0. | NA         | .  | .    | .    | .    | .    | .    | .                          | .                           |
| 0. | NA         | .  | .    | .    | .    | .    | .    | .                          | .                           |
| 0. | NA         | .  | .    | .    | .    | .    | .    | .                          | .                           |
| 0. | NA         | .  | RNA  | NUC  | .    | .    | .    | .                          | .                           |
| 0. | NA         | .  | .    | .    | .    | .    | .    | .                          | .                           |
| 0. | NA         | .  | .    | .    | .    | .    | .    | .                          | .                           |
| 0. | NA         | .  | .    | .    | .    | .    | .    | .                          | .                           |
| 0  | Brachydac  | NA | .    | SIGN | INTR | TRAI | .    | PID                        | .                           |







|                 |    |   |      |      |      |             |                             |
|-----------------|----|---|------|------|------|-------------|-----------------------------|
| 0 .             | NA | . | .    | .    | .    | KEGCPID.BIO | REACTOME_SIGNALING_BY_GPCR  |
| 0 Myelodysp     | NA | . | .    | .    | .    | .           | .                           |
| 0 Cornelia de   | NA | . | .    | .    | .    | .           | .                           |
| 0 .             | NA | . | .    | .    | .    | .           | REACTOME_TRANSMEMBRANE_TF   |
| 0 .             | NA | . | .    | .    | .    | .           | .                           |
| 0 .             | NA | . | .    | .    | .    | .           | .                           |
| 0 .             | NA | . | .    | .    | .    | .           | .                           |
| 0 Cardiomyo     | NA | . | SYS  | NUC  | .    | .           | .                           |
| 0 {H. pylori ir | NA | . | SYS  | INTR | PRO  | KEGC        | .                           |
| 0 .             | NA | . | .    | .    | .    | PID         | .                           |
| 0 .             | NA | . | .    | .    | .    | .           | .                           |
| 0 .             | NA | . | RNA  | NUC  | .    | .           | .                           |
| 0 .             | NA | . | .    | .    | .    | .           | .                           |
| 0 .             | NA | . | .    | .    | .    | .           | .                           |
| 0 Erythrocyt    | NA | . | SYS  | .    | PRO  | KEGCPID.BIO | REACTOME_SIGNALING_BY_SCF_H |
| 0 .             | NA | . | GEN  | CYT  | NUC  | .           | .                           |
| 0 .             | NA | . | .    | INTR | .    | KEGC        | REACTOME_HS_GAG_BIOSYNTHES  |
| 0 .             | NA | . | .    | .    | .    | KEGC        | .                           |
| 0 .             | NA | . | RNA  | ORG  | .    | .           | .                           |
| 0 .             | NA | . | .    | NUC  | TRAI | .           | .                           |
| 0 .             | NA | . | .    | .    | .    | .           | .                           |
| 0 .             | NA | . | .    | .    | .    | .           | .                           |
| 0 .             | NA | . | .    | .    | .    | .           | .                           |
| 0 .             | NA | . | PRO  | .    | ACIC | KEGCPID.BIO | REACTOME_SIGNALLING_BY_NGF; |
| 0 .             | NA | . | RNA  | NUC  | RNA  | KEGC        | .                           |
| 0 .             | NA | . | SYS  | CELL | PRO  | .           | REACTOME_CELL_CELL_COMMUNI  |
| 0 .             | NA | . | .    | INTR | .    | .           | .                           |
| 0 .             | NA | . | .    | .    | .    | .           | .                           |
| 0 Hypertrigly   | NA | . | .    | .    | OXIL | KEGC        | REACTOME_TRIGLYCERIDE_BIOSY |
| 0 .             | NA | . | .    | .    | .    | .           | .                           |
| 0 .             | NA | . | .    | .    | .    | .           | .                           |
| 0 .             | NA | . | SIGN | INTR | .    | .           | REACTOME_SIGNALING_BY_GPCR  |
| 0 .             | NA | . | .    | INTR | .    | .           | REACTOME_HS_GAG_DEGRADATI   |
| 0 .             | NA | . | .    | .    | .    | .           | .                           |
| 0 .             | NA | . | .    | .    | .    | .           | .                           |
| 0 Prader-Wil    | NA | . | NEG  | .    | .    | PID         | .                           |
| 0 .             | NA | . | .    | .    | .    | .           | .                           |
| 0 .             | NA | . | .    | .    | .    | PID         | .                           |
| 0 .             | NA | . | .    | .    | .    | .           | .                           |
| 0 .             | NA | . | .    | .    | .    | .           | .                           |
| 0 .             | NA | . | .    | INTR | MET  | KEGCPID.BIO | .                           |
| 0 .             | NA | . | .    | ORG  | PRO  | .           | .                           |
| 0 .             | NA | . | .    | .    | .    | .           | .                           |
| 0 .             | NA | . | .    | .    | MOT  | KEGC        | .                           |
| 0 .             | NA | . | .    | .    | .    | .           | .                           |
| 0 .             | NA | . | .    | .    | .    | .           | .                           |
| 0 Mannosidc     | NA | . | GLY  | .    | HYD  | KEGC        | .                           |
| 0 Cold-induc    | NA | . | .    | EXTI | REC  | .           | .                           |
| 0 .             | NA | . | .    | .    | .    | .           | .                           |
| 0 .             | NA | . | .    | .    | .    | .           | .                           |
| 0 .             | NA | . | SYS  | .    | NUC  | KEGCPID.BIO | .                           |
| 0 .             | NA | . | .    | NUC  | .    | KEGC        | .                           |

|    |             |    |               |                     |          |                               |   |   |
|----|-------------|----|---------------|---------------------|----------|-------------------------------|---|---|
| 0. | NA          | .  | .             | .                   | .        | .                             | . | . |
| 0. | NA          | .  | SEN.          | .                   | .        | .                             | . | . |
| 0. | NA          | .  | SEN.          | .                   | .        | .                             | . | . |
| 0. | NA          | .  | .             | .                   | .        | .                             | . | . |
| 0. | NA          | .  | .             | .                   | .        | .                             | . | . |
| 0. | NA          | .  | .             | .                   | .        | .                             | . | . |
| 0  | Duane-rad   | NA | .             | .                   | .        | PID.                          | . | . |
| 0. | NA          | .  | .             | .                   | .        | .                             | . | . |
| 0. | NA          | .  | PRO PRO INTE. | .                   | .        | .                             | . | . |
| 0. | NA          | .  | .             | .                   | .        | .                             | . | . |
| 0. | NA          | .  | .             | .                   | .        | .                             | . | . |
| 0. | NA          | .  | .             | .                   | KEG(PID. | REACTOME_CELL_CELL_COMMUNI    | . | . |
| 0. | NA          | .  | .             | .                   | .        | .                             | . | . |
| 0. | NA          | .  | .             | .                   | .        | .                             | . | . |
| 0  | Dent disea  | NA | .             | LIPII ORG PHO KEGC. | .        | REACTOME_SIGNALING_BY_RHO_    | . | . |
| 0. | NA          | .  | INTRG_PI.     | .                   | .        | .                             | . | . |
| 0. | NA          | .  | .             | .                   | .        | .                             | . | . |
| 0  | Hemophiliz  | NA | CM0 REG.      | .                   | KEGC.    | BIO REACTOME_RESPONSE_TO_ELEV | . | . |
| 0. | NA          | .  | .             | .                   | .        | .                             | . | . |
| 0. | NA          | .  | .             | .                   | .        | .                             | . | . |
| 0. | NA          | .  | .             | .                   | .        | .                             | . | . |
| 0. | NA          | .  | .             | .                   | .        | .                             | . | . |
| 0. | NA          | .  | .             | .                   | .        | .                             | . | . |
| 0. | NA          | .  | EST).         | .                   | KEGC.    | .                             | . | . |
| 0. | NA          | .  | .             | .                   | .        | .                             | . | . |
| 0. | NA          | .  | .             | .                   | .        | .                             | . | . |
| 0. | NA          | .  | .             | .                   | .        | .                             | . | . |
| 0. | NA          | .  | .             | .                   | .        | .                             | . | . |
| 0. | NA          | .  | .             | .                   | .        | .                             | . | . |
| 0. | NA          | .  | .             | .                   | .        | .                             | . | . |
| 0. | NA          | .  | .             | .                   | .        | .                             | . | . |
| 0. | NA          | .  | .             | .                   | .        | .                             | . | . |
| 0. | NA          | .  | .             | .                   | .        | .                             | . | . |
| 0. | NA          | .  | .             | .                   | .        | .                             | . | . |
| 0. | NA          | .  | .             | .                   | .        | .                             | . | . |
| 0. | NA          | .  | .             | .                   | .        | .                             | . | . |
| 0. | NA          | .  | .             | .                   | .        | .                             | . | . |
| 0. | NA          | .  | .             | .                   | .        | .                             | . | . |
| 0. | NA          | .  | .             | .                   | .        | .                             | . | . |
| 0. | NA          | .  | .             | .                   | .        | .                             | . | . |
| 0. | NA          | .  | .             | .                   | .        | .                             | . | . |
| 0. | NA          | .  | .             | .                   | .        | .                             | . | . |
| 0. | NA          | .  | .             | .                   | .        | .                             | . | . |
| 0. | NA          | .  | .             | .                   | .        | .                             | . | . |
| 0. | NA          | .  | .             | .                   | .        | .                             | . | . |
| 0  | Deafness,   | NA | .             | REG NON.            | .        | .                             | . | . |
| 0  | Albinism, c | NA | .             | .                   | .        | .                             | . | . |
| 0  | Pulmonary   | NA | .             | .                   | .        | PID.                          | . | . |
| 0. | NA          | .  | MUL ORG REC.  | .                   | .        | .                             | . | . |
| 0. | NA          | .  | .             | .                   | .        | .                             | . | . |
| 0. | NA          | .  | .             | .                   | .        | .                             | . | . |
| 0. | NA          | .  | .             | .                   | .        | .                             | . | . |
| 0. | NA          | .  | .             | .                   | .        | .                             | . | . |
| 0. | NA          | .  | .             | .                   | .        | .                             | . | . |
| 0. | NA          | .  | .             | .                   | .        | .                             | . | . |
| 0. | NA          | .  | .             | .                   | .        | .                             | . | . |
| 0. | NA          | .  | .             | .                   | .        | .                             | . | . |
| 0. | NA          | .  | GAM CYT       | .                   | .        | .                             | . | . |
| 0. | NA          | .  | .             | .                   | .        | .                             | . | . |
| 0. | NA          | .  | .             | .                   | .        | .                             | . | . |
| 0. | NA          | .  | .             | .                   | .        | .                             | . | . |



|     |              |    |                           |                 |              |           |   |                             |   |   |
|-----|--------------|----|---------------------------|-----------------|--------------|-----------|---|-----------------------------|---|---|
| 0 . | NA           | .  | .                         | .               | .            | .         | . | .                           | . | . |
| 0 . | NA           | .  | .                         | .               | .            | .         | . | .                           | . | . |
| 0 . | NA           | .  | .                         | .               | .            | .         | . | .                           | . | . |
| 0 . | NA           | .  | PRO ORG.                  | .               | .            | .         | . | .                           | . | . |
| 0 . | NA           | .  | .                         | .               | .            | .         | . | .                           | . | . |
| 0 . | NA           | .  | DNA .                     | DNA .           | .            | .         | . | REACTOME_MEIOSIS;REACTOME_I |   |   |
| 0   | Alagille syr | NA | REG INTR SPE(KEG(CPID .   |                 |              |           |   | REACTOME_PRE_NOTCH_TRANSC   |   |   |
| 0 . | NA           | .  | .                         | .               | .            | .         | . | .                           | . | . |
| 0 . | NA           | .  | .                         | .               | .            | .         | . | .                           | . | . |
| 0 . | NA           | .  | .                         | .               | .            | .         | . | .                           | . | . |
| 0 . | NA           | .  | .                         | .               | .            | .         | . | .                           | . | . |
| 0 . | NA           | .  | .                         | .               | .            | .         | . | .                           | . | . |
| 0 . | NA           | .  | .                         | .               | .            | .         | . | .                           | . | . |
| 0 . | NA           | .  | .                         | .               | CATI.        | .         | . | .                           | . | . |
| 0 . | NA           | .  | .                         | .               | .            | .         | . | .                           | . | . |
| 0 . | NA           | .  | SIGN .                    | RAS .           | .            | .         | . | .                           | . | . |
| 0 . | NA           | .  | .                         | .               | .            | .         | . | .                           | . | . |
| 0 . | NA           | .  | REG .                     | .               | KEG(CPID .   |           |   | REACTOME_REGULATION_OF_COI  |   |   |
| 0   | Cardiomyo    | NA | MUS ORG NUC KEGC .        |                 |              |           |   |                             |   |   |
| 0 . | NA           | .  | .                         | .               | .            | PID.BIO . |   |                             |   |   |
| 0   | Spinoceret   | NA | INTRCATI(KEGC .           |                 |              |           |   |                             |   |   |
| 0 . | NA           | .  | .                         | .               | .            | .         | . | .                           | . | . |
| 0 . | NA           | .  | PRO CATI.                 | .               | .            | .         | . | .                           | . | . |
| 0 . | NA           | .  | SYS INTR LIPO.            | .               | .            | .         | . | .                           | . | . |
| 0 . | NA           | .  | .                         | .               | .            | .         | . | .                           | . | . |
| 0 . | NA           | .  | .                         | .               | KEG(CPID .   |           |   | REACTOME_INTEGRIN_CELL_SURF |   |   |
| 0 . | NA           | .  | .                         | .               | .            | .         | . | .                           | . | . |
| 0   | Megalobla    | NA | .                         | .               | KEG(CPID.BIO |           |   | REACTOME_TETRAHYDROBIOPTEI  |   |   |
| 0 . | NA           | .  | .                         | .               | .            | .         | . | .                           | . | . |
| 0 . | NA           | .  | .                         | .               | .            | .         | . | .                           | . | . |
| 0 . | NA           | .  | .                         | .               | .            | .         | . | .                           | . | . |
| 0 . | NA           | .  | SIGN INTR GAB KEGC .      |                 |              |           |   | REACTOME_TRANSMISSION_ACRC  |   |   |
| 0 . | NA           | .  | DNA NUC HYD .             | .               | .            | .         | . | .                           | . | . |
| 0 . | NA           | .  | .                         | .               | .            | .         | . | REACTOME_PHOSPHOLIPID_META  |   |   |
| 0 . | NA           | .  | .                         | .               | KEGC .       |           |   | REACTOME_PPARA_ACTIVATES_G  |   |   |
| 0   | Muscular d   | NA | MUS PRO STRI(KEG(CPID.BIO |                 |              |           |   | REACTOME_INTEGRIN_CELL_SURF |   |   |
| 0   | Mental retz  | NA | NUC DNA .                 | .               | .            | .         | . | .                           | . | . |
| 0 . | NA           | .  | SIGN CELI PRO KEG(CPID .  |                 |              |           |   |                             |   |   |
| 0   | Spinoceret   | NA | RNA NUC RNA KEG(CPID.BIO  |                 |              |           |   | REACTOME_RNA_POL_III_TRANSC |   |   |
| 0 . | NA           | .  | .                         | .               | .            | .         | . | .                           | . | . |
| 0   | Colorectal   | NA | DNA .                     | SING(KEG(CPID . |              |           |   |                             |   |   |
| 0   | Muscular d   | NA | .                         | .               | .            | .         | . | .                           | . | . |
| 0 . | NA           | .  | .                         | .               | .            | .         | . | .                           | . | . |
| 0 . | NA           | .  | .                         | .               | .            | .         | . | .                           | . | . |
| 0 . | NA           | .  | .                         | .               | .            | .         | . | .                           | . | . |
| 0 . | NA           | .  | .                         | .               | .            | .         | . | .                           | . | . |
| 0   | Maturity-or  | NA | SIGN .                    | .               | PID .        |           |   | REACTOME_ANTIGEN_ACTIVATES_ |   |   |
| 0 . | NA           | .  | .                         | .               | .            | .         | . | .                           | . | . |
| 0 . | NA           | .  | .                         | .               | .            | .         | . | .                           | . | . |
| 0 . | NA           | .  | .                         | CYT(ELE(KEGC .  |              |           |   | REACTOME_TCA_CYCLE_AND_RES  |   |   |
| 0 . | NA           | .  | SIGN EXTIHYD KEG(CPID .   |                 |              |           |   | REACTOME_GASTRIN_CREB_SIGN  |   |   |
| 0 . | NA           | .  | .                         | .               | KEGC .       |           |   | .                           | . | . |
| 0 . | NA           | .  | REG UBIC ACIC .           | .               | .            | .         | . | .                           | . | . |

|     |            |    |   |                 |                |                             |                            |
|-----|------------|----|---|-----------------|----------------|-----------------------------|----------------------------|
| 0 . | NA         | .  | . | CYT(            | KEGC.          | .                           | .                          |
| 0 . | NA         | .  | . | CELI MEM/ CATI  | KEGC.          | .                           | REACTOME_TRANSMISSION_ACRC |
| 0   | Cardiomyo  | NA | . | .               | .              | .                           | .                          |
| 0 . | NA         | .  | . | .               | .              | .                           | .                          |
| 0 . | NA         | .  | . | .               | .              | .                           | .                          |
| 0 . | NA         | .  | . | NUC NUC         | KEGC.          | .                           | .                          |
| 0 . | NA         | .  | . | .               | .              | .                           | .                          |
| 0 . | NA         | .  | . | POS .           | .              | KEGC( PID, BIO .            | .                          |
| 0 . | NA         | .  | . | .               | .              | .                           | .                          |
| 0 . | NA         | .  | . | .               | RAS .          | PID .                       | .                          |
| 0 . | NA         | .  | . | .               | .              | .                           | .                          |
| 0 . | NA         | .  | . | GLY(            | TRAI           | KEGC.                       | REACTOME_METABOLISM_OF_PRC |
| 0 . | NA         | .  | . | .               | .              | .                           | .                          |
| 0 . | NA         | .  | . | PRO COLI .      | .              | .                           | .                          |
| 0   | Spastic pa | NA | . | .               | .              | .                           | .                          |
| 0 . | NA         | .  | . | .               | .              | .                           | .                          |
| 0 . | NA         | .  | . | .               | .              | .                           | .                          |
| 0 . | NA         | .  | . | .               | .              | .                           | .                          |
| 0 . | NA         | .  | . | .               | .              | .                           | .                          |
| 0 . | NA         | .  | . | .               | .              | .                           | .                          |
| 0   | Congenital | NA | . | REG ORG .       | .              | .                           | .                          |
| 0 . | NA         | .  | . | .               | .              | .                           | .                          |
| 0 . | NA         | .  | . | .               | .              | .                           | .                          |
| 0 . | NA         | .  | . | INTR .          | .              | .                           | .                          |
| 0 . | NA         | .  | . | RES EXTIG_ PI   | KEGC( PID, BIO | REACTOME_SIGNALING_BY_GPCR  | .                          |
| 0 . | NA         | .  | . | .               | .              | .                           | .                          |
| 0 . | NA         | .  | . | .               | .              | .                           | .                          |
| 0 . | NA         | .  | . | .               | KEGC( PID .    | REACTOME_GAP_JUNCTION_DEGF  | .                          |
| 0 . | NA         | .  | . | .               | .              | .                           | .                          |
| 0   | Amyotroph  | NA | . | PRO ORG HYD .   | .              | .                           | .                          |
| 0   | 46XY sex r | NA | . | .               | .              | .                           | .                          |
| 0 . | NA         | .  | . | PRO ORG CHA .   | .              | REACTOME_PROTEIN_FOLDING;RE | .                          |
| 0 . | NA         | .  | . | .               | .              | .                           | .                          |
| 0 . | NA         | .  | . | .               | .              | .                           | .                          |
| 0 . | NA         | .  | . | .               | GLU' KEGC.     | REACTOME_TRANSMISSION_ACRC  | .                          |
| 0 . | NA         | .  | . | LIPII .         | SUBI .         | .                           | .                          |
| 0 . | NA         | .  | . | SIGN INTR .     | .              | REACTOME_CELL_CELL_COMMUNI  | .                          |
| 0   | Exocrine p | NA | . | .               | CATI           | KEGC.                       | .                          |
| 0 . | NA         | .  | . | .               | .              | .                           | .                          |
| 0 . | NA         | .  | . | .               | .              | .                           | .                          |
| 0 . | NA         | .  | . | .               | .              | .                           | .                          |
| 0 . | NA         | .  | . | .               | .              | .                           | .                          |
| 0 . | NA         | .  | . | .               | .              | .                           | .                          |
| 0 . | NA         | .  | . | .               | .              | .                           | .                          |
| 0   | Chondrody  | NA | . | BIOF NUC HYD .  | PID, BIO       | REACTOME_NOTCH1_INTRACELLU  | .                          |
| 0 . | NA         | .  | . | .               | .              | .                           | .                          |
| 0   | Dent disea | NA | . | CMO EST/ INTR . | .              | .                           | .                          |
| 0 . | NA         | .  | . | .               | .              | .                           | .                          |
| 0 . | NA         | .  | . | .               | .              | .                           | .                          |
| 0 . | NA         | .  | . | .               | .              | .                           | .                          |
| 0 . | NA         | .  | . | .               | .              | .                           | .                          |



|               |    |      |            |       |           |                                 |   |   |   |
|---------------|----|------|------------|-------|-----------|---------------------------------|---|---|---|
| 0.            | NA | .    | .          | .     | .         | .                               | . | . | . |
| 0.            | NA | .    | .          | .     | .         | .                               | . | . | . |
| 0.            | NA | .    | PHO INTR   | PHO.  | PID.      | REACTOME_SYNTHESIS_OF_PIPS_     | . | . | . |
| 0.            | NA | .    | .          | .     | KEGC(PID. | REACTOME_CELL_CELL_COMMUNI      | . | . | . |
| 0 Ataxia-tela | NA | .    | DNA.       | PHO   | KEGC(PID  | BIO REACTOME_MEIOSIS;REACTOME_  | . | . | . |
| 0.            | NA | .    | .          | CYT(. | .         | REACTOME_DIABETES_PATHWAYS      | . | . | . |
| 0.            | NA | .    | .          | .     | .         | .                               | . | . | . |
| 0.            | NA | .    | .          | .     | .         | .                               | . | . | . |
| 0 Leukemia,   | NA | .    | .          | TRAI  | KEGC.     | .                               | . | . | . |
| 0 Bladder ca  | NA | CM0. | .          | .     | KEGC(PID  | BIO REACTOME_SIGNALLING_BY_NGF; | . | . | . |
| 0 Spastic pai | NA | .    | EST/ORG.   | .     | .         | REACTOME_MHC_CLASS_II_ANTIG     | . | . | . |
| 0.            | NA | .    | .          | .     | .         | REACTOME_NEURONAL_SYSTEM;F      | . | . | . |
| 0.            | NA | .    | .          | .     | .         | .                               | . | . | . |
| 0.            | NA | .    | .          | .     | .         | .                               | . | . | . |
| 0.            | NA | .    | .          | .     | .         | .                               | . | . | . |
| 0.            | NA | .    | .          | .     | .         | .                               | . | . | . |
| 0.            | NA | .    | .          | .     | .         | .                               | . | . | . |
| 0 Prader-Wil  | NA | .    | NEG.       | .     | PID.      | .                               | . | . | . |
| 0.            | NA | .    | SIGNINTR.  | KEGC. | BIO       | REACTOME_TRANSMISSION_ACRC      | . | . | . |
| 0.            | NA | .    | .          | .     | .         | .                               | . | . | . |
| 0.            | NA | .    | .          | .     | .         | .                               | . | . | . |
| 0.            | NA | .    | .          | .     | .         | .                               | . | . | . |
| 0.            | NA | .    | .          | .     | .         | .                               | . | . | . |
| 0.            | NA | .    | SYS`.      | .     | .         | .                               | . | . | . |
| 0.            | NA | .    | .          | .     | .         | .                               | . | . | . |
| 0 Autoinflam  | NA | .    | .          | .     | KEGC(PID. | REACTOME_ANTIGEN_ACTIVATES_     | . | . | . |
| 0.            | NA | .    | .          | .     | PID.      | .                               | . | . | . |
| 0.            | NA | .    | .          | .     | .         | .                               | . | . | . |
| 0.            | NA | .    | .          | .     | .         | .                               | . | . | . |
| 0.            | NA | .    | .          | PRO.  | .         | .                               | . | . | . |
| 0.            | NA | .    | .          | .     | .         | .                               | . | . | . |
| 0.            | NA | .    | .          | .     | .         | .                               | . | . | . |
| 0 Adams-Oli   | NA | .    | .          | .     | PID.      | REACTOME_FACTORS_INVOLVED_      | . | . | . |
| 0.            | NA | .    | .          | .     | .         | .                               | . | . | . |
| 0.            | NA | .    | .          | .     | .         | REACTOME_GENERIC_TRANSCRIP      | . | . | . |
| 0.            | NA | .    | .          | .     | .         | .                               | . | . | . |
| 0.            | NA | .    | REG        | CYT(  | PRO.      | .                               | . | . | . |
| 0.            | NA | .    | .          | .     | .         | .                               | . | . | . |
| 0.            | NA | .    | .          | .     | .         | .                               | . | . | . |
| 0.            | NA | .    | .          | .     | .         | .                               | . | . | . |
| 0.            | NA | .    | .          | .     | .         | .                               | . | . | . |
| 0.            | NA | .    | CELI INTR. | KEGC. | .         | .                               | . | . | . |
| 0.            | NA | .    | REG        | COA.  | .         | REACTOME_TRANSMISSION_ACRC      | . | . | . |
| 0.            | NA | .    | .          | .     | .         | .                               | . | . | . |
| 0.            | NA | .    | .          | .     | .         | .                               | . | . | . |
| 0.            | NA | .    | .          | .     | .         | .                               | . | . | . |
| 0.            | NA | .    | .          | .     | PID.      | .                               | . | . | . |
| 0 Lymphoprc   | NA | .    | CELI       | CYT(. | KEGC(PID. | .                               | . | . | . |
| 0.            | NA | .    | .          | .     | .         | .                               | . | . | . |
| 0.            | NA | .    | .          | .     | .         | .                               | . | . | . |
| 0 Favism;He   | NA | CM9  | GLU        | CYT(. | KEGC.     | REACTOME_METABOLISM_OF_CAF      | . | . | . |



|     |             |    |                |                  |                            |            |   |                             |   |
|-----|-------------|----|----------------|------------------|----------------------------|------------|---|-----------------------------|---|
| 0 . | NA          | .  | .              | .                | .                          | .          | . | .                           | . |
| 0 . | NA          | .  | NUC .          | .                | KEGC .                     | .          | . | REACTOME_METABOLISM_OF_CAF  | . |
| 0 . | NA          | .  | .              | .                | .                          | .          | . | .                           | . |
| 0 . | NA          | .  | DETI .         | TAS              | KEGC .                     | .          | . | REACTOME_SIGNALING_BY_GPCR  | . |
| 0 . | NA          | .  | SIGN CYT(GTP . | .                | .                          | .          | . | REACTOME_RAP1_SIGNALLING;RE | . |
| 0 . | NA          | .  | .              | .                | .                          | .          | . | .                           | . |
| 0 . | NA          | .  | .              | .                | .                          | .          | . | .                           | . |
| 0 . | NA          | .  | .              | .                | .                          | .          | . | .                           | . |
| 0 . | NA          | .  | .              | .                | .                          | .          | . | .                           | . |
| 0 . | NA          | .  | .              | .                | .                          | .          | . | .                           | . |
| 0 . | NA          | .  | .              | .                | .                          | .          | . | .                           | . |
| 0 . | NA          | .  | .              | .                | .                          | .          | . | .                           | . |
| 0 . | NA          | .  | .              | .                | .                          | .          | . | .                           | . |
| 0 . | NA          | .  | .              | .                | .                          | .          | . | .                           | . |
| 0 . | NA          | .  | .              | .                | .                          | .          | . | .                           | . |
| 0 . | Chronic gr  | NA | .              | INTRHYD          | KEGC .                     | .          | . | REACTOME_REVERSIBLE_HYDRAT  | . |
| 0 . | NA          | .  | DEFI .         | ELE(KEGC(PID.BIO | REACTOME_ANTIGEN_PROCESSIN | .          | . | REACTOME_ANTIGEN_PROCESSIN  | . |
| 0 . | NA          | .  | MUSINTRCATI .  | .                | .                          | .          | . | REACTOME_NEURONAL_SYSTEM;F  | . |
| 0 . | NA          | .  | .              | .                | .                          | .          | . | .                           | . |
| 0 . | NA          | .  | .              | .                | .                          | .          | . | .                           | . |
| 0 . | NA          | .  | .              | .                | KEGC .                     | .          | . | REACTOME_O_LINKED_GLYCOSYL  | . |
| 0 . | NA          | .  | .              | .                | .                          | .          | . | .                           | . |
| 0 . | Leukodystri | NA | .              | CELIORGCHA       | KEGC(PID .                 | .          | . | REACTOME_MITOCHONDRIAL_PRC  | . |
| 0 . | NA          | .  | EST/NUC .      | .                | .                          | .          | . | .                           | . |
| 0 . | Multiple su | NA | .              | .                | .                          | KEGC .     | . | REACTOME_PTM_GAMMA_CARBO)   | . |
| 0 . | NA          | .  | .              | .                | .                          | KEGC(PID . | . | REACTOME_BMAL1_CLOCK_NPASZ  | . |
| 0 . | NA          | .  | .              | .                | .                          | .          | . | .                           | . |
| 0 . | NA          | .  | .              | .                | .                          | PID .      | . | REACTOME_CELL_CYCLE;REACTO  | . |
| 0 . | NA          | .  | .              | .                | .                          | .          | . | .                           | . |
| 0 . | NA          | .  | .              | .                | .                          | .          | . | .                           | . |
| 0 . | NA          | .  | CELI NUC .     | .                | .                          | .          | . | .                           | . |
| 0 . | NA          | .  | CELI NUC .     | .                | .                          | .          | . | .                           | . |
| 0 . | NA          | .  | .              | .                | KEGC .                     | .          | . | .                           | . |
| 0 . | NA          | .  | .              | .                | .                          | .          | . | .                           | . |
| 0 . | NA          | .  | .              | .                | .                          | .          | . | .                           | . |
| 0 . | NA          | .  | .              | .                | .                          | .          | . | .                           | . |
| 0 . | NA          | .  | .              | .                | .                          | .          | . | .                           | . |
| 0 . | NA          | .  | .              | .                | .                          | .          | . | .                           | . |
| 0 . | NA          | .  | .              | .                | .                          | .          | . | .                           | . |
| 0 . | NA          | .  | .              | .                | .                          | .          | . | .                           | . |
| 0 . | NA          | .  | .              | .                | .                          | .          | . | .                           | . |
| 0 . | NA          | .  | GLY( .         | TRAI             | KEGC .                     | .          | . | REACTOME_O_LINKED_GLYCOSYL  | . |
| 0 . | NA          | .  | .              | .                | .                          | .          | . | .                           | . |
| 0 . | NA          | .  | .              | .                | KEGC .                     | .          | . | REACTOME_DEVELOPMENTAL_BIC  | . |
| 0 . | {Atopy, res | NA | .              | .                | .                          | .          | . | .                           | . |
| 0 . | Narcolepsy) | NA | .              | SYS              | .                          | .          | . | .                           | . |
| 0 . | NA          | .  | .              | .                | .                          | .          | . | .                           | . |
| 0 . | NA          | .  | .              | .                | .                          | .          | . | .                           | . |
| 0 . | NA          | .  | .              | .                | .                          | .          | . | .                           | . |
| 0 . | NA          | .  | .              | .                | .                          | .          | . | .                           | . |
| 0 . | NA          | .  | .              | .                | .                          | .          | . | .                           | . |
| 0 . | NA          | .  | .              | .                | .                          | .          | . | .                           | . |
| 0 . | NA          | .  | .              | .                | .                          | .          | . | .                           | . |
| 0 . | NA          | .  | .              | .                | .                          | .          | . | .                           | . |
| 0 . | NA          | .  | POS CYT( .     | .                | .                          | .          | . | .                           | . |
| 0 . | NA          | .  | .              | .                | .                          | .          | . | .                           | . |
| 0 . | NA          | .  | .              | .                | .                          | .          | . | .                           | . |
| 0 . | {Prostate c | NA | .              | REG CYT(STR      | KEGC(PID .                 | .          | . | .                           | . |
| 0 . | {Coronary   | NA | .              | .                | .                          | HYD .      | . | .                           | . |

|    |             |    |                  |              |                                |                            |
|----|-------------|----|------------------|--------------|--------------------------------|----------------------------|
| 0. | NA          | .  | SIGNUC TRAI.     | PID.BIO.     |                                |                            |
| 0. | NA          | .  | . CYT(.          | .            | .                              |                            |
| 0. | NA          | .  | NUC.             | .            | REACTOME_METABOLISM_OF_NOI     |                            |
| 0. | NA          | .  | .                | .            | .                              |                            |
| 0. | NA          | .  | .                | .            | .                              |                            |
| 0. | NA          | .  | .                | .            | .                              |                            |
| 0. | NA          | .  | .                | KEGC.        | REACTOME_INSULIN_RECEPTOR_I    |                            |
| 0. | NA          | .  | .                | .            | .                              |                            |
| 0. | NA          | .  | SYS COA.         | .            | .                              |                            |
| 0. | NA          | .  | BIOEXTI.         | .            | REACTOME_SIGNALLING_BY_NGF     |                            |
| 0. | NA          | .  | .                | .            | .                              |                            |
| 0. | NA          | .  | .                | .            | .                              |                            |
| 0  | Candidiasi  | NA | POS CYT( PRO     | KEGC.        | REACTOME_INNATE_IMMUNE_SYS     |                            |
| 0. | NA          | .  | .                | .            | .                              |                            |
| 0. | NA          | .  | .                | .            | .                              |                            |
| 0. | NA          | .  | SYS CELI.        | KEGC.        | REACTOME_CELL_CELL_COMMUNI     |                            |
| 0. | NA          | .  | .                | .            | .                              |                            |
| 0. | NA          | .  | REP EXTIMET      | KEGC.        | .                              |                            |
| 0. | NA          | .  | CELI CYT(GTP.    | KEGC(PID.BIO | REACTOME_DEVELOPMENTAL_BIC     |                            |
| 0. | NA          | .  | .                | .            | .                              |                            |
| 0. | NA          | .  | .                | KEGC.        | BIO REACTOME_METABOLISM_OF_AMI |                            |
| 0  | Hermansk    | NA | .                | .            | .                              |                            |
| 0. | NA          | .  | .                | .            | .                              |                            |
| 0. | NA          | .  | .                | .            | .                              |                            |
| 0. | NA          | .  | .                | .            | .                              |                            |
| 0. | NA          | .  | .                | .            | .                              |                            |
| 0. | NA          | .  | .                | .            | .                              |                            |
| 0  | Achondrog   | NA | SYS.             | KEGC(PID.    | REACTOME_DEVELOPMENTAL_BIC     |                            |
| 0. | NA          | .  | .                | .            | .                              |                            |
| 0. | NA          | .  | .                | .            | .                              |                            |
| 0  | Transpositi | NA | .                | .            | REACTOME_DEVELOPMENTAL_BIC     |                            |
| 0  | Diabetes r  | NA | CM0 REG MAC TRAI | KEGC(PID.BIO | REACTOME_DEVELOPMENTAL_BIC     |                            |
| 0. | NA          | .  | .                | PID.         | REACTOME_FACTORS_INVOLVED_     |                            |
| 0. | NA          | .  | ONE.             | MET.         | PID.                           | REACTOME_METABOLISM_OF_NOI |
| 0. | NA          | .  | .                | .            | .                              |                            |
| 0. | NA          | .  | .                | .            | .                              |                            |
| 0  | Prader-Wil  | NA | NEG.             | PID.         | .                              |                            |
| 0. | NA          | .  | MAC CELI.        | KEGC(PID.    | REACTOME_APOPTOTIC_CLEAVAG     |                            |
| 0. | NA          | .  | .                | .            | REACTOME_TRANSMISSION_ACRC     |                            |
| 0. | NA          | .  | .                | .            | .                              |                            |
| 0. | NA          | .  | .                | .            | .                              |                            |
| 0. | NA          | .  | .                | .            | .                              |                            |
| 0. | NA          | .  | .                | .            | .                              |                            |
| 0. | NA          | .  | .                | KEGC(PID.    | .                              |                            |
| 0. | NA          | .  | SIGN.            | REC.         | .                              |                            |
| 0. | NA          | .  | REG CYT(.        | .            | .                              |                            |
| 0. | NA          | .  | .                | .            | .                              |                            |
| 0. | NA          | .  | AMIN ORG SULI    | KEGC.        | .                              |                            |
| 0. | NA          | .  | .                | .            | .                              |                            |
| 0. | NA          | .  | INTR.            | KEGC(PID.    | REACTOME_INTEGRIN_CELL_SURF    |                            |

|                |    |   |                 |          |                                |   |
|----------------|----|---|-----------------|----------|--------------------------------|---|
| 0 .            | NA | . | DNA NUC PRO .   | .        | .                              | . |
| 0 .            | NA | . | .               | .        | .                              | . |
| 0 .            | NA | . | BIOCYT(ELEC.    | PID.     | .                              | . |
| 0 Epidermolj   | NA | . | INTR.           | KEG(PID. | REACTOME_CELL_CELL_COMMUNI     |   |
| 0 .            | NA | . | .               | KEG(PID. | REACTOME_INSULIN_RECEPTOR_     |   |
| 0 .            | NA | . | BIOF CELIOXIE.  | .        | BIO REACTOME_EXTRACELLULAR_MAT |   |
| 0 .            | NA | . | CELI INTR REC   | KEGC.    | BIO .                          |   |
| 0 .            | NA | . | .               | .        | REACTOME_O_LINKED_GLYCOSYL     |   |
| 0 .            | NA | . | .               | .        | REACTOME_O_LINKED_GLYCOSYL     |   |
| 0 .            | NA | . | .               | .        | .                              |   |
| 0 .            | NA | . | .               | .        | .                              |   |
| 0 .            | NA | . | NEG .           | TRAI.    | .                              | . |
| 0 .            | NA | . | RNA .           | TRAI.    | PID.                           | . |
| 0 .            | NA | . | RNA .           | TRAI.    | PID.                           | . |
| 0 .            | NA | . | RNA .           | TRAI.    | PID.                           | . |
| 0 .            | NA | . | RNA .           | TRAI.    | PID.                           | . |
| 0 .            | NA | . | .               | .        | REACTOME_GENERIC_TRANSCRIP     |   |
| 0 .            | NA | . | .               | .        | .                              |   |
| 0 .            | NA | . | .               | .        | .                              |   |
| 0 .            | NA | . | .               | .        | .                              |   |
| 0 .            | NA | . | REP INTR.       | .        | .                              | . |
| 0 [Bombay p    | NA | . | GLY(INTR TRAI   | KEGC.    | .                              | . |
| 0 [Bombay p    | NA | . | GLY(INTR TRAI   | KEGC.    | .                              | . |
| 0 .            | NA | . | POS EXTIREC .   | .        | .                              | . |
| 0 .            | NA | . | .               | .        | REACTOME_GENERIC_TRANSCRIP     |   |
| 0 .            | NA | . | .               | KEGC.    | .                              | . |
| 0 .            | NA | . | .               | .        | REACTOME_TRIGLYCERIDE_BIOSY    |   |
| 0 .            | NA | . | .               | .        | .                              |   |
| 0 .            | NA | . | .               | .        | .                              |   |
| 0 .            | NA | . | BIOF INTR PRO . | .        | .                              | . |
| 0 .            | NA | . | INTR.           | .        | .                              | . |
| 0 .            | NA | . | SYS' PRO .      | .        | .                              | . |
| 0 .            | NA | . | MUS NON ACTI.   | .        | .                              | . |
| 0 .            | NA | . | .               | .        | .                              | . |
| 0 .            | NA | . | CYT(.           | PID.     | REACTOME_SIGNALING_BY_RHO_     |   |
| 0 .            | NA | . | .               | .        | .                              | . |
| 0 .            | NA | . | .               | .        | .                              | . |
| 0 {Epilepsy, ( | NA | . | SIGN INTR GAB   | KEGC.    | .                              | . |
| 0 Palmoplan    | NA | . | .               | PID.     | .                              | . |
| 0 .            | NA | . | .               | .        | .                              | . |
| 0 .            | NA | . | NUC .           | KEG(PID  | BIO REACTOME_DOWNREGULATION_C  |   |
| 0 Ciliary dysl | NA | . | .               | PID.     | .                              | . |
| 0 Glycogen ε   | NA | . | MAC .           | KEGC.    | REACTOME_GLYCOGEN_BREAKDC      |   |
| 0 .            | NA | . | .               | .        | .                              | . |
| 0 .            | NA | . | .               | .        | .                              | . |
| 0 .            | NA | . | .               | .        | .                              | . |
| 0 .            | NA | . | .               | .        | .                              | . |
| 0 .            | NA | . | HYD .           | .        | .                              | . |
| 0 Epidermolj   | NA | . | SYS' .          | KEG(PID. | REACTOME_CELL_CELL_COMMUNI     |   |
| 0 .            | NA | . | .               | .        | .                              | . |
| 0 .            | NA | . | .               | .        | .                              | . |
| 0 .            | NA | . | RNA NUC TRAI.   | .        | .                              | . |
| 0 Senior-Lok   | NA | . | BIOF .          | KEG(PID. | REACTOME_CELL_CYCLE;REACTO     |   |
| 0 .            | NA | . | .               | .        | .                              | . |



|                |    |   |      |      |       |       |      |                             |                              |                            |
|----------------|----|---|------|------|-------|-------|------|-----------------------------|------------------------------|----------------------------|
| 0 .            | NA | . | .    | .    | .     | .     | .    | .                           | .                            |                            |
| 0 .            | NA | . | .    | .    | .     | .     | .    | .                           | .                            |                            |
| 0 .            | NA | . | BIOF | ORG  | TRAI  | .     | PID  | BIO                         | .                            |                            |
| 0 .            | NA | . | .    | .    | .     | .     | .    | .                           | .                            |                            |
| 0 .            | NA | . | EST  | /    | ORG   | .     | .    | .                           | .                            |                            |
| 0 .            | NA | . | ACTI | ADH  | STRI  | .     | .    | REACTOME_MUSCLE_CONTRACTI   |                              |                            |
| 0 .            | NA | . | .    | .    | INTR  | CATI  | .    | .                           | REACTOME_DEGRADATION_OF_TH   |                            |
| 0 .            | NA | . | .    | .    | .     | .     | .    | .                           | .                            |                            |
| 0 .            | NA | . | .    | .    | .     | .     | .    | .                           | .                            |                            |
| 0 .            | NA | . | .    | .    | .     | .     | .    | .                           | .                            |                            |
| 0 .            | NA | . | .    | .    | .     | .     | .    | .                           | .                            |                            |
| 0 5-oxoprolir  | NA | . | .    | .    | .     | KEGC  | .    | REACTOME_BIOLOGICAL_OXIDATI |                              |                            |
| 0 .            | NA | . | .    | .    | .     | .     | .    | REACTOME_HIV_INFECTION;REAC |                              |                            |
| 0 .            | NA | . | .    | .    | .     | .     | .    | .                           | .                            |                            |
| 0 .            | NA | . | .    | .    | .     | .     | .    | .                           | .                            |                            |
| 0 .            | NA | . | .    | .    | .     | .     | .    | .                           | .                            |                            |
| 0 .            | NA | . | .    | .    | .     | .     | .    | .                           | .                            |                            |
| 0 .            | NA | . | .    | .    | .     | .     | .    | .                           | .                            |                            |
| 0 .            | NA | . | HOM  | CYT  | (IDEN | KEGC  | PID  | BIO                         | REACTOME_DEVELOPMENTAL_BIC   |                            |
| 0 .            | NA | . | .    | .    | .     | .     | .    | .                           | .                            |                            |
| 0 Pulmonary    | NA | . | .    | .    | .     | .     | PID  | .                           | .                            |                            |
| 0 Cowden sy    | NA | . | .    | .    | .     | .     | .    | .                           | .                            |                            |
| 0 .            | NA | . | .    | .    | .     | .     | .    | .                           | .                            |                            |
| 0 .            | NA | . | .    | .    | .     | .     | .    | REACTOME_O_LINKED_GLYCOSYL  |                              |                            |
| 0 .            | NA | . | .    | .    | .     | .     | .    | .                           | .                            |                            |
| 0 Diabetes r   | NA | . | EST  | /    | .     | CATI  | KEGC | PID                         | REACTOME_NEURONAL_SYSTEM;F   |                            |
| 0 Glycogen ε   | NA | . | .    | .    | CYT   | (OXIL | KEGC | PID                         | BIO                          | REACTOME_PYRUVATE_METABOLI |
| 0 Dystonia 2   | NA | . | .    | .    | .     | .     | .    | .                           | .                            |                            |
| 0 .            | NA | . | .    | .    | .     | .     | .    | .                           | .                            |                            |
| 0 .            | NA | . | .    | .    | .     | .     | .    | .                           | .                            |                            |
| 0 .            | NA | . | .    | .    | .     | .     | .    | .                           | .                            |                            |
| 0 .            | NA | . | .    | .    | .     | .     | .    | .                           | .                            |                            |
| 0 Asphyxiatir  | NA | . | ORG  | CYT  | (     | KEGC  | .    | REACTOME_MHC_CLASS_II_ANTIG |                              |                            |
| 0 .            | NA | . | .    | .    | .     | .     | .    | .                           | .                            |                            |
| 0 .            | NA | . | .    | .    | .     | .     | .    | REACTOME_TRANSMEMBRANE_TF   |                              |                            |
| 0 .            | NA | . | .    | .    | .     | .     | .    | .                           | .                            |                            |
| 0 .            | NA | . | .    | .    | .     | .     | .    | .                           | .                            |                            |
| 0 Methylmak    | NA | . | .    | .    | .     | KEGC  | .    | .                           | .                            |                            |
| 0 .            | NA | . | .    | .    | .     | .     | .    | .                           | .                            |                            |
| 0 .            | NA | . | .    | .    | .     | .     | .    | .                           | .                            |                            |
| 0 .            | NA | . | .    | .    | .     | .     | .    | .                           | .                            |                            |
| 0 .            | NA | . | .    | .    | .     | .     | .    | .                           | .                            |                            |
| 0 .            | NA | . | PRO  | INTR | CATI  | KEGC  | PID  | .                           | REACTOME_DEGRADATION_OF_TH   |                            |
| 0 Atrial septz | NA | . | REG  | ORG  | HYD   | KEGC  | .    | REACTOME_STRIATED_MUSCLE_C  |                              |                            |
| 0 .            | NA | . | .    | .    | .     | .     | .    | .                           | .                            |                            |
| 0 .            | NA | . | BIOF | CELI | NUC   | .     | .    | .                           | .                            |                            |
| 0 .            | NA | . | .    | .    | .     | .     | .    | .                           | .                            |                            |
| 0 Angelman     | NA | . | BIOF | .    | .     | KEGC  | PID  | BIO                         | REACTOME_IMMUNE_SYSTEM;REA   |                            |
| 0 .            | NA | . | SYS  | '    | .     | .     | .    | .                           | .                            |                            |
| 0 Colorectal   | NA | . | MIT  | ORG  | .     | KEGC  | PID  | .                           | REACTOME_INHIBITION_OF_THE_F |                            |
| 0 .            | NA | . | .    | .    | .     | .     | .    | .                           | .                            |                            |
| 0 .            | NA | . | .    | .    | .     | .     | .    | .                           | .                            |                            |
| 0 {Pseudoxa    | NA | . | BIO  | ξ    | .     | UDP   | KEGC | .                           | .                            |                            |

|                |    |   |                           |                   |                             |
|----------------|----|---|---------------------------|-------------------|-----------------------------|
| 0.             | NA | . | POS INTR REC KEGC.        | .                 | REACTOME_CELL_SURFACE_INTEI |
| 0.             | NA | . | SYS INTR REC KEGC(PID.BIO | .                 | REACTOME_CELL_SURFACE_INTEI |
| 0.             | NA | . | REG INTR CATI.            | .                 | REACTOME_TRANSMEMBRANE_TF   |
| 0.             | NA | . | MUL UBIACIC KEGC.         | .                 | .                           |
| 0.             | NA | . | .                         | .                 | .                           |
| 0.             | NA | . | POS INTRG_PI KEGC.        | .                 | REACTOME_SIGNALING_BY_GPCR  |
| 0.             | NA | . | .                         | MOT KEGC.         | .                           |
| 0.             | NA | . | .                         | .                 | .                           |
| 0 Alexander    | NA | . | ORG STRI.                 | .                 | REACTOME_SIGNALING_BY_ERBB4 |
| 0.             | NA | . | .                         | KEGC.             | REACTOME_ABCA_TRANSPORTER   |
| 0.             | NA | . | PRO ORG CHA.              | .                 | REACTOME_PROTEIN_FOLDING;RE |
| 0.             | NA | . | .                         | .                 | .                           |
| 0 [Blood gro   | NA | . | EST/INTR SUBI.            | .                 | REACTOME_TRANSMEMBRANE_TF   |
| 0.             | NA | . | .                         | .                 | .                           |
| 0.             | NA | . | .                         | .                 | .                           |
| 0.             | NA | . | .                         | .                 | .                           |
| 0.             | NA | . | INTRNUC KEGC.             | .                 | REACTOME_ABCA_TRANSPORTER   |
| 0.             | NA | . | .                         | .                 | .                           |
| 0.             | NA | . | .                         | .                 | .                           |
| 0.             | NA | . | INTRG_PI.                 | .                 | REACTOME_SIGNALING_BY_GPCR  |
| 0.             | NA | . | .                         | .                 | .                           |
| 0.             | NA | . | .                         | .                 | REACTOME_GENERIC_TRANSCRIP  |
| 0.             | NA | . | .                         | .                 | .                           |
| 0.             | NA | . | .                         | .                 | .                           |
| 0.             | NA | . | INTRCAR.                  | .                 | .                           |
| 0.             | NA | . | SIGN.                     | .                 | REACTOME_GASTRIN_CREB_SIGN  |
| 0.             | NA | . | .                         | .                 | REACTOME_DEVELOPMENTAL_BIC  |
| 0 Epileptic ei | NA | . | CYT(.                     | KEGC(PID.BIO      | REACTOME_GASTRIN_CREB_SIGN  |
| 0.             | NA | . | .                         | .                 | REACTOME_FACTORS_INVOLVED_  |
| 0.             | NA | . | .                         | .                 | .                           |
| 0.             | NA | . | .                         | .                 | .                           |
| 0.             | NA | . | .                         | .                 | .                           |
| 0.             | NA | . | CELI INTR.                | KEGC.             | .                           |
| 0.             | NA | . | .                         | .                 | .                           |
| 0.             | NA | . | EST/INTRCATI.             | .                 | .                           |
| 0.             | NA | . | .                         | CYT(.             | .                           |
| 0 Bethlem m    | NA | . | .                         | KEGC(PID.         | REACTOME_DEVELOPMENTAL_BIC  |
| 0.             | NA | . | .                         | .                 | .                           |
| 0.             | NA | . | .                         | .                 | .                           |
| 0.             | NA | . | .                         | .                 | .                           |
| 0.             | NA | . | INOF.                     | VOL.              | .                           |
| 0.             | NA | . | .                         | .                 | .                           |
| 0.             | NA | . | SIGN NON KINA.            | .                 | .                           |
| 0.             | NA | . | .                         | .                 | .                           |
| 0.             | NA | . | .                         | .                 | .                           |
| 0.             | NA | . | GLY(CYT( TRAI.            | .                 | .                           |
| 0.             | NA | . | .                         | .                 | .                           |
| 0.             | NA | . | .                         | .                 | .                           |
| 0.             | NA | . | .                         | .                 | .                           |
| 0.             | NA | . | PRO.                      | KINA KEGC(PID.BIO | REACTOME_SIGNALLING_BY_NGF; |
| 0.             | NA | . | .                         | .                 | .                           |
| 0.             | NA | . | .                         | .                 | .                           |

|                |    |   |                 |              |                             |                              |   |                            |   |
|----------------|----|---|-----------------|--------------|-----------------------------|------------------------------|---|----------------------------|---|
| 0 .            | NA | . | .               | .            | .                           | .                            | . | .                          | . |
| 0 .            | NA | . | EST/INTR.       | .            | .                           | .                            | . | REACTOME_MEMBRANE_TRAFFIC  |   |
| 0 Epileptic ei | NA | . | .               | TRAI         | KEGC.                       | .                            | . | REACTOME_O_LINKED_GLYCOSYL |   |
| 0 .            | NA | . | BIOF NUC PHO.   | .            | .                           | .                            | . |                            |   |
| 0 .            | NA | . | ENZ' INTR TRAI. | .            | .                           | .                            | . |                            |   |
| 0 .            | NA | . | .               | .            | KEGC(PID.BIO                | REACTOME_IL_7_SIGNALING;REAC |   |                            |   |
| 0 .            | NA | . | .               | .            | KEGC.                       | REACTOME_METABOLISM_OF_NUC   |   |                            |   |
| 0 .            | NA | . | .               | .            | .                           | .                            | . |                            |   |
| 0 .            | NA | . | .               | .            | .                           | .                            | . |                            |   |
| 0 .            | NA | . | .               | .            | .                           | .                            | . |                            |   |
| 0 .            | NA | . | .               | .            | .                           | .                            | . |                            |   |
| 0 .            | NA | . | BIOF CYT( PRO   | KEGC(PID.BIO | .                           | .                            | . |                            |   |
| 0 .            | NA | . | .               | .            | PID.                        | REACTOME_SIGNALING_BY_RHO_(  |   |                            |   |
| 0 Thrombocy    | NA | . | INTR.           | KEGC.        | REACTOME_METABOLISM_OF_AMI  |                              |   |                            |   |
| 0 Donnai-Ba    | NA | . | GLY(CYT(        | KEGC(PID.    | REACTOME_METABOLISM_OF_STE  |                              |   |                            |   |
| 0 .            | NA | . | .               | .            | .                           | .                            | . |                            |   |
| 0 .            | NA | . | CELI NUC NUC.   | .            | .                           | .                            | . |                            |   |
| 0 .            | NA | . | INTRG_PI.       | .            | .                           | .                            | . |                            |   |
| 0 .            | NA | . | .               | .            | .                           | .                            | . |                            |   |
| 0 .            | NA | . | .               | .            | .                           | REACTOME_EXTRACELLULAR_MA    |   |                            |   |
| 0 .            | NA | . | EST/INTR NUC    | KEGC.        | REACTOME_HYALURONAN_METAB   |                              |   |                            |   |
| 0 Night blind  | NA | . | DETI.           | KEGC(PID.    | REACTOME_CGMP_EFFECTS;REAC  |                              |   |                            |   |
| 0 .            | NA | . | .               | PHO.         | REACTOME_MEMBRANE_TRAFFIC   |                              |   |                            |   |
| 0 .            | NA | . | .               | .            | PID.                        | .                            |   |                            |   |
| 0 .            | NA | . | .               | .            | .                           | .                            | . |                            |   |
| 0 .            | NA | . | GLU' INTR.      | KEGC.        | .                           | .                            | . |                            |   |
| 0 .            | NA | . | .               | .            | KEGC.                       | REACTOME_SIGNALING_BY_GPCR   |   |                            |   |
| 0 .            | NA | . | .               | .            | .                           | .                            | . |                            |   |
| 0 .            | NA | . | SYS'            | KEGC.        | REACTOME_DEVELOPMENTAL_BIC  |                              |   |                            |   |
| 0 .            | NA | . | .               | .            | KEGC(PID.                   | REACTOME_SIGNALING_BY_RHO_(  |   |                            |   |
| 0 Adenoma,     | NA | . | NEG ORG KINA    | KEGC(PID.BIO | REACTOME_APOPTOTIC_CLEAVAG  |                              |   |                            |   |
| 0 .            | NA | . | .               | .            | .                           | .                            | . |                            |   |
| 0 .            | NA | . | .               | .            | .                           | REACTOME_DEVELOPMENTAL_BIC   |   |                            |   |
| 0 [Memory, ε   | NA | . | .               | .            | .                           | REACTOME_SIGNALING_BY_HIPPC  |   |                            |   |
| 0 .            | NA | . | .               | .            | .                           | .                            | . |                            |   |
| 0 .            | NA | . | RNA.            | TRAI.        | PID.                        | .                            | . |                            |   |
| 0 .            | NA | . | DNA.            | NUC          | KEGC.                       | REACTOME_ACTIVATION_OF_THE   |   |                            |   |
| 0 .            | NA | . | .               | .            | .                           | .                            | . |                            |   |
| 0 .            | NA | . | .               | .            | .                           | .                            | . |                            |   |
| 0 {Hypogona    | NA | . | EXTI.           | KEGC.        | REACTOME_DEVELOPMENTAL_BIC  |                              |   |                            |   |
| 0 {Osteoporc   | NA | . | REG.            | HOR          | KEGC.                       | .                            | . |                            |   |
| 0 .            | NA | . | .               | .            | .                           | .                            | . |                            |   |
| 0 .            | NA | . | .               | .            | .                           | .                            | . |                            |   |
| 0 .            | NA | . | .               | .            | .                           | .                            | . |                            |   |
| 0 Charcot-Mi   | NA | . | RES.            | .            | PID.                        | .                            | . |                            |   |
| 0 .            | NA | . | NUC TRAI.       | PID.         | REACTOME_RNA_POL_III_TRANSC |                              |   |                            |   |
| 0 Cardiomyo    | NA | . | MUS EXTI.       | .            | .                           | .                            | . |                            |   |
| 0 .            | NA | . | .               | .            | KEGC.                       | REACTOME_SIGNALING_BY_GPCR   |   |                            |   |
| 0 .            | NA | . | MUS CYT(ACTI.   | PID.         | .                           | .                            | . |                            |   |
| 0 .            | NA | . | .               | .            | .                           | .                            | . |                            |   |
| 0 .            | NA | . | .               | .            | .                           | .                            | . |                            |   |
| 0 .            | NA | . | .               | .            | .                           | .                            | . |                            |   |
| 0 .            | NA | . | SIG' NUC DNA.   | .            | .                           | REACTOME_PPARA_ACTIVATES_G   |   |                            |   |

|   |             |    |   |       |      |           |       |      |                                 |
|---|-------------|----|---|-------|------|-----------|-------|------|---------------------------------|
| 0 | Neurofibro: | NA | . | NUC   | NUC  | TRAI.     | .     | .    | .                               |
| 0 | .           | NA | . | .     | .    | .         | .     | .    | .                               |
| 0 | .           | NA | . | .     | .    | .         | .     | .    | .                               |
| 0 | .           | NA | . | .     | .    | .         | .     | .    | .                               |
| 0 | .           | NA | . | .     | .    | TRAI      | KEGC. | .    | REACTOME_O_LINKED_GLYCOSYL      |
| 0 | .           | NA | . | .     | .    | .         | .     | .    | .                               |
| 0 | .           | NA | . | .     | .    | .         | .     | .    | .                               |
| 0 | .           | NA | . | .     | .    | .         | .     | .    | .                               |
| 0 | .           | NA | . | SIG   | CYT  | CATI      | KEGC. | .    | REACTOME_SIGNALLING_BY_NGF;     |
| 0 | .           | NA | . | .     | .    | .         | .     | .    | .                               |
| 0 | .           | NA | . | .     | .    | PHO       | KEGC. | .    | .                               |
| 0 | .           | NA | . | RNA   | .    | TRAI.     | .     | .    | REACTOME_INTEGRATION_OF_EN      |
| 0 | .           | NA | . | .     | .    | .         | .     | .    | .                               |
| 0 | .           | NA | . | .     | .    | MRN.      | PID.  | .    | REACTOME_METABOLISM_OF_MRI      |
| 0 | .           | NA | . | .     | .    | .         | .     | .    | .                               |
| 0 | {Epilepsy,  | NA | . | MUS   | MEM  | CATI      | KEGC. | .    | REACTOME_DEVELOPMENTAL_BIC      |
| 0 | .           | NA | . | BIOF. | .    | NUC.      | .     | .    | .                               |
| 0 | .           | NA | . | .     | .    | .         | .     | .    | .                               |
| 0 | .           | NA | . | .     | .    | .         | .     | .    | .                               |
| 0 | .           | NA | . | .     | .    | INTRG_PI. | .     | .    | .                               |
| 0 | .           | NA | . | MUS   | PRO. | .         | KEGC. | .    | REACTOME_EXTRACELLULAR_MAT      |
| 0 | .           | NA | . | .     | .    | .         | .     | .    | .                               |
| 0 | .           | NA | . | .     | .    | .         | .     | .    | .                               |
| 0 | .           | NA | . | .     | .    | .         | PID.  | .    | REACTOME_REGULATION_OF_HYF      |
| 0 | .           | NA | . | .     | .    | .         | .     | .    | .                               |
| 0 | .           | NA | . | .     | .    | .         | .     | .    | .                               |
| 0 | .           | NA | . | .     | .    | .         | .     | .    | .                               |
| 0 | .           | NA | . | .     | .    | .         | .     | .    | .                               |
| 0 | .           | NA | . | .     | .    | .         | .     | .    | .                               |
| 0 | .           | NA | . | .     | .    | CELI      | PRO.  | .    | .                               |
| 0 | .           | NA | . | MAC.  | .    | .         | .     | .    | BIO REACTOME_TRANSLATION;REACTO |
| 0 | .           | NA | . | .     | .    | .         | .     | .    | .                               |
| 0 | .           | NA | . | BIOF. | .    | .         | KEGC. | BIO. | .                               |
| 0 | Mental retz | NA | . | .     | .    | .         | .     | .    | .                               |
| 0 | .           | NA | . | .     | .    | .         | PID.  | .    | .                               |
| 0 | .           | NA | . | RNA   | .    | TRAI.     | .     | .    | .                               |
| 0 | .           | NA | . | .     | .    | .         | .     | .    | .                               |
| 0 | Congenital  | NA | . | CI97  | PAT  | .         | .     | .    | .                               |
| 0 | Hemophiliz  | NA | . | REG.  | .    | .         | KEGC. | BIO  | REACTOME_RESPONSE_TO_ELEV)      |
| 0 | .           | NA | . | .     | .    | .         | .     | .    | .                               |
| 0 | .           | NA | . | .     | .    | .         | .     | .    | .                               |



AMINS\_AND\_COFACTORS

RIPTION;REACTOME\_RNA\_POL\_II\_TRANSCRIPTION\_PRE\_INITIATION\_AND\_PROMOTER\_OPENING;  
PED\_INTRON\_CONTAINING\_PRE\_MRNA;REACTOME\_MRNA\_PROCESSING;REACTOME\_MRN  
ONS;REACTOME\_CYTOCHROME\_P450\_ARRANGED\_BY\_SUBSTRATE\_TYPE;REACTOME\_PHA  
BOLISM;REACTOME\_SYNTHESIS\_OF\_PE;REACTOME\_SYNTHESIS\_OF\_PC;REACTOME\_GLYC

'\_INTERACTIONS\_BETWEEN\_A\_LYMPHOID\_AND\_A\_NON\_LYMPHOID\_CELL;REACTOME\_IMMUNE  
RIPTION;REACTOME\_TRANSCRIPTION;REACTOME\_RNA\_POL\_I\_RNA\_POL\_III\_AND\_MITOCHONDR  
DS\_AND\_LIPOPROTEINS;REACTOME\_CHOLESTEROL\_BIOSYNTHESIS

:ACTOME\_IL1\_SIGNALING;REACTOME\_IMMUNE\_SYSTEM;REACTOME\_CYTOKINE\_SIGNALING

PROTEINS;REACTOME\_POST\_TRANSLATIONAL\_PROTEIN\_MODIFICATION;REACTOME\_ASPARA

GLUTAMATE\_AMINOACYLATION;REACTOME\_TRNA\_AMINOACYLATION

;REACTOME\_CLASS\_B\_2\_SECRETIN\_FAMILY\_RECEPTORS;REACTOME\_GPCR\_DOWNSTREA

CHLORIDE\_TRANSPORT;REACTOME\_YAP1\_AND\_WWTR1\_TAZ\_STIMULATED\_GENE\_EXP

RESISTANCE\_TO\_CODING\_RNA;REACTOME\_ANTIVIRAL\_MECHANISM\_BY\_IFN\_STIMULATED\_GENES;REACTO

REACTOME\_DAG\_AND\_IP3\_SIGNALING;REACTOME\_SIGNALING\_BY\_ERBB2;REACTOME\_SIG  
REACTOME\_SIGNALLING\_BY\_NGF;REACTOME\_CTNNB1\_PHOSPHORYLATION\_CASCADE;REA

CTIONS;REACTOME\_GLUTATHIONE\_CONJUGATION;REACTOME\_PHASE\_II\_CONJUGATION

TRANSPORT\_OF\_SMALL\_MOLECULES;REACTOME\_SLC\_MEDIATED\_TRANSMEMBRANE\_TRAN

OME\_FORMATION\_OF\_THE\_TERNARY\_COMPLEX\_AND\_SUBSEQUENTLY\_THE\_43S\_COMPLE

CELL\_CYCLE;REACTOME\_CHROMOSOME\_MAINTENANCE;REACTOME\_MEIOTIC\_SYNAPSIS;F

NO\_ACIDS\_AND\_DERIVATIVES;REACTOME\_AMINE\_DERIVED\_HORMONES

\_AND\_TARGETTING\_OF\_GAG\_PROTEINS;REACTOME\_HIV\_INFECTIION;REACTOME\_HIV\_LIFE.

ICATION;REACTOME\_EXTRACELLULAR\_MATRIX\_ORGANIZATION;REACTOME\_COLLAGEN\_FC

REACTOME\_TRIF\_MEDIATED\_TLR3\_SIGNALING;REACTOME\_TCR\_SIGNALING;REACTOME\_D

;REACTOME\_OLFACTORY\_SIGNALING\_PATHWAY;REACTOME\_GPCR\_DOWNSTREAM\_SIGNA

SS\_CHEMICAL\_SYNAPSES;REACTOME\_NEURONAL\_SYSTEM;REACTOME\_AMINO\_ACID\_TRA

.TE\_BIOSYNTHESIS;REACTOME\_CHONDROITIN\_SULFATE\_DERMATAN\_SULFATE\_METABOLI

CELL\_CYCLE;REACTOME\_CHROMOSOME\_MAINTENANCE;REACTOME\_MEIOTIC\_SYNOPSIS

TRANSPORT\_OF\_SMALL\_MOLECULES;REACTOME\_ION\_TRANSPORT\_BY\_P\_TYPE\_ATPASES;R

;REACTOME\_GPCR\_DOWNSTREAM\_SIGNALING;REACTOME\_G\_ALPHA\_I\_SIGNALLING\_EVEN

SPED\_INTRON\_CONTAINING\_PRE\_MRNA;REACTOME\_MRNA\_PROCESSING;REACTOME\_MR

ME\_CELL\_CYCLE\_MITOTIC;REACTOME\_RECRUITMENT\_OF\_MITOTIC\_CENTROSOME\_PROTEI

REACTOME\_DAG\_AND\_IP3\_SIGNALING;REACTOME\_SIGNALING\_BY\_ERBB2;REACTOME\_SIG

ONS;REACTOME\_XENOBIOTICS;REACTOME\_CYTOCHROME\_P450\_ARRANGED\_BY\_SUBSTR

ONS;REACTOME\_GLUTATHIONE\_CONJUGATION;REACTOME\_PHASE\_II\_CONJUGATION

3;REACTOME\_ACTIVATION\_OF\_CHAPERONE\_GENES\_BY\_XBP1S;REACTOME\_UNFOLDED\_PROTEIN\_FOLDING\_PATHWAY;REACTOME\_NUCLEAR\_RECEPTOR\_TRANSCRIPTION\_PATHWAY

NON\_CODING\_TRANSCRIPTS;REACTOME\_PROCESSING\_OF\_CAPPED\_INTRON\_CONTAINING\_PRECURSOR\_MRNAS;REACTOME\_HEPARAN\_SULFATE\_HEPARIN\_HS\_GAG\_METABOLISM;REACTOME\_GLYCOXYLATION;REACTOME\_GTPASES;REACTOME\_SIGNALLING\_BY\_NGF;REACTOME\_NRAGE\_SIGNALS\_DEATH\_THROUGHOUT\_CELL\_CYCLE

REACTOME\_SIGNALING\_BY\_SCF\_KIT;REACTOME\_SIGNALING\_BY\_ERBB4;REACTOME\_SIGNALLING\_BY\_SCF\_KIT;REACTOME\_SIGNALING\_BY\_ERBB4;REACTOME\_SIGNALLING\_BY\_SCF\_KIT;REACTOME\_SIGNALING\_BY\_ERBB4;REACTOME\_SIGNALLING\_BY\_SCF\_KIT;REACTOME\_SIGNALING\_BY\_ERBB4

PRE\_REPLICATIVE\_COMPLEX;REACTOME\_CELL\_CYCLE;REACTOME\_ORC1\_REMOVAL\_FROM\_CHROMOSOMES

REACTOME\_VOLTAGE\_GATED\_POTASSIUM\_CHANNELS;REACTOME\_POTASSIUM\_CHANNEL\_BLOCKERS

;REACTOME\_GPCR\_DOWNSTREAM\_SIGNALING;REACTOME\_G\_ALPHA\_I\_SIGNALLING\_EVENTS;REACTOME\_BMAL1\_CLOCK\_NPAS2\_ACTIVATES\_CIRCADIAN\_EXPRESSION;REACTOME

CELL\_CELL\_COMMUNICATION;REACTOME\_CELL\_EXTRACELLULAR\_MATRIX\_INTERACTIONS;REACTOME\_CELL\_JUNCTIONS

NUCLEOTIDES;REACTOME\_PURINE\_RIBONUCLEOSIDE\_MONOPHOSPHATE\_BIOSYNTHESIS;REACTOME\_GTPASES;REACTOME\_EXTRACELLULAR\_MATRIX\_ORGANIZATION;REACTOME\_COLLAGEN\_FOLDING;REACTOME\_SIGNALLING\_BY\_NGF;REACTOME\_NRAGE\_SIGNALS\_DEATH\_THROUGH\_TAUROKINASE

REACTOME\_SIGNALING\_BY\_SCF\_KIT;REACTOME\_CELL\_CELL\_COMMUNICATION;REACTOME\_CELL\_CELL\_COMMUNICATION\_IN\_MEGAKARYOCYTE\_DEVELOPMENT\_AND\_PLATELET\_PRODUCTION;REACTOME\_HEMOSTASIS

PHASE1\_FUNCTIONALIZATION\_OF\_COMPOUNDS;REACTOME\_ETHANOL\_CATABOLISM



IN\_MEGAKARYOCYTE\_DEVELOPMENT\_AND\_PLATELET\_PRODUCTION;REACTOME\_HEMOSTASIS;  
RIPTION\_AND\_TRANSLATION;REACTOME\_PRE\_NOTCH\_EXPRESSION\_AND\_PROCESSING;R

REACTOME\_TANDEM\_PORE\_DOMAIN\_POTASSIUM\_CHANNELS;REACTOME\_POTASSIUM\_CHANNEL  
TE\_DERMATAN\_SULFATE\_METABOLISM;REACTOME\_GLYCOSAMINOGLYCAN\_METABOLISM

TRANSPORT\_OF\_SMALL\_MOLECULES;REACTOME\_SLC\_MEDIATED\_TRANSMEMBRANE\_TRANSPORT

ING;REACTOME\_MEMBRANE\_BINDING\_AND\_TARGETTING\_OF\_GAG\_PROTEINS;REACTOME

TRANSPORT\_OF\_SMALL\_MOLECULES;REACTOME\_SLC\_MEDIATED\_TRANSMEMBRANE\_TRANSPORT

REACTOME\_SIGNALLING\_TO\_RAS;REACTOME\_NGF\_SIGNALLING\_VIA\_TRKA\_FROM\_THE\_PLATELET

MISS\_CHEMICAL\_SYNAPSES;REACTOME\_NEURONAL\_SYSTEM  
:ROID\_HORMONES\_AND\_VITAMINS\_A\_AND\_D;REACTOME\_HDL\_MEDIATED\_LIPID\_TRANSPOR

ROTEIN\_IMPORT;REACTOME\_METABOLISM\_OF\_PROTEINS

TRANSPORT\_OF\_SMALL\_MOLECULES;REACTOME\_AQUAPORIN\_MEDIATED\_TRANSPORT;REA

ATION\_OF\_MUCINS;REACTOME\_TERMINATION\_OF\_O\_GLYCAN\_BIOSYNTHESIS;REACTOME  
ATION\_OF\_MUCINS;REACTOME\_TERMINATION\_OF\_O\_GLYCAN\_BIOSYNTHESIS;REACTOME

SIS;REACTOME\_HEPARAN\_SULFATE\_HEPARIN\_HS\_GAG\_METABOLISM;REACTOME\_GLYCOS

TOR\_INTERACTIONS;REACTOME\_RESPONSE\_TO\_ELEVATED\_PLATELET\_CYTOSOLIC\_CA2\_  
3;REACTOME\_ACTIVATION\_OF\_CHAPERONE\_GENES\_BY\_XBP1S;REACTOME\_UNFOLDED\_P  
EN\_PRESENTATION;REACTOME\_FACTORS\_INVOLVED\_IN\_MEGAKARYOCYTE\_DEVELOPME

GTPASES

GTPASES

;REACTOME\_OLFACTORY\_SIGNALING\_PATHWAY;REACTOME\_GPCR\_DOWNSTREAM\_SIGNA

OF\_HOMO\_SAPIENS\_WITH\_MYCOBACTERIUM\_TUBERCULOSIS;REACTOME\_NITRIC\_OXIDE\_S  
OLOGY;REACTOME\_NOTCH1\_INTRACELLULAR\_DOMAIN\_REGULATES\_TRANSCRIPTION;REA  
SIGNALING;REACTOME\_RIP\_MEDIATED\_NFKB\_ACTIVATION\_VIA\_DAI;REACTOME\_APOPTO

ACTOME\_ADAPTIVE\_IMMUNE\_SYSTEM;REACTOME\_CLASS\_I\_MHC\_MEDIATED\_ANTIGEN\_PRO

;REACTOME\_OLFACTORY\_SIGNALING\_PATHWAY;REACTOME\_GPCR\_DOWNSTREAM\_SIGNA

TRANSPORT\_OF\_SMALL\_MOLECULES;REACTOME\_SLC\_MEDIATED\_TRANSMEMBRANE\_TRAN:

MOLOGY;REACTOME\_AXON\_GUIDANCE;REACTOME\_MYOGENESIS;REACTOME\_NETRIN1\_SIGN

TRANSPORT\_OF\_SMALL\_MOLECULES;REACTOME\_SLC\_MEDIATED\_TRANSMEMBRANE\_TRAN:

BETA\_SIGNALING;REACTOME\_INTERFERON\_SIGNALING;REACTOME\_IMMUNE\_SYSTEM;RE/ICATION;REACTOME\_CELL\_CELL\_JUNCTION\_ORGANIZATION;REACTOME\_TIGHT\_JUNCTION

REACTOME\_POST\_CHAPERONIN\_TUBULIN\_FOLDING\_PATHWAY;REACTOME\_METABOLISM\_O

NO\_ACIDS\_AND\_DERIVATIVES

TRANSMITTER\_RELEASE\_CYCLE;REACTOME\_TRANSMISSION\_ACROSS\_CHEMICAL\_SYNAPS

;REACTOME\_PEPTIDE\_LIGAND\_BINDING\_RECEPTORS;REACTOME\_CLASS\_A1\_RHODOPSIN\_

ONS;REACTOME\_PHASE1\_FUNCTIONALIZATION\_OF\_COMPOUNDS;REACTOME\_ETHANOL\_C  
ONS;REACTOME\_PHASE1\_FUNCTIONALIZATION\_OF\_COMPOUNDS;REACTOME\_ETHANOL\_C

LOGY;REACTOME\_PPARA\_ACTIVATES\_GENE\_EXPRESSION;REACTOME\_GENERIC\_TRANSC

LOGY;REACTOME\_AXON\_GUIDANCE;REACTOME\_L1CAM\_INTERACTIONS  
GTPASES;REACTOME\_MEMBRANE\_TRAFFICKING;REACTOME\_TRANS\_GOLGI\_NETWORK\_VI

ACTOME\_ADAPTIVE\_IMMUNE\_SYSTEM;REACTOME\_CLASS\_I\_MHC\_MEDIATED\_ANTIGEN\_PRC

LOGY;REACTOME\_SIGNALING\_BY\_NODAL  
;REACTOME\_OLFACTORY\_SIGNALING\_PATHWAY;REACTOME\_GPCR\_DOWNSTREAM\_SIGNA

LEOTIDES;REACTOME\_PURINE\_RIBONUCLEOSIDE\_MONOPHOSPHATE\_BIOSYNTHESIS;RE/

.IN\_MEGAKARYOCYTE\_DEVELOPMENT\_AND\_PLATELET\_PRODUCTION;REACTOME\_KINESIN  
.IN\_MEGAKARYOCYTE\_DEVELOPMENT\_AND\_PLATELET\_PRODUCTION;REACTOME\_KINESIN  
)SS\_CHEMICAL\_SYNAPSES;REACTOME\_NEURONAL\_SYSTEM

LOGY;REACTOME\_AXON\_GUIDANCE;REACTOME\_SIGNALING\_BY\_ROBO\_RECEPTOR  
BOLISM;REACTOME\_GASTRIN\_CREB\_SIGNALLING\_PATHWAY\_VIA\_PKC\_AND\_MAPK;REACTO

REACTOME\_SIGNALING\_BY\_SCF\_KIT;REACTOME\_CELL\_CELL\_COMMUNICATION;REACTOM  
REACTOME\_SIGNALING\_BY\_SCF\_KIT;REACTOME\_CELL\_CELL\_COMMUNICATION;REACTOM

ALLING\_PATHWAY\_VIA\_PKC\_AND\_MAPK;REACTOME\_SIGNALING\_BY\_GPCR;REACTOME\_PE

IG\_CROSS\_PRESENTATION;REACTOME\_ENDOSOMAL\_VACUOLAR\_PATHWAY;REACTOME\_E  
.IPTION;REACTOME\_TRANSCRIPTION;REACTOME\_RNA\_POL\_I\_RNA\_POL\_III\_AND\_MITOCHOI  
TION\_PATHWAY;REACTOME\_NUCLEAR\_RECEPTOR\_TRANSCRIPTION\_PATHWAY  
ENE\_EXPRESSION;REACTOME\_METABOLISM\_OF\_LIPIDS\_AND\_LIPOPROTEINS;REACTOME\_  
ONS;REACTOME\_GLUTATHIONE\_CONJUGATION;REACTOME\_PHASE\_II\_CONJUGATION  
TRIX\_ORGANIZATION;REACTOME\_COLLAGEN\_FORMATION

LOGY;REACTOME\_REGULATION\_OF\_BETA\_CELL\_DEVELOPMENT;REACTOME\_REGULATION

SS\_CHEMICAL\_SYNAPSES;REACTOME\_NEURONAL\_SYSTEM;REACTOME\_SIGNALING\_BY\_G  
ISM\_AND\_CITRIC\_ACID\_TCA\_CYCLE;REACTOME\_TCA\_CYCLE\_AND\_RESPIRATORY\_ELECTR

RACTIONS\_AT\_THE\_VASCULAR\_WALL;REACTOME\_TIE2\_SIGNALING;REACTOME\_HEMOSTA:

TRANSPORT\_OF\_SMALL\_MOLECULES;REACTOME\_SLC\_MEDIATED\_TRANSMEMBRANE\_TRAN:

LOGY;REACTOME\_NEURONAL\_SYSTEM;REACTOME\_AXON\_GUIDANCE;REACTOME\_L1CAM

TRANSPORT\_OF\_SMALL\_MOLECULES;REACTOME\_SLC\_MEDIATED\_TRANSMEMBRANE\_TRAN

BIOLOGY;REACTOME\_TRANSMISSION\_ACROSS\_CHEMICAL\_SYNAPSES;REACTOME\_NEURONA

ATED\_PLATELET\_CYTOSOLIC\_CA2\_;REACTOME\_MUSCLE\_CONTRACTION;REACTOME\_SMO

TRANSPORT\_OF\_SMALL\_MOLECULES;REACTOME\_AQUAPORIN\_MEDIATED\_TRANSPORT;REA

REACTOME\_SIGNALING\_BY\_SCF\_KIT;REACTOME\_DEVELOPMENTAL\_BIOLOGY;REACTOME\_  
REACTOME\_DAG\_AND\_IP3\_SIGNALING;REACTOME\_SIGNALING\_BY\_ERBB2;REACTOME\_SIG  
3;REACTOME\_ACTIVATION\_OF\_CHAPERONE\_GENES\_BY\_XBP1S;REACTOME\_UNFOLDED\_PF

ING;REACTOME\_TRANS\_GOLGI\_NETWORK\_VESICLE\_BUDDING;REACTOME\_GOLGI\_ASSOC



ISS\_CHEMICAL\_SYNAPSES;REACTOME\_NEURONAL\_SYSTEM;REACTOME\_NEUROTRANSMIT

ISM\_AND\_CITRIC\_ACID\_TCA\_CYCLE;REACTOME\_TCA\_CYCLE\_AND\_RESPIRATORY\_ELECTR

THWAY;REACTOME\_DNA\_REPAIR

ALLING\_PATHWAY\_VIA\_PKC\_AND\_MAPK;REACTOME\_SIGNALING\_BY\_GPCR;REACTOME\_IN  
HENATE\_METABOLISM;REACTOME\_METABOLISM\_OF\_VITAMINS\_AND\_COFACTORS;REACTC

3;REACTOME\_PERK\_REGULATED\_GENE\_EXPRESSION;REACTOME\_ACTIVATION\_OF\_GENES  
IPLED\_NER\_TC\_NER;REACTOME\_NUCLEOTIDE\_EXCISION\_REPAIR;REACTOME\_FORMATION  
)TEIN\_IMPORT;REACTOME\_METABOLISM\_OF\_PROTEINS

)LOGY;REACTOME\_AXON\_GUIDANCE;REACTOME\_NCAM\_SIGNALING\_FOR\_NEURITE\_OUT\_C  
3;REACTOME\_PERK\_REGULATED\_GENE\_EXPRESSION;REACTOME\_ACTIVATION\_OF\_GENES

ELLING\_OF\_PI;REACTOME\_ACYL\_CHAIN\_REMODELLING\_OF\_PC;REACTOME\_PHOSPHOLIPID  
NO\_ACIDS\_AND\_DERIVATIVES;REACTOME\_GLYCOPROTEIN\_HORMONES;REACTOME\_PEPT

REACTOME\_DAG\_AND\_IP3\_SIGNALING;REACTOME\_SIGNALING\_BY\_ERBB2;REACTOME\_SIG  
'TION\_PATHWAY

\_PRE\_REPLICATIVE\_COMPLEX;REACTOME\_CELL\_CYCLE;REACTOME\_ORC1\_REMOVAL\_FRC

)TOME\_GENERATION\_OF\_SECOND\_MESSENGER\_MOLECULES;REACTOME\_IMMUNE\_SYSTE

)  
ATION\_OF\_MUCINS;REACTOME\_METABOLISM\_OF\_PROTEINS;REACTOME\_POST\_TRANSLA  
GTPASES;REACTOME\_SIGNALLING\_BY\_NGF;REACTOME\_NRAGE\_SIGNALS\_DEATH\_THROU  
DS\_AND\_LIPOPROTEINS;REACTOME\_CHOLESTEROL\_BIOSYNTHESIS

ACTOME\_ADAPTIVE\_IMMUNE\_SYSTEM;REACTOME\_CLASS\_I\_MHC\_MEDIATED\_ANTIGEN\_PRO

TRIX\_ORGANIZATION;REACTOME\_COLLAGEN\_FORMATION

ICATION;REACTOME\_CELL\_CELL\_JUNCTION\_ORGANIZATION;REACTOME\_TIGHT\_JUNCTION

VS\_MEDIATED\_TRANSPORT;REACTOME\_TRANSMEMBRANE\_TRANSPORT\_OF\_SMALL\_MOLE

ON\_OF\_SOLUBLE\_EXOGENOUS\_ANTIGENS\_ENDOSOMES;REACTOME\_ANTIGEN\_PROCESSING

GTPASES;REACTOME\_SIGNALLING\_BY\_NGF;REACTOME\_NRAGE\_SIGNALS\_DEATH\_THROU

GTPASES;REACTOME\_SIGNALLING\_BY\_NGF;REACTOME\_NRAGE\_SIGNALS\_DEATH\_THROU

.IPTION\_TERMINATION;REACTOME\_RNA\_POL\_I\_TRANSCRIPTION;REACTOME\_TRANSCRIPTI

CLEOTIDES;REACTOME\_PYRIMIDINE\_METABOLISM

ORT\_ACROSS\_THE\_PLASMA\_MEMBRANE;REACTOME\_TRANSMEMBRANE\_TRANSPORT\_OF\_  
ORT\_ACROSS\_THE\_PLASMA\_MEMBRANE;REACTOME\_TRANSMEMBRANE\_TRANSPORT\_OF\_  
GTPASES

GTPASES

TRANSPORT\_OF\_SMALL\_MOLECULES;REACTOME\_SLC\_MEDIATED\_TRANSMEMBRANE\_TRAN

.IPTION\_TERMINATION;REACTOME\_RNA\_POL\_I\_TRANSCRIPTION;REACTOME\_TRANSCRIPTI

RIPTION\_INITIATION\_FROM\_TYPE\_2\_PROMOTER;REACTOME\_RNA\_POL\_III\_TRANSCRIPTION  
NO\_ACIDS\_AND\_DERIVATIVES

ILAR\_DOMAIN\_REGULATES\_TRANSCRIPTION;REACTOME\_SIGNALING\_BY\_NOTCH1;REACTO  
\_IN\_MEGAKARYOCYTE\_DEVELOPMENT\_AND\_PLATELET\_PRODUCTION;REACTOME\_HEMOST

;REACTOME\_CLASS\_B\_2\_SECRETIN\_FAMILY\_RECEPTORS;REACTOME\_GPCR\_LIGAND\_BIN

AIR;REACTOME\_RESOLUTION\_OF\_AP\_SITES\_VIA\_THE\_MULTIPLE\_NUCLEOTIDE\_PATCH\_RE  
AIR;REACTOME\_RESOLUTION\_OF\_AP\_SITES\_VIA\_THE\_MULTIPLE\_NUCLEOTIDE\_PATCH\_RE

TRANSPORT\_OF\_SMALL\_MOLECULES;REACTOME\_ION\_TRANSPORT\_BY\_P\_TYPE\_ATPASES;R

CELL\_CYCLE;REACTOME\_CELL\_CYCLE\_CHECKPOINTS;REACTOME\_REGULATION\_OF\_THE\_  
;REACTOME\_CLASS\_A1\_RHODOPSIN\_LIKE\_RECEPTORS;REACTOME\_P2Y\_RECEPTORS;REA

MOLOGY;REACTOME\_REGULATION\_OF\_BETA\_CELL\_DEVELOPMENT;REACTOME\_REGULATION

ME\_CELL\_CYCLE\_MITOTIC;REACTOME\_CELL\_CYCLE\_CHECKPOINTS;REACTOME\_TRANSCR

'TION\_PATHWAY

TRANSPORT\_OF\_SMALL\_MOLECULES;REACTOME\_SLC\_MEDIATED\_TRANSMEMBRANE\_TRAN:  
MOLOGY;REACTOME\_BMAL1\_CLOCK\_NPAS2\_ACTIVATES\_CIRCADIAN\_EXPRESSION;REACTOM

TRIX\_ORGANIZATION;REACTOME\_COLLAGEN\_FORMATION

LATES\_GUANYLATE\_CYCLASE;REACTOME\_PLATELET\_HOMEOSTASIS;REACTOME\_HEMOST

\_RECEPTOR\_SIGNALING;REACTOME\_SIGNALING\_BY\_ERBB4;REACTOME\_PROLACTIN\_RECE

.IPTION\_TERMINATION;REACTOME\_RNA\_POL\_I\_TRANSCRIPTION;REACTOME\_RNA\_POL\_II\_T

\_METABOLISM;REACTOME\_PHOSPHOLIPID\_METABOLISM;REACTOME\_CS\_DS\_DEGRADATIO  
\_METABOLISM;REACTOME\_PHOSPHOLIPID\_METABOLISM;REACTOME\_CS\_DS\_DEGRADATIO  
\_SALT\_METABOLISM;REACTOME\_SYNTHESIS\_OF\_BILE\_ACIDS\_AND\_BILE\_SALTS\_VIA\_7ALP  
MINOACYLATION;REACTOME\_TRNA\_AMINOACYLATION  
MINOACYLATION;REACTOME\_TRNA\_AMINOACYLATION

TRANSPORT\_OF\_SMALL\_MOLECULES;REACTOME\_ION\_CHANNEL\_TRANSPORT;REACTOME\_L

BIOLOGY;REACTOME\_TRANSCRIPTIONAL\_REGULATION\_OF\_WHITE\_ADIPOCYTE\_DIFFERENTI/

CELL\_CYCLE;REACTOME\_RNA\_POL\_I\_TRANSCRIPTION;REACTOME\_TRANSCRIPTION;REAC

\_FOR\_APOPTOSIS;REACTOME\_DEVELOPMENTAL\_BIOLOGY;REACTOME\_TRANSCRIPTIONAL

:ROID\_HORMONES\_AND\_VITAMINS\_A\_AND\_D;REACTOME\_BIOLOGICAL\_OXIDATIONS;REACT

IA\_AMINOACYLATION;REACTOME\_TRNA\_AMINOACYLATION

IE\_BETA\_DEFENSINS;REACTOME\_INNATE\_IMMUNE\_SYSTEM;REACTOME\_IMMUNE\_SYSTEM

ATION\_OF\_MUCINS;REACTOME\_METABOLISM\_OF\_PROTEINS;REACTOME\_POST\_TRANSLA

\_B\_CELL\_RECEPTOR\_LEADING\_TO\_GENERATION\_OF\_SECOND\_MESSENGERS;REACTOME\_

ING;REACTOME\_ENDOSOMAL\_SORTING\_COMPLEX\_REQUIRED\_FOR\_TRANSPORT\_ESCRT  
4;REACTOME\_DOWNREGULATION\_OF\_ERBB2\_ERBB3\_SIGNALING;REACTOME\_SIGNALING\_I

RECYCLING;REACTOME\_NEF\_MEDIATES\_DOWN\_MODULATION\_OF\_CELL\_SURFACE\_RECEF  
CELL\_CYCLE;REACTOME\_CHROMOSOME\_MAINTENANCE;REACTOME\_MEIOTIC\_SYNAPSIS;F  
ILAR\_DOMAIN\_REGULATES\_TRANSCRIPTION;REACTOME\_SIGNALING\_BY\_NOTCH1;REACTO

7\_ACTIVATION;REACTOME\_FACTORS\_INVOLVED\_IN\_MEGAKARYOCYTE\_DEVELOPMENT\_A

ILAR\_DOMAIN\_REGULATES\_TRANSCRIPTION;REACTOME\_SIGNALING\_BY\_NOTCH1;REACTO

REACTOME\_ARMS\_MEDIATED\_ACTIVATION;REACTOME\_PROLONGED\_ERK\_ACTIVATION\_E'

VA;REACTOME\_METABOLISM\_OF\_RNA;REACTOME\_NONSENSE\_MEDIATED\_DECAY\_ENHAN

LOGY;REACTOME\_REGULATION\_OF\_APOPTOSIS;REACTOME\_AXON\_GUIDANCE;REACTOMI  
LOGY;REACTOME\_REGULATION\_OF\_APOPTOSIS;REACTOME\_AXON\_GUIDANCE;REACTOMI

EN\_PRESENTATION;REACTOME\_FACTORS\_INVOLVED\_IN\_MEGAKARYOCYTE\_DEVELOPME

ATION\_OF\_MUCINS;REACTOME\_TERMINATION\_OF\_O\_GLYCAN\_BIOSYNTHESIS;REACTOME

'TOR\_INTERACTIONS;REACTOME\_RESPONSE\_TO\_ELEVATED\_PLATELET\_CYTOSOLIC\_CA2\_



LOGY;REACTOME\_AXON\_GUIDANCE;REACTOME\_NCAM1\_INTERACTIONS;REACTOME\_NCA

ME\_GLUCONEOGENESIS;REACTOME\_METABOLISM\_OF\_CARBOHYDRATES;REACTOME\_GLU  
ME\_GLUCONEOGENESIS;REACTOME\_METABOLISM\_OF\_CARBOHYDRATES;REACTOME\_GLU  
CKING;REACTOME\_TRANS\_GOLGI\_NETWORK\_VESICLE\_BUDDING;REACTOME\_GOLGI\_ASSOC  
S;REACTOME\_ACTIVATION\_OF\_CHAPERONE\_GENES\_BY\_XBP1S;REACTOME\_UNFOLDED\_PF

:ROID\_HORMONES\_AND\_VITAMINS\_A\_AND\_D;REACTOME\_BIOLOGICAL\_OXIDATIONS;REACT  
:ROID\_HORMONES\_AND\_VITAMINS\_A\_AND\_D;REACTOME\_BIOLOGICAL\_OXIDATIONS;REACT

:ONTRACTION;REACTOME\_MUSCLE\_CONTRACTION

LOGY;REACTOME\_PPARA\_ACTIVATES\_GENE\_EXPRESSION;REACTOME\_METABOLISM\_OF\_  
ELLING\_OF\_PI;REACTOME\_ACYL\_CHAIN\_REMODELLING\_OF\_PC;REACTOME\_PHOSPHOLIPIE

.IN\_MEGAKARYOCYTE\_DEVELOPMENT\_AND\_PLATELET\_PRODUCTION;REACTOME\_HEMOS

RIN\_BH4\_SYNTHESIS\_RECYCLING\_SALVAGE\_AND\_REGULATION;REACTOME\_ENOS\_ACTIVA

ME\_CELL\_CYCLE\_MITOTIC;REACTOME\_CYCLIN\_E\_ASSOCIATED\_EVENTS\_DURING\_G1\_S\_T  
ME\_CELL\_CYCLE\_MITOTIC;REACTOME\_CYCLIN\_E\_ASSOCIATED\_EVENTS\_DURING\_G1\_S\_T

:ROID\_HORMONES\_AND\_VITAMINS\_A\_AND\_D;REACTOME\_TRAFFICKING\_AND\_PROCESSING

ACTOME\_ADAPTIVE\_IMMUNE\_SYSTEM;REACTOME\_CLASS\_I\_MHC\_MEDIATED\_ANTIGEN\_PRO

IOLOGY;REACTOME\_AXON\_GUIDANCE;REACTOME\_NCAM\_SIGNALING\_FOR\_NEURITE\_OUT\_G

OME\_FORMATION\_OF\_THE\_TERNARY\_COMPLEX\_AND\_SUBSEQUENTLY\_THE\_43S\_COMPLE

REACTOME\_SIGNALING\_BY\_SCF\_KIT;REACTOME\_DEVELOPMENTAL\_BIOLOGY;REACTOME\_  
REACTOME\_NGF\_SIGNALLING\_VIA\_TRKA\_FROM\_THE\_PLASMA\_MEMBRANE

ROSS\_CHEMICAL\_SYNAPSES;REACTOME\_NEURONAL\_SYSTEM;REACTOME\_NEUROTRANSMIT

REACTOME\_DEVELOPMENTAL\_BIOLOGY;REACTOME\_TRIF\_MEDIATED\_TLR3\_SIGNALING;RE

NA;REACTOME\_METABOLISM\_OF\_RNA;REACTOME\_NONSENSE\_MEDIATED\_DECAY\_ENHANCING  
SIGNALLING\_CASCADE;REACTOME\_PKB\_MEDIATED\_EVENTS;REACTOME\_SIGNALING\_BY\_IRK5  
RIPTION\_INITIATION\_FROM\_TYPE\_2\_PROMOTER;REACTOME\_RNA\_POL\_III\_TRANSCRIPTION

REACTIONS\_AT\_THE\_VASCULAR\_WALL;REACTOME\_INTEGRIN\_CELL\_SURFACE\_INTERACTIO

IC\_CCT\_WITH\_TARGET\_PROTEINS\_DURING\_BIOSYNTHESIS;REACTOME\_PROTEIN\_FOLDING

SOLIC\_CA2\_LEVELS;REACTOME\_PLATELET\_HOMEOSTASIS;REACTOME\_PLATELET\_CALCII

LOGY;REACTOME\_PPARA\_ACTIVATES\_GENE\_EXPRESSION;REACTOME\_RORA\_ACTIVATES

GTPASES

NTHESES;REACTOME\_FATTY\_ACYL\_COA\_BIOSYNTHESIS;REACTOME\_INTEGRATION\_OF\_EN

LOGY;REACTOME\_BMAL1\_CLOCK\_NPAS2\_ACTIVATES\_CIRCADIAN\_EXPRESSION;REACTOM

RANSPORT\_OF\_SMALL\_MOLECULES;REACTOME\_SLC\_MEDIATED\_TRANSMEMBRANE\_TRAN:

LOGY;REACTOME\_AXON\_GUIDANCE;REACTOME\_NCAM1\_INTERACTIONS;REACTOME\_NCA

RPTION;REACTOME\_MRNA\_CAPPING;REACTOME\_MRNA\_PROCESSING;REACTOME\_TRANS

LOGY;REACTOME\_MYOGENESIS

RANSPORT\_OF\_SMALL\_MOLECULES;REACTOME\_ION\_TRANSPORT\_BY\_P\_TYPE\_ATPASES;R

GTPASES

GTPASES

LOGY;REACTOME\_MYOGENESIS

LOGY;REACTOME\_MYOGENESIS

LOGY;REACTOME\_PPARA\_ACTIVATES\_GENE\_EXPRESSION;REACTOME\_METABOLISM\_OF\_

ATION\_OF\_MUCINS;REACTOME\_TERMINATION\_OF\_O\_GLYCAN\_BIOSYNTHESIS;REACTOME

ATION\_OF\_MUCINS;REACTOME\_TERMINATION\_OF\_O\_GLYCAN\_BIOSYNTHESIS;REACTOME

ATION\_OF\_MUCINS;REACTOME\_TERMINATION\_OF\_O\_GLYCAN\_BIOSYNTHESIS;REACTOME

ATION\_OF\_MUCINS;REACTOME\_TERMINATION\_OF\_O\_GLYCAN\_BIOSYNTHESIS;REACTOME

'TION\_PATHWAY

4\_HETEROTRIMER\_REGULATES\_TRANSCRIPTION;REACTOME\_TRANSCRIPTIONAL\_ACTIVIT

NO\_ACIDS\_AND\_DERIVATIVES;REACTOME\_AMINE\_DERIVED\_HORMONES;REACTOME\_TRAN

REACTOME\_P75\_NTR\_RECEPTOR\_MEDIATED\_SIGNALLING;REACTOME\_SIGNALING\_BY\_GP

SS\_CHEMICAL\_SYNAPSES;REACTOME\_NEURONAL\_SYSTEM;REACTOME\_NEUROTRANSMIT

SS\_CHEMICAL\_SYNAPSES;REACTOME\_NEURONAL\_SYSTEM;REACTOME\_NEUROTRANSMIT

TEINS;REACTOME\_POST\_TRANSLATIONAL\_MODIFICATION\_SYNTHESIS\_OF\_GPI\_ANCHORE

TEINS;REACTOME\_POST\_TRANSLATIONAL\_MODIFICATION\_SYNTHESIS\_OF\_GPI\_ANCHORE

'TION\_PATHWAY

ICATION;REACTOME\_SIGNAL\_REGULATORY\_PROTEIN\_SIRP\_FAMILY\_INTERACTIONS

ALLING\_PATHWAY\_VIA\_PKC\_AND\_MAPK;REACTOME\_TRANSMISSION\_ACROSS\_CHEMICAL\_

REACTOME\_REGULATION\_OF\_SIGNALING\_BY\_CBL;REACTOME\_IL\_3\_5\_AND\_GM-CSF\_SIGNAL  
)LOGY;REACTOME\_BMAL1\_CLOCK\_NPAS2\_ACTIVATES\_CIRCADIAN\_EXPRESSION;REACTOM  
)LOGY;REACTOME\_BMAL1\_CLOCK\_NPAS2\_ACTIVATES\_CIRCADIAN\_EXPRESSION;REACTOM

\_METABOLISM;REACTOME\_METABOLISM\_OF\_AMINO\_ACIDS\_AND\_DERIVATIVES

NO\_ACIDS\_AND\_DERIVATIVES

SION\_AND\_PROCESSING;REACTOME\_PRE\_NOTCH\_PROCESSING\_IN\_GOLGI;REACTOME\_SI

)LOGY;REACTOME\_BMAL1\_CLOCK\_NPAS2\_ACTIVATES\_CIRCADIAN\_EXPRESSION;REACTOM  
ENE\_EXPRESSION;REACTOME\_METABOLISM\_OF\_LIPIDS\_AND\_LIPOPROTEINS;REACTOME\_  
CELL\_CYCLE;REACTOME\_CHROMOSOME\_MAINTENANCE;REACTOME\_MEIOTIC\_SYNAPSIS

ROCESSING\_OF\_ENDOSOMAL\_TLR;REACTOME\_TRAF6\_MEDIATED\_INDUCTION\_OF\_NFKB\_A

PROCESSING\_OF\_ENDOSOMAL\_TLR;REACTOME\_TRAF6\_MEDIATED\_INDUCTION\_OF\_NFKB\_A  
CONTRACTION;REACTOME\_MUSCLE\_CONTRACTION  
IONS;REACTOME\_TRANSMISSION\_ACROSS\_CHEMICAL\_SYNAPSES;REACTOME\_NEURONAL\_

RESPIRATORY\_ELECTRON\_TRANSPORT;REACTOME\_RESPIRATORY\_ELECTRON\_TRANSPORT;  
BIOLOGY;REACTOME\_PPARA\_ACTIVATES\_GENE\_EXPRESSION;REACTOME\_GENERIC\_TRANSC

GTPASES;REACTOME\_SIGNALLING\_BY\_NGF;REACTOME\_CELL\_CELL\_COMMUNICATION;RE/

PHOSPHORYLATION\_OF\_CELLULAR\_PROTEINS;REACTOME\_APOPTOSIS;REACTOME\_APOPTOTIC\_EXECUTION

ADRENERGIC\_BETA\_SIGNALING;REACTOME\_INTERFERON\_SIGNALING;REACTOME\_IMMUNE\_SYSTEM;RE/

LOGY;REACTOME\_TCR\_SIGNALING;REACTOME\_GENERATION\_OF\_SECOND\_MESSENGER\_

PROTEOLYTIC\_ACTIVITY\_OF\_APC\_C\_REQUIRED\_FOR\_THE\_ONSET\_OF\_ANAPHASE\_BY\_MITO

PROTEIN\_IMPORT;REACTOME\_GLYCOGENOLYSIS;REACTOME\_METABOLISM\_OF\_PROTEINS;I  
REACTOME\_ADAPTIVE\_IMMUNE\_SYSTEM;REACTOME\_CLASS\_I\_MHC\_MEDIATED\_ANTIGEN\_PR

IGNALING\_PATHWAY\_VIA\_PKC\_AND\_MAPK;REACTOME\_SIGNALING\_BY\_GPCR;REACTOME\_PE  
TRANSPORT\_OF\_SMALL\_MOLECULES;REACTOME\_SLC\_MEDIATED\_TRANSMEMBRANE\_TRAN  
SPORT\_OF\_SMALL\_MOLECULES;REACTOME\_SLC\_MEDIATED\_TRANSMEMBRANE\_TRAN

CTION\_PATHWAY

LOGY;REACTOME\_AXON\_GUIDANCE;REACTOME\_ACTIVATION\_OF\_RAC;REACTOME\_SIGNA

PORT\_ACROSS\_THE\_PLASMA\_MEMBRANE;REACTOME\_TRANSMEMBRANE\_TRANSPORT\_OF\_

TRIX\_ORGANIZATION;REACTOME\_COLLAGEN\_FORMATION

TRIX\_ORGANIZATION;REACTOME\_COLLAGEN\_FORMATION

CELL\_CYCLE;REACTOME\_CHROMOSOME\_MAINTENANCE;REACTOME\_MEIOTIC\_SYNOPSIS

.TRANSMITS\_SIGNAL\_TO\_THE\_NUCLEUS;REACTOME\_SIGNALING\_BY\_NOTCH1;REACTOME\_

ONS;REACTOME\_GLUTATHIONE\_CONJUGATION;REACTOME\_PHASE\_II\_CONJUGATION

REACTOME\_SIGNALING\_BY\_SCF\_KIT;REACTOME\_SIGNALING\_BY\_ERBB4;REACTOME\_SIGN.

4;REACTOME\_DOWNREGULATION\_OF\_ERBB2\_ERBB3\_SIGNALING;REACTOME\_SIGNALING\_I  
AIR;REACTOME\_RESOLUTION\_OF\_AP\_SITES\_VIA\_THE\_MULTIPLE\_NUCLEOTIDE\_PATCH\_RE



ALLING\_PATHWAY\_VIA\_PKC\_AND\_MAPK;REACTOME\_SIGNALING\_BY\_GPCR;REACTOME\_G\_  
NO\_ACIDS\_AND\_DERIVATIVES

\_SALT\_METABOLISM;REACTOME\_SYNTHESIS\_OF\_BILE\_ACIDS\_AND\_BILE\_SALTS\_VIA\_7ALPH

ME\_CELL\_CYCLE\_MITOTIC;REACTOME\_RECRUITMENT\_OF\_MITOTIC\_CENTROSOME\_PROTEI

'\_INTERACTIONS\_BETWEEN\_A\_LYMPHOID\_AND\_A\_NON\_LYMPHOID\_CELL;REACTOME\_IMMUNOLOGY;REACTOME\_BMAL1\_CLOCK\_NPAS2\_ACTIVATES\_CIRCADIAN\_EXPRESSION;REACTOME

IM\_BY\_IFN\_STIMULATED\_GENES;REACTOME\_INTERFERON\_ALPHA\_BETA\_SIGNALING;REACTOME\_ADAPTIVE\_IMMUNE\_SYSTEM;REACTOME\_CLASS\_I\_MHC\_MEDIATED\_ANTIGEN\_PRESENTATION

TRANSMITS\_SIGNAL\_TO\_THE\_NUCLEUS;REACTOME\_SIGNALING\_BY\_NOTCH1;REACTOME

R\_SIGNALING\_IN\_EMT\_EPITHELIAL\_TO\_MESENCHYMAL\_TRANSITION;REACTOME\_GPVI\_MEDIATED\_SIGNALING

\_DNA\_FRAGMENTATION;REACTOME\_APOPTOSIS;REACTOME\_APOPTOTIC\_EXECUTION\_PH  
)  
)

TRANSPORT\_OF\_SMALL\_MOLECULES;REACTOME\_SLC\_MEDIATED\_TRANSMEMBRANE\_TRAN:

TRIX\_ORGANIZATION;REACTOME\_COLLAGEN\_FORMATION

REACTOME\_SIGNALING\_BY\_SCF\_KIT;REACTOME\_SIGNALING\_BY\_ERBB4;REACTOME\_SIGN.

;REACTOME\_CLASS\_C\_3\_METABOTROPIC\_Glutamate\_PHEROMONE\_RECEPTORS;REACT  
CTOME\_ADAPTIVE\_IMMUNE\_SYSTEM;REACTOME\_CLASS\_I\_MHC\_MEDIATED\_ANTIGEN\_PR  
CTOME\_ADAPTIVE\_IMMUNE\_SYSTEM;REACTOME\_CLASS\_I\_MHC\_MEDIATED\_ANTIGEN\_PR

ACTOME\_IMMUNE\_SYSTEM;REACTOME\_ADAPTIVE\_IMMUNE\_SYSTEM  
ON;REACTOME\_CHONDROITIN\_SULFATE\_DERMATAN\_SULFATE\_METABOLISM;REACTOME\_I  
ON;REACTOME\_CHONDROITIN\_SULFATE\_DERMATAN\_SULFATE\_METABOLISM;REACTOME\_I

RBOHYDRATES  
DS\_AND\_LIPOPROTEINS;REACTOME\_FATTY\_ACID\_TRIACYLGLYCEROL\_AND\_KETONE\_BOD

OSTEINS;REACTOME\_POST\_TRANSLATIONAL\_PROTEIN\_MODIFICATION;REACTOME\_AS PARA

REACTOME\_DEVELOPMENTAL\_BIOLOGY;REACTOME\_TRIF\_MEDIATED\_TLR3\_SIGNALING;RE

E\_AND\_DEGRADATION;REACTOME\_HYALURONAN\_METABOLISM;REACTOME\_GLYCOSAMIN  
E\_AND\_DEGRADATION;REACTOME\_HYALURONAN\_METABOLISM;REACTOME\_GLYCOSAMIN

CT;REACTOME\_REGULATION\_OF\_KIT\_SIGNALING;REACTOME\_NEF\_MEDIATES\_DOWN\_MO

REACTOME\_VOLTAGE\_GATED\_POTASSIUM\_CHANNELS;REACTOME\_POTASSIUM\_CHANNEL:  
REACTOME\_VOLTAGE\_GATED\_POTASSIUM\_CHANNELS;REACTOME\_POTASSIUM\_CHANNEL:

PPED\_INTRON\_CONTAINING\_PRE\_MRNA;REACTOME\_MRNA\_PROCESSING;REACTOME\_MR  
OLOGY;REACTOME\_PPARA\_ACTIVATES\_GENE\_EXPRESSION;REACTOME\_GENERIC\_TRANSC

OF\_FGF\_SIGNALING;REACTOME\_NEGATIVE\_REGULATION\_OF\_FGFR\_SIGNALING;REACTOME

ASIS;REACTOME\_PLATELET\_SENSITIZATION\_BY\_LDL;REACTOME\_HEMOSTASIS

STIMULATES\_FATTY\_ACID\_OXIDATION\_IN\_MUSCLE;REACTOME\_INSULIN\_RECEPTOR\_SIGNAL

;TOME\_ANTIVIRAL\_MECHANISM\_BY\_IFN\_STIMULATED\_GENES;REACTOME\_SIGNALING\_BY\_

PROTEINS;REACTOME\_POST\_TRANSLATIONAL\_MODIFICATION\_SYNTHESIS\_OF\_GPI\_ANCHORE

ALLING\_PATHWAY\_VIA\_PKC\_AND\_MAPK;REACTOME\_SIGNALING\_BY\_GPCR;REACTOME\_CL

NS\_MEDIATED\_TRANSPORT;REACTOME\_TRANSMEMBRANE\_TRANSPORT\_OF\_SMALL\_MOLE  
NS\_MEDIATED\_TRANSPORT;REACTOME\_TRANSMEMBRANE\_TRANSPORT\_OF\_SMALL\_MOLE

TRIX\_ORGANIZATION;REACTOME\_COLLAGEN\_FORMATION

RIPTION\_AND\_TRANSLATION;REACTOME\_PRE\_NOTCH\_EXPRESSION\_AND\_PROCESSING;R  
GTPASES;REACTOME\_DEVELOPMENTAL\_BIOLOGY;REACTOME\_SIGNALING\_BY\_GPCR;REAC

3LEOTIDES;REACTOME\_PURINE\_SALVAGE;REACTOME\_PURINE\_METABOLISM  
3LEOTIDES;REACTOME\_PURINE\_SALVAGE;REACTOME\_PURINE\_METABOLISM

RIPTION\_AND\_TRANSLATION;REACTOME\_SIGNALING\_BY\_NOTCH2;REACTOME\_PRE\_NOTC  
RIPTION\_AND\_TRANSLATION;REACTOME\_SIGNALING\_BY\_NOTCH2;REACTOME\_PRE\_NOTC

RIPTION\_INITIATION\_FROM\_TYPE\_2\_PROMOTER;REACTOME\_RNA\_POL\_III\_TRANSCRIPTION

IA\_AMINOACYLATION;REACTOME\_TRNA\_AMINOACYLATION  
\_AT\_THE\_GOLGI\_MEMBRANE;REACTOME\_PHOSPHOLIPID\_METABOLISM;REACTOME\_PI\_ME

ACTOME\_ADAPTIVE\_IMMUNE\_SYSTEM;REACTOME\_CLASS\_I\_MHC\_MEDIATED\_ANTIGEN\_PRO  
TEIN\_IMPORT;REACTOME\_METABOLISM\_OF\_PROTEINS

ME\_CELL\_CYCLE\_MITOTIC;REACTOME\_MITOTIC\_M\_M\_G1\_PHASES;REACTOME\_DNA\_REPLI  
GTPASES;REACTOME\_SIGNALLING\_BY\_NGF;REACTOME\_DEVELOPMENTAL\_BIOLOGY;REAC

TEM;REACTOME\_IMMUNE\_SYSTEM;REACTOME\_COMPLEMENT\_CASCADE;REACTOME\_CRE

;REACTOME\_GPCR\_DOWNSTREAM\_SIGNALING;REACTOME\_G\_ALPHA\_I\_SIGNALLING\_EVENTS;  
REACTOME\_TRANSCRIPTION;REACTOME\_RNA\_POL\_I\_RNA\_POL\_III\_AND\_MITOCHONDRIAL\_REACTIONS\_AT\_THE\_VASCULAR\_WALL;REACTOME\_RESPONSE\_TO\_ELEVATED\_PLATELET\_C  
;REACTOME\_REGULATION\_OF\_INSULIN\_LIKE\_GROWTH\_FACTOR\_IGF\_ACTIVITY\_BY\_INSULIN;  
REACTOME\_AXON\_GUIDANCE;REACTOME\_SIGNALING\_BY\_ROBO\_RECEPTOR

REACTOME\_NON\_CODING\_RNA;REACTOME\_ANTIVIRAL\_MECHANISM\_BY\_IFN\_STIMULATED\_GENES;REACTOME

REACTOME\_AXON\_GUIDANCE;REACTOME\_NCAM1\_INTERACTIONS;REACTOME\_NCA

PROTEIN\_IMPORT;REACTOME\_METABOLISM\_OF\_PROTEINS;  
REACTOME\_SYNTHESIS\_OF\_PE;REACTOME\_GLYCEROPHOSPHOLIPID\_BIOSYNTHESIS;  
REACTOME\_AXON\_GUIDANCE;REACTOME\_NCAM1\_INTERACTIONS;REACTOME\_NCA  
COMPLEMENT\_CASCADE;REACTOME\_INNATE\_IMMUNE\_SYSTEM;REACTOME\_IMMUNE\_SYSTEM

REACTOME\_AXON\_GUIDANCE;REACTOME\_CRMP5\_IN\_SEMA3A\_SIGNALING;REACTOME  
STEROID\_HORMONES\_AND\_VITAMINS\_A\_AND\_D;REACTOME\_STEROID\_HORMONES;REACTOME

TRANSPORT\_OF\_SMALL\_MOLECULES;REACTOME\_IRON\_UPTAKE\_AND\_TRANSPORT

REACTOME\_NUCLEAR\_RECEPTOR\_TRANSCRIPTION\_PATHWAY

REACTOME\_TRNA\_AMINOACYLATION;  
REACTOME\_TRNA\_AMINOACYLATION

REACTOME\_SIGNALING\_BY\_NODAL;REACTOME\_RESPONSE\_TO\_ELEVATED\_PLATELET

REACTOME\_SIGNALING\_BY\_NG2F;REACTOME\_NG2F\_SIGNALS\_DEATH\_THROUGH

REACTOME\_TANDEM\_PORE\_DOMAIN\_POTASSIUM\_CHANNELS;REACTOME\_POTASSIUM\_CH

REACTOME\_SIGNALING\_BY\_SCF\_KIT;REACTOME\_DEVELOPMENTAL\_BIOLOGY;REACTOME\_  
TION\_PATHWAY

NO\_ACIDS\_AND\_DERIVATIVES;REACTOME\_AMINE\_DERIVED\_HORMONES

ELLING\_OF\_PC;REACTOME\_PHOSPHOLIPID\_METABOLISM;REACTOME\_ACYL\_CHAIN\_REMOI  
REACTOME\_GROWTH\_HORMONE\_RECEPTOR\_SIGNALING;REACTOME\_SIGNALING\_BY\_ERE

REACTOME\_INTEGRATION\_OF\_ENERGY\_METABOLISM;REACTOME\_REGULATION\_OF\_INSUL

LOGY;REACTOME\_BMAL1\_CLOCK\_NPAS2\_ACTIVATES\_CIRCADIAN\_EXPRESSION;REACTOM

CLEOTIDES;REACTOME\_PYRIMIDINE\_METABOLISM  
CLEOTIDES;REACTOME\_PYRIMIDINE\_METABOLISM

TRANSPORT\_OF\_SMALL\_MOLECULES;REACTOME\_SLC\_MEDIATED\_TRANSMEMBRANE\_TRAN:

LOGY;REACTOME\_CELL\_CELL\_COMMUNICATION;REACTOME\_AXON\_GUIDANCE;REACTOMI  
LOGY;REACTOME\_CELL\_CELL\_COMMUNICATION;REACTOME\_AXON\_GUIDANCE;REACTOMI  
REACTOME\_P75\_NTR\_RECEPTOR\_MEDIATED\_SIGNALLING

ONS;REACTOME\_METABOLISM\_OF\_CARBOHYDRATES;REACTOME\_GLUCURONIDATION;REA/  
:ACTOME\_IL1\_SIGNALING;REACTOME\_IRAK1\_RECRUITS\_IKK\_COMPLEX;REACTOME\_TRAF6.  
GTPASES

XYLATION\_HYPUSINE\_FORMATION\_AND\_ARYLSULFATASE\_ACTIVATION;REACTOME\_GAMM,

SPED\_INTRON\_CONTAINING\_PRE\_MRNA;REACTOME\_MRNA\_PROCESSING;REACTOME\_MR

ME\_CELL\_CYCLE\_MITOTIC;REACTOME\_MITOTIC\_M\_M\_G1\_PHASES;REACTOME\_DNA\_REPLI

REACTOME\_SIGNALLING\_TO\_RAS;REACTOME\_NGF\_SIGNALLING\_VIA\_TRKA\_FROM\_THE\_PL  
KYLATION\_HYPUSINE\_FORMATION\_AND\_ARYLSULFATASE\_ACTIVATION;REACTOME\_GAMMA  
\_METABOLISM;REACTOME\_PHOSPHOLIPID\_METABOLISM;REACTOME\_SPHINGOLIPID\_META

;REACTOME\_CLASS\_A1\_RHODOPSIN\_LIKE\_RECEPTORS;REACTOME\_GPCR\_LIGAND\_BINDIN

:ONTRACTION;REACTOME\_MUSCLE\_CONTRACTION  
KING;REACTOME\_SIGNALING\_BY\_EGFR\_IN\_CANCER;REACTOME\_EGFR\_DOWNREGULATION

ERGY\_METABOLISM;REACTOME\_REGULATION\_OF\_INSULIN\_SECRETION;REACTOME\_SYNT  
ERGY\_METABOLISM;REACTOME\_REGULATION\_OF\_INSULIN\_SECRETION;REACTOME\_SYNT  
\_SALT\_METABOLISM;REACTOME\_SYNTHESIS\_OF\_BILE\_ACIDS\_AND\_BILE\_SALTS\_VIA\_7ALPH



ME\_MHC\_CLASS\_II\_ANTIGEN\_PRESENTATION;REACTOME\_CELL\_CYCLE\_MITOTIC;REACTOME\_CELL\_SURFACE\_INTERACTIONS;REACTOME\_INTEGRATION\_OF\_ENERGY\_METABOLISM;REACTOME\_IN  
TOSS\_CHEMICAL\_SYNAPSES;REACTOME\_NEURONAL\_SYSTEM;REACTOME\_NEUROTRANSMIT  
TER\_METABOLISM;REACTOME\_METABOLISM\_OF\_LIPIDS\_AND\_LIPOPROTEINS  
;REACTOME\_GPCR\_DOWNSTREAM\_SIGNALING;REACTOME\_G\_ALPHA\_S\_SIGNALLING\_EVEI

NTROLOGY;REACTOME\_ANTIGEN\_PROCESSING\_CROSS\_PRESENTATION;REACTOME\_CELL\_SURFACE  
TOLOGY;REACTOME\_EXTRACELLULAR\_MATRIX\_ORGANIZATION;REACTOME\_COLLAGEN\_FOLDI  
NG;REACTOME\_GROWTH\_HORMONE\_RECEPTOR\_SIGNALING;REACTOME\_ANTIVIRAL\_MECHANIS

REACTOME\_METABOLISM\_OF\_PROTEINS

REACTOME\_NO\_ACIDS\_AND\_DERIVATIVES

REACTOME\_OF\_HOMO\_SAPIENS\_WITH\_MYCOBACTERIUM\_TUBERCULOSIS;REACTOME\_TRANSMEMBRANE

REACTOME\_CONTRACTION;REACTOME\_MUSCLE\_CONTRACTION

REACTOME\_GROWTH\_HORMONE\_RECEPTOR\_SIGNALING;REACTOME\_INSULIN\_RECEPTOR

SIGNALING\_PATHWAY\_VIA\_PKC\_AND\_MAPK;REACTOME\_SIGNALING\_BY\_GPCR;REACTOME\_PEP

REACTOME\_CIRCADIAN\_CLOCK

LOGY;REACTOME\_AXON\_GUIDANCE;REACTOME\_L1CAM\_INTERACTIONS

;FANCONI\_ANEMIA\_PATHWAY;REACTOME\_FANCONI\_ANEMIA\_PATHWAY;REACTOME\_DNA  
LOSS\_CHEMICAL\_SYNAPSES;REACTOME\_NEURONAL\_SYSTEM;REACTOME\_NEUROTRANSMIT

REACTOME\_SIGNALING\_BY\_SCF\_KIT;REACTOME\_DEVELOPMENTAL\_BIOLOGY;REACTOME\_

REACTOME\_VOLTAGE\_GATED\_POTASSIUM\_CHANNELS;REACTOME\_POTASSIUM\_CHANNEL:  
TION\_PATHWAY;REACTOME\_NUCLEAR\_RECEPTOR\_TRANSCRIPTION\_PATHWAY

TRANSPORT\_OF\_SMALL\_MOLECULES;REACTOME\_SLC\_MEDIATED\_TRANSMEMBRANE\_TRAN:  
R\_SIGNALING\_IN\_EMT\_EPITHELIAL\_TO\_MESENCHYMAL\_TRANSITION;REACTOME\_DOWNRE

MEIOTIC\_RECOMBINATION

;REACTOME\_PEPTIDE\_LIGAND\_BINDING\_RECEPTORS;REACTOME\_CLASS\_A1\_RHODOPSIN\_

TRIX\_ORGANIZATION;REACTOME\_COLLAGEN\_FORMATION

ENE\_EXPRESSION;REACTOME\_METABOLISM\_OF\_LIPIDS\_AND\_LIPOPROTEINS;REACTOME\_

SS\_CHEMICAL\_SYNAPSES;REACTOME\_NEURONAL\_SYSTEM  
SS\_CHEMICAL\_SYNAPSES;REACTOME\_NEURONAL\_SYSTEM  
\_IN\_DISEASE;REACTOME\_SIGNALING\_BY\_FGFR  
PTOSIS;REACTOME\_ROLE\_OF\_DCC\_IN\_REGULATING\_APOPTOSIS;REACTOME\_APOPTOSIS

NO\_ACIDS\_AND\_DERIVATIVES  
LOGY;REACTOME\_AXON\_GUIDANCE;REACTOME\_CRMP5\_IN\_SEMA3A\_SIGNALING;REACTO

CELL\_CYCLE;REACTOME\_CELL\_CYCLE\_CHECKPOINTS;REACTOME\_REGULATION\_OF\_THE\_  
TRIX\_ORGANIZATION;REACTOME\_COLLAGEN\_FORMATION

CTIVITY\_OF\_SMAD2\_SMAD3\_SMAD4\_HETEROTRIMER;REACTOME\_DOWNREGULATION\_OF\_  
REACTOME\_CGMP\_EFFECTS;REACTOME\_NITRIC\_OXIDE\_STIMULATES\_GUANYLATE\_CYCLA

NO\_ACIDS\_AND\_DERIVATIVES;REACTOME\_BRANCHED\_CHAIN\_AMINO\_ACID\_CATABOLISM

;REACTOME\_PEPTIDE\_LIGAND\_BINDING\_RECEPTORS;REACTOME\_CLASS\_A1\_RHODOPSIN

ATION\_OF\_MUCINS;REACTOME\_TERMINATION\_OF\_O\_GLYCAN\_BIOSYNTHESIS;REACTOME

;REACTOME\_ACTIVATION\_OF\_CHAPERONE\_GENES\_BY\_XBP1S;REACTOME\_UNFOLDED\_PF

ORS\_OF\_RIG\_I\_MDA5\_SIGNALING;REACTOME\_RIG\_I\_MDA5\_MEDIATED\_INDUCTION\_OF\_IFN\_  
ORS\_OF\_RIG\_I\_MDA5\_SIGNALING;REACTOME\_RIG\_I\_MDA5\_MEDIATED\_INDUCTION\_OF\_IFN\_

GTPASES

SS\_CHEMICAL\_SYNAPSES;REACTOME\_NEURONAL\_SYSTEM;REACTOME\_NEUROTRANSMIT

;REACTOME\_INSULIN\_SYNTHESIS\_AND\_PROCESSING

ONS;REACTOME\_GLUCURONIDATION;REACTOME\_PHASE\_II\_CONJUGATION

TRANSPORT\_OF\_SMALL\_MOLECULES;REACTOME\_SLC\_MEDIATED\_TRANSMEMBRANE\_TRAN:  
TRIX\_ORGANIZATION;REACTOME\_COLLAGEN\_FORMATION

REACTOME\_CELL\_CYCLE;REACTOME\_CELL\_CYCLE\_MITOTIC;REACTOME\_MITOTIC\_G1\_G1\_S  
GTPASES

REACTOME\_HEPARAN\_SULFATE\_HEPARIN\_HS\_GAG\_METABOLISM;REACTOME\_GLYCOSE

REACTOME\_MUCIN\_GLYCANIZATION\_OF\_MUCINS;REACTOME\_METABOLISM\_OF\_PROTEINS;REACTOME\_POST\_TRANSLA

REACTOME\_TRANSPORT\_OF\_SMALL\_MOLECULES;REACTOME\_SLC\_MEDIATED\_TRANSMEMBRANE\_TRAN  
SPORT\_IN\_MITOTIC\_CELL\_CYCLE\_MITOTIC;REACTOME\_RECRUITMENT\_OF\_MITOTIC\_CENTROSOME\_PROTEI

REACTOME\_TRANSPORT\_OF\_SMALL\_MOLECULES;REACTOME\_SLC\_MEDIATED\_TRANSMEMBRANE\_TRAN

REACTOME\_GTPASES;REACTOME\_SIGNALLING\_BY\_NGF;REACTOME\_DEVELOPMENTAL\_BIOLOGY;REAC  
TOME\_GTPASES;REACTOME\_SIGNALLING\_BY\_NGF;REACTOME\_DEVELOPMENTAL\_BIOLOGY;REAC

REACTOME\_STIMULATES\_FATTY\_ACID\_OXIDATION\_IN\_MUSCLE;REACTOME\_INSULIN\_RECEPTOR\_SIGNAL

DS\_AND\_LIPOPROTEINS;REACTOME\_FATTY\_ACID\_TRIACYLGLYCEROL\_AND\_KETONE\_BOD  
ENE\_EXPRESSION;REACTOME\_METABOLISM\_OF\_LIPIDS\_AND\_LIPOPROTEINS;REACTOME\_

;REACTOME\_OPIOID\_SIGNALLING;REACTOME\_DARPP\_32\_EVENTS;REACTOME\_GPCR\_DOW  
ME\_CELL\_CYCLE\_MITOTIC;REACTOME\_MITOTIC\_M\_M\_G1\_PHASES;REACTOME\_CHROMOS

REACTOME\_SIGNALING\_BY\_SCF\_KIT;REACTOME\_CELL\_CELL\_COMMUNICATION;REACTOM  
ME\_CELL\_CYCLE\_CHECKPOINTS;REACTOME\_ACTIVATION\_OF\_ATR\_IN\_RESPONSE\_TO\_RE

REACTOME\_CHONDROITIN\_SULFATE\_BIOSYNTHESIS;REACTOME\_CHONDROITIN\_SULFAT

REACTOME\_GLYCC

REACTOME\_AXON\_GUIDANCE;REACTOME\_OTHER\_SEMAPHORIN\_INTERACTIONS;RE

REACTOME\_CELL\_CYCLE\_MITOTIC;REACTOME\_CELL\_CYCLE\_CHECKPOINTS;REACTOME\_CYCLIN\_A  
REACTOME\_CELL\_CYCLE\_MITOTIC;REACTOME\_CELL\_CYCLE\_CHECKPOINTS;REACTOME\_CYCLIN\_A  
REACTOME\_BETA\_SIGNALING;REACTOME\_INTERFERON\_SIGNALING;REACTOME\_IMMUNE\_SYSTEM;RE/  
REACTOME\_BETA\_SIGNALING;REACTOME\_INTERFERON\_SIGNALING;REACTOME\_IMMUNE\_SYSTEM;RE/

REACTOME\_CTNNB1\_PHOSPHORYLATION\_CASCADE  
REACTOME\_NITRIC\_OXIDE\_STIMULATES\_GUANYLATE\_CYCLASE;REACTOME\_PLATELET\_HOMEC

)  
AMINOACYLATION;REACTOME\_TRNA\_AMINOACYLATION  
BIOLOGY;REACTOME\_AXON\_GUIDANCE;REACTOME\_NETRIN1\_SIGNALING

ON\_OF\_FGFR\_SIGNALING;REACTOME\_INSULIN\_RECEPTOR\_SIGNALLING\_CASCADE;REACTO  
ON\_OF\_FGFR\_SIGNALING;REACTOME\_INSULIN\_RECEPTOR\_SIGNALLING\_CASCADE;REACTO  
ON\_OF\_FGFR\_SIGNALING;REACTOME\_INSULIN\_RECEPTOR\_SIGNALLING\_CASCADE;REACTO

OME\_SRP\_DEPENDENT\_COTRANSLATIONAL\_PROTEIN\_TARGETING\_TO\_MEMBRANE;REACT  
;REACTOME\_CLASS\_C\_3\_METABOTROPIC\_Glutamate\_PHEROMONE\_RECEPTORS;REACT

PROTEINS;REACTOME\_POST\_TRANSLATIONAL\_PROTEIN\_MODIFICATION;REACTOME\_ASPARA  
PROTEINS;REACTOME\_POST\_TRANSLATIONAL\_PROTEIN\_MODIFICATION;REACTOME\_SYNTHE

PHOSPHORYLATION;REACTOME\_TRANS\_GOLGI\_NETWORK\_VESICLE\_BUDDING;REACTOME\_GOLGI\_ASSOC

REPLICATION\_PATHWAY

RECOMBINATION\_REPAIR\_OF\_REPLICATION\_INDEPENDENT\_DOUBLE\_STRAND\_BREAKS;REACTO

AMINOACYLATION;REACTOME\_TRNA\_AMINOACYLATION

TRIX\_ORGANIZATION;REACTOME\_COLLAGEN\_FORMATION  
TRIX\_ORGANIZATION;REACTOME\_COLLAGEN\_FORMATION  
REACTOME\_DAG\_AND\_IP3\_SIGNALING;REACTOME\_SIGNALING\_BY\_ERBB2;REACTOME\_SIG

'TION\_PATHWAY;REACTOME\_NUCLEAR\_RECEPTOR\_TRANSCRIPTION\_PATHWAY  
'TION\_PATHWAY;REACTOME\_NUCLEAR\_RECEPTOR\_TRANSCRIPTION\_PATHWAY  
'TION\_PATHWAY;REACTOME\_NUCLEAR\_RECEPTOR\_TRANSCRIPTION\_PATHWAY  
OME\_SRP\_DEPENDENT\_COTRANSLATIONAL\_PROTEIN\_TARGETING\_TO\_MEMBRANE;REACT

\_IN\_DISEASE;REACTOME\_FRS2\_MEDIATED\_CASCADE;REACTOME\_DOWNSTREAM\_SIGNALII

OGENESIS;REACTOME\_REGULATORY\_RNA\_PATHWAYS

TRIX\_ORGANIZATION;REACTOME\_COLLAGEN\_FORMATION

NO\_ACIDS\_AND\_DERIVATIVES;REACTOME\_BRANCHED\_CHAIN\_AMINO\_ACID\_CATABOLISM  
RANSPORT\_OF\_SMALL\_MOLECULES;REACTOME\_SLC\_MEDIATED\_TRANSMEMBRANE\_TRAN:

'TION\_PATHWAY;REACTOME\_NUCLEAR\_RECEPTOR\_TRANSCRIPTION\_PATHWAY

FACE\_INTERACTIONS  
FACE\_INTERACTIONS

OXICITY;REACTOME\_PROTEOLYTIC\_CLEAVAGE\_OF\_SNARE\_COMPLEX\_PROTEINS;REACTO  
.TE\_DERMATAN\_SULFATE\_METABOLISM;REACTOME\_GLYCOSAMINOGLYCAN\_METABOLISM



CELL\_CYCLE;REACTOME\_CHROMOSOME\_MAINTENANCE;REACTOME\_MEIOTIC\_SYNAPSIS  
CELL\_CYCLE;REACTOME\_CHROMOSOME\_MAINTENANCE;REACTOME\_MEIOTIC\_SYNAPSIS  
CELL\_CYCLE;REACTOME\_CHROMOSOME\_MAINTENANCE;REACTOME\_MEIOTIC\_SYNAPSIS

DS\_AND\_LIPOPROTEINS;REACTOME\_LIPID\_DIGESTION\_MOBILIZATION\_AND\_TRANSPORT;R  
ACTOME\_ADAPTIVE\_IMMUNE\_SYSTEM;REACTOME\_CLASS\_I\_MHC\_MEDIATED\_ANTIGEN\_PRO

.TE\_BIOSYNTHESIS;REACTOME\_CHONDROITIN\_SULFATE\_DERMATAN\_SULFATE\_METABOLI  
ALING\_EVENTS\_OF\_B\_CELL\_RECEPTOR\_BCR;REACTOME\_ACTIVATION\_OF\_NF\_KAPPAB\_IN

ALLING\_PATHWAY\_VIA\_PKC\_AND\_MAPK;REACTOME\_SIGNALING\_BY\_GPCR;REACTOME\_G

TRIX\_ORGANIZATION;REACTOME\_COLLAGEN\_FORMATION

VS\_MEDIATED\_TRANSPORT;REACTOME\_TRANSMEMBRANE\_TRANSPORT\_OF\_SMALL\_MOLE

NO\_ACIDS\_AND\_DERIVATIVES;REACTOME\_BRANCHED\_CHAIN\_AMINO\_ACID\_CATABOLISM  
SIGNALING;REACTOME\_TAK1\_ACTIVATES\_NFKB\_BY\_PHOSPHORYLATION\_AND\_ACTIVATI

IC\_CCT\_WITH\_TARGET\_PROTEINS\_DURING\_BIOSYNTHESIS;REACTOME\_PROTEIN\_FOLDING

ISM\_AND\_CITRIC\_ACID\_TCA\_CYCLE;REACTOME\_TCA\_CYCLE\_AND\_RESPIRATORY\_ELECTR  
REACTOME\_DAG\_AND\_IP3\_SIGNALING;REACTOME\_SIGNALING\_BY\_ERBB2;REACTOME\_SIG  
3;REACTOME\_REGULATION\_OF\_INSULIN\_LIKE\_GROWTH\_FACTOR\_IGF\_ACTIVITY\_BY\_INSUL

ATION\_OF\_MUCINS;REACTOME\_METABOLISM\_OF\_PROTEINS;REACTOME\_POST\_TRANSLA

CELL\_CYCLE;REACTOME\_CHROMOSOME\_MAINTENANCE;REACTOME\_MEIOTIC\_SYNOPSIS  
;REACTOME\_CLASS\_B\_2\_SECRETIN\_FAMILY\_RECEPTORS;REACTOME\_GPCR\_LIGAND\_BIN

.TRANSMITS\_SIGNAL\_TO\_THE\_NUCLEUS;REACTOME\_SIGNALING\_BY\_NOTCH1;REACTOME\_

LOGY;REACTOME\_EXTRACELLULAR\_MATRIX\_ORGANIZATION;REACTOME\_CELL\_SURFACE

CTOME\_ADAPTIVE\_IMMUNE\_SYSTEM;REACTOME\_CLASS\_I\_MHC\_MEDIATED\_ANTIGEN\_PR

TRIX\_ORGANIZATION;REACTOME\_COLLAGEN\_FORMATION

ATION\_OF\_MUCINS;REACTOME\_TERMINATION\_OF\_O\_GLYCAN\_BIOSYNTHESIS;REACTOME  
\_IN\_DISEASE;REACTOME\_SIGNALING\_BY\_FGFR1\_MUTANTS;REACTOME\_SIGNALING\_BY\_FG

REACTOME\_CROSS\_PRESENTATION\_OF\_SOLUBLE\_EXOGENOUS\_ANTIGENS\_ENDOSOMES;  
\_PRE\_REPLICATIVE\_COMPLEX;REACTOME\_CELL\_CYCLE;REACTOME\_ORC1\_REMOVAL\_FRC

NO\_ACIDS\_AND\_DERIVATIVES

ICATION;REACTOME\_CELL\_EXTRACELLULAR\_MATRIX\_INTERACTIONS;REACTOME\_CELL\_JU  
;REACTOME\_CLASS\_B\_2\_SECRETIN\_FAMILY\_RECEPTORS;REACTOME\_GPCR\_LIGAND\_BIN

ALLING\_PATHWAY\_VIA\_PKC\_AND\_MAPK;REACTOME\_SIGNALING\_BY\_GPCR;REACTOME\_G\_  
ALLING\_PATHWAY\_VIA\_PKC\_AND\_MAPK;REACTOME\_SIGNALING\_BY\_GPCR;REACTOME\_G\_

RECYCLING;REACTOME\_LATENT\_INFECTION\_OF\_HOMO\_SAPIENS\_WITH\_MYCOBACTERIUM

RBOHYDRATES;REACTOME\_DIGESTION\_OF\_DIETARY\_CARBOHYDRATE

RIN\_BH4\_SYNTHESIS\_RECYCLING\_SALVAGE\_AND\_REGULATION;REACTOME\_LATENT\_INFE  
OLOGY;REACTOME\_SIGNALING\_BY\_GPCR;REACTOME\_OPIOID\_SIGNALLING;REACTOME\_DAI

IMULATES\_FATTY\_ACID\_OXIDATION\_IN\_MUSCLE;REACTOME\_INSULIN\_RECEPTOR\_SIGNAL  
IMULATES\_FATTY\_ACID\_OXIDATION\_IN\_MUSCLE;REACTOME\_INSULIN\_RECEPTOR\_SIGNAL

ACTOME\_ADAPTIVE\_IMMUNE\_SYSTEM;REACTOME\_CLASS\_I\_MHC\_MEDIATED\_ANTIGEN\_PR

IE\_INNATE\_IMMUNE\_SYSTEM;REACTOME\_IMMUNE\_SYSTEM

GTPASES

OSTEINS;REACTOME\_POST\_TRANSLATIONAL\_PROTEIN\_MODIFICATION;REACTOME\_AS PARA

\_IN\_MEGAKARYOCYTE\_DEVELOPMENT\_AND\_PLATELET\_PRODUCTION;REACTOME\_HEMOST

MEIOTIC\_RECOMBINATION

YTOLOGY;REACTOME\_NEGATIVE\_REGULATION\_OF\_FGFR\_SIGNALING;REACTOME\_INSULIN\_RE  
YTOLOGY;REACTOME\_NEGATIVE\_REGULATION\_OF\_FGFR\_SIGNALING;REACTOME\_INSULIN\_RE

PAIR;REACTOME\_RESOLUTION\_OF\_AP\_SITES\_VIA\_THE\_MULTIPLE\_NUCLEOTIDE\_PATCH\_RE

;REACTOME\_GPCR\_DOWNSTREAM\_SIGNALING;REACTOME\_G\_ALPHA\_S\_SIGNALLING\_EVEI

LOGY;REACTOME\_METABOLISM\_OF\_LIPIDS\_AND\_LIPOPROTEINS;REACTOME\_TRANSCRIPT

TY\_ACID\_BETA\_OXIDATION;REACTOME\_METABOLISM\_OF\_LIPIDS\_AND\_LIPOPROTEINS;RE/  
TY\_ACID\_BETA\_OXIDATION;REACTOME\_METABOLISM\_OF\_LIPIDS\_AND\_LIPOPROTEINS;RE/

REACTOME\_VOLTAGE\_GATED\_POTASSIUM\_CHANNELS;REACTOME\_POTASSIUM\_CHANNEL:

REACTOME\_TANDEM\_PORE\_DOMAIN\_POTASSIUM\_CHANNELS;REACTOME\_POTASSIUM\_CH

GE\_OF\_CELLULAR\_PROTEINS;REACTOME\_CELL\_CELL\_COMMUNICATION;REACTOME\_CASP,

TRANSMITTER\_RELEASE\_CYCLE;REACTOME\_TRANSMISSION\_ACROSS\_CHEMICAL\_SYNAPS

RIPTION;REACTOME\_TRANSCRIPTION;REACTOME\_RNA\_POL\_I\_RNA\_POL\_III\_AND\_MITOCHC

TRANSPORT\_OF\_SMALL\_MOLECULES;REACTOME\_SLC\_MEDIATED\_TRANSMEMBRANE\_TRAN:

RESPIRATORY\_ELECTRON\_TRANSPORT;REACTOME\_RESPIRATORY\_ELECTRON\_TRANSPORT;

EXTRACELLULAR\_MATRIX\_INTERACTIONS;REACTOME\_CELL\_JU

REACTOME\_NGF\_SIGNALLING\_VIA\_TRKA\_FROM\_THE\_PLASMA\_MEMBRANE

REACTOME\_INSULIN\_RECEPTOR\_SIGNALLING\_CASCADE;REACTOME\_SIGNALLING\_TO\_RAS  
AMINOACYLATION;REACTOME\_TRNA\_AMINOACYLATION

PROPHYRINS

EXTRACELLULAR\_MATRIX\_ORGANIZATION;REACTOME\_COLLAGEN\_FORMATION

EXTRACELLULAR\_MATRIX\_ORGANIZATION;REACTOME\_COLLAGEN\_FORMATION

EXTRACELLULAR\_MATRIX\_ORGANIZATION;REACTOME\_COLLAGEN\_FORMATION

REGULATION\_OF\_INSULIN\_LIKE\_GROWTH\_FACTOR\_IGF\_ACTIVITY\_BY\_INSULIN;  
REACTOME\_CELL\_CYCLE\_MITOTIC;REACTOME\_RECRUITMENT\_OF\_MITOTIC\_CENTROSOME\_PROTEIN

REACTOME\_SIGNALING\_BY\_SCF\_KIT;REACTOME\_SIGNALING\_BY\_ERBB4;REACTOME\_SIGN.

ACTOME\_ADAPTIVE\_IMMUNE\_SYSTEM;REACTOME\_CLASS\_I\_MHC\_MEDIATED\_ANTIGEN\_PR  
TRANSMITTER\_RELEASE\_CYCLE;REACTOME\_TRANSMISSION\_ACROSS\_CHEMICAL\_SYNAPS

AMINS\_AND\_COFACTORS

RE\_OF\_CELLULAR\_PROTEINS;REACTOME\_DEVELOPMENTAL\_BIOLOGY;REACTOME\_CELL\_C  
RE\_OF\_CELLULAR\_PROTEINS;REACTOME\_DEVELOPMENTAL\_BIOLOGY;REACTOME\_CELL\_C  
RE\_OF\_CELLULAR\_PROTEINS;REACTOME\_DEVELOPMENTAL\_BIOLOGY;REACTOME\_CELL\_C  
RE\_OF\_CELLULAR\_PROTEINS;REACTOME\_DEVELOPMENTAL\_BIOLOGY;REACTOME\_CELL\_C

NO\_ACIDS\_AND\_DERIVATIVES;REACTOME\_AMINO\_ACID\_SYNTHESIS\_AND\_INTERCONVERS  
NO\_ACIDS\_AND\_DERIVATIVES;REACTOME\_AMINO\_ACID\_SYNTHESIS\_AND\_INTERCONVERS  
PROTEINS;REACTOME\_POST\_TRANSLATIONAL\_PROTEIN\_MODIFICATION;REACTOME\_SYNTHE  
METABOLISM;REACTOME\_METABOLISM\_OF\_LIPIDS\_AND\_LIPOPROTEINS  
METABOLISM;REACTOME\_METABOLISM\_OF\_LIPIDS\_AND\_LIPOPROTEINS  
REACTOME\_ARMS\_MEDIATED\_ACTIVATION;REACTOME\_PROLONGED\_ERK\_ACTIVATION\_E'

SCRIPTION\_INITIATION\_FROM\_TYPE\_2\_PROMOTER;REACTOME\_RNA\_POL\_III\_TRANSCRIPTION  
REACTOME\_SIGNALLING\_TO\_RAS;REACTOME\_NGF\_SIGNALLING\_VIA\_TRKA\_FROM\_THE\_PI

NO\_ACIDS\_AND\_DERIVATIVES;REACTOME\_AMINE\_DERIVED\_HORMONES  
BIOLOGY;REACTOME\_EXTRACELLULAR\_MATRIX\_ORGANIZATION;REACTOME\_COLLAGEN\_FOF  
BIOLOGY;REACTOME\_EXTRACELLULAR\_MATRIX\_ORGANIZATION;REACTOME\_COLLAGEN\_FOF  
BIOLOGY;REACTOME\_EXTRACELLULAR\_MATRIX\_ORGANIZATION;REACTOME\_COLLAGEN\_FOF

'\_FOR\_APOPTOSIS;REACTOME\_TRAF6\_MEDIATED\_IRF7\_ACTIVATION;REACTOME\_TRAF6\_M  
PROTEINS;REACTOME\_POST\_TRANSLATIONAL\_PROTEIN\_MODIFICATION;REACTOME\_ASPARA  
TRANSPORT\_OF\_SMALL\_MOLECULES;REACTOME\_SLC\_MEDIATED\_TRANSMEMBRANE\_TRAN:

:ROID\_HORMONES\_AND\_VITAMINS\_A\_AND\_D;REACTOME\_HDL\_MEDIATED\_LIPID\_TRANSPO  
:ROID\_HORMONES\_AND\_VITAMINS\_A\_AND\_D;REACTOME\_HDL\_MEDIATED\_LIPID\_TRANSPO

FACE\_INTERACTIONS;REACTOME\_P130CAS\_LINKAGE\_TO\_MAPK\_SIGNALING\_FOR\_INTEGRII

BOLISM;REACTOME\_SYNTHESIS\_OF\_PC;REACTOME\_GLYCEROPHOSPHOLIPID\_BIOSYNTHE

TRIX\_ORGANIZATION;REACTOME\_COLLAGEN\_FORMATION

;REACTOME\_OPIOID\_SIGNALLING;REACTOME\_DARPP\_32\_EVENTS



ONS;REACTOME\_XENOBIOTICS;REACTOME\_CYTOCHROME\_P450\_ARRANGED\_BY\_SUBSTR/

\_B\_CELL\_RECEPTOR\_LEADING\_TO\_GENERATION\_OF\_SECOND\_MESSENGERS;REACTOME\_

ICATION;REACTOME\_EXTRACELLULAR\_MATRIX\_ORGANIZATION;REACTOME\_COLLAGEN\_F(

REACTOME\_P75\_NTR\_RECEPTOR\_MEDIATED\_SIGNALLING

)LOGY;REACTOME\_AXON\_GUIDANCE;REACTOME\_NCAM1\_INTERACTIONS;REACTOME\_NCA

)LOGY;REACTOME\_AXON\_GUIDANCE;REACTOME\_NETRIN1\_SIGNALING;REACTOME\_DCC\_M

)LOGY;REACTOME\_AXON\_GUIDANCE;REACTOME\_NETRIN1\_SIGNALING;REACTOME\_DCC\_M

NO\_ACIDS\_AND\_DERIVATIVES;REACTOME\_BIOLOGICAL\_OXIDATIONS;REACTOME\_PHASE1\_

NO\_ACIDS\_AND\_DERIVATIVES;REACTOME\_BIOLOGICAL\_OXIDATIONS;REACTOME\_PHASE1\_

NO\_ACIDS\_AND\_DERIVATIVES;REACTOME\_BIOLOGICAL\_OXIDATIONS;REACTOME\_PHASE1\_

REACTOME\_CROSS\_PRESENTATION\_OF\_SOLUBLE\_EXOGENOUS\_ANTIGENS\_ENDOSOMES;

REACTOME\_DEVELOPMENTAL\_BIOLOGY;REACTOME\_NEF\_MEDIATES\_DOWN\_MODULATION

ATION\_OF\_MUCINS;REACTOME\_TERMINATION\_OF\_O\_GLYCAN\_BIOSYNTHESIS;REACTOME\_

ATION\_OF\_MUCINS;REACTOME\_TERMINATION\_OF\_O\_GLYCAN\_BIOSYNTHESIS;REACTOME\_

ATION\_OF\_MUCINS;REACTOME\_TERMINATION\_OF\_O\_GLYCAN\_BIOSYNTHESIS;REACTOME\_

ATION\_OF\_MUCINS;REACTOME\_TERMINATION\_OF\_O\_GLYCAN\_BIOSYNTHESIS;REACTOME\_

ATION\_OF\_MUCINS;REACTOME\_TERMINATION\_OF\_O\_GLYCAN\_BIOSYNTHESIS;REACTOME\_

NO\_ACIDS\_AND\_DERIVATIVES;REACTOME\_AMINE\_DERIVED\_HORMONES

'\_INTERACTIONS\_BETWEEN\_A\_LYMPHOID\_AND\_A\_NON\_LYMPHOID\_CELL;REACTOME\_IMMI

;REACTOME\_OLFACTORY\_SIGNALING\_PATHWAY;REACTOME\_GPCR\_DOWNSTREAM\_SIGNA

?\_ACTIVATES\_CIRCADIAN\_EXPRESSION;REACTOME\_PPARA\_ACTIVATES\_GENE\_EXPRESSIC

SIGNALLING\_CASCADE;REACTOME\_SIGNALING\_BY\_GPCR;REACTOME\_GPCR\_DOWNSTREA  
:ROID\_HORMONES\_AND\_VITAMINS\_A\_AND\_D;REACTOME\_BIOLOGICAL\_OXIDATIONS;REACT

NO\_ACIDS\_AND\_DERIVATIVES;REACTOME\_AMINE\_DERIVED\_HORMONES

}\_SIGNALLING;REACTOME\_RIP\_MEDIATED\_NFKB\_ACTIVATION\_VIA\_DAI;REACTOME\_GASTRIN  
ISM\_AND\_CITRIC\_ACID\_TCA\_CYCLE;REACTOME\_TCA\_CYCLE\_AND\_RESPIRATORY\_ELECTR  
{ANSPORT\_OF\_SMALL\_MOLECULES;REACTOME\_SLC\_MEDIATED\_TRANSMEMBRANE\_TRAN

;E\_OF\_CELLULAR\_PROTEINS;REACTOME\_CASPASE\_MEDIATED\_CLEAVAGE\_OF\_CYTOSKEL

'NTHESIS;REACTOME\_FATTY\_ACYL\_COA\_BIOSYNTHESIS;REACTOME\_METABOLISM\_OF\_LIP

ME\_CELL\_CYCLE\_MITOTIC;REACTOME\_RECRUITMENT\_OF\_MITOTIC\_CENTROSOME\_PROTEI

;REACTOME\_OLFACTORY\_SIGNALING\_PATHWAY;REACTOME\_GPCR\_DOWNSTREAM\_SIGNA

;REACTOME\_OLFACTORY\_SIGNALING\_PATHWAY;REACTOME\_GPCR\_DOWNSTREAM\_SIGNA  
;REACTOME\_OLFACTORY\_SIGNALING\_PATHWAY;REACTOME\_GPCR\_DOWNSTREAM\_SIGNA  
TO\_3\_EXORIBONUCLEASE;REACTOME\_METABOLISM\_OF\_MRNA;REACTOME\_DEADENYLATIC

ENE\_EXPRESSION;REACTOME\_ALPHA\_LINOLENIC\_ACID\_ALA\_METABOLISM;REACTOME\_ME

PPED\_INTRON\_CONTAINING\_PRE\_MRNA;REACTOME\_TRANSPORT\_OF\_MATURE\_TRANSCRI

REACTOME\_SIGNALING\_BY\_SCF\_KIT;REACTOME\_SIGNALING\_BY\_ERBB4;REACTOME\_SIGN.  
OWN\_GLYCOGENOLYSIS;REACTOME\_METABOLISM\_OF\_CARBOHYDRATES;REACTOME\_GLU  
3;REACTOME\_ACTIVATION\_OF\_CHAPERONE\_GENES\_BY\_XBP1S;REACTOME\_UNFOLDED\_PF

\_PRE\_REPLICATIVE\_COMPLEX;REACTOME\_CELL\_CYCLE;REACTOME\_PROCESSIVE\_SYNTHESIS;  
REACTOME\_TANDEM\_PORE\_DOMAIN\_POTASSIUM\_CHANNELS;REACTOME\_POTASSIUM\_CHANNELS

REACTOME\_IMMUNE\_SYSTEM;REACTOME\_ADAPTIVE\_IMMUNE\_SYSTEM  
REACTOME\_IMMUNE\_SYSTEM;REACTOME\_ADAPTIVE\_IMMUNE\_SYSTEM

ANTIGEN\_PRESENTATION;REACTOME\_FACTORS\_INVOLVED\_IN\_MEGAKARYOCYTE\_DEVELOPMENT

REGULATION\_OF\_TGF\_BETA\_RECEPTOR\_SIGNALING;REACTOME\_TGF\_BETA\_RECEPTOR\_SIGNALING\_ACTIVATION;  
RESPIRATORY\_ELECTRON\_TRANSPORT;REACTOME\_RESPIRATORY\_ELECTRON\_TRANSPORT;  
RECYCLING;REACTOME\_LATENT\_INFECTION\_OF\_HOMO\_SAPIENS\_WITH\_MYCOBACTERIUM

LIPOIDS\_AND\_LIPOPROTEINS;REACTOME\_CHOLESTEROL\_BIOSYNTHESIS

GTPASES

PHOSPHOLIPID\_METABOLISM;REACTOME\_PHOSPHOLIPID\_METABOLISM;REACTOME\_SPHINGOLIPID\_METABOLISM;  
TRANSPORT\_OF\_SMALL\_MOLECULES;REACTOME\_SLC\_MEDIATED\_TRANSMEMBRANE\_TRANSPORT

ANTIGEN\_PRESENTATION;REACTOME\_IMMUNE\_SYSTEM;REACTOME\_ADAPTIVE\_IMMUNE\_SYSTEM;  
GUANYLATE\_CYCLASE;REACTOME\_PLATELET\_HOMEOSTASIS;REACTOME\_HEMOSTASIS

REACTOME\_HIV\_INFECTION;REACTOME\_HOST\_INTERACTIONS\_OF\_HIV\_FACTORS;REACTOME\_NUCLEIC\_ACIDS\_AND\_DERIVATIVES;  
REACTOME\_BRANCHED\_CHAIN\_AMINO\_ACID\_CATABOLISM;REACTOME\_CELL\_CYCLE;REACTOME\_P53\_INDEPENDENT\_G1\_S\_DNA\_DAMAGE\_CHECKPOINT;REACTOME

REACTOME\_CELL\_CYCLE\_MITOTIC;REACTOME\_MITOTIC\_M\_M\_G1\_PHASES;REACTOME\_DNA\_REPLICATION;  
REACTOME\_ADHERENS\_JUNCTIONS\_INTERACTIONS;REACTOME\_CELL\_CELL\_JUNCTIONS

DEVELOPMENTAL\_BIOLOGY;REACTOME\_AXON\_GUIDANCE;REACTOME\_L1CAM\_INTERACTIONS;REACTOME\_INTE

TRANSPORT;REACTOME\_MEMBRANE\_TRAFFICKING

5'-3' EXORIBONUCLEASE;REACTOME\_METABOLISM\_OF\_MRNA;REACTOME\_DEADENYLATION;  
GTPASES;REACTOME\_SIGNALING\_BY\_NGF;REACTOME\_DEVELOPMENTAL\_BIOLOGY;REACTOME

GTPASES;REACTOME\_SIGNALLING\_BY\_NGF;REACTOME\_DEVELOPMENTAL\_BIOLOGY;REAC  
;REACTOME\_OLFACTORY\_SIGNALING\_PATHWAY;REACTOME\_GPCR\_DOWNSTREAM\_SIGNA

ME\_CELL\_CYCLE\_MITOTIC;REACTOME\_G1\_PHASE;REACTOME\_MITOTIC\_G1\_G1\_S\_PHASES

REACTOME\_VOLTAGE\_GATED\_POTASSIUM\_CHANNELS;REACTOME\_POTASSIUM\_CHANNEL:  
'\_FOR\_APOPTOSIS;REACTOME\_APOPTOSIS

N\_MODULATION\_OF\_CELL\_SURFACE\_RECEPTORS\_BY\_RECRUITING\_THEM\_TO\_CLATHRIN\_

\_AT\_THE\_GOLGI\_MEMBRANE;REACTOME\_PHOSPHOLIPID\_METABOLISM;REACTOME\_SYNT  
\_AT\_THE\_GOLGI\_MEMBRANE;REACTOME\_PHOSPHOLIPID\_METABOLISM;REACTOME\_SYNT

\_SALT\_METABOLISM;REACTOME\_RECYCLING\_OF\_BILE\_ACIDS\_AND\_SALTS;REACTOME\_TRA

ATION\_OF\_MUCINS;REACTOME\_TERMINATION\_OF\_O\_GLYCAN\_BIOSYNTHESIS;REACTOME  
ATION\_OF\_MUCINS;REACTOME\_TERMINATION\_OF\_O\_GLYCAN\_BIOSYNTHESIS;REACTOME

REACTOME\_DAG\_AND\_IP3\_SIGNALING;REACTOME\_SIGNALING\_BY\_ERBB2;REACTOME\_SIG

'\_INTERACTIONS\_BETWEEN\_A\_LYMPHOID\_AND\_A\_NON\_LYMPHOID\_CELL;REACTOME\_INTE

IC\_CCT\_WITH\_TARGET\_PROTEINS\_DURING\_BIOSYNTHESIS;REACTOME\_PREFOLDIN\_MEDI

:ONTRACTION;REACTOME\_MUSCLE\_CONTRACTION  
E\_AND\_DEGRADATION;REACTOME\_HYALURONAN\_METABOLISM;REACTOME\_GLYCOSAMIN  
AIR;REACTOME\_RESOLUTION\_OF\_AP\_SITES\_VIA\_THE\_MULTIPLE\_NUCLEOTIDE\_PATCH\_RE

LOGY;REACTOME\_PPARA\_ACTIVATES\_GENE\_EXPRESSION;REACTOME\_METABOLISM\_OF\_OF\_HOMO\_SAPIENS\_WITH\_MYCOBACTERIUM\_TUBERCULOSIS;REACTOME\_NITRIC\_OXIDE\_9

TEINS;REACTOME\_POST\_TRANSLATIONAL\_PROTEIN\_MODIFICATION;REACTOME\_AS PARA\_SIGNALING;REACTOME\_INTERFERON\_ALPHA\_BETA\_SIGNALING;REACTOME\_INTERFERON

ME\_CELL\_CYCLE\_MITOTIC;REACTOME\_MITOTIC\_M\_M\_G1\_PHASES;REACTOME\_DNA\_REPLI ME\_CELL\_CYCLE\_MITOTIC;REACTOME\_MITOTIC\_M\_M\_G1\_PHASES;REACTOME\_DNA\_REPLI KING;REACTOME\_TRANS\_GOLGI\_NETWORK\_VESICLE\_BUDDING;REACTOME\_GOLGI\_ASSOC

ATION\_OF\_MUCINS;REACTOME\_METABOLISM\_OF\_PROTEINS;REACTOME\_POST\_TRANSLA IN\_DISEASE;REACTOME\_SIGNALING\_BY\_FGFR1\_MUTANTS;REACTOME\_SIGNALING\_BY\_FG

ME\_CELL\_CYCLE\_MITOTIC;REACTOME\_CELL\_CYCLE\_CHECKPOINTS;REACTOME\_TRANSCR

TY\_ACID\_BETA\_OXIDATION;REACTOME\_METABOLISM\_OF\_LIPIDS\_AND\_LIPOPROTEINS;REA

LOGY;REACTOME\_EXTRACELLULAR\_MATRIX\_ORGANIZATION;REACTOME\_COLLAGEN\_FOF  
IA\_AMINOACYLATION;REACTOME\_TRNA\_AMINOACYLATION

RIPTION;REACTOME\_TRANSCRIPTION;REACTOME\_FORMATION\_OF\_RNA\_POL\_II\_ELONGATI  
REACTIONS\_AT\_THE\_VASCULAR\_WALL;REACTOME\_BASIGIN\_INTERACTIONS;REACTOME\_AN

THWAY;REACTOME\_DNA\_REPAIR

;REACTOME\_CLASS\_A1\_RHODOPSIN\_LIKE\_RECEPTORS;REACTOME\_EICOSANOID\_LIGAND\_

AMINS\_AND\_COFACTORS

AMINS\_AND\_COFACTORS

ICATION;REACTOME\_RESPONSE\_TO\_ELEVATED\_PLATELET\_CYTOSOLIC\_CA2\_;REACTOME\_

EAK\_REPAIR;REACTOME\_DNA\_REPAIR

ALLING\_PATHWAY\_VIA\_PKC\_AND\_MAPK;REACTOME\_SIGNALING\_BY\_GPCR;REACTOME\_CL

.BETA\_SIGNALING;REACTOME\_INTERFERON\_SIGNALING;REACTOME\_IMMUNE\_SYSTEM;RE/

OGENESIS;REACTOME\_REGULATORY\_RNA\_PATHWAYS

.TRANSMITS\_SIGNAL\_TO\_THE\_NUCLEUS;REACTOME\_SIGNALING\_BY\_NOTCH1;REACTOME\_

EN\_PRESENTATION;REACTOME\_FACTORS\_INVOLVED\_IN\_MEGAKARYOCYTE\_DEVELOPME

REACTOME\_SIGNALING\_BY\_SCF\_KIT;REACTOME\_DEVELOPMENTAL\_BIOLOGY;REACTOME\_

.TRANSMITS\_SIGNAL\_TO\_THE\_NUCLEUS;REACTOME\_SIGNALING\_BY\_NOTCH4;REACTOME\_  
RIPTION\_INITIATION\_FROM\_TYPE\_2\_PROMOTER;REACTOME\_RNA\_POL\_III\_TRANSCRIPTION

TRANSPORT\_OF\_SMALL\_MOLECULES;REACTOME\_ION\_TRANSPORT\_BY\_P\_TYPE\_ATPASES;R  
ACTOME\_ADAPTIVE\_IMMUNE\_SYSTEM;REACTOME\_CLASS\_I\_MHC\_MEDIATED\_ANTIGEN\_PR  
ACTOME\_ADAPTIVE\_IMMUNE\_SYSTEM;REACTOME\_CLASS\_I\_MHC\_MEDIATED\_ANTIGEN\_PR

CESS\_CHEMICAL\_SYNAPSES;REACTOME\_NEURONAL\_SYSTEM;REACTOME\_NEUROTRANSMIT

LOGY;REACTOME\_AXON\_GUIDANCE;REACTOME\_ACTIVATION\_OF\_RAC;REACTOME\_SIGNA  
ALLING\_PATHWAY\_VIA\_PKC\_AND\_MAPK;REACTOME\_TRANSMISSION\_ACROSS\_CHEMICAL\_  
LOGY;REACTOME\_AXON\_GUIDANCE;REACTOME\_NCAM\_SIGNALING\_FOR\_NEURITE\_OUT\_C  
LOGY;REACTOME\_AXON\_GUIDANCE;REACTOME\_NCAM\_SIGNALING\_FOR\_NEURITE\_OUT\_C

NO\_ACIDS\_AND\_DERIVATIVES



DEVELOPMENTAL\_BIOLOGY;REACTOME\_METABOLISM\_OF\_PROTEINS;REACTOME\_AXON\_GUIDANCE;REACTOME\_CELL\_SURFACE\_INTERACTIONS;CELL\_SURFACE\_INTERACTIONS

TRANSPORT\_OF\_SMALL\_MOLECULES;REACTOME\_ION\_TRANSPORT\_BY\_P\_TYPE\_ATPASES;R

INSULIN;REACTOME\_INSULIN\_SYNTHESIS\_AND\_PROCESSING;TRANSPORT\_OF\_SMALL\_MOLECULES;REACTOME\_PASSIVE\_TRANSPORT\_BY\_AQUAPORINS;F

CELL\_SURFACE\_INTERACTIONS

STEROID\_HORMONES\_AND\_VITAMINS\_A\_AND\_D;REACTOME\_BIOLOGICAL\_OXIDATIONS;REACT

NUCLEIC\_ACIDS\_AND\_DERIVATIVES

GTPASES;REACTOME\_SIGNALLING\_BY\_NGF;REACTOME\_NRAGE\_SIGNALS\_DEATH\_THROUGH

TRANSPORT\_OF\_SMALL\_MOLECULES;REACTOME\_SLC\_MEDIATED\_TRANSMEMBRANE\_TRAN

REACTOME\_DEVELOPMENTAL\_BIOLOGY;REACTOME\_SIGNALING\_BY\_NODAL

;REACTOME\_GPCR\_DOWNSTREAM\_SIGNALING;REACTOME\_G\_ALPHA\_I\_SIGNALLING\_EVEN

GTPASES

;REACTOME\_PEPTIDE\_LIGAND\_BINDING\_RECEPTORS;REACTOME\_CLASS\_A1\_RHODOPSIN\_CELL\_CYCLE;REACTOME\_CHROMOSOME\_MAINTENANCE;REACTOME\_MEIOTIC\_SYNOPSIS

OME\_SRP\_DEPENDENT\_COTRANSLATIONAL\_PROTEIN\_TARGETING\_TO\_MEMBRANE;REACTO  
TEIN\_IMPORT;REACTOME\_METABOLISM\_OF\_PROTEINS

LOGY;REACTOME\_MYOGENESIS

TION\_PATHWAY

LOGY;REACTOME\_BMAL1\_CLOCK\_NPAS2\_ACTIVATES\_CIRCADIAN\_EXPRESSION;REACTOM  
LOGY;REACTOME\_BMAL1\_CLOCK\_NPAS2\_ACTIVATES\_CIRCADIAN\_EXPRESSION;REACTOM  
LOGY;REACTOME\_BMAL1\_CLOCK\_NPAS2\_ACTIVATES\_CIRCADIAN\_EXPRESSION;REACTOM  
REACTOME\_DAG\_AND\_IP3\_SIGNALING;REACTOME\_SIGNALING\_BY\_ERBB2;REACTOME\_SIG

\_SIGNALING;REACTOME\_INTERFERON\_SIGNALING;REACTOME\_IMMUNE\_SYSTEM;REACTOI  
\_SIGNALING;REACTOME\_INTERFERON\_SIGNALING;REACTOME\_IMMUNE\_SYSTEM;REACTOI

VS\_MEDIATED\_TRANSPORT;REACTOME\_TRANSMEMBRANE\_TRANSPORT\_OF\_SMALL\_MOLE  
NA;REACTOME\_METABOLISM\_OF\_RNA;REACTOME\_NONSENSE\_MEDIATED\_DECAY\_ENHAN

SIGNALLING\_CASCADE;REACTOME\_PKB\_MEDIATED\_EVENTS;REACTOME\_SIGNALING\_BY\_IFN

SION\_AND\_PROCESSING;REACTOME\_PRE\_NOTCH\_PROCESSING\_IN\_GOLGI;REACTOME\_TF

RACTIONS\_AT\_THE\_VASCULAR\_WALL;REACTOME\_INTEGRIN\_CELL\_SURFACE\_INTERACTIO  
TION\_PATHWAY

OWN\_GLYCOGENOLYSIS;REACTOME\_METABOLISM\_OF\_CARBOHYDRATES;REACTOME\_GLU

V\_CODING\_RNA;REACTOME\_ANTIVIRAL\_MECHANISM\_BY\_IFN\_STIMULATED\_GENES;REACTO

NON\_CODING\_RNA;REACTOME\_ANTIVIRAL\_MECHANISM\_BY\_IFN\_STIMULATED\_GENES;REACTOME\_TRANSPORT;REACTOME\_METABOLISM\_OF\_LIPIDS\_AND\_LIPOPROTEINS;REACTOME\_LIPID

TRANSPORT\_OF\_SMALL\_MOLECULES;REACTOME\_SLC\_MEDIATED\_TRANSMEMBRANE\_TRANSPORT

TRANSPORT\_OF\_SMALL\_MOLECULES;REACTOME\_SLC\_MEDIATED\_TRANSMEMBRANE\_TRANSPORT;  
CELL\_CYCLE;REACTOME\_CHROMOSOME\_MAINTENANCE;REACTOME\_MEIOTIC\_SYNAPSIS;F

FACE\_INTERACTIONS;REACTOME\_P130CAS\_LINKAGE\_TO\_MAPK\_SIGNALING\_FOR\_INTEGRIN  
B\_CELL\_RECEPTOR\_LEADING\_TO\_GENERATION\_OF\_SECOND\_MESSENGERS;REACTOME  
TRANSCRIPTION\_TERMINATION;REACTOME\_RNA\_POL\_I\_TRANSCRIPTION;REACTOME\_TRANSCRIPTI

AND\_LIPOPROTEINS;REACTOME\_CHOLESTEROL\_BIOSYNTHESIS

SPLED\_INTRON\_CONTAINING\_PRE\_MRNA;REACTOME\_MRNA\_PROCESSING;REACTOME\_MRNA

NA;REACTOME\_METABOLISM\_OF\_RNA;REACTOME\_NONSENSE\_MEDIATED\_DECAY\_ENHANCEMENT;  
NA;REACTOME\_METABOLISM\_OF\_RNA;REACTOME\_NONSENSE\_MEDIATED\_DECAY\_ENHANCEMENT

ROSS\_CHEMICAL\_SYNAPSES;REACTOME\_NEURONAL\_SYSTEM;REACTOME\_NEUROTRANSMITTER;  
REACTOME\_ADAPTIVE\_IMMUNE\_SYSTEM;REACTOME\_CLASS\_I\_MHC\_MEDIATED\_ANTIGEN\_PRESENTATION

TRANSPORT\_OF\_SMALL\_MOLECULES;REACTOME\_SLC\_MEDIATED\_TRANSMEMBRANE\_TRAN

NOGENESIS;REACTOME\_REGULATORY\_RNA\_PATHWAYS;REACTOME\_PROCESSING\_OF\_CAF

BOLISM;REACTOME\_SYNTHESIS\_OF\_PIPS\_AT\_THE\_PLASMA\_MEMBRANE;REACTOME\_PI\_M

SIS;REACTOME\_HEPARAN\_SULFATE\_HEPARIN\_HS\_GAG\_METABOLISM;REACTOME\_GLYCOS

NOLOGY;REACTOME\_BMAL1\_CLOCK\_NPAS2\_ACTIVATES\_CIRCADIAN\_EXPRESSION;REACTOM

NOLOGY;REACTOME\_BMAL1\_CLOCK\_NPAS2\_ACTIVATES\_CIRCADIAN\_EXPRESSION;REACTOM

NO SIGNALING;REACTOME\_MAP\_KINASE\_ACTIVATION\_IN\_TLR\_CASCADE;REACTOME\_ACTIVA

NOF\_HOMO\_SAPIENS\_WITH\_MYCOBACTERIUM\_TUBERCULOSIS;REACTOME\_NITRIC\_OXIDE\_S

TRANSPORT\_OF\_SMALL\_MOLECULES;REACTOME\_SLC\_MEDIATED\_TRANSMEMBRANE\_TRAN

TRANSPORT\_OF\_SMALL\_MOLECULES;REACTOME\_SLC\_MEDIATED\_TRANSMEMBRANE\_TRAN

\_IN\_DISEASE;REACTOME\_SIGNALING\_BY\_FGFR1\_MUTANTS;REACTOME\_SIGNALING\_BY\_FG

REACTOME\_DEVELOPMENTAL\_BIOLOGY;REACTOME\_NEF\_MEDIATES\_DOWN\_MODULATION

NOLOGY;REACTOME\_TRANSMISSION\_ACROSS\_CHEMICAL\_SYNAPSES;REACTOME\_NEURONA

OME\_SRP\_DEPENDENT\_COTRANSLATIONAL\_PROTEIN\_TARGETING\_TO\_MEMBRANE;REACT

LOGY;REACTOME\_DOWNREGULATION\_OF\_ERBB2\_ERBB3\_SIGNALING;REACTOME\_SIGNALING;  
;REACTOME\_PEPTIDE\_LIGAND\_BINDING\_RECEPTORS;REACTOME\_CLASS\_A1\_RHODOPSIN\_S

REACTOME\_SIGNALING\_BY\_SCF\_KIT;REACTOME\_GROWTH\_HORMONE\_RECEPTOR\_SIGNALING;  
REACTOME\_SIGNALING\_BY\_SCF\_KIT;REACTOME\_GROWTH\_HORMONE\_RECEPTOR\_SIGNALING;  
REACTOME\_SIGNALING\_BY\_SCF\_KIT;REACTOME\_GROWTH\_HORMONE\_RECEPTOR\_SIGNALING;  
HENATE\_METABOLISM;REACTOME\_METABOLISM\_OF\_VITAMINS\_AND\_COFACTORS

CLASS\_CHEMICAL\_SYNAPSES;REACTOME\_NEURONAL\_SYSTEM;REACTOME\_NEUROTRANSMITTER;  
REACTOME\_ADAPTIVE\_IMMUNE\_SYSTEM;REACTOME\_CLASS\_I\_MHC\_MEDIATED\_ANTIGEN\_PRESENTATION

LOGY;REACTOME\_EXTRACELLULAR\_MATRIX\_ORGANIZATION;REACTOME\_CELL\_SURFACE

FACTORS\_INVOLVED\_IN\_MEGAKARYOCYTE\_DEVELOPMENT\_AND\_PLATELET\_PRODUCTION;  
REACTOME\_RECEPTOR\_SIGNALING;REACTOME\_SIGNALING\_BY\_ERBB4;REACTOME\_PROLACTIN\_RECEPTOR;  
LOGY;REACTOME\_AXON\_GUIDANCE;REACTOME\_L1CAM\_INTERACTIONS;REACTOME\_INTEGRIN

S\_IN\_LIPID\_HOMEOSTASIS;REACTOME\_ABC\_FAMILY\_PROTEINS\_MEDIATED\_TRANSPORT;REACTOME

SIGNALLING\_CASCADE;REACTOME\_REGULATION\_OF\_AMPK\_ACTIVITY\_VIA\_LKB1;REACTOM

ENATE\_METABOLISM;REACTOME\_METABOLISM\_OF\_VITAMINS\_AND\_COFACTORS;REACTC  
ENATE\_METABOLISM;REACTOME\_METABOLISM\_OF\_VITAMINS\_AND\_COFACTORS;REACTC

REACTOME\_NGF\_SIGNALLING\_VIA\_TRKA\_FROM\_THE\_PLASMA\_MEMBRANE;REACTOME\_SIC  
ME\_CELL\_CYCLE\_MITOTIC;REACTOME\_MITOTIC\_M\_M\_G1\_PHASES;REACTOME\_DNA\_REPLI

ME\_CELL\_CYCLE\_MITOTIC;REACTOME\_RECRUITMENT\_OF\_MITOTIC\_CENTROSOME\_PROTEI  
;REACTOME\_PEPTIDE\_LIGAND\_BINDING\_RECEPTORS;REACTOME\_CLASS\_A1\_RHODOPSIN\_

ICATION;REACTOME\_CELL\_JUNCTION\_ORGANIZATION

TRANSPORT\_OF\_SMALL\_MOLECULES;REACTOME\_AQUAPORIN\_MEDIATED\_TRANSPORT;REA

TRANSPORT\_OF\_SMALL\_MOLECULES;REACTOME\_ION\_TRANSPORT\_BY\_P\_TYPE\_ATPASES;R

ISM\_AND\_CITRIC\_ACID\_TCA\_CYCLE;REACTOME\_TCA\_CYCLE\_AND\_RESPIRATORY\_ELECTR  
CTOME\_RNA\_POL\_I\_RNA\_POL\_III\_AND\_MITOCHONDRIAL\_TRANSCRIPTION  
CTOME\_RNA\_POL\_I\_RNA\_POL\_III\_AND\_MITOCHONDRIAL\_TRANSCRIPTION

SPLED\_INTRON\_CONTAINING\_PRE\_MRNA;REACTOME\_MRNA\_PROCESSING;REACTOME\_MR  
GTPASES  
RIPTION\_INITIATION\_FROM\_TYPE\_2\_PROMOTER;REACTOME\_MICRORNA\_MIRNA\_BIOGENE:

;REACTOME\_CLASS\_A1\_RHODOPSIN\_LIKE\_RECEPTORS;REACTOME\_GPCR\_DOWNSTREAM

GTPASES;REACTOME\_SIGNALLING\_BY\_NGF;REACTOME\_SIGNALING\_BY\_SCF\_KIT;REACTOM  
GTPASES;REACTOME\_SIGNALLING\_BY\_NGF;REACTOME\_TGF\_BETA\_RECEPTOR\_SIGNALIN  
IPLED\_NER\_TC\_NER;REACTOME\_NUCLEOTIDE\_EXCISION\_REPAIR;REACTOME\_FORMATION  
IPLED\_NER\_TC\_NER;REACTOME\_NUCLEOTIDE\_EXCISION\_REPAIR;REACTOME\_FORMATION

ATION\_OF\_MUCINS;REACTOME\_TERMINATION\_OF\_O\_GLYCAN\_BIOSYNTHESIS;REACTOME  
ATION\_OF\_MUCINS;REACTOME\_TERMINATION\_OF\_O\_GLYCAN\_BIOSYNTHESIS;REACTOME  
ATION\_OF\_MUCINS;REACTOME\_TERMINATION\_OF\_O\_GLYCAN\_BIOSYNTHESIS;REACTOME  
;M\_BY\_IFN\_STIMULATED\_GENES;REACTOME\_INTERFERON\_SIGNALING;REACTOME\_NEGAT



ALLING\_PATHWAY\_VIA\_PKC\_AND\_MAPK;REACTOME\_SIGNALING\_BY\_GPCR;REACTOME\_CL  
'\_INTERACTIONS\_BETWEEN\_A\_LYMPHOID\_AND\_A\_NON\_LYMPHOID\_CELL;REACTOME\_INTE  
:ACTOME\_INTERFERON\_ALPHA\_BETA\_SIGNALING;REACTOME\_REGULATION\_OF\_IFNA\_SIGI

DS\_AND\_LIPOPROTEINS;REACTOME\_LIPID\_DIGESTION\_MOBILIZATION\_AND\_TRANSPORT;F  
DS\_AND\_LIPOPROTEINS;REACTOME\_LIPID\_DIGESTION\_MOBILIZATION\_AND\_TRANSPORT;F  
\_IN\_MEGAKARYOCYTE\_DEVELOPMENT\_AND\_PLATELET\_PRODUCTION;REACTOME\_HEMOST

REACTOME\_DAG\_AND\_IP3\_SIGNALING;REACTOME\_CELL\_CYCLE;REACTOME\_SIGNALING\_E  
;REACTOME\_OLFACTORY\_SIGNALING\_PATHWAY;REACTOME\_GPCR\_DOWNSTREAM\_SIGNA  
\_IN\_CANCER;REACTOME\_EGFR\_DOWNREGULATION

GTPASES

;REACTOME\_OPIOID\_SIGNALLING;REACTOME\_DARPP\_32\_EVENTS;REACTOME\_GPCR\_DOW

'TION\_PATHWAY

ME\_GLUCONEOGENESIS;REACTOME\_METABOLISM\_OF\_CARBOHYDRATES;REACTOME\_GLI

'TION\_PATHWAY

PPED\_INTRON\_CONTAINING\_PRE\_MRNA;REACTOME\_MRNA\_PROCESSING;REACTOME\_MR

PPED\_INTRON\_CONTAINING\_PRE\_MRNA;REACTOME\_MRNA\_PROCESSING;REACTOME\_MR  
OLOGY;REACTOME\_TGF\_BETA\_RECEPTOR\_SIGNALING\_IN\_EMT\_EPITHELIAL\_TO\_MESENCH  
REACTOME\_P75\_NTR\_RECEPTOR\_MEDIATED\_SIGNALLING;REACTOME\_SIGNALING\_BY\_GP

TION\_PATHWAY  
TION\_PATHWAY

ROTEIN\_IMPORT;REACTOME\_METABOLISM\_OF\_PROTEINS  
ALLING\_PATHWAY\_VIA\_PKC\_AND\_MAPK;REACTOME\_SIGNALING\_BY\_GPCR;REACTOME\_CL

TRANSPORT\_OF\_SMALL\_MOLECULES;REACTOME\_SLC\_MEDIATED\_TRANSMEMBRANE\_TRAN:

DVO\_BIOSYNTHESIS;REACTOME\_PHOSPHOLIPID\_METABOLISM;REACTOME\_SPHINGOLIPID\_

PPED\_INTRON\_CONTAINING\_PRE\_MRNA;REACTOME\_MRNA\_PROCESSING;REACTOME\_MR  
PPED\_INTRON\_CONTAINING\_PRE\_MRNA;REACTOME\_MRNA\_PROCESSING;REACTOME\_MR

OLOGY;REACTOME\_AXON\_GUIDANCE;REACTOME\_SEMA4D\_IN\_SEMAPHORIN\_SIGNALING;RE  
TION\_PATHWAY;REACTOME\_NUCLEAR\_RECEPTOR\_TRANSCRIPTION\_PATHWAY  
AIR;REACTOME\_RESOLUTION\_OF\_AP\_SITES\_VIA\_THE\_MULTIPLE\_NUCLEOTIDE\_PATCH\_RE  
AIR;REACTOME\_RESOLUTION\_OF\_AP\_SITES\_VIA\_THE\_MULTIPLE\_NUCLEOTIDE\_PATCH\_RE  
AIR;REACTOME\_RESOLUTION\_OF\_AP\_SITES\_VIA\_THE\_MULTIPLE\_NUCLEOTIDE\_PATCH\_RE

CONTRACTION;REACTOME\_MUSCLE\_CONTRACTION  
CONTRACTION;REACTOME\_MUSCLE\_CONTRACTION

DISS\_CHEMICAL\_SYNAPSES;REACTOME\_NEURONAL\_SYSTEM;REACTOME\_NEUROTRANSMIT

TION\_PATHWAY;REACTOME\_INTERACTIONS\_BETWEEN\_A\_LYMPHOID\_AND\_A\_NON\_LYMPHOID\_CELL;REACTOME\_IMM

UNITY\_METABOLISM;REACTOME\_REGULATION\_OF\_INSULIN\_SECRETION

REACTOME\_TUBULIN\_PATHWAY

REACTOME\_TUBULIN\_PATHWAY

REACTOME\_TUBULIN\_PATHWAY

REACTOME\_CELL\_SURFACE\_INTERACTIONS\_AT\_THE\_VASCULAR\_WALL;REACTOME

PROTEIN\_CCT\_WITH\_TARGET\_PROTEINS\_DURING\_BIOSYNTHESIS;REACTOME\_PROTEIN\_FOLDING

REACTOME\_AXON\_GUIDANCE;REACTOME\_NCAM1\_INTERACTIONS;REACTOME\_NCA

REACTOME\_PROTEIN\_SYNTHESIS;REACTOME\_POST\_TRANSLATIONAL\_MODIFICATION\_SYNTHESIS\_OF\_GPI\_ANCHORE

REACTOME\_CELL\_CYCLE\_MITOTIC;REACTOME\_RECRUITMENT\_OF\_MITOTIC\_CENTROSOME\_PROTEI  
AMINS\_AND\_COFACTORS

DISS\_CHEMICAL\_SYNAPSES;REACTOME\_NEURONAL\_SYSTEM;REACTOME\_NEUROTRANSMIT

REACTOME\_DEVELOPMENTAL\_BIOLOGY;REACTOME\_DAG\_AND\_IP3\_SIGNALING;REACTOME

TRANSPORT\_OF\_SMALL\_MOLECULES;REACTOME\_SLC\_MEDIATED\_TRANSMEMBRANE\_TRAN

TRANSPORT\_OF\_SMALL\_MOLECULES;REACTOME\_SLC\_MEDIATED\_TRANSMEMBRANE\_TRAN

REACTOME\_VOLTAGE\_GATED\_POTASSIUM\_CHANNELS;REACTOME\_POTASSIUM\_CHANNEL;  
TRANSPORT\_OF\_SMALL\_MOLECULES;REACTOME\_ION\_TRANSPORT\_BY\_P\_TYPE\_ATPASES;R

;REACTOME\_INTEGRATION\_OF\_ENERGY\_METABOLISM;REACTOME\_TRANSMEMBRANE\_TR  
;REACTOME\_INTEGRATION\_OF\_ENERGY\_METABOLISM;REACTOME\_TRANSMEMBRANE\_TR  
CELL\_CYCLE;REACTOME\_CHROMOSOME\_MAINTENANCE;REACTOME\_MEIOTIC\_SYNAPSIS

LOGY;REACTOME\_EXTRACELLULAR\_MATRIX\_ORGANIZATION;REACTOME\_COLLAGEN\_FOF  
LOGY;REACTOME\_EXTRACELLULAR\_MATRIX\_ORGANIZATION;REACTOME\_COLLAGEN\_FOF  
NSPORT;REACTOME\_MEMBRANE\_TRAFFICKING;REACTOME\_DIABETES\_PATHWAYS;REACT

REACTIONS\_AT\_THE\_VASCULAR\_WALL;REACTOME\_INTEGRIN\_CELL\_SURFACE\_INTERACTIO  
SIGNALING;REACTOME\_RIP\_MEDIATED\_NFKB\_ACTIVATION\_VIA\_DAI;REACTOME\_GASTRIN

BOLISM;REACTOME\_SYNTHESIS\_OF\_PIPS\_AT\_THE\_PLASMA\_MEMBRANE;REACTOME\_PI\_M

BETA\_SIGNALING;REACTOME\_REGULATION\_OF\_IFNA\_SIGNALING;REACTOME\_INTERFERON  
GTPASES;REACTOME\_SIGNALLING\_BY\_NGF;REACTOME\_NRAGE\_SIGNALS\_DEATH\_THROU

ICATION;REACTOME\_DSCAM\_INTERACTIONS  
ICATION;REACTOME\_DSCAM\_INTERACTIONS  
ICATION;REACTOME\_DSCAM\_INTERACTIONS  
ICATION;REACTOME\_DSCAM\_INTERACTIONS

PPED\_INTRON\_CONTAINING\_PRE\_MRNA;REACTOME\_TRANSPORT\_OF\_MATURE\_TRANSCRI

'\_INTERACTIONS\_BETWEEN\_A\_LYMPHOID\_AND\_A\_NON\_LYMPHOID\_CELL;REACTOME\_CELL  
AMINS\_AND\_COFACTORS  
OLOGY;REACTOME\_EXTRACELLULAR\_MATRIX\_ORGANIZATION;REACTOME\_COLLAGEN\_FOF  
NO\_ACIDS\_AND\_DERIVATIVES

ME\_CELL\_CYCLE\_MITOTIC;REACTOME\_RECRUITMENT\_OF\_MITOTIC\_CENTROSOME\_PROTEI

\_AT\_THE\_GOLGI\_MEMBRANE;REACTOME\_PHOSPHOLIPID\_METABOLISM;REACTOME\_PI\_ME

REACTOME\_NGF\_SIGNALLING\_VIA\_TRKA\_FROM\_THE\_PLASMA\_MEMBRANE;REACTOME\_SIC  
ISM;REACTOME\_METABOLISM\_OF\_NUCLEOTIDES;REACTOME\_PYRIMIDINE\_METABOLISM  
ONS;REACTOME\_GLUTATHIONE\_CONJUGATION;REACTOME\_PHASE\_II\_CONJUGATION

\_PRE\_REPLICATIVE\_COMPLEX;REACTOME\_CELL\_CYCLE;REACTOME\_ORC1\_REMOVAL\_FRC  
OLOGY;REACTOME\_AXON\_GUIDANCE;REACTOME\_SEMA4D\_IN\_SEMAPHORIN\_SIGNALING;RE  
:ACTOME\_IL\_3\_5\_AND\_GM-CSF\_SIGNALING;REACTOME\_IL\_RECEPTOR\_SHC\_SIGNALING;RE

ELLING\_OF\_PC;REACTOME\_PHOSPHOLIPID\_METABOLISM;REACTOME\_ACYL\_CHAIN\_REMOI  
IN\_MEGAKARYOCYTE\_DEVELOPMENT\_AND\_PLATELET\_PRODUCTION;REACTOME\_HEMOST

YSS\_CHEMICAL\_SYNAPSES;REACTOME\_NEURONAL\_SYSTEM;REACTOME\_NEUROTRANSMIT  
YSS\_CHEMICAL\_SYNAPSES;REACTOME\_NEURONAL\_SYSTEM;REACTOME\_NEUROTRANSMIT

YLOGY;REACTOME\_AXON\_GUIDANCE;REACTOME\_NCAM1\_INTERACTIONS;REACTOME\_NCA  
RIPTION\_AND\_TRANSLATION;REACTOME\_PRE\_NOTCH\_EXPRESSION\_AND\_PROCESSING;R  
ALLING\_PATHWAY\_VIA\_PKC\_AND\_MAPK;REACTOME\_SIGNALING\_BY\_GPCR;REACTOME\_PE  
RIPTION\_INITIATION\_FROM\_TYPE\_2\_PROMOTER;REACTOME\_RNA\_POL\_III\_TRANSCRIPTION  
RIPTION\_INITIATION\_FROM\_TYPE\_2\_PROMOTER;REACTOME\_RNA\_POL\_III\_TRANSCRIPTION  
ME\_CELL\_CYCLE\_MITOTIC;REACTOME\_MITOTIC\_M\_M\_G1\_PHASES;REACTOME\_DNA\_REPLI

BOLISM;REACTOME\_GLYCEROPHOSPHOLIPID\_BIOSYNTHESIS;REACTOME\_METABOLISM\_O

CELL\_CYCLE;REACTOME\_CHROMOSOME\_MAINTENANCE;REACTOME\_MEIOTIC\_SYNAPSIS

KYLATION\_HYPUSINE\_FORMATION\_AND\_ARYLSULFATASE\_ACTIVATION;REACTOME\_GLYCC

'NTHESIS;REACTOME\_METABOLISM\_OF\_LIPIDS\_AND\_LIPOPROTEINS;REACTOME\_FATTY\_AI  
'NTHESIS;REACTOME\_METABOLISM\_OF\_LIPIDS\_AND\_LIPOPROTEINS;REACTOME\_FATTY\_AI  
;ONTRACTION;REACTOME\_MUSCLE\_CONTRACTION

ORS\_OF\_RIG\_I\_MDA5\_SIGNALING;REACTOME\_RIG\_I\_MDA5\_MEDIATED\_INDUCTION\_OF\_IFN\_

REACTOME\_NRAGE\_SIGNALS\_DEATH\_THROUGH\_JNK;REACTOME\_REGULATION\_OF\_APOP

CELL\_CYCLE;REACTOME\_PROCESSING\_OF\_CAPPED\_INTRON\_CONTAINING\_PRE\_MRNA;RE  
ACTOME\_ADAPTIVE\_IMMUNE\_SYSTEM;REACTOME\_CLASS\_I\_MHC\_MEDIATED\_ANTIGEN\_PRES

GTPASES;REACTOME\_SIGNALLING\_BY\_NGF;REACTOME\_NRAGE\_SIGNALS\_DEATH\_THROUGH

GTPASES

MOLOGY;REACTOME\_PPARA\_ACTIVATES\_GENE\_EXPRESSION;REACTOME\_GENERIC\_TRANSCR  
IPTION;REACTOME\_GAP\_JUNCTION\_TRAFFICKING;REACTOME\_GAP\_JUNCTION\_ASSEMBLY

ILAR\_DOMAIN\_REGULATES\_TRANSCRIPTION;REACTOME\_SIGNALING\_BY\_NOTCH1;REACTO  
M\_GLYCOGENOLYSIS;REACTOME\_METABOLISM\_OF\_CARBOHYDRATES;REACTOME\_GLU

'NTHESIS;REACTOME\_FATTY\_ACYL\_COA\_BIOSYNTHESIS;REACTOME\_METABOLISM\_OF\_LIP

ON;REACTOME\_CHONDROITIN\_SULFATE\_DERMATAN\_SULFATE\_METABOLISM;REACTOME\_I  
RANSPORT\_OF\_SMALL\_MOLECULES;REACTOME\_SLC\_MEDIATED\_TRANSMEMBRANE\_TRAN:

RANSPORT\_OF\_SMALL\_MOLECULES;REACTOME\_ION\_TRANSPORT\_BY\_P\_TYPE\_ATPASES;R

N;REACTOME\_CHONDROITIN\_SULFATE\_BIOSYNTHESIS;REACTOME\_CHONDROITIN\_SULFAT  
RANSPORT\_OF\_SMALL\_MOLECULES;REACTOME\_PLATELET\_HOMEOSTASIS;REACTOME\_PL  
OME\_SRP\_DEPENDENT\_COTRANSLATIONAL\_PROTEIN\_TARGETING\_TO\_MEMBRANE;REACT  
OLOGY;REACTOME\_CELL\_SURFACE\_INTERACTIONS\_AT\_THE\_VASCULAR\_WALL;REACTOME  
OLOGY;REACTOME\_CELL\_SURFACE\_INTERACTIONS\_AT\_THE\_VASCULAR\_WALL;REACTOME

RBOHYDRATES

ME\_CHROMOSOME\_MAINTENANCE;REACTOME\_TELOMERE\_MAINTENANCE;REACTOME\_EX

NO\_ACIDS\_AND\_DERIVATIVES

SM\_BY\_IFN\_STIMULATED\_GENES;REACTOME\_INTERFERON\_SIGNALING;REACTOME\_IMMUN



ON;REACTOME\_HEPARAN\_SULFATE\_HEPARIN\_HS\_GAG\_METABOLISM;REACTOME\_GLYCOS  
ME\_CELL\_CYCLE\_MITOTIC;REACTOME\_RECRUITMENT\_OF\_MITOTIC\_CENTROSOME\_PROTEI

.TRANSMITS\_SIGNAL\_TO\_THE\_NUCLEUS;REACTOME\_SIGNALING\_BY\_NOTCH4;REACTOME\_

ME\_MHC\_CLASS\_II\_ANTIGEN\_PRESENTATION;REACTOME\_CELL\_CYCLE\_MITOTIC;REACTO

:ONTRACTION;REACTOME\_MUSCLE\_CONTRACTION

TRIX\_ORGANIZATION;REACTOME\_COLLAGEN\_FORMATION

LOGY;REACTOME\_AXON\_GUIDANCE;REACTOME\_NCAM\_SIGNALING\_FOR\_NEURITE\_OUT\_C  
;REACTOME\_PEPTIDE\_LIGAND\_BINDING\_RECEPTORS;REACTOME\_CLASS\_A1\_RHODOPSIN\_

;REACTOME\_CLASS\_B\_2\_SECRETIN\_FAMILY\_RECEPTORS;REACTOME\_GPCR\_LIGAND\_BIN  
\_METABOLISM;REACTOME\_METABOLISM\_OF\_AMINO\_ACIDS\_AND\_DERIVATIVES;REACTOME

S\_IN\_LIPID\_HOMEOSTASIS;REACTOME\_ABC\_FAMILY\_PROTEINS\_MEDIATED\_TRANSPORT;R

TRANSPORT\_OF\_SMALL\_MOLECULES;REACTOME\_SLC\_MEDIATED\_TRANSMEMBRANE\_TRANSPORT;  
PROTEIN\_IMPORT;REACTOME\_METABOLISM\_OF\_PROTEINS

REACTOME\_CELL\_CYCLE\_MITOTIC;REACTOME\_RECRUITMENT\_OF\_MITOTIC\_CENTROSOME\_PROTEIN;  
REACTOME\_CELL\_CYCLE\_MITOTIC;REACTOME\_RECRUITMENT\_OF\_MITOTIC\_CENTROSOME\_PROTEIN

REACTOME\_CELL\_CYCLE\_MITOTIC;REACTOME\_RECRUITMENT\_OF\_MITOTIC\_CENTROSOME\_PROTEIN;  
REACTOME\_SIGNALING\_BY\_SCF\_KIT;REACTOME\_CELL\_CELL\_COMMUNICATION;REACTOME\_CELL\_CELL\_COMMUNICATION

REACTOME\_CELL\_CELL\_COMMUNICATION;REACTOME\_CELL\_CELL\_COMMUNICATION;REACTOME\_CELL\_CELL\_COMMUNICATION;  
REACTOME\_CYTOCHROME\_P450\_ARRANGED\_BY\_SUBSTRATE\_TYPE;REACTOME\_PHA  
REACTOME\_PHA\_ARRANGED\_BY\_SUBSTRATE\_TYPE;REACTOME\_PHA\_ARRANGED\_BY\_SUBSTRATE\_TYPE;  
REACTOME\_PHA\_ARRANGED\_BY\_SUBSTRATE\_TYPE;REACTOME\_PHOSPHOLIPID\_METABOLISM;REACTOME\_PHA

REACTOME\_PHA\_ARRANGED\_BY\_SUBSTRATE\_TYPE;REACTOME\_PHOSPHOLIPID\_METABOLISM;REACTOME\_PHA  
REACTOME\_PHA\_ARRANGED\_BY\_SUBSTRATE\_TYPE;REACTOME\_PHOSPHOLIPID\_METABOLISM;REACTOME\_PHA  
REACTOME\_PHA\_ARRANGED\_BY\_SUBSTRATE\_TYPE;REACTOME\_PHOSPHOLIPID\_METABOLISM;REACTOME\_PHA  
REACTOME\_PHA\_ARRANGED\_BY\_SUBSTRATE\_TYPE;REACTOME\_PHOSPHOLIPID\_METABOLISM;REACTOME\_PHA

REACTOME\_PHA\_ARRANGED\_BY\_SUBSTRATE\_TYPE;REACTOME\_PHOSPHOLIPID\_METABOLISM;REACTOME\_PHA  
REACTOME\_PHA\_ARRANGED\_BY\_SUBSTRATE\_TYPE;REACTOME\_PHOSPHOLIPID\_METABOLISM;REACTOME\_PHA  
REACTOME\_PHA\_ARRANGED\_BY\_SUBSTRATE\_TYPE;REACTOME\_PHOSPHOLIPID\_METABOLISM;REACTOME\_PHA  
REACTOME\_PHA\_ARRANGED\_BY\_SUBSTRATE\_TYPE;REACTOME\_PHOSPHOLIPID\_METABOLISM;REACTOME\_PHA

REACTOME\_PHA\_ARRANGED\_BY\_SUBSTRATE\_TYPE;REACTOME\_PHOSPHOLIPID\_METABOLISM;REACTOME\_PHA  
REACTOME\_PHA\_ARRANGED\_BY\_SUBSTRATE\_TYPE;REACTOME\_PHOSPHOLIPID\_METABOLISM;REACTOME\_PHA  
REACTOME\_PHA\_ARRANGED\_BY\_SUBSTRATE\_TYPE;REACTOME\_PHOSPHOLIPID\_METABOLISM;REACTOME\_PHA  
REACTOME\_PHA\_ARRANGED\_BY\_SUBSTRATE\_TYPE;REACTOME\_PHOSPHOLIPID\_METABOLISM;REACTOME\_PHA

REACTOME\_PHA\_ARRANGED\_BY\_SUBSTRATE\_TYPE;REACTOME\_PHOSPHOLIPID\_METABOLISM;REACTOME\_PHA  
REACTOME\_PHA\_ARRANGED\_BY\_SUBSTRATE\_TYPE;REACTOME\_PHOSPHOLIPID\_METABOLISM;REACTOME\_PHA  
REACTOME\_PHA\_ARRANGED\_BY\_SUBSTRATE\_TYPE;REACTOME\_PHOSPHOLIPID\_METABOLISM;REACTOME\_PHA  
REACTOME\_PHA\_ARRANGED\_BY\_SUBSTRATE\_TYPE;REACTOME\_PHOSPHOLIPID\_METABOLISM;REACTOME\_PHA

ME\_METABOLISM\_OF\_CARBOHYDRATES;REACTOME\_GLUCOSE\_METABOLISM

OF\_HOMO\_SAPIENS\_WITH\_MYCOBACTERIUM\_TUBERCULOSIS;REACTOME\_NITRIC\_OXIDE\_S

REACTOME\_SIGNALING\_BY\_SCF\_KIT;REACTOME\_DEVELOPMENTAL\_BIOLOGY;REACTOME\_

TO\_3\_EXORIBONUCLEASE;REACTOME\_METABOLISM\_OF\_MRNA;REACTOME\_DEADENYLATIC  
PPED\_INTRON\_CONTAINING\_PRE\_MRNA;REACTOME\_MRNA\_PROCESSING;REACTOME\_MRN  
TION\_PATHWAY

BOLISM;REACTOME\_GLYCEROPHOSPHOLIPID\_BIOSYNTHESIS;REACTOME\_METABOLISM\_O

KYLATION\_HYPUSINE\_FORMATION\_AND\_ARYLSULFATASE\_ACTIVATION;REACTOME\_GLYCC

LOGY;REACTOME\_MHC\_CLASS\_II\_ANTIGEN\_PRESENTATION;REACTOME\_AXON\_GUIDANCE

YSS\_CHEMICAL\_SYNAPSES;REACTOME\_NEURONAL\_SYSTEM;REACTOME\_NEUROTRANSMIT  
REACTOME\_TRIF\_MEDIATED\_TLR3\_SIGNALING;REACTOME\_P75NTR\_RECRUITS\_SIGNALLIN

TRIX\_ORGANIZATION;REACTOME\_COLLAGEN\_FORMATION  
ON\_OF\_SOLUBLE\_EXOGENOUS\_ANTIGENS\_ENDOSOMES;REACTOME\_ANTIGEN\_PROCESSIN

LOGY;REACTOME\_CELL\_CELL\_COMMUNICATION;REACTOME\_AXON\_GUIDANCE;REACTOMI

3;REACTOME\_REGULATION\_OF\_INSULIN\_LIKE\_GROWTH\_FACTOR\_IGF\_ACTIVITY\_BY\_INSUL

;REACTOME\_CLASS\_A1\_RHODOPSIN\_LIKE\_RECEPTORS;REACTOME\_AMINE\_LIGAND\_BINDII

.IPTION;REACTOME\_TRANSCRIPTION;REACTOME\_RNA\_POL\_I\_RNA\_POL\_III\_AND\_MITOCHONDRIAL\_METABOLISM;  
REACTOME\_PPARA\_ACTIVATES\_GENE\_EXPRESSION;REACTOME\_METABOLISM\_OF\_CITRIC\_ACID\_CYCLE;  
REACTOME\_ABC\_FAMILY\_PROTEINS\_MEDIATED\_TRANSPORT;REACTOME\_CELL\_CYCLE\_MITOTIC;  
REACTOME\_RECRUITMENT\_OF\_MITOTIC\_CENTROSOME\_PROTEINS;REACTOME\_DEVELOPMENTAL\_BIOLOGY;  
REACTOME\_CELL\_CYCLE\_MITOTIC\_FOR\_APOPTOSIS;REACTOME\_TRAF6\_MEDIATED\_IRF7\_ACTIVATION;  
REACTOME\_TRAF6\_MEDIATED\_INTERACTIONS

REACTOME\_ON\_OF\_FGFR\_SIGNALING;REACTOME\_INSULIN\_RECEPTOR\_SIGNALLING\_CASCADE;REACTOME\_GTPASES;  
REACTOME\_SIGNALING\_BY\_NGF;REACTOME\_DEVELOPMENTAL\_BIOLOGY;REACTOME\_INTERFERON\_ALPHA\_BETA\_SIGNALING;  
REACTOME\_INTERFERON\_GAMMA\_SIGNALING;REACTOME\_ORC1\_REMOVAL\_FROM\_CHROMATIN;  
REACTOME\_CELL\_CYCLE\_MITOTIC;REACTOME\_CELL\_CYCLE\_MITOTIC\_FOR\_APOPTOSIS

REACTOME\_INSULIN\_SYNTHESIS\_AND\_PROCESSING

REACTOME\_TRANSPORT\_OF\_SMALL\_MOLECULES;REACTOME\_SLC\_MEDIATED\_TRANSMEMBRANE\_TRANSPORT

REACTOME\_GSS\_CHEMICAL\_SYNAPSES;REACTOME\_NEURONAL\_SYSTEM;REACTOME\_INTEGRATION\_OF\_CELLULAR\_SIGNALING;  
REACTOME\_OLFACTORY\_SIGNALING\_PATHWAY;REACTOME\_GPCR\_DOWNSTREAM\_SIGNALING

REACTOME\_POTASSIUM\_CHANNELS

REACTOME\_CELL\_CYCLE\_MITOTIC;REACTOME\_RECRUITMENT\_OF\_MITOTIC\_CENTROSOME\_PROTEINS;  
REACTOME\_TRANSPORT\_OF\_SMALL\_MOLECULES;REACTOME\_SLC\_MEDIATED\_TRANSMEMBRANE\_TRANSPORT

REACTOME\_TRIF\_MEDIATED\_TLR3\_SIGNALING;REACTOME\_P75NTR\_RECRUITS\_SIGNALLIN

RIPTION;REACTOME\_TRANSCRIPTION;REACTOME\_RNA\_POL\_I\_RNA\_POL\_III\_AND\_MITOCHC

GTPASES;REACTOME\_SIGNALLING\_BY\_NGF;REACTOME\_DEVELOPMENTAL\_BIOLOGY;REAC  
OME\_METABOLISM\_OF\_PROTEINS

ICATION;REACTOME\_ADHERENS\_JUNCTIONS\_INTERACTIONS;REACTOME\_CELL\_CELL\_JUN

)  
)

REACTOME\_NGF\_SIGNALLING\_VIA\_TRKA\_FROM\_THE\_PLASMA\_MEMBRANE;REACTOME\_SIC

TRANSPORT\_OF\_SMALL\_MOLECULES;REACTOME\_SLC\_MEDIATED\_TRANSMEMBRANE\_TRAN

OME\_FORMATION\_OF\_THE\_TERNARY\_COMPLEX\_AND\_SUBSEQUENTLY\_THE\_43S\_COMPLE  
TRANSPORT\_OF\_SMALL\_MOLECULES;REACTOME\_ION\_TRANSPORT\_BY\_P\_TYPE\_ATPASES;R  
POLISM;REACTOME\_GLYCOSAMINOGLYCAN\_METABOLISM;REACTOME\_ABC\_FAMILY\_PROTE  
TRANSPORT\_OF\_SMALL\_MOLECULES;REACTOME\_ION\_CHANNEL\_TRANSPORT;REACTOME\_L

TOR\_INTERACTIONS;REACTOME\_RESPONSE\_TO\_ELEVATED\_PLATELET\_CYTOSOLIC\_CA2\_

NTHESIS;REACTOME\_FATTY\_ACYL\_COA\_BIOSYNTHESIS;REACTOME\_METABOLISM\_OF\_LIP

MOLOGY;REACTOME\_REGULATION\_OF\_APOPTOSIS;REACTOME\_AXON\_GUIDANCE;REACTOMI

IG\_CROSS\_PRESENTATION;REACTOME\_ENDOSOMAL\_VACUOLAR\_PATHWAY;REACTOME\_E

TRIX\_ORGANIZATION;REACTOME\_COLLAGEN\_FORMATION

BOLISM;REACTOME\_SYNTHESIS\_OF\_PIPS\_AT\_THE\_PLASMA\_MEMBRANE;REACTOME\_PI\_M

PROTEINS; REACTOME\_POST\_TRANSLATIONAL\_PROTEIN\_MODIFICATION; REACTOME\_ASPARAGINASE4; REACTOME\_NUCLEAR\_SIGNALING\_BY\_ERBB4; REACTOME\_SIGNALING\_BY\_GPCR; REACTOME

REACTOME\_TANDEM\_PORE\_DOMAIN\_POTASSIUM\_CHANNELS; REACTOME\_POTASSIUM\_CHANNELS

REACTOME\_INTEGRATION\_OF\_ENERGY\_METABOLISM; REACTOME\_REGULATION\_OF\_INSULIN;  
REACTOME\_TRANSMITS\_SIGNAL\_TO\_THE\_NUCLEUS; REACTOME\_SIGNALING\_BY\_NOTCH1; REACTOME

NO\_ACIDS\_AND\_DERIVATIVES

BOLISM; REACTOME\_SYNTHESIS\_OF\_PIP2\_AT\_THE\_PLASMA\_MEMBRANE; REACTOME\_PI3K

DIOL\_BIOSYNTHESIS; REACTOME\_PHOSPHOLIPID\_METABOLISM; REACTOME\_SPHINGOLIPID

REACTOME\_CTNNB1\_PHOSPHORYLATION\_CASCADE; REACTOME\_CELL\_CYCLE; REACTOME

ACTIVATED\_PLATELET\_CYTOSOLIC\_CA2\_SIGNALING; REACTOME\_GLYCOLYSIS; REACTOME\_GLUONEOGENESIS



MPED\_INTRON\_CONTAINING\_PRE\_MRNA;REACTOME\_MRNA\_PROCESSING;REACTOME\_MRNA\_PROCESSING;  
3;REACTOME\_UNFOLDED\_PROTEIN\_RESPONSE

MISS\_CHEMICAL\_SYNAPSES;REACTOME\_NEURONAL\_SYSTEM;REACTOME\_NEUROTRANSMITTER

ONS;REACTOME\_CYTOSOLIC\_SULFONATION\_OF\_SMALL\_MOLECULES;REACTOME\_PHASE\_III

MISS\_CHEMICAL\_SYNAPSES;REACTOME\_NEURONAL\_SYSTEM;REACTOME\_NEUROTRANSMITTER

MISS\_CHEMICAL\_SYNAPSES;REACTOME\_NEURONAL\_SYSTEM;REACTOME\_SIGNALING\_BY\_G

BETA\_SIGNALING;REACTOME\_INTERFERON\_SIGNALING;REACTOME\_IMMUNE\_SYSTEM;REACTOME

RESPIRATORY\_ELECTRON\_TRANSPORT;REACTOME\_RESPIRATORY\_ELECTRON\_TRANSPORT;

PROTEOLYTIC\_ACTIVITY\_OF\_APC\_C\_REQUIRED\_FOR\_THE\_ONSET\_OF\_ANAPHASE\_BY\_MITOSIS

;REACTOME\_OPIOID\_SIGNALLING;REACTOME\_DARPP\_32\_EVENTS

;TRANSPORT\_OF\_SMALL\_MOLECULES;REACTOME\_SLC\_MEDIATED\_TRANSMEMBRANE\_TRAN

SPORT;REACTOME\_GROWTH\_HORMONE\_RECEPTOR\_SIGNALING;REACTOME\_SIGNALING\_BY\_E

PHOSPHATASES;REACTOME\_HEPARAN\_SULFATE\_HEPARIN\_HS\_GAG\_METABOLISM;REACTOME\_GLYCOS

REACTOME\_TRIF\_MEDIATED\_TLR3\_SIGNALING;REACTOME\_TCR\_SIGNALING;REACTOME\_D

ISCRIBINATION;REACTOME\_DSCAM\_INTERACTIONS

PHOSPHOLIPID\_SYNTHESIS;REACTOME\_PHOSPHOLIPID\_METABOLISM;REACTOME\_SYNTHESIS\_OF\_PA;REACT

OME\_GPCR\_DOWNSTREAM\_SIGNALING;REACTOME\_CLASS\_A1\_RHODOPSIN\_LIKE\_RECEPTORS;REACTOME\_GPCR\_DOWNSTREAM

SIGNALING;REACTOME\_CHONDROITIN\_SULFATE\_DERMATAN\_SULFATE\_METABOLISM;REACTOME\_I

ICATION;REACTOME\_CELL\_EXTRACELLULAR\_MATRIX\_INTERACTIONS;REACTOME\_CELL\_JL

GTPASES;REACTOME\_MEMBRANE\_TRAFFICKING;REACTOME\_TRANS\_GOLGI\_NETWORK\_VI

ATED\_PLATELET\_CYTOSOLIC\_CA2\_;REACTOME\_FORMATION\_OF\_FIBRIN\_CLOT\_CLOTTING\_

\_METABOLISM;REACTOME\_PHOSPHOLIPID\_METABOLISM;REACTOME\_SPHINGOLIPID\_META  
REACTOME\_CELL\_CELL\_COMMUNICATION;REACTOME\_P75NTR\_RECRUITS\_SIGNALLING\_C

DS\_AND\_LIPOPROTEINS;REACTOME\_LIPID\_DIGESTION\_MOBILIZATION\_AND\_TRANSPORT;F

ORT\_ACROSS\_THE\_PLASMA\_MEMBRANE;REACTOME\_TRANSMEMBRANE\_TRANSPORT\_OF\_

ATION\_OF\_MUCINS;REACTOME\_TERMINATION\_OF\_O\_GLYCAN\_BIOSYNTHESIS;REACTOME\_

CELL\_CYCLE;REACTOME\_CHROMOSOME\_MAINTENANCE;REACTOME\_MEIOTIC\_SYNOPSIS  
RIPTION\_AND\_TRANSLATION;REACTOME\_SIGNALING\_BY\_NOTCH2;REACTOME\_PRE\_NOTC

MPLEMENT\_CASCADE;REACTOME\_INNATE\_IMMUNE\_SYSTEM;REACTOME\_IMMUNE\_SYSTEM

FACE\_INTERACTIONS;REACTOME\_SIGNALING\_BY\_PDGF

RIN\_BH4\_SYNTHESIS\_RECYCLING\_SALVAGE\_AND\_REGULATION;REACTOME\_METABOLISM\_

YSS\_CHEMICAL\_SYNAPSES;REACTOME\_NEURONAL\_SYSTEM;REACTOME\_NEUROTRANSMIT

BOLISM;REACTOME\_SYNTHESIS\_OF\_PC;REACTOME\_GLYCEROPHOSPHOLIPID\_BIOSYNTH  
ENE\_EXPRESSION;REACTOME\_METABOLISM\_OF\_LIPIDS\_AND\_LIPOPROTEINS;REACTOME\_  
FACE\_INTERACTIONS

RIPTION\_INITIATION\_FROM\_TYPE\_2\_PROMOTER;REACTOME\_RNA\_POL\_II\_TRANSCRIPTION

\_B\_CELL\_RECEPTOR\_LEADING\_TO\_GENERATION\_OF\_SECOND\_MESSENGERS;REACTOME\_

SPIRATORY\_ELECTRON\_TRANSPORT;REACTOME\_MITOCHONDRIAL\_PROTEIN\_IMPORT;REA  
ALLING\_PATHWAY\_VIA\_PKC\_AND\_MAPK;REACTOME\_SIGNALING\_BY\_GPCR;REACTOME\_IN

SS\_CHEMICAL\_SYNAPSES;REACTOME\_NEURONAL\_SYSTEM

TEINS;REACTOME\_POST\_TRANSLATIONAL\_PROTEIN\_MODIFICATION;REACTOME\_SYNTHE

;REACTOME\_PEPTIDE\_LIGAND\_BINDING\_RECEPTORS;REACTOME\_CLASS\_A1\_RHODOPSIN\_

RADATION;REACTOME\_SIGNALLING\_BY\_NGF;REACTOME\_DEVELOPMENTAL\_BIOLOGY;REAC

FACTOME\_POST\_CHAPERONIN\_TUBULIN\_FOLDING\_PATHWAY;REACTOME\_METABOLISM\_O

SS\_CHEMICAL\_SYNAPSES;REACTOME\_NEURONAL\_SYSTEM;REACTOME\_NEUROTRANSMIT

ICATION;REACTOME\_SIGNAL\_REGULATORY\_PROTEIN\_SIRP\_FAMILY\_INTERACTIONS

ILAR\_DOMAIN\_REGULATES\_TRANSCRIPTION;REACTOME\_SIGNALING\_BY\_NOTCH1;REACTO

TRANSPORT\_OF\_SMALL\_MOLECULES;REACTOME\_SLC\_MEDIATED\_TRANSMEMBRANE\_TRAN

LOGY;REACTOME\_HS\_GAG\_DEGRADATION;REACTOME\_CHONDROITIN\_SULFATE\_DERMAT

GTPASES

IPLED\_NER\_TC\_NER;REACTOME\_NUCLEOTIDE\_EXCISION\_REPAIR;REACTOME\_FORMATION

TRANSPORT\_OF\_SMALL\_MOLECULES;REACTOME\_SLC\_MEDIATED\_TRANSMEMBRANE\_TRAN

LOGY;REACTOME\_AXON\_GUIDANCE;REACTOME\_NETRIN1\_SIGNALING;REACTOME\_DCC\_M

IG\_CROSS\_PRESENTATION;REACTOME\_ENDOSOMAL\_VACUOLAR\_PATHWAY;REACTOME\_E

RT\_AND\_METABOLISM;REACTOME\_ABC\_FAMILY\_PROTEINS\_MEDIATED\_TRANSPORT;REACT

ALLING\_PATHWAY\_VIA\_PKC\_AND\_MAPK;REACTOME\_SIGNALING\_BY\_GPCR;REACTOME\_G

ALLING\_PATHWAY\_VIA\_PKC\_AND\_MAPK;REACTOME\_SIGNALING\_BY\_GPCR;REACTOME\_G

;REACTOME\_OLFACTORY\_SIGNALING\_PATHWAY;REACTOME\_GPCR\_DOWNSTREAM\_SIGNA

SS\_CHEMICAL\_SYNAPSES;REACTOME\_NEURONAL\_SYSTEM

TION\_PATHWAY

\_AT\_THE\_EARLY\_ENDOSOME\_MEMBRANE;REACTOME\_SYNTHESIS\_OF\_PIP3\_AT\_THE\_GOLGI  
ICATION;REACTOME\_CELL\_EXTRACELLULAR\_MATRIX\_INTERACTIONS;REACTOME\_CELL\_CYCLE;  
CELL\_CYCLE;REACTOME\_P53\_INDEPENDENT\_G1\_S\_DNA\_DAMAGE\_CHECKPOINT;REACTOME  
3;REACTOME\_ACTIVATION\_OF\_CHAPERONE\_GENES\_BY\_XBP1S;REACTOME\_UNFOLDED\_P

REACTOME\_SIGNALING\_BY\_SCF\_KIT;REACTOME\_DEVELOPMENTAL\_BIOLOGY;REACTOME\_  
EN\_PRESENTATION;REACTOME\_FACTORS\_INVOLVED\_IN\_MEGAKARYOCYTE\_DEVELOPME  
REACTOME\_INTEGRATION\_OF\_ENERGY\_METABOLISM;REACTOME\_REGULATION\_OF\_INSUL

ISS\_CHEMICAL\_SYNAPSES;REACTOME\_NEURONAL\_SYSTEM;REACTOME\_NEUROTRANSMIT

\_B\_CELL\_RECEPTOR\_LEADING\_TO\_GENERATION\_OF\_SECOND\_MESSENGERS;REACTOME\_

\_IN\_MEGAKARYOCYTE\_DEVELOPMENT\_AND\_PLATELET\_PRODUCTION;REACTOME\_HEMOST

'TION\_PATHWAY

ISS\_CHEMICAL\_SYNAPSES;REACTOME\_NEURONAL\_SYSTEM;REACTOME\_NEUROTRANSMIT

3BOHYDRATES



RBOHYDRATES

;REACTOME\_CLASS\_C\_3\_METABOTROPIC\_Glutamate\_Pheromone\_Receptors;REACTOME\_IMMUNE\_SYSTEM;REACTOME\_ADAPTIVE\_IMMUNE\_SYSTEM

ION\_OF\_CARBOXYLATE

IG\_CROSS\_PRESENTATION;REACTOME\_LATENT\_INFECTION\_OF\_HOMO\_SAPIENS\_WITH\_M;REACTOME\_VOLTAGE\_GATED\_POTASSIUM\_CHANNELS;REACTOME\_POTASSIUM\_CHANNEL

ATION\_OF\_MUCINS;REACTOME\_METABOLISM\_OF\_PROTEINS;REACTOME\_POST\_TRANSLA

TEIN\_IMPORT;REACTOME\_METABOLISM\_OF\_PROTEINS

KYLATION\_HYPUSINE\_FORMATION\_AND\_ARYLSULFATASE\_ACTIVATION;REACTOME\_GLYC;ACTIVATES\_CIRCADIAN\_EXPRESSION;REACTOME\_CIRCADIAN\_CLOCK

ME\_CELL\_CYCLE\_MITOTIC;REACTOME\_MITOTIC\_M\_M\_G1\_PHASES;REACTOME\_DNA\_REPLI

ATION\_OF\_MUCINS;REACTOME\_METABOLISM\_OF\_PROTEINS;REACTOME\_POST\_TRANSLA

LOGY;REACTOME\_AXON\_GUIDANCE;REACTOME\_NETRIN1\_SIGNALING;REACTOME\_DCC\_M

NON\_CODING\_RNA;REACTOME\_ANTIVIRAL\_MECHANISM\_BY\_IFN\_STIMULATED\_GENES;REACTO

RECYCLING;REACTOME\_LATENT\_INFECTION\_OF\_HOMO\_SAPIENS\_WITH\_MYCOBACTERIUM

TEM;REACTOME\_IMMUNE\_SYSTEM;REACTOME\_NOD1\_2\_SIGNALING\_PATHWAY;REACTOME

ICATION;REACTOME\_TGF\_BETA\_RECEPTOR\_SIGNALING\_IN\_EMT\_EPITHELIAL\_TO\_MESENC

MOLOGY;REACTOME\_AXON\_GUIDANCE;REACTOME\_NETRIN1\_SIGNALING;REACTOME\_DCC\_M

NO\_ACIDS\_AND\_DERIVATIVES;REACTOME\_AMINE\_DERIVED\_HORMONES

MOLOGY;REACTOME\_EXTRACELLULAR\_MATRIX\_ORGANIZATION;REACTOME\_COLLAGEN\_FOF

MOLOGY;REACTOME\_PPARA\_ACTIVATES\_GENE\_EXPRESSION;REACTOME\_METABOLISM\_OF\_  
MOLOGY;REACTOME\_REGULATION\_OF\_BETA\_CELL\_DEVELOPMENT;REACTOME\_REGULATION  
\_IN\_MEGAKARYOCYTE\_DEVELOPMENT\_AND\_PLATELET\_PRODUCTION;REACTOME\_HEMOSTA  
NON\_CODING\_RNA;REACTOME\_METABOLISM\_OF\_RNA

SE\_OF\_CELLULAR\_PROTEINS;REACTOME\_MEMBRANE\_TRAFFICKING;REACTOME\_SIGNALIN  
SS\_CHEMICAL\_SYNAPSES;REACTOME\_NEURONAL\_SYSTEM;REACTOME\_NEUROTRANSMIT

FACE\_INTERACTIONS

ICATION;REACTOME\_INTEGRIN\_CELL\_SURFACE\_INTERACTIONS;REACTOME\_CELL\_JUNCTI  
SIGNALLING\_CASCADE;REACTOME\_REGULATION\_OF\_AMPK\_ACTIVITY\_VIA\_LKB1;REACTOM  
TRIX\_ORGANIZATION;REACTOME\_COLLAGEN\_FORMATION;REACTOME\_METABOLISM\_OF\_L

.ATION\_OF\_MUCINS;REACTOME\_METABOLISM\_OF\_PROTEINS;REACTOME\_POST\_TRANSLA  
ATION\_OF\_MUCINS;REACTOME\_METABOLISM\_OF\_PROTEINS;REACTOME\_POST\_TRANSLA

'TION\_PATHWAY

'TION\_PATHWAY

'NTHESIS;REACTOME\_PHOSPHOLIPID\_METABOLISM;REACTOME\_SYNTHESIS\_OF\_PE;REAC

GTPASES;REACTOME\_SIGNALLING\_BY\_NGF;REACTOME\_NRAGE\_SIGNALS\_DEATH\_THROU

)F\_TGF\_BETA\_RECEPTOR\_SIGNALING;REACTOME\_TGF\_BETA\_RECEPTOR\_SIGNALING\_ACT

)WN\_GLYCOGENOLYSIS;REACTOME\_METABOLISM\_OF\_CARBOHYDRATES;REACTOME\_GLU

ICATION;REACTOME\_CELL\_JUNCTION\_ORGANIZATION

ME\_CELL\_CYCLE\_MITOTIC;REACTOME\_RECRUITMENT\_OF\_MITOTIC\_CENTROSOME\_PROTEI

TEM;REACTOME\_IMMUNE\_SYSTEM;REACTOME\_INFLAMMASOMES;REACTOME\_NUCLEOTID

ACTOME\_TRANSLOCATION\_OF\_ZAP\_70\_TO\_IMMUNOLOGICAL\_SYNAPSE;REACTOME\_GENER

EN\_PRESENTATION;REACTOME\_FACTORS\_INVOLVED\_IN\_MEGAKARYOCYTE\_DEVELOPME  
;REACTOME\_CLASS\_B\_2\_SECRETIN\_FAMILY\_RECEPTORS;REACTOME\_GPCR\_DOWNSTREA

OME\_SRP\_DEPENDENT\_COTRANSLATIONAL\_PROTEIN\_TARGETING\_TO\_MEMBRANE;REACT

REACTOME\_SIGNALING\_BY\_SCF\_KIT;REACTOME\_CELL\_CELL\_COMMUNICATION;REACTOM

TRANSPORT\_OF\_SMALL\_MOLECULES;REACTOME\_ION\_TRANSPORT\_BY\_P\_TYPE\_ATPASES;R  
TRANSPORT\_OF\_SMALL\_MOLECULES;REACTOME\_ION\_TRANSPORT\_BY\_P\_TYPE\_ATPASES;R

ON\_OF\_FGFR\_SIGNALING;REACTOME\_INSULIN\_RECEPTOR\_SIGNALLING\_CASCADE;REACTO

;REACTOME\_PEPTIDE\_LIGAND\_BINDING\_RECEPTORS;REACTOME\_CLASS\_A1\_RHODOPSIN  
GTPASES;REACTOME\_SIGNALLING\_BY\_NGF;REACTOME\_PPARA\_ACTIVATES\_GENE\_EXPRES

ATION\_OF\_MUCINS;REACTOME\_TERMINATION\_OF\_O\_GLYCAN\_BIOSYNTHESIS;REACTOME

ON;REACTOME\_SMOOTH\_MUSCLE\_CONTRACTION  
HE\_EXTRACELLULAR\_MATRIX;REACTOME\_EXTRACELLULAR\_MATRIX\_ORGANIZATION

ONS;REACTOME\_GLUTATHIONE\_CONJUGATION;REACTOME\_PHASE\_II\_CONJUGATION  
TOME\_HIV\_LIFE\_CYCLE;REACTOME\_EARLY\_PHASE\_OF\_HIV\_LIFE\_CYCLE;REACTOME\_HOST

LOGY;REACTOME\_CELL\_CELL\_COMMUNICATION;REACTOME\_IMMUNOREGULATORY\_INTEI

ATION\_OF\_MUCINS;REACTOME\_TERMINATION\_OF\_O\_GLYCAN\_BIOSYNTHESIS;REACTOME.

REACTOME\_INTEGRATION\_OF\_ENERGY\_METABOLISM;REACTOME\_ABC\_FAMILY\_PROTEINS  
ISM\_AND\_CITRIC\_ACID\_TCA\_CYCLE;REACTOME\_TCA\_CYCLE\_AND\_RESPIRATORY\_ELECTR

EN\_PRESENTATION;REACTOME\_IMMUNE\_SYSTEM;REACTOME\_ADAPTIVE\_IMMUNE\_SYSTE

TRANSPORT\_OF\_SMALL\_MOLECULES;REACTOME\_SLC\_MEDIATED\_TRANSMEMBRANE\_TRAN:

HE\_EXTRACELLULAR\_MATRIX;REACTOME\_EXTRACELLULAR\_MATRIX\_ORGANIZATION  
:ONTRACTION;REACTOME\_MUSCLE\_CONTRACTION

ACTOME\_ADAPTIVE\_IMMUNE\_SYSTEM;REACTOME\_CLASS\_I\_MHC\_MEDIATED\_ANTIGEN\_PR

PROTEOLYTIC\_ACTIVITY\_OF\_APC\_C\_REQUIRED\_FOR\_THE\_ONSET\_OF\_ANAPHASE\_BY\_MIT

REACTIONS\_AT\_THE\_VASCULAR\_WALL;REACTOME\_BASIGIN\_INTERACTIONS;REACTOME\_HE  
REACTIONS\_AT\_THE\_VASCULAR\_WALL;REACTOME\_INTEGRIN\_CELL\_SURFACE\_INTERACTIO  
TRANSPORT\_OF\_SMALL\_MOLECULES;REACTOME\_SLC\_MEDIATED\_TRANSMEMBRANE\_TRAN:

;REACTOME\_CLASS\_B\_2\_SECRETIN\_FAMILY\_RECEPTORS;REACTOME\_GLUCAGON\_TYPE\_L

;REACTOME\_NUCLEAR\_SIGNALING\_BY\_ERBB4  
S\_IN\_LIPID\_HOMEOSTASIS;REACTOME\_ABC\_FAMILY\_PROTEINS\_MEDIATED\_TRANSPORT;R  
REACTOME\_POST\_CHAPERONIN\_TUBULIN\_FOLDING\_PATHWAY;REACTOME\_METABOLISM\_O  
TRANSPORT\_OF\_SMALL\_MOLECULES;REACTOME\_SLC\_MEDIATED\_TRANSMEMBRANE\_TRAN:

S\_IN\_LIPID\_HOMEOSTASIS;REACTOME\_ABC\_FAMILY\_PROTEINS\_MEDIATED\_TRANSPORT;R

;REACTOME\_CLASS\_B\_2\_SECRETIN\_FAMILY\_RECEPTORS;REACTOME\_GPCR\_LIGAND\_BIN

TION\_PATHWAY

ALLING\_PATHWAY\_VIA\_PKC\_AND\_MAPK;REACTOME\_SIGNALING\_BY\_GPCR;REACTOME\_PE  
OLOGY;REACTOME\_AXON\_GUIDANCE;REACTOME\_NCAM1\_INTERACTIONS;REACTOME\_NCA  
ALLING\_PATHWAY\_VIA\_PKC\_AND\_MAPK;REACTOME\_TRANSMISSION\_ACROSS\_CHEMICAL\_  
IN\_MEGAKARYOCYTE\_DEVELOPMENT\_AND\_PLATELET\_PRODUCTION;REACTOME\_HEMOST

OLOGY;REACTOME\_EXTRACELLULAR\_MATRIX\_ORGANIZATION;REACTOME\_COLLAGEN\_FOF

REACTOME\_TRIF\_MEDIATED\_TLR3\_SIGNALING;REACTOME\_P75NTR\_RECRUITS\_SIGNALLIN

ING;REACTOME\_GAP\_JUNCTION\_TRAFFICKING;REACTOME\_GAP\_JUNCTION\_ASSEMBLY  
ATION\_OF\_MUCINS;REACTOME\_TERMINATION\_OF\_O\_GLYCAN\_BIOSYNTHESIS;REACTOME

;TOME\_ANTIVIRAL\_MECHANISM\_BY\_IFN\_STIMULATED\_GENES;REACTOME\_SIGNALING\_BY\_  
CLEOTIDES;REACTOME\_PURINE\_SALVAGE;REACTOME\_PURINE\_METABOLISM

GTPASES;REACTOME\_SIGNALLING\_BY\_NGF;REACTOME\_NRAGE\_SIGNALS\_DEATH\_THROUGH  
NO\_ACIDS\_AND\_DERIVATIVES;REACTOME\_AMINE\_DERIVED\_HORMONES  
:ROID\_HORMONES\_AND\_VITAMINS\_A\_AND\_D;REACTOME\_STEROID\_HORMONES;REACTOM

TRIX\_ORGANIZATION;REACTOME\_COLLAGEN\_FORMATION  
;OLISM;REACTOME\_GLYCOSAMINOGLYCAN\_METABOLISM;REACTOME\_ABC\_FAMILY\_PROTEI  
)TOME\_NITRIC\_OXIDE\_STIMULATES\_GUANYLATE\_CYCLASE;REACTOME\_PLATELET\_HOMEO  
<ING;REACTOME\_TRANS\_GOLGI\_NETWORK\_VESICLE\_BUDDING;REACTOME\_GOLGI\_ASSOC

;REACTOME\_PEPTIDE\_LIGAND\_BINDING\_RECEPTORS;REACTOME\_CLASS\_A1\_RHODOPSIN

)LOGY;REACTOME\_AXON\_GUIDANCE;REACTOME\_OTHER\_SEMAPHORIN\_INTERACTIONS;RE  
GTPASES;REACTOME\_SIGNALLING\_BY\_NGF;REACTOME\_TRANSMISSION\_ACROSS\_CHEMIC  
;E\_OF\_CELLULAR\_PROTEINS;REACTOME\_SIGNALING\_BY\_WNT;REACTOME\_CTNNB1\_PHOS

)LOGY;REACTOME\_TRANSCRIPTIONAL\_REGULATION\_OF\_WHITE\_ADIPOCYTE\_DIFFERENTI/  
)

\_PRE\_REPLICATIVE\_COMPLEX;REACTOME\_CELL\_CYCLE;REACTOME\_PROCESSIVE\_SYNTHI

)LOGY;REACTOME\_AXON\_GUIDANCE;REACTOME\_CRMP5\_IN\_SEMA3A\_SIGNALING;REACTO

RIPTION;REACTOME\_TRANSCRIPTION;REACTOME\_RNA\_POL\_I\_RNA\_POL\_III\_AND\_MITOCHC

;REACTOME\_OLFACTORY\_SIGNALING\_PATHWAY;REACTOME\_GPCR\_DOWNSTREAM\_SIGNA

ENE\_EXPRESSION;REACTOME\_METABOLISM\_OF\_LIPIDS\_AND\_LIPOPROTEINS;REACTOME\_

ATION\_OF\_MUCINS;REACTOME\_METABOLISM\_OF\_PROTEINS;REACTOME\_POST\_TRANSLA

REACTOME\_DAG\_AND\_IP3\_SIGNALING;REACTOME\_SIGNALING\_BY\_ERBB2;REACTOME\_SIG

ERGY\_METABOLISM;REACTOME\_REGULATION\_OF\_INSULIN\_SECRETION;REACTOME\_INCRI

VA;REACTOME\_METABOLISM\_OF\_RNA;REACTOME\_DESTABILIZATION\_OF\_MRNA\_BY\_BRF1;

YLOGY;REACTOME\_AXON\_GUIDANCE;REACTOME\_NCAM1\_INTERACTIONS;REACTOME\_NCA

TRIX\_ORGANIZATION;REACTOME\_COLLAGEN\_FORMATION

POXIA\_INDUCIBLE\_FACTOR\_HIF\_BY\_OXYGEN;REACTOME\_OXYGEN\_DEPENDENT\_PROLINE

OME\_FORMATION\_OF\_THE\_TERNARY\_COMPLEX\_AND\_SUBSEQUENTLY\_THE\_43S\_COMPLE

ATED\_PLATELET\_CYTOSOLIC\_CA2\_;REACTOME\_FORMATION\_OF\_FIBRIN\_CLOT\_CLOTTING\_



NING;REACTOME\_TRANSCRIPTION;REACTOME\_RNA\_POL\_II\_PRE\_TRANSCRIPTION\_EVENTS;  
A\_SPLICING

SE1\_FUNCTIONALIZATION\_OF\_COMPOUNDS  
EROPHOSPHOLIPID\_BIOSYNTHESIS;REACTOME\_METABOLISM\_OF\_LIPIDS\_AND\_LIPOPROTI

UNE\_SYSTEM;REACTOME\_ADAPTIVE\_IMMUNE\_SYSTEM  
NDRIAL\_TRANSCRIPTION;REACTOME\_RNA\_POL\_III\_TRANSCRIPTION\_INITIATION\_FROM\_TY

3\_IN\_IMMUNE\_SYSTEM

GINE\_N\_LINKED\_GLYCOSYLATION;REACTOME\_TRANSPORT\_TO\_THE\_GOLGI\_AND\_SUBSEC

LM\_SIGNALING;REACTOME\_G\_ALPHA\_S\_SIGNALLING\_EVENTS;REACTOME\_GPCR\_LIGAND\_I

PRESSION;REACTOME\_PRE\_NOTCH\_EXPRESSION\_AND\_PROCESSING;REACTOME\_NOTCH

OME\_PROCESSING\_OF\_CAPPED\_INTRON\_CONTAINING\_PRE\_MRNA;REACTOME\_TRANSPOR

NALING\_BY\_EGFR\_IN\_CANCER;REACTOME\_NGF\_SIGNALLING\_VIA\_TRKA\_FROM\_THE\_PLAS  
ACTOME\_SPRY\_REGULATION\_OF\_FGF\_SIGNALING;REACTOME\_TRIF\_MEDIATED\_TLR3\_SIG

SPORT;REACTOME\_TRANSPORT\_OF\_GLUCOSE\_AND\_OTHER\_SUGARS\_BILE\_SALTS\_AND\_C

X;REACTOME\_ACTIVATION\_OF\_THE\_MRNA\_UPON\_BINDING\_OF\_THE\_CAP\_BINDING\_COMP

REACTOME\_PACKAGING\_OF\_TELOMERE\_ENDS;REACTOME\_TELOMERE\_MAINTENANCE

\_CYCLE;REACTOME\_LATE\_PHASE\_OF\_HIV\_LIFE\_CYCLE

FORMATION;REACTOME\_CELL\_JUNCTION\_ORGANIZATION

DOWNSTREAM\_TCR\_SIGNALING;REACTOME\_P75NTR\_RECRUITS\_SIGNALLING\_COMPLEXES;

ALING

TRANSPORT\_ACROSS\_THE\_PLASMA\_MEMBRANE;REACTOME\_TRANSMEMBRANE\_TRANSPORT

SM;REACTOME\_GLYCOSAMINOGLYCAN\_METABOLISM;REACTOME\_METABOLISM\_OF\_CARB

EACTOME\_ION\_CHANNEL\_TRANSPORT

ITS

RNA\_SPLICING;REACTOME\_MRNA\_SPLICING\_MINOR\_PATHWAY

SPINDLE\_POLES\_AND\_COMPLEXES;REACTOME\_LOSS\_OF\_NLP\_FROM\_MITOTIC\_CENTROSOMES;REACTOME

EGFR\_SIGNALING\_BY\_EGFR\_IN\_CANCER;REACTOME\_NGF\_SIGNALING\_VIA\_TRKA\_FROM\_THE\_PLASMA

PHASE1\_METABOLISM;REACTOME\_PHASE1\_FUNCTIONALIZATION\_OF\_COMPOUNDS

ROTEIN\_RESPONSE

REACTOME\_TRANSCRIPTION\_OF\_MRNA;REACTOME\_RNA\_POL\_II\_TRANSCRIPTION;REACTOME\_MRNA\_PROCESSING;REACT

REACTOME\_AMINOGLYCAN\_METABOLISM;REACTOME\_METABOLISM\_OF\_CARBOHYDRATES

REACTOME\_JNK\_SIGNALING;REACTOME\_CELL\_DEATH\_SIGNALLING\_VIA\_NFkB\_NFkB1A\_NFkB2\_NFkB3\_NFkB4\_NFkB5\_NFkB6\_NFkB7\_NFkB8\_NFkB9\_NFkB10\_NFkB11\_NFkB12\_NFkB13\_NFkB14\_NFkB15\_NFkB16\_NFkB17\_NFkB18\_NFkB19\_NFkB20\_NFkB21\_NFkB22\_NFkB23\_NFkB24\_NFkB25\_NFkB26\_NFkB27\_NFkB28\_NFkB29\_NFkB30\_NFkB31\_NFkB32\_NFkB33\_NFkB34\_NFkB35\_NFkB36\_NFkB37\_NFkB38\_NFkB39\_NFkB40\_NFkB41\_NFkB42\_NFkB43\_NFkB44\_NFkB45\_NFkB46\_NFkB47\_NFkB48\_NFkB49\_NFkB50\_NFkB51\_NFkB52\_NFkB53\_NFkB54\_NFkB55\_NFkB56\_NFkB57\_NFkB58\_NFkB59\_NFkB60\_NFkB61\_NFkB62\_NFkB63\_NFkB64\_NFkB65\_NFkB66\_NFkB67\_NFkB68\_NFkB69\_NFkB70\_NFkB71\_NFkB72\_NFkB73\_NFkB74\_NFkB75\_NFkB76\_NFkB77\_NFkB78\_NFkB79\_NFkB80\_NFkB81\_NFkB82\_NFkB83\_NFkB84\_NFkB85\_NFkB86\_NFkB87\_NFkB88\_NFkB89\_NFkB90\_NFkB91\_NFkB92\_NFkB93\_NFkB94\_NFkB95\_NFkB96\_NFkB97\_NFkB98\_NFkB99\_NFkB100

REACTOME\_SIGNALING\_BY\_ERBB2;REACTOME\_SIGNALING\_BY\_EGFR\_IN\_CANCER;REACTOME\_PI3K\_EVENT

REACTOME\_SIGNALING\_BY\_ERBB2;REACTOME\_SIGNALING\_BY\_EGFR\_IN\_CANCER;REACTOME\_PI3K\_EVENT

REACTOME\_CHROMATIN\_REMODELING;REACTOME\_ASSOCIATION\_OF\_LICENSING\_FACTORS\_WITH\_THE\_PRE\_REP

S

ITS

IE\_PPARA\_ACTIVATES\_GENE\_EXPRESSION;REACTOME\_RORA\_ACTIVATES\_CIRCADIAN\_EX

JUNCTION\_ORGANIZATION

ACTOME\_PURINE\_METABOLISM

FORMATION;REACTOME\_INTEGRIN\_CELL\_SURFACE\_INTERACTIONS;REACTOME\_SIGNALING\_B  
3H\_JNK;REACTOME\_CELL\_DEATH\_SIGNALLING\_VIA\_NRAGE\_NRIF\_AND\_NADE;REACTOME\_

E\_SIGNALING\_BY\_ERBB4;REACTOME\_SIGNALING\_BY\_ERBB2;REACTOME\_SIGNALING\_BY\_C  
RASIS

OXIDATION



ΓASIS;REACTOME\_HIV\_INFECTION;REACTOME\_HOST\_INTERACTIONS\_OF\_HIV\_FACTORS;RE  
EACTOME\_NOTCH1\_INTRACELLULAR\_DOMAIN\_REGULATES\_TRANSCRIPTION;REACTOME\_

ANNELS

;REACTOME\_METABOLISM\_OF\_CARBOHYDRATES

SPORT;REACTOME\_TRANSPORT\_OF\_INORGANIC\_CATIONS\_ANIONS\_AND\_AMINO\_ACIDS\_O

Ξ\_ENDOSOMAL\_SORTING\_COMPLEX\_REQUIRED\_FOR\_TRANSPORT\_ESCRT;REACTOME\_HI

SPORT;REACTOME\_TRANSPORT\_OF\_INORGANIC\_CATIONS\_ANIONS\_AND\_AMINO\_ACIDS\_O

\_ASMA\_MEMBRANE;REACTOME\_SIGNALLING\_TO\_ERKS;REACTOME\_P38MAPK\_EVENTS

RT;REACTOME\_STEROID\_HORMONES;REACTOME\_METABOLISM\_OF\_LIPIDS\_AND\_LIPOPRC

CTOME\_REGULATION\_OF\_WATER\_BALANCE\_BY\_RENAL\_AQUAPORINS

\_METABOLISM\_OF\_PROTEINS;REACTOME\_POST\_TRANSLATIONAL\_PROTEIN\_MODIFICATIO  
\_METABOLISM\_OF\_PROTEINS;REACTOME\_POST\_TRANSLATIONAL\_PROTEIN\_MODIFICATIO

AMINOGLYCAN\_METABOLISM;REACTOME\_METABOLISM\_OF\_CARBOHYDRATES

;REACTOME\_HEMOSTASIS;REACTOME\_PLATELET\_ACTIVATION\_SIGNALING\_AND\_AGGREG  
ROTEIN\_RESPONSE

NT\_AND\_PLATELET\_PRODUCTION;REACTOME\_KINESINS;REACTOME\_HEMOSTASIS;REACTC

LING

STIMULATES\_GUANYLATE\_CYCLASE;REACTOME\_PLATELET\_HOMEOSTASIS;REACTOME\_HE  
CTOME\_SIGNALING\_BY\_NOTCH1;REACTOME\_TRANSCRIPTIONAL\_ACTIVITY\_OF\_SMAD2\_SM  
SIS\_INDUCED\_DNA\_FRAGMENTATION;REACTOME\_TAK1\_ACTIVATES\_NFKB\_BY\_PHOSPHOR

CESSING\_PRESENTATION;REACTOME\_ANTIGEN\_PROCESSING\_UBIQUITINATION\_PROTEA

LING

SPORT;REACTOME\_TRANSPORT\_OF\_INORGANIC\_CATIONS\_ANIONS\_AND\_AMINO\_ACIDS\_O

JALING

SPORT;REACTOME\_TRANSPORT\_OF\_VITAMINS\_NUCLEOSIDES\_AND\_RELATED\_MOLECULE

ACTOME\_CYTOKINE\_SIGNALING\_IN\_IMMUNE\_SYSTEM  
|\_INTERACTIONS;REACTOME\_CELL\_JUNCTION\_ORGANIZATION

F\_PROTEINS

ES;REACTOME\_NEURONAL\_SYSTEM;REACTOME\_NEUROTRANSMITTER\_RELEASE\_CYCLE;F

\_LIKE\_RECEPTORS;REACTOME\_GPCR\_DOWNSTREAM\_SIGNALING;REACTOME\_G\_ALPHA\_I

OXIDATION  
OXIDATION

SCRIPTION\_PATHWAY;REACTOME\_METABOLISM\_OF\_LIPIDS\_AND\_LIPOPROTEINS;REACTOME

ESICLE\_BUDDING;REACTOME\_SYNTHESIS\_OF\_PIPS\_AT\_THE\_GOLGI\_MEMBRANE;REACTOM

PROCESSING\_PRESENTATION;REACTOME\_ANTIGEN\_PROCESSING\_UBIQUITINATION\_PROTEA

ALING

ACTOME\_PURINE\_METABOLISM

S;REACTOME\_HEMOSTASIS

S;REACTOME\_HEMOSTASIS

OME\_GLYCEROPHOSPHOLIPID\_BIOSYNTHESIS;REACTOME\_SIGNALING\_BY\_GPCR;REACTOM

E\_SIGNALING\_BY\_ERBB4;REACTOME\_SIGNALING\_BY\_ERBB2;REACTOME\_SIGNALING\_BY\_C

E\_SIGNALING\_BY\_ERBB4;REACTOME\_SIGNALING\_BY\_ERBB2;REACTOME\_SIGNALING\_BY\_C

PTIDE\_LIGAND\_BINDING\_RECEPTORS;REACTOME\_CLASS\_A1\_RHODOPSIN\_LIKE\_RECEPTC

R\_PHAGOSOME\_PATHWAY;REACTOME\_IMMUNOREGULATORY\_INTERACTIONS\_BETWEEN\_  
NDRIAL\_TRANSCRIPTION;REACTOME\_RNA\_POL\_I\_TRANSCRIPTION\_INITIATION

.FATTY\_ACID\_TRIACYLGLYCEROL\_AND\_KETONE\_BODY\_METABOLISM

V\_OF\_GENE\_EXPRESSION\_IN\_BETA\_CELLS;REACTOME\_TRANSMEMBRANE\_TRANSPORT\_O

iPCR;REACTOME\_INTEGRATION\_OF\_ENERGY\_METABOLISM;REACTOME\_OPIOID\_SIGNALLIN  
ON\_TRANSPORT;REACTOME\_REGULATION\_OF\_PYRUVATE\_DEHYDROGENASE\_PDH\_COMP

SIS

SPORT;REACTOME\_TRANSPORT\_OF\_INORGANIC\_CATIONS\_ANIONS\_AND\_AMINO\_ACIDS\_O  
\_INTERACTIONS;REACTOME\_INTERACTION\_BETWEEN\_L1\_AND\_ANKYRINS;REACTOME\_VOI

SPORT;REACTOME\_TRANSPORT\_OF\_VITAMINS\_NUCLEOSIDES\_AND\_RELATED\_MOLECULE

L\_SYSTEM;REACTOME\_INTEGRATION\_OF\_ENERGY\_METABOLISM;REACTOME\_AXON\_GUID

OTH\_MUSCLE\_CONTRACTION;REACTOME\_HEMOSTASIS;REACTOME\_PLATELET\_ACTIVATIC

CTOME\_REGULATION\_OF\_WATER\_BALANCE\_BY\_RENAL\_AQUAPORINS

\_SIGNALING\_BY\_ERBB4;REACTOME\_SIGNALING\_BY\_ERBB2;REACTOME\_SIGNALING\_BY\_CO  
IGNALING\_BY\_EGFR\_IN\_CANCER;REACTOME\_ANTIGEN\_ACTIVATES\_B\_CELL\_RECEPTOR\_LE/  
ROTEIN\_RESPONSE

DIATED\_VESICLE\_BIOGENESIS



TER\_RECEPTOR\_BINDING\_AND\_DOWNSTREAM\_TRANSMISSION\_IN\_THE\_POSTSYNAPTIC\_

ON\_TRANSPORT;REACTOME\_REGULATION\_OF\_PYRUVATE\_DEHYDROGENASE\_PDH\_COMP

TEGRATION\_OF\_ENERGY\_METABOLISM;REACTOME\_GLUCAGON\_SIGNALING\_IN\_METABOLI  
ME\_TRIGLYCERIDE\_BIOSYNTHESIS;REACTOME\_FATTY\_ACYL\_COA\_BIOSYNTHESIS;REACTO

3\_BY\_ATF4;REACTOME\_UNFOLDED\_PROTEIN\_RESPONSE;REACTOME\_METABOLISM\_OF\_MI  
I\_OF\_TRANSCRIPTION\_COUPLED\_NER\_TC\_NER\_REPAIR\_COMPLEX;REACTOME\_DNA\_REPA

3GROWTH;REACTOME\_L1CAM\_INTERACTIONS;REACTOME\_INTERACTION\_BETWEEN\_L1\_AND  
3\_BY\_ATF4;REACTOME\_UNFOLDED\_PROTEIN\_RESPONSE;REACTOME\_METABOLISM\_OF\_MI

)\_METABOLISM;REACTOME\_ACYL\_CHAIN\_REMODELLING\_OF\_PE;REACTOME\_GLYCEROPHO  
IDE\_HORMONE\_BIOSYNTHESIS

IGNALING\_BY\_EGFR\_IN\_CANCER;REACTOME\_NGF\_SIGNALLING\_VIA\_TRKA\_FROM\_THE\_PLAS

OM\_CHROMATIN;REACTOME\_CELL\_CYCLE\_MITOTIC;REACTOME\_CELL\_CYCLE\_CHECKPOINT

EM;REACTOME\_ADAPTIVE\_IMMUNE\_SYSTEM

TIONAL\_PROTEIN\_MODIFICATION

3H\_JNK;REACTOME\_CELL\_DEATH\_SIGNALLING\_VIA\_NF\_KB;REACTOME\_

PROCESSING\_PRESENTATION;REACTOME\_ANTIGEN\_PROCESSING\_UBIQUITINATION\_PROTEA

LI\_INTERACTIONS;REACTOME\_CELL\_JUNCTION\_ORGANIZATION

:CULES

MG\_CROSS\_PRESENTATION;REACTOME\_INTERFERON\_GAMMA\_SIGNALING;REACTOME\_INT

3H\_JNK;REACTOME\_CELL\_DEATH\_SIGNALLING\_VIA\_NRAGE\_NRIF\_AND\_NADE;REACTOME\_

3H\_JNK;REACTOME\_CELL\_DEATH\_SIGNALLING\_VIA\_NRAGE\_NRIF\_AND\_NADE;REACTOME\_  
ON;REACTOME\_RNA\_POL\_I\_RNA\_POL\_III\_AND\_MITOCHONDRIAL\_TRANSCRIPTION;REACTO

\_SMALL\_MOLECULES;REACTOME\_SLC\_MEDIATED\_TRANSMEMBRANE\_TRANSPORT;REACTO  
\_SMALL\_MOLECULES;REACTOME\_SLC\_MEDIATED\_TRANSMEMBRANE\_TRANSPORT;REACTO

SPORT;REACTOME\_TRANSPORT\_OF\_INORGANIC\_CATIONS\_ANIONS\_AND\_AMINO\_ACIDS\_O  
ON;REACTOME\_RNA\_POL\_I\_RNA\_POL\_III\_AND\_MITOCHONDRIAL\_TRANSCRIPTION;REACTO

REACTOME\_TRANSCRIPTION;REACTOME\_RNA\_POL\_I\_RNA\_POL\_III\_AND\_MITOCHONDRIAL

ME\_SIGNALING\_BY\_NOTCH

REACTOME\_INNATE\_IMMUNE\_SYSTEM;REACTOME\_IMMUNE\_SYSTEM;REACTOME\_TC

ING

PLACEMENT\_PATHWAY;REACTOME\_BASE\_FREE\_SUGAR\_PHOSPHATE\_REMOVAL\_VIA\_THE  
PLACEMENT\_PATHWAY;REACTOME\_BASE\_FREE\_SUGAR\_PHOSPHATE\_REMOVAL\_VIA\_THE

REACTOME\_ION\_CHANNEL\_TRANSPORT

FANCONI\_ANEMIA\_PATHWAY;REACTOME\_FANCONI\_ANEMIA\_PATHWAY;REACTOME\_DNA\_F  
REACTOME\_NUCLEOTIDE\_LIKE\_PURINERGIC\_RECEPTORS;REACTOME\_GPCR\_DOWNSTREAM

OF\_GENE\_EXPRESSION\_IN\_BETA\_CELLS;REACTOME\_INTEGRATION\_OF\_ENERGY\_METAB

RECEPTION\_COUPLED\_NER\_TC\_NER;REACTOME\_POL\_SWITCHING;REACTOME\_NUCLEOTIDE\_E

SPORT;REACTOME\_TRANSPORT\_OF\_INORGANIC\_CATIONS\_ANIONS\_AND\_AMINO\_ACIDS\_O  
IE\_PPARG\_ACTIVATES\_GENE\_EXPRESSION;REACTOME\_RORA\_ACTIVATES\_CIRCADIAN\_EX

ASIS

PTOR\_SIGNALING;REACTOME\_NUCLEAR\_SIGNALING\_BY\_ERBB4;REACTOME\_IMMUNE\_SYS

TRANSCRIPTION;REACTOME\_MRNA\_CAPPING;REACTOME\_TRANSCRIPTION\_COUPLED\_NER

N;REACTOME\_HYALURONAN\_UPTAKE\_AND\_DEGRADATION;REACTOME\_HYALURONAN\_ME  
N;REACTOME\_HYALURONAN\_UPTAKE\_AND\_DEGRADATION;REACTOME\_HYALURONAN\_ME  
HA\_HYDROXYCHOLESTEROL;REACTOME\_SYNTHESIS\_OF\_BILE\_ACIDS\_AND\_BILE\_SALTS;RE

LIGAND\_GATED\_ION\_CHANNEL\_TRANSPORT

ATION

REACTOME\_RNA\_POL\_I\_RNA\_POL\_III\_AND\_MITOCHONDRIAL\_TRANSCRIPTION;REACTOME\_CHRC

REACTOME\_REGULATION\_OF\_WHITE\_ADIPOCYTE\_DIFFERENTIATION;REACTOME\_APOPTOSIS

REACTOME\_CYTOCHROME\_P450\_ARRANGED\_BY\_SUBSTRATE\_TYPE;REACTOME\_PHASE1\_FUNC

TIONAL\_PROTEIN\_MODIFICATION

\_SIGNALING\_BY\_THE\_B\_CELL\_RECEPTOR\_BCR;REACTOME\_IMMUNE\_SYSTEM;REACTOME\_

BY\_ERBB2;REACTOME\_GRB2\_EVENTS\_IN\_ERBB2\_SIGNALING;REACTOME\_PI3K\_EVENTS\_IN

PTORS\_BY\_RECRUITING\_THEM\_TO\_CLATHRIN\_ADAPTERS;REACTOME\_LATENT\_INFECTION  
REACTOME\_PACKAGING\_OF\_TELOMERE\_ENDS;REACTOME\_TELOMERE\_MAINTENANCE  
ME\_SIGNALING\_BY\_NOTCH

ND\_PLATELET\_PRODUCTION;REACTOME\_TRAF3\_DEPENDENT\_IRF\_ACTIVATION\_PATHWAY

ME\_SIGNALING\_BY\_NOTCH

VENTS;REACTOME\_NGF\_SIGNALLING\_VIA\_TRKA\_FROM\_THE\_PLASMA\_MEMBRANE;REACTC

CED\_BY\_THE\_EXON\_JUNCTION\_COMPLEX

E\_ROLE\_OF\_DCC\_IN\_REGULATING\_APOPTOSIS;REACTOME\_NETRIN1\_SIGNALING;REACTOI  
E\_ROLE\_OF\_DCC\_IN\_REGULATING\_APOPTOSIS;REACTOME\_NETRIN1\_SIGNALING;REACTOI

NT\_AND\_PLATELET\_PRODUCTION;REACTOME\_KINESINS;REACTOME\_HEMOSTASIS;REACTC

\_METABOLISM\_OF\_PROTEINS;REACTOME\_POST\_TRANSLATIONAL\_PROTEIN\_MODIFICATIO

.;REACTOME\_HEMOSTASIS;REACTOME\_PLATELET\_ACTIVATION\_SIGNALING\_AND\_AGGREG



M\_SIGNALING\_FOR\_NEURITE\_OUT\_GROWTH;REACTOME\_L1CAM\_INTERACTIONS;REACTOME

GLUCOSE\_METABOLISM

GLUCOSE\_METABOLISM

GLUCOSYLATED\_VESICLE\_BIOGENESIS

PROTEIN\_RESPONSE

REACTOME\_CYTOCHROME\_P450\_ARRANGED\_BY\_SUBSTRATE\_TYPE;REACTOME\_PHASE1\_FUNC

REACTOME\_CYTOCHROME\_P450\_ARRANGED\_BY\_SUBSTRATE\_TYPE;REACTOME\_PHASE1\_FUNC

REACTOME\_LIPIDS\_AND\_LIPOPROTEINS;REACTOME\_FATTY\_ACID\_TRIACYLGLYCEROL\_AND\_KETONE\_B

ODY\_METABOLISM;REACTOME\_SYNTHESIS\_OF\_PALM;REACTOME\_ACYL\_CHAIN\_REMODELLING\_C

TRANSITION

TRANSITION\_AND\_REGULATION

TRANSITION\_;REACTOME\_G1\_S\_TRANSITION;REACTOME\_MITOTIC\_G1\_G1\_S\_PHASES;REAC

TRANSITION\_;REACTOME\_G1\_S\_TRANSITION;REACTOME\_MITOTIC\_G1\_G1\_S\_PHASES;REAC

REGULATION\_OF\_ENDOSOMAL\_TLR;REACTOME\_MHC\_CLASS\_II\_ANTIGEN\_PRESENTATION;REACTOME

PROCESSING\_PRESENTATION;REACTOME\_ANTIGEN\_PROCESSING\_UBIQUITINATION\_PROTEA

GROWTH;REACTOME\_L1CAM\_INTERACTIONS;REACTOME\_INTERACTION\_BETWEEN\_L1\_AND

EX;REACTOME\_ACTIVATION\_OF\_THE\_MRNA\_UPON\_BINDING\_OF\_THE\_CAP\_BINDING\_COMP

\_TRIF\_MEDIATED\_TLR3\_SIGNALING;REACTOME\_SIGNALING\_BY\_ERBB4;REACTOME\_SIGNAL

INTER\_RECEPTOR\_BINDING\_AND\_DOWNSTREAM\_TRANSMISSION\_IN\_THE\_POSTSYNAPTIC\_I

REACTOME\_NGF\_SIGNALLING\_VIA\_TRKA\_FROM\_THE\_PLASMA\_MEMBRANE;REACTOME\_NUC

CEDED\_BY\_THE\_EXON\_JUNCTION\_COMPLEX

INSULIN\_RECEPTOR;REACTOME\_MTORC1\_MEDIATED\_SIGNALLING;REACTOME\_PI3K\_CASCADE;  
REACTOME\_TRANSCRIPTION;REACTOME\_RNA\_POL\_I\_RNA\_POL\_III\_AND\_MITOCHONDRIAL

INS;REACTOME\_HEMOSTASIS

3;REACTOME\_METABOLISM\_OF\_PROTEINS

IM\_HOMEOSTASIS;REACTOME\_HEMOSTASIS

:\_CIRCADIAN\_EXPRESSION;REACTOME\_METABOLISM\_OF\_LIPIDS\_AND\_LIPOPROTEINS;REA

ENERGY\_METABOLISM;REACTOME\_METABOLISM\_OF\_LIPIDS\_AND\_LIPOPROTEINS;REACTOM

IE\_PPARA\_ACTIVATES\_GENE\_EXPRESSION;REACTOME\_RORA\_ACTIVATES\_CIRCADIAN\_EX

SPORT;REACTOME\_TRANSPORT\_OF\_INORGANIC\_CATIONS\_ANIONS\_AND\_AMINO\_ACIDS\_O

M\_SIGNALING\_FOR\_NEURITE\_OUT\_GROWTH

CRPTION;REACTOME\_HIV\_INFECTION;REACTOME\_HIV\_LIFE\_CYCLE;REACTOME\_LATE\_PHA

:EACTOME\_ION\_CHANNEL\_TRANSPORT

.LIPIDS\_AND\_LIPOPOTEINS;REACTOME\_FATTY\_ACID\_TRIACYLGLYCEROL\_AND\_KETONE\_E

\_METABOLISM\_OF\_PROTEINS;REACTOME\_POST\_TRANSLATIONAL\_PROTEIN\_MODIFICATIO  
\_METABOLISM\_OF\_PROTEINS;REACTOME\_POST\_TRANSLATIONAL\_PROTEIN\_MODIFICATIO  
\_METABOLISM\_OF\_PROTEINS;REACTOME\_POST\_TRANSLATIONAL\_PROTEIN\_MODIFICATIO  
\_METABOLISM\_OF\_PROTEINS;REACTOME\_POST\_TRANSLATIONAL\_PROTEIN\_MODIFICATIO

Y\_OF\_SMAD2\_SMAD3\_SMAD4\_HETEROTRIMER;REACTOME\_GENERIC\_TRANSCRIPTION\_PA

NSMEMBRANE\_TRANSPORT\_OF\_SMALL\_MOLECULES;REACTOME\_SLC\_MEDIATED\_TRANSM

CR;REACTOME\_G\_ALPHA1213\_SIGNALLING\_EVENTS;REACTOME\_GPCR\_DOWNSTREAM\_SIK  
FTER\_RECEPTOR\_BINDING\_AND\_DOWNSTREAM\_TRANSMISSION\_IN\_THE\_POSTSYNAPTIC\_  
FTER\_RECEPTOR\_BINDING\_AND\_DOWNSTREAM\_TRANSMISSION\_IN\_THE\_POSTSYNAPTIC\_

ED\_PROTEINS;REACTOME\_POST\_TRANSLATIONAL\_PROTEIN\_MODIFICATION;REACTOME\_H  
ED\_PROTEINS;REACTOME\_POST\_TRANSLATIONAL\_PROTEIN\_MODIFICATION;REACTOME\_H

.SYNAPSES;REACTOME\_NEURONAL\_SYSTEM;REACTOME\_SIGNALING\_BY\_GPCR;REACTOMI

.ING;REACTOME\_HIV\_INFECTION;REACTOME\_HOST\_INTERACTIONS\_OF\_HIV\_FACTORS;RE/  
IE\_PPARA\_ACTIVATES\_GENE\_EXPRESSION;REACTOME\_RORA\_ACTIVATES\_CIRCADIAN\_EX  
IE\_PPARA\_ACTIVATES\_GENE\_EXPRESSION;REACTOME\_RORA\_ACTIVATES\_CIRCADIAN\_EX

GNALING\_BY\_NOTCH

IE\_PPARA\_ACTIVATES\_GENE\_EXPRESSION;REACTOME\_PRE\_NOTCH\_TRANSCRIPTION\_ANI  
.FATTY\_ACID\_TRIACYLGLYCEROL\_AND\_KETONE\_BODY\_METABOLISM

.ND\_MAP\_KINASES\_UPON\_TLR7\_8\_OR\_9\_ACTIVATION;REACTOME\_TRAF6\_MEDIATED\_IRF7\_

AND\_MAP\_KINASES\_UPON\_TLR7\_8\_OR\_9\_ACTIVATION;REACTOME\_TRAF6\_MEDIATED\_IRF7\_  
\_SYSTEM;REACTOME\_PHASE1\_FUNCTIONALIZATION\_OF\_COMPOUNDS;REACTOME\_NEURO

REACTOME\_RESPIRATORY\_ELECTRON\_TRANSPORT\_ATP\_SYNTHESIS\_BY\_CHEMIOSMOTIC  
;RIPTION\_PATHWAY;REACTOME\_METABOLISM\_OF\_LIPIDS\_AND\_LIPOPROTEINS;REACTOME

ACTOME\_NRAGE\_SIGNALS\_DEATH\_THROUGH\_JNK;REACTOME\_CELL\_DEATH\_SIGNALLING\_

Q\_PHASE

ACTOME\_CYTOKINE\_SIGNALING\_IN\_IMMUNE\_SYSTEM

MOLECULES;REACTOME\_AXON\_GUIDANCE;REACTOME\_SIGNALING\_BY\_ROBO\_RECEPTOR

OTIC\_SPINDLE\_CHECKPOINT\_COMPONENTS;REACTOME\_CELL\_CYCLE;REACTOME\_CELL\_C

REACTOME\_METABOLISM\_OF\_CARBOHYDRATES;REACTOME\_GLUCOSE\_METABOLISM  
PROCESSING\_PRESENTATION;REACTOME\_ANTIGEN\_PROCESSING\_UBIQUITINATION\_PROTEA

PTIDE\_LIGAND\_BINDING\_RECEPTORS;REACTOME\_CLASS\_A1\_RHODOPSIN\_LIKE\_RECEPTC  
SPORT;REACTOME\_TRANSPORT\_OF\_GLUCOSE\_AND\_OTHER\_SUGARS\_BILE\_SALTS\_AND\_C  
SPORT;REACTOME\_TRANSPORT\_OF\_GLUCOSE\_AND\_OTHER\_SUGARS\_BILE\_SALTS\_AND\_C

LING\_BY\_ROBO\_RECEPTOR;REACTOME\_NETRIN1\_SIGNALING

\_SMALL\_MOLECULES;REACTOME\_SLC\_MEDIATED\_TRANSMEMBRANE\_TRANSPORT;REACTO

SIGNALING\_BY\_NOTCH

ALING\_BY\_ERBB2;REACTOME\_SIGNALING\_BY\_EGFR\_IN\_CANCER;REACTOME\_PI3K\_EVENTS

3Y\_ERBB2;REACTOME\_PI3K\_EVENTS\_IN\_ERBB2\_SIGNALING  
PLACEMENT\_PATHWAY;REACTOME\_BASE\_FREE\_SUGAR\_PHOSPHATE\_REMOVAL\_VIA\_THE



ALPHA\_Q\_SIGNALLING\_EVENTS;REACTOME\_GPCR\_DOWNSTREAM\_SIGNALING;REACTOME

4A\_HYDROXYCHOLESTEROL;REACTOME\_SYNTHESIS\_OF\_BILE\_ACIDS\_AND\_BILE\_SALTS\_VI

INS\_AND\_COMPLEXES;REACTOME\_LOSS\_OF\_NLP\_FROM\_MITOTIC\_CENTROSOMES;REAC

UNE\_SYSTEM;REACTOME\_ADAPTIVE\_IMMUNE\_SYSTEM

IE\_PPARA\_ACTIVATES\_GENE\_EXPRESSION;REACTOME\_RORA\_ACTIVATES\_CIRCADIAN\_EX

;TOME\_INTERFERON\_SIGNALING;REACTOME\_NEGATIVE\_REGULATORS\_OF\_RIG\_I\_MDA5\_S

OCCESSING\_PRESENTATION;REACTOME\_ANTIGEN\_PROCESSING\_UBIQUITINATION\_PROTEA

.SIGNALING\_BY\_NOTCH

DIATED\_ACTIVATION\_CASCADE;REACTOME\_HEMOSTASIS;REACTOME\_SIGNALING\_BY\_TGF

ASE

SPORT;REACTOME\_TRANSPORT\_OF\_GLUCOSE\_AND\_OTHER\_SUGARS\_BILE\_SALTS\_AND\_C

ALING\_BY\_ERBB2;REACTOME\_SIGNALING\_BY\_EGFR\_IN\_CANCER;REACTOME\_PI3K\_EVENTS

OME\_GPCR\_LIGAND\_BINDING  
PROCESSING\_PRESENTATION;REACTOME\_ANTIGEN\_PROCESSING\_UBIQUITINATION\_PROTEA  
PROCESSING\_PRESENTATION;REACTOME\_ANTIGEN\_PROCESSING\_UBIQUITINATION\_PROTEA

HS\_GAG\_BIOSYNTHESIS;REACTOME\_HEPARAN\_SULFATE\_HEPARIN\_HS\_GAG\_METABOLISM  
HS\_GAG\_BIOSYNTHESIS;REACTOME\_HEPARAN\_SULFATE\_HEPARIN\_HS\_GAG\_METABOLISM

Y\_METABOLISM

GINE\_N\_LINKED\_GLYCOSYLATION;REACTOME\_TRANSPORT\_TO\_THE\_GOLGI\_AND\_SUBSEC

ACTOME\_NGF\_SIGNALLING\_VIA\_TRKA\_FROM\_THE\_PLASMA\_MEMBRANE;REACTOME\_GAS

OGLYCAN\_METABOLISM;REACTOME\_TRANSMEMBRANE\_TRANSPORT\_OF\_SMALL\_MOLECU  
OGLYCAN\_METABOLISM;REACTOME\_TRANSMEMBRANE\_TRANSPORT\_OF\_SMALL\_MOLECU

ULATION\_OF\_CELL\_SURFACE\_RECEPTORS\_BY\_RECRUITING\_THEM\_TO\_CLATHRIN\_ADAPT

S  
S

VA\_SPLICING  
RIPTION\_PATHWAY;REACTOME\_METABOLISM\_OF\_LIPIDS\_AND\_LIPOPOTEINS;REACTOME

E\_SIGNALING\_BY\_FGFR\_IN\_DISEASE;REACTOME\_SIGNALING\_BY\_FGFR

LING\_CASCADE;REACTOME\_INTEGRATION\_OF\_ENERGY\_METABOLISM;REACTOME\_REGUL  
ILS;REACTOME\_IL\_3\_5\_AND\_GM-CSF\_SIGNALING;REACTOME\_IL\_RECEPTOR\_SHC\_SIGNALI

ED\_PROTEINS;REACTOME\_POST\_TRANSLATIONAL\_PROTEIN\_MODIFICATION

ASS\_A1\_RHODOPSIN\_LIKE\_RECEPTORS;REACTOME\_G\_ALPHA\_Q\_SIGNALLING\_EVENTS;RE

:CULES

:CULES

REACTOME\_SIGNALING\_BY\_NOTCH

REACTOME\_AXON\_GUIDANCE;REACTOME\_G\_ALPHA1213\_SIGNALLING\_EVENTS;REACTOME\_GPI

REACTOME\_EXPRESSION\_AND\_PROCESSING;REACTOME\_PRE\_NOTCH\_PROCESSING\_IN\_GOLGI;REA  
H\_EXPRESSION\_AND\_PROCESSING;REACTOME\_PRE\_NOTCH\_PROCESSING\_IN\_GOLGI;REA

REACTOME\_TRANSCRIPTION;REACTOME\_RNA\_POL\_I\_RNA\_POL\_III\_AND\_MITOCHONDRIAL

REACTOME\_METABOLISM;REACTOME\_METABOLISM\_OF\_LIPIDS\_AND\_LIPOPROTEINS

REACTOME\_PROCESSING\_PRESENTATION;REACTOME\_ANTIGEN\_PROCESSING\_UBIQUITINATION\_PROTEA

REACTOME\_CELL\_DEATH\_SIGNALING\_VI  
REACTOME\_MITOTIC\_PROMETAPHASE

REACTOME\_NRAGE\_SIGNALS\_DEATH\_THROUGH\_JNK;REACTOME\_CELL\_DEATH\_SIGNALING\_VI

REACTOME\_INITIAL\_TRIGGERING\_OF\_COMPLEMENT  
REACTOME\_ACTIVATION\_OF\_C4\_AND\_C2\_ACTIVATORS;REACTOME\_INITIAL\_TRIGGERING\_OF\_COMPLEMENT

ITS;REACTOME\_G\_ALPHA\_Z\_SIGNALLING\_EVENTS

MNDRIAL\_TRANSCRIPTION;REACTOME\_RNA\_POL\_III\_TRANSCRIPTION\_INITIATION\_FROM\_TY

CYTOSOLIC\_CA2\_;REACTOME\_HEMOSTASIS;REACTOME\_PLATELET\_ACTIVATION\_SIGNALIN

.IN\_LIKE\_GROWTH\_FACTOR\_BINDING\_PROTEINS\_IGFBPS

OME\_PROCESSING\_OF\_CAPPED\_INTRON\_CONTAINING\_PRE\_MRNA;REACTOME\_TRANSPOF

M\_SIGNALING\_FOR\_NEURITE\_OUT\_GROWTH

SIS;REACTOME\_METABOLISM\_OF\_LIPIDS\_AND\_LIPOPROTEINS

M\_SIGNALING\_FOR\_NEURITE\_OUT\_GROWTH;REACTOME\_L1CAM\_INTERACTIONS  
4;REACTOME\_COMPLEMENT\_CASCADE

ME\_OTHER\_SEMAPHORIN\_INTERACTIONS;REACTOME\_SEMA3A\_PAK\_DEPENDENT\_AXON\_F  
E\_METABOLISM\_OF\_LIPIDS\_AND\_LIPOPROTEINS

ET\_CYTOSOLIC\_CA2\_;REACTOME\_HEMOSTASIS;REACTOME\_PLATELET\_ACTIVATION\_SIGN.

3H\_JNK;REACTOME\_CELL\_DEATH\_SIGNALLING\_VIA\_NRAGE\_NRIF\_AND\_NADE;REACTOME\_

ANNELS

.SIGNALING\_BY\_ERBB4;REACTOME\_DOWNREGULATION\_OF\_ERBB2\_ERBB3\_SIGNALING;RE

DELLING\_OF\_PE;REACTOME\_GLYCEROPHOSPHOLIPID\_BIOSYNTHESIS;REACTOME\_METABO  
3B4;REACTOME\_SIGNALING\_BY\_EGFR\_IN\_CANCER;REACTOME\_NUCLEAR\_SIGNALING\_BY\_I

.IN\_SECRETION\_BY\_GLUCAGON\_LIKE\_PEPTIDE1;REACTOME\_REGULATION\_OF\_INSULIN\_SE

IE\_PPARA\_ACTIVATES\_GENE\_EXPRESSION;REACTOME\_RORA\_ACTIVATES\_CIRCADIAN\_EX

SPORT;REACTOME\_TRANSPORT\_OF\_INORGANIC\_CATIONS\_ANIONS\_AND\_AMINO\_ACIDS\_O

E\_NCAM\_SIGNALING\_FOR\_NEURITE\_OUT\_GROWTH;REACTOME\_L1CAM\_INTERACTIONS;RE  
E\_NCAM\_SIGNALING\_FOR\_NEURITE\_OUT\_GROWTH;REACTOME\_L1CAM\_INTERACTIONS;RE

ACTOME\_PHASE\_II\_CONJUGATION;REACTOME\_GLUCOSE\_METABOLISM  
\_MEDIATED\_INDUCION\_OF\_NFKB\_AND\_MAP\_KINASES\_UPON\_TLR7\_8\_OR\_9\_ACTIVATION;I

A\_CARBOXYLATION\_TRANSPORT\_AND\_AMINO\_TERMINAL\_CLEAVAGE\_OF\_PROTEINS;REAC

RNA\_SPLICING;REACTOME\_MRNA\_SPLICING\_MINOR\_PATHWAY

ICATION;REACTOME\_MITOTIC\_PROMETAPHASE

PLASMA\_MEMBRANE;REACTOME\_SIGNALLING\_TO\_ERKS;REACTOME\_P38MAPK\_EVENTS  
A\_CARBOXYLATION\_TRANSPORT\_AND\_AMINO\_TERMINAL\_CLEAVAGE\_OF\_PROTEINS;REACTO  
METABOLISM;REACTOME\_METABOLISM\_OF\_LIPIDS\_AND\_LIPOPROTEINS

ING

ING;REACTOME\_ENDOSOMAL\_SORTING\_COMPLEX\_REQUIRED\_FOR\_TRANSPORT\_ESCRT

SECRETION\_AND\_INACTIVATION\_OF\_GIP;REACTOME\_INCRETIN\_SYNTHESIS\_SECRET  
SECRETION\_AND\_INACTIVATION\_OF\_GIP;REACTOME\_INCRETIN\_SYNTHESIS\_SECRET  
HYDROXYCHOLESTEROL;REACTOME\_RECYCLING\_OF\_BILE\_ACIDS\_AND\_SALTS;REACTO



ME\_RECRUITMENT\_OF\_MITOTIC\_CENTROSOME\_PROTEINS\_AND\_COMPLEXES;REACTOME\_INTEGRIN\_ALPHAIIIB\_BETA3\_SIGNALING;REACTOME\_REGULATION\_OF\_INSULIN\_SECRETION\_AFTER\_RECEPTOR\_BINDING\_AND\_DOWNSTREAM\_TRANSMISSION\_IN\_THE\_POSTSYNAPTIC\_C

NTS;REACTOME\_CGMP\_EFFECTS;REACTOME\_NITRIC\_OXIDE\_STIMULATES\_GUANYLATE\_C

RFACE\_INTERACTIONS\_AT\_THE\_VASCULAR\_WALL;REACTOME\_PECAM1\_INTERACTIONS;REACTOME\_MATRIX\_METALLOPROTEIN\_DEGRADATION;REACTOME\_SIGNALING\_BY\_PDGF;REACTOME\_AXON\_GUIDANCE;REACTOME\_NCA

NE\_TRANSPORT\_OF\_SMALL\_MOLECULES;REACTOME\_SLC\_MEDIATED\_TRANSMEMBRANE

R\_SIGNALLING\_CASCADE;REACTOME\_NGF\_SIGNALLING\_VIA\_TRKA\_FROM\_THE\_PLASMA\_M

PTIDE\_LIGAND\_BINDING\_RECEPTORS;REACTOME\_CLASS\_A1\_RHODOPSIN\_LIKE\_RECEPTC

\_REPAIR

TER\_RELEASE\_CYCLE;REACTOME\_TRANSMEMBRANE\_TRANSPORT\_OF\_SMALL\_MOLECUL

.SIGNALING\_BY\_ERBB4;REACTOME\_SIGNALING\_BY\_ERBB2;REACTOME\_GRB2\_EVENTS\_IN\_

S

SPORT;REACTOME\_TRANSPORT\_OF\_INORGANIC\_CATIONS\_ANIONS\_AND\_AMINO\_ACIDS\_O  
GULATION\_OF\_TGF\_BETA\_RECEPTOR\_SIGNALING;REACTOME\_TGF\_BETA\_RECEPTOR\_SIG

.LIKE\_RECEPTORS;REACTOME\_CHEMOKINE\_RECEPTORS\_BIND\_CHEMOKINES;REACTOME\_

.FATTY\_ACID\_TRIACYLGLYCEROL\_AND\_KETONE\_BODY\_METABOLISM;REACTOME\_METABO

;

ME\_OTHER\_SEMAPHORIN\_INTERACTIONS;REACTOME\_SEMA3A\_PAK\_DEPENDENT\_AXON\_F

FANCONI\_ANEMIA\_PATHWAY;REACTOME\_FANCONI\_ANEMIA\_PATHWAY;REACTOME\_DNA\_F

SMAD2\_3\_SMAD4\_TRANSCRIPTIONAL\_ACTIVITY;REACTOME\_GENERIC\_TRANSCRIPTION\_P/

SE;REACTOME\_PLATELET\_HOMEOSTASIS;REACTOME\_HEMOSTASIS;REACTOME\_POTASSIUM

\_LIKE\_RECEPTORS;REACTOME\_GPCR\_DOWNSTREAM\_SIGNALING;REACTOME\_G\_ALPHA\_I

\_METABOLISM\_OF\_PROTEINS;REACTOME\_POST\_TRANSLATIONAL\_PROTEIN\_MODIFICATIO

ROTEIN\_RESPONSE

\_ALPHA\_BETA\_PATHWAYS;REACTOME\_INNATE\_IMMUNE\_SYSTEM;REACTOME\_IMMUNE\_SY:  
\_ALPHA\_BETA\_PATHWAYS;REACTOME\_INNATE\_IMMUNE\_SYSTEM;REACTOME\_IMMUNE\_SY:

FTER\_RECEPTOR\_BINDING\_AND\_DOWNSTREAM\_TRANSMISSION\_IN\_THE\_POSTSYNAPTIC\_

SPORT;REACTOME\_TRANSPORT\_OF\_INORGANIC\_CATIONS\_ANIONS\_AND\_AMINO\_ACIDS\_O

PHASES

AMINOGLYCAN\_METABOLISM;REACTOME\_METABOLISM\_OF\_CARBOHYDRATES

TIONAL\_PROTEIN\_MODIFICATION

SPORT;REACTOME\_TRANSPORT\_OF\_INORGANIC\_CATIONS\_ANIONS\_AND\_AMINO\_ACIDS\_O  
EINS\_AND\_COMPLEXES;REACTOME\_LOSS\_OF\_NLP\_FROM\_MITOTIC\_CENTROSOMES;REAC

SPORT;REACTOME\_TRANSPORT\_OF\_INORGANIC\_CATIONS\_ANIONS\_AND\_AMINO\_ACIDS\_O

OTOME\_GASTRIN\_CREB\_SIGNALLING\_PATHWAY\_VIA\_PKC\_AND\_MAPK;REACTOME\_NRAGE\_  
OTOME\_GASTRIN\_CREB\_SIGNALLING\_PATHWAY\_VIA\_PKC\_AND\_MAPK;REACTOME\_NRAGE\_

LING\_CASCADE;REACTOME\_REGULATION\_OF\_AMPK\_ACTIVITY\_VIA\_LKB1;REACTOME\_ENEI

Y\_METABOLISM

FATTY\_ACID\_TRIACYLGLYCEROL\_AND\_KETONE\_BODY\_METABOLISM;REACTOME\_CHOLES'

INSTREAM\_SIGNALING;REACTOME\_G\_ALPHA\_S\_SIGNALLING\_EVENTS

OME\_MAINTENANCE;REACTOME\_DEPOSITION\_OF\_NEW\_CENPA\_CONTAINING\_NUCLEOSOM

E\_IL\_7\_SIGNALING;REACTOME\_SIGNALING\_BY\_ERBB4;REACTOME\_SIGNALING\_BY\_ERBB2;F  
PLICATION\_STRESS;REACTOME\_G2\_M\_CHECKPOINTS

E\_DERMATAN\_SULFATE\_METABOLISM;REACTOME\_HEPARAN\_SULFATE\_HEPARIN\_HS\_GAC

SPHINGOLIPID\_METABOLISM;REACTOME\_PHOSPHOLIPID\_METABOLISM;REACTOME\_THE\_/'

ACTOME\_SEMAPHORIN\_INTERACTIONS

\\_B1\_ASSOCIATED\_EVENTS\_DURING\_G2\_M\_TRANSITION;REACTOME\_MITOTIC\_G2\_G2\_M\_P  
\\_B1\_ASSOCIATED\_EVENTS\_DURING\_G2\_M\_TRANSITION;REACTOME\_MITOTIC\_G2\_G2\_M\_P  
\ACTOME\_CYTOKINE\_SIGNALING\_IN\_IMMUNE\_SYSTEM  
\ACTOME\_CYTOKINE\_SIGNALING\_IN\_IMMUNE\_SYSTEM

OSTASIS;REACTOME\_HEMOSTASIS

OME\_SIGNALING\_BY\_FGFR\_IN\_DISEASE;REACTOME\_SIGNALING\_BY\_FGFR\_MUTANTS;REAC  
OME\_SIGNALING\_BY\_FGFR\_IN\_DISEASE;REACTOME\_SIGNALING\_BY\_FGFR\_MUTANTS;REAC  
OME\_SIGNALING\_BY\_FGFR\_IN\_DISEASE;REACTOME\_SIGNALING\_BY\_FGFR\_MUTANTS;REAC

OME\_PEPTIDE\_CHAIN\_ELONGATION;REACTOME\_METABOLISM\_OF\_PROTEINS;REACTOME  
OME\_GPCR\_LIGAND\_BINDING

GINE\_N\_LINKED\_GLYCOSYLATION;REACTOME\_TRANSPORT\_TO\_THE\_GOLGI\_AND\_SUBSEC  
SIS\_OF\_SUBSTRATES\_IN\_N\_GLYCAN\_BIOSYTHESIS;REACTOME\_ASPARAGINE\_N\_LINKED\_G

DIATED\_VESICLE\_BIOGENESIS

OME\_DOUBLE\_STRAND\_BREAK\_REPAIR;REACTOME\_DNA\_REPAIR

NALING\_BY\_EGFR\_IN\_CANCER;REACTOME\_ANTIGEN\_ACTIVATES\_B\_CELL\_RECEPTOR\_LEA

ACTOME\_PEPTIDE\_CHAIN\_ELONGATION;REACTOME\_METABOLISM\_OF\_PROTEINS;REACTOME

ING\_OF\_ACTIVATED\_FGFR;REACTOME\_SIGNALING\_BY\_FGFR

SPORT;REACTOME\_TRANSPORT\_OF\_VITAMINS\_NUCLEOSIDES\_AND\_RELATED\_MOLECULE

ME\_NEURONAL\_SYSTEM

;REACTOME\_METABOLISM\_OF\_CARBOHYDRATES



REACTOME\_LIPOPROTEIN\_METABOLISM

PROCESSING\_PRESENTATION;REACTOME\_ANTIGEN\_PROCESSING\_UBIQUITINATION\_PROTEA

SM;REACTOME\_GLYCOSAMINOGLYCAN\_METABOLISM;REACTOME\_METABOLISM\_OF\_CARB  
\_B\_CELLS;REACTOME\_SIGNALING\_BY\_THE\_B\_CELL\_RECEPTOR\_BCR;REACTOME\_TCR\_SIG

ALPHA\_Q\_SIGNALLING\_EVENTS;REACTOME\_GPCR\_DOWNSTREAM\_SIGNALING;REACTOME

:CULES

ON\_OF\_IKKS\_COMPLEX;REACTOME\_MAP\_KINASE\_ACTIVATION\_IN\_TLR\_CASCADE;REACTOI

3;REACTOME\_METABOLISM\_OF\_PROTEINS

ON\_TRANSPORT;REACTOME\_METABOLISM\_OF\_AMINO\_ACIDS\_AND\_DERIVATIVES;REACTO  
NALING\_BY\_EGFR\_IN\_CANCER;REACTOME\_NGF\_SIGNALLING\_VIA\_TRKA\_FROM\_THE\_PLAS  
IN\_LIKE\_GROWTH\_FACTOR\_BINDING\_PROTEINS\_IGFBPS

TIONAL\_PROTEIN\_MODIFICATION

ING

SIGNALING\_BY\_NOTCH

\_INTERACTIONS\_AT\_THE\_VASCULAR\_WALL;REACTOME\_COLLAGEN\_FORMATION;REACTOI  
CESSING\_PRESENTATION;REACTOME\_ANTIGEN\_PROCESSING\_UBIQUITINATION\_PROTEA

\_METABOLISM\_OF\_PROTEINS;REACTOME\_POST\_TRANSLATIONAL\_PROTEIN\_MODIFICATION;  
IFR1\_FUSION\_MUTANTS;REACTOME\_SIGNALING\_BY\_FGFR\_MUTANTS

REACTOME\_ANTIGEN\_PROCESSING\_CROSS\_PRESENTATION;REACTOME\_ER\_PHAGOSOMES;  
M\_CHROMATIN;REACTOME\_ASSOCIATION\_OF\_LICENSING\_FACTORS\_WITH\_THE\_PRE\_REF

JUNCTION\_ORGANIZATION  
)ING

.ALPHA\_Q\_SIGNALLING\_EVENTS;REACTOME\_GPCR\_DOWNSTREAM\_SIGNALING;REACTOME  
.ALPHA\_Q\_SIGNALLING\_EVENTS;REACTOME\_GPCR\_DOWNSTREAM\_SIGNALING;REACTOME  
I\_TUBERCULOSIS;REACTOME\_TRANSMEMBRANE\_TRANSPORT\_OF\_SMALL\_MOLECULES;RE

CTION\_OF\_HOMO\_SAPIENS\_WITH\_MYCOBACTERIUM\_TUBERCULOSIS;REACTOME\_ENOS\_A  
RPP\_32\_EVENTS;REACTOME\_AXON\_GUIDANCE;REACTOME\_CRMP5\_IN\_SEMA3A\_SIGNALIN  
LING\_CASCADE;REACTOME\_INTEGRATION\_OF\_ENERGY\_METABOLISM;REACTOME\_REGUL  
LING\_CASCADE;REACTOME\_INTEGRATION\_OF\_ENERGY\_METABOLISM;REACTOME\_REGUL

CESSING\_PRESENTATION;REACTOME\_ANTIGEN\_PROCESSING\_UBIQUITINATION\_PROTEA

GINE\_N\_LINKED\_GLYCOSYLATION

ASIS

CEPTOR\_SIGNALLING\_CASCADE;REACTOME\_SIGNALING\_BY\_FGFR\_IN\_DISEASE;REACTOM  
CEPTOR\_SIGNALLING\_CASCADE;REACTOME\_SIGNALING\_BY\_FGFR\_IN\_DISEASE;REACTOM

PLACEMENT\_PATHWAY;REACTOME\_BASE\_FREE\_SUGAR\_PHOSPHATE\_REMOVAL\_VIA\_THE

NTS

FUNCTIONAL\_REGULATION\_OF\_WHITE\_ADIPOCYTE\_DIFFERENTIATION;REACTOME\_HORMONE\_S

REACTOME\_FATTY\_ACID\_TRIACYLGLYCEROL\_AND\_KETONE\_BODY\_METABOLISM

REACTOME\_FATTY\_ACID\_TRIACYLGLYCEROL\_AND\_KETONE\_BODY\_METABOLISM

S

ANNELS

PROTEINASE\_MEDIATED\_CLEAVAGE\_OF\_CYTOSKELETAL\_PROTEINS;REACTOME\_CELL\_JUNCTION\_(

FUNCTIONS;REACTOME\_NEURONAL\_SYSTEM;REACTOME\_NEUROTRANSMITTER\_RELEASE\_CYCLE;F

MITOCHONDRIAL\_TRANSCRIPTION;REACTOME\_RNA\_POL\_III\_TRANSCRIPTION\_TERMINATION

SPORT;REACTOME\_TRANSPORT\_OF\_INORGANIC\_CATIONS\_ANIONS\_AND\_AMINO\_ACIDS\_O

REACTOME\_RESPIRATORY\_ELECTRON\_TRANSPORT\_ATP\_SYNTHESIS\_BY\_CHEMIOSMOTIC  
JUNCTION\_ORGANIZATION

S;REACTOME\_NGF\_SIGNALLING\_VIA\_TRKA\_FROM\_THE\_PLASMA\_MEMBRANE;REACTOME\_S

.IN\_LIKE\_GROWTH\_FACTOR\_BINDING\_PROTEINS\_IGFBPS  
EINS\_AND\_COMPLEXES;REACTOME\_LOSS\_OF\_NLP\_FROM\_MITOTIC\_CENTROSOMES;REAC

ALING\_BY\_ERBB2;REACTOME\_SIGNALING\_BY\_EGFR\_IN\_CANCER;REACTOME\_PI3K\_EVENTS

PROCESSING\_PRESENTATION;REACTOME\_ANTIGEN\_PROCESSING\_UBIQUITINATION\_PROTEASOMES;REACTOME\_NEURONAL\_SYSTEM;REACTOME\_NEUROTRANSMITTER\_RELEASE\_CYCLE;F

CELL\_COMMUNICATION;REACTOME\_CASPASE\_MEDIATED\_CLEAVAGE\_OF\_CYTOSKELETAL\_I  
CELL\_COMMUNICATION;REACTOME\_CASPASE\_MEDIATED\_CLEAVAGE\_OF\_CYTOSKELETAL\_I  
CELL\_COMMUNICATION;REACTOME\_CASPASE\_MEDIATED\_CLEAVAGE\_OF\_CYTOSKELETAL\_I  
CELL\_COMMUNICATION;REACTOME\_CASPASE\_MEDIATED\_CLEAVAGE\_OF\_CYTOSKELETAL\_I

AMINO\_ACID\_TRANSMINATION;REACTOME\_TRYPTOPHAN\_CATABOLISM  
AMINO\_ACID\_TRANSMINATION;REACTOME\_TRYPTOPHAN\_CATABOLISM  
SYNTHESIS\_OF\_SUBSTRATES\_IN\_N\_GLYCAN\_BIOSYTHESIS;REACTOME\_ASPARAGINE\_N\_LINKED\_G

EVENTS;REACTOME\_NGF\_SIGNALLING\_VIA\_TRKA\_FROM\_THE\_PLASMA\_MEMBRANE;REACTO

MECHANISMS;REACTOME\_TRANSCRIPTION;REACTOME\_RNA\_POL\_I\_RNA\_POL\_III\_AND\_MITOCHONDRIAL  
PLASMA\_MEMBRANE;REACTOME\_SIGNALLING\_TO\_ERKS;REACTOME\_P38MAPK\_EVENTS

FORMATION;REACTOME\_SIGNALING\_BY\_PDGF;REACTOME\_AXON\_GUIDANCE;REACTOME\_NCA  
FORMATION;REACTOME\_SIGNALING\_BY\_PDGF;REACTOME\_AXON\_GUIDANCE;REACTOME\_NCA  
FORMATION;REACTOME\_SIGNALING\_BY\_PDGF;REACTOME\_AXON\_GUIDANCE;REACTOME\_NCA

MEDIATED\_NFKB\_ACTIVATION;REACTOME\_RIG\_I\_MDA5\_MEDIATED\_INDUCTION\_OF\_IFN\_ALPHA  
GLYCOSYLATION;REACTOME\_CALNEXIN\_CALRETICULIN\_CYCLE;REACTOME\_TRANSPORT;  
SPORT;REACTOME\_TRANSPORT\_OF\_INORGANIC\_CATIONS\_ANIONS\_AND\_AMINO\_ACIDS\_O

RT;REACTOME\_STEROID\_HORMONES;REACTOME\_METABOLISM\_OF\_LIPIDS\_AND\_LIPOPRC  
RT;REACTOME\_STEROID\_HORMONES;REACTOME\_METABOLISM\_OF\_LIPIDS\_AND\_LIPOPRC

NS;REACTOME\_GRB2\_SOS\_PROVIDES\_LINKAGE\_TO\_MAPK\_SIGNALING\_FOR\_INTERGRINS\_

:SIS;REACTOME\_TRANSMISSION\_ACROSS\_CHEMICAL\_SYNAPSES;REACTOME\_NEURONAL\_



ATE\_TYPE;REACTOME\_PHASE1\_FUNCTIONALIZATION\_OF\_COMPOUNDS

\_SIGNALING\_BY\_THE\_B\_CELL\_RECEPTOR\_BCR;REACTOME\_SIGNALING\_BY\_ILS;REACTOME

AMINOGLYCAN\_METABOLISM;REACTOME\_METABOLISM\_OF\_CARBOHYDRATES

FORMATION;REACTOME\_CELL\_JUNCTION\_ORGANIZATION

M\_SIGNALING\_FOR\_NEURITE\_OUT\_GROWTH

MEDIATED\_ATTRACTIVE\_SIGNALING;REACTOME\_FACTORS\_INVOLVED\_IN\_MEGAKARYOCYTI

MEDIATED\_ATTRACTIVE\_SIGNALING;REACTOME\_FACTORS\_INVOLVED\_IN\_MEGAKARYOCYTI

\_FUNCTIONALIZATION\_OF\_COMPOUNDS;REACTOME\_METABOLISM\_OF\_POLYAMINES

\_FUNCTIONALIZATION\_OF\_COMPOUNDS;REACTOME\_METABOLISM\_OF\_POLYAMINES

\_FUNCTIONALIZATION\_OF\_COMPOUNDS;REACTOME\_METABOLISM\_OF\_POLYAMINES

REACTOME\_ANTIGEN\_PROCESSING\_CROSS\_PRESENTATION;REACTOME\_ER\_PHAGOSOMI

DOWNREGULATION\_OF\_CELL\_SURFACE\_RECEPTORS\_BY\_RECRUITING\_THEM\_TO\_CLATHRIN\_ADAPTERS;REACTOME

\_METABOLISM\_OF\_PROTEINS;REACTOME\_POST\_TRANSLATIONAL\_PROTEIN\_MODIFICATION

\_METABOLISM\_OF\_PROTEINS;REACTOME\_POST\_TRANSLATIONAL\_PROTEIN\_MODIFICATION

\_METABOLISM\_OF\_PROTEINS;REACTOME\_POST\_TRANSLATIONAL\_PROTEIN\_MODIFICATION

\_METABOLISM\_OF\_PROTEINS;REACTOME\_POST\_TRANSLATIONAL\_PROTEIN\_MODIFICATION

\_METABOLISM\_OF\_PROTEINS;REACTOME\_POST\_TRANSLATIONAL\_PROTEIN\_MODIFICATION

UNE\_SYSTEM;REACTOME\_ADAPTIVE\_IMMUNE\_SYSTEM

ALING

ON;REACTOME\_RORA\_ACTIVATES\_CIRCADIAN\_EXPRESSION;REACTOME\_CIRCADIAN\_REPR

.M\_SIGNALING;REACTOME\_G\_ALPHA\_S\_SIGNALLING\_EVENTS;REACTOME\_CGMP\_EFFECTS  
TOME\_CYTOCHROME\_P450\_ARRANGED\_BY\_SUBSTRATE\_TYPE;REACTOME\_PHASE1\_FUNC

J\_CREB\_SIGNALLING\_PATHWAY\_VIA\_PKC\_AND\_MAPK;REACTOME\_SIGNALING\_BY\_GPCR;RI  
ON\_TRANSPORT;REACTOME\_PYRUVATE\_METABOLISM  
SPORT;REACTOME\_TRANSPORT\_OF\_GLUCOSE\_AND\_OTHER\_SUGARS\_BILE\_SALTS\_AND\_C  
ETAL\_PROTEINS;REACTOME\_APOPTOSIS;REACTOME\_APOPTOTIC\_EXECUTION\_PHASE

'IDS\_AND\_LIPOPROTEINS;REACTOME\_FATTY\_ACID\_TRIACYLGLYCEROL\_AND\_KETONE\_BOI  
EINS\_AND\_COMPLEXES;REACTOME\_LOSS\_OF\_NLP\_FROM\_MITOTIC\_CENTROSOMES;REAC

ALING

ALING

ALING

ON\_DEPENDENT\_MRNA\_DECAY;REACTOME\_METABOLISM\_OF\_RNA

ETABOLISM\_OF\_LIPIDS\_AND\_LIPOPROTEINS;REACTOME\_FATTY\_ACID\_TRIACYLGLYCEROL\_

PT\_TO\_CYTOPLASM;REACTOME\_MRNA\_PROCESSING;REACTOME\_TRANSPORT\_OF\_MATUI

ALING\_BY\_ERBB2;REACTOME\_SIGNALING\_BY\_EGFR\_IN\_CANCER;REACTOME\_PI3K\_EVENTS  
COSE\_METABOLISM  
ROTEIN\_RESPONSE

ESIS\_ON\_THE\_LAGGING\_STRAND;REACTOME\_CELL\_CYCLE\_MITOTIC;REACTOME\_M\_G1\_TRANSITION;  
ANNALS

NT\_AND\_PLATELET\_PRODUCTION;REACTOME\_KINESINS;REACTOME\_HEMOSTASIS;REACTOME

IVATES\_SMADS;REACTOME\_SIGNALING\_BY\_GPCR;REACTOME\_OPIOID\_SIGNALLING;REACTOME  
REACTOME\_RESPIRATORY\_ELECTRON\_TRANSPORT\_ATP\_SYNTHESIS\_BY\_CHEMIOSMOTIC  
TUBERCULOSIS;REACTOME\_TRANSMEMBRANE\_TRANSPORT\_OF\_SMALL\_MOLECULES;REACTOME

METABOLISM;REACTOME\_METABOLISM\_OF\_LIPIDS\_AND\_LIPOPROTEINS  
TRANSPORT;REACTOME\_TRANSPORT\_OF\_VITAMINS\_NUCLEOSIDES\_AND\_RELATED\_MOLECULES

M  
TRANSITION

REACTOME\_IMMUNE\_SYSTEM;REACTOME\_ADAPTIVE\_IMMUNE\_SYSTEM;REACTOME\_CLASS\_I\_MHC  
REACTOME\_METABOLISM\_OF\_LIPIDS\_AND\_LIPOPROTEINS;REACTOME\_FATTY\_ACID\_TRANSPORT;  
REACTOME\_CELL\_CYCLE\_CHECKPOINTS;REACTOME\_HOMOLOGOUS\_RECOMBINATION\_REPAIR\_OF\_DNA

ORGANIZATION;REACTOME\_MITOTIC\_PROMETAPHASE  
CELL\_JUNCTION\_ORGANIZATION

REACTION\_BETWEEN\_L1\_AND\_ANKYRINS

DEPENDENT\_MRNA\_DECAY;REACTOME\_METABOLISM\_OF\_RNA  
REACTOME\_NRAGE\_SIGNALS\_DEATH\_THROUGH\_JNK;REACTOME\_CELL\_DEATH\_SIGNALLING\_VIA\_CASPASES

ACTOME\_NRAGE\_SIGNALS\_DEATH\_THROUGH\_JNK;REACTOME\_CELL\_DEATH\_SIGNALLING\_VI  
ALING

;

S

\_ADAPTERS;REACTOME\_DEFENSINS;REACTOME\_TCR\_SIGNALING;REACTOME\_DOWNSTRE.

IESIS\_OF\_PIPS\_AT\_THE\_PLASMA\_MEMBRANE;REACTOME\_PI\_METABOLISM;REACTOME\_ME  
IESIS\_OF\_PIPS\_AT\_THE\_PLASMA\_MEMBRANE;REACTOME\_PI\_METABOLISM;REACTOME\_ME

ANSMEMBRANE\_TRANSPORT\_OF\_SMALL\_MOLECULES;REACTOME\_SLC\_MEDIATED\_TRANS

\_METABOLISM\_OF\_PROTEINS;REACTOME\_POST\_TRANSLATIONAL\_PROTEIN\_MODIFICATIO  
\_METABOLISM\_OF\_PROTEINS;REACTOME\_POST\_TRANSLATIONAL\_PROTEIN\_MODIFICATIO

NALING\_BY\_EGFR\_IN\_CANCER;REACTOME\_NGF\_SIGNALLING\_VIA\_TRKA\_FROM\_THE\_PLAS

:GRIN\_CELL\_SURFACE\_INTERACTIONS;REACTOME\_IMMUNE\_SYSTEM;REACTOME\_ADAPTIV

ATED\_TRANSFER\_OF\_SUBSTRATE\_TO\_CCT\_TRIC;REACTOME\_PROTEIN\_FOLDING;REACTO

OGLYCAN\_METABOLISM;REACTOME\_METABOLISM\_OF\_CARBOHYDRATES  
PLACEMENT\_PATHWAY;REACTOME\_BASE\_FREE\_SUGAR\_PHOSPHATE\_REMOVAL\_VIA\_THE

LIPIDS\_AND\_LIPOPROTEINS;REACTOME\_FATTY\_ACID\_TRIACYLGLYCEROL\_AND\_KETONE\_B  
STIMULATES\_GUANYLATE\_CYCLASE;REACTOME\_PLATELET\_HOMEOSTASIS;REACTOME\_HE

GINE\_N\_LINKED\_GLYCOSYLATION;REACTOME\_N\_GLYCAN\_TRIMMING\_IN\_THE\_ER\_AND\_CA  
I\_SIGNALING;REACTOME\_IMMUNE\_SYSTEM;REACTOME\_CYTOKINE\_SIGNALING\_IN\_IMMUNE

ICATION;REACTOME\_MITOTIC\_PROMETAPHASE  
ICATION;REACTOME\_MITOTIC\_PROMETAPHASE  
DIATED\_VESICLE\_BIOGENESIS

TIONAL\_PROTEIN\_MODIFICATION

IFR1\_FUSION\_MUTANTS;REACTOME\_SIGNALING\_BY\_FGFR\_MUTANTS

RIPTION\_COUPLED\_NER\_TC\_NER;REACTOME\_POL\_SWITCHING;REACTOME\_NUCLEOTIDE\_E

ACTOME\_FATTY\_ACID\_TRIACYLGLYCEROL\_AND\_KETONE\_BODY\_METABOLISM

FORMATION;REACTOME\_INTEGRIN\_CELL\_SURFACE\_INTERACTIONS;REACTOME\_SIGNALING\_E

ON\_COMPLEX\_;REACTOME\_ELONGATION\_ARREST\_AND\_RECOVERY;REACTOME\_RNA\_POL  
AMINO\_ACID\_TRANSPORT\_ACROSS\_THE\_PLASMA\_MEMBRANE;REACTOME\_TRANSMEMBRAN

\_BINDING\_RECEPTORS;REACTOME\_PROSTANOID\_LIGAND\_RECEPTORS;REACTOME\_GPCR

\_CELL\_EXTRACELLULAR\_MATRIX\_INTERACTIONS;REACTOME\_CELL\_JUNCTION\_ORGANIZA

ASS\_A1\_RHODOPSIN\_LIKE\_RECEPTORS;REACTOME\_G\_ALPHA\_Q\_SIGNALLING\_EVENTS;RE

ACTOME\_CYTOKINE\_SIGNALING\_IN\_IMMUNE\_SYSTEM

SIGNALING\_BY\_NOTCH

NT\_AND\_PLATELET\_PRODUCTION;REACTOME\_KINESINS;REACTOME\_HEMOSTASIS;REACTO

\_TETRAHYDROBIOPTERIN\_BH4\_SYNTHESIS\_RECYCLING\_SALVAGE\_AND\_REGULATION;REA

SIGNALING\_BY\_NOTCH2;REACTOME\_SIGNALING\_BY\_NOTCH1;REACTOME\_SIGNALING\_BY\_  
↓;REACTOME\_TRANSCRIPTION;REACTOME\_RNA\_POL\_I\_RNA\_POL\_III\_AND\_MITOCHONDRIAL

REACTOME\_ION\_CHANNEL\_TRANSPORT

PROCESSING\_PRESENTATION;REACTOME\_ANTIGEN\_PROCESSING\_UBIQUITINATION\_PROTEA  
PROCESSING\_PRESENTATION;REACTOME\_ANTIGEN\_PROCESSING\_UBIQUITINATION\_PROTEA

TER\_RECEPTOR\_BINDING\_AND\_DOWNSTREAM\_TRANSMISSION\_IN\_THE\_POSTSYNAPTIC\_

SIGNALING\_BY\_ROBO\_RECEPTOR

\_SYNAPSES;REACTOME\_NEURONAL\_SYSTEM;REACTOME\_SIGNALING\_BY\_GPCR;REACTOMI  
GROWTH;REACTOME\_L1CAM\_INTERACTIONS;REACTOME\_INTERACTION\_BETWEEN\_L1\_AND  
GROWTH;REACTOME\_L1CAM\_INTERACTIONS;REACTOME\_INTERACTION\_BETWEEN\_L1\_AND



\_POST\_TRANSLATIONAL\_MODIFICATION\_SYNTHESIS\_OF\_GPI\_ANCHORED\_PROTEINS;REAC

:REACTOME\_ION\_CHANNEL\_TRANSPORT

REACTOME\_AQUAPORIN\_MEDIATED\_TRANSPORT

OME\_CYTOCHROME\_P450\_ARRANGED\_BY\_SUBSTRATE\_TYPE;REACTOME\_PHASE1\_FUNC

3H\_JNK;REACTOME\_CELL\_DEATH\_SIGNALLING\_VIA\_NRAGE\_NRIF\_AND\_NADE;REACTOME\_

SPORT;REACTOME\_TRANSPORT\_OF\_GLUCOSE\_AND\_OTHER\_SUGARS\_BILE\_SALTS\_AND\_C

ITS

\_LIKE\_RECEPTORS;REACTOME\_GPCR\_DOWNSTREAM\_SIGNALING;REACTOME\_G\_ALPHA\_I

OME\_PEPTIDE\_CHAIN\_ELONGATION;REACTOME\_METABOLISM\_OF\_PROTEINS;REACTOME

IE\_PPARA\_ACTIVATES\_GENE\_EXPRESSION;REACTOME\_PRE\_NOTCH\_TRANSCRIPTION\_ANI  
IE\_PPARA\_ACTIVATES\_GENE\_EXPRESSION;REACTOME\_PRE\_NOTCH\_TRANSCRIPTION\_ANI  
IE\_PPARA\_ACTIVATES\_GENE\_EXPRESSION;REACTOME\_PRE\_NOTCH\_TRANSCRIPTION\_ANI  
NALING\_BY\_EGFR\_IN\_CANCER;REACTOME\_NGF\_SIGNALLING\_VIA\_TRKA\_FROM\_THE\_PLAS

ME\_CYTOKINE\_SIGNALING\_IN\_IMMUNE\_SYSTEM  
ME\_CYTOKINE\_SIGNALING\_IN\_IMMUNE\_SYSTEM

:CULES

GED\_BY\_THE\_EXON\_JUNCTION\_COMPLEX

INSULIN\_RECEPTOR;REACTOME\_MTORC1\_MEDIATED\_SIGNALLING;REACTOME\_PI3K\_CASCADE

TRANSMEMBRANE\_TRANSPORT\_OF\_SMALL\_MOLECULES;REACTOME\_PLATELET\_HOMEOSTASIS

INS;REACTOME\_HEMOSTASIS

COSE\_METABOLISM

5'CAP\_PROCESSING\_OF\_CAPPED\_INTRON\_CONTAINING\_PRE\_MRNA;REACTOME\_TRANSCRIPTION

OME\_PROCESSING\_OF\_CAPPED\_INTRON\_CONTAINING\_PRE\_MRNA;REACTOME\_TRANSPORT\_OF\_LIPID\_DIGESTION\_MOBILIZATION\_AND\_TRANSPORT;REACTOME\_LIPOPROTEIN\_METABOLISM

SPORT;REACTOME\_TRANSPORT\_OF\_INORGANIC\_CATIONS\_ANIONS\_AND\_AMINO\_ACIDS\_O

SPORT;REACTOME\_TRANSPORT\_OF\_INORGANIC\_CATIONS\_ANIONS\_AND\_AMINO\_ACIDS\_O

REACTOME\_PACKAGING\_OF\_TELOMERE\_ENDS;REACTOME\_TELOMERE\_MAINTENANCE

NS;REACTOME\_INTEGRIN\_ALPHAIIIB\_BETA3\_SIGNALING;REACTOME\_SIGNALING\_BY\_PDGF;I

\_SIGNALING\_BY\_THE\_B\_CELL\_RECEPTOR\_BCR;REACTOME\_GPVI\_MEDIATED\_ACTIVATION\_

ON;REACTOME\_RNA\_POL\_I\_RNA\_POL\_III\_AND\_MITOCHONDRIAL\_TRANSCRIPTION;REACTO

VA\_SPLICING;REACTOME\_MRNA\_SPLICING\_MINOR\_PATHWAY

CEDED\_BY\_THE\_EXON\_JUNCTION\_COMPLEX  
CEDED\_BY\_THE\_EXON\_JUNCTION\_COMPLEX

FTER\_RECEPTOR\_BINDING\_AND\_DOWNSTREAM\_TRANSMISSION\_IN\_THE\_POSTSYNAPTIC\_

PROCESSING\_PRESENTATION;REACTOME\_ANTIGEN\_PROCESSING\_UBIQUITINATION\_PROTEA

SPORT;REACTOME\_TRANSPORT\_OF\_GLUCOSE\_AND\_OTHER\_SUGARS\_BILE\_SALTS\_AND\_C

SPED\_INTRON\_CONTAINING\_PRE\_MRNA;REACTOME\_RNA\_POL\_II\_TRANSCRIPTION;REACTC

ETABOLISM;REACTOME\_SIGNALING\_BY\_GPCR;REACTOME\_GPVI\_MEDIATED\_ACTIVATION\_C

AMINOGLYCAN\_METABOLISM;REACTOME\_METABOLISM\_OF\_CARBOHYDRATES

IE\_SIGNALING\_BY\_ERBB4;REACTOME\_NUCLEAR\_SIGNALING\_BY\_ERBB4;REACTOME\_PPAR,  
IE\_SIGNALING\_BY\_ERBB4;REACTOME\_NUCLEAR\_SIGNALING\_BY\_ERBB4;REACTOME\_PPAR,

ATED\_TAK1\_MEDIATES\_P38\_MAPK\_ACTIVATION;REACTOME\_TRAF6\_MEDIATED\_INDUCTION,  
STIMULATES\_GUANYLATE\_CYCLASE;REACTOME\_PLATELET\_HOMEOSTASIS;REACTOME\_HE  
SPORT;REACTOME\_TRANSPORT\_OF\_GLUCOSE\_AND\_OTHER\_SUGARS\_BILE\_SALTS\_AND\_C  
SPORT;REACTOME\_TRANSPORT\_OF\_GLUCOSE\_AND\_OTHER\_SUGARS\_BILE\_SALTS\_AND\_C

IFR1\_FUSION\_MUTANTS;REACTOME\_SIGNALING\_BY\_FGFR\_MUTANTS

DOWN\_OF\_CELL\_SURFACE\_RECEPTORS\_BY\_RECRUITING\_THEM\_TO\_CLATHRIN\_ADAPTERS;RE/

IL\_SYSTEM;REACTOME\_AXON\_GUIDANCE;REACTOME\_NCAM1\_INTERACTIONS;REACTOME\_  
TOME\_PEPTIDE\_CHAIN\_ELONGATION;REACTOME\_METABOLISM\_OF\_PROTEINS;REACTOME,

ING\_BY\_ERBB2;REACTOME\_GRB2\_EVENTS\_IN\_ERBB2\_SIGNALING;REACTOME\_PI3K\_EVENTS\_IN\_ERBB2\_SIGNALING;  
\_LIKE\_RECEPTORS;REACTOME\_CHEMOKINE\_RECEPTORS\_BIND\_CHEMOKINES;REACTOME

LING;REACTOME\_NGF\_SIGNALLING\_VIA\_TRKA\_FROM\_THE\_PLASMA\_MEMBRANE;REACTOME\_NGF\_SIGNALLING\_VIA\_TRKA\_FROM\_THE\_PLASMA\_MEMBRANE;  
LING;REACTOME\_NGF\_SIGNALLING\_VIA\_TRKA\_FROM\_THE\_PLASMA\_MEMBRANE;REACTOME\_NGF\_SIGNALLING\_VIA\_TRKA\_FROM\_THE\_PLASMA\_MEMBRANE;  
LING;REACTOME\_NGF\_SIGNALLING\_VIA\_TRKA\_FROM\_THE\_PLASMA\_MEMBRANE;REACTOME

FTER\_RECEPTOR\_BINDING\_AND\_DOWNSTREAM\_TRANSMISSION\_IN\_THE\_POSTSYNAPTIC\_TERMINAL;  
PROCESSING\_PRESENTATION;REACTOME\_ANTIGEN\_PROCESSING\_UBIQUITINATION\_PROTEASOMAL\_ACTIVITY

\_INTERACTIONS\_AT\_THE\_VASCULAR\_WALL;REACTOME\_COLLAGEN\_FORMATION;REACTOME\_COLLAGEN\_DEGRADATION

;REACTOME\_MEIOTIC\_RECOMBINATION;REACTOME\_HEMOSTASIS

PTOR\_SIGNALING;REACTOME\_NUCLEAR\_SIGNALING\_BY\_ERBB4;REACTOME\_DIABETES\_PATHOGENESIS;  
REACTION\_BETWEEN\_L1\_AND\_ANKYRINS

:REACTOME\_TRANSMEMBRANE\_TRANSPORT\_OF\_SMALL\_MOLECULES

IE\_ENERGY\_DEPENDENT\_REGULATION\_OF\_MTOR\_BY\_LKB1\_AMPK;REACTOME\_PKB\_MEDI/

ME\_TRIGLYCERIDE\_BIOSYNTHESIS;REACTOME\_FATTY\_ACYL\_COA\_BIOSYNTHESIS;REACTO  
ME\_TRIGLYCERIDE\_BIOSYNTHESIS;REACTOME\_FATTY\_ACYL\_COA\_BIOSYNTHESIS;REACTO

GNALING\_BY\_GPCR;REACTOME\_CLASS\_B\_2\_SECRETIN\_FAMILY\_RECEPTORS;REACTOME\_I  
ICATION;REACTOME\_MITOTIC\_PROMETAPHASE

EINS\_AND\_COMPLEXES;REACTOME\_LOSS\_OF\_NLP\_FROM\_MITOTIC\_CENTROSOMES;REAC  
\_LIKE\_RECEPTORS;REACTOME\_GPCR\_DOWNSTREAM\_SIGNALING;REACTOME\_G\_ALPHA\_S

CTOME\_REGULATION\_OF\_WATER\_BALANCE\_BY\_RENAL\_AQUAPORINS

:EACTOME\_ION\_CHANNEL\_TRANSPORT

ON\_TRANSPORT;REACTOME\_CELL\_SURFACE\_INTERACTIONS\_AT\_THE\_VASCULAR\_WALL;F

JA\_SPLICING

SIS;REACTOME\_REGULATORY\_RNA\_PATHWAYS;REACTOME\_PROCESSING\_OF\_CAPPED\_IN

\_SIGNALING;REACTOME\_G\_ALPHA\_I\_SIGNALLING\_EVENTS;REACTOME\_GPCR\_LIGAND\_BIN

ME\_ANTIGEN\_ACTIVATES\_B\_CELL\_RECEPTOR\_LEADING\_TO\_GENERATION\_OF\_SECOND\_M  
3\_IN\_EMT\_EPITHELIAL\_TO\_MESENCHYMAL\_TRANSITION;REACTOME\_NRAGE\_SIGNALS\_DE/

I\_OF\_TRANSCRIPTION\_COUPLED\_NER\_TC\_NER\_REPAIR\_COMPLEX;REACTOME\_DNA\_REPA  
I\_OF\_TRANSCRIPTION\_COUPLED\_NER\_TC\_NER\_REPAIR\_COMPLEX;REACTOME\_DNA\_REPA

\_METABOLISM\_OF\_PROTEINS;REACTOME\_POST\_TRANSLATIONAL\_PROTEIN\_MODIFICATIO  
\_METABOLISM\_OF\_PROTEINS;REACTOME\_POST\_TRANSLATIONAL\_PROTEIN\_MODIFICATIO  
\_METABOLISM\_OF\_PROTEINS;REACTOME\_POST\_TRANSLATIONAL\_PROTEIN\_MODIFICATIO

IVE\_REGULATORS\_OF\_RIG\_I\_MDA5\_SIGNALING;REACTOME\_RIG\_I\_MDA5\_MEDIATED\_INDUCI



ASS\_A1\_RHODOPSIN\_LIKE\_RECEPTORS;REACTOME\_G\_ALPHA\_Q\_SIGNALLING\_EVENTS;RE  
:GRIN\_CELL\_SURFACE\_INTERACTIONS;REACTOME\_INTERFERON\_GAMMA\_SIGNALING;REA  
VALING;REACTOME\_INTERFERON\_SIGNALING;REACTOME\_IL\_6\_SIGNALING;REACTOME\_IMM

REACTOME\_LIPOPROTEIN\_METABOLISM;REACTOME\_CHYLOMICRON\_MEDIATED\_LIPID\_TRA  
REACTOME\_LIPOPROTEIN\_METABOLISM;REACTOME\_CHYLOMICRON\_MEDIATED\_LIPID\_TRA  
FASIS

BY\_ERBB2;REACTOME\_SIGNALING\_BY\_EGFR\_IN\_CANCER;REACTOME\_NGF\_SIGNALLING\_VI  
LING

INSTREAM\_SIGNALING;REACTOME\_G\_ALPHA\_S\_SIGNALLING\_EVENTS

JCOSE\_METABOLISM

JA\_SPLICING

JA\_SPLICING

YMAL\_TRANSITION;REACTOME\_DOWNREGULATION\_OF\_TGF\_BETA\_RECEPTOR\_SIGNALING  
CR;REACTOME\_G\_ALPHA1213\_SIGNALLING\_EVENTS;REACTOME\_GPCR\_DOWNSTREAM\_SIK

ASS\_A1\_RHODOPSIN\_LIKE\_RECEPTORS;REACTOME\_G\_ALPHA\_Q\_SIGNALLING\_EVENTS;RE

SPORT;REACTOME\_TRANSPORT\_OF\_INORGANIC\_CATIONS\_ANIONS\_AND\_AMINO\_ACIDS\_O

.METABOLISM;REACTOME\_METABOLISM\_OF\_LIPIDS\_AND\_LIPOPROTEINS

JA\_SPLICING

JA\_SPLICING

EACTION\_SEMAPHORIN\_INTERACTIONS;REACTOME\_SEMA4D\_INDUCED\_CELL\_MIGRATION

PLACEMENT\_PATHWAY;REACTOME\_CELL\_CYCLE;REACTOME\_PROCESSIVE\_SYNTHESIS\_O  
PLACEMENT\_PATHWAY;REACTOME\_CELL\_CYCLE;REACTOME\_PROCESSIVE\_SYNTHESIS\_O  
PLACEMENT\_PATHWAY;REACTOME\_CELL\_CYCLE;REACTOME\_PROCESSIVE\_SYNTHESIS\_O

INTER\_RECEPTOR\_BINDING\_AND\_DOWNSTREAM\_TRANSMISSION\_IN\_THE\_POSTSYNAPTIC\_  
UNE\_SYSTEM;REACTOME\_ADAPTIVE\_IMMUNE\_SYSTEM

ME\_SIGNAL\_REGULATORY\_PROTEIN\_SIRP\_FAMILY\_INTERACTIONS;REACTOME\_HEMOSTAS  
3;REACTOME\_METABOLISM\_OF\_PROTEINS  
M\_SIGNALING\_FOR\_NEURITE\_OUT\_GROWTH

ED\_PROTEINS;REACTOME\_POST\_TRANSLATIONAL\_PROTEIN\_MODIFICATION  
EINS\_AND\_COMPLEXES;REACTOME\_LOSS\_OF\_NLP\_FROM\_MITOTIC\_CENTROSOMES;REAC

INTER\_RECEPTOR\_BINDING\_AND\_DOWNSTREAM\_TRANSMISSION\_IN\_THE\_POSTSYNAPTIC\_

E\_ANTIVIRAL\_MECHANISM\_BY\_IFN\_STIMULATED\_GENES;REACTOME\_SIGNALING\_BY\_ERBB

SPORT;REACTOME\_TRANSPORT\_OF\_INORGANIC\_CATIONS\_ANIONS\_AND\_AMINO\_ACIDS\_O

SPORT;REACTOME\_TRANSPORT\_OF\_GLUCOSE\_AND\_OTHER\_SUGARS\_BILE\_SALTS\_AND\_C

S

REACTOME\_ION\_CHANNEL\_TRANSPORT

TRANSPORT\_OF\_SMALL\_MOLECULES;REACTOME\_GLUCAGON\_SIGNALING\_IN\_METABOLIC\_RE

TRANSPORT\_OF\_SMALL\_MOLECULES;REACTOME\_GLUCAGON\_SIGNALING\_IN\_METABOLIC\_RE

FORMATION;REACTOME\_SIGNALING\_BY\_PDGF;REACTOME\_AXON\_GUIDANCE;REACTOME\_NCA

FORMATION;REACTOME\_SIGNALING\_BY\_PDGF;REACTOME\_AXON\_GUIDANCE;REACTOME\_NCA

OME\_ACTIVATION\_OF\_CHAPERONE\_GENES\_BY\_XBP1S;REACTOME\_UNFOLDED\_PROTEIN\_

INS;REACTOME\_HEMOSTASIS

J\_CREB\_SIGNALLING\_PATHWAY\_VIA\_PKC\_AND\_MAPK;REACTOME\_RESPONSE\_TO\_ELEVAT

ETABOLISM;REACTOME\_METABOLISM\_OF\_LIPIDS\_AND\_LIPOPROTEINS

N\_SIGNALING;REACTOME\_IMMUNE\_SYSTEM;REACTOME\_CYTOKINE\_SIGNALING\_IN\_IMMUN

3H\_JNK;REACTOME\_CELL\_DEATH\_SIGNALLING\_VIA\_NRAGE\_NRIF\_AND\_NADE;REACTOME\_

PT\_TO\_CYTOPLASM;REACTOME\_RNA\_POL\_II\_TRANSCRIPTION;REACTOME\_MRNA\_PROCES

\_SURFACE\_INTERACTIONS\_AT\_THE\_VASCULAR\_WALL;REACTOME\_INTEGRIN\_CELL\_SURF

RMATION;REACTOME\_SIGNALING\_BY\_PDGF;REACTOME\_AXON\_GUIDANCE;REACTOME\_NCA

EINS\_AND\_COMPLEXES;REACTOME\_LOSS\_OF\_NLP\_FROM\_MITOTIC\_CENTROSOMES;REAC

TABOLISM;REACTOME\_METABOLISM\_OF\_LIPIDS\_AND\_LIPOPROTEINS

GNALING\_BY\_GPCR;REACTOME\_CLASS\_A1\_RHODOPSIN\_LIKE\_RECEPTORS;REACTOME\_NU

OM\_CHROMATIN;REACTOME\_CELL\_CYCLE\_MITOTIC;REACTOME\_CELL\_CYCLE\_CHECKPOINT

REACTOME\_SEMAPHORIN\_INTERACTIONS;REACTOME\_SEMA4D\_INDUCED\_CELL\_MIGRATION

REACTOME\_IL\_2\_SIGNALING;REACTOME\_IMMUNE\_SYSTEM;REACTOME\_CYTOKINE\_SIGNALIN

CELLULOSE\_METABOLISM;REACTOME\_GLYCEROPHOSPHOLIPID\_BIOSYNTHESIS;REACTOME\_METABOLISM

GLYCOGEN\_METABOLISM;REACTOME\_GLYCEROPHOSPHOLIPID\_BIOSYNTHESIS;REACTOME\_METABOLISM

MITOCHONDRIAL\_METABOLISM;REACTOME\_GLYCEROPHOSPHOLIPID\_BIOSYNTHESIS;REACTOME\_METABOLISM

REACTOME\_REGULATORY\_RNA\_PATHWAYS;REACTOME\_SIGNALING\_BY\_NOTCH

REACTOME\_TRANSCRIPTION;REACTOME\_RNA\_POL\_I\_RNA\_POL\_III\_AND\_MITOCHONDRIAL\_TRANSCRIPTION

REACTOME\_TRANSCRIPTION;REACTOME\_RNA\_POL\_I\_RNA\_POL\_III\_AND\_MITOCHONDRIAL\_TRANSCRIPTION

REACTOME\_TRANSCRIPTION;REACTOME\_RNA\_POL\_I\_RNA\_POL\_III\_AND\_MITOCHONDRIAL\_TRANSCRIPTION

REACTOME\_TRANSCRIPTION;REACTOME\_RNA\_POL\_I\_RNA\_POL\_III\_AND\_MITOCHONDRIAL\_TRANSCRIPTION

REACTOME\_TRANSCRIPTION;REACTOME\_RNA\_POL\_I\_RNA\_POL\_III\_AND\_MITOCHONDRIAL\_TRANSCRIPTION

REACTOME\_TRANSCRIPTION;REACTOME\_RNA\_POL\_I\_RNA\_POL\_III\_AND\_MITOCHONDRIAL\_TRANSCRIPTION

REACTOME\_TRANSCRIPTION;REACTOME\_RNA\_POL\_I\_RNA\_POL\_III\_AND\_MITOCHONDRIAL\_TRANSCRIPTION

REACTOME\_TRANSCRIPTION;REACTOME\_RNA\_POL\_I\_RNA\_POL\_III\_AND\_MITOCHONDRIAL\_TRANSCRIPTION

\_ALPHA\_BETA\_PATHWAYS;REACTOME\_INNATE\_IMMUNE\_SYSTEM;REACTOME\_IMMUNE\_SY:

TOSIS;REACTOME\_CELL\_DEATH\_SIGNALLING\_VIA\_NRAGE\_NRIF\_AND\_NADE;REACTOME\_P

ACTOME\_CELL\_CYCLE\_MITOTIC;REACTOME\_MRNA\_PROCESSING;REACTOME\_MRNA\_SPLI  
OCESSING\_PRESENTATION;REACTOME\_ANTIGEN\_PROCESSING\_UBIQUITINATION\_PROTEA

3H\_JNK;REACTOME\_CELL\_DEATH\_SIGNALLING\_VIA\_NRAGE\_NRIF\_AND\_NADE;REACTOME\_

ORPTION\_PATHWAY;REACTOME\_METABOLISM\_OF\_LIPIDS\_AND\_LIPOPROTEINS;REACTOME

ME\_SIGNALING\_BY\_NOTCH  
COSE\_METABOLISM

IDS\_AND\_LIPOPROTEINS;REACTOME\_FATTY\_ACID\_TRIACYLGLYCEROL\_AND\_KETONE\_BOI

HS\_GAG\_BIOSYNTHESIS;REACTOME\_HEPARAN\_SULFATE\_HEPARIN\_HS\_GAG\_METABOLISM  
SPORT;REACTOME\_TRANSPORT\_OF\_INORGANIC\_CATIONS\_ANIONS\_AND\_AMINO\_ACIDS\_O

:EACTOME\_ION\_CHANNEL\_TRANSPORT

E\_DERMATAN\_SULFATE\_METABOLISM;REACTOME\_HEPARAN\_SULFATE\_HEPARIN\_HS\_GAG  
ATELET\_CALCIIUM\_HOMEOSTASIS;REACTOME\_ION\_TRANSPORT\_BY\_P\_TYPE\_ATPASES;RE/  
TOME\_METABOLISM\_OF\_PROTEINS

\_BASIGIN\_INTERACTIONS;REACTOME\_AXON\_GUIDANCE;REACTOME\_L1CAM\_INTERACTION  
\_BASIGIN\_INTERACTIONS;REACTOME\_AXON\_GUIDANCE;REACTOME\_L1CAM\_INTERACTION

CTENSION\_OF\_TELOMERES

E\_SYSTEM;REACTOME\_CYTOKINE\_SIGNALING\_IN\_IMMUNE\_SYSTEM



AMINOGLYCAN\_METABOLISM;REACTOME\_METABOLISM\_OF\_CARBOHYDRATES  
INS\_AND\_COMPLEXES;REACTOME\_LOSS\_OF\_NLP\_FROM\_MITOTIC\_CENTROSOMES;REAC

SIGNALING\_BY\_NOTCH2;REACTOME\_SIGNALING\_BY\_NOTCH1;REACTOME\_SIGNALING\_BY\_

ME\_MITOTIC\_M\_M\_G1\_PHASES;REACTOME\_FACTORS\_INVOLVED\_IN\_MEGAKARYOCYTE\_DE

ROWTH;REACTOME\_L1CAM\_INTERACTIONS;REACTOME\_INTERACTION\_BETWEEN\_L1\_AND  
LIKE\_RECEPTORS;REACTOME\_GPCR\_LIGAND\_BINDING

ING

BIOLOGICAL\_OXIDATIONS;REACTOME\_PHASE\_II\_CONJUGATION

REACTOME\_TRANSMEMBRANE\_TRANSPORT\_OF\_SMALL\_MOLECULES;REACTOME\_METABO

SPORT;REACTOME\_TRANSPORT\_OF\_GLUCOSE\_AND\_OTHER\_SUGARS\_BILE\_SALTS\_AND\_C

AINS\_AND\_COMPLEXES;REACTOME\_LOSS\_OF\_NLP\_FROM\_MITOTIC\_CENTROSOMES;REAC  
AINS\_AND\_COMPLEXES;REACTOME\_LOSS\_OF\_NLP\_FROM\_MITOTIC\_CENTROSOMES;REAC

E\_SIGNALING\_BY\_ERBB4;REACTOME\_SIGNALING\_BY\_ERBB2;REACTOME\_SIGNALING\_BY\_C

.SE1\_FUNCTIONALIZATION\_OF\_COMPOUNDS

TOME\_SYNTHESIS\_OF\_PIPS\_AT\_THE\_PLASMA\_MEMBRANE;REACTOME\_PI\_METABOLISM;RE

PTIDE\_LIGAND\_BINDING\_RECEPTORS;REACTOME\_CLASS\_A1\_RHODOPSIN\_LIKE\_RECEPTC

OGLYCAN\_METABOLISM;REACTOME\_METABOLISM\_OF\_CARBOHYDRATES

VTIGEN\_PROCESSING\_CROSS\_PRESENTATION;REACTOME\_ENDOSOMAL\_VACUOLAR\_PATI

ASE\_MEDIATED\_CLEAVAGE\_OF\_CYTOSKELETAL\_PROTEINS;REACTOME\_CELL\_JUNCTION\_C

STIMULATES\_GUANYLATE\_CYCLASE;REACTOME\_PLATELET\_HOMEOSTASIS;REACTOME\_HE

TETRAHYDROBIOPTERIN\_BH4\_SYNTHESIS\_RECYCLING\_SALVAGE\_AND\_REGULATION;REA

ON\_DEPENDENT\_MRNA\_DECAY;REACTOME\_METABOLISM\_OF\_RNA  
A\_SPLICING

OF\_LIPIDS\_AND\_LIPOPROTEINS

OSPHINGOLIPID\_METABOLISM;REACTOME\_PHOSPHOLIPID\_METABOLISM;REACTOME\_THE\_  
E;REACTOME\_L1CAM\_INTERACTIONS;REACTOME\_RECYCLING\_PATHWAY\_OF\_L1;REACTOM

FTER\_RECEPTOR\_BINDING\_AND\_DOWNSTREAM\_TRANSMISSION\_IN\_THE\_POSTSYNAPTIC\_  
IG\_COMPLEXES;REACTOME\_P75NTR\_SIGNALS\_VIA\_NFKB;REACTOME\_NFKB\_IS\_ACTIVATED

VG\_CROSS\_PRESENTATION;REACTOME\_INTERFERON\_GAMMA\_SIGNALING;REACTOME\_INT  
E\_NCAM\_SIGNALING\_FOR\_NEURITE\_OUT\_GROWTH;REACTOME\_L1CAM\_INTERACTIONS;RE

.IN\_LIKE\_GROWTH\_FACTOR\_BINDING\_PROTEINS\_IGFBPS

NG\_RECEPTORS;REACTOME\_GPCR\_DOWNSTREAM\_SIGNALING;REACTOME\_G\_ALPHA\_I\_SI

NDRIAL\_TRANSCRIPTION;REACTOME\_RNA\_POL\_I\_TRANSCRIPTION\_INITIATION

LIPIDS\_AND\_LIPOPOTEINS;REACTOME\_FATTY\_ACID\_TRIACYLGLYCEROL\_AND\_KETONE\_E  
TOME\_TRANSMEMBRANE\_TRANSPORT\_OF\_SMALL\_MOLECULES

EINS\_AND\_COMPLEXES;REACTOME\_LOSS\_OF\_NLP\_FROM\_MITOTIC\_CENTROSOMES;REAC  
ELL\_COMMUNICATION;REACTOME\_INTEGRIN\_CELL\_SURFACE\_INTERACTIONS;REACTOME\_  
EDIATED\_NFKB\_ACTIVATION;REACTOME\_RIG\_I\_MDA5\_MEDIATED\_INDUCION\_OF\_IFN\_ALP

OME\_SIGNALING\_BY\_FGFR\_IN\_DISEASE;REACTOME\_ACTIVATED\_POINT\_MUTANTS\_OF\_FGI

TOME\_NRAGE\_SIGNALS\_DEATH\_THROUGH\_JNK;REACTOME\_CELL\_DEATH\_SIGNALLING\_VI  
I\_SIGNALING;REACTOME\_IMMUNE\_SYSTEM;REACTOME\_CYTOKINE\_SIGNALING\_IN\_IMMUNE  
CYCLIN\_E\_ASSOCIATED\_EVENTS\_DURING\_G1\_S\_TRANSITION\_;REACTOME\_G1\_PHASE;REA

SPORT;REACTOME\_TRANSPORT\_OF\_INORGANIC\_CATIONS\_ANIONS\_AND\_AMINO\_ACIDS\_O

F\_ENERGY\_METABOLISM;REACTOME\_REGULATION\_OF\_INSULIN\_SECRETION  
LING

EINS\_AND\_COMPLEXES;REACTOME\_LOSS\_OF\_NLP\_FROM\_MITOTIC\_CENTROSOMES;REAC  
SPORT;REACTOME\_TRANSPORT\_OF\_INORGANIC\_CATIONS\_ANIONS\_AND\_AMINO\_ACIDS\_O

IG\_COMPLEXES;REACTOME\_P75NTR\_SIGNALS\_VIA\_NFKB;REACTOME\_NFKB\_IS\_ACTIVATED

NDRIAL\_TRANSCRIPTION;REACTOME\_RNA\_POL\_III\_TRANSCRIPTION\_INITIATION\_FROM\_TY

TOME\_NRAGE\_SIGNALS\_DEATH\_THROUGH\_JNK;REACTOME\_CELL\_DEATH\_SIGNALLING\_VI

CTION\_ORGANIZATION;REACTOME\_CELL\_JUNCTION\_ORGANIZATION

GNALLING\_TO\_ERKS;REACTOME\_SIGNALLING\_TO\_P38\_VIA\_RIT\_AND\_RIN

SPORT;REACTOME\_TRANSPORT\_OF\_INORGANIC\_CATIONS\_ANIONS\_AND\_AMINO\_ACIDS\_O

:X;REACTOME\_SRP\_DEPENDENT\_COTRANSLATIONAL\_PROTEIN\_TARGETING\_TO\_MEMBRAI  
:EACTOME\_ION\_CHANNEL\_TRANSPORT  
:INS\_MEDIATED\_TRANSPORT;REACTOME\_TRANSMEMBRANE\_TRANSPORT\_OF\_SMALL\_MOI  
.IGAND\_GATED\_ION\_CHANNEL\_TRANSPORT

;REACTOME\_HEMOSTASIS;REACTOME\_PLATELET\_ACTIVATION\_SIGNALING\_AND\_AGGREG

'IDS\_AND\_LIPOPROTEINS;REACTOME\_FATTY\_ACID\_TRIACYLGLYCEROL\_AND\_KETONE\_BOI

E\_ROLE\_OF\_DCC\_IN\_REGULATING\_APOPTOSIS;REACTOME\_NETRIN1\_SIGNALING;REACTOI

R\_PHAGOSOME\_PATHWAY;REACTOME\_IMMUNOREGULATORY\_INTERACTIONS\_BETWEEN\_

ETABOLISM;REACTOME\_METABOLISM\_OF\_LIPIDS\_AND\_LIPOPROTEINS

GINE\_N\_LINKED\_GLYCOSYLATION;REACTOME\_CALNEXIN\_CALRETICULIN\_CYCLE;REACTOM  
ME\_PEPTIDE\_LIGAND\_BINDING\_RECEPTORS;REACTOME\_CLASS\_A1\_RHODOPSIN\_LIKE\_RE

ANNELS

.IN\_SECRETION;REACTOME\_POTASSIUM\_CHANNELS;REACTOME\_INWARDLY\_RECTIFYING\_  
SIGNALING\_BY\_NOTCH

ETABOLISM;REACTOME\_METABOLISM\_OF\_LIPIDS\_AND\_LIPOPROTEINS

.METABOLISM;REACTOME\_METABOLISM\_OF\_LIPIDS\_AND\_LIPOPROTEINS

\_CELL\_CYCLE\_MITOTIC;REACTOME\_COSTIMULATION\_BY\_THE\_CD28\_FAMILY;REACTOME\_C

ESIS;REACTOME\_METABOLISM\_OF\_CARBOHYDRATES;REACTOME\_HEMOSTASIS;REACTOM



RNA\_SPLICING;REACTOME\_MRNA\_SPLICING\_MINOR\_PATHWAY

GLYCEROL\_3\_PHOSPHATE\_BINDING\_AND\_DOWNSTREAM\_TRANSMISSION\_IN\_THE\_POSTSYNAPTIC\_TERMINAL

GLYCEROL\_3\_PHOSPHATE\_BINDING\_AND\_DOWNSTREAM\_TRANSMISSION\_IN\_THE\_POSTSYNAPTIC\_TERMINAL

GLYCEROL\_3\_PHOSPHATE\_BINDING\_AND\_DOWNSTREAM\_TRANSMISSION\_IN\_THE\_POSTSYNAPTIC\_TERMINAL

GLYCEROL\_3\_PHOSPHATE\_BINDING\_AND\_DOWNSTREAM\_TRANSMISSION\_IN\_THE\_POSTSYNAPTIC\_TERMINAL

REACTOME\_CYTOKINE\_SIGNALING\_IN\_IMMUNE\_SYSTEM

REACTOME\_RESPIRATORY\_ELECTRON\_TRANSPORT\_ATP\_SYNTHESIS\_BY\_CHEMIOSMOTIC\_MECHANISM

REACTOME\_CELL\_CYCLE\_CHECKPOINT\_COMPONENTS;REACTOME\_CELL\_CYCLE;REACTOME\_CELL\_CYCLE\_CHECKPOINT\_COMPONENTS

SPORT;REACTOME\_TRANSPORT\_OF\_INORGANIC\_CATIONS\_ANIONS\_AND\_AMINO\_ACIDS\_O

ERBB4;REACTOME\_PROLACTIN\_RECEPTOR\_SIGNALING;REACTOME\_NUCLEAR\_SIGNALING\_  
AMINOGLYCAN\_METABOLISM;REACTOME\_METABOLISM\_OF\_CARBOHYDRATES

DOWNSTREAM\_TCR\_SIGNALING;REACTOME\_P75NTR\_RECRUITS\_SIGNALLING\_COMPLEXES;

TOME\_GLYCEROPHOSPHOLIPID\_BIOSYNTHESIS;REACTOME\_METABOLISM\_OF\_LIPIDS\_AND

\_SIGNALING;REACTOME\_G\_ALPHA\_I\_SIGNALLING\_EVENTS;REACTOME\_GPCR\_LIGAND\_BIN  
HS\_GAG\_BIOSYNTHESIS;REACTOME\_HEPARAN\_SULFATE\_HEPARIN\_HS\_GAG\_METABOLISM

JUNCTION\_ORGANIZATION

ESICLE\_BUDDING;REACTOME\_SYNTHESIS\_OF\_PIPS\_AT\_THE\_GOLGI\_MEMBRANE;REACTOM

\_CASCADE;REACTOME\_INTRINSIC\_PATHWAY;REACTOME\_HEMOSTASIS;REACTOME\_PLATE

.BOLISM;REACTOME\_METABOLISM\_OF\_LIPIDS\_AND\_LIPOPROTEINS

OMPLEXES;REACTOME\_P75NTR\_SIGNALS\_VIA\_NFKB;REACTOME\_P75\_NTR\_RECEPTOR\_ME

REACTOME\_LIPOPROTEIN\_METABOLISM

\_SMALL\_MOLECULES;REACTOME\_SLC\_MEDIATED\_TRANSMEMBRANE\_TRANSPORT;REACTO

\_METABOLISM\_OF\_PROTEINS;REACTOME\_POST\_TRANSLATIONAL\_PROTEIN\_MODIFICATIO

H\_EXPRESSION\_AND\_PROCESSING;REACTOME\_PRE\_NOTCH\_PROCESSING\_IN\_GOLGI;REA

/;REACTOME\_COMPLEMENT\_CASCADE

\_OF\_VITAMINS\_AND\_COFACTORS;REACTOME\_CELL\_CYCLE;REACTOME\_ENOS\_ACTIVATION

FTER\_RECEPTOR\_BINDING\_AND\_DOWNSTREAM\_TRANSMISSION\_IN\_THE\_POSTSYNAPTIC\_

:SIS;REACTOME\_TRANSMEMBRANE\_TRANSPORT\_OF\_SMALL\_MOLECULES;REACTOME\_SLC  
FATTY\_ACID\_TRIACYLGLYCEROL\_AND\_KETONE\_BODY\_METABOLISM

;REACTOME\_RNA\_POL\_III\_TRANSCRIPTION;REACTOME\_RNA\_POL\_II\_TRANSCRIPTION\_PRE

\_SIGNALING\_BY\_THE\_B\_CELL\_RECEPTOR\_BCR;REACTOME\_IMMUNE\_SYSTEM;REACTOME\_

CTOME\_METABOLISM\_OF\_PROTEINS;REACTOME\_RESPIRATORY\_ELECTRON\_TRANSPORT;  
TEGRATION\_OF\_ENERGY\_METABOLISM;REACTOME\_G\_ALPHA\_Q\_SIGNALLING\_EVENTS;REA

SIS\_OF\_SUBSTRATES\_IN\_N\_GLYCAN\_BIOSYTHESIS;REACTOME\_ASPARAGINE\_N\_LINKED\_G

\_LIKE\_RECEPTORS;REACTOME\_CHEMOKINE\_RECEPTORS\_BIND\_CHEMOKINES;REACTOME

CTOME\_MEMBRANE\_TRAFFICKING;REACTOME\_TRANS\_GOLGI\_NETWORK\_VESICLE\_BUDDIN

F\_PROTEINS

FTER\_RECEPTOR\_BINDING\_AND\_DOWNSTREAM\_TRANSMISSION\_IN\_THE\_POSTSYNAPTIC

ME\_SIGNALING\_BY\_NOTCH

SPORT;REACTOME\_TRANSPORT\_OF\_INORGANIC\_CATIONS\_ANIONS\_AND\_AMINO\_ACIDS\_O

AN\_SULFATE\_METABOLISM;REACTOME\_HS\_GAG\_BIOSYNTHESIS;REACTOME\_HEPARAN\_S

I\_OF\_TRANSCRIPTION\_COUPLED\_NER\_TC\_NER\_REPAIR\_COMPLEX;REACTOME\_DNA\_REPA

SPORT;REACTOME\_TRANSPORT\_OF\_VITAMINS\_NUCLEOSIDES\_AND\_RELATED\_MOLECULE

IEDIATED\_ATTRACTIVE\_SIGNALING

R\_PHAGOSOME\_PATHWAY;REACTOME\_IMMUNOREGULATORY\_INTERACTIONS\_BETWEEN\_

TOME\_TRANSMEMBRANE\_TRANSPORT\_OF\_SMALL\_MOLECULES

ALPHA\_Q\_SIGNALLING\_EVENTS;REACTOME\_GPCR\_DOWNSTREAM\_SIGNALING;REACTOME

ALPHA\_Q\_SIGNALLING\_EVENTS;REACTOME\_GPCR\_DOWNSTREAM\_SIGNALING;REACTOME

ALING

3I\_MEMBRANE;REACTOME\_PHOSPHOLIPID\_METABOLISM;REACTOME\_SYNTHESIS\_OF\_PIP3  
JUNCTION\_ORGANIZATION  
ME\_CELL\_CYCLE\_CHECKPOINTS;REACTOME\_HOMOLOGOUS\_RECOMBINATION\_REPAIR\_OF  
ROTEIN\_RESPONSE

.SIGNALING\_BY\_ERBB4;REACTOME\_SIGNALING\_BY\_ERBB2;REACTOME\_SIGNALING\_BY\_CO  
NT\_AND\_PLATELET\_PRODUCTION;REACTOME\_KINESINS;REACTOME\_HEMOSTASIS;REACTO  
.IN\_SECRETION\_BY\_GLUCAGON\_LIKE\_PEPTIDE1;REACTOME\_REGULATION\_OF\_INSULIN\_SE

FTER\_RECEPTOR\_BINDING\_AND\_DOWNSTREAM\_TRANSMISSION\_IN\_THE\_POSTSYNAPTIC\_

.SIGNALING\_BY\_THE\_B\_CELL\_RECEPTOR\_BCR;REACTOME\_GPVI\_MEDIATED\_ACTIVATION\_

IASIS

FTER\_RELEASE\_CYCLE;REACTOME\_DOPAMINE\_NEUROTRANSMITTER\_RELEASE\_CYCLE



OME\_GPCR\_LIGAND\_BINDING

YCOBACTERIUM\_TUBERCULOSIS;REACTOME\_IMMUNE\_SYSTEM;REACTOME\_ADAPTIVE\_IMMUNES

TIONAL\_PROTEIN\_MODIFICATION

SPHINGOLIPID\_METABOLISM;REACTOME\_PHOSPHOLIPID\_METABOLISM;REACTOME\_THE\_M

ICATION

TIONAL\_PROTEIN\_MODIFICATION

EDIATED\_ATTRACTIVE\_SIGNALING

OME\_PROCESSING\_OF\_CAPPED\_INTRON\_CONTAINING\_PRE\_MRNA;REACTOME\_TRANSPOR

I\_TUBERCULOSIS;REACTOME\_TRANSMEMBRANE\_TRANSPORT\_OF\_SMALL\_MOLECULES;RE

E\_NUCLEOTIDE\_BINDING\_DOMAIN\_LEUCINE\_RICH\_REPEAT\_CONTAINING\_RECEPTOR\_NLR\_

:HYMAL\_TRANSITION;REACTOME\_CELL\_CELL\_JUNCTION\_ORGANIZATION;REACTOME\_TIGH

EDIATED\_ATTRACTIVE\_SIGNALING;REACTOME\_FACTORS\_INVOLVED\_IN\_MEGAKARYOCYTI

RMATION;REACTOME\_INTEGRIN\_CELL\_SURFACE\_INTERACTIONS;REACTOME\_SIGNALING\_B

.LIPIDS\_AND\_LIPOPROTEINS;REACTOME\_FATTY\_ACID\_TRIACYLGLYCEROL\_AND\_KETONE\_F  
V\_OF\_GENE\_EXPRESSION\_IN\_BETA\_CELLS  
RASIS

G\_BY\_HIPPO;REACTOME\_APOPTOTIC\_CLEAVAGE\_OF\_CELL\_ADHESION\_PROTEINS;REACTO  
FTER\_RECEPTOR\_BINDING\_AND\_DOWNSTREAM\_TRANSMISSION\_IN\_THE\_POSTSYNAPTIC\_

ON\_ORGANIZATION

IE\_ENERGY\_DEPENDENT\_REGULATION\_OF\_MTOR\_BY\_LKB1\_AMPK;REACTOME\_PKB\_MEDI/  
LIPIDS\_AND\_LIPOPROTEINS;REACTOME\_LIPID\_DIGESTION\_MOBILIZATION\_AND\_TRANSPOR

TIONAL\_PROTEIN\_MODIFICATION

TIONAL\_PROTEIN\_MODIFICATION

TOME\_SYNTHESIS\_OF\_PC;REACTOME\_GLYCEROPHOSPHOLIPID\_BIOSYNTHESIS;REACTOM

3H\_JNK;REACTOME\_CELL\_DEATH\_SIGNALLING\_VIA\_NRAGE\_NRIF\_AND\_NADE;REACTOME\_

TIVATES\_SMADS;REACTOME\_SIGNALING\_BY\_TGF\_BETA\_RECEPTOR\_COMPLEX

COSE\_METABOLISM

AINS\_AND\_COMPLEXES;REACTOME\_LOSS\_OF\_NLP\_FROM\_MITOTIC\_CENTROSOMES;REAC

E\_BINDING\_DOMAIN\_LEUCINE\_RICH\_REPEAT\_CONTAINING\_RECEPTOR\_NLR\_SIGNALING\_F

ATION\_OF\_SECOND\_MESSENGER\_MOLECULES;REACTOME\_IMMUNE\_SYSTEM;REACTOME

NT\_AND\_PLATELET\_PRODUCTION;REACTOME\_KINESINS;REACTOME\_HEMOSTASIS;REACTO  
M\_SIGNALING;REACTOME\_G\_ALPHA\_S\_SIGNALLING\_EVENTS;REACTOME\_GPCR\_LIGAND\_I

OME\_PEPTIDE\_CHAIN\_ELONGATION;REACTOME\_METABOLISM\_OF\_PROTEINS;REACTOME

E\_SIGNALING\_BY\_ERBB4;REACTOME\_SIGNALING\_BY\_ERBB2;REACTOME\_SIGNALING\_BY\_C

REACTOME\_ION\_CHANNEL\_TRANSPORT

REACTOME\_ION\_CHANNEL\_TRANSPORT

OME\_SIGNALING\_BY\_FGFR\_IN\_DISEASE;REACTOME\_ACTIVATED\_POINT\_MUTANTS\_OF\_FGI

\_LIKE\_RECEPTORS;REACTOME\_OPIOID\_SIGNALLING;REACTOME\_G\_PROTEIN\_ACTIVATION;  
SSION;REACTOME\_NRAGE\_SIGNALS\_DEATH\_THROUGH\_JNK;REACTOME\_CELL\_DEATH\_SIC

\_METABOLISM\_OF\_PROTEINS;REACTOME\_POST\_TRANSLATIONAL\_PROTEIN\_MODIFICATIO

Γ\_INTERACTIONS\_OF\_HIV\_FACTORS;REACTOME\_INTERACTIONS\_OF\_VPR\_WITH\_HOST\_CE

RACTIONS\_BETWEEN\_A\_LYMPHOID\_AND\_A\_NON\_LYMPHOID\_CELL;REACTOME\_CELL\_SURF

\_METABOLISM\_OF\_PROTEINS;REACTOME\_POST\_TRANSLATIONAL\_PROTEIN\_MODIFICATIO

:\_MEDIATED\_TRANSPORT;REACTOME\_TRANSMEMBRANE\_TRANSPORT\_OF\_SMALL\_MOLEC  
ON\_TRANSPORT;REACTOME\_PYRUVATE\_METABOLISM

M

SPORT;REACTOME\_TRANSPORT\_OF\_INORGANIC\_CATIONS\_ANIONS\_AND\_AMINO\_ACIDS\_O

CESSING\_PRESENTATION;REACTOME\_ANTIGEN\_PROCESSING\_UBIQUITINATION\_PROTEA

OTIC\_SPINDLE\_CHECKPOINT\_COMPONENTS;REACTOME\_CELL\_CYCLE;REACTOME\_CELL\_C

HEMOSTASIS

HEMOSTASIS;REACTOME\_HEMOSTASIS

TRANSPORT;REACTOME\_TRANSPORT\_OF\_INORGANIC\_CATIONS\_ANIONS\_AND\_AMINO\_ACIDS\_O

LIGAND\_RECEPTORS;REACTOME\_GPCR\_DOWNSTREAM\_SIGNALING;REACTOME\_G\_ALPHA

REACTOME\_TRANSMEMBRANE\_TRANSPORT\_OF\_SMALL\_MOLECULES

OF\_PROTEINS

TRANSPORT;REACTOME\_TRANSPORT\_OF\_GLUCOSE\_AND\_OTHER\_SUGARS\_BILE\_SALTS\_AND\_C

REACTOME\_TRANSMEMBRANE\_TRANSPORT\_OF\_SMALL\_MOLECULES

CELL SIGNALING

PEPTIDE\_LIGAND\_BINDING\_RECEPTORS;REACTOME\_CLASS\_A1\_RHODOPSIN\_LIKE\_RECEPTOR  
DOWNSTREAM\_SIGNALING\_FOR\_NEURITE\_OUT\_GROWTH

AT SYNAPSES;REACTOME\_NEURONAL\_SYSTEM;REACTOME\_SIGNALING\_BY\_GPCR;REACTOME  
HEMOSTASIS

CELL SIGNALING;REACTOME\_SIGNALING\_BY\_PDGF;REACTOME\_AXON\_GUIDANCE;REACTOME\_NCA

CELL SIGNALING;REACTOME\_P75NTR\_SIGNALS\_VIA\_NFKB;REACTOME\_NFKB\_IS\_ACTIVATED

\_PRE\_NOTCH\_EXPRESSION\_AND\_PROCESSING;REACTOME\_PRE\_NOTCH\_PROCESSING\_IN

ILS;REACTOME\_IL\_3\_5\_AND\_GM-CSF\_SIGNALING;REACTOME\_IL\_RECEPTOR\_SHC\_SIGNALI

3H\_JNK;REACTOME\_CELL\_DEATH\_SIGNALLING\_VIA\_NRAGE\_NRIF\_AND\_NADE;REACTOME\_  
E\_METABOLISM\_OF\_LIPIDS\_AND\_LIPOPROTEINS

:INS\_MEDIATED\_TRANSPORT;REACTOME\_TRANSMEMBRANE\_TRANSPORT\_OF\_SMALL\_MOI  
OSTASIS;REACTOME\_HEMOSTASIS  
IATED\_VESICLE\_BIOGENESIS

\_LIKE\_RECEPTORS;REACTOME\_GPCR\_DOWNSTREAM\_SIGNALING;REACTOME\_G\_ALPHA\_S

REACTOME\_SEMAPHORIN\_INTERACTIONS  
AL\_SYNAPSES;REACTOME\_NRAGE\_SIGNALS\_DEATH\_THROUGH\_JNK;REACTOME\_NEURON  
PHORYLATION\_CASCADE;REACTOME\_APOPTOSIS;REACTOME\_APOPTOTIC\_EXECUTION\_PI  
ATION

ESIS\_ON\_THE\_LAGGING\_STRAND;REACTOME\_CELL\_CYCLE\_MITOTIC;REACTOME\_M\_G1\_TR

ME\_SEMA3A\_PAK\_DEPENDENT\_AXON\_REPULSION;REACTOME\_SEMAPHORIN\_INTERACTIO

NDRIAL\_TRANSCRIPTION;REACTOME\_RNA\_POL\_III\_TRANSCRIPTION\_TERMINATION

LING

FATTY\_ACID\_TRIACYLGLYCEROL\_AND\_KETONE\_BODY\_METABOLISM

TIONAL\_PROTEIN\_MODIFICATION

NALING\_BY\_EGFR\_IN\_CANCER;REACTOME\_ANTIGEN\_ACTIVATES\_B\_CELL\_RECEPTOR\_LE/

ETIN\_SYNTHESIS\_SECRETION\_AND\_INACTIVATION;REACTOME\_SYNTHESIS\_SECRETION\_AI

REACTOME\_REGULATION\_OF\_MRNA\_STABILITY\_BY\_PROTEINS\_THAT\_BIND\_AU\_RICH\_ELEI

M\_SIGNALING\_FOR\_NEURITE\_OUT\_GROWTH

\_HYDROXYLATION\_OF\_HYPOXIA\_INDUCIBLE\_FACTOR\_ALPHA

IX;REACTOME\_ACTIVATION\_OF\_THE\_MRNA\_UPON\_BINDING\_OF\_THE\_CAP\_BINDING\_COMP

\_CASCADE;REACTOME\_INTRINSIC\_PATHWAY;REACTOME\_HEMOSTASIS;REACTOME\_PLATE



3;REACTOME\_HIV\_INFECTION;REACTOME\_HIV\_LIFE\_CYCLE;REACTOME\_LATE\_PHASE\_OF\_I

EINS

YPE\_3\_PROMOTER

AGENT\_MODIFICATION;REACTOME\_N\_GLYCAN\_ANTENNAE\_ELONGATION;REACTOME\_N\_GL

BINDING

I1\_INTRACELLULAR\_DOMAIN\_REGULATES\_TRANSCRIPTION;REACTOME\_SIGNALING\_BY\_NC

RT\_OF\_MATURE\_TRANSCRIPT\_TO\_CYTOPLASM;REACTOME\_TRANSMEMBRANE\_TRANSPOR

MA\_MEMBRANE;REACTOME\_SIGNALING\_BY\_FGFR\_IN\_DISEASE;REACTOME\_TRANSMISSION;  
SIGNALING;REACTOME\_NEGATIVE\_REGULATION\_OF\_FGFR\_SIGNALING;REACTOME\_CELL\_CYC

ORGANIC\_ACIDS\_METAL\_IONS\_AND\_AMINE\_COMPOUNDS;REACTOME\_FACILITATIVE\_NA\_IN

LEX\_AND\_EIFS\_AND\_SUBSEQUENT\_BINDING\_TO\_43S;REACTOME\_METABOLISM\_OF\_PROTI

;REACTOME\_REGULATED\_PROTEOLYSIS\_OF\_P75NTR;REACTOME\_P75NTR\_SIGNALS\_VIA\_N

\_OF\_SMALL\_MOLECULES;REACTOME\_SLC\_MEDIATED\_TRANSMEMBRANE\_TRANSPORT;RE

OHYDRATES



TOME\_RECRUITMENT\_OF\_NUMA\_TO\_MITOTIC\_CENTROSOMES;REACTOME\_MITOTIC\_G2\_G

;MA\_MEMBRANE;REACTOME\_SIGNALING\_BY\_FGFR\_IN\_DISEASE;REACTOME\_SIGNALING\_B'

ACTOME\_MRNA\_SPLICING;REACTOME\_PROCESSING\_OF\_CAPPED\_INTRONLESS\_PRE\_MRNA;R

P75\_NTR\_RECEPTOR\_MEDIATED\_SIGNALLING;REACTOME\_SIGNALING\_BY\_GPCR;REACTOM

S\_IN\_ERBB4\_SIGNALING;REACTOME\_PI3K\_EVENTS\_IN\_ERBB2\_SIGNALING;REACTOME\_DOV  
S\_IN\_ERBB4\_SIGNALING;REACTOME\_PI3K\_EVENTS\_IN\_ERBB2\_SIGNALING;REACTOME\_DOV

PLICATIVE\_COMPLEX;REACTOME\_E2F\_ENABLED\_INHIBITION\_OF\_PRE\_REPLICATION\_COMP

PRESSION;REACTOME\_YAP1\_AND\_WWTR1\_TAZ\_STIMULATED\_GENE\_EXPRESSION;REACTO

BY\_PDGF;REACTOME\_AXON\_GUIDANCE;REACTOME\_NCAM1\_INTERACTIONS;REACTOME\_NC  
P75\_NTR\_RECEPTOR\_MEDIATED\_SIGNALLING;REACTOME\_SIGNALING\_BY\_GPCR;REACTOM

ONSTITUTIVELY\_ACTIVE\_EGFR;REACTOME\_SIGNALING\_BY\_EGFR\_IN\_CANCER;REACTOME



REACTOME\_THE\_ROLE\_OF\_NEF\_IN\_HIV1\_REPLICATION\_AND\_DISEASE\_PATHOGENESIS  
SIGNALING\_BY\_NOTCH1;REACTOME\_GENERIC\_TRANSCRIPTION\_PATHWAY;REACTOME\_NC

LIGOPEPTIDES

/\_INFECTION;REACTOME\_HIV\_LIFE\_CYCLE;REACTOME\_LATE\_PHASE\_OF\_HIV\_LIFE\_CYCLE

LIGOPEPTIDES

PROTEINS;REACTOME\_LIPID\_DIGESTION\_MOBILIZATION\_AND\_TRANSPORT;REACTOME\_LIPOPI

N  
N

ATION

REACTOME\_IMMUNE\_SYSTEM;REACTOME\_ADAPTIVE\_IMMUNE\_SYSTEM

APOPTOSIS

SMAD3\_SMAD4\_HETEROTRIMER;REACTOME\_DOWNREGULATION\_OF\_SMAD2\_3\_SMAD4\_TRAN  
SCRIPTION\_AND\_ACTIVATION\_OF\_IKKS\_COMPLEX;REACTOME\_TRAF6\_MEDIATED\_NFKB\_ACT

PROTEIN\_DEGRADATION

OLIGOPEPTIDES

S;REACTOME\_TRANSPORT\_OF\_ORGANIC\_ANIONS

REACTOME\_TRANSMEMBRANE\_TRANSPORT\_OF\_SMALL\_MOLECULES;REACTOME\_SLC\_MEI

\_SIGNALLING\_EVENTS;REACTOME\_GPCR\_LIGAND\_BINDING

:\_FATTY\_ACID\_TRIACYLGLYCEROL\_AND\_KETONE\_BODY\_METABOLISM;REACTOME\_TRANS

1E\_PHOSPHOLIPID\_METABOLISM;REACTOME\_PI\_METABOLISM;REACTOME\_GOLGI\_ASSOCI/

.SOME\_DEGRADATION

ME\_G\_ALPHA\_Q\_SIGNALLING\_EVENTS;REACTOME\_GPCR\_DOWNSTREAM\_SIGNALING;REAC

ONSTITUTIVELY\_ACTIVE\_EGFR;REACTOME\_SIGNALING\_BY\_EGFR\_IN\_CANCER;REACTOME  
ONSTITUTIVELY\_ACTIVE\_EGFR;REACTOME\_SIGNALING\_BY\_EGFR\_IN\_CANCER;REACTOME

RS;REACTOME\_G\_ALPHA\_Q\_SIGNALLING\_EVENTS;REACTOME\_GPCR\_DOWNSTREAM\_SIGI

\_A\_LYMPHOID\_AND\_A\_NON\_LYMPHOID\_CELL;REACTOME\_INTERFERON\_GAMMA\_SIGNALING

IF\_SMALL\_MOLECULES;REACTOME\_SLC\_MEDIATED\_TRANSMEMBRANE\_TRANSPORT;REAC

NG;REACTOME\_ADENYLATE\_CYCLASE\_INHIBITORY\_PATHWAY;REACTOME\_NEUROTRANSM

'LEX;REACTOME\_PYRUVATE\_METABOLISM

OLIGOPEPTIDES

\_TAGE\_GATED\_POTASSIUM\_CHANNELS;REACTOME\_POTASSIUM\_CHANNELS

S

ANCE;REACTOME\_NCAM1\_INTERACTIONS;REACTOME\_REGULATION\_OF\_INSULIN\_SECRET

IN\_SIGNALING\_AND\_AGGREGATION

NSTITUTIVELY\_ACTIVE\_EGFR;REACTOME\_GRB2\_EVENTS\_IN\_ERBB2\_SIGNALING;REACTOM  
ADING\_TO\_GENERATION\_OF\_SECOND\_MESSENGERS;REACTOME\_SIGNALING\_BY\_THE\_B\_C



CELL;REACTOME\_ACETYLCHOLINE\_BINDING\_AND\_DOWNSTREAM\_EVENTS;REACTOME\_HI

'LEX;REACTOME\_PYRUVATE\_METABOLISM

C\_REGULATION;REACTOME\_G\_ALPHA\_Q\_SIGNALLING\_EVENTS;REACTOME\_CLASS\_B\_2\_SE  
OME\_INTEGRATION\_OF\_ENERGY\_METABOLISM;REACTOME\_METABOLISM\_OF\_LIPIDS\_AND

RNA;REACTOME\_METABOLISM\_OF\_RNA;REACTOME\_REGULATION\_OF\_MRNA\_STABILITY\_B  
JR

D\_ANKYRINS  
RNA;REACTOME\_MRNA\_DECAY\_BY\_3\_TO\_5\_EXORIBONUCLEASE;REACTOME\_DEADENYLAT

DSPHOLIPID\_BIOSYNTHESIS;REACTOME\_METABOLISM\_OF\_LIPIDS\_AND\_LIPOPROTEINS

MA\_MEMBRANE;REACTOME\_SIGNALING\_BY\_FGFR\_IN\_DISEASE;REACTOME\_RESPONSE\_TO

TS;REACTOME\_M\_G1\_TRANSITION;REACTOME\_G1\_S\_TRANSITION;REACTOME\_SYNTHESIS

P75\_NTR\_RECEPTOR\_MEDIATED\_SIGNALLING;REACTOME\_SIGNALING\_BY\_GPCR;REACTOM

.SOME\_DEGRADATION

TERFERON\_SIGNALING;REACTOME\_IMMUNE\_SYSTEM;REACTOME\_ADAPTIVE\_IMMUNE\_SYS

P75\_NTR\_RECEPTOR\_MEDIATED\_SIGNALLING;REACTOME\_SIGNALING\_BY\_GPCR;REACTOM

P75\_NTR\_RECEPTOR\_MEDIATED\_SIGNALLING;REACTOME\_SIGNALING\_BY\_GPCR;REACTOM

ME\_RNA\_POL\_I\_TRANSCRIPTION\_INITIATION

OME\_TRANSPORT\_OF\_INORGANIC\_CATIONS\_ANIONS\_AND\_AMINO\_ACIDS\_OLIGOPEPTIDES  
OME\_TRANSPORT\_OF\_INORGANIC\_CATIONS\_ANIONS\_AND\_AMINO\_ACIDS\_OLIGOPEPTIDES

OLIGOPEPTIDES

ME\_RNA\_POL\_I\_TRANSCRIPTION\_INITIATION

\_TRANSCRIPTION

OLL\_RECEPTOR\_CASCADES

\_SINGLE\_NUCLEOTIDE\_REPLACEMENT\_PATHWAY;REACTOME\_DNA\_REPAIR;REACTOME\_R  
\_SINGLE\_NUCLEOTIDE\_REPLACEMENT\_PATHWAY;REACTOME\_DNA\_REPAIR;REACTOME\_R

REPAIR;REACTOME\_CHROMOSOME\_MAINTENANCE;REACTOME\_ACTIVATION\_OF\_ATR\_IN\_R  
\_SIGNALING;REACTOME\_G\_ALPHA\_I\_SIGNALLING\_EVENTS;REACTOME\_SIGNAL\_AMPLIFICA

3OLISM;REACTOME\_TRANSMEMBRANE\_TRANSPORT\_OF\_SMALL\_MOLECULES;REACTOME\_

EXCISION\_REPAIR;REACTOME\_REPAIR\_SYNTHESIS\_FOR\_GAP\_FILLING\_BY\_DNA\_POL\_IN\_TC

OLIGOPEPTIDES

PRESSION;REACTOME\_CIRCADIAN\_REPRESSION\_OF\_EXPRESSION\_BY\_REV\_ERBA;REACTC

TEM;REACTOME\_CYTOKINE\_SIGNALING\_IN\_IMMUNE\_SYSTEM

\_TC\_NER;REACTOME\_RNA\_POL\_II\_TRANSCRIPTION\_PRE\_INITIATION\_AND\_PROMOTER\_OF

TABOLISM;REACTOME\_CHONDROITIN\_SULFATE\_DERMATAN\_SULFATE\_METABOLISM;REAC  
TABOLISM;REACTOME\_CHONDROITIN\_SULFATE\_DERMATAN\_SULFATE\_METABOLISM;REAC  
:ACTOME\_ALPHA\_LINOLENIC\_ACID\_ALA\_METABOLISM;REACTOME\_PEROXISOMAL\_LIPID\_M

MOSOME\_MAINTENANCE;REACTOME\_DEPOSITION\_OF\_NEW\_CENPA\_CONTAINING\_NUCLE

TIONALIZATION\_OF\_COMPOUNDS;REACTOME\_ENDOGENOUS\_STEROLS;REACTOME\_STERI

ADAPTIVE\_IMMUNE\_SYSTEM

\_ERBB4\_SIGNALING;REACTOME\_SHC1\_EVENTS\_IN\_ERBB4\_SIGNALING;REACTOME\_PI3K\_E'  
\_OF\_HOMO\_SAPIENS\_WITH\_MYCOBACTERIUM\_TUBERCULOSIS;REACTOME\_TRANSMEMBR

;REACTOME\_INTERFERON\_ALPHA\_BETA\_SIGNALING;REACTOME\_REGULATION\_OF\_IFNA\_S

ME\_SIGNALLING\_TO\_ERKS;REACTOME\_SIGNALING\_BY\_PDGF;REACTOME\_DOWNSTREAM\_

ME\_APOPTOSIS  
ME\_APOPTOSIS

ME\_IMMUNE\_SYSTEM;REACTOME\_ADAPTIVE\_IMMUNE\_SYSTEM

N

ATION



ME\_SIGNAL\_TRANSDUCTION\_BY\_L1;REACTOME\_INTERFERON\_GAMMA\_SIGNALING;REACTC

TIONALIZATION\_OF\_COMPOUNDS;REACTOME\_STEROID\_HORMONES;REACTOME\_METABOI  
TIONALIZATION\_OF\_COMPOUNDS;REACTOME\_STEROID\_HORMONES;REACTOME\_METABOI

BODY\_METABOLISM;REACTOME\_TRANSCRIPTIONAL\_REGULATION\_OF\_WHITE\_ADIPOCYTE\_  
OF\_PG;REACTOME\_ACYL\_CHAIN\_REMODELLING\_OF\_PE;REACTOME\_ACYL\_CHAIN\_REMODE

TOME\_S\_PHASE  
TOME\_S\_PHASE

\_STEROID\_HORMONES;REACTOME\_METABOLISM\_OF\_LIPIDS\_AND\_LIPOPROTEINS;REACTC

.SOME\_DEGRADATION

)\_ANKYRINS

LEX\_AND\_EIFS\_AND\_SUBSEQUENT\_BINDING\_TO\_43S;REACTOME\_METABOLISM\_OF\_PROTI

ING\_BY\_ERBB2;REACTOME\_GRB2\_EVENTS\_IN\_ERBB2\_SIGNALING;REACTOME\_SIGNALING\_

CELL;REACTOME\_ACETYLCHOLINE\_BINDING\_AND\_DOWNSTREAM\_EVENTS;REACTOME\_HI

LEAR\_EVENTS\_KINASE\_AND\_TRANSCRIPTION\_FACTOR\_ACTIVATION;REACTOME\_ERK\_MAF

\DE

\_TRANSCRIPTION;REACTOME\_RNA\_POL\_III\_TRANSCRIPTION\_INITIATION\_FROM\_TYPE\_3\_F

CTOME\_FATTY\_ACID\_TRIACYLGLYCEROL\_AND\_KETONE\_BODY\_METABOLISM;REACTOME\_

E\_FATTY\_ACID\_TRIACYLGLYCEROL\_AND\_KETONE\_BODY\_METABOLISM

PRESSION;REACTOME\_YAP1\_AND\_WWTR1\_TAZ\_STIMULATED\_GENE\_EXPRESSION;REACTO

OLIGOPEPTIDES

USE\_OF\_HIV\_LIFE\_CYCLE

3ODY\_METABOLISM;REACTOME\_TRANSCRIPTIONAL\_REGULATION\_OF\_WHITE\_ADIPOCYTE\_

N  
N  
N  
N

THWAY;REACTOME\_SIGNALING\_BY\_TGF\_BETA\_RECEPTOR\_COMPLEX

MEMBRANE\_TRANSPORT;REACTOME\_TRANSPORT\_OF\_INORGANIC\_CATIONS\_ANIONS\_AND\_

3NALING

CELL;REACTOME\_ACTIVATION\_OF\_KAINATE\_RECEPTORS\_UPON\_Glutamate\_BINDING;RE  
CELL;REACTOME\_ACTIVATION\_OF\_KAINATE\_RECEPTORS\_UPON\_Glutamate\_BINDING;RE

EMOSTASIS  
EMOSTASIS

E\_INTEGRATION\_OF\_ENERGY\_METABOLISM;REACTOME\_OPIOID\_SIGNALLING;REACTOME\_I

ACTOME\_THE\_ROLE\_OF\_NEF\_IN\_HIV1\_REPLICATION\_AND\_DISEASE\_PATHOGENESIS;REAC  
PRESSION;REACTOME\_YAP1\_AND\_WWTR1\_TAZ\_STIMULATED\_GENE\_EXPRESSION;REACTO  
PRESSION;REACTOME\_YAP1\_AND\_WWTR1\_TAZ\_STIMULATED\_GENE\_EXPRESSION;REACTO

D\_TRANSLATION;REACTOME\_RORA\_ACTIVATES\_CIRCADIAN\_EXPRESSION;REACTOME\_PRE

\_ACTIVATION\_IN\_TLR7\_8\_OR\_9\_SIGNALING;REACTOME\_INNATE\_IMMUNE\_SYSTEM;REACTO

\_ACTIVATION\_IN\_TLR7\_8\_OR\_9\_SIGNALING;REACTOME\_INNATE\_IMMUNE\_SYSTEM;REACTO  
TRANSMITTER\_RELEASE\_CYCLE;REACTOME\_NOREPINEPHRINE\_NEUROTRANSMITTER\_RE

\_COUPLING\_AND\_HEAT\_PRODUCTION\_BY\_UNCOUPLING\_PROTEINS\_

\_FATTY\_ACID\_TRIACYLGLYCEROL\_AND\_KETONE\_BODY\_METABOLISM;REACTOME\_TRANS

\_VIA\_NRAGE\_NRIF\_AND\_NADE;REACTOME\_P75\_NTR\_RECEPTOR\_MEDIATED\_SIGNALLING;R

;REACTOME\_IMMUNE\_SYSTEM;REACTOME\_ADAPTIVE\_IMMUNE\_SYSTEM

;CYCLE\_MITOTIC;REACTOME\_CELL\_CYCLE\_CHECKPOINTS;REACTOME\_REGULATION\_OF\_MI

.SOME\_DEGRADATION

IRS;REACTOME\_G\_ALPHA\_Q\_SIGNALLING\_EVENTS;REACTOME\_GPCR\_DOWNSTREAM\_SIGI  
ORGANIC\_ACIDS\_METAL\_IONS\_AND\_AMINE\_COMPOUNDS;REACTOME\_METAL\_ION\_SLC\_TR  
ORGANIC\_ACIDS\_METAL\_IONS\_AND\_AMINE\_COMPOUNDS;REACTOME\_METAL\_ION\_SLC\_TR

OME\_TRANSPORT\_OF\_INORGANIC\_CATIONS\_ANIONS\_AND\_AMINO\_ACIDS\_OLIGOPEPTIDES

3\_IN\_ERBB4\_SIGNALING;REACTOME\_PI3K\_EVENTS\_IN\_ERBB2\_SIGNALING;REACTOME\_DOV

\_SINGLE\_NUCLEOTIDE\_REPLACEMENT\_PATHWAY;REACTOME\_DNA\_REPAIR;REACTOME\_R



:\_G\_ALPHA\_Z\_SIGNALLING\_EVENTS;REACTOME\_EFFECTS\_OF\_PIP2\_HYDROLYSIS;REACTOI

A\_24\_HYDROXYCHOLESTEROL;REACTOME\_SYNTHESIS\_OF\_BILE\_ACIDS\_AND\_BILE\_SALTS

TOME\_RECRUITMENT\_OF\_NUMA\_TO\_MITOTIC\_CENTROSOMES;REACTOME\_MITOTIC\_G2\_G

PRESSION;REACTOME\_YAP1\_AND\_WWTR1\_TAZ\_STIMULATED\_GENE\_EXPRESSION;REACTO

IGNALING;REACTOME\_RIG\_I\_MDA5\_MEDIATED\_INDUCTION\_OF\_IFN\_ALPHA\_BETA\_PATHWA  
.SOME\_DEGRADATION

\_BETA\_RECEPTOR\_COMPLEX;REACTOME\_PLATELET\_ACTIVATION\_SIGNALING\_AND\_AGGR

ORGANIC\_ACIDS\_METAL\_IONS\_AND\_AMINE\_COMPOUNDS;REACTOME\_FACILITATIVE\_NA\_IN

S\_IN\_ERBB4\_SIGNALING;REACTOME\_PI3K\_EVENTS\_IN\_ERBB2\_SIGNALING;REACTOME\_DOV

.SOME\_DEGRADATION

.SOME\_DEGRADATION

1;REACTOME\_GLYCOSAMINOGLYCAN\_METABOLISM;REACTOME\_A\_TETRASACCHARIDE\_LIN

1;REACTOME\_GLYCOSAMINOGLYCAN\_METABOLISM;REACTOME\_A\_TETRASACCHARIDE\_LIN

UENT\_MODIFICATION

TRIN\_CREB\_SIGNALLING\_PATHWAY\_VIA\_PKC\_AND\_MAPK;REACTOME\_NUCLEAR\_EVENTS\_

ILES;REACTOME\_SLC\_MEDIATED\_TRANSMEMBRANE\_TRANSPORT;REACTOME\_TRANSPOR  
ILES;REACTOME\_SLC\_MEDIATED\_TRANSMEMBRANE\_TRANSPORT;REACTOME\_TRANSPOR

TERS;REACTOME\_CELL\_SURFACE\_INTERACTIONS\_AT\_THE\_VASCULAR\_WALL;REACTOME\_

:\_FATTY\_ACID\_TRIACYLGLYCEROL\_AND\_KETONE\_BODY\_METABOLISM;REACTOME\_TRANS

ATION\_OF\_AMPK\_ACTIVITY\_VIA\_LKB1;REACTOME\_ENERGY\_DEPENDENT\_REGULATION\_OF  
NG;REACTOME\_REGULATION\_OF\_IFNG\_SIGNALING;REACTOME\_INTERFERON\_GAMMA\_SIG

:ACTOME\_GPCR\_DOWNSTREAM\_SIGNALING;REACTOME\_G\_ALPHA\_I\_SIGNALLING\_EVENTS

CR\_DOWNSTREAM\_SIGNALING;REACTOME\_SEMA4D\_IN\_SEMAPHORIN\_SIGNALING;REACTC

ACTOME\_GENERIC\_TRANSCRIPTION\_PATHWAY;REACTOME\_NOTCH\_HLH\_TRANSCRIPTION\_  
ACTOME\_GENERIC\_TRANSCRIPTION\_PATHWAY;REACTOME\_NOTCH\_HLH\_TRANSCRIPTION\_

\_TRANSCRIPTION;REACTOME\_RNA\_POL\_III\_TRANSCRIPTION\_INITIATION\_FROM\_TYPE\_3\_F

.SOME\_DEGRADATION

IA\_NRAGE\_NRIF\_AND\_NADE;REACTOME\_P75\_NTR\_RECEPTOR\_MEDIATED\_SIGNALLING;RE/

PE\_3\_PROMOTER

G\_AND\_AGGREGATION

RT\_OF\_MATURE\_TRANSCRIPT\_TO\_CYTOPLASM;REACTOME\_TRANSMEMBRANE\_TRANSPOF

REPULSION;REACTOME\_SEMAPHORIN\_INTERACTIONS;REACTOME\_SEMA3A\_PLEXIN\_REPUI

ALING\_AND\_AGGREGATION

P75\_NTR\_RECEPTOR\_MEDIATED\_SIGNALLING;REACTOME\_SIGNALING\_BY\_GPCR;REACTOM

ACTOME\_SIGNALING\_BY\_ERBB2;REACTOME\_SIGNALING\_BY\_EGFR\_IN\_CANCER;REACTOME

OLISM\_OF\_LIPIDS\_AND\_LIPOPROTEINS

ERBB4;REACTOME\_ACTIVATED\_NOTCH1\_TRANSMITS\_SIGNAL\_TO\_THE\_NUCLEUS;REACTO

CRETION;REACTOME\_VOLTAGE\_GATED\_POTASSIUM\_CHANNELS;REACTOME\_POTASSIUM

PRESSION;REACTOME\_YAP1\_AND\_WWTR1\_TAZ\_STIMULATED\_GENE\_EXPRESSION;REACTO

OLIGOPEPTIDES;REACTOME\_PLATELET\_HOMEOSTASIS;REACTOME\_PLATELET\_CALCIIUM\_H

ACTOME\_INTERACTION\_BETWEEN\_L1\_AND\_ANKYRINS;REACTOME\_NEPHRIN\_INTERACTIO

ACTOME\_INTERACTION\_BETWEEN\_L1\_AND\_ANKYRINS;REACTOME\_NEPHRIN\_INTERACTIO

REACTOME\_MYD88\_MAL\_CASCADE\_INITIATED\_ON\_PLASMA\_MEMBRANE;REACTOME\_INNA

ACTOME\_METABOLISM\_OF\_PROTEINS;REACTOME\_POST\_TRANSLATIONAL\_PROTEIN\_MODIFI

ACTOME\_CELL\_SURFACE\_INTERACTIONS\_AT\_THE\_VASCULAR\_WALL;REACTOME\_COMMON

ETION\_AND\_INACTIVATION;REACTOME\_SYNTHESIS\_SECRETION\_AND\_INACTIVATION\_OF\_G  
ETION\_AND\_INACTIVATION;REACTOME\_SYNTHESIS\_SECRETION\_AND\_INACTIVATION\_OF\_G

OME\_SYNTHESIS\_OF\_BILE\_ACIDS\_AND\_BILE\_SALTS;REACTOME\_METABOLISM\_OF\_LIPIDS,



LOSS\_OF\_NLP\_FROM\_MITOTIC\_CENTROSOMES;REACTOME\_MITOTIC\_G2\_G2\_M\_PHASES;F  
BY\_GLUCAGON\_LIKE\_PEPTIDE1;REACTOME\_REGULATION\_OF\_INSULIN\_SECRETION;REAC  
CELL;REACTOME\_ACETYLCHOLINE\_BINDING\_AND\_DOWNSTREAM\_EVENTS;REACTOME\_HI  
YCLASE;REACTOME\_PLATELET\_HOMEOSTASIS;REACTOME\_HEMOSTASIS

ACTOME\_INTEGRIN\_CELL\_SURFACE\_INTERACTIONS;REACTOME\_AXON\_GUIDANCE;REACT  
M1\_INTERACTIONS;REACTOME\_NCAM\_SIGNALING\_FOR\_NEURITE\_OUT\_GROWTH  
ACTOME\_SIGNALING\_BY\_FGFR1\_MUTANTS;REACTOME\_SIGNALING\_BY\_FGFR1\_FUSION\_MUT

TRANSPORT;REACTOME\_TRANSPORT\_OF\_GLUCOSE\_AND\_OTHER\_SUGARS\_BILE\_SALTS\_

MEMBRANE;REACTOME\_PI3K\_AKT\_ACTIVATION;REACTOME\_SIGNALING\_BY\_INSULIN\_RECEP  
ORS;REACTOME\_G\_ALPHA\_Q\_SIGNALLING\_EVENTS;REACTOME\_GPCR\_DOWNSTREAM\_SIGI

ES;REACTOME\_SLC\_MEDIATED\_TRANSMEMBRANE\_TRANSPORT;REACTOME\_TRANSPORT\_

ERBB2\_SIGNALING;REACTOME\_SIGNALING\_BY\_EGFR\_IN\_CANCER;REACTOME\_SHC1\_EVEN

OLIGOPEPTIDES

SIGNALING\_ACTIVATES\_SMADS;REACTOME\_SIGNALING\_BY\_TGF\_BETA\_RECEPTOR\_COMPLE>

\_GPCR\_DOWNSTREAM\_SIGNALING;REACTOME\_G\_ALPHA\_I\_SIGNALLING\_EVENTS;REACTOI

LISM\_OF\_PORPHYRINS

REPULSION;REACTOME\_SEMAPHORIN\_INTERACTIONS;REACTOME\_SEMA3A\_PLEXIN\_REPUI

REPAIR;REACTOME\_CHROMOSOME\_MAINTENANCE;REACTOME\_ACTIVATION\_OF\_ATR\_IN\_F

PATHWAY;REACTOME\_SIGNALING\_BY\_TGF\_BETA\_RECEPTOR\_COMPLEX

JM\_CHANNELS

\_SIGNALLING\_EVENTS;REACTOME\_GPCR\_LIGAND\_BINDING

N

STEM;REACTOME\_ADAPTIVE\_IMMUNE\_SYSTEM;REACTOME\_CLASS\_I\_MHC\_MEDIATED\_ANT  
STEM;REACTOME\_ADAPTIVE\_IMMUNE\_SYSTEM;REACTOME\_CLASS\_I\_MHC\_MEDIATED\_ANT

CELL;REACTOME\_TRANSMEMBRANE\_TRANSPORT\_OF\_SMALL\_MOLECULES;REACTOME\_G/

OLIGOPEPTIDES

OLIGOPEPTIDES  
TOME\_MITOTIC\_G2\_G2\_M\_PHASES

OLIGOPEPTIDES

SIGNALS\_DEATH\_THROUGH\_JNK;REACTOME\_CELL\_DEATH\_SIGNALLING\_VIA\_NRAGE\_NRIF  
SIGNALS\_DEATH\_THROUGH\_JNK;REACTOME\_CELL\_DEATH\_SIGNALLING\_VIA\_NRAGE\_NRIF

RGY\_DEPENDENT\_REGULATION\_OF\_MTOR\_BY\_LKB1\_AMPK;REACTOME\_REGULATION\_OF\_

TEROL\_BIOSYNTHESIS

UES\_AT\_THE\_CENTROMERE;REACTOME\_DNA\_REPLICATION;REACTOME\_MITOTIC\_PROMET

REACTOME\_SIGNALING\_BY\_CONSTITUTIVELY\_ACTIVE\_EGFR;REACTOME\_SIGNALING\_BY\_E

}\_METABOLISM;REACTOME\_GLYCOSAMINOGLYCAN\_METABOLISM;REACTOME\_A\_TETRASA

ACTIVATION\_OF\_ARYLSULFATASES;REACTOME\_METABOLISM\_OF\_PROTEINS;REACTOME\_S

'HASES;REACTOME\_ACTIVATION\_OF\_ATR\_IN\_RESPONSE\_TO\_REPLICATION\_STRESS;REAC  
'HASES;REACTOME\_ACTIVATION\_OF\_ATR\_IN\_RESPONSE\_TO\_REPLICATION\_STRESS;REAC

ACTOME\_FRS2\_MEDIATED\_CASCADE;REACTOME\_PI\_3K\_CASCADE;REACTOME\_DOWNSTREA  
ACTOME\_FRS2\_MEDIATED\_CASCADE;REACTOME\_PI\_3K\_CASCADE;REACTOME\_DOWNSTREA  
ACTOME\_FRS2\_MEDIATED\_CASCADE;REACTOME\_PI\_3K\_CASCADE;REACTOME\_DOWNSTREA

\_3\_UTR\_MEDIATED\_TRANSLATIONAL\_REGULATION;REACTOME\_METABOLISM\_OF\_MRNA;RI

UENT\_MODIFICATION;REACTOME\_N\_GLYCAN\_ANTENNAE\_ELONGATION;REACTOME\_N\_GL  
LYCOSYLATION;REACTOME\_BIOSYNTHESIS\_OF\_THE\_N\_GLYCAN\_PRECURSOR\_DOLICHOL

ADING\_TO\_GENERATION\_OF\_SECOND\_MESSENGERS;REACTOME\_SIGNALING\_BY\_THE\_B\_C

\_3\_UTR\_MEDIATED\_TRANSLATIONAL\_REGULATION;REACTOME\_METABOLISM\_OF\_MRNA;RI

S



.SOME\_DEGRADATION

OHYDRATES  
NALING;REACTOME\_DOWNSTREAM\_TCR\_SIGNALING;REACTOME\_IMMUNE\_SYSTEM;REACT

:\_EFFECTS\_OF\_PIP2\_HYDROLYSIS;REACTOME\_HEMOSTASIS;REACTOME\_PLATELET\_ACTIV

ME\_JNK\_C\_JUN\_KINASES\_PHOSPHORYLATION\_AND\_ACTIVATION\_MEDIATED\_BY\_ACTIVATI

ME\_CITRIC\_ACID\_CYCLE\_TCA\_CYCLE  
;MA\_MEMBRANE;REACTOME\_SIGNALING\_BY\_FGFR\_IN\_DISEASE;REACTOME\_TRANSMISSIO

ME\_PLATELET\_ADHESION\_TO\_EXPOSED\_COLLAGEN;REACTOME\_INTEGRIN\_CELL\_SURFAC  
.SOME\_DEGRADATION

N

E\_PATHWAY;REACTOME\_CELL\_CYCLE;REACTOME\_ORC1\_REMOVAL\_FROM\_CHROMATIN;RI  
PLICATIVE\_COMPLEX;REACTOME\_E2F\_ENABLED\_INHIBITION\_OF\_PRE\_REPLICATION\_COMP

:\_EFFECTS\_OF\_PIP2\_HYDROLYSIS;REACTOME\_HEMOSTASIS;REACTOME\_PLATELET\_ACTIV  
:\_EFFECTS\_OF\_PIP2\_HYDROLYSIS;REACTOME\_HEMOSTASIS;REACTOME\_PLATELET\_ACTIV  
:ACTOME\_IRON\_UPTAKE\_AND\_TRANSPORT;REACTOME\_TRANSFERRIN\_ENDOCYTOSIS\_AN

CTIVATION\_AND\_REGULATION;REACTOME\_NITRIC\_OXIDE\_STIMULATES\_GUANYLATE\_CYCI  
G;REACTOME\_SEMAPHORIN\_INTERACTIONS;REACTOME\_FACTORS\_INVOLVED\_IN\_MEGAKA  
ATION\_OF\_AMPK\_ACTIVITY\_VIA\_LKB1;REACTOME\_ENERGY\_DEPENDENT\_REGULATION\_OF  
ATION\_OF\_AMPK\_ACTIVITY\_VIA\_LKB1;REACTOME\_ENERGY\_DEPENDENT\_REGULATION\_OF

.SOME\_DEGRADATION

/E\_SIGNALING\_BY\_FGFR1\_MUTANTS;REACTOME\_SIGNALING\_BY\_ACTIVATED\_POINT\_MUTA  
/E\_SIGNALING\_BY\_FGFR1\_MUTANTS;REACTOME\_SIGNALING\_BY\_ACTIVATED\_POINT\_MUTA

\_SINGLE\_NUCLEOTIDE\_REPLACEMENT\_PATHWAY;REACTOME\_DNA\_REPAIR;REACTOME\_R

SENSITIVE\_LIPASE\_HSL\_MEDIATED\_TRIACYLGLYCEROL\_HYDROLYSIS;REACTOME\_LIPID\_DK

ORGANIZATION;REACTOME\_APOPTOSIS;REACTOME\_APOPTOTIC\_EXECUTION\_PHASE

REACTOME\_TRANSMEMBRANE\_TRANSPORT\_OF\_SMALL\_MOLECULES;REACTOME\_SLC\_MEI

OLIGOPEPTIDES

COUPLING\_AND\_HEAT\_PRODUCTION\_BY\_UNCOUPLING\_PROTEINS\_

SIGNALLING\_TO\_ERKS;REACTOME\_SIGNALING\_BY\_INSULIN\_RECEPTOR;REACTOME\_SIGNA

REACTOME\_MITOTIC\_G2\_G2\_M\_PHASES

S\_IN\_ERBB4\_SIGNALING;REACTOME\_PI3K\_EVENTS\_IN\_ERBB2\_SIGNALING;REACTOME\_DOPAMINE\_NEUROTRANSMISSION

.SOME\_DEGRADATION

REACTOME\_INTEGRATION\_OF\_ENERGY\_METABOLISM;REACTOME\_DOPAMINE\_NEUROTRANSMISSION

PROTEINS;REACTOME\_AXON\_GUIDANCE;REACTOME\_NCAM\_SIGNALING\_FOR\_NEURITE\_OUTGROWTH;  
PROTEINS;REACTOME\_AXON\_GUIDANCE;REACTOME\_NCAM\_SIGNALING\_FOR\_NEURITE\_OUTGROWTH;  
PROTEINS;REACTOME\_AXON\_GUIDANCE;REACTOME\_NCAM\_SIGNALING\_FOR\_NEURITE\_OUTGROWTH;  
PROTEINS;REACTOME\_AXON\_GUIDANCE;REACTOME\_NCAM\_SIGNALING\_FOR\_NEURITE\_OUTGROWTH;

GLYCOSYLATION;REACTOME\_BIOSYNTHESIS\_OF\_THE\_N\_GLYCAN\_PRECURSOR\_DOLICHOL

ME\_SIGNALING\_TO\_ERKS;REACTOME\_SIGNALING\_BY\_PDGF;REACTOME\_DOWNSTREAM\_SIGNALING

\_TRANSCRIPTION

MEMBRANE\_INTERACTIONS;REACTOME\_NCAM\_SIGNALING\_FOR\_NEURITE\_OUTGROWTH;  
MEMBRANE\_INTERACTIONS;REACTOME\_NCAM\_SIGNALING\_FOR\_NEURITE\_OUTGROWTH;  
MEMBRANE\_INTERACTIONS;REACTOME\_NCAM\_SIGNALING\_FOR\_NEURITE\_OUTGROWTH

GLYCAN\_PATHWAYS;REACTOME\_APOPTOSIS;REACTOME\_INNATE\_IMMUNE\_SYSTEM;REACTOME\_N\_GLYCAN\_TRIMMING\_IN\_THE\_ER\_AND\_CALNEXIN\_CALRETICULIN\_CYCLE;  
PEPTIDES

PROTEINS;REACTOME\_LIPID\_DIGESTION\_MOBILIZATION\_AND\_TRANSPORT;REACTOME\_LIPOPROTEINS;REACTOME\_LIPID\_DIGESTION\_MOBILIZATION\_AND\_TRANSPORT;REACTOME\_LIPOPROTEINS

;REACTOME\_INTEGRIN\_ALPHAIIIB\_BETA3\_SIGNALING;REACTOME\_PLATELET\_AGGREGATION

SYSTEM;REACTOME\_NEUROTRANSMITTER\_RELEASE\_CYCLE;REACTOME\_ACETYLCHOLINE



\_REGULATION\_OF\_SIGNALING\_BY\_CBL;REACTOME\_IL\_3\_5\_AND\_GM-CSF\_SIGNALING;REA

≡\_DEVELOPMENT\_AND\_PLATELET\_PRODUCTION;REACTOME\_HEMOSTASIS  
≡\_DEVELOPMENT\_AND\_PLATELET\_PRODUCTION;REACTOME\_HEMOSTASIS

E\_PATHWAY;REACTOME\_CELL\_CYCLE;REACTOME\_ORC1\_REMOVAL\_FROM\_CHROMATIN;RI

ACTOME\_SIGNALING\_BY\_EGFR\_IN\_CANCER;REACTOME\_NGF\_SIGNALLING\_VIA\_TRKA\_FROI

N  
N  
N  
N  
N

SSION\_OF\_EXPRESSION\_BY\_REV\_ERBA;REACTOME\_METABOLISM\_OF\_LIPIDS\_AND\_LIPOI

;REACTOME\_NITRIC\_OXIDE\_STIMULATES\_GUANYLATE\_CYCLASE;REACTOME\_PLATELET\_H  
TIONALIZATION\_OF\_COMPOUNDS;REACTOME\_STEROID\_HORMONES;REACTOME\_METABO

EACTOME\_PEPTIDE\_LIGAND\_BINDING\_RECEPTORS;REACTOME\_CLASS\_A1\_RHODOPSIN\_LI

ORGANIC\_ACIDS\_METAL\_IONS\_AND\_AMINE\_COMPOUNDS;REACTOME\_NA\_CL\_DEPENDENT

BY\_METABOLISM;REACTOME\_SYNTHESIS\_OF\_VERY\_LONG\_CHAIN\_FATTY\_ACYL\_COAS

TOME\_MITOTIC\_M\_M\_G1\_PHASES;REACTOME\_MITOTIC\_G2\_G2\_M\_PHASES;REACTOME\_DN

AND\_KETONE\_BODY\_METABOLISM

RE\_MRNA\_DERIVED\_FROM\_AN\_INTRONLESS\_TRANSCRIPT

3\_IN\_ERBB4\_SIGNALING;REACTOME\_PI3K\_EVENTS\_IN\_ERBB2\_SIGNALING;REACTOME\_DOV

TRANSITION;REACTOME\_G1\_S\_TRANSITION;REACTOME\_POL\_SWITCHING;REACTOME\_SYNTI

OME\_IMMUNE\_SYSTEM;REACTOME\_ADAPTIVE\_IMMUNE\_SYSTEM

TOME\_DARPP\_32\_EVENTS;REACTOME\_METABOLISM\_OF\_LIPIDS\_AND\_LIPOPTEINS;REAC  
)\_COUPLING\_AND\_HEAT\_PRODUCTION\_BY\_UNCOUPLING\_PROTEINS\_  
:ACTOME\_IRON\_UPTAKE\_AND\_TRANSPORT;REACTOME\_TRANSFERRIN\_ENDOCYTOSIS\_AN

S;REACTOME\_TRANSPORT\_OF\_ORGANIC\_ANIONS

IC\_MEDIATED\_ANTIGEN\_PROCESSING\_PRESENTATION;REACTOME\_ANTIGEN\_PROCESSING  
);GLYCEROL\_AND\_KETONE\_BODY\_METABOLISM  
\_REPLICATION\_INDEPENDENT\_DOUBLE\_STRAND\_BREAKS;REACTOME\_P53\_DEPENDENT\_C

IA\_NRAGE\_NRIF\_AND\_NADE;REACTOME\_P75\_NTR\_RECEPTOR\_MEDIATED\_SIGNALLING;RE/

IA\_NRAGE\_NRIF\_AND\_NADE;REACTOME\_P75\_NTR\_RECEPTOR\_MEDIATED\_SIGNALLING;RE/

AM\_TCR\_SIGNALING;REACTOME\_PHOSPHORYLATION\_OF\_CD3\_AND\_TCR\_ZETA\_CHAINS;RI

:TABOLISM\_OF\_LIPIDS\_AND\_LIPOPROTEINS

:TABOLISM\_OF\_LIPIDS\_AND\_LIPOPROTEINS

MEMBRANE\_TRANSPORT;REACTOME\_METABOLISM\_OF\_LIPIDS\_AND\_LIPOPROTEINS;REAC

N

N

;MA\_MEMBRANE;REACTOME\_SIGNALING\_BY\_FGFR\_IN\_DISEASE;REACTOME\_TRANSMISSIO

'E\_IMMUNE\_SYSTEM

ME\_FORMATION\_OF\_TUBULIN\_FOLDING\_INTERMEDIATES\_BY\_CCT\_TRIC;REACTOME\_MET/

\_SINGLE\_NUCLEOTIDE\_REPLACEMENT\_PATHWAY;REACTOME\_DNA\_REPAIR;REACTOME\_R

BODY\_METABOLISM;REACTOME\_TRANSCRIPTIONAL\_REGULATION\_OF\_WHITE\_ADIPOCYTE\_  
OSTASIS

LNEXIN\_CALRETICULIN\_CYCLE

\_SYSTEM

EXCISION\_REPAIR;REACTOME\_REPAIR\_SYNTHESIS\_FOR\_GAP\_FILLING\_BY\_DNA\_POL\_IN\_TC

BY\_PDGF;REACTOME\_AXON\_GUIDANCE;REACTOME\_NCAM1\_INTERACTIONS;REACTOME\_NC

\_II\_PRE\_TRANSCRIPTION\_EVENTS;REACTOME\_HIV\_INFECTION;REACTOME\_HIV\_LIFE\_CYC  
IE\_TRANSPORT\_OF\_SMALL\_MOLECULES;REACTOME\_SLC\_MEDIATED\_TRANSMEMBRANE\_T

\_DOWNSTREAM\_SIGNALING;REACTOME\_G\_ALPHA\_S\_SIGNALLING\_EVENTS;REACTOME\_GF

TION;REACTOME\_NEPHRIN\_INTERACTIONS;REACTOME\_HEMOSTASIS;REACTOME\_PLATELE

:ACTOME\_GPCR\_DOWNSTREAM\_SIGNALING;REACTOME\_GPCR\_LIGAND\_BINDING

OME\_IMMUNE\_SYSTEM;REACTOME\_ADAPTIVE\_IMMUNE\_SYSTEM

CTOME\_SIGNALING\_BY\_ERBB4;REACTOME\_DOWNREGULATION\_OF\_ERBB2\_ERBB3\_SIGNAL

NOTCH3;REACTOME\_RECEPTOR\_LIGAND\_BINDING\_INITIATES\_THE\_SECOND\_PROTEOLYTI  
\_TRANSCRIPTION

.SOME\_DEGRADATION

.SOME\_DEGRADATION

CELL;REACTOME\_ACETYLCHOLINE\_BINDING\_AND\_DOWNSTREAM\_EVENTS;REACTOME\_HI

E\_INTEGRATION\_OF\_ENERGY\_METABOLISM;REACTOME\_OPIOID\_SIGNALLING;REACTOME\_I

)\_ANKYRINS

)\_ANKYRINS



CTOME\_OTHER\_SEMAPHORIN\_INTERACTIONS;REACTOME\_SEMAPHORIN\_INTERACTIONS;R

TIONALIZATION\_OF\_COMPOUNDS;REACTOME\_ENDOGENOUS\_STEROLS;REACTOME\_STER

P75\_NTR\_RECEPTOR\_MEDIATED\_SIGNALLING;REACTOME\_SIGNALING\_BY\_GPCR;REACTOM

ORGANIC\_ACIDS\_METAL\_IONS\_AND\_AMINE\_COMPOUNDS;REACTOME\_AMINE\_COMPOUND\_

\_SIGNALLING\_EVENTS;REACTOME\_GPCR\_LIGAND\_BINDING

\_3\_UTR\_MEDIATED\_TRANSLATIONAL\_REGULATION;REACTOME\_METABOLISM\_OF\_MRNA;RI

D\_TRANSLATION;REACTOME\_RORA\_ACTIVATES\_CIRCADIAN\_EXPRESSION;REACTOME\_YAF  
D\_TRANSLATION;REACTOME\_RORA\_ACTIVATES\_CIRCADIAN\_EXPRESSION;REACTOME\_YAF  
D\_TRANSLATION;REACTOME\_RORA\_ACTIVATES\_CIRCADIAN\_EXPRESSION;REACTOME\_YAF  
;MA\_MEMBRANE;REACTOME\_SIGNALING\_BY\_FGFR\_IN\_DISEASE;REACTOME\_TRANSMISSIO

IDE

ASIS;REACTOME\_PLATELET\_CALCIIUM\_HOMEOSTASIS;REACTOME\_IION\_TRANSPORT\_BY\_P\_

RT\_OF\_MATURE\_TRANSCRIPT\_TO\_CYTOPLASM;REACTOME\_TRANSMEMBRANE\_TRANSPOF

RT\_OF\_MATURE\_TRANSCRIPT\_TO\_CYTOPLASM;REACTOME\_TRANSMEMBRANE\_TRANSPOR

LIGOPEPTIDES

LIGOPEPTIDES

REACTOME\_DOWNSTREAM\_SIGNAL\_TRANSDUCTION;REACTOME\_PLATELET\_AGGREGATION

CASCADE;REACTOME\_HEMOSTASIS;REACTOME\_INNATE\_IMMUNE\_SYSTEM;REACTOME\_IMMUNE

ME\_RNA\_POL\_I\_TRANSCRIPTION\_INITIATION

CELL;REACTOME\_ACTIVATION\_OF\_NMDA\_RECEPTOR\_UPON\_Glutamate\_BINDING\_AND\_EFFECT

.SOME\_DEGRADATION

ORGANIC\_ACIDS\_METAL\_IONS\_AND\_AMINE\_COMPOUNDS;REACTOME\_BILE\_SALT\_AND\_OR  
ME\_MRNA\_CAPPING;REACTOME\_TRANSCRIPTION\_COUPLED\_NER\_TC\_NER;REACTOME\_RI  
CASCADE;REACTOME\_GPCR\_DOWNSTREAM\_SIGNALING;REACTOME\_G\_BETA\_GAMMA\_SIG

A\_ACTIVATES\_GENE\_EXPRESSION;REACTOME\_RORA\_ACTIVATES\_CIRCADIAN\_EXPRESSIO  
A\_ACTIVATES\_GENE\_EXPRESSION;REACTOME\_RORA\_ACTIVATES\_CIRCADIAN\_EXPRESSIO

\_OF\_NFKB\_AND\_MAP\_KINASES\_UPON\_TLR7\_8\_OR\_9\_ACTIVATION;REACTOME\_NFKB\_AND\_  
:MOSTASIS  
ORGANIC\_ACIDS\_METAL\_IONS\_AND\_AMINE\_COMPOUNDS;REACTOME\_BILE\_SALT\_AND\_OR  
ORGANIC\_ACIDS\_METAL\_IONS\_AND\_AMINE\_COMPOUNDS;REACTOME\_BILE\_SALT\_AND\_OR

ACTOME\_SIGNALING\_BY\_EGFR\_IN\_CANCER;REACTOME\_NGF\_SIGNALLING\_VIA\_TRKA\_FROI

\_NCAM\_SIGNALING\_FOR\_NEURITE\_OUT\_GROWTH  
\_3\_UTR\_MEDIATED\_TRANSLATIONAL\_REGULATION;REACTOME\_METABOLISM\_OF\_MRNA;RI

TS\_IN\_ERBB2\_SIGNALING;REACTOME\_AXON\_GUIDANCE;REACTOME\_SEMA4D\_IN\_SEMAPHC  
\_GPCR\_DOWNSTREAM\_SIGNALING;REACTOME\_G\_ALPHA\_I\_SIGNALLING\_EVENTS;REACTOI

ME\_SIGNALING\_BY\_FGFR\_IN\_DISEASE;REACTOME\_SIGNALING\_BY\_FGFR1\_MUTANTS;REAC  
ME\_SIGNALING\_BY\_FGFR\_IN\_DISEASE;REACTOME\_SIGNALING\_BY\_FGFR1\_MUTANTS;REAC  
ME\_SIGNALING\_BY\_FGFR\_IN\_DISEASE;REACTOME\_SIGNALING\_BY\_FGFR1\_MUTANTS;REAC

CELL;REACTOME\_TRAFFICKING\_OF\_AMPA\_RECEPTORS;REACTOME\_TRAFFICKING\_OF\_GLI  
.SOME\_DEGRADATION

ME\_PLATELET\_ADHESION\_TO\_EXPOSED\_COLLAGEN;REACTOME\_INTEGRIN\_CELL\_SURFAC

ATHWAYS;REACTOME\_SYNTHESIS\_SECRETION\_AND\_DEACYLATION\_OF\_GHRELIN;REACTOI

ACTED\_EVENTS;REACTOME\_SIGNALING\_BY\_INSULIN\_RECEPTOR;REACTOME\_MTORC1\_MED

OME\_INTEGRATION\_OF\_ENERGY\_METABOLISM;REACTOME\_METABOLISM\_OF\_LIPIDS\_AND\_  
OME\_INTEGRATION\_OF\_ENERGY\_METABOLISM;REACTOME\_METABOLISM\_OF\_LIPIDS\_AND\_

GLUCAGON\_TYPE\_LIGAND\_RECEPTORS;REACTOME\_GPCR\_DOWNSTREAM\_SIGNALING;RE

TOME\_MITOTIC\_G2\_G2\_M\_PHASES  
\_SIGNALLING\_EVENTS;REACTOME\_GPCR\_LIGAND\_BINDING

REACTOME\_BASIGIN\_INTERACTIONS;REACTOME\_INTEGRIN\_CELL\_SURFACE\_INTERACTION

ITRON\_CONTAINING\_PRE\_MRNA;REACTOME\_RNA\_POL\_II\_TRANSCRIPTION;REACTOME\_RN

DING

ESSENGERS;REACTOME\_SIGNALING\_BY\_THE\_B\_CELL\_RECEPTOR\_BCR;REACTOME\_NRAG  
ATH\_THROUGH\_JNK;REACTOME\_CELL\_DEATH\_SIGNALLING\_VIA\_NRAGE\_NRIF\_AND\_NADE;

IR

IR

N

N

N

CTION\_OF\_IFN\_ALPHA\_BETA\_PATHWAYS;REACTOME\_INNATE\_IMMUNE\_SYSTEM;REACTOM



:ACTOME\_P2Y\_RECEPTORS;REACTOME\_NUCLEOTIDE\_LIKE\_PURINERGIC\_RECEPTORS;REACTOME\_INTERFERON\_SIGNALING;REACTOME\_IMMUNE\_SYSTEM;REACTOME\_ADAPTIVE\_IMMUNE\_SYSTEM;REACTOME\_CYTOKINE\_SIGNALING\_IN\_IMMUNE\_SYSTEM

NSPORT  
NSPORT

A\_TRKA\_FROM\_THE\_PLASMA\_MEMBRANE;REACTOME\_SIGNALING\_BY\_FGFR\_IN\_DISEASE;F

;REACTOME\_TGF\_BETA\_RECEPTOR\_SIGNALING\_ACTIVATES\_SMADS;REACTOME\_RESPON  
GNALING

:ACTOME\_GPCR\_DOWNSTREAM\_SIGNALING;REACTOME\_GPCR\_LIGAND\_BINDING

OLIGOPEPTIDES;REACTOME\_PLATELET\_HOMEOSTASIS;REACTOME\_PLATELET\_CALCIIUM\_H

\_AND\_GROWTH\_CONE\_COLLAPSE

IN\_THE\_LAGGING\_STRAND;REACTOME\_CELL\_CYCLE\_MITOTIC;REACTOME\_TRANSCRIPTIOI  
IN\_THE\_LAGGING\_STRAND;REACTOME\_CELL\_CYCLE\_MITOTIC;REACTOME\_TRANSCRIPTIOI  
IN\_THE\_LAGGING\_STRAND;REACTOME\_CELL\_CYCLE\_MITOTIC;REACTOME\_TRANSCRIPTIOI

CELL;REACTOME\_TRAFFICKING\_OF\_AMPA\_RECEPTORS

IS

TOME\_MITOTIC\_G2\_G2\_M\_PHASES

CELL;REACTOME\_TRAFFICKING\_OF\_AMPA\_RECEPTORS

2;REACTOME\_SIGNALING\_BY\_CONSTITUTIVELY\_ACTIVE\_EGFR;REACTOME\_SIGNALING\_BY.

OLIGOPEPTIDES

ORGANIC\_ACIDS\_METAL\_IONS\_AND\_AMINE\_COMPOUNDS;REACTOME\_BILE\_SALT\_AND\_OR

REGULATION;REACTOME\_REGULATION\_OF\_INSULIN\_SECRETION\_BY\_GLUCAGON\_LIKE\_PEP  
REGULATION;REACTOME\_REGULATION\_OF\_INSULIN\_SECRETION\_BY\_GLUCAGON\_LIKE\_PEP

NCAM\_INTERACTIONS;REACTOME\_NCAM\_SIGNALING\_FOR\_NEURITE\_OUT\_GROWTH  
NCAM\_INTERACTIONS;REACTOME\_NCAM\_SIGNALING\_FOR\_NEURITE\_OUT\_GROWTH  
RESPONSE

PLATELET\_CYTOSOLIC\_CA2\_;REACTOME\_SIGNALING\_BY\_GPCR;REACTOME\_PEPTIDE\_

RECEPTOR\_SYSTEM

P75\_NTR\_RECEPTOR\_MEDIATED\_SIGNALLING;REACTOME\_SIGNALING\_BY\_GPCR;REACTOM

SSING;REACTOME\_MRNA\_SPLICING;REACTOME\_TRANSCRIPTION;REACTOME\_MRNA\_3\_END

FACE\_INTERACTIONS;REACTOME\_HEMOSTASIS;REACTOME\_IMMUNE\_SYSTEM;REACTOME\_M1\_INTERACTIONS;REACTOME\_NCAM\_SIGNALING\_FOR\_NEURITE\_OUT\_GROWTH

TOME\_MITOTIC\_G2\_G2\_M\_PHASES

GCLEOTIDE\_LIKE\_PURINERGIC\_RECEPTORS;REACTOME\_GPCR\_DOWNSTREAM\_SIGNALING

TS;REACTOME\_M\_G1\_TRANSITION;REACTOME\_G1\_S\_TRANSITION;REACTOME\_SYNTHESIS\_AND\_GROWTH\_CONE\_COLLAPSE  
G\_IN\_IMMUNE\_SYSTEM

OLISM\_OF\_LIPIDS\_AND\_LIPOPROTEINS

CELL;REACTOME\_INHIBITION\_OF\_VOLTAGE\_GATED\_CA2\_CHANNELS\_VIA\_GBETA\_GAMMA\_CELL;REACTOME\_INHIBITION\_OF\_VOLTAGE\_GATED\_CA2\_CHANNELS\_VIA\_GBETA\_GAMMA\_

IRS;REACTOME\_G\_ALPHA\_Q\_SIGNALLING\_EVENTS;REACTOME\_GPCR\_DOWNSTREAM\_SIGI  
\_TRANSCRIPTION;REACTOME\_RNA\_POL\_III\_TRANSCRIPTION\_INITIATION\_FROM\_TYPE\_3\_F  
\_TRANSCRIPTION;REACTOME\_RNA\_POL\_III\_TRANSCRIPTION\_INITIATION\_FROM\_TYPE\_3\_F

ACTIVATION\_OF\_ARYLSULFATASES;REACTOME\_METABOLISM\_OF\_PROTEINS;REACTOME\_S

STEM

75\_NTR\_RECEPTOR\_MEDIATED\_SIGNALLING;REACTOME\_ROLE\_OF\_DCC\_IN\_REGULATING\_

CING;REACTOME\_MITOTIC\_M\_M\_G1\_PHASES;REACTOME\_CHROMOSOME\_MAINTENANCE;F  
.SOME\_DEGRADATION

P75\_NTR\_RECEPTOR\_MEDIATED\_SIGNALLING;REACTOME\_SIGNALING\_BY\_GPCR;REACTOM

≡\_FATTY\_ACID\_TRIACYLGLYCEROL\_AND\_KETONE\_BODY\_METABOLISM;REACTOME\_TRANS

RY\_METABOLISM;REACTOME\_SYNTHESIS\_OF\_VERY\_LONG\_CHAIN\_FATTY\_ACYL\_COAS

1;REACTOME\_GLYCOSAMINOGLYCAN\_METABOLISM;REACTOME\_A\_TETRASACCHARIDE\_LIN  
LIGOPEPTIDES

3;METABOLISM;REACTOME\_GLYCOSAMINOGLYCAN\_METABOLISM;REACTOME\_A\_TETRASA  
ACTOME\_ION\_CHANNEL\_TRANSPORT;REACTOME\_HEMOSTASIS

IS;REACTOME\_INTERACTION\_BETWEEN\_L1\_AND\_ANKYRINS;REACTOME\_SIGNAL\_TRANSDU  
IS;REACTOME\_INTERACTION\_BETWEEN\_L1\_AND\_ANKYRINS;REACTOME\_SIGNAL\_TRANSDU



TOME\_MITOTIC\_M\_M\_G1\_PHASES;REACTOME\_MITOTIC\_G2\_G2\_M\_PHASES;REACTOME\_DN

NOTCH3;REACTOME\_RECEPTOR\_LIGAND\_BINDING\_INITIATES\_THE\_SECOND\_PROTEOLYTI

VELOPMENT\_AND\_PLATELET\_PRODUCTION;REACTOME\_KINESINS;REACTOME\_DNA\_REPL

)\_ANKYRINS

LISM\_OF\_LIPIDS\_AND\_LIPOPROTEINS;REACTOME\_LIPID\_DIGESTION\_MOBILIZATION\_AND\_T

ORGANIC\_ACIDS\_METAL\_IONS\_AND\_AMINE\_COMPOUNDS;REACTOME\_ZINC\_TRANSPORTER

REACTOME\_MITOTIC\_G2\_G2\_M\_PHASES  
REACTOME\_MITOTIC\_G2\_G2\_M\_PHASES

CONSTITUTIVELY\_ACTIVE\_EGFR;REACTOME\_SIGNALING\_BY\_EGFR\_IN\_CANCER;REACTOME

REACTOME\_METABOLISM\_OF\_LIPIDS\_AND\_LIOPROTEINS

IRS;REACTOME\_G\_ALPHA\_Q\_SIGNALLING\_EVENTS;REACTOME\_GPCR\_DOWNSTREAM\_SIGI

PATHWAY;REACTOME\_ER\_PHAGOSOME\_PATHWAY;REACTOME\_NEF\_MEDIATES\_DOWN\_MODU

ORGANIZATION;REACTOME\_APOPTOSIS;REACTOME\_APOPTOTIC\_EXECUTION\_PHASE

APOTAMOSTASIS

REACTOME\_SIGNALING\_BY\_ERBB4;REACTOME\_DOWNREGULATION\_OF\_ERBB2\_ERBB3\_SIGNALING

ACTIVATION\_OF\_ARYLSULFATASES;REACTOME\_METABOLISM\_OF\_PROTEINS;REACTOME\_S

IE\_FACTORS\_INVOLVED\_IN\_MEGAKARYOCYTE\_DEVELOPMENT\_AND\_PLATELET\_PRODUCTI

CELL;REACTOME\_TRANSMEMBRANE\_TRANSPORT\_OF\_SMALL\_MOLECULES;REACTOME\_G/  
)\_AND\_SIGNALS\_SURVIVAL;REACTOME\_P75\_NTR\_RECEPTOR\_MEDIATED\_SIGNALLING;REA

TERFERON\_SIGNALING;REACTOME\_IMMUNE\_SYSTEM;REACTOME\_ADAPTIVE\_IMMUNE\_SYS

:ACTOME\_INTERACTION\_BETWEEN\_L1\_AND\_ANKYRINS;REACTOME\_NEPHRIN\_INTERACTIO

GNALLING\_EVENTS;REACTOME\_GPCR\_LIGAND\_BINDING

3ODY\_METABOLISM;REACTOME\_TRANSCRIPTIONAL\_REGULATION\_OF\_WHITE\_ADIPOCYTE\_

TOME\_MITOTIC\_G2\_G2\_M\_PHASES

\_P130CAS\_LINKAGE\_TO\_MAPK\_SIGNALING\_FOR\_INTEGRINS;REACTOME\_GRB2\_SOS\_PROV  
HA\_BETA\_PATHWAYS;REACTOME\_APOPTOSIS;REACTOME\_INNATE\_IMMUNE\_SYSTEM;REA

FR2;REACTOME\_SIGNALING\_BY\_FGFR\_MUTANTS;REACTOME\_FRS2\_MEDIATED\_CASCADE;I

IA\_NRAGE\_NRIF\_AND\_NADE;REACTOME\_P75\_NTR\_RECEPTOR\_MEDIATED\_SIGNALLING;RE/  
:\_SYSTEM

CTOME\_G1\_S\_TRANSITION;REACTOME\_SYNTHESIS\_OF\_DNA;REACTOME\_MITOTIC\_G1\_G1\_

OLIGOPEPTIDES

TOME\_MITOTIC\_G2\_G2\_M\_PHASES

OLIGOPEPTIDES

)\_AND\_SIGNALS\_SURVIVAL;REACTOME\_P75\_NTR\_RECEPTOR\_MEDIATED\_SIGNALLING;REA

PE\_3\_PROMOTER

IA\_NRAGE\_NRIF\_AND\_NADE;REACTOME\_P75\_NTR\_RECEPTOR\_MEDIATED\_SIGNALLING;RE/

POLYPEPTIDES

NE;REACTOME\_ACTIVATION\_OF\_THE\_MRNA\_UPON\_BINDING\_OF\_THE\_CAP\_BINDING\_COMF  
ECULES;REACTOME\_METABOLISM\_OF\_CARBOHYDRATES

ATION

BY\_METABOLISM;REACTOME\_SYNTHESIS\_OF\_VERY\_LONG\_CHAIN\_FATTY\_ACYL\_COAS

ME\_APOPTOSIS

\_A\_LYMPHOID\_AND\_A\_NON\_LYMPHOID\_CELL;REACTOME\_INTERFERON\_GAMMA\_SIGNALING

ME\_N\_GLYCAN\_TRIMMING\_IN\_THE\_ER\_AND\_CALNEXIN\_CALRETICULIN\_CYCLE  
:CEPTORS;REACTOME\_CHEMOKINE\_RECEPTORS\_BIND\_CHEMOKINES;REACTOME\_GPCR\_C

K\_CHANNELS

:TLA4\_INHIBITORY\_SIGNALING;REACTOME\_MITOTIC\_M\_M\_G1\_PHASES;REACTOME\_PLATEL

E\_GLUCOSE\_METABOLISM;REACTOME\_PLATELET\_ACTIVATION\_SIGNALING\_AND\_AGGREG



CELL;REACTOME\_TRAFFICKING\_OF\_AMPA\_RECEPTORS

CELL;REACTOME\_TRAFFICKING\_OF\_AMPA\_RECEPTORS;REACTOME\_TRAFFICKING\_OF\_GLI

THWAY;REACTOME\_NEUROTRANSMITTER\_RECEPTOR\_BINDING\_AND\_DOWNSTREAM\_TRAI

;\_COUPLING\_AND\_HEAT\_PRODUCTION\_BY\_UNCOUPLING\_PROTEINS\_

;YCLE\_MITOTIC;REACTOME\_CELL\_CYCLE\_CHECKPOINTS;REACTOME\_REGULATION\_OF\_MI

OLIGOPEPTIDES

\_BY\_ERBB4;REACTOME\_SIGNALING\_BY\_ILS;REACTOME\_IL\_3\_5\_AND\_GM\_CSF\_SIGNALING;F

;REACTOME\_REGULATED\_PROTEOLYSIS\_OF\_P75NTR;REACTOME\_P75NTR\_SIGNALS\_VIA\_N

\_LIPOPROTEINS;REACTOME\_FATTY\_ACID\_TRIACYLGLYCEROL\_AND\_KETONE\_BODY\_META

DING

1;REACTOME\_GLYCOSAMINOGLYCAN\_METABOLISM;REACTOME\_A\_TETRASACCHARIDE\_LIN

1E\_PHOSPHOLIPID\_METABOLISM;REACTOME\_PI\_METABOLISM;REACTOME\_GOLGI\_ASSOCI/

LET\_ACTIVATION\_SIGNALING\_AND\_AGGREGATION

DIATED\_SIGNALLING;REACTOME\_CELL\_CELL\_JUNCTION\_ORGANIZATION;REACTOME\_TIGHT

REACTOME\_TRANSPORT\_OF\_INORGANIC\_CATIONS\_ANIONS\_AND\_AMINO\_ACIDS\_OLIGOPEPTIDES

N

ACTOME\_GENERIC\_TRANSCRIPTION\_PATHWAY;REACTOME\_NOTCH\_HLH\_TRANSCRIPTION\_

AND\_REGULATION;REACTOME\_CELL\_CYCLE\_MITOTIC;REACTOME\_G1\_S\_TRANSITION;RE

CELL;REACTOME\_TRANSMEMBRANE\_TRANSPORT\_OF\_SMALL\_MOLECULES;REACTOME\_GA

;\_MEDIATED\_TRANSMEMBRANE\_TRANSPORT;REACTOME\_TRANSPORT\_OF\_GLUCOSE\_AND

\_INITIATION\_AND\_PROMOTER\_OPENING;REACTOME\_TRANSCRIPTION;REACTOME\_RNA\_PC

ADAPTIVE\_IMMUNE\_SYSTEM

;REACTOME\_RESPIRATORY\_ELECTRON\_TRANSPORT\_ATP\_SYNTHESIS\_BY\_CHEMIOSMOTIC

ACTOME\_REGULATION\_OF\_INSULIN\_SECRETION;REACTOME\_REGULATION\_OF\_INSULIN\_SE

GLYCOSYLATION;REACTOME\_BIOSYNTHESIS\_OF\_THE\_N\_GLYCAN\_PRECURSOR\_DOLICHOL

\_GPCR\_LIGAND\_BINDING

NG;REACTOME\_SIGNALING\_BY\_EGFR\_IN\_CANCER;REACTOME\_NGF\_SIGNALLING\_VIA\_TRK/

CELL;REACTOME\_ACTIVATION\_OF\_KAINATE\_RECEPTORS\_UPON\_Glutamate\_BINDING;RE

OLIGOPEPTIDES

ULFATE\_HEPARIN\_HS\_GAG\_METABOLISM;REACTOME\_GLYCOSAMINOGLYCAN\_METABOLIS

IR

S;REACTOME\_TRANSPORT\_OF\_ORGANIC\_ANIONS

\_A\_LYMPHOID\_AND\_A\_NON\_LYMPHOID\_CELL;REACTOME\_INTERFERON\_GAMMA\_SIGNALING

:\_EFFECTS\_OF\_PIP2\_HYDROLYSIS;REACTOME\_HEMOSTASIS;REACTOME\_PLATELET\_ACTIV

:\_EFFECTS\_OF\_PIP2\_HYDROLYSIS;REACTOME\_HEMOSTASIS;REACTOME\_PLATELET\_ACTIV

;\_AT\_THE\_PLASMA\_MEMBRANE;REACTOME\_PI\_METABOLISM;REACTOME\_METABOLISM\_OF  
\_REPLICATION\_INDEPENDENT\_DOUBLE\_STRAND\_BREAKS;REACTOME\_P53\_DEPENDENT\_G

NSTITUTIVELY\_ACTIVE\_EGFR;REACTOME\_GRB2\_EVENTS\_IN\_ERBB2\_SIGNALING;REACTOM  
)ME\_IMMUNE\_SYSTEM;REACTOME\_ADAPTIVE\_IMMUNE\_SYSTEM  
:CRETION;REACTOME\_VOLTAGE\_GATED\_POTASSIUM\_CHANNELS;REACTOME\_POTASSIUM

CELL;REACTOME\_TRANSMEMBRANE\_TRANSPORT\_OF\_SMALL\_MOLECULES;REACTOME\_G/

CASCADE;REACTOME\_HEMOSTASIS;REACTOME\_INNATE\_IMMUNE\_SYSTEM;REACTOME\_IM



ANTIGEN\_PRESENTATION\_SYSTEM;REACTOME\_CLASS\_I\_MHC\_MEDIATED\_ANTIGEN\_PROCESSING\_PRESENTATION

ACTIVATION\_OF\_ARYLSULFATASES;REACTOME\_METABOLISM\_OF\_PROTEINS;REACTOME\_S

RT\_OF\_MATURE\_TRANSCRIPT\_TO\_CYTOPLASM;REACTOME\_TRANSMEMBRANE\_TRANSPOR

REACTOME\_IRON\_UPTAKE\_AND\_TRANSPORT;REACTOME\_TRANSFERRIN\_ENDOCYTOSIS\_AN

REACTOME\_SIGNALING\_PATHWAYS

REACTOME\_CELL\_JUNCTION\_INTERACTIONS;REACTOME\_CELL\_JUNCTION\_ORGANIZATION;REACTOME\_SIC

REACTOME\_DEVELOPMENT\_AND\_PLATELET\_PRODUCTION;REACTOME\_HEMOSTASIS

REACTOME\_PDGFR\_SIGNALING;REACTOME\_AXON\_GUIDANCE;REACTOME\_NCAM1\_INTERACTIONS;REACTOME\_NC

REACTOME\_BODY\_METABOLISM;REACTOME\_TRANSCRIPTIONAL\_REGULATION\_OF\_WHITE\_ADIPOCYTE

REACTOME\_APOPTOSIS;REACTOME\_APOPTOTIC\_EXECUTION\_PHASE

REACTOME\_CELL;REACTOME\_ACETYLCHOLINE\_BINDING\_AND\_DOWNSTREAM\_EVENTS;REACTOME\_HI

ACTED\_EVENTS;REACTOME\_SIGNALING\_BY\_INSULIN\_RECEPTOR;REACTOME\_MTORC1\_MEDIATED\_EVENTS;REACTOME\_LIPOPROTEIN\_METABOLISM;REACTOME\_CHYLOMICRON\_MEDIATED\_LIPID\_TRANSPORT

REACTOME\_METABOLISM\_OF\_LIPIDS\_AND\_LIPOPROTEINS;REACTOME\_FATTY\_ACID\_TRIACYLGLYCEROL\_METABOLISM

REACTOME\_P75\_NTR\_RECEPTOR\_MEDIATED\_SIGNALING;REACTOME\_SIGNALING\_BY\_GPCR;REACTOME\_SIGNALING\_BY\_TYROSINE\_KINASE

REACTOME\_MITOTIC\_G2\_M\_PHASES;REACTOME\_SIGNALING\_BY\_NGF;REACTOME\_SIGNALING\_BY\_TYROSINE\_KINASE

PATHWAYS

ADAPTIVE\_IMMUNE\_SYSTEM

ADAPTIVE\_IMMUNE\_SYSTEM;REACTOME\_ADAPTIVE\_IMMUNE\_SYSTEM  
ADAPTIVE\_IMMUNE\_SYSTEM

ADAPTIVE\_IMMUNE\_SYSTEM;REACTOME\_ADAPTIVE\_IMMUNE\_SYSTEM

ADAPTIVE\_IMMUNE\_SYSTEM;REACTOME\_ADAPTIVE\_IMMUNE\_SYSTEM

ADAPTIVE\_IMMUNE\_SYSTEM;REACTOME\_ADAPTIVE\_IMMUNE\_SYSTEM

ADAPTIVE\_IMMUNE\_SYSTEM;REACTOME\_ADAPTIVE\_IMMUNE\_SYSTEM

N

CELLULAR\_PROTEINS;REACTOME\_INTEGRATION\_OF\_PROVIRUS;REACTOME\_APOBEC3G\_MEDIATED

FACE\_INTERACTIONS\_AT\_THE\_VASCULAR\_WALL;REACTOME\_PLATELET\_ADHESION\_TO\_ENDOTHELIAL

CELLS

CELLS;REACTOME\_REGULATION\_OF\_INSULIN\_SECRETION;REACTOME\_POTASSIUM\_CHANNEL\_ACTIVATION

OLIGOPEPTIDES

CELLS;REACTOME\_CELL\_CYCLE\_CHECKPOINTS;REACTOME\_REGULATION\_OF\_MITOSIS

CELLS;REACTOME\_CELL\_CYCLE\_CHECKPOINTS;REACTOME\_REGULATION\_OF\_MITOSIS

POLYPEPTIDES

\_S\_SIGNALLING\_EVENTS;REACTOME\_GPCR\_LIGAND\_BINDING

ORGANIC\_ACIDS\_METAL\_IONS\_AND\_AMINE\_COMPOUNDS;REACTOME\_AMINE\_COMPOUND\_

ORS;REACTOME\_G\_ALPHA\_Q\_SIGNALLING\_EVENTS;REACTOME\_GPCR\_DOWNSTREAM\_SIGI  
E\_INTEGRATION\_OF\_ENERGY\_METABOLISM;REACTOME\_OPIOID\_SIGNALLING;REACTOME\_I

AM1\_INTERACTIONS;REACTOME\_NCAM\_SIGNALING\_FOR\_NEURITE\_OUT\_GROWTH

)\_AND\_SIGNALS\_SURVIVAL;REACTOME\_P75\_NTR\_RECEPTOR\_MEDIATED\_SIGNALLING;REA

GO;REACTOME\_GOLGI;REACTOME\_KERATAN\_SULFATE\_BIOSYNTHESIS;REACTOME\_KERATAN\_SULFATE\_

REGULATION\_OF\_IFNG\_SIGNALING;REACTOME\_INTERFERON\_GAMMA\_SIG

P75\_NTR\_RECEPTOR\_MEDIATED\_SIGNALLING;REACTOME\_SIGNALING\_BY\_GPCR;REACTOM

ECULES;REACTOME\_METABOLISM\_OF\_CARBOHYDRATES

\_SIGNALLING\_EVENTS;REACTOME\_GPCR\_LIGAND\_BINDING

IAL\_SYSTEM;REACTOME\_CELL\_DEATH\_SIGNALLING\_VIA\_NRAGE\_NRF1\_AND\_NAIP1;REACTO  
HASE

:ANSITION;REACTOME\_G1\_S\_TRANSITION;REACTOME\_POL\_SWITCHING;REACTOME\_SYNTI

NS;REACTOME\_SEMA3A\_PLEXIN\_REPULSION\_SIGNALING\_BY\_INHIBITING\_INTEGRIN\_ADHE

ADING\_TO\_GENERATION\_OF\_SECOND\_MESSENGERS;REACTOME\_SIGNALING\_BY\_THE\_B\_C

ND\_INACTIVATION\_OF\_GLP1

MENTS

LEX\_AND\_EIFS\_AND\_SUBSEQUENT\_BINDING\_TO\_43S;REACTOME\_METABOLISM\_OF\_PROTI

LET\_ACTIVATION\_SIGNALING\_AND\_AGGREGATION



HIV\_LIFE\_CYCLE

YCAN\_ANTENNAE\_ELONGATION\_IN\_THE\_MEDIAL\_TRANS\_GOLGI

DTCH1;REACTOME\_GENERIC\_TRANSCRIPTION\_PATHWAY;REACTOME\_RNA\_POL\_I\_TRANSC

RT\_OF\_SMALL\_MOLECULES;REACTOME\_MRNA\_PROCESSING;REACTOME\_TRANSPORT\_OF\_

N\_ACROSS\_CHEMICAL\_SYNAPSES;REACTOME\_NEURONAL\_SYSTEM;REACTOME\_SIGNALIN  
LE;REACTOME\_NGF\_SIGNALLING\_VIA\_TRKA\_FROM\_THE\_PLASMA\_MEMBRANE;REACTOME\_

DEPENDENT\_GLUCOSE\_TRANSPORTERS

EINS;REACTOME\_3\_UTR\_MEDIATED\_TRANSLATIONAL\_REGULATION

IFKB;REACTOME\_NRF1\_SIGNALS\_CELL\_DEATH\_FROM\_THE\_NUCLEUS;REACTOME\_NFKB\_IS

REACTOME\_TRANSPORT\_OF\_INORGANIC\_CATIONS\_ANIONS\_AND\_AMINO\_ACIDS\_OLIGOPEPT



2\_M\_PHASES

Y\_GPCR;REACTOME\_INTEGRATION\_OF\_ENERGY\_METABOLISM;REACTOME\_OPIOID\_SIGNAL

REACTOME\_TRANSCRIPTION;REACTOME\_MRNA\_3\_END\_PROCESSING;REACTOME\_CLEAVAGE

MEG\_ALPHA1213\_SIGNALLING\_EVENTS;REACTOME\_GPCR\_DOWNSTREAM\_SIGNALING

DOWNSTREAM\_SIGNALING\_EVENTS\_OF\_B\_CELL\_RECEPTOR\_BCR;REACTOME\_SIGNALING\_BY\_DOWNSTREAM\_SIGNALING\_EVENTS\_OF\_B\_CELL\_RECEPTOR\_BCR;REACTOME\_SIGNALING\_BY\_DOWNSTREAM\_SIGNALING\_EVENTS\_OF\_B\_CELL\_RECEPTOR\_BCR

MEG\_ALPHA1213\_SIGNALLING\_EVENTS;REACTOME\_GPCR\_DOWNSTREAM\_SIGNALING

DME\_CIRCADIAN\_REPRESSION\_OF\_EXPRESSION\_BY\_REV\_ERBA;REACTOME\_GENERIC\_TR

JAM\_SIGNALING\_FOR\_NEURITE\_OUT\_GROWTH  
ME\_G\_ALPHA1213\_SIGNALLING\_EVENTS;REACTOME\_GPCR\_DOWNSTREAM\_SIGNALING

\_PI3K\_EVENTS\_IN\_ERBB4\_SIGNALING;REACTOME\_PI3K\_EVENTS\_IN\_ERBB2\_SIGNALING;RE



NOTCH\_HLH\_TRANSCRIPTION\_PATHWAY;REACTOME\_SIGNALING\_BY\_NOTCH

ROTEIN\_METABOLISM

ISCRPTIONAL\_ACTIVITY;REACTOME\_GENERIC\_TRANSCRIPTION\_PATHWAY;REACTOME\_ME  
TIVATION;REACTOME\_TRAF6\_MEDIATED\_INDUCTION\_OF\_NFKB\_AND\_MAP\_KINASES\_UPON\_



DIATED\_TRANSMEMBRANE\_TRANSPORT;REACTOME\_TRANSPORT\_OF\_INORGANIC\_CATION

CRIPATIONAL\_REGULATION\_OF\_WHITE\_ADIPOCYTE\_DIFFERENTIATION

ATED\_VESICLE\_BIOGENESIS;REACTOME\_METABOLISM\_OF\_LIPIDS\_AND\_LIPOPROTEINS

;TOME\_EFFECTS\_OF\_PIP2\_HYDROLYSIS;REACTOME\_METABOLISM\_OF\_LIPIDS\_AND\_LIPOP

\_PI3K\_EVENTS\_IN\_ERBB4\_SIGNALING;REACTOME\_PI3K\_EVENTS\_IN\_ERBB2\_SIGNALING;RE  
\_PI3K\_EVENTS\_IN\_ERBB4\_SIGNALING;REACTOME\_PI3K\_EVENTS\_IN\_ERBB2\_SIGNALING;RE

VALING;REACTOME\_GPCR\_LIGAND\_BINDING

3;REACTOME\_INTERFERON\_ALPHA\_BETA\_SIGNALING;REACTOME\_INTERFERON\_SIGNALIN

TOME\_GLUCOSE\_TRANSPORT;REACTOME\_METABOLISM\_OF\_CARBOHYDRATES;REACTOM

ITTER\_RECEPTOR\_BINDING\_AND\_DOWNSTREAM\_TRANSMISSION\_IN\_THE\_POSTSYNAPTIC

ION;REACTOME\_NCAM\_SIGNALING\_FOR\_NEURITE\_OUT\_GROWTH;REACTOME\_INHIBITION\_

E\_SIGNALING\_BY\_EGFR\_IN\_CANCER;REACTOME\_SHC1\_EVENTS\_IN\_ERBB4\_SIGNALING;RE  
CELL\_RECEPTOR\_BCR;REACTOME\_NGF\_SIGNALLING\_VIA\_TRKA\_FROM\_THE\_PLASMA\_MEM



3HLY\_CALCIIUM\_PERMEABLE\_POSTSYNAPTIC\_NICOTINIC\_ACETYLCHOLINE\_RECEPTORS

SECRETIN\_FAMILY\_RECEPTORS;REACTOME\_GLUCAGON\_TYPE\_LIGAND\_RECEPTORS;REACT  
\_LIPOPROTEINS;REACTOME\_FATTY\_ACID\_TRIACYLGLYCEROL\_AND\_KETONE\_BODY\_METAB

Y\_PROTEINS\_THAT\_BIND\_AU\_RICH\_ELEMENTS;REACTOME\_DESTABILIZATION\_OF\_MRNA\_E

ION\_DEPENDENT\_MRNA\_DECAY;REACTOME\_METABOLISM\_OF\_RNA;REACTOME\_DESTABIL

O\_ELEVATED\_PLATELET\_CYTOSOLIC\_CA2\_;REACTOME\_TRANSMISSION\_ACROSS\_CHEMICAL

\_OF\_DNA;REACTOME\_MITOTIC\_G1\_G1\_S\_PHASES;REACTOME\_MITOTIC\_M\_M\_G1\_PHASES;

ME\_G\_ALPHA1213\_SIGNALLING\_EVENTS;REACTOME\_GPCR\_DOWNSTREAM\_SIGNALING

TEM;REACTOME\_CYTOKINE\_SIGNALING\_IN\_IMMUNE\_SYSTEM;REACTOME\_CLASS\_I\_MHC\_M

/E\_G\_ALPHA1213\_SIGNALLING\_EVENTS;REACTOME\_GPCR\_DOWNSTREAM\_SIGNALING

/E\_G\_ALPHA1213\_SIGNALLING\_EVENTS;REACTOME\_GPCR\_DOWNSTREAM\_SIGNALING

;REACTOME\_AMINO\_ACID\_AND\_OLIGOPEPTIDE\_SLC\_TRANSPORTERS

;REACTOME\_AMINO\_ACID\_AND\_OLIGOPEPTIDE\_SLC\_TRANSPORTERS

RESOLUTION\_OF\_AP\_SITES\_VIA\_THE\_SINGLE\_NUCLEOTIDE\_REPLACEMENT\_PATHWAY  
RESOLUTION\_OF\_AP\_SITES\_VIA\_THE\_SINGLE\_NUCLEOTIDE\_REPLACEMENT\_PATHWAY

RESPONSE\_TO\_REPLICATION\_STRESS;REACTOME\_MEIOTIC\_SYNAPSIS;REACTOME\_G2\_M\_I  
TION;REACTOME\_ADP\_SIGNALLING\_THROUGH\_P2RY12;REACTOME\_GPCR\_LIGAND\_BINDIN

REGULATION\_OF\_INSULIN\_SECRETION;REACTOME\_SLC\_MEDIATED\_TRANSMEMBRANE\_TF

NER;REACTOME\_SYNTHESIS\_OF\_DNA;REACTOME\_DNA\_REPAIR;REACTOME\_CHROMOSC

ME\_METABOLISM\_OF\_LIPIDS\_AND\_LIPOPROTEINS;REACTOME\_FATTY\_ACID\_TRIACYLGLYC



VENTS\_IN\_ERBB2\_SIGNALING;REACTOME\_NUCLEAR\_SIGNALING\_BY\_ERBB4

ANE\_TRANSPORT\_OF\_SMALL\_MOLECULES;REACTOME\_IRON\_UPTAKE\_AND\_TRANSPORT;F

;IGNALING;REACTOME\_INTERFERON\_SIGNALING;REACTOME\_RIG\_I\_MDA5\_MEDIATED\_INDL

\_SIGNAL\_TRANSDUCTION;REACTOME\_SIGNALING\_BY\_ILS;REACTOME\_REGULATION\_OF\_SI



OME\_INTERFERON\_SIGNALING;REACTOME\_IMMUNE\_SYSTEM;REACTOME\_CYTOKINE\_SIGN,

LISM\_OF\_LIPIDS\_AND\_LIOPROTEINS  
LISM\_OF\_LIPIDS\_AND\_LIOPROTEINS

\_DIFFERENTIATION

:LLING\_OF\_PS;REACTOME\_GLYCEROPHOSPHOLIPID\_BIOSYNTHESIS;REACTOME\_METABOL

OME\_INNATE\_IMMUNE\_SYSTEM;REACTOME\_IMMUNE\_SYSTEM;REACTOME\_TOLL\_RECEPTO

EINS;REACTOME\_3\_UTR\_MEDIATED\_TRANSLATIONAL\_REGULATION

\_BY\_EGFR\_IN\_CANCER;REACTOME\_SHC1\_EVENTS\_IN\_ERBB4\_SIGNALING;REACTOME\_INSU

3HLY\_CALCIIUM\_PERMEABLE\_POSTSYNAPTIC\_NICOTINIC\_ACETYLCHOLINE\_RECEPTORS;RI

PK\_TARGETS;REACTOME\_MYOGENESIS;REACTOME\_MAP\_KINASE\_ACTIVATION\_IN\_TLR\_CA

PROMOTER;REACTOME\_RNA\_POL\_III\_TRANSCRIPTION\_TERMINATION;REACTOME\_RNA\_POI

CIRCADIAN\_CLOCK;REACTOME\_TRANSCRIPTIONAL\_REGULATION\_OF\_WHITE\_ADIPOCYTE\_

OME\_CIRCADIAN\_REPRESSION\_OF\_EXPRESSION\_BY\_REV\_ERBA;REACTOME\_GENERIC\_TR

\_DIFFERENTIATION

\_AMINO\_ACIDS\_OLIGOPEPTIDES;REACTOME\_AMINO\_ACID\_AND\_OLIGOPEPTIDE\_SLC\_TRAN

:ACTOME\_IONOTROPIC\_ACTIVITY\_OF\_KAINATE\_RECEPTORS

:ACTOME\_IONOTROPIC\_ACTIVITY\_OF\_KAINATE\_RECEPTORS

NEUROTRANSMITTER\_RECEPTOR\_BINDING\_AND\_DOWNSTREAM\_TRANSMISSION\_IN\_THE\_

TOME\_IMMUNE\_SYSTEM;REACTOME\_CYTOKINE\_SIGNALING\_IN\_IMMUNE\_SYSTEM  
OME\_CIRCADIAN\_REPRESSION\_OF\_EXPRESSION\_BY\_REV\_ERBA;REACTOME\_GENERIC\_TR  
OME\_CIRCADIAN\_REPRESSION\_OF\_EXPRESSION\_BY\_REV\_ERBA;REACTOME\_GENERIC\_TR

Ξ\_NOTCH\_EXPRESSION\_AND\_PROCESSING;REACTOME\_NOTCH1\_INTRACELLULAR\_DOMAI

OME\_IMMUNE\_SYSTEM;REACTOME\_TOLL\_RECEPTOR\_CASCADES

ME\_IMMUNE\_SYSTEM;REACTOME\_TOLL\_RECEPTOR\_CASCADES

LEASE\_CYCLE

CRIPTIONAL\_REGULATION\_OF\_WHITE\_ADIPOCYTE\_DIFFERENTIATION

REACTOME\_SIGNALING\_BY\_GPCR;REACTOME\_G\_ALPHA1213\_SIGNALLING\_EVENTS;REACTC

TOTIC\_CELL\_CYCLE;REACTOME\_APC\_C\_CDH1\_MEDIATED\_DEGRADATION\_OF\_CDC20\_AND

VALING;REACTOME\_GPCR\_LIGAND\_BINDING  
ANSPORTERS;REACTOME\_IRON\_UPTAKE\_AND\_TRANSPORT  
ANSPORTERS;REACTOME\_IRON\_UPTAKE\_AND\_TRANSPORT

;REACTOME\_AMINO\_ACID\_AND\_OLIGOPEPTIDE\_SLC\_TRANSPORTERS

VNSTREAM\_SIGNALING\_EVENTS\_OF\_B\_CELL\_RECEPTOR\_BCR;REACTOME\_SIGNALING\_BY\_

ESOLUTION\_OF\_AP\_SITES\_VIA\_THE\_SINGLE\_NUCLEOTIDE\_REPLACEMENT\_PATHWAY



ME\_HEMOSTASIS;REACTOME\_PLATELET\_ACTIVATION\_SIGNALING\_AND\_AGGREGATION

;REACTOME\_PEROXISOMAL\_LIPID\_METABOLISM;REACTOME\_METABOLISM\_OF\_LIPIDS\_AND

2\_M\_PHASES

OME\_CIRCADIAN\_REPRESSION\_OF\_EXPRESSION\_BY\_REV\_ERBA;REACTOME\_GENERIC\_TR

.YS;REACTOME\_INNATE\_IMMUNE\_SYSTEM;REACTOME\_IMMUNE\_SYSTEM;REACTOME\_CYTC

.EGATION

DEPENDENT\_GLUCOSE\_TRANSPORTERS

VNSTREAM\_SIGNALING\_EVENTS\_OF\_B\_CELL\_RECEPTOR\_BCR;REACTOME\_SIGNALING\_BY

IKER\_SEQUENCE\_IS\_REQUIRED\_FOR\_GAG\_SYNTHESIS;REACTOME\_METABOLISM\_OF\_LIPII  
IKER\_SEQUENCE\_IS\_REQUIRED\_FOR\_GAG\_SYNTHESIS;REACTOME\_METABOLISM\_OF\_LIPII

KINASE\_AND\_TRANSCRIPTION\_FACTOR\_ACTIVATION;REACTOME\_ERK\_MAPK\_TARGETS;RE

T\_OF\_INORGANIC\_CATIONS\_ANIONS\_AND\_AMINO\_ACIDS\_OLIGOPEPTIDES;REACTOME\_ME  
T\_OF\_INORGANIC\_CATIONS\_ANIONS\_AND\_AMINO\_ACIDS\_OLIGOPEPTIDES;REACTOME\_ME

PECAM1\_INTERACTIONS;REACTOME\_TCR\_SIGNALING;REACTOME\_DOWNSTREAM\_TCR\_SIK

CRIPATIONAL\_REGULATION\_OF\_WHITE\_ADIPOCYTE\_DIFFERENTIATION

\_MTOR\_BY\_LKB1\_AMPK;REACTOME\_REGULATION\_OF\_RHEB\_GTPASE\_ACTIVITY\_BY\_AMPK  
;NALING;REACTOME\_INTERFERON\_ALPHA\_BETA\_SIGNALING;REACTOME\_REGULATION\_OF

;REACTOME\_GPCR\_LIGAND\_BINDING

ME\_SEMAPHORIN\_INTERACTIONS;REACTOME\_SEMA4D\_INDUCED\_CELL\_MIGRATION\_AND

\_PATHWAY;REACTOME\_RECEPTOR\_LIGAND\_BINDING\_INITIATES\_THE\_SECOND\_PROTEOLY  
\_PATHWAY;REACTOME\_RECEPTOR\_LIGAND\_BINDING\_INITIATES\_THE\_SECOND\_PROTEOLY

PROMOTER;REACTOME\_RNA\_POL\_III\_TRANSCRIPTION\_TERMINATION;REACTOME\_RNA\_POI

ACTOME\_SIGNALING\_BY\_GPCR;REACTOME\_AXON\_GUIDANCE;REACTOME\_G\_ALPHA1213\_S

RT\_OF\_SMALL\_MOLECULES;REACTOME\_MRNA\_PROCESSING;REACTOME\_TRANSPORT\_OF\_

\_SION\_SIGNALING\_BY\_INHIBITING\_INTEGRIN\_ADHESION

ME\_G\_ALPHA1213\_SIGNALLING\_EVENTS;REACTOME\_GPCR\_DOWNSTREAM\_SIGNALING



PATHWAY;REACTOME\_METABOLISM\_OF\_PROTEINS;REACTOME\_FORMATION\_OF\_FIBRIN\_C

;LP1  
;LP1

AND\_LIPOPROTEINS



REACTOME\_IMMUNE\_SYSTEM;REACTOME\_ADAPTIVE\_IMMUNE\_SYSTEM  
TOME\_RAP1\_SIGNALLING;REACTOME\_PLATELET\_AGGREGATION\_PLUG\_FORMATION;REAC  
3HLY\_CALCIUM\_PERMEABLE\_POSTSYNAPTIC\_NICOTINIC\_ACETYLCHOLINE\_RECEPTORS;RI

OME\_L1CAM\_INTERACTIONS;REACTOME\_SIGNAL\_TRANSDUCTION\_BY\_L1;REACTOME\_HEM

ANTS;REACTOME\_SIGNALING\_BY\_FGFR\_MUTANTS;REACTOME\_SIGNALING\_BY\_PDGF;REA

AND\_ORGANIC\_ACIDS\_METAL\_IONS\_AND\_AMINE\_COMPOUNDS;REACTOME\_METAL\_ION\_SI

TOR;REACTOME\_SIGNAL\_ATTENUATION;REACTOME\_SOS\_MEDIATED\_SIGNALLING;REACTO

VALING;REACTOME\_G\_ALPHA\_I\_SIGNALLING\_EVENTS;REACTOME\_GPCR\_LIGAND\_BINDING

\_OF\_GLUCOSE\_AND\_OTHER\_SUGARS\_BILE\_SALTS\_AND\_ORGANIC\_ACIDS\_METAL\_IONS\_AI

ITS\_IN\_ERBB4\_SIGNALING;REACTOME\_INSULIN\_RECEPTOR\_SIGNALLING\_CASCADE;REACT

<

ME\_GPCR\_LIGAND\_BINDING

\_SION\_SIGNALING\_BY\_INHIBITING\_INTEGRIN\_ADHESION

RESPONSE\_TO\_REPLICATION\_STRESS;REACTOME\_MEIOTIC\_SYNAPSIS;REACTOME\_G2\_M\_

ANTIGEN\_PROCESSING\_PRESENTATION;REACTOME\_ANTIGEN\_PROCESSING\_UBIQUITINATION  
ANTIGEN\_PROCESSING\_PRESENTATION;REACTOME\_ANTIGEN\_PROCESSING\_UBIQUITINATION

GABA\_A\_RECEPTOR\_ACTIVATION;REACTOME\_GABA\_RECEPTOR\_ACTIVATION;REACTOME\_IC

\_AND\_NADE;REACTOME\_P75\_NTR\_RECEPTOR\_MEDIATED\_SIGNALLING;REACTOME\_SIGNA  
\_AND\_NADE;REACTOME\_P75\_NTR\_RECEPTOR\_MEDIATED\_SIGNALLING;REACTOME\_SIGNA

.RHEB\_GTPASE\_ACTIVITY\_BY\_AMPK;REACTOME\_PKB\_MEDIATED\_EVENTS;REACTOME\_SIG

MAPK

EGFR\_IN\_CANCER;REACTOME\_PI3K\_EVENTS\_IN\_ERBB4\_SIGNALING;REACTOME\_PI3K\_EVENTS

DIACYLGLYCERIDE\_LINKER\_SEQUENCE\_IS\_REQUIRED\_FOR\_GAG\_SYNTHESIS;REACTOME\_METABOLISM

DIACYLGLYCERIDE\_LINKER\_SEQUENCE\_IS\_REQUIRED\_FOR\_GAG\_SYNTHESIS;REACTOME\_POST\_TRANSLATIONAL\_PROTEIN\_MODIFICATION;

REACTOME\_G2\_M\_CHECKPOINTS;REACTOME\_G2\_M\_DNA\_DAMAGE\_CHECKPOINT

REACTOME\_G2\_M\_CHECKPOINTS;REACTOME\_G2\_M\_DNA\_DAMAGE\_CHECKPOINT

IM\_SIGNALING\_OF\_ACTIVATED\_FGFR;REACTOME\_PHOSPHOLIPASE\_C\_MEDIATED\_CASCAD  
IM\_SIGNALING\_OF\_ACTIVATED\_FGFR;REACTOME\_PHOSPHOLIPASE\_C\_MEDIATED\_CASCAD  
IM\_SIGNALING\_OF\_ACTIVATED\_FGFR;REACTOME\_PHOSPHOLIPASE\_C\_MEDIATED\_CASCAD

REACTOME\_METABOLISM\_OF\_RNA;REACTOME\_INFLUENZA\_LIFE\_CYCLE;REACTOME\_INFLUE

YCAN\_ANTENNAE\_ELONGATION\_IN\_THE\_MEDIAL\_TRANS\_GOLGI  
\_LIPID\_LINKED\_OLIGOSACCHARIDE\_LLO\_AND\_TRANSFER\_TO\_A\_NASCENT\_PROTEIN

CELL\_RECEPTOR\_BCR;REACTOME\_NGF\_SIGNALLING\_VIA\_TRKA\_FROM\_THE\_PLASMA\_MEM

EACTOME\_METABOLISM\_OF\_RNA;REACTOME\_INFLUENZA\_LIFE\_CYCLE;REACTOME\_INFLUE



ACTOME\_ADAPTIVE\_IMMUNE\_SYSTEM

ACTIVATION\_SIGNALING\_AND\_AGGREGATION

ACTED\_HUMAN\_TAK1;REACTOME\_ACTIVATED\_TAK1\_MEDIATES\_P38\_MAPK\_ACTIVATION;REACT

N\_ACROSS\_CHEMICAL\_SYNAPSES;REACTOME\_NEURONAL\_SYSTEM;REACTOME\_SIGNALIN

E\_INTERACTIONS;REACTOME\_SIGNALING\_BY\_PDGF;REACTOME\_GPVI\_MEDIATED\_ACTIVAT

REACTOME\_DOWNSTREAM\_SIGNALING\_EVENTS\_OF\_B\_CELL\_RECEPTOR\_BCR;REACTOME\_  
PLEX\_FORMATION;REACTOME\_CELL\_CYCLE\_MITOTIC;REACTOME\_CELL\_CYCLE\_CHECKPOI

ATION\_SIGNALING\_AND\_AGGREGATION

ATION\_SIGNALING\_AND\_AGGREGATION

D\_RECYCLING;REACTOME\_SIGNALING\_BY\_INSULIN\_RECEPTOR

LASE;REACTOME\_PLATELET\_HOMEOSTASIS;REACTOME\_HEMOSTASIS

ARYOCYTE\_DEVELOPMENT\_AND\_PLATELET\_PRODUCTION;REACTOME\_HEMOSTASIS

\_MTOR\_BY\_LKB1\_AMPK;REACTOME\_REGULATION\_OF\_RHEB\_GTPASE\_ACTIVITY\_BY\_AMPK

\_MTOR\_BY\_LKB1\_AMPK;REACTOME\_REGULATION\_OF\_RHEB\_GTPASE\_ACTIVITY\_BY\_AMPK

MUTANTS\_OF\_FGFR1;REACTOME\_SIGNALING\_BY\_FGFR\_MUTANTS;REACTOME\_AXON\_GUIDANCE  
MUTANTS\_OF\_FGFR1;REACTOME\_SIGNALING\_BY\_FGFR\_MUTANTS;REACTOME\_AXON\_GUIDANCE

RESOLUTION\_OF\_AP\_SITES\_VIA\_THE\_SINGLE\_NUCLEOTIDE\_REPLACEMENT\_PATHWAY

3ESTION\_MOBILIZATION\_AND\_TRANSPORT

DIATED\_TRANSMEMBRANE\_TRANSPORT;REACTOME\_TRANSPORT\_OF\_INORGANIC\_CATION

L\_ATTENUATION;REACTOME\_SHC\_MEDIATED\_SIGNALLING;REACTOME\_SHC\_RELATED\_EV

VNSTREAM\_SIGNALING\_EVENTS\_OF\_B\_CELL\_RECEPTOR\_BCR;REACTOME\_SIGNALING\_BY\_

SMITTER\_RELEASE\_CYCLE;REACTOME\_ACETYLCHOLINE\_NEUROTRANSMITTER\_RELEASE

JT\_GROWTH;REACTOME\_L1CAM\_INTERACTIONS;REACTOME\_INTERACTION\_BETWEEN\_L1\_

JT\_GROWTH;REACTOME\_L1CAM\_INTERACTIONS;REACTOME\_INTERACTION\_BETWEEN\_L1\_

JT\_GROWTH;REACTOME\_L1CAM\_INTERACTIONS;REACTOME\_INTERACTION\_BETWEEN\_L1\_

JT\_GROWTH;REACTOME\_L1CAM\_INTERACTIONS;REACTOME\_INTERACTION\_BETWEEN\_L1\_

\_LIPID\_LINKED\_OLIGOSACCHARIDE\_LLO\_AND\_TRANSFER\_TO\_A\_NASCENT\_PROTEIN

\_SIGNAL\_TRANSDUCTION;REACTOME\_SIGNALING\_BY\_ILS;REACTOME\_REGULATION\_OF\_SI

CTOME\_IMMUNE\_SYSTEM

ROTEIN\_METABOLISM  
ROTEIN\_METABOLISM

IN\_PLUG\_FORMATION;REACTOME\_HEMOSTASIS;REACTOME\_PLATELET\_ACTIVATION\_SIGN.

NEUROTRANSMITTER\_RELEASE\_CYCLE;REACTOME\_METABOLISM\_OF\_LIPIDS\_AND\_LIPO



CTOME\_IMMUNE\_SYSTEM;REACTOME\_ADAPTIVE\_IMMUNE\_SYSTEM;REACTOME\_CYTOKINE

EACTOME\_DOWNSTREAM\_SIGNALING\_EVENTS\_OF\_B\_CELL\_RECEPTOR\_BCR;REACTOME\_

M\_THE\_PLASMA\_MEMBRANE;REACTOME\_MHC\_CLASS\_II\_ANTIGEN\_PRESENTATION;REACT

PROTEINS;REACTOME\_FATTY\_ACID\_TRIACYLGLYCEROL\_AND\_KETONE\_BODY\_METABOLIS

HOMEOSTASIS;REACTOME\_PKB\_MEDIATED\_EVENTS;REACTOME\_SIGNALING\_BY\_INSULIN\_R  
LISM\_OF\_LIPIDS\_AND\_LIPOPROTEINS

KE\_RECEPTORS;REACTOME\_G\_ALPHA\_Q\_SIGNALLING\_EVENTS;REACTOME\_GPCR\_DOWN  
\_NEUROTRANSMITTER\_TRANSPORTERS;REACTOME\_AMINE\_COMPOUND\_SLC\_TRANSPOR

IA\_REPLICATION;REACTOME\_MITOTIC\_PROMETAPHASE

VNSTREAM\_SIGNALING\_EVENTS\_OF\_B\_CELL\_RECEPTOR\_BCR;REACTOME\_SIGNALING\_BY\_

REACTOME\_REPLICATION\_OF\_DNA;REACTOME\_MITOTIC\_G1\_G1\_S\_PHASES;REACTOME\_MITOTIC\_M\_M\_G1\_PHASES

REACTOME\_HORMONE\_SENSITIVE\_LIPASE\_HSL\_MEDIATED\_TRIACYLGLYCEROL\_HYDROLYSIS;FATTY\_ACID\_RECYCLING;REACTOME\_SIGNALING\_BY\_INSULIN\_RECEPTOR

REACTOME\_UBIQUITINATION\_PROTEASOME\_DEGRADATION;REACTOME\_VIF\_MEDIATED\_DEGRADATION;DNA\_DAMAGE\_RESPONSE;REACTOME\_REGULATION\_OF\_THE\_FANCONI\_ANEMIA\_PATHWAY

REACTOME\_SIGNALING\_BY\_GPCR;REACTOME\_AXON\_GUIDANCE;REACTOME\_G\_ALPHA1213\_SIGNALING

ACTOME\_SIGNALING\_BY\_GPCR;REACTOME\_AXON\_GUIDANCE;REACTOME\_G\_ALPHA1213\_S

EACTOME\_TRANSLOCATION\_OF\_ZAP\_70\_TO\_IMMUNOLOGICAL\_SYNAPSE;REACTOME\_GEN

TOME\_TRANSPORT\_OF\_VITAMINS\_NUCLEOSIDES\_AND\_RELATED\_MOLECULES;REACTOME

N\_ACROSS\_CHEMICAL\_SYNAPSES;REACTOME\_NEURONAL\_SYSTEM;REACTOME\_SIGNALIN

ABOLISM\_OF\_PROTEINS

ESOLUTION\_OF\_AP\_SITES\_VIA\_THE\_SINGLE\_NUCLEOTIDE\_REPLACEMENT\_PATHWAY

\_DIFFERENTIATION

3\_NER;REACTOME\_SYNTHESIS\_OF\_DNA;REACTOME\_DNA\_REPAIR;REACTOME\_CHROMOSC

JAM\_SIGNALING\_FOR\_NEURITE\_OUT\_GROWTH

LE;REACTOME\_LATE\_PHASE\_OF\_HIV\_LIFE\_CYCLE

TRANSPORT;REACTOME\_TRANSPORT\_OF\_INORGANIC\_CATIONS\_ANIONS\_AND\_AMINO\_ACID

PCR\_LIGAND\_BINDING

IT\_ACTIVATION\_SIGNALING\_AND\_AGGREGATION

\_ING;REACTOME\_SIGNALING\_BY\_ERBB2;REACTOME\_SIGNALING\_BY\_EGFR\_IN\_CANCER;RE  
C\_CLEAVAGE\_OF\_NOTCH\_RECEPTOR;REACTOME\_SIGNALING\_BY\_NOTCH

3HLY\_CALCIIUM\_PERMEABLE\_POSTSYNAPTIC\_NICOTINIC\_ACETYLCHOLINE\_RECEPTORS

NEUROTRANSMITTER\_RECEPTOR\_BINDING\_AND\_DOWNSTREAM\_TRANSMISSION\_IN\_THE\_



EACTOME\_POST\_TRANSLATIONAL\_PROTEIN\_MODIFICATION;REACTOME\_SYNTHESIS\_OF\_C

OID\_HORMONES;REACTOME\_METABOLISM\_OF\_LIPIDS\_AND\_LIPOPROTEINS

ME\_G\_ALPHA1213\_SIGNALLING\_EVENTS;REACTOME\_GPCR\_DOWNSTREAM\_SIGNALING

\_SLC\_TRANSPORTERS

REACTOME\_METABOLISM\_OF\_RNA;REACTOME\_INFLUENZA\_LIFE\_CYCLE;REACTOME\_INFLUE

R1\_AND\_WWTR1\_TAZ\_STIMULATED\_GENE\_EXPRESSION;REACTOME\_PRE\_NOTCH\_EXPRES  
R1\_AND\_WWTR1\_TAZ\_STIMULATED\_GENE\_EXPRESSION;REACTOME\_PRE\_NOTCH\_EXPRES  
R1\_AND\_WWTR1\_TAZ\_STIMULATED\_GENE\_EXPRESSION;REACTOME\_PRE\_NOTCH\_EXPRES  
N\_ACROSS\_CHEMICAL\_SYNAPSES;REACTOME\_NEURONAL\_SYSTEM;REACTOME\_SIGNALIN

\_TYPE\_ATPASES;REACTOME\_ION\_CHANNEL\_TRANSPORT;REACTOME\_SIGNALING\_BY\_NOT

RT\_OF\_SMALL\_MOLECULES;REACTOME\_MRNA\_PROCESSING;REACTOME\_TRANSPORT\_OF\_

RT\_OF\_SMALL\_MOLECULES;REACTOME\_MRNA\_PROCESSING;REACTOME\_TRANSPORT\_OF

IN\_PLUG\_FORMATION;REACTOME\_HEMOSTASIS;REACTOME\_PLATELET\_ACTIVATION\_SIGN

MUNE\_SYSTEM;REACTOME\_TOLL\_RECEPTOR\_CASCADES;REACTOME\_ADAPTIVE\_IMMUNE

POSTSYNAPTIC\_EVENTS;REACTOME\_POST\_NMDA\_RECEPTOR\_ACTIVATION\_EVENTS

GANIC\_ANION\_SLC\_TRANSPORTERS

NA\_POL\_II\_TRANSCRIPTION\_PRE\_INITIATION\_AND\_PROMOTER\_OPENING;REACTOME\_MRN

IGNALLING\_THROUGH\_PI3KGAMMA;REACTOME\_G\_PROTEIN\_BETA\_GAMMA\_SIGNALLING;REA

N;REACTOME\_NOTCH1\_INTRACELLULAR\_DOMAIN\_REGULATES\_TRANSCRIPTION;REACTOM  
N;REACTOME\_NOTCH1\_INTRACELLULAR\_DOMAIN\_REGULATES\_TRANSCRIPTION;REACTOM

MAP\_KINASES\_ACTIVATION\_MEDIATED\_BY\_TLR4\_SIGNALING\_REPERTOIRE;REACTOME\_M

GANIC\_ANION\_SLC\_TRANSPORTERS

GANIC\_ANION\_SLC\_TRANSPORTERS

M\_THE\_PLASMA\_MEMBRANE;REACTOME\_MHC\_CLASS\_II\_ANTIGEN\_PRESENTATION;REACT

EACTOME\_METABOLISM\_OF\_RNA;REACTOME\_INFLUENZA\_LIFE\_CYCLE;REACTOME\_INFLUE

DRIN\_SIGNALING;REACTOME\_SEMAPHORIN\_INTERACTIONS;REACTOME\_SEMA4D\_INDUCED  
ME\_GPCR\_LIGAND\_BINDING

TOME\_SIGNALING\_BY\_FGFR1\_FUSION\_MUTANTS;REACTOME\_SIGNALING\_BY\_FGFR\_MUTAN  
TOME\_SIGNALING\_BY\_FGFR1\_FUSION\_MUTANTS;REACTOME\_SIGNALING\_BY\_FGFR\_MUTAN  
TOME\_SIGNALING\_BY\_FGFR1\_FUSION\_MUTANTS;REACTOME\_SIGNALING\_BY\_FGFR\_MUTAN

UR2\_CONTAINING\_AMPA\_RECEPTORS

E\_INTERACTIONS;REACTOME\_SIGNALING\_BY\_PDGF;REACTOME\_GPVI\_MEDIATED\_ACTIVAT

ME\_IMMUNE\_SYSTEM;REACTOME\_CYTOKINE\_SIGNALING\_IN\_IMMUNE\_SYSTEM

IATED\_SIGNALLING;REACTOME\_PI3K\_CASCADE

\_LIPOPROTEINS;REACTOME\_FATTY\_ACID\_TRIACYLGLYCEROL\_AND\_KETONE\_BODY\_METAE  
\_LIPOPROTEINS;REACTOME\_FATTY\_ACID\_TRIACYLGLYCEROL\_AND\_KETONE\_BODY\_METAE

ACTOME\_G\_ALPHA\_S\_SIGNALLING\_EVENTS;REACTOME\_GPCR\_LIGAND\_BINDING

S;REACTOME\_PYRUVATE\_METABOLISM;REACTOME\_HEMOSTASIS

A\_POL\_III\_TRANSCRIPTION;REACTOME\_MRNA\_CAPPING;REACTOME\_TRANSCRIPTION\_CO

IE\_SIGNALS\_DEATH\_THROUGH\_JNK;REACTOME\_CELL\_DEATH\_SIGNALLING\_VIA\_NRAGE\_NI  
REACTOME\_P75\_NTR\_RECEPTOR\_MEDIATED\_SIGNALLING;REACTOME\_SIGNALING\_BY\_GPC

IE\_IMMUNE\_SYSTEM;REACTOME\_CYTOKINE\_SIGNALING\_IN\_IMMUNE\_SYSTEM



ACTOME\_GPCR\_DOWNSTREAM\_SIGNALING;REACTOME\_G\_ALPHA\_S\_SIGNALLING\_EVENTS  
MUNE\_SYSTEM;REACTOME\_CYTOKINE\_SIGNALING\_IN\_IMMUNE\_SYSTEM

REACTOME\_SIGNALING\_BY\_GPCR;REACTOME\_INTEGRATION\_OF\_ENERGY\_METABOLISM;R

ISE\_TO\_ELEVATED\_PLATELET\_CYTOSOLIC\_CA2\_;REACTOME\_TRANSCRIPTIONAL\_REGULA

HOMEOSTASIS;REACTOME\_HEMOSTASIS

↓\_COUPLED\_NER\_TC\_NER;REACTOME\_POL\_SWITCHING;REACTOME\_NUCLEOTIDE\_EXCISI  
↓\_COUPLED\_NER\_TC\_NER;REACTOME\_POL\_SWITCHING;REACTOME\_NUCLEOTIDE\_EXCISI  
↓\_COUPLED\_NER\_TC\_NER;REACTOME\_POL\_SWITCHING;REACTOME\_NUCLEOTIDE\_EXCISI

\_EGFR\_IN\_CANCER;REACTOME\_ANTIGEN\_ACTIVATES\_B\_CELL\_RECEPTOR\_LEADING\_TO\_C

GANIC\_ANION\_SLC\_TRANSPORTERS

TIDE1;REACTOME\_REGULATION\_OF\_INSULIN\_SECRETION;REACTOME\_CLASS\_B\_2\_SECRET  
TIDE1;REACTOME\_REGULATION\_OF\_INSULIN\_SECRETION;REACTOME\_CLASS\_B\_2\_SECRET

LIGAND\_BINDING\_RECEPTORS;REACTOME\_CLASS\_A1\_RHODOPSIN\_LIKE\_RECEPTORS;RE/

ME\_G\_ALPHA1213\_SIGNALLING\_EVENTS;REACTOME\_GPCR\_DOWNSTREAM\_SIGNALING

D\_PROCESSING;REACTOME\_CLEAVAGE\_OF\_GROWING\_TRANSCRIPT\_IN\_THE\_TERMINATIO

ADAPTIVE\_IMMUNE\_SYSTEM

;REACTOME\_G\_ALPHA\_S\_SIGNALLING\_EVENTS;REACTOME\_GPCR\_LIGAND\_BINDING

\_OF\_DNA;REACTOME\_MITOTIC\_G1\_G1\_S\_PHASES;REACTOME\_MITOTIC\_M\_M\_G1\_PHASES;

.SUBUNITS;REACTOME\_GABA\_B\_RECEPTOR\_ACTIVATION;REACTOME\_GABA\_RECEPTOR\_A  
.SUBUNITS;REACTOME\_GABA\_B\_RECEPTOR\_ACTIVATION;REACTOME\_GABA\_RECEPTOR\_A

VALING;REACTOME\_G\_ALPHA\_I\_SIGNALLING\_EVENTS;REACTOME\_GPCR\_LIGAND\_BINDING  
PROMOTER;REACTOME\_RNA\_POL\_III\_TRANSCRIPTION\_TERMINATION;REACTOME\_RNA\_POI  
PROMOTER;REACTOME\_RNA\_POL\_III\_TRANSCRIPTION\_TERMINATION;REACTOME\_RNA\_POI

SPHINGOLIPID\_METABOLISM;REACTOME\_POST\_TRANSLATIONAL\_PROTEIN\_MODIFICATION;

\_APOPTOSIS;REACTOME\_APOPTOSIS

REACTOME\_DNA\_REPLICATION;REACTOME\_MITOTIC\_PROMETAPHASE;REACTOME\_MEIOTIC

ME\_G\_ALPHA1213\_SIGNALLING\_EVENTS;REACTOME\_GPCR\_DOWNSTREAM\_SIGNALING

CRIPATIONAL\_REGULATION\_OF\_WHITE\_ADIPOCYTE\_DIFFERENTIATION

IKER\_SEQUENCE\_IS\_REQUIRED\_FOR\_GAG\_SYNTHESIS;REACTOME\_METABOLISM\_OF\_CAR

CCHARIDE\_LINKER\_SEQUENCE\_IS\_REQUIRED\_FOR\_GAG\_SYNTHESIS;REACTOME\_METABC

JCTION\_BY\_L1;REACTOME\_RECYCLING\_PATHWAY\_OF\_L1;REACTOME\_HEMOSTASIS  
JCTION\_BY\_L1;REACTOME\_RECYCLING\_PATHWAY\_OF\_L1;REACTOME\_HEMOSTASIS



IA\_REPLICATION;REACTOME\_MITOTIC\_PROMETAPHASE

C\_CLEAVAGE\_OF\_NOTCH\_RECEPTOR;REACTOME\_SIGNALING\_BY\_NOTCH

.ICATION;REACTOME\_HEMOSTASIS;REACTOME\_IMMUNE\_SYSTEM;REACTOME\_ADAPTIVE\_IF

TRANSPORT

RS;REACTOME\_METAL\_ION\_SLC\_TRANSPORTERS

\_PI3K\_EVENTS\_IN\_ERBB4\_SIGNALING;REACTOME\_PI3K\_EVENTS\_IN\_ERBB2\_SIGNALING;RE

VALING;REACTOME\_GPCR\_LIGAND\_BINDING;REACTOME\_THROMBIN\_SIGNALLING\_THROUC

LATION\_OF\_CELL\_SURFACE\_RECEPTORS\_BY\_RECRUITING\_THEM\_TO\_CLATHRIN\_ADAPTE

\_ING;REACTOME\_SIGNALING\_BY\_ERBB2;REACTOME\_SIGNALING\_BY\_EGFR\_IN\_CANCER;RE

SPHINGOLIPID\_METABOLISM;REACTOME\_POST\_TRANSLATIONAL\_PROTEIN\_MODIFICATION;

ION;REACTOME\_KINESINS;REACTOME\_HEMOSTASIS;REACTOME\_IMMUNE\_SYSTEM;REACTO

ABA\_A\_RECEPTOR\_ACTIVATION;REACTOME\_GABA\_RECEPTOR\_ACTIVATION;REACTOME\_IC  
CTOME\_TAK1\_ACTIVATES\_NFKB\_BY\_PHOSPHORYLATION\_AND\_ACTIVATION\_OF\_IKKS\_COM

TEM;REACTOME\_CYTOKINE\_SIGNALING\_IN\_IMMUNE\_SYSTEM;REACTOME\_CLASS\_I\_MHC\_M

NS

\_DIFFERENTIATION

IDES\_LINKAGE\_TO\_MAPK\_SIGNALING\_FOR\_INTERGRINS\_;REACTOME\_INTEGRIN\_ALPHAIB\_  
CTOME\_IMMUNE\_SYSTEM

REACTOME\_PI\_3K\_CASCADE;REACTOME\_DOWNSTREAM\_SIGNALING\_OF\_ACTIVATED\_FGFI

ACTOME\_SIGNALING\_BY\_GPCR;REACTOME\_AXON\_GUIDANCE;REACTOME\_G\_ALPHA1213\_S  
\_S\_PHASES;REACTOME\_INHIBITION\_OF\_REPLICATION\_INITIATION\_OF\_DAMAGED\_DNA\_BY\_

CTOME\_TAK1\_ACTIVATES\_NFKB\_BY\_PHOSPHORYLATION\_AND\_ACTIVATION\_OF\_IKKS\_COM

ACTOME\_SIGNALING\_BY\_GPCR;REACTOME\_AXON\_GUIDANCE;REACTOME\_G\_ALPHA1213\_S

PLEX\_AND\_EIFS\_AND\_SUBSEQUENT\_BINDING\_TO\_43S;REACTOME\_PEPTIDE\_CHAIN\_ELONG

3;REACTOME\_INTERFERON\_ALPHA\_BETA\_SIGNALING;REACTOME\_INTERFERON\_SIGNALIN

DOWNSTREAM\_SIGNALING;REACTOME\_G\_ALPHA\_I\_SIGNALLING\_EVENTS;REACTOME\_GPCR

ET\_HOMEOSTASIS;REACTOME\_PLATELET\_SENSITIZATION\_BY\_LDL;REACTOME\_DNA\_REPL

ATION



UR2\_CONTAINING\_AMPA\_RECEPTORS

MISSION\_IN\_THE\_POSTSYNAPTIC\_CELL;REACTOME\_PLC\_BETA\_MEDIATED\_EVENTS;REA

TOTIC\_CELL\_CYCLE;REACTOME\_APC\_C\_CDH1\_MEDIATED\_DEGRADATION\_OF\_CDC20\_AND

REACTOME\_IL\_RECEPTOR\_SHC\_SIGNALING;REACTOME\_FACTORS\_INVOLVED\_IN\_MEGAKA

IFKB;REACTOME\_NRIF\_SIGNALS\_CELL\_DEATH\_FROM\_THE\_NUCLEUS;REACTOME\_NFKB\_IS

BOLISM

IKER\_SEQUENCE\_IS\_REQUIRED\_FOR\_GAG\_SYNTHESIS;REACTOME\_METABOLISM\_OF\_CAR

ATED\_VESICLE\_BIOGENESIS;REACTOME\_METABOLISM\_OF\_LIPIDS\_AND\_LIPOPROTEINS

IT\_JUNCTION\_INTERACTIONS;REACTOME\_CELL\_JUNCTION\_ORGANIZATION

;REACTOME\_AMINO\_ACID\_AND\_OLIGOPEPTIDE\_SLC\_TRANSPORTERS

\_PATHWAY;REACTOME\_RECEPTOR\_LIGAND\_BINDING\_INITIATES\_THE\_SECOND\_PROTEOLY

ACTOME\_MITOTIC\_G1\_G1\_S\_PHASES;REACTOME\_E2F\_MEDIATED\_REGULATION\_OF\_DNA\_

ABA\_A\_RECEPTOR\_ACTIVATION;REACTOME\_GABA\_RECEPTOR\_ACTIVATION;REACTOME\_IC

)\_OTHER\_SUGARS\_BILE\_SALTS\_AND\_ORGANIC\_ACIDS\_METAL\_IONS\_AND\_AMINE\_COMPOU

DL\_I\_RNA\_POL\_III\_AND\_MITOCHONDRIAL\_TRANSCRIPTION;REACTOME\_RNA\_POL\_II\_PRE\_T

3\_COUPLING\_AND\_HEAT\_PRODUCTION\_BY\_UNCOUPLING\_PROTEINS\_

SECRETION\_BY\_ACETYLCHOLINE;REACTOME\_ADP\_SIGNALLING\_THROUGH\_P2RY1;REACTOM

\_LIPID\_LINKED\_OLIGOSACCHARIDE\_LLO\_AND\_TRANSFER\_TO\_A\_NASCENT\_PROTEIN

\\_FROM\_THE\_PLASMA\_MEMBRANE;REACTOME\_MHC\_CLASS\_II\_ANTIGEN\_PRESENTATION;f

:ACTOME\_IONOTROPIC\_ACTIVITY\_OF\_KAINATE\_RECEPTORS

M;REACTOME\_A\_TETRASACCHARIDE\_LINKER\_SEQUENCE\_IS\_REQUIRED\_FOR\_GAG\_SYNTI

3;REACTOME\_INTERFERON\_ALPHA\_BETA\_SIGNALING;REACTOME\_INTERFERON\_SIGNALIN

'ATION\_SIGNALING\_AND\_AGGREGATION  
'ATION\_SIGNALING\_AND\_AGGREGATION

LIPIIDS\_AND\_LIPOPROTEINS

DNA\_DAMAGE\_RESPONSE;REACTOME\_REGULATION\_OF\_THE\_FANCONI\_ANEMIA\_PATHWAY

SIGNALING\_BY\_EGFR\_IN\_CANCER;REACTOME\_SHC1\_EVENTS\_IN\_ERBB4\_SIGNALING;REACTOME\_GABA\_A\_RECEPTOR\_CHANNELS

GABA\_A\_RECEPTOR\_ACTIVATION;REACTOME\_GABA\_RECEPTOR\_ACTIVATION;REACTOME\_IC

IMMUNE\_SYSTEM;REACTOME\_TOLL\_RECEPTOR\_CASCADES;REACTOME\_ADAPTIVE\_IMMUNE



ION

SPHINGOLIPID\_METABOLISM;REACTOME\_POST\_TRANSLATIONAL\_PROTEIN\_MODIFICATION;

RT\_OF\_SMALL\_MOLECULES;REACTOME\_MRNA\_PROCESSING;REACTOME\_TRANSPORT\_OF\_

D\_RECYCLING;REACTOME\_SIGNALING\_BY\_INSULIN\_RECEPTOR

IGNALING\_BY\_TGF\_BETA\_RECEPTOR\_COMPLEX

AM\_SIGNALING\_FOR\_NEURITE\_OUT\_GROWTH

\_DIFFERENTIATION

3HLY\_CALCIIUM\_PERMEABLE\_POSTSYNAPTIC\_NICOTINIC\_ACETYLCHOLINE\_RECEPTORS

IATED\_SIGNALLING;REACTOME\_PI3K\_CASCADE  
RANSPORT

ROL\_AND\_KETONE\_BODY\_METABOLISM

ME\_G\_ALPHA1213\_SIGNALLING\_EVENTS;REACTOME\_GPCR\_DOWNSTREAM\_SIGNALING

NG\_BY\_SCF\_KIT;REACTOME\_DEVELOPMENTAL\_BIOLOGY;REACTOME\_SIGNALING\_BY\_ERBE

REACTOME\_METABOLISM\_OF\_RNA;REACTOME\_INFLUENZA\_LIFE\_CYCLE;REACTOME\_INFLUE

\_PI3K\_EVENTS\_IN\_ERBB4\_SIGNALING;REACTOME\_PI3K\_EVENTS\_IN\_ERBB2\_SIGNALING;RE

ACTANTS;REACTOME\_FRS2\_MEDIATED\_CASCADE;REACTOME\_PI\_3K\_CASCADE;REACTOME\_DC

TS;REACTOME\_GPCR\_LIGAND\_BINDING

SIGNALING;REACTOME\_SIGNALING\_BY\_GPCR;REACTOME\_G\_ALPHA1213\_SIGNALLING\_EVENT

DIATED\_RESISTANCE\_TO\_HIV1\_INFECTIION

⟨POSED\_COLLAGEN;REACTOME\_BASIGIN\_INTERACTIONS;REACTOME\_INTEGRIN\_CELL\_SUI

ELS;REACTOME\_INWARDLY\_RECTIFYING\_K\_CHANNELS

TOTIC\_CELL\_CYCLE;REACTOME\_MITOTIC\_M\_M\_G1\_PHASES;REACTOME\_DNA\_REPLICATIO

\_SLC\_TRANSPORTERS

VALING;REACTOME\_GPCR\_LIGAND\_BINDING

NEUROTRANSMITTER\_RECEPTOR\_BINDING\_AND\_DOWNSTREAM\_TRANSMISSION\_IN\_THE\_

CTOME\_TAK1\_ACTIVATES\_NFKB\_BY\_PHOSPHORYLATION\_AND\_ACTIVATION\_OF\_IKKS\_COM

KERATIN\_METABOLISM;REACTOME\_GLYCOSAMINOGLYCAN\_METABOLISM;REACTOME\_ME1

;NALING;REACTOME\_INTERFERON\_ALPHA\_BETA\_SIGNALING;REACTOME\_REGULATION\_OF

ME\_G\_ALPHA1213\_SIGNALLING\_EVENTS;REACTOME\_GPCR\_DOWNSTREAM\_SIGNALING

ME\_P75\_NTR\_RECEPTOR\_MEDIATED\_SIGNALLING;REACTOME\_SIGNALING\_BY\_GPCR;REAC

HESES\_OF\_DNA;REACTOME\_MITOTIC\_G1\_G1\_S\_PHASES;REACTOME\_MITOTIC\_M\_M\_G1\_PH.

SION

CELL\_RECEPTOR\_BCR;REACTOME\_NGF\_SIGNALLING\_VIA\_TRKA\_FROM\_THE\_PLASMA\_MEM

EINS;REACTOME\_3\_UTR\_MEDIATED\_TRANSLATIONAL\_REGULATION





:RIPTION;REACTOME\_NOTCH\_HLH\_TRANSCRIPTION\_PATHWAY;REACTOME\_TRANSCRIPTIC

\_MATURE\_MRNA\_DERIVED\_FROM\_AN\_INTRONLESS\_TRANSCRIPT;REACTOME\_SLC\_MEDIAT

G\_BY\_GPCR;REACTOME\_OPIOID\_SIGNALLING;REACTOME\_CA\_DEPENDENT\_EVENTS;REAC  
\_SIGNALING\_BY\_FGFR\_IN\_DISEASE;REACTOME\_NUCLEAR\_EVENTS\_KINASE\_AND\_TRANSCI



\_ACTIVATED\_AND\_SIGNALS\_SURVIVAL;REACTOME\_CELL\_DEATH\_SIGNALLING\_VIA\_NRAGE

IDES;REACTOME\_AMINO\_ACID\_AND\_OLIGOPEPTIDE\_SLC\_TRANSPORTERS



.LING;REACTOME\_CA\_DEPENDENT\_EVENTS;REACTOME\_DARPP\_32\_EVENTS;REACTOME\_F

3E\_OF\_GROWING\_TRANSCRIPT\_IN\_THE\_TERMINATION\_REGION\_

\_THE\_B\_CELL\_RECEPTOR\_BCR;REACTOME\_INSULIN\_RECEPTOR\_SIGNALLING\_CASCADE;R  
\_THE\_B\_CELL\_RECEPTOR\_BCR;REACTOME\_INSULIN\_RECEPTOR\_SIGNALLING\_CASCADE;R

NTS;REACTOME\_CDC6\_ASSOCIATION\_WITH\_THE\_ORC\_ORIGIN\_COMPLEX;REACTOME\_M\_C

ANSCRIPTION\_PATHWAY;REACTOME\_METABOLISM\_OF\_LIPIDS\_AND\_LIPOPROTEINS;REAC

ACTOME\_INSULIN\_RECEPTOR\_SIGNALLING\_CASCADE;REACTOME\_CELL\_SURFACE\_INTERA





ETABOLISM\_OF\_LIPIDS\_AND\_LIPOPROTEINS;REACTOME\_FATTY\_ACID\_TRIACYLGLYCEROL\_  
\_TLR7\_8\_OR\_9\_ACTIVATION;REACTOME\_ADVANCED\_GLYCOSYLATION\_ENDPRODUCT\_REC



JS\_ANIONS\_AND\_AMINO\_ACIDS\_OLIGOPEPTIDES;REACTOME\_AMINO\_ACID\_AND\_OLIGOPEF



ROTEINS;REACTOME\_HORMONE\_SENSITIVE\_LIPASE\_HSL\_MEDIATED\_TRIACYLGLYCEROL\_

ACTOME\_INSULIN\_RECEPTOR\_SIGNALLING\_CASCADE;REACTOME\_CELL\_SURFACE\_INTER/  
ACTOME\_INSULIN\_RECEPTOR\_SIGNALLING\_CASCADE;REACTOME\_CELL\_SURFACE\_INTER/

G;REACTOME\_IMMUNE\_SYSTEM;REACTOME\_ADAPTIVE\_IMMUNE\_SYSTEM;REACTOME\_CYT

E\_REGULATION\_OF\_GLUCOKINASE\_BY\_GLUCOKINASE\_REGULATORY\_PROTEIN

\_CELL;REACTOME\_PLC\_BETA\_MEDIATED\_EVENTS;REACTOME\_G\_PROTEIN\_ACTIVATION;R

\_OF\_INSULIN\_SECRETION\_BY\_ADRENALINE\_NORADRENALINE

ACTOME\_DOWNSTREAM\_SIGNALING\_EVENTS\_OF\_B\_CELL\_RECEPTOR\_BCR;REACTOME\_S  
IBRANE;REACTOME\_SIGNALING\_BY\_FGFR\_IN\_DISEASE;REACTOME\_GASTRIN\_CREB\_SIGNA





ACTOME\_GPCR\_DOWNSTREAM\_SIGNALING;REACTOME\_G\_ALPHA\_S\_SIGNALLING\_EVENTS;RE  
POLISM

BY\_KSRP

.IZATION\_OF\_MRNA\_BY\_BRF1;REACTOME\_REGULATION\_OF\_MRNA\_STABILITY\_BY\_PROTEIN

AL\_SYNAPSES;REACTOME\_NEURONAL\_SYSTEM;REACTOME\_SIGNALING\_BY\_GPCR;REACTO

REACTOME\_ASSEMBLY\_OF\_THE\_PRE\_REPLICATIVE\_COMPLEX;REACTOME\_DNA\_REPLICAT

MEDIATED\_ANTIGEN\_PROCESSING\_PRESENTATION



CHECKPOINTS;REACTOME\_G2\_M\_DNA\_DAMAGE\_CHECKPOINT  
G;REACTOME\_HEMOSTASIS;REACTOME\_PLATELET\_ACTIVATION\_SIGNALING\_AND\_AGGREGATION

TRANSPORT;REACTOME\_TRANSPORT\_OF\_GLUCOSE\_AND\_OTHER\_SUGARS\_BILE\_SALTS\_AND

HOME\_MAINTENANCE;REACTOME\_GLOBAL\_GENOMIC\_NER\_GG\_NER;REACTOME\_LAGGING\_S

CEROL\_AND\_KETONE\_BODY\_METABOLISM;REACTOME\_CIRCADIAN\_CLOCK;REACTOME\_TR

OTIDE\_EXCISION\_REPAIR;REACTOME\_FORMATION\_OF\_RNA\_POL\_II\_ELONGATION\_COMPLE

ADATION;REACTOME\_GLYCOSAMINOGLYCAN\_METABOLISM;REACTOME\_SPHINGOLIPID\_M  
ADATION;REACTOME\_GLYCOSAMINOGLYCAN\_METABOLISM;REACTOME\_SPHINGOLIPID\_M

ME\_MEIOTIC\_RECOMBINATION;REACTOME\_MEIOTIC\_SYNAPSIS;REACTOME\_AMYLOIDS;REA

REACTOME\_TRANSFERRIN\_ENDOCYTOSIS\_AND\_RECYCLING;REACTOME\_SIGNALING\_BY\_IP

CTION\_OF\_IFN\_ALPHA\_BETA\_PATHWAYS;REACTOME\_HEMOSTASIS;REACTOME\_INNATE\_I

GNALING\_BY\_CBL;REACTOME\_IL\_3\_5\_AND\_GM-CSF\_SIGNALING;REACTOME\_IMMUNE\_SYS



ALING\_IN\_IMMUNE\_SYSTEM

.ISM\_OF\_LIPIDS\_AND\_LIPOPROTEINS

R\_CASCADES;REACTOME\_ADAPTIVE\_IMMUNE\_SYSTEM

JLIN\_RECEPTOR\_SIGNALLING\_CASCADE;REACTOME\_ARMS\_MEDIATED\_ACTIVATION;REACT

EACTOME\_PRESYNAPTIC\_NICOTINIC\_ACETYLCHOLINE\_RECEPTORS

SCADE;REACTOME\_MAPK\_TARGETS\_NUCLEAR\_EVENTS\_MEDIATED\_BY\_MAP\_KINASES;RE.

L\_III\_CHAIN\_ELONGATION

DIFFERENTIATION

TRANSCRIPTION\_PATHWAY;REACTOME\_NUCLEAR\_RECEPTOR\_TRANSCRIPTION\_PATHWAY;R

ISPORTERS

POSTSYNAPTIC\_CELL;REACTOME\_PLC\_BETA\_MEDIATED\_EVENTS;REACTOME\_G\_ALPHA\_C

ANSCRIPTION\_PATHWAY;REACTOME\_METABOLISM\_OF\_LIPIDS\_AND\_LIPOPROTEINS;REAC  
ANSCRIPTION\_PATHWAY;REACTOME\_METABOLISM\_OF\_LIPIDS\_AND\_LIPOPROTEINS;REAC

V\_REGULATES\_TRANSCRIPTION;REACTOME\_CIRCADIAN\_REPRESSION\_OF\_EXPRESSION\_E

OME\_GPCR\_DOWNSTREAM\_SIGNALING;REACTOME\_CELL\_EXTRACELLULAR\_MATRIX\_INTEF

\_OTHER\_APC\_C\_CDH1\_TARGETED\_PROTEINS\_IN\_LATE\_MITOSIS\_EARLY\_G1;REACTOME\_A

\_THE\_B\_CELL\_RECEPTOR\_BCR;REACTOME\_NGF\_SIGNALLING\_VIA\_TRKA\_FROM\_THE\_PLAS



)\_LIPOPROTEINS

ANSCRIPTION\_PATHWAY;REACTOME\_METABOLISM\_OF\_LIPIDS\_AND\_LIPOPROTEINS;REAC

JKINE\_SIGNALING\_IN\_IMMUNE\_SYSTEM

\_THE\_B\_CELL\_RECEPTOR\_BCR;REACTOME\_NGF\_SIGNALLING\_VIA\_TRKA\_FROM\_THE\_PLAS

DS\_AND\_LIPOPROTEINS;REACTOME\_METABOLISM\_OF\_CARBOHYDRATES;REACTOME\_LIPII  
DS\_AND\_LIPOPROTEINS;REACTOME\_METABOLISM\_OF\_CARBOHYDRATES;REACTOME\_LIPII

ACTOME\_TRANSMISSION\_ACROSS\_CHEMICAL\_SYNAPSES;REACTOME\_NEURONAL\_SYSTE

TABOLISM\_OF\_CARBOHYDRATES

TABOLISM\_OF\_CARBOHYDRATES

IGNALING;REACTOME\_PHOSPHORYLATION\_OF\_CD3\_AND\_TCR\_ZETA\_CHAINS;REACTOME\_T

;REACTOME\_METABOLISM\_OF\_LIPIDS\_AND\_LIPOPROTEINS;REACTOME\_FATTY\_ACID\_TRIA

\_IFNA\_SIGNALING;REACTOME\_INTERFERON\_SIGNALING;REACTOME\_IL\_2\_SIGNALING;REAC

\_GROWTH\_CONE\_COLLAPSE

'TIC\_CLEAVAGE\_OF\_NOTCH\_RECEPTOR;REACTOME\_SIGNALING\_BY\_NOTCH  
'TIC\_CLEAVAGE\_OF\_NOTCH\_RECEPTOR;REACTOME\_SIGNALING\_BY\_NOTCH

L\_III\_CHAIN\_ELONGATION

;SIGNALLING\_EVENTS;REACTOME\_GPCR\_DOWNSTREAM\_SIGNALING;REACTOME\_SEMA4D\_I

\_MATURE\_MRNA\_DERIVED\_FROM\_AN\_INTRONLESS\_TRANSCRIPT;REACTOME\_SLC\_MEDIA1

REACTOME\_DOWNSTREAM\_SIGNALING\_EVENTS\_OF\_B\_CELL\_RECEPTOR\_BCR;REACTOME\_

ME\_P75\_NTR\_RECEPTOR\_MEDIATED\_SIGNALLING;REACTOME\_RECEPTOR\_LIGAND\_BINDIN

TRANSCRIPTION\_PATHWAY;REACTOME\_METABOLISM\_OF\_LIPIDS\_AND\_LIPOPROTEINS;REAC

ITEM;REACTOME\_TOLL\_RECEPTOR\_CASCADES;REACTOME\_CYTOKINE\_SIGNALING\_IN\_IMM

;LOT\_CLOTTING\_CASCADE;REACTOME\_POST\_TRANSLATIONAL\_PROTEIN\_MODIFICATION;F



ACTOME\_HEMOSTASIS;REACTOME\_IMMUNE\_SYSTEM;REACTOME\_ADAPTIVE\_IMMUNE\_SYSTEM;  
REACTOME\_PRESYNAPTIC\_NICOTINIC\_ACETYLCHOLINE\_RECEPTORS

HEMOSTASIS;REACTOME\_IMMUNE\_SYSTEM;REACTOME\_ADAPTIVE\_IMMUNE\_SYSTEM;REACTOME  
REACTOME\_DOWNSTREAM\_SIGNAL\_TRANSDUCTION;REACTOME\_SIGNALING\_BY\_ILS;REACTOME

ACTOME\_TRANSPORTERS

REACTOME\_IMMUNE\_SYSTEM;REACTOME\_CYTOKINE\_SIGNALING\_IN\_IMMUNE\_SYSTEM;REACTOME

ND\_AMINE\_COMPOUNDS;REACTOME\_NA\_CL\_DEPENDENT\_NEUROTRANSMITTER\_TRANSPC

OME\_ARMS\_MEDIATED\_ACTIVATION;REACTOME\_PROLONGED\_ERK\_ACTIVATION\_EVENTS;

CHECKPOINTS;REACTOME\_G2\_M\_DNA\_DAMAGE\_CHECKPOINT

|\_PROTEASOME\_DEGRADATION  
|\_PROTEASOME\_DEGRADATION

ION\_CHANNEL\_TRANSPORT;REACTOME\_LIGAND\_GATED\_ION\_CHANNEL\_TRANSPORT

LING\_BY\_GPCR;REACTOME\_AXON\_GUIDANCE;REACTOME\_G\_ALPHA\_Q\_SIGNALLING\_EVEN  
LING\_BY\_GPCR;REACTOME\_AXON\_GUIDANCE;REACTOME\_G\_ALPHA\_Q\_SIGNALLING\_EVEN

NALING\_BY\_INSULIN\_RECEPTOR;REACTOME\_PI3K\_CASCADE

TS\_IN\_ERBB2\_SIGNALING;REACTOME\_ANTIGEN\_ACTIVATES\_B\_CELL\_RECEPTOR\_LEADING

OLISM\_OF\_CARBOHYDRATES

;REACTOME\_METABOLISM\_OF\_LIPIDS\_AND\_LIPOPOTEINS

)E;REACTOME\_SHC\_MEDIATED\_CASCADE;REACTOME\_SIGNALING\_BY\_INSULIN\_RECEPTOR  
)E;REACTOME\_SHC\_MEDIATED\_CASCADE;REACTOME\_SIGNALING\_BY\_INSULIN\_RECEPTOR  
)E;REACTOME\_SHC\_MEDIATED\_CASCADE;REACTOME\_SIGNALING\_BY\_INSULIN\_RECEPTOR

:NZA\_VIRAL\_RNA\_TRANSCRIPTION\_AND\_REPLICATION;REACTOME\_NONSENSE\_MEDIATED.

IBRANE;REACTOME\_SIGNALING\_BY\_FGFR\_IN\_DISEASE;REACTOME\_GASTRIN\_CREB\_SIGNA

ENZA\_VIRAL\_RNA\_TRANSCRIPTION\_AND\_REPLICATION;REACTOME\_NONSENSE\_MEDIATED.





G\_BY\_GPCR;REACTOME\_INTEGRATION\_OF\_ENERGY\_METABOLISM;REACTOME\_OPIOID\_SI

TION\_CASCADE;REACTOME\_AXON\_GUIDANCE;REACTOME\_NCAM1\_INTERACTIONS;REACTC

ACTIVATION\_OF\_NF\_KAPPAB\_IN\_B\_CELLS;REACTOME\_SIGNALING\_BY\_THE\_B\_CELL\_RECEI  
VTS;REACTOME\_CDC6\_ASSOCIATION\_WITH\_THE\_ORC\_ORIGIN\_COMPLEX;REACTOME\_M\_C

;REACTOME\_METABOLISM\_OF\_LIPIDS\_AND\_LIPOPROTEINS;REACTOME\_FATTY\_ACID\_TRIA  
;REACTOME\_METABOLISM\_OF\_LIPIDS\_AND\_LIPOPROTEINS;REACTOME\_FATTY\_ACID\_TRIA

;E;REACTOME\_NCAM\_SIGNALING\_FOR\_NEURITE\_OUT\_GROWTH;REACTOME\_FRS2\_MEDIAT  
;E;REACTOME\_NCAM\_SIGNALING\_FOR\_NEURITE\_OUT\_GROWTH;REACTOME\_FRS2\_MEDIAT

↓S\_ANIONS\_AND\_AMINO\_ACIDS\_OLIGOPEPTIDES;REACTOME\_AMINO\_ACID\_AND\_OLIGOPEF

ENTS

\_THE\_B\_CELL\_RECEPTOR\_BCR;REACTOME\_NGF\_SIGNALLING\_VIA\_TRKA\_FROM\_THE\_PLAS

:\_CYCLE;REACTOME\_NOREPINEPHRINE\_NEUROTRANSMITTER\_RELEASE\_CYCLE;REACTOM

\_AND\_ANKYRINS;REACTOME\_NEPHRIN\_INTERACTIONS;REACTOME\_APOPTOSIS;REACTOME  
\_AND\_ANKYRINS;REACTOME\_NEPHRIN\_INTERACTIONS;REACTOME\_APOPTOSIS;REACTOME  
\_AND\_ANKYRINS;REACTOME\_NEPHRIN\_INTERACTIONS;REACTOME\_APOPTOSIS;REACTOME  
\_AND\_ANKYRINS;REACTOME\_NEPHRIN\_INTERACTIONS;REACTOME\_APOPTOSIS;REACTOME

GNALING\_BY\_CBL;REACTOME\_IL\_3\_5\_AND\_GM-CSF\_SIGNALING;REACTOME\_IMMUNE\_SYS

ALING\_AND\_AGGREGATION

PROTEINS



SIGNALING\_IN\_IMMUNE\_SYSTEM

ACTIVATION\_OF\_NF\_KAPPAB\_IN\_B\_CELLS;REACTOME\_SIGNALING\_BY\_THE\_B\_CELL\_RECEI

OME\_RETROGRADE\_NEUROTROPHIN\_SIGNALLING;REACTOME\_EGFR\_DOWNREGULATION;

M;REACTOME\_CIRCADIAN\_CLOCK

:RECEPTOR;REACTOME\_HEMOSTASIS;REACTOME\_PI3K\_CASCADE

STREAM\_SIGNALING;REACTOME\_G\_ALPHA\_I\_SIGNALLING\_EVENTS;REACTOME\_TAK1\_ACTI  
TERS

\_THE\_B\_CELL\_RECEPTOR\_BCR;REACTOME\_NGF\_SIGNALLING\_VIA\_TRKA\_FROM\_THE\_PLAS

ASES;REACTOME\_CHROMOSOME\_MAINTENANCE;REACTOME\_LAGGING\_STRAND\_SYNTHESIS;

REACTOME\_LIPID\_DIGESTION\_MOBILIZATION\_AND\_TRANSPORT;REACTOME\_SIGNALING\_BYPASSING\_TGFBR1;

ON\_OF\_APOBEC3G;

WAY;REACTOME\_FANCONI\_ANEMIA\_PATHWAY;REACTOME\_DOUBLE\_STRAND\_BREAK\_REPAIR;

SIGNALLING\_EVENTS;REACTOME\_GPCR\_DOWNSTREAM\_SIGNALING;REACTOME\_SEMA4D\_SIGNALING;

SIGNALLING\_EVENTS;REACTOME\_GPCR\_DOWNSTREAM\_SIGNALING;REACTOME\_SEMA4D\_I

ERATION\_OF\_SECOND\_MESSENGER\_MOLECULES;REACTOME\_PD1\_SIGNALING;REACTOME

:\_TRANSPORT\_OF\_ORGANIC\_ANIONS

IG\_BY\_GPCR;REACTOME\_INTEGRATION\_OF\_ENERGY\_METABOLISM;REACTOME\_OPIOID\_SI



OME\_MAINTENANCE;REACTOME\_GLOBAL\_GENOMIC\_NER\_GG\_NER;REACTOME\_LAGGING\_ξ

DS\_OLIGOPEPTIDES;REACTOME\_AMINO\_ACID\_AND\_OLIGOPEPTIDE\_SLC\_TRANSPORTERS;

ACTOME\_PI3K\_EVENTS\_IN\_ERBB4\_SIGNALING;REACTOME\_PI3K\_EVENTS\_IN\_ERBB2\_SIGNA

POSTSYNAPTIC\_CELL;REACTOME\_PLC\_BETA\_MEDIATED\_EVENTS;REACTOME\_G\_ALPHA\_C



3LYCOSYLPHOSPHATIDYLINOSITOL\_GPI

INZA\_VIRAL\_RNA\_TRANSCRIPTION\_AND\_REPLICATION;REACTOME\_NONSENSE\_MEDIATED.

SION\_AND\_PROCESSING;REACTOME\_NOTCH1\_INTRACELLULAR\_DOMAIN\_REGULATES\_TR  
SION\_AND\_PROCESSING;REACTOME\_NOTCH1\_INTRACELLULAR\_DOMAIN\_REGULATES\_TR  
SION\_AND\_PROCESSING;REACTOME\_NOTCH1\_INTRACELLULAR\_DOMAIN\_REGULATES\_TR  
G\_BY\_GPCR;REACTOME\_INTEGRATION\_OF\_ENERGY\_METABOLISM;REACTOME\_OPIOID\_SI

CH;REACTOME\_HEMOSTASIS

\_MATURE\_MRNA\_DERIVED\_FROM\_AN\_INTRONLESS\_TRANSCRIPT;REACTOME\_SLC\_MEDIAT

\_MATURE\_MRNA\_DERIVED\_FROM\_AN\_INTRONLESS\_TRANSCRIPT;REACTOME\_SLC\_MEDIAT

ALING\_AND\_AGGREGATION

\_SYSTEM;REACTOME\_PLATELET\_ACTIVATION\_SIGNALING\_AND\_AGGREGATION

IA\_PROCESSING;REACTOME\_MRNA\_SPLICING;REACTOME\_MRNA\_SPLICING\_MINOR\_PATHV  
ACTOME\_METABOLISM\_OF\_LIPIDS\_AND\_LIPOPROTEINS;REACTOME\_HEMOSTASIS;REACTO

ME\_CIRCADIAN\_REPRESSION\_OF\_EXPRESSION\_BY\_REV\_ERBA;REACTOME\_SIGNALING\_BY  
ME\_CIRCADIAN\_REPRESSION\_OF\_EXPRESSION\_BY\_REV\_ERBA;REACTOME\_SIGNALING\_BY

YD88\_MAL\_CASCADE\_INITIATED\_ON\_PLASMA\_MEMBRANE;REACTOME\_INNATE\_IMMUNE\_S

OME\_RETROGRADE\_NEUROTROPHIN\_SIGNALLING;REACTOME\_EGFR\_DOWNREGULATION;

ENZA\_VIRAL\_RNA\_TRANSCRIPTION\_AND\_REPLICATION;REACTOME\_NONSENSE\_MEDIATED

CELL\_MIGRATION\_AND\_GROWTH\_CONE\_COLLAPSE

REACTOME\_SIGNALING\_BY\_PDGF;REACTOME\_DOWNSTREAM\_SIGNAL\_TRANSDUCTION;  
REACTOME\_SIGNALING\_BY\_PDGF;REACTOME\_DOWNSTREAM\_SIGNAL\_TRANSDUCTION;  
REACTOME\_SIGNALING\_BY\_PDGF;REACTOME\_DOWNSTREAM\_SIGNAL\_TRANSDUCTION;

REACTOME\_AXON\_GUIDANCE;REACTOME\_NCAM1\_INTERACTIONS;REACTOME

3OLISM  
3OLISM

JPLED\_NER\_TC\_NER;REACTOME\_RNA\_POL\_II\_TRANSCRIPTION\_PRE\_INITIATION\_AND\_PRC

RIF\_AND\_NADE;REACTOME\_P75\_NTR\_RECEPTOR\_MEDIATED\_SIGNALLING;REACTOME\_SIG  
CR;REACTOME\_G\_ALPHA1213\_SIGNALLING\_EVENTS;REACTOME\_GPCR\_DOWNSTREAM\_SIC



;REACTOME\_GPCR\_LIGAND\_BINDING

EACTOME\_CELL\_CYCLE\_MITOTIC;REACTOME\_GLUCONEOGENESIS;REACTOME\_OPIOID\_SI

TION\_OF\_WHITE\_ADIPOCYTE\_DIFFERENTIATION;REACTOME\_HEMOSTASIS;REACTOME\_SIC

ON\_REPAIR;REACTOME\_REPAIR\_SYNTHESIS\_FOR\_GAP\_FILLING\_BY\_DNA\_POL\_IN\_TC\_NER  
ON\_REPAIR;REACTOME\_REPAIR\_SYNTHESIS\_FOR\_GAP\_FILLING\_BY\_DNA\_POL\_IN\_TC\_NER  
ON\_REPAIR;REACTOME\_REPAIR\_SYNTHESIS\_FOR\_GAP\_FILLING\_BY\_DNA\_POL\_IN\_TC\_NER



IN\_FAMILY\_RECEPTORS;REACTOME\_GLUCAGON\_TYPE\_LIGAND\_RECEPTORS;REACTOME\_

ACTOME\_G\_ALPHA\_Q\_SIGNALLING\_EVENTS;REACTOME\_GPCR\_DOWNSTREAM\_SIGNALING

N\_REGION\_

REACTOME\_ASSEMBLY\_OF\_THE\_PRE\_REPLICATIVE\_COMPLEX;REACTOME\_DNA\_REPLICAT

.CTIVATION;REACTOME\_POTASSIUM\_CHANNELS;REACTOME\_INWARDLY\_RECTIFYING\_K\_CI  
.CTIVATION;REACTOME\_POTASSIUM\_CHANNELS;REACTOME\_INWARDLY\_RECTIFYING\_K\_CI

L\_III\_CHAIN\_ELONGATION  
L\_III\_CHAIN\_ELONGATION

;REACTOME\_METABOLISM\_OF\_LIPIDS\_AND\_LIOPROTEINS

3\_SYNOPSIS

BOHYDRATES

OLISM\_OF\_CARBOHYDRATES



VMUNE\_SYSTEM

ACTOME\_INSULIN\_RECEPTOR\_SIGNALLING\_CASCADE;REACTOME\_CELL\_SURFACE\_INTER/

PH\_PROTEINASE\_ACTIVATED\_RECEPTORS\_PARS;REACTOME\_HEMOSTASIS;REACTOME\_PL

RS;REACTOME\_IMMUNOREGULATORY\_INTERACTIONS\_BETWEEN\_A\_LYMPHOID\_AND\_A\_NC

ACTOME\_PI3K\_EVENTS\_IN\_ERBB4\_SIGNALING;REACTOME\_PI3K\_EVENTS\_IN\_ERBB2\_SIGNA

;REACTOME\_METABOLISM\_OF\_LIPIDS\_AND\_LIPOPROTEINS

OME\_ADAPTIVE\_IMMUNE\_SYSTEM

ION\_CHANNEL\_TRANSPORT;REACTOME\_LIGAND\_GATED\_ION\_CHANNEL\_TRANSPORT  
MPLEX;REACTOME\_MAP\_KINASE\_ACTIVATION\_IN\_TLR\_CASCADE;REACTOME\_JNK\_C\_JUN\_k

MEDIATED\_ANTIGEN\_PROCESSING\_PRESENTATION

\_BETA3\_SIGNALING;REACTOME\_AXON\_GUIDANCE;REACTOME\_NCAM\_SIGNALING\_FOR\_NE

R;REACTOME\_PHOSPHOLIPASE\_C\_MEDIATED\_CASCADE;REACTOME\_SHC\_MEDIATED\_CAS

SIGNALLING\_EVENTS;REACTOME\_GPCR\_DOWNSTREAM\_SIGNALING;REACTOME\_SEMA4D\_I

RB1\_E2F1;REACTOME\_DNA\_REPLICATION;REACTOME\_E2F\_MEDIATED\_REGULATION\_OF\_C

MAPK1;REACTOME\_MAP\_KINASE\_ACTIVATION\_IN\_TLR\_CASCADE;REACTOME\_JNK\_C\_JUN\_PATHWAY

SIGNALING\_EVENTS;REACTOME\_GPCR\_DOWNSTREAM\_SIGNALING;REACTOME\_ACTIVATION\_OF\_MAPK1

ATION;REACTOME\_METABOLISM\_OF\_PROTEINS;REACTOME\_3\_UTR\_MEDIATED\_TRANSLA

G;REACTOME\_IMMUNE\_SYSTEM;REACTOME\_ADAPTIVE\_IMMUNE\_SYSTEM;REACTOME\_CYT

R\_LIGAND\_BINDING

ICATION;REACTOME\_HEMOSTASIS;REACTOME\_MITOTIC\_PROMETAPHASE;REACTOME\_IMM



ACTOME\_G\_PROTEIN\_ACTIVATION;REACTOME\_GPCR\_DOWNSTREAM\_SIGNALING;REACTOM

OTHER\_APC\_C\_CDH1\_TARGETED\_PROTEINS\_IN\_LATE\_MITOSIS\_EARLY\_G1;REACTOME\_A

RYOCYTE\_DEVELOPMENT\_AND\_PLATELET\_PRODUCTION;REACTOME\_REGULATION\_OF\_IFI

\_ACTIVATED\_AND\_SIGNALS\_SURVIVAL;REACTOME\_CELL\_DEATH\_SIGNALLING\_VIA\_NRAGE

:BOHYDRATES





ACTIVATION\_OF\_NOTCH\_SIGNALING\_PATHWAY;REACTOME\_SIGNALING\_BY\_NOTCH

REPLICATION;REACTOME\_G1\_S\_SPECIFIC\_TRANSCRIPTION

ION\_CHANNEL\_TRANSPORT;REACTOME\_LIGAND\_GATED\_ION\_CHANNEL\_TRANSPORT

TRANSPORT;REACTOME\_AMINE\_COMPOUND\_SLC\_TRANSPORTERS;REACTOME\_METABOLISM\_OF

TRANSCRIPTION\_EVENTS;REACTOME\_RNA\_POL\_III\_TRANSCRIPTION\_INITIATION\_FROM\_TYF

ACTIVATION\_OF\_GPCR\_DOWNSTREAM\_SIGNALING;REACTOME\_SIGNAL\_AMPLIFICATION;REACTOME\_THI

REACTOME\_RETROGRADE\_NEUROTROPHIN\_SIGNALLING;REACTOME\_EGFR\_DOWNREGUL

-ESIS;REACTOME\_AXON\_GUIDANCE;REACTOME\_ACTIVATION\_OF\_RAC;REACTOME\_SIGNAL

G;REACTOME\_IMMUNE\_SYSTEM;REACTOME\_ADAPTIVE\_IMMUNE\_SYSTEM;REACTOME\_CYT

WAY;REACTOME\_FANCONI\_ANEMIA\_PATHWAY;REACTOME\_DOUBLE\_STRAND\_BREAK\_REP.

ACTOME\_DOWNSTREAM\_SIGNALING\_EVENTS\_OF\_B\_CELL\_RECEPTOR\_BCR;REACTOME\_S

ION\_CHANNEL\_TRANSPORT;REACTOME\_LIGAND\_GATED\_ION\_CHANNEL\_TRANSPORT

\_SYSTEM;REACTOME\_PLATELET\_ACTIVATION\_SIGNALING\_AND\_AGGREGATION



;REACTOME\_METABOLISM\_OF\_LIPIDS\_AND\_LIOPROTEINS

\_MATURE\_MRNA\_DERIVED\_FROM\_AN\_INTRONLESS\_TRANSCRIPT;REACTOME\_SLC\_MEDIA1



ENZA\_VIRAL\_RNA\_TRANSCRIPTION\_AND\_REPLICATION;REACTOME\_NONSENSE\_MEDIATED.

ACTOME\_INSULIN\_RECEPTOR\_SIGNALLING\_CASCADE;REACTOME\_CELL\_SURFACE\_INTERA

DOWNSTREAM\_SIGNALING\_OF\_ACTIVATED\_FGFR;REACTOME\_PHOSPHOLIPASE\_C\_MEDIATE

TS;REACTOME\_GPCR\_DOWNSTREAM\_SIGNALING;REACTOME\_METABOLISM\_OF\_LIPIDS\_AN

RFACE\_INTERACTIONS;REACTOME\_AXON\_GUIDANCE;REACTOME\_OTHER\_SEMAPHORIN\_IN

N;REACTOME\_APC\_C\_CDC20\_MEDIATED\_DEGRADATION\_OF\_MITOTIC\_PROTEINS;REACTOI

POSTSYNAPTIC\_CELL;REACTOME\_PLC\_BETA\_MEDIATED\_EVENTS;REACTOME\_G\_ALPHA\_C

MAPK1;REACTOME\_MAP\_KINASE\_ACTIVATION\_IN\_TLR\_CASCADE;REACTOME\_JNK\_C\_JUN\_K

ABOLISM\_OF\_PROTEINS;REACTOME\_POST\_TRANSLATIONAL\_PROTEIN\_MODIFICATION;RE

\_IFNA\_SIGNALING;REACTOME\_INTERFERON\_SIGNALING;REACTOME\_IL\_2\_SIGNALING;REA

CTOME\_NEUROTRANSMITTER\_RECEPTOR\_BINDING\_AND\_DOWNSTREAM\_TRANSMISSION\_

ASES;REACTOME\_CHROMOSOME\_MAINTENANCE;REACTOME\_LAGGING\_STRAND\_SYNTHE:

IBRANE;REACTOME\_SIGNALING\_BY\_FGFR\_IN\_DISEASE;REACTOME\_GASTRIN\_CREB\_SIGNA





IN;REACTOME\_RNA\_POL\_I\_RNA\_POL\_III\_AND\_MITOCHONDRIAL\_TRANSCRIPTION;REACTOM

ED\_TRANSMEMBRANE\_TRANSPORT;REACTOME\_GLUCOSE\_TRANSPORT;REACTOME\_MET

TOME\_NEUROTRANSMITTER\_RECEPTOR\_BINDING\_AND\_DOWNSTREAM\_TRANSMISSION\_I  
RIPTION\_FACTOR\_ACTIVATION;REACTOME\_ERKS\_ARE\_INACTIVATED;REACTOME\_ERK\_MAI



\_NRIF\_AND\_NADE;REACTOME\_P75\_NTR\_RECEPTOR\_MEDIATED\_SIGNALLING;REACTOME\_



PLC\_BETA\_MEDIATED\_EVENTS;REACTOME\_PKA\_MEDIATED\_PHOSPHORYLATION\_OF\_CREB

EACTOME\_NGF\_SIGNALLING\_VIA\_TRKA\_FROM\_THE\_PLASMA\_MEMBRANE;REACTOME\_SIG  
EACTOME\_NGF\_SIGNALLING\_VIA\_TRKA\_FROM\_THE\_PLASMA\_MEMBRANE;REACTOME\_SIG

S1\_TRANSITION;REACTOME\_G1\_S\_TRANSITION;REACTOME\_CDT1\_ASSOCIATION\_WITH\_TH

TOME\_FATTY\_ACID\_TRIACYLGLYCEROL\_AND\_KETONE\_BODY\_METABOLISM;REACTOME\_CI

ACTIONS\_AT\_THE\_VASCULAR\_WALL;REACTOME\_NGF\_SIGNALLING\_VIA\_TRKA\_FROM\_THE\_





.AND\_KETONE\_BODY\_METABOLISM;REACTOME\_TRANSCRIPTIONAL\_REGULATION\_OF\_WHI  
EPTOR\_SIGNALING;REACTOME\_NFKB\_AND\_MAP\_KINASES\_ACTIVATION\_MEDIATED\_BY\_TLI



PTIDE\_SLC\_TRANSPORTERS



HYDROLYSIS;REACTOME\_LIPID\_DIGESTION\_MOBILIZATION\_AND\_TRANSPORT;REACTOME\_

ACTIONS\_AT\_THE\_VASCULAR\_WALL;REACTOME\_NGF\_SIGNALLING\_VIA\_TRKA\_FROM\_THE\_

OKINE\_SIGNALING\_IN\_IMMUNE\_SYSTEM;REACTOME\_ANTIGEN\_PRESENTATION\_FOLDING\_

EACTOME\_REGULATION\_OF\_INSULIN\_SECRETION;REACTOME\_INHIBITION\_OF\_INSULIN\_SE

SIGNALING\_BY\_THE\_B\_CELL\_RECEPTOR\_BCR;REACTOME\_INSULIN\_RECEPTOR\_SIGNALLING\_PATHWAY\_VIA\_PKC\_AND\_MAPK;REACTOME\_SIGNALING\_BY\_GPCR;REACTOME\_INTI





ACTOME\_GPCR\_LIGAND\_BINDING

NS\_THAT\_BIND\_AU\_RICH\_ELEMENTS;REACTOME\_DESTABILIZATION\_OF\_MRNA\_BY\_KSRP;R

OME\_OPIOID\_SIGNALLING;REACTOME\_CA\_DEPENDENT\_EVENTS;REACTOME\_NEUROTRANS

TION;REACTOME\_ACTIVATION\_OF\_ATR\_IN\_RESPONSE\_TO\_REPLICATION\_STRESS;REACTO





ATION

ID\_ORGANIC\_ACIDS\_METAL\_IONS\_AND\_AMINE\_COMPOUNDS;REACTOME\_FACILITATIVE\_N/

STRAND\_SYNTHESIS;REACTOME\_DNA\_REPLICATION;REACTOME\_ACTIVATION\_OF\_ATR\_IN\_

ANSCRIPTIONAL\_REGULATION\_OF\_WHITE\_ADIPOCYTE\_DIFFERENTIATION

:X\_;REACTOME\_FORMATION\_OF\_TRANSCRIPTION\_COUPLED\_NER\_TC\_NER\_REPAIR\_COMF

ETABOLISM;REACTOME\_METABOLISM\_OF\_LIPIDS\_AND\_LIPOPROTEINS;REACTOME\_METAB  
ETABOLISM;REACTOME\_METABOLISM\_OF\_LIPIDS\_AND\_LIPOPROTEINS;REACTOME\_METAB

CTOME\_PACKAGING\_OF\_TELOMERE\_ENDS;REACTOME\_TELOMERE\_MAINTENANCE

INSULIN\_RECEPTOR;REACTOME\_HIV\_INFECTION;REACTOME\_HOST\_INTERACTIONS\_OF\_HIV

IMMUNE\_SYSTEM;REACTOME\_IMMUNE\_SYSTEM;REACTOME\_CYTOKINE\_SIGNALING\_IN\_IMM

SYSTEM;REACTOME\_CYTOKINE\_SIGNALING\_IN\_IMMUNE\_SYSTEM





HOME\_PROLONGED\_ERK\_ACTIVATION\_EVENTS;REACTOME\_SIGNALLING\_TO\_RAS;REACTO

ACTOME\_TRAF6\_MEDIATED\_INDUCTION\_OF\_NFKB\_AND\_MAP\_KINASES\_UPON\_TLR7\_8\_OR

:EACTOME\_METABOLISM\_OF\_LIPIDS\_AND\_LIPOPROTEINS;REACTOME\_FATTY\_ACID\_TRIAC`



}\_SIGNALLING\_EVENTS;REACTOME\_REGULATION\_OF\_INSULIN\_SECRETION;REACTOME\_RE

TOME\_FATTY\_ACID\_TRIACYLGLYCEROL\_AND\_KETONE\_BODY\_METABOLISM;REACTOME\_CI  
TOME\_FATTY\_ACID\_TRIACYLGLYCEROL\_AND\_KETONE\_BODY\_METABOLISM;REACTOME\_CI

}\_Y\_REV\_ERBA;REACTOME\_SIGNALING\_BY\_NOTCH1;REACTOME\_REGULATION\_OF\_HYPOXIA

REACTIONS;REACTOME\_CELL\_JUNCTION\_ORGANIZATION

APC\_C\_CDC20\_MEDIATED\_DEGRADATION\_OF\_MITOTIC\_PROTEINS;REACTOME\_AUTODEGR

SMO\_MEMBRANE;REACTOME\_SIGNALING\_BY\_FGFR\_IN\_DISEASE;REACTOME\_PI3K\_AKT\_AC





TOME\_FATTY\_ACID\_TRIACYLGLYCEROL\_AND\_KETONE\_BODY\_METABOLISM;REACTOME\_CI

MA\_MEMBRANE;REACTOME\_SIGNALING\_BY\_FGFR\_IN\_DISEASE;REACTOME\_PI3K\_AKT\_AC

DIGESTION\_MOBILIZATION\_AND\_TRANSPORT;REACTOME\_LIPOPROTEIN\_METABOLISM;R  
DIGESTION\_MOBILIZATION\_AND\_TRANSPORT;REACTOME\_LIPOPROTEIN\_METABOLISM;R

M;REACTOME\_SIGNALING\_BY\_GPCR;REACTOME\_NEUROTRANSMITTER\_RECEPTOR\_BINDING

TRANSLOCATION\_OF\_ZAP\_70\_TO\_IMMUNOLOGICAL\_SYNAPSE;REACTOME\_GENERATION\_OF

CYLGLYCEROL\_AND\_KETONE\_BODY\_METABOLISM;REACTOME\_PKB\_MEDIATED\_EVENTS;R

CTOME\_IL\_6\_SIGNALING;REACTOME\_IMMUNE\_SYSTEM;REACTOME\_CYTOKINE\_SIGNALING\_

N\_SEMAPHORIN\_SIGNALING;REACTOME\_SEMAPHORIN\_INTERACTIONS;REACTOME\_SEMA4

ΓED\_TRANSMEMBRANE\_TRANSPORT;REACTOME\_GLUCOSE\_TRANSPORT;REACTOME\_MET

SIGNALING\_BY\_THE\_B\_CELL\_RECEPTOR\_BCR;REACTOME\_NGF\_SIGNALLING\_VIA\_TRKA\_FF

IG\_INITIATES\_THE\_SECOND\_PROTEOLYTIC\_CLEAVAGE\_OF\_NOTCH\_RECEPTOR;REACTOM

TOME\_FATTY\_ACID\_TRIACYLGLYCEROL\_AND\_KETONE\_BODY\_METABOLISM;REACTOME\_CI

IUNE\_SYSTEM

REACTOME\_HEMOSTASIS



EM;REACTOME\_PLATELET\_ACTIVATION\_SIGNALING\_AND\_AGGREGATION

ME\_CLASS\_I\_MHC\_MEDIATED\_ANTIGEN\_PROCESSING\_PRESENTATION

ME\_REGULATION\_OF\_IFNG\_SIGNALING;REACTOME\_INTERFERON\_GAMMA\_SIGNALING;REA

IE\_PI3K\_CASCADE

PORTERS;REACTOME\_AMINE\_COMPOUND\_SLC\_TRANSPORTERS;REACTOME\_GABA\_SYNTHE

;REACTOME\_SIGNALLING\_TO\_RAS;REACTOME\_NGF\_SIGNALLING\_VIA\_TRKA\_FROM\_THE\_PI





ITS;REACTOME\_G\_ALPHA1213\_SIGNALLING\_EVENTS;REACTOME\_GPCR\_DOWNSTREAM\_SI  
ITS;REACTOME\_G\_ALPHA1213\_SIGNALLING\_EVENTS;REACTOME\_GPCR\_DOWNSTREAM\_SI

;-TO\_GENERATION\_OF\_SECOND\_MESSENGERS;REACTOME\_SIGNALING\_BY\_THE\_B\_CELL\_

;;REACTOME\_FGFR\_LIGAND\_BINDING\_AND\_ACTIVATION;REACTOME\_FGFR4\_LIGAND\_BINDI  
;;REACTOME\_FGFR\_LIGAND\_BINDING\_AND\_ACTIVATION;REACTOME\_FGFR4\_LIGAND\_BINDI  
;;REACTOME\_FGFR\_LIGAND\_BINDING\_AND\_ACTIVATION;REACTOME\_FGFR4\_LIGAND\_BINDI  
  
\_DECAY\_ENHANCED\_BY\_THE\_EXON\_JUNCTION\_COMPLEX

..LLING\_PATHWAY\_VIA\_PKC\_AND\_MAPK;REACTOME\_SIGNALING\_BY\_GPCR;REACTOME\_INTI

\_DECAY\_ENHANCED\_BY\_THE\_EXON\_JUNCTION\_COMPLEX





GNALLING;REACTOME\_CA\_DEPENDENT\_EVENTS;REACTOME\_ADENYLATE\_CYCLASE\_ACTIV

ME\_NCAM\_SIGNALING\_FOR\_NEURITE\_OUT\_GROWTH;REACTOME\_HEMOSTASIS;REACTOM

PTOR\_BCR;REACTOME\_P53\_INDEPENDENT\_G1\_S\_DNA\_DAMAGE\_CHECKPOINT;REACTOME  
S1\_TRANSITION;REACTOME\_G1\_S\_TRANSITION;REACTOME\_CDT1\_ASSOCIATION\_WITH\_THI

CYLGLYCEROL\_AND\_KETONE\_BODY\_METABOLISM;REACTOME\_PKB\_MEDIATED\_EVENTS;R  
CYLGLYCEROL\_AND\_KETONE\_BODY\_METABOLISM;REACTOME\_PKB\_MEDIATED\_EVENTS;R

ΓED\_CASCADE;REACTOME\_PI\_3K\_CASCADE;REACTOME\_DOWNSTREAM\_SIGNALING\_OF\_A  
ΓED\_CASCADE;REACTOME\_PI\_3K\_CASCADE;REACTOME\_DOWNSTREAM\_SIGNALING\_OF\_A

PTIDE\_SLC\_TRANSPORTERS



MA\_MEMBRANE;REACTOME\_SIGNALING\_BY\_FGFR\_IN\_DISEASE;REACTOME\_PI3K\_AKT\_AC

ME\_REGULATION\_OF\_INSULIN\_SECRETION;REACTOME\_GABA\_SYNTHESIS\_RELEASE\_REUP

≡\_APOPTOTIC\_EXECUTION\_PHASE

≡\_APOPTOTIC\_EXECUTION\_PHASE

≡\_APOPTOTIC\_EXECUTION\_PHASE

≡\_APOPTOTIC\_EXECUTION\_PHASE

TEM;REACTOME\_CYTOKINE\_SIGNALING\_IN\_IMMUNE\_SYSTEM





PTOR\_BCR;REACTOME\_P53\_INDEPENDENT\_G1\_S\_DNA\_DAMAGE\_CHECKPOINT;REACTOME

;REACTOME\_TRANSMISSION\_ACROSS\_CHEMICAL\_SYNAPSES;REACTOME\_NEURONAL\_SYS

IVATES\_NFKB\_BY\_PHOSPHORYLATION\_AND\_ACTIVATION\_OF\_IKKS\_COMPLEX;REACTOME\_

MA\_MEMBRANE;REACTOME\_SIGNALING\_BY\_FGFR\_IN\_DISEASE;REACTOME\_PI3K\_AKT\_AC

SIS;REACTOME\_INHIBITION\_OF\_REPLICATION\_INITIATION\_OF\_DAMAGED\_DNA\_BY\_RB1\_E2F

Y\_TGF\_BETA\_RECEPTOR\_COMPLEX

AIR;REACTOME\_AUTODEGRADATION\_OF\_THE\_E3\_UBIQUITIN\_LIGASE\_COP1;REACTOME\_D

N\_SEMAPHORIN\_SIGNALING;REACTOME\_SEMAPHORIN\_INTERACTIONS;REACTOME\_SEMA4

N\_SEMAPHORIN\_SIGNALING;REACTOME\_SEMAPHORIN\_INTERACTIONS;REACTOME\_SEMA4

E\_COSTIMULATION\_BY\_THE\_CD28\_FAMILY;REACTOME\_HIV\_INFECTION;REACTOME\_HIV\_LIF

GNALLING;REACTOME\_CA\_DEPENDENT\_EVENTS;REACTOME\_ADENYLATE\_CYCLASE\_ACTI



STRAND\_SYNTHESIS;REACTOME\_DNA\_REPLICATION;REACTOME\_ACTIVATION\_OF\_ATR\_IN\_

REACTOME\_HEMOSTASIS

ALING;REACTOME\_DOWNSTREAM\_SIGNALING\_EVENTS\_OF\_B\_CELL\_RECEPTOR\_BCR;REAC

}\_SIGNALLING\_EVENTS;REACTOME\_REGULATION\_OF\_INSULIN\_SECRETION;REACTOME\_RE





\_DECAY\_ENHANCED\_BY\_THE\_EXON\_JUNCTION\_COMPLEX

ANSCRIPTION;REACTOME\_CIRCADIAN\_REPRESSION\_OF\_EXPRESSION\_BY\_REV\_ERBA;REA  
ANSCRIPTION;REACTOME\_CIRCADIAN\_REPRESSION\_OF\_EXPRESSION\_BY\_REV\_ERBA;REA  
ANSCRIPTION;REACTOME\_CIRCADIAN\_REPRESSION\_OF\_EXPRESSION\_BY\_REV\_ERBA;REA  
GNALLING;REACTOME\_CA\_DEPENDENT\_EVENTS;REACTOME\_ADENYLATE\_CYCLASE\_ACTI



ED\_TRANSMEMBRANE\_TRANSPORT;REACTOME\_GLUCOSE\_TRANSPORT;REACTOME\_MET

VAY;REACTOME\_TRANSCRIPTION;REACTOME\_NUCLEOTIDE\_EXCISION\_REPAIR;REACTOME  
ME\_PLATELET\_ACTIVATION\_SIGNALING\_AND\_AGGREGATION

\_NOTCH1;REACTOME\_TRANSCRIPTIONAL\_ACTIVITY\_OF\_SMAD2\_SMAD3\_SMAD4\_HETEROT  
\_NOTCH1;REACTOME\_TRANSCRIPTIONAL\_ACTIVITY\_OF\_SMAD2\_SMAD3\_SMAD4\_HETEROT

/STEM;REACTOME\_ACTIVATED\_TLR4\_SIGNALLING;REACTOME\_IMMUNE\_SYSTEM;REACTOM

;REACTOME\_TRANSMISSION\_ACROSS\_CHEMICAL\_SYNAPSES;REACTOME\_NEURONAL\_SYS

\_DECAY\_ENHANCED\_BY\_THE\_EXON\_JUNCTION\_COMPLEX

N;REACTOME\_SIGNALING\_BY\_ILS;REACTOME\_IL\_6\_SIGNALING;REACTOME\_IMMUNE\_SYSTEM;  
N;REACTOME\_SIGNALING\_BY\_ILS;REACTOME\_IL\_6\_SIGNALING;REACTOME\_IMMUNE\_SYSTEM;  
N;REACTOME\_SIGNALING\_BY\_ILS;REACTOME\_IL\_6\_SIGNALING;REACTOME\_IMMUNE\_SYSTEM;

REACTOME\_NCAM\_SIGNALING\_FOR\_NEURITE\_OUT\_GROWTH;REACTOME\_HEMOSTASIS;REACTOME



MOTER\_OPENING;REACTOME\_MRNA\_PROCESSING;REACTOME\_MRNA\_SPLICING;REACTOI

NALING\_BY\_GPCR;REACTOME\_GPVI\_MEDIATED\_ACTIVATION\_CASCADE;REACTOME\_G\_ALI  
3NALING;REACTOME\_SIGNALING\_BY\_TGF\_BETA\_RECEPTOR\_COMPLEX



GNALLING;REACTOME\_RECRUITMENT\_OF\_MITOTIC\_CENTROSOME\_PROTEINS\_AND\_COMP

IGNALING\_BY\_TGF\_BETA\_RECEPTOR\_COMPLEX;REACTOME\_PLATELET\_ACTIVATION\_SIGNA

;REACTOME\_SYNTHESIS\_OF\_DNA;REACTOME\_DNA\_REPAIR;REACTOME\_CHROMOSOME\_M  
;REACTOME\_SYNTHESIS\_OF\_DNA;REACTOME\_DNA\_REPAIR;REACTOME\_CHROMOSOME\_M  
;REACTOME\_SYNTHESIS\_OF\_DNA;REACTOME\_DNA\_REPAIR;REACTOME\_CHROMOSOME\_M



\_GPCR\_DOWNSTREAM\_SIGNALING;REACTOME\_G\_ALPHA\_I\_SIGNALLING\_EVENTS;REACTOM  
\_GPCR\_DOWNSTREAM\_SIGNALING;REACTOME\_G\_ALPHA\_I\_SIGNALLING\_EVENTS;REACTOM

;REACTOME\_G\_ALPHA\_I\_SIGNALLING\_EVENTS;REACTOME\_TAK1\_ACTIVATES\_NFKB\_BY\_PI

ION;REACTOME\_ACTIVATION\_OF\_ATR\_IN\_RESPONSE\_TO\_REPLICATION\_STRESS;REACTO

HANNELS  
HANNELS









ACTIONS\_AT\_THE\_VASCULAR\_WALL;REACTOME\_NGF\_SIGNALLING\_VIA\_TRKA\_FROM\_THE\_

.ATELET\_ACTIVATION\_SIGNALING\_AND\_AGGREGATION

ON\_LYMPHOID\_CELL;REACTOME\_INTERFERON\_GAMMA\_SIGNALING;REACTOME\_INTERFER

ALING;REACTOME\_DOWNSTREAM\_SIGNALING\_EVENTS\_OF\_B\_CELL\_RECEPTOR\_BCR;REAC

GINASES\_PHOSPHORYLATION\_AND\_ACTIVATION\_MEDIATED\_BY\_ACTIVATED\_HUMAN\_TAK1;

WRITE\_OUT\_GROWTH;REACTOME\_NETRIN1\_SIGNALING;REACTOME\_DCC\_MEDIATED\_ATT

CADE;REACTOME\_SIGNALING\_BY\_INSULIN\_RECEPTOR;REACTOME\_FGFR\_LIGAND\_BINDING

N\_SEMAPHORIN\_SIGNALING;REACTOME\_SEMAPHORIN\_INTERACTIONS;REACTOME\_SEMA4

NA\_REPLICATION;REACTOME\_S\_PHASE

GINASES\_PHOSPHORYLATION\_AND\_ACTIVATION\_MEDIATED\_BY\_ACTIVATED\_HUMAN\_TAK1;

ON\_OF\_RAC;REACTOME\_SIGNALING\_BY\_ROBO\_RECEPTOR

TIONAL\_REGULATION;REACTOME\_METABOLISM\_OF\_MRNA;REACTOME\_METABOLISM\_OF\_F

OKINE\_SIGNALING\_IN\_IMMUNE\_SYSTEM;REACTOME\_ANTIGEN\_PRESENTATION\_FOLDING\_

IUNE\_SYSTEM;REACTOME\_ADAPTIVE\_IMMUNE\_SYSTEM



ME\_G\_ALPHA\_I\_SIGNALLING\_EVENTS;REACTOME\_G\_ALPHA\_S\_SIGNALLING\_EVENTS;REACT

APC\_C\_CDC20\_MEDIATED\_DEGRADATION\_OF\_MITOTIC\_PROTEINS;REACTOME\_AUTODEGR

NG\_SIGNALING;REACTOME\_INTERFERON\_GAMMA\_SIGNALING;REACTOME\_INTERFERON\_S

\_NRIF\_AND\_NADE;REACTOME\_P75\_NTR\_RECEPTOR\_MEDIATED\_SIGNALLING;REACTOME\_





...LIPIDS\_AND\_LIPOPROTEINS

...E\_3\_PROMOTER;REACTOME\_HIV\_INFECTION;REACTOME\_HIV\_LIFE\_CYCLE;REACTOME\_LA

...ROMBOXANE\_SIGNALLING\_THROUGH\_TP\_RECEPTOR;REACTOME\_THROMBIN\_SIGNALLING

ATION;REACTOME\_AXON\_GUIDANCE;REACTOME\_LYSOSOME\_VESICLE\_BIOGENESIS;REAC

\_ING\_BY\_ROBO\_RECEPTOR;REACTOME\_METABOLISM\_OF\_CARBOHYDRATES

OKINE\_SIGNALING\_IN\_IMMUNE\_SYSTEM;REACTOME\_ANTIGEN\_PRESENTATION\_FOLDING\_

AIR;REACTOME\_AUTODEGRADATION\_OF\_THE\_E3\_UBIQUITIN\_LIGASE\_COP1;REACTOME\_D

SIGNALING\_BY\_THE\_B\_CELL\_RECEPTOR\_BCR;REACTOME\_INSULIN\_RECEPTOR\_SIGNALLING





ΓED\_TRANSMEMBRANE\_TRANSPORT;REACTOME\_GLUCOSE\_TRANSPORT;REACTOME\_MET



\_DECAY\_ENHANCED\_BY\_THE\_EXON\_JUNCTION\_COMPLEX

ACTIONS\_AT\_THE\_VASCULAR\_WALL;REACTOME\_NGF\_SIGNALLING\_VIA\_TRKA\_FROM\_THE\_

D\_CASCADE;REACTOME\_SHC\_MEDIATED\_CASCADE;REACTOME\_SIGNALING\_BY\_INSULIN\_F

ID\_LIOPROTEINS;REACTOME\_FATTY\_ACID\_TRIACYLGLYCEROL\_AND\_KETONE\_BODY\_MET

INTERACTIONS;REACTOME\_SEMAPHORIN\_INTERACTIONS;REACTOME\_CELL\_EXTRACELLUL

ME\_MITOTIC\_PROMETAPHASE;REACTOME\_APC\_CDC20\_MEDIATED\_DEGRADATION\_OF\_NEI

}\_SIGNALLING\_EVENTS;REACTOME\_REGULATION\_OF\_INSULIN\_SECRETION;REACTOME\_RE

GINASES\_PHOSPHORYLATION\_AND\_ACTIVATION\_MEDIATED\_BY\_ACTIVATED\_HUMAN\_TAK1;

ACTOME\_SIGNALING\_BY\_NOTCH;REACTOME\_METABOLISM\_OF\_CARBOHYDRATES

CTOME\_IL\_6\_SIGNALING;REACTOME\_IMMUNE\_SYSTEM;REACTOME\_CYTOKINE\_SIGNALING\_

IN\_THE\_POSTSYNAPTIC\_CELL;REACTOME\_G\_ALPHA1213\_SIGNALLING\_EVENTS;REACTOME

SIS;REACTOME\_INHIBITION\_OF\_REPLICATION\_INITIATION\_OF\_DAMAGED\_DNA\_BY\_RB1\_E2F

CELLING\_PATHWAY\_VIA\_PKC\_AND\_MAPK;REACTOME\_SIGNALING\_BY\_GPCR;REACTOME\_INTI





1E\_SIGNALING\_BY\_NOTCH;REACTOME\_RNA\_POL\_I\_TRANSCRIPTION\_INITIATION

ABOLISM\_OF\_RNA;REACTOME\_INTERFERON\_SIGNALING;REACTOME\_METABOLISM\_OF\_CA

V\_THE\_POSTSYNAPTIC\_CELL;REACTOME\_PLC\_BETA\_MEDIATED\_EVENTS;REACTOME\_SIGM  
PK\_TARGETS;REACTOME\_GLYCOLYSIS;REACTOME\_SIGNALING\_BY\_GPCR;REACTOME\_INTI



TAK1\_ACTIVATES\_NFKB\_BY\_PHOSPHORYLATION\_AND\_ACTIVATION\_OF\_IKKS\_COMPLEX;RE



;REACTOME\_TRANSMEMBRANE\_TRANSPORT\_OF\_SMALL\_MOLECULES;REACTOME\_GLUCA

NALING\_BY\_FGFR\_IN\_DISEASE;REACTOME\_PI3K\_AKT\_ACTIVATION;REACTOME\_GAB1\_SIGN  
NALING\_BY\_FGFR\_IN\_DISEASE;REACTOME\_PI3K\_AKT\_ACTIVATION;REACTOME\_GAB1\_SIGN

E\_CDC6\_ORC\_ORIGIN\_COMPLEX;REACTOME\_SYNTHESIS\_OF\_DNA;REACTOME\_MITOTIC\_G

RCADIAN\_CLOCK;REACTOME\_TRANSCRIPTIONAL\_REGULATION\_OF\_WHITE\_ADIPOCYTE\_D

\_PLASMA\_MEMBRANE;REACTOME\_SIGNALING\_BY\_FGFR\_IN\_DISEASE;REACTOME\_PHOSPHI





TE\_ADIPOCYTE\_DIFFERENTIATION;REACTOME\_SIGNALING\_BY\_NOTCH;REACTOME\_SIGNALING\_REPERTOIRE;REACTOME\_RIG\_I\_MDA5\_MEDIATED\_INDUCTION\_OF\_IFN\_ALF







.HEMOSTASIS;REACTOME\_PLATELET\_ACTIVATION\_SIGNALING\_AND\_AGGREGATION

.PLASMA\_MEMBRANE;REACTOME\_SIGNALING\_BY\_FGFR\_IN\_DISEASE;REACTOME\_PHOSPHI  
.PLASMA\_MEMBRANE;REACTOME\_SIGNALING\_BY\_FGFR\_IN\_DISEASE;REACTOME\_PHOSPHI

ASSEMBLY\_AND\_PEPTIDE\_LOADING\_OF\_CLASS\_I\_MHC;REACTOME\_CLASS\_I\_MHC\_MEDIAT

CRETION\_BY\_ADRENALINE\_NORADRENALINE;REACTOME\_GPCR\_DOWNSTREAM\_SIGNALIN

G\_CASCADE;REACTOME\_ARMS\_MEDIATED\_ACTIVATION;REACTOME\_PROLONGED\_ERK\_AC  
TEGRATION\_OF\_ENERGY\_METABOLISM;REACTOME\_OPIOID\_SIGNALLING;REACTOME\_PLC\_E





REACTOME\_DESTABILIZATION\_OF\_MRNA\_BY\_TRISTETRAPROLIN\_TTP

SMITTER\_RECEPTOR\_BINDING\_AND\_DOWNSTREAM\_TRANSMISSION\_IN\_THE\_POSTSYNAPT

ME\_UNWINDING\_OF\_DNA;REACTOME\_G2\_M\_CHECKPOINTS;REACTOME\_S\_PHASE;REACTC





\\_INDEPENDENT\\_GLUCOSE\\_TRANSPORTERS;REACTOME\\_GLUCOSE\\_TRANSPORT;REACTO

.RESPONSE\\_TO\\_REPLICATION\\_STRESS;REACTOME\\_TELOMERE\\_MAINTENANCE;REACTOME

'LEX;REACTOME\_RNA\_POL\_I\_RNA\_POL\_III\_AND\_MITOCHONDRIAL\_TRANSCRIPTION;REACTO

OLISM\_OF\_CARBOHYDRATES

OLISM\_OF\_CARBOHYDRATES

'\_FACTORS;REACTOME\_THE\_ROLE\_OF\_NEF\_IN\_HIV1\_REPLICATION\_AND\_DISEASE\_PATHO

IUNE\_SYSTEM





ME\_NGF\_SIGNALLING\_VIA\_TRKA\_FROM\_THE\_PLASMA\_MEMBRANE;REACTOME\_SIGNALLING

\_9\_ACTIVATION;REACTOME\_NFKB\_AND\_MAP\_KINASES\_ACTIVATION\_MEDIATED\_BY\_TLR4\_!

YLGlycerol\_and\_ketone\_body\_metabolism;Reactome\_circadian\_clock;ReactoI



:GULATION\_OF\_INSULIN\_SECRETION\_BY\_ACETYLCHOLINE;REACTOME\_G\_BETA\_GAMMA\_S

RCADIAN\_CLOCK;REACTOME\_TRANSCRIPTIONAL\_REGULATION\_OF\_WHITE\_ADIPOCYTE\_D  
RCADIAN\_CLOCK;REACTOME\_TRANSCRIPTIONAL\_REGULATION\_OF\_WHITE\_ADIPOCYTE\_D

\\_INDUCIBLE\_FACTOR\_HIF\_BY\_OXYGEN;REACTOME\_METABOLISM\_OF\_LIPIDS\_AND\_LIPOPF



ADATION\_OF\_CDH1\_BY\_CDH1\_APC\_C;REACTOME\_APC\_C\_CDC20\_MEDIATED\_DEGRADATIC

TIVATION;REACTOME\_GAB1\_SIGNALOSOME;REACTOME\_SIGNALING\_BY\_PDGF;REACTOME\_





RCADIAN\_CLOCK;REACTOME\_TRANSCRIPTIONAL\_REGULATION\_OF\_WHITE\_ADIPOCYTE\_D

TIVATION;REACTOME\_AKT\_PHOSPHORYLATES\_TARGETS\_IN\_THE\_CYTOSOL;REACTOME\_G

EACTOME\_CHYLOMICRON\_MEDIATED\_LIPID\_TRANSPORT;REACTOME\_AMYLOIDS  
EACTOME\_CHYLOMICRON\_MEDIATED\_LIPID\_TRANSPORT;REACTOME\_AMYLOIDS

NG\_AND\_DOWNSTREAM\_TRANSMISSION\_IN\_THE\_POSTSYNAPTIC\_CELL;REACTOME\_AXON

F\_SECOND\_MESSENGER\_MOLECULES;REACTOME\_GPVI\_MEDIATED\_ACTIVATION\_CASCAD

EACTOME\_SIGNALING\_BY\_INSULIN\_RECEPTOR;REACTOME\_PI3K\_CASCADE  
\_IN\_IMMUNE\_SYSTEM

ID\_INDUCED\_CELL\_MIGRATION\_AND\_GROWTH\_CONE\_COLLAPSE

ABOLISM\_OF\_RNA;REACTOME\_INTERFERON\_SIGNALING;REACTOME\_METABOLISM\_OF\_CA

FROM\_THE\_PLASMA\_MEMBRANE;REACTOME\_SIGNALING\_BY\_FGFR\_IN\_DISEASE;REACTOME

E\_SIGNALING\_BY\_NOTCH;REACTOME\_IMMUNE\_SYSTEM;REACTOME\_CYTOKINE\_SIGNALING

RCADIAN\_CLOCK;REACTOME\_TRANSCRIPTIONAL\_REGULATION\_OF\_WHITE\_ADIPOCYTE\_D





CTOME\_INTERFERON\_ALPHA\_BETA\_SIGNALING;REACTOME\_REGULATION\_OF\_IFNA\_SIGNA

SIS\_RELEASE\_REUPTAKE\_AND\_DEGRADATION

LASMA\_MEMBRANE;REACTOME\_SIGNALLING\_TO\_ERKS;REACTOME\_SIGNALING\_BY\_FGFR\_





GNALING;REACTOME\_NETRIN1\_SIGNALING;REACTOME\_DCC\_MEDIATED\_ATTRACTIVE\_SIG  
GNALING;REACTOME\_NETRIN1\_SIGNALING;REACTOME\_DCC\_MEDIATED\_ATTRACTIVE\_SIG

.RECEPTOR\_BCR;REACTOME\_INSULIN\_RECEPTOR\_SIGNALLING\_CASCADE;REACTOME\_CEI

NG\_AND\_ACTIVATION;REACTOME\_SIGNALING\_BY\_FGFR;REACTOME\_PI3K\_CASCADE  
NG\_AND\_ACTIVATION;REACTOME\_SIGNALING\_BY\_FGFR;REACTOME\_PI3K\_CASCADE  
NG\_AND\_ACTIVATION;REACTOME\_SIGNALING\_BY\_FGFR;REACTOME\_PI3K\_CASCADE

EGRATION\_OF\_ENERGY\_METABOLISM;REACTOME\_OPIOID\_SIGNALLING;REACTOME\_PLC\_E





\_AND\_MAP\_KINASES\_ACTIVATION\_MEDIATED\_BY\_TLR4\_SIGNALING\_REPERTOIRE;REACTO

VATING\_PATHWAY;REACTOME\_ADENYLATE\_CYCLASE\_INHIBITORY\_PATHWAY;REACTOME\_

IE\_PLATELET\_ACTIVATION\_SIGNALING\_AND\_AGGREGATION

CDK\_MEDIATED\_PHOSPHORYLATION\_AND\_REMOVAL\_OF\_CDC6;REACTOME\_METABOLISM  
E\_CDC6\_ORC\_ORIGIN\_COMPLEX;REACTOME\_SYNTHESIS\_OF\_DNA;REACTOME\_MITOTIC\_G

EACTOME\_SIGNALING\_BY\_INSULIN\_RECEPTOR;REACTOME\_PI3K\_CASCADE  
EACTOME\_SIGNALING\_BY\_INSULIN\_RECEPTOR;REACTOME\_PI3K\_CASCADE

CTIVATED\_FGFR;REACTOME\_PHOSPHOLIPASE\_C\_MEDIATED\_CASCADE;REACTOME\_SHC\_M  
CTIVATED\_FGFR;REACTOME\_PHOSPHOLIPASE\_C\_MEDIATED\_CASCADE;REACTOME\_SHC\_M





TIVATION;REACTOME\_GAB1\_SIGNALOSOME;REACTOME\_SIGNALING\_BY\_PDGF;REACTOME\_

TAKE\_AND\_DEGRADATION





CDK\_MEDIATED\_PHOSPHORYLATION\_AND\_REMOVAL\_OF\_CDC6;REACTOME\_METABOLISM

REACTOME\_NEUROTRANSMITTER\_RECEPTOR\_BINDING\_AND\_DOWNSTREAM\_TRANS

.GPCR\_LIGAND\_BINDING;REACTOME\_TRAF6\_MEDIATED\_NFKB\_ACTIVATION;REACTOME\_TR

TIVATION;REACTOME\_AKT\_PHOSPHORYLATES\_TARGETS\_IN\_THE\_CYTOSOL;REACTOME\_G

=1;REACTOME\_DNA\_REPLICATION;REACTOME\_E2F\_MEDIATED\_REGULATION\_OF\_DNA\_REF

NA\_REPAIR;REACTOME\_MEIOTIC\_RECOMBINATION;REACTOME\_G2\_M\_CHECKPOINTS;REAC

!D\_INDUCED\_CELL\_MIGRATION\_AND\_GROWTH\_CONE\_COLLAPSE

ID\_INDUCED\_CELL\_MIGRATION\_AND\_GROWTH\_CONE\_COLLAPSE

FE\_CYCLE;REACTOME\_EARLY\_PHASE\_OF\_HIV\_LIFE\_CYCLE;REACTOME\_HOST\_INTERACTIC

VATING\_PATHWAY;REACTOME\_ADENYLATE\_CYCLASE\_INHIBITORY\_PATHWAY;REACTOME\_



.RESPONSE\_TO\_REPLICATION\_STRESS;REACTOME\_TELOMERE\_MAINTENANCE;REACTOME



;TOME\_SIGNALING\_BY\_THE\_B\_CELL\_RECEPTOR\_BCR;REACTOME\_NGF\_SIGNALLING\_VIA\_T

:GULATION\_OF\_INSULIN\_SECRETION\_BY\_ACETYLCHOLINE;REACTOME\_G\_BETA\_GAMMA\_S





.CTOME\_SIGNALING\_BY\_NOTCH1;REACTOME\_REGULATION\_OF\_HYPOXIA\_INDUCIBLE\_FACT  
.CTOME\_SIGNALING\_BY\_NOTCH1;REACTOME\_REGULATION\_OF\_HYPOXIA\_INDUCIBLE\_FACT  
.CTOME\_SIGNALING\_BY\_NOTCH1;REACTOME\_REGULATION\_OF\_HYPOXIA\_INDUCIBLE\_FACT  
VATING\_PATHWAY;REACTOME\_ADENYLATE\_CYCLASE\_INHIBITORY\_PATHWAY;REACTOME\_



ABOLISM\_OF\_RNA;REACTOME\_INTERFERON\_SIGNALING;REACTOME\_METABOLISM\_OF\_CA

:\_FORMATION\_OF\_RNA\_POL\_II\_ELONGATION\_COMPLEX\_;REACTOME\_ELONGATION\_ARRES

RIMER;REACTOME\_DOWNREGULATION\_OF\_SMAD2\_3\_SMAD4\_TRANSCRIPTIONAL\_ACTIVIT  
RIMER;REACTOME\_DOWNREGULATION\_OF\_SMAD2\_3\_SMAD4\_TRANSCRIPTIONAL\_ACTIVIT

/E\_TOLL\_RECEPTOR\_CASCADES

TEM;REACTOME\_NEUROTRANSMITTER\_RECEPTOR\_BINDING\_AND\_DOWNSTREAM\_TRANS

EM;REACTOME\_CYTOKINE\_SIGNALING\_IN\_IMMUNE\_SYSTEM  
EM;REACTOME\_CYTOKINE\_SIGNALING\_IN\_IMMUNE\_SYSTEM  
EM;REACTOME\_CYTOKINE\_SIGNALING\_IN\_IMMUNE\_SYSTEM

IE\_PLATELET\_ACTIVATION\_SIGNALING\_AND\_AGGREGATION



ME\_MRNA\_SPLICING\_MINOR\_PATHWAY;REACTOME\_TRANSCRIPTION;REACTOME\_NUCLEO

PHA1213\_SIGNALLING\_EVENTS;REACTOME\_CD28\_CO\_STIMULATION;REACTOME\_GPCR\_DC



'LEXES;REACTOME\_CA\_DEPENDENT\_EVENTS;REACTOME\_DARPP\_32\_EVENTS;REACTOME\_

.LING\_AND\_AGGREGATION

IAINTENANCE;REACTOME\_GLOBAL\_GENOMIC\_NER\_GG\_NER;REACTOME\_LAGGING\_STRAN  
IAINTENANCE;REACTOME\_GLOBAL\_GENOMIC\_NER\_GG\_NER;REACTOME\_LAGGING\_STRAN  
IAINTENANCE;REACTOME\_GLOBAL\_GENOMIC\_NER\_GG\_NER;REACTOME\_LAGGING\_STRAN



ME\_G\_ALPHA\_S\_SIGNALLING\_EVENTS;REACTOME\_G\_ALPHA\_Z\_SIGNALLING\_EVENTS;REAC  
ME\_G\_ALPHA\_S\_SIGNALLING\_EVENTS;REACTOME\_G\_ALPHA\_Z\_SIGNALLING\_EVENTS;REAC

PHOSPHORYLATION\_AND\_ACTIVATION\_OF\_IKKS\_COMPLEX;REACTOME\_GPCR\_LIGAND\_BIND

ME\_UNWINDING\_OF\_DNA;REACTOME\_G2\_M\_CHECKPOINTS;REACTOME\_S\_PHASE;REACTC











\_PLASMA\_MEMBRANE;REACTOME\_SIGNALING\_BY\_FGFR\_IN\_DISEASE;REACTOME\_PHOSPHI

ON\_ALPHA\_BETA\_SIGNALING;REACTOME\_INTERFERON\_SIGNALING;REACTOME\_HIV\_INFEC

;TOME\_SIGNALING\_BY\_THE\_B\_CELL\_RECEPTOR\_BCR;REACTOME\_NGF\_SIGNALLING\_VIA\_T

;REACTOME\_ACTIVATED\_TAK1\_MEDIATES\_P38\_MAPK\_ACTIVATION;REACTOME\_SIGNALING

ACTIVE\_SIGNALING;REACTOME\_SIGNAL\_REGULATORY\_PROTEIN\_SIRP\_FAMILY\_INTERACT

3\_AND\_ACTIVATION;REACTOME\_FGFR2C\_LIGAND\_BINDING\_AND\_ACTIVATION;REACTOME\_

ID\_INDUCED\_CELL\_MIGRATION\_AND\_GROWTH\_CONE\_COLLAPSE

;REACTOME\_ACTIVATED\_TAK1\_MEDIATES\_P38\_MAPK\_ACTIVATION;REACTOME\_SIGNALING

RNA;REACTOME\_INFLUENZA\_LIFE\_CYCLE;REACTOME\_INFLUENZA\_VIRAL\_RNA\_TRANSCRIP

ASSEMBLY\_AND\_PEPTIDE\_LOADING\_OF\_CLASS\_I\_MHC;REACTOME\_CLASS\_I\_MHC\_MEDIAT





HOME\_G\_ALPHA\_Z\_SIGNALLING\_EVENTS;REACTOME\_SIGNAL\_AMPLIFICATION;REACTOME\_

ADATION\_OF\_CDH1\_BY\_CDH1\_APC\_C;REACTOME\_APC\_C\_CDC20\_MEDIATED\_DEGRADATIC

IGNALING;REACTOME\_IL\_2\_SIGNALING;REACTOME\_IL\_6\_SIGNALING;REACTOME\_HEMOSTA

TAK1\_ACTIVATES\_NFKB\_BY\_PHOSPHORYLATION\_AND\_ACTIVATION\_OF\_IKKS\_COMPLEX;RE





.TE\_PHASE\_OF\_HIV\_LIFE\_CYCLE

\_THROUGH\_PROTEINASE\_ACTIVATED\_RECEPTORS\_PARS;REACTOME\_HEMOSTASIS;REAC

TOME\_GOLGI\_ASSOCIATED\_VESICLE\_BIOGENESIS;REACTOME\_L1CAM\_INTERACTIONS;REA

ASSEMBLY\_AND\_PEPTIDE\_LOADING\_OF\_CLASS\_I\_MHC;REACTOME\_CLASS\_I\_MHC\_MEDIAT

NA\_REPAIR;REACTOME\_MEIOTIC\_RECOMBINATION;REACTOME\_G2\_M\_CHECKPOINTS;REAC

G\_CASCADE;REACTOME\_ARMS\_MEDIATED\_ACTIVATION;REACTOME\_PROLONGED\_ERK\_AC





ABOLISM\_OF\_RNA;REACTOME\_INTERFERON\_SIGNALING;REACTOME\_METABOLISM\_OF\_CA



\_PLASMA\_MEMBRANE;REACTOME\_SIGNALING\_BY\_FGFR\_IN\_DISEASE;REACTOME\_PHOSPHO

RECEPTOR;REACTOME\_FGFR\_LIGAND\_BINDING\_AND\_ACTIVATION;REACTOME\_FGFR2C\_LIK

ABOLISM

AR\_MATRIX\_INTERACTIONS;REACTOME\_CELL\_JUNCTION\_ORGANIZATION;REACTOME\_L1C/

:GULATION\_OF\_INSULIN\_SECRETION\_BY\_ACETYLCHOLINE;REACTOME\_G\_BETA\_GAMMA\_S

;REACTOME\_ACTIVATED\_TAK1\_MEDIATES\_P38\_MAPK\_ACTIVATION;REACTOME\_SIGNALING

\_IN\_IMMUNE\_SYSTEM

≡\_GPCR\_DOWNSTREAM\_SIGNALING;REACTOME\_RAS\_ACTIVATION\_UOPN\_CA2\_INFUX\_THR

≠1;REACTOME\_DNA\_REPLICATION;REACTOME\_E2F\_MEDIATED\_REGULATION\_OF\_DNA\_REF

REGULATION\_OF\_ENERGY\_METABOLISM;REACTOME\_OPIOID\_SIGNALLING;REACTOME\_PLC\_E





URBOHYDRATES;REACTOME\_INFLUENZA\_LIFE\_CYCLE;REACTOME\_NEP\_NS2\_INTERACTS\_W

VALING\_BY\_PDGF;REACTOME\_DOWNSTREAM\_SIGNAL\_TRANSDUCTION;REACTOME\_ACTIV/  
EGRATION\_OF\_ENERGY\_METABOLISM;REACTOME\_CELL\_CYCLE\_MITOTIC;REACTOME\_OPIK



REACTOME\_MAP\_KINASE\_ACTIVATION\_IN\_TLR\_CASCADE;REACTOME\_JNK\_C\_JUN\_KINASES\_



.GON\_SIGNALING\_IN\_METABOLIC\_REGULATION;REACTOME\_SIGNALING\_BY\_PDGF;REACTO

IALOSOME;REACTOME\_SIGNALING\_BY\_PDGF;REACTOME\_DOWNSTREAM\_SIGNAL\_TRANSD  
IALOSOME;REACTOME\_SIGNALING\_BY\_PDGF;REACTOME\_DOWNSTREAM\_SIGNAL\_TRANSD

1\_G1\_S\_PHASES;REACTOME\_MITOTIC\_M\_M\_G1\_PHASES;REACTOME\_ASSEMBLY\_OF\_THE\_

DIFFERENTIATION

OLIPID\_METABOLISM;REACTOME\_GASTRIN\_CREB\_SIGNALLING\_PATHWAY\_VIA\_PKC\_AND\_I





ING\_BY\_TGF\_BETA\_RECEPTOR\_COMPLEX

'HA\_BETA\_PATHWAYS;REACTOME\_APOPTOSIS;REACTOME\_MYD88\_MAL\_CASCADE\_INITIAT







OLIPID\_METABOLISM;REACTOME\_GASTRIN\_CREB\_SIGNALLING\_PATHWAY\_VIA\_PKC\_AND\_M  
OLIPID\_METABOLISM;REACTOME\_GASTRIN\_CREB\_SIGNALLING\_PATHWAY\_VIA\_PKC\_AND\_M

ED\_ANTIGEN\_PROCESSING\_PRESENTATION

IG;REACTOME\_G\_ALPHA\_I\_SIGNALLING\_EVENTS;REACTOME\_G\_ALPHA\_S\_SIGNALLING\_EV

;TIVATION\_EVENTS;REACTOME\_SIGNALLING\_TO\_RAS;REACTOME\_CELL\_SURFACE\_INTERA  
;ETA\_MEDIATED\_EVENTS;REACTOME\_ELEVATION\_OF\_CYTOSOLIC\_CA2\_LEVELS;REACTOM





IC\_CELL;REACTOME\_PLC\_BETA\_MEDIATED\_EVENTS;REACTOME\_SIGNALING\_BY\_PDGF;RE

ME\_DNA\_STRAND\_ELONGATION





ME\_METABOLISM\_OF\_CARBOHYDRATES

:\_EXTENSION\_OF\_TELOMERES;REACTOME\_G2\_M\_CHECKPOINTS;REACTOME\_S\_PHASE;RE

OME\_DNA\_REPAIR;REACTOME\_RNA\_POL\_II\_PRE\_TRANSCRIPTION\_EVENTS;REACTOME\_GL

GENESIS







G\_TO\_ERKS;REACTOME\_SIGNALING\_BY\_FGFR\_IN\_DISEASE;REACTOME\_SIGNALLING\_TO\_F

SIGNALING\_REPERTOIRE;REACTOME\_MYD88\_MAL\_CASCADE\_INITIATED\_ON\_PLASMA\_MEM

ME\_TRANSCRIPTIONAL\_REGULATION\_OF\_WHITE\_ADIPOCYTE\_DIFFERENTIATION



IGNALLING\_THROUGH\_PLC\_BETA;REACTOME\_GPCR\_DOWNSTREAM\_SIGNALING;REACTOM

DIFFERENTIATION  
DIFFERENTIATION

PROTEINS;REACTOME\_FATTY\_ACID\_TRIACYLGLYCEROL\_AND\_KETONE\_BODY\_METABOLISM



ON\_OF\_CYCLIN\_B;REACTOME\_CONVERSION\_FROM\_APC\_C\_CDC20\_TO\_APC\_C\_CDH1\_IN\_L/

\_DOWNSTREAM\_SIGNAL\_TRANSDUCTION;REACTOME\_CD28\_CO\_STIMULATION;REACTOME.





DIFFERENTIATION

AB1\_SIGNALOSOME;REACTOME\_REGULATION\_OF\_APOPTOSIS;REACTOME\_SIGNALING\_BY

\_GUIDANCE;REACTOME\_ACTIVATION\_OF\_NMDA\_RECEPTOR\_UPON\_Glutamate\_BINDING.

REACTOME\_CD28\_CO\_STIMULATION;REACTOME\_CD28\_DEPENDENT\_VAV1\_PATHWAY;RE



.RBOHYDRATES;REACTOME\_INFLUENZA\_LIFE\_CYCLE;REACTOME\_NEP\_NS2\_INTERACTS\_W

\_NEGATIVE\_REGULATION\_OF\_THE\_PI3K\_AKT\_NETWORK;REACTOME\_PI3K\_AKT\_ACTIVATIC

3\_IN\_IMMUNE\_SYSTEM

DIFFERENTIATION





.LING;REACTOME\_INTERFERON\_SIGNALING;REACTOME\_IL\_6\_SIGNALING;REACTOME\_IMML

.IN\_DISEASE;REACTOME\_SIGNALLING\_TO\_P38\_VIA\_RIT\_AND\_RIN;REACTOME\_GASTRIN\_CR





VALING  
VALING

.L\_SURFACE\_INTERACTIONS\_AT\_THE\_VASCULAR\_WALL;REACTOME\_NGF\_SIGNALLING\_VIA

BETA\_MEDIATED\_EVENTS;REACTOME\_ELEVATION\_OF\_CYTOSOLIC\_CA2\_LEVELS;REACTOM





ME\_MYD88\_MAL\_CASCADE\_INITIATED\_ON\_PLASMA\_MEMBRANE;REACTOME\_INNATE\_IMML

NEUROTRANSMITTER\_RECEPTOR\_BINDING\_AND\_DOWNSTREAM\_TRANSMISSION\_IN\_THE\_

M\_OF\_AMINO\_ACIDS\_AND\_DERIVATIVES;REACTOME\_REGULATION\_OF\_ORNITHINE\_DECAR  
1\_G1\_S\_PHASES;REACTOME\_MITOTIC\_M\_M\_G1\_PHASES;REACTOME\_ASSEMBLY\_OF\_THE\_

MEDIATED\_CASCADE;REACTOME\_L1CAM\_INTERACTIONS;REACTOME\_SIGNAL\_TRANSDUCT  
MEDIATED\_CASCADE;REACTOME\_L1CAM\_INTERACTIONS;REACTOME\_SIGNAL\_TRANSDUCT





\_DOWNSTREAM\_SIGNAL\_TRANSDUCTION;REACTOME\_CD28\_CO\_STIMULATION;REACTOME.





M\_OF\_AMINO\_ACIDS\_AND\_DERIVATIVES;REACTOME\_REGULATION\_OF\_ORNITHINE\_DECAR

MISSION\_IN\_THE\_POSTSYNAPTIC\_CELL;REACTOME\_AXON\_GUIDANCE;REACTOME\_TRAFFI

AF6\_MEDIATED\_INDUCION\_OF\_NFKB\_AND\_MAP\_KINASES\_UPON\_TLR7\_8\_OR\_9\_ACTIVAT

AB1\_SIGNALOSOME;REACTOME\_NRAGE\_SIGNALS\_DEATH\_THROUGH\_JNK;REACTOME\_CEI

PLICATION;REACTOME\_TELOMERE\_MAINTENANCE;REACTOME\_EXTENSION\_OF\_TELOMERE

CTOME\_G2\_M\_DNA\_DAMAGE\_CHECKPOINT

IONS\_OF\_HIV\_FACTORS;REACTOME\_INNATE\_IMMUNE\_SYSTEM;REACTOME\_THE\_ROLE\_OF\_

NEUROTRANSMITTER\_RECEPTOR\_BINDING\_AND\_DOWNSTREAM\_TRANSMISSION\_IN\_THE\_



:\_EXTENSION\_OF\_TELOMERES;REACTOME\_G2\_M\_CHECKPOINTS;REACTOME\_S\_PHASE;RE



TRKA\_FROM\_THE\_PLASMA\_MEMBRANE;REACTOME\_SIGNALING\_BY\_FGFR\_IN\_DISEASE;REA

IGNALLING\_THROUGH\_PLC\_BETA;REACTOME\_GPCR\_DOWNSTREAM\_SIGNALING;REACTOM





TOR\_HIF\_BY\_OXYGEN;REACTOME\_GENERIC\_TRANSCRIPTION\_PATHWAY;REACTOME\_NOTI  
TOR\_HIF\_BY\_OXYGEN;REACTOME\_GENERIC\_TRANSCRIPTION\_PATHWAY;REACTOME\_NOTI  
TOR\_HIF\_BY\_OXYGEN;REACTOME\_GENERIC\_TRANSCRIPTION\_PATHWAY;REACTOME\_NOTI  
NEUROTRANSMITTER\_RECEPTOR\_BINDING\_AND\_DOWNSTREAM\_TRANSMISSION\_IN\_THE\_



URBOHYDRATES;REACTOME\_INFLUENZA\_LIFE\_CYCLE;REACTOME\_NEP\_NS2\_INTERACTS\_W

ST\_AND\_RECOVERY;REACTOME\_FORMATION\_OF\_TRANSCRIPTION\_COUPLED\_NER\_TC\_NE

Y;REACTOME\_GENERIC\_TRANSCRIPTION\_PATHWAY;REACTOME\_METABOLISM\_OF\_LIPIDS\_  
Y;REACTOME\_GENERIC\_TRANSCRIPTION\_PATHWAY;REACTOME\_METABOLISM\_OF\_LIPIDS\_

MISSION\_IN\_THE\_POSTSYNAPTIC\_CELL;REACTOME\_AXON\_GUIDANCE;REACTOME\_TRAFFI





TIDE\_EXCISION\_REPAIR;REACTOME\_FORMATION\_OF\_RNA\_POL\_II\_ELONGATION\_COMPLE>

DOWNSTREAM\_SIGNALING;REACTOME\_CD28\_DEPENDENT\_VAV1\_PATHWAY;REACTOME\_COS



\_LOSS\_OF\_NLP\_FROM\_MITOTIC\_CENTROSOMES;REACTOME\_PLC\_BETA\_MEDIATED\_EVENT

D\_SYNTHESIS;REACTOME\_DNA\_REPLICATION;REACTOME\_TELOMERE\_MAINTENANCE;REA  
D\_SYNTHESIS;REACTOME\_DNA\_REPLICATION;REACTOME\_TELOMERE\_MAINTENANCE;REA  
D\_SYNTHESIS;REACTOME\_DNA\_REPLICATION;REACTOME\_TELOMERE\_MAINTENANCE;REA

ROM\_THE\_PLASMA\_MEMBRANE;REACTOME\_SIGNALLING\_TO\_ERKS;REACTOME\_SIGNALING

;TOME\_GPCR\_LIGAND\_BINDING;REACTOME\_PLATELET\_HOMEOSTASIS;REACTOME\_AQUAP  
;TOME\_GPCR\_LIGAND\_BINDING;REACTOME\_PLATELET\_HOMEOSTASIS;REACTOME\_AQUAP

ING;REACTOME\_TRAF6\_MEDIATED\_NFKB\_ACTIVATION;REACTOME\_TRAF6\_MEDIATED\_INDI

IME\_DNA\_STRAND\_ELONGATION











OLIPID\_METABOLISM;REACTOME\_GASTRIN\_CREB\_SIGNALLING\_PATHWAY\_VIA\_PKC\_AND\_M

CTION;REACTOME\_HOST\_INTERACTIONS\_OF\_HIV\_FACTORS;REACTOME\_THE\_ROLE\_OF\_NE

RKA\_FROM\_THE\_PLASMA\_MEMBRANE;REACTOME\_SIGNALING\_BY\_FGFR\_IN\_DISEASE;REA

\_BY\_ILS;REACTOME\_IL1\_SIGNALING;REACTOME\_IRAK1\_RECRUITS\_IKK\_COMPLEX;REACTO

IONS;REACTOME\_PLATELET\_AGGREGATION\_PLUG\_FORMATION;REACTOME\_APOPTOSIS;F

.SIGNALING\_BY\_FGFR;REACTOME\_PI3K\_CASCADE

\_BY\_ILS;REACTOME\_IL1\_SIGNALING;REACTOME\_IRAK1\_RECRUITS\_IKK\_COMPLEX;REACTO

TION\_AND\_REPLICATION;REACTOME\_NONSENSE\_MEDIATED\_DECAY\_ENHANCED\_BY\_THE\_

ED\_ANTIGEN\_PROCESSING\_PRESENTATION





ADP\_SIGNALLING\_THROUGH\_P2RY12;REACTOME\_GABA\_B\_RECEPTOR\_ACTIVATION;REAC

ON\_OF\_CYCLIN\_B;REACTOME\_CONVERSION\_FROM\_APC\_C\_CDC20\_TO\_APC\_C\_CDH1\_IN\_L/

,SIS;REACTOME\_IMMUNE\_SYSTEM;REACTOME\_CYTOKINE\_SIGNALING\_IN\_IMMUNE\_SYSTEM

REACTOME\_MAP\_KINASE\_ACTIVATION\_IN\_TLR\_CASCADE;REACTOME\_JNK\_C\_JUN\_KINASES\_





PLATELET\_ACTIVATION\_SIGNALING\_AND\_AGGREGATION

ACTOME\_SIGNAL\_TRANSDUCTION\_BY\_L1;REACTOME\_RECYCLING\_PATHWAY\_OF\_L1;REAC

ED\_ANTIGEN\_PROCESSING\_PRESENTATION

ACTOME\_G2\_M\_DNA\_DAMAGE\_CHECKPOINT

ACTIVATION\_EVENTS;REACTOME\_SIGNALLING\_TO\_RAS;REACTOME\_CELL\_SURFACE\_INTERA





.RBOHYDRATES;REACTOME\_INFLUENZA\_LIFE\_CYCLE;REACTOME\_NEP\_NS2\_INTERACTS\_W

EAM\_SIGNALING\_EVENTS\_OF\_B\_CELL\_RECEPTOR\_BCR;REACTOME\_SIGNALING\_BY\_THE\_I

OLIPID\_METABOLISM;REACTOME\_GASTRIN\_CREB\_SIGNALLING\_PATHWAY\_VIA\_PKC\_AND\_M

3AND\_BINDING\_AND\_ACTIVATION;REACTOME\_FGFR4\_LIGAND\_BINDING\_AND\_ACTIVATION;

4M\_INTERACTIONS;REACTOME\_SIGNAL\_TRANSDUCTION\_BY\_L1;REACTOME\_HEMOSTASIS;

IGNALLING\_THROUGH\_PLC\_BETA;REACTOME\_GPCR\_DOWNSTREAM\_SIGNALING;REACTOM

\_BY\_ILS;REACTOME\_IL1\_SIGNALING;REACTOME\_IRAK1\_RECRUITS\_IKK\_COMPLEX;REACTO

ROUGH\_NMDA\_RECEPTOR;REACTOME\_ACTIVATION\_OF\_NMDA\_RECEPTOR\_UPON\_GlutAM

PLICATION;REACTOME\_TELOMERE\_MAINTENANCE;REACTOME\_EXTENSION\_OF\_TELOMERE

BETA\_MEDIATED\_EVENTS;REACTOME\_ELEVATION\_OF\_CYTOSOLIC\_CA2\_LEVELS;REACTOM





/WITH\_THE\_CELLULAR\_EXPORT\_MACHINERY;REACTOME\_HIV\_INFECTION;REACTOME\_TRAN:

ATION\_OF\_NMDA\_RECEPTOR\_UPON\_Glutamate\_BINDING\_AND\_POSTSYNAPTIC\_EVENTS;  
CID\_SIGNALLING;REACTOME\_DARPP\_32\_EVENTS;REACTOME\_G1\_PHASE;REACTOME\_G1\_S



\_PHOSPHORYLATION\_AND\_ACTIVATION\_MEDIATED\_BY\_ACTIVATED\_HUMAN\_TAK1;REACTO



ME\_DOWNSTREAM\_SIGNAL\_TRANSDUCTION;REACTOME\_REGULATION\_OF\_INSULIN\_SECR

DUCTION;REACTOME\_CD28\_CO\_STIMULATION;REACTOME\_COSTIMULATION\_BY\_THE\_CD28.  
DUCTION;REACTOME\_CD28\_CO\_STIMULATION;REACTOME\_COSTIMULATION\_BY\_THE\_CD28.

\_PRE\_REPLICATIVE\_COMPLEX;REACTOME\_DNA\_REPLICATION;REACTOME\_E2F\_MEDIATED\_

MAPK;REACTOME\_SIGNALING\_BY\_FGFR1\_MUTANTS;REACTOME\_SYNTHESIS\_OF\_PIPS\_AT\_





ED\_ON\_PLASMA\_MEMBRANE;REACTOME\_INNATE\_IMMUNE\_SYSTEM;REACTOME\_ACTIVATI







MAPK;REACTOME\_SIGNALING\_BY\_FGFR1\_MUTANTS;REACTOME\_SYNTHESIS\_OF\_PIPS\_AT\_  
MAPK;REACTOME\_SIGNALING\_BY\_FGFR1\_MUTANTS;REACTOME\_SYNTHESIS\_OF\_PIPS\_AT\_

ENTS;REACTOME\_G\_ALPHA\_Z\_SIGNALLING\_EVENTS;REACTOME\_SIGNAL\_AMPLIFICATION;F

.CTIONS\_AT\_THE\_VASCULAR\_WALL;REACTOME\_NGF\_SIGNALLING\_VIA\_TRKA\_FROM\_THE\_I  
E\_SIGNALING\_BY\_PDGF;REACTOME\_DOWNSTREAM\_SIGNAL\_TRANSDUCTION;REACTOME\_





ACTOME\_DOWNSTREAM\_SIGNAL\_TRANSDUCTION;REACTOME\_TRAFFICKING\_OF\_AMPA\_R





:ACTOME\_DNA\_STRAND\_ELONGATION

.OBAL\_GENOMIC\_NER\_GG\_NER;REACTOME\_FORMATION\_OF\_INCISION\_COMPLEX\_IN\_GG\_I









'38\_VIA\_RIT\_AND\_RIN;REACTOME\_GASTRIN\_CREB\_SIGNALLING\_PATHWAY\_VIA\_PKC\_AND\_

IBRANE;REACTOME\_INNATE\_IMMUNE\_SYSTEM;REACTOME\_ACTIVATED\_TLR4\_SIGNALLING;





ME\_G\_PROTEIN\_BETA\_GAMMA\_SIGNALLING;REACTOME\_ACTIVATION\_OF\_KAINATE\_RECEP

;REACTOME\_TRAF6\_MEDIATED\_IRF7\_ACTIVATION;REACTOME\_CIRCADIAN\_CLOCK;REACTC



ATE\_ANAPHASE;REACTOME\_IMMUNE\_SYSTEM;REACTOME\_PHOSPHORYLATION\_OF\_THE\_A

\_COSTIMULATION\_BY\_THE\_CD28\_FAMILY;REACTOME\_CD28\_DEPENDENT\_PI3K\_AKT\_SIGNA







'\_PDGF;REACTOME\_DOWNSTREAM\_SIGNAL\_TRANSDUCTION;REACTOME\_PI\_3K\_CASCADE;

\_AND\_POSTSYNAPTIC\_EVENTS;REACTOME\_CREB\_PHOSPHORYLATION\_THROUGH\_THE\_AC

REACTOME\_PD1\_SIGNALING;REACTOME\_COSTIMULATION\_BY\_THE\_CD28\_FAMILY;REACTOM



/WITH\_THE\_CELLULAR\_EXPORT\_MACHINERY;REACTOME\_HIV\_INFECTIION;REACTOME\_TRAN:

IN;REACTOME\_AKT\_PHOSPHORYLATES\_TARGETS\_IN\_THE\_CYTOSOL;REACTOME\_GAB1\_SI





INE\_SYSTEM;REACTOME\_CYTOKINE\_SIGNALING\_IN\_IMMUNE\_SYSTEM

EB\_SIGNALLING\_PATHWAY\_VIA\_PKC\_AND\_MAPK;REACTOME\_SHC1\_EVENTS\_IN\_EGFR\_SIC







\\_TRKA\_FROM\_THE\_PLASMA\_MEMBRANE;REACTOME\_SIGNALING\_BY\_FGFR\_IN\_DISEASE;R







JNE\_SYSTEM;REACTOME\_ACTIVATED\_TLR4\_SIGNALLING;REACTOME\_IMMUNE\_SYSTEM;RE

\_POSTSYNAPTIC\_CELL;REACTOME\_PLC\_BETA\_MEDIATED\_EVENTS;REACTOME\_PKA\_MEDIA

BOXYLASE\_ODC;REACTOME\_REGULATION\_OF\_APOPTOSIS;REACTOME\_CELL\_CYCLE\_MITC  
\_PRE\_REPLICATIVE\_COMPLEX;REACTOME\_DNA\_REPLICATION;REACTOME\_E2F\_MEDIATED\_

'ION\_BY\_L1;REACTOME\_SIGNALING\_BY\_INSULIN\_RECEPTOR;REACTOME\_FGFR\_LIGAND\_BI  
'ION\_BY\_L1;REACTOME\_SIGNALING\_BY\_INSULIN\_RECEPTOR;REACTOME\_FGFR\_LIGAND\_BI





\_COSTIMULATION\_BY\_THE\_CD28\_FAMILY;REACTOME\_CD28\_DEPENDENT\_PI3K\_AKT\_SIGNA





BOXYLASE\_ODC;REACTOME\_REGULATION\_OF\_APOPTOSIS;REACTOME\_CELL\_CYCLE\_MITC

CKING\_OF\_AMPA\_RECEPTORS;REACTOME\_TRAFFICKING\_OF\_GLUR2\_CONTAINING\_AMPA\_

ION;REACTOME\_ADVANCED\_GLYCOSYLATION\_ENDPRODUCT\_RECEPTOR\_SIGNALING;REA

LL\_DEATH\_SIGNALLING\_VIA\_NRAGE\_NRIF\_AND\_NADE;REACTOME\_P75\_NTR\_RECEPTOR\_M

S;REACTOME\_S\_PHASE;REACTOME\_DNA\_STRAND\_ELONGATION

NEF\_IN\_HIV1\_REPLICATION\_AND\_DISEASE\_PATHOGENESIS;REACTOME\_IMMUNE\_SYSTEM;

\_POSTSYNAPTIC\_CELL;REACTOME\_PLC\_BETA\_MEDIATED\_EVENTS;REACTOME\_PKA\_MEDIA



:ACTOME\_DNA\_STRAND\_ELONGATION



ACTOME\_ENOS\_ACTIVATION\_AND\_REGULATION;REACTOME\_NEGATIVE\_REGULATION\_OF\_1

ME\_G\_PROTEIN\_BETA\_GAMMA\_SIGNALLING;REACTOME\_ACTIVATION\_OF\_KAINATE\_RECEP





CH\_HLH\_TRANSCRIPTION\_PATHWAY;REACTOME\_METABOLISM\_OF\_LIPIDS\_AND\_LIPOPROT  
CH\_HLH\_TRANSCRIPTION\_PATHWAY;REACTOME\_METABOLISM\_OF\_LIPIDS\_AND\_LIPOPROT  
CH\_HLH\_TRANSCRIPTION\_PATHWAY;REACTOME\_METABOLISM\_OF\_LIPIDS\_AND\_LIPOPROT  
\_POSTSYNAPTIC\_CELL;REACTOME\_PLC\_BETA\_MEDIATED\_EVENTS;REACTOME\_PKA\_MEDIA

/ITH\_THE\_CELLULAR\_EXPORT\_MACHINERY;REACTOME\_HIV\_INFECTIION;REACTOME\_TRAN:

/WITH\_THE\_CELLULAR\_EXPORT\_MACHINERY;REACTOME\_HIV\_INFECTION;REACTOME\_TRAN:

R\_REPAIR\_COMPLEX;REACTOME\_DNA\_REPAIR;REACTOME\_RNA\_POL\_II\_PRE\_TRANSCRIPT

\_AND\_LIPOPROTEINS;REACTOME\_FATTY\_ACID\_TRIACYLGLYCEROL\_AND\_KETONE\_BODY\_M  
\_AND\_LIPOPROTEINS;REACTOME\_FATTY\_ACID\_TRIACYLGLYCEROL\_AND\_KETONE\_BODY\_M

CKING\_OF\_AMPA\_RECEPTORS;REACTOME\_TRAFFICKING\_OF\_GLUR2\_CONTAINING\_AMPA\_





←;REACTOME\_ELONGATION\_ARREST\_AND\_RECOVERY;REACTOME\_FORMATION\_OF\_TRAN

→STIMULATION\_BY\_THE\_CD28\_FAMILY;REACTOME\_SIGNALING\_BY\_ILS;REACTOME\_REGULAT



^S;REACTOME\_PKA\_MEDIATED\_PHOSPHORYLATION\_OF\_CREB;REACTOME\_TRANSMEMBR/

.CTOME\_REMOVAL\_OF\_THE\_FLAP\_INTERMEDIATE\_FROM\_THE\_C\_STRAND;REACTOME\_EX1  
.CTOME\_REMOVAL\_OF\_THE\_FLAP\_INTERMEDIATE\_FROM\_THE\_C\_STRAND;REACTOME\_EX1  
.CTOME\_REMOVAL\_OF\_THE\_FLAP\_INTERMEDIATE\_FROM\_THE\_C\_STRAND;REACTOME\_EX1

3\_BY\_FGFR\_IN\_DISEASE;REACTOME\_SIGNALING\_BY\_FGFR1\_MUTANTS;REACTOME\_SIGNAL

'ORIN\_MEDIATED\_TRANSPORT;REACTOME\_PROSTACYCLIN\_SIGNALLING\_THROUGH\_PROS  
'ORIN\_MEDIATED\_TRANSPORT;REACTOME\_PROSTACYCLIN\_SIGNALLING\_THROUGH\_PROS

UCTION\_OF\_NFKB\_AND\_MAP\_KINASES\_UPON\_TLR7\_8\_OR\_9\_ACTIVATION;REACTOME\_ADV













MAPK;REACTOME\_SIGNALING\_BY\_FGFR1\_MUTANTS;REACTOME\_SYNTHESIS\_OF\_PIPS\_AT\_

EF\_IN\_HIV1\_REPLICATION\_AND\_DISEASE\_PATHOGENESIS;REACTOME\_IMMUNE\_SYSTEM;RI

ACTOME\_ENOS\_ACTIVATION\_AND\_REGULATION;REACTOME\_NEGATIVE\_REGULATION\_OF\_1

ME\_TRAF6\_MEDIATED\_INDUCION\_OF\_NFKB\_AND\_MAP\_KINASES\_UPON\_TLR7\_8\_OR\_9\_AC

REACTOME\_HEMOSTASIS;REACTOME\_PLATELET\_ACTIVATION\_SIGNALING\_AND\_AGGREGA

ME\_TRAF6\_MEDIATED\_INDUCION\_OF\_NFKB\_AND\_MAP\_KINASES\_UPON\_TLR7\_8\_OR\_9\_AC

\_EXON\_JUNCTION\_COMPLEX





TOME\_GABA\_RECEPTOR\_ACTIVATION;REACTOME\_HEMOSTASIS;REACTOME\_PLATELET\_AC

ATE\_ANAPHASE;REACTOME\_IMMUNE\_SYSTEM;REACTOME\_PHOSPHORYLATION\_OF\_THE\_A

1

\_PHOSPHORYLATION\_AND\_ACTIVATION\_MEDIATED\_BY\_ACTIVATED\_HUMAN\_TAK1;REACTO







TOME\_INFLUENZA\_LIFE\_CYCLE;REACTOME\_IMMUNE\_SYSTEM;REACTOME\_ADAPTIVE\_IMML



.CTIONS\_AT\_THE\_VASCULAR\_WALL;REACTOME\_NGF\_SIGNALLING\_VIA\_TRKA\_FROM\_THE\_I





/WITH\_THE\_CELLULAR\_EXPORT\_MACHINERY;REACTOME\_HIV\_INFECTION;REACTOME\_TRAN:



MAPK;REACTOME\_SIGNALING\_BY\_FGFR1\_MUTANTS;REACTOME\_SYNTHESIS\_OF\_PIPS\_AT\_

REACTOME\_SIGNALING\_BY\_FGFR;REACTOME\_PI3K\_CASCADE

REACTOME\_IMMUNE\_SYSTEM;REACTOME\_ADAPTIVE\_IMMUNE\_SYSTEM

ME\_G\_PROTEIN\_BETA\_GAMMA\_SIGNALLING;REACTOME\_ACTIVATION\_OF\_KAINATE\_RECEP

ME\_TRAF6\_MEDIATED\_INDUCTION\_OF\_NFKB\_AND\_MAP\_KINASES\_UPON\_TLR7\_8\_OR\_9\_AC

ATE\_BINDING\_AND\_POSTSYNAPTIC\_EVENTS;REACTOME\_CREB\_PHOSPHORYLATION\_THR(

S;REACTOME\_S\_PHASE;REACTOME\_DNA\_STRAND\_ELONGATION

E\_SIGNALING\_BY\_PDGF;REACTOME\_DOWNSTREAM\_SIGNAL\_TRANSDUCTION;REACTOME\_





SPORT\_OF\_RIBONUCLEOPROTEINS\_INTO\_THE\_HOST\_NUCLEUS;REACTOME\_HIV\_LIFE\_CYC

;REACTOME\_POST\_NMDA\_RECEPTOR\_ACTIVATION\_EVENTS;REACTOME\_DOWNSTREAM\_S  
;\_TRANSITION;REACTOME\_COSTIMULATION\_BY\_THE\_CD28\_FAMILY;REACTOME\_CTLA4\_INF



ME\_ACTIVATED\_TAK1\_MEDIATES\_P38\_MAPK\_ACTIVATION;REACTOME\_SIGNALING\_BY\_ILS;



REGULATION\_BY\_GLCAGON\_LIKE\_PEPTIDE1;REACTOME\_REGULATION\_OF\_INSULIN\_SECRETION

\_FAMILY;REACTOME\_CD28\_DEPENDENT\_PI3K\_AKT\_SIGNALING;REACTOME\_PI\_3K\_CASCAD  
\_FAMILY;REACTOME\_CD28\_DEPENDENT\_PI3K\_AKT\_SIGNALING;REACTOME\_PI\_3K\_CASCAD

\_REGULATION\_OF\_DNA\_REPLICATION;REACTOME\_ACTIVATION\_OF\_ATR\_IN\_RESPONSE\_TC

THE\_PLASMA\_MEMBRANE;REACTOME\_SIGNALING\_BY\_FGFR1\_FUSION\_MUTANTS;REACTO





ED\_TLR4\_SIGNALLING;REACTOME\_IMMUNE\_SYSTEM;REACTOME\_TOLL\_RECEPTOR\_CASCA







THE\_PLASMA\_MEMBRANE;REACTOME\_SIGNALING\_BY\_FGFR1\_FUSION\_MUTANTS;REACTO  
THE\_PLASMA\_MEMBRANE;REACTOME\_SIGNALING\_BY\_FGFR1\_FUSION\_MUTANTS;REACTO

REACTOME\_ADP\_SIGNALLING\_THROUGH\_P2RY12;REACTOME\_GABA\_B\_RECEPTOR\_ACTIV/

PLASMA\_MEMBRANE;REACTOME\_SIGNALLING\_TO\_ERKS;REACTOME\_P38MAPK\_EVENTS;RE  
REGULATION\_OF\_INSULIN\_SECRETION\_BY\_GLUCAGON\_LIKE\_PEPTIDE1;REACTOME\_G\_ALI





ECEPTORS;REACTOME\_TRAFFICKING\_OF\_GLUR2\_CONTAINING\_AMPA\_RECEPTORS;REACT







NER;REACTOME\_HIV\_INFECTION;REACTOME\_HIV\_LIFE\_CYCLE;REACTOME\_FORMATION\_OF









MAPK;REACTOME\_SHC1\_EVENTS\_IN\_EGFR\_SIGNALING;REACTOME\_SIGNALING\_BY\_GPCR;

;REACTOME\_IMMUNE\_SYSTEM;REACTOME\_TOLL\_RECEPTOR\_CASCADES





TORS\_UPON\_Glutamate\_BINDING

ME\_FACTORS\_INVOLVED\_IN\_MEGAKARYOCYTE\_DEVELOPMENT\_AND\_PLATELET\_PRODUC



\\PC\_C;REACTOME\_ADAPTIVE\_IMMUNE\_SYSTEM;REACTOME\_CLASS\_I\_MHC\_MEDIATED\_AN

...LING;REACTOME\_PI\_3K\_CASCADE;REACTOME\_DOWNSTREAM\_SIGNALING\_OF\_ACTIVATED







;REACTOME\_DOWNSTREAM\_SIGNALING\_OF\_ACTIVATED\_FGFR;REACTOME\_ROLE\_OF\_DCC

CTIVATION\_OF\_RAS;REACTOME\_POST\_NMDA\_RECEPTOR\_ACTIVATION\_EVENTS;REACTOM

E\_CD28\_DEPENDENT\_PI3K\_AKT\_SIGNALING;REACTOME\_CTLA4\_INHIBITORY\_SIGNALING;RE



SPORT\_OF\_RIBONUCLEOPROTEINS\_INTO\_THE\_HOST\_NUCLEUS;REACTOME\_HIV\_LIFE\_CYC

GNALOSOME;REACTOME\_REGULATION\_OF\_BETA\_CELL\_DEVELOPMENT;REACTOME\_REGL







IGNALING;REACTOME\_TRANSMISSION\_ACROSS\_CHEMICAL\_SYNAPSES;REACTOME\_NEURON







:EACTOME\_PHOSPHOLIPID\_METABOLISM;REACTOME\_GASTRIN\_CREB\_SIGNALLING\_PATHW







ACTOME\_TOLL\_RECEPTOR\_CASCADES;REACTOME\_NOD1\_2\_SIGNALING\_PATHWAY;REACT

ACTED\_PHOSPHORYLATION\_OF\_CREB;REACTOME\_TRANSMEMBRANE\_TRANSPORT\_OF\_SMA

OTIC;REACTOME\_CELL\_CYCLE\_CHECKPOINTS;REACTOME\_CYCLIN\_E\_ASSOCIATED\_EVENT  
\_REGULATION\_OF\_DNA\_REPLICATION;REACTOME\_ACTIVATION\_OF\_ATR\_IN\_RESPONSE\_TC

NDING\_AND\_ACTIVATION;REACTOME\_SIGNALING\_BY\_FGFR;REACTOME\_FGFR1\_LIGAND\_B  
NDING\_AND\_ACTIVATION;REACTOME\_SIGNALING\_BY\_FGFR;REACTOME\_FGFR1\_LIGAND\_B





...SIGNALING;REACTOME\_PI\_3K\_CASCADE;REACTOME\_DOWNSTREAM\_SIGNALING\_OF\_ACTIVATED





OTIC;REACTOME\_CELL\_CYCLE\_CHECKPOINTS;REACTOME\_CYCLIN\_E\_ASSOCIATED\_EVENT

.RECEPTORS;REACTOME\_L1CAM\_INTERACTIONS;REACTOME\_SIGNAL\_TRANSDUCTION\_BY\_

CTOME\_NFKB\_AND\_MAP\_KINASES\_ACTIVATION\_MEDIATED\_BY\_TLR4\_SIGNALING\_REPERTO

EDIATED\_SIGNALLING;REACTOME\_SIGNALING\_BY\_PDGF;REACTOME\_DOWNSTREAM\_SIGN



REACTOME\_BINDING\_AND\_ENTRY\_OF\_HIV\_VIRION;REACTOME\_ADAPTIVE\_IMMUNE\_SYSTE

ACTED\_PHOSPHORYLATION\_OF\_CREB;REACTOME\_TRANSMEMBRANE\_TRANSPORT\_OF\_SMA







THE\_PI3K\_AKT\_NETWORK;REACTOME\_PI3K\_AKT\_ACTIVATION;REACTOME\_AKT\_PHOSPHOF

TORS\_UPON\_Glutamate\_BINDING





TEINS;REACTOME\_FATTY\_ACID\_TRIACYLGLYCEROL\_AND\_KETONE\_BODY\_METABOLISM;RE  
TEINS;REACTOME\_FATTY\_ACID\_TRIACYLGLYCEROL\_AND\_KETONE\_BODY\_METABOLISM;RE  
TEINS;REACTOME\_FATTY\_ACID\_TRIACYLGLYCEROL\_AND\_KETONE\_BODY\_METABOLISM;RE  
CTED\_PHOSPHORYLATION\_OF\_CREB;REACTOME\_TRANSMEMBRANE\_TRANSPORT\_OF\_SMA



SPORT\_OF\_RIBONUCLEOPROTEINS\_INTO\_THE\_HOST\_NUCLEUS;REACTOME\_HIV\_LIFE\_CYC

ION\_EVENTS;REACTOME\_INFLUENZA\_LIFE\_CYCLE;REACTOME\_INFLUENZA\_VIRAL\_RNA\_TF

METABOLISM;REACTOME\_CIRCADIAN\_CLOCK;REACTOME\_TRANSCRIPTIONAL\_REGULATION  
METABOLISM;REACTOME\_CIRCADIAN\_CLOCK;REACTOME\_TRANSCRIPTIONAL\_REGULATION

RECEPTORS;REACTOME\_L1CAM\_INTERACTIONS;REACTOME\_SIGNAL\_TRANSDUCTION\_BY\_





DESCRIPTION\_COUPLED\_NER\_TC\_NER\_REPAIR\_COMPLEX;REACTOME\_RNA\_POL\_I\_RNA\_POI

TION\_OF\_SIGNALING\_BY\_CBL;REACTOME\_IL\_3\_5\_AND\_GM-CSF\_SIGNALING;REACTOME\_HE



ANE\_TRANSPORT\_OF\_SMALL\_MOLECULES;REACTOME\_GLUCAGON\_SIGNALING\_IN\_METABO

TENSION\_OF\_TELOMERES;REACTOME\_S\_PHASE;REACTOME\_DNA\_STRAND\_ELONGATION  
TENSION\_OF\_TELOMERES;REACTOME\_S\_PHASE;REACTOME\_DNA\_STRAND\_ELONGATION  
TENSION\_OF\_TELOMERES;REACTOME\_S\_PHASE;REACTOME\_DNA\_STRAND\_ELONGATION

.ING\_BY\_FGFR1\_FUSION\_MUTANTS;REACTOME\_SIGNALING\_BY\_FGFR\_MUTANTS;REACTOM

TACYCLIN\_RECEPTOR;REACTOME\_REGULATION\_OF\_WATER\_BALANCE\_BY\_RENAL\_AQUAF  
TACYCLIN\_RECEPTOR;REACTOME\_REGULATION\_OF\_WATER\_BALANCE\_BY\_RENAL\_AQUAF

ANCED\_GLYCOSYLATION\_ENDPRODUCT\_RECEPTOR\_SIGNALING;REACTOME\_NFKB\_AND\_I













THE\_PLASMA\_MEMBRANE;REACTOME\_SIGNALING\_BY\_FGFR1\_FUSION\_MUTANTS;REACTO

EACTOME\_ADAPTIVE\_IMMUNE\_SYSTEM;REACTOME\_CYTOKINE\_SIGNALING\_IN\_IMMUNE\_SY

THE\_PI3K\_AKT\_NETWORK;REACTOME\_PI3K\_AKT\_ACTIVATION;REACTOME\_AKT\_PHOSPHOF

ACTIVATION;REACTOME\_TRAF6\_MEDIATED\_IRF7\_ACTIVATION\_IN\_TLR7\_8\_OR\_9\_SIGNALING;

TION;REACTOME\_APOPTOTIC\_EXECUTION\_PHASE

ACTIVATION;REACTOME\_TRAF6\_MEDIATED\_IRF7\_ACTIVATION\_IN\_TLR7\_8\_OR\_9\_SIGNALING;







ACTIVATION\_SIGNALING\_AND\_AGGREGATION

APC\_C;REACTOME\_ADAPTIVE\_IMMUNE\_SYSTEM;REACTOME\_CLASS\_I\_MHC\_MEDIATED\_AN

ME\_ACTIVATED\_TAK1\_MEDIATES\_P38\_MAPK\_ACTIVATION;REACTOME\_SIGNALING\_BY\_ILS;







JNE\_SYSTEM;REACTOME\_GAP\_JUNCTION\_TRAFFICKING



PLASMA\_MEMBRANE;REACTOME\_SIGNALLING\_TO\_ERKS;REACTOME\_P38MAPK\_EVENTS;RE





SPORT\_OF\_RIBONUCLEOPROTEINS\_INTO\_THE\_HOST\_NUCLEUS;REACTOME\_HIV\_LIFE\_CYC

EMBRANE;REACTOME\_SIGNALING\_BY\_FGFR\_IN\_DISEASE;REACTOME\_NEGATIVE\_REGULA

THE\_PLASMA\_MEMBRANE;REACTOME\_SIGNALING\_BY\_FGFR1\_FUSION\_MUTANTS;REACTO



TORS\_UPON\_Glutamate\_BINDING

ACTIVATION;REACTOME\_TRAF6\_MEDIATED\_IRF7\_ACTIVATION\_IN\_TLR7\_8\_OR\_9\_SIGNALING;

OUGH\_THE\_ACTIVATION\_OF\_RAS;REACTOME\_POST\_NMDA\_RECEPTOR\_ACTIVATION\_EVEN

.REGULATION\_OF\_INSULIN\_SECRETION\_BY\_GLUCAGON\_LIKE\_PEPTIDE1;REACTOME\_G\_ALI





);REACTOME\_HOST\_INTERACTIONS\_OF\_HIV\_FACTORS;REACTOME\_LATE\_PHASE\_OF\_HI

IGNALING\_OF\_ACTIVATED\_FGFR;REACTOME\_PHOSPHOLIPASE\_C\_MEDIATED\_CASCADE;RE  
HIBITORY\_SIGNALING;REACTOME\_METABOLISM\_OF\_MRNA;REACTOME\_METABOLISM\_OF\_R



REACTOME\_IL1\_SIGNALING;REACTOME\_IRAK1\_RECRUITS\_IKK\_COMPLEX;REACTOME\_TRAI



∩;REACTOME\_DOWNSTREAM\_SIGNALING\_OF\_ACTIVATED\_FGFR;REACTOME\_PHOSPHOLIP/

E;REACTOME\_DOWNSTREAM\_SIGNALING\_OF\_ACTIVATED\_FGFR;REACTOME\_PKB\_MEDIAT  
E;REACTOME\_DOWNSTREAM\_SIGNALING\_OF\_ACTIVATED\_FGFR;REACTOME\_PKB\_MEDIAT

)\_REPLICATION\_STRESS;REACTOME\_G1\_S\_SPECIFIC\_TRANSCRIPTION;REACTOME\_G2\_M\_

ME\_PI\_METABOLISM;REACTOME\_SIGNALING\_BY\_FGFR\_MUTANTS;REACTOME\_PI3K\_AKT\_A





.DES;REACTOME\_APOPTOTIC\_EXECUTION\_PHASE







ME\_PI\_METABOLISM;REACTOME\_SIGNALING\_BY\_FGFR\_MUTANTS;REACTOME\_PI3K\_AKT\_A  
ME\_PI\_METABOLISM;REACTOME\_SIGNALING\_BY\_FGFR\_MUTANTS;REACTOME\_PI3K\_AKT\_A

ATION;REACTOME\_GABA\_RECEPTOR\_ACTIVATION;REACTOME\_HEMOSTASIS;REACTOME\_P

REACTOME\_SIGNALING\_BY\_FGFR\_IN\_DISEASE;REACTOME\_SIGNALLING\_TO\_P38\_VIA\_RIT\_AND  
RHOA\_Q\_SIGNALLING\_EVENTS;REACTOME\_REGULATION\_OF\_INSULIN\_SECRETION;REACTOME





OME\_GPCR\_DOWNSTREAM\_SIGNALING;REACTOME\_G\_ALPHA\_Z\_SIGNALLING\_EVENTS;RE







=\_THE\_HIV1\_EARLY\_ELONGATION\_COMPLEX;REACTOME\_LATE\_PHASE\_OF\_HIV\_LIFE\_CYCL









REACTOME\_SIGNALING\_BY\_PDGF;REACTOME\_DOWNSTREAM\_SIGNAL\_TRANSDUCTION;RE





:TION;REACTOME\_TRAF3\_DEPENDENT\_IRF\_ACTIVATION\_PATHWAY;REACTOME\_RIG\_I\_MDA



TIGEN\_PROCESSING\_PRESENTATION;REACTOME\_ANTIGEN\_PROCESSING\_UBIQUITINATION

)\_FGFR;REACTOME\_IMMUNE\_SYSTEM;REACTOME\_ADAPTIVE\_IMMUNE\_SYSTEM;REACTOMI







:\_IN\_REGULATING\_APOPTOSIS;REACTOME\_APOPTOSIS;REACTOME\_INNATE\_IMMUNE\_SYS

E\_MAP\_KINASE\_ACTIVATION\_IN\_TLR\_CASCADE;REACTOME\_MAPK\_TARGETS\_NUCLEAR\_E'

REACTOME\_SIGNALING\_BY\_ILS;REACTOME\_IL\_2\_SIGNALING;REACTOME\_HEMOSTASIS;REAC



FILE;REACTOME\_HOST\_INTERACTIONS\_OF\_HIV\_FACTORS;REACTOME\_LATE\_PHASE\_OF\_HI

ILATION\_OF\_GENE\_EXPRESSION\_IN\_BETA\_CELLS;REACTOME\_SIGNALING\_BY\_GPCR;REAC







VAL\_SYSTEM;REACTOME\_SIGNALING\_BY\_GPCR;REACTOME\_NEUROTRANSMITTER\_RECEP







VAY\_VIA\_PKC\_AND\_MAPK;REACTOME\_SIGNALING\_BY\_FGFR1\_MUTANTS;REACTOME\_SYNTI









ALL\_MOLECULES;REACTOME\_GLCAGON\_SIGNALING\_IN\_METABOLIC\_REGULATION;REACT

S\_DURING\_G1\_S\_TRANSITION\_;REACTOME\_P53\_DEPENDENT\_G1\_DNA\_DAMAGE\_RESPON  
S\_REPLICATION\_STRESS;REACTOME\_G2\_M\_CHECKPOINTS;REACTOME\_S\_PHASE

INDING\_AND\_ACTIVATION;REACTOME\_PI3K\_CASCADE  
INDING\_AND\_ACTIVATION;REACTOME\_PI3K\_CASCADE





)\_FGFR;REACTOME\_IMMUNE\_SYSTEM;REACTOME\_ADAPTIVE\_IMMUNE\_SYSTEM;REACTOMI





S\_DURING\_G1\_S\_TRANSITION\_;REACTOME\_P53\_DEPENDENT\_G1\_DNA\_DAMAGE\_RESPON

\_L1;REACTOME\_RECYCLING\_PATHWAY\_OF\_L1;REACTOME\_HIV\_INFECTION;REACTOME\_HC

OIRE;REACTOME\_RIG\_I\_MDA5\_MEDIATED\_INDUCTION\_OF\_IFN\_ALPHA\_BETA\_PATHWAYS;R

IAL\_TRANSDUCTION;REACTOME\_PI\_3K\_CASCADE;REACTOME\_DOWNSTREAM\_SIGNALING\_



EM







PHOSPHORYLATES\_TARGETS\_IN\_THE\_CYTOSOL;REACTOME\_GAB1\_SIGNALOSOME;REACTOME\_INTE





ACTOME\_TRAF6\_MEDIATED\_IRF7\_ACTIVATION;REACTOME\_CIRCADIAN\_CLOCK;REACTOME  
ACTOME\_TRAF6\_MEDIATED\_IRF7\_ACTIVATION;REACTOME\_CIRCADIAN\_CLOCK;REACTOME  
ACTOME\_TRAF6\_MEDIATED\_IRF7\_ACTIVATION;REACTOME\_CIRCADIAN\_CLOCK;REACTOME  
ALL\_MOLECULES;REACTOME\_GLUCAGON\_SIGNALING\_IN\_METABOLIC\_REGULATION;REACT



FILE;REACTOME\_HOST\_INTERACTIONS\_OF\_HIV\_FACTORS;REACTOME\_LATE\_PHASE\_OF\_HI

TRANSCRIPTION\_AND\_REPLICATION;REACTOME\_HIV\_INFECTION;REACTOME\_HIV\_LIFE\_CYCLE

OF\_WHITE\_ADIPOCYTE\_DIFFERENTIATION;REACTOME\_SIGNALING\_BY\_NOTCH;REACTOME  
OF\_WHITE\_ADIPOCYTE\_DIFFERENTIATION;REACTOME\_SIGNALING\_BY\_NOTCH;REACTOME

\_L1;REACTOME\_RECYCLING\_PATHWAY\_OF\_L1;REACTOME\_HIV\_INFECTION;REACTOME\_HIV





\_III\_AND\_MITOCHONDRIAL\_TRANSCRIPTION;REACTOME\_DNA\_REPAIR;REACTOME\_RNA\_P

:MOSTASIS;REACTOME\_IMMUNE\_SYSTEM;REACTOME\_ADAPTIVE\_IMMUNE\_SYSTEM;REACT



OLIC\_REGULATION;REACTOME\_SIGNALING\_BY\_PDGF;REACTOME\_DOWNSTREAM\_SIGNAL\_





PORINS;REACTOME\_HEMOSTASIS  
PORINS;REACTOME\_HEMOSTASIS

MAP\_KINASES\_ACTIVATION\_MEDIATED\_BY\_TLR4\_SIGNALING\_REPERTOIRE;REACTOME\_RIC













ME\_PI\_METABOLISM;REACTOME\_SIGNALING\_BY\_FGFR\_MUTANTS;REACTOME\_PI3K\_AKT\_A

'STEM;REACTOME\_ANTIGEN\_PRESENTATION\_FOLDING\_ASSEMBLY\_AND\_PEPTIDE\_LOADIN

PHOSPHORYLATES\_TARGETS\_IN\_THE\_CYTOSOL;REACTOME\_GAB1\_SIGNALOSOME;REACTOME\_INTE

REACTOME\_NFKB\_AND\_MAP\_KINASES\_ACTIVATION\_MEDIATED\_BY\_TLR4\_SIGNALING\_REP



REACTOME\_NFKB\_AND\_MAP\_KINASES\_ACTIVATION\_MEDIATED\_BY\_TLR4\_SIGNALING\_REPI







TIGEN\_PROCESSING\_PRESENTATION;REACTOME\_ANTIGEN\_PROCESSING\_UBIQUITINATION

REACTOME\_IL1\_SIGNALING;REACTOME\_IRAK1\_RECRUITS\_IKK\_COMPLEX;REACTOME\_TRAI











REACTOME\_SIGNALING\_BY\_FGFR\_IN\_DISEASE;REACTOME\_SIGNALLING\_TO\_P38\_VIA\_RIT\_A





FILE;REACTOME\_HOST\_INTERACTIONS\_OF\_HIV\_FACTORS;REACTOME\_LATE\_PHASE\_OF\_HI

TION\_OF\_THE\_PI3K\_AKT\_NETWORK;REACTOME\_PI3K\_AKT\_ACTIVATION;REACTOME\_AKT\_F

ME\_PI\_METABOLISM;REACTOME\_SIGNALING\_BY\_FGFR\_MUTANTS;REACTOME\_PI3K\_AKT\_A





JTS

PHA\_Q\_SIGNALLING\_EVENTS;REACTOME\_REGULATION\_OF\_INSULIN\_SECRETION;REACTOI





V\_LIFE\_CYCLE;REACTOME\_INTERACTIONS\_OF\_VPR\_WITH\_HOST\_CELLULAR\_PROTEINS;RE

REACTOME\_SIGNALING\_BY\_FGFR

.NA;REACTOME\_MITOTIC\_G1\_G1\_S\_PHASES;REACTOME\_MITOTIC\_M\_M\_G1\_PHASES;REAC



F6\_MEDIATED\_IRF7\_ACTIVATION;REACTOME\_TRAF6\_MEDIATED\_NFKB\_ACTIVATION;REACT



ASE\_C\_MEDIATED\_CASCADE;REACTOME\_AQUAPORIN\_MEDIATED\_TRANSPORT;REACTOME

ED\_EVENTS;REACTOME\_SIGNALING\_BY\_INSULIN\_RECEPTOR;REACTOME\_IMMUNE\_SYSTEM  
ED\_EVENTS;REACTOME\_SIGNALING\_BY\_INSULIN\_RECEPTOR;REACTOME\_IMMUNE\_SYSTEM

CHECKPOINTS;REACTOME\_S\_PHASE

CTIVATION;REACTOME\_TCR\_SIGNALING;REACTOME\_DOWNSTREAM\_TCR\_SIGNALING;REA













CTIVATION;REACTOME\_TCR\_SIGNALING;REACTOME\_DOWNSTREAM\_TCR\_SIGNALING;REA  
CTIVATION;REACTOME\_TCR\_SIGNALING;REACTOME\_DOWNSTREAM\_TCR\_SIGNALING;REA

LATELET\_ACTIVATION\_SIGNALING\_AND\_AGGREGATION

RD\_RIN;REACTOME\_GASTRIN\_CREB\_SIGNALLING\_PATHWAY\_VIA\_PKC\_AND\_MAPK;REACTOME\_GPCR\_DOWNSTREAM\_SIGNALING;REACTOME\_DOWNSTREAM\_SIGNALING\_OF\_ACTIVATED





ACTOME\_DOWNSTREAM\_SIGNALING\_OF\_ACTIVATED\_FGFR;REACTOME\_PHOSPHOLIPASE\_







.E;REACTOME\_RNA\_POL\_I\_TRANSCRIPTION\_INITIATION









REACTOME\_AXON\_GUIDANCE;REACTOME\_NCAM\_SIGNALING\_FOR\_NEURITE\_OUT\_GROWTH





5\_MEDIATED\_INDUCTION\_OF\_IFN\_ALPHA\_BETA\_PATHWAYS;REACTOME\_TRANSCRIPTION/



√\_PROTEASOME\_DEGRADATION;REACTOME\_APC\_CDC20\_MEDIATED\_DEGRADATION\_OF\_N

Ξ\_PIP3\_ACTIVATES\_AKT\_SIGNALING;REACTOME\_SIGNALING\_BY\_FGFR







TEM;REACTOME\_IMMUNE\_SYSTEM;REACTOME\_ADAPTIVE\_IMMUNE\_SYSTEM;REACTOME\_N

VENTS\_MEDIATED\_BY\_MAP\_KINASES;REACTOME\_L1CAM\_INTERACTIONS;REACTOME\_SIGN

;TOME\_HIV\_INFECTION;REACTOME\_HOST\_INTERACTIONS\_OF\_HIV\_FACTORS;REACTOME\_1



V\_LIFE\_CYCLE;REACTOME\_INTERACTIONS\_OF\_VPR\_WITH\_HOST\_CELLULAR\_PROTEINS;RE

TOME\_SIGNALING\_BY\_PDGF;REACTOME\_GPVI\_MEDIATED\_ACTIVATION\_CASCADE;REACTC







TOR\_BINDING\_AND\_DOWNSTREAM\_TRANSMISSION\_IN\_THE\_POSTSYNAPTIC\_CELL;REACTO







HESIS\_OF\_PIPS\_AT\_THE\_PLASMA\_MEMBRANE;REACTOME\_SIGNALING\_BY\_FGFR1\_FUSION







MAIN\_LEUCINE\_RICH\_REPEAT\_CONTAINING\_RECEPTOR\_NLR\_SIGNALING\_PATHWAYS

OME\_SIGNALING\_BY\_PDGF;REACTOME\_DOWNSTREAM\_SIGNAL\_TRANSDUCTION;REACTOM

3E;REACTOME\_M\_G1\_TRANSITION;REACTOME\_G1\_S\_TRANSITION;REACTOME\_CDT1\_ASSC







Ξ\_PIP3\_ACTIVATES\_AKT\_SIGNALING;REACTOME\_SIGNALING\_BY\_FGFR





SE;REACTOME\_M\_G1\_TRANSITION;REACTOME\_G1\_S\_TRANSITION;REACTOME\_CDT1\_ASSC

ST\_INTERACTIONS\_OF\_HIV\_FACTORS;REACTOME\_THE\_ROLE\_OF\_NEF\_IN\_HIV1\_REPLICAT

EACTOME\_MYD88\_MAL\_CASCADE\_INITIATED\_ON\_PLASMA\_MEMBRANE;REACTOME\_INNATI

.OF\_ACTIVATED\_FGFR;REACTOME\_APOPTOSIS;REACTOME\_IMMUNE\_SYSTEM;REACTOME\_











GRIN\_CELL\_SURFACE\_INTERACTIONS;REACTOME\_REGULATION\_OF\_BETA\_CELL\_DEVELOP





\_FACTORS\_INVOLVED\_IN\_MEGAKARYOCYTE\_DEVELOPMENT\_AND\_PLATELET\_PRODUCTIC  
\_FACTORS\_INVOLVED\_IN\_MEGAKARYOCYTE\_DEVELOPMENT\_AND\_PLATELET\_PRODUCTIC  
\_FACTORS\_INVOLVED\_IN\_MEGAKARYOCYTE\_DEVELOPMENT\_AND\_PLATELET\_PRODUCTIC  
OME\_SIGNALING\_BY\_PDGF;REACTOME\_DOWNSTREAM\_SIGNAL\_TRANSDUCTION;REACTOM



V\_LIFE\_CYCLE;REACTOME\_INTERACTIONS\_OF\_VPR\_WITH\_HOST\_CELLULAR\_PROTEINS;RE

.E;REACTOME\_ABORTIVE\_ELONGATION\_OF\_HIV1\_TRANSCRIPT\_IN\_THE\_ABSENCE\_OF\_TA1

IE\_SIGNALING\_BY\_TGF\_BETA\_RECEPTOR\_COMPLEX  
IE\_SIGNALING\_BY\_TGF\_BETA\_RECEPTOR\_COMPLEX

OST\_INTERACTIONS\_OF\_HIV\_FACTORS;REACTOME\_THE\_ROLE\_OF\_NEF\_IN\_HIV1\_REPLICAT





OL\_II\_PRE\_TRANSCRIPTION\_EVENTS;REACTOME\_RNA\_POL\_III\_TRANSCRIPTION\_INITIATION

REACTOME\_CYTOKINE\_SIGNALING\_IN\_IMMUNE\_SYSTEM;REACTOME\_PLATELET\_ACTIVATION\_SIC



.TRANSDUCTION;REACTOME\_REGULATION\_OF\_INSULIN\_SECRETION\_BY\_GLUCAGON\_LIKE



≡COND\_MESSENGER\_MOLECULES;REACTOME\_SIGNALING\_BY\_PDGF;REACTOME\_DOWNST

3\_I\_MDA5\_MEDIATED\_INDUCION\_OF\_IFN\_ALPHA\_BETA\_PATHWAYS;REACTOME\_HEMOSTA













CTIVATION;REACTOME\_TCR\_SIGNALING;REACTOME\_DOWNSTREAM\_TCR\_SIGNALING;REA

IG\_OF\_CLASS\_I\_MHC;REACTOME\_CLASS\_I\_MHC\_MEDIATED\_ANTIGEN\_PROCESSING\_PRES

GRIN\_CELL\_SURFACE\_INTERACTIONS;REACTOME\_REGULATION\_OF\_BETA\_CELL\_DEVELOP

ERTOIRE;REACTOME\_MYD88\_MAL\_CASCADE\_INITIATED\_ON\_PLASMA\_MEMBRANE;REACTO



ERTOIRE;REACTOME\_MYD88\_MAL\_CASCADE\_INITIATED\_ON\_PLASMA\_MEMBRANE;REACTO







↓\_PROTEASOME\_DEGRADATION;REACTOME\_APC\_CDC20\_MEDIATED\_DEGRADATION\_OF\_N

F6\_MEDIATED\_IRF7\_ACTIVATION;REACTOME\_TRAF6\_MEDIATED\_NFKB\_ACTIVATION;REACT











RD\_RIN;REACTOME\_GASTRIN\_CREB\_SIGNALLING\_PATHWAY\_VIA\_PKC\_AND\_MAPK;REACTO





V\_LIFE\_CYCLE;REACTOME\_INTERACTIONS\_OF\_VPR\_WITH\_HOST\_CELLULAR\_PROTEINS;RE

'HOSPHORYLATES\_TARGETS\_IN\_THE\_CYTOSOL;REACTOME\_GAB1\_SIGNALOSOME;REACTO

CTIVATION;REACTOME\_TCR\_SIGNALING;REACTOME\_DOWNSTREAM\_TCR\_SIGNALING;REA



ERTOIRE;REACTOME\_MYD88\_MAL\_CASCADE\_INITIATED\_ON\_PLASMA\_MEMBRANE;REACTO



ME\_GPCR\_DOWNSTREAM\_SIGNALING;REACTOME\_DOWNSTREAM\_SIGNALING\_OF\_ACTIVAT





REACTOME\_REGULATION\_OF\_GLUCOKINASE\_BY\_GLUCOKINASE\_REGULATORY\_PROTEIN;RE

REACTOME\_MAP\_KINASE\_ACTIVATION\_IN\_TLR\_CASCADE;REACTOME\_MAPK\_TARGETS\_NUCLEA



OME\_IRAK2\_MEDIATED\_ACTIVATION\_OF\_TAK1\_COMPLEX\_UPON\_TLR7\_8\_OR\_9\_STIMULATI



:\_REGULATION\_OF\_WATER\_BALANCE\_BY\_RENAL\_AQUAPORINS;REACTOME\_FACTORS\_INV

V;REACTOME\_MTORC1\_MEDIATED\_SIGNALLING;REACTOME\_ADAPTIVE\_IMMUNE\_SYSTEM;F  
V;REACTOME\_MTORC1\_MEDIATED\_SIGNALLING;REACTOME\_ADAPTIVE\_IMMUNE\_SYSTEM;F

CTOME\_GAB1\_SIGNALOSOME;REACTOME\_TIE2\_SIGNALING;REACTOME\_SIGNALING\_BY\_GF













CTOME\_GAB1\_SIGNALOSOME;REACTOME\_TIE2\_SIGNALING;REACTOME\_SIGNALING\_BY\_GF  
CTOME\_GAB1\_SIGNALOSOME;REACTOME\_TIE2\_SIGNALING;REACTOME\_SIGNALING\_BY\_GF



ME\_SIGNALING\_BY\_FGFR\_MUTANTS;REACTOME\_SHC1\_EVENTS\_IN\_EGFR\_SIGNALING;REA  
TED\_FGFR;REACTOME\_PHOSPHOLIPASE\_C\_MEDIATED\_CASCADE;REACTOME\_EFFECTS\_O





\_C\_MEDIATED\_CASCADE;REACTOME\_HEMOSTASIS;REACTOME\_PLATELET\_ACTIVATION\_SI

















;REACTOME\_FRS2\_MEDIATED\_CASCADE;REACTOME\_DOWNSTREAM\_SIGNALING\_OF\_ACTI'





AL\_REGULATION\_OF\_WHITE\_ADIPOCYTE\_DIFFERENTIATION;REACTOME\_SIGNALING\_BY\_N



JEK2A









IOD1\_2\_SIGNALING\_PATHWAY;REACTOME\_PIP3\_ACTIVATES\_AKT\_SIGNALING;REACTOME\_I

JAL\_TRANSDUCTION\_BY\_L1;REACTOME\_RECYCLING\_PATHWAY\_OF\_L1;REACTOME\_TRAF6\_

THE\_ROLE\_OF\_NEF\_IN\_HIV1\_REPLICATION\_AND\_DISEASE\_PATHOGENESIS;REACTOME\_IMI



FACTOME\_REGULATION\_OF\_GLucOKINASE\_BY\_GLucOKINASE\_REGULATORY\_PROTEIN;RE

OME\_DOWNSTREAM\_SIGNAL\_TRANSDUCTION;REACTOME\_CD28\_CO\_STIMULATION;REACTO







OME\_SIGNALING\_BY\_PDGF;REACTOME\_DOWNSTREAM\_SIGNAL\_TRANSDUCTION;REACTOM







\_MUTANTS;REACTOME\_PI\_METABOLISM;REACTOME\_SIGNALING\_BY\_FGFR\_MUTANTS;REA









ME\_GPCR\_DOWNSTREAM\_SIGNALING;REACTOME\_G\_ALPHA\_I\_SIGNALLING\_EVENTS;REAC

OCIATION\_WITH\_THE\_CDC6\_ORC\_ORIGIN\_COMPLEX;REACTOME\_SYNTHESIS\_OF\_DNA;REA













OCIATION\_WITH\_THE\_CDC6\_ORC\_ORIGIN\_COMPLEX;REACTOME\_SYNTHESIS\_OF\_DNA;REA

ION\_AND\_DISEASE\_PATHOGENESIS;REACTOME\_IMMUNE\_SYSTEM;REACTOME\_ADAPTIVE\_

≡\_IMMUNE\_SYSTEM;REACTOME\_ACTIVATED\_TLR4\_SIGNALLING;REACTOME\_IMMUNE\_SYST

.ACTIVATION\_OF\_BH3\_ONLY\_PROTEINS;REACTOME\_ADAPTIVE\_IMMUNE\_SYSTEM;REACTOM











MENT;REACTOME\_REGULATION\_OF\_GENE\_EXPRESSION\_IN\_BETA\_CELLS;REACTOME\_SIG





)N;REACTOME\_TRAF3\_DEPENDENT\_IRF\_ACTIVATION\_PATHWAY;REACTOME\_RIG\_I\_MDA5\_I  
)N;REACTOME\_TRAF3\_DEPENDENT\_IRF\_ACTIVATION\_PATHWAY;REACTOME\_RIG\_I\_MDA5\_I  
)N;REACTOME\_TRAF3\_DEPENDENT\_IRF\_ACTIVATION\_PATHWAY;REACTOME\_RIG\_I\_MDA5\_I  
)E\_GPCR\_DOWNSTREAM\_SIGNALING;REACTOME\_G\_ALPHA\_I\_SIGNALLING\_EVENTS;REAC

FACTOME\_REGULATION\_OF\_GLucOKINASE\_BY\_GLucOKINASE\_REGULATORY\_PROTEIN;RE

FACTOME\_REGULATION\_OF\_GLucokINASE\_BY\_GLucokINASE\_REGULATORY\_PROTEIN;RE

REACTOME\_FORMATION\_OF\_THE\_HIV1\_EARLY\_ELONGATION\_COMPLEX;REACTOME\_VIR/

ION\_AND\_DISEASE\_PATHOGENESIS;REACTOME\_IMMUNE\_SYSTEM;REACTOME\_ADAPTIVE\_





↓\_FROM\_TYPE\_3\_PROMOTER;REACTOME\_INFLUENZA\_LIFE\_CYCLE;REACTOME\_INFLUENZA/

IGNALING\_AND\_AGGREGATION



\_PEPTIDE1;REACTOME\_REGULATION\_OF\_INSULIN\_SECRETION;REACTOME\_DOWNSTREAM



REACTOME\_SIGNAL\_TRANSDUCTION;REACTOME\_AXON\_GUIDANCE;REACTOME\_DOWNSTREAM

YSIS;REACTOME\_MYD88\_MAL\_CASCADE\_INITIATED\_ON\_PLASMA\_MEMBRANE;REACTOME\_I













CTOME\_GAB1\_SIGNALOSOME;REACTOME\_TIE2\_SIGNALING;REACTOME\_SIGNALING\_BY\_GF

IDENTIFICATION

MENT;REACTOME\_REGULATION\_OF\_GENE\_EXPRESSION\_IN\_BETA\_CELLS;REACTOME\_SIC

ME\_INNATE\_IMMUNE\_SYSTEM;REACTOME\_ACTIVATED\_TLR4\_SIGNALLING;REACTOME\_IMM



ME\_INNATE\_IMMUNE\_SYSTEM;REACTOME\_ACTIVATED\_TLR4\_SIGNALLING;REACTOME\_IMM







JEK2A

OME\_IRAK2\_MEDIATED\_ACTIVATION\_OF\_TAK1\_COMPLEX\_UPON\_TLR7\_8\_OR\_9\_STIMULATI











ME\_SIGNALING\_BY\_FGFR\_MUTANTS;REACTOME\_SHC1\_EVENTS\_IN\_EGFR\_SIGNALING;REA





FACTOME\_REGULATION\_OF\_GLucOKINASE\_BY\_GLucOKINASE\_REGULATORY\_PROTEIN;RE

OME\_REGULATION\_OF\_BETA\_CELL\_DEVELOPMENT;REACTOME\_REGULATION\_OF\_GENE\_E

CTOME\_GAB1\_SIGNALOSOME;REACTOME\_TIE2\_SIGNALING;REACTOME\_SIGNALING\_BY\_GF



ME\_INNATE\_IMMUNE\_SYSTEM;REACTOME\_ACTIVATED\_TLR4\_SIGNALLING;REACTOME\_IMM



TED\_FGFR;REACTOME\_PHOSPHOLIPASE\_C\_MEDIATED\_CASCADE;REACTOME\_EFFECTS\_O





:ACTOME\_IMMUNE\_SYSTEM;REACTOME\_CYTOKINE\_SIGNALING\_IN\_IMMUNE\_SYSTEM

R\_EVENTS\_MEDIATED\_BY\_MAP\_KINASES;REACTOME\_PLATELET\_HOMEOSTASIS;REACTOM



ION;REACTOME\_TRAF6\_MEDIATED\_INDUCION\_OF\_NFKB\_AND\_MAP\_KINASES\_UPON\_TLR7



INVOLVED\_IN\_MEGAKARYOCYTE\_DEVELOPMENT\_AND\_PLATELET\_PRODUCTION;REACTOME\_

REACTOME\_PIP3\_ACTIVATES\_AKT\_SIGNALING;REACTOME\_SIGNALING\_BY\_FGFR;REACTOM  
REACTOME\_PIP3\_ACTIVATES\_AKT\_SIGNALING;REACTOME\_SIGNALING\_BY\_FGFR;REACTOM

'CR;REACTOME\_SIGNALING\_BY\_PDGF;REACTOME\_GPVI\_MEDIATED\_ACTIVATION\_CASCADE













'CR;REACTOME\_SIGNALING\_BY\_PDGF;REACTOME\_GPVI\_MEDIATED\_ACTIVATION\_CASCADE  
'CR;REACTOME\_SIGNALING\_BY\_PDGF;REACTOME\_GPVI\_MEDIATED\_ACTIVATION\_CASCADE



ACTOME\_TIE2\_SIGNALING;REACTOME\_SIGNALING\_BY\_GPCR;REACTOME\_SIGNALING\_BY\_PI  
F\_PIP2\_HYDROLYSIS;REACTOME\_PLATELET\_HOMEOSTASIS;REACTOME\_PLATELET\_CALCII





GNALING\_AND\_AGGREGATION;REACTOME\_SIGNALING\_BY\_FGFR

















VATED\_FGFR;REACTOME\_MAP\_KINASE\_ACTIVATION\_IN\_TLR\_CASCADE;REACTOME\_L1CAM





OTCH;REACTOME\_HEMOSTASIS;REACTOME\_INNATE\_IMMUNE\_SYSTEM;REACTOME\_IMMUN













NUCLEOTIDE\_BINDING\_DOMAIN\_LEUCINE\_RICH\_REPEAT\_CONTAINING\_RECEPTOR\_NLR\_SI

\_MEDIATED\_INDUCION\_OF\_NFKB\_AND\_MAP\_KINASES\_UPON\_TLR7\_8\_OR\_9\_ACTIVATION;F

IMMUNE\_SYSTEM;REACTOME\_ADAPTIVE\_IMMUNE\_SYSTEM;REACTOME\_CYTOKINE\_SIGNALIN



:ACTOME\_IMMUNE\_SYSTEM;REACTOME\_CYTOKINE\_SIGNALING\_IN\_IMMUNE\_SYSTEM

OME\_GPCR\_DOWNSTREAM\_SIGNALING;REACTOME\_G\_BETA\_GAMMA\_SIGNALLING\_THROU







1E\_AXON\_GUIDANCE;REACTOME\_NCAM\_SIGNALING\_FOR\_NEURITE\_OUT\_GROWTH;REACTO







CTOME\_PI3K\_AKT\_ACTIVATION;REACTOME\_TCR\_SIGNALING;REACTOME\_DOWNSTREAM\_T









TOME\_G\_ALPHA\_S\_SIGNALLING\_EVENTS;REACTOME\_G\_ALPHA\_Z\_SIGNALLING\_EVENTS;RE

CTOME\_AUTODEGRADATION\_OF\_THE\_E3\_UBIQUITIN\_LIGASE\_COP1;REACTOME\_METABOLI













CTOME\_AUTODEGRADATION\_OF\_THE\_E3\_UBIQUITIN\_LIGASE\_COP1;REACTOME\_METABOLI

\_IMMUNE\_SYSTEM

EM;REACTOME\_TOLL\_RECEPTOR\_CASCADES;REACTOME\_AMYLOIDS

ME\_PIP3\_ACTIVATES\_AKT\_SIGNALING;REACTOME\_SIGNALING\_BY\_FGFR;REACTOME\_INTRII











SIGNALING\_BY\_GPCR;REACTOME\_INTEGRIN\_ALPHAIIIB\_BETA3\_SIGNALING;REACTOME\_SIGNA





MEDIATED\_INDUCTION\_OF\_IFN\_ALPHA\_BETA\_PATHWAYS;REACTOME\_TRANSCRIPTIONAL\_  
MEDIATED\_INDUCTION\_OF\_IFN\_ALPHA\_BETA\_PATHWAYS;REACTOME\_TRANSCRIPTIONAL\_  
MEDIATED\_INDUCTION\_OF\_IFN\_ALPHA\_BETA\_PATHWAYS;REACTOME\_TRANSCRIPTIONAL\_  
TOME\_G\_ALPHA\_S\_SIGNALLING\_EVENTS;REACTOME\_G\_ALPHA\_Z\_SIGNALLING\_EVENTS;RE

:ACTOME\_IMMUNE\_SYSTEM;REACTOME\_CYTOKINE\_SIGNALING\_IN\_IMMUNE\_SYSTEM

:ACTOME\_IMMUNE\_SYSTEM;REACTOME\_CYTOKINE\_SIGNALING\_IN\_IMMUNE\_SYSTEM

AL\_MESSENGER\_RNA\_SYNTHESIS;REACTOME\_LATE\_PHASE\_OF\_HIV\_LIFE\_CYCLE

\_IMMUNE\_SYSTEM





\\_VIRAL\_RNA\_TRANSCRIPTION\_AND\_REPLICATION;REACTOME\_HIV\_INFECTION;REACTOME



I\_SIGNALING\_OF\_ACTIVATED\_FGFR;REACTOME\_PHOSPHOLIPASE\_C\_MEDIATED\_CASCADE



\_SIGNALING\_OF\_ACTIVATED\_FGFR;REACTOME\_PHOSPHOLIPASE\_C\_MEDIATED\_CASCADE;

NNATE\_IMMUNE\_SYSTEM;REACTOME\_ACTIVATED\_TLR4\_SIGNALLING;REACTOME\_IMMUNE













'CR;REACTOME\_SIGNALING\_BY\_PDGF;REACTOME\_GPVI\_MEDIATED\_ACTIVATION\_CASCADE

SIGNALING\_BY\_GPCR;REACTOME\_INTEGRIN\_ALPHAIIIB\_BETA3\_SIGNALING;REACTOME\_SIGNA

1UNE\_SYSTEM;REACTOME\_TOLL\_RECEPTOR\_CASCADES;REACTOME\_NOD1\_2\_SIGNALING\_



1UNE\_SYSTEM;REACTOME\_TOLL\_RECEPTOR\_CASCADES;REACTOME\_NOD1\_2\_SIGNALING\_









ION;REACTOME\_TRAF6\_MEDIATED\_INDUCION\_OF\_NFKB\_AND\_MAP\_KINASES\_UPON\_TLR7











ACTOME\_TIE2\_SIGNALING;REACTOME\_SIGNALING\_BY\_GPCR;REACTOME\_SIGNALING\_BY\_PI





:ACTOME\_IMMUNE\_SYSTEM;REACTOME\_CYTOKINE\_SIGNALING\_IN\_IMMUNE\_SYSTEM

XPRESSION\_IN\_BETA\_CELLS;REACTOME\_SIGNALING\_BY\_GPCR;REACTOME\_SIGNALING\_B'

'CR;REACTOME\_SIGNALING\_BY\_PDGF;REACTOME\_GPVI\_MEDIATED\_ACTIVATION\_CASCADE



1UNE\_SYSTEM;REACTOME\_TOLL\_RECEPTOR\_CASCADES;REACTOME\_NOD1\_2\_SIGNALING\_



F\_PIP2\_HYDROLYSIS;REACTOME\_PLATELET\_HOMEOSTASIS;REACTOME\_PLATELET\_CALCII





IE\_PLATELET\_SE







HEMOSTASIS;REACTOME\_SIG

IE\_PI3K\_CA  
IE\_PI3K\_CA

Ξ;REACT













Ξ;REACT  
Ξ;REACT



DGF;REAC  
JM\_HOMEOSTASIS;R























1\_INTERACTIO





IE\_SYSTEM













GNALING\_PATHW

REACTOME\_NFKB\_AND\_MAP\_

G\_IN\_IMMUNE\_S





GH\_PI3KGAMMA;REAC







OME\_ACTIVATION\_







CR\_SIGNA









FACTOME\_ACTIVATION\_OF\_

ISM\_OF\_MRNA;REACTOME\_METABO













ISM\_OF\_MRNA;REACTOME\_METABO

NSIC\_PATHWAY



\_ADRENALINE\_NORADR







.LING\_BY\_PDG





REGULATION\_OF\_WHITE  
REGULATION\_OF\_WHITE  
REGULATION\_OF\_WHITE  
:ACTOME\_DOWNSTREAM\_SIG











:\_HIV\_LI



;REACTOME\_MITOTIC\_G2\_G



;REACTOME\_ROLE\_OF\_SE

\_SYSTEM;RE













Ξ;REACT

.LING\_BY\_PDG



























DGF;REAC









Ξ;REACT







JM\_HOMEOSTASIS;R
