# Supplementary material for: Genomic alterations caused by HPV integration in a cohort of Chinese endocervical adenocarcinomas
Source: PubMed Central journal article supplement (PMC8636260; doi:10.1038/s41417-020-00283-4), 2021-01-04
Supplement: 41417_2020_283_MOESM9_ESM.pdf [file 41417_2020_283_MOESM9_ESM.pdf]

**Supplementary Table 8**

**Detail of somatic INDELS detected in each case by whole exome sequencing.**

| Patient | CHROM | POS | ID        | REF     | ALT     | QUAL | FILTER | GeneName  | Func       | Gene     |
|---------|-------|-----|-----------|---------|---------|------|--------|-----------|------------|----------|
| ACa01   | 2     | ### | .         | AC      | A       | .    | PASS   | TFCP2L1   | intronic   | NM_01455 |
| ACa01   | 2     | ### | .         | G       | GT      | .    | PASS   | CTLA4     | exonic     | NM_00521 |
| ACa01   | 6     | ### | rs6078884 | TTGGAG  | T       | .    | PASS   | .         | intergenic | NR_00366 |
| ACa01   | 7     | ### | .         | GTTT    | G       | .    | PASS   | BET1      | exonic     | NM_00586 |
| ACa01   | 12    | ### | rs3773783 | T       | TC      | .    | PASS   | SLC8B1    | intronic   | NM_02495 |
| ACa01   | 15    | ### | .         | AT      | A       | .    | PASS   | VPS13C    | exonic     | NM_00101 |
| ACa01   | 17    | ### | .         | CAGA    | C       | .    | PASS   | OR1G1     | exonic     | NM_00355 |
| ACa01   | 19    | ### | .         | T       | TC      | .    | PASS   | IFNL2     | intronic   | NM_17213 |
| ACa01   | 21    | ### | .         | C       | CAG     | .    | PASS   | DNMT3L    | exonic     | NM_01336 |
| ACa01   | X     | ### | rs7821786 | T       | TAGAC   | .    | PASS   | HSD17B10  | intronic   | NM_00103 |
| ACa02   | 5     | ### | .         | ACACAGC | A       | .    | PASS   | ANKRD33   | exonic     | NM_00116 |
| ACa02   | 13    | ### | rs9190283 | G       | GT      | .    | PASS   | FLT1      | intronic   | NM_00115 |
| ACa02   | 14    | ### | .         | T       | TTGGGC  | .    | PASS   | ACTN1     | UTR5       | NM_00110 |
| ACa02   | 19    | ### | rs7640343 | GTGTGTC | G       | .    | PASS   | ANKLE1    | exonic     | NM_00127 |
| ACa02   | 22    | ### | rs5844903 | TC      | T       | .    | PASS   | SF3A1     | intronic   | NM_00587 |
| ACa03   | 3     | ### | .         | GGGGATG | G       | .    | PASS   | RBM6      | exonic     | NM_00577 |
| ACa04   | 2     | ### | .         | CG      | C       | .    | PASS   | LTBP1     | exonic     | NM_00062 |
| ACa04   | 3     | ### | .         | CGT     | C       | .    | PASS   | .         | intergenic | NM_00578 |
| ACa04   | 16    | ### | .         | GC      | G       | .    | PASS   | SCNN1G    | intronic   | NM_00103 |
| ACa06   | 16    | ### | .         | CCTCTTT | C       | .    | PASS   | .         | ncRNA_int  | NR_12616 |
| ACa06   | 17    | ### | .         | C       | CTCTCTC | .    | PASS   | ALOX15P1  | ncRNA_int  | NR_04598 |
| ACa06   | 17    | ### | .         | CTG     | C       | .    | PASS   | KIF19     | intronic   | NM_15320 |
| ACa07   | 1     | ### | rs7760984 | AC      | A       | .    | PASS   | NOC2L     | intronic   | NM_01565 |
| ACa07   | 1     | ### | rs9376078 | TC      | T       | .    | PASS   | LINC01342 | ncRNA_ex   | NR_03886 |
| ACa07   | 1     | ### | .         | AC      | A       | .    | PASS   | CPSF3L    | intronic   | NM_00125 |
| ACa07   | 1     | ### | rs7790390 | T       | TG      | .    | PASS   | ANKRD65   | splicing   | NM_00114 |
| ACa07   | 1     | ### | .         | AC      | A       | .    | PASS   | ATAD3C    | intronic   | NM_00103 |
| ACa07   | 1     | ### | .         | CG      | C       | .    | PASS   | TNFRSF10  | intronic   | NM_00106 |
| ACa07   | 1     | ### | .         | TG      | T       | .    | PASS   | UBR4      | exonic     | NM_02076 |
| ACa07   | 1     | ### | .         | CA      | C       | .    | PASS   | ARID1A    | exonic     | NM_00601 |
| ACa07   | 1     | ### | .         | A       | AC      | .    | PASS   | MACF1     | intronic   | NM_01209 |
| ACa07   | 1     | ### | .         | C       | CT      | .    | PASS   | MACF1     | intronic   | NM_01209 |
| ACa07   | 1     | ### | rs7712392 | GA      | G       | .    | PASS   | HIVEP3    | intronic   | NM_00112 |
| ACa07   | 1     | ### | rs7686883 | T       | TG      | .    | PASS   | TM2D1     | intronic   | NM_03202 |
| ACa07   | 1     | ### | .         | CT      | C       | .    | PASS   | COL24A1   | exonic     | NM_15289 |
| ACa07   | 1     | ### | rs7700977 | GT      | G       | .    | PASS   | SARS      | intronic   | NM_00651 |
| ACa07   | 1     | ### | .         | AG      | A       | .    | PASS   | RHOC      | intronic   | NM_00104 |
| ACa07   | 1     | ### | .         | TG      | T       | .    | PASS   | APH1A     | intronic   | NM_00107 |
| ACa07   | 1     | ### | .         | GT      | G       | .    | PASS   | UBE2Q1    | exonic     | NM_01758 |
| ACa07   | 1     | ### | .         | TA      | T       | .    | PASS   | CLK2      | exonic     | NM_00129 |
| ACa07   | 1     | ### | .         | GA      | G       | .    | PASS   | GON4L     | intronic   | NM_00128 |
| ACa07   | 1     | ### | .         | CAG     | C       | .    | PASS   | BCAN      | intronic   | NM_02194 |
| ACa07   | 1     | ### | .         | TC      | T       | .    | PASS   | PAPPA2    | intronic   | NM_02031 |
| ACa07   | 1     | ### | rs7584166 | G       | GA      | .    | PASS   | AXDND1    | exonic     | NM_14469 |
| ACa07   | 1     | ### | rs7537986 | GA      | G       | .    | PASS   | DHX9      | UTR3       | NM_00135 |
| ACa07   | 1     | ### | rs5395449 | AT      | A       | .    | PASS   | PTPRC     | intronic   | NM_00283 |
| ACa07   | 1     | ### | .         | AC      | A       | .    | PASS   | PLEKHA6   | exonic     | NM_01493 |
| ACa07   | 1     | ### | rs7594247 | TA      | T       | .    | PASS   | LIN9      | intronic   | NM_00127 |
| ACa07   | 1     | ### | rs7703770 | TA      | T       | .    | PASS   | CDC42BP1  | intronic   | NM_00360 |
| ACa07   | 1     | ### | .         | CG      | C       | .    | PASS   | TSNAX-DI  | ncRNA_ex   | NR_02839 |
| ACa07   | 2     | ### | rs7968975 | CTG     | C       | .    | PASS   | .         | intergenic | NR_11025 |

|       |       |           |        |    |   |      |          |            |          |
|-------|-------|-----------|--------|----|---|------|----------|------------|----------|
| ACa07 | 2 ### | .         | C      | CA | . | PASS | ROCK2    | exonic     | NM_00485 |
| ACa07 | 2 ### | rs7808912 | AT     | A  | . | PASS | FAM228A  | intronic   | NM_00104 |
| ACa07 | 2 ### | .         | TA     | T  | . | PASS | BRE      | intronic   | NM_00126 |
| ACa07 | 2 ### | rs1997131 | CA     | C  | . | PASS | .        | intergenic | NM_00111 |
| ACa07 | 2 ### | .         | GA     | G  | . | PASS | PIGF     | intronic   | NM_00264 |
| ACa07 | 2 ### | rs7703599 | A      | AT | . | PASS | MTIF2    | exonic     | NM_00100 |
| ACa07 | 2 ### | rs7789371 | G      | GC | . | PASS | LOXL3    | exonic     | NM_03260 |
| ACa07 | 2 ### | .         | G      | GT | . | PASS | MRPL35   | intronic   | NM_01662 |
| ACa07 | 2 ### | .         | TA     | T  | . | PASS | AFF3     | intronic   | NM_00102 |
| ACa07 | 2 ### | .         | CG     | C  | . | PASS | TFCP2L1  | intronic   | NM_01455 |
| ACa07 | 2 ### | rs7647197 | TA     | T  | . | PASS | ACVR2A   | exonic     | NM_00127 |
| ACa07 | 2 ### | .         | AG     | A  | . | PASS | CSRNP3   | exonic     | NM_00117 |
| ACa07 | 2 ### | .         | A      | AT | . | PASS | LOC10272 | ncRNA_int  | NR_11059 |
| ACa07 | 2 ### | rs7456483 | T      | TG | . | PASS | XIRP2    | exonic     | NM_00119 |
| ACa07 | 2 ### | .         | CT     | C  | . | PASS | ATF2     | exonic     | NM_00125 |
| ACa07 | 2 ### | .         | AT     | A  | . | PASS | PDE11A   | intronic   | NM_00107 |
| ACa07 | 2 ### | rs7470964 | CT     | C  | . | PASS | MIR548N  | ncRNA_int  | NR_03166 |
| ACa07 | 2 ### | .         | AT     | A  | . | PASS | TTN      | exonic     | NM_00125 |
| ACa07 | 2 ### | .         | A      | AT | . | PASS | STAT1    | exonic     | NM_00731 |
| ACa07 | 2 ### | .         | CA     | C  | . | PASS | BOLL     | intronic   | NM_00128 |
| ACa07 | 2 ### | .         | T      | TA | . | PASS | CDK15    | intronic   | NM_00126 |
| ACa07 | 2 ### | .         | AC     | A  | . | PASS | ADAM23   | exonic     | NM_00381 |
| ACa07 | 2 ### | .         | AG     | A  | . | PASS | FASTKD2  | exonic     | NM_00113 |
| ACa07 | 2 ### | .         | GA     | G  | . | PASS | METTTL21 | intronic   | NM_00112 |
| ACa07 | 2 ### | .         | TA     | T  | . | PASS | RESP18   | splicing   | NM_00100 |
| ACa07 | 2 ### | .         | TG     | T  | . | PASS | SPHKAP   | exonic     | NM_00114 |
| ACa07 | 2 ### | rs5440185 | A      | AC | . | PASS | DNAJB3   | exonic     | NM_00100 |
| ACa07 | 2 ### | .         | CT     | C  | . | PASS | FARP2    | intronic   | NM_01480 |
| ACa07 | 3 ### | .         | AT     | A  | . | PASS | CNTN6    | exonic     | NM_00128 |
| ACa07 | 3 ### | rs9042896 | C      | CT | . | PASS | FGD5     | UTR3       | NM_15253 |
| ACa07 | 3 ### | rs7608755 | TA     | T  | . | PASS | NGLY1    | intronic   | NM_00114 |
| ACa07 | 3 ### | .         | GAA    | G  | . | PASS | SACM1L   | intronic   | NM_01401 |
| ACa07 | 3 ### | .         | TGAG   | T  | . | PASS | PTPN23   | exonic     | NM_01546 |
| ACa07 | 3 ### | rs7647092 | A      | AG | . | PASS | RBM6     | exonic     | NM_00577 |
| ACa07 | 3 ### | .         | CA     | C  | . | PASS | IQCF5-AS | ncRNA_ex   | NR_10998 |
| ACa07 | 3 ### | .         | CG     | C  | . | PASS | PRKCD    | exonic     | NM_00625 |
| ACa07 | 3 ### | .         | CT     | C  | . | PASS | CACNA1D  | intronic   | NM_00072 |
| ACa07 | 3 ### | .         | AAG    | A  | . | PASS | C3orf17  | intronic   | NM_01541 |
| ACa07 | 3 ### | .         | T      | TG | . | PASS | ACAD9    | intronic   | NM_01404 |
| ACa07 | 3 ### | rs7755820 | GA     | G  | . | PASS | FAIM     | exonic     | NM_00103 |
| ACa07 | 3 ### | .         | T      | TC | . | PASS | ANKUB1   | intronic   | NM_00114 |
| ACa07 | 3 ### | .         | CTTCT  | C  | . | PASS | MBNL1    | intronic   | NM_02103 |
| ACa07 | 3 ### | .         | A      | AT | . | PASS | NLGN1    | intronic   | NM_01493 |
| ACa07 | 3 ### | .         | TG     | T  | . | PASS | CHRD     | intronic   | NM_00374 |
| ACa07 | 4 ### | .         | G      | GC | . | PASS | LOC10013 | ncRNA_int  | NR_02456 |
| ACa07 | 4 ### | rs7704742 | TTAAC  | T  | . | PASS | UVSSA    | exonic     | NM_02089 |
| ACa07 | 4 ### | rs7480610 | GAGA   | G  | . | PASS | .        | intergenic | NM_05304 |
| ACa07 | 4 ### | rs7646973 | AT     | A  | . | PASS | PGM2     | intronic   | NM_01829 |
| ACa07 | 4 ### | rs9281864 | GA     | G  | . | PASS | LIMCH1   | intronic   | NM_00111 |
| ACa07 | 4 ### | .         | AAGG   | A  | . | PASS | SCFD2    | exonic     | NM_15254 |
| ACa07 | 4 ### | rs7525252 | AAAAAG | A  | . | PASS | PDCL2    | intronic   | NM_15240 |
| ACa07 | 4 ### | .         | TC     | T  | . | PASS | PRDM8    | exonic     | NM_00109 |
| ACa07 | 4 ### | .         | C      | CT | . | PASS | SMARCAE  | intronic   | NM_00112 |
| ACa07 | 4 ### | .         | CG     | C  | . | PASS | EGF      | intronic   | NM_00117 |

|       |       |           |      |      |   |      |          |            |          |
|-------|-------|-----------|------|------|---|------|----------|------------|----------|
| ACa07 | 4 ### | .         | C    | CA   | . | PASS | CAMK2D   | intronic   | NM_00122 |
| ACa07 | 4 ### | rs7641185 | C    | CT   | . | PASS | ARSJ     | exonic     | NM_02459 |
| ACa07 | 4 ### | rs7639462 | TCTC | T    | . | PASS | FAT4     | exonic     | NM_00129 |
| ACa07 | 4 ### | .         | A    | AT   | . | PASS | NEIL3    | exonic     | NM_01824 |
| ACa07 | 4 ### | .         | C    | CA   | . | PASS | FRG2     | intronic   | NM_00100 |
| ACa07 | 5 ### | .         | AG   | A    | . | PASS | SDHAP3   | ncRNA_int  | NR_00326 |
| ACa07 | 5 ### | rs7466549 | AC   | A    | . | PASS | TRIO     | exonic     | NM_00711 |
| ACa07 | 5 ### | rs7717298 | C    | CA   | . | PASS | ANKH     | UTR3       | NM_05402 |
| ACa07 | 5 ### | .         | GA   | G    | . | PASS | ADAMTS1  | intronic   | NM_03095 |
| ACa07 | 5 ### | .         | GA   | G    | . | PASS | C5orf42  | intronic   | NM_02307 |
| ACa07 | 5 ### | rs7625018 | CT   | C    | . | PASS | OSMR     | intronic   | NM_00399 |
| ACa07 | 5 ### | rs7658478 | T    | TG   | . | PASS | GFM2     | intronic   | NM_00128 |
| ACa07 | 5 ### | .         | G    | GA   | . | PASS | AP3B1    | intronic   | NM_00127 |
| ACa07 | 5 ### | .         | ACT  | A    | . | PASS | SRA1     | intronic   | NM_00103 |
| ACa07 | 5 ### | rs7778584 | GT   | G    | . | PASS | PCDHGA3  | exonic     | NM_01891 |
| ACa07 | 5 ### | rs7693384 | G    | GC   | . | PASS | LARP1    | exonic     | NM_01531 |
| ACa07 | 5 ### | .         | AG   | A    | . | PASS | SLIT3    | exonic     | NM_00127 |
| ACa07 | 5 ### | rs7768326 | CG   | C    | . | PASS | SLIT3    | intronic   | NM_00127 |
| ACa07 | 6 ### | rs3743843 | CT   | C    | . | PASS | GPX5     | intronic   | NM_00150 |
| ACa07 | 6 ### | .         | TG   | T    | . | PASS | MICB     | intronic   | NM_00128 |
| ACa07 | 6 ### | rs7666007 | CT   | C    | . | PASS | SKIV2L   | intronic   | NM_00692 |
| ACa07 | 6 ### | rs7805014 | TC   | T    | . | PASS | AGER     | exonic     | NM_00120 |
| ACa07 | 6 ### | rs7489955 | CG   | C    | . | PASS | PBX2     | intronic   | NM_00258 |
| ACa07 | 6 ### | rs7612855 | G    | GA   | . | PASS | HLA-DMB  | intronic   | NM_00211 |
| ACa07 | 6 ### | rs7600208 | AC   | A    | . | PASS | C6orf89  | exonic     | NM_00128 |
| ACa07 | 6 ### | .         | GC   | G    | . | PASS | FOXP4    | exonic     | NM_00101 |
| ACa07 | 6 ### | .         | GA   | G    | . | PASS | FILIP1   | intronic   | NM_00128 |
| ACa07 | 6 ### | .         | GA   | G    | . | PASS | PNISR    | UTR3       | NM_01549 |
| ACa07 | 6 ### | rs7792033 | C    | CA   | . | PASS | SIM1     | intronic   | NM_00506 |
| ACa07 | 6 ### | rs7668254 | CA   | C    | . | PASS | GRIK2    | exonic     | NM_00116 |
| ACa07 | 6 ### | .         | TC   | T    | . | PASS | BEND3    | exonic     | NM_00108 |
| ACa07 | 6 ### | .         | A    | AG   | . | PASS | SLC16A10 | intronic   | NM_01859 |
| ACa07 | 6 ### | .         | G    | GT   | . | PASS | TRAF3IP2 | exonic     | NM_00116 |
| ACa07 | 6 ### | rs1490463 | ATG  | A    | . | PASS | LAMA4    | intronic   | NM_00110 |
| ACa07 | 6 ### | .         | AT   | A    | . | PASS | TBC1D32  | exonic     | NM_15273 |
| ACa07 | 6 ### | rs7570813 | CT   | C    | . | PASS | HBS1L    | exonic     | NM_00114 |
| ACa07 | 6 ### | rs7468588 | C    | CA   | . | PASS | PHACTR2  | exonic     | NM_00110 |
| ACa07 | 6 ### | .         | TAG  | T    | . | PASS | PNLDC1   | intronic   | NM_00127 |
| ACa07 | 6 ### | .         | A    | AT   | . | PASS | IGF2R    | intronic   | NM_00087 |
| ACa07 | 7 ### | .         | T    | TGCC | . | PASS | .        | intergenic | NONE,NR_ |
| ACa07 | 7 ### | rs1443745 | T    | TG   | . | PASS | .        | intergenic | NR_00128 |
| ACa07 | 7 ### | .         | TC   | T    | . | PASS | RADIL    | exonic     | NM_01805 |
| ACa07 | 7 ### | rs7542333 | C    | CG   | . | PASS | TNRC18   | exonic     | NM_00108 |
| ACa07 | 7 ### | rs3701666 | GA   | G    | . | PASS | MEOX2    | splicing   | NM_00592 |
| ACa07 | 7 ### | .         | A    | AG   | . | PASS | .        | intergenic | NR_12050 |
| ACa07 | 7 ### | rs7470634 | GA   | G    | . | PASS | NOD1     | intronic   | NM_00609 |
| ACa07 | 7 ### | .         | AC   | A    | . | PASS | NOD1     | exonic     | NM_00609 |
| ACa07 | 7 ### | .         | T    | TC   | . | PASS | LANCL2   | exonic     | NM_01869 |
| ACa07 | 7 ### | rs7819467 | TA   | T    | . | PASS | ZNF716   | exonic     | NM_00115 |
| ACa07 | 7 ### | .         | C    | CA   | . | PASS | BCL7B    | intronic   | NM_00119 |
| ACa07 | 7 ### | .         | TG   | T    | . | PASS | ELN      | intronic   | NM_00050 |
| ACa07 | 7 ### | .         | GA   | G    | . | PASS | ZNF3     | intronic   | NM_00127 |
| ACa07 | 7 ### | .         | TG   | T    | . | PASS | NYAP1    | exonic     | NM_17356 |
| ACa07 | 7 ### | rs5592025 | CG   | C    | . | PASS | EPHB4    | intronic   | NM_00444 |

|       |        |           |         |      |   |      |           |            |          |
|-------|--------|-----------|---------|------|---|------|-----------|------------|----------|
| ACa07 | 7 ###  | .         | GCCAGCC | G    | . | PASS | CUX1      | exonic     | NM_00120 |
| ACa07 | 7 ###  | rs7594121 | A       | AGAG | . | PASS | LMOD2     | exonic     | NM_20716 |
| ACa07 | 7 ###  | rs7708715 | TA      | T    | . | PASS | AKR1B10   | intronic   | NM_02029 |
| ACa07 | 7 ###  | .         | G       | GC   | . | PASS | ATG9B     | exonic     | NM_17368 |
| ACa07 | 7 ###  | rs7618495 | CT      | C    | . | PASS | DPP6      | intronic   | NM_00103 |
| ACa07 | 8 ###  | .         | A       | AAAC | . | PASS | MSR1      | intronic   | NM_13871 |
| ACa07 | 8 ###  | rs7790763 | GA      | G    | . | PASS | PSD3      | intronic   | NM_01531 |
| ACa07 | 8 ###  | .         | G       | GC   | . | PASS | .         | intergenic | NM_13927 |
| ACa07 | 8 ###  | rs1126292 | CG      | C    | . | PASS | .         | intergenic | NM_00112 |
| ACa07 | 8 ###  | rs3832550 | C       | CT   | . | PASS | NRG1      | intronic   | NM_00115 |
| ACa07 | 8 ###  | .         | CA      | C    | . | PASS | RNF5P1    | ncRNA_ex   | NR_00312 |
| ACa07 | 8 ###  | .         | AT      | A    | . | PASS | LYN       | intronic   | NM_00111 |
| ACa07 | 8 ###  | rs7782900 | CT      | C    | . | PASS | HEY1      | UTR5       | NM_00128 |
| ACa07 | 8 ###  | rs7759500 | TA      | T    | . | PASS | ESRP1     | exonic     | NM_00103 |
| ACa07 | 8 ###  | .         | CT      | C    | . | PASS | RIMS2     | intronic   | NM_00110 |
| ACa07 | 8 ###  | rs1462533 | TAC     | T    | . | PASS | KCNQ3     | intronic   | NM_00120 |
| ACa07 | 8 ###  | .         | T       | TC   | . | PASS | BAI1      | intronic   | NM_00170 |
| ACa07 | 8 ###  | rs7562540 | A       | AC   | . | PASS | CYC1      | exonic     | NM_00191 |
| ACa07 | 9 ###  | rs7648900 | GA      | G    | . | PASS | MOB3B     | intronic   | NM_02476 |
| ACa07 | 9 ###  | rs7766165 | CA      | C    | . | PASS | DNAJB5    | UTR3       | NM_00113 |
| ACa07 | 9 ###  | .         | CG      | C    | . | PASS | TLN1      | exonic     | NM_00628 |
| ACa07 | 9 ###  | rs5303481 | AT      | A    | . | PASS | .         | intergenic | NM_00120 |
| ACa07 | 9 ###  | .         | G       | GA   | . | PASS | PHF2      | exonic     | NM_00539 |
| ACa07 | 9 ###  | .         | TG      | T    | . | PASS | PTCH1     | exonic     | NM_00026 |
| ACa07 | 9 ###  | .         | CT      | C    | . | PASS | PTCH1     | UTR5       | NM_00108 |
| ACa07 | 9 ###  | rs7606317 | C       | CA   | . | PASS | KIAA0368  | intronic   | NM_00108 |
| ACa07 | 9 ###  | rs7792498 | AT      | A    | . | PASS | OR1L3     | exonic     | NM_00100 |
| ACa07 | 9 ###  | rs1028985 | CCTT    | C    | . | PASS | STRBP     | exonic     | NM_00117 |
| ACa07 | 9 ###  | rs7703285 | CT      | C    | . | PASS | RABEPK    | intronic   | NM_00117 |
| ACa07 | 9 ###  | rs3675892 | AC      | A    | . | PASS | C9orf50,N | intronic   | NM_00128 |
| ACa07 | 9 ###  | .         | TG      | T    | . | PASS | PPAPDC3   | intronic   | NM_03272 |
| ACa07 | 9 ###  | .         | TG      | T    | . | PASS | PMPCA     | exonic     | NM_00128 |
| ACa07 | 9 ###  | .         | G       | GC   | . | PASS | LCN8      | intronic   | NM_17846 |
| ACa07 | 9 ###  | rs7517698 | A       | AC   | . | PASS | CCDC183   | intronic   | NM_00103 |
| ACa07 | 9 ###  | .         | AC      | A    | . | PASS | C9orf142  | exonic     | NM_18324 |
| ACa07 | 10 ### | .         | A       | AG   | . | PASS | SFMBT2    | exonic     | NM_00101 |
| ACa07 | 10 ### | rs7625775 | AT      | A    | . | PASS | GAD2      | intronic   | NM_00081 |
| ACa07 | 10 ### | .         | CA      | C    | . | PASS | C10orf126 | exonic     | NM_00127 |
| ACa07 | 10 ### | .         | TA      | T    | . | PASS | FAM35DP   | ncRNA_ex   | NR_02763 |
| ACa07 | 10 ### | rs7582351 | T       | TA   | . | PASS | JMJD1C    | splicing   | NM_00128 |
| ACa07 | 10 ### | .         | G       | GT   | . | PASS | DDX21     | intronic   | NM_00125 |
| ACa07 | 10 ### | rs7542104 | C       | CG   | . | PASS | ADAMTS1   | exonic     | NM_08072 |
| ACa07 | 10 ### | rs7696631 | T       | TC   | . | PASS | ZSWIM8    | exonic     | NM_00124 |
| ACa07 | 10 ### | .         | CT      | C    | . | PASS | ZMIZ1     | intronic   | NM_02033 |
| ACa07 | 10 ### | rs7488695 | GACAA   | G    | . | PASS | ANXA11    | intronic   | NM_00115 |
| ACa07 | 10 ### | rs7664186 | GGAA    | G    | . | PASS | AGAP11    | exonic     | NM_13344 |
| ACa07 | 10 ### | rs7585686 | AT      | A    | . | PASS | PDE6C     | intronic   | NM_00620 |
| ACa07 | 10 ### | .         | CA      | C    | . | PASS | INA       | intronic   | NM_03272 |
| ACa07 | 10 ### | rs5534658 | G       | GC   | . | PASS | TACC2     | intronic   | NM_00129 |
| ACa07 | 10 ### | .         | GT      | G    | . | PASS | BNIP3     | intronic   | NM_00405 |
| ACa07 | 11 ### | .         | T       | TG   | . | PASS | IFITM3    | intronic   | NM_02103 |
| ACa07 | 11 ### | .         | TG      | T    | . | PASS | B4GALNT4  | exonic     | NM_17853 |
| ACa07 | 11 ### | rs7518721 | AC      | A    | . | PASS | BRSK2     | exonic     | NM_00125 |
| ACa07 | 11 ### | rs9766384 | CA      | C    | . | PASS | OR51E2    | intronic   | NM_03077 |

|       |    |     |           |       |     |   |      |          |            |          |
|-------|----|-----|-----------|-------|-----|---|------|----------|------------|----------|
| ACa07 | 11 | ### | .         | GC    | G   | . | PASS | RBMXL2   | exonic     | NM_01446 |
| ACa07 | 11 | ### | .         | CCCTT | C   | . | PASS | ST5      | intronic   | NM_00541 |
| ACa07 | 11 | ### | rs7632273 | T     | TTG | . | PASS | PRMT3    | intronic   | NM_00114 |
| ACa07 | 11 | ### | rs7778008 | C     | CA  | . | PASS | MUC15,AM | intronic   | NM_00113 |
| ACa07 | 11 | ### | rs1049395 | CA    | C   | . | PASS | HSD17B12 | intronic   | NM_01614 |
| ACa07 | 11 | ### | .         | AG    | A   | . | PASS | MAPK8IP1 | exonic     | NM_00545 |
| ACa07 | 11 | ### | .         | AG    | A   | . | PASS | EML3     | exonic     | NM_00130 |
| ACa07 | 11 | ### | .         | GA    | G   | . | PASS | RBM4B,RE | intronic   | NM_00119 |
| ACa07 | 11 | ### | rs7588677 | GC    | G   | . | PASS | ADRBK1   | intronic   | NM_00161 |
| ACa07 | 11 | ### | rs8987047 | GA    | G   | . | PASS | .        | upstream   | NM_00101 |
| ACa07 | 11 | ### | rs7647351 | AC    | A   | . | PASS | USP35    | exonic     | NM_02079 |
| ACa07 | 11 | ### | .         | AC    | A   | . | PASS | DLG2     | intronic   | NM_00114 |
| ACa07 | 11 | ### | .         | AT    | A   | . | PASS | FAT3     | exonic     | NM_00100 |
| ACa07 | 11 | ### | rs5739889 | AT    | A   | . | PASS | CEP295   | intronic   | NM_03339 |
| ACa07 | 11 | ### | rs7766671 | AAAGT | A   | . | PASS | JAM3     | exonic     | NM_00120 |
| ACa07 | 12 | ### | rs7749641 | CT    | C   | . | PASS | KDM5A    | exonic     | NM_00104 |
| ACa07 | 12 | ### | rs7666743 | C     | CT  | . | PASS | GALNT8   | intronic   | NM_01741 |
| ACa07 | 12 | ### | .         | CT    | C   | . | PASS | ING4     | intronic   | NM_00112 |
| ACa07 | 12 | ### | .         | TC    | T   | . | PASS | PTPN6    | intronic   | NM_00283 |
| ACa07 | 12 | ### | .         | GA    | G   | . | PASS | SLC2A14  | intronic   | NM_00128 |
| ACa07 | 12 | ### | .         | A     | AAG | . | PASS | CLECL1   | exonic     | NM_00125 |
| ACa07 | 12 | ### | rs7566997 | GTTC  | G   | . | PASS | LOH12CR  | UTR5       | NM_05816 |
| ACa07 | 12 | ### | rs7649880 | AT    | A   | . | PASS | PPFIBP1  | intronic   | NM_00119 |
| ACa07 | 12 | ### | .         | TCTC  | T   | . | PASS | PPFIBP1  | intronic   | NM_00119 |
| ACa07 | 12 | ### | .         | TG    | T   | . | PASS | MUC19    | exonic     | NM_17360 |
| ACa07 | 12 | ### | .         | T     | TC  | . | PASS | .        | intergenic | NM_00471 |
| ACa07 | 12 | ### | rs7636694 | CA    | C   | . | PASS | KMT2D    | intronic   | NM_00348 |
| ACa07 | 12 | ### | .         | TC    | T   | . | PASS | ASIC1    | intronic   | NM_00109 |
| ACa07 | 12 | ### | .         | GTA   | G   | . | PASS | SLC11A2  | intronic   | NM_00061 |
| ACa07 | 12 | ### | .         | GC    | G   | . | PASS | SCN8A    | exonic     | NM_00117 |
| ACa07 | 12 | ### | .         | TG    | T   | . | PASS | EIF4B    | intronic   | NM_00130 |
| ACa07 | 12 | ### | rs5532896 | AT    | A   | . | PASS | HOXC5    | UTR5       | NM_01895 |
| ACa07 | 12 | ### | .         | CA    | C   | . | PASS | TIMELESS | exonic     | NM_00392 |
| ACa07 | 12 | ### | rs7706124 | CT    | C   | . | PASS | MYO1A    | exonic     | NM_00125 |
| ACa07 | 12 | ### | rs5359317 | T     | TG  | . | PASS | LRP1     | UTR5       | NM_00233 |
| ACa07 | 12 | ### | rs7763171 | TG    | T   | . | PASS | MBD6     | exonic     | NM_05289 |
| ACa07 | 12 | ### | rs1999629 | GT    | G   | . | PASS | HCFC2    | intronic   | NM_01332 |
| ACa07 | 12 | ### | .         | TAAAG | T   | . | PASS | NFYB     | intronic   | NM_00616 |
| ACa07 | 12 | ### | .         | C     | CT  | . | PASS | DNAH10   | exonic     | NM_20743 |
| ACa07 | 13 | ### | rs7643750 | GC    | G   | . | PASS | WASF3    | exonic     | NM_00129 |
| ACa07 | 13 | ### | .         | A     | AG  | . | PASS | CCDC169, | intronic   | NM_00114 |
| ACa07 | 13 | ### | rs7166969 | TG    | T   | . | PASS | CARS2    | intronic   | NM_02453 |
| ACa07 | 14 | ### | .         | G     | GA  | . | PASS | SAMD4A   | exonic     | NM_00116 |
| ACa07 | 14 | ### | .         | GA    | G   | . | PASS | KIAA0586 | exonic     | NM_00124 |
| ACa07 | 14 | ### | rs1134746 | CT    | C   | . | PASS | DAAM1    | intronic   | NM_00127 |
| ACa07 | 14 | ### | rs5526989 | TA    | T   | . | PASS | ACTN1    | intronic   | NM_00110 |
| ACa07 | 14 | ### | .         | CT    | C   | . | PASS | UNC79    | exonic     | NM_02081 |
| ACa07 | 14 | ### | .         | AT    | A   | . | PASS | ATG2B    | intronic   | NM_01803 |
| ACa07 | 14 | ### | .         | AC    | A   | . | PASS | CRIP1    | intronic   | NM_00131 |
| ACa07 | 15 | ### | rs1451472 | CT    | C   | . | PASS | NIPA2    | exonic     | NM_00100 |
| ACa07 | 15 | ### | .         | CT    | C   | . | PASS | STARD9   | intronic   | NM_02075 |
| ACa07 | 15 | ### | rs7643803 | CA    | C   | . | PASS | RNU6-28P | ncRNA_int  | NR_04648 |
| ACa07 | 15 | ### | .         | CT    | C   | . | PASS | TP53BP1  | exonic     | NM_00114 |
| ACa07 | 15 | ### | .         | CTG   | C   | . | PASS | GALK2    | exonic     | NM_00100 |

|       |    |     |           |         |      |   |      |          |            |          |
|-------|----|-----|-----------|---------|------|---|------|----------|------------|----------|
| ACa07 | 15 | ### | rs5635626 | GT      | G    | . | PASS | WDR72    | intronic   | NM_18275 |
| ACa07 | 15 | ### | rs7515595 | T       | TA   | . | PASS | THSD4    | UTR3       | NM_00128 |
| ACa07 | 15 | ### | rs5561116 | C       | CT   | . | PASS | NEO1     | intronic   | NM_00117 |
| ACa07 | 15 | ### | .         | GC      | G    | . | PASS | CD276    | intronic   | NM_00102 |
| ACa07 | 15 | ### | .         | TG      | T    | . | PASS | ALPK3    | exonic     | NM_02077 |
| ACa07 | 15 | ### | rs7643461 | CA      | C    | . | PASS | AGBL1    | exonic     | NM_15233 |
| ACa07 | 15 | ### | .         | GA      | G    | . | PASS | NTRK3    | intronic   | NM_00101 |
| ACa07 | 15 | ### | .         | AC      | A    | . | PASS | KIF7     | exonic     | NM_19852 |
| ACa07 | 15 | ### | .         | GC      | G    | . | PASS | FES      | intronic   | NM_00114 |
| ACa07 | 16 | ### | rs7781350 | G       | GA   | . | PASS | NLRC3    | splicing   | NM_17884 |
| ACa07 | 16 | ### | rs7809656 | GC      | G    | . | PASS | GLIS2    | UTR3       | NM_03257 |
| ACa07 | 16 | ### | rs7491504 | G       | GC   | . | PASS | GLYR1    | exonic     | NM_03256 |
| ACa07 | 16 | ### | .         | CT      | C    | . | PASS | SNX29    | intronic   | NM_03216 |
| ACa07 | 16 | ### | .         | G       | GT   | . | PASS | PDXDC1   | intronic   | NM_00128 |
| ACa07 | 16 | ### | .         | AC      | A    | . | PASS | SEPT1,ZN | intronic   | NM_00121 |
| ACa07 | 16 | ### | rs7570296 | T       | TGA  | . | PASS | SETD1A   | intronic   | NM_01471 |
| ACa07 | 16 | ### | .         | GT      | G    | . | PASS | ADCY7    | intronic   | NM_00111 |
| ACa07 | 16 | ### | rs7817135 | G       | GC   | . | PASS | CDH5     | exonic     | NM_00179 |
| ACa07 | 16 | ### | rs7679025 | CG      | C    | . | PASS | KCTD19   | exonic     | NM_00110 |
| ACa07 | 16 | ### | .         | ACT     | A    | . | PASS | SLC7A6   | intronic   | NM_00107 |
| ACa07 | 16 | ### | .         | T       | TC   | . | PASS | ZNF469   | exonic     | NM_00112 |
| ACa07 | 17 | ### | .         | TA      | T    | . | PASS | GLOD4    | intronic   | NM_01608 |
| ACa07 | 17 | ### | .         | TG      | T    | . | PASS | CLUH     | splicing   | NM_01522 |
| ACa07 | 17 | ### | .         | TG      | T    | . | PASS | TMEM256  | ncRNA_int  | NR_03771 |
| ACa07 | 17 | ### | rs7574964 | AC      | A    | . | PASS | KCNAB3   | exonic     | NM_00473 |
| ACa07 | 17 | ### | .         | GCTT    | G    | . | PASS | MYH10    | exonic     | NM_00125 |
| ACa07 | 17 | ### | rs5285990 | TA      | T    | . | PASS | NF1      | intronic   | NM_00026 |
| ACa07 | 17 | ### | .         | ATC     | A    | . | PASS | ARL5C    | intronic   | NM_00114 |
| ACa07 | 17 | ### | .         | TG      | T    | . | PASS | CDK12    | exonic     | NM_01508 |
| ACa07 | 17 | ### | .         | GA      | G    | . | PASS | STAT5A   | intronic   | NM_00128 |
| ACa07 | 17 | ### | .         | TC      | T    | . | PASS | AOC3     | exonic     | NM_00127 |
| ACa07 | 17 | ### | .         | CT      | C    | . | PASS | GPATCH8  | exonic     | NM_00100 |
| ACa07 | 17 | ### | .         | CCA     | C    | . | PASS | FMNL1    | splicing   | NM_00589 |
| ACa07 | 17 | ### | rs1380173 | T       | TGGA | . | PASS | MYL4     | intronic   | NM_00100 |
| ACa07 | 17 | ### | .         | AC      | A    | . | PASS | SCRN2    | UTR3       | NM_00114 |
| ACa07 | 17 | ### | .         | CG      | C    | . | PASS | TTLL6    | intronic   | NM_00113 |
| ACa07 | 17 | ### | .         | AT      | A    | . | PASS | USP36    | exonic     | NM_02509 |
| ACa07 | 17 | ### | rs7634794 | GC      | G    | . | PASS | ENGASE   | intronic   | NM_00104 |
| ACa07 | 17 | ### | .         | ATGGAAT | A    | . | PASS | .        | intergenic | NM_00116 |
| ACa07 | 17 | ### | rs7487058 | GC      | G    | . | PASS | GPS1     | intronic   | NM_00412 |
| ACa07 | 18 | ### | rs1429731 | AT      | A    | . | PASS | SMCHD1   | intronic   | NM_01529 |
| ACa07 | 18 | ### | rs7500268 | TC      | T    | . | PASS | CIDEA    | intronic   | NM_00127 |
| ACa07 | 18 | ### | .         | GT      | G    | . | PASS | LDLRAD4  | intronic   | NM_00100 |
| ACa07 | 18 | ### | .         | C       | CA   | . | PASS | NPC1     | exonic     | NM_00027 |
| ACa07 | 18 | ### | rs7661354 | CT      | C    | . | PASS | TAF4B    | intronic   | NM_00129 |
| ACa07 | 18 | ### | .         | GA      | G    | . | PASS | C18orf21 | intronic   | NM_00120 |
| ACa07 | 18 | ### | rs5710814 | G       | GC   | . | PASS | LOXHD1   | intronic   | NM_00114 |
| ACa07 | 18 | ### | rs1019291 | CCCT    | C    | . | PASS | SMAD7    | exonic     | NM_00119 |
| ACa07 | 18 | ### | rs7630535 | T       | TC   | . | PASS | ALPK2    | exonic     | NM_05294 |
| ACa07 | 19 | ### | .         | GA      | G    | . | PASS | SBNO2    | intronic   | NM_00110 |
| ACa07 | 19 | ### | .         | GC      | G    | . | PASS | DAZAP1   | exonic     | NM_01895 |
| ACa07 | 19 | ### | rs7644591 | CG      | C    | . | PASS | ZFR2     | exonic     | NM_01517 |
| ACa07 | 19 | ### | .         | G       | GC   | . | PASS | NMRK2    | intronic   | NM_00128 |
| ACa07 | 19 | ### | .         | TC      | T    | . | PASS | DPP9     | intronic   | NM_13915 |

|       |        |               |    |   |      |          |            |          |
|-------|--------|---------------|----|---|------|----------|------------|----------|
| ACa07 | 19 ### | . GC          | G  | . | PASS | .        | intronic   | NM_00129 |
| ACa07 | 19 ### | rs7590798 GA  | G  | . | PASS | PTPRS    | intronic   | NM_00285 |
| ACa07 | 19 ### | . CG          | C  | . | PASS | PTPRS    | exonic     | NM_00285 |
| ACa07 | 19 ### | rs7708014 GC  | G  | . | PASS | GTF2F1   | intronic   | NM_00209 |
| ACa07 | 19 ### | . TG          | T  | . | PASS | C3       | exonic     | NM_00006 |
| ACa07 | 19 ### | . TG          | T  | . | PASS | MYO1F    | intronic   | NM_01233 |
| ACa07 | 19 ### | . GT          | G  | . | PASS | DAND5    | intronic   | NM_15265 |
| ACa07 | 19 ### | . GAGA        | G  | . | PASS | JAK3     | intronic   | NM_00021 |
| ACa07 | 19 ### | rs7799007 TC  | T  | . | PASS | CRTC1    | exonic     | NM_00109 |
| ACa07 | 19 ### | rs7677659 C   | CA | . | PASS | WDR88    | intronic   | NM_17347 |
| ACa07 | 19 ### | . CA          | C  | . | PASS | UBA2     | intronic   | NM_00549 |
| ACa07 | 19 ### | . CG          | C  | . | PASS | .        | downstream | NM_00530 |
| ACa07 | 19 ### | . AC          | A  | . | PASS | KMT2B    | exonic     | NM_01472 |
| ACa07 | 19 ### | rs9414440 GA  | G  | . | PASS | ZNF382   | exonic     | NM_00125 |
| ACa07 | 19 ### | . A           | AT | . | PASS | ZNF793   | intronic   | NM_00101 |
| ACa07 | 19 ### | . GC          | G  | . | PASS | SIPA1L3  | exonic     | NM_01507 |
| ACa07 | 19 ### | . T           | TC | . | PASS | .        | intergenic | NM_00130 |
| ACa07 | 19 ### | rs7662018 TC  | T  | . | PASS | PHLDB3   | exonic     | NM_19885 |
| ACa07 | 19 ### | . TG          | T  | . | PASS | NKPD1    | exonic     | NM_19847 |
| ACa07 | 19 ### | . CG          | C  | . | PASS | MARK4    | exonic     | NM_00119 |
| ACa07 | 19 ### | rs7520653 C   | CG | . | PASS | EML2     | intronic   | NM_00119 |
| ACa07 | 19 ### | . GA          | G  | . | PASS | SNRPD2   | UTR3       | NM_00459 |
| ACa07 | 19 ### | . AC          | A  | . | PASS | PNMAL2   | exonic     | NM_02070 |
| ACa07 | 19 ### | rs7555061 A   | AC | . | PASS | GLTSCR1  | exonic     | NM_01571 |
| ACa07 | 19 ### | rs3981228 T   | TG | . | PASS | BAX      | exonic     | NM_00129 |
| ACa07 | 19 ### | . CG          | C  | . | PASS | RRAS     | intronic   | NM_00627 |
| ACa07 | 19 ### | . TC          | T  | . | PASS | NAPSA    | intronic   | NM_00485 |
| ACa07 | 19 ### | rs7666986 CAG | C  | . | PASS | SIGLEC8  | intronic   | NM_01444 |
| ACa07 | 19 ### | . T           | TG | . | PASS | LILRB5   | UTR3       | NM_00108 |
| ACa07 | 19 ### | . TC          | T  | . | PASS | TTYH1    | intronic   | NM_00100 |
| ACa07 | 19 ### | rs7811378 A   | AC | . | PASS | BRSK1    | exonic     | NM_03243 |
| ACa07 | 19 ### | . AC          | A  | . | PASS | UBE2M    | intronic   | NM_00396 |
| ACa07 | 20 ### | . GC          | G  | . | PASS | EBF4     | intronic   | NM_00111 |
| ACa07 | 20 ### | rs7575646 GA  | G  | . | PASS | RNF24    | intronic   | NM_00113 |
| ACa07 | 20 ### | rs3605176 CT  | C  | . | PASS | ESF1     | intronic   | NM_00127 |
| ACa07 | 20 ### | . GC          | G  | . | PASS | RRBP1    | intronic   | NM_00104 |
| ACa07 | 20 ### | rs1085307 A   | AG | . | PASS | ASXL1    | exonic     | NM_01533 |
| ACa07 | 20 ### | rs7539299 C   | CG | . | PASS | ACSS2    | intronic   | NM_00107 |
| ACa07 | 20 ### | . CA          | C  | . | PASS | DLGAP4-A | ncRNA_int  | NR_10993 |
| ACa07 | 20 ### | rs7511829 TG  | T  | . | PASS | NDRG3    | splicing   | NM_02247 |
| ACa07 | 20 ### | rs7684989 C   | CT | . | PASS | EYA2     | intronic   | NM_00524 |
| ACa07 | 20 ### | rs7667143 CA  | C  | . | PASS | DDX27    | exonic     | NM_01789 |
| ACa07 | 20 ### | rs9359712 AC  | A  | . | PASS | KCNQ2    | intronic   | NM_00451 |
| ACa07 | 20 ### | . GC          | G  | . | PASS | HELZ2    | intronic   | NM_00103 |
| ACa07 | 21 ### | rs3687317 AG  | A  | . | PASS | .        | intergenic | NR_10992 |
| ACa07 | 21 ### | rs7538174 GC  | G  | . | PASS | FTCD     | exonic     | NM_00665 |
| ACa07 | 21 ### | rs7755389 C   | CG | . | PASS | MCM3AP   | exonic     | NM_00390 |
| ACa07 | 22 ### | rs2001464 TC  | T  | . | PASS | .        | upstream   | NM_00124 |
| ACa07 | 22 ### | . TC          | T  | . | PASS | CRYBB2P  | ncRNA_int  | NR_03373 |
| ACa07 | 22 ### | . AG          | A  | . | PASS | MN1      | exonic     | NM_00243 |
| ACa07 | 22 ### | . CT          | C  | . | PASS | SFI1     | intronic   | NM_00100 |
| ACa07 | 22 ### | rs7686708 AG  | A  | . | PASS | ELFN2    | UTR3       | NM_05290 |
| ACa07 | 22 ### | . AC          | A  | . | PASS | CDC42EP  | exonic     | NM_15224 |
| ACa07 | 22 ### | . GC          | G  | . | PASS | SERHL    | ncRNA_int  | NR_02778 |

|           |     |           |           |         |          |         |      |            |            |          |          |
|-----------|-----|-----------|-----------|---------|----------|---------|------|------------|------------|----------|----------|
| ACa07     | 22  | ###       | rs7743082 | A       | AC       | .       | PASS | GTSE1      | exonic     | NM_01642 |          |
| ACa07     | 22  | ###       | .         |         | AC       | A       | .    | PASS       | TRABD      | intronic | NM_02520 |
| ACa07     | X   | ###       | .         |         | GT       | G       | .    | PASS       | PPP2R3B    | exonic   | NM_01323 |
| ACa07     | X   | ###       | rs7631509 | CT      | C        | .       | PASS | STS        | intronic   | NM_00035 |          |
| ACa07     | X   | ###       | .         |         | G        | GC      | .    | PASS       | MAP7D2     | intronic | NM_00116 |
| ACa07     | X   | ###       | rs7752182 | A       | AT       | .       | PASS | DDX3X      | intronic   | NM_00119 |          |
| ACa07     | X   | ###       | rs7515575 | AG      | A        | .       | PASS | ELK1       | intronic   | NM_00111 |          |
| ACa07     | X   | ###       | rs7821251 | A       | AC       | .       | PASS | SLC35A2    | intronic   | NM_00103 |          |
| ACa07     | X   | ###       | .         |         | T        | TG      | .    | PASS       | SYP-AS1    | ncRNA_ex | NR_04664 |
| ACa07     | X   | ###       | .         |         | G        | GC      | .    | PASS       | AKAP4      | intronic | NM_00388 |
| ACa07     | X   | ###       | .         |         | TG       | T       | .    | PASS       | MAGEE2     | exonic   | NM_13870 |
| ACa07     | X   | ###       | rs1064795 | CG      | C        | .       | PASS | SLC9A6     | UTR5       | NM_00104 |          |
| ACa07     | X   | ###       | rs7823430 | A       | AG       | .       | PASS | PLXNB3     | exonic     | NM_00116 |          |
| ACaP01    | 6   | ###       | .         |         | CCCG     | C       | .    | PASS       | FOXC1      | exonic   | NM_00145 |
| ACaP01    | 11  | ###       | .         |         | A        | AGGTGCT | .    | PASS       | SERPINH1   | splicing | NM_00120 |
| ACaP01    | 19  | ###       | .         |         | C        | CCTGAAG | .    | PASS       | SBNO2      | intronic | NM_00110 |
| ACaP02    | 1   | ###       | .         |         | CCATCTT  | C       | .    | PASS       | HYI,SZT2   | UTR3     | NM_00119 |
| ACaP02    | 2   | ###       | rs7485648 | AGCACTG | A        | .       | PASS | DAPL1      | UTR5       | NM_00101 |          |
| ACaP02    | 3   | ###       | .         |         | GTCTCCCG | .       | PASS | KCNH8      | exonic     | NM_14463 |          |
| ACaP02    | 13  | ###       | .         |         | CATTTGT  | C       | .    | PASS       | LRCH1      | intronic | NM_00116 |
| ACaP02    | 14  | ###       | rs9344233 | GGAGGC  | G        | .       | PASS | CCDC177    | exonic     | NM_00127 |          |
| ACaP02    | 15  | ###       | rs4036589 | T       | TTGTGC   | .       | PASS | .          | intergenic | NR_03884 |          |
| ACaP03    | 1   | ###       | rs1062553 | G       | GGAA     | .       | PASS | SSBP3      | UTR3       | NM_00100 |          |
| ACaP03    | 2   | ###       | .         |         | A        | AGGAGG  | .    | PASS       | INSIG2     | intronic | NM_01613 |
| ACaP03    | 2   | ###       | rs3707030 | AGGAGG  | A        | .       | PASS | INSIG2     | intronic   | NM_01613 |          |
| ACaP03    | 6   | ###       | .         |         | ATCCTCC  | A       | .    | PASS       | RRAGD      | exonic   | NM_02124 |
| ACaP03    | 9   | ###       | .         |         | T        | TTCACGG | .    | PASS       | WDR38      | intronic | NM_00104 |
| ACaP03    | 17  | ###       | .         |         | CGGATGC  | C       | .    | PASS       | NPTX1      | exonic   | NM_00252 |
| ACaP03    | 18  | ###       | .         |         | GCGTCC   | G       | .    | PASS       | FHOD3      | UTR5     | NM_00128 |
| ACaP04    | 2   | ###       | .         |         | ACTCAAT  | A       | .    | PASS       | ZAK        | exonic   | NM_01665 |
| ACaP04    | 4   | ###       | rs8860593 | AAAAAC  | A        | .       | PASS | SEPSECS    | UTR5       | NM_01695 |          |
| ACaP04    | 7   | ###       | .         |         | TCCATGT  | T       | .    | PASS       | CYTH3      | exonic   | NM_00422 |
| ACaP04    | 11  | ###       | .         |         | AGGTGTCA | .       | PASS | .          | intergenic | NONE,NR_ |          |
| ACaP04    | 14  | ###       | rs9488701 | ACTCCT  | A        | .       | PASS | SALL2      | exonic     | NM_00540 |          |
| ACaP04    | 17  | ###       | rs1047246 | CCAGTA  | C        | .       | PASS | CHD3       | intronic   | NM_00100 |          |
| ACaP05    | 1   | ###       | .         |         | AGAGTT   | A       | .    | PASS       | NBPF14,N   | exonic   | NM_00103 |
| ACaP06    | 2   | ###       | .         |         | CCGGGA   | C       | .    | PASS       | PDK1       | intronic | NM_00127 |
| ACaP06    | 6   | ###       | .         |         | GCCAAG   | C       | .    | PASS       | SYNJ2      | exonic   | NM_00389 |
| ACaP06    | 12  | ###       | .         |         | GA       | G       | .    | PASS       | POLE       | exonic   | NM_00623 |
| ACaP06    | 17  | ###       | .         |         | G        | GCAA    | .    | PASS       | TP53       | exonic   | NM_00054 |
| ACaP06    | 19  | ###       | .         |         | A        | ACGC    | .    | PASS       | TRPM4      | exonic   | NM_00119 |
| ACaP06    | 19  | ###       | .         |         | TGGGGA   | T       | .    | PASS       | SHANK1     | exonic   | NM_01614 |
| ACaP06    | 22  | ###       | rs3980370 | G       | GT       | .       | PASS | CACNG2     | UTR3       | NM_00607 |          |
| ACaP07    | 3   | ###       | .         |         | AAGTTGCA | .       | PASS | IGF2BP2    | intronic   | NM_00100 |          |
| ACaP07    | 4   | ###       | rs7562167 | CGAGGA  | C        | .       | PASS | UTP3       | exonic     | NM_02036 |          |
| ACaP07    | 10  | ###       | rs7459278 | GGCCGC  | G        | .       | PASS | SKIDA1     | exonic     | NM_20737 |          |
| ACaP07    | 16  | ###       | .         |         | AC       | A       | .    | PASS       | CHTF18     | exonic   | NM_02209 |
| ACaP07    | 17  | ###       | .         |         | CGCCGC   | C       | .    | PASS       | HOXB6      | exonic   | NM_01895 |
| ACaP07    | 19  | ###       | .         |         | A        | AG      | .    | PASS       | PSENNEN    | splicing | NM_00128 |
| ACaP07 MT | ### | rs2676066 | A         | AC      | .        | PASS    | .    | intergenic | NONE,NOI   |          |          |
| ACaP09    | 20  | ###       | .         |         | C        | CGCGGG  | .    | PASS       | NDUFAF5    | intronic | NM_00103 |
| ACaP10    | 17  | ###       | .         |         | GC       | G       | .    | PASS       | FLII       | intronic | NM_00125 |
| ACaP11    | 1   | ###       | rs7519299 | C       | CG       | .       | PASS | TIE1       | intronic   | NM_00125 |          |
| ACaP11    | 8   | ###       | .         |         | CCCCAAAC | .       | PASS | SGCZ       | exonic     | NM_13916 |          |



|          |                  |         |        |   |      |          |            |          |
|----------|------------------|---------|--------|---|------|----------|------------|----------|
| ACaP11   | 9 ### .          | T       | TG     | . | PASS | ENTPD2   | exonic     | NM_00124 |
| ACaP11   | 11 ### .         | ATCT    | A      | . | PASS | NTM      | intronic   | NM_00104 |
| ACaP11   | 14 ### .         | T       | TA     | . | PASS | RDH11    | intronic   | NM_00125 |
| ACaP11   | 22 ### rs7666083 | CGGGCG  | C      | . | PASS | TCF20    | UTR3       | NM_00565 |
| ACaP12   | 2 ### .          | C       | CTTG   | . | PASS | KLHL29   | intronic   | NM_05292 |
| ACaP12   | 5 ### .          | CAAGGG  | C      | . | PASS | .        | intergenic | NM_02291 |
| ACaP12   | 9 ### .          | G       | GC     | . | PASS | ODF2     | intronic   | NM_00124 |
| ACaP12   | 11 ### rs7788921 | CCAGCAC | C      | . | PASS | DCHS1    | exonic     | NM_00373 |
| ACaP12   | 12 ### .         | TA      | T      | . | PASS | CD69     | intronic   | NM_00178 |
| ACaP12   | 13 ### rs7743913 | TTTTTG  | T      | . | PASS | DOCK9    | intronic   | NM_00113 |
| ACaP12   | 14 ### rs7758009 | CG      | C      | . | PASS | SPATA7   | exonic     | NM_00104 |
| ACaP12   | 16 ### .         | G       | GT     | . | PASS | CBFB     | splicing   | NM_00175 |
| ACaP12   | 17 ### .         | A       | AATTCT | . | PASS | TVP23C-C | intronic   | NM_00120 |
| ACaP12   | 17 ### .         | AGAGCG  | A      | . | PASS | NARR,RAI | UTR5       | NM_00114 |
| ACaP12   | 21 ### rs7645628 | CCCAGG  | C      | . | PASS | COL18A1  | exonic     | NM_03058 |
| ACaP12   | 22 ### .         | AGAGCC  | A      | . | PASS | .        | intergenic | NR_00360 |
| ACaP12 X | ### .            | GCCGCG  | G      | . | PASS | RBBP7    | intronic   | NM_00289 |
| ACaP13   | 7 ### .          | CGAGGT  | C      | . | PASS | ZNF316   | exonic     | NM_00127 |
| ACaP13   | 8 ### .          | TTGATCA | T      | . | PASS | ANGPT1   | intronic   | NM_00114 |
| ACaP13   | 11 ### rs6015769 | TA      | T      | . | PASS | BIRC3    | intronic   | NM_00116 |
| ACaP13   | 16 ### rs7596499 | GGGGCC  | G      | . | PASS | CHTF8    | UTR3       | NM_00103 |
| ACaP13   | 19 ### .         | TCCGCC  | T      | . | PASS | SYMPK    | UTR5       | NM_00481 |
| ACaP13   | 19 ### .         | G       | GCTGT  | . | PASS | ZNF419   | exonic     | NM_00109 |
| ACaP13 X | ### .            | C       | CT     | . | PASS | SSX9     | ncRNA_int  | NR_07339 |
| ACaP13 X | ### .            | A       | AT     | . | PASS | COL4A6   | intronic   | NM_00128 |
| ACaP14   | 3 ### .          | AGG     | A      | . | PASS | DOCK3    | exonic     | NM_00494 |
| ACaP14   | 3 ### .          | CTT     | C      | . | PASS | NFKBIZ   | exonic     | NM_00100 |
| ACaP14   | 15 ### .         | GTCTGCC | G      | . | PASS | RGMA     | intronic   | NM_02021 |

| GeneDetail   | ExonicFun  | AAChange  | Genecode:wgRna | cytoBand | targetScan | tfbsConsSi | genomicSu  |
|--------------|------------|-----------|----------------|----------|------------|------------|------------|
| .            | .          | .         | ENST0000.      | 2q14.2   | .          | .          | .          |
| .            | frameshift | CTLA4:NM  | ENST0000.      | 2q33.2   | .          | Score=999. | .          |
| dist=48933.  | .          | .         | .              | 6p11.1   | .          | .          | .          |
| .            | nonframes  | BET1:NM_  | ENST0000.      | 7q21.3   | .          | .          | Score=0.9; |
| .            | .          | .         | ENST0000.      | 12q24.13 | .          | .          | .          |
| .            | frameshift | VPS13C:N  | ENST0000.      | 15q22.2  | .          | .          | .          |
| .            | nonframes  | OR1G1:NM  | ENST0000.      | 17p13.3  | .          | .          | .          |
| .            | .          | .         | ENST0000.      | 19q13.2  | .          | .          | Score=0.9( |
| .            | frameshift | DNMT3L:N  | ENST0000.      | 21q22.3  | .          | .          | .          |
| .            | .          | .         | ENST0000.      | Xp11.22  | .          | .          | .          |
| .            | nonframes  | ANKRD33I  | ENST0000.      | 5p15.2   | .          | Score=807. | .          |
| .            | .          | .         | ENST0000.      | 13q12.3  | .          | .          | .          |
| NM_00110.    | .          | .         | ENST0000.      | 14q24.1  | .          | .          | .          |
| .            | frameshift | ANKLE1:N  | ENST0000.      | 19p13.11 | .          | .          | .          |
| .            | .          | .         | ENST0000.      | 22q12.2  | .          | .          | .          |
| .            | nonframes  | RBM6:NM_  | ENST0000.      | 3p21.31  | .          | Score=905. | .          |
| .            | frameshift | LTBP1:NM  | ENST0000.      | 2p22.3   | .          | Score=979. | .          |
| dist=2844;t. | .          | .         | ENST0000.      | 3q29     | .          | .          | .          |
| .            | .          | .         | ENST0000.      | 16p12.2  | .          | .          | .          |
| .            | .          | .         | ENST0000.      | 16q24.3  | .          | .          | Score=0.9( |
| .            | .          | .         | ENST0000.      | 17p13.1  | .          | .          | Score=0.9( |
| .            | .          | .         | ENST0000.      | 17q25.1  | .          | .          | .          |
| .            | .          | .         | ENST0000.      | 1p36.33  | .          | .          | .          |
| .            | .          | .         | ENST0000.      | 1p36.33  | .          | .          | .          |
| .            | .          | .         | ENST0000.      | 1p36.33  | .          | .          | .          |
| .            | .          | .         | ENST0000.      | 1p36.33  | .          | .          | .          |
| .            | .          | .         | ENST0000.      | 1p36.33  | .          | .          | .          |
| .            | .          | .         | ENST0000.      | 1p36.33  | .          | .          | .          |
| .            | .          | .         | ENST0000.      | 1p36.22  | .          | .          | .          |
| .            | frameshift | UBR4:NM_  | ENST0000.      | 1p36.13  | .          | .          | .          |
| .            | frameshift | ARID1A:NI | ENST0000.      | 1p36.11  | .          | Score=894. | .          |
| .            | .          | .         | ENST0000.      | 1p34.3   | .          | .          | .          |
| .            | .          | .         | ENST0000.      | 1p34.3   | .          | .          | .          |
| .            | .          | .         | ENST0000.      | 1p34.2   | .          | .          | .          |
| .            | .          | .         | ENST0000.      | 1p31.3   | .          | .          | .          |
| .            | frameshift | COL24A1:I | ENST0000.      | 1p22.3   | .          | .          | .          |
| .            | .          | .         | ENST0000.      | 1p13.3   | .          | .          | .          |
| .            | .          | .         | ENST0000.      | 1p13.2   | .          | .          | .          |
| .            | .          | .         | ENST0000.      | 1q21.2   | .          | .          | .          |
| .            | frameshift | UBE2Q1:N  | ENST0000.      | 1q21.3   | .          | Score=833. | .          |
| .            | frameshift | CLK2:NM_  | ENST0000.      | 1q22     | .          | Score=851. | .          |
| .            | .          | .         | ENST0000.      | 1q22     | .          | .          | .          |
| .            | .          | .         | ENST0000.      | 1q23.1   | .          | .          | .          |
| .            | .          | .         | ENST0000.      | 1q25.2   | .          | .          | .          |
| .            | frameshift | AXDND1:M  | ENST0000.      | 1q25.2   | .          | .          | .          |
| NM_00135.    | .          | .         | ENST0000.      | 1q25.3   | .          | .          | .          |
| .            | .          | .         | ENST0000.      | 1q31.3   | .          | .          | .          |
| .            | frameshift | PLEKHA6:  | ENST0000.      | 1q32.1   | .          | Score=888. | .          |
| .            | .          | .         | ENST0000.      | 1q42.12  | .          | .          | .          |
| .            | .          | .         | ENST0000.      | 1q42.13  | .          | .          | .          |
| .            | .          | .         | ENST0000.      | 1q42.2   | .          | .          | .          |
| dist=20359.  | .          | .         | .              | 2p25.1   | .          | .          | .          |

|             |            |           |           |         |   |            |
|-------------|------------|-----------|-----------|---------|---|------------|
| .           | frameshift | ROCK2:NM  | ENST0000. | 2p25.1  | . | Score=935. |
| .           | .          | .         | ENST0000. | 2p23.3  | . | .          |
| .           | .          | .         | ENST0000. | 2p23.2  | . | .          |
| dist=64458. | .          | .         | ENST0000. | 2p22.1  | . | Score=0.9; |
| .           | .          | .         | ENST0000. | 2p21    | . | .          |
| .           | frameshift | MTIF2:NM  | ENST0000. | 2p16.1  | . | .          |
| .           | frameshift | LOXL3:NM  | ENST0000. | 2p13.1  | . | .          |
| .           | .          | .         | ENST0000. | 2p11.2  | . | .          |
| .           | .          | .         | ENST0000. | 2q11.2  | . | .          |
| .           | .          | .         | ENST0000. | 2q14.2  | . | .          |
| .           | frameshift | ACVR2A:NM | ENST0000. | 2q22.3  | . | .          |
| .           | frameshift | CSRNP3:NM | ENST0000. | 2q24.3  | . | .          |
| .           | .          | .         | ENST0000. | 2q24.3  | . | .          |
| .           | frameshift | XIRP2:NM  | ENST0000. | 2q24.3  | . | .          |
| .           | frameshift | ATF2:NM_  | ENST0000. | 2q31.1  | . | .          |
| .           | .          | .         | ENST0000. | 2q31.2  | . | .          |
| .           | .          | .         | ENST0000. | 2q31.2  | . | .          |
| .           | stopgain   | TTN:NM_C  | ENST0000. | 2q31.2  | . | .          |
| .           | frameshift | STAT1:NM  | ENST0000. | 2q32.2  | . | .          |
| .           | .          | .         | ENST0000. | 2q33.1  | . | .          |
| .           | .          | .         | ENST0000. | 2q33.1  | . | .          |
| .           | frameshift | ADAM23:NM | ENST0000. | 2q33.3  | . | .          |
| .           | frameshift | FASTKD2:  | ENST0000. | 2q33.3  | . | .          |
| .           | .          | .         | ENST0000. | 2q33.3  | . | .          |
| NM_00100.   | .          | .         | ENST0000. | 2q35    | . | .          |
| .           | frameshift | SPHKAP:NM | ENST0000. | 2q36.3  | . | .          |
| .           | frameshift | DNAJB3:NM | ENST0000. | 2q37.1  | . | Score=0.9; |
| .           | .          | .         | ENST0000. | 2q37.3  | . | .          |
| .           | frameshift | CNTN6:NM  | ENST0000. | 3p26.3  | . | Score=844. |
| NM_15253.   | .          | .         | ENST0000. | 3p25.1  | . | .          |
| .           | .          | .         | ENST0000. | 3p24.2  | . | .          |
| .           | .          | .         | ENST0000. | 3p21.31 | . | .          |
| .           | nonframes  | PTPN23:NM | ENST0000. | 3p21.31 | . | .          |
| .           | frameshift | RBM6:NM_  | ENST0000. | 3p21.31 | . | .          |
| .           | .          | .         | ENST0000. | 3p21.2  | . | .          |
| .           | frameshift | PRKCD:NM  | ENST0000. | 3p21.1  | . | .          |
| .           | .          | .         | ENST0000. | 3p21.1  | . | .          |
| .           | .          | .         | ENST0000. | 3q13.2  | . | .          |
| .           | .          | .         | ENST0000. | 3q21.3  | . | .          |
| .           | frameshift | FAIM:NM_  | ENST0000. | 3q22.3  | . | .          |
| .           | .          | .         | ENST0000. | 3q25.1  | . | .          |
| .           | .          | .         | ENST0000. | 3q25.1  | . | .          |
| .           | .          | .         | ENST0000. | 3q26.31 | . | .          |
| .           | .          | .         | ENST0000. | 3q27.1  | . | .          |
| .           | .          | .         | ENST0000. | 4p16.3  | . | .          |
| .           | frameshift | UVSSA:NM  | ENST0000. | 4p16.3  | . | .          |
| dist=49825. | .          | .         | ENST0000. | 4p16.1  | . | .          |
| .           | .          | .         | ENST0000. | 4p14    | . | .          |
| .           | .          | .         | ENST0000. | 4p13    | . | .          |
| .           | nonframes  | SCFD2:NM  | ENST0000. | 4q12    | . | .          |
| .           | .          | .         | ENST0000. | 4q12    | . | .          |
| .           | frameshift | PRDM8:NM  | ENST0000. | 4q21.21 | . | .          |
| .           | .          | .         | ENST0000. | 4q22.3  | . | .          |
| .           | .          | .         | ENST0000. | 4q25    | . | .          |

|             |            |            |           |         |   |            |
|-------------|------------|------------|-----------|---------|---|------------|
| .           | .          | ENST0000.  | 4q26      | .       | . | .          |
| .           | frameshift | ARSJ:NM_   | ENST0000. | 4q26    | . | .          |
| .           | nonframes  | FAT4:NM_   | ENST0000. | 4q28.1  | . | Score=956. |
| .           | frameshift | NEIL3:NM_  | ENST0000. | 4q34.3  | . | .          |
| .           | .          | ENST0000.  | 4q35.2    | .       | . | Score=0.94 |
| .           | .          | ENST0000.  | 5p15.33   | .       | . | Score=0.94 |
| .           | frameshift | TRIO:NM_   | ENST0000. | 5p15.2  | . | .          |
| NM_05402.   | .          | ENST0000.  | 5p15.2    | .       | . | .          |
| .           | .          | ENST0000.  | 5p13.3    | .       | . | .          |
| .           | .          | ENST0000.  | 5p13.2    | .       | . | .          |
| .           | .          | ENST0000.  | 5p13.1    | .       | . | .          |
| .           | .          | ENST0000.  | 5q13.3    | .       | . | .          |
| .           | .          | ENST0000.  | 5q14.1    | .       | . | .          |
| .           | .          | ENST0000.  | 5q31.3    | .       | . | .          |
| .           | frameshift | PCDHGA3    | ENST0000. | 5q31.3  | . | .          |
| .           | frameshift | LARP1:NM   | ENST0000. | 5q33.2  | . | .          |
| .           | frameshift | SLIT3:NM_  | ENST0000. | 5q34    | . | Score=781. |
| .           | .          | ENST0000.  | 5q34      | .       | . | .          |
| .           | .          | ENST0000.  | 6p22.1    | .       | . | .          |
| .           | .          | ENST0000.  | 6p21.33   | .       | . | Score=0.94 |
| .           | .          | ENST0000.  | 6p21.33   | .       | . | .          |
| .           | frameshift | AGER:NM_   | ENST0000. | 6p21.32 | . | .          |
| .           | .          | ENST0000.  | 6p21.32   | .       | . | Score=0.94 |
| .           | .          | ENST0000.  | 6p21.32   | .       | . | .          |
| .           | frameshift | C6orf89:NI | ENST0000. | 6p21.2  | . | Score=724. |
| .           | frameshift | FOXP4:NM   | ENST0000. | 6p21.1  | . | Score=998. |
| .           | .          | ENST0000.  | 6q14.1    | .       | . | Score=0.94 |
| NM_01549.   | .          | ENST0000.  | 6q16.2    | .       | . | .          |
| .           | .          | ENST0000.  | 6q16.3    | .       | . | .          |
| .           | frameshift | GRIK2:NM   | ENST0000. | 6q16.3  | . | Score=835. |
| .           | frameshift | BEND3:NM   | ENST0000. | 6q21    | . | .          |
| .           | .          | ENST0000.  | 6q21      | .       | . | .          |
| .           | frameshift | TRAF3IP2:  | ENST0000. | 6q21    | . | .          |
| .           | .          | ENST0000.  | 6q21      | .       | . | .          |
| .           | frameshift | TBC1D32:NI | ENST0000. | 6q22.31 | . | Score=837. |
| .           | frameshift | HBS1L:NM   | ENST0000. | 6q23.3  | . | Score=0.94 |
| .           | frameshift | PHACTR2:   | ENST0000. | 6q24.2  | . | .          |
| .           | .          | ENST0000.  | 6q25.3    | .       | . | .          |
| .           | .          | ENST0000.  | 6q25.3    | .       | . | .          |
| dist=NONE.  | .          | ENST0000.  | 7p22.3    | .       | . | Score=0.94 |
| dist=46754. | .          | .          | 7p22.3    | .       | . | .          |
| .           | frameshift | RADIL:NM   | ENST0000. | 7p22.1  | . | .          |
| .           | frameshift | TNRC18:NI  | ENST0000. | 7p22.1  | . | Score=858. |
| NM_00592.   | .          | ENST0000.  | 7p21.2    | .       | . | .          |
| dist=21149. | .          | ENST0000.  | 7p15.2    | .       | . | Score=0.84 |
| .           | .          | ENST0000.  | 7p14.3    | .       | . | .          |
| .           | frameshift | NOD1:NM_   | ENST0000. | 7p14.3  | . | .          |
| .           | frameshift | LANCL2:NI  | ENST0000. | 7p11.2  | . | .          |
| .           | frameshift | ZNF716:NI  | ENST0000. | 7p11.2  | . | Score=0.84 |
| .           | .          | ENST0000.  | 7q11.23   | .       | . | .          |
| .           | .          | ENST0000.  | 7q11.23   | .       | . | .          |
| .           | .          | ENST0000.  | 7q22.1    | .       | . | .          |
| .           | frameshift | NYAP1:NM   | ENST0000. | 7q22.1  | . | .          |
| .           | .          | ENST0000.  | 7q22.1    | .       | . | .          |

|              |            |               |           |          |             |            |
|--------------|------------|---------------|-----------|----------|-------------|------------|
| .            | frameshift | CUX1:NM_      | ENST0000. | 7q22.1   | .           | Score=824. |
| .            | nonframes  | LMOD2:NM_     | ENST0000. | 7q31.32  | .           | .          |
| .            | .          | .             | ENST0000. | 7q33     | .           | Score=0.9; |
| .            | unknown    | UNKNOWI       | ENST0000. | 7q36.1   | .           | Score=822. |
| .            | .          | .             | ENST0000. | 7q36.2   | .           | .          |
| .            | .          | .             | ENST0000. | 8p22     | .           | .          |
| .            | .          | .             | ENST0000. | 8p22     | .           | .          |
| dist=2934;f. | .          | .             | ENST0000. | 8p21.3   | .           | Score=946. |
| dist=25494.  | .          | .             | ENST0000. | 8p21.2   | .           | .          |
| .            | .          | .             | ENST0000. | 8p12     | .           | .          |
| .            | .          | .             | ENST0000. | 8p11.22  | .           | .          |
| .            | .          | .             | ENST0000. | 8q12.1   | .           | .          |
| NM_00128.    | .          | .             | ENST0000. | 8q21.13  | .           | .          |
| .            | frameshift | ESRP1:NM_     | ENST0000. | 8q22.1   | .           | .          |
| .            | .          | .             | ENST0000. | 8q22.3   | .           | .          |
| .            | .          | .             | ENST0000. | 8q24.22  | .           | .          |
| .            | .          | .             | ENST0000. | 8q24.3   | .           | .          |
| .            | frameshift | CYC1:NM_      | ENST0000. | 8q24.3   | .           | Score=904. |
| .            | .          | .             | ENST0000. | 9p21.2   | .           | .          |
| NM_00113.    | .          | .             | ENST0000. | 9p13.3   | Score=98;l. | .          |
| .            | frameshift | TLN1:NM_      | ENST0000. | 9p13.3   | .           | .          |
| dist=15610.  | .          | .             | ENST0000. | 9p11.2   | .           | Score=0.9f |
| .            | frameshift | PHF2:NM_      | ENST0000. | 9q22.31  | .           | .          |
| .            | frameshift | PTCH1:NM_     | ENST0000. | 9q22.32  | .           | .          |
| NM_00108.    | .          | .             | ENST0000. | 9q22.32  | .           | .          |
| .            | .          | .             | ENST0000. | 9q31.3   | .           | .          |
| .            | frameshift | OR1L3:NM_     | ENST0000. | 9q33.2   | .           | .          |
| .            | nonframes  | STRBP:NM_     | ENST0000. | 9q33.3   | .           | .          |
| .            | .          | .             | ENST0000. | 9q33.3   | .           | .          |
| .            | .          | .             | ENST0000. | 9q34.11  | .           | .          |
| .            | .          | .             | ENST0000. | 9q34.13  | .           | .          |
| .            | frameshift | PMPCA:NI      | ENST0000. | 9q34.3   | .           | .          |
| .            | .          | .             | ENST0000. | 9q34.3   | .           | .          |
| .            | .          | .             | ENST0000. | 9q34.3   | .           | .          |
| .            | frameshift | C9orf142:NM_  | ENST0000. | 9q34.3   | .           | .          |
| .            | frameshift | SFMBT2:NM_    | ENST0000. | 10p14    | .           | .          |
| .            | .          | .             | ENST0000. | 10p12.1  | .           | .          |
| .            | frameshift | C10orf126:NM_ | ENST0000. | 10p12.1  | .           | .          |
| .            | .          | .             | ENST0000. | 10q11.22 | .           | Score=0.9f |
| NM_00128.    | .          | .             | ENST0000. | 10q21.3  | .           | .          |
| .            | .          | .             | ENST0000. | 10q22.1  | .           | .          |
| .            | frameshift | ADAMTS1:NM_   | ENST0000. | 10q22.1  | .           | .          |
| .            | frameshift | ZSWIM8:NM_    | ENST0000. | 10q22.2  | .           | Score=991. |
| .            | .          | .             | ENST0000. | 10q22.3  | .           | .          |
| .            | .          | .             | ENST0000. | 10q22.3  | .           | .          |
| .            | nonframes  | AGAP11:NM_    | ENST0000. | 10q23.2  | .           | Score=0.9f |
| .            | .          | .             | ENST0000. | 10q23.33 | .           | .          |
| .            | .          | .             | ENST0000. | 10q24.33 | .           | .          |
| .            | .          | .             | ENST0000. | 10q26.13 | .           | .          |
| .            | .          | .             | ENST0000. | 10q26.3  | .           | .          |
| .            | .          | .             | ENST0000. | 11p15.5  | .           | Score=0.9f |
| .            | frameshift | B4GALNT2:NM_  | ENST0000. | 11p15.5  | .           | .          |
| .            | frameshift | BRSK2:NM_     | ENST0000. | 11p15.5  | .           | .          |
| .            | .          | .             | ENST0000. | 11p15.4  | .           | .          |

|              |            |            |           |          |   |            |            |
|--------------|------------|------------|-----------|----------|---|------------|------------|
| .            | frameshift | RBMXL2:N   | ENST0000. | 11p15.4  | . | .          | .          |
| .            | .          | .          | ENST0000. | 11p15.4  | . | .          | .          |
| .            | .          | .          | ENST0000. | 11p15.1  | . | .          | .          |
| .            | .          | .          | ENST0000. | 11p14.2  | . | .          | .          |
| .            | .          | .          | ENST0000. | 11p11.2  | . | .          | .          |
| .            | frameshift | MAPK8IP1   | ENST0000. | 11p11.2  | . | .          | .          |
| .            | frameshift | EML3:NM_   | ENST0000. | 11q12.3  | . | .          | .          |
| .            | .          | .          | ENST0000. | 11q13.2  | . | .          | Score=0.94 |
| .            | .          | .          | ENST0000. | 11q13.2  | . | .          | .          |
| .            | .          | .          | .         | 11q13.4  | . | .          | Score=0.94 |
| .            | frameshift | USP35:NM   | ENST0000. | 11q14.1  | . | Score=882. | .          |
| .            | .          | .          | ENST0000. | 11q14.1  | . | .          | .          |
| .            | frameshift | FAT3:NM_   | ENST0000. | 11q14.3  | . | .          | .          |
| .            | .          | .          | ENST0000. | 11q21    | . | .          | .          |
| .            | frameshift | JAM3:NM_   | ENST0000. | 11q25    | . | Score=856. | .          |
| .            | frameshift | KDM5A:NM   | ENST0000. | 12p13.33 | . | .          | .          |
| .            | .          | .          | ENST0000. | 12p13.32 | . | .          | .          |
| .            | .          | .          | ENST0000. | 12p13.31 | . | .          | .          |
| .            | .          | .          | ENST0000. | 12p13.31 | . | .          | .          |
| .            | .          | .          | ENST0000. | 12p13.31 | . | .          | .          |
| .            | frameshift | CLECL1:N   | ENST0000. | 12p13.31 | . | .          | .          |
| NM_05816.    | .          | .          | ENST0000. | 12p13.2  | . | .          | .          |
| .            | .          | .          | ENST0000. | 12p11.23 | . | .          | Score=0.94 |
| .            | .          | .          | ENST0000. | 12p11.22 | . | .          | Score=0.94 |
| .            | unknown    | UNKNOWN    | ENST0000. | 12q12    | . | .          | .          |
| dist=1383;t. | .          | .          | ENST0000. | 12q12    | . | .          | .          |
| .            | .          | .          | ENST0000. | 12q13.12 | . | .          | .          |
| .            | .          | .          | ENST0000. | 12q13.12 | . | .          | .          |
| .            | .          | .          | ENST0000. | 12q13.12 | . | .          | .          |
| .            | .          | .          | ENST0000. | 12q13.12 | . | .          | .          |
| .            | frameshift | SCN8A:NM   | ENST0000. | 12q13.13 | . | Score=836. | .          |
| .            | .          | .          | ENST0000. | 12q13.13 | . | .          | .          |
| NM_01895.    | .          | .          | ENST0000. | 12q13.13 | . | .          | .          |
| .            | frameshift | TIMELESS   | ENST0000. | 12q13.3  | . | Score=866. | .          |
| .            | frameshift | MYO1A:NM   | ENST0000. | 12q13.3  | . | .          | .          |
| NM_00233.    | .          | .          | ENST0000. | 12q13.3  | . | .          | .          |
| .            | frameshift | MBD6:NM_   | ENST0000. | 12q13.3  | . | Score=879. | .          |
| .            | .          | .          | ENST0000. | 12q23.3  | . | .          | .          |
| .            | .          | .          | ENST0000. | 12q23.3  | . | .          | .          |
| .            | frameshift | DNAH10:N   | ENST0000. | 12q24.31 | . | .          | .          |
| .            | frameshift | WASF3:NM   | ENST0000. | 13q12.13 | . | .          | .          |
| .            | .          | .          | ENST0000. | 13q13.3  | . | .          | .          |
| .            | .          | .          | ENST0000. | 13q34    | . | .          | .          |
| .            | frameshift | SAMD4A:NM  | ENST0000. | 14q22.2  | . | .          | .          |
| .            | frameshift | KIAA0586:  | ENST0000. | 14q23.1  | . | .          | .          |
| .            | .          | .          | ENST0000. | 14q23.1  | . | .          | .          |
| .            | .          | .          | ENST0000. | 14q24.1  | . | .          | Score=0.94 |
| .            | frameshift | UNC79:NM   | ENST0000. | 14q32.12 | . | .          | .          |
| .            | .          | .          | ENST0000. | 14q32.2  | . | .          | .          |
| .            | .          | .          | ENST0000. | 14q32.33 | . | .          | .          |
| .            | frameshift | NIPA2:NM   | ENST0000. | 15q11.2  | . | .          | .          |
| .            | .          | .          | ENST0000. | 15q15.2  | . | .          | .          |
| .            | .          | .          | ENST0000. | 15q15.3  | . | .          | .          |
| .            | frameshift | TP53BP1:NM | ENST0000. | 15q15.3  | . | .          | .          |
| .            | frameshift | GALK2:NM   | ENST0000. | 15q21.2  | . | Score=807. | .          |

|              |            |           |           |          |            |
|--------------|------------|-----------|-----------|----------|------------|
| .            | .          | ENST000C. | 15q21.3   | .        | .          |
| NM_00128.    | .          | ENST000C. | 15q23     | .        | .          |
| .            | .          | ENST000C. | 15q24.1   | .        | .          |
| .            | .          | ENST000C. | 15q24.1   | .        | .          |
| .            | frameshift | ALPK3:NM  | ENST000C. | 15q25.3  | Score=872. |
| .            | frameshift | AGBL1:NM  | ENST000C. | 15q25.3  | .          |
| .            | .          | ENST000C. | 15q25.3   | .        | .          |
| .            | frameshift | KIF7:NM_1 | ENST000C. | 15q26.1  | Score=920. |
| .            | .          | ENST000C. | 15q26.1   | .        | .          |
| NM_17884.    | .          | ENST000C. | 16p13.3   | .        | .          |
| NM_03257.    | .          | ENST000C. | 16p13.3   | .        | .          |
| .            | frameshift | GLYR1:NM  | ENST000C. | 16p13.3  | Score=782. |
| .            | .          | ENST000C. | 16p13.13  | .        | .          |
| .            | .          | ENST000C. | 16p13.11  | .        | Score=0.91 |
| .            | .          | ENST000C. | 16p11.2   | .        | .          |
| .            | .          | ENST000C. | 16p11.2   | .        | .          |
| .            | .          | ENST000C. | 16q12.1   | .        | .          |
| .            | frameshift | CDH5:NM_  | ENST000C. | 16q21    | .          |
| .            | frameshift | KCTD19:N  | ENST000C. | 16q22.1  | Score=899. |
| .            | .          | ENST000C. | 16q22.1   | .        | .          |
| .            | frameshift | ZNF469:NI | ENST000C. | 16q24.2  | Score=800. |
| .            | .          | ENST000C. | 17p13.3   | .        | .          |
| NM_01522.    | .          | ENST000C. | 17p13.3   | .        | .          |
| .            | .          | ENST000C. | 17p13.1   | .        | .          |
| .            | frameshift | KCNAB3:N  | ENST000C. | 17p13.1  | Score=942. |
| .            | nonframes  | MYH10:NM  | ENST000C. | 17p13.1  | Score=826. |
| .            | .          | ENST000C. | 17q11.2   | .        | .          |
| .            | .          | ENST000C. | 17q12     | .        | .          |
| .            | frameshift | CDK12:NM  | ENST000C. | 17q12    | Score=922. |
| .            | .          | ENST000C. | 17q21.2   | .        | .          |
| .            | frameshift | AOC3:NM_  | ENST000C. | 17q21.31 | Score=0.94 |
| .            | frameshift | GPATCH8   | ENST000C. | 17q21.31 | .          |
| .            | .          | ENST000C. | 17q21.31  | .        | Score=968. |
| .            | .          | ENST000C. | 17q21.32  | .        | .          |
| NM_00114.    | .          | ENST000C. | 17q21.32  | .        | .          |
| .            | .          | ENST000C. | 17q21.32  | .        | .          |
| .            | frameshift | USP36:NM  | ENST000C. | 17q25.3  | .          |
| .            | .          | ENST000C. | 17q25.3   | .        | .          |
| dist=2490;(. | .          | ENST000C. | 17q25.3   | .        | .          |
| .            | .          | ENST000C. | 18p11.32  | .        | .          |
| .            | .          | ENST000C. | 18p11.21  | .        | .          |
| .            | .          | ENST000C. | 18p11.21  | .        | .          |
| .            | frameshift | NPC1:NM_  | ENST000C. | 18q11.2  | .          |
| .            | .          | ENST000C. | 18q11.2   | .        | .          |
| .            | .          | ENST000C. | 18q12.2   | .        | .          |
| .            | .          | ENST000C. | 18q21.1   | .        | .          |
| .            | nonframes  | SMAD7:NM  | ENST000C. | 18q21.1  | .          |
| .            | frameshift | ALPK2:NM  | ENST000C. | 18q21.32 | .          |
| .            | .          | ENST000C. | 19p13.3   | .        | .          |
| .            | frameshift | DAZAP1:N  | ENST000C. | 19p13.3  | Score=879. |
| .            | frameshift | ZFR2:NM_  | ENST000C. | 19p13.3  | .          |
| .            | .          | ENST000C. | 19p13.3   | .        | .          |
| .            | .          | ENST000C. | 19p13.3   | .        | .          |

|             |            |           |           |          |            |
|-------------|------------|-----------|-----------|----------|------------|
| .           | .          | ENST0000. | 19p13.3   | .        | .          |
| .           | .          | ENST0000. | 19p13.3   | .        | .          |
| .           | frameshift | PTPRS:NM  | ENST0000. | 19p13.3  | .          |
| .           | .          | ENST0000. | 19p13.3   | .        | .          |
| .           | frameshift | C3:NM_00  | ENST0000. | 19p13.3  | .          |
| .           | .          | ENST0000. | 19p13.2   | .        | .          |
| .           | .          | ENST0000. | 19p13.2   | .        | .          |
| .           | .          | ENST0000. | 19p13.11  | .        | .          |
| .           | frameshift | CRTC1:NM  | ENST0000. | 19p13.11 | .          |
| .           | .          | ENST0000. | 19q13.11  | .        | .          |
| .           | .          | ENST0000. | 19q13.11  | .        | .          |
| .           | .          | ENST0000. | 19q13.12  | .        | .          |
| .           | frameshift | KMT2B:NM  | ENST0000. | 19q13.12 | .          |
| .           | frameshift | ZNF382:NI | ENST0000. | 19q13.12 | .          |
| .           | .          | ENST0000. | 19q13.12  | .        | .          |
| .           | unknown    | UNKNOWI   | ENST0000. | 19q13.13 | Score=755. |
| dist=34840. | .          | ENST0000. | 19q13.31  | .        | .          |
| .           | frameshift | PHLDB3:N  | ENST0000. | 19q13.31 | .          |
| .           | frameshift | NKPD1:NM  | ENST0000. | 19q13.32 | .          |
| .           | frameshift | MARK4:NM  | ENST0000. | 19q13.32 | Score=755. |
| .           | .          | ENST0000. | 19q13.32  | .        | .          |
| NM_00459.   | .          | ENST0000. | 19q13.32  | .        | .          |
| .           | frameshift | PNMAL2:N  | ENST0000. | 19q13.32 | Score=766. |
| .           | frameshift | GLTSCR1:  | ENST0000. | 19q13.33 | .          |
| .           | frameshift | BAX:NM_C  | ENST0000. | 19q13.33 | Score=836. |
| .           | .          | ENST0000. | 19q13.33  | .        | .          |
| .           | .          | ENST0000. | 19q13.33  | .        | .          |
| .           | .          | ENST0000. | 19q13.41  | .        | .          |
| NM_00108.   | .          | ENST0000. | 19q13.42  | .        | .          |
| .           | .          | ENST0000. | 19q13.42  | .        | .          |
| .           | frameshift | BRSK1:NM  | ENST0000. | 19q13.42 | .          |
| .           | .          | ENST0000. | 19q13.43  | .        | .          |
| .           | .          | ENST0000. | 20p13     | .        | .          |
| .           | .          | ENST0000. | 20p13     | .        | .          |
| .           | .          | ENST0000. | 20p12.1   | .        | .          |
| .           | .          | ENST0000. | 20p12.1   | .        | .          |
| .           | frameshift | ASXL1:NM  | ENST0000. | 20q11.21 | Score=888. |
| .           | .          | ENST0000. | 20q11.22  | .        | .          |
| .           | .          | ENST0000. | 20q11.23  | .        | .          |
| NM_02247.   | .          | ENST0000. | 20q11.23  | .        | .          |
| .           | .          | ENST0000. | 20q13.12  | .        | .          |
| .           | frameshift | DDX27:NM  | ENST0000. | 20q13.13 | .          |
| .           | .          | ENST0000. | 20q13.33  | .        | .          |
| .           | .          | ENST0000. | 20q13.33  | .        | .          |
| dist=98028. | .          | ENST0000. | 21q21.1   | .        | .          |
| .           | frameshift | FTCD:NM_  | ENST0000. | 21q22.3  | .          |
| .           | frameshift | MCM3AP:†  | ENST0000. | 21q22.3  | Score=976. |
| .           | .          | ENST0000. | 22q11.21  | .        | Score=0.9  |
| .           | .          | ENST0000. | 22q11.23  | .        | Score=0.9  |
| .           | frameshift | MN1:NM_(  | ENST0000. | 22q12.1  | Score=869. |
| .           | .          | ENST0000. | 22q12.2   | .        | .          |
| NM_05290.   | .          | ENST0000. | 22q13.1   | .        | .          |
| .           | frameshift | CDC42EP   | ENST0000. | 22q13.1  | Score=888. |
| .           | .          | ENST0000. | 22q13.2   | .        | Score=0.9  |



|             |            |           |           |          |   |            |
|-------------|------------|-----------|-----------|----------|---|------------|
| .           | frameshift | GTSE1:NM  | ENST0000. | 22q13.31 | . | .          |
| .           | .          | .         | ENST0000. | 22q13.33 | . | .          |
| .           | frameshift | PPP2R3B:  | ENST0000. | Xp22.33  | . | Score=0.96 |
| .           | .          | .         | ENST0000. | Xp22.31  | . | .          |
| .           | .          | .         | ENST0000. | Xp22.12  | . | .          |
| .           | .          | .         | ENST0000. | Xp11.4   | . | .          |
| .           | .          | .         | ENST0000. | Xp11.23  | . | .          |
| .           | .          | .         | ENST0000. | Xp11.23  | . | .          |
| .           | .          | .         | ENST0000. | Xp11.23  | . | .          |
| .           | .          | .         | ENST0000. | Xp11.22  | . | .          |
| .           | frameshift | MAGEE2:NM | ENST0000. | Xq13.3   | . | .          |
| NM_00104.   | .          | .         | ENST0000. | Xq26.3   | . | .          |
| .           | frameshift | PLXNB3:NM | ENST0000. | Xq28     | . | .          |
| .           | nonframes  | FOXC1:NM  | ENST0000. | 6p25.3   | . | .          |
| NM_00120.   | .          | .         | ENST0000. | 11q13.5  | . | .          |
| .           | .          | .         | ENST0000. | 19p13.3  | . | .          |
| NM_00119.   | .          | .         | ENST0000. | 1p34.2   | . | .          |
| NM_00101.   | .          | .         | ENST0000. | 2q24.1   | . | .          |
| .           | frameshift | KCNH8:NM  | ENST0000. | 3p24.3   | . | .          |
| .           | .          | .         | ENST0000. | 13q14.13 | . | .          |
| .           | nonframes  | CCDC177:  | ENST0000. | 14q24.1  | . | .          |
| dist=76944. | .          | .         | ENST0000. | 15q11.2  | . | Score=0.96 |
| NM_00100.   | .          | .         | ENST0000. | 1p32.3   | . | .          |
| .           | .          | .         | ENST0000. | 2q14.2   | . | .          |
| .           | .          | .         | ENST0000. | 2q14.2   | . | .          |
| .           | nonframes  | RRAGD:NM  | ENST0000. | 6q15     | . | .          |
| .           | .          | .         | ENST0000. | 9q33.3   | . | .          |
| .           | nonframes  | NPTX1:NM  | ENST0000. | 17q25.3  | . | Score=699. |
| NM_00128.   | .          | .         | ENST0000. | 18q12.2  | . | .          |
| .           | frameshift | ZAK:NM_0  | ENST0000. | 2q31.1   | . | .          |
| NM_01695.   | .          | .         | .         | 4p15.2   | . | .          |
| .           | nonframes  | CYTH3:NM  | ENST0000. | 7p22.1   | . | .          |
| dist=NONE.  | .          | .         | ENST0000. | 11p15.5  | . | Score=0.96 |
| .           | frameshift | SALL2:NM  | ENST0000. | 14q11.2  | . | .          |
| .           | .          | .         | ENST0000. | 17p13.1  | . | .          |
| .           | frameshift | NBPF8:NM  | ENST0000. | 1q21.2   | . | Score=0.96 |
| .           | .          | .         | ENST0000. | 2q31.1   | . | .          |
| .           | frameshift | SYNJ2:NM  | ENST0000. | 6q25.3   | . | .          |
| .           | frameshift | POLE:NM_  | ENST0000. | 12q24.33 | . | .          |
| .           | nonframes  | TP53:NM_  | ENST0000. | 17p13.1  | . | .          |
| .           | nonframes  | TRPM4:NM  | ENST0000. | 19q13.33 | . | .          |
| .           | frameshift | SHANK1:NM | ENST0000. | 19q13.33 | . | Score=985. |
| NM_00607.   | .          | .         | ENST0000. | 22q12.3  | . | .          |
| .           | .          | .         | ENST0000. | 3q27.2   | . | .          |
| .           | nonframes  | UTP3:NM_  | ENST0000. | 4q13.3   | . | .          |
| .           | nonframes  | SKIDA1:NM | ENST0000. | 10p12.31 | . | .          |
| .           | frameshift | CHTF18:NM | ENST0000. | 16p13.3  | . | .          |
| .           | frameshift | HOXB6:NM  | ENST0000. | 17q21.32 | . | .          |
| NM_00128.   | .          | .         | ENST0000. | 19q13.12 | . | Score=926. |
| dist=NONE.  | .          | .         | .         | .        | . | .          |
| .           | .          | .         | ENST0000. | 20p12.1  | . | .          |
| .           | .          | .         | ENST0000. | 17p11.2  | . | .          |
| .           | .          | .         | ENST0000. | 1p34.2   | . | .          |
| .           | frameshift | SGCZ:NM_  | ENST0000. | 8p22     | . | .          |

|             |            |            |           |          |   |            |            |
|-------------|------------|------------|-----------|----------|---|------------|------------|
| .           | frameshift | ENTPD2:NM  | ENST0000. | 9q34.3   | . | .          | .          |
| .           | .          | .          | ENST0000. | 11q25    | . | .          | .          |
| .           | .          | .          | ENST0000. | 14q24.1  | . | .          | .          |
| NM_00565.   | .          | .          | ENST0000. | 22q13.2  | . | .          | .          |
| .           | .          | .          | ENST0000. | 2p24.1   | . | .          | .          |
| dist=15878. | .          | .          | ENST0000. | 5q11.2   | . | .          | .          |
| .           | .          | .          | ENST0000. | 9q34.11  | . | .          | .          |
| .           | nonframes  | DCHS1:NM   | ENST0000. | 11p15.4  | . | .          | .          |
| .           | .          | .          | ENST0000. | 12p13.31 | . | .          | .          |
| .           | .          | .          | ENST0000. | 13q32.3  | . | .          | .          |
| .           | frameshift | SPATA7:NM  | ENST0000. | 14q31.3  | . | .          | .          |
| NM_00175.   | .          | .          | ENST0000. | 16q22.1  | . | .          | .          |
| .           | .          | .          | ENST0000. | 17p12    | . | .          | .          |
| NM_00114.   | .          | .          | ENST0000. | 17q11.2  | . | .          | .          |
| .           | nonframes  | COL18A1:NM | ENST0000. | 21q22.3  | . | .          | .          |
| dist=10462. | .          | .          | ENST0000. | 22q11.1  | . | .          | .          |
| .           | .          | .          | ENST0000. | Xp22.2   | . | Score=911. | .          |
| .           | nonframes  | ZNF316:NM  | ENST0000. | 7p22.1   | . | .          | .          |
| .           | .          | .          | ENST0000. | 8q23.1   | . | .          | .          |
| .           | .          | .          | ENST0000. | 11q22.2  | . | .          | .          |
| NM_00103.   | .          | .          | ENST0000. | 16q22.1  | . | .          | Score=0.94 |
| NM_00481.   | .          | .          | ENST0000. | 19q13.32 | . | .          | .          |
| .           | frameshift | ZNF419:NM  | ENST0000. | 19q13.43 | . | .          | Score=0.94 |
| .           | .          | .          | ENST0000. | Xp11.23  | . | .          | Score=0.94 |
| .           | .          | .          | ENST0000. | Xq22.3   | . | .          | .          |
| .           | frameshift | DOCK3:NM   | ENST0000. | 3p21.2   | . | .          | .          |
| .           | frameshift | NFKBIZ:NM  | ENST0000. | 3q12.3   | . | .          | .          |
| .           | .          | .          | ENST0000. | 15q26.1  | . | .          | .          |

| Repeat    | avsnp150  | cosmic82 | clinvar_20 | gwasCatal | 1000g2015 | 1000g2015 | 1000g2015 | esp6500si |
|-----------|-----------|----------|------------|-----------|-----------|-----------|-----------|-----------|
|           |           | ID=COSM1 |            |           |           |           |           |           |
| Score=118 | rs6078884 |          |            |           |           |           |           |           |
|           | rs3773783 |          |            |           |           |           |           | 0.0068    |
| Score=239 |           |          |            |           |           |           |           |           |
| Score=344 | rs7821786 |          |            |           | 0.0039    | 0.001589  |           |           |
|           | rs9190283 |          |            |           |           |           |           |           |
| Score=561 | rs7640343 |          |            |           |           |           |           |           |
|           | rs5844903 |          |            |           | 0.1448    | 0.153754  |           |           |
|           |           | ID=COSN1 |            |           |           |           |           |           |
| Score=446 |           |          |            |           |           |           |           |           |
| Score=366 |           |          |            |           |           |           |           |           |
|           | rs7760984 |          |            |           |           |           |           |           |
|           | rs9376078 | ID=COSN2 |            |           |           |           |           |           |
|           | rs7790390 |          |            |           |           |           |           |           |
|           |           | ID=COSM1 |            |           |           |           |           |           |
|           | rs7712392 | ID=COSN5 |            |           |           |           |           | 0.0021    |
|           | rs7686883 |          |            |           |           |           |           |           |
|           | rs7700977 | ID=COSN2 |            |           |           |           |           | 0.0011    |
|           |           | ID=COSM1 |            |           |           |           |           |           |
|           |           | ID=COSM1 |            |           |           |           |           |           |
|           | rs7584166 | ID=COSM1 |            |           |           |           |           | 0.0015    |
|           | rs7537986 | ID=COSN1 |            |           |           |           |           |           |
|           | rs5395449 |          |            |           |           | 0.000599  |           | 0.0124    |
|           |           | ID=COSM2 |            |           |           |           |           |           |
|           | rs7594247 | ID=COSM1 |            |           |           |           |           | 0.0007    |
|           | rs7703770 |          |            |           |           |           |           |           |
| Score=390 | rs7968975 |          |            |           |           |           |           |           |

|            |            |           |   |   |         |          |          |   |
|------------|------------|-----------|---|---|---------|----------|----------|---|
| .          | .          | ID=COSMk. | . | . | .       | .        | .        | . |
| .          | rs7808912. | .         | . | . | .       | .        | .        | . |
| Score=625. | .          | .         | . | . | .       | .        | .        | . |
| .          | rs1997131  | ID=COSN1. | . | . | 0.005   | 0.001597 | .        | . |
| .          | .          | .         | . | . | .       | .        | .        | . |
| .          | rs7703599  | ID=COSMk. | . | . | .       | .        | .        | . |
| .          | rs7789371  | ID=COSMk. | . | . | .       | .        | 0.0042   | . |
| Score=121. | .          | .         | . | . | .       | .        | .        | . |
| .          | .          | ID=COSN2. | . | . | .       | .        | .        | . |
| .          | .          | .         | . | . | .       | .        | .        | . |
| .          | rs7647197  | ID=COSMk. | . | . | .       | .        | .        | . |
| .          | .          | .         | . | . | .       | .        | .        | . |
| .          | rs7456483  | ID=COSMk. | . | . | .       | .        | .        | . |
| .          | .          | .         | . | . | .       | .        | .        | . |
| .          | .          | ID=COSN2. | . | . | .       | .        | .        | . |
| .          | rs7470964. | .         | . | . | .       | .        | .        | . |
| .          | .          | .         | . | . | .       | .        | .        | . |
| .          | .          | ID=COSMk. | . | . | .       | .        | .        | . |
| .          | .          | .         | . | . | .       | .        | .        | . |
| .          | .          | ID=COSMk. | . | . | .       | .        | .        | . |
| .          | .          | .         | . | . | .       | .        | .        | . |
| .          | .          | .         | . | . | .       | .        | .        | . |
| .          | .          | ID=COSMk. | . | . | .       | .        | .        | . |
| .          | rs5440185  | ID=COSN2. | . | . | 0.00619 | 0.0068   | .        | . |
| .          | .          | .         | . | . | .       | .        | .        | . |
| .          | .          | ID=COSMk. | . | . | .       | .        | .        | . |
| .          | rs9042896. | .         | . | . | .       | .        | .        | . |
| .          | rs7608755  | ID=COSN1. | . | . | .       | .        | .        | . |
| .          | .          | .         | . | . | .       | .        | .        | . |
| .          | .          | .         | . | . | .       | .        | .        | . |
| .          | rs7647092  | ID=COSMk. | . | . | .       | .        | .        | . |
| .          | .          | .         | . | . | .       | .        | .        | . |
| .          | .          | ID=COSMk. | . | . | .       | .        | .        | . |
| .          | .          | .         | . | . | .       | .        | .        | . |
| .          | rs7755820. | .         | . | . | .       | .        | .        | . |
| .          | .          | .         | . | . | .       | .        | .        | . |
| .          | .          | .         | . | . | .       | .        | .        | . |
| .          | .          | ID=COSN1. | . | . | .       | .        | .        | . |
| .          | .          | .         | . | . | .       | .        | .        | . |
| .          | rs7704742. | .         | . | . | .       | .        | 8.00E-05 | . |
| .          | rs7480610. | .         | . | . | .       | .        | .        | . |
| .          | rs7646973  | ID=COSN2. | . | . | .       | .        | .        | . |
| .          | rs9281864. | .         | . | . | .       | .        | .        | . |
| .          | .          | .         | . | . | .       | .        | .        | . |
| .          | rs7525252. | .         | . | . | .       | .        | .        | . |
| .          | .          | .         | . | . | .       | .        | .        | . |
| .          | .          | .         | . | . | .       | .        | .        | . |
| .          | .          | ID=COSN2. | . | . | .       | .        | .        | . |

|           |                    |  |  |       |          |          |
|-----------|--------------------|--|--|-------|----------|----------|
| Score=234 | rs7641185 ID=COSM' |  |  |       |          | 0.0018   |
|           | rs7639462          |  |  |       |          |          |
|           | ID=COSM'           |  |  |       |          |          |
|           | rs7466549 ID=COSM' |  |  |       |          | 0.0062   |
|           | rs7717298          |  |  |       |          |          |
|           | rs7625018 ID=COSN2 |  |  |       |          |          |
|           | rs7658478          |  |  |       |          |          |
|           | rs7778584          |  |  |       |          |          |
|           | rs7693384 ID=COSM' |  |  |       |          |          |
|           | rs7768326          |  |  |       |          |          |
|           | rs3743843          |  |  | 0.003 | 0.000599 |          |
|           | rs7666007          |  |  |       |          |          |
|           | rs7805014          |  |  |       |          |          |
|           | rs7489955 ID=COSN2 |  |  |       |          | 0.0108   |
|           | rs7612855          |  |  |       |          |          |
|           | rs7600208 ID=COSM' |  |  |       |          |          |
|           | ID=COSM'           |  |  |       |          |          |
|           | ID=COSN1           |  |  |       |          |          |
|           | rs7792033          |  |  |       |          |          |
|           | rs7668254 ID=COSM' |  |  |       |          |          |
|           | ID=COSM'           |  |  |       |          |          |
|           | rs1490463          |  |  |       |          | 8.00E-05 |
|           | ID=COSM'           |  |  |       |          |          |
|           | rs7570813          |  |  |       |          |          |
|           | rs7468588 ID=COSM' |  |  |       |          |          |
| Score=321 | rs1443745          |  |  |       |          |          |
|           | rs7542333 ID=COSM' |  |  |       |          |          |
|           | rs3701666 ID=COSM' |  |  |       |          |          |
|           | rs7470634 ID=COSM' |  |  |       |          |          |
|           | rs7819467          |  |  |       |          |          |
| Score=217 | rs5592025          |  |  | 0.004 | 0.000799 |          |





|   |                                |   |   |          |          |        |
|---|--------------------------------|---|---|----------|----------|--------|
| . | rs5635626 ID=COSN2.            | . | . | 0.001    | 0.000799 | .      |
| . | rs7515595 .                    | . | . | .        | .        | .      |
| . | rs5561116 ID=COSN1.            | . | . | .        | 0.000799 | .      |
| . | .                              | . | . | .        | .        | .      |
| . | rs7643461 ID=COSM2.            | . | . | .        | .        | .      |
| . | .                              | . | . | .        | .        | .      |
| . | ID=COSM2.                      | . | . | .        | .        | .      |
| . | .                              | . | . | .        | .        | .      |
| . | rs7781350 .                    | . | . | .        | .        | 0.0063 |
| . | rs7809656 .                    | . | . | .        | .        | .      |
| . | rs7491504 ID=COSM2.            | . | . | .        | .        | 0.0057 |
| . | Score=119.                     | . | . | .        | .        | .      |
| . | .                              | . | . | .        | .        | .      |
| . | .                              | . | . | .        | .        | .      |
| . | rs7570296 .                    | . | . | .        | .        | .      |
| . | .                              | . | . | .        | .        | .      |
| . | rs7817135 ID=COSM2.            | . | . | .        | .        | .      |
| . | rs7679025 ID=COSM2.            | . | . | .        | .        | .      |
| . | .                              | . | . | .        | .        | .      |
| . | .                              | . | . | .        | .        | .      |
| . | .                              | . | . | .        | .        | .      |
| . | .                              | . | . | .        | .        | 0.0045 |
| . | rs7574964 ID=COSM2.            | . | . | .        | .        | .      |
| . | ID=COSM2.                      | . | . | .        | .        | .      |
| . | rs5285990 ID=COSN2.            | . | . | 0.002796 | .        | 0.002  |
| . | Score=276.                     | . | . | .        | .        | .      |
| . | ID=COSM2.                      | . | . | .        | .        | .      |
| . | .                              | . | . | .        | .        | .      |
| . | .                              | . | . | .        | .        | .      |
| . | .                              | . | . | .        | .        | .      |
| . | .                              | . | . | .        | .        | .      |
| . | rs1380173 .                    | . | . | 0.026558 | .        | 0.0226 |
| . | ID=COSN1.                      | . | . | .        | .        | .      |
| . | .                              | . | . | .        | .        | .      |
| . | rs7634794 .                    | . | . | .        | .        | .      |
| . | .                              | . | . | .        | .        | .      |
| . | rs7487058 .                    | . | . | .        | .        | .      |
| . | rs1429731 ID=COSN1Likely beni. | . | . | .        | .        | .      |
| . | rs7500268 .                    | . | . | .        | .        | .      |
| . | .                              | . | . | .        | .        | .      |
| . | .                              | . | . | .        | .        | .      |
| . | rs7661354 .                    | . | . | .        | .        | 0.0009 |
| . | .                              | . | . | .        | .        | .      |
| . | rs5710814 .                    | . | . | .        | .        | 0.002  |
| . | Score=235 rs1019291 .          | . | . | .        | .        | .      |
| . | rs7630535 ID=COSM2.            | . | . | .        | .        | .      |
| . | Score=346.                     | . | . | .        | .        | .      |
| . | Score=23;l.                    | . | . | .        | .        | .      |
| . | rs7644591 ID=COSM2.            | . | . | .        | .        | .      |
| . | .                              | . | . | .        | .        | .      |
| . | Score=856.                     | . | . | .        | .        | .      |











|          |        |   |   |   |   |            |          |
|----------|--------|---|---|---|---|------------|----------|
| 0.0007   | 0.     | . | . | . | . | .          | .        |
| .        | .      | . | . | . | . | .          | .        |
| .        | .      | . | . | . | . | -0.366243, | 0.001131 |
| .        | .      | . | . | . | . | -0.344064, | .        |
| 2.47E-05 | 0.     | . | . | . | . | .          | .        |
| 0.0033   | 0.0002 | . | . | . | . | 2.599557,  | 1.       |
| .        | .      | . | . | . | . | .          | .        |
| .        | .      | . | . | . | . | .          | .        |
| 3.31E-05 | 0.     | . | . | . | . | .          | .        |
| .        | .      | . | . | . | . | .          | .        |
| .        | .      | . | . | . | . | .          | .        |
| 2.50E-05 | 0.     | . | . | . | . | .          | 0.000194 |
| .        | .      | . | . | . | . | .          | .        |
| .        | .      | . | . | . | . | .          | .        |
| 0.0003   | 0.     | . | . | . | . | .          | .        |
| .        | .      | . | . | . | . | .          | .        |
| .        | .      | . | . | . | . | .          | .        |
| .        | .      | . | . | . | . | -0.745937, | .        |
| .        | .      | . | . | . | . | .          | .        |
| .        | .      | . | . | . | . | .          | .        |
| .        | .      | . | . | . | . | .          | .        |
| 0.0019   | 0.0002 | . | . | . | . | -1.033226, | .        |
| .        | .      | . | . | . | . | .          | .        |
| .        | .      | . | . | . | . | .          | .        |
| 3.49E-05 | 0.     | . | . | . | . | .          | .        |
| .        | .      | . | . | . | . | .          | .        |
| .        | .      | . | . | . | . | .          | .        |
| 4.13E-05 | 0.     | . | . | . | . | 2.045653,  | 1.       |
| .        | .      | . | . | . | . | .          | .        |
| .        | .      | . | . | . | . | .          | .        |
| .        | .      | . | . | . | . | .          | .        |
| 3.30E-05 | 0.     | . | . | . | . | .          | .        |
| .        | .      | . | . | . | . | .          | .        |
| .        | .      | . | . | . | . | .          | 0.045347 |
| .        | .      | . | . | . | . | .          | .        |
| .        | .      | . | . | . | . | .          | .        |
| 4.14E-05 | 0.     | . | . | . | . | 6.272893,  | 3.       |
| 0.0013   | 0.     | . | . | . | . | .          | 0.000518 |
| 7.43E-05 | 0.     | . | . | . | . | 0.215872,  | 5.       |
| .        | .      | . | . | . | . | .          | .        |
| .        | .      | . | . | . | . | .          | .        |
| 6.67E-05 | 0.     | . | . | . | . | .          | .        |
| .        | .      | . | . | . | . | .          | .        |
| .        | .      | . | . | . | . | .          | .        |
| .        | .      | . | . | . | . | .          | .        |

|          |        |  |  |  |  |                     |
|----------|--------|--|--|--|--|---------------------|
| 0.0002   | 0.0001 |  |  |  |  | 3.925528,1.         |
| 3.31E-05 | 0      |  |  |  |  |                     |
|          |        |  |  |  |  |                     |
|          |        |  |  |  |  |                     |
| 0.0003   | 0.0003 |  |  |  |  | 12.104388.          |
|          |        |  |  |  |  | 0.699566,7.         |
|          |        |  |  |  |  |                     |
|          |        |  |  |  |  |                     |
| 2.54E-05 | 0      |  |  |  |  |                     |
| 0.0003   | 0.0002 |  |  |  |  |                     |
|          |        |  |  |  |  |                     |
|          |        |  |  |  |  | 0.000195            |
| 8.29E-06 | 0      |  |  |  |  |                     |
| 0.0018   | 0.0003 |  |  |  |  | 3.668062,1.         |
|          |        |  |  |  |  |                     |
| 0.0013   | 0.0003 |  |  |  |  | -0.354890,.         |
|          |        |  |  |  |  | -0.012894, 0.001761 |
|          |        |  |  |  |  |                     |
| 3.91E-05 | 0.0005 |  |  |  |  |                     |
| 8.60E-06 | 0      |  |  |  |  |                     |
| 0.0132   | 0.0002 |  |  |  |  | 0.779711,£.         |
| 8.55E-06 | 0      |  |  |  |  |                     |
| 0.0014   | 0.0002 |  |  |  |  | 2.174337,1.         |
|          |        |  |  |  |  |                     |
|          |        |  |  |  |  |                     |
|          |        |  |  |  |  |                     |
| 0.0003   | 0      |  |  |  |  |                     |
| 1.67E-05 | 0      |  |  |  |  |                     |
|          |        |  |  |  |  |                     |
|          |        |  |  |  |  |                     |
|          |        |  |  |  |  | 4.835186,2.         |
|          |        |  |  |  |  | 0.253508,£ 0.028386 |
|          |        |  |  |  |  |                     |
|          |        |  |  |  |  |                     |
| 0.0027   | 0      |  |  |  |  |                     |
| 2.51E-05 | 0      |  |  |  |  |                     |
|          |        |  |  |  |  |                     |
|          |        |  |  |  |  |                     |
|          |        |  |  |  |  | -0.792134, 0.010551 |
|          |        |  |  |  |  | 0.066003,£.         |
|          |        |  |  |  |  |                     |
|          |        |  |  |  |  |                     |
| 0.0011   | 0      |  |  |  |  | 7.541577,£.         |
| 0.0002   | 0      |  |  |  |  | 0.414848,£.         |
|          |        |  |  |  |  |                     |
| 7.45E-05 | 0      |  |  |  |  |                     |
|          |        |  |  |  |  |                     |
|          |        |  |  |  |  |                     |
| 8.41E-06 | 0      |  |  |  |  |                     |
|          |        |  |  |  |  |                     |
|          |        |  |  |  |  |                     |
|          |        |  |  |  |  |                     |
| 0.0006   | 0.0026 |  |  |  |  | -0.337970, 0.002138 |

|          |        |  |  |  |  |             |          |
|----------|--------|--|--|--|--|-------------|----------|
| 0.0075   | 0.0013 |  |  |  |  | 1.449740,1  | 0.000278 |
| 0.0042   | 0.0001 |  |  |  |  | -0.171168,  |          |
| 1.66E-05 | 0      |  |  |  |  |             |          |
| 0.0012   | 0      |  |  |  |  | 0.332589,£  | 0.001942 |
| 0.0002   |        |  |  |  |  | -1.012315,  |          |
|          |        |  |  |  |  | 3.590050,1. |          |
| 0.0006   | 0      |  |  |  |  |             |          |
| 8.28E-06 | 0      |  |  |  |  |             |          |
|          |        |  |  |  |  | 0.781695,£  | 0.000194 |
| 0.0003   | 0      |  |  |  |  |             |          |
| 8.31E-06 | 0      |  |  |  |  |             |          |
| 0.0005   | 0.0004 |  |  |  |  |             |          |
|          |        |  |  |  |  |             |          |
|          |        |  |  |  |  | 0.848277,£. |          |
| 0.0384   | 0.1569 |  |  |  |  | -0.953411,  | 0.000197 |
| 9.89E-05 | 0.001  |  |  |  |  | 4.370603,2  | 0.000705 |
|          |        |  |  |  |  | 2.454346,1. |          |
| 4.37E-05 | 0      |  |  |  |  |             |          |
|          |        |  |  |  |  | -0.201835,  | 0.005479 |
|          |        |  |  |  |  |             |          |
| 1.38E-05 | 0      |  |  |  |  |             | 0.000389 |
|          |        |  |  |  |  |             |          |
| 9.35E-05 | 0      |  |  |  |  |             |          |
|          |        |  |  |  |  |             | 0.001391 |
| 0.0002   | 0.0005 |  |  |  |  | -0.750302,  | 0.001206 |
| 0.0025   | 0.0001 |  |  |  |  | 0.948278,£. |          |
| 8.28E-06 |        |  |  |  |  |             |          |
| 0.0031   | 0.0005 |  |  |  |  | 5.924892,£. |          |
|          |        |  |  |  |  |             |          |
| 1.66E-05 | 0.0001 |  |  |  |  |             | 0.000389 |
| 8.28E-06 | 0      |  |  |  |  | -0.266141,  |          |
| 2.62E-05 | 0      |  |  |  |  |             |          |
|          |        |  |  |  |  |             |          |
| 0.0046   | 0.0122 |  |  |  |  | 0.334116,£  | 0.00529  |
|          |        |  |  |  |  |             |          |
|          |        |  |  |  |  | 1.247081,1. |          |
| 0.0006   | 0.0004 |  |  |  |  | 1.443171,1. |          |
|          |        |  |  |  |  | 1.184019,£. |          |







|          |        |  |  |  |  |                     |
|----------|--------|--|--|--|--|---------------------|
| 4.39E-05 | 0      |  |  |  |  | 0.000194            |
| 0.0002   | 0.0001 |  |  |  |  |                     |
| 0.0002   | 0      |  |  |  |  | 6.184515,ξ          |
| 0.0004   | 0.0004 |  |  |  |  | 0.091208,λ          |
| 3.27E-05 | 0      |  |  |  |  |                     |
| 0.0088   | 0.0091 |  |  |  |  | -0.310612,η         |
| 0.0002   | 0.0003 |  |  |  |  | 2.258493,1          |
| 0.0016   | 0.0001 |  |  |  |  | 1.111180,ξ          |
| 0.0003   | 0.0002 |  |  |  |  | -0.232107,η         |
| 0.0015   | 0.0005 |  |  |  |  |                     |
| 0.0003   | 0.0005 |  |  |  |  |                     |
| 5.83E-05 | 0      |  |  |  |  |                     |
| 0.0016   | 0.0005 |  |  |  |  | 4.966242,ξ          |
| 0.0003   | 0.0001 |  |  |  |  | -1.576300,η         |
| 0.0002   | 0      |  |  |  |  |                     |
| 0.0003   | 0.0001 |  |  |  |  |                     |
| 0.0004   | 0.0006 |  |  |  |  | 4.399397,ξ          |
|          |        |  |  |  |  | -0.789274,η         |
| 8.36E-06 | 0      |  |  |  |  | -1.711714, 0.003326 |
| 0.0002   | 0.0002 |  |  |  |  |                     |
| 0.0166   | 0.0104 |  |  |  |  | 0.846469,ξ 0.003911 |
| 0.0002   | 0.0009 |  |  |  |  | 0.118246,λ          |

8.48E-06 0 . . . . .  
1.295933,1.  
3.49E-05 0 . . . . .  
-1.137313, .  
0.0059 0.0016 . . . . .  
-0.278162, .  
0.0009 0 . . . . .  
-0.002064, .  
0.000194  
0.0014 0 . . . . .  
6.926590,£ .  
9.62E-05 0 . . . . .  
0.044422,£ .  
0.000451  
0.0131 0.0007 . . . . .  
-0.967556, 0.002163  
-0.708287, 0.180922  
-0.621617, .  
2.489362,1.  
2.267836,1 0.039913  
0.0201 0.0152 . . . . .  
2.539731,1.  
0.0006 0 . . . . .  
0.000235  
0.0159 0.0034 . . . . .  
1.032582,£ 0.00366  
8.54E-06 0.0001 . . . . .



| NovoDb_V | INFO      | FORMAT              | ACa01N     | ACa01T  | Ori_REF | Ori_ALT | shared_ho | shared_he |
|----------|-----------|---------------------|------------|---------|---------|---------|-----------|-----------|
| .        | IC=2;IHP= | DP:DP2:T/24:24:24,2 | 47:47:23,2 | AC      | A       | A       | 0         | 0         |
| .        | IC=8;IHP= | DP:DP2:T/62:62:54,5 | 114:114:6  | G       | GT      | GT      | 0         | 0         |
| .        | IC=0;IHP= | DP:DP2:T/74:74:73,7 | 236:236:2  | TTGGAG  | T       | T       | 0         | 0         |
| .        | IC=1;IHP= | DP:DP2:T/51:51:51,5 | 101:101:6  | GTTT    | G       | G       | 0         | 0         |
| .        | IC=9;IHP= | DP:DP2:T/77:77:75,7 | 154:154:9  | T       | TC      | TC      | 0         | 0         |
| .        | IC=0;IHP= | DP:DP2:T/96:96:94,9 | 334:334:2  | AT      | A       | A       | 0         | 0         |
| .        | IC=1;IHP= | DP:DP2:T/93:93:92,9 | 166:166:1  | CAGA    | C       | C       | 0         | 0         |
| .        | IC=5;IHP= | DP:DP2:T/145:145:1  | 576:576:2  | T       | TC      | TC      | 0         | 0         |
| .        | IC=1;IHP= | DP:DP2:T/106:106:1  | 234:234:1  | C       | CAG     | CAG     | 0         | 0         |
| .        | IC=6;IHP= | DP:DP2:T/51:51:48,4 | 116:116:8  | T       | TAGAC   | TAGAC   | 0         | 0         |
| .        | IC=0;IHP= | DP:DP2:T/107:107:11 | 245:245:1  | ACACAGC | A       | A       | 0         | 0         |
| .        | IC=9;IHP= | DP:DP2:T/38:38:31,3 | 72:72:32,3 | G       | GT      | GT      | 0         | 0         |
| .        | IC=1;IHP= | DP:DP2:T/70:70:64,6 | 176:176:14 | T       | TTGGGC  | TTGGGC  | 0         | 0         |
| .        | IC=0;IHP= | DP:DP2:T/78:78:74,7 | 205:205:1  | GTGTGTG | G       | G       | 0         | 0         |
| 0.147788 | IC=2;IHP= | DP:DP2:T/12:12:12,1 | 29:29:0,0  | 2TC     | T       | T       | 0         | 0         |
| .        | IC=0;IHP= | DP:DP2:T/97:97:95,9 | 152:152:1  | GGGGATG | G       | G       | 0         | 0         |
| .        | IC=2;IHP= | DP:DP2:T/79:79:76,7 | 167:167:11 | CG      | C       | C       | 0         | 0         |
| .        | IC=0;IHP= | DP:DP2:T/65:65:61,6 | 254:254:1  | CGT     | C       | C       | 0         | 0         |
| .        | IC=4;IHP= | DP:DP2:T/41:41:41,4 | 83:83:53,5 | GC      | G       | G       | 0         | 0         |
| .        | IC=0;IHP= | DP:DP2:T/83:83:83,9 | 172:172:1  | CCTCTTT | C       | C       | 0         | 0         |
| .        | IC=1;IHP= | DP:DP2:T/69:69:68,6 | 144:144:12 | C       | CTCTCTC | CTCTCTC | 0         | 0         |
| .        | IC=2;IHP= | DP:DP2:T/70:70:69,6 | 177:177:14 | CTG     | C       | C       | 0         | 0         |
| .        | IC=5;IHP= | DP:DP2:T/118:118:11 | 220:220:1  | AC      | A       | A       | 0         | 0         |
| .        | IC=7;IHP= | DP:DP2:T/152:152:14 | 304:304:24 | TC      | T       | T       | 0         | 0         |
| .        | IC=4;IHP= | DP:DP2:T/67:67:68,6 | 194:194:1  | AC      | A       | A       | 0         | 0         |
| .        | IC=8;IHP= | DP:DP2:T/103:103:1  | 193:193:1  | T       | TG      | TG      | 0         | 0         |
| .        | IC=5;IHP= | DP:DP2:T/42:42:42,4 | 77:77:56,5 | AC      | A       | A       | 0         | 0         |
| .        | IC=5;IHP= | DP:DP2:T/89:89:82,8 | 173:173:12 | CG      | C       | C       | 0         | 0         |
| .        | IC=6;IHP= | DP:DP2:T/86:86:83,8 | 209:209:1  | TG      | T       | T       | 0         | 0         |
| .        | IC=0;IHP= | DP:DP2:T/165:165:1  | 317:317:2  | CA      | C       | C       | 0         | 0         |
| .        | IC=8;IHP= | DP:DP2:T/105:105:9  | 191:191:1  | CA      | AC      | AC      | 0         | 0         |
| .        | IC=7;IHP= | DP:DP2:T/50:50:50,5 | 85:85:64,6 | C       | CT      | CT      | 0         | 0         |
| .        | IC=7;IHP= | DP:DP2:T/24:24:24,2 | 53:53:35,3 | GA      | G       | G       | 0         | 0         |
| .        | IC=8;IHP= | DP:DP2:T/108:108:1  | 203:203:1  | T       | TG      | TG      | 0         | 0         |
| .        | IC=4;IHP= | DP:DP2:T/56:56:56,5 | 84:84:56,5 | CT      | C       | C       | 0         | 0         |
| .        | IC=6;IHP= | DP:DP2:T/90:90:88,8 | 153:153:11 | GT      | G       | G       | 0         | 0         |
| .        | IC=4;IHP= | DP:DP2:T/60:60:60,6 | 137:137:1  | AG      | A       | A       | 0         | 0         |
| .        | IC=5;IHP= | DP:DP2:T/51:51:49,4 | 68:68:52,5 | TG      | T       | T       | 0         | 0         |
| .        | IC=6;IHP= | DP:DP2:T/94:94:91,9 | 237:237:1  | GT      | G       | G       | 0         | 0         |
| .        | IC=4;IHP= | DP:DP2:T/93:93:92,9 | 198:198:1  | TA      | T       | T       | 0         | 0         |
| .        | IC=7;IHP= | DP:DP2:T/63:63:57,5 | 106:106:7  | GA      | G       | G       | 0         | 0         |
| .        | IC=2;IHP= | DP:DP2:T/58:58:59,5 | 108:108:84 | CAG     | C       | C       | 0         | 0         |
| .        | IC=4;IHP= | DP:DP2:T/71:71:68,6 | 114:114:87 | TC      | T       | T       | 0         | 0         |
| .        | IC=9;IHP= | DP:DP2:T/59:59:59,5 | 97:97:72,7 | G       | GA      | GA      | 0         | 0         |
| .        | IC=6;IHP= | DP:DP2:T/56:56:52,5 | 105:105:82 | GA      | G       | G       | 0         | 0         |
| .        | IC=7;IHP= | DP:DP2:T/52:52:51,5 | 92:92:65,6 | AT      | A       | A       | 0         | 0         |
| .        | IC=5;IHP= | DP:DP2:T/217:217:21 | 458:458:3  | AC      | A       | A       | 0         | 0         |
| .        | IC=7;IHP= | DP:DP2:T/73:73:70,7 | 133:133:1  | TA      | T       | T       | 0         | 0         |
| .        | IC=7;IHP= | DP:DP2:T/59:59:55,5 | 86:86:61,6 | TA      | T       | T       | 0         | 0         |
| .        | IC=5;IHP= | DP:DP2:T/52:52:48,5 | 79:79:57,5 | CG      | C       | C       | 0         | 0         |
| 0.000883 | IC=5;IHP= | DP:DP2:T/31:31:32,3 | 73:73:49,4 | CTG     | C       | C       | 0         | 0         |

|          |                                                 |    |   |   |
|----------|-------------------------------------------------|----|---|---|
| .        | IC=8;IHP= DP:DP2:T/50:50:49,4 79:79:62,6 C      | CA | 0 | 0 |
| .        | IC=6;IHP= DP:DP2:T/72:72:68,6 114:114:87AT      | A  | 0 | 0 |
| .        | IC=3;IHP= DP:DP2:T/41:41:41,4 54:54:34,3 TA     | T  | 0 | 0 |
| 0.001416 | IC=7;IHP= DP:DP2:T/52:52:49,4 85:85:61,6 CA     | C  | 0 | 0 |
| .        | IC=4;IHP= DP:DP2:T/25:25:25,2 48:48:30,3 GA     | G  | 0 | 0 |
| .        | IC=9;IHP= DP:DP2:T/40:40:38,3 61:61:43,4 A      | AT | 0 | 0 |
| .        | IC=9;IHP= DP:DP2:T/131:131:12 324:324:24 G      | GC | 0 | 0 |
| .        | IC=7;IHP= DP:DP2:T/71:71:67,6 101:101:77 G      | GT | 0 | 0 |
| .        | IC=7;IHP= DP:DP2:T/47:47:47,4 73:73:50,5 TA     | T  | 0 | 0 |
| .        | IC=5;IHP= DP:DP2:T/55:55:53,5 108:108:82 CG     | C  | 0 | 0 |
| .        | IC=7;IHP= DP:DP2:T/103:103:98 125:125:7C TA     | T  | 0 | 0 |
| .        | IC=4;IHP= DP:DP2:T/97:97:95,9 182:182:14 AG     | A  | 0 | 0 |
| .        | IC=7;IHP= DP:DP2:T/109:109:1C 187:187:14 A      | AT | 0 | 0 |
| .        | IC=8;IHP= DP:DP2:T/70:70:64,6 136:136:1C T      | TG | 0 | 0 |
| .        | IC=5;IHP= DP:DP2:T/66:66:63,6 110:110:8C CT     | C  | 0 | 0 |
| .        | IC=7;IHP= DP:DP2:T/58:58:55,5 108:108:88 AT     | A  | 0 | 0 |
| .        | IC=7;IHP= DP:DP2:T/86:86:86,8 131:131:1C CT     | C  | 0 | 0 |
| .        | IC=4;IHP= DP:DP2:T/73:73:71,7 145:145:11 AT     | A  | 0 | 0 |
| .        | IC=6;IHP= DP:DP2:T/51:51:49,4 104:104:78 A      | AT | 0 | 0 |
| .        | IC=6;IHP= DP:DP2:T/72:72:67,6 105:105:78 CA     | C  | 0 | 0 |
| .        | IC=9;IHP= DP:DP2:T/59:59:59,5 118:118:88 T      | TA | 0 | 0 |
| .        | IC=6;IHP= DP:DP2:T/62:62:60,6 111:111:81 AC     | A  | 0 | 0 |
| .        | IC=0;IHP= DP:DP2:T/106:106:1C 152:152:18 AG     | A  | 0 | 0 |
| .        | IC=4;IHP= DP:DP2:T/96:96:92,9 137:137:1C GA     | G  | 0 | 0 |
| .        | IC=3;IHP= DP:DP2:T/67:67:67,6 140:140:11 TA     | T  | 0 | 0 |
| .        | IC=4;IHP= DP:DP2:T/136:136:18 304:304:28 TG     | T  | 0 | 0 |
| .        | IC=8;IHP= DP:DP2:T/181:181:17 310:310:28 A      | AC | 0 | 0 |
| .        | IC=6;IHP= DP:DP2:T/119:119:11 176:176:14 CT     | C  | 0 | 0 |
| .        | IC=5;IHP= DP:DP2:T/71:71:66,6 120:120:98 AT     | A  | 0 | 0 |
| .        | IC=7;IHP= DP:DP2:T/39:39:35,3 96:96:65,6 C      | CT | 0 | 0 |
| .        | IC=7;IHP= DP:DP2:T/49:49:44,4 66:66:51,5 TA     | T  | 0 | 0 |
| .        | IC=6;IHP= DP:DP2:T/101:101:97 131:131:1C GAA    | G  | 0 | 0 |
| .        | IC=1;IHP= DP:DP2:T/102:102:1C 225:225:18 TGAG   | T  | 0 | 0 |
| .        | IC=8;IHP= DP:DP2:T/90:90:88,8 174:174:18 A      | AG | 0 | 0 |
| .        | IC=3;IHP= DP:DP2:T/79:79:77,7 122:122:97 CA     | C  | 0 | 0 |
| .        | IC=6;IHP= DP:DP2:T/251:251:24 394:394:32 CG     | C  | 0 | 0 |
| .        | IC=6;IHP= DP:DP2:T/79:79:75,7 158:158:12 CT     | C  | 0 | 0 |
| .        | IC=0;IHP= DP:DP2:T/35:35:35,3 78:78:52,5 AAG    | A  | 0 | 0 |
| .        | IC=7;IHP= DP:DP2:T/122:122:11 214:214:17 T      | TG | 0 | 0 |
| .        | IC=5;IHP= DP:DP2:T/68:68:68,6 81:81:64,6 GA     | G  | 0 | 0 |
| .        | IC=5;IHP= DP:DP2:T/58:58:57,5 125:125:97 T      | TC | 0 | 0 |
| .        | IC=0;IHP= DP:DP2:T/38:38:37,3 92:92:70,7 CTTCT  | C  | 0 | 0 |
| .        | IC=9;IHP= DP:DP2:T/68:68:63,6 98:98:76,7 A      | AT | 0 | 0 |
| .        | IC=6;IHP= DP:DP2:T/183:183:17 449:449:38 TG     | T  | 0 | 0 |
| .        | IC=6;IHP= DP:DP2:T/105:105:1C 177:177:18 G      | GC | 0 | 0 |
| .        | IC=0;IHP= DP:DP2:T/91:91:91,9 227:227:18 TTAAC  | T  | 0 | 0 |
| 0.00088  | IC=2;IHP= DP:DP2:T/166:166:17 280:280:21 GAGA   | G  | 0 | 0 |
| .        | IC=6;IHP= DP:DP2:T/79:79:79,7 157:157:18 AT     | A  | 0 | 0 |
| .        | IC=5;IHP= DP:DP2:T/77:77:69,7 125:125:98 GA     | G  | 0 | 0 |
| .        | IC=1;IHP= DP:DP2:T/148:148:14 282:282:28 AAGG   | A  | 0 | 0 |
| .        | IC=2;IHP= DP:DP2:T/65:65:69,6 141:141:12 AAAAAG | A  | 0 | 0 |
| .        | IC=4;IHP= DP:DP2:T/207:207:2C 405:405:38 TC     | T  | 0 | 0 |
| .        | IC=9;IHP= DP:DP2:T/46:46:44,4 67:67:46,4 C      | CT | 0 | 0 |
| .        | IC=6;IHP= DP:DP2:T/55:55:52,5 104:104:78 CG     | C  | 0 | 0 |

|          |                                              |      |   |   |
|----------|----------------------------------------------|------|---|---|
|          | IC=8;IHP= DP:DP2:T/52:52:51,5 85:85:67,6 C   | CA   | 0 | 0 |
|          | IC=9;IHP= DP:DP2:T/84:84:75,7 113:113:8E C   | CT   | 0 | 0 |
|          | IC=1;IHP= DP:DP2:T/67:67:69,6 137:137:11TCTC | T    | 0 | 0 |
|          | IC=8;IHP= DP:DP2:T/54:54:46,4 122:122:8E A   | AT   | 0 | 0 |
|          | IC=8;IHP= DP:DP2:T/177:177:17348:348:2E C    | CA   | 0 | 0 |
|          | IC=4;IHP= DP:DP2:T/183:183:1E 351:351:2E AG  | A    | 0 | 0 |
|          | IC=6;IHP= DP:DP2:T/52:52:49,4 137:137:9E AC  | A    | 0 | 0 |
|          | IC=9;IHP= DP:DP2:T/80:80:77,7 133:133:1C C   | CA   | 0 | 0 |
|          | IC=5;IHP= DP:DP2:T/35:35:36,3 66:66:51,5 GA  | G    | 0 | 0 |
|          | IC=7;IHP= DP:DP2:T/54:54:43,4 91:91:61,6 GA  | G    | 0 | 0 |
|          | IC=7;IHP= DP:DP2:T/84:84:81,8 131:131:1C CT  | C    | 0 | 0 |
|          | IC=8;IHP= DP:DP2:T/91:91:88,8 174:174:1E T   | TG   | 0 | 0 |
|          | IC=8;IHP= DP:DP2:T/37:37:32,3 87:87:60,6 G   | GA   | 0 | 0 |
|          | IC=2;IHP= DP:DP2:T/77:77:73,7 134:134:1C ACT | A    | 0 | 0 |
|          | IC=4;IHP= DP:DP2:T/77:77:76,7 140:140:1C GT  | G    | 0 | 0 |
|          | IC=9;IHP= DP:DP2:T/176:176:1E 391:391:2E G   | GC   | 0 | 0 |
|          | IC=4;IHP= DP:DP2:T/117:117:11188:188:1E AG   | A    | 0 | 0 |
|          | IC=6;IHP= DP:DP2:T/39:39:38,3 108:108:7E CG  | C    | 0 | 0 |
| 0.005587 | IC=7;IHP= DP:DP2:T/40:40:37,3 91:91:69,6 CT  | C    | 0 | 0 |
|          | IC=4;IHP= DP:DP2:T/62:62:61,6 86:86:61,6 TG  | T    | 0 | 0 |
|          | IC=7;IHP= DP:DP2:T/90:90:86,8 133:133:1C CT  | C    | 0 | 0 |
|          | IC=5;IHP= DP:DP2:T/162:162:1E 396:396:31TC   | T    | 0 | 0 |
|          | IC=7;IHP= DP:DP2:T/122:122:11204:204:14CG    | C    | 0 | 0 |
|          | IC=8;IHP= DP:DP2:T/43:43:40,4 122:122:9E G   | GA   | 0 | 0 |
|          | IC=7;IHP= DP:DP2:T/70:70:59,5 106:106:6E AC  | A    | 0 | 0 |
|          | IC=4;IHP= DP:DP2:T/133:133:1E 274:274:21GC   | G    | 0 | 0 |
|          | IC=7;IHP= DP:DP2:T/31:31:31,3 58:58:33,3 GA  | G    | 0 | 0 |
|          | IC=7;IHP= DP:DP2:T/62:62:57,5 106:106:7E GA  | G    | 0 | 0 |
|          | IC=9;IHP= DP:DP2:T/59:59:58,5 108:108:84C    | CA   | 0 | 0 |
|          | IC=7;IHP= DP:DP2:T/77:77:74,7 151:151:7E CA  | C    | 0 | 0 |
|          | IC=6;IHP= DP:DP2:T/131:131:1E 243:243:1E TC  | T    | 0 | 0 |
|          | IC=7;IHP= DP:DP2:T/56:56:51,5 89:89:62,6 A   | AG   | 0 | 0 |
|          | IC=9;IHP= DP:DP2:T/109:109:1C 179:179:1E G   | GT   | 0 | 0 |
| 0.003559 | IC=7;IHP= DP:DP2:T/62:62:63,6 107:107:8E ATG | A    | 0 | 0 |
|          | IC=6;IHP= DP:DP2:T/37:37:37,3 59:59:43,4 AT  | A    | 0 | 0 |
|          | IC=7;IHP= DP:DP2:T/52:52:50,5 55:55:35,3 CT  | C    | 0 | 0 |
|          | IC=9;IHP= DP:DP2:T/50:50:49,4 82:82:66,6 C   | CA   | 0 | 0 |
|          | IC=1;IHP= DP:DP2:T/61:61:59,5 87:87:62,6 TAG | T    | 0 | 0 |
|          | IC=7;IHP= DP:DP2:T/69:69:69,6 146:146:1C A   | AT   | 0 | 0 |
| 0.00354  | IC=6;IHP= DP:DP2:T/29:29:24,2 59:59:28,3 T   | TGCC | 0 | 0 |
|          | IC=9;IHP= DP:DP2:T/42:42:38,3 90:90:63,6 T   | TG   | 0 | 0 |
|          | IC=3;IHP= DP:DP2:T/88:88:86,8 145:145:1C TC  | T    | 0 | 0 |
|          | IC=8;IHP= DP:DP2:T/31:31:30,3 77:77:53,5 C   | CG   | 0 | 0 |
|          | IC=7;IHP= DP:DP2:T/47:47:43,4 65:65:46,4 GA  | G    | 0 | 0 |
|          | IC=7;IHP= DP:DP2:T/61:61:59,5 129:129:9E A   | AG   | 0 | 0 |
|          | IC=7;IHP= DP:DP2:T/103:103:97202:202:1E GA   | G    | 0 | 0 |
|          | IC=4;IHP= DP:DP2:T/144:144:1E 244:244:1E AC  | A    | 0 | 0 |
|          | IC=6;IHP= DP:DP2:T/107:107:9E 222:222:17T    | TC   | 0 | 0 |
|          | IC=6;IHP= DP:DP2:T/90:90:87,8 172:172:1E TA  | T    | 0 | 0 |
|          | IC=8;IHP= DP:DP2:T/111:111:1C 261:261:2C C   | CA   | 0 | 0 |
|          | IC=6;IHP= DP:DP2:T/100:100:1C 182:182:1E TG  | T    | 0 | 0 |
|          | IC=4;IHP= DP:DP2:T/91:91:89,8 161:161:11GA   | G    | 0 | 0 |
|          | IC=3;IHP= DP:DP2:T/117:117:11271:271:1E TG   | T    | 0 | 0 |
| 0.001767 | IC=6;IHP= DP:DP2:T/103:103:9E 214:214:1E CG  | C    | 0 | 0 |

|          |                                                    |      |   |   |
|----------|----------------------------------------------------|------|---|---|
| .        | IC=1;IHP= DP:DP2:T/123:123:12 256:256:22 GCCAGCC G |      | 0 | 0 |
| .        | IC=7;IHP= DP:DP2:T/42:42:38,3 65:65:40,4 A         | AGAG | 0 | 0 |
| .        | IC=7;IHP= DP:DP2:T/77:77:77,7 156:156:12 TA        | T    | 0 | 0 |
| .        | IC=6;IHP= DP:DP2:T/80:80:76,7 137:137:11 G         | GC   | 0 | 0 |
| .        | IC=7;IHP= DP:DP2:T/75:75:67,6 153:153:12 CT        | C    | 0 | 0 |
| .        | IC=5;IHP= DP:DP2:T/92:92:86,9 203:203:15 A         | AAAC | 0 | 0 |
| .        | IC=7;IHP= DP:DP2:T/75:75:71,7 137:137:11 GA        | G    | 0 | 0 |
| .        | IC=7;IHP= DP:DP2:T/154:154:14 336:336:27 G         | GC   | 0 | 0 |
| .        | IC=1;IHP= DP:DP2:T/23:23:21,2 48:48:26,2 CG        | C    | 0 | 0 |
| .        | IC=9;IHP= DP:DP2:T/111:111:10 187:187:13 C         | CT   | 0 | 0 |
| .        | IC=6;IHP= DP:DP2:T/90:90:89,9 209:209:17 CA        | C    | 0 | 0 |
| .        | IC=4;IHP= DP:DP2:T/68:68:64,6 130:130:9 A          | A    | 0 | 0 |
| .        | IC=7;IHP= DP:DP2:T/35:35:30,3 54:54:37,3 CT        | C    | 0 | 0 |
| .        | IC=7;IHP= DP:DP2:T/86:86:85,8 162:162:12 TA        | T    | 0 | 0 |
| .        | IC=6;IHP= DP:DP2:T/37:37:34,3 83:83:60,6 CT        | C    | 0 | 0 |
| 0.003565 | IC=6;IHP= DP:DP2:T/91:91:86,8 164:164:11 TAC       | T    | 0 | 0 |
| .        | IC=7;IHP= DP:DP2:T/150:150:14 221:221:1 A          | TC   | 0 | 0 |
| .        | IC=8;IHP= DP:DP2:T/116:116:11 236:236:1 A          | AC   | 0 | 0 |
| .        | IC=6;IHP= DP:DP2:T/66:66:63,6 122:122:7 GA         | G    | 0 | 0 |
| .        | IC=7;IHP= DP:DP2:T/94:94:88,8 225:225:1 CA         | C    | 0 | 0 |
| .        | IC=5;IHP= DP:DP2:T/104:104:97 223:223:17 CG        | C    | 0 | 0 |
| .        | IC=7;IHP= DP:DP2:T/50:50:43,4 80:80:55,5 A         | A    | 0 | 0 |
| .        | IC=9;IHP= DP:DP2:T/49:49:48,4 98:98:76,7 G         | GA   | 0 | 0 |
| .        | IC=6;IHP= DP:DP2:T/72:72:65,6 155:155:11 TG        | T    | 0 | 0 |
| .        | IC=7;IHP= DP:DP2:T/132:132:12 304:304:22 CT        | C    | 0 | 0 |
| .        | IC=9;IHP= DP:DP2:T/61:61:55,5 87:87:59,6 C         | CA   | 0 | 0 |
| .        | IC=7;IHP= DP:DP2:T/75:75:68,6 193:193:1 A          | A    | 0 | 0 |
| .        | IC=1;IHP= DP:DP2:T/67:67:70,7 72:72:61,6 CCTT      | C    | 0 | 0 |
| .        | IC=3;IHP= DP:DP2:T/227:227:22 425:425:3 CT         | C    | 0 | 0 |
| 0.012433 | IC=5;IHP= DP:DP2:T/71:71:71,7 123:123:9 A          | A    | 0 | 0 |
| .        | IC=5;IHP= DP:DP2:T/47:47:47,4 98:98:75,7 TG        | T    | 0 | 0 |
| .        | IC=4;IHP= DP:DP2:T/101:101:99 170:170:12 TG        | T    | 0 | 0 |
| .        | IC=7;IHP= DP:DP2:T/99:99:95,9 183:183:13 G         | GC   | 0 | 0 |
| .        | IC=8;IHP= DP:DP2:T/91:91:86,8 125:125:8 A          | AC   | 0 | 0 |
| .        | IC=5;IHP= DP:DP2:T/90:90:88,8 197:197:14 A         | A    | 0 | 0 |
| .        | IC=5;IHP= DP:DP2:T/40:40:40,4 77:77:58,5 A         | AG   | 0 | 0 |
| .        | IC=7;IHP= DP:DP2:T/41:41:39,3 90:90:62,6 A         | A    | 0 | 0 |
| .        | IC=6;IHP= DP:DP2:T/87:87:83,8 154:154:12 CA        | C    | 0 | 0 |
| .        | IC=6;IHP= DP:DP2:T/77:77:71,7 120:120:91 TA        | T    | 0 | 0 |
| .        | IC=9;IHP= DP:DP2:T/49:49:46,4 73:73:52,5 T         | TA   | 0 | 0 |
| .        | IC=9;IHP= DP:DP2:T/95:95:81,8 176:176:13 G         | GT   | 0 | 0 |
| .        | IC=7;IHP= DP:DP2:T/270:270:25 556:556:42 C         | CG   | 0 | 0 |
| .        | IC=9;IHP= DP:DP2:T/64:64:61,6 164:164:11 T         | TC   | 0 | 0 |
| .        | IC=6;IHP= DP:DP2:T/93:93:93,9 139:139:1 CT         | C    | 0 | 0 |
| .        | IC=0;IHP= DP:DP2:T/85:85:81,8 178:178:15 GACAA     | G    | 0 | 0 |
| .        | IC=3;IHP= DP:DP2:T/115:115:11 308:308:24 GGAA      | G    | 0 | 0 |
| .        | IC=6;IHP= DP:DP2:T/73:73:71,7 123:123:9 A          | A    | 0 | 0 |
| .        | IC=6;IHP= DP:DP2:T/82:82:81,8 131:131:1 CA         | C    | 0 | 0 |
| 0.002833 | IC=9;IHP= DP:DP2:T/49:49:43,4 80:80:57,5 G         | GC   | 0 | 0 |
| .        | IC=7;IHP= DP:DP2:T/75:75:75,7 165:165:12 GT        | G    | 0 | 0 |
| .        | IC=5;IHP= DP:DP2:T/41:41:39,6 80:80:55,6 T         | TG   | 0 | 0 |
| .        | IC=6;IHP= DP:DP2:T/159:159:15 362:362:27 TG        | T    | 0 | 0 |
| .        | IC=7;IHP= DP:DP2:T/75:75:74,7 181:181:14 A         | A    | 0 | 0 |
| .        | IC=7;IHP= DP:DP2:T/48:48:45,4 80:80:60,6 CA        | C    | 0 | 0 |



|          |                                                |     |   |   |
|----------|------------------------------------------------|-----|---|---|
| .        | IC=4;IHP= DP:DP2:T/95:95:95,9 176:176:13 GC    | G   | 0 | 0 |
| .        | IC=1;IHP= DP:DP2:T/64:64:64,6 124:124:10 CCCTT | C   | 0 | 0 |
| .        | IC=7;IHP= DP:DP2:T/93:93:86,8 204:204:15 T     | TTG | 0 | 0 |
| .        | IC=9;IHP= DP:DP2:T/46:46:40,4 51:51:32,3 C     | CA  | 0 | 0 |
| .        | IC=7;IHP= DP:DP2:T/62:62:60,6 88:88:69,6 CA    | C   | 0 | 0 |
| .        | IC=6;IHP= DP:DP2:T/57:57:56,5 120:120:84 AG    | A   | 0 | 0 |
| .        | IC=4;IHP= DP:DP2:T/95:95:93,9 189:189:15 AG    | A   | 0 | 0 |
| 0.00088  | IC=7;IHP= DP:DP2:T/125:125:11214:214:15 GA     | G   | 0 | 0 |
| .        | IC=5;IHP= DP:DP2:T/101:101:95 206:206:15 GC    | G   | 0 | 0 |
| .        | IC=7;IHP= DP:DP2:T/52:52:51,5 77:77:54,5 GA    | G   | 0 | 0 |
| .        | IC=7;IHP= DP:DP2:T/119:119:10 230:230:17 AC    | A   | 0 | 0 |
| .        | IC=0;IHP= DP:DP2:T/116:116:11228:228:15 AC     | A   | 0 | 0 |
| .        | IC=5;IHP= DP:DP2:T/96:96:90,9 130:130:95 AT    | A   | 0 | 0 |
| .        | IC=5;IHP= DP:DP2:T/59:59:59,6 114:114:92 AT    | A   | 0 | 0 |
| .        | IC=1;IHP= DP:DP2:T/70:70:69,7 116:116:95 AAAGT | A   | 0 | 0 |
| .        | IC=7;IHP= DP:DP2:T/98:98:93,9 156:156:11 CT    | C   | 0 | 0 |
| .        | IC=9;IHP= DP:DP2:T/47:47:46,4 97:97:74,7 C     | CT  | 0 | 0 |
| .        | IC=7;IHP= DP:DP2:T/59:59:54,5 101:101:70 CT    | C   | 0 | 0 |
| .        | IC=5;IHP= DP:DP2:T/84:84:81,8 187:187:14 TC    | T   | 0 | 0 |
| .        | IC=5;IHP= DP:DP2:T/56:56:55,5 112:112:85 GA    | G   | 0 | 0 |
| .        | IC=5;IHP= DP:DP2:T/80:80:78,7 129:129:95 A     | AAG | 0 | 0 |
| .        | IC=1;IHP= DP:DP2:T/53:53:54,5 110:110:85 GTTC  | G   | 0 | 0 |
| .        | IC=7;IHP= DP:DP2:T/54:54:51,5 107:107:77 AT    | A   | 0 | 0 |
| .        | IC=1;IHP= DP:DP2:T/64:64:66,6 64:64:47,4 TCTC  | T   | 0 | 0 |
| .        | IC=3;IHP= DP:DP2:T/916:916:90 1551:1551 TG     | T   | 0 | 0 |
| .        | IC=5;IHP= DP:DP2:T/194:194:15 363:363:27 T     | TC  | 0 | 0 |
| .        | IC=7;IHP= DP:DP2:T/85:85:81,8 203:203:15 CA    | C   | 0 | 0 |
| .        | IC=4;IHP= DP:DP2:T/120:120:11237:237:15 TC     | T   | 0 | 0 |
| 0.006184 | IC=6;IHP= DP:DP2:T/28:28:26,2 51:51:29,3 GTA   | G   | 0 | 0 |
| .        | IC=5;IHP= DP:DP2:T/180:180:17314:314:25 GC     | G   | 0 | 0 |
| .        | IC=6;IHP= DP:DP2:T/124:124:11245:245:15 TG     | T   | 0 | 0 |
| .        | IC=6;IHP= DP:DP2:T/83:83:84,8 167:167:15 AT    | A   | 0 | 0 |
| .        | IC=5;IHP= DP:DP2:T/78:78:76,7 164:164:11 CA    | C   | 0 | 0 |
| .        | IC=7;IHP= DP:DP2:T/135:135:12 259:259:15 CT    | C   | 0 | 0 |
| .        | IC=9;IHP= DP:DP2:T/56:56:52,5 105:105:81 T     | TG  | 0 | 0 |
| .        | IC=7;IHP= DP:DP2:T/113:113:11269:269:20 TG     | T   | 0 | 0 |
| 0.00499  | IC=5;IHP= DP:DP2:T/107:107:97 175:175:12 GT    | G   | 0 | 0 |
| .        | IC=0;IHP= DP:DP2:T/41:41:38,3 66:66:50,5 TAAAG | T   | 0 | 0 |
| .        | IC=7;IHP= DP:DP2:T/68:68:67,6 130:130:95 C     | CT  | 0 | 0 |
| .        | IC=7;IHP= DP:DP2:T/119:119:10 243:243:15 GC    | G   | 0 | 0 |
| .        | IC=5;IHP= DP:DP2:T/55:55:54,5 72:72:50,5 A     | AG  | 0 | 0 |
| .        | IC=7;IHP= DP:DP2:T/47:47:46,4 77:77:53,5 TG    | T   | 0 | 0 |
| .        | IC=8;IHP= DP:DP2:T/129:129:12 239:239:15 G     | GA  | 0 | 0 |
| .        | IC=6;IHP= DP:DP2:T/81:81:77,7 142:142:10 GA    | G   | 0 | 0 |
| 0.001767 | IC=6;IHP= DP:DP2:T/61:61:60,6 114:114:85 CT    | C   | 0 | 0 |
| .        | IC=5;IHP= DP:DP2:T/43:43:42,4 74:74:55,5 TA    | T   | 0 | 0 |
| .        | IC=5;IHP= DP:DP2:T/115:115:11241:241:15 CT     | C   | 0 | 0 |
| .        | IC=7;IHP= DP:DP2:T/74:74:71,7 97:97:70,7 AT    | A   | 0 | 0 |
| .        | IC=4;IHP= DP:DP2:T/77:77:77,7 182:182:15 AC    | A   | 0 | 0 |
| .        | IC=7;IHP= DP:DP2:T/51:51:50,5 118:118:82 CT    | C   | 0 | 0 |
| .        | IC=6;IHP= DP:DP2:T/33:33:31,3 52:52:36,3 CT    | C   | 0 | 0 |
| .        | IC=7;IHP= DP:DP2:T/40:40:37,3 110:110:85 CA    | C   | 0 | 0 |
| .        | IC=6;IHP= DP:DP2:T/67:67:66,6 133:133:10 CT    | C   | 0 | 0 |
| .        | IC=1;IHP= DP:DP2:T/72:72:73,7 129:129:10 CTG   | C   | 0 | 0 |

|          |                                          |         |      |   |   |
|----------|------------------------------------------|---------|------|---|---|
| .        | IC=7;IHP= DP:DP2:T/74:74:70,7 176:176:13 | GT      | G    | 0 | 0 |
| .        | IC=8;IHP= DP:DP2:T/75:75:74,7 149:149:11 | T       | TA   | 0 | 0 |
| .        | IC=9;IHP= DP:DP2:T/56:56:54,5 144:144:1  | C       | CT   | 0 | 0 |
| .        | IC=4;IHP= DP:DP2:T/144:144:14 278:278:21 | GC      | G    | 0 | 0 |
| .        | IC=5;IHP= DP:DP2:T/85:85:84,8 178:178:14 | TG      | T    | 0 | 0 |
| .        | IC=7;IHP= DP:DP2:T/82:82:81,8 156:156:11 | CA      | C    | 0 | 0 |
| .        | IC=4;IHP= DP:DP2:T/74:74:74,7 126:126:1  | GA      | G    | 0 | 0 |
| .        | IC=5;IHP= DP:DP2:T/99:99:97,9 198:198:15 | AC      | A    | 0 | 0 |
| .        | IC=4;IHP= DP:DP2:T/66:66:65,6 176:176:13 | GC      | G    | 0 | 0 |
| .        | IC=9;IHP= DP:DP2:T/119:119:11300:300:22  | G       | GA   | 0 | 0 |
| .        | IC=6;IHP= DP:DP2:T/80:80:74,7 156:156:12 | GC      | G    | 0 | 0 |
| .        | IC=9;IHP= DP:DP2:T/114:114:1192:192:11   | G       | GC   | 0 | 0 |
| .        | IC=7;IHP= DP:DP2:T/69:69:68,6 115:115:91 | CT      | C    | 0 | 0 |
| .        | IC=9;IHP= DP:DP2:T/78:78:78,7 154:154:12 | G       | GT   | 0 | 0 |
| .        | IC=5;IHP= DP:DP2:T/93:93:88,8 212:212:15 | AC      | A    | 0 | 0 |
| .        | IC=8;IHP= DP:DP2:T/56:56:47,4 107:107:75 | T       | TGA  | 0 | 0 |
| .        | IC=7;IHP= DP:DP2:T/55:55:53,5 105:105:8  | GT      | G    | 0 | 0 |
| .        | IC=8;IHP= DP:DP2:T/168:168:16416:416:35  | G       | GC   | 0 | 0 |
| .        | IC=6;IHP= DP:DP2:T/139:139:13233:233:15  | CG      | C    | 0 | 0 |
| .        | IC=1;IHP= DP:DP2:T/83:83:83,8 134:134:1  | ACT     | A    | 0 | 0 |
| .        | IC=7;IHP= DP:DP2:T/139:139:12250:250:15  | T       | TC   | 0 | 0 |
| .        | IC=6;IHP= DP:DP2:T/44:44:40,4 57:57:34,3 | TA      | T    | 0 | 0 |
| .        | IC=5;IHP= DP:DP2:T/92:92:91,9 181:181:14 | TG      | T    | 0 | 0 |
| .        | IC=6;IHP= DP:DP2:T/57:57:54,5 109:109:75 | TG      | T    | 0 | 0 |
| 0.002427 | IC=5;IHP= DP:DP2:T/129:129:12215:215:15  | AC      | A    | 0 | 0 |
| .        | IC=2;IHP= DP:DP2:T/107:107:1195:195:15   | GCTT    | G    | 0 | 0 |
| .        | IC=7;IHP= DP:DP2:T/26:26:27,2 45:45:29,3 | TA      | T    | 0 | 0 |
| .        | IC=1;IHP= DP:DP2:T/45:45:44,4 95:95:71,7 | ATC     | A    | 0 | 0 |
| .        | IC=6;IHP= DP:DP2:T/109:109:9276:276:21   | TG      | T    | 0 | 0 |
| .        | IC=6;IHP= DP:DP2:T/77:77:76,7 121:121:95 | GA      | G    | 0 | 0 |
| .        | IC=4;IHP= DP:DP2:T/111:111:11213:213:15  | TC      | T    | 0 | 0 |
| .        | IC=4;IHP= DP:DP2:T/99:99:96,9 229:229:15 | CT      | C    | 0 | 0 |
| .        | IC=0;IHP= DP:DP2:T/100:100:1166:166:15   | CCA     | C    | 0 | 0 |
| .        | IC=8;IHP= DP:DP2:T/82:82:67,6 149:149:95 | T       | TGGA | 0 | 0 |
| 0.00088  | IC=5;IHP= DP:DP2:T/79:79:78,7 158:158:12 | AC      | A    | 0 | 0 |
| .        | IC=5;IHP= DP:DP2:T/53:53:54,5 99:99:79,7 | CG      | C    | 0 | 0 |
| .        | IC=5;IHP= DP:DP2:T/61:61:55,5 145:145:1  | AT      | A    | 0 | 0 |
| .        | IC=4;IHP= DP:DP2:T/71:71:69,7 108:108:85 | GC      | G    | 0 | 0 |
| .        | IC=1;IHP= DP:DP2:T/160:160:15296:296:25  | ATGGAAT | A    | 0 | 0 |
| 0.000885 | IC=6;IHP= DP:DP2:T/176:176:17456:456:35  | GC      | G    | 0 | 0 |
| .        | IC=7;IHP= DP:DP2:T/31:31:31,3 47:47:32,3 | AT      | A    | 0 | 0 |
| .        | IC=5;IHP= DP:DP2:T/48:48:49,4 87:87:61,6 | TC      | T    | 0 | 0 |
| .        | IC=4;IHP= DP:DP2:T/144:144:14272:272:21  | GT      | G    | 0 | 0 |
| .        | IC=7;IHP= DP:DP2:T/71:71:68,6 167:167:12 | C       | CA   | 0 | 0 |
| .        | IC=7;IHP= DP:DP2:T/33:33:32,3 58:58:37,3 | CT      | C    | 0 | 0 |
| .        | IC=4;IHP= DP:DP2:T/45:45:44,4 54:54:33,3 | GA      | G    | 0 | 0 |
| .        | IC=8;IHP= DP:DP2:T/114:114:11197:197:14  | G       | GC   | 0 | 0 |
| .        | IC=2;IHP= DP:DP2:T/78:78:75,7 143:143:11 | CCCT    | C    | 0 | 0 |
| .        | IC=1;IHP= DP:DP2:T/187:187:18337:337:25  | T       | TC   | 0 | 0 |
| .        | IC=6;IHP= DP:DP2:T/90:90:89,8 197:197:14 | GA      | G    | 0 | 0 |
| .        | IC=6;IHP= DP:DP2:T/79:79:78,8 193:193:15 | GC      | G    | 0 | 0 |
| .        | IC=5;IHP= DP:DP2:T/55:55:52,5 131:131:95 | CG      | C    | 0 | 0 |
| .        | IC=1;IHP= DP:DP2:T/57:57:33,3 88:88:26,2 | G       | GC   | 0 | 0 |
| .        | IC=6;IHP= DP:DP2:T/81:81:76,7 175:175:12 | TC      | T    | 0 | 0 |

|          |                                              |    |   |   |
|----------|----------------------------------------------|----|---|---|
| .        | IC=5;IHP= DP:DP2:T/74:74:69,6 151:151:11GC   | G  | 0 | 0 |
| .        | IC=6;IHP= DP:DP2:T/69:69:62,6 124:124:92GA   | G  | 0 | 0 |
| .        | IC=5;IHP= DP:DP2:T/33:33:32,3 64:64:46,4CG   | C  | 0 | 0 |
| .        | IC=6;IHP= DP:DP2:T/228:228:21467:467:3EGC    | G  | 0 | 0 |
| .        | IC=4;IHP= DP:DP2:T/86:86:83,8 215:215:1ETG   | T  | 0 | 0 |
| .        | IC=5;IHP= DP:DP2:T/19:19:20,2 24:24:9,9:7TG  | T  | 0 | 0 |
| .        | IC=6;IHP= DP:DP2:T/154:154:14271:271:22GT    | G  | 0 | 0 |
| .        | IC=1;IHP= DP:DP2:T/61:61:63,6 112:112:8EGAGA | G  | 0 | 0 |
| .        | IC=7;IHP= DP:DP2:T/129:129:11265:265:1ETC    | T  | 0 | 0 |
| .        | IC=9;IHP= DP:DP2:T/107:107:1C225:225:17C     | CA | 0 | 0 |
| .        | IC=6;IHP= DP:DP2:T/27:27:24,2 52:52:30,3CA   | C  | 0 | 0 |
| .        | IC=5;IHP= DP:DP2:T/44:44:41,4 69:69:51,5CG   | C  | 0 | 0 |
| .        | IC=6;IHP= DP:DP2:T/240:240:2562:562:4AC      | A  | 0 | 0 |
| .        | IC=4;IHP= DP:DP2:T/75:75:71,7 131:131:1CGA   | G  | 0 | 0 |
| .        | IC=9;IHP= DP:DP2:T/77:77:72,7 127:127:94A    | AT | 0 | 0 |
| .        | IC=5;IHP= DP:DP2:T/267:267:25479:479:3EGC    | G  | 0 | 0 |
| .        | IC=5;IHP= DP:DP2:T/54:54:54,5 83:83:59,5T    | TC | 0 | 0 |
| .        | IC=4;IHP= DP:DP2:T/122:122:11196:196:1ETC    | T  | 0 | 0 |
| .        | IC=3;IHP= DP:DP2:T/129:129:15247:247:1ETG    | T  | 0 | 0 |
| .        | IC=4;IHP= DP:DP2:T/67:67:65,6 152:152:12CG   | C  | 0 | 0 |
| .        | IC=9;IHP= DP:DP2:T/95:95:93,9 188:188:14C    | CG | 0 | 0 |
| .        | IC=6;IHP= DP:DP2:T/45:45:47,4 74:74:52,5GA   | G  | 0 | 0 |
| .        | IC=3;IHP= DP:DP2:T/224:224:22547:547:44AC    | A  | 0 | 0 |
| .        | IC=9;IHP= DP:DP2:T/100:100:84192:192:12A     | AC | 0 | 0 |
| .        | IC=9;IHP= DP:DP2:T/185:185:17384:384:2ET     | TG | 0 | 0 |
| .        | IC=4;IHP= DP:DP2:T/26:26:34,3 38:38:21,2CG   | C  | 0 | 0 |
| .        | IC=6;IHP= DP:DP2:T/83:83:74,7 196:196:1ETC   | T  | 0 | 0 |
| .        | IC=4;IHP= DP:DP2:T/39:39:34,3 71:71:43,4CAG  | C  | 0 | 0 |
| .        | IC=6;IHP= DP:DP2:T/82:82:81,8 191:191:14T    | TG | 0 | 0 |
| .        | IC=4;IHP= DP:DP2:T/226:226:21418:418:3ETC    | T  | 0 | 0 |
| .        | IC=9;IHP= DP:DP2:T/246:246:2516:516:4CA      | AC | 0 | 0 |
| .        | IC=7;IHP= DP:DP2:T/104:104:1C207:207:1EAC    | A  | 0 | 0 |
| .        | IC=5;IHP= DP:DP2:T/156:156:14370:370:27GC    | G  | 0 | 0 |
| .        | IC=7;IHP= DP:DP2:T/39:39:36,3 84:84:62,6GA   | G  | 0 | 0 |
| .        | IC=7;IHP= DP:DP2:T/65:65:62,6 144:144:1CCT   | C  | 0 | 0 |
| .        | IC=6;IHP= DP:DP2:T/78:78:72,7 175:175:14GC   | G  | 0 | 0 |
| .        | IC=9;IHP= DP:DP2:T/136:136:12223:223:17A     | AG | 0 | 0 |
| .        | IC=8;IHP= DP:DP2:T/86:86:78,7 141:141:1CC    | CG | 0 | 0 |
| .        | IC=7;IHP= DP:DP2:T/34:34:33,3 51:51:37,3CA   | C  | 0 | 0 |
| .        | IC=5;IHP= DP:DP2:T/65:65:61,6 93:93:72,7TG   | T  | 0 | 0 |
| .        | IC=9;IHP= DP:DP2:T/95:95:90,9 161:161:12C    | CT | 0 | 0 |
| .        | IC=7;IHP= DP:DP2:T/104:104:1C230:230:17CA    | C  | 0 | 0 |
| .        | IC=7;IHP= DP:DP2:T/52:52:46,4 74:74:48,4AC   | A  | 0 | 0 |
| .        | IC=1;IHP= DP:DP2:T/97:97:96,9 158:158:1EGC   | G  | 0 | 0 |
| 0.001393 | IC=0;IHP= DP:DP2:T/26:26:25,2 48:48:28,2AG   | A  | 0 | 0 |
| .        | IC=5;IHP= DP:DP2:T/95:95:94,9 155:155:12GC   | G  | 0 | 0 |
| .        | IC=8;IHP= DP:DP2:T/149:149:14242:242:1EC     | CG | 0 | 0 |
| .        | IC=7;IHP= DP:DP2:T/127:127:11299:299:22TC    | T  | 0 | 0 |
| .        | IC=5;IHP= DP:DP2:T/72:72:72,7 137:137:1CTC   | T  | 0 | 0 |
| .        | IC=4;IHP= DP:DP2:T/47:47:44,4 102:102:77AG   | A  | 0 | 0 |
| .        | IC=6;IHP= DP:DP2:T/46:46:46,4 91:91:63,6CT   | C  | 0 | 0 |
| .        | IC=7;IHP= DP:DP2:T/86:86:83,8 133:133:1CAG   | A  | 0 | 0 |
| .        | IC=5;IHP= DP:DP2:T/75:75:71,7 176:176:12AC   | A  | 0 | 0 |
| .        | IC=5;IHP= DP:DP2:T/129:129:11262:262:1EGC    | G  | 0 | 0 |

|          |                                                    |          |   |   |
|----------|----------------------------------------------------|----------|---|---|
| .        | IC=7;IHP= DP:DP2:T/137:137:12 240:240:1E A         | AC       | 0 | 0 |
| .        | IC=6;IHP= DP:DP2:T/51:51:49,5 82:82:46,4 AC        | A        | 0 | 0 |
| .        | IC=6;IHP= DP:DP2:T/48:48:48,4 135:135:1C GT        | G        | 0 | 0 |
| .        | IC=5;IHP= DP:DP2:T/88:88:87,8 136:136:11CT         | C        | 0 | 0 |
| .        | IC=8;IHP= DP:DP2:T/94:94:91,9 200:200:14 G         | GC       | 0 | 0 |
| .        | IC=9;IHP= DP:DP2:T/72:72:66,6 123:123:9E A         | AT       | 0 | 0 |
| .        | IC=7;IHP= DP:DP2:T/81:81:79,7 113:113:7E AG        | A        | 0 | 0 |
| .        | IC=8;IHP= DP:DP2:T/118:118:11203:203:1E A          | AC       | 0 | 0 |
| .        | IC=5;IHP= DP:DP2:T/167:167:1E 372:372:2E T         | TG       | 0 | 0 |
| .        | IC=7;IHP= DP:DP2:T/74:74:72,7 134:134:1C G         | GC       | 0 | 0 |
| .        | IC=5;IHP= DP:DP2:T/118:118:11268:268:21TG          | T        | 0 | 0 |
| .        | IC=5;IHP= DP:DP2:T/53:53:53,5 74:74:58,5 CG        | C        | 0 | 0 |
| .        | IC=9;IHP= DP:DP2:T/81:81:77,7 159:159:1C A         | AG       | 0 | 0 |
| .        | IC=0;IHP= DP:DP2:T/46:46:46,4 81:81:61,6 CCGG      | C        | 0 | 0 |
| .        | IC=2;IHP= DP:DP2:T/124:124:12 212:212:1E A         | AGGTGCT  | 0 | 0 |
| .        | IC=2;IHP= DP:DP2:T/125:125:1C 237:237:1E C         | CCTGAAC  | 0 | 0 |
| .        | IC=0;IHP= DP:DP2:T/81:81:90,9 161:161:17CCATCTT C  | C        | 0 | 0 |
| .        | IC=2;IHP= DP:DP2:T/90:90:86,8 149:149:1E AGCACTG A | A        | 0 | 0 |
| .        | IC=0;IHP= DP:DP2:T/73:73:73,7 165:165:1E GTCTCCC G | G        | 0 | 0 |
| .        | IC=0;IHP= DP:DP2:T/95:95:81,8 169:169:14CATTTGT C  | C        | 0 | 0 |
| .        | IC=2;IHP= DP:DP2:T/145:145:1E 152:152:1E GGAGGC(G  | G        | 0 | 0 |
| 0.004448 | IC=2;IHP= DP:DP2:T/90:90:87,9 122:122:11T          | TTGTGC   | 0 | 0 |
| 0.286092 | IC=1;IHP= DP:DP2:T/16:16:16,1 7:7:1,1:6,6 G        | GGAA     | 0 | 0 |
| .        | IC=1;IHP= DP:DP2:T/77:77:76,9 107:107:91A          | AGGAGG   | 0 | 0 |
| .        | IC=0;IHP= DP:DP2:T/80:80:84,9 149:149:1E AGGAGG/A  | A        | 0 | 0 |
| .        | IC=5;IHP= DP:DP2:T/171:171:1E 229:229:2C ATCCTCC A | A        | 0 | 0 |
| .        | IC=1;IHP= DP:DP2:T/100:100:1C 133:133:11T          | TTCACGG  | 0 | 0 |
| .        | IC=0;IHP= DP:DP2:T/219:219:2C 189:189:1E CGGATGCC  | C        | 0 | 0 |
| .        | IC=0;IHP= DP:DP2:T/76:76:106, 108:108:12GCGTCCC G  | G        | 0 | 0 |
| .        | IC=0;IHP= DP:DP2:T/81:81:89,8 149:149:1E ACTCAAT A | A        | 0 | 0 |
| 0.00088  | IC=4;IHP= DP:DP2:T/114:114:8E 243:243:1E AAAAAC A  | A        | 0 | 0 |
| .        | IC=0;IHP= DP:DP2:T/82:82:82,8 148:148:14TCCATGT T  | T        | 0 | 0 |
| .        | IC=0;IHP= DP:DP2:T/83:83:79,9 240:240:2E AGGTGTCA  | A        | 0 | 0 |
| .        | IC=2;IHP= DP:DP2:T/90:90:89,8 159:159:14ACTCCT A   | A        | 0 | 0 |
| 0.00088  | IC=2;IHP= DP:DP2:T/130:130:12 158:158:14CCAGTA C   | C        | 0 | 0 |
| .        | IC=1;IHP= DP:DP2:T/116:116:12 241:241:2E AGAGTT A  | A        | 0 | 0 |
| .        | IC=0;IHP= DP:DP2:T/123:123:12 248:248:24CCGGGAC C  | C        | 0 | 0 |
| .        | IC=0;IHP= DP:DP2:T/147:147:1E 194:194:17GCCAAGC G  | G        | 0 | 0 |
| .        | IC=1;IHP= DP:DP2:T/78:78:78,7 159:159:12GA         | G        | 0 | 0 |
| .        | IC=2;IHP= DP:DP2:T/98:98:91,9 200:200:1E G         | GCAA     | 0 | 0 |
| .        | IC=2;IHP= DP:DP2:T/101:101:9E 232:232:17A          | ACGC     | 0 | 0 |
| .        | IC=0;IHP= DP:DP2:T/65:65:75,7 121:121:12TGGGGACT   | T        | 0 | 0 |
| 0.190813 | IC=7;IHP= DP:DP2:T/20:20:18,1 35:35:11,1 G         | GT       | 0 | 0 |
| .        | IC=0;IHP= DP:DP2:T/60:60:70,7 72:72:67,6 AAGTTGCA  | A        | 0 | 0 |
| .        | IC=4;IHP= DP:DP2:T/115:115:1C 186:186:1E CGAGGACC  | C        | 0 | 0 |
| .        | IC=0;IHP= DP:DP2:T/40:40:45,4 51:51:41,4 GGCCGC(G  | G        | 0 | 0 |
| .        | IC=2;IHP= DP:DP2:T/111:111:1C 223:223:1E AC        | A        | 0 | 0 |
| .        | IC=0;IHP= DP:DP2:T/499:499:54 706:706:6E CGCCGCC C | C        | 0 | 0 |
| .        | IC=7;IHP= DP:DP2:T/92:92:91,9 219:219:17A          | AG       | 0 | 0 |
| .        | IC=7;IHP= DP:DP2:T/106:106:9E 71:71:44,4 A         | AC       | 0 | 0 |
| 0.048893 | IC=5;IHP= DP:DP2:T/90:90:64,6 234:234:1E C         | CGCGGG(G | 0 | 0 |
| .        | IC=2;IHP= DP:DP2:T/75:75:74,7 102:102:8C GC        | G        | 0 | 0 |
| .        | IC=7;IHP= DP:DP2:T/225:225:21298:298:2E C          | CG       | 0 | 0 |
| .        | IC=0;IHP= DP:DP2:T/114:114:1E 178:178:1E CCCCCAA C | C        | 0 | 0 |

|          |                                                   |        |   |   |
|----------|---------------------------------------------------|--------|---|---|
| .        | IC=4;IHP= DP:DP2:T/77:77:75,7 180:180:14T         | TG     | 0 | 0 |
| .        | IC=1;IHP= DP:DP2:T/54:54:52,5 56:56:37,3 ATCT     | A      | 0 | 0 |
| .        | IC=2;IHP= DP:DP2:T/76:76:76,7 117:117:92T         | TA     | 0 | 0 |
| 0.003521 | IC=2;IHP= DP:DP2:T/76:76:77,7 151:151:14CGGGCG    | C      | 0 | 0 |
| .        | IC=2;IHP= DP:DP2:T/74:74:72,7 93:93:79,7 C        | CTTG   | 0 | 0 |
| .        | IC=2;IHP= DP:DP2:T/72:72:73,7 68:68:58,5 CAAGGG   | C      | 0 | 0 |
| .        | IC=3;IHP= DP:DP2:T/90:90:88,8 60:60:47,5 G        | GC     | 0 | 0 |
| .        | IC=6;IHP= DP:DP2:T/101:101:90 151:151:12CCAGCAC   | C      | 0 | 0 |
| .        | IC=0;IHP= DP:DP2:T/29:29:29,2 82:82:55,5 TA       | T      | 0 | 0 |
| 0.002727 | IC=0;IHP= DP:DP2:T/191:191:19 202:202:19TTTTTG    | T      | 0 | 0 |
| .        | IC=2;IHP= DP:DP2:T/82:82:78,7 198:198:19CG        | C      | 0 | 0 |
| .        | IC=2;IHP= DP:DP2:T/67:67:65,6 175:175:12G         | GT     | 0 | 0 |
| .        | IC=1;IHP= DP:DP2:T/109:109:10 88:88:76,7 A        | AATTCT | 0 | 0 |
| .        | IC=0;IHP= DP:DP2:T/77:77:82,8 242:242:29AGAGCG(A  |        | 0 | 0 |
| .        | IC=0;IHP= DP:DP2:T/84:84:89,8 178:178:19CCCAGG(A  | C      | 0 | 0 |
| .        | IC=1;IHP= DP:DP2:T/81:81:78,7 77:77:63,6 AGAGCCC  | A      | 0 | 0 |
| .        | IC=0;IHP= DP:DP2:T/73:73:88,8 81:81:72,7 GCCGCG(G |        | 0 | 0 |
| .        | IC=1;IHP= DP:DP2:T/93:93:97,9 163:163:19CGAGGT(C  | C      | 0 | 0 |
| .        | IC=0;IHP= DP:DP2:T/19:19:20,2 50:50:28,2 TTGATCA  | T      | 0 | 0 |
| .        | IC=0;IHP= DP:DP2:T/48:48:46,4 33:33:24,2 TA       | T      | 0 | 0 |
| 0.001393 | IC=2;IHP= DP:DP2:T/148:148:14 279:279:29GGGGCC    | G      | 0 | 0 |
| 0.000882 | IC=4;IHP= DP:DP2:T/161:161:14 222:222:17TCCGCCCT  |        | 0 | 0 |
| .        | IC=2;IHP= DP:DP2:T/126:126:12 145:145:72G         | GCTGT  | 0 | 0 |
| .        | IC=2;IHP= DP:DP2:T/81:81:76,8 104:104:52C         | CT     | 0 | 0 |
| .        | IC=8;IHP= DP:DP2:T/118:118:10 295:295:19A         | AT     | 0 | 0 |
| .        | IC=0;IHP= DP:DP2:T/53:53:55,5 182:182:19AGG       | A      | 0 | 0 |
| .        | IC=3;IHP= DP:DP2:T/113:113:11 232:232:19CTT       | C      | 0 | 0 |
| .        | IC=0;IHP= DP:DP2:T/77:77:79,8 69:69:62,6 GTCTGCC  | G      | 0 | 0 |

| OMIM        | GWAS_Pu | HGMD_ID | GO_BP     | GO_CC      | GO_MF     | KEGG_PA  | PID_PATH  | BIOCART/ |
|-------------|---------|---------|-----------|------------|-----------|----------|-----------|----------|
| .           | NA      | .       | MULTI_OF. |            | TRANSCR.  |          |           |          |
| {Celiac dis | NA      | .       | IMMUNE_I  | INTRINSIC. |           | KEGG_CE  | PID_NFAT  | BIOCART/ |
| .           | NA      | .       |           |            |           |          |           |          |
| .           | NA      | .       | ESTABLIS  | ORGANEL.   |           | KEGG_SN. |           |          |
| .           | NA      | .       |           |            |           |          |           |          |
| .           | NA      | .       |           |            |           |          |           |          |
| .           | NA      | .       |           |            |           | KEGG_OL. |           |          |
| .           | NA      | .       |           |            |           |          |           |          |
| .           | NA      | .       |           |            | CYTOPLA   | ENZYME_  | KEGG_CY.  |          |
| 17-beta-hy  | NA      | .       | LIPID_ME  | CYTOPLA    | STEROID_  | KEGG_VA. |           |          |
| .           | NA      | .       |           |            |           |          |           |          |
| .           | NA      | .       | MULTI_OF  | INTRINSIC  | TRANSME   | KEGG_CY  | PID_GLYP  | BIOCART/ |
| Bleeding di | NA      | .       | FOCAL_AI  | ADHEREN    | INTEGRIN  | KEGG_FO  | PID_ILK_F | BIOCART/ |
| .           | NA      | .       |           |            |           |          |           |          |
| .           | NA      | .       | RNA_MET   | ORGANEL.   |           | KEGG_SP. |           |          |
| .           | NA      | .       | RNA_MET   | NUCLEUS    | RNA_BINC. |          |           |          |
| .           | NA      | .       |           |            |           | KEGG_TG. |           |          |
| .           | NA      | .       |           |            |           |          |           |          |
| Bronchiect  | NA      | .       | ESTABLIS  | INTRINSIC  | CATION_T  | KEGG_TA. |           |          |
| .           | NA      | .       |           |            |           |          |           |          |
| .           | NA      | .       |           |            |           |          |           |          |
| .           | NA      | .       |           |            |           |          |           |          |
| .           | NA      | .       |           |            |           |          | PID_TAP6. |          |
| .           | NA      | .       |           |            |           |          |           |          |
| .           | NA      | .       | RNA_MET   | NUCLEOP.   |           |          |           |          |
| .           | NA      | .       |           |            |           |          |           |          |
| .           | NA      | .       |           |            |           |          |           |          |
| .           | NA      | .       |           |            | RECEPTO   | KEGG_CY  | PID_TNFP  | BIOCART/ |
| .           | NA      | .       |           |            |           |          |           |          |
| Mental ret  | NA      | .       | RNA_MET   | NUCLEOP    | TRANSCR.  |          |           |          |
| .           | NA      | .       |           |            | CYTOPLA   |          |           |          |
| .           | NA      | .       |           |            | CYTOPLA   |          |           |          |
| .           | NA      | .       | NUCLEOB.  |            | TRANSCR.  |          |           |          |
| .           | NA      | .       |           |            |           |          |           |          |
| .           | NA      | .       |           |            |           |          | PID_ATF2. |          |
| .           | NA      | .       | TRNA_PR   |            | LIGASE_A  | KEGG_AM. |           |          |
| .           | NA      | .       | POSITIVE_ |            | HYDROLA.  |          | PID_PRLS. |          |
| .           | NA      | .       | GLYCOPR   | INTRINSIC. |           | KEGG_NC  | PID_NOTC. |          |
| .           | NA      | .       |           |            |           | KEGG_UB. |           |          |
| .           | NA      | .       |           |            | PHOSPHC.  |          |           |          |
| .           | NA      | .       |           |            |           |          |           |          |
| .           | NA      | .       | PROTEOL.  |            | METALLO.  |          |           |          |
| .           | NA      | .       |           |            |           |          |           |          |
| .           | NA      | .       |           |            | CYTOPLA   | HYDROLA. |           |          |
| Severe cor  | NA      | .       | REGULAT   | INTRINSIC  | PROTEIN_  | KEGG_CE  | PID_BCR_  | BIOCART/ |
| .           | NA      | .       |           |            |           |          |           |          |
| .           | NA      | .       |           |            |           |          |           |          |
| .           | NA      | .       | BIOPOLYM  | CELL_JUN   | NUCLEOT.  |          | PID_CDC4. |          |
| .           | NA      | .       |           |            |           |          |           |          |
| .           | NA      | .       |           |            |           |          |           |          |

|              |    |   |           |           |          |          |          |
|--------------|----|---|-----------|-----------|----------|----------|----------|
| .            | NA | . | BIOPOLYM. | PHOSPHC   | KEGG_CH  | PID_RHO/ | BIOCART/ |
| .            | NA | . | .         | .         | .        | .        | .        |
| .            | NA | . | CELL_DE\  | ORGANEL   | PEPTIDE_ | .        | .        |
| .            | NA | . | .         | .         | .        | .        | .        |
| .            | NA | . | PHOSPHC   | ORGANEL   | TRANSFE  | KEGG_GL  | .        |
| .            | NA | . | MACROM(   | CYTOPLA   | RIBONUCL | .        | .        |
| .            | NA | . | .         | EXTRACE   | .        | .        | .        |
| .            | NA | . | .         | .         | .        | .        | .        |
| .            | NA | . | MULTICEL  | NUCLEUS   | .        | .        | .        |
| .            | NA | . | MULTI_OF  | .         | TRANSCR  | .        | .        |
| .            | NA | . | REGULAT   | INTRINSIC | TRANSME  | KEGG_CY  | PID_ALK1 |
| .            | NA | . | .         | .         | .        | .        | .        |
| .            | NA | . | .         | .         | .        | .        | .        |
| .            | NA | . | .         | .         | .        | .        | .        |
| .            | NA | . | .         | .         | .        | .        | .        |
| .            | NA | . | .         | .         | RNA_POL  | KEGG_MA  | PID_SMA  |
| .            | NA | . | SIGNAL_T  | .         | KEGG_PU  | .        | .        |
| Pigmented    | NA | . | .         | .         | .        | .        | .        |
| .            | NA | . | .         | .         | .        | .        | .        |
| Cardiomyo    | NA | . | MUSCLE_   | ORGANEL   | NUCLEOT  | KEGG_HY  | .        |
| Candidiasi:  | NA | . | RNA_MET   | CYTOPLA   | RECEPTO  | KEGG_CH  | PID_GMC  |
| .            | NA | . | POSITIVE_ | CYTOPLA   | TRANSLA  | .        | .        |
| .            | NA | . | .         | .         | .        | .        | .        |
| .            | NA | . | SYSTEM_   | INTRINSIC | INTEGRIN | .        | .        |
| Mitochondi   | NA | . | .         | .         | .        | .        | .        |
| .            | NA | . | .         | .         | .        | .        | .        |
| .            | NA | . | .         | .         | .        | .        | .        |
| .            | NA | . | .         | .         | .        | .        | BIOCART/ |
| .            | NA | . | .         | .         | .        | .        | .        |
| .            | NA | . | SYSTEM_   | CYTOPLA   | RAS_GUA  | KEGG_AD  | PID_NECT |
| .            | NA | . | SYSTEM_   | .         | .        | PID_NOTC | .        |
| .            | NA | . | REGULAT   | CYTOPLA   | GTPASE_  | .        | .        |
| ?Congenit:   | NA | . | GLYCOPR   | CYTOPLA   | .        | .        | .        |
| .            | NA | . | .         | CYTOPLA   | .        | .        | .        |
| .            | NA | . | .         | .         | .        | .        | .        |
| .            | NA | . | RNA_MET   | NUCLEUS   | RNA_BIN  | .        | .        |
| .            | NA | . | .         | .         | .        | .        | .        |
| .            | NA | . | BIOPOLYM  | CYTOPLA   | ENZYME_  | KEGG_CH  | PID_ENDC |
| Sinoatrial r | NA | . | ESTABLIS  | MEMBRAN   | CATION_T | KEGG_MA  | .        |
| .            | NA | . | .         | .         | .        | .        | .        |
| ACAD9 de:    | NA | . | .         | .         | .        | .        | .        |
| .            | NA | . | .         | .         | .        | PID_TRKR | .        |
| .            | NA | . | .         | .         | .        | .        | .        |
| .            | NA | . | MUSCLE_   | CYTOPLA   | RNA_BIN  | .        | .        |
| .            | NA | . | REGULAT   | INTRINSIC | .        | KEGG_CE  | .        |
| .            | NA | . | SYSTEM_   | .         | .        | KEGG_TG  | PID_BMPF |
| .            | NA | . | .         | .         | .        | .        | BIOCART/ |
| .            | NA | . | .         | .         | .        | .        | .        |
| UV-sensiti   | NA | . | .         | .         | .        | .        | .        |
| .            | NA | . | .         | .         | .        | .        | .        |
| .            | NA | . | .         | .         | KEGG_GL  | .        | .        |
| .            | NA | . | .         | .         | .        | .        | .        |
| .            | NA | . | .         | .         | .        | .        | .        |
| .            | NA | . | .         | .         | .        | .        | .        |
| Adermatog    | NA | . | DNA_MET   | .         | .        | .        | .        |
| Hypomagn     | NA | . | DNA_MET   | MEMBRAN   | RECEPTO  | KEGG_MA  | PID_PTP1 |
|              |    | . |           |           |          |          | BIOCART/ |

|              |    |   |   |           |           |           |           |
|--------------|----|---|---|-----------|-----------|-----------|-----------|
| .            | NA | . | . | MACROMOL  | KEGG_ER   | PID_IFNGI | BIOCART/  |
| .            | NA | . | . | ARYLSULF  | .         | .         | .         |
| .            | NA | . | . | .         | .         | .         | .         |
| .            | NA | . | . | .         | KEGG_BA   | .         | .         |
| .            | NA | . | . | .         | .         | .         | .         |
| .            | NA | . | . | .         | .         | .         | .         |
| .            | NA | . | . | ENZYME_   | PHOSPHC   | PID_RHO/  | BIOCART/  |
| Chondroca    | NA | . | . | SYSTEM_   | MEMBRAN   | ACTIVE_T  | .         |
| .            | NA | . | . | .         | .         | .         | .         |
| Joubert sy   | NA | . | . | .         | .         | .         | .         |
| Amyloidosi   | NA | . | . | SIGNAL_T  | INTRINSIC | RECEPTO   | KEGG_CY   |
| .            | NA | . | . | .         | .         | .         | .         |
| Hermansky    | NA | . | . | ESTABLIS  | CYTOPLA   | !         | KEGG_LY!  |
| Acampomε     | NA | . | . | CELL_DE\  | RIBONUCL  | .         | PID_ERA_  |
| .            | NA | . | . | .         | .         | .         | .         |
| .            | NA | . | . | .         | .         | .         | .         |
| .            | NA | . | . | SYSTEM_   | EXTRACE   | .         | KEGG_AX   |
| .            | NA | . | . | SYSTEM_   | EXTRACE   | .         | KEGG_AX   |
| .            | NA | . | . | .         | .         | .         | KEGG_GL   |
| .            | NA | . | . | DEFENSE   | .         | .         | KEGG_NA   |
| Trichohepε   | NA | . | . | .         | HYDROLA   | KEGG_RN   | .         |
| .            | NA | . | . | BIOPOLYM  | INTRINSIC | RECEPTO   | PID_AMB2  |
| .            | NA | . | . | .         | .         | .         | .         |
| .            | NA | . | . | .         | .         | .         | KEGG_CE   |
| .            | NA | . | . | .         | .         | .         | .         |
| .            | NA | . | . | .         | .         | .         | .         |
| .            | NA | . | . | .         | .         | .         | .         |
| Obesity, se  | NA | . | . | SYSTEM_   | TRANSCR   | .         | .         |
| Mental retε  | NA | . | . | REGULAT   | INTRINSIC | GLUTAMA   | KEGG_NE   |
| .            | NA | . | . | .         | .         | .         | .         |
| .            | NA | . | . | ESTABLIS  | MEMBRAN   | .         | .         |
| {Psoriasis : | NA | . | . | POSITIVE_ | .         | .         | .         |
| Cardiomyo    | NA | . | . | .         | PROTEIN/  | STRUCTU   | KEGG_FO   |
| .            | NA | . | . | .         | .         | .         | PID_INTE( |
| .            | NA | . | . | SIGNAL_T  | GTP_BINC  | .         | .         |
| .            | NA | . | . | .         | .         | .         | .         |
| .            | NA | . | . | .         | .         | .         | .         |
| Hepatocell   | NA | . | . | ESTABLIS  | ORGANEL   | TRANSME   | KEGG_LY!  |
| .            | NA | . | . | .         | .         | .         | .         |
| .            | NA | . | . | .         | .         | .         | .         |
| .            | NA | . | . | .         | .         | .         | .         |
| .            | NA | . | . | MULTICEL  | .         | .         | .         |
| .            | NA | . | . | .         | .         | .         | .         |
| .            | NA | . | . | PROTEIN_  | CYTOPLA   | ENZYME_   | KEGG_NC   |
| .            | NA | . | . | PROTEIN_  | CYTOPLA   | ENZYME_   | KEGG_NC   |
| .            | NA | . | . | NEGATIVE  | CYTOPLA   | !         | .         |
| .            | NA | . | . | .         | .         | .         | .         |
| .            | NA | . | . | .         | .         | .         | .         |
| Cutis laxa,  | NA | . | . | SYSTEM_   | .         | .         | .         |
| .            | NA | . | . | .         | .         | .         | .         |
| .            | NA | . | . | .         | .         | .         | .         |
| .            | NA | . | . | SYSTEM_   | INTRINSIC | .         | KEGG_AX   |
| .            | NA | . | . | .         | .         | PID_EPHE  | .         |



|              |    |   |           |           |           |           |
|--------------|----|---|-----------|-----------|-----------|-----------|
| .            | NA | . | RNA_MET.  | RNA_POL.  | .         | .         |
| .            | NA | . | .         | .         | .         | .         |
| .            | NA | . | STEROID.  | ALDO_KE   | KEGG_FR.  | .         |
| .            | NA | . | ORGANEL.  | .         | .         | .         |
| Ventricular  | NA | . | .         | .         | .         | .         |
| Barrett esc  | NA | . | ESTABLIS  | INTRINSIC | RECEPTO.  | .         |
| .            | NA | . | .         | .         | KEGG_EN.  | .         |
| .            | NA | . | .         | .         | .         | .         |
| .            | NA | . | .         | .         | .         | .         |
| {?Schizop    | NA | . | NEGATIVE. | TRANSCR   | KEGG_ER   | PID_ERBE  |
| .            | NA | . | .         | .         | .         | BIOCART/  |
| .            | NA | . | REGULAT   | MEMBRAN   | PHOSPHC   | KEGG_CH   |
| .            | NA | . | SYSTEM_   | TRANSCR.  | PID_FCER  | BIOCART/  |
| .            | NA | . | .         | .         | PID_HES_. | .         |
| .            | NA | . | .         | .         | .         | .         |
| .            | NA | . | .         | .         | .         | .         |
| Seizures, t  | NA | . | ESTABLIS  | INTRINSIC | CATION_T. | .         |
| .            | NA | . | SYSTEM_   | INTRINSIC | G_PROTE   | KEGG_P5.  |
| .            | NA | . | .         | CYTOPLA   | ELECTRO   | KEGG_OX.  |
| .            | NA | . | .         | .         | .         | .         |
| .            | NA | . | RESPONS.  | .         | .         | .         |
| .            | NA | . | MACROM    | CELL_PR   | PROTEIN_  | KEGG_FO   |
| .            | NA | . | .         | .         | PID_RHO/  | BIOCART/  |
| .            | NA | . | .         | .         | .         | .         |
| .            | NA | . | .         | NUCLEUS.  | .         | .         |
| Basal cell c | NA | . | SYSTEM_   | INTRINSIC | RECEPTO   | KEGG_HE   |
| Basal cell c | NA | . | SYSTEM_   | INTRINSIC | RECEPTO   | KEGG_HE   |
| .            | NA | . | BIOPOLY   | ORGANEL.  | .         | .         |
| .            | NA | . | .         | .         | KEGG_OL.  | .         |
| .            | NA | . | .         | NUCLEUS.  | .         | .         |
| .            | NA | . | ESTABLIS  | CYTOPLA   | .         | .         |
| .            | NA | . | .         | .         | .         | .         |
| .            | NA | . | .         | .         | .         | .         |
| .            | NA | . | PROTEOL   | ORGANEL   | METALLO.  | .         |
| .            | NA | . | .         | .         | .         | .         |
| .            | NA | . | .         | .         | .         | .         |
| .            | NA | . | .         | .         | .         | .         |
| .            | NA | . | .         | .         | .         | .         |
| .            | NA | . | .         | .         | .         | .         |
| .            | NA | . | CARBOXY.  | .         | KEGG_AL.  | .         |
| .            | NA | . | .         | .         | .         | .         |
| .            | NA | . | .         | .         | .         | .         |
| .            | NA | . | RNA_MET.  | NUCLEAR.  | .         | .         |
| .            | NA | . | .         | ORGANEL   | HYDROLA.  | .         |
| .            | NA | . | .         | .         | .         | .         |
| .            | NA | . | .         | .         | .         | .         |
| .            | NA | . | .         | .         | PID_AR_P. | .         |
| .            | NA | . | IMMUNE_   | CYTOPLA   | .         | .         |
| .            | NA | . | .         | .         | .         | .         |
| Cone dyst    | NA | . | SENSORY.  | .         | KEGG_PU   | PID_CONE. |
| .            | NA | . | .         | ORGANEL   | STRUCTU.  | .         |
| .            | NA | . | .         | NUCLEAR.  | .         | .         |
| .            | NA | . | REGULAT   | NUCLEOP   | PROTEIN_. | PID_MTOF. |
| {Influenza,  | NA | . | IMMUNE_   | MEMBRAN.  | .         | .         |
| .            | NA | . | .         | .         | .         | .         |
| .            | NA | . | SYSTEM_   | NUCLEOT.  | PID_LKB1. | .         |
| .            | NA | . | .         | .         | KEGG_OL.  | .         |

|              |    |   |          |           |          |         |           |          |   |
|--------------|----|---|----------|-----------|----------|---------|-----------|----------|---|
| .            | NA | . | .        | .         | .        | .       | .         | .        | . |
| .            | NA | . | .        | .         | .        | .       | .         | .        | . |
| .            | NA | . | .        | .         | .        | .       | .         | .        | . |
| Dystonia 2.  | NA | . | .        | .         | .        | .       | .         | .        | . |
| .            | NA | . | .        | .         | KEGG_ST  | .       | .         | .        | . |
| {Diabetes r  | NA | . | ESTABLIS | CYTOPLA   | KINASE_B | KEGG_MA | PID_REEL  | .        | . |
| .            | NA | . | .        | .         | .        | .       | .         | .        | . |
| .            | NA | . | .        | .         | RNA_BIN  | .       | .         | .        | . |
| .            | NA | . | SIGNAL_T | CYTOPLA   | .        | KEGG_CH | PID_HDAC  | .        | . |
| .            | NA | . | .        | .         | .        | .       | .         | .        | . |
| .            | NA | . | .        | .         | .        | .       | .         | .        | . |
| .            | NA | . | MEMBRAN  | PHOSPHC   | .        | .       | .         | .        | . |
| .            | NA | . | .        | .         | .        | .       | .         | .        | . |
| Hemorrhag    | NA | . | .        | .         | .        | KEGG_CE | PID_AMB2  | .        | . |
| .            | NA | . | RNA_MET  | ORGANEL   | TRANSCR  | .       | .         | .        | . |
| .            | NA | . | .        | .         | TRANSFE  | KEGG_O  | .         | .        | . |
| .            | NA | . | RNA_MET  | NUCLEUS   | .        | .       | .         | .        | . |
| .            | NA | . | CELL_DE  | MEMBRAN   | PROTEIN_ | KEGG_AD | PID_BCR_  | BIOCART/ | . |
| .            | NA | . | .        | .         | .        | .       | .         | .        | . |
| .            | NA | . | .        | .         | .        | .       | .         | .        | . |
| .            | NA | . | .        | .         | .        | .       | .         | .        | . |
| .            | NA | . | .        | .         | .        | .       | .         | .        | . |
| .            | NA | . | .        | .         | .        | .       | .         | .        | . |
| .            | NA | . | .        | .         | .        | .       | .         | .        | . |
| .            | NA | . | .        | .         | .        | .       | .         | .        | . |
| .            | NA | . | .        | .         | .        | .       | .         | .        | . |
| .            | NA | . | .        | .         | .        | .       | .         | .        | . |
| .            | NA | . | ESTABLIS | INTRINSIC | CATION_T | KEGG_LY | PID_HIF2F | .        | . |
| Cognitive ii | NA | . | SYSTEM_  | INTRINSIC | .        | .       | .         | .        | . |
| .            | NA | . | MACROM   | CYTOPLA   | TRANSLA  | KEGG_MT | PID_MTOF  | BIOCART/ | . |
| .            | NA | . | RNA_MET  | .         | TRANSCR  | .       | .         | .        | . |
| .            | NA | . | NEGATIVE | ORGANEL   | PROTEIN_ | .       | PID_ATR_  | .        | . |
| Deafness,    | NA | . | SENSORY  | ORGANEL   | .        | .       | .         | .        | . |
| .            | NA | . | LIPID_ME | INTRINSIC | CATION_E | KEGG_AL | PID_AMB2  | .        | . |
| .            | NA | . | .        | .         | .        | .       | .         | .        | . |
| .            | NA | . | RNA_MET  | CYTOPLA   | RNA_POL  | .       | .         | .        | . |
| .            | NA | . | RNA_MET  | NUCLEOP   | TRANSCR  | KEGG_AN | PID_P53D  | .        | . |
| .            | NA | . | .        | .         | .        | .       | .         | .        | . |
| .            | NA | . | MACROM   | .         | .        | KEGG_AD | .         | BIOCART/ | . |
| .            | NA | . | .        | .         | .        | .       | .         | .        | . |
| .            | NA | . | .        | .         | .        | KEGG_AM | .         | .        | . |
| .            | NA | . | POSITIVE | .         | TRANSLA  | .       | .         | .        | . |
| .            | NA | . | .        | .         | .        | .       | .         | .        | . |
| .            | NA | . | .        | .         | .        | KEGG_W  | PID_WNT   | .        | . |
| Bleeding di  | NA | . | FOCAL_AI | ADHEREN   | INTEGRIN | KEGG_FO | PID_ILK_F | BIOCART/ | . |
| .            | NA | . | .        | .         | .        | .       | .         | .        | . |
| .            | NA | . | .        | .         | .        | .       | .         | .        | . |
| .            | NA | . | CELL_PR  | CYTOPLA   | CATION_E | .       | .         | .        | . |
| .            | NA | . | .        | .         | .        | .       | .         | .        | . |
| .            | NA | . | .        | .         | .        | .       | .         | .        | . |
| .            | NA | . | .        | .         | .        | .       | .         | .        | . |
| .            | NA | . | .        | .         | .        | .       | .         | .        | . |
| .            | NA | . | NUCLEOP  | .         | .        | .       | PID_ATM   | .        | . |
| .            | NA | . | .        | .         | .        | PHOSPHC | KEGG_GA   | .        | . |





|              |    |   |            |                  |             |                   |            |          |
|--------------|----|---|------------|------------------|-------------|-------------------|------------|----------|
| .            | NA | . | .          | .                | KEGG_P5:    | .                 |            |          |
| .            | NA | . | .          | .                | .           | .                 |            |          |
| .            | NA | . | BIOPOLYM   | PROTEIN_PROTEIN_ | PID_RB_1    | BIOCART/          |            |          |
| Ichthyosis,  | NA | . | LIPID_CA1  | VESICULA         | HYDROLA     | KEGG_ST .         |            |          |
| .            | NA | . | .          | .                | .           | .                 |            |          |
| .            | NA | . | .          | CYTOPLA:         | HYDROLA     | KEGG_RIC .        |            |          |
| .            | NA | . | RNA_MET .  | TRANSCR          | KEGG_MA     | PID_BCR_ BIOCART/ |            |          |
| Congenital   | NA | . | ESTABLIS . | SUBSTRA .        | .           | .                 |            |          |
| .            | NA | . | .          | .                | .           | .                 |            |          |
| .            | NA | . | SIGNAL_T   | NON_MEM          | KINASE_B .  | .                 |            |          |
| .            | NA | . | .          | .                | .           | .                 |            |          |
| Mental retar | NA | . | .          | ORGANEL          | CATION_T    | KEGG_CA .         |            |          |
| .            | NA | . | .          | .                | KEGG_AX .   | .                 |            |          |
| Axenfeld-R   | NA | . | SYSTEM_    | ORGANEL          | SEQUENC .   | .                 |            |          |
| Osteogene    | NA | . | RESPONS    | CYTOPLA:         | PROTEAS .   | .                 |            |          |
| .            | NA | . | .          | .                | .           | .                 |            |          |
| .            | NA | . | .          | .                | KEGG_GL .   | .                 |            |          |
| .            | NA | . | .          | .                | .           | .                 |            |          |
| .            | NA | . | .          | .                | .           | .                 |            |          |
| .            | NA | . | .          | .                | .           | .                 |            |          |
| .            | NA | . | .          | .                | .           | .                 |            |          |
| .            | NA | . | .          | .                | .           | .                 |            |          |
| .            | NA | . | .          | .                | .           | .                 |            |          |
| .            | NA | . | .          | .                | .           | .                 |            |          |
| .            | NA | . | .          | .                | .           | .                 |            |          |
| .            | NA | . | .          | CYTOPLA:         | .           | PID_MTOF .        |            |          |
| .            | NA | . | .          | .                | .           | .                 |            |          |
| .            | NA | . | SYSTEM_    | .                | .           | .                 |            |          |
| .            | NA | . | .          | .                | .           | .                 |            |          |
| .            | NA | . | CELL_DE\   | CYTOPLA:         | NUCLEOT     | KEGG_MA           | PID_P38G . |          |
| Pontocerelet | NA | . | BIOPOLYM   | CYTOPLA:         | RNA_BIN     | KEGG_AM .         |            |          |
| .            | NA | . | ESTABLIS   | MEMBRAN          | LIPID_BIN . | PID_ARF6          | BIOCART/   |          |
| .            | NA | . | .          | .                | .           | .                 | .          |          |
| .            | NA | . | .          | .                | .           | .                 | .          |          |
| .            | NA | . | RNA_MET .  | HYDROLA .        | PID_HDAC .  | .                 | .          |          |
| .            | NA | . | .          | .                | .           | .                 | .          |          |
| .            | NA | . | GLUCOSE    | CYTOPLA:         | PHOSPHC     | KEGG_T_()         | .          |          |
| .            | NA | . | .          | .                | KEGG_INC .  | BIOCART/          | .          |          |
| .            | NA | . | DNA_MET    | NUCLEUS          | NUCLEOT     | KEGG_PU .         | .          |          |
| Adrenal co   | NA | . | REGULAT    | NUCLEOP          | NUCLEOT     | KEGG_MA           | PID_HDAC   | BIOCART/ |
| Progressiv   | NA | . | .          | .                | .           | .                 | .          | .        |
| .            | NA | . | .          | CELL_FR          | .           | .                 | .          | .        |
| Mental retar | NA | . | .          | MEMBRAN          | CATION_T    | KEGG_MA .         | .          | .        |
| {Diabetes r  | NA | . | BIOSYNT    | CYTOPLA:         | RNA_BIN     | .                 | .          | .        |
| .            | NA | . | SYSTEM_    | ORGANEL .        | .           | .                 | .          | .        |
| .            | NA | . | .          | .                | .           | .                 | .          | .        |
| .            | NA | . | .          | .                | .           | .                 | .          | .        |
| Acne inver   | NA | . | GLYCOPR    | INTRINSIC .      | KEGG_NC     | PID_NOTC .        | .          | .        |
| .            | NA | . | .          | .                | .           | .                 | .          | .        |
| Mitochondi   | NA | . | .          | .                | .           | .                 | .          | .        |
| .            | NA | . | SYSTEM_    | .                | ACTIN_BI    | .                 | .          | .        |
| .            | NA | . | SYSTEM_    | INTRINSIC        | TRANSME .   | .                 | .          | .        |
| .            | NA | . | .          | .                | .           | .                 | .          | .        |

|             |    |   |           |           |            |           |
|-------------|----|---|-----------|-----------|------------|-----------|
| .           | NA | . | .         | .         | KEGG_PU.   | .         |
| .           | NA | . | CELL_REC. | .         | .          | .         |
| .           | NA | . | ISOPREN.  | OXIDOREI  | KEGG_RE.   | .         |
| .           | NA | . | .         | .         | .          | .         |
| .           | NA | . | .         | .         | .          | .         |
| .           | NA | . | .         | .         | .          | .         |
| .           | NA | . | .         | STRUCTU.  | PID_PLK1.  | .         |
| .           | NA | . | .         | .         | .          | .         |
| .           | NA | . | INTRINSIC | RECEPTO.  | .          | .         |
| .           | NA | . | .         | .         | PID_CDC4.  | .         |
| Leber conç  | NA | . | .         | .         | .          | .         |
| Myeloid let | NA | . | RNA_MET.  | RNA_POL.  | PID_SMAE.  | .         |
| .           | NA | . | .         | .         | .          | .         |
| .           | NA | . | .         | .         | .          | .         |
| Knobloch s  | NA | . | SYSTEM_   | PROTEIN/. | PID_INTEC. | .         |
| .           | NA | . | .         | .         | .          | .         |
| .           | NA | . | MULTICEL. | .         | PID_SMAE.  | .         |
| .           | NA | . | .         | .         | .          | .         |
| .           | NA | . | SIGNAL_T. | RECEPTO.  | PID_ANGI.  | .         |
| .           | NA | . | CELL_DE\  | CYTOPLA\  | ACID_AMI   | KEGG_UB   |
| .           | NA | . | .         | .         | PID_CD40   | BIOCART/  |
| .           | NA | . | .         | .         | .          | .         |
| .           | NA | . | NUCLEOP.  | KEGG_TIC. | .          | .         |
| .           | NA | . | .         | .         | .          | .         |
| Leiomyom    | NA | . | .         | .         | KEGG_FO    | PID_INTEC |
| .           | NA | . | .         | .         | .          | BIOCART/  |
| .           | NA | . | .         | .         | .          | .         |
| .           | NA | . | .         | .         | PID_BMPF.  | .         |

REACTOME\_PATHWAY

.  
REACTOME\_COSTIMULATION\_BY\_THE\_CD28\_FAMILY;REACTOME\_CTLA4\_INHIBITORY\_SIGN

.

.

.

REACTOME\_SIGNALING\_BY\_GPCR;REACTOME\_OLFACTORY\_SIGNALING\_PATHWAY;REACT

.

.

REACTOME\_METABOLISM\_OF\_AMINO\_ACIDS\_AND\_DERIVATIVES;REACTOME\_BRANCHED\_I

.

REACTOME\_VEGF\_LIGAND\_RECEPTOR\_INTERACTIONS

REACTOME\_CELL\_CELL\_COMMUNICATION;REACTOME\_RESPONSE\_TO\_ELEVATED\_PLATEI

.

REACTOME\_PROCESSING\_OF\_CAPPED\_INTRON\_CONTAINING\_PRE\_MRNA;REACTOME\_MR

.

.

.

.

.

.

.

.

.

.

REACTOME\_IMMUNE\_SYSTEM;REACTOME\_ADAPTIVE\_IMMUNE\_SYSTEM;REACTOME\_CLAS

.

.

.

.

REACTOME\_EXTRACELLULAR\_MATRIX\_ORGANIZATION;REACTOME\_COLLAGEN\_FORMATIC

REACTOME\_CYTOSOLIC\_TRNA\_AMINOACYLATION;REACTOME\_TRNA\_AMINOACYLATION

REACTOME\_SIGNALING\_BY\_RHO\_GTPASES;REACTOME\_DEVELOPMENTAL\_BIOLOGY;REAC

REACTOME\_SIGNALLING\_BY\_NGF;REACTOME\_SIGNALING\_BY\_ERBB4;REACTOME\_NUCLEA

REACTOME\_IMMUNE\_SYSTEM;REACTOME\_ADAPTIVE\_IMMUNE\_SYSTEM;REACTOME\_CLAS

.

.

REACTOME\_CS\_DS\_DEGRADATION;REACTOME\_CHONDROITIN\_SULFATE\_BIOSYNTHESIS;F

REACTOME\_DIABETES\_PATHWAYS;REACTOME\_REGULATION\_OF\_INSULIN\_LIKE\_GROWTH

.

REACTOME\_PROCESSING\_OF\_CAPPED\_INTRON\_CONTAINING\_PRE\_MRNA;REACTOME\_MR

REACTOME\_DEVELOPMENTAL\_BIOLOGY;REACTOME\_TCR\_SIGNALING;REACTOME\_PHOSPI

.

REACTOME\_G0\_AND\_EARLY\_G1;REACTOME\_CELL\_CYCLE;REACTOME\_CELL\_CYCLE\_MITO

.

.

.

REACTOME\_DEVELOPMENTAL\_BIOLOGY;REACTOME\_SIGNALING\_BY\_GPCR;REACTOME\_A)  
. . .  
REACTOME\_METABOLISM\_OF\_PROTEINS;REACTOME\_POST\_TRANSLATIONAL\_MODIFICATI  
. . .  
REACTOME\_DEVELOPMENTAL\_BIOLOGY;REACTOME\_SIGNALING\_BY\_NODAL;REACTOME\_Σ  
. . .  
REACTOME\_TRIF\_MEDIATED\_TLR3\_SIGNALING;REACTOME\_MAP\_KINASE\_ACTIVATION\_IN\_  
REACTOME\_SIGNALING\_BY\_GPCR;REACTOME\_GPCR\_DOWNSTREAM\_SIGNALING;REACTO  
. . .  
REACTOME\_SIGNALING\_BY\_SCF\_KIT;REACTOME\_GROWTH\_HORMONE\_RECEPTOR\_SIGNA  
. . .  
REACTOME\_DEVELOPMENTAL\_BIOLOGY;REACTOME\_AXON\_GUIDANCE;REACTOME\_SEMAI  
REACTOME\_DEVELOPMENTAL\_BIOLOGY;REACTOME\_AXON\_GUIDANCE;REACTOME\_L1CAM  
. . .  
REACTOME\_SYNTHESIS\_OF\_PIPS\_AT\_THE\_GOLGI\_MEMBRANE;REACTOME\_PHOSPHOLIPII  
. . .  
REACTOME\_APOPTOTIC\_CLEAVAGE\_OF\_CELLULAR\_PROTEINS;REACTOME\_SIGNALLING\_E  
. . .  
REACTOME\_GLYCOGEN\_BREAKDOWN\_GLYCOGENOLYSIS;REACTOME\_METABOLISM\_OF\_C  
. . .  
REACTOME\_SIGNALING\_BY\_ERBB4;REACTOME\_SIGNALING\_BY\_ERBB2;REACTOME\_SIGNALI



REACTOME\_TRANSMISSION\_ACROSS\_CHEMICAL\_SYNAPSES;REACTOME\_NEURONAL\_SYS  
REACTOME\_PTM\_GAMMA\_CARBOXYLATION\_HYPUSINE\_FORMATION\_AND\_ARYLSULFATAS

.

.

.

.

REACTOME\_SIGNALING\_BY\_RHO\_GTPASES;REACTOME\_SIGNALLING\_BY\_NGF;REACTOME\_

.

.

.

.

.

REACTOME\_MEMBRANE\_TRAFFICKING;REACTOME\_TRANS\_GOLGI\_NETWORK\_VESICLE\_BI

.

.

.

REACTOME\_DEVELOPMENTAL\_BIOLOGY;REACTOME\_AXON\_GUIDANCE;REACTOME\_NETRI

REACTOME\_DEVELOPMENTAL\_BIOLOGY;REACTOME\_AXON\_GUIDANCE;REACTOME\_NETRI

.

.

.

REACTOME\_TRIF\_MEDIATED\_TLR3\_SIGNALING;REACTOME\_RIP\_MEDIATED\_NFKB\_ACTIVAT

.

REACTOME\_MHC\_CLASS\_II\_ANTIGEN\_PRESENTATION;REACTOME\_IMMUNE\_SYSTEM;REAC

.

.

.

.

.

REACTOME\_TRANSMISSION\_ACROSS\_CHEMICAL\_SYNAPSES;REACTOME\_NEURONAL\_SYS

.

REACTOME\_AMINO\_ACID\_TRANSPORT\_ACROSS\_THE\_PLASMA\_MEMBRANE;REACTOME\_TI

.

.

.

.

.

.

REACTOME\_MEMBRANE\_TRAFFICKING;REACTOME\_TRANS\_GOLGI\_NETWORK\_VESICLE\_BI

.

.

.

.

.

.

REACTOME\_TRIF\_MEDIATED\_TLR3\_SIGNALING;REACTOME\_TAK1\_ACTIVATES\_NFKB\_BY\_PI

REACTOME\_TRIF\_MEDIATED\_TLR3\_SIGNALING;REACTOME\_TAK1\_ACTIVATES\_NFKB\_BY\_PI

.

.

.

.

REACTOME\_GENERIC\_TRANSCRIPTION\_PATHWAY

.

.

REACTOME\_SIGNALING\_BY\_FGFR\_IN\_DISEASE;REACTOME\_SIGNALING\_BY\_FGFR1\_MUTAN  
. . .  
REACTOME\_SIGNALING\_BY\_ERBB4;REACTOME\_DOWNREGULATION\_OF\_ERBB2\_ERBB3\_SI  
. . .  
REACTOME\_SIGNALING\_BY\_SCF\_KIT;REACTOME\_GROWTH\_HORMONE\_RECEPTOR\_SIGNA  
REACTOME\_NOTCH1\_INTRACELLULAR\_DOMAIN\_REGULATES\_TRANSCRIPTION;REACTOME  
. . .  
REACTOME\_DEVELOPMENTAL\_BIOLOGY;REACTOME\_NEURONAL\_SYSTEM;REACTOME\_AXI  
. . .  
REACTOME\_TCA\_CYCLE\_AND\_RESPIRATORY\_ELECTRON\_TRANSPORT;REACTOME\_MITOC  
. . .  
REACTOME\_DEVELOPMENTAL\_BIOLOGY;REACTOME\_RESPONSE\_TO\_ELEVATED\_PLATELE  
. . .  
REACTOME\_SIGNALING\_BY\_GPCR;REACTOME\_CLASS\_B\_2\_SECRETIN\_FAMILY\_RECEPTOR  
REACTOME\_SIGNALING\_BY\_GPCR;REACTOME\_CLASS\_B\_2\_SECRETIN\_FAMILY\_RECEPTOR  
. . .  
REACTOME\_SIGNALING\_BY\_GPCR;REACTOME\_OLFACTORY\_SIGNALING\_PATHWAY;REACT  
. . .  
REACTOME\_MITOCHONDRIAL\_PROTEIN\_IMPORT;REACTOME\_METABOLISM\_OF\_PROTEINS  
. . .  
REACTOME\_TRANSMISSION\_ACROSS\_CHEMICAL\_SYNAPSES;REACTOME\_NEURONAL\_SYS  
. . .  
REACTOME\_FACTORS\_INVOLVED\_IN\_MEGAKARYOCYTE\_DEVELOPMENT\_AND\_PLATELET\_  
. . .  
REACTOME\_EXTRACELLULAR\_MATRIX\_ORGANIZATION;REACTOME\_COLLAGEN\_FORMATIC  
. . .  
REACTOME\_INTERFERON\_ALPHA\_BETA\_SIGNALING;REACTOME\_INTERFERON\_SIGNALING  
. . .  
REACTOME\_SIGNALING\_BY\_GPCR;REACTOME\_OLFACTORY\_SIGNALING\_PATHWAY;REACT

.  
. .  
REACTOME\_O\_LINKED\_GLYCOSYLATION\_OF\_MUCINS;REACTOME\_TERMINATION\_OF\_O\_GI  
REACTOME\_TRIGLYCERIDE\_BIOSYNTHESIS;REACTOME\_FATTY\_ACYL\_COA\_BIOSYNTHESIS

.  
REACTOME\_SIGNALLING\_BY\_NGF;REACTOME\_DAG\_AND\_IP3\_SIGNALING;REACTOME\_SIGM

.  
REACTOME\_CELL\_SURFACE\_INTERACTIONS\_AT\_THE\_VASCULAR\_WALL;REACTOME\_INTEC

.  
REACTOME\_O\_LINKED\_GLYCOSYLATION\_OF\_MUCINS;REACTOME\_METABOLISM\_OF\_PROT

.  
REACTOME\_SIGNALING\_BY\_SCF\_KIT;REACTOME\_GROWTH\_HORMONE\_RECEPTOR\_SIGNA

.  
REACTOME\_O\_LINKED\_GLYCOSYLATION\_OF\_MUCINS;REACTOME\_TERMINATION\_OF\_O\_GI

.  
REACTOME\_DEVELOPMENTAL\_BIOLOGY;REACTOME\_AXON\_GUIDANCE;REACTOME\_L1CAM  
REACTOME\_TRANSLATION;REACTOME\_INSULIN\_RECEPTOR\_SIGNALLING\_CASCADE;REAC

.  
REACTOME\_PPARA\_ACTIVATES\_GENE\_EXPRESSION;REACTOME\_DIABETES\_PATHWAYS;R

.  
REACTOME\_MITOCHONDRIAL\_TRNA\_AMINOACYLATION;REACTOME\_TRNA\_AMINOACYLATI

.  
REACTOME\_CELL\_CELL\_COMMUNICATION;REACTOME\_RESPONSE\_TO\_ELEVATED\_PLATEL

.  
REACTOME\_HOMOLOGOUS\_RECOMBINATION\_REPAIR\_OF\_REPLICATION\_INDEPENDENT\_I

.  
.  
REACTOME\_DEVELOPMENTAL\_BIOLOGY;REACTOME\_AXON\_GUIDANCE;REACTOME\_MYOG

.  
.  
.  
.  
.  
REACTOME\_SIGNALING\_BY\_SCF\_KIT;REACTOME\_DEVELOPMENTAL\_BIOLOGY;REACTOME\_

.  
.  
.  
.  
.  
.  
REACTOME\_SIGNALLING\_BY\_NGF;REACTOME\_DAG\_AND\_IP3\_SIGNALING;REACTOME\_SIG  
REACTOME\_CELL\_CELL\_COMMUNICATION;REACTOME\_ADHERENS\_JUNCTIONS\_INTERACT

.  
REACTOME\_CELL\_SURFACE\_INTERACTIONS\_AT\_THE\_VASCULAR\_WALL;REACTOME\_BASIK

.  
.  
.  
.  
.  
REACTOME\_NEURONAL\_SYSTEM;REACTOME\_VOLTAGE\_GATED\_POTASSIUM\_CHANNELS;F  
REACTOME\_DEVELOPMENTAL\_BIOLOGY;REACTOME\_AXON\_GUIDANCE;REACTOME\_SEMA4

.  
.  
.  
REACTOME\_SIGNALING\_BY\_SCF\_KIT;REACTOME\_GROWTH\_HORMONE\_RECEPTOR\_SIGNA

.  
.  
.  
REACTOME\_STRIATED\_MUSCLE\_CONTRACTION;REACTOME\_MUSCLE\_CONTRACTION

.  
.  
.  
.  
.  
.  
.  
.  
.  
REACTOME\_RNA\_POL\_II\_TRANSCRIPTION;REACTOME\_RNA\_POL\_II\_TRANSCRIPTION\_PRE\_

.  
.  
.  
REACTOME\_SIGNALING\_BY\_BMP;REACTOME\_DOWNREGULATION\_OF\_TGF\_BETA\_RECEPT

.  
. .  
. .  
REACTOME\_PROCESSING\_OF\_CAPPED\_INTRON\_CONTAINING\_PRE\_MRNA;REACTOME\_RN  
REACTOME\_IMMUNOREGULATORY\_INTERACTIONS\_BETWEEN\_A\_LYMPHOID\_AND\_A\_NON  
. .  
REACTOME\_IL\_7\_SIGNALING;REACTOME\_SIGNALING\_BY\_ILS;REACTOME\_IL\_3\_5\_AND\_GM  
. .  
REACTOME\_IMMUNE\_SYSTEM;REACTOME\_ADAPTIVE\_IMMUNE\_SYSTEM;REACTOME\_CLAS  
. .  
REACTOME\_GENERIC\_TRANSCRIPTION\_PATHWAY  
. .  
. .  
. .  
. .  
. .  
REACTOME\_METABOLISM\_OF\_NON\_CODING\_RNA;REACTOME\_PROCESSING\_OF\_CAPPED\_  
. .  
REACTOME\_APOPTOSIS;REACTOME\_INTRINSIC\_PATHWAY\_FOR\_APOPTOSIS  
REACTOME\_DEVELOPMENTAL\_BIOLOGY;REACTOME\_TRANSMISSION\_ACROSS\_CHEMICAL  
. .  
REACTOME\_IMMUNOREGULATORY\_INTERACTIONS\_BETWEEN\_A\_LYMPHOID\_AND\_A\_NON  
. .  
REACTOME\_IMMUNE\_SYSTEM;REACTOME\_ADAPTIVE\_IMMUNE\_SYSTEM;REACTOME\_CLAS  
. .  
. .  
. .  
REACTOME\_BIOLOGICAL\_OXIDATIONS;REACTOME\_PHASE1\_FUNCTIONALIZATION\_OF\_COM  
. .  
. .  
REACTOME\_DEVELOPMENTAL\_BIOLOGY;REACTOME\_NEURONAL\_SYSTEM;REACTOME\_AXI  
. .  
REACTOME\_METABOLISM\_OF\_AMINO\_ACIDS\_AND\_DERIVATIVES  
. .  
. .  
. .  
. .  
. .  
. .

.  
. REACTOME\_CELL\_CYCLE;REACTOME\_CELL\_CYCLE\_MITOTIC;REACTOME\_G1\_PHASE;REAC  
REACTOME\_PTM\_GAMMA\_CARBOXYLATION\_HYPUSINE\_FORMATION\_AND\_ARYLSULFATAS

.  
. REACTOME\_SIGNALLING\_BY\_NGF;REACTOME\_TRIF\_MEDIATED\_TLR3\_SIGNALING;REACTO  
REACTOME\_TRANSMEMBRANE\_TRANSPORT\_OF\_SMALL\_MOLECULES;REACTOME\_SLC\_ME

.  
. REACTOME\_TRANSMEMBRANE\_TRANSPORT\_OF\_SMALL\_MOLECULES;REACTOME\_SLC\_ME  
REACTOME\_DEVELOPMENTAL\_BIOLOGY;REACTOME\_AXON\_GUIDANCE;REACTOME\_OTHEI

. REACTOME\_EXTRACELLULAR\_MATRIX\_ORGANIZATION;REACTOME\_COLLAGEN\_FORMATIC

.  
. REACTOME\_NEURONAL\_SYSTEM;REACTOME\_VOLTAGE\_GATED\_POTASSIUM\_CHANNELS;F

.  
. REACTOME\_PYRUVATE\_METABOLISM\_AND\_CITRIC\_ACID\_TCA\_CYCLE;REACTOME\_TCA\_C)  
REACTOME\_PHOSPHOLIPID\_METABOLISM;REACTOME\_SYNTHESIS\_OF\_PIPS\_AT\_THE\_PLA:  
REACTOME\_ACTIVATION\_OF\_THE\_PRE\_REPLICATIVE\_COMPLEX;REACTOME\_CELL\_CYCLE  
REACTOME\_CELL\_CYCLE;REACTOME\_PRE\_NOTCH\_TRANSCRIPTION\_AND\_TRANSLATION;f

.  
. REACTOME\_TRANSMISSION\_ACROSS\_CHEMICAL\_SYNAPSES;REACTOME\_NEURONAL\_SYS  
REACTOME\_DIABETES\_PATHWAYS

.  
. REACTOME\_SIGNALLING\_BY\_NGF;REACTOME\_SIGNALING\_BY\_ERBB4;REACTOME\_NUCLEA

.  
.  
REACTOME\_METABOLISM\_OF\_STEROID\_HORMONES\_AND\_VITAMINS\_A\_AND\_D;REACTOMI

.  
.  
.  
.  
.  
.  
.  
REACTOME\_FACTORS\_INVOLVED\_IN\_MEGAKARYOCYTE\_DEVELOPMENT\_AND\_PLATELET\_

.  
.  
.  
.  
.  
.  
.  
REACTOME\_CELL\_CYCLE;REACTOME\_CHROMOSOME\_MAINTENANCE;REACTOME\_DEPOSI

.  
REACTOME\_CELL\_SURFACE\_INTERACTIONS\_AT\_THE\_VASCULAR\_WALL;REACTOME\_TIE2\_  
REACTOME\_INNATE\_IMMUNE\_SYSTEM;REACTOME\_IMMUNE\_SYSTEM;REACTOME\_NOD1\_2

.  
.  
REACTOME\_GENERIC\_TRANSCRIPTION\_PATHWAY

.  
REACTOME\_EXTRACELLULAR\_MATRIX\_ORGANIZATION;REACTOME\_COLLAGEN\_FORMATIC  
REACTOME\_FACTORS\_INVOLVED\_IN\_MEGAKARYOCYTE\_DEVELOPMENT\_AND\_PLATELET\_  
.  
REACTOME\_DEVELOPMENTAL\_BIOLOGY;REACTOME\_AXON\_GUIDANCE;REACTOME\_NETRI

JALING;REACTOME\_IMMUNE\_SYSTEM;REACTOME\_ADAPTIVE\_IMMUNE\_SYSTEM

OME\_GPCR\_DOWNSTREAM\_SIGNALING

CHAIN\_AMINO\_ACID\_CATABOLISM

.ET\_CYTOSOLIC\_CA2\_;REACTOME\_CELL\_EXTRACELLULAR\_MATRIX\_INTERACTIONS;REACT

:NA\_PROCESSING;REACTOME\_MRNA\_SPLICING

S\_I\_MHC\_MEDIATED\_ANTIGEN\_PROCESSING\_PRESENTATION;REACTOME\_ANTIGEN\_PROC

ON

;TOME\_SIGNALING\_BY\_GPCR;REACTOME\_AXON\_GUIDANCE;REACTOME\_G\_ALPHA1213\_SIG  
R\_SIGNALING\_BY\_ERBB4;REACTOME\_ACTIVATED\_NOTCH1\_TRANSMITS\_SIGNAL\_TO\_THE\_  
S\_I\_MHC\_MEDIATED\_ANTIGEN\_PROCESSING\_PRESENTATION;REACTOME\_ANTIGEN\_PROC

REACTOME\_CHONDROITIN\_SULFATE\_DERMATAN\_SULFATE\_METABOLISM;REACTOME\_HEP,  
\_FACTOR\_IGF\_ACTIVITY\_BY\_INSULIN\_LIKE\_GROWTH\_FACTOR\_BINDING\_PROTEINS\_IGFBP

:NA\_PROCESSING;REACTOME\_MRNA\_SPLICING

HORYLATION\_OF\_CD3\_AND\_TCR\_ZETA\_CHAINS;REACTOME\_AXON\_GUIDANCE;REACTOME\_

TIC;REACTOME\_MITOTIC\_G1\_G1\_S\_PHASES



ON\_GUIDANCE;REACTOME\_G\_ALPHA1213\_SIGNALLING\_EVENTS;REACTOME\_GPCR\_DOWN

ON\_SYNTHESIS\_OF\_GPI\_ANCHORED\_PROTEINS;REACTOME\_POST\_TRANSLATIONAL\_PRO

SIGNALING\_BY\_BMP

TLR\_CASCADE;REACTOME\_ACTIVATION\_OF\_THE\_AP1\_FAMILY\_OF\_TRANSCRIPTION\_FACTO  
ME\_G\_ALPHA\_S\_SIGNALLING\_EVENTS;REACTOME\_CGMP\_EFFECTS;REACTOME\_NITRIC\_O

LING;REACTOME\_ANTIVIRAL\_MECHANISM\_BY\_IFN\_STIMULATED\_GENES;REACTOME\_SIGN

PHORIN\_INTERACTIONS;REACTOME\_SEMA3A\_PLEXIN\_REPULSION\_SIGNALING\_BY\_INHIBITI  
1\_INTERACTIONS

)\_METABOLISM;REACTOME\_PI\_METABOLISM;REACTOME\_METABOLISM\_OF\_LIPIDS\_AND\_LI

BY\_NGF;REACTOME\_DAG\_AND\_IP3\_SIGNALING;REACTOME\_SIGNALING\_BY\_ERBB2;REACTO

SARBOHYDRATES;REACTOME\_GLUCOSE\_METABOLISM

LING\_BY\_CONSTITUTIVELY\_ACTIVE\_EGFR;REACTOME\_GRB2\_EVENTS\_IN\_ERBB2\_SIGNALIN

ITEM;REACTOME\_NEUROTRANSMITTER\_RECEPTOR\_BINDING\_AND\_DOWNSTREAM\_TRANS  
E\_ACTIVATION;REACTOME\_GLYCOSPHINGOLIPID\_METABOLISM;REACTOME\_PHOSPHOLIPI

\_DEVELOPMENTAL\_BIOLOGY;REACTOME\_GASTRIN\_CREB\_SIGNALLING\_PATHWAY\_VIA\_PKC

JDDING;REACTOME\_GOLGI\_ASSOCIATED\_VESICLE\_BIOGENESIS

N1\_SIGNALING  
N1\_SIGNALING

TION\_VIA\_DAI;REACTOME\_TAK1\_ACTIVATES\_NFKB\_BY\_PHOSPHORYLATION\_AND\_ACTIVATI  
;TOME\_ADAPTIVE\_IMMUNE\_SYSTEM

ITEM;REACTOME\_NEUROTRANSMITTER\_RECEPTOR\_BINDING\_AND\_DOWNSTREAM\_TRANS  
RANSMEMBRANE\_TRANSPORT\_OF\_SMALL\_MOLECULES;REACTOME\_SLC\_MEDIATED\_TRAN

JDDING;REACTOME\_GOLGI\_ASSOCIATED\_VESICLE\_BIOGENESIS

HOSPHORYLATION\_AND\_ACTIVATION\_OF\_IKKS\_COMPLEX;REACTOME\_MAP\_KINASE\_ACTIV  
HOSPHORYLATION\_AND\_ACTIVATION\_OF\_IKKS\_COMPLEX;REACTOME\_MAP\_KINASE\_ACTIV

ITS;REACTOME\_SIGNALING\_BY\_FGFR1\_FUSION\_MUTANTS;REACTOME\_SIGNALING\_BY\_FGI

GNALING;REACTOME\_SIGNALING\_BY\_ERBB2;REACTOME\_GRB2\_EVENTS\_IN\_ERBB2\_SIGNA  
LING;REACTOME\_REGULATION\_OF\_KIT\_SIGNALING;REACTOME\_ANTIGEN\_ACTIVATES\_B\_C  
: SIGNALING\_BY\_NOTCH1;REACTOME\_SIGNALING\_BY\_NOTCH

ON\_GUIDANCE;REACTOME\_L1CAM\_INTERACTIONS;REACTOME\_INTERACTION\_BETWEEN\_L  
:HONDRIAL\_PROTEIN\_IMPORT;REACTOME\_METABOLISM\_OF\_PROTEINS;REACTOME\_RESPI

T\_CYTOSOLIC\_CA2\_;REACTOME\_INTEGRIN\_CELL\_SURFACE\_INTERACTIONS;REACTOME\_D

S;REACTOME\_GPCR\_LIGAND\_BINDING  
S;REACTOME\_GPCR\_LIGAND\_BINDING

OME\_GPCR\_DOWNSTREAM\_SIGNALING

TEM;REACTOME\_NEUROTRANSMITTER\_RELEASE\_CYCLE;REACTOME\_GABA\_SYNTHESIS\_F

PRODUCTION;REACTOME\_HEMOSTASIS

ON

;REACTOME\_IMMUNE\_SYSTEM;REACTOME\_CYTOKINE\_SIGNALING\_IN\_IMMUNE\_SYSTEM

OME\_GPCR\_DOWNSTREAM\_SIGNALING

LYCAN\_BIOSYNTHESIS;REACTOME\_METABOLISM\_OF\_PROTEINS;REACTOME\_POST\_TRANS  
S;REACTOME\_METABOLISM\_OF\_LIPIDS\_AND\_LIPOPROTEINS;REACTOME\_FATTY\_ACID\_TRIA

IGNALING\_BY\_ERBB2;REACTOME\_SIGNALING\_BY\_EGFR\_IN\_CANCER;REACTOME\_NGF\_SIGNAL

3RIN\_CELL\_SURFACE\_INTERACTIONS;REACTOME\_HEMOSTASIS

TEINS;REACTOME\_POST\_TRANSLATIONAL\_PROTEIN\_MODIFICATION

IGNALING;REACTOME\_CELL\_CELL\_COMMUNICATION;REACTOME\_REGULATION\_OF\_KIT\_SIGNAL

LYCAN\_BIOSYNTHESIS;REACTOME\_METABOLISM\_OF\_PROTEINS;REACTOME\_POST\_TRANS

1\_INTERACTIONS;REACTOME\_INTERACTION\_BETWEEN\_L1\_AND\_ANKYRINS  
TOME\_ACTIVATION\_OF\_THE\_MRNA\_UPON\_BINDING\_OF\_THE\_CAP\_BINDING\_COMPLEX\_AN

EACTOME\_PERK\_REGULATED\_GENE\_EXPRESSION;REACTOME\_ACTIVATION\_OF\_CHAPERON

ON

.ET\_CYTOSOLIC\_CA2\_;REACTOME\_CELL\_EXTRACELLULAR\_MATRIX\_INTERACTIONS;REACT

DOUBLE\_STRAND\_BREAKS;REACTOME\_DOUBLE\_STRAND\_BREAK\_REPAIR;REACTOME\_DNA

ENESIS;REACTOME\_NETRIN1\_SIGNALING

\_AXON\_GUIDANCE;REACTOME\_CRMPS\_IN\_SEMA3A\_SIGNALING;REACTOME\_SEMA3A\_PAK\_

JALING\_BY\_ERBB2;REACTOME\_SIGNALING\_BY\_EGFR\_IN\_CANCER;REACTOME\_NGF\_SIGNALI  
IONS;REACTOME\_CELL\_CELL\_JUNCTION\_ORGANIZATION;REACTOME\_CELL\_JUNCTION\_OF  
3IN\_INTERACTIONS;REACTOME\_AMINO\_ACID\_TRANSPORT\_ACROSS\_THE\_PLASMA\_MEMBF

REACTOME\_POTASSIUM\_CHANNELS  
4D\_IN\_SEMAPHORIN\_SIGNALING;REACTOME\_SEMAPHORIN\_INTERACTIONS;REACTOME\_SE

LING;REACTOME\_IL\_7\_SIGNALING;REACTOME\_SIGNALING\_BY\_ERBB4;REACTOME\_PROLAC

\_INITIATION\_AND\_PROMOTER\_OPENING;REACTOME\_TRANSCRIPTION;REACTOME\_RNA\_PO

OR\_SIGNALING;REACTOME\_SMAD2\_SMAD3\_SMAD4\_HETEROTRIMER\_REGULATES\_TRANSC

A\_POL\_II\_TRANSCRIPTION;REACTOME\_MRNA\_CAPPING;REACTOME\_RNA\_POL\_II\_TRANSCF  
\_LYMPHOID\_CELL;REACTOME\_REGULATION\_OF\_COMPLEMENT\_CASCADE;REACTOME\_SIGI

\_CSF\_SIGNALING;REACTOME\_IL\_RECEPTOR\_SHC\_SIGNALING;REACTOME\_IL\_2\_SIGNALING;

S\_I\_MHC\_MEDIATED\_ANTIGEN\_PROCESSING\_PRESENTATION;REACTOME\_ANTIGEN\_PROC

\_INTRON\_CONTAINING\_PRE\_MRNA;REACTOME\_MRNA\_PROCESSING;REACTOME\_MRNA\_SF

\_SYNAPSES;REACTOME\_NEURONAL\_SYSTEM;REACTOME\_NEUROTRANSMITTER\_RECEPTC

\_LYMPHOID\_CELL;REACTOME\_IMMUNE\_SYSTEM;REACTOME\_ADAPTIVE\_IMMUNE\_SYSTEM

S\_I\_MHC\_MEDIATED\_ANTIGEN\_PROCESSING\_PRESENTATION;REACTOME\_ANTIGEN\_PROC

/POUNDS;REACTOME\_ETHANOL\_OXIDATION

ON\_GUIDANCE;REACTOME\_L1CAM\_INTERACTIONS;REACTOME\_INTERACTION\_BETWEEN\_L

;TOME\_G1\_S\_TRANSITION;REACTOME\_MITOTIC\_G1\_G1\_S\_PHASES;REACTOME\_INHIBITION  
;E\_ACTIVATION;REACTOME\_GLYCOSPHINGOLIPID\_METABOLISM;REACTOME\_PHOSPHOLIPI

ME\_NGF\_SIGNALLING\_VIA\_TRKA\_FROM\_THE\_PLASMA\_MEMBRANE;REACTOME\_NUCLEAR\_  
EDIATED\_TRANSMEMBRANE\_TRANSPORT;REACTOME\_TRANSPORT\_OF\_VITAMINS\_NUCLEC

EDIATED\_TRANSMEMBRANE\_TRANSPORT;REACTOME\_TRANSPORT\_OF\_INORGANIC\_CATIO  
R\_SEMAPHORIN\_INTERACTIONS;REACTOME\_SEMAPHORIN\_INTERACTIONS

ON

REACTOME\_POTASSIUM\_CHANNELS

/CLE\_AND\_RESPIRATORY\_ELECTRON\_TRANSPORT;REACTOME\_REGULATION\_OF\_PYRUVA  
SMA\_MEMBRANE;REACTOME\_PI\_METABOLISM;REACTOME\_METABOLISM\_OF\_LIPIDS\_AND\_  
;REACTOME\_CELL\_CYCLE\_MITOTIC;REACTOME\_TRANSCRIPTION\_COUPLED\_NER\_TC\_NER  
REACTOME\_PRE\_NOTCH\_EXPRESSION\_AND\_PROCESSING;REACTOME\_CELL\_CYCLE\_CHEC

TEM;REACTOME\_NEUROTRANSMITTER\_RECEPTOR\_BINDING\_AND\_DOWNSTREAM\_TRANS

R\_SIGNALING\_BY\_ERBB4;REACTOME\_ACTIVATED\_NOTCH1\_TRANSMITS\_SIGNAL\_TO\_THE\_

E\_METABOLISM\_OF\_LIPIDS\_AND\_LIPOPROTEINS

PRODUCTION;REACTOME\_HEMOSTASIS

TION\_OF\_NEW\_CENPA\_CONTAINING\_NUCLEOSOMES\_AT\_THE\_CENTROMERE

\_SIGNALING;REACTOME\_HEMOSTASIS

\_SIGNALING\_PATHWAY;REACTOME\_NUCLEOTIDE\_BINDING\_DOMAIN\_LEUCINE\_RICH\_REPE

ON

PRODUCTION;REACTOME\_HEMOSTASIS

N1\_SIGNALING



ACTOME\_CELL\_JUNCTION\_ORGANIZATION;REACTOME\_NEPHRIN\_INTERACTIONS;REACTOME\_

IGNALING\_UBIQUITINATION\_PROTEASOME\_DEGRADATION

IGNALING\_EVENTS;REACTOME\_GPCR\_DOWNSTREAM\_SIGNALING;REACTOME\_SEMA4D\_IN\_NUCLEUS;REACTOME\_SIGNALING\_BY\_NOTCH4;REACTOME\_SIGNALING\_BY\_NOTCH2;REACTOME\_SIGNALING\_UBIQUITINATION\_PROTEASOME\_DEGRADATION

ARAN\_SULFATE\_HEPARIN\_HS\_GAG\_METABOLISM;REACTOME\_GLYCOSAMINOGLYCAN\_METABOLISM

\_SEMA4D\_IN\_SEMAPHORIN\_SIGNALING;REACTOME\_SEMAPHORIN\_INTERACTIONS;REACTOME\_

STREAM\_SIGNALING;REACTOME\_SEMA4D\_IN\_SEMAPHORIN\_SIGNALING;REACTOME\_SEM/

TEIN\_MODIFICATION;REACTOME\_SYNTHESIS\_OF\_GLYCOSYLPHOSPHATIDYLINOSITOL\_GPI

ORS;REACTOME\_MAPK\_TARGETS\_NUCLEAR\_EVENTS\_MEDIATED\_BY\_MAP\_KINASES;REAC  
XIDE\_STIMULATES\_GUANYLATE\_CYCLASE;REACTOME\_PLATELET\_HOMEOSTASIS;REACTOI

ALING\_BY\_FGFR\_IN\_DISEASE;REACTOME\_SIGNALING\_BY\_FGFR1\_MUTANTS;REACTOME\_SI

NG\_INTEGRIN\_ADHESION

POPROTEINS

ME\_SIGNALING\_BY\_EGFR\_IN\_CANCER;REACTOME\_NGF\_SIGNALLING\_VIA\_TRKA\_FROM\_TH

IG;REACTOME\_SIGNALING\_BY\_EGFR\_IN\_CANCER;REACTOME\_PI3K\_EVENTS\_IN\_ERBB2\_SIC

MISSION\_IN\_THE\_POSTSYNAPTIC\_CELL;REACTOME\_TRAFFICKING\_OF\_AMPA\_RECEPTORS  
D\_METABOLISM;REACTOME\_THE\_ACTIVATION\_OF\_ARYLSULFATASES;REACTOME\_METABO

C\_AND\_MAPK;REACTOME\_NRAGE\_SIGNALS\_DEATH\_THROUGH\_JNK;REACTOME\_CELL\_DEA

ION\_OF\_IKKS\_COMPLEX;REACTOME\_TRAF6\_MEDIATED\_NFKB\_ACTIVATION;REACTOME\_TR

MISSION\_IN\_THE\_POSTSYNAPTIC\_CELL;REACTOME\_ACTIVATION\_OF\_KAINATE\_RECEPTOR

ISMEMBRANE\_TRANSPORT;REACTOME\_TRANSPORT\_OF\_INORGANIC\_CATIONS\_ANIONS\_AI

'ATION\_IN\_TLR\_CASCADE;REACTOME\_JNK\_C\_JUN\_KINASES\_PHOSPHORYLATION\_AND\_AC'

'ATION\_IN\_TLR\_CASCADE;REACTOME\_JNK\_C\_JUN\_KINASES\_PHOSPHORYLATION\_AND\_AC'

FR\_MUTANTS

LING;REACTOME\_PI3K\_EVENTS\_IN\_ERBB4\_SIGNALING;REACTOME\_SHC1\_EVENTS\_IN\_ERB  
CELL\_RECEPTOR\_LEADING\_TO\_GENERATION\_OF\_SECOND\_MESSENGERS;REACTOME\_SIG

.1\_AND\_ANKYRINS;REACTOME\_VOLTAGE\_GATED\_POTASSIUM\_CHANNELS;REACTOME\_POT  
IRATORY\_ELECTRON\_TRANSPORT;REACTOME\_RESPIRATORY\_ELECTRON\_TRANSPORT\_A

IABETES\_PATHWAYS;REACTOME\_P130CAS\_LINKAGE\_TO\_MAPK\_SIGNALING\_FOR\_INTEGRI

RELEASE\_REUPTAKE\_AND\_DEGRADATION

ILATIONAL\_PROTEIN\_MODIFICATION  
CYLGLYCEROL\_AND\_KETONE\_BODY\_METABOLISM;REACTOME\_SYNTHESIS\_OF\_VERY\_LOM

LLING\_VIA\_TRKA\_FROM\_THE\_PLASMA\_MEMBRANE;REACTOME\_SIGNALING\_BY\_FGFR\_IN\_D

.ING;REACTOME\_CELL\_SURFACE\_INTERACTIONS\_AT\_THE\_VASCULAR\_WALL;REACTOME\_F

ILATIONAL\_PROTEIN\_MODIFICATION

D EIFS\_AND\_SUBSEQUENT\_BINDING\_TO\_43S;REACTOME\_METABOLISM\_OF\_PROTEINS;RE

ONES\_BY\_ATF6\_ALPHA;REACTOME\_ACTIVATION\_OF\_GENES\_BY\_ATF4;REACTOME\_UNFOLDI

OME\_CELL\_JUNCTION\_ORGANIZATION;REACTOME\_NEPHRIN\_INTERACTIONS;REACTOME\_

\_REPAIR

DEPENDENT\_AXON\_REPULSION;REACTOME\_SEMAPHORIN\_INTERACTIONS;REACTOME\_SE

LLING\_VIA\_TRKA\_FROM\_THE\_PLASMA\_MEMBRANE;REACTOME\_SIGNALING\_BY\_FGFR\_IN\_D  
ORGANIZATION

ANE;REACTOME\_TRANSMEMBRANE\_TRANSPORT\_OF\_SMALL\_MOLECULES;REACTOME\_SL

MA4D\_INDUCED\_CELL\_MIGRATION\_AND\_GROWTH\_CONE\_COLLAPSE

STIN\_RECEPTOR\_SIGNALING;REACTOME\_NUCLEAR\_SIGNALING\_BY\_ERBB4;REACTOME\_SIC

L\_II\_PRE\_TRANSCRIPTION\_EVENTS;REACTOME\_HIV\_INFECTION;REACTOME\_HIV\_LIFE\_CYC

SCRIPTION;REACTOME\_TGF\_BETA\_RECEPTOR\_SIGNALING\_ACTIVATES\_SMADS;REACTOME\_

RIPTION\_PRE\_INITIATION\_AND\_PROMOTER\_OPENING;REACTOME\_MRNA\_PROCESSING;RE/

;REACTOME\_IMMUNE\_SYSTEM;REACTOME\_CYTOKINE\_SIGNALING\_IN\_IMMUNE\_SYSTEM

:ESSING\_UBIQUITINATION\_PROTEASOME\_DEGRADATION

'LICING;REACTOME\_MRNA\_SPLICING\_MINOR\_PATHWAY;REACTOME\_METABOLISM\_OF\_RN/

OR\_BINDING\_AND\_DOWNSTREAM\_TRANSMISSION\_IN\_THE\_POSTSYNAPTIC\_CELL;REACTOM

:ESSING\_UBIQUITINATION\_PROTEASOME\_DEGRADATION

.1\_AND\_ANKYRINS;REACTOME\_VOLTAGE\_GATED\_POTASSIUM\_CHANNELS;REACTOME\_POT

\_OF\_REPLICATION\_INITIATION\_OF\_DAMAGED\_DNA\_BY\_RB1\_E2F1;REACTOME\_E2F\_MEDIATED\_METABOLISM;REACTOME\_THE\_ACTIVATION\_OF\_ARYLSULFATASES;REACTOME\_METABOLISM

EVENTS\_KINASE\_AND\_TRANSCRIPTION\_FACTOR\_ACTIVATION;REACTOME\_ERK\_MAPK\_TAFKINASES\_AND\_RELATED\_MOLECULES

IONS\_ANIONS\_AND\_AMINO\_ACIDS\_OLIGOPEPTIDES

ISOCITRATE\_DEHYDROGENASE\_PDH\_COMPLEX;REACTOME\_PYRUVATE\_METABOLISM  
LIPOPROTEINS  
;REACTOME\_M\_G1\_TRANSITION;REACTOME\_G1\_S\_TRANSITION;REACTOME\_NUCLEOTIDE\_CKPOINTS;REACTOME\_P53\_DEPENDENT\_G1\_DNA\_DAMAGE\_RESPONSE;REACTOME\_AUTOINFLAMMATION

MISSION\_IN\_THE\_POSTSYNAPTIC\_CELL;REACTOME\_TRAFFICKING\_OF\_AMPA\_RECEPTORS

IN\_THE\_NUCLEUS;REACTOME\_SIGNALING\_BY\_NOTCH4;REACTOME\_SIGNALING\_BY\_NOTCH2;REACTOME\_SIGNALING\_BY\_NOTCH1



AT\_CONTAINING\_RECEPTOR\_NLR\_SIGNALING\_PATHWAYS

HEMOSTASIS;REACTOME\_PLATELET\_ACTIVATION\_SIGNALING\_AND\_AGGREGATION

\_SEMAPHORIN\_SIGNALING;REACTOME\_SEMAPHORIN\_INTERACTIONS;REACTOME\_SEMA4D  
:TOME\_SIGNALING\_BY\_NOTCH1;REACTOME\_SIGNALING\_BY\_NOTCH3;REACTOME\_REGULA

TABOLISM;REACTOME\_A\_TETRASACCHARIDE\_LINKER\_SEQUENCE\_IS\_REQUIRED\_FOR\_GA

ME\_IMMUNE\_SYSTEM;REACTOME\_ADAPTIVE\_IMMUNE\_SYSTEM

APHORIN\_INTERACTIONS;REACTOME\_SEMA4D\_INDUCED\_CELL\_MIGRATION\_AND\_GROWTH

TOME\_CIRCADIAN\_CLOCK;REACTOME\_TRAF6\_MEDIATED\_INDUCTION\_OF\_NFKB\_AND\_MAP  
ME\_HEMOSTASIS

GNALING\_BY\_FGFR1\_FUSION\_MUTANTS;REACTOME\_SIGNALING\_BY\_FGFR\_MUTANTS;REA

IE\_PLASMA\_MEMBRANE;REACTOME\_SIGNALING\_BY\_FGFR\_IN\_DISEASE;REACTOME\_GASTF

IGNALING;REACTOME\_EGFR\_DOWNREGULATION;REACTOME\_GAB1\_SIGNALOSOME;REACTC

;REACTOME\_RAS\_ACTIVATION\_UOPN\_CA2\_INFUX\_THROUGH\_NMDA\_RECEPTOR;REACTOME  
METABOLISM\_OF\_PROTEINS;REACTOME\_SPHINGOLIPID\_METABOLISM;REACTOME\_POST\_TRANSLATIONAL

MODIFICATION\_OF\_PROTEINS;REACTOME\_TGFB\_SIGNALLING\_VIA\_NRAGE\_NRIF\_AND\_NADE;REACTOME\_P75\_NTR\_RECEPTOR\_MEDIATED

ACTIVATION\_OF\_TLR7\_8\_OR\_9;REACTOME\_TLR6\_MEDIATED\_INDUCION\_OF\_NFKB\_AND\_MAP\_KINASES\_UPON\_TLR7\_8\_OR\_9\_ACTIVATION

OF\_TLR7\_8\_OR\_9;REACTOME\_IONOTROPIC\_ACTIVITY\_OF\_KAINATE\_RECEPTORS\_UPON GLUTAMATE BINDING;REACTOME\_IONOTROPIC\_ACTIVITY\_OF\_KAINATE\_RECEPTORS

UPON\_AMINO\_ACIDS\_OLIGOPEPTIDES;REACTOME\_AMINO\_ACID\_AND\_OLIGOPEPTIDE\_TRANSPORT

BY\_ACTIVATED\_HUMAN\_TAK1;REACTOME\_ACTIVATED\_TAK1\_MEDIATED\_ACTIVATION\_OF\_TAK1;REACTOME\_ACTIVATED\_TAK1\_MEDIATED\_ACTIVATION\_OF\_TAK1

B4\_SIGNALING;REACTOME\_PI3K\_EVENTS\_IN\_ERBB2\_SIGNALING;REACTOME\_NUCLEAR\_SIGNALING\_BY\_THE\_B\_CELL\_RECEPTOR\_BCR;REACTOME\_CELL\_SURFACE\_INTERACTIONS\_A

ASSIUM\_CHANNELS

TP\_SYNTHESIS\_BY\_CHEMIOSMOTIC\_COUPLING\_AND\_HEAT\_PRODUCTION\_BY\_UNCOUPLIN

NS;REACTOME\_GRB2\_SOS\_PROVIDES\_LINKAGE\_TO\_MAPK\_SIGNALING\_FOR\_INTERGRINS\_

LONG\_CHAIN\_FATTY\_ACYL\_COA

DISEASE;REACTOME\_GASTRIN\_CREB\_SIGNALING\_PATHWAY\_VIA\_PKC\_AND\_MAPK;REACTO

PECAM1\_INTERACTIONS;REACTOME\_PD1\_SIGNALING;REACTOME\_COSTIMULATION\_BY\_THE

ACTOME\_3\_UTR\_MEDIATED\_TRANSLATIONAL\_REGULATION;REACTOME\_DEADENYLATION

DED\_PROTEIN\_RESPONSE;REACTOME\_ACTIVATION\_OF\_CHAPERONE\_GENES\_BY\_ATF6\_AL

HEMOSTASIS;REACTOME\_PLATELET\_ACTIVATION\_SIGNALING\_AND\_AGGREGATION

MA3A\_PLEXIN\_REPULSION\_SIGNALING\_BY\_INHIBITING\_INTEGRIN\_ADHESION

DISEASE;REACTOME\_TRANSMISSION\_ACROSS\_CHEMICAL\_SYNAPSES;REACTOME\_NEURON

.C\_MEDIATED\_TRANSMEMBRANE\_TRANSPORT;REACTOME\_TRANSPORT\_OF\_INORGANIC\_C

SIGNALING\_BY\_FGFR\_IN\_DISEASE;REACTOME\_SIGNALING\_BY\_FGFR1\_MUTANTS;REACTOME\_

LE;REACTOME\_LATE\_PHASE\_OF\_HIV\_LIFE\_CYCLE

.TRANSCRIPTIONAL\_ACTIVITY\_OF\_SMAD2\_SMAD3\_SMAD4\_HETEROTRIMER;REACTOME\_GE

ACTOME\_MRNA\_SPLICING;REACTOME\_MRNA\_SPLICING\_MINOR\_PATHWAY;REACTOME\_TR/

A

ME\_AXON\_GUIDANCE;REACTOME\_SEMA4D\_IN\_SEMAPHORIN\_SIGNALING;REACTOME\_SEMA

PASSIUM\_CHANNELS



REGULATION\_OF\_DNA\_REPLICATION  
METABOLISM\_OF\_PROTEINS;REACTOME\_SPHINGOLIPID\_METABOLISM;REACTOME\_POST\_TRANSL

ACTIVATION\_OF\_MAP\_KINASE\_TARGETS;REACTOME\_MAP\_KINASE\_ACTIVATION\_IN\_TLR\_CASCADE;REACTOME\_MAPK\_TARGET

EXCISION\_REPAIR;REACTOME\_REPAIR\_SYNTHESIS\_FOR\_GAP\_FILLING\_BY\_DNA\_POL\_IN\_T  
DEGRADATION\_OF\_THE\_E3\_UBIQUITIN\_LIGASE\_COP1;REACTOME\_FACTORS\_INVOLVED\_IN

SIGNALING\_BY\_NOTCH1;REACTOME\_SIGNALING\_BY\_NOTCH3;REACTOME\_REGULA



\_INDUCED\_CELL\_MIGRATION\_AND\_GROWTH\_CONE\_COLLAPSE  
TED\_PROTEOLYSIS\_OF\_P75NTR;REACTOME\_NRIF\_SIGNALS\_CELL\_DEATH\_FROM\_THE\_NUC

3\_SYNTHESIS;REACTOME\_METABOLISM\_OF\_CARBOHYDRATES

1\_CONE\_COLLAPSE

\_KINASES\_UPON\_TLR7\_8\_OR\_9\_ACTIVATION;REACTOME\_NFKB\_AND\_MAP\_KINASES\_ACTIV

CTOME\_SIGNALING\_BY\_PDGF;REACTOME\_DOWNSTREAM\_SIGNAL\_TRANSDUCTION;REACT

2IN\_CREB\_SIGNALLING\_PATHWAY\_VIA\_PKC\_AND\_MAPK;REACTOME\_SIGNALING\_BY\_GPCR

3ME\_SHC1\_EVENTS\_IN\_EGFR\_SIGNALING;REACTOME\_RESPONSE\_TO\_ELEVATED\_PLATELE

ME\_ACTIVATION\_OF\_NMDA\_RECEPTOR\_UPON\_Glutamate\_BINDING\_AND\_POSTSYNAPTIC  
ATIONAL\_PROTEIN\_MODIFICATION;REACTOME\_METABOLISM\_OF\_LIPIDS\_AND\_LIPOPROTEI

ED\_SIGNALLING;REACTOME\_SIGNALING\_BY\_GPCR;REACTOME\_AXON\_GUIDANCE;REACTOM

ON;REACTOME\_ADVANCED\_GLYCOSYLATION\_ENDPRODUCT\_RECEPTOR\_SIGNALING;REAC

ORS

TRANSPORTERS

TES\_P38\_MAPK\_ACTIVATION;REACTOME\_SIGNALING\_BY\_ILS;REACTOME\_IL1\_SIGNALING;RE  
TES\_P38\_MAPK\_ACTIVATION;REACTOME\_SIGNALING\_BY\_ILS;REACTOME\_IL1\_SIGNALING;RE

SIGNALING\_BY\_ERBB4

Γ\_THE\_VASCULAR\_WALL;REACTOME\_PLATELET\_ADHESION\_TO\_EXPOSED\_COLLAGEN;REA

G\_PROTEINS\_

;REACTOME\_INTEGRIN\_ALPHAIIIB\_BETA3\_SIGNALING;REACTOME\_MUSCLE\_CONTRACTION

OME\_SIGNALING\_BY\_GPCR;REACTOME\_OPIOID\_SIGNALLING;REACTOME\_CA\_DEPENDENT\_

E\_CD28\_FAMILY;REACTOME\_SIGNALING\_BY\_ILS;REACTOME\_IL\_3\_5\_AND\_GM-CSF\_SIGNALI

\_OF\_MRNA;REACTOME\_METABOLISM\_OF\_MRNA;REACTOME\_DEADENYLATION\_DEPENDEN

PHA;REACTOME\_METABOLISM\_OF\_LIPIDS\_AND\_LIPOPROTEINS;REACTOME\_FATTY\_ACID\_T

IAL\_SYSTEM;REACTOME\_SIGNALING\_BY\_GPCR;REACTOME\_INTEGRATION\_OF\_ENERGY\_M

;ATIONS\_ANIONS\_AND\_AMINO\_ACIDS\_OLIGOPEPTIDES;REACTOME\_AMINO\_ACID\_AND\_OLIK

\_SIGNALING\_BY\_FGFR1\_FUSION\_MUTANTS;REACTOME\_SIGNALING\_BY\_FGFR\_MUTANTS;RI

:NERIC\_TRANSCRIPTION\_PATHWAY;REACTOME\_SIGNALING\_BY\_TGF\_BETA\_RECEPTOR\_CC



ANSCRIPTION;REACTOME\_FORMATION\_OF\_RNA\_POL\_II\_ELONGATION\_COMPLEX\_;REACTO  
TOME\_G\_ALPHA\_I\_SIGNALLING\_EVENTS;REACTOME\_GPCR\_LIGAND\_BINDING;REACTOME\_I

.PHORIN\_INTERACTIONS;REACTOME\_SEMA3A\_PLEXIN\_REPULSION\_SIGNALING\_BY\_INHIBIT

ATIONAL\_PROTEIN\_MODIFICATION;REACTOME\_METABOLISM\_OF\_LIPIDS\_AND\_LIPOPROTEI

ETS\_NUCLEAR\_EVENTS\_MEDIATED\_BY\_MAP\_KINASES;REACTOME\_TRAF6\_MEDIATED\_INDL

IC\_NER;REACTOME\_SYNTHESIS\_OF\_DNA;REACTOME\_MITOTIC\_G1\_G1\_S\_PHASES;REACTO  
\_MEGAKARYOCYTE\_DEVELOPMENT\_AND\_PLATELET\_PRODUCTION;REACTOME\_SIGNALING

TED\_PROTEOLYSIS\_OF\_P75NTR;REACTOME\_NRIF\_SIGNALS\_CELL\_DEATH\_FROM\_THE\_NUC



LEUS;REACTOME\_CELL\_DEATH\_SIGNALLING\_VIA\_NRAGE\_NRIF\_AND\_NADE;REACTOME\_P

'ATION\_MEDIATED\_BY\_TLR4\_SIGNALING\_REPERTOIRE;REACTOME\_MYD88\_MAL\_CASCADE\_

'OME\_SIGNALING\_BY\_ILS;REACTOME\_REGULATION\_OF\_IFNG\_SIGNALING;REACTOME\_INTE

;REACTOME\_OPIOID\_SIGNALLING;REACTOME\_CA\_DEPENDENT\_EVENTS;REACTOME\_PLC\_I

ET\_CYTOSOLIC\_CA2\_;REACTOME\_HEMOSTASIS;REACTOME\_PLATELET\_ACTIVATION\_SIGNA

\_EVENTS;REACTOME\_CREB\_PHOSPHORYLATION\_THROUGH\_THE\_ACTIVATION\_OF\_RAS;RI  
NS

/E\_G\_ALPHA\_Q\_SIGNALLING\_EVENTS;REACTOME\_G\_ALPHA1213\_SIGNALLING\_EVENTS;RE,

CTOME\_NFKB\_AND\_MAP\_KINASES\_ACTIVATION\_MEDIATED\_BY\_TLR4\_SIGNALING\_REPERTC

REACTOME\_TRAF6\_MEDIATED\_INDUCION\_OF\_NFKB\_AND\_MAP\_KINASES\_UPON\_TLR7\_8\_OF  
REACTOME\_TRAF6\_MEDIATED\_INDUCION\_OF\_NFKB\_AND\_MAP\_KINASES\_UPON\_TLR7\_8\_OF

ACTOME\_PECAM1\_INTERACTIONS;REACTOME\_GPVI\_MEDIATED\_ACTIVATION\_CASCADE;RE.

;REACTOME\_AXON\_GUIDANCE;REACTOME\_ACTIVATION\_OF\_CHAPERONE\_GENES\_BY\_XBP

.EVENTS;REACTOME\_PLC\_BETA\_MEDIATED\_EVENTS;REACTOME\_SIGNALING\_BY\_PDGF;RE

NG;REACTOME\_PLATELET\_HOMEOSTASIS;REACTOME\_PLATELET\_SENSITIZATION\_BY\_LDL

T\_MRNA\_DECAY;REACTOME\_METABOLISM\_OF\_RNA;REACTOME\_PKB\_MEDIATED\_EVENTS;F

TRIACYLGLYCEROL\_AND\_KETONE\_BODY\_METABOLISM



ETABOLISM;REACTOME\_OPIOID\_SIGNALLING;REACTOME\_CA\_DEPENDENT\_EVENTS;REACT

3OPEPTIDE\_SLC\_TRANSPORTERS;REACTOME\_HEMOSTASIS

REACTOME\_SIGNALING\_BY\_PDGF;REACTOME\_DOWNSTREAM\_SIGNAL\_TRANSDUCTION;REA

MPLEX

ME\_ELONGATION\_ARREST\_AND\_RECOVERY;REACTOME\_RNA\_POL\_II\_PRE\_TRANSCRIPTIC  
NATE\_IMMUNE\_SYSTEM;REACTOME\_IMMUNE\_SYSTEM;REACTOME\_COMPLEMENT\_CASC/

ING\_INTEGRIN\_ADHESION;REACTOME\_ACTIVATION\_OF\_NMDA\_RECEPTOR\_UPON\_GUTAM

NS

JCTION\_OF\_NFKB\_AND\_MAP\_KINASES\_UPON\_TLR7\_8\_OR\_9\_ACTIVATION;REACTOME\_NFKB

ME\_MITOTIC\_M\_M\_G1\_PHASES;REACTOME\_DNA\_REPAIR;REACTOME\_CHROMOSOME\_MAI  
BY\_NOTCH;REACTOME\_APOPTOSIS;REACTOME\_HEMOSTASIS;REACTOME\_ACTIVATION\_I

LEUS;REACTOME\_CELL\_DEATH\_SIGNALLING\_VIA\_NRAGE\_NRIF\_AND\_NADE;REACTOME\_P



75\_NTR\_RECEPTOR\_MEDIATED\_SIGNALLING;REACTOME\_SIGNALING\_BY\_NOTCH

\_INITIATED\_ON\_PLASMA\_MEMBRANE;REACTOME\_INNATE\_IMMUNE\_SYSTEM;REACTOME\_AI

:RFERON\_GAMMA\_SIGNALING;REACTOME\_INTERFERON\_ALPHA\_BETA\_SIGNALING;REACTC

BETA\_MEDIATED\_EVENTS;REACTOME\_SIGNALING\_BY\_PDGF;REACTOME\_DOWNSTREAM\_S

ALING\_AND\_AGGREGATION

REACTOME\_POST\_NMDA\_RECEPTOR\_ACTIVATION\_EVENTS;REACTOME\_UNBLOCKING\_OF\_N

REACTOME\_GPCR\_DOWNSTREAM\_SIGNALING;REACTOME\_NETRIN1\_SIGNALING;REACTOME\_

REACTOME\_RIG\_I\_MDA5\_MEDIATED\_INDUCTION\_OF\_IFN\_ALPHA\_BETA\_PATHWAYS;RI

IFN\_GAMMA\_ACTIVATION;REACTOME\_NFKB\_AND\_MAP\_KINASES\_ACTIVATION\_MEDIATED\_BY\_TLR4\_  
IFN\_GAMMA\_ACTIVATION;REACTOME\_NFKB\_AND\_MAP\_KINASES\_ACTIVATION\_MEDIATED\_BY\_TLR4\_

ACTOME\_CD28\_CO\_STIMULATION;REACTOME\_COSTIMULATION\_BY\_THE\_CD28\_FAMILY;RE,

1S;REACTOME\_UNFOLDED\_PROTEIN\_RESPONSE;REACTOME\_SEMAPHORIN\_INTERACTION



ACTOME\_DOWNSTREAM\_SIGNAL\_TRANSDUCTION;REACTOME\_G\_ALPHA\_Q\_SIGNALLING\_E

;REACTOME\_IL\_RECEPTOR\_SHC\_SIGNALING;REACTOME\_SIGNAL\_REGULATORY\_PROTEIN\_

REACTOME\_SIGNALING\_BY\_INSULIN\_RECEPTOR;REACTOME\_MTORC1\_MEDIATED\_SIGNALL

ACTOME\_ADENYLATE\_CYCLASE\_ACTIVATING\_PATHWAY;REACTOME\_ADENYLATE\_CYCLASE\_I

ACTOME\_SIGNALING\_BY\_ILS;REACTOME\_IL\_3\_5\_AND\_GM-CSF\_SIGNALING;REACTOME\_IL\_2

IN\_EVENTS;REACTOME\_INFLUENZA\_LIFE\_CYCLE;REACTOME\_INFLUENZA\_VIRAL\_RNA\_TRAI  
ADE;REACTOME\_ADAPTIVE\_IMMUNE\_SYSTEM;REACTOME\_INITIAL\_TRIGGERING\_OF\_COMP

MATE\_BINDING\_AND\_POSTSYNAPTIC\_EVENTS;REACTOME\_CREB\_PHOSPHORYLATION\_THR

3\_AND\_MAP\_KINASES\_ACTIVATION\_MEDIATED\_BY\_TLR4\_SIGNALING\_REPERTOIRE;REACTO

NTENANCE;REACTOME\_GLOBAL\_GENOMIC\_NER\_GG\_NER;REACTOME\_DNA\_REPLICATION;I  
OF\_BH3\_ONLY\_PROTEINS;REACTOME\_INTRINSIC\_PATHWAY\_FOR\_APOPTOSIS

75\_NTR\_RECEPTOR\_MEDIATED\_SIGNALLING;REACTOME\_SIGNALING\_BY\_NOTCH





ACTIVATED\_TLR4\_SIGNALLING;REACTOME\_IMMUNE\_SYSTEM;REACTOME\_TOLL\_RECEPTOR\_

OME\_REGULATION\_OF\_IFNA\_SIGNALING;REACTOME\_INTERFERON\_SIGNALING;REACTOME\_

SIGNAL\_TRANSDUCTION;REACTOME\_G\_ALPHA\_Q\_SIGNALLING\_EVENTS;REACTOME\_GPCR\_

IMDA\_RECEPTOR\_Glutamate\_BINDING\_AND\_ACTIVATION;REACTOME\_CREB\_PHOSPHOR'

DCC\_MEDIATED\_ATTRACTIVE\_SIGNALING

REACTOME\_MYD88\_MAL\_CASCADE\_INITIATED\_ON\_PLASMA\_MEMBRANE;REACTOME\_INNATE

\_SIGNALING\_REPERTOIRE;REACTOME\_MYD88\_MAL\_CASCADE\_INITIATED\_ON\_PLASMA\_MEI  
\_SIGNALING\_REPERTOIRE;REACTOME\_MYD88\_MAL\_CASCADE\_INITIATED\_ON\_PLASMA\_MEI



ACTOME\_CTLA4\_INHIBITORY\_SIGNALING;REACTOME\_SIGNALING\_BY\_ILS;REACTOME\_REGI

S;REACTOME\_SEMA3A\_PLEXIN\_REPULSION\_SIGNALING\_BY\_INHIBITING\_INTEGRIN\_ADHES

:VENTS;REACTOME\_GPCR\_DOWNSTREAM\_SIGNALING;REACTOME\_DOWNSTREAM\_SIGNAL

\_SIRP\_FAMILY\_INTERACTIONS;REACTOME\_REGULATION\_OF\_IFNG\_SIGNALING;REACTOME\_

.ING;REACTOME\_PI3K\_CASCADE

INHIBITORY\_PATHWAY;REACTOME\_NEUROTRANSMITTER\_RECEPTOR\_BINDING\_AND\_DOWN

\_SIGNALING;REACTOME\_IMMUNE\_SYSTEM;REACTOME\_CYTOKINE\_SIGNALING\_IN\_IMMUNE

DESCRIPTION\_AND\_REPLICATION;REACTOME\_HIV\_INFECTION;REACTOME\_HIV\_LIFE\_CYCLE;  
LEMENT

OUGH\_THE\_ACTIVATION\_OF\_RAS;REACTOME\_POST\_NMDA\_RECEPTOR\_ACTIVATION\_EVEI

OME\_MYD88\_MAL\_CASCADE\_INITIATED\_ON\_PLASMA\_MEMBRANE;REACTOME\_INNATE\_IMM

REACTOME\_TELOMERE\_MAINTENANCE;REACTOME\_EXTENSION\_OF\_TELOMERES;REACTO





\_CASCADES

\_IL\_6\_SIGNALING;REACTOME\_IMMUNE\_SYSTEM;REACTOME\_CYTOKINE\_SIGNALING\_IN\_IMM

\_DOWNSTREAM\_SIGNALING;REACTOME\_G\_ALPHA\_Z\_SIGNALLING\_EVENTS;REACTOME\_ME



YLATION\_THROUGH\_THE\_ACTIVATION\_OF\_CAMKII;REACTOME\_INTERFERON\_GAMMA\_SIGN

:\_IMMUNE\_SYSTEM;REACTOME\_ACTIVATED\_TLR4\_SIGNALLING;REACTOME\_IMMUNE\_SYST

MBRANE;REACTOME\_INNATE\_IMMUNE\_SYSTEM;REACTOME\_ACTIVATED\_TLR4\_SIGNALLING  
MBRANE;REACTOME\_INNATE\_IMMUNE\_SYSTEM;REACTOME\_ACTIVATED\_TLR4\_SIGNALLING

JLATION\_OF\_SIGNALING\_BY\_CBL;REACTOME\_IL\_3\_5\_AND\_GM\_CSF\_SIGNALING;REACTOME

ION;REACTOME\_SMOOTH\_MUSCLE\_CONTRACTION;REACTOME\_PLATELET\_AGGREGATION.

.ING\_OF\_ACTIVATED\_FGFR;REACTOME\_PHOSPHOLIPASE\_C\_MEDIATED\_CASCADE;REACTC

\_INTERFERON\_GAMMA\_SIGNALING;REACTOME\_INTERFERON\_ALPHA\_BETA\_SIGNALING;RE

STREAM\_TRANSMISSION\_IN\_THE\_POSTSYNAPTIC\_CELL;REACTOME\_PLC\_BETA\_MEDIATEI

SYSTEM

REACTOME\_ABORTIVE\_ELONGATION\_OF\_HIV1\_TRANSCRIPT\_IN\_THE\_ABSENCE\_OF\_TAT;R

NTS

UNE\_SYSTEM;REACTOME\_ACTIVATED\_TLR4\_SIGNALLING;REACTOME\_IMMUNE\_SYSTEM;RE

ME\_S\_PHASE







IUNE\_SYSTEM

TABOLISM\_OF\_MRNA;REACTOME\_METABOLISM\_OF\_RNA;REACTOME\_DOWNSTREAM\_SIGN

JALING;REACTOME\_INTERFERON\_SIGNALING;REACTOME\_IMMUNE\_SYSTEM;REACTOME\_C'

EM;REACTOME\_TOLL\_RECEPTOR\_CASCADES

;REACTOME\_IMMUNE\_SYSTEM;REACTOME\_TOLL\_RECEPTOR\_CASCADES;REACTOME\_NOI  
;REACTOME\_IMMUNE\_SYSTEM;REACTOME\_TOLL\_RECEPTOR\_CASCADES;REACTOME\_NOI

≡\_HEMOSTASIS;REACTOME\_IMMUNE\_SYSTEM;REACTOME\_ADAPTIVE\_IMMUNE\_SYSTEM;RE

\_PLUG\_FORMATION;REACTOME\_HEMOSTASIS;REACTOME\_PLATELET\_ACTIVATION\_SIGNAL

ME\_SIGNALING\_BY\_FGFR

ACTOME\_REGULATION\_OF\_IFNA\_SIGNALING;REACTOME\_INTERFERON\_SIGNALING;REACT

D\_EVENTS;REACTOME\_PKA\_MEDIATED\_PHOSPHORYLATION\_OF\_CREB;REACTOME\_TRANS

!EACTOME\_FORMATION\_OF\_THE\_HIV1\_EARLY\_ELONGATION\_COMPLEX;REACTOME\_VIRAL\_

FACTOME\_TOLL\_RECEPTOR\_CASCADES







IALING\_OF\_ACTIVATED\_FGFR;REACTOME\_PHOSPHOLIPASE\_C\_MEDIATED\_CASCADE;REAC

YTOKINE\_SIGNALING\_IN\_IMMUNE\_SYSTEM

J1\_2\_SIGNALING\_PATHWAY;REACTOME\_CYTOKINE\_SIGNALING\_IN\_IMMUNE\_SYSTEM;REAC  
J1\_2\_SIGNALING\_PATHWAY;REACTOME\_CYTOKINE\_SIGNALING\_IN\_IMMUNE\_SYSTEM;REAC

REACTOME\_CYTOKINE\_SIGNALING\_IN\_IMMUNE\_SYSTEM;REACTOME\_PLATELET\_ACTIVATION

ADHESION\_AND\_AGGREGATION

OME\_IL\_2\_SIGNALING;REACTOME\_HEMOSTASIS;REACTOME\_IMMUNE\_SYSTEM;REACTOME

MEMBRANE\_TRANSPORT\_OF\_SMALL\_MOLECULES;REACTOME\_GLUCAGON\_SIGNALING\_IN

\_MESSENGER\_RNA\_SYNTHESIS;REACTOME\_LATE\_PHASE\_OF\_HIV\_LIFE\_CYCLE









:TOME\_EFFECTS\_OF\_PIP2\_HYDROLYSIS;REACTOME\_REGULATION\_OF\_MRNA\_STABILITY\_B

;TOME\_NUCLEOTIDE\_BINDING\_DOMAIN\_LEUCINE\_RICH\_REPEAT\_CONTAINING\_RECEPTOR,  
;TOME\_NUCLEOTIDE\_BINDING\_DOMAIN\_LEUCINE\_RICH\_REPEAT\_CONTAINING\_RECEPTOR,

|\_SIGNALING\_AND\_AGGREGATION

\_ADAPTIVE\_IMMUNE\_SYSTEM;REACTOME\_CYTOKINE\_SIGNALING\_IN\_IMMUNE\_SYSTEM

\_METABOLIC\_REGULATION;REACTOME\_SIGNALING\_BY\_PDGF;REACTOME\_DOWNSTREAM\_











BY\_PROTEINS\_THAT\_BIND\_AU\_RICH\_ELEMENTS;REACTOME\_INTERFERON\_GAMMA\_SIGNAL

\_NLR\_SIGNALING\_PATHWAYS  
\_NLR\_SIGNALING\_PATHWAYS





\_SIGNAL\_TRANSDUCTION;REACTOME\_GPCR\_DOWNSTREAM\_SIGNALING;REACTOME\_G\_ALI











.ING;REACTOME\_INTERFERON\_SIGNALING;REACTOME\_APOPTOSIS;REACTOME\_HEMOSTASIS









PHA\_I\_SIGNALLING\_EVENTS;REACTOME\_G\_ALPHA\_S\_SIGNALLING\_EVENTS;REACTOME\_G\_









SIS;REACTOME\_IMMUNE\_SYSTEM;REACTOME\_CYTOKINE\_S









\_ALPHA\_Z\_SIGNALLING\_EVENTS;REACTOME\_DOWNSTREAM\_SIG
